# Supplementary material for: Genetic Uniformity of a Specific Region in SARS-CoV-2 Genome and In-Silico Target-Oriented Repurposing of N-Acetyl-D-Glucosamine
Source: Preprints.org preprint supplement (doi:10.20944/preprints202005.0397.v1), 2020-05-24
Supplement: Supplementary file 1 [file supplementary]

1  
2  
3  
4  
5  
6  
7  
8  
9

|                           |         |                                  |                |       |           |
|---------------------------|---------|----------------------------------|----------------|-------|-----------|
| REMARK VINA RESULT:       |         |                                  |                |       |           |
|                           |         | -3.0                             | 2.759          | 4.705 |           |
| REMARK 6 active torsions: |         |                                  |                |       |           |
| REMARK                    | status: | ('A' for Active; T for Inactive) |                |       |           |
| REMARK                    |         | I                                | between atoms: | C2_2  | and N1_4  |
| REMARK                    | 1       | A                                | between atoms: | N1_4  | and C3_5  |
| REMARK                    | 2       | A                                | between atoms: | C4_6  | and 06_15 |
| REMARK                    | 3       | A                                | between atoms: | C5_7  | and 05_14 |
| REMARK                    | 4       | A                                | between atoms: | C6_8  | and C8_12 |
| REMARK                    | 5       | A                                | between atoms: | C7_10 | and 03_11 |
| REMARK                    | 6       | A                                | between atoms: | C8_12 | and 04_13 |

**Table S5a. 6M0J Vina Autodock results.**

|                           |         |                                  |                |       |           |
|---------------------------|---------|----------------------------------|----------------|-------|-----------|
| REMARK VINA RESULT        |         |                                  |                |       |           |
|                           |         | -3.6                             | 2.021          | 3.190 |           |
| REMARK 6 active torsions: |         |                                  |                |       |           |
| REMARK                    | status: | ('A' for Active; T for Inactive) |                |       |           |
| REMARK                    |         | I                                | between atoms: | C2_2  | and N1_4  |
| REMARK                    | 1       | A                                | between atoms: | N1_4  | and C3_5  |
| REMARK                    | 2       | A                                | between atoms: | C4_6  | and 06_15 |
| REMARK                    | 3       | A                                | between atoms: | C5_7  | and 05_14 |
| REMARK                    | 4       | A                                | between atoms: | C6_8  | and C8_12 |
| REMARK                    | 5       | A                                | between atoms: | C7_10 | and 03_11 |
| REMARK                    | 6       | A                                | between atoms: | C8_12 | and 04_13 |

**Table S5b. 6WKP Vina Autodock results.**
