# Supplementary material for: Genetic Uniformity of a Specific Region in SARS-CoV-2 Genome and In-Silico Target-Oriented Repurposing of N-Acetyl-D-Glucosamine
Source: Preprints.org preprint supplement (doi:10.20944/preprints202005.0397.v1), 2020-05-24
Supplement: Supplementary file 2 [file supplementary]

hCoV-19/Hangzhou/HZCDC0119/2020|EPI\_ISL\_421226|2020-01-22  
hCoV-19/Hangzhou/ZJU-09/2020|EPI\_ISL\_416474|2020-01-28  
hCoV-19/Slovakia/SK-BMC6/2020|EPI\_ISL\_417880|2020-03-08  
hCoV-19/Germany/NRW-17/2020|EPI\_ISL\_419534|2020-03-11  
hCoV-19/Wales/PHWC-255E8/2020|EPI\_ISL\_421010|2020-03-23  
hCoV-19/England/CAMB-77022/2020|EPI\_ISL\_425452|2020-03-31  
  
hCoV-19/Singapore/31/2020|EPI\_ISL\_420108|2020-03-10  
hCoV-19/Norway/2087/2020|EPI\_ISL\_420151|2020-03-17  
hCoV-19/Wuhan/HBCDC-HB-02/2019|EPI\_ISL\_412898|2019-12-30

hCoV-19/USA/MN-MDH-141/2020|EPI\_ISL\_427280|2020-03-21  
hCoV-19/USA/WA-S50/2020|EPI\_ISL\_417103|2020-03-05  
hCoV-19/Australia/QLDID931/2020|EPI\_ISL\_420879|2020-03-25  
  
hCoV-19/Korea/KCDC2018/2020|EPI\_ISL\_427812|2020-02-19  
hCoV-19/Beijing/Wuhan\_IME-BJ03/2020|EPI\_ISL\_424357|2020-01-28  
hCoV-19/Beijing/Wuhan\_IME-BJ02/2020|EPI\_ISL\_424356|2020-01-25  
hCoV-19/South  
  
hCoV-19/Germany/BavPat3/2020|EPI\_ISL\_414521|2020-03-02  
  
hCoV-19/Germany/NRW-39/2020|EPI\_ISL\_425123|2020-03-17  
  
hCoV-19/USA/GA\_2118/2020|EPI\_ISL\_424861|2020-03-08  
  
hCoV-19/Spain/CastillayLeon201437/2020|EPI\_ISL\_416994|2020-03-04  
hCoV-19/Spain/Valencia39/2020|EPI\_ISL\_420124|2020-03-09

hCoV-19/Singapore/25/2020|EPI\_ISL\_420102|2020-03-05  
  
hCoV-19/Slovenia/MB0329/2020|EPI\_ISL\_426379|2020-03-29  
hCoV-19/Malaysia/188407/2020|EPI\_ISL\_417918|2020-03-18  
  
hCoV-19/Brazil/SC-766/2020|EPI\_ISL\_427305|2020-03-10  
hCoV-19/Taiwan/TSGH-11/2020|EPI\_ISL\_427398|2020-03-25  
  
hCoV-19/Japan/DP0191/2020|EPI\_ISL\_416582|2020-02-15  
hCoV-19/Japan/DP0200/2020|EPI\_ISL\_416584|2020-02-15  
hCoV-19/Turkey/ERAGEM-001/2020|EPI\_ISL\_424366|2020-03-17  
  
hCoV-19/Taiwan/TSGH-06/2020|EPI\_ISL\_427393|2020-03-15  
hCoV-19/Hong  
  
hCoV-19/England/20132024604/2020|EPI\_ISL\_423758|2020-03-22  
hCoV-19/Scotland/EDB108/2020|EPI\_ISL\_425896|2020-03-22  
  
hCoV-19/Belgium/ULG-10080/2020|EPI\_ISL\_424641|2020-04-03  
  
hCoV-19/Qatar/QA20/2020|EPI\_ISL\_427416|2020-03-23  
hCoV-19/Qatar/QA21/2020|EPI\_ISL\_427417|2020-03-23  
  
hCoV-19/Taiwan/2/2020|EPI\_ISL\_406031|2020-01-23  
hCoV-19/Guangdong/GD2020087-P0008/2020|EPI\_ISL\_413863|2020-02-01

hCoV-19/Hangzhou/HZCDC0135/2020|EPI\_ISL\_421225|2020-01-22  
  
hCoV-19/Shanghai/SH0053/2020|EPI\_ISL\_416361|2020-02-01  
  
hCoV-19/USA/WA-UW-4337/2020|EPI\_ISL\_427267|2020-03-30  
hCoV-19/USA/NY-WCMP5H02P/2020|EPI\_ISL\_427542|2020-03-13  
hCoV-19/USA/NY-NYUMC239/2020|EPI\_ISL\_427638|2020-04-06  
hCoV-19/USA/UT-00022/2020|EPI\_ISL\_418964|2020-03-14  
hCoV-19/Luxembourg/LNS9982497/2020|EPI\_ISL\_419607|2020-03-14  
hCoV-19/Algeria/G0860\_2262/2020|EPI\_ISL\_420037|2020-03-02  
hCoV-19/France/HF2306/2020|EPI\_ISL\_421500|2020-03-11  
  
hCoV-19/Norway/2084/2020|EPI\_ISL\_420150|2020-03-09  
hCoV-19/France/IDF2414/2020|EPI\_ISL\_421503|2020-03-12  
hCoV-19/France/IDF3274/2020|EPI\_ISL\_421507|2020-03-23  
hCoV-19/USA/WY-WYPHL007/2020|EPI\_ISL\_421544|2020-03-15  
hCoV-19/USA/NY-PV09069/2020|EPI\_ISL\_422490|2020-03-20  
hCoV-19/USA/WA-UW-1947/2020|EPI\_ISL\_424327|2020-03-23  
hCoV-19/USA/MN-MDH-149/2020|EPI\_ISL\_427287|2020-03-23  
  
hCoV-19/Iceland/565/2020|EPI\_ISL\_424585|2020-03-28  
hCoV-19/Taiwan/CGMH-CGU-14/2020|EPI\_ISL\_424970|2020-03-17

hCoV-19/USA/NY-NYUMC219/2020|EPI\_ISL\_427514|2020-04-03  
hCoV-19/USA/NY-NYUMC151/2020|EPI\_ISL\_424958|2020-04-01  
  
hCoV-19/NanChang/JX216/2020|EPI\_ISL\_417420|2020-03-23

hCoV-19/Germany/NRW-52/2020|EPI\_ISL\_425136|2020-03-14  
hCoV-19/Spain/Valencia69/2020|EPI\_ISL\_425193|2020-03-17  
hCoV-19/Germany/NRW-43/2020|EPI\_ISL\_425138|2020-03-19  
hCoV-19/Finland/13M64/2020|EPI\_ISL\_418394|2020-03-13  
hCoV-19/Kuwait/KU001/2020|EPI\_ISL\_421652|2020-03-16

hCoV-19/Japan/P3-2/2020|EPI\_ISL\_419300|2020-03-20  
hCoV-19/Japan/P2-1/2020|EPI\_ISL\_419297|2020-03-10  
hCoV-19/Turkey/GLAB-CoV008/2020|EPI\_ISL\_427391|2020-04-13  
  
hCoV-19/Saudi  
hCoV-19/England/NOTT-10EA6D/2020|EPI\_ISL\_425631|2020-03-29

hCoV-19/Belgium/ULG-10134/2020|EPI\_ISL\_427379|2020-04-08  
hCoV-19/France/Pollionay\_1733/2020|EPI\_ISL\_416745|2020-03-10  
hCoV-19/France/ARA12996/2020|EPI\_ISL\_420620|2020-03-23  
hCoV-19/France/ARA13095/2020|EPI\_ISL\_420623|2020-03-24  
hCoV-19/France/IDF3236/2020|EPI\_ISL\_421506|2020-03-21  
  
hCoV-19/Spain/Madrid\_H12\_1804/2021|EPI\_ISL\_421174|2020-03-29  
hCoV-19/Spain/Madrid\_H12\_1301/2020|EPI\_ISL\_421171|2020-03-05  
  
hCoV-19/Russia/StPetersburg-RII4144S/2020|EPI\_ISL\_427307|2020-03-20  
hCoV-19/Hungary/2/2020|EPI\_ISL\_418183|2020-03-17  
hCoV-19/Finland/14M77/2020|EPI\_ISL\_418410|2020-03-14  
hCoV-19/Netherlands/ZuidHolland\_61/2020|EPI\_ISL\_422929|2020-03-23  
hCoV-19/Netherlands/ZuidHolland\_80/2020|EPI\_ISL\_422948|2020-03-27  
hCoV-19/Iceland/555/2020|EPI\_ISL\_424575|2020-03-28  
hCoV-19/Spain/Valencia75/2020|EPI\_ISL\_425199|2020-03-19  
hCoV-19/Scotland/EDB232/2020|EPI\_ISL\_425951|2020-03-27

hCoV-19/Portugal/PT0045/2020|EPI\_ISL\_421448|2020-03-18  
hCoV-19/Portugal/PT0096/2020|EPI\_ISL\_421499|2020-03-24  
hCoV-19/Portugal/PT0083/2020|EPI\_ISL\_421486|2020-03-22  
hCoV-19/Czech  
hCoV-19/Greece/13/2020|EPI\_ISL\_427043|2020-03-18  
hCoV-19/USA/AZ-TG271868/2020|EPI\_ISL\_427272|2020-03-23  
hCoV-19/Scotland/EDB561/2020|EPI\_ISL\_426020|2020-04-01  
  
hCoV-19/Brazil/RJ-872/2020|EPI\_ISL\_427304|2020-03-26  
hCoV-19/Switzerland/GE1422/2020|EPI\_ISL\_415454|2020-02-28  
  
hCoV-19/Russia/StPetersburg-RII4308V/2020|EPI\_ISL\_427309|2020-03-24  
hCoV-19/Russia/StPetersburg-RII4723S/2020|EPI\_ISL\_427332|2020-04-07  
hCoV-19/Switzerland/GE0199/2020|EPI\_ISL\_415455|2020-02-28  
hCoV-19/Belgium/UGent-12/2020|EPI\_ISL\_419264|2020-03-20

hCoV-19/Japan/P4-3/2020|EPI\_ISL\_419303|2020-03-12  
hCoV-19/Georgia/Tb-1679/2020|EPI\_ISL\_420144|2020-04-01  
hCoV-19/Germany/BAV-V2012856/2020|EPI\_ISL\_420912|2020-03-21  
hCoV-19/Portugal/PT0045/2020|EPI\_ISL\_421448|2020-03-18  
hCoV-19/Portugal/PT0083/2020|EPI\_ISL\_421486|2020-03-22  
hCoV-19/Portugal/PT0093/2020|EPI\_ISL\_421496|2020-03-24  
hCoV-19/Taiwan/CGMH-CGU-20/2020|EPI\_ISL\_424978|2020-03-18  
hCoV-19/Kuwait/KU008/2020|EPI\_ISL\_422427|2020-03-16

hCoV-19/England/20132104404/2020|EPI\_ISL\_423838|2020-03-24  
  
hCoV-19/Australia/VIC888/2020|EPI\_ISL\_427141|2020-04-06  
hCoV-19/Germany/BAV-V2010486/2020|EPI\_ISL\_420898|2020-03-11  
hCoV-19/Germany/BAV-V2012622/2020|EPI\_ISL\_420911|2020-03-19  
hCoV-19/England/20129158804/2020|EPI\_ISL\_424119|2020-03-21

hCoV-19/Czech  
  
hCoV-19/Netherlands/NA\_26/2020|EPI\_ISL\_415483|2020-03-09  
hCoV-19/Scotland/EDB168/2020|EPI\_ISL\_425925|2020-03-24

hCoV-19/Germany/NRW-48/2020|EPI\_ISL\_425132|2020-03-23  
hCoV-19/USA/AZ-TG268281/2020|EPI\_ISL\_426503|2020-03-17  
hCoV-19/Belgium/ULG-10107/2020|EPI\_ISL\_427358|2020-04-06  
hCoV-19/Belgium/ULG-10141/2020|EPI\_ISL\_427386|2020-04-08  
hCoV-19/USA/UT-00342/2020|EPI\_ISL\_420816|2020-03-24  
hCoV-19/Wales/PHWC-26329/2020|EPI\_ISL\_422354|2020-03-26  
hCoV-19/Wales/PHWC-26C3D/2020|EPI\_ISL\_422165|2020-03-30  
hCoV-19/Wales/PHWC-266F3/2020|EPI\_ISL\_422109|2020-03-27

hCoV-19/USA/WI-147/2020|EPI\_ISL\_427454|2020-04-10  
hCoV-19/USA/WI-103/2020|EPI\_ISL\_425160|2020-04-03  
  
hCoV-19/Netherlands/NA\_31/2020|EPI\_ISL\_415488|2020-03-13  
hCoV-19/Denmark/SSI-04/2020|EPI\_ISL\_416153|2020-03-02  
hCoV-19/South  
hCoV-19/Senegal/087/2020|EPI\_ISL\_418212|2020-03-11  
hCoV-19/USA/AK-PHL002/2020|EPI\_ISL\_420303|2020-03-15  
hCoV-19/India/772/2020|EPI\_ISL\_420547|2020-03-03  
hCoV-19/India/2020781/2020|EPI\_ISL\_420554|2020  
  
hCoV-19/Netherlands/ZuidHolland\_62/2020|EPI\_ISL\_422930|2020-03-23  
hCoV-19/Italy/INMI9/2020|EPI\_ISL\_424343|2020-03-23  
hCoV-19/Italy/INMI10/2020|EPI\_ISL\_424344|2020-03-04  
hCoV-19/Belgium/UGent-25/2020|EPI\_ISL\_425064|2020-03-25
