# Supplementary material for: Genetic Uniformity of a Specific Region in SARS-CoV-2 Genome and In-Silico Target-Oriented Repurposing of N-Acetyl-D-Glucosamine
Source: Preprints.org preprint supplement (doi:10.20944/preprints202005.0397.v1), 2020-05-24
Supplement: Supplementary file 5 [file supplementary]

## Navigation Tabs

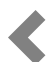

### Biological Assembly 1

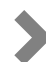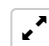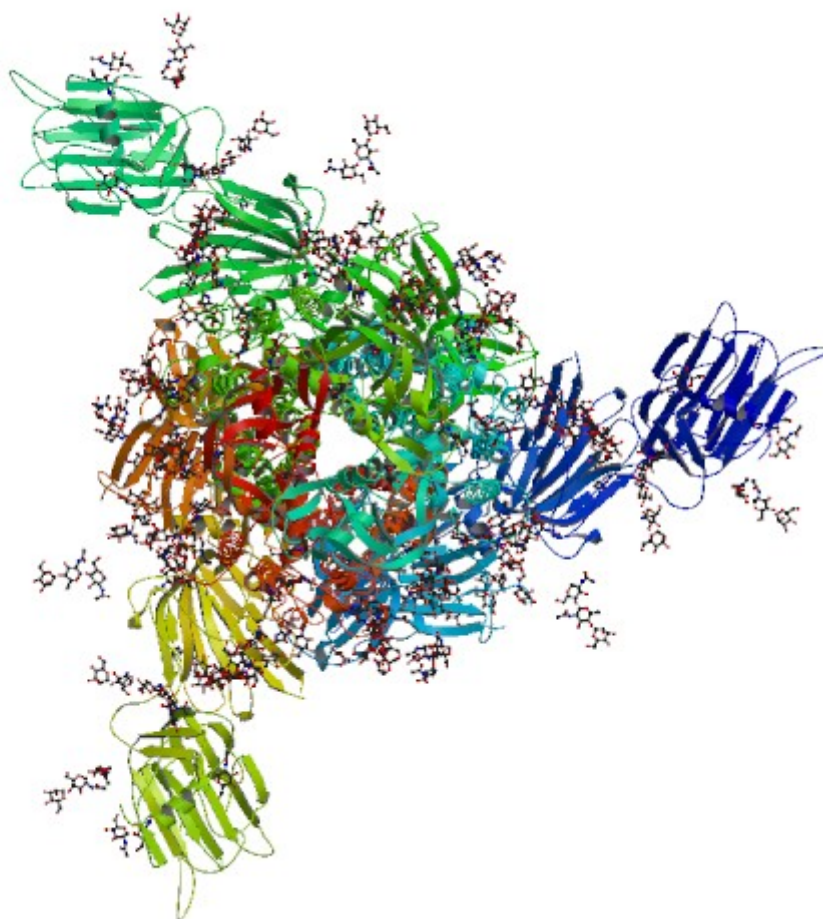

 **3D View:** Structure | Ligand Interaction

**Standalone Viewers (To be retired June 1st )**

Protein Workshop | Ligand Explorer

**Global Symmetry:** Cyclic - C3 (3D View)

**Global Stoichiometry:** Homo 3-mer - A3

Find Similar Assemblies

Biological assembly 1 assigned by authors.

**Biological Assembly Evidence:** gel filtration

Display Files ▼

Download Files ▼

# 6JX7

Cryo-EM structure of spike protein of feline infectious peritonitis virus strain UU4

**DOI:** 10.2210/pdb6JX7/pdb **EMDataResource:** EMD-9891

**Classification:** VIRAL PROTEIN

**Organism(s):** Feline infectious peritonitis virus

**Expression System:** Homo sapiens

**Deposited:** 2019-04-22 **Released:** 2020-01-15

**Deposition Author(s):** Hsu, S.T.D., Yang, T.J., Ko, T.P., Draczkowski, P.

**Funding Organization(s):** Ministry of Science and Technology (Taiwan), Academia Sinica (Taiwan)

## Experimental Data Snapshot

**Method:** ELECTRON MICROSCOPY

**Resolution:** 3.31 Å

**Aggregation State:** PARTICLE

**Reconstruction Method:** SINGLE PARTICLE

## wwPDB Validation

3D Report

Full Report

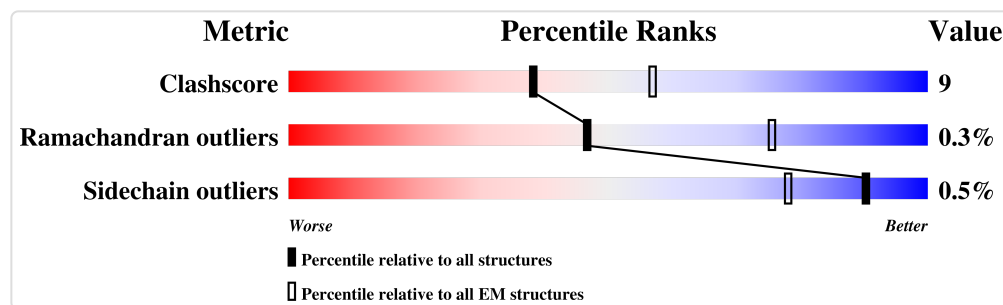

This is version 1.1 of the entry. See complete history.

## Literature

Cryo-EM analysis of a feline coronavirus spike protein reveals a unique structure and camouflaging glycans.

**Yang, T.J., Chang, Y.C., Ko, T.P., Draczkowski, P., Chien, Y.C., Chang, Y.C., Wu, K.P., Khoo, K.H., Chang, H.W., Hsu, S.D.**

(2020) Proc Natl Acad Sci U S A **117**: 1438-1446

**PubMed:** [31900356](https://pubmed.ncbi.nlm.nih.gov/31900356/)

DOI: 10.1073/pnas.1908898117

Structures With Same Primary Citation

PubMed Abstract:

Macromolecules

Find similar proteins by: Sequence | Structure

| Entity ID: 1                                                                    |         |                 |                                            |                        |
|---------------------------------------------------------------------------------|---------|-----------------|--------------------------------------------|------------------------|
| Molecule                                                                        | Chains  | Sequence Length | Organism                                   | Details                |
| Feline Infectious Peritonitis Virus Spike Protein                               | A, B, C | 1468            | <b>Feline infectious peritonitis virus</b> | <b>Mutation (s): 0</b> |
| Protein Feature View is not available: No corresponding UniProt sequence found. |         |                 |                                            |                        |

Small Molecules

| Ligands 4 Unique |         |                                                                                                                 |            |                 |
|------------------|---------|-----------------------------------------------------------------------------------------------------------------|------------|-----------------|
| ID               | Chains  | Name / Formula / InChI Key                                                                                      | 2D Diagram | 3D Interactions |
| NAG              | A, B, C | <b>N-ACETYL-D-GLUCOSAMINE</b><br>C <sub>8</sub> H <sub>15</sub> N O <sub>6</sub><br>OVRNDRQMDRJTHS-FMDGEEDCSA-N |            |                 |
| BMA              | A, B, C | <b>BETA-D-MANNOSE</b><br>C <sub>6</sub> H <sub>12</sub> O <sub>6</sub><br>WQZGKKKJIJFFOK-RWOPYEJCSA-N           |            |                 |
| MAN              | A, B, C | <b>ALPHA-D-MANNOSE</b><br>C <sub>6</sub> H <sub>12</sub> O <sub>6</sub><br>WQZGKKKJIJFFOK-PQMKYFCFSA-N          |            |                 |
| FUC              | A, B, C | <b>ALPHA-L-FUCOSE</b><br>C <sub>6</sub> H <sub>12</sub> O <sub>5</sub><br>SHZGCJCMOBCMKK-SXUWKVJYSA-N           |            |                 |

## Experimental Data & Validation

### Experimental Data

**Method:** ELECTRON MICROSCOPY

**Resolution:** 3.31 Å

**Aggregation State:** PARTICLE

**Reconstruction Method:** SINGLE PARTICLE

### Structure Validation

[View Full Validation Report](#)

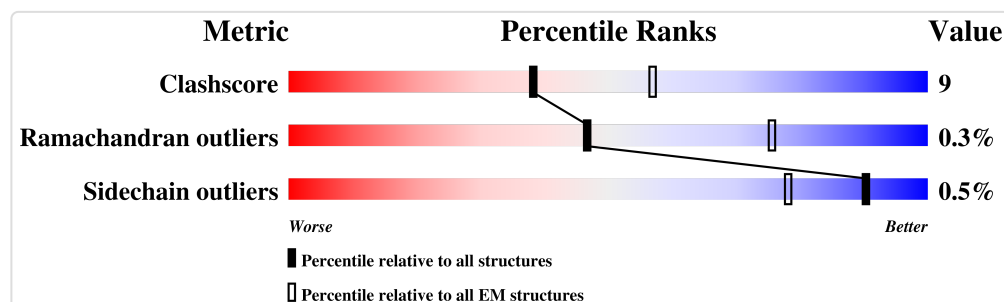

## Entry History & Funding Information

### Deposition Data

**Deposited Date:** 2019-04-22

**Released Date:** 2020-01-15

**Deposition Author(s):** Hsu, S.T.D., Yang, T.J., Ko, T.P., Draczkowski, P.

| Funding Organization                        | Location | Grant Number           |
|---------------------------------------------|----------|------------------------|
| Ministry of Science and Technology (Taiwan) | Taiwan   | 106-2311-B-002-028-MY3 |
| Ministry of Science and Technology (Taiwan) | Taiwan   | 107-2628-M-001-005-MY3 |
| Academia Sinica (Taiwan)                    | Taiwan   | AS-KPQ-105-TPP         |

### Revision History

- **Version 1.0: 2020-01-15**  
Type: Initial release
- **Version 1.1: 2020-02-05**  
Changes: Database references

RCSB PDB is funded by the National Science Foundation (DBI-1832184), the US Department of Energy (DE-SC0019749), and the National Cancer Institute, National Institute of Allergy and Infectious Diseases, and National Institute of General Medical Sciences of the National Institutes of Health under grant R01GM133198.
