# Supplementary material for: Genetic Uniformity of a Specific Region in SARS-CoV-2 Genome and In-Silico Target-Oriented Repurposing of N-Acetyl-D-Glucosamine
Source: Preprints.org preprint supplement (doi:10.20944/preprints202005.0397.v1), 2020-05-24
Supplement: Supplementary file 7 [file supplementary]

Archive with 36 entries (34 files):
- S3 File .pdf
- S2b File.pdf
- S2a File.pdf
- S1 File .pdf
- S7 File/
- S7 File/clusters.dock4.csv
- S7 File/clusters.dock4.pdb
- S7 File/clusters.zip
- S7 File/complex.crd
- S7 File/complex.psf
- S7 File/eadock3.err
- S7 File/ligand.par
- S7 File/ligand.rtf
- S7 File/open.chimerax
- S7 File/params
- S7 File/readme.txt
- S7 File/target.crd
- S7 File/target.pdb
- S7 File/test.inp
- S6 File/
- S6 File/clusters.dock4.csv
- S6 File/clusters.dock4.pdb
- S6 File/clusters.zip
- S6 File/complex.crd
- S6 File/complex.psf
- S6 File/eadock3.err
- S6 File/ligand.par
- S6 File/ligand.rtf
- S6 File/open.chimerax
- S6 File/params
- S6 File/readme.txt
- S6 File/target.crd
- S6 File/target.pdb
- S6 File/test.inp
- S5 File.pdf
- S4 File.pdf
