# Supplementary material for: Genetic Uniformity of a Specific Region in SARS-CoV-2 Genome and In-Silico Target-Oriented Repurposing of N-Acetyl-D-Glucosamine
Source: Preprints.org preprint supplement (doi:10.20944/preprints202005.0397.v1), 2020-05-24
Supplement: Supplementary file 7 [file supplementary › S6 File/clusters.dock4.csv]

Cluster ClusterRank deltaG deltaGelec deltaGvdw deltaGligsolvnonpol deltaGligsolvpol deltaGprotsolvnonpol deltaGprotsolvpol deltaGcompsolvnonpol deltaGcompsolvpol extraFull surfFull solvFull IntraFull InterFull FullFitness SimpleFitness Energy
0 0 -6.549531 0.0 -31.0391 6.70309 -19.1642 403.01 -3070.97 402.967 -3073.55 0.0 402.967 -3073.55 64.6761 -31.0391 -2636.946 -0.660215 -0.660215
0 1 -6.4972405 0.0 -33.0161 6.64085 -17.2925 403.01 -3070.97 403.333 -3068.43 0.0 403.333 -3068.43 63.5982 -33.0161 -2634.515 1.88962 1.88962
0 2 -6.575631 0.0 -30.1129 6.73826 -16.4239 403.01 -3070.97 402.997 -3072.66 0.0 402.997 -3072.66 65.4889 -30.1129 -2634.2869 2.24202 2.24202
0 3 -6.528002 0.0 -33.1784 6.5688 -16.686 403.01 -3070.97 403.07 -3067.78 0.0 403.07 -3067.78 63.6132 -33.1784 -2634.2751 1.49714 1.49714
0 4 -6.478806 0.0 -30.2138 6.84105 -17.1339 403.01 -3070.97 402.924 -3071.36 0.0 402.924 -3071.36 68.9276 -30.2138 -2629.7222 6.69424 6.69424
0 5 -6.399602 0.0 -29.7237 6.89528 -17.4775 403.01 -3070.97 402.909 -3071.06 0.0 402.909 -3071.06 70.5762 -29.7237 -2627.2986 7.49796 7.49796
0 6 -5.8040457 0.0 -21.6179 6.7242 -17.6515 403.01 -3070.97 402.814 -3074.15 0.0 402.814 -3074.15 67.1171 -21.6179 -2625.8367 5.61793 5.61793
0 7 -5.972726 0.0 -25.8806 6.82816 -18.4992 403.01 -3070.97 403.633 -3072.27 0.0 403.633 -3072.27 69.3805 -25.8806 -2625.137 9.54877 9.54877
1 0 -6.7313566 0.0 -33.807 6.62781 -17.2759 403.01 -3070.97 402.766 -3070.16 0.0 402.766 -3070.16 65.0049 -33.807 -2636.1958 0.420526 0.420526
1 1 -6.4131017 0.0 -33.306 6.77016 -19.6254 403.01 -3070.97 402.699 -3067.76 0.0 402.699 -3067.76 77.0806 -33.306 -2621.2864 10.9355 10.9355
2 0 -6.6369233 0.0 -33.1131 6.83544 -18.2037 403.01 -3070.97 403.37 -3071.23 0.0 403.37 -3071.23 65.194 -33.1131 -2635.7793 4.39314 4.39314
2 1 -6.624111 0.0 -32.8984 6.83153 -18.1154 403.01 -3070.97 403.331 -3071.21 0.0 403.331 -3071.21 65.1632 -32.8984 -2635.614 4.41068 4.41068
2 2 -6.6233706 0.0 -34.2871 6.83542 -20.4194 403.01 -3070.97 403.338 -3071.36 0.0 403.338 -3071.36 68.9628 -34.2871 -2633.3462 5.53515 5.53515
2 3 -6.7263193 0.0 -36.6501 6.90967 -20.268 403.01 -3070.97 403.601 -3069.53 0.0 403.601 -3069.53 73.5577 -36.6501 -2629.0212 12.3333 12.3333
2 4 -6.7263193 0.0 -36.6501 6.90967 -20.268 403.01 -3070.97 403.601 -3069.53 0.0 403.601 -3069.53 73.5577 -36.6501 -2629.0212 12.3333 12.3333
2 5 -6.7620697 0.0 -36.59 6.93889 -20.2576 403.01 -3070.97 403.503 -3070.0 0.0 403.503 -3070.0 74.4442 -36.59 -2628.6428 12.903 12.903
2 6 -6.7620697 0.0 -36.59 6.93889 -20.2576 403.01 -3070.97 403.503 -3070.0 0.0 403.503 -3070.0 74.4442 -36.59 -2628.6428 12.903 12.903
2 7 -6.506709 0.0 -33.9718 6.89898 -21.7471 403.01 -3070.97 403.564 -3071.52 0.0 403.564 -3071.52 75.7257 -33.9718 -2626.2021 13.4266 13.4266
3 0 -6.634457 0.0 -39.9049 6.53185 -15.8761 403.01 -3070.97 400.444 -3054.31 0.0 400.444 -3054.31 58.4896 -39.9049 -2635.2812 -4.94833 -4.94833
3 1 -6.624945 0.0 -39.8966 6.53024 -15.8777 403.01 -3070.97 400.43 -3054.15 0.0 400.43 -3054.15 58.5032 -39.8966 -2635.1133 -4.92277 -4.92277
3 2 -6.293265 0.0 -30.5414 6.53346 -16.3788 403.01 -3070.97 400.587 -3063.93 0.0 400.587 -3063.93 62.0261 -30.5414 -2631.8584 -2.40685 -2.40685
3 3 -6.6830893 0.0 -43.7335 6.58271 -17.2511 403.01 -3070.97 400.455 -3050.5 0.0 400.455 -3050.5 66.8871 -43.7335 -2626.8914 2.31998 2.31998
3 4 -6.751148 0.0 -47.1169 6.39968 -19.4107 403.01 -3070.97 400.452 -3048.82 0.0 400.452 -3048.82 68.9609 -47.1169 -2626.5242 0.929955 0.929955
3 5 -6.8717446 0.0 -51.2783 6.54907 -21.3925 403.01 -3070.97 400.472 -3046.14 0.0 400.472 -3046.14 74.5525 -51.2783 -2622.3938 4.36558 4.36558
3 6 -6.096799 0.0 -31.329 6.60355 -17.0558 403.01 -3070.97 400.664 -3060.19 0.0 400.664 -3060.19 72.8832 -31.329 -2617.9717 8.07343 8.07343
3 7 -6.6594276 0.0 -44.3925 6.80819 -18.8014 403.01 -3070.97 400.716 -3050.7 0.0 400.716 -3050.7 80.3469 -44.3925 -2614.0295 12.7063 12.7063
4 0 -6.0974803 0.0 -21.9724 6.65454 -17.4922 403.01 -3070.97 402.539 -3077.92 0.0 402.539 -3077.92 63.7122 -21.9724 -2633.641 2.5666 2.5666
4 1 -6.057259 0.0 -29.8827 6.69811 -19.7311 403.01 -3070.97 402.444 -3067.06 0.0 402.444 -3067.06 76.8905 -29.8827 -2617.6082 17.044 17.044
4 2 -5.491826 0.0 -21.3897 6.67383 -20.0033 403.01 -3070.97 402.393 -3071.18 0.0 402.393 -3071.18 74.9585 -21.3897 -2615.218 18.9219 18.9219
5 0 -6.338373 0.0 -33.6116 6.71016 -17.3063 403.01 -3070.97 401.282 -3061.65 0.0 401.282 -3061.65 60.3719 -33.6116 -2633.6077 2.09544 2.09544
5 1 -6.4231853 0.0 -34.2307 6.75599 -18.0128 403.01 -3070.97 401.318 -3062.77 0.0 401.318 -3062.77 63.6187 -34.2307 -2632.064 2.47301 2.47301
5 2 -6.335629 0.0 -32.1832 6.6188 -17.145 403.01 -3070.97 401.5 -3064.13 0.0 401.5 -3064.13 69.6311 -32.1832 -2625.182 8.98942 8.98942
5 3 -6.119721 0.0 -30.058 6.90583 -16.4092 403.01 -3070.97 401.521 -3062.74 0.0 401.521 -3062.74 68.2107 -30.058 -2623.0664 9.94716 9.94716
5 4 -5.8697767 0.0 -25.3878 7.06207 -17.753 403.01 -3070.97 401.691 -3067.24 0.0 401.691 -3067.24 68.4396 -25.3878 -2622.4973 10.2275 10.2275
5 5 -6.044451 0.0 -28.5147 6.90277 -15.1227 403.01 -3070.97 401.622 -3062.77 0.0 401.622 -3062.77 67.2543 -28.5147 -2622.4084 10.3281 10.3281
5 6 -6.739192 0.0 -35.7065 6.90138 -20.9971 403.01 -3070.97 401.472 -3068.65 0.0 401.472 -3068.65 81.5982 -35.7065 -2621.2864 14.8419 14.8419
5 7 -6.3611555 0.0 -35.1889 6.89601 -21.2417 403.01 -3070.97 401.533 -3063.62 0.0 401.533 -3063.62 78.7169 -35.1889 -2618.559 12.4099 12.4099
5 8 -6.5107684 0.0 -35.6181 6.87772 -20.9007 403.01 -3070.97 401.521 -3065.07 0.0 401.521 -3065.07 82.3528 -35.6181 -2616.8145 17.9316 17.9316
6 0 -6.3150015 0.0 -28.4378 6.7402 -16.9773 403.01 -3070.97 401.722 -3069.57 0.0 401.722 -3069.57 62.7871 -28.4378 -2633.4988 0.321219 0.321219
6 1 -6.2039247 0.0 -26.1901 6.73978 -16.2949 403.01 -3070.97 401.717 -3070.54 0.0 401.717 -3070.54 61.9335 -26.1901 -2633.0796 0.523887 0.523887
6 2 -6.300015 0.0 -29.4482 6.72323 -19.3557 403.01 -3070.97 401.691 -3070.12 0.0 401.691 -3070.12 65.019 -29.4482 -2632.8584 0.666101 0.666101
6 3 -6.3155546 0.0 -27.9664 6.75049 -16.6294 403.01 -3070.97 401.907 -3070.23 0.0 401.907 -3070.23 65.0847 -27.9664 -2631.2046 4.19021 4.19021
6 4 -6.357522 0.0 -29.3055 6.74418 -16.4034 403.01 -3070.97 401.875 -3068.58 0.0 401.875 -3068.58 65.4106 -29.3055 -2630.6 4.16131 4.16131
6 5 -6.808719 0.0 -38.0771 6.76433 -19.6183 403.01 -3070.97 401.456 -3064.93 0.0 401.456 -3064.93 71.1521 -38.0771 -2630.399 3.1255 3.1255
6 6 -6.3736005 0.0 -29.8061 6.88017 -19.4445 403.01 -3070.97 401.791 -3070.77 0.0 401.791 -3070.77 75.8718 -29.8061 -2622.9133 9.39786 9.39786
6 7 -6.363314 0.0 -30.3739 6.91104 -19.9005 403.01 -3070.97 401.77 -3070.1 0.0 401.77 -3070.1 76.2939 -30.3739 -2622.4102 9.66157 9.66157
7 0 -6.1613474 0.0 -26.0307 6.66304 -16.1516 403.01 -3070.97 403.641 -3073.04 0.0 403.641 -3073.04 62.3289 -26.0307 -2633.101 6.39468 6.39468
7 1 -6.1613474 0.0 -26.0307 6.66304 -16.1516 403.01 -3070.97 403.641 -3073.04 0.0 403.641 -3073.04 62.3289 -26.0307 -2633.101 6.39468 6.39468
7 2 -6.1613474 0.0 -26.0307 6.66304 -16.1516 403.01 -3070.97 403.641 -3073.04 0.0 403.641 -3073.04 62.3289 -26.0307 -2633.101 6.39468 6.39468
7 3 -6.1613474 0.0 -26.0307 6.66304 -16.1516 403.01 -3070.97 403.641 -3073.04 0.0 403.641 -3073.04 62.3289 -26.0307 -2633.101 6.39468 6.39468
7 4 -6.163172 0.0 -26.0872 6.66577 -16.2064 403.01 -3070.97 403.639 -3073.03 0.0 403.639 -3073.03 62.4551 -26.0872 -2633.0232 6.42786 6.42786
7 5 -6.163172 0.0 -26.0872 6.66577 -16.2064 403.01 -3070.97 403.639 -3073.03 0.0 403.639 -3073.03 62.4551 -26.0872 -2633.0232 6.42786 6.42786
7 6 -6.163172 0.0 -26.0872 6.66577 -16.2064 403.01 -3070.97 403.639 -3073.03 0.0 403.639 -3073.03 62.4551 -26.0872 -2633.0232 6.42786 6.42786
7 7 -6.1623745 0.0 -26.0589 6.66104 -16.1722 403.01 -3070.97 403.643 -3073.04 0.0 403.643 -3073.04 62.4644 -26.0589 -2632.9915 6.40795 6.40795
8 0 -6.175328 0.0 -26.8738 6.77864 -16.4228 403.01 -3070.97 403.002 -3071.07 0.0 403.002 -3071.07 61.9025 -26.8738 -2633.0393 3.89451 3.89451
8 1 -6.151537 0.0 -26.755 6.7543 -17.078 403.01 -3070.97 402.997 -3071.55 0.0 402.997 -3071.55 62.5255 -26.755 -2632.7825 3.97354 3.97354
8 2 -5.8299346 0.0 -23.1964 6.76744 -19.4714 403.01 -3070.97 403.36 -3074.73 0.0 403.36 -3074.73 64.4042 -23.1964 -2630.162 5.3267 5.3267
8 3 -5.835804 0.0 -23.268 6.76607 -19.4409 403.01 -3070.97 403.362 -3074.69 0.0 403.362 -3074.69 64.442 -23.268 -2630.1538 5.3582 5.3582
8 4 -5.8254232 0.0 -23.1477 6.77328 -19.3095 403.01 -3070.97 403.392 -3074.61 0.0 403.392 -3074.61 64.4108 -23.1477 -2629.9548 5.51426 5.51426
8 5 -5.955464 0.0 -25.314 6.72657 -17.3663 403.01 -3070.97 403.078 -3071.03 0.0 403.078 -3071.03 63.9813 -25.314 -2629.2847 5.66334 5.66334
8 6 -5.8107567 0.0 -24.8553 6.81886 -19.6111 403.01 -3070.97 403.52 -3072.16 0.0 403.52 -3072.16 66.3466 -24.8553 -2627.1487 7.43287 7.43287
8 7 -5.6773186 0.0 -22.9014 6.795 -17.8112 403.01 -3070.97 403.315 -3070.92 0.0 403.315 -3070.92 71.7451 -22.9014 -2618.7612 13.2509 13.2509
9 0 -6.0666165 0.0 -26.1684 6.79944 -15.7443 403.01 -3070.97 403.278 -3070.1 0.0 403.278 -3070.1 59.9579 -26.1684 -2633.0325 2.74645 2.74645
9 1 -6.074115 0.0 -26.2727 6.7887 -15.6393 403.01 -3070.97 403.205 -3069.86 0.0 403.205 -3069.86 59.987 -26.2727 -2632.9407 2.88019 2.88019
9 2 -6.074115 0.0 -26.2727 6.7887 -15.6393 403.01 -3070.97 403.205 -3069.86 0.0 403.205 -3069.86 59.987 -26.2727 -2632.9407 2.88019 2.88019
9 3 -6.074115 0.0 -26.2727 6.7887 -15.6393 403.01 -3070.97 403.205 -3069.86 0.0 403.205 -3069.86 59.987 -26.2727 -2632.9407 2.88019 2.88019
9 4 -5.97557 0.0 -24.8805 6.68066 -15.0234 403.01 -3070.97 403.119 -3069.82 0.0 403.119 -3069.82 59.4448 -24.8805 -2632.137 2.27622 2.27622
9 5 -6.5727344 0.0 -35.8875 6.47397 -18.7547 403.01 -3070.97 403.362 -3066.99 0.0 403.362 -3066.99 69.9908 -35.8875 -2629.5247 7.16523 7.16523
9 6 -6.5689373 0.0 -35.8657 6.47304 -18.7633 403.01 -3070.97 403.335 -3066.93 0.0 403.335 -3066.93 69.9662 -35.8657 -2629.4944 7.15466 7.15466
9 7 -6.5850058 0.0 -36.0112 6.46494 -18.738 403.01 -3070.97 403.429 -3067.1 0.0 403.429 -3067.1 70.2089 -36.0112 -2629.4734 7.28585 7.28585
9 8 -5.970369 0.0 -24.7079 6.51522 -15.4072 403.01 -3070.97 403.118 -3070.64 0.0 403.118 -3070.64 64.772 -24.7079 -2627.4578 6.55415 6.55415
9 9 -6.2299957 0.0 -29.4692 6.58668 -17.7939 403.01 -3070.97 403.106 -3069.78 0.0 403.106 -3069.78 69.9055 -29.4692 -2626.2378 8.21647 8.21647
9 10 -6.2130365 0.0 -29.2851 6.58934 -17.7736 403.01 -3070.97 403.104 -3069.76 0.0 403.104 -3069.76 69.7179 -29.2851 -2626.2231 8.18105 8.18105
9 11 -5.9726267 0.0 -28.16 6.52397 -19.0853 403.01 -3070.97 403.865 -3070.16 0.0 403.865 -3070.16 71.1591 -28.16 -2623.296 8.83096 8.83096
9 12 -5.8997707 0.0 -26.1604 6.5231 -19.7181 403.01 -3070.97 403.875 -3072.71 0.0 403.875 -3072.71 72.7475 -26.1604 -2622.2478 9.88024 9.88024
10 0 -6.1869564 0.0 -24.0861 6.72223 -18.5408 403.01 -3070.97 402.831 -3077.51 0.0 402.831 -3077.51 65.7729 -24.0861 -2632.9922 3.73362 3.73362
10 1 -6.1869564 0.0 -24.0861 6.72223 -18.5408 403.01 -3070.97 402.831 -3077.51 0.0 402.831 -3077.51 65.7729 -24.0861 -2632.9922 3.73362 3.73362
10 2 -6.100583 0.0 -23.0495 6.72216 -18.3357 403.01 -3070.97 402.853 -3077.53 0.0 402.853 -3077.53 65.4354 -23.0495 -2632.291 4.78294 4.78294
10 3 -6.039462 0.0 -22.4951 6.7318 -18.2853 403.01 -3070.97 402.877 -3077.36 0.0 402.877 -3077.36 65.2576 -22.4951 -2631.7207 5.02484 5.02484
10 4 -6.039462 0.0 -22.4951 6.7318 -18.2853 403.01 -3070.97 402.877 -3077.36 0.0 402.877 -3077.36 65.2576 -22.4951 -2631.7207 5.02484 5.02484
10 5 -6.039462 0.0 -22.4951 6.7318 -18.2853 403.01 -3070.97 402.877 -3077.36 0.0 402.877 -3077.36 65.2576 -22.4951 -2631.7207 5.02484 5.02484
10 6 -6.039462 0.0 -22.4951 6.7318 -18.2853 403.01 -3070.97 402.877 -3077.36 0.0 402.877 -3077.36 65.2576 -22.4951 -2631.7207 5.02484 5.02484
10 7 -6.039462 0.0 -22.4951 6.7318 -18.2853 403.01 -3070.97 402.877 -3077.36 0.0 402.877 -3077.36 65.2576 -22.4951 -2631.7207 5.02484 5.02484
11 0 -7.141992 0.0 -48.3704 6.63268 -20.1265 403.01 -3070.97 401.937 -3055.92 0.0 401.937 -3055.92 69.6642 -48.3704 -2632.6892 0.14169 0.14169
12 0 -6.392728 0.0 -31.5576 6.60213 -18.2304 403.01 -3070.97 402.735 -3069.05 0.0 402.735 -3069.05 65.4222 -31.5576 -2632.4507 0.94514 0.94514
12 1 -6.326938 0.0 -30.0349 6.6231 -17.8428 403.01 -3070.97 402.71 -3069.87 0.0 402.71 -3069.87 65.07 -30.0349 -2632.125 2.70884 2.70884
12 2 -6.2849436 0.0 -29.6231 6.65372 -18.0125 403.01 -3070.97 402.831 -3070.13 0.0 402.831 -3070.13 64.9599 -29.6231 -2631.962 2.91197 2.91197
12 3 -6.2849436 0.0 -29.6231 6.65372 -18.0125 403.01 -3070.97 402.831 -3070.13 0.0 402.831 -3070.13 64.9599 -29.6231 -2631.962 2.91197 2.91197
12 4 -6.7690635 0.0 -35.0183 6.70139 -19.5971 403.01 -3070.97 403.037 -3071.53 0.0 403.037 -3071.53 74.848 -35.0183 -2628.6636 9.31563 9.31563
12 5 -6.1966715 0.0 -28.2887 6.64545 -16.5897 403.01 -3070.97 402.818 -3069.32 0.0 402.818 -3069.32 68.9655 -28.2887 -2625.8252 7.59257 7.59257
12 6 -6.494223 0.0 -32.0523 6.62947 -17.2266 403.01 -3070.97 402.62 -3068.72 0.0 402.62 -3068.72 72.4596 -32.0523 -2625.6929 7.80197 7.80197
12 7 -6.1211686 0.0 -26.6305 6.82544 -18.5219 403.01 -3070.97 403.068 -3072.69 0.0 403.068 -3072.69 71.0817 -26.6305 -2625.171 8.51059 8.51059
12 8 -6.259742 0.0 -27.611 6.73544 -16.9473 403.01 -3070.97 402.652 -3071.36 0.0 402.652 -3071.36 71.2068 -27.611 -2625.1123 9.26645 9.26645
12 9 -6.259742 0.0 -27.611 6.73544 -16.9473 403.01 -3070.97 402.652 -3071.36 0.0 402.652 -3071.36 71.2068 -27.611 -2625.1123 9.26645 9.26645
12 10 -6.3549366 0.0 -30.3561 6.6729 -17.6327 403.01 -3070.97 402.591 -3069.36 0.0 402.591 -3069.36 72.4421 -30.3561 -2624.683 8.65692 8.65692
12 11 -5.9451175 0.0 -23.9894 6.55266 -16.6989 403.01 -3070.97 402.787 -3072.06 0.0 402.787 -3072.06 70.6903 -23.9894 -2622.5723 11.0607 11.0607
13 0 -6.3664145 0.0 -30.8687 6.49266 -17.2981 403.01 -3070.97 402.572 -3068.67 0.0 402.572 -3068.67 64.6426 -30.8687 -2632.324 5.70382 5.70382
13 1 -6.413326 0.0 -32.4139 6.50418 -18.0153 403.01 -3070.97 402.632 -3067.84 0.0 402.632 -3067.84 66.6552 -32.4139 -2630.9668 6.54621 6.54621
13 2 -5.9708047 0.0 -27.0266 6.50091 -17.6207 403.01 -3070.97 402.265 -3067.98 0.0 402.265 -3067.98 63.1802 -27.0266 -2629.5615 6.8678 6.8678
13 3 -6.040463 0.0 -29.7835 6.4943 -19.7713 403.01 -3070.97 402.299 -3067.07 0.0 402.299 -3067.07 68.4065 -29.7835 -2626.148 8.46967 8.46967
13 4 -5.7877297 0.0 -25.8397 6.70618 -20.5989 403.01 -3070.97 402.353 -3069.62 0.0 402.353 -3069.62 68.396 -25.8397 -2624.7107 10.7657 10.7657
13 5 -6.289047 0.0 -31.8254 6.72839 -19.8465 403.01 -3070.97 402.248 -3067.61 0.0 402.248 -3067.61 72.8549 -31.8254 -2624.3325 9.76885 9.76885
13 6 -6.2211494 0.0 -32.2334 6.61369 -21.6888 403.01 -3070.97 402.52 -3068.31 0.0 402.52 -3068.31 73.9693 -32.2334 -2624.0542 13.1753 13.1753
13 7 -5.790225 0.0 -25.3563 6.70052 -19.9081 403.01 -3070.97 402.142 -3069.4 0.0 402.142 -3069.4 70.7944 -25.3563 -2621.8198 13.0084 13.0084
14 0 -6.0700836 0.0 -27.6961 6.77271 -19.5846 403.01 -3070.97 403.901 -3072.64 0.0 403.901 -3072.64 64.132 -27.6961 -2632.3032 4.92243 4.92243
14 1 -6.06245 0.0 -27.5391 6.7819 -19.5269 403.01 -3070.97 403.839 -3072.59 0.0 403.839 -3072.59 64.2469 -27.5391 -2632.0435 4.8808 4.8808
14 2 -6.06245 0.0 -27.5391 6.7819 -19.5269 403.01 -3070.97 403.839 -3072.59 0.0 403.839 -3072.59 64.2469 -27.5391 -2632.0435 4.8808 4.8808
14 3 -6.06245 0.0 -27.5391 6.7819 -19.5269 403.01 -3070.97 403.839 -3072.59 0.0 403.839 -3072.59 64.2469 -27.5391 -2632.0435 4.8808 4.8808
14 4 -6.06245 0.0 -27.5391 6.7819 -19.5269 403.01 -3070.97 403.839 -3072.59 0.0 403.839 -3072.59 64.2469 -27.5391 -2632.0435 4.8808 4.8808
14 5 -6.06245 0.0 -27.5391 6.7819 -19.5269 403.01 -3070.97 403.839 -3072.59 0.0 403.839 -3072.59 64.2469 -27.5391 -2632.0435 4.8808 4.8808
14 6 -5.9170923 0.0 -25.5276 6.79939 -20.5052 403.01 -3070.97 403.816 -3074.24 0.0 403.816 -3074.24 65.916 -25.5276 -2630.0356 7.4298 7.4298
14 7 -5.9170923 0.0 -25.5276 6.79939 -20.5052 403.01 -3070.97 403.816 -3074.24 0.0 403.816 -3074.24 65.916 -25.5276 -2630.0356 7.4298 7.4298
15 0 -6.2440476 0.0 -30.2503 6.66983 -16.9376 403.01 -3070.97 402.176 -3066.38 0.0 402.176 -3066.38 62.1866 -30.2503 -2632.2676 5.45748 5.45748
15 1 -6.2440476 0.0 -30.2503 6.66983 -16.9376 403.01 -3070.97 402.176 -3066.38 0.0 402.176 -3066.38 62.1866 -30.2503 -2632.2676 5.45748 5.45748
15 2 -6.2440476 0.0 -30.2503 6.66983 -16.9376 403.01 -3070.97 402.176 -3066.38 0.0 402.176 -3066.38 62.1866 -30.2503 -2632.2676 5.45748 5.45748
15 3 -6.200706 0.0 -29.9777 6.66806 -16.9376 403.01 -3070.97 402.211 -3066.15 0.0 402.211 -3066.15 62.3152 -29.9777 -2631.6016 5.49565 5.49565
15 4 -6.200706 0.0 -29.9777 6.66806 -16.9376 403.01 -3070.97 402.211 -3066.15 0.0 402.211 -3066.15 62.3152 -29.9777 -2631.6016 5.49565 5.49565
15 5 -6.299594 0.0 -31.9142 6.65942 -17.3526 403.01 -3070.97 402.12 -3065.06 0.0 402.12 -3065.06 63.4974 -31.9142 -2631.357 5.79148 5.79148
15 6 -6.299594 0.0 -31.9142 6.65942 -17.3526 403.01 -3070.97 402.12 -3065.06 0.0 402.12 -3065.06 63.4974 -31.9142 -2631.357 5.79148 5.79148
15 7 -6.299594 0.0 -31.9142 6.65942 -17.3526 403.01 -3070.97 402.12 -3065.06 0.0 402.12 -3065.06 63.4974 -31.9142 -2631.357 5.79148 5.79148
16 0 -6.9767284 0.0 -39.682 6.71688 -17.9759 403.01 -3070.97 401.666 -3063.95 0.0 401.666 -3063.95 69.7233 -39.682 -2632.2427 4.84734 4.84734
16 1 -6.9523525 0.0 -39.7586 6.71727 -18.1264 403.01 -3070.97 401.664 -3063.58 0.0 401.664 -3063.58 69.954 -39.7586 -2631.7207 5.06075 5.06075
16 2 -6.8502355 0.0 -37.7641 6.7736 -18.4121 403.01 -3070.97 401.649 -3065.17 0.0 401.649 -3065.17 69.5871 -37.7641 -2631.698 4.91334 4.91334
16 3 -6.1736894 0.0 -30.9862 7.03515 -19.2451 403.01 -3070.97 401.532 -3064.84 0.0 401.532 -3064.84 75.4976 -30.9862 -2618.7966 15.5586 15.5586
16 4 -6.1177692 0.0 -30.3868 7.02839 -19.1728 403.01 -3070.97 401.499 -3064.74 0.0 401.499 -3064.74 75.1285 -30.3868 -2618.4993 15.5142 15.5142
16 5 -5.3340106 0.0 -21.74 6.90848 -20.4524 403.01 -3070.97 401.658 -3067.01 0.0 401.658 -3067.01 80.5103 -21.74 -2606.5818 23.0479 23.0479
17 0 -6.3784847 0.0 -33.0564 6.6531 -19.0844 403.01 -3070.97 402.893 -3067.52 0.0 402.893 -3067.52 65.5678 -33.0564 -2632.1155 2.15592 2.15592
17 1 -6.31804 0.0 -32.5923 6.62054 -19.0625 403.01 -3070.97 402.946 -3067.36 0.0 402.946 -3067.36 65.422 -32.5923 -2631.5845 3.06873 3.06873
17 2 -6.696855 0.0 -35.7514 6.87244 -18.8564 403.01 -3070.97 403.107 -3068.32 0.0 403.107 -3068.32 69.4242 -35.7514 -2631.5403 5.88196 5.88196
17 3 -6.583526 0.0 -35.7615 6.5449 -18.8985 403.01 -3070.97 402.964 -3066.78 0.0 402.964 -3066.78 69.1322 -35.7615 -2630.4453 5.67849 5.67849
17 4 -6.579837 0.0 -35.7029 6.5452 -18.8987 403.01 -3070.97 402.964 -3066.81 0.0 402.964 -3066.81 69.1097 -35.7029 -2630.4395 5.68008 5.68008
17 5 -6.195108 0.0 -31.0719 6.6539 -19.1438 403.01 -3070.97 402.984 -3067.79 0.0 402.984 -3067.79 65.7695 -31.0719 -2630.1084 4.01368 4.01368
17 6 -6.5627036 0.0 -35.4002 6.49616 -18.8604 403.01 -3070.97 403.038 -3067.15 0.0 403.038 -3067.15 69.8036 -35.4002 -2629.7085 6.18862 6.18862
17 7 -5.3211217 0.0 -16.6761 7.13482 -20.0411 403.01 -3070.97 402.864 -3075.73 0.0 402.864 -3075.73 74.6371 -16.6761 -2614.905 16.6336 16.6336
18 0 -6.9279976 0.0 -37.9413 6.84423 -20.7246 403.01 -3070.97 402.71 -3070.01 0.0 402.71 -3070.01 73.2478 -37.9413 -2631.9937 4.51066 4.51066
18 1 -6.447312 0.0 -32.5119 6.69388 -20.0795 403.01 -3070.97 402.894 -3070.42 0.0 402.894 -3070.42 69.0368 -32.5119 -2631.001 4.35293 4.35293
18 2 -6.132151 0.0 -27.8427 6.70946 -19.8725 403.01 -3070.97 403.045 -3072.49 0.0 403.045 -3072.49 68.6887 -27.8427 -2628.599 5.6153 5.6153
18 3 -6.103455 0.0 -28.4833 6.74017 -20.4335 403.01 -3070.97 403.178 -3071.75 0.0 403.178 -3071.75 68.7236 -28.4833 -2628.3318 5.89079 5.89079
18 4 -5.6721687 0.0 -22.7324 6.66411 -17.956 403.01 -3070.97 402.853 -3070.73 0.0 402.853 -3070.73 68.3896 -22.7324 -2622.2197 10.2048 10.2048
18 5 -5.626385 0.0 -22.3384 6.65 -18.2726 403.01 -3070.97 402.821 -3070.88 0.0 402.821 -3070.88 68.4242 -22.3384 -2621.9731 10.0932 10.0932
18 6 -5.934805 0.0 -25.5189 6.85442 -18.6122 403.01 -3070.97 403.483 -3072.05 0.0 403.483 -3072.05 76.2081 -25.5189 -2617.878 16.482 16.482
19 0 -6.1133733 0.0 -27.9155 6.73266 -18.4672 403.01 -3070.97 401.635 -3068.45 0.0 401.635 -3068.45 63.0592 -27.9155 -2631.6711 3.6512 3.6512
19 1 -6.1133733 0.0 -27.9155 6.73266 -18.4672 403.01 -3070.97 401.635 -3068.45 0.0 401.635 -3068.45 63.0592 -27.9155 -2631.6711 3.6512 3.6512
19 2 -6.1133733 0.0 -27.9155 6.73266 -18.4672 403.01 -3070.97 401.635 -3068.45 0.0 401.635 -3068.45 63.0592 -27.9155 -2631.6711 3.6512 3.6512
19 3 -6.1133733 0.0 -27.9155 6.73266 -18.4672 403.01 -3070.97 401.635 -3068.45 0.0 401.635 -3068.45 63.0592 -27.9155 -2631.6711 3.6512 3.6512
19 4 -6.0751595 0.0 -27.1718 6.66215 -17.8833 403.01 -3070.97 401.512 -3068.31 0.0 401.512 -3068.31 62.7528 -27.1718 -2631.217 3.7757 3.7757
19 5 -6.0825787 0.0 -29.4818 6.74456 -18.4558 403.01 -3070.97 401.683 -3065.57 0.0 401.683 -3065.57 64.1505 -29.4818 -2629.2183 6.40447 6.40447
19 6 -6.0825787 0.0 -29.4818 6.74456 -18.4558 403.01 -3070.97 401.683 -3065.57 0.0 401.683 -3065.57 64.1505 -29.4818 -2629.2183 6.40447 6.40447
19 7 -6.0825787 0.0 -29.4818 6.74456 -18.4558 403.01 -3070.97 401.683 -3065.57 0.0 401.683 -3065.57 64.1505 -29.4818 -2629.2183 6.40447 6.40447
20 0 -5.905775 0.0 -24.2832 6.85255 -18.0972 403.01 -3070.97 404.05 -3073.85 0.0 404.05 -3073.85 62.4873 -24.2832 -2631.596 4.95486 4.95486
20 1 -5.905775 0.0 -24.2832 6.85255 -18.0972 403.01 -3070.97 404.05 -3073.85 0.0 404.05 -3073.85 62.4873 -24.2832 -2631.596 4.95486 4.95486
20 2 -5.918755 0.0 -24.63 6.84987 -18.1632 403.01 -3070.97 404.046 -3073.59 0.0 404.046 -3073.59 62.6069 -24.63 -2631.5674 4.83999 4.83999
20 3 -5.918755 0.0 -24.63 6.84987 -18.1632 403.01 -3070.97 404.046 -3073.59 0.0 404.046 -3073.59 62.6069 -24.63 -2631.5674 4.83999 4.83999
20 4 -5.918755 0.0 -24.63 6.84987 -18.1632 403.01 -3070.97 404.046 -3073.59 0.0 404.046 -3073.59 62.6069 -24.63 -2631.5674 4.83999 4.83999
20 5 -5.9089937 0.0 -24.5455 6.85126 -18.165 403.01 -3070.97 404.039 -3073.55 0.0 404.039 -3073.55 62.6233 -24.5455 -2631.433 4.81491 4.81491
20 6 -5.9089937 0.0 -24.5455 6.85126 -18.165 403.01 -3070.97 404.039 -3073.55 0.0 404.039 -3073.55 62.6233 -24.5455 -2631.433 4.81491 4.81491
20 7 -5.9089937 0.0 -24.5455 6.85126 -18.165 403.01 -3070.97 404.039 -3073.55 0.0 404.039 -3073.55 62.6233 -24.5455 -2631.433 4.81491 4.81491
21 0 -6.14125 0.0 -26.6332 6.38263 -20.2988 403.01 -3070.97 402.767 -3075.01 0.0 402.767 -3075.01 67.6737 -26.6332 -2631.2024 3.42795 3.42795
21 1 -6.093089 0.0 -26.0857 6.37462 -20.3105 403.01 -3070.97 402.81 -3075.16 0.0 402.81 -3075.16 67.2429 -26.0857 -2631.1926 2.94451 2.94451
21 2 -6.07925 0.0 -25.9603 6.38386 -20.055 403.01 -3070.97 402.805 -3074.85 0.0 402.805 -3074.85 67.015 -25.9603 -2630.9905 2.78391 2.78391
21 3 -6.3790655 0.0 -32.4925 6.5256 -22.4225 403.01 -3070.97 402.669 -3071.59 0.0 402.669 -3071.59 74.3358 -32.4925 -2627.078 8.24501 8.24501
21 4 -5.942892 0.0 -24.2953 6.70647 -19.695 403.01 -3070.97 402.574 -3073.98 0.0 402.574 -3073.98 76.3258 -24.2953 -2619.3755 14.5349 14.5349
22 0 -6.7035747 0.0 -38.6053 6.75836 -17.4463 403.01 -3070.97 402.47 -3061.8 0.0 402.47 -3061.8 66.7526 -38.6053 -2631.1829 3.56615 3.56615
23 0 -6.250011 0.0 -29.8969 6.63302 -16.7882 403.01 -3070.97 402.777 -3067.86 0.0 402.777 -3067.86 63.9918 -29.8969 -2630.988 2.34497 2.34497
23 1 -6.5630417 0.0 -33.4238 6.84613 -18.1207 403.01 -3070.97 403.064 -3068.97 0.0 403.064 -3068.97 69.0796 -33.4238 -2630.2502 4.11677 4.11677
23 2 -5.763078 0.0 -21.9045 6.93041 -16.2048 403.01 -3070.97 403.492 -3072.32 0.0 403.492 -3072.32 61.0612 -21.9045 -2629.6714 4.44665 4.44665
23 3 -6.3854904 0.0 -30.6069 6.80547 -17.2845 403.01 -3070.97 403.006 -3069.56 0.0 403.006 -3069.56 67.6245 -30.6069 -2629.5364 4.4023 4.4023
23 4 -6.7965913 0.0 -36.9246 6.94194 -18.406 403.01 -3070.97 403.121 -3067.6 0.0 403.121 -3067.6 72.4743 -36.9246 -2628.9292 6.14064 6.14064
23 5 -6.5481963 0.0 -34.7701 6.63574 -17.0202 403.01 -3070.97 403.348 -3066.31 0.0 403.348 -3066.31 69.0414 -34.7701 -2628.691 7.28466 7.28466
23 6 -5.7809625 0.0 -23.0573 6.90508 -18.4698 403.01 -3070.97 403.625 -3073.34 0.0 403.625 -3073.34 64.6001 -23.0573 -2628.1724 5.38041 5.38041
23 7 -5.8716984 0.0 -23.4287 6.6358 -16.301 403.01 -3070.97 403.013 -3071.55 0.0 403.013 -3071.55 65.2437 -23.4287 -2626.7222 5.14362 5.14362
23 8 -6.414251 0.0 -34.6448 6.52184 -20.9635 403.01 -3070.97 402.957 -3067.83 0.0 402.957 -3067.83 73.3485 -34.6448 -2626.1694 7.00024 7.00024
23 9 -6.234355 0.0 -30.0783 6.61831 -15.9139 403.01 -3070.97 403.086 -3066.95 0.0 403.086 -3066.95 67.8724 -30.0783 -2626.0698 7.08254 7.08254
23 10 -6.072331 0.0 -27.1378 6.84219 -16.4398 403.01 -3070.97 403.191 -3069.19 0.0 403.191 -3069.19 73.8235 -27.1378 -2619.3132 16.3758 16.3758
24 0 -6.490037 0.0 -34.7246 6.95938 -17.7807 403.01 -3070.97 401.847 -3063.37 0.0 401.847 -3063.37 65.2683 -34.7246 -2630.9795 3.01076 3.01076
24 1 -6.135026 0.0 -28.4805 6.80373 -14.8159 403.01 -3070.97 402.069 -3064.84 0.0 402.069 -3064.84 65.2036 -28.4805 -2626.0479 7.61864 7.61864
24 2 -5.752106 0.0 -22.8566 6.8344 -14.4428 403.01 -3070.97 401.91 -3066.61 0.0 401.91 -3066.61 63.0184 -22.8566 -2624.5383 7.90494 7.90494
24 3 -6.0993543 0.0 -30.031 6.63535 -16.3173 403.01 -3070.97 401.977 -3063.48 0.0 401.977 -3063.48 73.3019 -30.031 -2618.232 14.233 14.233
24 4 -6.0981507 0.0 -28.492 6.60072 -18.5546 403.01 -3070.97 402.171 -3068.43 0.0 402.171 -3068.43 78.896 -28.492 -2615.855 18.1018 18.1018
25 0 -6.5627728 0.0 -40.1255 6.4486 -18.7202 403.01 -3070.97 402.061 -3058.27 0.0 402.061 -3058.27 65.3648 -40.1255 -2630.9697 -0.08664992 -0.08664992
25 1 -5.7566595 0.0 -30.297 6.48205 -17.3054 403.01 -3070.97 402.246 -3059.11 0.0 402.246 -3059.11 63.846 -30.297 -2623.315 5.14133 5.14133
25 2 -5.9981847 0.0 -32.8302 6.65509 -18.9246 403.01 -3070.97 402.102 -3060.27 0.0 402.102 -3060.27 67.7308 -32.8302 -2623.2673 6.04132 6.04132
25 3 -5.726609 0.0 -30.291 6.48791 -17.3636 403.01 -3070.97 402.267 -3058.71 0.0 402.267 -3058.71 63.779 -30.291 -2622.9548 5.01102 5.01102
25 4 -5.652201 0.0 -27.1459 6.57299 -15.918 403.01 -3070.97 402.792 -3061.59 0.0 402.792 -3061.59 69.6999 -27.1459 -2616.2441 13.3434 13.3434
26 0 -6.348586 0.0 -35.8021 6.52891 -16.4664 403.01 -3070.97 401.566 -3058.31 0.0 401.566 -3058.31 61.8249 -35.8021 -2630.7214 1.34565 1.34565
27 0 -6.420651 0.0 -37.317 6.57076 -18.2266 403.01 -3070.97 402.322 -3060.01 0.0 402.322 -3060.01 64.3231 -37.317 -2630.682 2.4125 2.4125
27 1 -6.378251 0.0 -37.3218 6.57264 -20.2567 403.01 -3070.97 402.324 -3061.34 0.0 402.324 -3061.34 67.8231 -37.3218 -2628.515 3.6961 3.6961
27 2 -6.3881693 0.0 -32.74 6.44013 -16.4406 403.01 -3070.97 402.613 -3065.42 0.0 402.613 -3065.42 68.4719 -32.74 -2627.075 8.03739 8.03739
28 0 -6.3118863 0.0 -29.0551 6.80567 -14.767 403.01 -3070.97 402.192 -3066.98 0.0 402.192 -3066.98 63.3499 -29.0551 -2630.4932 4.46375 4.46375
28 1 -6.378392 0.0 -30.3964 6.83022 -15.6961 403.01 -3070.97 402.092 -3066.73 0.0 402.092 -3066.73 65.1831 -30.3964 -2629.8513 4.21711 4.21711
28 2 -5.6266017 0.0 -24.0373 6.70762 -19.4166 403.01 -3070.97 402.302 -3068.51 0.0 402.302 -3068.51 70.0648 -24.0373 -2620.1804 12.0018 12.0018
28 3 -5.5924325 0.0 -20.4749 6.89116 -20.4918 403.01 -3070.97 402.341 -3074.31 0.0 402.341 -3074.31 72.9485 -20.4749 -2619.4954 13.3317 13.3317
28 4 -6.702144 0.0 -40.0408 6.84196 -18.3469 403.01 -3070.97 402.367 -3060.17 0.0 402.367 -3060.17 80.9311 -40.0408 -2616.9126 17.8108 17.8108
28 5 -6.2195683 0.0 -32.624 6.89179 -16.378 403.01 -3070.97 402.229 -3061.49 0.0 402.229 -3061.49 77.4773 -32.624 -2614.4077 19.4594 19.4594
28 6 -6.151291 0.0 -35.2939 6.62343 -19.2336 403.01 -3070.97 402.444 -3059.85 0.0 402.444 -3059.85 78.5926 -35.2939 -2614.1074 20.5497 20.5497
29 0 -6.0794754 0.0 -28.6503 6.9485 -20.5474 403.01 -3070.97 403.235 -3070.98 0.0 403.235 -3070.98 66.2349 -28.6503 -2630.1602 6.611 6.611
29 1 -6.0794754 0.0 -28.6503 6.9485 -20.5474 403.01 -3070.97 403.235 -3070.98 0.0 403.235 -3070.98 66.2349 -28.6503 -2630.1602 6.611 6.611
29 2 -6.1712666 0.0 -30.8506 6.71195 -19.6723 403.01 -3070.97 402.925 -3068.09 0.0 402.925 -3068.09 66.4447 -30.8506 -2629.571 6.76691 6.76691
29 3 -6.1712666 0.0 -30.8506 6.71195 -19.6723 403.01 -3070.97 402.925 -3068.09 0.0 402.925 -3068.09 66.4447 -30.8506 -2629.571 6.76691 6.76691
29 4 -6.1712666 0.0 -30.8506 6.71195 -19.6723 403.01 -3070.97 402.925 -3068.09 0.0 402.925 -3068.09 66.4447 -30.8506 -2629.571 6.76691 6.76691
29 5 -6.1712666 0.0 -30.8506 6.71195 -19.6723 403.01 -3070.97 402.925 -3068.09 0.0 402.925 -3068.09 66.4447 -30.8506 -2629.571 6.76691 6.76691
29 6 -6.0564504 0.0 -29.5992 6.70572 -21.4265 403.01 -3070.97 402.93 -3069.92 0.0 402.93 -3069.92 68.31 -29.5992 -2628.2793 6.84499 6.84499
29 7 -6.0564504 0.0 -29.5992 6.70572 -21.4265 403.01 -3070.97 402.93 -3069.92 0.0 402.93 -3069.92 68.31 -29.5992 -2628.2793 6.84499 6.84499
30 0 -5.7512608 0.0 -17.1188 6.88224 -16.0824 403.01 -3070.97 402.388 -3077.77 0.0 402.388 -3077.77 62.4307 -17.1188 -2630.07 3.99643 3.99643
31 0 -5.816711 0.0 -24.3104 6.49687 -14.0108 403.01 -3070.97 402.985 -3067.17 0.0 402.985 -3067.17 58.4392 -24.3104 -2630.0562 6.13863 6.13863
31 1 -6.11754 0.0 -28.3063 6.90779 -18.0635 403.01 -3070.97 402.347 -3068.34 0.0 402.347 -3068.34 65.1311 -28.3063 -2629.1685 4.7475 4.7475
31 2 -6.088001 0.0 -26.3661 6.76337 -13.8016 403.01 -3070.97 402.329 -3066.79 0.0 402.329 -3066.79 67.575 -26.3661 -2623.252 12.3487 12.3487
31 3 -6.3122363 0.0 -35.8294 6.57753 -18.5854 403.01 -3070.97 402.402 -3061.01 0.0 402.402 -3061.01 71.3789 -35.8294 -2623.0583 9.11267 9.11267
31 4 -5.6360664 0.0 -22.2691 6.44416 -21.706 403.01 -3070.97 402.739 -3074.77 0.0 402.739 -3074.77 71.5327 -22.2691 -2622.7673 11.4906 11.4906
31 5 -6.246955 0.0 -35.9393 6.56526 -20.0623 403.01 -3070.97 402.396 -3061.26 0.0 402.396 -3061.26 72.5422 -35.9393 -2622.2612 9.49486 9.49486
31 6 -5.767237 0.0 -27.2493 6.77619 -20.0786 403.01 -3070.97 402.322 -3066.43 0.0 402.322 -3066.43 72.7226 -27.2493 -2618.6345 13.6512 13.6512
32 0 -5.582983 0.0 -20.4478 6.76328 -14.887 403.01 -3070.97 402.276 -3068.69 0.0 402.276 -3068.69 57.274 -20.4478 -2629.588 4.53942 4.53942
32 1 -5.535111 0.0 -19.745 6.85817 -14.4689 403.01 -3070.97 402.257 -3068.4 0.0 402.257 -3068.4 57.8724 -19.745 -2628.0154 6.85935 6.85935
32 2 -5.9680943 0.0 -30.0503 6.99632 -17.8045 403.01 -3070.97 402.291 -3062.72 0.0 402.291 -3062.72 69.3969 -30.0503 -2621.0823 12.3608 12.3608
32 3 -5.9710097 0.0 -30.3444 7.01657 -17.6886 403.01 -3070.97 402.242 -3062.09 0.0 402.242 -3062.09 69.4395 -30.3444 -2620.753 12.4793 12.4793
32 4 -5.2313128 0.0 -15.5519 6.57683 -18.6715 403.01 -3070.97 402.629 -3075.13 0.0 402.629 -3075.13 68.8636 -15.5519 -2619.1892 13.1834 13.1834
32 5 -5.936272 0.0 -31.2887 7.11782 -21.5969 403.01 -3070.97 402.569 -3064.32 0.0 402.569 -3064.32 82.3377 -31.2887 -2610.702 20.9111 20.9111
32 6 -5.15959 0.0 -19.3827 7.03698 -18.3161 403.01 -3070.97 402.435 -3066.67 0.0 402.435 -3066.67 75.1498 -19.3827 -2608.4678 22.6242 22.6242
33 0 -6.0207343 0.0 -27.0853 6.72088 -17.3583 403.01 -3070.97 402.632 -3068.67 0.0 402.632 -3068.67 63.6111 -27.0853 -2629.512 8.34681 8.34681
33 1 -6.0207343 0.0 -27.0853 6.72088 -17.3583 403.01 -3070.97 402.632 -3068.67 0.0 402.632 -3068.67 63.6111 -27.0853 -2629.512 8.34681 8.34681
33 2 -6.022278 0.0 -27.1328 6.70797 -17.4044 403.01 -3070.97 402.601 -3068.64 0.0 402.601 -3068.64 63.7709 -27.1328 -2629.4006 8.40418 8.40418
33 3 -6.022278 0.0 -27.1328 6.70797 -17.4044 403.01 -3070.97 402.601 -3068.64 0.0 402.601 -3068.64 63.7709 -27.1328 -2629.4006 8.40418 8.40418
33 4 -6.016422 0.0 -27.2041 6.69282 -17.4006 403.01 -3070.97 402.547 -3068.37 0.0 402.547 -3068.37 63.7692 -27.2041 -2629.2578 8.37872 8.37872
33 5 -6.016422 0.0 -27.2041 6.69282 -17.4006 403.01 -3070.97 402.547 -3068.37 0.0 402.547 -3068.37 63.7692 -27.2041 -2629.2578 8.37872 8.37872
33 6 -6.016422 0.0 -27.2041 6.69282 -17.4006 403.01 -3070.97 402.547 -3068.37 0.0 402.547 -3068.37 63.7692 -27.2041 -2629.2578 8.37872 8.37872
33 7 -6.016422 0.0 -27.2041 6.69282 -17.4006 403.01 -3070.97 402.547 -3068.37 0.0 402.547 -3068.37 63.7692 -27.2041 -2629.2578 8.37872 8.37872
34 0 -6.689341 0.0 -40.8546 6.4801 -18.7627 403.01 -3070.97 401.909 -3058.97 0.0 401.909 -3058.97 68.6187 -40.8546 -2629.2969 2.57513 2.57513
34 1 -6.4494753 0.0 -38.1231 6.515 -20.1041 403.01 -3070.97 402.407 -3061.33 0.0 402.407 -3061.33 71.4707 -38.1231 -2625.5754 8.43569 8.43569
34 2 -5.7327433 0.0 -28.0141 6.46751 -17.1253 403.01 -3070.97 402.718 -3062.82 0.0 402.718 -3062.82 63.2729 -28.0141 -2624.8433 8.00965 8.00965
34 3 -6.66489 0.0 -39.0283 6.53645 -18.1048 403.01 -3070.97 402.117 -3060.97 0.0 402.117 -3060.97 73.9668 -39.0283 -2623.9146 8.57884 8.57884
34 4 -6.5835366 0.0 -40.9154 6.72416 -17.3145 403.01 -3070.97 401.895 -3055.3 0.0 401.895 -3055.3 80.3632 -40.9154 -2613.9573 15.7594 15.7594
35 0 -6.201889 0.0 -28.8872 6.69524 -19.8324 403.01 -3070.97 402.84 -3071.68 0.0 402.84 -3071.68 69.3552 -28.8872 -2628.3718 6.25268 6.25268
36 0 -5.464332 0.0 -16.9028 6.48129 -17.7897 403.01 -3070.97 402.878 -3076.5 0.0 402.878 -3076.5 62.3748 -16.9028 -2628.1501 5.79527 5.79527
37 0 -6.680079 0.0 -35.2449 6.81144 -19.2915 403.01 -3070.97 402.804 -3068.89 0.0 402.804 -3068.89 73.9388 -35.2449 -2627.392 8.59559 8.59559
38 0 -7.0319824 0.0 -49.7775 6.60563 -20.7803 403.01 -3070.97 402.252 -3053.13 0.0 402.252 -3053.13 73.69 -49.7775 -2626.9653 4.74304 4.74304
38 1 -6.9313207 0.0 -46.4791 6.64968 -21.725 403.01 -3070.97 402.213 -3057.4 0.0 402.213 -3057.4 78.7252 -46.4791 -2622.941 8.90864 8.90864
39 0 -5.5308166 0.0 -22.9111 6.45089 -19.6962 403.01 -3070.97 402.844 -3070.2 0.0 402.844 -3070.2 64.9752 -22.9111 -2625.2917 4.86721 4.86721
39 1 -5.72394 0.0 -34.7271 6.62408 -21.4349 403.01 -3070.97 402.778 -3056.46 0.0 402.778 -3056.46 74.1086 -34.7271 -2614.3003 10.085 10.085
39 2 -5.038065 0.0 -28.2885 6.58345 -18.8175 403.01 -3070.97 402.454 -3052.15 0.0 402.454 -3052.15 74.8783 -28.2885 -2603.106 13.149 13.149
40 0 -6.1408634 0.0 -31.5791 6.6024 -16.8683 403.01 -3070.97 401.5 -3061.63 0.0 401.5 -3061.63 66.4799 -31.5791 -2625.229 7.17725 7.17725
40 1 -6.5051327 0.0 -41.0701 6.78033 -21.5548 403.01 -3070.97 401.757 -3057.72 0.0 401.757 -3057.72 78.0915 -41.0701 -2618.9414 12.2394 12.2394
41 0 -5.686662 0.0 -19.441 6.55163 -15.6032 403.01 -3070.97 402.623 -3073.52 0.0 402.623 -3073.52 65.2054 -19.441 -2625.1326 11.2716 11.2716
41 1 -5.845645 0.0 -22.9076 6.55806 -19.2368 403.01 -3070.97 402.537 -3074.25 0.0 402.537 -3074.25 73.0252 -22.9076 -2621.5952 13.2417 13.2417
42 0 -5.631433 0.0 -22.0681 6.58993 -17.3147 403.01 -3070.97 402.559 -3070.11 0.0 402.559 -3070.11 65.1563 -22.0681 -2624.463 7.87413 7.87413
43 0 -6.0334506 0.0 -29.5333 6.7705 -21.559 403.01 -3070.97 402.213 -3068.57 0.0 402.213 -3068.57 73.1917 -29.5333 -2622.6987 11.5428 11.5428
44 0 -6.137253 0.0 -31.9306 6.8881 -16.2489 403.01 -3070.97 401.334 -3059.71 0.0 401.334 -3059.71 67.7602 -31.9306 -2622.5464 10.5615 10.5615
45 0 -6.0200706 0.0 -24.714 6.77118 -16.6258 403.01 -3070.97 403.192 -3072.38 0.0 403.192 -3072.38 72.1951 -24.714 -2621.7068 13.3757 13.3757
46 0 -5.8446236 0.0 -26.935 6.9884 -19.1382 403.01 -3070.97 402.295 -3066.87 0.0 402.295 -3066.87 70.6844 -26.935 -2620.8257 15.2354 15.2354
46 1 -5.9842825 0.0 -30.0013 7.0576 -17.1177 403.01 -3070.97 402.253 -3062.22 0.0 402.253 -3062.22 74.5874 -30.0013 -2615.3809 17.7353 17.7353
47 0 -6.313643 0.0 -32.074 6.86666 -22.0464 403.01 -3070.97 402.569 -3070.11 0.0 402.569 -3070.11 81.4219 -32.074 -2618.193 17.871 17.871
48 0 -5.7163925 0.0 -23.295 6.66665 -19.3925 403.01 -3070.97 402.61 -3071.64 0.0 402.61 -3071.64 80.1646 -23.295 -2612.1602 23.9717 23.9717
49 0 -5.8389688 0.0 -31.4916 6.82735 -22.2898 403.01 -3070.97 402.363 -3063.24 0.0 402.363 -3063.24 81.5385 -31.4916 -2610.83 19.6286 19.6286
50 0 -5.3323946 0.0 -14.786 6.9976 -18.8094 403.01 -3070.97 402.64 -3077.47 0.0 402.64 -3077.47 79.7198 -14.786 -2609.896 24.33 24.33
