# Supplementary material for: Genetic Uniformity of a Specific Region in SARS-CoV-2 Genome and In-Silico Target-Oriented Repurposing of N-Acetyl-D-Glucosamine
Source: Preprints.org preprint supplement (doi:10.20944/preprints202005.0397.v1), 2020-05-24
Supplement: Supplementary file 7 [file supplementary › S6 File/clusters.dock4.pdb]

REMARK  Energy: -0.660215
REMARK  SimpleFitness: -0.660215
REMARK  FullFitness: -2636.946
REMARK  InterFull: -31.0391
REMARK  IntraFull: 64.6761
REMARK  solvFull: -3073.55
REMARK  surfFull: 402.967
REMARK  extraFull: 0.0
REMARK  deltaGcompsolvpol: -3073.55
REMARK  deltaGcompsolvnonpol: 402.967
REMARK  deltaGprotsolvpol: -3070.97
REMARK  deltaGprotsolvnonpol: 403.01
REMARK  deltaGligsolvpol: -19.1642
REMARK  deltaGligsolvnonpol: 6.70309
REMARK  deltaGvdw: -31.0391
REMARK  deltaGelec: 0.0
REMARK  deltaG: -6.549531
REMARK  Cluster: 0
REMARK  ClusterRank: 0
ATOM   9521 C    LIG     1     -27.608  20.927 -53.565  1.00  0.00      LIG  
ATOM   9522 C1   LIG     1     -28.525  19.756 -53.715  1.00  0.00      LIG  
ATOM   9523 O    LIG     1     -28.201  18.745 -54.318  1.00  0.00      LIG  
ATOM   9524 N    LIG     1     -29.731  19.966 -53.088  1.00  0.00      LIG  
ATOM   9525 C2   LIG     1     -30.773  18.950 -53.046  1.00  0.00      LIG  
ATOM   9526 C3   LIG     1     -31.046  18.691 -51.589  1.00  0.00      LIG  
ATOM   9527 O1   LIG     1     -31.713  17.737 -51.218  1.00  0.00      LIG  
ATOM   9528 C4   LIG     1     -32.051  19.356 -53.801  1.00  0.00      LIG  
ATOM   9529 C5   LIG     1     -32.405  20.851 -53.701  1.00  0.00      LIG  
ATOM   9530 C6   LIG     1     -33.743  21.184 -54.371  1.00  0.00      LIG  
ATOM   9531 C7   LIG     1     -34.191  22.618 -54.085  1.00  0.00      LIG  
ATOM   9532 O2   LIG     1     -33.171  23.554 -54.423  1.00  0.00      LIG  
ATOM   9533 O3   LIG     1     -33.669  21.000 -55.785  1.00  0.00      LIG  
ATOM   9534 O4   LIG     1     -32.496  21.224 -52.329  1.00  0.00      LIG  
ATOM   9535 O5   LIG     1     -31.891  18.968 -55.163  1.00  0.00      LIG  
ATOM   9536 H    LIG     1     -26.672  20.712 -54.087  1.00  0.00      LIG  
ATOM   9537 H1   LIG     1     -27.400  21.088 -52.504  1.00  0.00      LIG  
ATOM   9538 H2   LIG     1     -28.068  21.820 -53.998  1.00  0.00      LIG  
ATOM   9539 H3   LIG     1     -29.887  20.849 -52.613  1.00  0.00      LIG  
ATOM   9540 H4   LIG     1     -30.381  18.015 -53.459  1.00  0.00      LIG  
ATOM   9541 H5   LIG     1     -30.945  19.560 -50.919  1.00  0.00      LIG  
ATOM   9542 H6   LIG     1     -32.893  18.773 -53.415  1.00  0.00      LIG  
ATOM   9543 H7   LIG     1     -31.615  21.442 -54.176  1.00  0.00      LIG  
ATOM   9544 H8   LIG     1     -34.515  20.507 -53.995  1.00  0.00      LIG  
ATOM   9545 H9   LIG     1     -34.427  22.746 -53.025  1.00  0.00      LIG  
ATOM   9546 H10  LIG     1     -35.080  22.872 -54.669  1.00  0.00      LIG  
ATOM   9547 H11  LIG     1     -33.101  23.553 -55.392  1.00  0.00      LIG  
ATOM   9548 H12  LIG     1     -32.965  21.587 -56.110  1.00  0.00      LIG  
ATOM   9549 H13  LIG     1     -33.212  20.690 -51.936  1.00  0.00      LIG  
ATOM   9550 H14  LIG     1     -32.627  19.377 -55.655  1.00  0.00      LIG  
TER
REMARK  Energy: 1.88962
REMARK  SimpleFitness: 1.88962
REMARK  FullFitness: -2634.515
REMARK  InterFull: -33.0161
REMARK  IntraFull: 63.5982
REMARK  solvFull: -3068.43
REMARK  surfFull: 403.333
REMARK  extraFull: 0.0
REMARK  deltaGcompsolvpol: -3068.43
REMARK  deltaGcompsolvnonpol: 403.333
REMARK  deltaGprotsolvpol: -3070.97
REMARK  deltaGprotsolvnonpol: 403.01
REMARK  deltaGligsolvpol: -17.2925
REMARK  deltaGligsolvnonpol: 6.64085
REMARK  deltaGvdw: -33.0161
REMARK  deltaGelec: 0.0
REMARK  deltaG: -6.4972405
REMARK  Cluster: 0
REMARK  ClusterRank: 1
ATOM   9521 C    LIG     1     -27.470  21.410 -53.797  1.00  0.00      LIG  
ATOM   9522 C1   LIG     1     -28.601  20.494 -54.135  1.00  0.00      LIG  
ATOM   9523 O    LIG     1     -28.701  19.948 -55.223  1.00  0.00      LIG  
ATOM   9524 N    LIG     1     -29.447  20.289 -53.071  1.00  0.00      LIG  
ATOM   9525 C2   LIG     1     -30.617  19.437 -53.207  1.00  0.00      LIG  
ATOM   9526 C3   LIG     1     -30.796  18.784 -51.858  1.00  0.00      LIG  
ATOM   9527 O1   LIG     1     -31.807  18.177 -51.542  1.00  0.00      LIG  
ATOM   9528 C4   LIG     1     -31.837  20.223 -53.726  1.00  0.00      LIG  
ATOM   9529 C5   LIG     1     -32.862  19.291 -54.375  1.00  0.00      LIG  
ATOM   9530 C6   LIG     1     -34.181  19.978 -54.765  1.00  0.00      LIG  
ATOM   9531 C7   LIG     1     -34.091  20.877 -55.997  1.00  0.00      LIG  
ATOM   9532 O2   LIG     1     -33.386  22.080 -55.714  1.00  0.00      LIG  
ATOM   9533 O3   LIG     1     -35.148  18.966 -55.042  1.00  0.00      LIG  
ATOM   9534 O4   LIG     1     -32.274  18.678 -55.524  1.00  0.00      LIG  
ATOM   9535 O5   LIG     1     -32.450  21.013 -52.700  1.00  0.00      LIG  
ATOM   9536 H    LIG     1     -27.005  21.755 -54.724  1.00  0.00      LIG  
ATOM   9537 H1   LIG     1     -26.735  20.871 -53.194  1.00  0.00      LIG  
ATOM   9538 H2   LIG     1     -27.839  22.280 -53.244  1.00  0.00      LIG  
ATOM   9539 H3   LIG     1     -29.310  20.826 -52.221  1.00  0.00      LIG  
ATOM   9540 H4   LIG     1     -30.352  18.640 -53.909  1.00  0.00      LIG  
ATOM   9541 H5   LIG     1     -29.860  18.536 -51.340  1.00  0.00      LIG  
ATOM   9542 H6   LIG     1     -31.479  20.920 -54.490  1.00  0.00      LIG  
ATOM   9543 H7   LIG     1     -33.097  18.482 -53.679  1.00  0.00      LIG  
ATOM   9544 H8   LIG     1     -34.558  20.554 -53.918  1.00  0.00      LIG  
ATOM   9545 H9   LIG     1     -35.094  21.151 -56.337  1.00  0.00      LIG  
ATOM   9546 H10  LIG     1     -33.605  20.370 -56.834  1.00  0.00      LIG  
ATOM   9547 H11  LIG     1     -33.723  22.408 -54.863  1.00  0.00      LIG  
ATOM   9548 H12  LIG     1     -34.756  18.393 -55.724  1.00  0.00      LIG  
ATOM   9549 H13  LIG     1     -31.391  18.363 -55.265  1.00  0.00      LIG  
ATOM   9550 H14  LIG     1     -32.936  20.398 -52.118  1.00  0.00      LIG  
TER
REMARK  Energy: 2.24202
REMARK  SimpleFitness: 2.24202
REMARK  FullFitness: -2634.2869
REMARK  InterFull: -30.1129
REMARK  IntraFull: 65.4889
REMARK  solvFull: -3072.66
REMARK  surfFull: 402.997
REMARK  extraFull: 0.0
REMARK  deltaGcompsolvpol: -3072.66
REMARK  deltaGcompsolvnonpol: 402.997
REMARK  deltaGprotsolvpol: -3070.97
REMARK  deltaGprotsolvnonpol: 403.01
REMARK  deltaGligsolvpol: -16.4239
REMARK  deltaGligsolvnonpol: 6.73826
REMARK  deltaGvdw: -30.1129
REMARK  deltaGelec: 0.0
REMARK  deltaG: -6.575631
REMARK  Cluster: 0
REMARK  ClusterRank: 2
ATOM   9521 C    LIG     1     -28.016  19.359 -54.023  1.00  0.00      LIG  
ATOM   9522 C1   LIG     1     -28.577  20.539 -53.289  1.00  0.00      LIG  
ATOM   9523 O    LIG     1     -27.943  21.576 -53.185  1.00  0.00      LIG  
ATOM   9524 N    LIG     1     -29.836  20.391 -52.742  1.00  0.00      LIG  
ATOM   9525 C2   LIG     1     -30.729  19.241 -52.867  1.00  0.00      LIG  
ATOM   9526 C3   LIG     1     -31.129  18.861 -51.469  1.00  0.00      LIG  
ATOM   9527 O1   LIG     1     -31.706  17.811 -51.230  1.00  0.00      LIG  
ATOM   9528 C4   LIG     1     -31.964  19.535 -53.741  1.00  0.00      LIG  
ATOM   9529 C5   LIG     1     -32.491  20.983 -53.655  1.00  0.00      LIG  
ATOM   9530 C6   LIG     1     -33.818  21.191 -54.404  1.00  0.00      LIG  
ATOM   9531 C7   LIG     1     -34.290  22.643 -54.330  1.00  0.00      LIG  
ATOM   9532 O2   LIG     1     -34.835  22.962 -53.056  1.00  0.00      LIG  
ATOM   9533 O3   LIG     1     -33.683  20.861 -55.783  1.00  0.00      LIG  
ATOM   9534 O4   LIG     1     -32.682  21.338 -52.288  1.00  0.00      LIG  
ATOM   9535 O5   LIG     1     -31.613  19.210 -55.085  1.00  0.00      LIG  
ATOM   9536 H    LIG     1     -27.020  19.616 -54.392  1.00  0.00      LIG  
ATOM   9537 H1   LIG     1     -28.657  19.105 -54.872  1.00  0.00      LIG  
ATOM   9538 H2   LIG     1     -27.932  18.508 -53.342  1.00  0.00      LIG  
ATOM   9539 H3   LIG     1     -30.197  21.201 -52.249  1.00  0.00      LIG  
ATOM   9540 H4   LIG     1     -30.194  18.376 -53.263  1.00  0.00      LIG  
ATOM   9541 H5   LIG     1     -31.206  19.691 -50.748  1.00  0.00      LIG  
ATOM   9542 H6   LIG     1     -32.775  18.855 -53.462  1.00  0.00      LIG  
ATOM   9543 H7   LIG     1     -31.748  21.661 -54.087  1.00  0.00      LIG  
ATOM   9544 H8   LIG     1     -34.579  20.537 -53.967  1.00  0.00      LIG  
ATOM   9545 H9   LIG     1     -35.062  22.836 -55.080  1.00  0.00      LIG  
ATOM   9546 H10  LIG     1     -33.462  23.326 -54.538  1.00  0.00      LIG  
ATOM   9547 H11  LIG     1     -34.139  22.776 -52.401  1.00  0.00      LIG  
ATOM   9548 H12  LIG     1     -34.517  21.114 -56.215  1.00  0.00      LIG  
ATOM   9549 H13  LIG     1     -33.321  20.699 -51.916  1.00  0.00      LIG  
ATOM   9550 H14  LIG     1     -32.299  19.616 -55.648  1.00  0.00      LIG  
TER
REMARK  Energy: 1.49714
REMARK  SimpleFitness: 1.49714
REMARK  FullFitness: -2634.2751
REMARK  InterFull: -33.1784
REMARK  IntraFull: 63.6132
REMARK  solvFull: -3067.78
REMARK  surfFull: 403.07
REMARK  extraFull: 0.0
REMARK  deltaGcompsolvpol: -3067.78
REMARK  deltaGcompsolvnonpol: 403.07
REMARK  deltaGprotsolvpol: -3070.97
REMARK  deltaGprotsolvnonpol: 403.01
REMARK  deltaGligsolvpol: -16.686
REMARK  deltaGligsolvnonpol: 6.5688
REMARK  deltaGvdw: -33.1784
REMARK  deltaGelec: 0.0
REMARK  deltaG: -6.528002
REMARK  Cluster: 0
REMARK  ClusterRank: 3
ATOM   9521 C    LIG     1     -27.000  20.536 -53.198  1.00  0.00      LIG  
ATOM   9522 C1   LIG     1     -28.165  19.691 -53.601  1.00  0.00      LIG  
ATOM   9523 O    LIG     1     -28.041  18.717 -54.326  1.00  0.00      LIG  
ATOM   9524 N    LIG     1     -29.342  20.108 -53.020  1.00  0.00      LIG  
ATOM   9525 C2   LIG     1     -30.580  19.354 -53.170  1.00  0.00      LIG  
ATOM   9526 C3   LIG     1     -30.810  18.710 -51.822  1.00  0.00      LIG  
ATOM   9527 O1   LIG     1     -31.854  18.157 -51.515  1.00  0.00      LIG  
ATOM   9528 C4   LIG     1     -31.735  20.241 -53.669  1.00  0.00      LIG  
ATOM   9529 C5   LIG     1     -32.828  19.397 -54.330  1.00  0.00      LIG  
ATOM   9530 C6   LIG     1     -34.092  20.188 -54.709  1.00  0.00      LIG  
ATOM   9531 C7   LIG     1     -33.928  21.105 -55.919  1.00  0.00      LIG  
ATOM   9532 O2   LIG     1     -33.148  22.252 -55.605  1.00  0.00      LIG  
ATOM   9533 O3   LIG     1     -35.125  19.253 -55.014  1.00  0.00      LIG  
ATOM   9534 O4   LIG     1     -32.290  18.756 -55.488  1.00  0.00      LIG  
ATOM   9535 O5   LIG     1     -32.292  21.052 -52.628  1.00  0.00      LIG  
ATOM   9536 H    LIG     1     -26.146  20.284 -53.831  1.00  0.00      LIG  
ATOM   9537 H1   LIG     1     -26.751  20.337 -52.152  1.00  0.00      LIG  
ATOM   9538 H2   LIG     1     -27.242  21.594 -53.332  1.00  0.00      LIG  
ATOM   9539 H3   LIG     1     -29.323  20.908 -52.395  1.00  0.00      LIG  
ATOM   9540 H4   LIG     1     -30.396  18.540 -53.876  1.00  0.00      LIG  
ATOM   9541 H5   LIG     1     -29.899  18.431 -51.277  1.00  0.00      LIG  
ATOM   9542 H6   LIG     1     -31.325  20.922 -54.420  1.00  0.00      LIG  
ATOM   9543 H7   LIG     1     -33.126  18.600 -53.645  1.00  0.00      LIG  
ATOM   9544 H8   LIG     1     -34.432  20.771 -53.850  1.00  0.00      LIG  
ATOM   9545 H9   LIG     1     -34.906  21.453 -56.264  1.00  0.00      LIG  
ATOM   9546 H10  LIG     1     -33.468  20.584 -56.762  1.00  0.00      LIG  
ATOM   9547 H11  LIG     1     -33.476  22.589 -54.754  1.00  0.00      LIG  
ATOM   9548 H12  LIG     1     -34.766  18.665 -55.701  1.00  0.00      LIG  
ATOM   9549 H13  LIG     1     -31.473  18.304 -55.214  1.00  0.00      LIG  
ATOM   9550 H14  LIG     1     -32.813  20.460 -52.053  1.00  0.00      LIG  
TER
REMARK  Energy: 6.69424
REMARK  SimpleFitness: 6.69424
REMARK  FullFitness: -2629.7222
REMARK  InterFull: -30.2138
REMARK  IntraFull: 68.9276
REMARK  solvFull: -3071.36
REMARK  surfFull: 402.924
REMARK  extraFull: 0.0
REMARK  deltaGcompsolvpol: -3071.36
REMARK  deltaGcompsolvnonpol: 402.924
REMARK  deltaGprotsolvpol: -3070.97
REMARK  deltaGprotsolvnonpol: 403.01
REMARK  deltaGligsolvpol: -17.1339
REMARK  deltaGligsolvnonpol: 6.84105
REMARK  deltaGvdw: -30.2138
REMARK  deltaGelec: 0.0
REMARK  deltaG: -6.478806
REMARK  Cluster: 0
REMARK  ClusterRank: 4
ATOM   9521 C    LIG     1     -27.453  19.785 -52.610  1.00  0.00      LIG  
ATOM   9522 C1   LIG     1     -28.356  20.841 -53.175  1.00  0.00      LIG  
ATOM   9523 O    LIG     1     -27.973  21.990 -53.317  1.00  0.00      LIG  
ATOM   9524 N    LIG     1     -29.613  20.440 -53.580  1.00  0.00      LIG  
ATOM   9525 C2   LIG     1     -30.173  19.093 -53.576  1.00  0.00      LIG  
ATOM   9526 C3   LIG     1     -30.930  18.938 -52.277  1.00  0.00      LIG  
ATOM   9527 O1   LIG     1     -31.691  18.004 -52.075  1.00  0.00      LIG  
ATOM   9528 C4   LIG     1     -31.053  18.762 -54.806  1.00  0.00      LIG  
ATOM   9529 C5   LIG     1     -31.907  19.892 -55.428  1.00  0.00      LIG  
ATOM   9530 C6   LIG     1     -32.983  20.415 -54.483  1.00  0.00      LIG  
ATOM   9531 C7   LIG     1     -33.811  21.515 -55.139  1.00  0.00      LIG  
ATOM   9532 O2   LIG     1     -34.649  22.138 -54.172  1.00  0.00      LIG  
ATOM   9533 O3   LIG     1     -33.833  19.324 -54.140  1.00  0.00      LIG  
ATOM   9534 O4   LIG     1     -31.109  20.977 -55.902  1.00  0.00      LIG  
ATOM   9535 O5   LIG     1     -30.207  18.234 -55.830  1.00  0.00      LIG  
ATOM   9536 H    LIG     1     -26.596  20.271 -52.137  1.00  0.00      LIG  
ATOM   9537 H1   LIG     1     -27.104  19.133 -53.416  1.00  0.00      LIG  
ATOM   9538 H2   LIG     1     -27.978  19.197 -51.854  1.00  0.00      LIG  
ATOM   9539 H3   LIG     1     -30.202  21.174 -53.965  1.00  0.00      LIG  
ATOM   9540 H4   LIG     1     -29.348  18.378 -53.527  1.00  0.00      LIG  
ATOM   9541 H5   LIG     1     -30.507  19.474 -51.413  1.00  0.00      LIG  
ATOM   9542 H6   LIG     1     -31.727  17.939 -54.554  1.00  0.00      LIG  
ATOM   9543 H7   LIG     1     -32.399  19.478 -56.314  1.00  0.00      LIG  
ATOM   9544 H8   LIG     1     -32.535  20.798 -53.562  1.00  0.00      LIG  
ATOM   9545 H9   LIG     1     -34.453  21.108 -55.925  1.00  0.00      LIG  
ATOM   9546 H10  LIG     1     -33.177  22.295 -55.567  1.00  0.00      LIG  
ATOM   9547 H11  LIG     1     -35.175  21.427 -53.770  1.00  0.00      LIG  
ATOM   9548 H12  LIG     1     -34.147  19.487 -53.231  1.00  0.00      LIG  
ATOM   9549 H13  LIG     1     -30.378  20.572 -56.401  1.00  0.00      LIG  
ATOM   9550 H14  LIG     1     -29.808  17.420 -55.471  1.00  0.00      LIG  
TER
REMARK  Energy: 7.49796
REMARK  SimpleFitness: 7.49796
REMARK  FullFitness: -2627.2986
REMARK  InterFull: -29.7237
REMARK  IntraFull: 70.5762
REMARK  solvFull: -3071.06
REMARK  surfFull: 402.909
REMARK  extraFull: 0.0
REMARK  deltaGcompsolvpol: -3071.06
REMARK  deltaGcompsolvnonpol: 402.909
REMARK  deltaGprotsolvpol: -3070.97
REMARK  deltaGprotsolvnonpol: 403.01
REMARK  deltaGligsolvpol: -17.4775
REMARK  deltaGligsolvnonpol: 6.89528
REMARK  deltaGvdw: -29.7237
REMARK  deltaGelec: 0.0
REMARK  deltaG: -6.399602
REMARK  Cluster: 0
REMARK  ClusterRank: 5
ATOM   9521 C    LIG     1     -27.499  19.646 -52.676  1.00  0.00      LIG  
ATOM   9522 C1   LIG     1     -28.329  20.785 -53.187  1.00  0.00      LIG  
ATOM   9523 O    LIG     1     -27.851  21.894 -53.353  1.00  0.00      LIG  
ATOM   9524 N    LIG     1     -29.640  20.504 -53.512  1.00  0.00      LIG  
ATOM   9525 C2   LIG     1     -30.323  19.214 -53.482  1.00  0.00      LIG  
ATOM   9526 C3   LIG     1     -30.976  19.103 -52.124  1.00  0.00      LIG  
ATOM   9527 O1   LIG     1     -31.769  18.212 -51.862  1.00  0.00      LIG  
ATOM   9528 C4   LIG     1     -31.363  19.008 -54.615  1.00  0.00      LIG  
ATOM   9529 C5   LIG     1     -31.964  20.262 -55.292  1.00  0.00      LIG  
ATOM   9530 C6   LIG     1     -32.781  21.133 -54.337  1.00  0.00      LIG  
ATOM   9531 C7   LIG     1     -33.275  22.406 -55.018  1.00  0.00      LIG  
ATOM   9532 O2   LIG     1     -33.828  23.289 -54.047  1.00  0.00      LIG  
ATOM   9533 O3   LIG     1     -33.912  20.385 -53.899  1.00  0.00      LIG  
ATOM   9534 O4   LIG     1     -30.963  21.048 -55.940  1.00  0.00      LIG  
ATOM   9535 O5   LIG     1     -30.759  18.204 -55.631  1.00  0.00      LIG  
ATOM   9536 H    LIG     1     -26.562  20.044 -52.279  1.00  0.00      LIG  
ATOM   9537 H1   LIG     1     -27.282  18.956 -53.495  1.00  0.00      LIG  
ATOM   9538 H2   LIG     1     -28.021  19.121 -51.872  1.00  0.00      LIG  
ATOM   9539 H3   LIG     1     -30.173  21.294 -53.863  1.00  0.00      LIG  
ATOM   9540 H4   LIG     1     -29.571  18.422 -53.517  1.00  0.00      LIG  
ATOM   9541 H5   LIG     1     -30.455  19.614 -51.299  1.00  0.00      LIG  
ATOM   9542 H6   LIG     1     -32.201  18.406 -54.250  1.00  0.00      LIG  
ATOM   9543 H7   LIG     1     -32.625  19.914 -56.092  1.00  0.00      LIG  
ATOM   9544 H8   LIG     1     -32.201  21.411 -53.452  1.00  0.00      LIG  
ATOM   9545 H9   LIG     1     -34.056  22.183 -55.751  1.00  0.00      LIG  
ATOM   9546 H10  LIG     1     -32.465  22.944 -55.515  1.00  0.00      LIG  
ATOM   9547 H11  LIG     1     -34.426  22.751 -53.500  1.00  0.00      LIG  
ATOM   9548 H12  LIG     1     -33.620  19.810 -53.168  1.00  0.00      LIG  
ATOM   9549 H13  LIG     1     -30.400  20.418 -56.424  1.00  0.00      LIG  
ATOM   9550 H14  LIG     1     -30.400  17.410 -55.194  1.00  0.00      LIG  
TER
REMARK  Energy: 5.61793
REMARK  SimpleFitness: 5.61793
REMARK  FullFitness: -2625.8367
REMARK  InterFull: -21.6179
REMARK  IntraFull: 67.1171
REMARK  solvFull: -3074.15
REMARK  surfFull: 402.814
REMARK  extraFull: 0.0
REMARK  deltaGcompsolvpol: -3074.15
REMARK  deltaGcompsolvnonpol: 402.814
REMARK  deltaGprotsolvpol: -3070.97
REMARK  deltaGprotsolvnonpol: 403.01
REMARK  deltaGligsolvpol: -17.6515
REMARK  deltaGligsolvnonpol: 6.7242
REMARK  deltaGvdw: -21.6179
REMARK  deltaGelec: 0.0
REMARK  deltaG: -5.8040457
REMARK  Cluster: 0
REMARK  ClusterRank: 6
ATOM   9521 C    LIG     1     -27.838  21.465 -53.549  1.00  0.00      LIG  
ATOM   9522 C1   LIG     1     -28.471  20.144 -53.254  1.00  0.00      LIG  
ATOM   9523 O    LIG     1     -27.821  19.153 -52.964  1.00  0.00      LIG  
ATOM   9524 N    LIG     1     -29.839  20.197 -53.385  1.00  0.00      LIG  
ATOM   9525 C2   LIG     1     -30.688  19.026 -53.267  1.00  0.00      LIG  
ATOM   9526 C3   LIG     1     -31.110  18.886 -51.825  1.00  0.00      LIG  
ATOM   9527 O1   LIG     1     -31.255  19.827 -51.058  1.00  0.00      LIG  
ATOM   9528 C4   LIG     1     -31.930  19.052 -54.172  1.00  0.00      LIG  
ATOM   9529 C5   LIG     1     -32.853  20.285 -54.037  1.00  0.00      LIG  
ATOM   9530 C6   LIG     1     -32.648  21.424 -55.051  1.00  0.00      LIG  
ATOM   9531 C7   LIG     1     -33.739  22.489 -54.931  1.00  0.00      LIG  
ATOM   9532 O2   LIG     1     -33.891  22.921 -53.582  1.00  0.00      LIG  
ATOM   9533 O3   LIG     1     -31.387  22.062 -54.870  1.00  0.00      LIG  
ATOM   9534 O4   LIG     1     -34.189  19.822 -54.225  1.00  0.00      LIG  
ATOM   9535 O5   LIG     1     -31.544  18.852 -55.531  1.00  0.00      LIG  
ATOM   9536 H    LIG     1     -26.752  21.350 -53.515  1.00  0.00      LIG  
ATOM   9537 H1   LIG     1     -28.150  22.196 -52.798  1.00  0.00      LIG  
ATOM   9538 H2   LIG     1     -28.131  21.806 -54.546  1.00  0.00      LIG  
ATOM   9539 H3   LIG     1     -30.274  21.087 -53.613  1.00  0.00      LIG  
ATOM   9540 H4   LIG     1     -30.079  18.150 -53.511  1.00  0.00      LIG  
ATOM   9541 H5   LIG     1     -31.457  17.880 -51.541  1.00  0.00      LIG  
ATOM   9542 H6   LIG     1     -32.511  18.160 -53.914  1.00  0.00      LIG  
ATOM   9543 H7   LIG     1     -32.789  20.676 -53.019  1.00  0.00      LIG  
ATOM   9544 H8   LIG     1     -32.677  21.034 -56.072  1.00  0.00      LIG  
ATOM   9545 H9   LIG     1     -34.703  22.103 -55.271  1.00  0.00      LIG  
ATOM   9546 H10  LIG     1     -33.488  23.368 -55.531  1.00  0.00      LIG  
ATOM   9547 H11  LIG     1     -32.995  23.071 -53.235  1.00  0.00      LIG  
ATOM   9548 H12  LIG     1     -31.338  22.774 -55.531  1.00  0.00      LIG  
ATOM   9549 H13  LIG     1     -34.442  19.375 -53.398  1.00  0.00      LIG  
ATOM   9550 H14  LIG     1     -32.359  18.901 -56.060  1.00  0.00      LIG  
TER
REMARK  Energy: 9.54877
REMARK  SimpleFitness: 9.54877
REMARK  FullFitness: -2625.137
REMARK  InterFull: -25.8806
REMARK  IntraFull: 69.3805
REMARK  solvFull: -3072.27
REMARK  surfFull: 403.633
REMARK  extraFull: 0.0
REMARK  deltaGcompsolvpol: -3072.27
REMARK  deltaGcompsolvnonpol: 403.633
REMARK  deltaGprotsolvpol: -3070.97
REMARK  deltaGprotsolvnonpol: 403.01
REMARK  deltaGligsolvpol: -18.4992
REMARK  deltaGligsolvnonpol: 6.82816
REMARK  deltaGvdw: -25.8806
REMARK  deltaGelec: 0.0
REMARK  deltaG: -5.972726
REMARK  Cluster: 0
REMARK  ClusterRank: 7
ATOM   9521 C    LIG     1     -28.081  19.131 -54.298  1.00  0.00      LIG  
ATOM   9522 C1   LIG     1     -28.300  20.320 -53.410  1.00  0.00      LIG  
ATOM   9523 O    LIG     1     -27.377  21.064 -53.124  1.00  0.00      LIG  
ATOM   9524 N    LIG     1     -29.592  20.539 -52.969  1.00  0.00      LIG  
ATOM   9525 C2   LIG     1     -30.751  19.674 -53.180  1.00  0.00      LIG  
ATOM   9526 C3   LIG     1     -30.820  18.834 -51.925  1.00  0.00      LIG  
ATOM   9527 O1   LIG     1     -31.796  18.159 -51.639  1.00  0.00      LIG  
ATOM   9528 C4   LIG     1     -32.060  20.461 -53.365  1.00  0.00      LIG  
ATOM   9529 C5   LIG     1     -31.949  21.691 -54.285  1.00  0.00      LIG  
ATOM   9530 C6   LIG     1     -31.972  21.390 -55.788  1.00  0.00      LIG  
ATOM   9531 C7   LIG     1     -31.853  22.689 -56.584  1.00  0.00      LIG  
ATOM   9532 O2   LIG     1     -32.088  22.449 -57.967  1.00  0.00      LIG  
ATOM   9533 O3   LIG     1     -30.883  20.537 -56.141  1.00  0.00      LIG  
ATOM   9534 O4   LIG     1     -33.041  22.564 -53.993  1.00  0.00      LIG  
ATOM   9535 O5   LIG     1     -33.059  19.586 -53.893  1.00  0.00      LIG  
ATOM   9536 H    LIG     1     -27.011  19.044 -54.508  1.00  0.00      LIG  
ATOM   9537 H1   LIG     1     -28.621  19.264 -55.238  1.00  0.00      LIG  
ATOM   9538 H2   LIG     1     -28.413  18.220 -53.795  1.00  0.00      LIG  
ATOM   9539 H3   LIG     1     -29.705  21.328 -52.340  1.00  0.00      LIG  
ATOM   9540 H4   LIG     1     -30.584  18.985 -54.012  1.00  0.00      LIG  
ATOM   9541 H5   LIG     1     -29.849  18.565 -51.483  1.00  0.00      LIG  
ATOM   9542 H6   LIG     1     -32.428  20.798 -52.388  1.00  0.00      LIG  
ATOM   9543 H7   LIG     1     -31.043  22.248 -54.047  1.00  0.00      LIG  
ATOM   9544 H8   LIG     1     -32.899  20.883 -56.072  1.00  0.00      LIG  
ATOM   9545 H9   LIG     1     -30.850  23.115 -56.485  1.00  0.00      LIG  
ATOM   9546 H10  LIG     1     -32.582  23.433 -56.255  1.00  0.00      LIG  
ATOM   9547 H11  LIG     1     -32.883  21.892 -58.022  1.00  0.00      LIG  
ATOM   9548 H12  LIG     1     -30.081  21.086 -56.133  1.00  0.00      LIG  
ATOM   9549 H13  LIG     1     -33.170  22.546 -53.029  1.00  0.00      LIG  
ATOM   9550 H14  LIG     1     -33.264  18.951 -53.182  1.00  0.00      LIG  
TER
REMARK  Energy: 0.420526
REMARK  SimpleFitness: 0.420526
REMARK  FullFitness: -2636.1958
REMARK  InterFull: -33.807
REMARK  IntraFull: 65.0049
REMARK  solvFull: -3070.16
REMARK  surfFull: 402.766
REMARK  extraFull: 0.0
REMARK  deltaGcompsolvpol: -3070.16
REMARK  deltaGcompsolvnonpol: 402.766
REMARK  deltaGprotsolvpol: -3070.97
REMARK  deltaGprotsolvnonpol: 403.01
REMARK  deltaGligsolvpol: -17.2759
REMARK  deltaGligsolvnonpol: 6.62781
REMARK  deltaGvdw: -33.807
REMARK  deltaGelec: 0.0
REMARK  deltaG: -6.7313566
REMARK  Cluster: 1
REMARK  ClusterRank: 0
ATOM   9521 C    LIG     1     -25.324  18.672 -56.593  1.00  0.00      LIG  
ATOM   9522 C1   LIG     1     -25.435  19.529 -55.369  1.00  0.00      LIG  
ATOM   9523 O    LIG     1     -24.454  19.932 -54.763  1.00  0.00      LIG  
ATOM   9524 N    LIG     1     -26.740  19.856 -55.081  1.00  0.00      LIG  
ATOM   9525 C2   LIG     1     -27.094  20.817 -54.040  1.00  0.00      LIG  
ATOM   9526 C3   LIG     1     -27.419  22.134 -54.700  1.00  0.00      LIG  
ATOM   9527 O1   LIG     1     -27.743  22.249 -55.875  1.00  0.00      LIG  
ATOM   9528 C4   LIG     1     -28.260  20.360 -53.147  1.00  0.00      LIG  
ATOM   9529 C5   LIG     1     -29.381  19.586 -53.870  1.00  0.00      LIG  
ATOM   9530 C6   LIG     1     -30.636  19.423 -52.996  1.00  0.00      LIG  
ATOM   9531 C7   LIG     1     -31.708  18.593 -53.694  1.00  0.00      LIG  
ATOM   9532 O2   LIG     1     -32.374  19.334 -54.707  1.00  0.00      LIG  
ATOM   9533 O3   LIG     1     -30.333  18.771 -51.767  1.00  0.00      LIG  
ATOM   9534 O4   LIG     1     -29.767  20.259 -55.068  1.00  0.00      LIG  
ATOM   9535 O5   LIG     1     -27.697  19.556 -52.113  1.00  0.00      LIG  
ATOM   9536 H    LIG     1     -24.358  18.160 -56.578  1.00  0.00      LIG  
ATOM   9537 H1   LIG     1     -25.394  19.301 -57.484  1.00  0.00      LIG  
ATOM   9538 H2   LIG     1     -26.119  17.919 -56.607  1.00  0.00      LIG  
ATOM   9539 H3   LIG     1     -27.461  19.529 -55.714  1.00  0.00      LIG  
ATOM   9540 H4   LIG     1     -26.207  21.003 -53.424  1.00  0.00      LIG  
ATOM   9541 H5   LIG     1     -27.530  22.981 -54.009  1.00  0.00      LIG  
ATOM   9542 H6   LIG     1     -28.701  21.234 -52.656  1.00  0.00      LIG  
ATOM   9543 H7   LIG     1     -29.011  18.591 -54.137  1.00  0.00      LIG  
ATOM   9544 H8   LIG     1     -31.042  20.413 -52.766  1.00  0.00      LIG  
ATOM   9545 H9   LIG     1     -32.460  18.255 -52.978  1.00  0.00      LIG  
ATOM   9546 H10  LIG     1     -31.266  17.700 -54.144  1.00  0.00      LIG  
ATOM   9547 H11  LIG     1     -31.673  19.800 -55.200  1.00  0.00      LIG  
ATOM   9548 H12  LIG     1     -29.982  17.884 -51.983  1.00  0.00      LIG  
ATOM   9549 H13  LIG     1     -28.976  20.692 -55.438  1.00  0.00      LIG  
ATOM   9550 H14  LIG     1     -28.450  19.184 -51.617  1.00  0.00      LIG  
TER
REMARK  Energy: 10.9355
REMARK  SimpleFitness: 10.9355
REMARK  FullFitness: -2621.2864
REMARK  InterFull: -33.306
REMARK  IntraFull: 77.0806
REMARK  solvFull: -3067.76
REMARK  surfFull: 402.699
REMARK  extraFull: 0.0
REMARK  deltaGcompsolvpol: -3067.76
REMARK  deltaGcompsolvnonpol: 402.699
REMARK  deltaGprotsolvpol: -3070.97
REMARK  deltaGprotsolvnonpol: 403.01
REMARK  deltaGligsolvpol: -19.6254
REMARK  deltaGligsolvnonpol: 6.77016
REMARK  deltaGvdw: -33.306
REMARK  deltaGelec: 0.0
REMARK  deltaG: -6.4131017
REMARK  Cluster: 1
REMARK  ClusterRank: 1
ATOM   9521 C    LIG     1     -24.326  20.143 -54.857  1.00  0.00      LIG  
ATOM   9522 C1   LIG     1     -25.537  19.510 -55.475  1.00  0.00      LIG  
ATOM   9523 O    LIG     1     -25.426  18.672 -56.356  1.00  0.00      LIG  
ATOM   9524 N    LIG     1     -26.765  19.891 -54.968  1.00  0.00      LIG  
ATOM   9525 C2   LIG     1     -27.046  20.907 -53.953  1.00  0.00      LIG  
ATOM   9526 C3   LIG     1     -27.580  22.138 -54.641  1.00  0.00      LIG  
ATOM   9527 O1   LIG     1     -28.040  22.156 -55.774  1.00  0.00      LIG  
ATOM   9528 C4   LIG     1     -28.019  20.460 -52.849  1.00  0.00      LIG  
ATOM   9529 C5   LIG     1     -29.508  20.266 -53.215  1.00  0.00      LIG  
ATOM   9530 C6   LIG     1     -29.836  19.018 -54.057  1.00  0.00      LIG  
ATOM   9531 C7   LIG     1     -31.314  18.632 -54.004  1.00  0.00      LIG  
ATOM   9532 O2   LIG     1     -31.641  17.976 -52.785  1.00  0.00      LIG  
ATOM   9533 O3   LIG     1     -29.530  19.275 -55.425  1.00  0.00      LIG  
ATOM   9534 O4   LIG     1     -30.217  20.207 -51.978  1.00  0.00      LIG  
ATOM   9535 O5   LIG     1     -27.509  19.292 -52.202  1.00  0.00      LIG  
ATOM   9536 H    LIG     1     -23.434  19.746 -55.348  1.00  0.00      LIG  
ATOM   9537 H1   LIG     1     -24.282  19.900 -53.791  1.00  0.00      LIG  
ATOM   9538 H2   LIG     1     -24.358  21.227 -54.998  1.00  0.00      LIG  
ATOM   9539 H3   LIG     1     -27.577  19.471 -55.415  1.00  0.00      LIG  
ATOM   9540 H4   LIG     1     -26.114  21.198 -53.469  1.00  0.00      LIG  
ATOM   9541 H5   LIG     1     -27.664  23.025 -53.996  1.00  0.00      LIG  
ATOM   9542 H6   LIG     1     -27.991  21.240 -52.082  1.00  0.00      LIG  
ATOM   9543 H7   LIG     1     -29.869  21.156 -53.736  1.00  0.00      LIG  
ATOM   9544 H8   LIG     1     -29.229  18.175 -53.723  1.00  0.00      LIG  
ATOM   9545 H9   LIG     1     -31.567  17.955 -54.825  1.00  0.00      LIG  
ATOM   9546 H10  LIG     1     -31.948  19.516 -54.109  1.00  0.00      LIG  
ATOM   9547 H11  LIG     1     -31.331  18.568 -52.077  1.00  0.00      LIG  
ATOM   9548 H12  LIG     1     -30.100  20.009 -55.712  1.00  0.00      LIG  
ATOM   9549 H13  LIG     1     -29.683  19.637 -51.395  1.00  0.00      LIG  
ATOM   9550 H14  LIG     1     -26.543  19.388 -52.163  1.00  0.00      LIG  
TER
REMARK  Energy: 4.39314
REMARK  SimpleFitness: 4.39314
REMARK  FullFitness: -2635.7793
REMARK  InterFull: -33.1131
REMARK  IntraFull: 65.194
REMARK  solvFull: -3071.23
REMARK  surfFull: 403.37
REMARK  extraFull: 0.0
REMARK  deltaGcompsolvpol: -3071.23
REMARK  deltaGcompsolvnonpol: 403.37
REMARK  deltaGprotsolvpol: -3070.97
REMARK  deltaGprotsolvnonpol: 403.01
REMARK  deltaGligsolvpol: -18.2037
REMARK  deltaGligsolvnonpol: 6.83544
REMARK  deltaGvdw: -33.1131
REMARK  deltaGelec: 0.0
REMARK  deltaG: -6.6369233
REMARK  Cluster: 2
REMARK  ClusterRank: 0
ATOM   9521 C    LIG     1     -30.256  23.122 -57.275  1.00  0.00      LIG  
ATOM   9522 C1   LIG     1     -31.380  22.824 -56.329  1.00  0.00      LIG  
ATOM   9523 O    LIG     1     -31.868  23.684 -55.611  1.00  0.00      LIG  
ATOM   9524 N    LIG     1     -31.732  21.495 -56.320  1.00  0.00      LIG  
ATOM   9525 C2   LIG     1     -32.735  20.969 -55.408  1.00  0.00      LIG  
ATOM   9526 C3   LIG     1     -33.379  19.776 -56.069  1.00  0.00      LIG  
ATOM   9527 O1   LIG     1     -33.410  19.599 -57.279  1.00  0.00      LIG  
ATOM   9528 C4   LIG     1     -32.173  20.591 -54.025  1.00  0.00      LIG  
ATOM   9529 C5   LIG     1     -30.778  19.948 -54.058  1.00  0.00      LIG  
ATOM   9530 C6   LIG     1     -30.204  19.735 -52.647  1.00  0.00      LIG  
ATOM   9531 C7   LIG     1     -31.096  18.934 -51.699  1.00  0.00      LIG  
ATOM   9532 O2   LIG     1     -31.454  17.662 -52.220  1.00  0.00      LIG  
ATOM   9533 O3   LIG     1     -28.907  19.137 -52.725  1.00  0.00      LIG  
ATOM   9534 O4   LIG     1     -30.831  18.727 -54.797  1.00  0.00      LIG  
ATOM   9535 O5   LIG     1     -32.135  21.756 -53.203  1.00  0.00      LIG  
ATOM   9536 H    LIG     1     -29.323  23.188 -56.709  1.00  0.00      LIG  
ATOM   9537 H1   LIG     1     -30.458  24.076 -57.769  1.00  0.00      LIG  
ATOM   9538 H2   LIG     1     -30.162  22.345 -58.041  1.00  0.00      LIG  
ATOM   9539 H3   LIG     1     -31.244  20.849 -56.933  1.00  0.00      LIG  
ATOM   9540 H4   LIG     1     -33.518  21.725 -55.284  1.00  0.00      LIG  
ATOM   9541 H5   LIG     1     -34.034  19.183 -55.411  1.00  0.00      LIG  
ATOM   9542 H6   LIG     1     -32.876  19.901 -53.548  1.00  0.00      LIG  
ATOM   9543 H7   LIG     1     -30.076  20.599 -54.586  1.00  0.00      LIG  
ATOM   9544 H8   LIG     1     -30.047  20.715 -52.190  1.00  0.00      LIG  
ATOM   9545 H9   LIG     1     -32.011  19.483 -51.478  1.00  0.00      LIG  
ATOM   9546 H10  LIG     1     -30.586  18.749 -50.758  1.00  0.00      LIG  
ATOM   9547 H11  LIG     1     -30.630  17.139 -52.258  1.00  0.00      LIG  
ATOM   9548 H12  LIG     1     -28.992  18.216 -52.413  1.00  0.00      LIG  
ATOM   9549 H13  LIG     1     -29.990  18.268 -54.627  1.00  0.00      LIG  
ATOM   9550 H14  LIG     1     -32.950  22.256 -53.376  1.00  0.00      LIG  
TER
REMARK  Energy: 4.41068
REMARK  SimpleFitness: 4.41068
REMARK  FullFitness: -2635.614
REMARK  InterFull: -32.8984
REMARK  IntraFull: 65.1632
REMARK  solvFull: -3071.21
REMARK  surfFull: 403.331
REMARK  extraFull: 0.0
REMARK  deltaGcompsolvpol: -3071.21
REMARK  deltaGcompsolvnonpol: 403.331
REMARK  deltaGprotsolvpol: -3070.97
REMARK  deltaGprotsolvnonpol: 403.01
REMARK  deltaGligsolvpol: -18.1154
REMARK  deltaGligsolvnonpol: 6.83153
REMARK  deltaGvdw: -32.8984
REMARK  deltaGelec: 0.0
REMARK  deltaG: -6.624111
REMARK  Cluster: 2
REMARK  ClusterRank: 1
ATOM   9521 C    LIG     1     -30.589  23.327 -57.111  1.00  0.00      LIG  
ATOM   9522 C1   LIG     1     -31.676  22.946 -56.151  1.00  0.00      LIG  
ATOM   9523 O    LIG     1     -32.181  23.757 -55.389  1.00  0.00      LIG  
ATOM   9524 N    LIG     1     -31.967  21.603 -56.180  1.00  0.00      LIG  
ATOM   9525 C2   LIG     1     -32.919  21.002 -55.259  1.00  0.00      LIG  
ATOM   9526 C3   LIG     1     -33.548  19.818 -55.951  1.00  0.00      LIG  
ATOM   9527 O1   LIG     1     -33.623  19.698 -57.166  1.00  0.00      LIG  
ATOM   9528 C4   LIG     1     -32.295  20.584 -53.916  1.00  0.00      LIG  
ATOM   9529 C5   LIG     1     -30.884  19.985 -54.025  1.00  0.00      LIG  
ATOM   9530 C6   LIG     1     -30.250  19.733 -52.646  1.00  0.00      LIG  
ATOM   9531 C7   LIG     1     -31.090  18.885 -51.692  1.00  0.00      LIG  
ATOM   9532 O2   LIG     1     -31.460  17.635 -52.250  1.00  0.00      LIG  
ATOM   9533 O3   LIG     1     -28.950  19.154 -52.798  1.00  0.00      LIG  
ATOM   9534 O4   LIG     1     -30.931  18.793 -54.810  1.00  0.00      LIG  
ATOM   9535 O5   LIG     1     -32.261  21.713 -53.046  1.00  0.00      LIG  
ATOM   9536 H    LIG     1     -29.637  23.363 -56.575  1.00  0.00      LIG  
ATOM   9537 H1   LIG     1     -30.818  24.312 -57.526  1.00  0.00      LIG  
ATOM   9538 H2   LIG     1     -30.517  22.609 -57.934  1.00  0.00      LIG  
ATOM   9539 H3   LIG     1     -31.466  21.001 -56.826  1.00  0.00      LIG  
ATOM   9540 H4   LIG     1     -33.721  21.724 -55.073  1.00  0.00      LIG  
ATOM   9541 H5   LIG     1     -34.156  19.174 -55.298  1.00  0.00      LIG  
ATOM   9542 H6   LIG     1     -32.959  19.852 -53.447  1.00  0.00      LIG  
ATOM   9543 H7   LIG     1     -30.221  20.677 -54.552  1.00  0.00      LIG  
ATOM   9544 H8   LIG     1     -30.087  20.698 -52.160  1.00  0.00      LIG  
ATOM   9545 H9   LIG     1     -31.998  19.414 -51.404  1.00  0.00      LIG  
ATOM   9546 H10  LIG     1     -30.534  18.664 -50.785  1.00  0.00      LIG  
ATOM   9547 H11  LIG     1     -30.638  17.112 -52.316  1.00  0.00      LIG  
ATOM   9548 H12  LIG     1     -28.989  18.254 -52.420  1.00  0.00      LIG  
ATOM   9549 H13  LIG     1     -30.079  18.343 -54.671  1.00  0.00      LIG  
ATOM   9550 H14  LIG     1     -33.110  22.178 -53.145  1.00  0.00      LIG  
TER
REMARK  Energy: 5.53515
REMARK  SimpleFitness: 5.53515
REMARK  FullFitness: -2633.3462
REMARK  InterFull: -34.2871
REMARK  IntraFull: 68.9628
REMARK  solvFull: -3071.36
REMARK  surfFull: 403.338
REMARK  extraFull: 0.0
REMARK  deltaGcompsolvpol: -3071.36
REMARK  deltaGcompsolvnonpol: 403.338
REMARK  deltaGprotsolvpol: -3070.97
REMARK  deltaGprotsolvnonpol: 403.01
REMARK  deltaGligsolvpol: -20.4194
REMARK  deltaGligsolvnonpol: 6.83542
REMARK  deltaGvdw: -34.2871
REMARK  deltaGelec: 0.0
REMARK  deltaG: -6.6233706
REMARK  Cluster: 2
REMARK  ClusterRank: 2
ATOM   9521 C    LIG     1     -30.524  23.269 -57.128  1.00  0.00      LIG  
ATOM   9522 C1   LIG     1     -31.617  22.921 -56.164  1.00  0.00      LIG  
ATOM   9523 O    LIG     1     -32.114  23.755 -55.423  1.00  0.00      LIG  
ATOM   9524 N    LIG     1     -31.927  21.581 -56.172  1.00  0.00      LIG  
ATOM   9525 C2   LIG     1     -32.900  21.006 -55.255  1.00  0.00      LIG  
ATOM   9526 C3   LIG     1     -33.538  19.826 -55.946  1.00  0.00      LIG  
ATOM   9527 O1   LIG     1     -33.576  19.681 -57.160  1.00  0.00      LIG  
ATOM   9528 C4   LIG     1     -32.301  20.580 -53.902  1.00  0.00      LIG  
ATOM   9529 C5   LIG     1     -30.877  20.006 -53.991  1.00  0.00      LIG  
ATOM   9530 C6   LIG     1     -30.262  19.739 -52.606  1.00  0.00      LIG  
ATOM   9531 C7   LIG     1     -31.103  18.865 -51.679  1.00  0.00      LIG  
ATOM   9532 O2   LIG     1     -31.460  17.625 -52.267  1.00  0.00      LIG  
ATOM   9533 O3   LIG     1     -28.952  19.180 -52.746  1.00  0.00      LIG  
ATOM   9534 O4   LIG     1     -30.892  18.827 -54.797  1.00  0.00      LIG  
ATOM   9535 O5   LIG     1     -32.322  21.701 -53.021  1.00  0.00      LIG  
ATOM   9536 H    LIG     1     -29.573  23.306 -56.591  1.00  0.00      LIG  
ATOM   9537 H1   LIG     1     -30.741  24.247 -57.565  1.00  0.00      LIG  
ATOM   9538 H2   LIG     1     -30.458  22.532 -57.936  1.00  0.00      LIG  
ATOM   9539 H3   LIG     1     -31.431  20.962 -56.805  1.00  0.00      LIG  
ATOM   9540 H4   LIG     1     -33.693  21.742 -55.087  1.00  0.00      LIG  
ATOM   9541 H5   LIG     1     -34.178  19.206 -55.299  1.00  0.00      LIG  
ATOM   9542 H6   LIG     1     -32.964  19.832 -53.458  1.00  0.00      LIG  
ATOM   9543 H7   LIG     1     -30.214  20.717 -54.492  1.00  0.00      LIG  
ATOM   9544 H8   LIG     1     -30.121  20.698 -52.103  1.00  0.00      LIG  
ATOM   9545 H9   LIG     1     -32.017  19.382 -51.389  1.00  0.00      LIG  
ATOM   9546 H10  LIG     1     -30.553  18.628 -50.771  1.00  0.00      LIG  
ATOM   9547 H11  LIG     1     -30.635  17.105 -52.327  1.00  0.00      LIG  
ATOM   9548 H12  LIG     1     -28.992  18.262 -52.415  1.00  0.00      LIG  
ATOM   9549 H13  LIG     1     -30.036  18.387 -54.652  1.00  0.00      LIG  
ATOM   9550 H14  LIG     1     -32.159  21.363 -52.124  1.00  0.00      LIG  
TER
REMARK  Energy: 12.3333
REMARK  SimpleFitness: 12.3333
REMARK  FullFitness: -2629.0212
REMARK  InterFull: -36.6501
REMARK  IntraFull: 73.5577
REMARK  solvFull: -3069.53
REMARK  surfFull: 403.601
REMARK  extraFull: 0.0
REMARK  deltaGcompsolvpol: -3069.53
REMARK  deltaGcompsolvnonpol: 403.601
REMARK  deltaGprotsolvpol: -3070.97
REMARK  deltaGprotsolvnonpol: 403.01
REMARK  deltaGligsolvpol: -20.268
REMARK  deltaGligsolvnonpol: 6.90967
REMARK  deltaGvdw: -36.6501
REMARK  deltaGelec: 0.0
REMARK  deltaG: -6.7263193
REMARK  Cluster: 2
REMARK  ClusterRank: 3
ATOM   9521 C    LIG     1     -32.454  23.465 -55.214  1.00  0.00      LIG  
ATOM   9522 C1   LIG     1     -31.245  23.328 -56.094  1.00  0.00      LIG  
ATOM   9523 O    LIG     1     -30.739  24.306 -56.621  1.00  0.00      LIG  
ATOM   9524 N    LIG     1     -30.746  22.048 -56.264  1.00  0.00      LIG  
ATOM   9525 C2   LIG     1     -31.306  20.810 -55.725  1.00  0.00      LIG  
ATOM   9526 C3   LIG     1     -32.243  20.252 -56.788  1.00  0.00      LIG  
ATOM   9527 O1   LIG     1     -32.870  20.941 -57.580  1.00  0.00      LIG  
ATOM   9528 C4   LIG     1     -30.179  19.833 -55.303  1.00  0.00      LIG  
ATOM   9529 C5   LIG     1     -30.595  18.926 -54.138  1.00  0.00      LIG  
ATOM   9530 C6   LIG     1     -30.304  19.652 -52.821  1.00  0.00      LIG  
ATOM   9531 C7   LIG     1     -31.208  19.247 -51.666  1.00  0.00      LIG  
ATOM   9532 O2   LIG     1     -31.344  17.832 -51.553  1.00  0.00      LIG  
ATOM   9533 O3   LIG     1     -28.941  19.422 -52.467  1.00  0.00      LIG  
ATOM   9534 O4   LIG     1     -31.977  18.589 -54.238  1.00  0.00      LIG  
ATOM   9535 O5   LIG     1     -29.709  19.033 -56.395  1.00  0.00      LIG  
ATOM   9536 H    LIG     1     -32.744  24.518 -55.186  1.00  0.00      LIG  
ATOM   9537 H1   LIG     1     -32.214  23.134 -54.200  1.00  0.00      LIG  
ATOM   9538 H2   LIG     1     -33.284  22.879 -55.619  1.00  0.00      LIG  
ATOM   9539 H3   LIG     1     -29.966  21.960 -56.907  1.00  0.00      LIG  
ATOM   9540 H4   LIG     1     -31.910  21.033 -54.844  1.00  0.00      LIG  
ATOM   9541 H5   LIG     1     -32.524  19.197 -56.652  1.00  0.00      LIG  
ATOM   9542 H6   LIG     1     -29.306  20.406 -54.974  1.00  0.00      LIG  
ATOM   9543 H7   LIG     1     -30.031  17.991 -54.179  1.00  0.00      LIG  
ATOM   9544 H8   LIG     1     -30.413  20.731 -52.961  1.00  0.00      LIG  
ATOM   9545 H9   LIG     1     -32.198  19.667 -51.830  1.00  0.00      LIG  
ATOM   9546 H10  LIG     1     -30.833  19.630 -50.715  1.00  0.00      LIG  
ATOM   9547 H11  LIG     1     -30.444  17.454 -51.530  1.00  0.00      LIG  
ATOM   9548 H12  LIG     1     -28.844  18.464 -52.312  1.00  0.00      LIG  
ATOM   9549 H13  LIG     1     -32.198  18.108 -53.420  1.00  0.00      LIG  
ATOM   9550 H14  LIG     1     -29.097  18.377 -56.018  1.00  0.00      LIG  
TER
REMARK  Energy: 12.3333
REMARK  SimpleFitness: 12.3333
REMARK  FullFitness: -2629.0212
REMARK  InterFull: -36.6501
REMARK  IntraFull: 73.5577
REMARK  solvFull: -3069.53
REMARK  surfFull: 403.601
REMARK  extraFull: 0.0
REMARK  deltaGcompsolvpol: -3069.53
REMARK  deltaGcompsolvnonpol: 403.601
REMARK  deltaGprotsolvpol: -3070.97
REMARK  deltaGprotsolvnonpol: 403.01
REMARK  deltaGligsolvpol: -20.268
REMARK  deltaGligsolvnonpol: 6.90967
REMARK  deltaGvdw: -36.6501
REMARK  deltaGelec: 0.0
REMARK  deltaG: -6.7263193
REMARK  Cluster: 2
REMARK  ClusterRank: 4
ATOM   9521 C    LIG     1     -32.454  23.465 -55.214  1.00  0.00      LIG  
ATOM   9522 C1   LIG     1     -31.245  23.328 -56.094  1.00  0.00      LIG  
ATOM   9523 O    LIG     1     -30.739  24.306 -56.621  1.00  0.00      LIG  
ATOM   9524 N    LIG     1     -30.746  22.048 -56.264  1.00  0.00      LIG  
ATOM   9525 C2   LIG     1     -31.306  20.810 -55.725  1.00  0.00      LIG  
ATOM   9526 C3   LIG     1     -32.243  20.252 -56.788  1.00  0.00      LIG  
ATOM   9527 O1   LIG     1     -32.870  20.941 -57.580  1.00  0.00      LIG  
ATOM   9528 C4   LIG     1     -30.179  19.833 -55.303  1.00  0.00      LIG  
ATOM   9529 C5   LIG     1     -30.595  18.926 -54.138  1.00  0.00      LIG  
ATOM   9530 C6   LIG     1     -30.304  19.652 -52.821  1.00  0.00      LIG  
ATOM   9531 C7   LIG     1     -31.208  19.247 -51.666  1.00  0.00      LIG  
ATOM   9532 O2   LIG     1     -31.344  17.832 -51.553  1.00  0.00      LIG  
ATOM   9533 O3   LIG     1     -28.941  19.422 -52.467  1.00  0.00      LIG  
ATOM   9534 O4   LIG     1     -31.977  18.589 -54.238  1.00  0.00      LIG  
ATOM   9535 O5   LIG     1     -29.709  19.033 -56.395  1.00  0.00      LIG  
ATOM   9536 H    LIG     1     -32.744  24.518 -55.186  1.00  0.00      LIG  
ATOM   9537 H1   LIG     1     -32.214  23.134 -54.200  1.00  0.00      LIG  
ATOM   9538 H2   LIG     1     -33.284  22.879 -55.619  1.00  0.00      LIG  
ATOM   9539 H3   LIG     1     -29.966  21.960 -56.907  1.00  0.00      LIG  
ATOM   9540 H4   LIG     1     -31.910  21.033 -54.844  1.00  0.00      LIG  
ATOM   9541 H5   LIG     1     -32.524  19.197 -56.652  1.00  0.00      LIG  
ATOM   9542 H6   LIG     1     -29.306  20.406 -54.974  1.00  0.00      LIG  
ATOM   9543 H7   LIG     1     -30.031  17.991 -54.179  1.00  0.00      LIG  
ATOM   9544 H8   LIG     1     -30.413  20.731 -52.961  1.00  0.00      LIG  
ATOM   9545 H9   LIG     1     -32.198  19.667 -51.830  1.00  0.00      LIG  
ATOM   9546 H10  LIG     1     -30.833  19.630 -50.715  1.00  0.00      LIG  
ATOM   9547 H11  LIG     1     -30.444  17.454 -51.530  1.00  0.00      LIG  
ATOM   9548 H12  LIG     1     -28.844  18.464 -52.312  1.00  0.00      LIG  
ATOM   9549 H13  LIG     1     -32.198  18.108 -53.420  1.00  0.00      LIG  
ATOM   9550 H14  LIG     1     -29.097  18.377 -56.018  1.00  0.00      LIG  
TER
REMARK  Energy: 12.903
REMARK  SimpleFitness: 12.903
REMARK  FullFitness: -2628.6428
REMARK  InterFull: -36.59
REMARK  IntraFull: 74.4442
REMARK  solvFull: -3070.0
REMARK  surfFull: 403.503
REMARK  extraFull: 0.0
REMARK  deltaGcompsolvpol: -3070.0
REMARK  deltaGcompsolvnonpol: 403.503
REMARK  deltaGprotsolvpol: -3070.97
REMARK  deltaGprotsolvnonpol: 403.01
REMARK  deltaGligsolvpol: -20.2576
REMARK  deltaGligsolvnonpol: 6.93889
REMARK  deltaGvdw: -36.59
REMARK  deltaGelec: 0.0
REMARK  deltaG: -6.7620697
REMARK  Cluster: 2
REMARK  ClusterRank: 5
ATOM   9521 C    LIG     1     -32.849  23.356 -54.737  1.00  0.00      LIG  
ATOM   9522 C1   LIG     1     -31.726  23.336 -55.734  1.00  0.00      LIG  
ATOM   9523 O    LIG     1     -31.323  24.369 -56.248  1.00  0.00      LIG  
ATOM   9524 N    LIG     1     -31.183  22.098 -56.030  1.00  0.00      LIG  
ATOM   9525 C2   LIG     1     -31.619  20.802 -55.512  1.00  0.00      LIG  
ATOM   9526 C3   LIG     1     -32.641  20.251 -56.498  1.00  0.00      LIG  
ATOM   9527 O1   LIG     1     -33.384  20.946 -57.177  1.00  0.00      LIG  
ATOM   9528 C4   LIG     1     -30.405  19.869 -55.268  1.00  0.00      LIG  
ATOM   9529 C5   LIG     1     -30.644  18.890 -54.113  1.00  0.00      LIG  
ATOM   9530 C6   LIG     1     -30.314  19.594 -52.791  1.00  0.00      LIG  
ATOM   9531 C7   LIG     1     -31.197  19.203 -51.613  1.00  0.00      LIG  
ATOM   9532 O2   LIG     1     -31.327  17.791 -51.468  1.00  0.00      LIG  
ATOM   9533 O3   LIG     1     -28.946  19.342 -52.473  1.00  0.00      LIG  
ATOM   9534 O4   LIG     1     -31.994  18.435 -54.129  1.00  0.00      LIG  
ATOM   9535 O5   LIG     1     -30.022  19.146 -56.444  1.00  0.00      LIG  
ATOM   9536 H    LIG     1     -33.167  24.391 -54.587  1.00  0.00      LIG  
ATOM   9537 H1   LIG     1     -32.507  22.952 -53.780  1.00  0.00      LIG  
ATOM   9538 H2   LIG     1     -33.697  22.775 -55.112  1.00  0.00      LIG  
ATOM   9539 H3   LIG     1     -30.465  22.091 -56.747  1.00  0.00      LIG  
ATOM   9540 H4   LIG     1     -32.132  20.945 -54.560  1.00  0.00      LIG  
ATOM   9541 H5   LIG     1     -32.858  19.177 -56.393  1.00  0.00      LIG  
ATOM   9542 H6   LIG     1     -29.528  20.467 -55.002  1.00  0.00      LIG  
ATOM   9543 H7   LIG     1     -30.007  18.009 -54.238  1.00  0.00      LIG  
ATOM   9544 H8   LIG     1     -30.401  20.676 -52.917  1.00  0.00      LIG  
ATOM   9545 H9   LIG     1     -32.191  19.620 -51.765  1.00  0.00      LIG  
ATOM   9546 H10  LIG     1     -30.804  19.604 -50.678  1.00  0.00      LIG  
ATOM   9547 H11  LIG     1     -30.425  17.417 -51.446  1.00  0.00      LIG  
ATOM   9548 H12  LIG     1     -28.852  18.377 -52.363  1.00  0.00      LIG  
ATOM   9549 H13  LIG     1     -32.116  17.936 -53.301  1.00  0.00      LIG  
ATOM   9550 H14  LIG     1     -29.356  18.494 -56.167  1.00  0.00      LIG  
TER
REMARK  Energy: 12.903
REMARK  SimpleFitness: 12.903
REMARK  FullFitness: -2628.6428
REMARK  InterFull: -36.59
REMARK  IntraFull: 74.4442
REMARK  solvFull: -3070.0
REMARK  surfFull: 403.503
REMARK  extraFull: 0.0
REMARK  deltaGcompsolvpol: -3070.0
REMARK  deltaGcompsolvnonpol: 403.503
REMARK  deltaGprotsolvpol: -3070.97
REMARK  deltaGprotsolvnonpol: 403.01
REMARK  deltaGligsolvpol: -20.2576
REMARK  deltaGligsolvnonpol: 6.93889
REMARK  deltaGvdw: -36.59
REMARK  deltaGelec: 0.0
REMARK  deltaG: -6.7620697
REMARK  Cluster: 2
REMARK  ClusterRank: 6
ATOM   9521 C    LIG     1     -32.849  23.356 -54.737  1.00  0.00      LIG  
ATOM   9522 C1   LIG     1     -31.726  23.336 -55.734  1.00  0.00      LIG  
ATOM   9523 O    LIG     1     -31.323  24.369 -56.248  1.00  0.00      LIG  
ATOM   9524 N    LIG     1     -31.183  22.098 -56.030  1.00  0.00      LIG  
ATOM   9525 C2   LIG     1     -31.619  20.802 -55.512  1.00  0.00      LIG  
ATOM   9526 C3   LIG     1     -32.641  20.251 -56.498  1.00  0.00      LIG  
ATOM   9527 O1   LIG     1     -33.384  20.946 -57.177  1.00  0.00      LIG  
ATOM   9528 C4   LIG     1     -30.405  19.869 -55.268  1.00  0.00      LIG  
ATOM   9529 C5   LIG     1     -30.644  18.890 -54.113  1.00  0.00      LIG  
ATOM   9530 C6   LIG     1     -30.314  19.594 -52.791  1.00  0.00      LIG  
ATOM   9531 C7   LIG     1     -31.197  19.203 -51.613  1.00  0.00      LIG  
ATOM   9532 O2   LIG     1     -31.327  17.791 -51.468  1.00  0.00      LIG  
ATOM   9533 O3   LIG     1     -28.946  19.342 -52.473  1.00  0.00      LIG  
ATOM   9534 O4   LIG     1     -31.994  18.435 -54.129  1.00  0.00      LIG  
ATOM   9535 O5   LIG     1     -30.022  19.146 -56.444  1.00  0.00      LIG  
ATOM   9536 H    LIG     1     -33.167  24.391 -54.587  1.00  0.00      LIG  
ATOM   9537 H1   LIG     1     -32.507  22.952 -53.780  1.00  0.00      LIG  
ATOM   9538 H2   LIG     1     -33.697  22.775 -55.112  1.00  0.00      LIG  
ATOM   9539 H3   LIG     1     -30.465  22.091 -56.747  1.00  0.00      LIG  
ATOM   9540 H4   LIG     1     -32.132  20.945 -54.560  1.00  0.00      LIG  
ATOM   9541 H5   LIG     1     -32.858  19.177 -56.393  1.00  0.00      LIG  
ATOM   9542 H6   LIG     1     -29.528  20.467 -55.002  1.00  0.00      LIG  
ATOM   9543 H7   LIG     1     -30.007  18.009 -54.238  1.00  0.00      LIG  
ATOM   9544 H8   LIG     1     -30.401  20.676 -52.917  1.00  0.00      LIG  
ATOM   9545 H9   LIG     1     -32.191  19.620 -51.765  1.00  0.00      LIG  
ATOM   9546 H10  LIG     1     -30.804  19.604 -50.678  1.00  0.00      LIG  
ATOM   9547 H11  LIG     1     -30.425  17.417 -51.446  1.00  0.00      LIG  
ATOM   9548 H12  LIG     1     -28.852  18.377 -52.363  1.00  0.00      LIG  
ATOM   9549 H13  LIG     1     -32.116  17.936 -53.301  1.00  0.00      LIG  
ATOM   9550 H14  LIG     1     -29.356  18.494 -56.167  1.00  0.00      LIG  
TER
REMARK  Energy: 13.4266
REMARK  SimpleFitness: 13.4266
REMARK  FullFitness: -2626.2021
REMARK  InterFull: -33.9718
REMARK  IntraFull: 75.7257
REMARK  solvFull: -3071.52
REMARK  surfFull: 403.564
REMARK  extraFull: 0.0
REMARK  deltaGcompsolvpol: -3071.52
REMARK  deltaGcompsolvnonpol: 403.564
REMARK  deltaGprotsolvpol: -3070.97
REMARK  deltaGprotsolvnonpol: 403.01
REMARK  deltaGligsolvpol: -21.7471
REMARK  deltaGligsolvnonpol: 6.89898
REMARK  deltaGvdw: -33.9718
REMARK  deltaGelec: 0.0
REMARK  deltaG: -6.506709
REMARK  Cluster: 2
REMARK  ClusterRank: 7
ATOM   9521 C    LIG     1     -32.339  23.561 -55.382  1.00  0.00      LIG  
ATOM   9522 C1   LIG     1     -31.138  23.247 -56.229  1.00  0.00      LIG  
ATOM   9523 O    LIG     1     -30.516  24.136 -56.789  1.00  0.00      LIG  
ATOM   9524 N    LIG     1     -30.792  21.911 -56.340  1.00  0.00      LIG  
ATOM   9525 C2   LIG     1     -31.468  20.772 -55.720  1.00  0.00      LIG  
ATOM   9526 C3   LIG     1     -32.525  20.284 -56.702  1.00  0.00      LIG  
ATOM   9527 O1   LIG     1     -33.059  20.988 -57.549  1.00  0.00      LIG  
ATOM   9528 C4   LIG     1     -30.441  19.683 -55.308  1.00  0.00      LIG  
ATOM   9529 C5   LIG     1     -30.867  18.914 -54.052  1.00  0.00      LIG  
ATOM   9530 C6   LIG     1     -30.468  19.714 -52.814  1.00  0.00      LIG  
ATOM   9531 C7   LIG     1     -31.218  19.311 -51.555  1.00  0.00      LIG  
ATOM   9532 O2   LIG     1     -31.294  17.897 -51.393  1.00  0.00      LIG  
ATOM   9533 O3   LIG     1     -29.065  19.563 -52.601  1.00  0.00      LIG  
ATOM   9534 O4   LIG     1     -32.274  18.679 -54.068  1.00  0.00      LIG  
ATOM   9535 O5   LIG     1     -30.167  18.751 -56.362  1.00  0.00      LIG  
ATOM   9536 H    LIG     1     -32.522  24.637 -55.419  1.00  0.00      LIG  
ATOM   9537 H1   LIG     1     -32.151  23.271 -54.344  1.00  0.00      LIG  
ATOM   9538 H2   LIG     1     -33.220  23.042 -55.768  1.00  0.00      LIG  
ATOM   9539 H3   LIG     1     -30.021  21.705 -56.965  1.00  0.00      LIG  
ATOM   9540 H4   LIG     1     -31.985  21.113 -54.821  1.00  0.00      LIG  
ATOM   9541 H5   LIG     1     -32.968  19.306 -56.462  1.00  0.00      LIG  
ATOM   9542 H6   LIG     1     -29.481  20.160 -55.087  1.00  0.00      LIG  
ATOM   9543 H7   LIG     1     -30.373  17.939 -54.026  1.00  0.00      LIG  
ATOM   9544 H8   LIG     1     -30.652  20.779 -52.979  1.00  0.00      LIG  
ATOM   9545 H9   LIG     1     -32.228  19.705 -51.606  1.00  0.00      LIG  
ATOM   9546 H10  LIG     1     -30.749  19.733 -50.667  1.00  0.00      LIG  
ATOM   9547 H11  LIG     1     -30.394  17.539 -51.514  1.00  0.00      LIG  
ATOM   9548 H12  LIG     1     -28.908  18.623 -52.398  1.00  0.00      LIG  
ATOM   9549 H13  LIG     1     -32.441  18.067 -54.805  1.00  0.00      LIG  
ATOM   9550 H14  LIG     1     -29.560  18.083 -55.998  1.00  0.00      LIG  
TER
REMARK  Energy: -4.94833
REMARK  SimpleFitness: -4.94833
REMARK  FullFitness: -2635.2812
REMARK  InterFull: -39.9049
REMARK  IntraFull: 58.4896
REMARK  solvFull: -3054.31
REMARK  surfFull: 400.444
REMARK  extraFull: 0.0
REMARK  deltaGcompsolvpol: -3054.31
REMARK  deltaGcompsolvnonpol: 400.444
REMARK  deltaGprotsolvpol: -3070.97
REMARK  deltaGprotsolvnonpol: 403.01
REMARK  deltaGligsolvpol: -15.8761
REMARK  deltaGligsolvnonpol: 6.53185
REMARK  deltaGvdw: -39.9049
REMARK  deltaGelec: 0.0
REMARK  deltaG: -6.634457
REMARK  Cluster: 3
REMARK  ClusterRank: 0
ATOM   9521 C    LIG     1     -21.081  32.217 -14.426  1.00  0.00      LIG  
ATOM   9522 C1   LIG     1     -21.729  32.695 -15.684  1.00  0.00      LIG  
ATOM   9523 O    LIG     1     -21.452  33.769 -16.195  1.00  0.00      LIG  
ATOM   9524 N    LIG     1     -22.711  31.837 -16.114  1.00  0.00      LIG  
ATOM   9525 C2   LIG     1     -23.527  32.133 -17.279  1.00  0.00      LIG  
ATOM   9526 C3   LIG     1     -24.102  30.816 -17.748  1.00  0.00      LIG  
ATOM   9527 O1   LIG     1     -24.180  29.811 -17.054  1.00  0.00      LIG  
ATOM   9528 C4   LIG     1     -24.619  33.187 -16.995  1.00  0.00      LIG  
ATOM   9529 C5   LIG     1     -25.344  33.617 -18.274  1.00  0.00      LIG  
ATOM   9530 C6   LIG     1     -26.226  34.850 -18.040  1.00  0.00      LIG  
ATOM   9531 C7   LIG     1     -26.766  35.426 -19.346  1.00  0.00      LIG  
ATOM   9532 O2   LIG     1     -27.390  34.408 -20.123  1.00  0.00      LIG  
ATOM   9533 O3   LIG     1     -27.325  34.539 -17.182  1.00  0.00      LIG  
ATOM   9534 O4   LIG     1     -24.364  33.939 -19.254  1.00  0.00      LIG  
ATOM   9535 O5   LIG     1     -25.566  32.719 -16.025  1.00  0.00      LIG  
ATOM   9536 H    LIG     1     -21.723  32.464 -13.577  1.00  0.00      LIG  
ATOM   9537 H1   LIG     1     -20.115  32.715 -14.318  1.00  0.00      LIG  
ATOM   9538 H2   LIG     1     -20.920  31.134 -14.466  1.00  0.00      LIG  
ATOM   9539 H3   LIG     1     -22.878  30.975 -15.606  1.00  0.00      LIG  
ATOM   9540 H4   LIG     1     -22.842  32.488 -18.055  1.00  0.00      LIG  
ATOM   9541 H5   LIG     1     -24.563  30.838 -18.748  1.00  0.00      LIG  
ATOM   9542 H6   LIG     1     -24.137  34.069 -16.562  1.00  0.00      LIG  
ATOM   9543 H7   LIG     1     -25.951  32.784 -18.641  1.00  0.00      LIG  
ATOM   9544 H8   LIG     1     -25.636  35.626 -17.545  1.00  0.00      LIG  
ATOM   9545 H9   LIG     1     -25.957  35.856 -19.942  1.00  0.00      LIG  
ATOM   9546 H10  LIG     1     -27.514  36.198 -19.146  1.00  0.00      LIG  
ATOM   9547 H11  LIG     1     -27.720  34.839 -20.930  1.00  0.00      LIG  
ATOM   9548 H12  LIG     1     -27.991  34.097 -17.737  1.00  0.00      LIG  
ATOM   9549 H13  LIG     1     -24.817  33.983 -20.116  1.00  0.00      LIG  
ATOM   9550 H14  LIG     1     -26.287  33.376 -16.019  1.00  0.00      LIG  
TER
REMARK  Energy: -4.92277
REMARK  SimpleFitness: -4.92277
REMARK  FullFitness: -2635.1133
REMARK  InterFull: -39.8966
REMARK  IntraFull: 58.5032
REMARK  solvFull: -3054.15
REMARK  surfFull: 400.43
REMARK  extraFull: 0.0
REMARK  deltaGcompsolvpol: -3054.15
REMARK  deltaGcompsolvnonpol: 400.43
REMARK  deltaGprotsolvpol: -3070.97
REMARK  deltaGprotsolvnonpol: 403.01
REMARK  deltaGligsolvpol: -15.8777
REMARK  deltaGligsolvnonpol: 6.53024
REMARK  deltaGvdw: -39.8966
REMARK  deltaGelec: 0.0
REMARK  deltaG: -6.624945
REMARK  Cluster: 3
REMARK  ClusterRank: 1
ATOM   9521 C    LIG     1     -20.987  32.024 -14.641  1.00  0.00      LIG  
ATOM   9522 C1   LIG     1     -21.751  32.632 -15.773  1.00  0.00      LIG  
ATOM   9523 O    LIG     1     -21.452  33.714 -16.254  1.00  0.00      LIG  
ATOM   9524 N    LIG     1     -22.738  31.799 -16.241  1.00  0.00      LIG  
ATOM   9525 C2   LIG     1     -23.585  32.170 -17.362  1.00  0.00      LIG  
ATOM   9526 C3   LIG     1     -24.207  30.888 -17.866  1.00  0.00      LIG  
ATOM   9527 O1   LIG     1     -24.330  29.874 -17.191  1.00  0.00      LIG  
ATOM   9528 C4   LIG     1     -24.640  33.236 -16.994  1.00  0.00      LIG  
ATOM   9529 C5   LIG     1     -25.404  33.743 -18.223  1.00  0.00      LIG  
ATOM   9530 C6   LIG     1     -26.246  34.984 -17.901  1.00  0.00      LIG  
ATOM   9531 C7   LIG     1     -26.822  35.636 -19.155  1.00  0.00      LIG  
ATOM   9532 O2   LIG     1     -27.503  34.672 -19.953  1.00  0.00      LIG  
ATOM   9533 O3   LIG     1     -27.324  34.653 -17.024  1.00  0.00      LIG  
ATOM   9534 O4   LIG     1     -24.461  34.081 -19.233  1.00  0.00      LIG  
ATOM   9535 O5   LIG     1     -25.560  32.747 -16.010  1.00  0.00      LIG  
ATOM   9536 H    LIG     1     -20.588  32.825 -14.013  1.00  0.00      LIG  
ATOM   9537 H1   LIG     1     -20.167  31.426 -15.046  1.00  0.00      LIG  
ATOM   9538 H2   LIG     1     -21.636  31.391 -14.029  1.00  0.00      LIG  
ATOM   9539 H3   LIG     1     -22.888  30.900 -15.794  1.00  0.00      LIG  
ATOM   9540 H4   LIG     1     -22.917  32.542 -18.145  1.00  0.00      LIG  
ATOM   9541 H5   LIG     1     -24.665  30.951 -18.865  1.00  0.00      LIG  
ATOM   9542 H6   LIG     1     -24.120  34.086 -16.543  1.00  0.00      LIG  
ATOM   9543 H7   LIG     1     -26.049  32.942 -18.597  1.00  0.00      LIG  
ATOM   9544 H8   LIG     1     -25.624  35.722 -17.389  1.00  0.00      LIG  
ATOM   9545 H9   LIG     1     -26.029  36.079 -19.763  1.00  0.00      LIG  
ATOM   9546 H10  LIG     1     -27.544  36.414 -18.888  1.00  0.00      LIG  
ATOM   9547 H11  LIG     1     -27.900  35.157 -20.696  1.00  0.00      LIG  
ATOM   9548 H12  LIG     1     -28.014  34.252 -17.583  1.00  0.00      LIG  
ATOM   9549 H13  LIG     1     -24.954  34.164 -20.070  1.00  0.00      LIG  
ATOM   9550 H14  LIG     1     -26.269  33.415 -15.955  1.00  0.00      LIG  
TER
REMARK  Energy: -2.40685
REMARK  SimpleFitness: -2.40685
REMARK  FullFitness: -2631.8584
REMARK  InterFull: -30.5414
REMARK  IntraFull: 62.0261
REMARK  solvFull: -3063.93
REMARK  surfFull: 400.587
REMARK  extraFull: 0.0
REMARK  deltaGcompsolvpol: -3063.93
REMARK  deltaGcompsolvnonpol: 400.587
REMARK  deltaGprotsolvpol: -3070.97
REMARK  deltaGprotsolvnonpol: 403.01
REMARK  deltaGligsolvpol: -16.3788
REMARK  deltaGligsolvnonpol: 6.53346
REMARK  deltaGvdw: -30.5414
REMARK  deltaGelec: 0.0
REMARK  deltaG: -6.293265
REMARK  Cluster: 3
REMARK  ClusterRank: 2
ATOM   9521 C    LIG     1     -20.853  33.035 -15.144  1.00  0.00      LIG  
ATOM   9522 C1   LIG     1     -21.309  32.504 -16.470  1.00  0.00      LIG  
ATOM   9523 O    LIG     1     -20.536  31.981 -17.256  1.00  0.00      LIG  
ATOM   9524 N    LIG     1     -22.670  32.631 -16.661  1.00  0.00      LIG  
ATOM   9525 C2   LIG     1     -23.344  32.125 -17.851  1.00  0.00      LIG  
ATOM   9526 C3   LIG     1     -23.755  30.704 -17.544  1.00  0.00      LIG  
ATOM   9527 O1   LIG     1     -24.697  30.152 -18.094  1.00  0.00      LIG  
ATOM   9528 C4   LIG     1     -24.524  33.003 -18.318  1.00  0.00      LIG  
ATOM   9529 C5   LIG     1     -25.473  33.488 -17.203  1.00  0.00      LIG  
ATOM   9530 C6   LIG     1     -26.654  34.292 -17.768  1.00  0.00      LIG  
ATOM   9531 C7   LIG     1     -27.751  34.517 -16.724  1.00  0.00      LIG  
ATOM   9532 O2   LIG     1     -28.942  34.971 -17.359  1.00  0.00      LIG  
ATOM   9533 O3   LIG     1     -26.200  35.568 -18.217  1.00  0.00      LIG  
ATOM   9534 O4   LIG     1     -25.990  32.358 -16.511  1.00  0.00      LIG  
ATOM   9535 O5   LIG     1     -23.992  34.126 -19.017  1.00  0.00      LIG  
ATOM   9536 H    LIG     1     -20.100  33.809 -15.318  1.00  0.00      LIG  
ATOM   9537 H1   LIG     1     -20.417  32.214 -14.569  1.00  0.00      LIG  
ATOM   9538 H2   LIG     1     -21.681  33.465 -14.572  1.00  0.00      LIG  
ATOM   9539 H3   LIG     1     -23.231  32.996 -15.899  1.00  0.00      LIG  
ATOM   9540 H4   LIG     1     -22.600  32.060 -18.652  1.00  0.00      LIG  
ATOM   9541 H5   LIG     1     -22.987  30.090 -17.045  1.00  0.00      LIG  
ATOM   9542 H6   LIG     1     -25.111  32.438 -19.048  1.00  0.00      LIG  
ATOM   9543 H7   LIG     1     -24.924  34.114 -16.493  1.00  0.00      LIG  
ATOM   9544 H8   LIG     1     -27.080  33.771 -18.631  1.00  0.00      LIG  
ATOM   9545 H9   LIG     1     -27.446  35.277 -15.999  1.00  0.00      LIG  
ATOM   9546 H10  LIG     1     -28.011  33.600 -16.192  1.00  0.00      LIG  
ATOM   9547 H11  LIG     1     -29.577  35.176 -16.652  1.00  0.00      LIG  
ATOM   9548 H12  LIG     1     -25.404  35.396 -18.754  1.00  0.00      LIG  
ATOM   9549 H13  LIG     1     -26.362  31.776 -17.198  1.00  0.00      LIG  
ATOM   9550 H14  LIG     1     -23.202  33.821 -19.501  1.00  0.00      LIG  
TER
REMARK  Energy: 2.31998
REMARK  SimpleFitness: 2.31998
REMARK  FullFitness: -2626.8914
REMARK  InterFull: -43.7335
REMARK  IntraFull: 66.8871
REMARK  solvFull: -3050.5
REMARK  surfFull: 400.455
REMARK  extraFull: 0.0
REMARK  deltaGcompsolvpol: -3050.5
REMARK  deltaGcompsolvnonpol: 400.455
REMARK  deltaGprotsolvpol: -3070.97
REMARK  deltaGprotsolvnonpol: 403.01
REMARK  deltaGligsolvpol: -17.2511
REMARK  deltaGligsolvnonpol: 6.58271
REMARK  deltaGvdw: -43.7335
REMARK  deltaGelec: 0.0
REMARK  deltaG: -6.6830893
REMARK  Cluster: 3
REMARK  ClusterRank: 3
ATOM   9521 C    LIG     1     -21.197  33.599 -16.362  1.00  0.00      LIG  
ATOM   9522 C1   LIG     1     -22.541  32.943 -16.381  1.00  0.00      LIG  
ATOM   9523 O    LIG     1     -23.044  32.494 -15.362  1.00  0.00      LIG  
ATOM   9524 N    LIG     1     -23.038  32.798 -17.662  1.00  0.00      LIG  
ATOM   9525 C2   LIG     1     -24.333  32.200 -17.995  1.00  0.00      LIG  
ATOM   9526 C3   LIG     1     -24.202  30.704 -17.757  1.00  0.00      LIG  
ATOM   9527 O1   LIG     1     -25.154  29.945 -17.669  1.00  0.00      LIG  
ATOM   9528 C4   LIG     1     -25.538  32.937 -17.348  1.00  0.00      LIG  
ATOM   9529 C5   LIG     1     -26.888  32.815 -18.084  1.00  0.00      LIG  
ATOM   9530 C6   LIG     1     -26.842  33.366 -19.512  1.00  0.00      LIG  
ATOM   9531 C7   LIG     1     -28.228  33.471 -20.141  1.00  0.00      LIG  
ATOM   9532 O2   LIG     1     -28.773  32.189 -20.425  1.00  0.00      LIG  
ATOM   9533 O3   LIG     1     -26.266  34.670 -19.500  1.00  0.00      LIG  
ATOM   9534 O4   LIG     1     -27.364  31.469 -18.101  1.00  0.00      LIG  
ATOM   9535 O5   LIG     1     -25.727  32.576 -15.977  1.00  0.00      LIG  
ATOM   9536 H    LIG     1     -21.177  34.449 -17.050  1.00  0.00      LIG  
ATOM   9537 H1   LIG     1     -20.435  32.870 -16.651  1.00  0.00      LIG  
ATOM   9538 H2   LIG     1     -20.995  33.962 -15.351  1.00  0.00      LIG  
ATOM   9539 H3   LIG     1     -22.504  33.211 -18.422  1.00  0.00      LIG  
ATOM   9540 H4   LIG     1     -24.384  32.316 -19.079  1.00  0.00      LIG  
ATOM   9541 H5   LIG     1     -23.215  30.280 -18.004  1.00  0.00      LIG  
ATOM   9542 H6   LIG     1     -25.292  34.001 -17.323  1.00  0.00      LIG  
ATOM   9543 H7   LIG     1     -27.627  33.389 -17.517  1.00  0.00      LIG  
ATOM   9544 H8   LIG     1     -26.225  32.711 -20.132  1.00  0.00      LIG  
ATOM   9545 H9   LIG     1     -28.183  34.036 -21.076  1.00  0.00      LIG  
ATOM   9546 H10  LIG     1     -28.912  34.002 -19.473  1.00  0.00      LIG  
ATOM   9547 H11  LIG     1     -28.580  31.635 -19.646  1.00  0.00      LIG  
ATOM   9548 H12  LIG     1     -26.897  35.257 -19.049  1.00  0.00      LIG  
ATOM   9549 H13  LIG     1     -26.585  30.884 -18.165  1.00  0.00      LIG  
ATOM   9550 H14  LIG     1     -24.850  32.663 -15.554  1.00  0.00      LIG  
TER
REMARK  Energy: 0.929955
REMARK  SimpleFitness: 0.929955
REMARK  FullFitness: -2626.5242
REMARK  InterFull: -47.1169
REMARK  IntraFull: 68.9609
REMARK  solvFull: -3048.82
REMARK  surfFull: 400.452
REMARK  extraFull: 0.0
REMARK  deltaGcompsolvpol: -3048.82
REMARK  deltaGcompsolvnonpol: 400.452
REMARK  deltaGprotsolvpol: -3070.97
REMARK  deltaGprotsolvnonpol: 403.01
REMARK  deltaGligsolvpol: -19.4107
REMARK  deltaGligsolvnonpol: 6.39968
REMARK  deltaGvdw: -47.1169
REMARK  deltaGelec: 0.0
REMARK  deltaG: -6.751148
REMARK  Cluster: 3
REMARK  ClusterRank: 4
ATOM   9521 C    LIG     1     -20.811  32.036 -16.835  1.00  0.00      LIG  
ATOM   9522 C1   LIG     1     -22.295  31.825 -16.768  1.00  0.00      LIG  
ATOM   9523 O    LIG     1     -22.827  31.408 -15.749  1.00  0.00      LIG  
ATOM   9524 N    LIG     1     -22.929  32.083 -17.968  1.00  0.00      LIG  
ATOM   9525 C2   LIG     1     -24.372  32.018 -18.209  1.00  0.00      LIG  
ATOM   9526 C3   LIG     1     -24.835  30.581 -18.065  1.00  0.00      LIG  
ATOM   9527 O1   LIG     1     -26.012  30.266 -17.952  1.00  0.00      LIG  
ATOM   9528 C4   LIG     1     -25.213  33.072 -17.445  1.00  0.00      LIG  
ATOM   9529 C5   LIG     1     -26.610  33.312 -18.051  1.00  0.00      LIG  
ATOM   9530 C6   LIG     1     -27.270  34.599 -17.523  1.00  0.00      LIG  
ATOM   9531 C7   LIG     1     -28.659  34.806 -18.126  1.00  0.00      LIG  
ATOM   9532 O2   LIG     1     -28.585  35.288 -19.462  1.00  0.00      LIG  
ATOM   9533 O3   LIG     1     -27.423  34.551 -16.105  1.00  0.00      LIG  
ATOM   9534 O4   LIG     1     -26.515  33.391 -19.471  1.00  0.00      LIG  
ATOM   9535 O5   LIG     1     -25.351  32.732 -16.063  1.00  0.00      LIG  
ATOM   9536 H    LIG     1     -20.312  31.160 -16.412  1.00  0.00      LIG  
ATOM   9537 H1   LIG     1     -20.549  32.924 -16.255  1.00  0.00      LIG  
ATOM   9538 H2   LIG     1     -20.468  32.166 -17.867  1.00  0.00      LIG  
ATOM   9539 H3   LIG     1     -22.354  32.443 -18.725  1.00  0.00      LIG  
ATOM   9540 H4   LIG     1     -24.431  32.228 -19.280  1.00  0.00      LIG  
ATOM   9541 H5   LIG     1     -24.110  29.820 -18.393  1.00  0.00      LIG  
ATOM   9542 H6   LIG     1     -24.666  34.018 -17.488  1.00  0.00      LIG  
ATOM   9543 H7   LIG     1     -27.263  32.471 -17.803  1.00  0.00      LIG  
ATOM   9544 H8   LIG     1     -26.634  35.455 -17.773  1.00  0.00      LIG  
ATOM   9545 H9   LIG     1     -29.237  35.526 -17.542  1.00  0.00      LIG  
ATOM   9546 H10  LIG     1     -29.219  33.868 -18.122  1.00  0.00      LIG  
ATOM   9547 H11  LIG     1     -27.922  34.735 -19.914  1.00  0.00      LIG  
ATOM   9548 H12  LIG     1     -28.238  34.051 -15.924  1.00  0.00      LIG  
ATOM   9549 H13  LIG     1     -26.134  32.551 -19.782  1.00  0.00      LIG  
ATOM   9550 H14  LIG     1     -25.911  33.429 -15.672  1.00  0.00      LIG  
TER
REMARK  Energy: 4.36558
REMARK  SimpleFitness: 4.36558
REMARK  FullFitness: -2622.3938
REMARK  InterFull: -51.2783
REMARK  IntraFull: 74.5525
REMARK  solvFull: -3046.14
REMARK  surfFull: 400.472
REMARK  extraFull: 0.0
REMARK  deltaGcompsolvpol: -3046.14
REMARK  deltaGcompsolvnonpol: 400.472
REMARK  deltaGprotsolvpol: -3070.97
REMARK  deltaGprotsolvnonpol: 403.01
REMARK  deltaGligsolvpol: -21.3925
REMARK  deltaGligsolvnonpol: 6.54907
REMARK  deltaGvdw: -51.2783
REMARK  deltaGelec: 0.0
REMARK  deltaG: -6.8717446
REMARK  Cluster: 3
REMARK  ClusterRank: 5
ATOM   9521 C    LIG     1     -21.273  33.166 -16.601  1.00  0.00      LIG  
ATOM   9522 C1   LIG     1     -22.693  32.691 -16.571  1.00  0.00      LIG  
ATOM   9523 O    LIG     1     -23.293  32.563 -15.514  1.00  0.00      LIG  
ATOM   9524 N    LIG     1     -23.186  32.444 -17.840  1.00  0.00      LIG  
ATOM   9525 C2   LIG     1     -24.517  31.939 -18.183  1.00  0.00      LIG  
ATOM   9526 C3   LIG     1     -24.543  30.444 -17.931  1.00  0.00      LIG  
ATOM   9527 O1   LIG     1     -24.024  29.889 -16.972  1.00  0.00      LIG  
ATOM   9528 C4   LIG     1     -25.704  32.747 -17.599  1.00  0.00      LIG  
ATOM   9529 C5   LIG     1     -27.053  32.552 -18.323  1.00  0.00      LIG  
ATOM   9530 C6   LIG     1     -27.052  33.106 -19.750  1.00  0.00      LIG  
ATOM   9531 C7   LIG     1     -28.452  33.152 -20.356  1.00  0.00      LIG  
ATOM   9532 O2   LIG     1     -28.962  31.850 -20.609  1.00  0.00      LIG  
ATOM   9533 O3   LIG     1     -26.537  34.434 -19.749  1.00  0.00      LIG  
ATOM   9534 O4   LIG     1     -27.436  31.174 -18.338  1.00  0.00      LIG  
ATOM   9535 O5   LIG     1     -25.908  32.479 -16.210  1.00  0.00      LIG  
ATOM   9536 H    LIG     1     -21.259  34.258 -16.642  1.00  0.00      LIG  
ATOM   9537 H1   LIG     1     -20.741  32.759 -17.467  1.00  0.00      LIG  
ATOM   9538 H2   LIG     1     -20.769  32.825 -15.693  1.00  0.00      LIG  
ATOM   9539 H3   LIG     1     -22.544  32.595 -18.614  1.00  0.00      LIG  
ATOM   9540 H4   LIG     1     -24.543  32.043 -19.269  1.00  0.00      LIG  
ATOM   9541 H5   LIG     1     -25.194  29.872 -18.608  1.00  0.00      LIG  
ATOM   9542 H6   LIG     1     -25.445  33.807 -17.647  1.00  0.00      LIG  
ATOM   9543 H7   LIG     1     -27.821  33.078 -17.748  1.00  0.00      LIG  
ATOM   9544 H8   LIG     1     -26.416  32.480 -20.380  1.00  0.00      LIG  
ATOM   9545 H9   LIG     1     -28.443  33.703 -21.301  1.00  0.00      LIG  
ATOM   9546 H10  LIG     1     -29.140  33.673 -19.685  1.00  0.00      LIG  
ATOM   9547 H11  LIG     1     -28.838  31.341 -19.787  1.00  0.00      LIG  
ATOM   9548 H12  LIG     1     -27.169  34.984 -19.256  1.00  0.00      LIG  
ATOM   9549 H13  LIG     1     -26.913  30.733 -19.031  1.00  0.00      LIG  
ATOM   9550 H14  LIG     1     -25.030  32.575 -15.790  1.00  0.00      LIG  
TER
REMARK  Energy: 8.07343
REMARK  SimpleFitness: 8.07343
REMARK  FullFitness: -2617.9717
REMARK  InterFull: -31.329
REMARK  IntraFull: 72.8832
REMARK  solvFull: -3060.19
REMARK  surfFull: 400.664
REMARK  extraFull: 0.0
REMARK  deltaGcompsolvpol: -3060.19
REMARK  deltaGcompsolvnonpol: 400.664
REMARK  deltaGprotsolvpol: -3070.97
REMARK  deltaGprotsolvnonpol: 403.01
REMARK  deltaGligsolvpol: -17.0558
REMARK  deltaGligsolvnonpol: 6.60355
REMARK  deltaGvdw: -31.329
REMARK  deltaGelec: 0.0
REMARK  deltaG: -6.096799
REMARK  Cluster: 3
REMARK  ClusterRank: 6
ATOM   9521 C    LIG     1     -20.448  31.684 -17.102  1.00  0.00      LIG  
ATOM   9522 C1   LIG     1     -21.336  32.301 -16.065  1.00  0.00      LIG  
ATOM   9523 O    LIG     1     -20.873  32.899 -15.108  1.00  0.00      LIG  
ATOM   9524 N    LIG     1     -22.695  32.138 -16.260  1.00  0.00      LIG  
ATOM   9525 C2   LIG     1     -23.356  31.449 -17.371  1.00  0.00      LIG  
ATOM   9526 C3   LIG     1     -23.476  30.029 -16.833  1.00  0.00      LIG  
ATOM   9527 O1   LIG     1     -24.309  29.223 -17.219  1.00  0.00      LIG  
ATOM   9528 C4   LIG     1     -24.739  32.050 -17.718  1.00  0.00      LIG  
ATOM   9529 C5   LIG     1     -24.735  33.491 -18.291  1.00  0.00      LIG  
ATOM   9530 C6   LIG     1     -26.057  34.241 -18.039  1.00  0.00      LIG  
ATOM   9531 C7   LIG     1     -27.254  33.687 -18.800  1.00  0.00      LIG  
ATOM   9532 O2   LIG     1     -27.021  33.721 -20.202  1.00  0.00      LIG  
ATOM   9533 O3   LIG     1     -26.372  34.239 -16.646  1.00  0.00      LIG  
ATOM   9534 O4   LIG     1     -23.693  34.303 -17.752  1.00  0.00      LIG  
ATOM   9535 O5   LIG     1     -25.379  31.244 -18.711  1.00  0.00      LIG  
ATOM   9536 H    LIG     1     -19.408  31.863 -16.823  1.00  0.00      LIG  
ATOM   9537 H1   LIG     1     -20.635  32.146 -18.076  1.00  0.00      LIG  
ATOM   9538 H2   LIG     1     -20.616  30.605 -17.153  1.00  0.00      LIG  
ATOM   9539 H3   LIG     1     -23.288  32.533 -15.537  1.00  0.00      LIG  
ATOM   9540 H4   LIG     1     -22.716  31.415 -18.255  1.00  0.00      LIG  
ATOM   9541 H5   LIG     1     -22.589  29.650 -16.302  1.00  0.00      LIG  
ATOM   9542 H6   LIG     1     -25.364  32.007 -16.823  1.00  0.00      LIG  
ATOM   9543 H7   LIG     1     -24.562  33.460 -19.370  1.00  0.00      LIG  
ATOM   9544 H8   LIG     1     -25.920  35.288 -18.329  1.00  0.00      LIG  
ATOM   9545 H9   LIG     1     -28.144  34.283 -18.586  1.00  0.00      LIG  
ATOM   9546 H10  LIG     1     -27.488  32.664 -18.497  1.00  0.00      LIG  
ATOM   9547 H11  LIG     1     -26.207  33.213 -20.367  1.00  0.00      LIG  
ATOM   9548 H12  LIG     1     -25.578  34.571 -16.194  1.00  0.00      LIG  
ATOM   9549 H13  LIG     1     -22.855  33.964 -18.114  1.00  0.00      LIG  
ATOM   9550 H14  LIG     1     -25.176  30.313 -18.502  1.00  0.00      LIG  
TER
REMARK  Energy: 12.7063
REMARK  SimpleFitness: 12.7063
REMARK  FullFitness: -2614.0295
REMARK  InterFull: -44.3925
REMARK  IntraFull: 80.3469
REMARK  solvFull: -3050.7
REMARK  surfFull: 400.716
REMARK  extraFull: 0.0
REMARK  deltaGcompsolvpol: -3050.7
REMARK  deltaGcompsolvnonpol: 400.716
REMARK  deltaGprotsolvpol: -3070.97
REMARK  deltaGprotsolvnonpol: 403.01
REMARK  deltaGligsolvpol: -18.8014
REMARK  deltaGligsolvnonpol: 6.80819
REMARK  deltaGvdw: -44.3925
REMARK  deltaGelec: 0.0
REMARK  deltaG: -6.6594276
REMARK  Cluster: 3
REMARK  ClusterRank: 7
ATOM   9521 C    LIG     1     -21.889  31.912 -15.311  1.00  0.00      LIG  
ATOM   9522 C1   LIG     1     -21.265  31.687 -16.656  1.00  0.00      LIG  
ATOM   9523 O    LIG     1     -20.053  31.637 -16.774  1.00  0.00      LIG  
ATOM   9524 N    LIG     1     -22.100  31.573 -17.757  1.00  0.00      LIG  
ATOM   9525 C2   LIG     1     -23.559  31.535 -17.884  1.00  0.00      LIG  
ATOM   9526 C3   LIG     1     -24.055  30.132 -17.597  1.00  0.00      LIG  
ATOM   9527 O1   LIG     1     -23.682  29.434 -16.663  1.00  0.00      LIG  
ATOM   9528 C4   LIG     1     -24.366  32.722 -17.306  1.00  0.00      LIG  
ATOM   9529 C5   LIG     1     -25.423  33.204 -18.314  1.00  0.00      LIG  
ATOM   9530 C6   LIG     1     -26.654  32.290 -18.432  1.00  0.00      LIG  
ATOM   9531 C7   LIG     1     -27.825  32.713 -17.549  1.00  0.00      LIG  
ATOM   9532 O2   LIG     1     -28.750  31.633 -17.458  1.00  0.00      LIG  
ATOM   9533 O3   LIG     1     -27.098  32.321 -19.788  1.00  0.00      LIG  
ATOM   9534 O4   LIG     1     -25.846  34.522 -17.959  1.00  0.00      LIG  
ATOM   9535 O5   LIG     1     -24.979  32.420 -16.050  1.00  0.00      LIG  
ATOM   9536 H    LIG     1     -22.304  32.922 -15.262  1.00  0.00      LIG  
ATOM   9537 H1   LIG     1     -21.112  31.810 -14.548  1.00  0.00      LIG  
ATOM   9538 H2   LIG     1     -22.666  31.170 -15.116  1.00  0.00      LIG  
ATOM   9539 H3   LIG     1     -21.603  31.413 -18.627  1.00  0.00      LIG  
ATOM   9540 H4   LIG     1     -23.672  31.634 -18.962  1.00  0.00      LIG  
ATOM   9541 H5   LIG     1     -24.881  29.791 -18.239  1.00  0.00      LIG  
ATOM   9542 H6   LIG     1     -23.679  33.553 -17.117  1.00  0.00      LIG  
ATOM   9543 H7   LIG     1     -24.933  33.303 -19.286  1.00  0.00      LIG  
ATOM   9544 H8   LIG     1     -26.386  31.251 -18.235  1.00  0.00      LIG  
ATOM   9545 H9   LIG     1     -28.356  33.571 -17.974  1.00  0.00      LIG  
ATOM   9546 H10  LIG     1     -27.500  32.950 -16.533  1.00  0.00      LIG  
ATOM   9547 H11  LIG     1     -29.607  32.016 -17.221  1.00  0.00      LIG  
ATOM   9548 H12  LIG     1     -27.808  31.658 -19.857  1.00  0.00      LIG  
ATOM   9549 H13  LIG     1     -26.428  34.822 -18.679  1.00  0.00      LIG  
ATOM   9550 H14  LIG     1     -25.468  33.222 -15.795  1.00  0.00      LIG  
TER
REMARK  Energy: 2.5666
REMARK  SimpleFitness: 2.5666
REMARK  FullFitness: -2633.641
REMARK  InterFull: -21.9724
REMARK  IntraFull: 63.7122
REMARK  solvFull: -3077.92
REMARK  surfFull: 402.539
REMARK  extraFull: 0.0
REMARK  deltaGcompsolvpol: -3077.92
REMARK  deltaGcompsolvnonpol: 402.539
REMARK  deltaGprotsolvpol: -3070.97
REMARK  deltaGprotsolvnonpol: 403.01
REMARK  deltaGligsolvpol: -17.4922
REMARK  deltaGligsolvnonpol: 6.65454
REMARK  deltaGvdw: -21.9724
REMARK  deltaGelec: 0.0
REMARK  deltaG: -6.0974803
REMARK  Cluster: 4
REMARK  ClusterRank: 0
ATOM   9521 C    LIG     1     -11.072   1.992  -0.838  1.00  0.00      LIG  
ATOM   9522 C1   LIG     1     -10.430   2.305  -2.155  1.00  0.00      LIG  
ATOM   9523 O    LIG     1     -10.598   3.373  -2.720  1.00  0.00      LIG  
ATOM   9524 N    LIG     1      -9.594   1.303  -2.588  1.00  0.00      LIG  
ATOM   9525 C2   LIG     1      -8.862   1.385  -3.846  1.00  0.00      LIG  
ATOM   9526 C3   LIG     1      -7.514   0.770  -3.539  1.00  0.00      LIG  
ATOM   9527 O1   LIG     1      -6.741   0.381  -4.403  1.00  0.00      LIG  
ATOM   9528 C4   LIG     1      -9.635   0.724  -5.008  1.00  0.00      LIG  
ATOM   9529 C5   LIG     1      -9.026   0.991  -6.389  1.00  0.00      LIG  
ATOM   9530 C6   LIG     1      -9.884   0.385  -7.515  1.00  0.00      LIG  
ATOM   9531 C7   LIG     1     -11.263   1.022  -7.702  1.00  0.00      LIG  
ATOM   9532 O2   LIG     1     -11.177   2.404  -8.021  1.00  0.00      LIG  
ATOM   9533 O3   LIG     1      -9.168   0.449  -8.749  1.00  0.00      LIG  
ATOM   9534 O4   LIG     1      -8.837   2.394  -6.569  1.00  0.00      LIG  
ATOM   9535 O5   LIG     1      -9.766  -0.689  -4.817  1.00  0.00      LIG  
ATOM   9536 H    LIG     1     -12.047   2.484  -0.798  1.00  0.00      LIG  
ATOM   9537 H1   LIG     1     -10.436   2.365  -0.030  1.00  0.00      LIG  
ATOM   9538 H2   LIG     1     -11.220   0.914  -0.721  1.00  0.00      LIG  
ATOM   9539 H3   LIG     1      -9.559   0.439  -2.056  1.00  0.00      LIG  
ATOM   9540 H4   LIG     1      -8.695   2.445  -4.058  1.00  0.00      LIG  
ATOM   9541 H5   LIG     1      -7.102   1.020  -2.548  1.00  0.00      LIG  
ATOM   9542 H6   LIG     1     -10.645   1.139  -4.992  1.00  0.00      LIG  
ATOM   9543 H7   LIG     1      -8.036   0.533  -6.458  1.00  0.00      LIG  
ATOM   9544 H8   LIG     1     -10.030  -0.678  -7.311  1.00  0.00      LIG  
ATOM   9545 H9   LIG     1     -11.870   0.919  -6.799  1.00  0.00      LIG  
ATOM   9546 H10  LIG     1     -11.794   0.540  -8.527  1.00  0.00      LIG  
ATOM   9547 H11  LIG     1     -10.443   2.763  -7.488  1.00  0.00      LIG  
ATOM   9548 H12  LIG     1      -9.143   1.389  -9.001  1.00  0.00      LIG  
ATOM   9549 H13  LIG     1      -8.179   2.686  -5.912  1.00  0.00      LIG  
ATOM   9550 H14  LIG     1      -8.875  -1.070  -4.912  1.00  0.00      LIG  
TER
REMARK  Energy: 17.044
REMARK  SimpleFitness: 17.044
REMARK  FullFitness: -2617.6082
REMARK  InterFull: -29.8827
REMARK  IntraFull: 76.8905
REMARK  solvFull: -3067.06
REMARK  surfFull: 402.444
REMARK  extraFull: 0.0
REMARK  deltaGcompsolvpol: -3067.06
REMARK  deltaGcompsolvnonpol: 402.444
REMARK  deltaGprotsolvpol: -3070.97
REMARK  deltaGprotsolvnonpol: 403.01
REMARK  deltaGligsolvpol: -19.7311
REMARK  deltaGligsolvnonpol: 6.69811
REMARK  deltaGvdw: -29.8827
REMARK  deltaGelec: 0.0
REMARK  deltaG: -6.057259
REMARK  Cluster: 4
REMARK  ClusterRank: 1
ATOM   9521 C    LIG     1      -9.183   3.678  -1.544  1.00  0.00      LIG  
ATOM   9522 C1   LIG     1      -9.591   2.542  -2.431  1.00  0.00      LIG  
ATOM   9523 O    LIG     1     -10.656   1.964  -2.292  1.00  0.00      LIG  
ATOM   9524 N    LIG     1      -8.591   2.171  -3.308  1.00  0.00      LIG  
ATOM   9525 C2   LIG     1      -8.735   1.141  -4.331  1.00  0.00      LIG  
ATOM   9526 C3   LIG     1      -8.738  -0.218  -3.648  1.00  0.00      LIG  
ATOM   9527 O1   LIG     1      -8.917  -1.269  -4.246  1.00  0.00      LIG  
ATOM   9528 C4   LIG     1      -9.854   1.475  -5.350  1.00  0.00      LIG  
ATOM   9529 C5   LIG     1      -9.215   1.988  -6.645  1.00  0.00      LIG  
ATOM   9530 C6   LIG     1      -8.718   0.845  -7.552  1.00  0.00      LIG  
ATOM   9531 C7   LIG     1      -9.534   0.629  -8.821  1.00  0.00      LIG  
ATOM   9532 O2   LIG     1     -10.920   0.494  -8.542  1.00  0.00      LIG  
ATOM   9533 O3   LIG     1      -7.378   1.119  -7.953  1.00  0.00      LIG  
ATOM   9534 O4   LIG     1     -10.146   2.828  -7.332  1.00  0.00      LIG  
ATOM   9535 O5   LIG     1     -10.731   0.383  -5.631  1.00  0.00      LIG  
ATOM   9536 H    LIG     1      -8.804   3.278  -0.600  1.00  0.00      LIG  
ATOM   9537 H1   LIG     1     -10.058   4.305  -1.355  1.00  0.00      LIG  
ATOM   9538 H2   LIG     1      -8.411   4.293  -2.017  1.00  0.00      LIG  
ATOM   9539 H3   LIG     1      -7.761   2.757  -3.354  1.00  0.00      LIG  
ATOM   9540 H4   LIG     1      -7.772   1.177  -4.848  1.00  0.00      LIG  
ATOM   9541 H5   LIG     1      -8.217  -0.251  -2.678  1.00  0.00      LIG  
ATOM   9542 H6   LIG     1     -10.501   2.263  -4.954  1.00  0.00      LIG  
ATOM   9543 H7   LIG     1      -8.384   2.644  -6.379  1.00  0.00      LIG  
ATOM   9544 H8   LIG     1      -8.675  -0.083  -6.977  1.00  0.00      LIG  
ATOM   9545 H9   LIG     1      -9.196  -0.273  -9.336  1.00  0.00      LIG  
ATOM   9546 H10  LIG     1      -9.393   1.458  -9.518  1.00  0.00      LIG  
ATOM   9547 H11  LIG     1     -11.214   1.381  -8.263  1.00  0.00      LIG  
ATOM   9548 H12  LIG     1      -7.112   0.410  -8.566  1.00  0.00      LIG  
ATOM   9549 H13  LIG     1     -10.133   3.691  -6.880  1.00  0.00      LIG  
ATOM   9550 H14  LIG     1     -11.143   0.562  -6.495  1.00  0.00      LIG  
TER
REMARK  Energy: 18.9219
REMARK  SimpleFitness: 18.9219
REMARK  FullFitness: -2615.218
REMARK  InterFull: -21.3897
REMARK  IntraFull: 74.9585
REMARK  solvFull: -3071.18
REMARK  surfFull: 402.393
REMARK  extraFull: 0.0
REMARK  deltaGcompsolvpol: -3071.18
REMARK  deltaGcompsolvnonpol: 402.393
REMARK  deltaGprotsolvpol: -3070.97
REMARK  deltaGprotsolvnonpol: 403.01
REMARK  deltaGligsolvpol: -20.0033
REMARK  deltaGligsolvnonpol: 6.67383
REMARK  deltaGvdw: -21.3897
REMARK  deltaGelec: 0.0
REMARK  deltaG: -5.491826
REMARK  Cluster: 4
REMARK  ClusterRank: 2
ATOM   9521 C    LIG     1      -9.073   2.678  -0.893  1.00  0.00      LIG  
ATOM   9522 C1   LIG     1      -9.357   1.772  -2.054  1.00  0.00      LIG  
ATOM   9523 O    LIG     1     -10.420   1.180  -2.162  1.00  0.00      LIG  
ATOM   9524 N    LIG     1      -8.309   1.720  -2.951  1.00  0.00      LIG  
ATOM   9525 C2   LIG     1      -8.351   1.025  -4.233  1.00  0.00      LIG  
ATOM   9526 C3   LIG     1      -8.224  -0.466  -3.964  1.00  0.00      LIG  
ATOM   9527 O1   LIG     1      -8.390  -1.319  -4.825  1.00  0.00      LIG  
ATOM   9528 C4   LIG     1      -9.503   1.509  -5.146  1.00  0.00      LIG  
ATOM   9529 C5   LIG     1      -9.008   1.892  -6.547  1.00  0.00      LIG  
ATOM   9530 C6   LIG     1      -8.491   0.723  -7.407  1.00  0.00      LIG  
ATOM   9531 C7   LIG     1      -9.549  -0.202  -8.007  1.00  0.00      LIG  
ATOM   9532 O2   LIG     1     -10.489   0.504  -8.804  1.00  0.00      LIG  
ATOM   9533 O3   LIG     1      -7.704   1.250  -8.474  1.00  0.00      LIG  
ATOM   9534 O4   LIG     1     -10.032   2.638  -7.213  1.00  0.00      LIG  
ATOM   9535 O5   LIG     1     -10.593   0.591  -5.214  1.00  0.00      LIG  
ATOM   9536 H    LIG     1      -9.452   2.208   0.019  1.00  0.00      LIG  
ATOM   9537 H1   LIG     1      -9.578   3.633  -1.055  1.00  0.00      LIG  
ATOM   9538 H2   LIG     1      -7.999   2.851  -0.774  1.00  0.00      LIG  
ATOM   9539 H3   LIG     1      -7.498   2.299  -2.759  1.00  0.00      LIG  
ATOM   9540 H4   LIG     1      -7.403   1.314  -4.693  1.00  0.00      LIG  
ATOM   9541 H5   LIG     1      -7.637  -0.730  -3.070  1.00  0.00      LIG  
ATOM   9542 H6   LIG     1      -9.937   2.415  -4.714  1.00  0.00      LIG  
ATOM   9543 H7   LIG     1      -8.187   2.599  -6.432  1.00  0.00      LIG  
ATOM   9544 H8   LIG     1      -7.802   0.121  -6.812  1.00  0.00      LIG  
ATOM   9545 H9   LIG     1     -10.095  -0.736  -7.229  1.00  0.00      LIG  
ATOM   9546 H10  LIG     1      -9.086  -0.947  -8.655  1.00  0.00      LIG  
ATOM   9547 H11  LIG     1     -10.638   1.356  -8.352  1.00  0.00      LIG  
ATOM   9548 H12  LIG     1      -8.333   1.594  -9.133  1.00  0.00      LIG  
ATOM   9549 H13  LIG     1     -10.089   3.502  -6.767  1.00  0.00      LIG  
ATOM   9550 H14  LIG     1     -11.214   0.949  -5.873  1.00  0.00      LIG  
TER
REMARK  Energy: 2.09544
REMARK  SimpleFitness: 2.09544
REMARK  FullFitness: -2633.6077
REMARK  InterFull: -33.6116
REMARK  IntraFull: 60.3719
REMARK  solvFull: -3061.65
REMARK  surfFull: 401.282
REMARK  extraFull: 0.0
REMARK  deltaGcompsolvpol: -3061.65
REMARK  deltaGcompsolvnonpol: 401.282
REMARK  deltaGprotsolvpol: -3070.97
REMARK  deltaGprotsolvnonpol: 403.01
REMARK  deltaGligsolvpol: -17.3063
REMARK  deltaGligsolvnonpol: 6.71016
REMARK  deltaGvdw: -33.6116
REMARK  deltaGelec: 0.0
REMARK  deltaG: -6.338373
REMARK  Cluster: 5
REMARK  ClusterRank: 0
ATOM   9521 C    LIG     1     -15.903   0.967 -24.479  1.00  0.00      LIG  
ATOM   9522 C1   LIG     1     -17.020   1.685 -25.176  1.00  0.00      LIG  
ATOM   9523 O    LIG     1     -17.272   1.505 -26.356  1.00  0.00      LIG  
ATOM   9524 N    LIG     1     -17.765   2.459 -24.313  1.00  0.00      LIG  
ATOM   9525 C2   LIG     1     -18.913   3.237 -24.759  1.00  0.00      LIG  
ATOM   9526 C3   LIG     1     -19.948   3.126 -23.669  1.00  0.00      LIG  
ATOM   9527 O1   LIG     1     -20.875   3.916 -23.569  1.00  0.00      LIG  
ATOM   9528 C4   LIG     1     -18.582   4.702 -25.107  1.00  0.00      LIG  
ATOM   9529 C5   LIG     1     -17.530   5.360 -24.193  1.00  0.00      LIG  
ATOM   9530 C6   LIG     1     -17.392   6.870 -24.421  1.00  0.00      LIG  
ATOM   9531 C7   LIG     1     -16.312   7.432 -23.500  1.00  0.00      LIG  
ATOM   9532 O2   LIG     1     -16.222   8.848 -23.618  1.00  0.00      LIG  
ATOM   9533 O3   LIG     1     -17.030   7.159 -25.771  1.00  0.00      LIG  
ATOM   9534 O4   LIG     1     -17.873   5.158 -22.822  1.00  0.00      LIG  
ATOM   9535 O5   LIG     1     -18.146   4.730 -26.464  1.00  0.00      LIG  
ATOM   9536 H    LIG     1     -15.490   1.580 -23.673  1.00  0.00      LIG  
ATOM   9537 H1   LIG     1     -15.109   0.762 -25.202  1.00  0.00      LIG  
ATOM   9538 H2   LIG     1     -16.280   0.027 -24.068  1.00  0.00      LIG  
ATOM   9539 H3   LIG     1     -17.446   2.565 -23.356  1.00  0.00      LIG  
ATOM   9540 H4   LIG     1     -19.337   2.730 -25.633  1.00  0.00      LIG  
ATOM   9541 H5   LIG     1     -20.043   2.130 -23.207  1.00  0.00      LIG  
ATOM   9542 H6   LIG     1     -19.496   5.302 -25.071  1.00  0.00      LIG  
ATOM   9543 H7   LIG     1     -16.556   4.894 -24.375  1.00  0.00      LIG  
ATOM   9544 H8   LIG     1     -18.341   7.376 -24.220  1.00  0.00      LIG  
ATOM   9545 H9   LIG     1     -15.337   7.018 -23.769  1.00  0.00      LIG  
ATOM   9546 H10  LIG     1     -16.508   7.200 -22.450  1.00  0.00      LIG  
ATOM   9547 H11  LIG     1     -17.066   9.211 -23.280  1.00  0.00      LIG  
ATOM   9548 H12  LIG     1     -16.675   8.065 -25.765  1.00  0.00      LIG  
ATOM   9549 H13  LIG     1     -18.752   5.556 -22.687  1.00  0.00      LIG  
ATOM   9550 H14  LIG     1     -17.668   5.574 -26.576  1.00  0.00      LIG  
TER
REMARK  Energy: 2.47301
REMARK  SimpleFitness: 2.47301
REMARK  FullFitness: -2632.064
REMARK  InterFull: -34.2307
REMARK  IntraFull: 63.6187
REMARK  solvFull: -3062.77
REMARK  surfFull: 401.318
REMARK  extraFull: 0.0
REMARK  deltaGcompsolvpol: -3062.77
REMARK  deltaGcompsolvnonpol: 401.318
REMARK  deltaGprotsolvpol: -3070.97
REMARK  deltaGprotsolvnonpol: 403.01
REMARK  deltaGligsolvpol: -18.0128
REMARK  deltaGligsolvnonpol: 6.75599
REMARK  deltaGvdw: -34.2307
REMARK  deltaGelec: 0.0
REMARK  deltaG: -6.4231853
REMARK  Cluster: 5
REMARK  ClusterRank: 1
ATOM   9521 C    LIG     1     -15.805   1.356 -23.596  1.00  0.00      LIG  
ATOM   9522 C1   LIG     1     -16.970   1.950 -24.325  1.00  0.00      LIG  
ATOM   9523 O    LIG     1     -17.249   1.637 -25.473  1.00  0.00      LIG  
ATOM   9524 N    LIG     1     -17.709   2.791 -23.527  1.00  0.00      LIG  
ATOM   9525 C2   LIG     1     -18.903   3.471 -24.005  1.00  0.00      LIG  
ATOM   9526 C3   LIG     1     -19.872   3.562 -22.853  1.00  0.00      LIG  
ATOM   9527 O1   LIG     1     -19.552   3.520 -21.672  1.00  0.00      LIG  
ATOM   9528 C4   LIG     1     -18.640   4.862 -24.620  1.00  0.00      LIG  
ATOM   9529 C5   LIG     1     -17.466   5.644 -24.000  1.00  0.00      LIG  
ATOM   9530 C6   LIG     1     -17.423   7.105 -24.461  1.00  0.00      LIG  
ATOM   9531 C7   LIG     1     -16.246   7.829 -23.813  1.00  0.00      LIG  
ATOM   9532 O2   LIG     1     -16.331   9.228 -24.058  1.00  0.00      LIG  
ATOM   9533 O3   LIG     1     -17.282   7.193 -25.879  1.00  0.00      LIG  
ATOM   9534 O4   LIG     1     -17.569   5.644 -22.577  1.00  0.00      LIG  
ATOM   9535 O5   LIG     1     -18.426   4.685 -26.019  1.00  0.00      LIG  
ATOM   9536 H    LIG     1     -15.111   0.935 -24.327  1.00  0.00      LIG  
ATOM   9537 H1   LIG     1     -16.158   0.565 -22.929  1.00  0.00      LIG  
ATOM   9538 H2   LIG     1     -15.285   2.126 -23.017  1.00  0.00      LIG  
ATOM   9539 H3   LIG     1     -17.385   2.992 -22.586  1.00  0.00      LIG  
ATOM   9540 H4   LIG     1     -19.378   2.820 -24.747  1.00  0.00      LIG  
ATOM   9541 H5   LIG     1     -20.906   3.808 -23.138  1.00  0.00      LIG  
ATOM   9542 H6   LIG     1     -19.544   5.472 -24.525  1.00  0.00      LIG  
ATOM   9543 H7   LIG     1     -16.524   5.162 -24.280  1.00  0.00      LIG  
ATOM   9544 H8   LIG     1     -18.354   7.613 -24.191  1.00  0.00      LIG  
ATOM   9545 H9   LIG     1     -15.301   7.478 -24.232  1.00  0.00      LIG  
ATOM   9546 H10  LIG     1     -16.221   7.691 -22.730  1.00  0.00      LIG  
ATOM   9547 H11  LIG     1     -17.140   9.533 -23.598  1.00  0.00      LIG  
ATOM   9548 H12  LIG     1     -17.028   8.114 -26.067  1.00  0.00      LIG  
ATOM   9549 H13  LIG     1     -18.414   6.070 -22.351  1.00  0.00      LIG  
ATOM   9550 H14  LIG     1     -17.987   5.498 -26.332  1.00  0.00      LIG  
TER
REMARK  Energy: 8.98942
REMARK  SimpleFitness: 8.98942
REMARK  FullFitness: -2625.182
REMARK  InterFull: -32.1832
REMARK  IntraFull: 69.6311
REMARK  solvFull: -3064.13
REMARK  surfFull: 401.5
REMARK  extraFull: 0.0
REMARK  deltaGcompsolvpol: -3064.13
REMARK  deltaGcompsolvnonpol: 401.5
REMARK  deltaGprotsolvpol: -3070.97
REMARK  deltaGprotsolvnonpol: 403.01
REMARK  deltaGligsolvpol: -17.145
REMARK  deltaGligsolvnonpol: 6.6188
REMARK  deltaGvdw: -32.1832
REMARK  deltaGelec: 0.0
REMARK  deltaG: -6.335629
REMARK  Cluster: 5
REMARK  ClusterRank: 2
ATOM   9521 C    LIG     1     -19.742   1.491 -24.691  1.00  0.00      LIG  
ATOM   9522 C1   LIG     1     -18.367   1.435 -24.094  1.00  0.00      LIG  
ATOM   9523 O    LIG     1     -17.706   0.408 -24.120  1.00  0.00      LIG  
ATOM   9524 N    LIG     1     -17.887   2.605 -23.536  1.00  0.00      LIG  
ATOM   9525 C2   LIG     1     -18.573   3.892 -23.406  1.00  0.00      LIG  
ATOM   9526 C3   LIG     1     -19.170   3.891 -22.010  1.00  0.00      LIG  
ATOM   9527 O1   LIG     1     -19.541   4.901 -21.430  1.00  0.00      LIG  
ATOM   9528 C4   LIG     1     -17.599   5.060 -23.680  1.00  0.00      LIG  
ATOM   9529 C5   LIG     1     -18.280   6.437 -23.776  1.00  0.00      LIG  
ATOM   9530 C6   LIG     1     -17.460   7.497 -24.534  1.00  0.00      LIG  
ATOM   9531 C7   LIG     1     -16.178   7.916 -23.830  1.00  0.00      LIG  
ATOM   9532 O2   LIG     1     -16.418   8.211 -22.461  1.00  0.00      LIG  
ATOM   9533 O3   LIG     1     -17.118   7.056 -25.850  1.00  0.00      LIG  
ATOM   9534 O4   LIG     1     -19.542   6.307 -24.431  1.00  0.00      LIG  
ATOM   9535 O5   LIG     1     -16.556   5.094 -22.695  1.00  0.00      LIG  
ATOM   9536 H    LIG     1     -20.000   0.498 -25.068  1.00  0.00      LIG  
ATOM   9537 H1   LIG     1     -19.759   2.203 -25.521  1.00  0.00      LIG  
ATOM   9538 H2   LIG     1     -20.470   1.780 -23.927  1.00  0.00      LIG  
ATOM   9539 H3   LIG     1     -16.966   2.542 -23.113  1.00  0.00      LIG  
ATOM   9540 H4   LIG     1     -19.404   3.920 -24.111  1.00  0.00      LIG  
ATOM   9541 H5   LIG     1     -19.595   2.926 -21.690  1.00  0.00      LIG  
ATOM   9542 H6   LIG     1     -17.112   4.852 -24.637  1.00  0.00      LIG  
ATOM   9543 H7   LIG     1     -18.486   6.810 -22.770  1.00  0.00      LIG  
ATOM   9544 H8   LIG     1     -18.091   8.382 -24.659  1.00  0.00      LIG  
ATOM   9545 H9   LIG     1     -15.748   8.800 -24.309  1.00  0.00      LIG  
ATOM   9546 H10  LIG     1     -15.423   7.129 -23.891  1.00  0.00      LIG  
ATOM   9547 H11  LIG     1     -17.148   8.863 -22.442  1.00  0.00      LIG  
ATOM   9548 H12  LIG     1     -16.547   6.272 -25.762  1.00  0.00      LIG  
ATOM   9549 H13  LIG     1     -19.914   7.204 -24.495  1.00  0.00      LIG  
ATOM   9550 H14  LIG     1     -16.331   6.030 -22.549  1.00  0.00      LIG  
TER
REMARK  Energy: 9.94716
REMARK  SimpleFitness: 9.94716
REMARK  FullFitness: -2623.0664
REMARK  InterFull: -30.058
REMARK  IntraFull: 68.2107
REMARK  solvFull: -3062.74
REMARK  surfFull: 401.521
REMARK  extraFull: 0.0
REMARK  deltaGcompsolvpol: -3062.74
REMARK  deltaGcompsolvnonpol: 401.521
REMARK  deltaGprotsolvpol: -3070.97
REMARK  deltaGprotsolvnonpol: 403.01
REMARK  deltaGligsolvpol: -16.4092
REMARK  deltaGligsolvnonpol: 6.90583
REMARK  deltaGvdw: -30.058
REMARK  deltaGelec: 0.0
REMARK  deltaG: -6.119721
REMARK  Cluster: 5
REMARK  ClusterRank: 3
ATOM   9521 C    LIG     1     -15.963   1.346 -24.241  1.00  0.00      LIG  
ATOM   9522 C1   LIG     1     -17.283   1.879 -24.711  1.00  0.00      LIG  
ATOM   9523 O    LIG     1     -17.808   1.499 -25.746  1.00  0.00      LIG  
ATOM   9524 N    LIG     1     -17.844   2.756 -23.811  1.00  0.00      LIG  
ATOM   9525 C2   LIG     1     -19.164   3.339 -24.003  1.00  0.00      LIG  
ATOM   9526 C3   LIG     1     -20.055   2.637 -23.011  1.00  0.00      LIG  
ATOM   9527 O1   LIG     1     -20.083   2.918 -21.821  1.00  0.00      LIG  
ATOM   9528 C4   LIG     1     -19.211   4.863 -23.781  1.00  0.00      LIG  
ATOM   9529 C5   LIG     1     -18.196   5.384 -22.741  1.00  0.00      LIG  
ATOM   9530 C6   LIG     1     -16.821   5.791 -23.319  1.00  0.00      LIG  
ATOM   9531 C7   LIG     1     -16.606   7.297 -23.471  1.00  0.00      LIG  
ATOM   9532 O2   LIG     1     -17.579   7.882 -24.328  1.00  0.00      LIG  
ATOM   9533 O3   LIG     1     -15.803   5.316 -22.439  1.00  0.00      LIG  
ATOM   9534 O4   LIG     1     -18.779   6.489 -22.050  1.00  0.00      LIG  
ATOM   9535 O5   LIG     1     -19.027   5.500 -25.045  1.00  0.00      LIG  
ATOM   9536 H    LIG     1     -15.337   1.144 -25.115  1.00  0.00      LIG  
ATOM   9537 H1   LIG     1     -16.127   0.421 -23.681  1.00  0.00      LIG  
ATOM   9538 H2   LIG     1     -15.450   2.074 -23.605  1.00  0.00      LIG  
ATOM   9539 H3   LIG     1     -17.354   2.930 -22.939  1.00  0.00      LIG  
ATOM   9540 H4   LIG     1     -19.541   3.088 -25.000  1.00  0.00      LIG  
ATOM   9541 H5   LIG     1     -20.465   1.676 -23.358  1.00  0.00      LIG  
ATOM   9542 H6   LIG     1     -20.224   5.145 -23.469  1.00  0.00      LIG  
ATOM   9543 H7   LIG     1     -18.073   4.614 -21.973  1.00  0.00      LIG  
ATOM   9544 H8   LIG     1     -16.660   5.289 -24.277  1.00  0.00      LIG  
ATOM   9545 H9   LIG     1     -15.615   7.500 -23.885  1.00  0.00      LIG  
ATOM   9546 H10  LIG     1     -16.646   7.797 -22.498  1.00  0.00      LIG  
ATOM   9547 H11  LIG     1     -17.762   8.771 -23.965  1.00  0.00      LIG  
ATOM   9548 H12  LIG     1     -15.947   5.753 -21.583  1.00  0.00      LIG  
ATOM   9549 H13  LIG     1     -18.860   7.219 -22.690  1.00  0.00      LIG  
ATOM   9550 H14  LIG     1     -18.746   6.417 -24.867  1.00  0.00      LIG  
TER
REMARK  Energy: 10.2275
REMARK  SimpleFitness: 10.2275
REMARK  FullFitness: -2622.4973
REMARK  InterFull: -25.3878
REMARK  IntraFull: 68.4396
REMARK  solvFull: -3067.24
REMARK  surfFull: 401.691
REMARK  extraFull: 0.0
REMARK  deltaGcompsolvpol: -3067.24
REMARK  deltaGcompsolvnonpol: 401.691
REMARK  deltaGprotsolvpol: -3070.97
REMARK  deltaGprotsolvnonpol: 403.01
REMARK  deltaGligsolvpol: -17.753
REMARK  deltaGligsolvnonpol: 7.06207
REMARK  deltaGvdw: -25.3878
REMARK  deltaGelec: 0.0
REMARK  deltaG: -5.8697767
REMARK  Cluster: 5
REMARK  ClusterRank: 4
ATOM   9521 C    LIG     1     -14.835   3.374 -22.907  1.00  0.00      LIG  
ATOM   9522 C1   LIG     1     -15.970   3.253 -23.875  1.00  0.00      LIG  
ATOM   9523 O    LIG     1     -15.813   2.843 -25.014  1.00  0.00      LIG  
ATOM   9524 N    LIG     1     -17.158   3.725 -23.365  1.00  0.00      LIG  
ATOM   9525 C2   LIG     1     -18.346   3.883 -24.190  1.00  0.00      LIG  
ATOM   9526 C3   LIG     1     -19.102   2.572 -24.152  1.00  0.00      LIG  
ATOM   9527 O1   LIG     1     -19.062   1.787 -23.216  1.00  0.00      LIG  
ATOM   9528 C4   LIG     1     -19.265   5.005 -23.685  1.00  0.00      LIG  
ATOM   9529 C5   LIG     1     -18.508   6.239 -23.158  1.00  0.00      LIG  
ATOM   9530 C6   LIG     1     -17.584   6.958 -24.171  1.00  0.00      LIG  
ATOM   9531 C7   LIG     1     -18.226   7.668 -25.369  1.00  0.00      LIG  
ATOM   9532 O2   LIG     1     -19.309   8.521 -25.014  1.00  0.00      LIG  
ATOM   9533 O3   LIG     1     -16.785   7.908 -23.462  1.00  0.00      LIG  
ATOM   9534 O4   LIG     1     -19.451   7.133 -22.566  1.00  0.00      LIG  
ATOM   9535 O5   LIG     1     -20.157   5.370 -24.739  1.00  0.00      LIG  
ATOM   9536 H    LIG     1     -14.159   4.160 -23.252  1.00  0.00      LIG  
ATOM   9537 H1   LIG     1     -14.306   2.419 -22.871  1.00  0.00      LIG  
ATOM   9538 H2   LIG     1     -15.186   3.622 -21.900  1.00  0.00      LIG  
ATOM   9539 H3   LIG     1     -17.221   3.900 -22.368  1.00  0.00      LIG  
ATOM   9540 H4   LIG     1     -18.045   4.049 -25.230  1.00  0.00      LIG  
ATOM   9541 H5   LIG     1     -19.852   2.449 -24.948  1.00  0.00      LIG  
ATOM   9542 H6   LIG     1     -19.901   4.636 -22.872  1.00  0.00      LIG  
ATOM   9543 H7   LIG     1     -17.882   5.923 -22.319  1.00  0.00      LIG  
ATOM   9544 H8   LIG     1     -16.875   6.231 -24.573  1.00  0.00      LIG  
ATOM   9545 H9   LIG     1     -18.605   6.937 -26.087  1.00  0.00      LIG  
ATOM   9546 H10  LIG     1     -17.484   8.287 -25.882  1.00  0.00      LIG  
ATOM   9547 H11  LIG     1     -19.089   8.926 -24.152  1.00  0.00      LIG  
ATOM   9548 H12  LIG     1     -17.405   8.556 -23.070  1.00  0.00      LIG  
ATOM   9549 H13  LIG     1     -19.988   6.613 -21.945  1.00  0.00      LIG  
ATOM   9550 H14  LIG     1     -20.500   6.254 -24.514  1.00  0.00      LIG  
TER
REMARK  Energy: 10.3281
REMARK  SimpleFitness: 10.3281
REMARK  FullFitness: -2622.4084
REMARK  InterFull: -28.5147
REMARK  IntraFull: 67.2543
REMARK  solvFull: -3062.77
REMARK  surfFull: 401.622
REMARK  extraFull: 0.0
REMARK  deltaGcompsolvpol: -3062.77
REMARK  deltaGcompsolvnonpol: 401.622
REMARK  deltaGprotsolvpol: -3070.97
REMARK  deltaGprotsolvnonpol: 403.01
REMARK  deltaGligsolvpol: -15.1227
REMARK  deltaGligsolvnonpol: 6.90277
REMARK  deltaGvdw: -28.5147
REMARK  deltaGelec: 0.0
REMARK  deltaG: -6.044451
REMARK  Cluster: 5
REMARK  ClusterRank: 5
ATOM   9521 C    LIG     1     -15.933   1.437 -23.892  1.00  0.00      LIG  
ATOM   9522 C1   LIG     1     -17.241   1.947 -24.414  1.00  0.00      LIG  
ATOM   9523 O    LIG     1     -17.772   1.481 -25.410  1.00  0.00      LIG  
ATOM   9524 N    LIG     1     -17.788   2.914 -23.601  1.00  0.00      LIG  
ATOM   9525 C2   LIG     1     -19.099   3.498 -23.847  1.00  0.00      LIG  
ATOM   9526 C3   LIG     1     -20.009   2.863 -22.828  1.00  0.00      LIG  
ATOM   9527 O1   LIG     1     -20.063   3.231 -21.663  1.00  0.00      LIG  
ATOM   9528 C4   LIG     1     -19.135   5.033 -23.704  1.00  0.00      LIG  
ATOM   9529 C5   LIG     1     -18.116   5.594 -22.693  1.00  0.00      LIG  
ATOM   9530 C6   LIG     1     -16.732   5.936 -23.290  1.00  0.00      LIG  
ATOM   9531 C7   LIG     1     -16.467   7.424 -23.531  1.00  0.00      LIG  
ATOM   9532 O2   LIG     1     -17.410   8.004 -24.422  1.00  0.00      LIG  
ATOM   9533 O3   LIG     1     -15.730   5.480 -22.382  1.00  0.00      LIG  
ATOM   9534 O4   LIG     1     -18.671   6.752 -22.072  1.00  0.00      LIG  
ATOM   9535 O5   LIG     1     -18.946   5.608 -24.995  1.00  0.00      LIG  
ATOM   9536 H    LIG     1     -15.327   1.099 -24.736  1.00  0.00      LIG  
ATOM   9537 H1   LIG     1     -16.118   0.602 -23.210  1.00  0.00      LIG  
ATOM   9538 H2   LIG     1     -15.387   2.227 -23.364  1.00  0.00      LIG  
ATOM   9539 H3   LIG     1     -17.295   3.159 -22.749  1.00  0.00      LIG  
ATOM   9540 H4   LIG     1     -19.463   3.196 -24.835  1.00  0.00      LIG  
ATOM   9541 H5   LIG     1     -20.408   1.877 -23.114  1.00  0.00      LIG  
ATOM   9542 H6   LIG     1     -20.144   5.340 -23.407  1.00  0.00      LIG  
ATOM   9543 H7   LIG     1     -18.011   4.870 -21.880  1.00  0.00      LIG  
ATOM   9544 H8   LIG     1     -16.583   5.375 -24.216  1.00  0.00      LIG  
ATOM   9545 H9   LIG     1     -15.470   7.557 -23.960  1.00  0.00      LIG  
ATOM   9546 H10  LIG     1     -16.474   7.987 -22.593  1.00  0.00      LIG  
ATOM   9547 H11  LIG     1     -17.938   8.624 -23.880  1.00  0.00      LIG  
ATOM   9548 H12  LIG     1     -15.817   6.020 -21.578  1.00  0.00      LIG  
ATOM   9549 H13  LIG     1     -19.576   6.522 -21.800  1.00  0.00      LIG  
ATOM   9550 H14  LIG     1     -18.661   6.531 -24.854  1.00  0.00      LIG  
TER
REMARK  Energy: 14.8419
REMARK  SimpleFitness: 14.8419
REMARK  FullFitness: -2621.2864
REMARK  InterFull: -35.7065
REMARK  IntraFull: 81.5982
REMARK  solvFull: -3068.65
REMARK  surfFull: 401.472
REMARK  extraFull: 0.0
REMARK  deltaGcompsolvpol: -3068.65
REMARK  deltaGcompsolvnonpol: 401.472
REMARK  deltaGprotsolvpol: -3070.97
REMARK  deltaGprotsolvnonpol: 403.01
REMARK  deltaGligsolvpol: -20.9971
REMARK  deltaGligsolvnonpol: 6.90138
REMARK  deltaGvdw: -35.7065
REMARK  deltaGelec: 0.0
REMARK  deltaG: -6.739192
REMARK  Cluster: 5
REMARK  ClusterRank: 6
ATOM   9521 C    LIG     1     -16.342   2.140 -24.022  1.00  0.00      LIG  
ATOM   9522 C1   LIG     1     -17.160   2.731 -25.132  1.00  0.00      LIG  
ATOM   9523 O    LIG     1     -17.162   2.210 -26.237  1.00  0.00      LIG  
ATOM   9524 N    LIG     1     -17.917   3.859 -24.861  1.00  0.00      LIG  
ATOM   9525 C2   LIG     1     -17.966   4.722 -23.677  1.00  0.00      LIG  
ATOM   9526 C3   LIG     1     -18.736   4.064 -22.546  1.00  0.00      LIG  
ATOM   9527 O1   LIG     1     -19.539   3.156 -22.705  1.00  0.00      LIG  
ATOM   9528 C4   LIG     1     -16.615   5.384 -23.293  1.00  0.00      LIG  
ATOM   9529 C5   LIG     1     -16.723   6.875 -22.925  1.00  0.00      LIG  
ATOM   9530 C6   LIG     1     -16.436   7.800 -24.120  1.00  0.00      LIG  
ATOM   9531 C7   LIG     1     -17.575   7.955 -25.129  1.00  0.00      LIG  
ATOM   9532 O2   LIG     1     -17.582   6.878 -26.059  1.00  0.00      LIG  
ATOM   9533 O3   LIG     1     -16.118   9.097 -23.618  1.00  0.00      LIG  
ATOM   9534 O4   LIG     1     -17.993   7.167 -22.340  1.00  0.00      LIG  
ATOM   9535 O5   LIG     1     -15.977   4.702 -22.205  1.00  0.00      LIG  
ATOM   9536 H    LIG     1     -16.109   1.103 -24.281  1.00  0.00      LIG  
ATOM   9537 H1   LIG     1     -16.898   2.140 -23.082  1.00  0.00      LIG  
ATOM   9538 H2   LIG     1     -15.410   2.700 -23.916  1.00  0.00      LIG  
ATOM   9539 H3   LIG     1     -18.453   4.194 -25.654  1.00  0.00      LIG  
ATOM   9540 H4   LIG     1     -18.628   5.521 -24.016  1.00  0.00      LIG  
ATOM   9541 H5   LIG     1     -18.720   4.618 -21.595  1.00  0.00      LIG  
ATOM   9542 H6   LIG     1     -15.916   5.303 -24.130  1.00  0.00      LIG  
ATOM   9543 H7   LIG     1     -15.990   7.106 -22.144  1.00  0.00      LIG  
ATOM   9544 H8   LIG     1     -15.541   7.436 -24.628  1.00  0.00      LIG  
ATOM   9545 H9   LIG     1     -17.463   8.883 -25.699  1.00  0.00      LIG  
ATOM   9546 H10  LIG     1     -18.549   8.002 -24.637  1.00  0.00      LIG  
ATOM   9547 H11  LIG     1     -16.669   6.762 -26.375  1.00  0.00      LIG  
ATOM   9548 H12  LIG     1     -16.941   9.465 -23.235  1.00  0.00      LIG  
ATOM   9549 H13  LIG     1     -18.118   8.136 -22.379  1.00  0.00      LIG  
ATOM   9550 H14  LIG     1     -15.178   5.209 -21.982  1.00  0.00      LIG  
TER
REMARK  Energy: 12.4099
REMARK  SimpleFitness: 12.4099
REMARK  FullFitness: -2618.559
REMARK  InterFull: -35.1889
REMARK  IntraFull: 78.7169
REMARK  solvFull: -3063.62
REMARK  surfFull: 401.533
REMARK  extraFull: 0.0
REMARK  deltaGcompsolvpol: -3063.62
REMARK  deltaGcompsolvnonpol: 401.533
REMARK  deltaGprotsolvpol: -3070.97
REMARK  deltaGprotsolvnonpol: 403.01
REMARK  deltaGligsolvpol: -21.2417
REMARK  deltaGligsolvnonpol: 6.89601
REMARK  deltaGvdw: -35.1889
REMARK  deltaGelec: 0.0
REMARK  deltaG: -6.3611555
REMARK  Cluster: 5
REMARK  ClusterRank: 7
ATOM   9521 C    LIG     1     -18.159   2.595 -24.928  1.00  0.00      LIG  
ATOM   9522 C1   LIG     1     -17.280   2.619 -23.714  1.00  0.00      LIG  
ATOM   9523 O    LIG     1     -16.392   1.795 -23.559  1.00  0.00      LIG  
ATOM   9524 N    LIG     1     -17.495   3.643 -22.812  1.00  0.00      LIG  
ATOM   9525 C2   LIG     1     -18.535   4.671 -22.863  1.00  0.00      LIG  
ATOM   9526 C3   LIG     1     -19.316   4.419 -21.592  1.00  0.00      LIG  
ATOM   9527 O1   LIG     1     -20.434   4.876 -21.407  1.00  0.00      LIG  
ATOM   9528 C4   LIG     1     -17.972   6.110 -22.889  1.00  0.00      LIG  
ATOM   9529 C5   LIG     1     -16.953   6.300 -24.033  1.00  0.00      LIG  
ATOM   9530 C6   LIG     1     -16.609   7.747 -24.419  1.00  0.00      LIG  
ATOM   9531 C7   LIG     1     -17.644   8.429 -25.311  1.00  0.00      LIG  
ATOM   9532 O2   LIG     1     -17.856   7.677 -26.500  1.00  0.00      LIG  
ATOM   9533 O3   LIG     1     -16.353   8.539 -23.259  1.00  0.00      LIG  
ATOM   9534 O4   LIG     1     -15.722   5.679 -23.657  1.00  0.00      LIG  
ATOM   9535 O5   LIG     1     -19.078   6.999 -23.043  1.00  0.00      LIG  
ATOM   9536 H    LIG     1     -17.858   1.757 -25.562  1.00  0.00      LIG  
ATOM   9537 H1   LIG     1     -18.045   3.526 -25.491  1.00  0.00      LIG  
ATOM   9538 H2   LIG     1     -19.202   2.456 -24.630  1.00  0.00      LIG  
ATOM   9539 H3   LIG     1     -16.895   3.632 -21.993  1.00  0.00      LIG  
ATOM   9540 H4   LIG     1     -19.227   4.516 -23.693  1.00  0.00      LIG  
ATOM   9541 H5   LIG     1     -18.712   4.144 -20.714  1.00  0.00      LIG  
ATOM   9542 H6   LIG     1     -17.495   6.340 -21.933  1.00  0.00      LIG  
ATOM   9543 H7   LIG     1     -17.311   5.777 -24.924  1.00  0.00      LIG  
ATOM   9544 H8   LIG     1     -15.669   7.722 -24.978  1.00  0.00      LIG  
ATOM   9545 H9   LIG     1     -17.301   9.429 -25.587  1.00  0.00      LIG  
ATOM   9546 H10  LIG     1     -18.602   8.569 -24.811  1.00  0.00      LIG  
ATOM   9547 H11  LIG     1     -18.120   6.782 -26.226  1.00  0.00      LIG  
ATOM   9548 H12  LIG     1     -17.162   9.057 -23.070  1.00  0.00      LIG  
ATOM   9549 H13  LIG     1     -15.924   4.740 -23.499  1.00  0.00      LIG  
ATOM   9550 H14  LIG     1     -18.756   7.906 -22.887  1.00  0.00      LIG  
TER
REMARK  Energy: 17.9316
REMARK  SimpleFitness: 17.9316
REMARK  FullFitness: -2616.8145
REMARK  InterFull: -35.6181
REMARK  IntraFull: 82.3528
REMARK  solvFull: -3065.07
REMARK  surfFull: 401.521
REMARK  extraFull: 0.0
REMARK  deltaGcompsolvpol: -3065.07
REMARK  deltaGcompsolvnonpol: 401.521
REMARK  deltaGprotsolvpol: -3070.97
REMARK  deltaGprotsolvnonpol: 403.01
REMARK  deltaGligsolvpol: -20.9007
REMARK  deltaGligsolvnonpol: 6.87772
REMARK  deltaGvdw: -35.6181
REMARK  deltaGelec: 0.0
REMARK  deltaG: -6.5107684
REMARK  Cluster: 5
REMARK  ClusterRank: 8
ATOM   9521 C    LIG     1     -17.011   2.009 -24.725  1.00  0.00      LIG  
ATOM   9522 C1   LIG     1     -17.394   2.815 -25.932  1.00  0.00      LIG  
ATOM   9523 O    LIG     1     -17.167   2.379 -27.048  1.00  0.00      LIG  
ATOM   9524 N    LIG     1     -18.035   4.032 -25.741  1.00  0.00      LIG  
ATOM   9525 C2   LIG     1     -18.317   4.794 -24.519  1.00  0.00      LIG  
ATOM   9526 C3   LIG     1     -19.441   4.136 -23.739  1.00  0.00      LIG  
ATOM   9527 O1   LIG     1     -20.304   3.442 -24.254  1.00  0.00      LIG  
ATOM   9528 C4   LIG     1     -17.064   5.248 -23.722  1.00  0.00      LIG  
ATOM   9529 C5   LIG     1     -17.122   6.703 -23.207  1.00  0.00      LIG  
ATOM   9530 C6   LIG     1     -16.631   7.746 -24.233  1.00  0.00      LIG  
ATOM   9531 C7   LIG     1     -17.664   8.220 -25.257  1.00  0.00      LIG  
ATOM   9532 O2   LIG     1     -17.636   7.382 -26.407  1.00  0.00      LIG  
ATOM   9533 O3   LIG     1     -16.177   8.898 -23.524  1.00  0.00      LIG  
ATOM   9534 O4   LIG     1     -18.437   7.023 -22.748  1.00  0.00      LIG  
ATOM   9535 O5   LIG     1     -16.813   4.386 -22.603  1.00  0.00      LIG  
ATOM   9536 H    LIG     1     -16.794   0.988 -25.055  1.00  0.00      LIG  
ATOM   9537 H1   LIG     1     -17.826   1.966 -24.003  1.00  0.00      LIG  
ATOM   9538 H2   LIG     1     -16.116   2.432 -24.266  1.00  0.00      LIG  
ATOM   9539 H3   LIG     1     -18.274   4.508 -26.605  1.00  0.00      LIG  
ATOM   9540 H4   LIG     1     -18.783   5.701 -24.902  1.00  0.00      LIG  
ATOM   9541 H5   LIG     1     -19.603   4.528 -22.726  1.00  0.00      LIG  
ATOM   9542 H6   LIG     1     -16.178   5.158 -24.357  1.00  0.00      LIG  
ATOM   9543 H7   LIG     1     -16.475   6.776 -22.324  1.00  0.00      LIG  
ATOM   9544 H8   LIG     1     -15.759   7.341 -24.747  1.00  0.00      LIG  
ATOM   9545 H9   LIG     1     -17.450   9.243 -25.583  1.00  0.00      LIG  
ATOM   9546 H10  LIG     1     -18.676   8.231 -24.848  1.00  0.00      LIG  
ATOM   9547 H11  LIG     1     -16.703   7.274 -26.654  1.00  0.00      LIG  
ATOM   9548 H12  LIG     1     -16.976   9.380 -23.229  1.00  0.00      LIG  
ATOM   9549 H13  LIG     1     -18.465   7.985 -22.583  1.00  0.00      LIG  
ATOM   9550 H14  LIG     1     -16.058   4.762 -22.119  1.00  0.00      LIG  
TER
REMARK  Energy: 0.321219
REMARK  SimpleFitness: 0.321219
REMARK  FullFitness: -2633.4988
REMARK  InterFull: -28.4378
REMARK  IntraFull: 62.7871
REMARK  solvFull: -3069.57
REMARK  surfFull: 401.722
REMARK  extraFull: 0.0
REMARK  deltaGcompsolvpol: -3069.57
REMARK  deltaGcompsolvnonpol: 401.722
REMARK  deltaGprotsolvpol: -3070.97
REMARK  deltaGprotsolvnonpol: 403.01
REMARK  deltaGligsolvpol: -16.9773
REMARK  deltaGligsolvnonpol: 6.7402
REMARK  deltaGvdw: -28.4378
REMARK  deltaGelec: 0.0
REMARK  deltaG: -6.3150015
REMARK  Cluster: 6
REMARK  ClusterRank: 0
ATOM   9521 C    LIG     1     -15.761   1.821 -26.363  1.00  0.00      LIG  
ATOM   9522 C1   LIG     1     -16.153   2.018 -24.929  1.00  0.00      LIG  
ATOM   9523 O    LIG     1     -16.829   1.200 -24.325  1.00  0.00      LIG  
ATOM   9524 N    LIG     1     -15.722   3.219 -24.415  1.00  0.00      LIG  
ATOM   9525 C2   LIG     1     -16.060   3.649 -23.063  1.00  0.00      LIG  
ATOM   9526 C3   LIG     1     -14.808   4.183 -22.420  1.00  0.00      LIG  
ATOM   9527 O1   LIG     1     -13.859   4.639 -23.043  1.00  0.00      LIG  
ATOM   9528 C4   LIG     1     -17.207   4.676 -23.006  1.00  0.00      LIG  
ATOM   9529 C5   LIG     1     -17.171   5.725 -24.134  1.00  0.00      LIG  
ATOM   9530 C6   LIG     1     -18.311   6.746 -24.057  1.00  0.00      LIG  
ATOM   9531 C7   LIG     1     -18.126   7.883 -25.064  1.00  0.00      LIG  
ATOM   9532 O2   LIG     1     -17.838   7.384 -26.368  1.00  0.00      LIG  
ATOM   9533 O3   LIG     1     -19.572   6.123 -24.299  1.00  0.00      LIG  
ATOM   9534 O4   LIG     1     -15.945   6.449 -24.063  1.00  0.00      LIG  
ATOM   9535 O5   LIG     1     -18.436   3.955 -23.017  1.00  0.00      LIG  
ATOM   9536 H    LIG     1     -16.587   2.136 -27.007  1.00  0.00      LIG  
ATOM   9537 H1   LIG     1     -15.548   0.761 -26.525  1.00  0.00      LIG  
ATOM   9538 H2   LIG     1     -14.865   2.397 -26.612  1.00  0.00      LIG  
ATOM   9539 H3   LIG     1     -15.203   3.848 -25.023  1.00  0.00      LIG  
ATOM   9540 H4   LIG     1     -16.333   2.761 -22.485  1.00  0.00      LIG  
ATOM   9541 H5   LIG     1     -14.860   4.291 -21.328  1.00  0.00      LIG  
ATOM   9542 H6   LIG     1     -17.166   5.202 -22.048  1.00  0.00      LIG  
ATOM   9543 H7   LIG     1     -17.227   5.216 -25.100  1.00  0.00      LIG  
ATOM   9544 H8   LIG     1     -18.349   7.179 -23.054  1.00  0.00      LIG  
ATOM   9545 H9   LIG     1     -17.300   8.535 -24.769  1.00  0.00      LIG  
ATOM   9546 H10  LIG     1     -19.035   8.488 -25.135  1.00  0.00      LIG  
ATOM   9547 H11  LIG     1     -17.053   6.816 -26.277  1.00  0.00      LIG  
ATOM   9548 H12  LIG     1     -20.222   6.841 -24.383  1.00  0.00      LIG  
ATOM   9549 H13  LIG     1     -15.229   5.790 -24.003  1.00  0.00      LIG  
ATOM   9550 H14  LIG     1     -19.115   4.572 -23.349  1.00  0.00      LIG  
TER
REMARK  Energy: 0.523887
REMARK  SimpleFitness: 0.523887
REMARK  FullFitness: -2633.0796
REMARK  InterFull: -26.1901
REMARK  IntraFull: 61.9335
REMARK  solvFull: -3070.54
REMARK  surfFull: 401.717
REMARK  extraFull: 0.0
REMARK  deltaGcompsolvpol: -3070.54
REMARK  deltaGcompsolvnonpol: 401.717
REMARK  deltaGprotsolvpol: -3070.97
REMARK  deltaGprotsolvnonpol: 403.01
REMARK  deltaGligsolvpol: -16.2949
REMARK  deltaGligsolvnonpol: 6.73978
REMARK  deltaGvdw: -26.1901
REMARK  deltaGelec: 0.0
REMARK  deltaG: -6.2039247
REMARK  Cluster: 6
REMARK  ClusterRank: 1
ATOM   9521 C    LIG     1     -15.788   1.811 -26.320  1.00  0.00      LIG  
ATOM   9522 C1   LIG     1     -16.188   2.031 -24.892  1.00  0.00      LIG  
ATOM   9523 O    LIG     1     -16.844   1.211 -24.269  1.00  0.00      LIG  
ATOM   9524 N    LIG     1     -15.799   3.260 -24.411  1.00  0.00      LIG  
ATOM   9525 C2   LIG     1     -16.155   3.720 -23.074  1.00  0.00      LIG  
ATOM   9526 C3   LIG     1     -14.908   4.255 -22.423  1.00  0.00      LIG  
ATOM   9527 O1   LIG     1     -13.942   4.682 -23.041  1.00  0.00      LIG  
ATOM   9528 C4   LIG     1     -17.294   4.758 -23.060  1.00  0.00      LIG  
ATOM   9529 C5   LIG     1     -17.230   5.778 -24.212  1.00  0.00      LIG  
ATOM   9530 C6   LIG     1     -18.396   6.774 -24.207  1.00  0.00      LIG  
ATOM   9531 C7   LIG     1     -18.176   7.918 -25.197  1.00  0.00      LIG  
ATOM   9532 O2   LIG     1     -17.816   7.416 -26.483  1.00  0.00      LIG  
ATOM   9533 O3   LIG     1     -19.617   6.119 -24.548  1.00  0.00      LIG  
ATOM   9534 O4   LIG     1     -16.018   6.521 -24.111  1.00  0.00      LIG  
ATOM   9535 O5   LIG     1     -18.529   4.047 -23.071  1.00  0.00      LIG  
ATOM   9536 H    LIG     1     -16.608   2.121 -26.974  1.00  0.00      LIG  
ATOM   9537 H1   LIG     1     -15.579   0.749 -26.466  1.00  0.00      LIG  
ATOM   9538 H2   LIG     1     -14.887   2.380 -26.569  1.00  0.00      LIG  
ATOM   9539 H3   LIG     1     -15.286   3.882 -25.032  1.00  0.00      LIG  
ATOM   9540 H4   LIG     1     -16.447   2.847 -22.483  1.00  0.00      LIG  
ATOM   9541 H5   LIG     1     -14.976   4.387 -21.334  1.00  0.00      LIG  
ATOM   9542 H6   LIG     1     -17.263   5.306 -22.114  1.00  0.00      LIG  
ATOM   9543 H7   LIG     1     -17.237   5.245 -25.167  1.00  0.00      LIG  
ATOM   9544 H8   LIG     1     -18.516   7.198 -23.206  1.00  0.00      LIG  
ATOM   9545 H9   LIG     1     -17.377   8.583 -24.860  1.00  0.00      LIG  
ATOM   9546 H10  LIG     1     -19.089   8.508 -25.317  1.00  0.00      LIG  
ATOM   9547 H11  LIG     1     -16.990   6.914 -26.361  1.00  0.00      LIG  
ATOM   9548 H12  LIG     1     -19.626   6.049 -25.519  1.00  0.00      LIG  
ATOM   9549 H13  LIG     1     -15.298   5.874 -24.002  1.00  0.00      LIG  
ATOM   9550 H14  LIG     1     -19.208   4.674 -23.384  1.00  0.00      LIG  
TER
REMARK  Energy: 0.666101
REMARK  SimpleFitness: 0.666101
REMARK  FullFitness: -2632.8584
REMARK  InterFull: -29.4482
REMARK  IntraFull: 65.019
REMARK  solvFull: -3070.12
REMARK  surfFull: 401.691
REMARK  extraFull: 0.0
REMARK  deltaGcompsolvpol: -3070.12
REMARK  deltaGcompsolvnonpol: 401.691
REMARK  deltaGprotsolvpol: -3070.97
REMARK  deltaGprotsolvnonpol: 403.01
REMARK  deltaGligsolvpol: -19.3557
REMARK  deltaGligsolvnonpol: 6.72323
REMARK  deltaGvdw: -29.4482
REMARK  deltaGelec: 0.0
REMARK  deltaG: -6.300015
REMARK  Cluster: 6
REMARK  ClusterRank: 2
ATOM   9521 C    LIG     1     -15.888   1.847 -26.177  1.00  0.00      LIG  
ATOM   9522 C1   LIG     1     -16.291   2.157 -24.766  1.00  0.00      LIG  
ATOM   9523 O    LIG     1     -17.010   1.411 -24.119  1.00  0.00      LIG  
ATOM   9524 N    LIG     1     -15.819   3.372 -24.329  1.00  0.00      LIG  
ATOM   9525 C2   LIG     1     -16.150   3.903 -23.013  1.00  0.00      LIG  
ATOM   9526 C3   LIG     1     -14.920   4.555 -22.437  1.00  0.00      LIG  
ATOM   9527 O1   LIG     1     -13.780   4.353 -22.833  1.00  0.00      LIG  
ATOM   9528 C4   LIG     1     -17.337   4.887 -23.022  1.00  0.00      LIG  
ATOM   9529 C5   LIG     1     -17.397   5.816 -24.247  1.00  0.00      LIG  
ATOM   9530 C6   LIG     1     -18.493   6.878 -24.110  1.00  0.00      LIG  
ATOM   9531 C7   LIG     1     -18.386   7.967 -25.179  1.00  0.00      LIG  
ATOM   9532 O2   LIG     1     -18.225   7.406 -26.479  1.00  0.00      LIG  
ATOM   9533 O3   LIG     1     -19.785   6.276 -24.190  1.00  0.00      LIG  
ATOM   9534 O4   LIG     1     -16.154   6.492 -24.398  1.00  0.00      LIG  
ATOM   9535 O5   LIG     1     -18.541   4.133 -22.909  1.00  0.00      LIG  
ATOM   9536 H    LIG     1     -16.688   2.156 -26.855  1.00  0.00      LIG  
ATOM   9537 H1   LIG     1     -15.720   0.771 -26.266  1.00  0.00      LIG  
ATOM   9538 H2   LIG     1     -14.962   2.366 -26.447  1.00  0.00      LIG  
ATOM   9539 H3   LIG     1     -15.247   3.924 -24.963  1.00  0.00      LIG  
ATOM   9540 H4   LIG     1     -16.383   3.063 -22.352  1.00  0.00      LIG  
ATOM   9541 H5   LIG     1     -15.085   5.089 -21.490  1.00  0.00      LIG  
ATOM   9542 H6   LIG     1     -17.286   5.513 -22.127  1.00  0.00      LIG  
ATOM   9543 H7   LIG     1     -17.588   5.224 -25.147  1.00  0.00      LIG  
ATOM   9544 H8   LIG     1     -18.420   7.354 -23.129  1.00  0.00      LIG  
ATOM   9545 H9   LIG     1     -17.527   8.615 -24.988  1.00  0.00      LIG  
ATOM   9546 H10  LIG     1     -19.288   8.585 -25.195  1.00  0.00      LIG  
ATOM   9547 H11  LIG     1     -17.443   6.830 -26.434  1.00  0.00      LIG  
ATOM   9548 H12  LIG     1     -20.426   7.007 -24.242  1.00  0.00      LIG  
ATOM   9549 H13  LIG     1     -15.597   5.911 -24.947  1.00  0.00      LIG  
ATOM   9550 H14  LIG     1     -19.260   4.716 -23.217  1.00  0.00      LIG  
TER
REMARK  Energy: 4.19021
REMARK  SimpleFitness: 4.19021
REMARK  FullFitness: -2631.2046
REMARK  InterFull: -27.9664
REMARK  IntraFull: 65.0847
REMARK  solvFull: -3070.23
REMARK  surfFull: 401.907
REMARK  extraFull: 0.0
REMARK  deltaGcompsolvpol: -3070.23
REMARK  deltaGcompsolvnonpol: 401.907
REMARK  deltaGprotsolvpol: -3070.97
REMARK  deltaGprotsolvnonpol: 403.01
REMARK  deltaGligsolvpol: -16.6294
REMARK  deltaGligsolvnonpol: 6.75049
REMARK  deltaGvdw: -27.9664
REMARK  deltaGelec: 0.0
REMARK  deltaG: -6.3155546
REMARK  Cluster: 6
REMARK  ClusterRank: 3
ATOM   9521 C    LIG     1     -15.984   2.016 -26.238  1.00  0.00      LIG  
ATOM   9522 C1   LIG     1     -16.413   2.336 -24.837  1.00  0.00      LIG  
ATOM   9523 O    LIG     1     -17.315   1.731 -24.279  1.00  0.00      LIG  
ATOM   9524 N    LIG     1     -15.747   3.411 -24.298  1.00  0.00      LIG  
ATOM   9525 C2   LIG     1     -16.060   3.914 -22.970  1.00  0.00      LIG  
ATOM   9526 C3   LIG     1     -14.812   4.516 -22.379  1.00  0.00      LIG  
ATOM   9527 O1   LIG     1     -13.676   4.210 -22.713  1.00  0.00      LIG  
ATOM   9528 C4   LIG     1     -17.230   4.917 -22.947  1.00  0.00      LIG  
ATOM   9529 C5   LIG     1     -17.238   5.922 -24.120  1.00  0.00      LIG  
ATOM   9530 C6   LIG     1     -18.360   6.978 -24.089  1.00  0.00      LIG  
ATOM   9531 C7   LIG     1     -19.484   6.699 -25.083  1.00  0.00      LIG  
ATOM   9532 O2   LIG     1     -19.968   5.367 -24.986  1.00  0.00      LIG  
ATOM   9533 O3   LIG     1     -18.895   7.133 -22.775  1.00  0.00      LIG  
ATOM   9534 O4   LIG     1     -16.003   6.637 -24.103  1.00  0.00      LIG  
ATOM   9535 O5   LIG     1     -18.445   4.171 -22.900  1.00  0.00      LIG  
ATOM   9536 H    LIG     1     -14.957   2.350 -26.421  1.00  0.00      LIG  
ATOM   9537 H1   LIG     1     -16.658   2.511 -26.941  1.00  0.00      LIG  
ATOM   9538 H2   LIG     1     -16.027   0.933 -26.381  1.00  0.00      LIG  
ATOM   9539 H3   LIG     1     -15.093   3.927 -24.882  1.00  0.00      LIG  
ATOM   9540 H4   LIG     1     -16.312   3.058 -22.337  1.00  0.00      LIG  
ATOM   9541 H5   LIG     1     -14.974   5.089 -21.455  1.00  0.00      LIG  
ATOM   9542 H6   LIG     1     -17.177   5.480 -22.012  1.00  0.00      LIG  
ATOM   9543 H7   LIG     1     -17.285   5.397 -25.077  1.00  0.00      LIG  
ATOM   9544 H8   LIG     1     -17.954   7.960 -24.352  1.00  0.00      LIG  
ATOM   9545 H9   LIG     1     -19.126   6.844 -26.105  1.00  0.00      LIG  
ATOM   9546 H10  LIG     1     -20.329   7.371 -24.908  1.00  0.00      LIG  
ATOM   9547 H11  LIG     1     -19.896   5.118 -24.047  1.00  0.00      LIG  
ATOM   9548 H12  LIG     1     -19.096   8.084 -22.675  1.00  0.00      LIG  
ATOM   9549 H13  LIG     1     -16.093   7.353 -24.754  1.00  0.00      LIG  
ATOM   9550 H14  LIG     1     -18.317   3.393 -23.475  1.00  0.00      LIG  
TER
REMARK  Energy: 4.16131
REMARK  SimpleFitness: 4.16131
REMARK  FullFitness: -2630.6
REMARK  InterFull: -29.3055
REMARK  IntraFull: 65.4106
REMARK  solvFull: -3068.58
REMARK  surfFull: 401.875
REMARK  extraFull: 0.0
REMARK  deltaGcompsolvpol: -3068.58
REMARK  deltaGcompsolvnonpol: 401.875
REMARK  deltaGprotsolvpol: -3070.97
REMARK  deltaGprotsolvnonpol: 403.01
REMARK  deltaGligsolvpol: -16.4034
REMARK  deltaGligsolvnonpol: 6.74418
REMARK  deltaGvdw: -29.3055
REMARK  deltaGelec: 0.0
REMARK  deltaG: -6.357522
REMARK  Cluster: 6
REMARK  ClusterRank: 4
ATOM   9521 C    LIG     1     -15.942   2.021 -26.285  1.00  0.00      LIG  
ATOM   9522 C1   LIG     1     -16.397   2.327 -24.889  1.00  0.00      LIG  
ATOM   9523 O    LIG     1     -17.312   1.720 -24.355  1.00  0.00      LIG  
ATOM   9524 N    LIG     1     -15.736   3.393 -24.324  1.00  0.00      LIG  
ATOM   9525 C2   LIG     1     -16.072   3.880 -22.995  1.00  0.00      LIG  
ATOM   9526 C3   LIG     1     -14.826   4.441 -22.361  1.00  0.00      LIG  
ATOM   9527 O1   LIG     1     -13.688   4.144 -22.695  1.00  0.00      LIG  
ATOM   9528 C4   LIG     1     -17.220   4.909 -22.985  1.00  0.00      LIG  
ATOM   9529 C5   LIG     1     -17.146   5.958 -24.119  1.00  0.00      LIG  
ATOM   9530 C6   LIG     1     -18.269   7.012 -24.134  1.00  0.00      LIG  
ATOM   9531 C7   LIG     1     -19.337   6.758 -25.195  1.00  0.00      LIG  
ATOM   9532 O2   LIG     1     -19.827   5.426 -25.162  1.00  0.00      LIG  
ATOM   9533 O3   LIG     1     -18.871   7.140 -22.847  1.00  0.00      LIG  
ATOM   9534 O4   LIG     1     -15.922   6.678 -23.973  1.00  0.00      LIG  
ATOM   9535 O5   LIG     1     -18.451   4.188 -23.019  1.00  0.00      LIG  
ATOM   9536 H    LIG     1     -14.915   2.362 -26.450  1.00  0.00      LIG  
ATOM   9537 H1   LIG     1     -16.608   2.518 -26.996  1.00  0.00      LIG  
ATOM   9538 H2   LIG     1     -15.977   0.939 -26.438  1.00  0.00      LIG  
ATOM   9539 H3   LIG     1     -15.071   3.914 -24.889  1.00  0.00      LIG  
ATOM   9540 H4   LIG     1     -16.362   3.018 -22.385  1.00  0.00      LIG  
ATOM   9541 H5   LIG     1     -14.997   4.980 -21.418  1.00  0.00      LIG  
ATOM   9542 H6   LIG     1     -17.197   5.434 -22.027  1.00  0.00      LIG  
ATOM   9543 H7   LIG     1     -17.118   5.471 -25.097  1.00  0.00      LIG  
ATOM   9544 H8   LIG     1     -17.849   7.998 -24.354  1.00  0.00      LIG  
ATOM   9545 H9   LIG     1     -18.922   6.929 -26.192  1.00  0.00      LIG  
ATOM   9546 H10  LIG     1     -20.189   7.428 -25.051  1.00  0.00      LIG  
ATOM   9547 H11  LIG     1     -19.799   5.148 -24.228  1.00  0.00      LIG  
ATOM   9548 H12  LIG     1     -19.136   8.077 -22.763  1.00  0.00      LIG  
ATOM   9549 H13  LIG     1     -16.075   7.338 -23.274  1.00  0.00      LIG  
ATOM   9550 H14  LIG     1     -18.308   3.417 -23.600  1.00  0.00      LIG  
TER
REMARK  Energy: 3.1255
REMARK  SimpleFitness: 3.1255
REMARK  FullFitness: -2630.399
REMARK  InterFull: -38.0771
REMARK  IntraFull: 71.1521
REMARK  solvFull: -3064.93
REMARK  surfFull: 401.456
REMARK  extraFull: 0.0
REMARK  deltaGcompsolvpol: -3064.93
REMARK  deltaGcompsolvnonpol: 401.456
REMARK  deltaGprotsolvpol: -3070.97
REMARK  deltaGprotsolvnonpol: 403.01
REMARK  deltaGligsolvpol: -19.6183
REMARK  deltaGligsolvnonpol: 6.76433
REMARK  deltaGvdw: -38.0771
REMARK  deltaGelec: 0.0
REMARK  deltaG: -6.808719
REMARK  Cluster: 6
REMARK  ClusterRank: 5
ATOM   9521 C    LIG     1     -16.604   2.348 -25.831  1.00  0.00      LIG  
ATOM   9522 C1   LIG     1     -16.719   2.755 -24.394  1.00  0.00      LIG  
ATOM   9523 O    LIG     1     -16.928   1.947 -23.502  1.00  0.00      LIG  
ATOM   9524 N    LIG     1     -16.463   4.095 -24.201  1.00  0.00      LIG  
ATOM   9525 C2   LIG     1     -16.411   4.694 -22.874  1.00  0.00      LIG  
ATOM   9526 C3   LIG     1     -14.965   4.665 -22.443  1.00  0.00      LIG  
ATOM   9527 O1   LIG     1     -14.012   4.701 -23.208  1.00  0.00      LIG  
ATOM   9528 C4   LIG     1     -16.955   6.137 -22.769  1.00  0.00      LIG  
ATOM   9529 C5   LIG     1     -16.899   6.983 -24.060  1.00  0.00      LIG  
ATOM   9530 C6   LIG     1     -18.237   7.091 -24.815  1.00  0.00      LIG  
ATOM   9531 C7   LIG     1     -18.119   7.958 -26.062  1.00  0.00      LIG  
ATOM   9532 O2   LIG     1     -18.152   9.343 -25.738  1.00  0.00      LIG  
ATOM   9533 O3   LIG     1     -18.674   5.801 -25.231  1.00  0.00      LIG  
ATOM   9534 O4   LIG     1     -16.473   8.299 -23.697  1.00  0.00      LIG  
ATOM   9535 O5   LIG     1     -18.286   6.089 -22.255  1.00  0.00      LIG  
ATOM   9536 H    LIG     1     -17.202   1.447 -25.990  1.00  0.00      LIG  
ATOM   9537 H1   LIG     1     -15.556   2.142 -26.065  1.00  0.00      LIG  
ATOM   9538 H2   LIG     1     -16.980   3.138 -26.488  1.00  0.00      LIG  
ATOM   9539 H3   LIG     1     -16.147   4.637 -25.001  1.00  0.00      LIG  
ATOM   9540 H4   LIG     1     -16.943   4.038 -22.177  1.00  0.00      LIG  
ATOM   9541 H5   LIG     1     -14.808   4.774 -21.361  1.00  0.00      LIG  
ATOM   9542 H6   LIG     1     -16.390   6.655 -21.985  1.00  0.00      LIG  
ATOM   9543 H7   LIG     1     -16.122   6.589 -24.719  1.00  0.00      LIG  
ATOM   9544 H8   LIG     1     -19.000   7.524 -24.161  1.00  0.00      LIG  
ATOM   9545 H9   LIG     1     -18.943   7.759 -26.751  1.00  0.00      LIG  
ATOM   9546 H10  LIG     1     -17.189   7.738 -26.592  1.00  0.00      LIG  
ATOM   9547 H11  LIG     1     -17.593   9.451 -24.948  1.00  0.00      LIG  
ATOM   9548 H12  LIG     1     -19.508   5.930 -25.714  1.00  0.00      LIG  
ATOM   9549 H13  LIG     1     -17.185   8.699 -23.158  1.00  0.00      LIG  
ATOM   9550 H14  LIG     1     -18.627   7.000 -22.261  1.00  0.00      LIG  
TER
REMARK  Energy: 9.39786
REMARK  SimpleFitness: 9.39786
REMARK  FullFitness: -2622.9133
REMARK  InterFull: -29.8061
REMARK  IntraFull: 75.8718
REMARK  solvFull: -3070.77
REMARK  surfFull: 401.791
REMARK  extraFull: 0.0
REMARK  deltaGcompsolvpol: -3070.77
REMARK  deltaGcompsolvnonpol: 401.791
REMARK  deltaGprotsolvpol: -3070.97
REMARK  deltaGprotsolvnonpol: 403.01
REMARK  deltaGligsolvpol: -19.4445
REMARK  deltaGligsolvnonpol: 6.88017
REMARK  deltaGvdw: -29.8061
REMARK  deltaGelec: 0.0
REMARK  deltaG: -6.3736005
REMARK  Cluster: 6
REMARK  ClusterRank: 6
ATOM   9521 C    LIG     1     -15.595   1.887 -26.564  1.00  0.00      LIG  
ATOM   9522 C1   LIG     1     -15.932   1.915 -25.105  1.00  0.00      LIG  
ATOM   9523 O    LIG     1     -16.306   0.918 -24.507  1.00  0.00      LIG  
ATOM   9524 N    LIG     1     -15.822   3.174 -24.559  1.00  0.00      LIG  
ATOM   9525 C2   LIG     1     -16.204   3.451 -23.180  1.00  0.00      LIG  
ATOM   9526 C3   LIG     1     -15.228   4.437 -22.596  1.00  0.00      LIG  
ATOM   9527 O1   LIG     1     -14.108   4.644 -23.044  1.00  0.00      LIG  
ATOM   9528 C4   LIG     1     -17.669   3.908 -22.971  1.00  0.00      LIG  
ATOM   9529 C5   LIG     1     -18.260   5.044 -23.836  1.00  0.00      LIG  
ATOM   9530 C6   LIG     1     -17.809   6.445 -23.373  1.00  0.00      LIG  
ATOM   9531 C7   LIG     1     -16.741   7.146 -24.222  1.00  0.00      LIG  
ATOM   9532 O2   LIG     1     -17.177   7.430 -25.548  1.00  0.00      LIG  
ATOM   9533 O3   LIG     1     -18.964   7.281 -23.290  1.00  0.00      LIG  
ATOM   9534 O4   LIG     1     -18.039   4.829 -25.228  1.00  0.00      LIG  
ATOM   9535 O5   LIG     1     -18.511   2.763 -23.114  1.00  0.00      LIG  
ATOM   9536 H    LIG     1     -16.428   2.300 -27.139  1.00  0.00      LIG  
ATOM   9537 H1   LIG     1     -15.419   0.850 -26.862  1.00  0.00      LIG  
ATOM   9538 H2   LIG     1     -14.686   2.464 -26.757  1.00  0.00      LIG  
ATOM   9539 H3   LIG     1     -15.541   3.944 -25.162  1.00  0.00      LIG  
ATOM   9540 H4   LIG     1     -16.060   2.527 -22.610  1.00  0.00      LIG  
ATOM   9541 H5   LIG     1     -15.489   4.800 -21.590  1.00  0.00      LIG  
ATOM   9542 H6   LIG     1     -17.782   4.213 -21.926  1.00  0.00      LIG  
ATOM   9543 H7   LIG     1     -19.348   4.981 -23.726  1.00  0.00      LIG  
ATOM   9544 H8   LIG     1     -17.437   6.363 -22.348  1.00  0.00      LIG  
ATOM   9545 H9   LIG     1     -15.839   6.535 -24.288  1.00  0.00      LIG  
ATOM   9546 H10  LIG     1     -16.474   8.103 -23.766  1.00  0.00      LIG  
ATOM   9547 H11  LIG     1     -17.580   6.604 -25.873  1.00  0.00      LIG  
ATOM   9548 H12  LIG     1     -18.661   8.195 -23.117  1.00  0.00      LIG  
ATOM   9549 H13  LIG     1     -18.184   3.879 -25.383  1.00  0.00      LIG  
ATOM   9550 H14  LIG     1     -19.429   3.066 -23.006  1.00  0.00      LIG  
TER
REMARK  Energy: 9.66157
REMARK  SimpleFitness: 9.66157
REMARK  FullFitness: -2622.4102
REMARK  InterFull: -30.3739
REMARK  IntraFull: 76.2939
REMARK  solvFull: -3070.1
REMARK  surfFull: 401.77
REMARK  extraFull: 0.0
REMARK  deltaGcompsolvpol: -3070.1
REMARK  deltaGcompsolvnonpol: 401.77
REMARK  deltaGprotsolvpol: -3070.97
REMARK  deltaGprotsolvnonpol: 403.01
REMARK  deltaGligsolvpol: -19.9005
REMARK  deltaGligsolvnonpol: 6.91104
REMARK  deltaGvdw: -30.3739
REMARK  deltaGelec: 0.0
REMARK  deltaG: -6.363314
REMARK  Cluster: 6
REMARK  ClusterRank: 7
ATOM   9521 C    LIG     1     -15.749   1.946 -26.506  1.00  0.00      LIG  
ATOM   9522 C1   LIG     1     -16.063   2.008 -25.043  1.00  0.00      LIG  
ATOM   9523 O    LIG     1     -16.343   1.011 -24.397  1.00  0.00      LIG  
ATOM   9524 N    LIG     1     -15.967   3.283 -24.535  1.00  0.00      LIG  
ATOM   9525 C2   LIG     1     -16.322   3.589 -23.157  1.00  0.00      LIG  
ATOM   9526 C3   LIG     1     -15.336   4.592 -22.616  1.00  0.00      LIG  
ATOM   9527 O1   LIG     1     -14.207   4.746 -23.058  1.00  0.00      LIG  
ATOM   9528 C4   LIG     1     -17.786   4.043 -22.932  1.00  0.00      LIG  
ATOM   9529 C5   LIG     1     -18.425   5.106 -23.854  1.00  0.00      LIG  
ATOM   9530 C6   LIG     1     -17.958   6.541 -23.538  1.00  0.00      LIG  
ATOM   9531 C7   LIG     1     -16.872   7.132 -24.448  1.00  0.00      LIG  
ATOM   9532 O2   LIG     1     -17.297   7.289 -25.799  1.00  0.00      LIG  
ATOM   9533 O3   LIG     1     -19.101   7.398 -23.563  1.00  0.00      LIG  
ATOM   9534 O4   LIG     1     -18.292   4.777 -25.235  1.00  0.00      LIG  
ATOM   9535 O5   LIG     1     -18.613   2.879 -22.968  1.00  0.00      LIG  
ATOM   9536 H    LIG     1     -16.047   0.966 -26.887  1.00  0.00      LIG  
ATOM   9537 H1   LIG     1     -14.676   2.088 -26.661  1.00  0.00      LIG  
ATOM   9538 H2   LIG     1     -16.305   2.720 -27.043  1.00  0.00      LIG  
ATOM   9539 H3   LIG     1     -15.722   4.043 -25.167  1.00  0.00      LIG  
ATOM   9540 H4   LIG     1     -16.161   2.682 -22.564  1.00  0.00      LIG  
ATOM   9541 H5   LIG     1     -15.596   5.005 -21.630  1.00  0.00      LIG  
ATOM   9542 H6   LIG     1     -17.870   4.417 -21.907  1.00  0.00      LIG  
ATOM   9543 H7   LIG     1     -19.505   5.055 -23.674  1.00  0.00      LIG  
ATOM   9544 H8   LIG     1     -17.599   6.562 -22.506  1.00  0.00      LIG  
ATOM   9545 H9   LIG     1     -15.982   6.502 -24.447  1.00  0.00      LIG  
ATOM   9546 H10  LIG     1     -16.588   8.125 -24.089  1.00  0.00      LIG  
ATOM   9547 H11  LIG     1     -17.741   6.454 -26.034  1.00  0.00      LIG  
ATOM   9548 H12  LIG     1     -18.800   8.300 -23.329  1.00  0.00      LIG  
ATOM   9549 H13  LIG     1     -18.467   3.822 -25.303  1.00  0.00      LIG  
ATOM   9550 H14  LIG     1     -19.532   3.177 -22.856  1.00  0.00      LIG  
TER
REMARK  Energy: 6.39468
REMARK  SimpleFitness: 6.39468
REMARK  FullFitness: -2633.101
REMARK  InterFull: -26.0307
REMARK  IntraFull: 62.3289
REMARK  solvFull: -3073.04
REMARK  surfFull: 403.641
REMARK  extraFull: 0.0
REMARK  deltaGcompsolvpol: -3073.04
REMARK  deltaGcompsolvnonpol: 403.641
REMARK  deltaGprotsolvpol: -3070.97
REMARK  deltaGprotsolvnonpol: 403.01
REMARK  deltaGligsolvpol: -16.1516
REMARK  deltaGligsolvnonpol: 6.66304
REMARK  deltaGvdw: -26.0307
REMARK  deltaGelec: 0.0
REMARK  deltaG: -6.1613474
REMARK  Cluster: 7
REMARK  ClusterRank: 0
ATOM   9521 C    LIG     1      -8.624   4.658 -57.850  1.00  0.00      LIG  
ATOM   9522 C1   LIG     1      -9.387   4.539 -56.566  1.00  0.00      LIG  
ATOM   9523 O    LIG     1      -9.920   5.502 -56.036  1.00  0.00      LIG  
ATOM   9524 N    LIG     1      -9.357   3.268 -56.042  1.00  0.00      LIG  
ATOM   9525 C2   LIG     1      -9.987   2.947 -54.772  1.00  0.00      LIG  
ATOM   9526 C3   LIG     1     -10.275   1.460 -54.837  1.00  0.00      LIG  
ATOM   9527 O1   LIG     1     -10.458   0.844 -55.878  1.00  0.00      LIG  
ATOM   9528 C4   LIG     1      -9.102   3.386 -53.579  1.00  0.00      LIG  
ATOM   9529 C5   LIG     1      -9.868   3.670 -52.274  1.00  0.00      LIG  
ATOM   9530 C6   LIG     1     -10.839   4.845 -52.399  1.00  0.00      LIG  
ATOM   9531 C7   LIG     1     -11.485   5.207 -51.069  1.00  0.00      LIG  
ATOM   9532 O2   LIG     1     -12.664   4.442 -50.881  1.00  0.00      LIG  
ATOM   9533 O3   LIG     1     -10.151   5.987 -52.891  1.00  0.00      LIG  
ATOM   9534 O4   LIG     1     -10.569   2.516 -51.822  1.00  0.00      LIG  
ATOM   9535 O5   LIG     1      -8.064   2.434 -53.321  1.00  0.00      LIG  
ATOM   9536 H    LIG     1      -9.168   5.330 -58.519  1.00  0.00      LIG  
ATOM   9537 H1   LIG     1      -8.517   3.686 -58.341  1.00  0.00      LIG  
ATOM   9538 H2   LIG     1      -7.633   5.068 -57.638  1.00  0.00      LIG  
ATOM   9539 H3   LIG     1      -8.865   2.535 -56.543  1.00  0.00      LIG  
ATOM   9540 H4   LIG     1     -10.945   3.470 -54.741  1.00  0.00      LIG  
ATOM   9541 H5   LIG     1     -10.554   0.997 -53.879  1.00  0.00      LIG  
ATOM   9542 H6   LIG     1      -8.582   4.307 -53.855  1.00  0.00      LIG  
ATOM   9543 H7   LIG     1      -9.134   3.900 -51.501  1.00  0.00      LIG  
ATOM   9544 H8   LIG     1     -11.619   4.581 -53.111  1.00  0.00      LIG  
ATOM   9545 H9   LIG     1     -11.761   6.265 -51.029  1.00  0.00      LIG  
ATOM   9546 H10  LIG     1     -10.804   5.009 -50.237  1.00  0.00      LIG  
ATOM   9547 H11  LIG     1     -12.414   3.517 -51.050  1.00  0.00      LIG  
ATOM   9548 H12  LIG     1     -10.830   6.670 -53.040  1.00  0.00      LIG  
ATOM   9549 H13  LIG     1      -9.910   1.802 -51.768  1.00  0.00      LIG  
ATOM   9550 H14  LIG     1      -7.380   2.896 -52.798  1.00  0.00      LIG  
TER
REMARK  Energy: 6.39468
REMARK  SimpleFitness: 6.39468
REMARK  FullFitness: -2633.101
REMARK  InterFull: -26.0307
REMARK  IntraFull: 62.3289
REMARK  solvFull: -3073.04
REMARK  surfFull: 403.641
REMARK  extraFull: 0.0
REMARK  deltaGcompsolvpol: -3073.04
REMARK  deltaGcompsolvnonpol: 403.641
REMARK  deltaGprotsolvpol: -3070.97
REMARK  deltaGprotsolvnonpol: 403.01
REMARK  deltaGligsolvpol: -16.1516
REMARK  deltaGligsolvnonpol: 6.66304
REMARK  deltaGvdw: -26.0307
REMARK  deltaGelec: 0.0
REMARK  deltaG: -6.1613474
REMARK  Cluster: 7
REMARK  ClusterRank: 1
ATOM   9521 C    LIG     1      -8.624   4.658 -57.850  1.00  0.00      LIG  
ATOM   9522 C1   LIG     1      -9.387   4.539 -56.566  1.00  0.00      LIG  
ATOM   9523 O    LIG     1      -9.920   5.502 -56.036  1.00  0.00      LIG  
ATOM   9524 N    LIG     1      -9.357   3.268 -56.042  1.00  0.00      LIG  
ATOM   9525 C2   LIG     1      -9.987   2.947 -54.772  1.00  0.00      LIG  
ATOM   9526 C3   LIG     1     -10.275   1.460 -54.837  1.00  0.00      LIG  
ATOM   9527 O1   LIG     1     -10.458   0.844 -55.878  1.00  0.00      LIG  
ATOM   9528 C4   LIG     1      -9.102   3.386 -53.579  1.00  0.00      LIG  
ATOM   9529 C5   LIG     1      -9.868   3.670 -52.274  1.00  0.00      LIG  
ATOM   9530 C6   LIG     1     -10.839   4.845 -52.399  1.00  0.00      LIG  
ATOM   9531 C7   LIG     1     -11.485   5.207 -51.069  1.00  0.00      LIG  
ATOM   9532 O2   LIG     1     -12.664   4.442 -50.881  1.00  0.00      LIG  
ATOM   9533 O3   LIG     1     -10.151   5.987 -52.891  1.00  0.00      LIG  
ATOM   9534 O4   LIG     1     -10.569   2.516 -51.822  1.00  0.00      LIG  
ATOM   9535 O5   LIG     1      -8.064   2.434 -53.321  1.00  0.00      LIG  
ATOM   9536 H    LIG     1      -9.168   5.330 -58.519  1.00  0.00      LIG  
ATOM   9537 H1   LIG     1      -8.517   3.686 -58.341  1.00  0.00      LIG  
ATOM   9538 H2   LIG     1      -7.633   5.068 -57.638  1.00  0.00      LIG  
ATOM   9539 H3   LIG     1      -8.865   2.535 -56.543  1.00  0.00      LIG  
ATOM   9540 H4   LIG     1     -10.945   3.470 -54.741  1.00  0.00      LIG  
ATOM   9541 H5   LIG     1     -10.554   0.997 -53.879  1.00  0.00      LIG  
ATOM   9542 H6   LIG     1      -8.582   4.307 -53.855  1.00  0.00      LIG  
ATOM   9543 H7   LIG     1      -9.134   3.900 -51.501  1.00  0.00      LIG  
ATOM   9544 H8   LIG     1     -11.619   4.581 -53.111  1.00  0.00      LIG  
ATOM   9545 H9   LIG     1     -11.761   6.265 -51.029  1.00  0.00      LIG  
ATOM   9546 H10  LIG     1     -10.804   5.009 -50.237  1.00  0.00      LIG  
ATOM   9547 H11  LIG     1     -12.414   3.517 -51.050  1.00  0.00      LIG  
ATOM   9548 H12  LIG     1     -10.830   6.670 -53.040  1.00  0.00      LIG  
ATOM   9549 H13  LIG     1      -9.910   1.802 -51.768  1.00  0.00      LIG  
ATOM   9550 H14  LIG     1      -7.380   2.896 -52.798  1.00  0.00      LIG  
TER
REMARK  Energy: 6.39468
REMARK  SimpleFitness: 6.39468
REMARK  FullFitness: -2633.101
REMARK  InterFull: -26.0307
REMARK  IntraFull: 62.3289
REMARK  solvFull: -3073.04
REMARK  surfFull: 403.641
REMARK  extraFull: 0.0
REMARK  deltaGcompsolvpol: -3073.04
REMARK  deltaGcompsolvnonpol: 403.641
REMARK  deltaGprotsolvpol: -3070.97
REMARK  deltaGprotsolvnonpol: 403.01
REMARK  deltaGligsolvpol: -16.1516
REMARK  deltaGligsolvnonpol: 6.66304
REMARK  deltaGvdw: -26.0307
REMARK  deltaGelec: 0.0
REMARK  deltaG: -6.1613474
REMARK  Cluster: 7
REMARK  ClusterRank: 2
ATOM   9521 C    LIG     1      -8.624   4.658 -57.850  1.00  0.00      LIG  
ATOM   9522 C1   LIG     1      -9.387   4.539 -56.566  1.00  0.00      LIG  
ATOM   9523 O    LIG     1      -9.920   5.502 -56.036  1.00  0.00      LIG  
ATOM   9524 N    LIG     1      -9.357   3.268 -56.042  1.00  0.00      LIG  
ATOM   9525 C2   LIG     1      -9.987   2.947 -54.772  1.00  0.00      LIG  
ATOM   9526 C3   LIG     1     -10.275   1.460 -54.837  1.00  0.00      LIG  
ATOM   9527 O1   LIG     1     -10.458   0.844 -55.878  1.00  0.00      LIG  
ATOM   9528 C4   LIG     1      -9.102   3.386 -53.579  1.00  0.00      LIG  
ATOM   9529 C5   LIG     1      -9.868   3.670 -52.274  1.00  0.00      LIG  
ATOM   9530 C6   LIG     1     -10.839   4.845 -52.399  1.00  0.00      LIG  
ATOM   9531 C7   LIG     1     -11.485   5.207 -51.069  1.00  0.00      LIG  
ATOM   9532 O2   LIG     1     -12.664   4.442 -50.881  1.00  0.00      LIG  
ATOM   9533 O3   LIG     1     -10.151   5.987 -52.891  1.00  0.00      LIG  
ATOM   9534 O4   LIG     1     -10.569   2.516 -51.822  1.00  0.00      LIG  
ATOM   9535 O5   LIG     1      -8.064   2.434 -53.321  1.00  0.00      LIG  
ATOM   9536 H    LIG     1      -9.168   5.330 -58.519  1.00  0.00      LIG  
ATOM   9537 H1   LIG     1      -8.517   3.686 -58.341  1.00  0.00      LIG  
ATOM   9538 H2   LIG     1      -7.633   5.068 -57.638  1.00  0.00      LIG  
ATOM   9539 H3   LIG     1      -8.865   2.535 -56.543  1.00  0.00      LIG  
ATOM   9540 H4   LIG     1     -10.945   3.470 -54.741  1.00  0.00      LIG  
ATOM   9541 H5   LIG     1     -10.554   0.997 -53.879  1.00  0.00      LIG  
ATOM   9542 H6   LIG     1      -8.582   4.307 -53.855  1.00  0.00      LIG  
ATOM   9543 H7   LIG     1      -9.134   3.900 -51.501  1.00  0.00      LIG  
ATOM   9544 H8   LIG     1     -11.619   4.581 -53.111  1.00  0.00      LIG  
ATOM   9545 H9   LIG     1     -11.761   6.265 -51.029  1.00  0.00      LIG  
ATOM   9546 H10  LIG     1     -10.804   5.009 -50.237  1.00  0.00      LIG  
ATOM   9547 H11  LIG     1     -12.414   3.517 -51.050  1.00  0.00      LIG  
ATOM   9548 H12  LIG     1     -10.830   6.670 -53.040  1.00  0.00      LIG  
ATOM   9549 H13  LIG     1      -9.910   1.802 -51.768  1.00  0.00      LIG  
ATOM   9550 H14  LIG     1      -7.380   2.896 -52.798  1.00  0.00      LIG  
TER
REMARK  Energy: 6.39468
REMARK  SimpleFitness: 6.39468
REMARK  FullFitness: -2633.101
REMARK  InterFull: -26.0307
REMARK  IntraFull: 62.3289
REMARK  solvFull: -3073.04
REMARK  surfFull: 403.641
REMARK  extraFull: 0.0
REMARK  deltaGcompsolvpol: -3073.04
REMARK  deltaGcompsolvnonpol: 403.641
REMARK  deltaGprotsolvpol: -3070.97
REMARK  deltaGprotsolvnonpol: 403.01
REMARK  deltaGligsolvpol: -16.1516
REMARK  deltaGligsolvnonpol: 6.66304
REMARK  deltaGvdw: -26.0307
REMARK  deltaGelec: 0.0
REMARK  deltaG: -6.1613474
REMARK  Cluster: 7
REMARK  ClusterRank: 3
ATOM   9521 C    LIG     1      -8.624   4.658 -57.850  1.00  0.00      LIG  
ATOM   9522 C1   LIG     1      -9.387   4.539 -56.566  1.00  0.00      LIG  
ATOM   9523 O    LIG     1      -9.920   5.502 -56.036  1.00  0.00      LIG  
ATOM   9524 N    LIG     1      -9.357   3.268 -56.042  1.00  0.00      LIG  
ATOM   9525 C2   LIG     1      -9.987   2.947 -54.772  1.00  0.00      LIG  
ATOM   9526 C3   LIG     1     -10.275   1.460 -54.837  1.00  0.00      LIG  
ATOM   9527 O1   LIG     1     -10.458   0.844 -55.878  1.00  0.00      LIG  
ATOM   9528 C4   LIG     1      -9.102   3.386 -53.579  1.00  0.00      LIG  
ATOM   9529 C5   LIG     1      -9.868   3.670 -52.274  1.00  0.00      LIG  
ATOM   9530 C6   LIG     1     -10.839   4.845 -52.399  1.00  0.00      LIG  
ATOM   9531 C7   LIG     1     -11.485   5.207 -51.069  1.00  0.00      LIG  
ATOM   9532 O2   LIG     1     -12.664   4.442 -50.881  1.00  0.00      LIG  
ATOM   9533 O3   LIG     1     -10.151   5.987 -52.891  1.00  0.00      LIG  
ATOM   9534 O4   LIG     1     -10.569   2.516 -51.822  1.00  0.00      LIG  
ATOM   9535 O5   LIG     1      -8.064   2.434 -53.321  1.00  0.00      LIG  
ATOM   9536 H    LIG     1      -9.168   5.330 -58.519  1.00  0.00      LIG  
ATOM   9537 H1   LIG     1      -8.517   3.686 -58.341  1.00  0.00      LIG  
ATOM   9538 H2   LIG     1      -7.633   5.068 -57.638  1.00  0.00      LIG  
ATOM   9539 H3   LIG     1      -8.865   2.535 -56.543  1.00  0.00      LIG  
ATOM   9540 H4   LIG     1     -10.945   3.470 -54.741  1.00  0.00      LIG  
ATOM   9541 H5   LIG     1     -10.554   0.997 -53.879  1.00  0.00      LIG  
ATOM   9542 H6   LIG     1      -8.582   4.307 -53.855  1.00  0.00      LIG  
ATOM   9543 H7   LIG     1      -9.134   3.900 -51.501  1.00  0.00      LIG  
ATOM   9544 H8   LIG     1     -11.619   4.581 -53.111  1.00  0.00      LIG  
ATOM   9545 H9   LIG     1     -11.761   6.265 -51.029  1.00  0.00      LIG  
ATOM   9546 H10  LIG     1     -10.804   5.009 -50.237  1.00  0.00      LIG  
ATOM   9547 H11  LIG     1     -12.414   3.517 -51.050  1.00  0.00      LIG  
ATOM   9548 H12  LIG     1     -10.830   6.670 -53.040  1.00  0.00      LIG  
ATOM   9549 H13  LIG     1      -9.910   1.802 -51.768  1.00  0.00      LIG  
ATOM   9550 H14  LIG     1      -7.380   2.896 -52.798  1.00  0.00      LIG  
TER
REMARK  Energy: 6.42786
REMARK  SimpleFitness: 6.42786
REMARK  FullFitness: -2633.0232
REMARK  InterFull: -26.0872
REMARK  IntraFull: 62.4551
REMARK  solvFull: -3073.03
REMARK  surfFull: 403.639
REMARK  extraFull: 0.0
REMARK  deltaGcompsolvpol: -3073.03
REMARK  deltaGcompsolvnonpol: 403.639
REMARK  deltaGprotsolvpol: -3070.97
REMARK  deltaGprotsolvnonpol: 403.01
REMARK  deltaGligsolvpol: -16.2064
REMARK  deltaGligsolvnonpol: 6.66577
REMARK  deltaGvdw: -26.0872
REMARK  deltaGelec: 0.0
REMARK  deltaG: -6.163172
REMARK  Cluster: 7
REMARK  ClusterRank: 4
ATOM   9521 C    LIG     1      -8.577   4.713 -57.807  1.00  0.00      LIG  
ATOM   9522 C1   LIG     1      -9.372   4.583 -56.544  1.00  0.00      LIG  
ATOM   9523 O    LIG     1      -9.923   5.540 -56.023  1.00  0.00      LIG  
ATOM   9524 N    LIG     1      -9.341   3.311 -56.024  1.00  0.00      LIG  
ATOM   9525 C2   LIG     1      -9.991   2.982 -54.765  1.00  0.00      LIG  
ATOM   9526 C3   LIG     1     -10.289   1.498 -54.847  1.00  0.00      LIG  
ATOM   9527 O1   LIG     1     -10.474   0.896 -55.896  1.00  0.00      LIG  
ATOM   9528 C4   LIG     1      -9.117   3.405 -53.558  1.00  0.00      LIG  
ATOM   9529 C5   LIG     1      -9.892   3.682 -52.258  1.00  0.00      LIG  
ATOM   9530 C6   LIG     1     -10.866   4.853 -52.386  1.00  0.00      LIG  
ATOM   9531 C7   LIG     1     -11.516   5.213 -51.057  1.00  0.00      LIG  
ATOM   9532 O2   LIG     1     -12.692   4.444 -50.873  1.00  0.00      LIG  
ATOM   9533 O3   LIG     1     -10.181   5.998 -52.874  1.00  0.00      LIG  
ATOM   9534 O4   LIG     1     -10.588   2.522 -51.813  1.00  0.00      LIG  
ATOM   9535 O5   LIG     1      -8.086   2.445 -53.298  1.00  0.00      LIG  
ATOM   9536 H    LIG     1      -9.085   5.418 -58.469  1.00  0.00      LIG  
ATOM   9537 H1   LIG     1      -8.491   3.750 -58.322  1.00  0.00      LIG  
ATOM   9538 H2   LIG     1      -7.578   5.085 -57.564  1.00  0.00      LIG  
ATOM   9539 H3   LIG     1      -8.832   2.584 -56.517  1.00  0.00      LIG  
ATOM   9540 H4   LIG     1     -10.946   3.511 -54.742  1.00  0.00      LIG  
ATOM   9541 H5   LIG     1     -10.576   1.027 -53.896  1.00  0.00      LIG  
ATOM   9542 H6   LIG     1      -8.590   4.326 -53.820  1.00  0.00      LIG  
ATOM   9543 H7   LIG     1      -9.164   3.913 -51.480  1.00  0.00      LIG  
ATOM   9544 H8   LIG     1     -11.644   4.586 -53.100  1.00  0.00      LIG  
ATOM   9545 H9   LIG     1     -11.799   6.270 -51.020  1.00  0.00      LIG  
ATOM   9546 H10  LIG     1     -10.836   5.020 -50.224  1.00  0.00      LIG  
ATOM   9547 H11  LIG     1     -12.434   3.519 -51.036  1.00  0.00      LIG  
ATOM   9548 H12  LIG     1     -10.861   6.681 -53.021  1.00  0.00      LIG  
ATOM   9549 H13  LIG     1      -9.924   1.811 -51.765  1.00  0.00      LIG  
ATOM   9550 H14  LIG     1      -7.405   2.900 -52.766  1.00  0.00      LIG  
TER
REMARK  Energy: 6.42786
REMARK  SimpleFitness: 6.42786
REMARK  FullFitness: -2633.0232
REMARK  InterFull: -26.0872
REMARK  IntraFull: 62.4551
REMARK  solvFull: -3073.03
REMARK  surfFull: 403.639
REMARK  extraFull: 0.0
REMARK  deltaGcompsolvpol: -3073.03
REMARK  deltaGcompsolvnonpol: 403.639
REMARK  deltaGprotsolvpol: -3070.97
REMARK  deltaGprotsolvnonpol: 403.01
REMARK  deltaGligsolvpol: -16.2064
REMARK  deltaGligsolvnonpol: 6.66577
REMARK  deltaGvdw: -26.0872
REMARK  deltaGelec: 0.0
REMARK  deltaG: -6.163172
REMARK  Cluster: 7
REMARK  ClusterRank: 5
ATOM   9521 C    LIG     1      -8.577   4.713 -57.807  1.00  0.00      LIG  
ATOM   9522 C1   LIG     1      -9.372   4.583 -56.544  1.00  0.00      LIG  
ATOM   9523 O    LIG     1      -9.923   5.540 -56.023  1.00  0.00      LIG  
ATOM   9524 N    LIG     1      -9.341   3.311 -56.024  1.00  0.00      LIG  
ATOM   9525 C2   LIG     1      -9.991   2.982 -54.765  1.00  0.00      LIG  
ATOM   9526 C3   LIG     1     -10.289   1.498 -54.847  1.00  0.00      LIG  
ATOM   9527 O1   LIG     1     -10.474   0.896 -55.896  1.00  0.00      LIG  
ATOM   9528 C4   LIG     1      -9.117   3.405 -53.558  1.00  0.00      LIG  
ATOM   9529 C5   LIG     1      -9.892   3.682 -52.258  1.00  0.00      LIG  
ATOM   9530 C6   LIG     1     -10.866   4.853 -52.386  1.00  0.00      LIG  
ATOM   9531 C7   LIG     1     -11.516   5.213 -51.057  1.00  0.00      LIG  
ATOM   9532 O2   LIG     1     -12.692   4.444 -50.873  1.00  0.00      LIG  
ATOM   9533 O3   LIG     1     -10.181   5.998 -52.874  1.00  0.00      LIG  
ATOM   9534 O4   LIG     1     -10.588   2.522 -51.813  1.00  0.00      LIG  
ATOM   9535 O5   LIG     1      -8.086   2.445 -53.298  1.00  0.00      LIG  
ATOM   9536 H    LIG     1      -9.085   5.418 -58.469  1.00  0.00      LIG  
ATOM   9537 H1   LIG     1      -8.491   3.750 -58.322  1.00  0.00      LIG  
ATOM   9538 H2   LIG     1      -7.578   5.085 -57.564  1.00  0.00      LIG  
ATOM   9539 H3   LIG     1      -8.832   2.584 -56.517  1.00  0.00      LIG  
ATOM   9540 H4   LIG     1     -10.946   3.511 -54.742  1.00  0.00      LIG  
ATOM   9541 H5   LIG     1     -10.576   1.027 -53.896  1.00  0.00      LIG  
ATOM   9542 H6   LIG     1      -8.590   4.326 -53.820  1.00  0.00      LIG  
ATOM   9543 H7   LIG     1      -9.164   3.913 -51.480  1.00  0.00      LIG  
ATOM   9544 H8   LIG     1     -11.644   4.586 -53.100  1.00  0.00      LIG  
ATOM   9545 H9   LIG     1     -11.799   6.270 -51.020  1.00  0.00      LIG  
ATOM   9546 H10  LIG     1     -10.836   5.020 -50.224  1.00  0.00      LIG  
ATOM   9547 H11  LIG     1     -12.434   3.519 -51.036  1.00  0.00      LIG  
ATOM   9548 H12  LIG     1     -10.861   6.681 -53.021  1.00  0.00      LIG  
ATOM   9549 H13  LIG     1      -9.924   1.811 -51.765  1.00  0.00      LIG  
ATOM   9550 H14  LIG     1      -7.405   2.900 -52.766  1.00  0.00      LIG  
TER
REMARK  Energy: 6.42786
REMARK  SimpleFitness: 6.42786
REMARK  FullFitness: -2633.0232
REMARK  InterFull: -26.0872
REMARK  IntraFull: 62.4551
REMARK  solvFull: -3073.03
REMARK  surfFull: 403.639
REMARK  extraFull: 0.0
REMARK  deltaGcompsolvpol: -3073.03
REMARK  deltaGcompsolvnonpol: 403.639
REMARK  deltaGprotsolvpol: -3070.97
REMARK  deltaGprotsolvnonpol: 403.01
REMARK  deltaGligsolvpol: -16.2064
REMARK  deltaGligsolvnonpol: 6.66577
REMARK  deltaGvdw: -26.0872
REMARK  deltaGelec: 0.0
REMARK  deltaG: -6.163172
REMARK  Cluster: 7
REMARK  ClusterRank: 6
ATOM   9521 C    LIG     1      -8.577   4.713 -57.807  1.00  0.00      LIG  
ATOM   9522 C1   LIG     1      -9.372   4.583 -56.544  1.00  0.00      LIG  
ATOM   9523 O    LIG     1      -9.923   5.540 -56.023  1.00  0.00      LIG  
ATOM   9524 N    LIG     1      -9.341   3.311 -56.024  1.00  0.00      LIG  
ATOM   9525 C2   LIG     1      -9.991   2.982 -54.765  1.00  0.00      LIG  
ATOM   9526 C3   LIG     1     -10.289   1.498 -54.847  1.00  0.00      LIG  
ATOM   9527 O1   LIG     1     -10.474   0.896 -55.896  1.00  0.00      LIG  
ATOM   9528 C4   LIG     1      -9.117   3.405 -53.558  1.00  0.00      LIG  
ATOM   9529 C5   LIG     1      -9.892   3.682 -52.258  1.00  0.00      LIG  
ATOM   9530 C6   LIG     1     -10.866   4.853 -52.386  1.00  0.00      LIG  
ATOM   9531 C7   LIG     1     -11.516   5.213 -51.057  1.00  0.00      LIG  
ATOM   9532 O2   LIG     1     -12.692   4.444 -50.873  1.00  0.00      LIG  
ATOM   9533 O3   LIG     1     -10.181   5.998 -52.874  1.00  0.00      LIG  
ATOM   9534 O4   LIG     1     -10.588   2.522 -51.813  1.00  0.00      LIG  
ATOM   9535 O5   LIG     1      -8.086   2.445 -53.298  1.00  0.00      LIG  
ATOM   9536 H    LIG     1      -9.085   5.418 -58.469  1.00  0.00      LIG  
ATOM   9537 H1   LIG     1      -8.491   3.750 -58.322  1.00  0.00      LIG  
ATOM   9538 H2   LIG     1      -7.578   5.085 -57.564  1.00  0.00      LIG  
ATOM   9539 H3   LIG     1      -8.832   2.584 -56.517  1.00  0.00      LIG  
ATOM   9540 H4   LIG     1     -10.946   3.511 -54.742  1.00  0.00      LIG  
ATOM   9541 H5   LIG     1     -10.576   1.027 -53.896  1.00  0.00      LIG  
ATOM   9542 H6   LIG     1      -8.590   4.326 -53.820  1.00  0.00      LIG  
ATOM   9543 H7   LIG     1      -9.164   3.913 -51.480  1.00  0.00      LIG  
ATOM   9544 H8   LIG     1     -11.644   4.586 -53.100  1.00  0.00      LIG  
ATOM   9545 H9   LIG     1     -11.799   6.270 -51.020  1.00  0.00      LIG  
ATOM   9546 H10  LIG     1     -10.836   5.020 -50.224  1.00  0.00      LIG  
ATOM   9547 H11  LIG     1     -12.434   3.519 -51.036  1.00  0.00      LIG  
ATOM   9548 H12  LIG     1     -10.861   6.681 -53.021  1.00  0.00      LIG  
ATOM   9549 H13  LIG     1      -9.924   1.811 -51.765  1.00  0.00      LIG  
ATOM   9550 H14  LIG     1      -7.405   2.900 -52.766  1.00  0.00      LIG  
TER
REMARK  Energy: 6.40795
REMARK  SimpleFitness: 6.40795
REMARK  FullFitness: -2632.9915
REMARK  InterFull: -26.0589
REMARK  IntraFull: 62.4644
REMARK  solvFull: -3073.04
REMARK  surfFull: 403.643
REMARK  extraFull: 0.0
REMARK  deltaGcompsolvpol: -3073.04
REMARK  deltaGcompsolvnonpol: 403.643
REMARK  deltaGprotsolvpol: -3070.97
REMARK  deltaGprotsolvnonpol: 403.01
REMARK  deltaGligsolvpol: -16.1722
REMARK  deltaGligsolvnonpol: 6.66104
REMARK  deltaGvdw: -26.0589
REMARK  deltaGelec: 0.0
REMARK  deltaG: -6.1623745
REMARK  Cluster: 7
REMARK  ClusterRank: 7
ATOM   9521 C    LIG     1      -8.756   4.617 -57.925  1.00  0.00      LIG  
ATOM   9522 C1   LIG     1      -9.462   4.510 -56.608  1.00  0.00      LIG  
ATOM   9523 O    LIG     1      -9.968   5.479 -56.063  1.00  0.00      LIG  
ATOM   9524 N    LIG     1      -9.422   3.241 -56.081  1.00  0.00      LIG  
ATOM   9525 C2   LIG     1     -10.019   2.924 -54.795  1.00  0.00      LIG  
ATOM   9526 C3   LIG     1     -10.292   1.433 -54.847  1.00  0.00      LIG  
ATOM   9527 O1   LIG     1     -10.481   0.809 -55.883  1.00  0.00      LIG  
ATOM   9528 C4   LIG     1      -9.114   3.380 -53.623  1.00  0.00      LIG  
ATOM   9529 C5   LIG     1      -9.856   3.659 -52.304  1.00  0.00      LIG  
ATOM   9530 C6   LIG     1     -10.835   4.829 -52.412  1.00  0.00      LIG  
ATOM   9531 C7   LIG     1     -11.468   5.180 -51.072  1.00  0.00      LIG  
ATOM   9532 O2   LIG     1     -12.666   4.442 -50.896  1.00  0.00      LIG  
ATOM   9533 O3   LIG     1     -10.159   5.979 -52.904  1.00  0.00      LIG  
ATOM   9534 O4   LIG     1     -10.547   2.502 -51.843  1.00  0.00      LIG  
ATOM   9535 O5   LIG     1      -8.058   2.443 -53.383  1.00  0.00      LIG  
ATOM   9536 H    LIG     1      -9.343   5.261 -58.585  1.00  0.00      LIG  
ATOM   9537 H1   LIG     1      -8.648   3.636 -58.400  1.00  0.00      LIG  
ATOM   9538 H2   LIG     1      -7.767   5.052 -57.764  1.00  0.00      LIG  
ATOM   9539 H3   LIG     1      -8.965   2.500 -56.603  1.00  0.00      LIG  
ATOM   9540 H4   LIG     1     -10.981   3.437 -54.747  1.00  0.00      LIG  
ATOM   9541 H5   LIG     1     -10.555   0.972 -53.884  1.00  0.00      LIG  
ATOM   9542 H6   LIG     1      -8.611   4.306 -53.914  1.00  0.00      LIG  
ATOM   9543 H7   LIG     1      -9.111   3.890 -51.543  1.00  0.00      LIG  
ATOM   9544 H8   LIG     1     -11.622   4.566 -53.117  1.00  0.00      LIG  
ATOM   9545 H9   LIG     1     -11.719   6.243 -51.009  1.00  0.00      LIG  
ATOM   9546 H10  LIG     1     -10.791   4.947 -50.248  1.00  0.00      LIG  
ATOM   9547 H11  LIG     1     -12.443   3.516 -51.099  1.00  0.00      LIG  
ATOM   9548 H12  LIG     1     -10.841   6.665 -53.022  1.00  0.00      LIG  
ATOM   9549 H13  LIG     1      -9.883   1.791 -51.798  1.00  0.00      LIG  
ATOM   9550 H14  LIG     1      -7.385   2.905 -52.847  1.00  0.00      LIG  
TER
REMARK  Energy: 3.89451
REMARK  SimpleFitness: 3.89451
REMARK  FullFitness: -2633.0393
REMARK  InterFull: -26.8738
REMARK  IntraFull: 61.9025
REMARK  solvFull: -3071.07
REMARK  surfFull: 403.002
REMARK  extraFull: 0.0
REMARK  deltaGcompsolvpol: -3071.07
REMARK  deltaGcompsolvnonpol: 403.002
REMARK  deltaGprotsolvpol: -3070.97
REMARK  deltaGprotsolvnonpol: 403.01
REMARK  deltaGligsolvpol: -16.4228
REMARK  deltaGligsolvnonpol: 6.77864
REMARK  deltaGvdw: -26.8738
REMARK  deltaGelec: 0.0
REMARK  deltaG: -6.175328
REMARK  Cluster: 8
REMARK  ClusterRank: 0
ATOM   9521 C    LIG     1     -29.462  18.900 -57.549  1.00  0.00      LIG  
ATOM   9522 C1   LIG     1     -30.261  18.530 -56.335  1.00  0.00      LIG  
ATOM   9523 O    LIG     1     -31.173  17.722 -56.385  1.00  0.00      LIG  
ATOM   9524 N    LIG     1     -29.806  19.150 -55.193  1.00  0.00      LIG  
ATOM   9525 C2   LIG     1     -30.354  18.878 -53.871  1.00  0.00      LIG  
ATOM   9526 C3   LIG     1     -29.322  19.347 -52.876  1.00  0.00      LIG  
ATOM   9527 O1   LIG     1     -28.431  20.145 -53.134  1.00  0.00      LIG  
ATOM   9528 C4   LIG     1     -31.723  19.519 -53.569  1.00  0.00      LIG  
ATOM   9529 C5   LIG     1     -32.000  20.847 -54.288  1.00  0.00      LIG  
ATOM   9530 C6   LIG     1     -33.303  21.485 -53.795  1.00  0.00      LIG  
ATOM   9531 C7   LIG     1     -33.456  22.934 -54.252  1.00  0.00      LIG  
ATOM   9532 O2   LIG     1     -34.551  23.544 -53.572  1.00  0.00      LIG  
ATOM   9533 O3   LIG     1     -34.416  20.743 -54.296  1.00  0.00      LIG  
ATOM   9534 O4   LIG     1     -30.926  21.745 -54.044  1.00  0.00      LIG  
ATOM   9535 O5   LIG     1     -32.738  18.573 -53.883  1.00  0.00      LIG  
ATOM   9536 H    LIG     1     -30.146  19.023 -58.393  1.00  0.00      LIG  
ATOM   9537 H1   LIG     1     -28.749  18.099 -57.763  1.00  0.00      LIG  
ATOM   9538 H2   LIG     1     -28.919  19.840 -57.399  1.00  0.00      LIG  
ATOM   9539 H3   LIG     1     -28.989  19.750 -55.259  1.00  0.00      LIG  
ATOM   9540 H4   LIG     1     -30.420  17.791 -53.768  1.00  0.00      LIG  
ATOM   9541 H5   LIG     1     -29.491  19.010 -51.842  1.00  0.00      LIG  
ATOM   9542 H6   LIG     1     -31.804  19.695 -52.491  1.00  0.00      LIG  
ATOM   9543 H7   LIG     1     -32.074  20.675 -55.366  1.00  0.00      LIG  
ATOM   9544 H8   LIG     1     -33.346  21.448 -52.702  1.00  0.00      LIG  
ATOM   9545 H9   LIG     1     -33.661  22.982 -55.325  1.00  0.00      LIG  
ATOM   9546 H10  LIG     1     -32.569  23.533 -54.038  1.00  0.00      LIG  
ATOM   9547 H11  LIG     1     -34.332  23.544 -52.623  1.00  0.00      LIG  
ATOM   9548 H12  LIG     1     -35.194  21.317 -54.183  1.00  0.00      LIG  
ATOM   9549 H13  LIG     1     -30.102  21.266 -54.243  1.00  0.00      LIG  
ATOM   9550 H14  LIG     1     -33.568  19.082 -53.962  1.00  0.00      LIG  
TER
REMARK  Energy: 3.97354
REMARK  SimpleFitness: 3.97354
REMARK  FullFitness: -2632.7825
REMARK  InterFull: -26.755
REMARK  IntraFull: 62.5255
REMARK  solvFull: -3071.55
REMARK  surfFull: 402.997
REMARK  extraFull: 0.0
REMARK  deltaGcompsolvpol: -3071.55
REMARK  deltaGcompsolvnonpol: 402.997
REMARK  deltaGprotsolvpol: -3070.97
REMARK  deltaGprotsolvnonpol: 403.01
REMARK  deltaGligsolvpol: -17.078
REMARK  deltaGligsolvnonpol: 6.7543
REMARK  deltaGvdw: -26.755
REMARK  deltaGelec: 0.0
REMARK  deltaG: -6.151537
REMARK  Cluster: 8
REMARK  ClusterRank: 1
ATOM   9521 C    LIG     1     -29.416  18.879 -57.536  1.00  0.00      LIG  
ATOM   9522 C1   LIG     1     -30.229  18.536 -56.323  1.00  0.00      LIG  
ATOM   9523 O    LIG     1     -31.164  17.756 -56.376  1.00  0.00      LIG  
ATOM   9524 N    LIG     1     -29.757  19.146 -55.182  1.00  0.00      LIG  
ATOM   9525 C2   LIG     1     -30.302  18.874 -53.859  1.00  0.00      LIG  
ATOM   9526 C3   LIG     1     -29.279  19.359 -52.861  1.00  0.00      LIG  
ATOM   9527 O1   LIG     1     -28.130  19.671 -53.146  1.00  0.00      LIG  
ATOM   9528 C4   LIG     1     -31.678  19.507 -53.563  1.00  0.00      LIG  
ATOM   9529 C5   LIG     1     -31.966  20.830 -54.288  1.00  0.00      LIG  
ATOM   9530 C6   LIG     1     -33.259  21.472 -53.774  1.00  0.00      LIG  
ATOM   9531 C7   LIG     1     -33.421  22.919 -54.235  1.00  0.00      LIG  
ATOM   9532 O2   LIG     1     -34.507  23.531 -53.542  1.00  0.00      LIG  
ATOM   9533 O3   LIG     1     -34.378  20.727 -54.253  1.00  0.00      LIG  
ATOM   9534 O4   LIG     1     -30.883  21.726 -54.075  1.00  0.00      LIG  
ATOM   9535 O5   LIG     1     -32.687  18.551 -53.871  1.00  0.00      LIG  
ATOM   9536 H    LIG     1     -30.091  19.003 -58.386  1.00  0.00      LIG  
ATOM   9537 H1   LIG     1     -28.714  18.065 -57.736  1.00  0.00      LIG  
ATOM   9538 H2   LIG     1     -28.860  19.811 -57.394  1.00  0.00      LIG  
ATOM   9539 H3   LIG     1     -28.899  19.686 -55.242  1.00  0.00      LIG  
ATOM   9540 H4   LIG     1     -30.366  17.789 -53.746  1.00  0.00      LIG  
ATOM   9541 H5   LIG     1     -29.580  19.254 -51.808  1.00  0.00      LIG  
ATOM   9542 H6   LIG     1     -31.764  19.688 -52.486  1.00  0.00      LIG  
ATOM   9543 H7   LIG     1     -32.062  20.651 -55.363  1.00  0.00      LIG  
ATOM   9544 H8   LIG     1     -33.284  21.439 -52.680  1.00  0.00      LIG  
ATOM   9545 H9   LIG     1     -33.642  22.963 -55.305  1.00  0.00      LIG  
ATOM   9546 H10  LIG     1     -32.531  23.521 -54.036  1.00  0.00      LIG  
ATOM   9547 H11  LIG     1     -34.282  23.526 -52.595  1.00  0.00      LIG  
ATOM   9548 H12  LIG     1     -35.156  21.299 -54.127  1.00  0.00      LIG  
ATOM   9549 H13  LIG     1     -30.089  21.292 -54.434  1.00  0.00      LIG  
ATOM   9550 H14  LIG     1     -33.524  19.049 -53.925  1.00  0.00      LIG  
TER
REMARK  Energy: 5.3267
REMARK  SimpleFitness: 5.3267
REMARK  FullFitness: -2630.162
REMARK  InterFull: -23.1964
REMARK  IntraFull: 64.4042
REMARK  solvFull: -3074.73
REMARK  surfFull: 403.36
REMARK  extraFull: 0.0
REMARK  deltaGcompsolvpol: -3074.73
REMARK  deltaGcompsolvnonpol: 403.36
REMARK  deltaGprotsolvpol: -3070.97
REMARK  deltaGprotsolvnonpol: 403.01
REMARK  deltaGligsolvpol: -19.4714
REMARK  deltaGligsolvnonpol: 6.76744
REMARK  deltaGvdw: -23.1964
REMARK  deltaGelec: 0.0
REMARK  deltaG: -5.8299346
REMARK  Cluster: 8
REMARK  ClusterRank: 2
ATOM   9521 C    LIG     1     -29.088  18.587 -56.809  1.00  0.00      LIG  
ATOM   9522 C1   LIG     1     -30.298  18.404 -55.944  1.00  0.00      LIG  
ATOM   9523 O    LIG     1     -31.314  17.872 -56.362  1.00  0.00      LIG  
ATOM   9524 N    LIG     1     -30.136  18.953 -54.692  1.00  0.00      LIG  
ATOM   9525 C2   LIG     1     -31.155  18.857 -53.653  1.00  0.00      LIG  
ATOM   9526 C3   LIG     1     -30.460  19.186 -52.355  1.00  0.00      LIG  
ATOM   9527 O1   LIG     1     -31.075  19.439 -51.329  1.00  0.00      LIG  
ATOM   9528 C4   LIG     1     -32.405  19.743 -53.856  1.00  0.00      LIG  
ATOM   9529 C5   LIG     1     -32.191  21.042 -54.642  1.00  0.00      LIG  
ATOM   9530 C6   LIG     1     -33.419  21.954 -54.521  1.00  0.00      LIG  
ATOM   9531 C7   LIG     1     -33.154  23.372 -55.020  1.00  0.00      LIG  
ATOM   9532 O2   LIG     1     -32.534  23.351 -56.302  1.00  0.00      LIG  
ATOM   9533 O3   LIG     1     -34.516  21.410 -55.257  1.00  0.00      LIG  
ATOM   9534 O4   LIG     1     -31.061  21.738 -54.129  1.00  0.00      LIG  
ATOM   9535 O5   LIG     1     -33.423  18.957 -54.469  1.00  0.00      LIG  
ATOM   9536 H    LIG     1     -29.204  19.501 -57.397  1.00  0.00      LIG  
ATOM   9537 H1   LIG     1     -29.001  17.725 -57.475  1.00  0.00      LIG  
ATOM   9538 H2   LIG     1     -28.178  18.653 -56.204  1.00  0.00      LIG  
ATOM   9539 H3   LIG     1     -29.221  19.319 -54.452  1.00  0.00      LIG  
ATOM   9540 H4   LIG     1     -31.437  17.800 -53.596  1.00  0.00      LIG  
ATOM   9541 H5   LIG     1     -29.412  18.853 -52.277  1.00  0.00      LIG  
ATOM   9542 H6   LIG     1     -32.805  20.030 -52.884  1.00  0.00      LIG  
ATOM   9543 H7   LIG     1     -32.012  20.810 -55.697  1.00  0.00      LIG  
ATOM   9544 H8   LIG     1     -33.729  22.015 -53.474  1.00  0.00      LIG  
ATOM   9545 H9   LIG     1     -32.492  23.908 -54.336  1.00  0.00      LIG  
ATOM   9546 H10  LIG     1     -34.088  23.933 -55.111  1.00  0.00      LIG  
ATOM   9547 H11  LIG     1     -31.696  22.871 -56.192  1.00  0.00      LIG  
ATOM   9548 H12  LIG     1     -34.360  21.640 -56.190  1.00  0.00      LIG  
ATOM   9549 H13  LIG     1     -30.303  21.134 -54.215  1.00  0.00      LIG  
ATOM   9550 H14  LIG     1     -34.131  19.578 -54.722  1.00  0.00      LIG  
TER
REMARK  Energy: 5.3582
REMARK  SimpleFitness: 5.3582
REMARK  FullFitness: -2630.1538
REMARK  InterFull: -23.268
REMARK  IntraFull: 64.442
REMARK  solvFull: -3074.69
REMARK  surfFull: 403.362
REMARK  extraFull: 0.0
REMARK  deltaGcompsolvpol: -3074.69
REMARK  deltaGcompsolvnonpol: 403.362
REMARK  deltaGprotsolvpol: -3070.97
REMARK  deltaGprotsolvnonpol: 403.01
REMARK  deltaGligsolvpol: -19.4409
REMARK  deltaGligsolvnonpol: 6.76607
REMARK  deltaGvdw: -23.268
REMARK  deltaGelec: 0.0
REMARK  deltaG: -5.835804
REMARK  Cluster: 8
REMARK  ClusterRank: 3
ATOM   9521 C    LIG     1     -29.110  18.532 -56.781  1.00  0.00      LIG  
ATOM   9522 C1   LIG     1     -30.333  18.390 -55.926  1.00  0.00      LIG  
ATOM   9523 O    LIG     1     -31.362  17.892 -56.351  1.00  0.00      LIG  
ATOM   9524 N    LIG     1     -30.163  18.934 -54.673  1.00  0.00      LIG  
ATOM   9525 C2   LIG     1     -31.190  18.867 -53.640  1.00  0.00      LIG  
ATOM   9526 C3   LIG     1     -30.493  19.191 -52.341  1.00  0.00      LIG  
ATOM   9527 O1   LIG     1     -31.106  19.462 -51.318  1.00  0.00      LIG  
ATOM   9528 C4   LIG     1     -32.422  19.775 -53.855  1.00  0.00      LIG  
ATOM   9529 C5   LIG     1     -32.184  21.061 -54.656  1.00  0.00      LIG  
ATOM   9530 C6   LIG     1     -33.391  22.001 -54.542  1.00  0.00      LIG  
ATOM   9531 C7   LIG     1     -33.100  23.402 -55.073  1.00  0.00      LIG  
ATOM   9532 O2   LIG     1     -32.492  23.341 -56.359  1.00  0.00      LIG  
ATOM   9533 O3   LIG     1     -34.506  21.467 -55.257  1.00  0.00      LIG  
ATOM   9534 O4   LIG     1     -31.036  21.739 -54.156  1.00  0.00      LIG  
ATOM   9535 O5   LIG     1     -33.454  19.000 -54.460  1.00  0.00      LIG  
ATOM   9536 H    LIG     1     -29.192  19.447 -57.374  1.00  0.00      LIG  
ATOM   9537 H1   LIG     1     -29.045  17.665 -57.443  1.00  0.00      LIG  
ATOM   9538 H2   LIG     1     -28.203  18.571 -56.170  1.00  0.00      LIG  
ATOM   9539 H3   LIG     1     -29.236  19.262 -54.423  1.00  0.00      LIG  
ATOM   9540 H4   LIG     1     -31.492  17.816 -53.576  1.00  0.00      LIG  
ATOM   9541 H5   LIG     1     -29.452  18.839 -52.257  1.00  0.00      LIG  
ATOM   9542 H6   LIG     1     -32.819  20.081 -52.887  1.00  0.00      LIG  
ATOM   9543 H7   LIG     1     -32.014  20.813 -55.708  1.00  0.00      LIG  
ATOM   9544 H8   LIG     1     -33.689  22.090 -53.494  1.00  0.00      LIG  
ATOM   9545 H9   LIG     1     -32.421  23.938 -54.406  1.00  0.00      LIG  
ATOM   9546 H10  LIG     1     -34.023  23.981 -55.169  1.00  0.00      LIG  
ATOM   9547 H11  LIG     1     -31.674  22.825 -56.250  1.00  0.00      LIG  
ATOM   9548 H12  LIG     1     -34.347  21.666 -56.197  1.00  0.00      LIG  
ATOM   9549 H13  LIG     1     -30.292  21.119 -54.240  1.00  0.00      LIG  
ATOM   9550 H14  LIG     1     -34.156  19.629 -54.710  1.00  0.00      LIG  
TER
REMARK  Energy: 5.51426
REMARK  SimpleFitness: 5.51426
REMARK  FullFitness: -2629.9548
REMARK  InterFull: -23.1477
REMARK  IntraFull: 64.4108
REMARK  solvFull: -3074.61
REMARK  surfFull: 403.392
REMARK  extraFull: 0.0
REMARK  deltaGcompsolvpol: -3074.61
REMARK  deltaGcompsolvnonpol: 403.392
REMARK  deltaGprotsolvpol: -3070.97
REMARK  deltaGprotsolvnonpol: 403.01
REMARK  deltaGligsolvpol: -19.3095
REMARK  deltaGligsolvnonpol: 6.77328
REMARK  deltaGvdw: -23.1477
REMARK  deltaGelec: 0.0
REMARK  deltaG: -5.8254232
REMARK  Cluster: 8
REMARK  ClusterRank: 4
ATOM   9521 C    LIG     1     -29.168  18.414 -56.712  1.00  0.00      LIG  
ATOM   9522 C1   LIG     1     -30.413  18.351 -55.879  1.00  0.00      LIG  
ATOM   9523 O    LIG     1     -31.466  17.925 -56.327  1.00  0.00      LIG  
ATOM   9524 N    LIG     1     -30.229  18.883 -54.623  1.00  0.00      LIG  
ATOM   9525 C2   LIG     1     -31.274  18.889 -53.605  1.00  0.00      LIG  
ATOM   9526 C3   LIG     1     -30.580  19.213 -52.304  1.00  0.00      LIG  
ATOM   9527 O1   LIG     1     -31.192  19.540 -51.297  1.00  0.00      LIG  
ATOM   9528 C4   LIG     1     -32.461  19.846 -53.861  1.00  0.00      LIG  
ATOM   9529 C5   LIG     1     -32.155  21.085 -54.715  1.00  0.00      LIG  
ATOM   9530 C6   LIG     1     -33.316  22.085 -54.667  1.00  0.00      LIG  
ATOM   9531 C7   LIG     1     -32.950  23.435 -55.278  1.00  0.00      LIG  
ATOM   9532 O2   LIG     1     -32.349  23.268 -56.559  1.00  0.00      LIG  
ATOM   9533 O3   LIG     1     -34.452  21.567 -55.359  1.00  0.00      LIG  
ATOM   9534 O4   LIG     1     -30.984  21.733 -54.228  1.00  0.00      LIG  
ATOM   9535 O5   LIG     1     -33.524  19.096 -54.445  1.00  0.00      LIG  
ATOM   9536 H    LIG     1     -29.164  19.344 -57.285  1.00  0.00      LIG  
ATOM   9537 H1   LIG     1     -29.161  17.558 -57.392  1.00  0.00      LIG  
ATOM   9538 H2   LIG     1     -28.272  18.365 -56.084  1.00  0.00      LIG  
ATOM   9539 H3   LIG     1     -29.285  19.136 -54.353  1.00  0.00      LIG  
ATOM   9540 H4   LIG     1     -31.624  17.854 -53.520  1.00  0.00      LIG  
ATOM   9541 H5   LIG     1     -29.560  18.811 -52.195  1.00  0.00      LIG  
ATOM   9542 H6   LIG     1     -32.851  20.210 -52.909  1.00  0.00      LIG  
ATOM   9543 H7   LIG     1     -31.984  20.782 -55.752  1.00  0.00      LIG  
ATOM   9544 H8   LIG     1     -33.615  22.252 -53.628  1.00  0.00      LIG  
ATOM   9545 H9   LIG     1     -32.242  23.971 -54.643  1.00  0.00      LIG  
ATOM   9546 H10  LIG     1     -33.840  24.058 -55.409  1.00  0.00      LIG  
ATOM   9547 H11  LIG     1     -31.551  22.730 -56.418  1.00  0.00      LIG  
ATOM   9548 H12  LIG     1     -34.285  21.713 -56.307  1.00  0.00      LIG  
ATOM   9549 H13  LIG     1     -30.268  21.076 -54.271  1.00  0.00      LIG  
ATOM   9550 H14  LIG     1     -34.189  19.747 -54.734  1.00  0.00      LIG  
TER
REMARK  Energy: 5.66334
REMARK  SimpleFitness: 5.66334
REMARK  FullFitness: -2629.2847
REMARK  InterFull: -25.314
REMARK  IntraFull: 63.9813
REMARK  solvFull: -3071.03
REMARK  surfFull: 403.078
REMARK  extraFull: 0.0
REMARK  deltaGcompsolvpol: -3071.03
REMARK  deltaGcompsolvnonpol: 403.078
REMARK  deltaGprotsolvpol: -3070.97
REMARK  deltaGprotsolvnonpol: 403.01
REMARK  deltaGligsolvpol: -17.3663
REMARK  deltaGligsolvnonpol: 6.72657
REMARK  deltaGvdw: -25.314
REMARK  deltaGelec: 0.0
REMARK  deltaG: -5.955464
REMARK  Cluster: 8
REMARK  ClusterRank: 5
ATOM   9521 C    LIG     1     -28.937  19.255 -56.981  1.00  0.00      LIG  
ATOM   9522 C1   LIG     1     -30.107  18.694 -56.231  1.00  0.00      LIG  
ATOM   9523 O    LIG     1     -30.812  17.811 -56.696  1.00  0.00      LIG  
ATOM   9524 N    LIG     1     -30.222  19.215 -54.964  1.00  0.00      LIG  
ATOM   9525 C2   LIG     1     -31.261  18.783 -54.045  1.00  0.00      LIG  
ATOM   9526 C3   LIG     1     -30.704  18.864 -52.645  1.00  0.00      LIG  
ATOM   9527 O1   LIG     1     -29.823  19.638 -52.296  1.00  0.00      LIG  
ATOM   9528 C4   LIG     1     -32.580  19.569 -54.157  1.00  0.00      LIG  
ATOM   9529 C5   LIG     1     -32.472  21.078 -54.442  1.00  0.00      LIG  
ATOM   9530 C6   LIG     1     -33.760  21.805 -54.041  1.00  0.00      LIG  
ATOM   9531 C7   LIG     1     -33.660  23.306 -54.299  1.00  0.00      LIG  
ATOM   9532 O2   LIG     1     -34.720  23.983 -53.629  1.00  0.00      LIG  
ATOM   9533 O3   LIG     1     -34.874  21.296 -54.774  1.00  0.00      LIG  
ATOM   9534 O4   LIG     1     -31.401  21.667 -53.710  1.00  0.00      LIG  
ATOM   9535 O5   LIG     1     -33.399  18.952 -55.146  1.00  0.00      LIG  
ATOM   9536 H    LIG     1     -29.208  19.348 -58.036  1.00  0.00      LIG  
ATOM   9537 H1   LIG     1     -28.088  18.574 -56.875  1.00  0.00      LIG  
ATOM   9538 H2   LIG     1     -28.660  20.244 -56.603  1.00  0.00      LIG  
ATOM   9539 H3   LIG     1     -29.596  19.959 -54.672  1.00  0.00      LIG  
ATOM   9540 H4   LIG     1     -31.448  17.720 -54.235  1.00  0.00      LIG  
ATOM   9541 H5   LIG     1     -31.260  18.283 -51.893  1.00  0.00      LIG  
ATOM   9542 H6   LIG     1     -33.118  19.452 -53.219  1.00  0.00      LIG  
ATOM   9543 H7   LIG     1     -32.290  21.239 -55.510  1.00  0.00      LIG  
ATOM   9544 H8   LIG     1     -33.961  21.636 -52.979  1.00  0.00      LIG  
ATOM   9545 H9   LIG     1     -33.749  23.525 -55.368  1.00  0.00      LIG  
ATOM   9546 H10  LIG     1     -32.721  23.727 -53.937  1.00  0.00      LIG  
ATOM   9547 H11  LIG     1     -34.581  23.855 -52.673  1.00  0.00      LIG  
ATOM   9548 H12  LIG     1     -35.592  21.944 -54.658  1.00  0.00      LIG  
ATOM   9549 H13  LIG     1     -31.402  21.272 -52.820  1.00  0.00      LIG  
ATOM   9550 H14  LIG     1     -34.166  19.543 -55.265  1.00  0.00      LIG  
TER
REMARK  Energy: 7.43287
REMARK  SimpleFitness: 7.43287
REMARK  FullFitness: -2627.1487
REMARK  InterFull: -24.8553
REMARK  IntraFull: 66.3466
REMARK  solvFull: -3072.16
REMARK  surfFull: 403.52
REMARK  extraFull: 0.0
REMARK  deltaGcompsolvpol: -3072.16
REMARK  deltaGcompsolvnonpol: 403.52
REMARK  deltaGprotsolvpol: -3070.97
REMARK  deltaGprotsolvnonpol: 403.01
REMARK  deltaGligsolvpol: -19.6111
REMARK  deltaGligsolvnonpol: 6.81886
REMARK  deltaGvdw: -24.8553
REMARK  deltaGelec: 0.0
REMARK  deltaG: -5.8107567
REMARK  Cluster: 8
REMARK  ClusterRank: 6
ATOM   9521 C    LIG     1     -29.240  18.693 -57.103  1.00  0.00      LIG  
ATOM   9522 C1   LIG     1     -30.469  18.346 -56.318  1.00  0.00      LIG  
ATOM   9523 O    LIG     1     -31.390  17.709 -56.807  1.00  0.00      LIG  
ATOM   9524 N    LIG     1     -30.448  18.855 -55.040  1.00  0.00      LIG  
ATOM   9525 C2   LIG     1     -31.562  18.680 -54.122  1.00  0.00      LIG  
ATOM   9526 C3   LIG     1     -30.981  18.484 -52.746  1.00  0.00      LIG  
ATOM   9527 O1   LIG     1     -31.670  18.159 -51.790  1.00  0.00      LIG  
ATOM   9528 C4   LIG     1     -32.573  19.842 -54.144  1.00  0.00      LIG  
ATOM   9529 C5   LIG     1     -31.944  21.229 -54.363  1.00  0.00      LIG  
ATOM   9530 C6   LIG     1     -32.927  22.407 -54.277  1.00  0.00      LIG  
ATOM   9531 C7   LIG     1     -33.641  22.650 -55.601  1.00  0.00      LIG  
ATOM   9532 O2   LIG     1     -34.251  23.935 -55.590  1.00  0.00      LIG  
ATOM   9533 O3   LIG     1     -33.904  22.183 -53.258  1.00  0.00      LIG  
ATOM   9534 O4   LIG     1     -30.936  21.431 -53.376  1.00  0.00      LIG  
ATOM   9535 O5   LIG     1     -33.557  19.567 -55.139  1.00  0.00      LIG  
ATOM   9536 H    LIG     1     -29.482  19.492 -57.807  1.00  0.00      LIG  
ATOM   9537 H1   LIG     1     -28.910  17.805 -57.649  1.00  0.00      LIG  
ATOM   9538 H2   LIG     1     -28.426  19.022 -56.449  1.00  0.00      LIG  
ATOM   9539 H3   LIG     1     -29.663  19.434 -54.759  1.00  0.00      LIG  
ATOM   9540 H4   LIG     1     -32.069  17.746 -54.376  1.00  0.00      LIG  
ATOM   9541 H5   LIG     1     -29.990  18.935 -52.570  1.00  0.00      LIG  
ATOM   9542 H6   LIG     1     -33.101  19.844 -53.192  1.00  0.00      LIG  
ATOM   9543 H7   LIG     1     -31.453  21.275 -55.339  1.00  0.00      LIG  
ATOM   9544 H8   LIG     1     -32.396  23.321 -53.993  1.00  0.00      LIG  
ATOM   9545 H9   LIG     1     -34.432  21.915 -55.774  1.00  0.00      LIG  
ATOM   9546 H10  LIG     1     -32.933  22.621 -56.434  1.00  0.00      LIG  
ATOM   9547 H11  LIG     1     -34.742  23.995 -54.752  1.00  0.00      LIG  
ATOM   9548 H12  LIG     1     -33.431  22.116 -52.411  1.00  0.00      LIG  
ATOM   9549 H13  LIG     1     -31.368  21.351 -52.508  1.00  0.00      LIG  
ATOM   9550 H14  LIG     1     -34.247  20.248 -55.046  1.00  0.00      LIG  
TER
REMARK  Energy: 13.2509
REMARK  SimpleFitness: 13.2509
REMARK  FullFitness: -2618.7612
REMARK  InterFull: -22.9014
REMARK  IntraFull: 71.7451
REMARK  solvFull: -3070.92
REMARK  surfFull: 403.315
REMARK  extraFull: 0.0
REMARK  deltaGcompsolvpol: -3070.92
REMARK  deltaGcompsolvnonpol: 403.315
REMARK  deltaGprotsolvpol: -3070.97
REMARK  deltaGprotsolvnonpol: 403.01
REMARK  deltaGligsolvpol: -17.8112
REMARK  deltaGligsolvnonpol: 6.795
REMARK  deltaGvdw: -22.9014
REMARK  deltaGelec: 0.0
REMARK  deltaG: -5.6773186
REMARK  Cluster: 8
REMARK  ClusterRank: 7
ATOM   9521 C    LIG     1     -29.602  18.765 -56.265  1.00  0.00      LIG  
ATOM   9522 C1   LIG     1     -30.670  18.760 -55.214  1.00  0.00      LIG  
ATOM   9523 O    LIG     1     -31.596  17.969 -55.228  1.00  0.00      LIG  
ATOM   9524 N    LIG     1     -30.547  19.805 -54.331  1.00  0.00      LIG  
ATOM   9525 C2   LIG     1     -31.424  19.976 -53.184  1.00  0.00      LIG  
ATOM   9526 C3   LIG     1     -30.443  20.021 -52.032  1.00  0.00      LIG  
ATOM   9527 O1   LIG     1     -29.308  20.475 -52.111  1.00  0.00      LIG  
ATOM   9528 C4   LIG     1     -32.291  21.259 -53.255  1.00  0.00      LIG  
ATOM   9529 C5   LIG     1     -33.445  21.228 -54.283  1.00  0.00      LIG  
ATOM   9530 C6   LIG     1     -33.163  21.895 -55.640  1.00  0.00      LIG  
ATOM   9531 C7   LIG     1     -33.660  23.337 -55.664  1.00  0.00      LIG  
ATOM   9532 O2   LIG     1     -33.131  24.089 -54.578  1.00  0.00      LIG  
ATOM   9533 O3   LIG     1     -31.776  21.890 -55.967  1.00  0.00      LIG  
ATOM   9534 O4   LIG     1     -33.859  19.882 -54.508  1.00  0.00      LIG  
ATOM   9535 O5   LIG     1     -32.911  21.483 -51.986  1.00  0.00      LIG  
ATOM   9536 H    LIG     1     -29.468  17.745 -56.633  1.00  0.00      LIG  
ATOM   9537 H1   LIG     1     -28.653  19.116 -55.848  1.00  0.00      LIG  
ATOM   9538 H2   LIG     1     -29.909  19.420 -57.085  1.00  0.00      LIG  
ATOM   9539 H3   LIG     1     -29.715  20.385 -54.382  1.00  0.00      LIG  
ATOM   9540 H4   LIG     1     -32.036  19.082 -53.029  1.00  0.00      LIG  
ATOM   9541 H5   LIG     1     -30.882  19.804 -51.047  1.00  0.00      LIG  
ATOM   9542 H6   LIG     1     -31.660  22.135 -53.429  1.00  0.00      LIG  
ATOM   9543 H7   LIG     1     -34.334  21.720 -53.874  1.00  0.00      LIG  
ATOM   9544 H8   LIG     1     -33.670  21.354 -56.444  1.00  0.00      LIG  
ATOM   9545 H9   LIG     1     -34.751  23.361 -55.588  1.00  0.00      LIG  
ATOM   9546 H10  LIG     1     -33.359  23.837 -56.589  1.00  0.00      LIG  
ATOM   9547 H11  LIG     1     -32.173  23.921 -54.576  1.00  0.00      LIG  
ATOM   9548 H12  LIG     1     -31.461  20.982 -55.805  1.00  0.00      LIG  
ATOM   9549 H13  LIG     1     -34.078  19.504 -53.639  1.00  0.00      LIG  
ATOM   9550 H14  LIG     1     -33.496  20.724 -51.803  1.00  0.00      LIG  
TER
REMARK  Energy: 2.74645
REMARK  SimpleFitness: 2.74645
REMARK  FullFitness: -2633.0325
REMARK  InterFull: -26.1684
REMARK  IntraFull: 59.9579
REMARK  solvFull: -3070.1
REMARK  surfFull: 403.278
REMARK  extraFull: 0.0
REMARK  deltaGcompsolvpol: -3070.1
REMARK  deltaGcompsolvnonpol: 403.278
REMARK  deltaGprotsolvpol: -3070.97
REMARK  deltaGprotsolvnonpol: 403.01
REMARK  deltaGligsolvpol: -15.7443
REMARK  deltaGligsolvnonpol: 6.79944
REMARK  deltaGvdw: -26.1684
REMARK  deltaGelec: 0.0
REMARK  deltaG: -6.0666165
REMARK  Cluster: 9
REMARK  ClusterRank: 0
ATOM   9521 C    LIG     1     -31.818  18.842 -53.601  1.00  0.00      LIG  
ATOM   9522 C1   LIG     1     -30.849  19.967 -53.403  1.00  0.00      LIG  
ATOM   9523 O    LIG     1     -31.210  21.117 -53.208  1.00  0.00      LIG  
ATOM   9524 N    LIG     1     -29.546  19.533 -53.374  1.00  0.00      LIG  
ATOM   9525 C2   LIG     1     -28.432  20.445 -53.162  1.00  0.00      LIG  
ATOM   9526 C3   LIG     1     -27.424  19.685 -52.348  1.00  0.00      LIG  
ATOM   9527 O1   LIG     1     -26.288  20.097 -52.174  1.00  0.00      LIG  
ATOM   9528 C4   LIG     1     -27.796  20.986 -54.457  1.00  0.00      LIG  
ATOM   9529 C5   LIG     1     -27.789  19.992 -55.626  1.00  0.00      LIG  
ATOM   9530 C6   LIG     1     -27.100  20.583 -56.870  1.00  0.00      LIG  
ATOM   9531 C7   LIG     1     -25.605  20.886 -56.715  1.00  0.00      LIG  
ATOM   9532 O2   LIG     1     -24.840  19.730 -56.383  1.00  0.00      LIG  
ATOM   9533 O3   LIG     1     -27.283  19.706 -57.983  1.00  0.00      LIG  
ATOM   9534 O4   LIG     1     -27.171  18.768 -55.230  1.00  0.00      LIG  
ATOM   9535 O5   LIG     1     -28.487  22.167 -54.857  1.00  0.00      LIG  
ATOM   9536 H    LIG     1     -31.388  18.065 -54.241  1.00  0.00      LIG  
ATOM   9537 H1   LIG     1     -32.718  19.232 -54.082  1.00  0.00      LIG  
ATOM   9538 H2   LIG     1     -32.074  18.414 -52.628  1.00  0.00      LIG  
ATOM   9539 H3   LIG     1     -29.353  18.552 -53.558  1.00  0.00      LIG  
ATOM   9540 H4   LIG     1     -28.789  21.268 -52.534  1.00  0.00      LIG  
ATOM   9541 H5   LIG     1     -27.827  18.906 -51.684  1.00  0.00      LIG  
ATOM   9542 H6   LIG     1     -26.770  21.299 -54.248  1.00  0.00      LIG  
ATOM   9543 H7   LIG     1     -28.819  19.747 -55.905  1.00  0.00      LIG  
ATOM   9544 H8   LIG     1     -27.602  21.516 -57.138  1.00  0.00      LIG  
ATOM   9545 H9   LIG     1     -25.437  21.637 -55.939  1.00  0.00      LIG  
ATOM   9546 H10  LIG     1     -25.204  21.274 -57.655  1.00  0.00      LIG  
ATOM   9547 H11  LIG     1     -25.005  19.089 -57.097  1.00  0.00      LIG  
ATOM   9548 H12  LIG     1     -28.213  19.422 -57.965  1.00  0.00      LIG  
ATOM   9549 H13  LIG     1     -26.209  18.923 -55.270  1.00  0.00      LIG  
ATOM   9550 H14  LIG     1     -28.454  22.778 -54.100  1.00  0.00      LIG  
TER
REMARK  Energy: 2.88019
REMARK  SimpleFitness: 2.88019
REMARK  FullFitness: -2632.9407
REMARK  InterFull: -26.2727
REMARK  IntraFull: 59.987
REMARK  solvFull: -3069.86
REMARK  surfFull: 403.205
REMARK  extraFull: 0.0
REMARK  deltaGcompsolvpol: -3069.86
REMARK  deltaGcompsolvnonpol: 403.205
REMARK  deltaGprotsolvpol: -3070.97
REMARK  deltaGprotsolvnonpol: 403.01
REMARK  deltaGligsolvpol: -15.6393
REMARK  deltaGligsolvnonpol: 6.7887
REMARK  deltaGvdw: -26.2727
REMARK  deltaGelec: 0.0
REMARK  deltaG: -6.074115
REMARK  Cluster: 9
REMARK  ClusterRank: 1
ATOM   9521 C    LIG     1     -31.814  18.931 -53.841  1.00  0.00      LIG  
ATOM   9522 C1   LIG     1     -30.845  20.021 -53.500  1.00  0.00      LIG  
ATOM   9523 O    LIG     1     -31.193  21.178 -53.323  1.00  0.00      LIG  
ATOM   9524 N    LIG     1     -29.545  19.576 -53.485  1.00  0.00      LIG  
ATOM   9525 C2   LIG     1     -28.423  20.463 -53.217  1.00  0.00      LIG  
ATOM   9526 C3   LIG     1     -27.476  19.680 -52.352  1.00  0.00      LIG  
ATOM   9527 O1   LIG     1     -26.341  20.068 -52.118  1.00  0.00      LIG  
ATOM   9528 C4   LIG     1     -27.711  20.986 -54.479  1.00  0.00      LIG  
ATOM   9529 C5   LIG     1     -27.689  19.997 -55.653  1.00  0.00      LIG  
ATOM   9530 C6   LIG     1     -26.903  20.559 -56.852  1.00  0.00      LIG  
ATOM   9531 C7   LIG     1     -25.399  20.752 -56.622  1.00  0.00      LIG  
ATOM   9532 O2   LIG     1     -24.728  19.536 -56.301  1.00  0.00      LIG  
ATOM   9533 O3   LIG     1     -27.093  19.715 -57.990  1.00  0.00      LIG  
ATOM   9534 O4   LIG     1     -27.156  18.742 -55.234  1.00  0.00      LIG  
ATOM   9535 O5   LIG     1     -28.341  22.193 -54.902  1.00  0.00      LIG  
ATOM   9536 H    LIG     1     -31.860  18.814 -54.927  1.00  0.00      LIG  
ATOM   9537 H1   LIG     1     -32.800  19.204 -53.460  1.00  0.00      LIG  
ATOM   9538 H2   LIG     1     -31.512  17.985 -53.381  1.00  0.00      LIG  
ATOM   9539 H3   LIG     1     -29.360  18.601 -53.703  1.00  0.00      LIG  
ATOM   9540 H4   LIG     1     -28.790  21.296 -52.607  1.00  0.00      LIG  
ATOM   9541 H5   LIG     1     -27.931  18.917 -51.705  1.00  0.00      LIG  
ATOM   9542 H6   LIG     1     -26.684  21.261 -54.224  1.00  0.00      LIG  
ATOM   9543 H7   LIG     1     -28.713  19.807 -55.988  1.00  0.00      LIG  
ATOM   9544 H8   LIG     1     -27.324  21.530 -57.124  1.00  0.00      LIG  
ATOM   9545 H9   LIG     1     -25.215  21.464 -55.814  1.00  0.00      LIG  
ATOM   9546 H10  LIG     1     -24.930  21.140 -57.531  1.00  0.00      LIG  
ATOM   9547 H11  LIG     1     -24.906  18.929 -57.041  1.00  0.00      LIG  
ATOM   9548 H12  LIG     1     -28.042  19.507 -58.028  1.00  0.00      LIG  
ATOM   9549 H13  LIG     1     -26.186  18.837 -55.253  1.00  0.00      LIG  
ATOM   9550 H14  LIG     1     -28.307  22.804 -54.145  1.00  0.00      LIG  
TER
REMARK  Energy: 2.88019
REMARK  SimpleFitness: 2.88019
REMARK  FullFitness: -2632.9407
REMARK  InterFull: -26.2727
REMARK  IntraFull: 59.987
REMARK  solvFull: -3069.86
REMARK  surfFull: 403.205
REMARK  extraFull: 0.0
REMARK  deltaGcompsolvpol: -3069.86
REMARK  deltaGcompsolvnonpol: 403.205
REMARK  deltaGprotsolvpol: -3070.97
REMARK  deltaGprotsolvnonpol: 403.01
REMARK  deltaGligsolvpol: -15.6393
REMARK  deltaGligsolvnonpol: 6.7887
REMARK  deltaGvdw: -26.2727
REMARK  deltaGelec: 0.0
REMARK  deltaG: -6.074115
REMARK  Cluster: 9
REMARK  ClusterRank: 2
ATOM   9521 C    LIG     1     -31.814  18.931 -53.841  1.00  0.00      LIG  
ATOM   9522 C1   LIG     1     -30.845  20.021 -53.500  1.00  0.00      LIG  
ATOM   9523 O    LIG     1     -31.193  21.178 -53.323  1.00  0.00      LIG  
ATOM   9524 N    LIG     1     -29.545  19.576 -53.485  1.00  0.00      LIG  
ATOM   9525 C2   LIG     1     -28.423  20.463 -53.217  1.00  0.00      LIG  
ATOM   9526 C3   LIG     1     -27.476  19.680 -52.352  1.00  0.00      LIG  
ATOM   9527 O1   LIG     1     -26.341  20.068 -52.118  1.00  0.00      LIG  
ATOM   9528 C4   LIG     1     -27.711  20.986 -54.479  1.00  0.00      LIG  
ATOM   9529 C5   LIG     1     -27.689  19.997 -55.653  1.00  0.00      LIG  
ATOM   9530 C6   LIG     1     -26.903  20.559 -56.852  1.00  0.00      LIG  
ATOM   9531 C7   LIG     1     -25.399  20.752 -56.622  1.00  0.00      LIG  
ATOM   9532 O2   LIG     1     -24.728  19.536 -56.301  1.00  0.00      LIG  
ATOM   9533 O3   LIG     1     -27.093  19.715 -57.990  1.00  0.00      LIG  
ATOM   9534 O4   LIG     1     -27.156  18.742 -55.234  1.00  0.00      LIG  
ATOM   9535 O5   LIG     1     -28.341  22.193 -54.902  1.00  0.00      LIG  
ATOM   9536 H    LIG     1     -31.860  18.814 -54.927  1.00  0.00      LIG  
ATOM   9537 H1   LIG     1     -32.800  19.204 -53.460  1.00  0.00      LIG  
ATOM   9538 H2   LIG     1     -31.512  17.985 -53.381  1.00  0.00      LIG  
ATOM   9539 H3   LIG     1     -29.360  18.601 -53.703  1.00  0.00      LIG  
ATOM   9540 H4   LIG     1     -28.790  21.296 -52.607  1.00  0.00      LIG  
ATOM   9541 H5   LIG     1     -27.931  18.917 -51.705  1.00  0.00      LIG  
ATOM   9542 H6   LIG     1     -26.684  21.261 -54.224  1.00  0.00      LIG  
ATOM   9543 H7   LIG     1     -28.713  19.807 -55.988  1.00  0.00      LIG  
ATOM   9544 H8   LIG     1     -27.324  21.530 -57.124  1.00  0.00      LIG  
ATOM   9545 H9   LIG     1     -25.215  21.464 -55.814  1.00  0.00      LIG  
ATOM   9546 H10  LIG     1     -24.930  21.140 -57.531  1.00  0.00      LIG  
ATOM   9547 H11  LIG     1     -24.906  18.929 -57.041  1.00  0.00      LIG  
ATOM   9548 H12  LIG     1     -28.042  19.507 -58.028  1.00  0.00      LIG  
ATOM   9549 H13  LIG     1     -26.186  18.837 -55.253  1.00  0.00      LIG  
ATOM   9550 H14  LIG     1     -28.307  22.804 -54.145  1.00  0.00      LIG  
TER
REMARK  Energy: 2.88019
REMARK  SimpleFitness: 2.88019
REMARK  FullFitness: -2632.9407
REMARK  InterFull: -26.2727
REMARK  IntraFull: 59.987
REMARK  solvFull: -3069.86
REMARK  surfFull: 403.205
REMARK  extraFull: 0.0
REMARK  deltaGcompsolvpol: -3069.86
REMARK  deltaGcompsolvnonpol: 403.205
REMARK  deltaGprotsolvpol: -3070.97
REMARK  deltaGprotsolvnonpol: 403.01
REMARK  deltaGligsolvpol: -15.6393
REMARK  deltaGligsolvnonpol: 6.7887
REMARK  deltaGvdw: -26.2727
REMARK  deltaGelec: 0.0
REMARK  deltaG: -6.074115
REMARK  Cluster: 9
REMARK  ClusterRank: 3
ATOM   9521 C    LIG     1     -31.814  18.931 -53.841  1.00  0.00      LIG  
ATOM   9522 C1   LIG     1     -30.845  20.021 -53.500  1.00  0.00      LIG  
ATOM   9523 O    LIG     1     -31.193  21.178 -53.323  1.00  0.00      LIG  
ATOM   9524 N    LIG     1     -29.545  19.576 -53.485  1.00  0.00      LIG  
ATOM   9525 C2   LIG     1     -28.423  20.463 -53.217  1.00  0.00      LIG  
ATOM   9526 C3   LIG     1     -27.476  19.680 -52.352  1.00  0.00      LIG  
ATOM   9527 O1   LIG     1     -26.341  20.068 -52.118  1.00  0.00      LIG  
ATOM   9528 C4   LIG     1     -27.711  20.986 -54.479  1.00  0.00      LIG  
ATOM   9529 C5   LIG     1     -27.689  19.997 -55.653  1.00  0.00      LIG  
ATOM   9530 C6   LIG     1     -26.903  20.559 -56.852  1.00  0.00      LIG  
ATOM   9531 C7   LIG     1     -25.399  20.752 -56.622  1.00  0.00      LIG  
ATOM   9532 O2   LIG     1     -24.728  19.536 -56.301  1.00  0.00      LIG  
ATOM   9533 O3   LIG     1     -27.093  19.715 -57.990  1.00  0.00      LIG  
ATOM   9534 O4   LIG     1     -27.156  18.742 -55.234  1.00  0.00      LIG  
ATOM   9535 O5   LIG     1     -28.341  22.193 -54.902  1.00  0.00      LIG  
ATOM   9536 H    LIG     1     -31.860  18.814 -54.927  1.00  0.00      LIG  
ATOM   9537 H1   LIG     1     -32.800  19.204 -53.460  1.00  0.00      LIG  
ATOM   9538 H2   LIG     1     -31.512  17.985 -53.381  1.00  0.00      LIG  
ATOM   9539 H3   LIG     1     -29.360  18.601 -53.703  1.00  0.00      LIG  
ATOM   9540 H4   LIG     1     -28.790  21.296 -52.607  1.00  0.00      LIG  
ATOM   9541 H5   LIG     1     -27.931  18.917 -51.705  1.00  0.00      LIG  
ATOM   9542 H6   LIG     1     -26.684  21.261 -54.224  1.00  0.00      LIG  
ATOM   9543 H7   LIG     1     -28.713  19.807 -55.988  1.00  0.00      LIG  
ATOM   9544 H8   LIG     1     -27.324  21.530 -57.124  1.00  0.00      LIG  
ATOM   9545 H9   LIG     1     -25.215  21.464 -55.814  1.00  0.00      LIG  
ATOM   9546 H10  LIG     1     -24.930  21.140 -57.531  1.00  0.00      LIG  
ATOM   9547 H11  LIG     1     -24.906  18.929 -57.041  1.00  0.00      LIG  
ATOM   9548 H12  LIG     1     -28.042  19.507 -58.028  1.00  0.00      LIG  
ATOM   9549 H13  LIG     1     -26.186  18.837 -55.253  1.00  0.00      LIG  
ATOM   9550 H14  LIG     1     -28.307  22.804 -54.145  1.00  0.00      LIG  
TER
REMARK  Energy: 2.27622
REMARK  SimpleFitness: 2.27622
REMARK  FullFitness: -2632.137
REMARK  InterFull: -24.8805
REMARK  IntraFull: 59.4448
REMARK  solvFull: -3069.82
REMARK  surfFull: 403.119
REMARK  extraFull: 0.0
REMARK  deltaGcompsolvpol: -3069.82
REMARK  deltaGcompsolvnonpol: 403.119
REMARK  deltaGprotsolvpol: -3070.97
REMARK  deltaGprotsolvnonpol: 403.01
REMARK  deltaGligsolvpol: -15.0234
REMARK  deltaGligsolvnonpol: 6.68066
REMARK  deltaGvdw: -24.8805
REMARK  deltaGelec: 0.0
REMARK  deltaG: -5.97557
REMARK  Cluster: 9
REMARK  ClusterRank: 4
ATOM   9521 C    LIG     1     -31.683  18.521 -53.643  1.00  0.00      LIG  
ATOM   9522 C1   LIG     1     -30.770  19.591 -53.125  1.00  0.00      LIG  
ATOM   9523 O    LIG     1     -31.085  20.320 -52.199  1.00  0.00      LIG  
ATOM   9524 N    LIG     1     -29.540  19.589 -53.744  1.00  0.00      LIG  
ATOM   9525 C2   LIG     1     -28.442  20.451 -53.324  1.00  0.00      LIG  
ATOM   9526 C3   LIG     1     -27.593  19.637 -52.382  1.00  0.00      LIG  
ATOM   9527 O1   LIG     1     -26.480  20.001 -52.036  1.00  0.00      LIG  
ATOM   9528 C4   LIG     1     -27.591  20.989 -54.492  1.00  0.00      LIG  
ATOM   9529 C5   LIG     1     -27.506  20.044 -55.700  1.00  0.00      LIG  
ATOM   9530 C6   LIG     1     -26.607  20.613 -56.813  1.00  0.00      LIG  
ATOM   9531 C7   LIG     1     -25.123  20.749 -56.454  1.00  0.00      LIG  
ATOM   9532 O2   LIG     1     -24.520  19.501 -56.124  1.00  0.00      LIG  
ATOM   9533 O3   LIG     1     -26.726  19.808 -57.989  1.00  0.00      LIG  
ATOM   9534 O4   LIG     1     -27.053  18.757 -55.282  1.00  0.00      LIG  
ATOM   9535 O5   LIG     1     -28.133  22.237 -54.919  1.00  0.00      LIG  
ATOM   9536 H    LIG     1     -31.343  18.136 -54.611  1.00  0.00      LIG  
ATOM   9537 H1   LIG     1     -32.687  18.938 -53.764  1.00  0.00      LIG  
ATOM   9538 H2   LIG     1     -31.705  17.702 -52.919  1.00  0.00      LIG  
ATOM   9539 H3   LIG     1     -29.339  18.841 -54.401  1.00  0.00      LIG  
ATOM   9540 H4   LIG     1     -28.859  21.273 -52.732  1.00  0.00      LIG  
ATOM   9541 H5   LIG     1     -28.134  18.896 -51.775  1.00  0.00      LIG  
ATOM   9542 H6   LIG     1     -26.580  21.210 -54.139  1.00  0.00      LIG  
ATOM   9543 H7   LIG     1     -28.506  19.902 -56.124  1.00  0.00      LIG  
ATOM   9544 H8   LIG     1     -26.975  21.605 -57.089  1.00  0.00      LIG  
ATOM   9545 H9   LIG     1     -24.983  21.428 -55.610  1.00  0.00      LIG  
ATOM   9546 H10  LIG     1     -24.569  21.151 -57.307  1.00  0.00      LIG  
ATOM   9547 H11  LIG     1     -24.674  18.924 -56.893  1.00  0.00      LIG  
ATOM   9548 H12  LIG     1     -27.675  19.649 -58.127  1.00  0.00      LIG  
ATOM   9549 H13  LIG     1     -26.082  18.820 -55.209  1.00  0.00      LIG  
ATOM   9550 H14  LIG     1     -28.054  22.849 -54.166  1.00  0.00      LIG  
TER
REMARK  Energy: 7.16523
REMARK  SimpleFitness: 7.16523
REMARK  FullFitness: -2629.5247
REMARK  InterFull: -35.8875
REMARK  IntraFull: 69.9908
REMARK  solvFull: -3066.99
REMARK  surfFull: 403.362
REMARK  extraFull: 0.0
REMARK  deltaGcompsolvpol: -3066.99
REMARK  deltaGcompsolvnonpol: 403.362
REMARK  deltaGprotsolvpol: -3070.97
REMARK  deltaGprotsolvnonpol: 403.01
REMARK  deltaGligsolvpol: -18.7547
REMARK  deltaGligsolvnonpol: 6.47397
REMARK  deltaGvdw: -35.8875
REMARK  deltaGelec: 0.0
REMARK  deltaG: -6.5727344
REMARK  Cluster: 9
REMARK  ClusterRank: 5
ATOM   9521 C    LIG     1     -31.828  18.795 -53.256  1.00  0.00      LIG  
ATOM   9522 C1   LIG     1     -30.464  19.091 -53.794  1.00  0.00      LIG  
ATOM   9523 O    LIG     1     -30.005  18.459 -54.731  1.00  0.00      LIG  
ATOM   9524 N    LIG     1     -29.839  20.080 -53.063  1.00  0.00      LIG  
ATOM   9525 C2   LIG     1     -28.468  20.556 -53.222  1.00  0.00      LIG  
ATOM   9526 C3   LIG     1     -27.601  19.723 -52.308  1.00  0.00      LIG  
ATOM   9527 O1   LIG     1     -26.459  20.055 -52.028  1.00  0.00      LIG  
ATOM   9528 C4   LIG     1     -27.942  20.657 -54.678  1.00  0.00      LIG  
ATOM   9529 C5   LIG     1     -26.975  21.839 -54.811  1.00  0.00      LIG  
ATOM   9530 C6   LIG     1     -26.379  21.983 -56.216  1.00  0.00      LIG  
ATOM   9531 C7   LIG     1     -25.657  23.315 -56.410  1.00  0.00      LIG  
ATOM   9532 O2   LIG     1     -24.677  23.523 -55.396  1.00  0.00      LIG  
ATOM   9533 O3   LIG     1     -25.450  20.933 -56.484  1.00  0.00      LIG  
ATOM   9534 O4   LIG     1     -27.709  23.021 -54.508  1.00  0.00      LIG  
ATOM   9535 O5   LIG     1     -27.325  19.443 -55.121  1.00  0.00      LIG  
ATOM   9536 H    LIG     1     -32.427  18.338 -54.047  1.00  0.00      LIG  
ATOM   9537 H1   LIG     1     -32.323  19.715 -52.930  1.00  0.00      LIG  
ATOM   9538 H2   LIG     1     -31.741  18.104 -52.413  1.00  0.00      LIG  
ATOM   9539 H3   LIG     1     -30.358  20.450 -52.274  1.00  0.00      LIG  
ATOM   9540 H4   LIG     1     -28.494  21.550 -52.771  1.00  0.00      LIG  
ATOM   9541 H5   LIG     1     -27.887  18.664 -52.220  1.00  0.00      LIG  
ATOM   9542 H6   LIG     1     -28.791  20.847 -55.343  1.00  0.00      LIG  
ATOM   9543 H7   LIG     1     -26.171  21.723 -54.078  1.00  0.00      LIG  
ATOM   9544 H8   LIG     1     -27.179  21.914 -56.959  1.00  0.00      LIG  
ATOM   9545 H9   LIG     1     -26.355  24.156 -56.387  1.00  0.00      LIG  
ATOM   9546 H10  LIG     1     -25.136  23.326 -57.372  1.00  0.00      LIG  
ATOM   9547 H11  LIG     1     -25.143  23.864 -54.608  1.00  0.00      LIG  
ATOM   9548 H12  LIG     1     -24.626  21.179 -56.027  1.00  0.00      LIG  
ATOM   9549 H13  LIG     1     -27.083  23.644 -54.085  1.00  0.00      LIG  
ATOM   9550 H14  LIG     1     -26.740  19.684 -55.863  1.00  0.00      LIG  
TER
REMARK  Energy: 7.15466
REMARK  SimpleFitness: 7.15466
REMARK  FullFitness: -2629.4944
REMARK  InterFull: -35.8657
REMARK  IntraFull: 69.9662
REMARK  solvFull: -3066.93
REMARK  surfFull: 403.335
REMARK  extraFull: 0.0
REMARK  deltaGcompsolvpol: -3066.93
REMARK  deltaGcompsolvnonpol: 403.335
REMARK  deltaGprotsolvpol: -3070.97
REMARK  deltaGprotsolvnonpol: 403.01
REMARK  deltaGligsolvpol: -18.7633
REMARK  deltaGligsolvnonpol: 6.47304
REMARK  deltaGvdw: -35.8657
REMARK  deltaGelec: 0.0
REMARK  deltaG: -6.5689373
REMARK  Cluster: 9
REMARK  ClusterRank: 6
ATOM   9521 C    LIG     1     -31.845  18.800 -53.332  1.00  0.00      LIG  
ATOM   9522 C1   LIG     1     -30.470  19.088 -53.843  1.00  0.00      LIG  
ATOM   9523 O    LIG     1     -29.993  18.449 -54.766  1.00  0.00      LIG  
ATOM   9524 N    LIG     1     -29.856  20.080 -53.106  1.00  0.00      LIG  
ATOM   9525 C2   LIG     1     -28.479  20.550 -53.241  1.00  0.00      LIG  
ATOM   9526 C3   LIG     1     -27.631  19.715 -52.312  1.00  0.00      LIG  
ATOM   9527 O1   LIG     1     -26.494  20.044 -52.009  1.00  0.00      LIG  
ATOM   9528 C4   LIG     1     -27.928  20.650 -54.687  1.00  0.00      LIG  
ATOM   9529 C5   LIG     1     -26.954  21.828 -54.802  1.00  0.00      LIG  
ATOM   9530 C6   LIG     1     -26.323  21.965 -56.193  1.00  0.00      LIG  
ATOM   9531 C7   LIG     1     -25.589  23.293 -56.371  1.00  0.00      LIG  
ATOM   9532 O2   LIG     1     -24.628  23.493 -55.336  1.00  0.00      LIG  
ATOM   9533 O3   LIG     1     -25.394  20.909 -56.436  1.00  0.00      LIG  
ATOM   9534 O4   LIG     1     -27.692  23.013 -54.520  1.00  0.00      LIG  
ATOM   9535 O5   LIG     1     -27.309  19.432 -55.119  1.00  0.00      LIG  
ATOM   9536 H    LIG     1     -32.432  18.348 -54.136  1.00  0.00      LIG  
ATOM   9537 H1   LIG     1     -32.342  19.722 -53.013  1.00  0.00      LIG  
ATOM   9538 H2   LIG     1     -31.778  18.105 -52.491  1.00  0.00      LIG  
ATOM   9539 H3   LIG     1     -30.390  20.459 -52.332  1.00  0.00      LIG  
ATOM   9540 H4   LIG     1     -28.509  21.544 -52.791  1.00  0.00      LIG  
ATOM   9541 H5   LIG     1     -27.919  18.655 -52.234  1.00  0.00      LIG  
ATOM   9542 H6   LIG     1     -28.764  20.843 -55.367  1.00  0.00      LIG  
ATOM   9543 H7   LIG     1     -26.169  21.712 -54.050  1.00  0.00      LIG  
ATOM   9544 H8   LIG     1     -27.105  21.900 -56.954  1.00  0.00      LIG  
ATOM   9545 H9   LIG     1     -26.281  24.139 -56.361  1.00  0.00      LIG  
ATOM   9546 H10  LIG     1     -25.048  23.301 -57.322  1.00  0.00      LIG  
ATOM   9547 H11  LIG     1     -25.108  23.848 -54.563  1.00  0.00      LIG  
ATOM   9548 H12  LIG     1     -24.583  21.145 -55.950  1.00  0.00      LIG  
ATOM   9549 H13  LIG     1     -27.072  23.642 -54.101  1.00  0.00      LIG  
ATOM   9550 H14  LIG     1     -26.706  19.672 -55.847  1.00  0.00      LIG  
TER
REMARK  Energy: 7.28585
REMARK  SimpleFitness: 7.28585
REMARK  FullFitness: -2629.4734
REMARK  InterFull: -36.0112
REMARK  IntraFull: 70.2089
REMARK  solvFull: -3067.1
REMARK  surfFull: 403.429
REMARK  extraFull: 0.0
REMARK  deltaGcompsolvpol: -3067.1
REMARK  deltaGcompsolvnonpol: 403.429
REMARK  deltaGprotsolvpol: -3070.97
REMARK  deltaGprotsolvnonpol: 403.01
REMARK  deltaGligsolvpol: -18.738
REMARK  deltaGligsolvnonpol: 6.46494
REMARK  deltaGvdw: -36.0112
REMARK  deltaGelec: 0.0
REMARK  deltaG: -6.5850058
REMARK  Cluster: 9
REMARK  ClusterRank: 7
ATOM   9521 C    LIG     1     -31.708  18.658 -53.028  1.00  0.00      LIG  
ATOM   9522 C1   LIG     1     -30.402  19.033 -53.657  1.00  0.00      LIG  
ATOM   9523 O    LIG     1     -30.000  18.456 -54.654  1.00  0.00      LIG  
ATOM   9524 N    LIG     1     -29.760  20.026 -52.946  1.00  0.00      LIG  
ATOM   9525 C2   LIG     1     -28.415  20.546 -53.175  1.00  0.00      LIG  
ATOM   9526 C3   LIG     1     -27.487  19.737 -52.301  1.00  0.00      LIG  
ATOM   9527 O1   LIG     1     -26.341  20.097 -52.077  1.00  0.00      LIG  
ATOM   9528 C4   LIG     1     -27.956  20.659 -54.652  1.00  0.00      LIG  
ATOM   9529 C5   LIG     1     -27.011  21.854 -54.822  1.00  0.00      LIG  
ATOM   9530 C6   LIG     1     -26.481  22.013 -56.252  1.00  0.00      LIG  
ATOM   9531 C7   LIG     1     -25.791  23.359 -56.470  1.00  0.00      LIG  
ATOM   9532 O2   LIG     1     -24.773  23.581 -55.498  1.00  0.00      LIG  
ATOM   9533 O3   LIG     1     -25.547  20.980 -56.565  1.00  0.00      LIG  
ATOM   9534 O4   LIG     1     -27.745  23.025 -54.481  1.00  0.00      LIG  
ATOM   9535 O5   LIG     1     -27.340  19.455 -55.125  1.00  0.00      LIG  
ATOM   9536 H    LIG     1     -32.464  18.565 -53.812  1.00  0.00      LIG  
ATOM   9537 H1   LIG     1     -32.041  19.414 -52.310  1.00  0.00      LIG  
ATOM   9538 H2   LIG     1     -31.589  17.703 -52.511  1.00  0.00      LIG  
ATOM   9539 H3   LIG     1     -30.231  20.350 -52.108  1.00  0.00      LIG  
ATOM   9540 H4   LIG     1     -28.449  21.539 -52.723  1.00  0.00      LIG  
ATOM   9541 H5   LIG     1     -27.743  18.671 -52.195  1.00  0.00      LIG  
ATOM   9542 H6   LIG     1     -28.836  20.838 -55.278  1.00  0.00      LIG  
ATOM   9543 H7   LIG     1     -26.173  21.746 -54.127  1.00  0.00      LIG  
ATOM   9544 H8   LIG     1     -27.311  21.934 -56.959  1.00  0.00      LIG  
ATOM   9545 H9   LIG     1     -26.502  24.187 -56.413  1.00  0.00      LIG  
ATOM   9546 H10  LIG     1     -25.313  23.384 -57.454  1.00  0.00      LIG  
ATOM   9547 H11  LIG     1     -25.212  23.894 -54.684  1.00  0.00      LIG  
ATOM   9548 H12  LIG     1     -24.712  21.229 -56.129  1.00  0.00      LIG  
ATOM   9549 H13  LIG     1     -27.111  23.650 -54.074  1.00  0.00      LIG  
ATOM   9550 H14  LIG     1     -26.792  19.707 -55.891  1.00  0.00      LIG  
TER
REMARK  Energy: 6.55415
REMARK  SimpleFitness: 6.55415
REMARK  FullFitness: -2627.4578
REMARK  InterFull: -24.7079
REMARK  IntraFull: 64.772
REMARK  solvFull: -3070.64
REMARK  surfFull: 403.118
REMARK  extraFull: 0.0
REMARK  deltaGcompsolvpol: -3070.64
REMARK  deltaGcompsolvnonpol: 403.118
REMARK  deltaGprotsolvpol: -3070.97
REMARK  deltaGprotsolvnonpol: 403.01
REMARK  deltaGligsolvpol: -15.4072
REMARK  deltaGligsolvnonpol: 6.51522
REMARK  deltaGvdw: -24.7079
REMARK  deltaGelec: 0.0
REMARK  deltaG: -5.970369
REMARK  Cluster: 9
REMARK  ClusterRank: 8
ATOM   9521 C    LIG     1     -31.680  18.666 -53.924  1.00  0.00      LIG  
ATOM   9522 C1   LIG     1     -30.794  19.596 -53.157  1.00  0.00      LIG  
ATOM   9523 O    LIG     1     -31.111  20.057 -52.071  1.00  0.00      LIG  
ATOM   9524 N    LIG     1     -29.576  19.786 -53.771  1.00  0.00      LIG  
ATOM   9525 C2   LIG     1     -28.519  20.593 -53.172  1.00  0.00      LIG  
ATOM   9526 C3   LIG     1     -27.663  19.687 -52.324  1.00  0.00      LIG  
ATOM   9527 O1   LIG     1     -26.547  20.009 -51.948  1.00  0.00      LIG  
ATOM   9528 C4   LIG     1     -27.657  21.366 -54.185  1.00  0.00      LIG  
ATOM   9529 C5   LIG     1     -27.047  20.584 -55.378  1.00  0.00      LIG  
ATOM   9530 C6   LIG     1     -25.584  20.955 -55.682  1.00  0.00      LIG  
ATOM   9531 C7   LIG     1     -25.406  22.246 -56.479  1.00  0.00      LIG  
ATOM   9532 O2   LIG     1     -25.989  23.382 -55.851  1.00  0.00      LIG  
ATOM   9533 O3   LIG     1     -24.807  21.014 -54.484  1.00  0.00      LIG  
ATOM   9534 O4   LIG     1     -27.072  19.173 -55.160  1.00  0.00      LIG  
ATOM   9535 O5   LIG     1     -28.436  22.442 -54.705  1.00  0.00      LIG  
ATOM   9536 H    LIG     1     -32.715  18.822 -53.607  1.00  0.00      LIG  
ATOM   9537 H1   LIG     1     -31.382  17.634 -53.720  1.00  0.00      LIG  
ATOM   9538 H2   LIG     1     -31.608  18.865 -54.998  1.00  0.00      LIG  
ATOM   9539 H3   LIG     1     -29.360  19.251 -54.606  1.00  0.00      LIG  
ATOM   9540 H4   LIG     1     -28.995  21.298 -52.484  1.00  0.00      LIG  
ATOM   9541 H5   LIG     1     -28.197  18.871 -51.813  1.00  0.00      LIG  
ATOM   9542 H6   LIG     1     -26.860  21.859 -53.628  1.00  0.00      LIG  
ATOM   9543 H7   LIG     1     -27.636  20.760 -56.283  1.00  0.00      LIG  
ATOM   9544 H8   LIG     1     -25.137  20.154 -56.279  1.00  0.00      LIG  
ATOM   9545 H9   LIG     1     -25.870  22.139 -57.462  1.00  0.00      LIG  
ATOM   9546 H10  LIG     1     -24.342  22.461 -56.620  1.00  0.00      LIG  
ATOM   9547 H11  LIG     1     -25.585  23.462 -54.966  1.00  0.00      LIG  
ATOM   9548 H12  LIG     1     -25.132  20.302 -53.905  1.00  0.00      LIG  
ATOM   9549 H13  LIG     1     -26.624  18.762 -55.920  1.00  0.00      LIG  
ATOM   9550 H14  LIG     1     -27.823  22.989 -55.231  1.00  0.00      LIG  
TER
REMARK  Energy: 8.21647
REMARK  SimpleFitness: 8.21647
REMARK  FullFitness: -2626.2378
REMARK  InterFull: -29.4692
REMARK  IntraFull: 69.9055
REMARK  solvFull: -3069.78
REMARK  surfFull: 403.106
REMARK  extraFull: 0.0
REMARK  deltaGcompsolvpol: -3069.78
REMARK  deltaGcompsolvnonpol: 403.106
REMARK  deltaGprotsolvpol: -3070.97
REMARK  deltaGprotsolvnonpol: 403.01
REMARK  deltaGligsolvpol: -17.7939
REMARK  deltaGligsolvnonpol: 6.58668
REMARK  deltaGvdw: -29.4692
REMARK  deltaGelec: 0.0
REMARK  deltaG: -6.2299957
REMARK  Cluster: 9
REMARK  ClusterRank: 9
ATOM   9521 C    LIG     1     -31.780  18.584 -53.916  1.00  0.00      LIG  
ATOM   9522 C1   LIG     1     -30.921  19.735 -53.495  1.00  0.00      LIG  
ATOM   9523 O    LIG     1     -31.382  20.838 -53.244  1.00  0.00      LIG  
ATOM   9524 N    LIG     1     -29.586  19.405 -53.467  1.00  0.00      LIG  
ATOM   9525 C2   LIG     1     -28.568  20.364 -53.055  1.00  0.00      LIG  
ATOM   9526 C3   LIG     1     -27.539  19.594 -52.278  1.00  0.00      LIG  
ATOM   9527 O1   LIG     1     -26.440  20.055 -52.013  1.00  0.00      LIG  
ATOM   9528 C4   LIG     1     -27.907  21.183 -54.181  1.00  0.00      LIG  
ATOM   9529 C5   LIG     1     -27.274  20.432 -55.381  1.00  0.00      LIG  
ATOM   9530 C6   LIG     1     -25.847  20.898 -55.721  1.00  0.00      LIG  
ATOM   9531 C7   LIG     1     -25.786  22.206 -56.511  1.00  0.00      LIG  
ATOM   9532 O2   LIG     1     -26.418  23.296 -55.847  1.00  0.00      LIG  
ATOM   9533 O3   LIG     1     -25.044  21.011 -54.545  1.00  0.00      LIG  
ATOM   9534 O4   LIG     1     -27.210  19.023 -55.164  1.00  0.00      LIG  
ATOM   9535 O5   LIG     1     -28.853  22.115 -54.697  1.00  0.00      LIG  
ATOM   9536 H    LIG     1     -32.812  18.786 -53.616  1.00  0.00      LIG  
ATOM   9537 H1   LIG     1     -31.448  17.662 -53.429  1.00  0.00      LIG  
ATOM   9538 H2   LIG     1     -31.729  18.469 -55.002  1.00  0.00      LIG  
ATOM   9539 H3   LIG     1     -29.325  18.438 -53.635  1.00  0.00      LIG  
ATOM   9540 H4   LIG     1     -29.045  21.049 -52.345  1.00  0.00      LIG  
ATOM   9541 H5   LIG     1     -27.911  18.720 -51.724  1.00  0.00      LIG  
ATOM   9542 H6   LIG     1     -27.147  21.813 -53.714  1.00  0.00      LIG  
ATOM   9543 H7   LIG     1     -27.883  20.566 -56.281  1.00  0.00      LIG  
ATOM   9544 H8   LIG     1     -25.363  20.132 -56.334  1.00  0.00      LIG  
ATOM   9545 H9   LIG     1     -26.279  22.078 -57.478  1.00  0.00      LIG  
ATOM   9546 H10  LIG     1     -24.746  22.495 -56.688  1.00  0.00      LIG  
ATOM   9547 H11  LIG     1     -25.970  23.406 -54.987  1.00  0.00      LIG  
ATOM   9548 H12  LIG     1     -25.307  20.282 -53.955  1.00  0.00      LIG  
ATOM   9549 H13  LIG     1     -28.130  18.713 -55.115  1.00  0.00      LIG  
ATOM   9550 H14  LIG     1     -28.355  22.700 -55.297  1.00  0.00      LIG  
TER
REMARK  Energy: 8.18105
REMARK  SimpleFitness: 8.18105
REMARK  FullFitness: -2626.2231
REMARK  InterFull: -29.2851
REMARK  IntraFull: 69.7179
REMARK  solvFull: -3069.76
REMARK  surfFull: 403.104
REMARK  extraFull: 0.0
REMARK  deltaGcompsolvpol: -3069.76
REMARK  deltaGcompsolvnonpol: 403.104
REMARK  deltaGprotsolvpol: -3070.97
REMARK  deltaGprotsolvnonpol: 403.01
REMARK  deltaGligsolvpol: -17.7736
REMARK  deltaGligsolvnonpol: 6.58934
REMARK  deltaGvdw: -29.2851
REMARK  deltaGelec: 0.0
REMARK  deltaG: -6.2130365
REMARK  Cluster: 9
REMARK  ClusterRank: 10
ATOM   9521 C    LIG     1     -31.774  18.614 -53.912  1.00  0.00      LIG  
ATOM   9522 C1   LIG     1     -30.906  19.778 -53.549  1.00  0.00      LIG  
ATOM   9523 O    LIG     1     -31.368  20.866 -53.245  1.00  0.00      LIG  
ATOM   9524 N    LIG     1     -29.575  19.436 -53.496  1.00  0.00      LIG  
ATOM   9525 C2   LIG     1     -28.556  20.389 -53.069  1.00  0.00      LIG  
ATOM   9526 C3   LIG     1     -27.538  19.610 -52.287  1.00  0.00      LIG  
ATOM   9527 O1   LIG     1     -26.435  20.062 -52.018  1.00  0.00      LIG  
ATOM   9528 C4   LIG     1     -27.885  21.211 -54.185  1.00  0.00      LIG  
ATOM   9529 C5   LIG     1     -27.251  20.464 -55.388  1.00  0.00      LIG  
ATOM   9530 C6   LIG     1     -25.828  20.940 -55.732  1.00  0.00      LIG  
ATOM   9531 C7   LIG     1     -25.777  22.246 -56.526  1.00  0.00      LIG  
ATOM   9532 O2   LIG     1     -26.416  23.334 -55.865  1.00  0.00      LIG  
ATOM   9533 O3   LIG     1     -25.023  21.060 -54.557  1.00  0.00      LIG  
ATOM   9534 O4   LIG     1     -27.178  19.056 -55.170  1.00  0.00      LIG  
ATOM   9535 O5   LIG     1     -28.825  22.151 -54.700  1.00  0.00      LIG  
ATOM   9536 H    LIG     1     -32.728  18.989 -54.290  1.00  0.00      LIG  
ATOM   9537 H1   LIG     1     -31.944  18.001 -53.022  1.00  0.00      LIG  
ATOM   9538 H2   LIG     1     -31.300  18.009 -54.691  1.00  0.00      LIG  
ATOM   9539 H3   LIG     1     -29.316  18.470 -53.669  1.00  0.00      LIG  
ATOM   9540 H4   LIG     1     -29.037  21.072 -52.360  1.00  0.00      LIG  
ATOM   9541 H5   LIG     1     -27.921  18.742 -51.731  1.00  0.00      LIG  
ATOM   9542 H6   LIG     1     -27.124  21.834 -53.710  1.00  0.00      LIG  
ATOM   9543 H7   LIG     1     -27.864  20.594 -56.285  1.00  0.00      LIG  
ATOM   9544 H8   LIG     1     -25.339  20.175 -56.344  1.00  0.00      LIG  
ATOM   9545 H9   LIG     1     -26.270  22.111 -57.492  1.00  0.00      LIG  
ATOM   9546 H10  LIG     1     -24.740  22.541 -56.704  1.00  0.00      LIG  
ATOM   9547 H11  LIG     1     -25.970  23.448 -55.004  1.00  0.00      LIG  
ATOM   9548 H12  LIG     1     -25.272  20.324 -53.971  1.00  0.00      LIG  
ATOM   9549 H13  LIG     1     -28.096  18.741 -55.119  1.00  0.00      LIG  
ATOM   9550 H14  LIG     1     -28.321  22.737 -55.294  1.00  0.00      LIG  
TER
REMARK  Energy: 8.83096
REMARK  SimpleFitness: 8.83096
REMARK  FullFitness: -2623.296
REMARK  InterFull: -28.16
REMARK  IntraFull: 71.1591
REMARK  solvFull: -3070.16
REMARK  surfFull: 403.865
REMARK  extraFull: 0.0
REMARK  deltaGcompsolvpol: -3070.16
REMARK  deltaGcompsolvnonpol: 403.865
REMARK  deltaGprotsolvpol: -3070.97
REMARK  deltaGprotsolvnonpol: 403.01
REMARK  deltaGligsolvpol: -19.0853
REMARK  deltaGligsolvnonpol: 6.52397
REMARK  deltaGvdw: -28.16
REMARK  deltaGelec: 0.0
REMARK  deltaG: -5.9726267
REMARK  Cluster: 9
REMARK  ClusterRank: 11
ATOM   9521 C    LIG     1     -31.641  18.514 -53.324  1.00  0.00      LIG  
ATOM   9522 C1   LIG     1     -30.659  19.540 -52.848  1.00  0.00      LIG  
ATOM   9523 O    LIG     1     -30.831  20.180 -51.824  1.00  0.00      LIG  
ATOM   9524 N    LIG     1     -29.539  19.615 -53.646  1.00  0.00      LIG  
ATOM   9525 C2   LIG     1     -28.395  20.463 -53.326  1.00  0.00      LIG  
ATOM   9526 C3   LIG     1     -27.525  19.549 -52.490  1.00  0.00      LIG  
ATOM   9527 O1   LIG     1     -26.605  19.975 -51.808  1.00  0.00      LIG  
ATOM   9528 C4   LIG     1     -27.668  20.952 -54.601  1.00  0.00      LIG  
ATOM   9529 C5   LIG     1     -28.441  22.079 -55.317  1.00  0.00      LIG  
ATOM   9530 C6   LIG     1     -27.793  22.586 -56.617  1.00  0.00      LIG  
ATOM   9531 C7   LIG     1     -26.756  23.677 -56.364  1.00  0.00      LIG  
ATOM   9532 O2   LIG     1     -26.493  24.380 -57.573  1.00  0.00      LIG  
ATOM   9533 O3   LIG     1     -27.170  21.508 -57.318  1.00  0.00      LIG  
ATOM   9534 O4   LIG     1     -29.758  21.640 -55.644  1.00  0.00      LIG  
ATOM   9535 O5   LIG     1     -26.360  21.445 -54.300  1.00  0.00      LIG  
ATOM   9536 H    LIG     1     -31.631  17.670 -52.629  1.00  0.00      LIG  
ATOM   9537 H1   LIG     1     -31.396  18.152 -54.328  1.00  0.00      LIG  
ATOM   9538 H2   LIG     1     -32.637  18.963 -53.348  1.00  0.00      LIG  
ATOM   9539 H3   LIG     1     -29.444  18.929 -54.389  1.00  0.00      LIG  
ATOM   9540 H4   LIG     1     -28.701  21.300 -52.690  1.00  0.00      LIG  
ATOM   9541 H5   LIG     1     -27.514  18.491 -52.794  1.00  0.00      LIG  
ATOM   9542 H6   LIG     1     -27.548  20.099 -55.275  1.00  0.00      LIG  
ATOM   9543 H7   LIG     1     -28.553  22.929 -54.640  1.00  0.00      LIG  
ATOM   9544 H8   LIG     1     -28.562  22.981 -57.289  1.00  0.00      LIG  
ATOM   9545 H9   LIG     1     -25.807  23.262 -56.014  1.00  0.00      LIG  
ATOM   9546 H10  LIG     1     -27.121  24.399 -55.631  1.00  0.00      LIG  
ATOM   9547 H11  LIG     1     -26.334  23.701 -58.252  1.00  0.00      LIG  
ATOM   9548 H12  LIG     1     -26.471  21.166 -56.733  1.00  0.00      LIG  
ATOM   9549 H13  LIG     1     -30.098  21.165 -54.866  1.00  0.00      LIG  
ATOM   9550 H14  LIG     1     -26.460  22.174 -53.661  1.00  0.00      LIG  
TER
REMARK  Energy: 9.88024
REMARK  SimpleFitness: 9.88024
REMARK  FullFitness: -2622.2478
REMARK  InterFull: -26.1604
REMARK  IntraFull: 72.7475
REMARK  solvFull: -3072.71
REMARK  surfFull: 403.875
REMARK  extraFull: 0.0
REMARK  deltaGcompsolvpol: -3072.71
REMARK  deltaGcompsolvnonpol: 403.875
REMARK  deltaGprotsolvpol: -3070.97
REMARK  deltaGprotsolvnonpol: 403.01
REMARK  deltaGligsolvpol: -19.7181
REMARK  deltaGligsolvnonpol: 6.5231
REMARK  deltaGvdw: -26.1604
REMARK  deltaGelec: 0.0
REMARK  deltaG: -5.8997707
REMARK  Cluster: 9
REMARK  ClusterRank: 12
ATOM   9521 C    LIG     1     -31.629  18.511 -53.310  1.00  0.00      LIG  
ATOM   9522 C1   LIG     1     -30.648  19.539 -52.837  1.00  0.00      LIG  
ATOM   9523 O    LIG     1     -30.819  20.179 -51.812  1.00  0.00      LIG  
ATOM   9524 N    LIG     1     -29.533  19.623 -53.642  1.00  0.00      LIG  
ATOM   9525 C2   LIG     1     -28.391  20.475 -53.325  1.00  0.00      LIG  
ATOM   9526 C3   LIG     1     -27.514  19.560 -52.496  1.00  0.00      LIG  
ATOM   9527 O1   LIG     1     -26.595  19.987 -51.814  1.00  0.00      LIG  
ATOM   9528 C4   LIG     1     -27.670  20.969 -54.602  1.00  0.00      LIG  
ATOM   9529 C5   LIG     1     -28.449  22.090 -55.320  1.00  0.00      LIG  
ATOM   9530 C6   LIG     1     -27.813  22.584 -56.632  1.00  0.00      LIG  
ATOM   9531 C7   LIG     1     -26.769  23.673 -56.398  1.00  0.00      LIG  
ATOM   9532 O2   LIG     1     -26.506  24.370 -57.612  1.00  0.00      LIG  
ATOM   9533 O3   LIG     1     -27.208  21.494 -57.330  1.00  0.00      LIG  
ATOM   9534 O4   LIG     1     -29.771  21.653 -55.631  1.00  0.00      LIG  
ATOM   9535 O5   LIG     1     -26.365  21.472 -54.302  1.00  0.00      LIG  
ATOM   9536 H    LIG     1     -31.638  17.683 -52.598  1.00  0.00      LIG  
ATOM   9537 H1   LIG     1     -31.368  18.125 -54.301  1.00  0.00      LIG  
ATOM   9538 H2   LIG     1     -32.621  18.968 -53.363  1.00  0.00      LIG  
ATOM   9539 H3   LIG     1     -29.439  18.940 -54.387  1.00  0.00      LIG  
ATOM   9540 H4   LIG     1     -28.696  21.309 -52.685  1.00  0.00      LIG  
ATOM   9541 H5   LIG     1     -27.496  18.505 -52.808  1.00  0.00      LIG  
ATOM   9542 H6   LIG     1     -27.544  20.115 -55.274  1.00  0.00      LIG  
ATOM   9543 H7   LIG     1     -28.553  22.947 -54.650  1.00  0.00      LIG  
ATOM   9544 H8   LIG     1     -28.588  22.978 -57.298  1.00  0.00      LIG  
ATOM   9545 H9   LIG     1     -25.821  23.260 -56.046  1.00  0.00      LIG  
ATOM   9546 H10  LIG     1     -27.131  24.402 -55.670  1.00  0.00      LIG  
ATOM   9547 H11  LIG     1     -27.348  24.419 -58.095  1.00  0.00      LIG  
ATOM   9548 H12  LIG     1     -26.442  21.216 -56.797  1.00  0.00      LIG  
ATOM   9549 H13  LIG     1     -30.099  21.174 -54.849  1.00  0.00      LIG  
ATOM   9550 H14  LIG     1     -26.471  22.210 -53.675  1.00  0.00      LIG  
TER
REMARK  Energy: 3.73362
REMARK  SimpleFitness: 3.73362
REMARK  FullFitness: -2632.9922
REMARK  InterFull: -24.0861
REMARK  IntraFull: 65.7729
REMARK  solvFull: -3077.51
REMARK  surfFull: 402.831
REMARK  extraFull: 0.0
REMARK  deltaGcompsolvpol: -3077.51
REMARK  deltaGcompsolvnonpol: 402.831
REMARK  deltaGprotsolvpol: -3070.97
REMARK  deltaGprotsolvnonpol: 403.01
REMARK  deltaGligsolvpol: -18.5408
REMARK  deltaGligsolvnonpol: 6.72223
REMARK  deltaGvdw: -24.0861
REMARK  deltaGelec: 0.0
REMARK  deltaG: -6.1869564
REMARK  Cluster: 10
REMARK  ClusterRank: 0
ATOM   9521 C    LIG     1     -31.387  18.286 -52.769  1.00  0.00      LIG  
ATOM   9522 C1   LIG     1     -30.343  19.357 -52.697  1.00  0.00      LIG  
ATOM   9523 O    LIG     1     -30.391  20.249 -51.868  1.00  0.00      LIG  
ATOM   9524 N    LIG     1     -29.389  19.250 -53.686  1.00  0.00      LIG  
ATOM   9525 C2   LIG     1     -28.329  20.234 -53.869  1.00  0.00      LIG  
ATOM   9526 C3   LIG     1     -27.138  19.770 -53.070  1.00  0.00      LIG  
ATOM   9527 O1   LIG     1     -26.024  20.253 -53.213  1.00  0.00      LIG  
ATOM   9528 C4   LIG     1     -27.981  20.553 -55.345  1.00  0.00      LIG  
ATOM   9529 C5   LIG     1     -27.800  19.390 -56.353  1.00  0.00      LIG  
ATOM   9530 C6   LIG     1     -26.507  18.602 -56.143  1.00  0.00      LIG  
ATOM   9531 C7   LIG     1     -26.343  17.449 -57.129  1.00  0.00      LIG  
ATOM   9532 O2   LIG     1     -27.133  16.331 -56.742  1.00  0.00      LIG  
ATOM   9533 O3   LIG     1     -25.398  19.485 -56.295  1.00  0.00      LIG  
ATOM   9534 O4   LIG     1     -28.925  18.510 -56.368  1.00  0.00      LIG  
ATOM   9535 O5   LIG     1     -29.002  21.417 -55.849  1.00  0.00      LIG  
ATOM   9536 H    LIG     1     -32.338  18.738 -53.063  1.00  0.00      LIG  
ATOM   9537 H1   LIG     1     -31.483  17.824 -51.783  1.00  0.00      LIG  
ATOM   9538 H2   LIG     1     -31.122  17.512 -53.496  1.00  0.00      LIG  
ATOM   9539 H3   LIG     1     -29.389  18.420 -54.271  1.00  0.00      LIG  
ATOM   9540 H4   LIG     1     -28.661  21.155 -53.378  1.00  0.00      LIG  
ATOM   9541 H5   LIG     1     -27.373  19.250 -52.127  1.00  0.00      LIG  
ATOM   9542 H6   LIG     1     -27.069  21.155 -55.360  1.00  0.00      LIG  
ATOM   9543 H7   LIG     1     -27.760  19.831 -57.355  1.00  0.00      LIG  
ATOM   9544 H8   LIG     1     -26.492  18.205 -55.129  1.00  0.00      LIG  
ATOM   9545 H9   LIG     1     -25.300  17.122 -57.173  1.00  0.00      LIG  
ATOM   9546 H10  LIG     1     -26.633  17.756 -58.137  1.00  0.00      LIG  
ATOM   9547 H11  LIG     1     -28.032  16.676 -56.586  1.00  0.00      LIG  
ATOM   9548 H12  LIG     1     -25.376  19.758 -57.228  1.00  0.00      LIG  
ATOM   9549 H13  LIG     1     -29.713  19.079 -56.427  1.00  0.00      LIG  
ATOM   9550 H14  LIG     1     -28.769  21.619 -56.772  1.00  0.00      LIG  
TER
REMARK  Energy: 3.73362
REMARK  SimpleFitness: 3.73362
REMARK  FullFitness: -2632.9922
REMARK  InterFull: -24.0861
REMARK  IntraFull: 65.7729
REMARK  solvFull: -3077.51
REMARK  surfFull: 402.831
REMARK  extraFull: 0.0
REMARK  deltaGcompsolvpol: -3077.51
REMARK  deltaGcompsolvnonpol: 402.831
REMARK  deltaGprotsolvpol: -3070.97
REMARK  deltaGprotsolvnonpol: 403.01
REMARK  deltaGligsolvpol: -18.5408
REMARK  deltaGligsolvnonpol: 6.72223
REMARK  deltaGvdw: -24.0861
REMARK  deltaGelec: 0.0
REMARK  deltaG: -6.1869564
REMARK  Cluster: 10
REMARK  ClusterRank: 1
ATOM   9521 C    LIG     1     -31.387  18.286 -52.769  1.00  0.00      LIG  
ATOM   9522 C1   LIG     1     -30.343  19.357 -52.697  1.00  0.00      LIG  
ATOM   9523 O    LIG     1     -30.391  20.249 -51.868  1.00  0.00      LIG  
ATOM   9524 N    LIG     1     -29.389  19.250 -53.686  1.00  0.00      LIG  
ATOM   9525 C2   LIG     1     -28.329  20.234 -53.869  1.00  0.00      LIG  
ATOM   9526 C3   LIG     1     -27.138  19.770 -53.070  1.00  0.00      LIG  
ATOM   9527 O1   LIG     1     -26.024  20.253 -53.213  1.00  0.00      LIG  
ATOM   9528 C4   LIG     1     -27.981  20.553 -55.345  1.00  0.00      LIG  
ATOM   9529 C5   LIG     1     -27.800  19.390 -56.353  1.00  0.00      LIG  
ATOM   9530 C6   LIG     1     -26.507  18.602 -56.143  1.00  0.00      LIG  
ATOM   9531 C7   LIG     1     -26.343  17.449 -57.129  1.00  0.00      LIG  
ATOM   9532 O2   LIG     1     -27.133  16.331 -56.742  1.00  0.00      LIG  
ATOM   9533 O3   LIG     1     -25.398  19.485 -56.295  1.00  0.00      LIG  
ATOM   9534 O4   LIG     1     -28.925  18.510 -56.368  1.00  0.00      LIG  
ATOM   9535 O5   LIG     1     -29.002  21.417 -55.849  1.00  0.00      LIG  
ATOM   9536 H    LIG     1     -32.338  18.738 -53.063  1.00  0.00      LIG  
ATOM   9537 H1   LIG     1     -31.483  17.824 -51.783  1.00  0.00      LIG  
ATOM   9538 H2   LIG     1     -31.122  17.512 -53.496  1.00  0.00      LIG  
ATOM   9539 H3   LIG     1     -29.389  18.420 -54.271  1.00  0.00      LIG  
ATOM   9540 H4   LIG     1     -28.661  21.155 -53.378  1.00  0.00      LIG  
ATOM   9541 H5   LIG     1     -27.373  19.250 -52.127  1.00  0.00      LIG  
ATOM   9542 H6   LIG     1     -27.069  21.155 -55.360  1.00  0.00      LIG  
ATOM   9543 H7   LIG     1     -27.760  19.831 -57.355  1.00  0.00      LIG  
ATOM   9544 H8   LIG     1     -26.492  18.205 -55.129  1.00  0.00      LIG  
ATOM   9545 H9   LIG     1     -25.300  17.122 -57.173  1.00  0.00      LIG  
ATOM   9546 H10  LIG     1     -26.633  17.756 -58.137  1.00  0.00      LIG  
ATOM   9547 H11  LIG     1     -28.032  16.676 -56.586  1.00  0.00      LIG  
ATOM   9548 H12  LIG     1     -25.376  19.758 -57.228  1.00  0.00      LIG  
ATOM   9549 H13  LIG     1     -29.713  19.079 -56.427  1.00  0.00      LIG  
ATOM   9550 H14  LIG     1     -28.769  21.619 -56.772  1.00  0.00      LIG  
TER
REMARK  Energy: 4.78294
REMARK  SimpleFitness: 4.78294
REMARK  FullFitness: -2632.291
REMARK  InterFull: -23.0495
REMARK  IntraFull: 65.4354
REMARK  solvFull: -3077.53
REMARK  surfFull: 402.853
REMARK  extraFull: 0.0
REMARK  deltaGcompsolvpol: -3077.53
REMARK  deltaGcompsolvnonpol: 402.853
REMARK  deltaGprotsolvpol: -3070.97
REMARK  deltaGprotsolvnonpol: 403.01
REMARK  deltaGligsolvpol: -18.3357
REMARK  deltaGligsolvnonpol: 6.72216
REMARK  deltaGvdw: -23.0495
REMARK  deltaGelec: 0.0
REMARK  deltaG: -6.100583
REMARK  Cluster: 10
REMARK  ClusterRank: 2
ATOM   9521 C    LIG     1     -30.858  18.800 -52.679  1.00  0.00      LIG  
ATOM   9522 C1   LIG     1     -29.683  19.728 -52.779  1.00  0.00      LIG  
ATOM   9523 O    LIG     1     -29.511  20.641 -51.988  1.00  0.00      LIG  
ATOM   9524 N    LIG     1     -28.878  19.489 -53.870  1.00  0.00      LIG  
ATOM   9525 C2   LIG     1     -27.769  20.367 -54.231  1.00  0.00      LIG  
ATOM   9526 C3   LIG     1     -26.547  19.908 -53.476  1.00  0.00      LIG  
ATOM   9527 O1   LIG     1     -25.420  20.291 -53.754  1.00  0.00      LIG  
ATOM   9528 C4   LIG     1     -27.516  20.514 -55.752  1.00  0.00      LIG  
ATOM   9529 C5   LIG     1     -27.516  19.250 -56.646  1.00  0.00      LIG  
ATOM   9530 C6   LIG     1     -26.293  18.358 -56.435  1.00  0.00      LIG  
ATOM   9531 C7   LIG     1     -26.308  17.117 -57.321  1.00  0.00      LIG  
ATOM   9532 O2   LIG     1     -27.160  16.116 -56.778  1.00  0.00      LIG  
ATOM   9533 O3   LIG     1     -25.115  19.105 -56.726  1.00  0.00      LIG  
ATOM   9534 O4   LIG     1     -28.717  18.492 -56.504  1.00  0.00      LIG  
ATOM   9535 O5   LIG     1     -28.496  21.419 -56.266  1.00  0.00      LIG  
ATOM   9536 H    LIG     1     -31.773  19.364 -52.883  1.00  0.00      LIG  
ATOM   9537 H1   LIG     1     -30.896  18.387 -51.668  1.00  0.00      LIG  
ATOM   9538 H2   LIG     1     -30.781  17.975 -53.395  1.00  0.00      LIG  
ATOM   9539 H3   LIG     1     -29.043  18.656 -54.428  1.00  0.00      LIG  
ATOM   9540 H4   LIG     1     -28.003  21.354 -53.818  1.00  0.00      LIG  
ATOM   9541 H5   LIG     1     -26.740  19.517 -52.464  1.00  0.00      LIG  
ATOM   9542 H6   LIG     1     -26.560  21.027 -55.895  1.00  0.00      LIG  
ATOM   9543 H7   LIG     1     -27.503  19.589 -57.687  1.00  0.00      LIG  
ATOM   9544 H8   LIG     1     -26.257  18.048 -55.391  1.00  0.00      LIG  
ATOM   9545 H9   LIG     1     -25.305  16.690 -57.411  1.00  0.00      LIG  
ATOM   9546 H10  LIG     1     -26.650  17.365 -58.329  1.00  0.00      LIG  
ATOM   9547 H11  LIG     1     -28.019  16.549 -56.619  1.00  0.00      LIG  
ATOM   9548 H12  LIG     1     -25.112  19.276 -57.683  1.00  0.00      LIG  
ATOM   9549 H13  LIG     1     -29.449  19.131 -56.569  1.00  0.00      LIG  
ATOM   9550 H14  LIG     1     -28.282  21.563 -57.203  1.00  0.00      LIG  
TER
REMARK  Energy: 5.02484
REMARK  SimpleFitness: 5.02484
REMARK  FullFitness: -2631.7207
REMARK  InterFull: -22.4951
REMARK  IntraFull: 65.2576
REMARK  solvFull: -3077.36
REMARK  surfFull: 402.877
REMARK  extraFull: 0.0
REMARK  deltaGcompsolvpol: -3077.36
REMARK  deltaGcompsolvnonpol: 402.877
REMARK  deltaGprotsolvpol: -3070.97
REMARK  deltaGprotsolvnonpol: 403.01
REMARK  deltaGligsolvpol: -18.2853
REMARK  deltaGligsolvnonpol: 6.7318
REMARK  deltaGvdw: -22.4951
REMARK  deltaGelec: 0.0
REMARK  deltaG: -6.039462
REMARK  Cluster: 10
REMARK  ClusterRank: 3
ATOM   9521 C    LIG     1     -30.543  19.049 -52.636  1.00  0.00      LIG  
ATOM   9522 C1   LIG     1     -29.358  19.953 -52.802  1.00  0.00      LIG  
ATOM   9523 O    LIG     1     -29.144  20.887 -52.047  1.00  0.00      LIG  
ATOM   9524 N    LIG     1     -28.587  19.657 -53.905  1.00  0.00      LIG  
ATOM   9525 C2   LIG     1     -27.465  20.493 -54.321  1.00  0.00      LIG  
ATOM   9526 C3   LIG     1     -26.238  20.011 -53.587  1.00  0.00      LIG  
ATOM   9527 O1   LIG     1     -25.106  20.347 -53.905  1.00  0.00      LIG  
ATOM   9528 C4   LIG     1     -27.252  20.591 -55.852  1.00  0.00      LIG  
ATOM   9529 C5   LIG     1     -27.342  19.306 -56.712  1.00  0.00      LIG  
ATOM   9530 C6   LIG     1     -26.171  18.349 -56.492  1.00  0.00      LIG  
ATOM   9531 C7   LIG     1     -26.263  17.095 -57.355  1.00  0.00      LIG  
ATOM   9532 O2   LIG     1     -27.174  16.157 -56.796  1.00  0.00      LIG  
ATOM   9533 O3   LIG     1     -24.954  19.021 -56.805  1.00  0.00      LIG  
ATOM   9534 O4   LIG     1     -28.582  18.623 -56.529  1.00  0.00      LIG  
ATOM   9535 O5   LIG     1     -28.202  21.531 -56.358  1.00  0.00      LIG  
ATOM   9536 H    LIG     1     -31.455  19.628 -52.799  1.00  0.00      LIG  
ATOM   9537 H1   LIG     1     -30.537  18.645 -51.620  1.00  0.00      LIG  
ATOM   9538 H2   LIG     1     -30.518  18.216 -53.347  1.00  0.00      LIG  
ATOM   9539 H3   LIG     1     -28.791  18.814 -54.433  1.00  0.00      LIG  
ATOM   9540 H4   LIG     1     -27.655  21.496 -53.925  1.00  0.00      LIG  
ATOM   9541 H5   LIG     1     -26.416  19.665 -52.556  1.00  0.00      LIG  
ATOM   9542 H6   LIG     1     -26.277  21.053 -56.035  1.00  0.00      LIG  
ATOM   9543 H7   LIG     1     -27.329  19.616 -57.761  1.00  0.00      LIG  
ATOM   9544 H8   LIG     1     -26.147  18.057 -55.443  1.00  0.00      LIG  
ATOM   9545 H9   LIG     1     -25.288  16.606 -57.435  1.00  0.00      LIG  
ATOM   9546 H10  LIG     1     -26.588  17.344 -58.369  1.00  0.00      LIG  
ATOM   9547 H11  LIG     1     -28.005  16.645 -56.645  1.00  0.00      LIG  
ATOM   9548 H12  LIG     1     -24.949  19.175 -57.765  1.00  0.00      LIG  
ATOM   9549 H13  LIG     1     -29.277  19.304 -56.581  1.00  0.00      LIG  
ATOM   9550 H14  LIG     1     -28.013  21.639 -57.306  1.00  0.00      LIG  
TER
REMARK  Energy: 5.02484
REMARK  SimpleFitness: 5.02484
REMARK  FullFitness: -2631.7207
REMARK  InterFull: -22.4951
REMARK  IntraFull: 65.2576
REMARK  solvFull: -3077.36
REMARK  surfFull: 402.877
REMARK  extraFull: 0.0
REMARK  deltaGcompsolvpol: -3077.36
REMARK  deltaGcompsolvnonpol: 402.877
REMARK  deltaGprotsolvpol: -3070.97
REMARK  deltaGprotsolvnonpol: 403.01
REMARK  deltaGligsolvpol: -18.2853
REMARK  deltaGligsolvnonpol: 6.7318
REMARK  deltaGvdw: -22.4951
REMARK  deltaGelec: 0.0
REMARK  deltaG: -6.039462
REMARK  Cluster: 10
REMARK  ClusterRank: 4
ATOM   9521 C    LIG     1     -30.543  19.049 -52.636  1.00  0.00      LIG  
ATOM   9522 C1   LIG     1     -29.358  19.953 -52.802  1.00  0.00      LIG  
ATOM   9523 O    LIG     1     -29.144  20.887 -52.047  1.00  0.00      LIG  
ATOM   9524 N    LIG     1     -28.587  19.657 -53.905  1.00  0.00      LIG  
ATOM   9525 C2   LIG     1     -27.465  20.493 -54.321  1.00  0.00      LIG  
ATOM   9526 C3   LIG     1     -26.238  20.011 -53.587  1.00  0.00      LIG  
ATOM   9527 O1   LIG     1     -25.106  20.347 -53.905  1.00  0.00      LIG  
ATOM   9528 C4   LIG     1     -27.252  20.591 -55.852  1.00  0.00      LIG  
ATOM   9529 C5   LIG     1     -27.342  19.306 -56.712  1.00  0.00      LIG  
ATOM   9530 C6   LIG     1     -26.171  18.349 -56.492  1.00  0.00      LIG  
ATOM   9531 C7   LIG     1     -26.263  17.095 -57.355  1.00  0.00      LIG  
ATOM   9532 O2   LIG     1     -27.174  16.157 -56.796  1.00  0.00      LIG  
ATOM   9533 O3   LIG     1     -24.954  19.021 -56.805  1.00  0.00      LIG  
ATOM   9534 O4   LIG     1     -28.582  18.623 -56.529  1.00  0.00      LIG  
ATOM   9535 O5   LIG     1     -28.202  21.531 -56.358  1.00  0.00      LIG  
ATOM   9536 H    LIG     1     -31.455  19.628 -52.799  1.00  0.00      LIG  
ATOM   9537 H1   LIG     1     -30.537  18.645 -51.620  1.00  0.00      LIG  
ATOM   9538 H2   LIG     1     -30.518  18.216 -53.347  1.00  0.00      LIG  
ATOM   9539 H3   LIG     1     -28.791  18.814 -54.433  1.00  0.00      LIG  
ATOM   9540 H4   LIG     1     -27.655  21.496 -53.925  1.00  0.00      LIG  
ATOM   9541 H5   LIG     1     -26.416  19.665 -52.556  1.00  0.00      LIG  
ATOM   9542 H6   LIG     1     -26.277  21.053 -56.035  1.00  0.00      LIG  
ATOM   9543 H7   LIG     1     -27.329  19.616 -57.761  1.00  0.00      LIG  
ATOM   9544 H8   LIG     1     -26.147  18.057 -55.443  1.00  0.00      LIG  
ATOM   9545 H9   LIG     1     -25.288  16.606 -57.435  1.00  0.00      LIG  
ATOM   9546 H10  LIG     1     -26.588  17.344 -58.369  1.00  0.00      LIG  
ATOM   9547 H11  LIG     1     -28.005  16.645 -56.645  1.00  0.00      LIG  
ATOM   9548 H12  LIG     1     -24.949  19.175 -57.765  1.00  0.00      LIG  
ATOM   9549 H13  LIG     1     -29.277  19.304 -56.581  1.00  0.00      LIG  
ATOM   9550 H14  LIG     1     -28.013  21.639 -57.306  1.00  0.00      LIG  
TER
REMARK  Energy: 5.02484
REMARK  SimpleFitness: 5.02484
REMARK  FullFitness: -2631.7207
REMARK  InterFull: -22.4951
REMARK  IntraFull: 65.2576
REMARK  solvFull: -3077.36
REMARK  surfFull: 402.877
REMARK  extraFull: 0.0
REMARK  deltaGcompsolvpol: -3077.36
REMARK  deltaGcompsolvnonpol: 402.877
REMARK  deltaGprotsolvpol: -3070.97
REMARK  deltaGprotsolvnonpol: 403.01
REMARK  deltaGligsolvpol: -18.2853
REMARK  deltaGligsolvnonpol: 6.7318
REMARK  deltaGvdw: -22.4951
REMARK  deltaGelec: 0.0
REMARK  deltaG: -6.039462
REMARK  Cluster: 10
REMARK  ClusterRank: 5
ATOM   9521 C    LIG     1     -30.543  19.049 -52.636  1.00  0.00      LIG  
ATOM   9522 C1   LIG     1     -29.358  19.953 -52.802  1.00  0.00      LIG  
ATOM   9523 O    LIG     1     -29.144  20.887 -52.047  1.00  0.00      LIG  
ATOM   9524 N    LIG     1     -28.587  19.657 -53.905  1.00  0.00      LIG  
ATOM   9525 C2   LIG     1     -27.465  20.493 -54.321  1.00  0.00      LIG  
ATOM   9526 C3   LIG     1     -26.238  20.011 -53.587  1.00  0.00      LIG  
ATOM   9527 O1   LIG     1     -25.106  20.347 -53.905  1.00  0.00      LIG  
ATOM   9528 C4   LIG     1     -27.252  20.591 -55.852  1.00  0.00      LIG  
ATOM   9529 C5   LIG     1     -27.342  19.306 -56.712  1.00  0.00      LIG  
ATOM   9530 C6   LIG     1     -26.171  18.349 -56.492  1.00  0.00      LIG  
ATOM   9531 C7   LIG     1     -26.263  17.095 -57.355  1.00  0.00      LIG  
ATOM   9532 O2   LIG     1     -27.174  16.157 -56.796  1.00  0.00      LIG  
ATOM   9533 O3   LIG     1     -24.954  19.021 -56.805  1.00  0.00      LIG  
ATOM   9534 O4   LIG     1     -28.582  18.623 -56.529  1.00  0.00      LIG  
ATOM   9535 O5   LIG     1     -28.202  21.531 -56.358  1.00  0.00      LIG  
ATOM   9536 H    LIG     1     -31.455  19.628 -52.799  1.00  0.00      LIG  
ATOM   9537 H1   LIG     1     -30.537  18.645 -51.620  1.00  0.00      LIG  
ATOM   9538 H2   LIG     1     -30.518  18.216 -53.347  1.00  0.00      LIG  
ATOM   9539 H3   LIG     1     -28.791  18.814 -54.433  1.00  0.00      LIG  
ATOM   9540 H4   LIG     1     -27.655  21.496 -53.925  1.00  0.00      LIG  
ATOM   9541 H5   LIG     1     -26.416  19.665 -52.556  1.00  0.00      LIG  
ATOM   9542 H6   LIG     1     -26.277  21.053 -56.035  1.00  0.00      LIG  
ATOM   9543 H7   LIG     1     -27.329  19.616 -57.761  1.00  0.00      LIG  
ATOM   9544 H8   LIG     1     -26.147  18.057 -55.443  1.00  0.00      LIG  
ATOM   9545 H9   LIG     1     -25.288  16.606 -57.435  1.00  0.00      LIG  
ATOM   9546 H10  LIG     1     -26.588  17.344 -58.369  1.00  0.00      LIG  
ATOM   9547 H11  LIG     1     -28.005  16.645 -56.645  1.00  0.00      LIG  
ATOM   9548 H12  LIG     1     -24.949  19.175 -57.765  1.00  0.00      LIG  
ATOM   9549 H13  LIG     1     -29.277  19.304 -56.581  1.00  0.00      LIG  
ATOM   9550 H14  LIG     1     -28.013  21.639 -57.306  1.00  0.00      LIG  
TER
REMARK  Energy: 5.02484
REMARK  SimpleFitness: 5.02484
REMARK  FullFitness: -2631.7207
REMARK  InterFull: -22.4951
REMARK  IntraFull: 65.2576
REMARK  solvFull: -3077.36
REMARK  surfFull: 402.877
REMARK  extraFull: 0.0
REMARK  deltaGcompsolvpol: -3077.36
REMARK  deltaGcompsolvnonpol: 402.877
REMARK  deltaGprotsolvpol: -3070.97
REMARK  deltaGprotsolvnonpol: 403.01
REMARK  deltaGligsolvpol: -18.2853
REMARK  deltaGligsolvnonpol: 6.7318
REMARK  deltaGvdw: -22.4951
REMARK  deltaGelec: 0.0
REMARK  deltaG: -6.039462
REMARK  Cluster: 10
REMARK  ClusterRank: 6
ATOM   9521 C    LIG     1     -30.543  19.049 -52.636  1.00  0.00      LIG  
ATOM   9522 C1   LIG     1     -29.358  19.953 -52.802  1.00  0.00      LIG  
ATOM   9523 O    LIG     1     -29.144  20.887 -52.047  1.00  0.00      LIG  
ATOM   9524 N    LIG     1     -28.587  19.657 -53.905  1.00  0.00      LIG  
ATOM   9525 C2   LIG     1     -27.465  20.493 -54.321  1.00  0.00      LIG  
ATOM   9526 C3   LIG     1     -26.238  20.011 -53.587  1.00  0.00      LIG  
ATOM   9527 O1   LIG     1     -25.106  20.347 -53.905  1.00  0.00      LIG  
ATOM   9528 C4   LIG     1     -27.252  20.591 -55.852  1.00  0.00      LIG  
ATOM   9529 C5   LIG     1     -27.342  19.306 -56.712  1.00  0.00      LIG  
ATOM   9530 C6   LIG     1     -26.171  18.349 -56.492  1.00  0.00      LIG  
ATOM   9531 C7   LIG     1     -26.263  17.095 -57.355  1.00  0.00      LIG  
ATOM   9532 O2   LIG     1     -27.174  16.157 -56.796  1.00  0.00      LIG  
ATOM   9533 O3   LIG     1     -24.954  19.021 -56.805  1.00  0.00      LIG  
ATOM   9534 O4   LIG     1     -28.582  18.623 -56.529  1.00  0.00      LIG  
ATOM   9535 O5   LIG     1     -28.202  21.531 -56.358  1.00  0.00      LIG  
ATOM   9536 H    LIG     1     -31.455  19.628 -52.799  1.00  0.00      LIG  
ATOM   9537 H1   LIG     1     -30.537  18.645 -51.620  1.00  0.00      LIG  
ATOM   9538 H2   LIG     1     -30.518  18.216 -53.347  1.00  0.00      LIG  
ATOM   9539 H3   LIG     1     -28.791  18.814 -54.433  1.00  0.00      LIG  
ATOM   9540 H4   LIG     1     -27.655  21.496 -53.925  1.00  0.00      LIG  
ATOM   9541 H5   LIG     1     -26.416  19.665 -52.556  1.00  0.00      LIG  
ATOM   9542 H6   LIG     1     -26.277  21.053 -56.035  1.00  0.00      LIG  
ATOM   9543 H7   LIG     1     -27.329  19.616 -57.761  1.00  0.00      LIG  
ATOM   9544 H8   LIG     1     -26.147  18.057 -55.443  1.00  0.00      LIG  
ATOM   9545 H9   LIG     1     -25.288  16.606 -57.435  1.00  0.00      LIG  
ATOM   9546 H10  LIG     1     -26.588  17.344 -58.369  1.00  0.00      LIG  
ATOM   9547 H11  LIG     1     -28.005  16.645 -56.645  1.00  0.00      LIG  
ATOM   9548 H12  LIG     1     -24.949  19.175 -57.765  1.00  0.00      LIG  
ATOM   9549 H13  LIG     1     -29.277  19.304 -56.581  1.00  0.00      LIG  
ATOM   9550 H14  LIG     1     -28.013  21.639 -57.306  1.00  0.00      LIG  
TER
REMARK  Energy: 5.02484
REMARK  SimpleFitness: 5.02484
REMARK  FullFitness: -2631.7207
REMARK  InterFull: -22.4951
REMARK  IntraFull: 65.2576
REMARK  solvFull: -3077.36
REMARK  surfFull: 402.877
REMARK  extraFull: 0.0
REMARK  deltaGcompsolvpol: -3077.36
REMARK  deltaGcompsolvnonpol: 402.877
REMARK  deltaGprotsolvpol: -3070.97
REMARK  deltaGprotsolvnonpol: 403.01
REMARK  deltaGligsolvpol: -18.2853
REMARK  deltaGligsolvnonpol: 6.7318
REMARK  deltaGvdw: -22.4951
REMARK  deltaGelec: 0.0
REMARK  deltaG: -6.039462
REMARK  Cluster: 10
REMARK  ClusterRank: 7
ATOM   9521 C    LIG     1     -30.543  19.049 -52.636  1.00  0.00      LIG  
ATOM   9522 C1   LIG     1     -29.358  19.953 -52.802  1.00  0.00      LIG  
ATOM   9523 O    LIG     1     -29.144  20.887 -52.047  1.00  0.00      LIG  
ATOM   9524 N    LIG     1     -28.587  19.657 -53.905  1.00  0.00      LIG  
ATOM   9525 C2   LIG     1     -27.465  20.493 -54.321  1.00  0.00      LIG  
ATOM   9526 C3   LIG     1     -26.238  20.011 -53.587  1.00  0.00      LIG  
ATOM   9527 O1   LIG     1     -25.106  20.347 -53.905  1.00  0.00      LIG  
ATOM   9528 C4   LIG     1     -27.252  20.591 -55.852  1.00  0.00      LIG  
ATOM   9529 C5   LIG     1     -27.342  19.306 -56.712  1.00  0.00      LIG  
ATOM   9530 C6   LIG     1     -26.171  18.349 -56.492  1.00  0.00      LIG  
ATOM   9531 C7   LIG     1     -26.263  17.095 -57.355  1.00  0.00      LIG  
ATOM   9532 O2   LIG     1     -27.174  16.157 -56.796  1.00  0.00      LIG  
ATOM   9533 O3   LIG     1     -24.954  19.021 -56.805  1.00  0.00      LIG  
ATOM   9534 O4   LIG     1     -28.582  18.623 -56.529  1.00  0.00      LIG  
ATOM   9535 O5   LIG     1     -28.202  21.531 -56.358  1.00  0.00      LIG  
ATOM   9536 H    LIG     1     -31.455  19.628 -52.799  1.00  0.00      LIG  
ATOM   9537 H1   LIG     1     -30.537  18.645 -51.620  1.00  0.00      LIG  
ATOM   9538 H2   LIG     1     -30.518  18.216 -53.347  1.00  0.00      LIG  
ATOM   9539 H3   LIG     1     -28.791  18.814 -54.433  1.00  0.00      LIG  
ATOM   9540 H4   LIG     1     -27.655  21.496 -53.925  1.00  0.00      LIG  
ATOM   9541 H5   LIG     1     -26.416  19.665 -52.556  1.00  0.00      LIG  
ATOM   9542 H6   LIG     1     -26.277  21.053 -56.035  1.00  0.00      LIG  
ATOM   9543 H7   LIG     1     -27.329  19.616 -57.761  1.00  0.00      LIG  
ATOM   9544 H8   LIG     1     -26.147  18.057 -55.443  1.00  0.00      LIG  
ATOM   9545 H9   LIG     1     -25.288  16.606 -57.435  1.00  0.00      LIG  
ATOM   9546 H10  LIG     1     -26.588  17.344 -58.369  1.00  0.00      LIG  
ATOM   9547 H11  LIG     1     -28.005  16.645 -56.645  1.00  0.00      LIG  
ATOM   9548 H12  LIG     1     -24.949  19.175 -57.765  1.00  0.00      LIG  
ATOM   9549 H13  LIG     1     -29.277  19.304 -56.581  1.00  0.00      LIG  
ATOM   9550 H14  LIG     1     -28.013  21.639 -57.306  1.00  0.00      LIG  
TER
REMARK  Energy: 0.14169
REMARK  SimpleFitness: 0.14169
REMARK  FullFitness: -2632.6892
REMARK  InterFull: -48.3704
REMARK  IntraFull: 69.6642
REMARK  solvFull: -3055.92
REMARK  surfFull: 401.937
REMARK  extraFull: 0.0
REMARK  deltaGcompsolvpol: -3055.92
REMARK  deltaGcompsolvnonpol: 401.937
REMARK  deltaGprotsolvpol: -3070.97
REMARK  deltaGprotsolvnonpol: 403.01
REMARK  deltaGligsolvpol: -20.1265
REMARK  deltaGligsolvnonpol: 6.63268
REMARK  deltaGvdw: -48.3704
REMARK  deltaGelec: 0.0
REMARK  deltaG: -7.141992
REMARK  Cluster: 11
REMARK  ClusterRank: 0
ATOM   9521 C    LIG     1     -16.844   3.493 -23.225  1.00  0.00      LIG  
ATOM   9522 C1   LIG     1     -17.557   4.811 -23.159  1.00  0.00      LIG  
ATOM   9523 O    LIG     1     -18.260   5.122 -22.210  1.00  0.00      LIG  
ATOM   9524 N    LIG     1     -17.296   5.612 -24.248  1.00  0.00      LIG  
ATOM   9525 C2   LIG     1     -17.772   6.987 -24.352  1.00  0.00      LIG  
ATOM   9526 C3   LIG     1     -16.575   7.840 -23.990  1.00  0.00      LIG  
ATOM   9527 O1   LIG     1     -15.415   7.488 -24.138  1.00  0.00      LIG  
ATOM   9528 C4   LIG     1     -18.346   7.269 -25.757  1.00  0.00      LIG  
ATOM   9529 C5   LIG     1     -19.143   8.581 -25.887  1.00  0.00      LIG  
ATOM   9530 C6   LIG     1     -20.461   8.557 -25.120  1.00  0.00      LIG  
ATOM   9531 C7   LIG     1     -21.288   9.791 -25.469  1.00  0.00      LIG  
ATOM   9532 O2   LIG     1     -22.348   9.944 -24.532  1.00  0.00      LIG  
ATOM   9533 O3   LIG     1     -21.204   7.393 -25.474  1.00  0.00      LIG  
ATOM   9534 O4   LIG     1     -18.387   9.719 -25.469  1.00  0.00      LIG  
ATOM   9535 O5   LIG     1     -17.329   7.240 -26.766  1.00  0.00      LIG  
ATOM   9536 H    LIG     1     -17.580   2.689 -23.143  1.00  0.00      LIG  
ATOM   9537 H1   LIG     1     -16.137   3.435 -22.393  1.00  0.00      LIG  
ATOM   9538 H2   LIG     1     -16.294   3.373 -24.164  1.00  0.00      LIG  
ATOM   9539 H3   LIG     1     -16.597   5.293 -24.913  1.00  0.00      LIG  
ATOM   9540 H4   LIG     1     -18.536   7.154 -23.587  1.00  0.00      LIG  
ATOM   9541 H5   LIG     1     -16.789   8.879 -23.714  1.00  0.00      LIG  
ATOM   9542 H6   LIG     1     -19.014   6.443 -26.017  1.00  0.00      LIG  
ATOM   9543 H7   LIG     1     -19.361   8.738 -26.945  1.00  0.00      LIG  
ATOM   9544 H8   LIG     1     -20.283   8.522 -24.042  1.00  0.00      LIG  
ATOM   9545 H9   LIG     1     -21.732   9.696 -26.465  1.00  0.00      LIG  
ATOM   9546 H10  LIG     1     -20.690  10.705 -25.436  1.00  0.00      LIG  
ATOM   9547 H11  LIG     1     -21.922  10.122 -23.670  1.00  0.00      LIG  
ATOM   9548 H12  LIG     1     -22.088   7.507 -25.084  1.00  0.00      LIG  
ATOM   9549 H13  LIG     1     -18.454   9.764 -24.494  1.00  0.00      LIG  
ATOM   9550 H14  LIG     1     -16.785   6.449 -26.607  1.00  0.00      LIG  
TER
REMARK  Energy: 0.94514
REMARK  SimpleFitness: 0.94514
REMARK  FullFitness: -2632.4507
REMARK  InterFull: -31.5576
REMARK  IntraFull: 65.4222
REMARK  solvFull: -3069.05
REMARK  surfFull: 402.735
REMARK  extraFull: 0.0
REMARK  deltaGcompsolvpol: -3069.05
REMARK  deltaGcompsolvnonpol: 402.735
REMARK  deltaGprotsolvpol: -3070.97
REMARK  deltaGprotsolvnonpol: 403.01
REMARK  deltaGligsolvpol: -18.2304
REMARK  deltaGligsolvnonpol: 6.60213
REMARK  deltaGvdw: -31.5576
REMARK  deltaGelec: 0.0
REMARK  deltaG: -6.392728
REMARK  Cluster: 12
REMARK  ClusterRank: 0
ATOM   9521 C    LIG     1     -25.702  19.324 -56.876  1.00  0.00      LIG  
ATOM   9522 C1   LIG     1     -26.757  18.843 -55.921  1.00  0.00      LIG  
ATOM   9523 O    LIG     1     -27.430  17.846 -56.139  1.00  0.00      LIG  
ATOM   9524 N    LIG     1     -26.877  19.646 -54.815  1.00  0.00      LIG  
ATOM   9525 C2   LIG     1     -27.878  19.428 -53.779  1.00  0.00      LIG  
ATOM   9526 C3   LIG     1     -27.241  19.918 -52.496  1.00  0.00      LIG  
ATOM   9527 O1   LIG     1     -26.052  20.170 -52.375  1.00  0.00      LIG  
ATOM   9528 C4   LIG     1     -29.208  20.143 -54.092  1.00  0.00      LIG  
ATOM   9529 C5   LIG     1     -30.279  19.901 -53.020  1.00  0.00      LIG  
ATOM   9530 C6   LIG     1     -31.574  20.667 -53.324  1.00  0.00      LIG  
ATOM   9531 C7   LIG     1     -32.485  19.912 -54.289  1.00  0.00      LIG  
ATOM   9532 O2   LIG     1     -33.547  20.760 -54.713  1.00  0.00      LIG  
ATOM   9533 O3   LIG     1     -32.277  20.869 -52.099  1.00  0.00      LIG  
ATOM   9534 O4   LIG     1     -30.572  18.507 -52.924  1.00  0.00      LIG  
ATOM   9535 O5   LIG     1     -29.001  21.552 -54.238  1.00  0.00      LIG  
ATOM   9536 H    LIG     1     -26.182  19.623 -57.811  1.00  0.00      LIG  
ATOM   9537 H1   LIG     1     -24.995  18.512 -57.064  1.00  0.00      LIG  
ATOM   9538 H2   LIG     1     -25.151  20.182 -56.473  1.00  0.00      LIG  
ATOM   9539 H3   LIG     1     -26.291  20.472 -54.745  1.00  0.00      LIG  
ATOM   9540 H4   LIG     1     -28.050  18.353 -53.678  1.00  0.00      LIG  
ATOM   9541 H5   LIG     1     -27.872  19.848 -51.600  1.00  0.00      LIG  
ATOM   9542 H6   LIG     1     -29.567  19.770 -55.055  1.00  0.00      LIG  
ATOM   9543 H7   LIG     1     -29.908  20.226 -52.044  1.00  0.00      LIG  
ATOM   9544 H8   LIG     1     -31.364  21.668 -53.705  1.00  0.00      LIG  
ATOM   9545 H9   LIG     1     -32.937  19.037 -53.812  1.00  0.00      LIG  
ATOM   9546 H10  LIG     1     -31.935  19.591 -55.177  1.00  0.00      LIG  
ATOM   9547 H11  LIG     1     -33.913  21.158 -53.904  1.00  0.00      LIG  
ATOM   9548 H12  LIG     1     -32.680  20.020 -51.850  1.00  0.00      LIG  
ATOM   9549 H13  LIG     1     -29.760  18.034 -52.660  1.00  0.00      LIG  
ATOM   9550 H14  LIG     1     -29.857  21.942 -54.485  1.00  0.00      LIG  
TER
REMARK  Energy: 2.70884
REMARK  SimpleFitness: 2.70884
REMARK  FullFitness: -2632.125
REMARK  InterFull: -30.0349
REMARK  IntraFull: 65.07
REMARK  solvFull: -3069.87
REMARK  surfFull: 402.71
REMARK  extraFull: 0.0
REMARK  deltaGcompsolvpol: -3069.87
REMARK  deltaGcompsolvnonpol: 402.71
REMARK  deltaGprotsolvpol: -3070.97
REMARK  deltaGprotsolvnonpol: 403.01
REMARK  deltaGligsolvpol: -17.8428
REMARK  deltaGligsolvnonpol: 6.6231
REMARK  deltaGvdw: -30.0349
REMARK  deltaGelec: 0.0
REMARK  deltaG: -6.326938
REMARK  Cluster: 12
REMARK  ClusterRank: 1
ATOM   9521 C    LIG     1     -27.273  18.353 -58.114  1.00  0.00      LIG  
ATOM   9522 C1   LIG     1     -28.112  18.294 -56.872  1.00  0.00      LIG  
ATOM   9523 O    LIG     1     -29.130  17.622 -56.817  1.00  0.00      LIG  
ATOM   9524 N    LIG     1     -27.589  19.025 -55.831  1.00  0.00      LIG  
ATOM   9525 C2   LIG     1     -28.190  19.030 -54.507  1.00  0.00      LIG  
ATOM   9526 C3   LIG     1     -27.127  19.565 -53.566  1.00  0.00      LIG  
ATOM   9527 O1   LIG     1     -25.950  19.709 -53.870  1.00  0.00      LIG  
ATOM   9528 C4   LIG     1     -29.503  19.834 -54.436  1.00  0.00      LIG  
ATOM   9529 C5   LIG     1     -30.256  19.520 -53.140  1.00  0.00      LIG  
ATOM   9530 C6   LIG     1     -31.417  20.480 -52.877  1.00  0.00      LIG  
ATOM   9531 C7   LIG     1     -32.589  20.246 -53.824  1.00  0.00      LIG  
ATOM   9532 O2   LIG     1     -33.524  21.312 -53.698  1.00  0.00      LIG  
ATOM   9533 O3   LIG     1     -31.847  20.301 -51.526  1.00  0.00      LIG  
ATOM   9534 O4   LIG     1     -30.757  18.185 -53.207  1.00  0.00      LIG  
ATOM   9535 O5   LIG     1     -29.263  21.241 -54.557  1.00  0.00      LIG  
ATOM   9536 H    LIG     1     -27.906  18.647 -58.954  1.00  0.00      LIG  
ATOM   9537 H1   LIG     1     -26.850  17.362 -58.298  1.00  0.00      LIG  
ATOM   9538 H2   LIG     1     -26.456  19.076 -58.017  1.00  0.00      LIG  
ATOM   9539 H3   LIG     1     -26.733  19.551 -55.974  1.00  0.00      LIG  
ATOM   9540 H4   LIG     1     -28.389  17.990 -54.235  1.00  0.00      LIG  
ATOM   9541 H5   LIG     1     -27.434  19.659 -52.514  1.00  0.00      LIG  
ATOM   9542 H6   LIG     1     -30.127  19.546 -55.286  1.00  0.00      LIG  
ATOM   9543 H7   LIG     1     -29.574  19.566 -52.286  1.00  0.00      LIG  
ATOM   9544 H8   LIG     1     -31.081  21.518 -52.942  1.00  0.00      LIG  
ATOM   9545 H9   LIG     1     -33.114  19.315 -53.592  1.00  0.00      LIG  
ATOM   9546 H10  LIG     1     -32.260  20.216 -54.865  1.00  0.00      LIG  
ATOM   9547 H11  LIG     1     -33.706  21.403 -52.746  1.00  0.00      LIG  
ATOM   9548 H12  LIG     1     -32.636  19.726 -51.547  1.00  0.00      LIG  
ATOM   9549 H13  LIG     1     -30.028  17.588 -52.945  1.00  0.00      LIG  
ATOM   9550 H14  LIG     1     -30.132  21.677 -54.568  1.00  0.00      LIG  
TER
REMARK  Energy: 2.91197
REMARK  SimpleFitness: 2.91197
REMARK  FullFitness: -2631.962
REMARK  InterFull: -29.6231
REMARK  IntraFull: 64.9599
REMARK  solvFull: -3070.13
REMARK  surfFull: 402.831
REMARK  extraFull: 0.0
REMARK  deltaGcompsolvpol: -3070.13
REMARK  deltaGcompsolvnonpol: 402.831
REMARK  deltaGprotsolvpol: -3070.97
REMARK  deltaGprotsolvnonpol: 403.01
REMARK  deltaGligsolvpol: -18.0125
REMARK  deltaGligsolvnonpol: 6.65372
REMARK  deltaGvdw: -29.6231
REMARK  deltaGelec: 0.0
REMARK  deltaG: -6.2849436
REMARK  Cluster: 12
REMARK  ClusterRank: 2
ATOM   9521 C    LIG     1     -27.517  18.664 -58.287  1.00  0.00      LIG  
ATOM   9522 C1   LIG     1     -28.246  18.437 -56.997  1.00  0.00      LIG  
ATOM   9523 O    LIG     1     -29.224  17.713 -56.925  1.00  0.00      LIG  
ATOM   9524 N    LIG     1     -27.675  19.097 -55.933  1.00  0.00      LIG  
ATOM   9525 C2   LIG     1     -28.240  19.022 -54.597  1.00  0.00      LIG  
ATOM   9526 C3   LIG     1     -27.143  19.460 -53.646  1.00  0.00      LIG  
ATOM   9527 O1   LIG     1     -25.988  19.684 -53.978  1.00  0.00      LIG  
ATOM   9528 C4   LIG     1     -29.523  19.861 -54.446  1.00  0.00      LIG  
ATOM   9529 C5   LIG     1     -30.242  19.522 -53.139  1.00  0.00      LIG  
ATOM   9530 C6   LIG     1     -31.409  20.467 -52.854  1.00  0.00      LIG  
ATOM   9531 C7   LIG     1     -32.587  20.225 -53.794  1.00  0.00      LIG  
ATOM   9532 O2   LIG     1     -33.550  21.260 -53.631  1.00  0.00      LIG  
ATOM   9533 O3   LIG     1     -31.820  20.268 -51.499  1.00  0.00      LIG  
ATOM   9534 O4   LIG     1     -30.734  18.183 -53.206  1.00  0.00      LIG  
ATOM   9535 O5   LIG     1     -29.239  21.264 -54.504  1.00  0.00      LIG  
ATOM   9536 H    LIG     1     -28.251  18.909 -59.059  1.00  0.00      LIG  
ATOM   9537 H1   LIG     1     -26.981  17.750 -58.559  1.00  0.00      LIG  
ATOM   9538 H2   LIG     1     -26.804  19.491 -58.209  1.00  0.00      LIG  
ATOM   9539 H3   LIG     1     -26.850  19.671 -56.081  1.00  0.00      LIG  
ATOM   9540 H4   LIG     1     -28.462  17.971 -54.396  1.00  0.00      LIG  
ATOM   9541 H5   LIG     1     -27.412  19.434 -52.578  1.00  0.00      LIG  
ATOM   9542 H6   LIG     1     -30.183  19.637 -55.290  1.00  0.00      LIG  
ATOM   9543 H7   LIG     1     -29.543  19.578 -52.300  1.00  0.00      LIG  
ATOM   9544 H8   LIG     1     -31.088  21.509 -52.916  1.00  0.00      LIG  
ATOM   9545 H9   LIG     1     -33.082  19.273 -53.582  1.00  0.00      LIG  
ATOM   9546 H10  LIG     1     -32.270  20.231 -54.839  1.00  0.00      LIG  
ATOM   9547 H11  LIG     1     -33.733  21.311 -52.677  1.00  0.00      LIG  
ATOM   9548 H12  LIG     1     -32.554  19.627 -51.512  1.00  0.00      LIG  
ATOM   9549 H13  LIG     1     -30.030  17.593 -52.870  1.00  0.00      LIG  
ATOM   9550 H14  LIG     1     -30.084  21.730 -54.388  1.00  0.00      LIG  
TER
REMARK  Energy: 2.91197
REMARK  SimpleFitness: 2.91197
REMARK  FullFitness: -2631.962
REMARK  InterFull: -29.6231
REMARK  IntraFull: 64.9599
REMARK  solvFull: -3070.13
REMARK  surfFull: 402.831
REMARK  extraFull: 0.0
REMARK  deltaGcompsolvpol: -3070.13
REMARK  deltaGcompsolvnonpol: 402.831
REMARK  deltaGprotsolvpol: -3070.97
REMARK  deltaGprotsolvnonpol: 403.01
REMARK  deltaGligsolvpol: -18.0125
REMARK  deltaGligsolvnonpol: 6.65372
REMARK  deltaGvdw: -29.6231
REMARK  deltaGelec: 0.0
REMARK  deltaG: -6.2849436
REMARK  Cluster: 12
REMARK  ClusterRank: 3
ATOM   9521 C    LIG     1     -27.517  18.664 -58.287  1.00  0.00      LIG  
ATOM   9522 C1   LIG     1     -28.246  18.437 -56.997  1.00  0.00      LIG  
ATOM   9523 O    LIG     1     -29.224  17.713 -56.925  1.00  0.00      LIG  
ATOM   9524 N    LIG     1     -27.675  19.097 -55.933  1.00  0.00      LIG  
ATOM   9525 C2   LIG     1     -28.240  19.022 -54.597  1.00  0.00      LIG  
ATOM   9526 C3   LIG     1     -27.143  19.460 -53.646  1.00  0.00      LIG  
ATOM   9527 O1   LIG     1     -25.988  19.684 -53.978  1.00  0.00      LIG  
ATOM   9528 C4   LIG     1     -29.523  19.861 -54.446  1.00  0.00      LIG  
ATOM   9529 C5   LIG     1     -30.242  19.522 -53.139  1.00  0.00      LIG  
ATOM   9530 C6   LIG     1     -31.409  20.467 -52.854  1.00  0.00      LIG  
ATOM   9531 C7   LIG     1     -32.587  20.225 -53.794  1.00  0.00      LIG  
ATOM   9532 O2   LIG     1     -33.550  21.260 -53.631  1.00  0.00      LIG  
ATOM   9533 O3   LIG     1     -31.820  20.268 -51.499  1.00  0.00      LIG  
ATOM   9534 O4   LIG     1     -30.734  18.183 -53.206  1.00  0.00      LIG  
ATOM   9535 O5   LIG     1     -29.239  21.264 -54.504  1.00  0.00      LIG  
ATOM   9536 H    LIG     1     -28.251  18.909 -59.059  1.00  0.00      LIG  
ATOM   9537 H1   LIG     1     -26.981  17.750 -58.559  1.00  0.00      LIG  
ATOM   9538 H2   LIG     1     -26.804  19.491 -58.209  1.00  0.00      LIG  
ATOM   9539 H3   LIG     1     -26.850  19.671 -56.081  1.00  0.00      LIG  
ATOM   9540 H4   LIG     1     -28.462  17.971 -54.396  1.00  0.00      LIG  
ATOM   9541 H5   LIG     1     -27.412  19.434 -52.578  1.00  0.00      LIG  
ATOM   9542 H6   LIG     1     -30.183  19.637 -55.290  1.00  0.00      LIG  
ATOM   9543 H7   LIG     1     -29.543  19.578 -52.300  1.00  0.00      LIG  
ATOM   9544 H8   LIG     1     -31.088  21.509 -52.916  1.00  0.00      LIG  
ATOM   9545 H9   LIG     1     -33.082  19.273 -53.582  1.00  0.00      LIG  
ATOM   9546 H10  LIG     1     -32.270  20.231 -54.839  1.00  0.00      LIG  
ATOM   9547 H11  LIG     1     -33.733  21.311 -52.677  1.00  0.00      LIG  
ATOM   9548 H12  LIG     1     -32.554  19.627 -51.512  1.00  0.00      LIG  
ATOM   9549 H13  LIG     1     -30.030  17.593 -52.870  1.00  0.00      LIG  
ATOM   9550 H14  LIG     1     -30.084  21.730 -54.388  1.00  0.00      LIG  
TER
REMARK  Energy: 9.31563
REMARK  SimpleFitness: 9.31563
REMARK  FullFitness: -2628.6636
REMARK  InterFull: -35.0183
REMARK  IntraFull: 74.848
REMARK  solvFull: -3071.53
REMARK  surfFull: 403.037
REMARK  extraFull: 0.0
REMARK  deltaGcompsolvpol: -3071.53
REMARK  deltaGcompsolvnonpol: 403.037
REMARK  deltaGprotsolvpol: -3070.97
REMARK  deltaGprotsolvnonpol: 403.01
REMARK  deltaGligsolvpol: -19.5971
REMARK  deltaGligsolvnonpol: 6.70139
REMARK  deltaGvdw: -35.0183
REMARK  deltaGelec: 0.0
REMARK  deltaG: -6.7690635
REMARK  Cluster: 12
REMARK  ClusterRank: 4
ATOM   9521 C    LIG     1     -26.994  17.779 -56.630  1.00  0.00      LIG  
ATOM   9522 C1   LIG     1     -27.057  19.256 -56.881  1.00  0.00      LIG  
ATOM   9523 O    LIG     1     -26.967  19.704 -58.013  1.00  0.00      LIG  
ATOM   9524 N    LIG     1     -27.224  20.068 -55.775  1.00  0.00      LIG  
ATOM   9525 C2   LIG     1     -27.264  19.671 -54.367  1.00  0.00      LIG  
ATOM   9526 C3   LIG     1     -25.950  20.187 -53.804  1.00  0.00      LIG  
ATOM   9527 O1   LIG     1     -24.906  20.236 -54.441  1.00  0.00      LIG  
ATOM   9528 C4   LIG     1     -28.516  20.235 -53.651  1.00  0.00      LIG  
ATOM   9529 C5   LIG     1     -29.752  19.349 -53.925  1.00  0.00      LIG  
ATOM   9530 C6   LIG     1     -31.049  19.790 -53.223  1.00  0.00      LIG  
ATOM   9531 C7   LIG     1     -31.202  19.217 -51.822  1.00  0.00      LIG  
ATOM   9532 O2   LIG     1     -31.391  17.810 -51.873  1.00  0.00      LIG  
ATOM   9533 O3   LIG     1     -31.117  21.211 -53.153  1.00  0.00      LIG  
ATOM   9534 O4   LIG     1     -30.017  19.326 -55.326  1.00  0.00      LIG  
ATOM   9535 O5   LIG     1     -28.312  20.310 -52.238  1.00  0.00      LIG  
ATOM   9536 H    LIG     1     -26.971  17.261 -57.592  1.00  0.00      LIG  
ATOM   9537 H1   LIG     1     -27.878  17.451 -56.075  1.00  0.00      LIG  
ATOM   9538 H2   LIG     1     -26.084  17.542 -56.075  1.00  0.00      LIG  
ATOM   9539 H3   LIG     1     -27.236  21.064 -55.969  1.00  0.00      LIG  
ATOM   9540 H4   LIG     1     -27.247  18.588 -54.238  1.00  0.00      LIG  
ATOM   9541 H5   LIG     1     -25.895  20.217 -52.705  1.00  0.00      LIG  
ATOM   9542 H6   LIG     1     -28.693  21.255 -54.008  1.00  0.00      LIG  
ATOM   9543 H7   LIG     1     -29.529  18.320 -53.636  1.00  0.00      LIG  
ATOM   9544 H8   LIG     1     -31.907  19.461 -53.819  1.00  0.00      LIG  
ATOM   9545 H9   LIG     1     -32.057  19.668 -51.316  1.00  0.00      LIG  
ATOM   9546 H10  LIG     1     -30.338  19.431 -51.198  1.00  0.00      LIG  
ATOM   9547 H11  LIG     1     -30.512  17.409 -52.022  1.00  0.00      LIG  
ATOM   9548 H12  LIG     1     -31.963  21.428 -52.724  1.00  0.00      LIG  
ATOM   9549 H13  LIG     1     -30.836  18.816 -55.448  1.00  0.00      LIG  
ATOM   9550 H14  LIG     1     -29.079  20.786 -51.875  1.00  0.00      LIG  
TER
REMARK  Energy: 7.59257
REMARK  SimpleFitness: 7.59257
REMARK  FullFitness: -2625.8252
REMARK  InterFull: -28.2887
REMARK  IntraFull: 68.9655
REMARK  solvFull: -3069.32
REMARK  surfFull: 402.818
REMARK  extraFull: 0.0
REMARK  deltaGcompsolvpol: -3069.32
REMARK  deltaGcompsolvnonpol: 402.818
REMARK  deltaGprotsolvpol: -3070.97
REMARK  deltaGprotsolvnonpol: 403.01
REMARK  deltaGligsolvpol: -16.5897
REMARK  deltaGligsolvnonpol: 6.64545
REMARK  deltaGvdw: -28.2887
REMARK  deltaGelec: 0.0
REMARK  deltaG: -6.1966715
REMARK  Cluster: 12
REMARK  ClusterRank: 5
ATOM   9521 C    LIG     1     -26.380  19.720 -57.061  1.00  0.00      LIG  
ATOM   9522 C1   LIG     1     -27.086  19.106 -55.889  1.00  0.00      LIG  
ATOM   9523 O    LIG     1     -27.505  17.959 -55.911  1.00  0.00      LIG  
ATOM   9524 N    LIG     1     -27.282  20.000 -54.861  1.00  0.00      LIG  
ATOM   9525 C2   LIG     1     -27.887  19.605 -53.597  1.00  0.00      LIG  
ATOM   9526 C3   LIG     1     -26.894  20.056 -52.551  1.00  0.00      LIG  
ATOM   9527 O1   LIG     1     -25.711  20.272 -52.778  1.00  0.00      LIG  
ATOM   9528 C4   LIG     1     -29.266  20.233 -53.300  1.00  0.00      LIG  
ATOM   9529 C5   LIG     1     -30.227  20.183 -54.512  1.00  0.00      LIG  
ATOM   9530 C6   LIG     1     -31.721  20.461 -54.248  1.00  0.00      LIG  
ATOM   9531 C7   LIG     1     -32.563  19.191 -54.182  1.00  0.00      LIG  
ATOM   9532 O2   LIG     1     -32.054  18.263 -53.237  1.00  0.00      LIG  
ATOM   9533 O3   LIG     1     -31.917  21.251 -53.076  1.00  0.00      LIG  
ATOM   9534 O4   LIG     1     -29.804  21.177 -55.445  1.00  0.00      LIG  
ATOM   9535 O5   LIG     1     -29.805  19.518 -52.186  1.00  0.00      LIG  
ATOM   9536 H    LIG     1     -27.123  20.072 -57.781  1.00  0.00      LIG  
ATOM   9537 H1   LIG     1     -25.743  18.962 -57.523  1.00  0.00      LIG  
ATOM   9538 H2   LIG     1     -25.751  20.559 -56.747  1.00  0.00      LIG  
ATOM   9539 H3   LIG     1     -26.835  20.910 -54.919  1.00  0.00      LIG  
ATOM   9540 H4   LIG     1     -27.949  18.514 -53.532  1.00  0.00      LIG  
ATOM   9541 H5   LIG     1     -27.246  19.973 -51.512  1.00  0.00      LIG  
ATOM   9542 H6   LIG     1     -29.140  21.276 -52.990  1.00  0.00      LIG  
ATOM   9543 H7   LIG     1     -30.139  19.217 -55.018  1.00  0.00      LIG  
ATOM   9544 H8   LIG     1     -32.142  21.055 -55.066  1.00  0.00      LIG  
ATOM   9545 H9   LIG     1     -32.576  18.695 -55.156  1.00  0.00      LIG  
ATOM   9546 H10  LIG     1     -33.592  19.424 -53.894  1.00  0.00      LIG  
ATOM   9547 H11  LIG     1     -31.841  18.789 -52.445  1.00  0.00      LIG  
ATOM   9548 H12  LIG     1     -31.336  22.025 -53.164  1.00  0.00      LIG  
ATOM   9549 H13  LIG     1     -28.863  21.000 -55.620  1.00  0.00      LIG  
ATOM   9550 H14  LIG     1     -29.772  18.569 -52.409  1.00  0.00      LIG  
TER
REMARK  Energy: 7.80197
REMARK  SimpleFitness: 7.80197
REMARK  FullFitness: -2625.6929
REMARK  InterFull: -32.0523
REMARK  IntraFull: 72.4596
REMARK  solvFull: -3068.72
REMARK  surfFull: 402.62
REMARK  extraFull: 0.0
REMARK  deltaGcompsolvpol: -3068.72
REMARK  deltaGcompsolvnonpol: 402.62
REMARK  deltaGprotsolvpol: -3070.97
REMARK  deltaGprotsolvnonpol: 403.01
REMARK  deltaGligsolvpol: -17.2266
REMARK  deltaGligsolvnonpol: 6.62947
REMARK  deltaGvdw: -32.0523
REMARK  deltaGelec: 0.0
REMARK  deltaG: -6.494223
REMARK  Cluster: 12
REMARK  ClusterRank: 6
ATOM   9521 C    LIG     1     -25.378  19.101 -56.783  1.00  0.00      LIG  
ATOM   9522 C1   LIG     1     -26.576  18.690 -55.981  1.00  0.00      LIG  
ATOM   9523 O    LIG     1     -27.193  17.662 -56.211  1.00  0.00      LIG  
ATOM   9524 N    LIG     1     -26.818  19.536 -54.925  1.00  0.00      LIG  
ATOM   9525 C2   LIG     1     -27.916  19.309 -53.997  1.00  0.00      LIG  
ATOM   9526 C3   LIG     1     -27.513  20.014 -52.719  1.00  0.00      LIG  
ATOM   9527 O1   LIG     1     -26.349  20.168 -52.373  1.00  0.00      LIG  
ATOM   9528 C4   LIG     1     -29.269  19.733 -54.604  1.00  0.00      LIG  
ATOM   9529 C5   LIG     1     -30.447  18.962 -53.978  1.00  0.00      LIG  
ATOM   9530 C6   LIG     1     -31.055  19.549 -52.683  1.00  0.00      LIG  
ATOM   9531 C7   LIG     1     -31.953  20.791 -52.789  1.00  0.00      LIG  
ATOM   9532 O2   LIG     1     -33.043  20.639 -53.690  1.00  0.00      LIG  
ATOM   9533 O3   LIG     1     -31.795  18.516 -52.031  1.00  0.00      LIG  
ATOM   9534 O4   LIG     1     -31.448  18.779 -54.980  1.00  0.00      LIG  
ATOM   9535 O5   LIG     1     -29.461  21.149 -54.570  1.00  0.00      LIG  
ATOM   9536 H    LIG     1     -25.488  18.717 -57.800  1.00  0.00      LIG  
ATOM   9537 H1   LIG     1     -24.478  18.683 -56.324  1.00  0.00      LIG  
ATOM   9538 H2   LIG     1     -25.297  20.192 -56.828  1.00  0.00      LIG  
ATOM   9539 H3   LIG     1     -26.244  20.365 -54.810  1.00  0.00      LIG  
ATOM   9540 H4   LIG     1     -27.960  18.239 -53.786  1.00  0.00      LIG  
ATOM   9541 H5   LIG     1     -28.308  20.141 -51.975  1.00  0.00      LIG  
ATOM   9542 H6   LIG     1     -29.245  19.481 -55.669  1.00  0.00      LIG  
ATOM   9543 H7   LIG     1     -30.096  17.950 -53.763  1.00  0.00      LIG  
ATOM   9544 H8   LIG     1     -30.249  19.792 -51.993  1.00  0.00      LIG  
ATOM   9545 H9   LIG     1     -31.382  21.667 -53.101  1.00  0.00      LIG  
ATOM   9546 H10  LIG     1     -32.387  21.010 -51.808  1.00  0.00      LIG  
ATOM   9547 H11  LIG     1     -33.328  19.711 -53.617  1.00  0.00      LIG  
ATOM   9548 H12  LIG     1     -32.452  18.958 -51.464  1.00  0.00      LIG  
ATOM   9549 H13  LIG     1     -31.011  18.356 -55.738  1.00  0.00      LIG  
ATOM   9550 H14  LIG     1     -30.349  21.316 -54.932  1.00  0.00      LIG  
TER
REMARK  Energy: 8.51059
REMARK  SimpleFitness: 8.51059
REMARK  FullFitness: -2625.171
REMARK  InterFull: -26.6305
REMARK  IntraFull: 71.0817
REMARK  solvFull: -3072.69
REMARK  surfFull: 403.068
REMARK  extraFull: 0.0
REMARK  deltaGcompsolvpol: -3072.69
REMARK  deltaGcompsolvnonpol: 403.068
REMARK  deltaGprotsolvpol: -3070.97
REMARK  deltaGprotsolvnonpol: 403.01
REMARK  deltaGligsolvpol: -18.5219
REMARK  deltaGligsolvnonpol: 6.82544
REMARK  deltaGvdw: -26.6305
REMARK  deltaGelec: 0.0
REMARK  deltaG: -6.1211686
REMARK  Cluster: 12
REMARK  ClusterRank: 7
ATOM   9521 C    LIG     1     -27.824  18.214 -56.265  1.00  0.00      LIG  
ATOM   9522 C1   LIG     1     -27.530  19.678 -56.145  1.00  0.00      LIG  
ATOM   9523 O    LIG     1     -27.078  20.309 -57.087  1.00  0.00      LIG  
ATOM   9524 N    LIG     1     -27.839  20.277 -54.938  1.00  0.00      LIG  
ATOM   9525 C2   LIG     1     -28.280  19.623 -53.707  1.00  0.00      LIG  
ATOM   9526 C3   LIG     1     -27.198  19.970 -52.702  1.00  0.00      LIG  
ATOM   9527 O1   LIG     1     -26.027  20.172 -52.996  1.00  0.00      LIG  
ATOM   9528 C4   LIG     1     -29.658  20.123 -53.222  1.00  0.00      LIG  
ATOM   9529 C5   LIG     1     -30.785  19.802 -54.218  1.00  0.00      LIG  
ATOM   9530 C6   LIG     1     -32.179  20.042 -53.623  1.00  0.00      LIG  
ATOM   9531 C7   LIG     1     -32.509  21.531 -53.542  1.00  0.00      LIG  
ATOM   9532 O2   LIG     1     -33.581  21.749 -52.633  1.00  0.00      LIG  
ATOM   9533 O3   LIG     1     -33.152  19.402 -54.450  1.00  0.00      LIG  
ATOM   9534 O4   LIG     1     -30.656  20.601 -55.394  1.00  0.00      LIG  
ATOM   9535 O5   LIG     1     -29.975  19.479 -51.988  1.00  0.00      LIG  
ATOM   9536 H    LIG     1     -27.690  17.915 -57.308  1.00  0.00      LIG  
ATOM   9537 H1   LIG     1     -28.857  18.006 -55.972  1.00  0.00      LIG  
ATOM   9538 H2   LIG     1     -27.129  17.650 -55.641  1.00  0.00      LIG  
ATOM   9539 H3   LIG     1     -27.605  21.263 -54.872  1.00  0.00      LIG  
ATOM   9540 H4   LIG     1     -28.289  18.534 -53.789  1.00  0.00      LIG  
ATOM   9541 H5   LIG     1     -27.457  19.765 -51.653  1.00  0.00      LIG  
ATOM   9542 H6   LIG     1     -29.608  21.201 -53.038  1.00  0.00      LIG  
ATOM   9543 H7   LIG     1     -30.706  18.754 -54.524  1.00  0.00      LIG  
ATOM   9544 H8   LIG     1     -32.275  19.575 -52.640  1.00  0.00      LIG  
ATOM   9545 H9   LIG     1     -32.815  21.926 -54.516  1.00  0.00      LIG  
ATOM   9546 H10  LIG     1     -31.655  22.105 -53.179  1.00  0.00      LIG  
ATOM   9547 H11  LIG     1     -33.937  20.872 -52.401  1.00  0.00      LIG  
ATOM   9548 H12  LIG     1     -33.018  19.752 -55.348  1.00  0.00      LIG  
ATOM   9549 H13  LIG     1     -29.722  20.546 -55.666  1.00  0.00      LIG  
ATOM   9550 H14  LIG     1     -30.855  19.790 -51.715  1.00  0.00      LIG  
TER
REMARK  Energy: 9.26645
REMARK  SimpleFitness: 9.26645
REMARK  FullFitness: -2625.1123
REMARK  InterFull: -27.611
REMARK  IntraFull: 71.2068
REMARK  solvFull: -3071.36
REMARK  surfFull: 402.652
REMARK  extraFull: 0.0
REMARK  deltaGcompsolvpol: -3071.36
REMARK  deltaGcompsolvnonpol: 402.652
REMARK  deltaGprotsolvpol: -3070.97
REMARK  deltaGprotsolvnonpol: 403.01
REMARK  deltaGligsolvpol: -16.9473
REMARK  deltaGligsolvnonpol: 6.73544
REMARK  deltaGvdw: -27.611
REMARK  deltaGelec: 0.0
REMARK  deltaG: -6.259742
REMARK  Cluster: 12
REMARK  ClusterRank: 8
ATOM   9521 C    LIG     1     -25.625  18.366 -57.332  1.00  0.00      LIG  
ATOM   9522 C1   LIG     1     -26.776  18.119 -56.408  1.00  0.00      LIG  
ATOM   9523 O    LIG     1     -27.459  17.109 -56.475  1.00  0.00      LIG  
ATOM   9524 N    LIG     1     -26.974  19.151 -55.521  1.00  0.00      LIG  
ATOM   9525 C2   LIG     1     -28.040  19.117 -54.532  1.00  0.00      LIG  
ATOM   9526 C3   LIG     1     -27.485  19.828 -53.310  1.00  0.00      LIG  
ATOM   9527 O1   LIG     1     -26.291  19.984 -53.090  1.00  0.00      LIG  
ATOM   9528 C4   LIG     1     -29.359  19.693 -55.099  1.00  0.00      LIG  
ATOM   9529 C5   LIG     1     -30.594  18.944 -54.573  1.00  0.00      LIG  
ATOM   9530 C6   LIG     1     -30.837  19.003 -53.053  1.00  0.00      LIG  
ATOM   9531 C7   LIG     1     -31.249  20.346 -52.450  1.00  0.00      LIG  
ATOM   9532 O2   LIG     1     -32.448  20.878 -53.001  1.00  0.00      LIG  
ATOM   9533 O3   LIG     1     -31.831  18.041 -52.722  1.00  0.00      LIG  
ATOM   9534 O4   LIG     1     -31.751  19.361 -55.304  1.00  0.00      LIG  
ATOM   9535 O5   LIG     1     -29.471  21.109 -54.915  1.00  0.00      LIG  
ATOM   9536 H    LIG     1     -25.291  17.407 -57.738  1.00  0.00      LIG  
ATOM   9537 H1   LIG     1     -24.792  18.828 -56.794  1.00  0.00      LIG  
ATOM   9538 H2   LIG     1     -25.951  19.017 -58.148  1.00  0.00      LIG  
ATOM   9539 H3   LIG     1     -26.362  19.960 -55.552  1.00  0.00      LIG  
ATOM   9540 H4   LIG     1     -28.211  18.072 -54.259  1.00  0.00      LIG  
ATOM   9541 H5   LIG     1     -28.210  20.005 -52.503  1.00  0.00      LIG  
ATOM   9542 H6   LIG     1     -29.365  19.555 -56.186  1.00  0.00      LIG  
ATOM   9543 H7   LIG     1     -30.465  17.892 -54.836  1.00  0.00      LIG  
ATOM   9544 H8   LIG     1     -29.932  18.678 -52.538  1.00  0.00      LIG  
ATOM   9545 H9   LIG     1     -30.456  21.082 -52.591  1.00  0.00      LIG  
ATOM   9546 H10  LIG     1     -31.417  20.236 -51.374  1.00  0.00      LIG  
ATOM   9547 H11  LIG     1     -33.169  20.300 -52.693  1.00  0.00      LIG  
ATOM   9548 H12  LIG     1     -32.554  18.188 -53.357  1.00  0.00      LIG  
ATOM   9549 H13  LIG     1     -31.533  19.278 -56.248  1.00  0.00      LIG  
ATOM   9550 H14  LIG     1     -30.405  21.334 -55.078  1.00  0.00      LIG  
TER
REMARK  Energy: 9.26645
REMARK  SimpleFitness: 9.26645
REMARK  FullFitness: -2625.1123
REMARK  InterFull: -27.611
REMARK  IntraFull: 71.2068
REMARK  solvFull: -3071.36
REMARK  surfFull: 402.652
REMARK  extraFull: 0.0
REMARK  deltaGcompsolvpol: -3071.36
REMARK  deltaGcompsolvnonpol: 402.652
REMARK  deltaGprotsolvpol: -3070.97
REMARK  deltaGprotsolvnonpol: 403.01
REMARK  deltaGligsolvpol: -16.9473
REMARK  deltaGligsolvnonpol: 6.73544
REMARK  deltaGvdw: -27.611
REMARK  deltaGelec: 0.0
REMARK  deltaG: -6.259742
REMARK  Cluster: 12
REMARK  ClusterRank: 9
ATOM   9521 C    LIG     1     -25.625  18.366 -57.332  1.00  0.00      LIG  
ATOM   9522 C1   LIG     1     -26.776  18.119 -56.408  1.00  0.00      LIG  
ATOM   9523 O    LIG     1     -27.459  17.109 -56.475  1.00  0.00      LIG  
ATOM   9524 N    LIG     1     -26.974  19.151 -55.521  1.00  0.00      LIG  
ATOM   9525 C2   LIG     1     -28.040  19.117 -54.532  1.00  0.00      LIG  
ATOM   9526 C3   LIG     1     -27.485  19.828 -53.310  1.00  0.00      LIG  
ATOM   9527 O1   LIG     1     -26.291  19.984 -53.090  1.00  0.00      LIG  
ATOM   9528 C4   LIG     1     -29.359  19.693 -55.099  1.00  0.00      LIG  
ATOM   9529 C5   LIG     1     -30.594  18.944 -54.573  1.00  0.00      LIG  
ATOM   9530 C6   LIG     1     -30.837  19.003 -53.053  1.00  0.00      LIG  
ATOM   9531 C7   LIG     1     -31.249  20.346 -52.450  1.00  0.00      LIG  
ATOM   9532 O2   LIG     1     -32.448  20.878 -53.001  1.00  0.00      LIG  
ATOM   9533 O3   LIG     1     -31.831  18.041 -52.722  1.00  0.00      LIG  
ATOM   9534 O4   LIG     1     -31.751  19.361 -55.304  1.00  0.00      LIG  
ATOM   9535 O5   LIG     1     -29.471  21.109 -54.915  1.00  0.00      LIG  
ATOM   9536 H    LIG     1     -25.291  17.407 -57.738  1.00  0.00      LIG  
ATOM   9537 H1   LIG     1     -24.792  18.828 -56.794  1.00  0.00      LIG  
ATOM   9538 H2   LIG     1     -25.951  19.017 -58.148  1.00  0.00      LIG  
ATOM   9539 H3   LIG     1     -26.362  19.960 -55.552  1.00  0.00      LIG  
ATOM   9540 H4   LIG     1     -28.211  18.072 -54.259  1.00  0.00      LIG  
ATOM   9541 H5   LIG     1     -28.210  20.005 -52.503  1.00  0.00      LIG  
ATOM   9542 H6   LIG     1     -29.365  19.555 -56.186  1.00  0.00      LIG  
ATOM   9543 H7   LIG     1     -30.465  17.892 -54.836  1.00  0.00      LIG  
ATOM   9544 H8   LIG     1     -29.932  18.678 -52.538  1.00  0.00      LIG  
ATOM   9545 H9   LIG     1     -30.456  21.082 -52.591  1.00  0.00      LIG  
ATOM   9546 H10  LIG     1     -31.417  20.236 -51.374  1.00  0.00      LIG  
ATOM   9547 H11  LIG     1     -33.169  20.300 -52.693  1.00  0.00      LIG  
ATOM   9548 H12  LIG     1     -32.554  18.188 -53.357  1.00  0.00      LIG  
ATOM   9549 H13  LIG     1     -31.533  19.278 -56.248  1.00  0.00      LIG  
ATOM   9550 H14  LIG     1     -30.405  21.334 -55.078  1.00  0.00      LIG  
TER
REMARK  Energy: 8.65692
REMARK  SimpleFitness: 8.65692
REMARK  FullFitness: -2624.683
REMARK  InterFull: -30.3561
REMARK  IntraFull: 72.4421
REMARK  solvFull: -3069.36
REMARK  surfFull: 402.591
REMARK  extraFull: 0.0
REMARK  deltaGcompsolvpol: -3069.36
REMARK  deltaGcompsolvnonpol: 402.591
REMARK  deltaGprotsolvpol: -3070.97
REMARK  deltaGprotsolvnonpol: 403.01
REMARK  deltaGligsolvpol: -17.6327
REMARK  deltaGligsolvnonpol: 6.6729
REMARK  deltaGvdw: -30.3561
REMARK  deltaGelec: 0.0
REMARK  deltaG: -6.3549366
REMARK  Cluster: 12
REMARK  ClusterRank: 10
ATOM   9521 C    LIG     1     -25.611  18.614 -57.123  1.00  0.00      LIG  
ATOM   9522 C1   LIG     1     -26.782  18.313 -56.240  1.00  0.00      LIG  
ATOM   9523 O    LIG     1     -27.469  17.313 -56.382  1.00  0.00      LIG  
ATOM   9524 N    LIG     1     -26.964  19.272 -55.272  1.00  0.00      LIG  
ATOM   9525 C2   LIG     1     -28.033  19.189 -54.288  1.00  0.00      LIG  
ATOM   9526 C3   LIG     1     -27.556  20.048 -53.133  1.00  0.00      LIG  
ATOM   9527 O1   LIG     1     -26.379  20.171 -52.821  1.00  0.00      LIG  
ATOM   9528 C4   LIG     1     -29.403  19.572 -54.890  1.00  0.00      LIG  
ATOM   9529 C5   LIG     1     -30.566  18.836 -54.200  1.00  0.00      LIG  
ATOM   9530 C6   LIG     1     -30.961  19.318 -52.788  1.00  0.00      LIG  
ATOM   9531 C7   LIG     1     -31.672  20.670 -52.664  1.00  0.00      LIG  
ATOM   9532 O2   LIG     1     -32.842  20.780 -53.463  1.00  0.00      LIG  
ATOM   9533 O3   LIG     1     -31.779  18.324 -52.173  1.00  0.00      LIG  
ATOM   9534 O4   LIG     1     -31.687  18.828 -55.086  1.00  0.00      LIG  
ATOM   9535 O5   LIG     1     -29.607  20.986 -54.942  1.00  0.00      LIG  
ATOM   9536 H    LIG     1     -25.453  17.770 -57.800  1.00  0.00      LIG  
ATOM   9537 H1   LIG     1     -24.712  18.758 -56.515  1.00  0.00      LIG  
ATOM   9538 H2   LIG     1     -25.817  19.516 -57.708  1.00  0.00      LIG  
ATOM   9539 H3   LIG     1     -26.333  20.066 -55.240  1.00  0.00      LIG  
ATOM   9540 H4   LIG     1     -28.091  18.155 -53.941  1.00  0.00      LIG  
ATOM   9541 H5   LIG     1     -28.333  20.377 -52.430  1.00  0.00      LIG  
ATOM   9542 H6   LIG     1     -29.413  19.254 -55.938  1.00  0.00      LIG  
ATOM   9543 H7   LIG     1     -30.276  17.790 -54.111  1.00  0.00      LIG  
ATOM   9544 H8   LIG     1     -30.064  19.358 -52.169  1.00  0.00      LIG  
ATOM   9545 H9   LIG     1     -31.002  21.488 -52.938  1.00  0.00      LIG  
ATOM   9546 H10  LIG     1     -31.987  20.827 -51.629  1.00  0.00      LIG  
ATOM   9547 H11  LIG     1     -33.362  19.974 -53.296  1.00  0.00      LIG  
ATOM   9548 H12  LIG     1     -32.168  18.738 -51.382  1.00  0.00      LIG  
ATOM   9549 H13  LIG     1     -31.367  18.482 -55.936  1.00  0.00      LIG  
ATOM   9550 H14  LIG     1     -30.536  21.120 -55.204  1.00  0.00      LIG  
TER
REMARK  Energy: 11.0607
REMARK  SimpleFitness: 11.0607
REMARK  FullFitness: -2622.5723
REMARK  InterFull: -23.9894
REMARK  IntraFull: 70.6903
REMARK  solvFull: -3072.06
REMARK  surfFull: 402.787
REMARK  extraFull: 0.0
REMARK  deltaGcompsolvpol: -3072.06
REMARK  deltaGcompsolvnonpol: 402.787
REMARK  deltaGprotsolvpol: -3070.97
REMARK  deltaGprotsolvnonpol: 403.01
REMARK  deltaGligsolvpol: -16.6989
REMARK  deltaGligsolvnonpol: 6.55266
REMARK  deltaGvdw: -23.9894
REMARK  deltaGelec: 0.0
REMARK  deltaG: -5.9451175
REMARK  Cluster: 12
REMARK  ClusterRank: 11
ATOM   9521 C    LIG     1     -26.136  19.150 -58.060  1.00  0.00      LIG  
ATOM   9522 C1   LIG     1     -26.417  18.736 -56.647  1.00  0.00      LIG  
ATOM   9523 O    LIG     1     -26.460  17.562 -56.314  1.00  0.00      LIG  
ATOM   9524 N    LIG     1     -26.740  19.803 -55.837  1.00  0.00      LIG  
ATOM   9525 C2   LIG     1     -26.995  19.654 -54.410  1.00  0.00      LIG  
ATOM   9526 C3   LIG     1     -25.883  20.476 -53.804  1.00  0.00      LIG  
ATOM   9527 O1   LIG     1     -24.704  20.160 -53.888  1.00  0.00      LIG  
ATOM   9528 C4   LIG     1     -28.385  20.131 -53.936  1.00  0.00      LIG  
ATOM   9529 C5   LIG     1     -29.527  19.264 -54.506  1.00  0.00      LIG  
ATOM   9530 C6   LIG     1     -30.952  19.609 -54.032  1.00  0.00      LIG  
ATOM   9531 C7   LIG     1     -31.457  18.713 -52.904  1.00  0.00      LIG  
ATOM   9532 O2   LIG     1     -30.874  19.010 -51.643  1.00  0.00      LIG  
ATOM   9533 O3   LIG     1     -31.075  20.990 -53.689  1.00  0.00      LIG  
ATOM   9534 O4   LIG     1     -29.546  19.395 -55.926  1.00  0.00      LIG  
ATOM   9535 O5   LIG     1     -28.414  20.062 -52.510  1.00  0.00      LIG  
ATOM   9536 H    LIG     1     -27.055  19.069 -58.646  1.00  0.00      LIG  
ATOM   9537 H1   LIG     1     -25.371  18.487 -58.473  1.00  0.00      LIG  
ATOM   9538 H2   LIG     1     -25.765  20.179 -58.102  1.00  0.00      LIG  
ATOM   9539 H3   LIG     1     -26.662  20.739 -56.222  1.00  0.00      LIG  
ATOM   9540 H4   LIG     1     -26.836  18.621 -54.099  1.00  0.00      LIG  
ATOM   9541 H5   LIG     1     -26.152  21.523 -53.600  1.00  0.00      LIG  
ATOM   9542 H6   LIG     1     -28.526  21.177 -54.230  1.00  0.00      LIG  
ATOM   9543 H7   LIG     1     -29.335  18.210 -54.287  1.00  0.00      LIG  
ATOM   9544 H8   LIG     1     -31.650  19.446 -54.860  1.00  0.00      LIG  
ATOM   9545 H9   LIG     1     -31.267  17.662 -53.137  1.00  0.00      LIG  
ATOM   9546 H10  LIG     1     -32.534  18.843 -52.794  1.00  0.00      LIG  
ATOM   9547 H11  LIG     1     -31.179  19.905 -51.411  1.00  0.00      LIG  
ATOM   9548 H12  LIG     1     -30.778  21.493 -54.466  1.00  0.00      LIG  
ATOM   9549 H13  LIG     1     -28.637  19.222 -56.228  1.00  0.00      LIG  
ATOM   9550 H14  LIG     1     -29.317  19.800 -52.250  1.00  0.00      LIG  
TER
REMARK  Energy: 5.70382
REMARK  SimpleFitness: 5.70382
REMARK  FullFitness: -2632.324
REMARK  InterFull: -30.8687
REMARK  IntraFull: 64.6426
REMARK  solvFull: -3068.67
REMARK  surfFull: 402.572
REMARK  extraFull: 0.0
REMARK  deltaGcompsolvpol: -3068.67
REMARK  deltaGcompsolvnonpol: 402.572
REMARK  deltaGprotsolvpol: -3070.97
REMARK  deltaGprotsolvnonpol: 403.01
REMARK  deltaGligsolvpol: -17.2981
REMARK  deltaGligsolvnonpol: 6.49266
REMARK  deltaGvdw: -30.8687
REMARK  deltaGelec: 0.0
REMARK  deltaG: -6.3664145
REMARK  Cluster: 13
REMARK  ClusterRank: 0
ATOM   9521 C    LIG     1       1.681  22.839 -16.874  1.00  0.00      LIG  
ATOM   9522 C1   LIG     1       0.542  22.773 -17.847  1.00  0.00      LIG  
ATOM   9523 O    LIG     1      -0.289  23.664 -17.932  1.00  0.00      LIG  
ATOM   9524 N    LIG     1       0.581  21.659 -18.652  1.00  0.00      LIG  
ATOM   9525 C2   LIG     1      -0.367  21.482 -19.738  1.00  0.00      LIG  
ATOM   9526 C3   LIG     1       0.242  20.425 -20.626  1.00  0.00      LIG  
ATOM   9527 O1   LIG     1       1.342  20.553 -21.147  1.00  0.00      LIG  
ATOM   9528 C4   LIG     1      -1.799  21.130 -19.280  1.00  0.00      LIG  
ATOM   9529 C5   LIG     1      -2.760  21.165 -20.476  1.00  0.00      LIG  
ATOM   9530 C6   LIG     1      -4.196  20.753 -20.128  1.00  0.00      LIG  
ATOM   9531 C7   LIG     1      -5.174  20.988 -21.280  1.00  0.00      LIG  
ATOM   9532 O2   LIG     1      -5.523  22.360 -21.421  1.00  0.00      LIG  
ATOM   9533 O3   LIG     1      -4.245  19.365 -19.819  1.00  0.00      LIG  
ATOM   9534 O4   LIG     1      -2.745  22.485 -21.016  1.00  0.00      LIG  
ATOM   9535 O5   LIG     1      -1.833  19.871 -18.604  1.00  0.00      LIG  
ATOM   9536 H    LIG     1       2.326  23.677 -17.150  1.00  0.00      LIG  
ATOM   9537 H1   LIG     1       2.273  21.918 -16.878  1.00  0.00      LIG  
ATOM   9538 H2   LIG     1       1.278  22.996 -15.870  1.00  0.00      LIG  
ATOM   9539 H3   LIG     1       1.358  21.011 -18.570  1.00  0.00      LIG  
ATOM   9540 H4   LIG     1      -0.377  22.418 -20.303  1.00  0.00      LIG  
ATOM   9541 H5   LIG     1      -0.212  19.425 -20.552  1.00  0.00      LIG  
ATOM   9542 H6   LIG     1      -2.124  21.881 -18.555  1.00  0.00      LIG  
ATOM   9543 H7   LIG     1      -2.390  20.482 -21.242  1.00  0.00      LIG  
ATOM   9544 H8   LIG     1      -4.515  21.308 -19.246  1.00  0.00      LIG  
ATOM   9545 H9   LIG     1      -6.098  20.423 -21.126  1.00  0.00      LIG  
ATOM   9546 H10  LIG     1      -4.741  20.643 -22.221  1.00  0.00      LIG  
ATOM   9547 H11  LIG     1      -4.682  22.849 -21.464  1.00  0.00      LIG  
ATOM   9548 H12  LIG     1      -4.009  18.890 -20.641  1.00  0.00      LIG  
ATOM   9549 H13  LIG     1      -2.936  23.090 -20.277  1.00  0.00      LIG  
ATOM   9550 H14  LIG     1      -2.747  19.538 -18.676  1.00  0.00      LIG  
TER
REMARK  Energy: 6.54621
REMARK  SimpleFitness: 6.54621
REMARK  FullFitness: -2630.9668
REMARK  InterFull: -32.4139
REMARK  IntraFull: 66.6552
REMARK  solvFull: -3067.84
REMARK  surfFull: 402.632
REMARK  extraFull: 0.0
REMARK  deltaGcompsolvpol: -3067.84
REMARK  deltaGcompsolvnonpol: 402.632
REMARK  deltaGprotsolvpol: -3070.97
REMARK  deltaGprotsolvnonpol: 403.01
REMARK  deltaGligsolvpol: -18.0153
REMARK  deltaGligsolvnonpol: 6.50418
REMARK  deltaGvdw: -32.4139
REMARK  deltaGelec: 0.0
REMARK  deltaG: -6.413326
REMARK  Cluster: 13
REMARK  ClusterRank: 1
ATOM   9521 C    LIG     1       2.338  21.893 -17.624  1.00  0.00      LIG  
ATOM   9522 C1   LIG     1       1.162  22.089 -18.534  1.00  0.00      LIG  
ATOM   9523 O    LIG     1       0.652  23.185 -18.713  1.00  0.00      LIG  
ATOM   9524 N    LIG     1       0.746  20.926 -19.135  1.00  0.00      LIG  
ATOM   9525 C2   LIG     1      -0.343  20.918 -20.093  1.00  0.00      LIG  
ATOM   9526 C3   LIG     1      -0.072  19.728 -20.985  1.00  0.00      LIG  
ATOM   9527 O1   LIG     1       0.913  19.654 -21.705  1.00  0.00      LIG  
ATOM   9528 C4   LIG     1      -1.744  20.894 -19.449  1.00  0.00      LIG  
ATOM   9529 C5   LIG     1      -2.793  21.103 -20.550  1.00  0.00      LIG  
ATOM   9530 C6   LIG     1      -4.246  20.802 -20.164  1.00  0.00      LIG  
ATOM   9531 C7   LIG     1      -5.216  21.130 -21.300  1.00  0.00      LIG  
ATOM   9532 O2   LIG     1      -5.444  22.529 -21.419  1.00  0.00      LIG  
ATOM   9533 O3   LIG     1      -4.409  19.418 -19.874  1.00  0.00      LIG  
ATOM   9534 O4   LIG     1      -2.668  22.445 -21.017  1.00  0.00      LIG  
ATOM   9535 O5   LIG     1      -1.957  19.690 -18.708  1.00  0.00      LIG  
ATOM   9536 H    LIG     1       3.144  22.559 -17.943  1.00  0.00      LIG  
ATOM   9537 H1   LIG     1       2.704  20.861 -17.653  1.00  0.00      LIG  
ATOM   9538 H2   LIG     1       2.039  22.134 -16.601  1.00  0.00      LIG  
ATOM   9539 H3   LIG     1       1.205  20.049 -18.907  1.00  0.00      LIG  
ATOM   9540 H4   LIG     1      -0.242  21.813 -20.714  1.00  0.00      LIG  
ATOM   9541 H5   LIG     1      -0.631  18.813 -20.735  1.00  0.00      LIG  
ATOM   9542 H6   LIG     1      -1.813  21.718 -18.731  1.00  0.00      LIG  
ATOM   9543 H7   LIG     1      -2.541  20.444 -21.377  1.00  0.00      LIG  
ATOM   9544 H8   LIG     1      -4.502  21.371 -19.272  1.00  0.00      LIG  
ATOM   9545 H9   LIG     1      -6.184  20.646 -21.139  1.00  0.00      LIG  
ATOM   9546 H10  LIG     1      -4.828  20.760 -22.252  1.00  0.00      LIG  
ATOM   9547 H11  LIG     1      -4.562  22.942 -21.434  1.00  0.00      LIG  
ATOM   9548 H12  LIG     1      -4.138  18.932 -20.678  1.00  0.00      LIG  
ATOM   9549 H13  LIG     1      -2.704  23.022 -20.232  1.00  0.00      LIG  
ATOM   9550 H14  LIG     1      -2.917  19.519 -18.720  1.00  0.00      LIG  
TER
REMARK  Energy: 6.8678
REMARK  SimpleFitness: 6.8678
REMARK  FullFitness: -2629.5615
REMARK  InterFull: -27.0266
REMARK  IntraFull: 63.1802
REMARK  solvFull: -3067.98
REMARK  surfFull: 402.265
REMARK  extraFull: 0.0
REMARK  deltaGcompsolvpol: -3067.98
REMARK  deltaGcompsolvnonpol: 402.265
REMARK  deltaGprotsolvpol: -3070.97
REMARK  deltaGprotsolvnonpol: 403.01
REMARK  deltaGligsolvpol: -17.6207
REMARK  deltaGligsolvnonpol: 6.50091
REMARK  deltaGvdw: -27.0266
REMARK  deltaGelec: 0.0
REMARK  deltaG: -5.9708047
REMARK  Cluster: 13
REMARK  ClusterRank: 2
ATOM   9521 C    LIG     1       0.767  22.740 -16.031  1.00  0.00      LIG  
ATOM   9522 C1   LIG     1      -0.132  22.806 -17.228  1.00  0.00      LIG  
ATOM   9523 O    LIG     1      -1.067  23.589 -17.293  1.00  0.00      LIG  
ATOM   9524 N    LIG     1       0.176  21.863 -18.182  1.00  0.00      LIG  
ATOM   9525 C2   LIG     1      -0.577  21.757 -19.420  1.00  0.00      LIG  
ATOM   9526 C3   LIG     1       0.264  20.924 -20.363  1.00  0.00      LIG  
ATOM   9527 O1   LIG     1       1.478  20.807 -20.265  1.00  0.00      LIG  
ATOM   9528 C4   LIG     1      -1.992  21.174 -19.216  1.00  0.00      LIG  
ATOM   9529 C5   LIG     1      -2.870  21.363 -20.457  1.00  0.00      LIG  
ATOM   9530 C6   LIG     1      -4.313  20.943 -20.179  1.00  0.00      LIG  
ATOM   9531 C7   LIG     1      -5.324  21.501 -21.184  1.00  0.00      LIG  
ATOM   9532 O2   LIG     1      -4.938  21.271 -22.525  1.00  0.00      LIG  
ATOM   9533 O3   LIG     1      -4.443  19.527 -20.100  1.00  0.00      LIG  
ATOM   9534 O4   LIG     1      -2.850  22.742 -20.822  1.00  0.00      LIG  
ATOM   9535 O5   LIG     1      -1.950  19.797 -18.833  1.00  0.00      LIG  
ATOM   9536 H    LIG     1       1.015  23.758 -15.720  1.00  0.00      LIG  
ATOM   9537 H1   LIG     1       1.697  22.207 -16.258  1.00  0.00      LIG  
ATOM   9538 H2   LIG     1       0.244  22.222 -15.223  1.00  0.00      LIG  
ATOM   9539 H3   LIG     1       1.020  21.308 -18.085  1.00  0.00      LIG  
ATOM   9540 H4   LIG     1      -0.641  22.764 -19.840  1.00  0.00      LIG  
ATOM   9541 H5   LIG     1      -0.239  20.621 -21.294  1.00  0.00      LIG  
ATOM   9542 H6   LIG     1      -2.466  21.710 -18.390  1.00  0.00      LIG  
ATOM   9543 H7   LIG     1      -2.469  20.770 -21.281  1.00  0.00      LIG  
ATOM   9544 H8   LIG     1      -4.582  21.313 -19.192  1.00  0.00      LIG  
ATOM   9545 H9   LIG     1      -5.435  22.581 -21.054  1.00  0.00      LIG  
ATOM   9546 H10  LIG     1      -6.305  21.036 -21.046  1.00  0.00      LIG  
ATOM   9547 H11  LIG     1      -4.855  20.306 -22.624  1.00  0.00      LIG  
ATOM   9548 H12  LIG     1      -4.056  19.149 -20.915  1.00  0.00      LIG  
ATOM   9549 H13  LIG     1      -3.209  23.239 -20.065  1.00  0.00      LIG  
ATOM   9550 H14  LIG     1      -2.850  19.444 -18.960  1.00  0.00      LIG  
TER
REMARK  Energy: 8.46967
REMARK  SimpleFitness: 8.46967
REMARK  FullFitness: -2626.148
REMARK  InterFull: -29.7835
REMARK  IntraFull: 68.4065
REMARK  solvFull: -3067.07
REMARK  surfFull: 402.299
REMARK  extraFull: 0.0
REMARK  deltaGcompsolvpol: -3067.07
REMARK  deltaGcompsolvnonpol: 402.299
REMARK  deltaGprotsolvpol: -3070.97
REMARK  deltaGprotsolvnonpol: 403.01
REMARK  deltaGligsolvpol: -19.7713
REMARK  deltaGligsolvnonpol: 6.4943
REMARK  deltaGvdw: -29.7835
REMARK  deltaGelec: 0.0
REMARK  deltaG: -6.040463
REMARK  Cluster: 13
REMARK  ClusterRank: 3
ATOM   9521 C    LIG     1       0.998  22.708 -16.209  1.00  0.00      LIG  
ATOM   9522 C1   LIG     1       0.050  22.756 -17.370  1.00  0.00      LIG  
ATOM   9523 O    LIG     1      -0.852  23.577 -17.435  1.00  0.00      LIG  
ATOM   9524 N    LIG     1       0.284  21.765 -18.295  1.00  0.00      LIG  
ATOM   9525 C2   LIG     1      -0.507  21.650 -19.508  1.00  0.00      LIG  
ATOM   9526 C3   LIG     1       0.267  20.742 -20.439  1.00  0.00      LIG  
ATOM   9527 O1   LIG     1       1.464  20.513 -20.327  1.00  0.00      LIG  
ATOM   9528 C4   LIG     1      -1.946  21.149 -19.251  1.00  0.00      LIG  
ATOM   9529 C5   LIG     1      -2.826  21.291 -20.497  1.00  0.00      LIG  
ATOM   9530 C6   LIG     1      -4.290  20.960 -20.198  1.00  0.00      LIG  
ATOM   9531 C7   LIG     1      -5.281  21.574 -21.191  1.00  0.00      LIG  
ATOM   9532 O2   LIG     1      -4.945  21.292 -22.536  1.00  0.00      LIG  
ATOM   9533 O3   LIG     1      -4.505  19.553 -20.128  1.00  0.00      LIG  
ATOM   9534 O4   LIG     1      -2.733  22.638 -20.957  1.00  0.00      LIG  
ATOM   9535 O5   LIG     1      -1.968  19.805 -18.756  1.00  0.00      LIG  
ATOM   9536 H    LIG     1       1.328  23.725 -15.983  1.00  0.00      LIG  
ATOM   9537 H1   LIG     1       1.878  22.097 -16.435  1.00  0.00      LIG  
ATOM   9538 H2   LIG     1       0.479  22.285 -15.345  1.00  0.00      LIG  
ATOM   9539 H3   LIG     1       1.114  21.186 -18.208  1.00  0.00      LIG  
ATOM   9540 H4   LIG     1      -0.529  22.643 -19.965  1.00  0.00      LIG  
ATOM   9541 H5   LIG     1      -0.251  20.476 -21.372  1.00  0.00      LIG  
ATOM   9542 H6   LIG     1      -2.384  21.771 -18.465  1.00  0.00      LIG  
ATOM   9543 H7   LIG     1      -2.456  20.625 -21.278  1.00  0.00      LIG  
ATOM   9544 H8   LIG     1      -4.528  21.342 -19.207  1.00  0.00      LIG  
ATOM   9545 H9   LIG     1      -5.317  22.661 -21.077  1.00  0.00      LIG  
ATOM   9546 H10  LIG     1      -6.288  21.178 -21.026  1.00  0.00      LIG  
ATOM   9547 H11  LIG     1      -4.880  20.323 -22.602  1.00  0.00      LIG  
ATOM   9548 H12  LIG     1      -4.070  19.150 -20.905  1.00  0.00      LIG  
ATOM   9549 H13  LIG     1      -3.071  23.204 -20.240  1.00  0.00      LIG  
ATOM   9550 H14  LIG     1      -1.608  19.227 -19.451  1.00  0.00      LIG  
TER
REMARK  Energy: 10.7657
REMARK  SimpleFitness: 10.7657
REMARK  FullFitness: -2624.7107
REMARK  InterFull: -25.8397
REMARK  IntraFull: 68.396
REMARK  solvFull: -3069.62
REMARK  surfFull: 402.353
REMARK  extraFull: 0.0
REMARK  deltaGcompsolvpol: -3069.62
REMARK  deltaGcompsolvnonpol: 402.353
REMARK  deltaGprotsolvpol: -3070.97
REMARK  deltaGprotsolvnonpol: 403.01
REMARK  deltaGligsolvpol: -20.5989
REMARK  deltaGligsolvnonpol: 6.70618
REMARK  deltaGvdw: -25.8397
REMARK  deltaGelec: 0.0
REMARK  deltaG: -5.7877297
REMARK  Cluster: 13
REMARK  ClusterRank: 4
ATOM   9521 C    LIG     1       2.793  21.471 -17.739  1.00  0.00      LIG  
ATOM   9522 C1   LIG     1       1.605  21.856 -18.573  1.00  0.00      LIG  
ATOM   9523 O    LIG     1       1.277  23.021 -18.729  1.00  0.00      LIG  
ATOM   9524 N    LIG     1       0.961  20.779 -19.138  1.00  0.00      LIG  
ATOM   9525 C2   LIG     1      -0.214  20.949 -19.978  1.00  0.00      LIG  
ATOM   9526 C3   LIG     1      -0.254  19.699 -20.825  1.00  0.00      LIG  
ATOM   9527 O1   LIG     1       0.616  19.432 -21.642  1.00  0.00      LIG  
ATOM   9528 C4   LIG     1      -1.495  21.236 -19.159  1.00  0.00      LIG  
ATOM   9529 C5   LIG     1      -2.677  21.747 -19.995  1.00  0.00      LIG  
ATOM   9530 C6   LIG     1      -2.419  23.129 -20.603  1.00  0.00      LIG  
ATOM   9531 C7   LIG     1      -3.555  23.593 -21.513  1.00  0.00      LIG  
ATOM   9532 O2   LIG     1      -4.830  23.408 -20.906  1.00  0.00      LIG  
ATOM   9533 O3   LIG     1      -2.226  24.079 -19.557  1.00  0.00      LIG  
ATOM   9534 O4   LIG     1      -2.995  20.848 -21.042  1.00  0.00      LIG  
ATOM   9535 O5   LIG     1      -1.918  20.090 -18.409  1.00  0.00      LIG  
ATOM   9536 H    LIG     1       2.661  21.876 -16.732  1.00  0.00      LIG  
ATOM   9537 H1   LIG     1       3.694  21.892 -18.193  1.00  0.00      LIG  
ATOM   9538 H2   LIG     1       2.907  20.385 -17.671  1.00  0.00      LIG  
ATOM   9539 H3   LIG     1       1.283  19.837 -18.934  1.00  0.00      LIG  
ATOM   9540 H4   LIG     1      -0.007  21.787 -20.647  1.00  0.00      LIG  
ATOM   9541 H5   LIG     1      -0.915  18.899 -20.456  1.00  0.00      LIG  
ATOM   9542 H6   LIG     1      -1.260  22.000 -18.414  1.00  0.00      LIG  
ATOM   9543 H7   LIG     1      -3.558  21.773 -19.352  1.00  0.00      LIG  
ATOM   9544 H8   LIG     1      -1.509  23.123 -21.208  1.00  0.00      LIG  
ATOM   9545 H9   LIG     1      -3.554  23.028 -22.448  1.00  0.00      LIG  
ATOM   9546 H10  LIG     1      -3.450  24.655 -21.752  1.00  0.00      LIG  
ATOM   9547 H11  LIG     1      -4.736  23.653 -19.968  1.00  0.00      LIG  
ATOM   9548 H12  LIG     1      -2.972  23.977 -18.938  1.00  0.00      LIG  
ATOM   9549 H13  LIG     1      -3.120  19.967 -20.644  1.00  0.00      LIG  
ATOM   9550 H14  LIG     1      -2.735  20.341 -17.945  1.00  0.00      LIG  
TER
REMARK  Energy: 9.76885
REMARK  SimpleFitness: 9.76885
REMARK  FullFitness: -2624.3325
REMARK  InterFull: -31.8254
REMARK  IntraFull: 72.8549
REMARK  solvFull: -3067.61
REMARK  surfFull: 402.248
REMARK  extraFull: 0.0
REMARK  deltaGcompsolvpol: -3067.61
REMARK  deltaGcompsolvnonpol: 402.248
REMARK  deltaGprotsolvpol: -3070.97
REMARK  deltaGprotsolvnonpol: 403.01
REMARK  deltaGligsolvpol: -19.8465
REMARK  deltaGligsolvnonpol: 6.72839
REMARK  deltaGvdw: -31.8254
REMARK  deltaGelec: 0.0
REMARK  deltaG: -6.289047
REMARK  Cluster: 13
REMARK  ClusterRank: 5
ATOM   9521 C    LIG     1       1.863  21.988 -18.268  1.00  0.00      LIG  
ATOM   9522 C1   LIG     1       0.564  22.013 -19.018  1.00  0.00      LIG  
ATOM   9523 O    LIG     1       0.061  23.055 -19.410  1.00  0.00      LIG  
ATOM   9524 N    LIG     1       0.015  20.765 -19.190  1.00  0.00      LIG  
ATOM   9525 C2   LIG     1      -1.242  20.576 -19.892  1.00  0.00      LIG  
ATOM   9526 C3   LIG     1      -1.217  19.133 -20.311  1.00  0.00      LIG  
ATOM   9527 O1   LIG     1      -0.406  18.702 -21.119  1.00  0.00      LIG  
ATOM   9528 C4   LIG     1      -2.481  20.988 -19.063  1.00  0.00      LIG  
ATOM   9529 C5   LIG     1      -3.825  20.955 -19.818  1.00  0.00      LIG  
ATOM   9530 C6   LIG     1      -3.809  21.826 -21.079  1.00  0.00      LIG  
ATOM   9531 C7   LIG     1      -5.018  21.660 -21.996  1.00  0.00      LIG  
ATOM   9532 O2   LIG     1      -6.238  22.000 -21.360  1.00  0.00      LIG  
ATOM   9533 O3   LIG     1      -3.648  23.198 -20.726  1.00  0.00      LIG  
ATOM   9534 O4   LIG     1      -4.239  19.622 -20.106  1.00  0.00      LIG  
ATOM   9535 O5   LIG     1      -2.599  20.216 -17.861  1.00  0.00      LIG  
ATOM   9536 H    LIG     1       1.718  22.465 -17.295  1.00  0.00      LIG  
ATOM   9537 H1   LIG     1       2.612  22.537 -18.844  1.00  0.00      LIG  
ATOM   9538 H2   LIG     1       2.220  20.964 -18.113  1.00  0.00      LIG  
ATOM   9539 H3   LIG     1       0.509  19.946 -18.847  1.00  0.00      LIG  
ATOM   9540 H4   LIG     1      -1.180  21.177 -20.802  1.00  0.00      LIG  
ATOM   9541 H5   LIG     1      -1.733  18.437 -19.633  1.00  0.00      LIG  
ATOM   9542 H6   LIG     1      -2.320  22.018 -18.735  1.00  0.00      LIG  
ATOM   9543 H7   LIG     1      -4.577  21.331 -19.129  1.00  0.00      LIG  
ATOM   9544 H8   LIG     1      -2.946  21.562 -21.685  1.00  0.00      LIG  
ATOM   9545 H9   LIG     1      -5.093  20.630 -22.344  1.00  0.00      LIG  
ATOM   9546 H10  LIG     1      -4.920  22.313 -22.869  1.00  0.00      LIG  
ATOM   9547 H11  LIG     1      -6.076  22.839 -20.896  1.00  0.00      LIG  
ATOM   9548 H12  LIG     1      -3.921  23.290 -19.793  1.00  0.00      LIG  
ATOM   9549 H13  LIG     1      -3.800  19.327 -20.929  1.00  0.00      LIG  
ATOM   9550 H14  LIG     1      -3.194  19.476 -18.073  1.00  0.00      LIG  
TER
REMARK  Energy: 13.1753
REMARK  SimpleFitness: 13.1753
REMARK  FullFitness: -2624.0542
REMARK  InterFull: -32.2334
REMARK  IntraFull: 73.9693
REMARK  solvFull: -3068.31
REMARK  surfFull: 402.52
REMARK  extraFull: 0.0
REMARK  deltaGcompsolvpol: -3068.31
REMARK  deltaGcompsolvnonpol: 402.52
REMARK  deltaGprotsolvpol: -3070.97
REMARK  deltaGprotsolvnonpol: 403.01
REMARK  deltaGligsolvpol: -21.6888
REMARK  deltaGligsolvnonpol: 6.61369
REMARK  deltaGvdw: -32.2334
REMARK  deltaGelec: 0.0
REMARK  deltaG: -6.2211494
REMARK  Cluster: 13
REMARK  ClusterRank: 6
ATOM   9521 C    LIG     1       1.156  24.573 -16.746  1.00  0.00      LIG  
ATOM   9522 C1   LIG     1       0.540  23.271 -17.161  1.00  0.00      LIG  
ATOM   9523 O    LIG     1       0.366  22.366 -16.360  1.00  0.00      LIG  
ATOM   9524 N    LIG     1       0.322  23.207 -18.523  1.00  0.00      LIG  
ATOM   9525 C2   LIG     1      -0.320  22.098 -19.227  1.00  0.00      LIG  
ATOM   9526 C3   LIG     1       0.639  20.924 -19.305  1.00  0.00      LIG  
ATOM   9527 O1   LIG     1       1.856  21.034 -19.225  1.00  0.00      LIG  
ATOM   9528 C4   LIG     1      -1.741  21.782 -18.697  1.00  0.00      LIG  
ATOM   9529 C5   LIG     1      -2.721  21.286 -19.771  1.00  0.00      LIG  
ATOM   9530 C6   LIG     1      -3.022  22.299 -20.879  1.00  0.00      LIG  
ATOM   9531 C7   LIG     1      -4.368  21.963 -21.512  1.00  0.00      LIG  
ATOM   9532 O2   LIG     1      -4.543  22.707 -22.713  1.00  0.00      LIG  
ATOM   9533 O3   LIG     1      -3.079  23.630 -20.365  1.00  0.00      LIG  
ATOM   9534 O4   LIG     1      -2.215  20.094 -20.368  1.00  0.00      LIG  
ATOM   9535 O5   LIG     1      -1.738  20.826 -17.630  1.00  0.00      LIG  
ATOM   9536 H    LIG     1       2.243  24.461 -16.708  1.00  0.00      LIG  
ATOM   9537 H1   LIG     1       0.776  24.839 -15.756  1.00  0.00      LIG  
ATOM   9538 H2   LIG     1       0.897  25.376 -17.444  1.00  0.00      LIG  
ATOM   9539 H3   LIG     1       0.566  24.025 -19.071  1.00  0.00      LIG  
ATOM   9540 H4   LIG     1      -0.413  22.461 -20.252  1.00  0.00      LIG  
ATOM   9541 H5   LIG     1       0.207  19.990 -19.691  1.00  0.00      LIG  
ATOM   9542 H6   LIG     1      -2.155  22.695 -18.264  1.00  0.00      LIG  
ATOM   9543 H7   LIG     1      -3.658  21.013 -19.278  1.00  0.00      LIG  
ATOM   9544 H8   LIG     1      -2.242  22.281 -21.647  1.00  0.00      LIG  
ATOM   9545 H9   LIG     1      -5.192  22.218 -20.840  1.00  0.00      LIG  
ATOM   9546 H10  LIG     1      -4.432  20.900 -21.761  1.00  0.00      LIG  
ATOM   9547 H11  LIG     1      -4.336  23.631 -22.488  1.00  0.00      LIG  
ATOM   9548 H12  LIG     1      -3.645  23.606 -19.569  1.00  0.00      LIG  
ATOM   9549 H13  LIG     1      -2.913  19.716 -20.938  1.00  0.00      LIG  
ATOM   9550 H14  LIG     1      -1.614  19.953 -18.042  1.00  0.00      LIG  
TER
REMARK  Energy: 13.0084
REMARK  SimpleFitness: 13.0084
REMARK  FullFitness: -2621.8198
REMARK  InterFull: -25.3563
REMARK  IntraFull: 70.7944
REMARK  solvFull: -3069.4
REMARK  surfFull: 402.142
REMARK  extraFull: 0.0
REMARK  deltaGcompsolvpol: -3069.4
REMARK  deltaGcompsolvnonpol: 402.142
REMARK  deltaGprotsolvpol: -3070.97
REMARK  deltaGprotsolvnonpol: 403.01
REMARK  deltaGligsolvpol: -19.9081
REMARK  deltaGligsolvnonpol: 6.70052
REMARK  deltaGvdw: -25.3563
REMARK  deltaGelec: 0.0
REMARK  deltaG: -5.790225
REMARK  Cluster: 13
REMARK  ClusterRank: 7
ATOM   9521 C    LIG     1       1.797  22.714 -19.053  1.00  0.00      LIG  
ATOM   9522 C1   LIG     1       0.488  21.982 -19.011  1.00  0.00      LIG  
ATOM   9523 O    LIG     1       0.003  21.610 -17.955  1.00  0.00      LIG  
ATOM   9524 N    LIG     1      -0.063  21.819 -20.267  1.00  0.00      LIG  
ATOM   9525 C2   LIG     1      -1.322  21.139 -20.555  1.00  0.00      LIG  
ATOM   9526 C3   LIG     1      -1.050  19.648 -20.558  1.00  0.00      LIG  
ATOM   9527 O1   LIG     1      -0.026  19.157 -21.015  1.00  0.00      LIG  
ATOM   9528 C4   LIG     1      -2.521  21.627 -19.704  1.00  0.00      LIG  
ATOM   9529 C5   LIG     1      -3.797  21.858 -20.530  1.00  0.00      LIG  
ATOM   9530 C6   LIG     1      -3.702  23.059 -21.464  1.00  0.00      LIG  
ATOM   9531 C7   LIG     1      -5.037  23.280 -22.171  1.00  0.00      LIG  
ATOM   9532 O2   LIG     1      -4.886  24.254 -23.196  1.00  0.00      LIG  
ATOM   9533 O3   LIG     1      -3.365  24.219 -20.705  1.00  0.00      LIG  
ATOM   9534 O4   LIG     1      -4.138  20.718 -21.296  1.00  0.00      LIG  
ATOM   9535 O5   LIG     1      -2.837  20.743 -18.621  1.00  0.00      LIG  
ATOM   9536 H    LIG     1       2.510  22.192 -18.409  1.00  0.00      LIG  
ATOM   9537 H1   LIG     1       1.644  23.733 -18.687  1.00  0.00      LIG  
ATOM   9538 H2   LIG     1       2.206  22.753 -20.067  1.00  0.00      LIG  
ATOM   9539 H3   LIG     1       0.497  22.115 -21.059  1.00  0.00      LIG  
ATOM   9540 H4   LIG     1      -1.525  21.397 -21.595  1.00  0.00      LIG  
ATOM   9541 H5   LIG     1      -1.923  19.011 -20.356  1.00  0.00      LIG  
ATOM   9542 H6   LIG     1      -2.257  22.575 -19.231  1.00  0.00      LIG  
ATOM   9543 H7   LIG     1      -4.634  22.010 -19.852  1.00  0.00      LIG  
ATOM   9544 H8   LIG     1      -2.921  22.915 -22.217  1.00  0.00      LIG  
ATOM   9545 H9   LIG     1      -5.793  23.644 -21.470  1.00  0.00      LIG  
ATOM   9546 H10  LIG     1      -5.406  22.366 -22.641  1.00  0.00      LIG  
ATOM   9547 H11  LIG     1      -4.377  24.983 -22.802  1.00  0.00      LIG  
ATOM   9548 H12  LIG     1      -3.876  24.176 -19.876  1.00  0.00      LIG  
ATOM   9549 H13  LIG     1      -4.010  19.935 -20.731  1.00  0.00      LIG  
ATOM   9550 H14  LIG     1      -3.508  21.198 -18.083  1.00  0.00      LIG  
TER
REMARK  Energy: 4.92243
REMARK  SimpleFitness: 4.92243
REMARK  FullFitness: -2632.3032
REMARK  InterFull: -27.6961
REMARK  IntraFull: 64.132
REMARK  solvFull: -3072.64
REMARK  surfFull: 403.901
REMARK  extraFull: 0.0
REMARK  deltaGcompsolvpol: -3072.64
REMARK  deltaGcompsolvnonpol: 403.901
REMARK  deltaGprotsolvpol: -3070.97
REMARK  deltaGprotsolvnonpol: 403.01
REMARK  deltaGligsolvpol: -19.5846
REMARK  deltaGligsolvnonpol: 6.77271
REMARK  deltaGvdw: -27.6961
REMARK  deltaGelec: 0.0
REMARK  deltaG: -6.0700836
REMARK  Cluster: 14
REMARK  ClusterRank: 0
ATOM   9521 C    LIG     1     -34.412  23.104 -52.960  1.00  0.00      LIG  
ATOM   9522 C1   LIG     1     -33.256  22.472 -53.672  1.00  0.00      LIG  
ATOM   9523 O    LIG     1     -32.608  23.071 -54.516  1.00  0.00      LIG  
ATOM   9524 N    LIG     1     -33.097  21.148 -53.337  1.00  0.00      LIG  
ATOM   9525 C2   LIG     1     -32.136  20.283 -54.009  1.00  0.00      LIG  
ATOM   9526 C3   LIG     1     -31.844  19.166 -53.040  1.00  0.00      LIG  
ATOM   9527 O1   LIG     1     -31.390  18.087 -53.391  1.00  0.00      LIG  
ATOM   9528 C4   LIG     1     -32.599  19.757 -55.387  1.00  0.00      LIG  
ATOM   9529 C5   LIG     1     -34.119  19.565 -55.535  1.00  0.00      LIG  
ATOM   9530 C6   LIG     1     -34.491  18.869 -56.849  1.00  0.00      LIG  
ATOM   9531 C7   LIG     1     -35.981  18.535 -56.901  1.00  0.00      LIG  
ATOM   9532 O2   LIG     1     -36.255  17.700 -58.021  1.00  0.00      LIG  
ATOM   9533 O3   LIG     1     -34.179  19.707 -57.962  1.00  0.00      LIG  
ATOM   9534 O4   LIG     1     -34.608  18.768 -54.464  1.00  0.00      LIG  
ATOM   9535 O5   LIG     1     -32.118  20.656 -56.383  1.00  0.00      LIG  
ATOM   9536 H    LIG     1     -34.202  24.167 -52.820  1.00  0.00      LIG  
ATOM   9537 H1   LIG     1     -34.564  22.645 -51.977  1.00  0.00      LIG  
ATOM   9538 H2   LIG     1     -35.316  22.980 -53.562  1.00  0.00      LIG  
ATOM   9539 H3   LIG     1     -33.689  20.761 -52.607  1.00  0.00      LIG  
ATOM   9540 H4   LIG     1     -31.209  20.857 -54.111  1.00  0.00      LIG  
ATOM   9541 H5   LIG     1     -31.732  19.473 -51.987  1.00  0.00      LIG  
ATOM   9542 H6   LIG     1     -32.116  18.798 -55.597  1.00  0.00      LIG  
ATOM   9543 H7   LIG     1     -34.620  20.538 -55.504  1.00  0.00      LIG  
ATOM   9544 H8   LIG     1     -33.912  17.947 -56.961  1.00  0.00      LIG  
ATOM   9545 H9   LIG     1     -36.579  19.445 -57.009  1.00  0.00      LIG  
ATOM   9546 H10  LIG     1     -36.317  17.999 -56.010  1.00  0.00      LIG  
ATOM   9547 H11  LIG     1     -35.725  16.893 -57.903  1.00  0.00      LIG  
ATOM   9548 H12  LIG     1     -34.663  19.336 -58.722  1.00  0.00      LIG  
ATOM   9549 H13  LIG     1     -34.409  19.245 -53.640  1.00  0.00      LIG  
ATOM   9550 H14  LIG     1     -32.638  20.473 -57.188  1.00  0.00      LIG  
TER
REMARK  Energy: 4.8808
REMARK  SimpleFitness: 4.8808
REMARK  FullFitness: -2632.0435
REMARK  InterFull: -27.5391
REMARK  IntraFull: 64.2469
REMARK  solvFull: -3072.59
REMARK  surfFull: 403.839
REMARK  extraFull: 0.0
REMARK  deltaGcompsolvpol: -3072.59
REMARK  deltaGcompsolvnonpol: 403.839
REMARK  deltaGprotsolvpol: -3070.97
REMARK  deltaGprotsolvnonpol: 403.01
REMARK  deltaGligsolvpol: -19.5269
REMARK  deltaGligsolvnonpol: 6.7819
REMARK  deltaGvdw: -27.5391
REMARK  deltaGelec: 0.0
REMARK  deltaG: -6.06245
REMARK  Cluster: 14
REMARK  ClusterRank: 1
ATOM   9521 C    LIG     1     -34.461  23.144 -52.996  1.00  0.00      LIG  
ATOM   9522 C1   LIG     1     -33.243  22.540 -53.625  1.00  0.00      LIG  
ATOM   9523 O    LIG     1     -32.584  23.135 -54.463  1.00  0.00      LIG  
ATOM   9524 N    LIG     1     -33.032  21.242 -53.220  1.00  0.00      LIG  
ATOM   9525 C2   LIG     1     -31.991  20.403 -53.798  1.00  0.00      LIG  
ATOM   9526 C3   LIG     1     -31.744  19.311 -52.789  1.00  0.00      LIG  
ATOM   9527 O1   LIG     1     -31.256  18.231 -53.086  1.00  0.00      LIG  
ATOM   9528 C4   LIG     1     -32.317  19.839 -55.200  1.00  0.00      LIG  
ATOM   9529 C5   LIG     1     -33.814  19.611 -55.479  1.00  0.00      LIG  
ATOM   9530 C6   LIG     1     -34.052  18.891 -56.811  1.00  0.00      LIG  
ATOM   9531 C7   LIG     1     -35.524  18.520 -56.989  1.00  0.00      LIG  
ATOM   9532 O2   LIG     1     -35.675  17.660 -58.114  1.00  0.00      LIG  
ATOM   9533 O3   LIG     1     -33.664  19.723 -57.904  1.00  0.00      LIG  
ATOM   9534 O4   LIG     1     -34.379  18.819 -54.441  1.00  0.00      LIG  
ATOM   9535 O5   LIG     1     -31.765  20.728 -56.168  1.00  0.00      LIG  
ATOM   9536 H    LIG     1     -34.284  24.211 -52.840  1.00  0.00      LIG  
ATOM   9537 H1   LIG     1     -34.675  22.681 -52.027  1.00  0.00      LIG  
ATOM   9538 H2   LIG     1     -35.317  23.002 -53.662  1.00  0.00      LIG  
ATOM   9539 H3   LIG     1     -33.643  20.854 -52.506  1.00  0.00      LIG  
ATOM   9540 H4   LIG     1     -31.079  21.009 -53.832  1.00  0.00      LIG  
ATOM   9541 H5   LIG     1     -31.710  19.641 -51.738  1.00  0.00      LIG  
ATOM   9542 H6   LIG     1     -31.798  18.888 -55.348  1.00  0.00      LIG  
ATOM   9543 H7   LIG     1     -34.335  20.573 -55.508  1.00  0.00      LIG  
ATOM   9544 H8   LIG     1     -33.443  17.983 -56.859  1.00  0.00      LIG  
ATOM   9545 H9   LIG     1     -36.130  19.413 -57.167  1.00  0.00      LIG  
ATOM   9546 H10  LIG     1     -35.925  17.990 -56.123  1.00  0.00      LIG  
ATOM   9547 H11  LIG     1     -35.133  16.873 -57.939  1.00  0.00      LIG  
ATOM   9548 H12  LIG     1     -34.071  19.333 -58.698  1.00  0.00      LIG  
ATOM   9549 H13  LIG     1     -34.250  19.306 -53.609  1.00  0.00      LIG  
ATOM   9550 H14  LIG     1     -32.212  20.525 -57.011  1.00  0.00      LIG  
TER
REMARK  Energy: 4.8808
REMARK  SimpleFitness: 4.8808
REMARK  FullFitness: -2632.0435
REMARK  InterFull: -27.5391
REMARK  IntraFull: 64.2469
REMARK  solvFull: -3072.59
REMARK  surfFull: 403.839
REMARK  extraFull: 0.0
REMARK  deltaGcompsolvpol: -3072.59
REMARK  deltaGcompsolvnonpol: 403.839
REMARK  deltaGprotsolvpol: -3070.97
REMARK  deltaGprotsolvnonpol: 403.01
REMARK  deltaGligsolvpol: -19.5269
REMARK  deltaGligsolvnonpol: 6.7819
REMARK  deltaGvdw: -27.5391
REMARK  deltaGelec: 0.0
REMARK  deltaG: -6.06245
REMARK  Cluster: 14
REMARK  ClusterRank: 2
ATOM   9521 C    LIG     1     -34.461  23.144 -52.996  1.00  0.00      LIG  
ATOM   9522 C1   LIG     1     -33.243  22.540 -53.625  1.00  0.00      LIG  
ATOM   9523 O    LIG     1     -32.584  23.135 -54.463  1.00  0.00      LIG  
ATOM   9524 N    LIG     1     -33.032  21.242 -53.220  1.00  0.00      LIG  
ATOM   9525 C2   LIG     1     -31.991  20.403 -53.798  1.00  0.00      LIG  
ATOM   9526 C3   LIG     1     -31.744  19.311 -52.789  1.00  0.00      LIG  
ATOM   9527 O1   LIG     1     -31.256  18.231 -53.086  1.00  0.00      LIG  
ATOM   9528 C4   LIG     1     -32.317  19.839 -55.200  1.00  0.00      LIG  
ATOM   9529 C5   LIG     1     -33.814  19.611 -55.479  1.00  0.00      LIG  
ATOM   9530 C6   LIG     1     -34.052  18.891 -56.811  1.00  0.00      LIG  
ATOM   9531 C7   LIG     1     -35.524  18.520 -56.989  1.00  0.00      LIG  
ATOM   9532 O2   LIG     1     -35.675  17.660 -58.114  1.00  0.00      LIG  
ATOM   9533 O3   LIG     1     -33.664  19.723 -57.904  1.00  0.00      LIG  
ATOM   9534 O4   LIG     1     -34.379  18.819 -54.441  1.00  0.00      LIG  
ATOM   9535 O5   LIG     1     -31.765  20.728 -56.168  1.00  0.00      LIG  
ATOM   9536 H    LIG     1     -34.284  24.211 -52.840  1.00  0.00      LIG  
ATOM   9537 H1   LIG     1     -34.675  22.681 -52.027  1.00  0.00      LIG  
ATOM   9538 H2   LIG     1     -35.317  23.002 -53.662  1.00  0.00      LIG  
ATOM   9539 H3   LIG     1     -33.643  20.854 -52.506  1.00  0.00      LIG  
ATOM   9540 H4   LIG     1     -31.079  21.009 -53.832  1.00  0.00      LIG  
ATOM   9541 H5   LIG     1     -31.710  19.641 -51.738  1.00  0.00      LIG  
ATOM   9542 H6   LIG     1     -31.798  18.888 -55.348  1.00  0.00      LIG  
ATOM   9543 H7   LIG     1     -34.335  20.573 -55.508  1.00  0.00      LIG  
ATOM   9544 H8   LIG     1     -33.443  17.983 -56.859  1.00  0.00      LIG  
ATOM   9545 H9   LIG     1     -36.130  19.413 -57.167  1.00  0.00      LIG  
ATOM   9546 H10  LIG     1     -35.925  17.990 -56.123  1.00  0.00      LIG  
ATOM   9547 H11  LIG     1     -35.133  16.873 -57.939  1.00  0.00      LIG  
ATOM   9548 H12  LIG     1     -34.071  19.333 -58.698  1.00  0.00      LIG  
ATOM   9549 H13  LIG     1     -34.250  19.306 -53.609  1.00  0.00      LIG  
ATOM   9550 H14  LIG     1     -32.212  20.525 -57.011  1.00  0.00      LIG  
TER
REMARK  Energy: 4.8808
REMARK  SimpleFitness: 4.8808
REMARK  FullFitness: -2632.0435
REMARK  InterFull: -27.5391
REMARK  IntraFull: 64.2469
REMARK  solvFull: -3072.59
REMARK  surfFull: 403.839
REMARK  extraFull: 0.0
REMARK  deltaGcompsolvpol: -3072.59
REMARK  deltaGcompsolvnonpol: 403.839
REMARK  deltaGprotsolvpol: -3070.97
REMARK  deltaGprotsolvnonpol: 403.01
REMARK  deltaGligsolvpol: -19.5269
REMARK  deltaGligsolvnonpol: 6.7819
REMARK  deltaGvdw: -27.5391
REMARK  deltaGelec: 0.0
REMARK  deltaG: -6.06245
REMARK  Cluster: 14
REMARK  ClusterRank: 3
ATOM   9521 C    LIG     1     -34.461  23.144 -52.996  1.00  0.00      LIG  
ATOM   9522 C1   LIG     1     -33.243  22.540 -53.625  1.00  0.00      LIG  
ATOM   9523 O    LIG     1     -32.584  23.135 -54.463  1.00  0.00      LIG  
ATOM   9524 N    LIG     1     -33.032  21.242 -53.220  1.00  0.00      LIG  
ATOM   9525 C2   LIG     1     -31.991  20.403 -53.798  1.00  0.00      LIG  
ATOM   9526 C3   LIG     1     -31.744  19.311 -52.789  1.00  0.00      LIG  
ATOM   9527 O1   LIG     1     -31.256  18.231 -53.086  1.00  0.00      LIG  
ATOM   9528 C4   LIG     1     -32.317  19.839 -55.200  1.00  0.00      LIG  
ATOM   9529 C5   LIG     1     -33.814  19.611 -55.479  1.00  0.00      LIG  
ATOM   9530 C6   LIG     1     -34.052  18.891 -56.811  1.00  0.00      LIG  
ATOM   9531 C7   LIG     1     -35.524  18.520 -56.989  1.00  0.00      LIG  
ATOM   9532 O2   LIG     1     -35.675  17.660 -58.114  1.00  0.00      LIG  
ATOM   9533 O3   LIG     1     -33.664  19.723 -57.904  1.00  0.00      LIG  
ATOM   9534 O4   LIG     1     -34.379  18.819 -54.441  1.00  0.00      LIG  
ATOM   9535 O5   LIG     1     -31.765  20.728 -56.168  1.00  0.00      LIG  
ATOM   9536 H    LIG     1     -34.284  24.211 -52.840  1.00  0.00      LIG  
ATOM   9537 H1   LIG     1     -34.675  22.681 -52.027  1.00  0.00      LIG  
ATOM   9538 H2   LIG     1     -35.317  23.002 -53.662  1.00  0.00      LIG  
ATOM   9539 H3   LIG     1     -33.643  20.854 -52.506  1.00  0.00      LIG  
ATOM   9540 H4   LIG     1     -31.079  21.009 -53.832  1.00  0.00      LIG  
ATOM   9541 H5   LIG     1     -31.710  19.641 -51.738  1.00  0.00      LIG  
ATOM   9542 H6   LIG     1     -31.798  18.888 -55.348  1.00  0.00      LIG  
ATOM   9543 H7   LIG     1     -34.335  20.573 -55.508  1.00  0.00      LIG  
ATOM   9544 H8   LIG     1     -33.443  17.983 -56.859  1.00  0.00      LIG  
ATOM   9545 H9   LIG     1     -36.130  19.413 -57.167  1.00  0.00      LIG  
ATOM   9546 H10  LIG     1     -35.925  17.990 -56.123  1.00  0.00      LIG  
ATOM   9547 H11  LIG     1     -35.133  16.873 -57.939  1.00  0.00      LIG  
ATOM   9548 H12  LIG     1     -34.071  19.333 -58.698  1.00  0.00      LIG  
ATOM   9549 H13  LIG     1     -34.250  19.306 -53.609  1.00  0.00      LIG  
ATOM   9550 H14  LIG     1     -32.212  20.525 -57.011  1.00  0.00      LIG  
TER
REMARK  Energy: 4.8808
REMARK  SimpleFitness: 4.8808
REMARK  FullFitness: -2632.0435
REMARK  InterFull: -27.5391
REMARK  IntraFull: 64.2469
REMARK  solvFull: -3072.59
REMARK  surfFull: 403.839
REMARK  extraFull: 0.0
REMARK  deltaGcompsolvpol: -3072.59
REMARK  deltaGcompsolvnonpol: 403.839
REMARK  deltaGprotsolvpol: -3070.97
REMARK  deltaGprotsolvnonpol: 403.01
REMARK  deltaGligsolvpol: -19.5269
REMARK  deltaGligsolvnonpol: 6.7819
REMARK  deltaGvdw: -27.5391
REMARK  deltaGelec: 0.0
REMARK  deltaG: -6.06245
REMARK  Cluster: 14
REMARK  ClusterRank: 4
ATOM   9521 C    LIG     1     -34.461  23.144 -52.996  1.00  0.00      LIG  
ATOM   9522 C1   LIG     1     -33.243  22.540 -53.625  1.00  0.00      LIG  
ATOM   9523 O    LIG     1     -32.584  23.135 -54.463  1.00  0.00      LIG  
ATOM   9524 N    LIG     1     -33.032  21.242 -53.220  1.00  0.00      LIG  
ATOM   9525 C2   LIG     1     -31.991  20.403 -53.798  1.00  0.00      LIG  
ATOM   9526 C3   LIG     1     -31.744  19.311 -52.789  1.00  0.00      LIG  
ATOM   9527 O1   LIG     1     -31.256  18.231 -53.086  1.00  0.00      LIG  
ATOM   9528 C4   LIG     1     -32.317  19.839 -55.200  1.00  0.00      LIG  
ATOM   9529 C5   LIG     1     -33.814  19.611 -55.479  1.00  0.00      LIG  
ATOM   9530 C6   LIG     1     -34.052  18.891 -56.811  1.00  0.00      LIG  
ATOM   9531 C7   LIG     1     -35.524  18.520 -56.989  1.00  0.00      LIG  
ATOM   9532 O2   LIG     1     -35.675  17.660 -58.114  1.00  0.00      LIG  
ATOM   9533 O3   LIG     1     -33.664  19.723 -57.904  1.00  0.00      LIG  
ATOM   9534 O4   LIG     1     -34.379  18.819 -54.441  1.00  0.00      LIG  
ATOM   9535 O5   LIG     1     -31.765  20.728 -56.168  1.00  0.00      LIG  
ATOM   9536 H    LIG     1     -34.284  24.211 -52.840  1.00  0.00      LIG  
ATOM   9537 H1   LIG     1     -34.675  22.681 -52.027  1.00  0.00      LIG  
ATOM   9538 H2   LIG     1     -35.317  23.002 -53.662  1.00  0.00      LIG  
ATOM   9539 H3   LIG     1     -33.643  20.854 -52.506  1.00  0.00      LIG  
ATOM   9540 H4   LIG     1     -31.079  21.009 -53.832  1.00  0.00      LIG  
ATOM   9541 H5   LIG     1     -31.710  19.641 -51.738  1.00  0.00      LIG  
ATOM   9542 H6   LIG     1     -31.798  18.888 -55.348  1.00  0.00      LIG  
ATOM   9543 H7   LIG     1     -34.335  20.573 -55.508  1.00  0.00      LIG  
ATOM   9544 H8   LIG     1     -33.443  17.983 -56.859  1.00  0.00      LIG  
ATOM   9545 H9   LIG     1     -36.130  19.413 -57.167  1.00  0.00      LIG  
ATOM   9546 H10  LIG     1     -35.925  17.990 -56.123  1.00  0.00      LIG  
ATOM   9547 H11  LIG     1     -35.133  16.873 -57.939  1.00  0.00      LIG  
ATOM   9548 H12  LIG     1     -34.071  19.333 -58.698  1.00  0.00      LIG  
ATOM   9549 H13  LIG     1     -34.250  19.306 -53.609  1.00  0.00      LIG  
ATOM   9550 H14  LIG     1     -32.212  20.525 -57.011  1.00  0.00      LIG  
TER
REMARK  Energy: 4.8808
REMARK  SimpleFitness: 4.8808
REMARK  FullFitness: -2632.0435
REMARK  InterFull: -27.5391
REMARK  IntraFull: 64.2469
REMARK  solvFull: -3072.59
REMARK  surfFull: 403.839
REMARK  extraFull: 0.0
REMARK  deltaGcompsolvpol: -3072.59
REMARK  deltaGcompsolvnonpol: 403.839
REMARK  deltaGprotsolvpol: -3070.97
REMARK  deltaGprotsolvnonpol: 403.01
REMARK  deltaGligsolvpol: -19.5269
REMARK  deltaGligsolvnonpol: 6.7819
REMARK  deltaGvdw: -27.5391
REMARK  deltaGelec: 0.0
REMARK  deltaG: -6.06245
REMARK  Cluster: 14
REMARK  ClusterRank: 5
ATOM   9521 C    LIG     1     -34.461  23.144 -52.996  1.00  0.00      LIG  
ATOM   9522 C1   LIG     1     -33.243  22.540 -53.625  1.00  0.00      LIG  
ATOM   9523 O    LIG     1     -32.584  23.135 -54.463  1.00  0.00      LIG  
ATOM   9524 N    LIG     1     -33.032  21.242 -53.220  1.00  0.00      LIG  
ATOM   9525 C2   LIG     1     -31.991  20.403 -53.798  1.00  0.00      LIG  
ATOM   9526 C3   LIG     1     -31.744  19.311 -52.789  1.00  0.00      LIG  
ATOM   9527 O1   LIG     1     -31.256  18.231 -53.086  1.00  0.00      LIG  
ATOM   9528 C4   LIG     1     -32.317  19.839 -55.200  1.00  0.00      LIG  
ATOM   9529 C5   LIG     1     -33.814  19.611 -55.479  1.00  0.00      LIG  
ATOM   9530 C6   LIG     1     -34.052  18.891 -56.811  1.00  0.00      LIG  
ATOM   9531 C7   LIG     1     -35.524  18.520 -56.989  1.00  0.00      LIG  
ATOM   9532 O2   LIG     1     -35.675  17.660 -58.114  1.00  0.00      LIG  
ATOM   9533 O3   LIG     1     -33.664  19.723 -57.904  1.00  0.00      LIG  
ATOM   9534 O4   LIG     1     -34.379  18.819 -54.441  1.00  0.00      LIG  
ATOM   9535 O5   LIG     1     -31.765  20.728 -56.168  1.00  0.00      LIG  
ATOM   9536 H    LIG     1     -34.284  24.211 -52.840  1.00  0.00      LIG  
ATOM   9537 H1   LIG     1     -34.675  22.681 -52.027  1.00  0.00      LIG  
ATOM   9538 H2   LIG     1     -35.317  23.002 -53.662  1.00  0.00      LIG  
ATOM   9539 H3   LIG     1     -33.643  20.854 -52.506  1.00  0.00      LIG  
ATOM   9540 H4   LIG     1     -31.079  21.009 -53.832  1.00  0.00      LIG  
ATOM   9541 H5   LIG     1     -31.710  19.641 -51.738  1.00  0.00      LIG  
ATOM   9542 H6   LIG     1     -31.798  18.888 -55.348  1.00  0.00      LIG  
ATOM   9543 H7   LIG     1     -34.335  20.573 -55.508  1.00  0.00      LIG  
ATOM   9544 H8   LIG     1     -33.443  17.983 -56.859  1.00  0.00      LIG  
ATOM   9545 H9   LIG     1     -36.130  19.413 -57.167  1.00  0.00      LIG  
ATOM   9546 H10  LIG     1     -35.925  17.990 -56.123  1.00  0.00      LIG  
ATOM   9547 H11  LIG     1     -35.133  16.873 -57.939  1.00  0.00      LIG  
ATOM   9548 H12  LIG     1     -34.071  19.333 -58.698  1.00  0.00      LIG  
ATOM   9549 H13  LIG     1     -34.250  19.306 -53.609  1.00  0.00      LIG  
ATOM   9550 H14  LIG     1     -32.212  20.525 -57.011  1.00  0.00      LIG  
TER
REMARK  Energy: 7.4298
REMARK  SimpleFitness: 7.4298
REMARK  FullFitness: -2630.0356
REMARK  InterFull: -25.5276
REMARK  IntraFull: 65.916
REMARK  solvFull: -3074.24
REMARK  surfFull: 403.816
REMARK  extraFull: 0.0
REMARK  deltaGcompsolvpol: -3074.24
REMARK  deltaGcompsolvnonpol: 403.816
REMARK  deltaGprotsolvpol: -3070.97
REMARK  deltaGprotsolvnonpol: 403.01
REMARK  deltaGligsolvpol: -20.5052
REMARK  deltaGligsolvnonpol: 6.79939
REMARK  deltaGvdw: -25.5276
REMARK  deltaGelec: 0.0
REMARK  deltaG: -5.9170923
REMARK  Cluster: 14
REMARK  ClusterRank: 6
ATOM   9521 C    LIG     1     -34.579  23.242 -52.978  1.00  0.00      LIG  
ATOM   9522 C1   LIG     1     -33.402  22.735 -53.750  1.00  0.00      LIG  
ATOM   9523 O    LIG     1     -32.866  23.400 -54.623  1.00  0.00      LIG  
ATOM   9524 N    LIG     1     -33.071  21.441 -53.423  1.00  0.00      LIG  
ATOM   9525 C2   LIG     1     -32.055  20.705 -54.165  1.00  0.00      LIG  
ATOM   9526 C3   LIG     1     -31.498  19.654 -53.240  1.00  0.00      LIG  
ATOM   9527 O1   LIG     1     -30.515  18.993 -53.540  1.00  0.00      LIG  
ATOM   9528 C4   LIG     1     -32.574  20.075 -55.478  1.00  0.00      LIG  
ATOM   9529 C5   LIG     1     -34.055  19.657 -55.458  1.00  0.00      LIG  
ATOM   9530 C6   LIG     1     -34.472  18.905 -56.726  1.00  0.00      LIG  
ATOM   9531 C7   LIG     1     -35.895  18.359 -56.604  1.00  0.00      LIG  
ATOM   9532 O2   LIG     1     -36.170  17.472 -57.684  1.00  0.00      LIG  
ATOM   9533 O3   LIG     1     -34.422  19.769 -57.861  1.00  0.00      LIG  
ATOM   9534 O4   LIG     1     -34.286  18.801 -54.347  1.00  0.00      LIG  
ATOM   9535 O5   LIG     1     -32.337  21.003 -56.534  1.00  0.00      LIG  
ATOM   9536 H    LIG     1     -34.429  24.303 -52.766  1.00  0.00      LIG  
ATOM   9537 H1   LIG     1     -34.688  22.707 -52.028  1.00  0.00      LIG  
ATOM   9538 H2   LIG     1     -35.484  23.107 -53.576  1.00  0.00      LIG  
ATOM   9539 H3   LIG     1     -33.582  20.984 -52.673  1.00  0.00      LIG  
ATOM   9540 H4   LIG     1     -31.233  21.397 -54.380  1.00  0.00      LIG  
ATOM   9541 H5   LIG     1     -32.185  19.272 -52.470  1.00  0.00      LIG  
ATOM   9542 H6   LIG     1     -31.975  19.190 -55.716  1.00  0.00      LIG  
ATOM   9543 H7   LIG     1     -34.691  20.542 -55.358  1.00  0.00      LIG  
ATOM   9544 H8   LIG     1     -33.783  18.076 -56.914  1.00  0.00      LIG  
ATOM   9545 H9   LIG     1     -36.628  19.170 -56.643  1.00  0.00      LIG  
ATOM   9546 H10  LIG     1     -36.045  17.796 -55.680  1.00  0.00      LIG  
ATOM   9547 H11  LIG     1     -35.517  16.754 -57.628  1.00  0.00      LIG  
ATOM   9548 H12  LIG     1     -34.932  19.326 -58.561  1.00  0.00      LIG  
ATOM   9549 H13  LIG     1     -34.188  19.340 -53.544  1.00  0.00      LIG  
ATOM   9550 H14  LIG     1     -32.916  20.732 -57.270  1.00  0.00      LIG  
TER
REMARK  Energy: 7.4298
REMARK  SimpleFitness: 7.4298
REMARK  FullFitness: -2630.0356
REMARK  InterFull: -25.5276
REMARK  IntraFull: 65.916
REMARK  solvFull: -3074.24
REMARK  surfFull: 403.816
REMARK  extraFull: 0.0
REMARK  deltaGcompsolvpol: -3074.24
REMARK  deltaGcompsolvnonpol: 403.816
REMARK  deltaGprotsolvpol: -3070.97
REMARK  deltaGprotsolvnonpol: 403.01
REMARK  deltaGligsolvpol: -20.5052
REMARK  deltaGligsolvnonpol: 6.79939
REMARK  deltaGvdw: -25.5276
REMARK  deltaGelec: 0.0
REMARK  deltaG: -5.9170923
REMARK  Cluster: 14
REMARK  ClusterRank: 7
ATOM   9521 C    LIG     1     -34.579  23.242 -52.978  1.00  0.00      LIG  
ATOM   9522 C1   LIG     1     -33.402  22.735 -53.750  1.00  0.00      LIG  
ATOM   9523 O    LIG     1     -32.866  23.400 -54.623  1.00  0.00      LIG  
ATOM   9524 N    LIG     1     -33.071  21.441 -53.423  1.00  0.00      LIG  
ATOM   9525 C2   LIG     1     -32.055  20.705 -54.165  1.00  0.00      LIG  
ATOM   9526 C3   LIG     1     -31.498  19.654 -53.240  1.00  0.00      LIG  
ATOM   9527 O1   LIG     1     -30.515  18.993 -53.540  1.00  0.00      LIG  
ATOM   9528 C4   LIG     1     -32.574  20.075 -55.478  1.00  0.00      LIG  
ATOM   9529 C5   LIG     1     -34.055  19.657 -55.458  1.00  0.00      LIG  
ATOM   9530 C6   LIG     1     -34.472  18.905 -56.726  1.00  0.00      LIG  
ATOM   9531 C7   LIG     1     -35.895  18.359 -56.604  1.00  0.00      LIG  
ATOM   9532 O2   LIG     1     -36.170  17.472 -57.684  1.00  0.00      LIG  
ATOM   9533 O3   LIG     1     -34.422  19.769 -57.861  1.00  0.00      LIG  
ATOM   9534 O4   LIG     1     -34.286  18.801 -54.347  1.00  0.00      LIG  
ATOM   9535 O5   LIG     1     -32.337  21.003 -56.534  1.00  0.00      LIG  
ATOM   9536 H    LIG     1     -34.429  24.303 -52.766  1.00  0.00      LIG  
ATOM   9537 H1   LIG     1     -34.688  22.707 -52.028  1.00  0.00      LIG  
ATOM   9538 H2   LIG     1     -35.484  23.107 -53.576  1.00  0.00      LIG  
ATOM   9539 H3   LIG     1     -33.582  20.984 -52.673  1.00  0.00      LIG  
ATOM   9540 H4   LIG     1     -31.233  21.397 -54.380  1.00  0.00      LIG  
ATOM   9541 H5   LIG     1     -32.185  19.272 -52.470  1.00  0.00      LIG  
ATOM   9542 H6   LIG     1     -31.975  19.190 -55.716  1.00  0.00      LIG  
ATOM   9543 H7   LIG     1     -34.691  20.542 -55.358  1.00  0.00      LIG  
ATOM   9544 H8   LIG     1     -33.783  18.076 -56.914  1.00  0.00      LIG  
ATOM   9545 H9   LIG     1     -36.628  19.170 -56.643  1.00  0.00      LIG  
ATOM   9546 H10  LIG     1     -36.045  17.796 -55.680  1.00  0.00      LIG  
ATOM   9547 H11  LIG     1     -35.517  16.754 -57.628  1.00  0.00      LIG  
ATOM   9548 H12  LIG     1     -34.932  19.326 -58.561  1.00  0.00      LIG  
ATOM   9549 H13  LIG     1     -34.188  19.340 -53.544  1.00  0.00      LIG  
ATOM   9550 H14  LIG     1     -32.916  20.732 -57.270  1.00  0.00      LIG  
TER
REMARK  Energy: 5.45748
REMARK  SimpleFitness: 5.45748
REMARK  FullFitness: -2632.2676
REMARK  InterFull: -30.2503
REMARK  IntraFull: 62.1866
REMARK  solvFull: -3066.38
REMARK  surfFull: 402.176
REMARK  extraFull: 0.0
REMARK  deltaGcompsolvpol: -3066.38
REMARK  deltaGcompsolvnonpol: 402.176
REMARK  deltaGprotsolvpol: -3070.97
REMARK  deltaGprotsolvnonpol: 403.01
REMARK  deltaGligsolvpol: -16.9376
REMARK  deltaGligsolvnonpol: 6.66983
REMARK  deltaGvdw: -30.2503
REMARK  deltaGelec: 0.0
REMARK  deltaG: -6.2440476
REMARK  Cluster: 15
REMARK  ClusterRank: 0
ATOM   9521 C    LIG     1      -3.139  25.647 -24.080  1.00  0.00      LIG  
ATOM   9522 C1   LIG     1      -2.717  24.412 -23.345  1.00  0.00      LIG  
ATOM   9523 O    LIG     1      -3.208  23.316 -23.572  1.00  0.00      LIG  
ATOM   9524 N    LIG     1      -1.727  24.655 -22.425  1.00  0.00      LIG  
ATOM   9525 C2   LIG     1      -1.224  23.624 -21.534  1.00  0.00      LIG  
ATOM   9526 C3   LIG     1       0.186  24.061 -21.199  1.00  0.00      LIG  
ATOM   9527 O1   LIG     1       0.583  25.219 -21.249  1.00  0.00      LIG  
ATOM   9528 C4   LIG     1      -2.155  23.430 -20.316  1.00  0.00      LIG  
ATOM   9529 C5   LIG     1      -1.889  22.163 -19.488  1.00  0.00      LIG  
ATOM   9530 C6   LIG     1      -2.195  20.877 -20.251  1.00  0.00      LIG  
ATOM   9531 C7   LIG     1      -2.021  19.653 -19.362  1.00  0.00      LIG  
ATOM   9532 O2   LIG     1      -2.764  19.788 -18.155  1.00  0.00      LIG  
ATOM   9533 O3   LIG     1      -3.531  20.903 -20.753  1.00  0.00      LIG  
ATOM   9534 O4   LIG     1      -0.543  22.117 -19.020  1.00  0.00      LIG  
ATOM   9535 O5   LIG     1      -2.127  24.565 -19.442  1.00  0.00      LIG  
ATOM   9536 H    LIG     1      -4.211  25.797 -23.927  1.00  0.00      LIG  
ATOM   9537 H1   LIG     1      -2.930  25.511 -25.145  1.00  0.00      LIG  
ATOM   9538 H2   LIG     1      -2.606  26.535 -23.725  1.00  0.00      LIG  
ATOM   9539 H3   LIG     1      -1.404  25.606 -22.285  1.00  0.00      LIG  
ATOM   9540 H4   LIG     1      -1.159  22.698 -22.112  1.00  0.00      LIG  
ATOM   9541 H5   LIG     1       0.844  23.269 -20.813  1.00  0.00      LIG  
ATOM   9542 H6   LIG     1      -3.184  23.380 -20.681  1.00  0.00      LIG  
ATOM   9543 H7   LIG     1      -2.517  22.211 -18.596  1.00  0.00      LIG  
ATOM   9544 H8   LIG     1      -1.521  20.773 -21.106  1.00  0.00      LIG  
ATOM   9545 H9   LIG     1      -0.971  19.528 -19.099  1.00  0.00      LIG  
ATOM   9546 H10  LIG     1      -2.371  18.748 -19.865  1.00  0.00      LIG  
ATOM   9547 H11  LIG     1      -3.660  20.061 -18.418  1.00  0.00      LIG  
ATOM   9548 H12  LIG     1      -3.696  20.020 -21.135  1.00  0.00      LIG  
ATOM   9549 H13  LIG     1      -0.390  22.956 -18.551  1.00  0.00      LIG  
ATOM   9550 H14  LIG     1      -2.815  24.406 -18.771  1.00  0.00      LIG  
TER
REMARK  Energy: 5.45748
REMARK  SimpleFitness: 5.45748
REMARK  FullFitness: -2632.2676
REMARK  InterFull: -30.2503
REMARK  IntraFull: 62.1866
REMARK  solvFull: -3066.38
REMARK  surfFull: 402.176
REMARK  extraFull: 0.0
REMARK  deltaGcompsolvpol: -3066.38
REMARK  deltaGcompsolvnonpol: 402.176
REMARK  deltaGprotsolvpol: -3070.97
REMARK  deltaGprotsolvnonpol: 403.01
REMARK  deltaGligsolvpol: -16.9376
REMARK  deltaGligsolvnonpol: 6.66983
REMARK  deltaGvdw: -30.2503
REMARK  deltaGelec: 0.0
REMARK  deltaG: -6.2440476
REMARK  Cluster: 15
REMARK  ClusterRank: 1
ATOM   9521 C    LIG     1      -3.139  25.647 -24.080  1.00  0.00      LIG  
ATOM   9522 C1   LIG     1      -2.717  24.412 -23.345  1.00  0.00      LIG  
ATOM   9523 O    LIG     1      -3.208  23.316 -23.572  1.00  0.00      LIG  
ATOM   9524 N    LIG     1      -1.727  24.655 -22.425  1.00  0.00      LIG  
ATOM   9525 C2   LIG     1      -1.224  23.624 -21.534  1.00  0.00      LIG  
ATOM   9526 C3   LIG     1       0.186  24.061 -21.199  1.00  0.00      LIG  
ATOM   9527 O1   LIG     1       0.583  25.219 -21.249  1.00  0.00      LIG  
ATOM   9528 C4   LIG     1      -2.155  23.430 -20.316  1.00  0.00      LIG  
ATOM   9529 C5   LIG     1      -1.889  22.163 -19.488  1.00  0.00      LIG  
ATOM   9530 C6   LIG     1      -2.195  20.877 -20.251  1.00  0.00      LIG  
ATOM   9531 C7   LIG     1      -2.021  19.653 -19.362  1.00  0.00      LIG  
ATOM   9532 O2   LIG     1      -2.764  19.788 -18.155  1.00  0.00      LIG  
ATOM   9533 O3   LIG     1      -3.531  20.903 -20.753  1.00  0.00      LIG  
ATOM   9534 O4   LIG     1      -0.543  22.117 -19.020  1.00  0.00      LIG  
ATOM   9535 O5   LIG     1      -2.127  24.565 -19.442  1.00  0.00      LIG  
ATOM   9536 H    LIG     1      -4.211  25.797 -23.927  1.00  0.00      LIG  
ATOM   9537 H1   LIG     1      -2.930  25.511 -25.145  1.00  0.00      LIG  
ATOM   9538 H2   LIG     1      -2.606  26.535 -23.725  1.00  0.00      LIG  
ATOM   9539 H3   LIG     1      -1.404  25.606 -22.285  1.00  0.00      LIG  
ATOM   9540 H4   LIG     1      -1.159  22.698 -22.112  1.00  0.00      LIG  
ATOM   9541 H5   LIG     1       0.844  23.269 -20.813  1.00  0.00      LIG  
ATOM   9542 H6   LIG     1      -3.184  23.380 -20.681  1.00  0.00      LIG  
ATOM   9543 H7   LIG     1      -2.517  22.211 -18.596  1.00  0.00      LIG  
ATOM   9544 H8   LIG     1      -1.521  20.773 -21.106  1.00  0.00      LIG  
ATOM   9545 H9   LIG     1      -0.971  19.528 -19.099  1.00  0.00      LIG  
ATOM   9546 H10  LIG     1      -2.371  18.748 -19.865  1.00  0.00      LIG  
ATOM   9547 H11  LIG     1      -3.660  20.061 -18.418  1.00  0.00      LIG  
ATOM   9548 H12  LIG     1      -3.696  20.020 -21.135  1.00  0.00      LIG  
ATOM   9549 H13  LIG     1      -0.390  22.956 -18.551  1.00  0.00      LIG  
ATOM   9550 H14  LIG     1      -2.815  24.406 -18.771  1.00  0.00      LIG  
TER
REMARK  Energy: 5.45748
REMARK  SimpleFitness: 5.45748
REMARK  FullFitness: -2632.2676
REMARK  InterFull: -30.2503
REMARK  IntraFull: 62.1866
REMARK  solvFull: -3066.38
REMARK  surfFull: 402.176
REMARK  extraFull: 0.0
REMARK  deltaGcompsolvpol: -3066.38
REMARK  deltaGcompsolvnonpol: 402.176
REMARK  deltaGprotsolvpol: -3070.97
REMARK  deltaGprotsolvnonpol: 403.01
REMARK  deltaGligsolvpol: -16.9376
REMARK  deltaGligsolvnonpol: 6.66983
REMARK  deltaGvdw: -30.2503
REMARK  deltaGelec: 0.0
REMARK  deltaG: -6.2440476
REMARK  Cluster: 15
REMARK  ClusterRank: 2
ATOM   9521 C    LIG     1      -3.139  25.647 -24.080  1.00  0.00      LIG  
ATOM   9522 C1   LIG     1      -2.717  24.412 -23.345  1.00  0.00      LIG  
ATOM   9523 O    LIG     1      -3.208  23.316 -23.572  1.00  0.00      LIG  
ATOM   9524 N    LIG     1      -1.727  24.655 -22.425  1.00  0.00      LIG  
ATOM   9525 C2   LIG     1      -1.224  23.624 -21.534  1.00  0.00      LIG  
ATOM   9526 C3   LIG     1       0.186  24.061 -21.199  1.00  0.00      LIG  
ATOM   9527 O1   LIG     1       0.583  25.219 -21.249  1.00  0.00      LIG  
ATOM   9528 C4   LIG     1      -2.155  23.430 -20.316  1.00  0.00      LIG  
ATOM   9529 C5   LIG     1      -1.889  22.163 -19.488  1.00  0.00      LIG  
ATOM   9530 C6   LIG     1      -2.195  20.877 -20.251  1.00  0.00      LIG  
ATOM   9531 C7   LIG     1      -2.021  19.653 -19.362  1.00  0.00      LIG  
ATOM   9532 O2   LIG     1      -2.764  19.788 -18.155  1.00  0.00      LIG  
ATOM   9533 O3   LIG     1      -3.531  20.903 -20.753  1.00  0.00      LIG  
ATOM   9534 O4   LIG     1      -0.543  22.117 -19.020  1.00  0.00      LIG  
ATOM   9535 O5   LIG     1      -2.127  24.565 -19.442  1.00  0.00      LIG  
ATOM   9536 H    LIG     1      -4.211  25.797 -23.927  1.00  0.00      LIG  
ATOM   9537 H1   LIG     1      -2.930  25.511 -25.145  1.00  0.00      LIG  
ATOM   9538 H2   LIG     1      -2.606  26.535 -23.725  1.00  0.00      LIG  
ATOM   9539 H3   LIG     1      -1.404  25.606 -22.285  1.00  0.00      LIG  
ATOM   9540 H4   LIG     1      -1.159  22.698 -22.112  1.00  0.00      LIG  
ATOM   9541 H5   LIG     1       0.844  23.269 -20.813  1.00  0.00      LIG  
ATOM   9542 H6   LIG     1      -3.184  23.380 -20.681  1.00  0.00      LIG  
ATOM   9543 H7   LIG     1      -2.517  22.211 -18.596  1.00  0.00      LIG  
ATOM   9544 H8   LIG     1      -1.521  20.773 -21.106  1.00  0.00      LIG  
ATOM   9545 H9   LIG     1      -0.971  19.528 -19.099  1.00  0.00      LIG  
ATOM   9546 H10  LIG     1      -2.371  18.748 -19.865  1.00  0.00      LIG  
ATOM   9547 H11  LIG     1      -3.660  20.061 -18.418  1.00  0.00      LIG  
ATOM   9548 H12  LIG     1      -3.696  20.020 -21.135  1.00  0.00      LIG  
ATOM   9549 H13  LIG     1      -0.390  22.956 -18.551  1.00  0.00      LIG  
ATOM   9550 H14  LIG     1      -2.815  24.406 -18.771  1.00  0.00      LIG  
TER
REMARK  Energy: 5.49565
REMARK  SimpleFitness: 5.49565
REMARK  FullFitness: -2631.6016
REMARK  InterFull: -29.9777
REMARK  IntraFull: 62.3152
REMARK  solvFull: -3066.15
REMARK  surfFull: 402.211
REMARK  extraFull: 0.0
REMARK  deltaGcompsolvpol: -3066.15
REMARK  deltaGcompsolvnonpol: 402.211
REMARK  deltaGprotsolvpol: -3070.97
REMARK  deltaGprotsolvnonpol: 403.01
REMARK  deltaGligsolvpol: -16.9376
REMARK  deltaGligsolvnonpol: 6.66806
REMARK  deltaGvdw: -29.9777
REMARK  deltaGelec: 0.0
REMARK  deltaG: -6.200706
REMARK  Cluster: 15
REMARK  ClusterRank: 3
ATOM   9521 C    LIG     1      -3.120  25.626 -24.109  1.00  0.00      LIG  
ATOM   9522 C1   LIG     1      -2.755  24.367 -23.381  1.00  0.00      LIG  
ATOM   9523 O    LIG     1      -3.326  23.307 -23.583  1.00  0.00      LIG  
ATOM   9524 N    LIG     1      -1.705  24.539 -22.513  1.00  0.00      LIG  
ATOM   9525 C2   LIG     1      -1.245  23.479 -21.634  1.00  0.00      LIG  
ATOM   9526 C3   LIG     1       0.217  23.783 -21.392  1.00  0.00      LIG  
ATOM   9527 O1   LIG     1       0.712  24.900 -21.458  1.00  0.00      LIG  
ATOM   9528 C4   LIG     1      -2.114  23.384 -20.360  1.00  0.00      LIG  
ATOM   9529 C5   LIG     1      -1.887  22.131 -19.501  1.00  0.00      LIG  
ATOM   9530 C6   LIG     1      -2.298  20.838 -20.205  1.00  0.00      LIG  
ATOM   9531 C7   LIG     1      -2.195  19.644 -19.264  1.00  0.00      LIG  
ATOM   9532 O2   LIG     1      -2.883  19.896 -18.044  1.00  0.00      LIG  
ATOM   9533 O3   LIG     1      -3.637  20.938 -20.688  1.00  0.00      LIG  
ATOM   9534 O4   LIG     1      -0.527  22.018 -19.087  1.00  0.00      LIG  
ATOM   9535 O5   LIG     1      -1.963  24.541 -19.528  1.00  0.00      LIG  
ATOM   9536 H    LIG     1      -4.190  25.805 -23.981  1.00  0.00      LIG  
ATOM   9537 H1   LIG     1      -2.889  25.500 -25.170  1.00  0.00      LIG  
ATOM   9538 H2   LIG     1      -2.572  26.492 -23.725  1.00  0.00      LIG  
ATOM   9539 H3   LIG     1      -1.312  25.468 -22.389  1.00  0.00      LIG  
ATOM   9540 H4   LIG     1      -1.299  22.542 -22.196  1.00  0.00      LIG  
ATOM   9541 H5   LIG     1       0.823  22.928 -21.056  1.00  0.00      LIG  
ATOM   9542 H6   LIG     1      -3.164  23.394 -20.667  1.00  0.00      LIG  
ATOM   9543 H7   LIG     1      -2.471  22.251 -18.587  1.00  0.00      LIG  
ATOM   9544 H8   LIG     1      -1.650  20.653 -21.065  1.00  0.00      LIG  
ATOM   9545 H9   LIG     1      -1.151  19.440 -19.025  1.00  0.00      LIG  
ATOM   9546 H10  LIG     1      -2.636  18.750 -19.714  1.00  0.00      LIG  
ATOM   9547 H11  LIG     1      -3.749  20.262 -18.292  1.00  0.00      LIG  
ATOM   9548 H12  LIG     1      -3.849  20.071 -21.082  1.00  0.00      LIG  
ATOM   9549 H13  LIG     1      -0.297  22.867 -18.671  1.00  0.00      LIG  
ATOM   9550 H14  LIG     1      -2.616  24.448 -18.811  1.00  0.00      LIG  
TER
REMARK  Energy: 5.49565
REMARK  SimpleFitness: 5.49565
REMARK  FullFitness: -2631.6016
REMARK  InterFull: -29.9777
REMARK  IntraFull: 62.3152
REMARK  solvFull: -3066.15
REMARK  surfFull: 402.211
REMARK  extraFull: 0.0
REMARK  deltaGcompsolvpol: -3066.15
REMARK  deltaGcompsolvnonpol: 402.211
REMARK  deltaGprotsolvpol: -3070.97
REMARK  deltaGprotsolvnonpol: 403.01
REMARK  deltaGligsolvpol: -16.9376
REMARK  deltaGligsolvnonpol: 6.66806
REMARK  deltaGvdw: -29.9777
REMARK  deltaGelec: 0.0
REMARK  deltaG: -6.200706
REMARK  Cluster: 15
REMARK  ClusterRank: 4
ATOM   9521 C    LIG     1      -3.120  25.626 -24.109  1.00  0.00      LIG  
ATOM   9522 C1   LIG     1      -2.755  24.367 -23.381  1.00  0.00      LIG  
ATOM   9523 O    LIG     1      -3.326  23.307 -23.583  1.00  0.00      LIG  
ATOM   9524 N    LIG     1      -1.705  24.539 -22.513  1.00  0.00      LIG  
ATOM   9525 C2   LIG     1      -1.245  23.479 -21.634  1.00  0.00      LIG  
ATOM   9526 C3   LIG     1       0.217  23.783 -21.392  1.00  0.00      LIG  
ATOM   9527 O1   LIG     1       0.712  24.900 -21.458  1.00  0.00      LIG  
ATOM   9528 C4   LIG     1      -2.114  23.384 -20.360  1.00  0.00      LIG  
ATOM   9529 C5   LIG     1      -1.887  22.131 -19.501  1.00  0.00      LIG  
ATOM   9530 C6   LIG     1      -2.298  20.838 -20.205  1.00  0.00      LIG  
ATOM   9531 C7   LIG     1      -2.195  19.644 -19.264  1.00  0.00      LIG  
ATOM   9532 O2   LIG     1      -2.883  19.896 -18.044  1.00  0.00      LIG  
ATOM   9533 O3   LIG     1      -3.637  20.938 -20.688  1.00  0.00      LIG  
ATOM   9534 O4   LIG     1      -0.527  22.018 -19.087  1.00  0.00      LIG  
ATOM   9535 O5   LIG     1      -1.963  24.541 -19.528  1.00  0.00      LIG  
ATOM   9536 H    LIG     1      -4.190  25.805 -23.981  1.00  0.00      LIG  
ATOM   9537 H1   LIG     1      -2.889  25.500 -25.170  1.00  0.00      LIG  
ATOM   9538 H2   LIG     1      -2.572  26.492 -23.725  1.00  0.00      LIG  
ATOM   9539 H3   LIG     1      -1.312  25.468 -22.389  1.00  0.00      LIG  
ATOM   9540 H4   LIG     1      -1.299  22.542 -22.196  1.00  0.00      LIG  
ATOM   9541 H5   LIG     1       0.823  22.928 -21.056  1.00  0.00      LIG  
ATOM   9542 H6   LIG     1      -3.164  23.394 -20.667  1.00  0.00      LIG  
ATOM   9543 H7   LIG     1      -2.471  22.251 -18.587  1.00  0.00      LIG  
ATOM   9544 H8   LIG     1      -1.650  20.653 -21.065  1.00  0.00      LIG  
ATOM   9545 H9   LIG     1      -1.151  19.440 -19.025  1.00  0.00      LIG  
ATOM   9546 H10  LIG     1      -2.636  18.750 -19.714  1.00  0.00      LIG  
ATOM   9547 H11  LIG     1      -3.749  20.262 -18.292  1.00  0.00      LIG  
ATOM   9548 H12  LIG     1      -3.849  20.071 -21.082  1.00  0.00      LIG  
ATOM   9549 H13  LIG     1      -0.297  22.867 -18.671  1.00  0.00      LIG  
ATOM   9550 H14  LIG     1      -2.616  24.448 -18.811  1.00  0.00      LIG  
TER
REMARK  Energy: 5.79148
REMARK  SimpleFitness: 5.79148
REMARK  FullFitness: -2631.357
REMARK  InterFull: -31.9142
REMARK  IntraFull: 63.4974
REMARK  solvFull: -3065.06
REMARK  surfFull: 402.12
REMARK  extraFull: 0.0
REMARK  deltaGcompsolvpol: -3065.06
REMARK  deltaGcompsolvnonpol: 402.12
REMARK  deltaGprotsolvpol: -3070.97
REMARK  deltaGprotsolvnonpol: 403.01
REMARK  deltaGligsolvpol: -17.3526
REMARK  deltaGligsolvnonpol: 6.65942
REMARK  deltaGvdw: -31.9142
REMARK  deltaGelec: 0.0
REMARK  deltaG: -6.299594
REMARK  Cluster: 15
REMARK  ClusterRank: 5
ATOM   9521 C    LIG     1      -2.886  25.780 -24.410  1.00  0.00      LIG  
ATOM   9522 C1   LIG     1      -2.425  24.489 -23.806  1.00  0.00      LIG  
ATOM   9523 O    LIG     1      -2.503  23.422 -24.397  1.00  0.00      LIG  
ATOM   9524 N    LIG     1      -1.992  24.651 -22.512  1.00  0.00      LIG  
ATOM   9525 C2   LIG     1      -1.459  23.566 -21.700  1.00  0.00      LIG  
ATOM   9526 C3   LIG     1       0.010  23.888 -21.523  1.00  0.00      LIG  
ATOM   9527 O1   LIG     1       0.478  25.018 -21.534  1.00  0.00      LIG  
ATOM   9528 C4   LIG     1      -2.253  23.419 -20.384  1.00  0.00      LIG  
ATOM   9529 C5   LIG     1      -1.927  22.170 -19.550  1.00  0.00      LIG  
ATOM   9530 C6   LIG     1      -2.273  20.863 -20.259  1.00  0.00      LIG  
ATOM   9531 C7   LIG     1      -2.073  19.667 -19.337  1.00  0.00      LIG  
ATOM   9532 O2   LIG     1      -2.776  19.843 -18.111  1.00  0.00      LIG  
ATOM   9533 O3   LIG     1      -3.626  20.886 -20.714  1.00  0.00      LIG  
ATOM   9534 O4   LIG     1      -0.553  22.134 -19.170  1.00  0.00      LIG  
ATOM   9535 O5   LIG     1      -2.116  24.575 -19.549  1.00  0.00      LIG  
ATOM   9536 H    LIG     1      -3.935  25.944 -24.152  1.00  0.00      LIG  
ATOM   9537 H1   LIG     1      -2.777  25.718 -25.496  1.00  0.00      LIG  
ATOM   9538 H2   LIG     1      -2.283  26.618 -24.046  1.00  0.00      LIG  
ATOM   9539 H3   LIG     1      -1.932  25.593 -22.137  1.00  0.00      LIG  
ATOM   9540 H4   LIG     1      -1.515  22.640 -22.278  1.00  0.00      LIG  
ATOM   9541 H5   LIG     1       0.647  23.028 -21.267  1.00  0.00      LIG  
ATOM   9542 H6   LIG     1      -3.315  23.381 -20.644  1.00  0.00      LIG  
ATOM   9543 H7   LIG     1      -2.493  22.239 -18.619  1.00  0.00      LIG  
ATOM   9544 H8   LIG     1      -1.632  20.727 -21.134  1.00  0.00      LIG  
ATOM   9545 H9   LIG     1      -1.015  19.544 -19.103  1.00  0.00      LIG  
ATOM   9546 H10  LIG     1      -2.442  18.748 -19.799  1.00  0.00      LIG  
ATOM   9547 H11  LIG     1      -3.667  20.151 -18.354  1.00  0.00      LIG  
ATOM   9548 H12  LIG     1      -3.798  20.004 -21.095  1.00  0.00      LIG  
ATOM   9549 H13  LIG     1      -0.358  23.000 -18.770  1.00  0.00      LIG  
ATOM   9550 H14  LIG     1      -2.733  24.446 -18.805  1.00  0.00      LIG  
TER
REMARK  Energy: 5.79148
REMARK  SimpleFitness: 5.79148
REMARK  FullFitness: -2631.357
REMARK  InterFull: -31.9142
REMARK  IntraFull: 63.4974
REMARK  solvFull: -3065.06
REMARK  surfFull: 402.12
REMARK  extraFull: 0.0
REMARK  deltaGcompsolvpol: -3065.06
REMARK  deltaGcompsolvnonpol: 402.12
REMARK  deltaGprotsolvpol: -3070.97
REMARK  deltaGprotsolvnonpol: 403.01
REMARK  deltaGligsolvpol: -17.3526
REMARK  deltaGligsolvnonpol: 6.65942
REMARK  deltaGvdw: -31.9142
REMARK  deltaGelec: 0.0
REMARK  deltaG: -6.299594
REMARK  Cluster: 15
REMARK  ClusterRank: 6
ATOM   9521 C    LIG     1      -2.886  25.780 -24.410  1.00  0.00      LIG  
ATOM   9522 C1   LIG     1      -2.425  24.489 -23.806  1.00  0.00      LIG  
ATOM   9523 O    LIG     1      -2.503  23.422 -24.397  1.00  0.00      LIG  
ATOM   9524 N    LIG     1      -1.992  24.651 -22.512  1.00  0.00      LIG  
ATOM   9525 C2   LIG     1      -1.459  23.566 -21.700  1.00  0.00      LIG  
ATOM   9526 C3   LIG     1       0.010  23.888 -21.523  1.00  0.00      LIG  
ATOM   9527 O1   LIG     1       0.478  25.018 -21.534  1.00  0.00      LIG  
ATOM   9528 C4   LIG     1      -2.253  23.419 -20.384  1.00  0.00      LIG  
ATOM   9529 C5   LIG     1      -1.927  22.170 -19.550  1.00  0.00      LIG  
ATOM   9530 C6   LIG     1      -2.273  20.863 -20.259  1.00  0.00      LIG  
ATOM   9531 C7   LIG     1      -2.073  19.667 -19.337  1.00  0.00      LIG  
ATOM   9532 O2   LIG     1      -2.776  19.843 -18.111  1.00  0.00      LIG  
ATOM   9533 O3   LIG     1      -3.626  20.886 -20.714  1.00  0.00      LIG  
ATOM   9534 O4   LIG     1      -0.553  22.134 -19.170  1.00  0.00      LIG  
ATOM   9535 O5   LIG     1      -2.116  24.575 -19.549  1.00  0.00      LIG  
ATOM   9536 H    LIG     1      -3.935  25.944 -24.152  1.00  0.00      LIG  
ATOM   9537 H1   LIG     1      -2.777  25.718 -25.496  1.00  0.00      LIG  
ATOM   9538 H2   LIG     1      -2.283  26.618 -24.046  1.00  0.00      LIG  
ATOM   9539 H3   LIG     1      -1.932  25.593 -22.137  1.00  0.00      LIG  
ATOM   9540 H4   LIG     1      -1.515  22.640 -22.278  1.00  0.00      LIG  
ATOM   9541 H5   LIG     1       0.647  23.028 -21.267  1.00  0.00      LIG  
ATOM   9542 H6   LIG     1      -3.315  23.381 -20.644  1.00  0.00      LIG  
ATOM   9543 H7   LIG     1      -2.493  22.239 -18.619  1.00  0.00      LIG  
ATOM   9544 H8   LIG     1      -1.632  20.727 -21.134  1.00  0.00      LIG  
ATOM   9545 H9   LIG     1      -1.015  19.544 -19.103  1.00  0.00      LIG  
ATOM   9546 H10  LIG     1      -2.442  18.748 -19.799  1.00  0.00      LIG  
ATOM   9547 H11  LIG     1      -3.667  20.151 -18.354  1.00  0.00      LIG  
ATOM   9548 H12  LIG     1      -3.798  20.004 -21.095  1.00  0.00      LIG  
ATOM   9549 H13  LIG     1      -0.358  23.000 -18.770  1.00  0.00      LIG  
ATOM   9550 H14  LIG     1      -2.733  24.446 -18.805  1.00  0.00      LIG  
TER
REMARK  Energy: 5.79148
REMARK  SimpleFitness: 5.79148
REMARK  FullFitness: -2631.357
REMARK  InterFull: -31.9142
REMARK  IntraFull: 63.4974
REMARK  solvFull: -3065.06
REMARK  surfFull: 402.12
REMARK  extraFull: 0.0
REMARK  deltaGcompsolvpol: -3065.06
REMARK  deltaGcompsolvnonpol: 402.12
REMARK  deltaGprotsolvpol: -3070.97
REMARK  deltaGprotsolvnonpol: 403.01
REMARK  deltaGligsolvpol: -17.3526
REMARK  deltaGligsolvnonpol: 6.65942
REMARK  deltaGvdw: -31.9142
REMARK  deltaGelec: 0.0
REMARK  deltaG: -6.299594
REMARK  Cluster: 15
REMARK  ClusterRank: 7
ATOM   9521 C    LIG     1      -2.886  25.780 -24.410  1.00  0.00      LIG  
ATOM   9522 C1   LIG     1      -2.425  24.489 -23.806  1.00  0.00      LIG  
ATOM   9523 O    LIG     1      -2.503  23.422 -24.397  1.00  0.00      LIG  
ATOM   9524 N    LIG     1      -1.992  24.651 -22.512  1.00  0.00      LIG  
ATOM   9525 C2   LIG     1      -1.459  23.566 -21.700  1.00  0.00      LIG  
ATOM   9526 C3   LIG     1       0.010  23.888 -21.523  1.00  0.00      LIG  
ATOM   9527 O1   LIG     1       0.478  25.018 -21.534  1.00  0.00      LIG  
ATOM   9528 C4   LIG     1      -2.253  23.419 -20.384  1.00  0.00      LIG  
ATOM   9529 C5   LIG     1      -1.927  22.170 -19.550  1.00  0.00      LIG  
ATOM   9530 C6   LIG     1      -2.273  20.863 -20.259  1.00  0.00      LIG  
ATOM   9531 C7   LIG     1      -2.073  19.667 -19.337  1.00  0.00      LIG  
ATOM   9532 O2   LIG     1      -2.776  19.843 -18.111  1.00  0.00      LIG  
ATOM   9533 O3   LIG     1      -3.626  20.886 -20.714  1.00  0.00      LIG  
ATOM   9534 O4   LIG     1      -0.553  22.134 -19.170  1.00  0.00      LIG  
ATOM   9535 O5   LIG     1      -2.116  24.575 -19.549  1.00  0.00      LIG  
ATOM   9536 H    LIG     1      -3.935  25.944 -24.152  1.00  0.00      LIG  
ATOM   9537 H1   LIG     1      -2.777  25.718 -25.496  1.00  0.00      LIG  
ATOM   9538 H2   LIG     1      -2.283  26.618 -24.046  1.00  0.00      LIG  
ATOM   9539 H3   LIG     1      -1.932  25.593 -22.137  1.00  0.00      LIG  
ATOM   9540 H4   LIG     1      -1.515  22.640 -22.278  1.00  0.00      LIG  
ATOM   9541 H5   LIG     1       0.647  23.028 -21.267  1.00  0.00      LIG  
ATOM   9542 H6   LIG     1      -3.315  23.381 -20.644  1.00  0.00      LIG  
ATOM   9543 H7   LIG     1      -2.493  22.239 -18.619  1.00  0.00      LIG  
ATOM   9544 H8   LIG     1      -1.632  20.727 -21.134  1.00  0.00      LIG  
ATOM   9545 H9   LIG     1      -1.015  19.544 -19.103  1.00  0.00      LIG  
ATOM   9546 H10  LIG     1      -2.442  18.748 -19.799  1.00  0.00      LIG  
ATOM   9547 H11  LIG     1      -3.667  20.151 -18.354  1.00  0.00      LIG  
ATOM   9548 H12  LIG     1      -3.798  20.004 -21.095  1.00  0.00      LIG  
ATOM   9549 H13  LIG     1      -0.358  23.000 -18.770  1.00  0.00      LIG  
ATOM   9550 H14  LIG     1      -2.733  24.446 -18.805  1.00  0.00      LIG  
TER
REMARK  Energy: 4.84734
REMARK  SimpleFitness: 4.84734
REMARK  FullFitness: -2632.2427
REMARK  InterFull: -39.682
REMARK  IntraFull: 69.7233
REMARK  solvFull: -3063.95
REMARK  surfFull: 401.666
REMARK  extraFull: 0.0
REMARK  deltaGcompsolvpol: -3063.95
REMARK  deltaGcompsolvnonpol: 401.666
REMARK  deltaGprotsolvpol: -3070.97
REMARK  deltaGprotsolvnonpol: 403.01
REMARK  deltaGligsolvpol: -17.9759
REMARK  deltaGligsolvnonpol: 6.71688
REMARK  deltaGvdw: -39.682
REMARK  deltaGelec: 0.0
REMARK  deltaG: -6.9767284
REMARK  Cluster: 16
REMARK  ClusterRank: 0
ATOM   9521 C    LIG     1     -17.565   4.059 -28.278  1.00  0.00      LIG  
ATOM   9522 C1   LIG     1     -18.482   3.881 -27.111  1.00  0.00      LIG  
ATOM   9523 O    LIG     1     -19.657   3.576 -27.244  1.00  0.00      LIG  
ATOM   9524 N    LIG     1     -17.854   4.149 -25.917  1.00  0.00      LIG  
ATOM   9525 C2   LIG     1     -18.543   4.063 -24.634  1.00  0.00      LIG  
ATOM   9526 C3   LIG     1     -18.123   2.783 -23.953  1.00  0.00      LIG  
ATOM   9527 O1   LIG     1     -17.055   2.221 -24.155  1.00  0.00      LIG  
ATOM   9528 C4   LIG     1     -18.303   5.287 -23.733  1.00  0.00      LIG  
ATOM   9529 C5   LIG     1     -16.860   5.831 -23.769  1.00  0.00      LIG  
ATOM   9530 C6   LIG     1     -16.595   7.077 -22.904  1.00  0.00      LIG  
ATOM   9531 C7   LIG     1     -16.194   8.268 -23.769  1.00  0.00      LIG  
ATOM   9532 O2   LIG     1     -17.201   8.597 -24.718  1.00  0.00      LIG  
ATOM   9533 O3   LIG     1     -17.703   7.416 -22.071  1.00  0.00      LIG  
ATOM   9534 O4   LIG     1     -15.949   4.820 -23.337  1.00  0.00      LIG  
ATOM   9535 O5   LIG     1     -19.222   6.299 -24.141  1.00  0.00      LIG  
ATOM   9536 H    LIG     1     -18.052   3.661 -29.172  1.00  0.00      LIG  
ATOM   9537 H1   LIG     1     -16.632   3.514 -28.111  1.00  0.00      LIG  
ATOM   9538 H2   LIG     1     -17.353   5.123 -28.420  1.00  0.00      LIG  
ATOM   9539 H3   LIG     1     -16.857   4.344 -25.935  1.00  0.00      LIG  
ATOM   9540 H4   LIG     1     -19.615   3.955 -24.826  1.00  0.00      LIG  
ATOM   9541 H5   LIG     1     -18.775   2.463 -23.126  1.00  0.00      LIG  
ATOM   9542 H6   LIG     1     -18.559   5.019 -22.703  1.00  0.00      LIG  
ATOM   9543 H7   LIG     1     -16.579   6.076 -24.796  1.00  0.00      LIG  
ATOM   9544 H8   LIG     1     -15.766   6.893 -22.216  1.00  0.00      LIG  
ATOM   9545 H9   LIG     1     -15.280   8.038 -24.321  1.00  0.00      LIG  
ATOM   9546 H10  LIG     1     -16.016   9.154 -23.154  1.00  0.00      LIG  
ATOM   9547 H11  LIG     1     -17.928   9.003 -24.208  1.00  0.00      LIG  
ATOM   9548 H12  LIG     1     -17.854   8.378 -22.169  1.00  0.00      LIG  
ATOM   9549 H13  LIG     1     -16.164   4.003 -23.824  1.00  0.00      LIG  
ATOM   9550 H14  LIG     1     -19.057   7.062 -23.559  1.00  0.00      LIG  
TER
REMARK  Energy: 5.06075
REMARK  SimpleFitness: 5.06075
REMARK  FullFitness: -2631.7207
REMARK  InterFull: -39.7586
REMARK  IntraFull: 69.954
REMARK  solvFull: -3063.58
REMARK  surfFull: 401.664
REMARK  extraFull: 0.0
REMARK  deltaGcompsolvpol: -3063.58
REMARK  deltaGcompsolvnonpol: 401.664
REMARK  deltaGprotsolvpol: -3070.97
REMARK  deltaGprotsolvnonpol: 403.01
REMARK  deltaGligsolvpol: -18.1264
REMARK  deltaGligsolvnonpol: 6.71727
REMARK  deltaGvdw: -39.7586
REMARK  deltaGelec: 0.0
REMARK  deltaG: -6.9523525
REMARK  Cluster: 16
REMARK  ClusterRank: 1
ATOM   9521 C    LIG     1     -17.534   4.113 -28.350  1.00  0.00      LIG  
ATOM   9522 C1   LIG     1     -18.540   4.021 -27.250  1.00  0.00      LIG  
ATOM   9523 O    LIG     1     -19.725   3.810 -27.461  1.00  0.00      LIG  
ATOM   9524 N    LIG     1     -17.975   4.249 -26.018  1.00  0.00      LIG  
ATOM   9525 C2   LIG     1     -18.748   4.211 -24.782  1.00  0.00      LIG  
ATOM   9526 C3   LIG     1     -18.483   2.890 -24.101  1.00  0.00      LIG  
ATOM   9527 O1   LIG     1     -17.453   2.245 -24.241  1.00  0.00      LIG  
ATOM   9528 C4   LIG     1     -18.451   5.396 -23.847  1.00  0.00      LIG  
ATOM   9529 C5   LIG     1     -16.967   5.821 -23.810  1.00  0.00      LIG  
ATOM   9530 C6   LIG     1     -16.641   7.036 -22.920  1.00  0.00      LIG  
ATOM   9531 C7   LIG     1     -16.193   8.236 -23.750  1.00  0.00      LIG  
ATOM   9532 O2   LIG     1     -17.177   8.630 -24.698  1.00  0.00      LIG  
ATOM   9533 O3   LIG     1     -17.732   7.394 -22.074  1.00  0.00      LIG  
ATOM   9534 O4   LIG     1     -16.172   4.731 -23.343  1.00  0.00      LIG  
ATOM   9535 O5   LIG     1     -19.272   6.484 -24.269  1.00  0.00      LIG  
ATOM   9536 H    LIG     1     -17.979   3.718 -29.266  1.00  0.00      LIG  
ATOM   9537 H1   LIG     1     -16.648   3.520 -28.103  1.00  0.00      LIG  
ATOM   9538 H2   LIG     1     -17.252   5.158 -28.501  1.00  0.00      LIG  
ATOM   9539 H3   LIG     1     -16.966   4.363 -25.969  1.00  0.00      LIG  
ATOM   9540 H4   LIG     1     -19.812   4.204 -25.040  1.00  0.00      LIG  
ATOM   9541 H5   LIG     1     -19.212   2.615 -23.323  1.00  0.00      LIG  
ATOM   9542 H6   LIG     1     -18.773   5.131 -22.835  1.00  0.00      LIG  
ATOM   9543 H7   LIG     1     -16.614   6.049 -24.818  1.00  0.00      LIG  
ATOM   9544 H8   LIG     1     -15.816   6.798 -22.242  1.00  0.00      LIG  
ATOM   9545 H9   LIG     1     -15.283   7.989 -24.301  1.00  0.00      LIG  
ATOM   9546 H10  LIG     1     -15.990   9.097 -23.108  1.00  0.00      LIG  
ATOM   9547 H11  LIG     1     -17.891   9.054 -24.183  1.00  0.00      LIG  
ATOM   9548 H12  LIG     1     -17.871   8.357 -22.168  1.00  0.00      LIG  
ATOM   9549 H13  LIG     1     -16.460   3.931 -23.819  1.00  0.00      LIG  
ATOM   9550 H14  LIG     1     -19.094   7.214 -23.649  1.00  0.00      LIG  
TER
REMARK  Energy: 4.91334
REMARK  SimpleFitness: 4.91334
REMARK  FullFitness: -2631.698
REMARK  InterFull: -37.7641
REMARK  IntraFull: 69.5871
REMARK  solvFull: -3065.17
REMARK  surfFull: 401.649
REMARK  extraFull: 0.0
REMARK  deltaGcompsolvpol: -3065.17
REMARK  deltaGcompsolvnonpol: 401.649
REMARK  deltaGprotsolvpol: -3070.97
REMARK  deltaGprotsolvnonpol: 403.01
REMARK  deltaGligsolvpol: -18.4121
REMARK  deltaGligsolvnonpol: 6.7736
REMARK  deltaGvdw: -37.7641
REMARK  deltaGelec: 0.0
REMARK  deltaG: -6.8502355
REMARK  Cluster: 16
REMARK  ClusterRank: 2
ATOM   9521 C    LIG     1     -17.595   4.166 -28.197  1.00  0.00      LIG  
ATOM   9522 C1   LIG     1     -18.481   4.217 -26.990  1.00  0.00      LIG  
ATOM   9523 O    LIG     1     -19.664   4.508 -27.068  1.00  0.00      LIG  
ATOM   9524 N    LIG     1     -17.809   3.928 -25.824  1.00  0.00      LIG  
ATOM   9525 C2   LIG     1     -18.475   3.915 -24.528  1.00  0.00      LIG  
ATOM   9526 C3   LIG     1     -18.002   2.690 -23.789  1.00  0.00      LIG  
ATOM   9527 O1   LIG     1     -16.928   2.141 -23.994  1.00  0.00      LIG  
ATOM   9528 C4   LIG     1     -18.263   5.195 -23.697  1.00  0.00      LIG  
ATOM   9529 C5   LIG     1     -16.846   5.795 -23.788  1.00  0.00      LIG  
ATOM   9530 C6   LIG     1     -16.606   7.058 -22.936  1.00  0.00      LIG  
ATOM   9531 C7   LIG     1     -16.220   8.243 -23.815  1.00  0.00      LIG  
ATOM   9532 O2   LIG     1     -17.238   8.555 -24.759  1.00  0.00      LIG  
ATOM   9533 O3   LIG     1     -17.724   7.392 -22.115  1.00  0.00      LIG  
ATOM   9534 O4   LIG     1     -15.876   4.830 -23.382  1.00  0.00      LIG  
ATOM   9535 O5   LIG     1     -19.227   6.154 -24.131  1.00  0.00      LIG  
ATOM   9536 H    LIG     1     -18.161   3.745 -29.031  1.00  0.00      LIG  
ATOM   9537 H1   LIG     1     -16.717   3.536 -28.021  1.00  0.00      LIG  
ATOM   9538 H2   LIG     1     -17.269   5.180 -28.444  1.00  0.00      LIG  
ATOM   9539 H3   LIG     1     -16.812   3.741 -25.874  1.00  0.00      LIG  
ATOM   9540 H4   LIG     1     -19.546   3.765 -24.700  1.00  0.00      LIG  
ATOM   9541 H5   LIG     1     -18.623   2.400 -22.927  1.00  0.00      LIG  
ATOM   9542 H6   LIG     1     -18.488   4.969 -22.650  1.00  0.00      LIG  
ATOM   9543 H7   LIG     1     -16.617   6.041 -24.828  1.00  0.00      LIG  
ATOM   9544 H8   LIG     1     -15.777   6.897 -22.241  1.00  0.00      LIG  
ATOM   9545 H9   LIG     1     -15.306   8.016 -24.370  1.00  0.00      LIG  
ATOM   9546 H10  LIG     1     -16.047   9.136 -23.208  1.00  0.00      LIG  
ATOM   9547 H11  LIG     1     -17.966   8.954 -24.246  1.00  0.00      LIG  
ATOM   9548 H12  LIG     1     -17.865   8.357 -22.196  1.00  0.00      LIG  
ATOM   9549 H13  LIG     1     -16.073   4.000 -23.853  1.00  0.00      LIG  
ATOM   9550 H14  LIG     1     -19.072   6.952 -23.594  1.00  0.00      LIG  
TER
REMARK  Energy: 15.5586
REMARK  SimpleFitness: 15.5586
REMARK  FullFitness: -2618.7966
REMARK  InterFull: -30.9862
REMARK  IntraFull: 75.4976
REMARK  solvFull: -3064.84
REMARK  surfFull: 401.532
REMARK  extraFull: 0.0
REMARK  deltaGcompsolvpol: -3064.84
REMARK  deltaGcompsolvnonpol: 401.532
REMARK  deltaGprotsolvpol: -3070.97
REMARK  deltaGprotsolvnonpol: 403.01
REMARK  deltaGligsolvpol: -19.2451
REMARK  deltaGligsolvnonpol: 7.03515
REMARK  deltaGvdw: -30.9862
REMARK  deltaGelec: 0.0
REMARK  deltaG: -6.1736894
REMARK  Cluster: 16
REMARK  ClusterRank: 3
ATOM   9521 C    LIG     1     -17.724   3.038 -26.382  1.00  0.00      LIG  
ATOM   9522 C1   LIG     1     -18.502   4.312 -26.554  1.00  0.00      LIG  
ATOM   9523 O    LIG     1     -18.571   4.845 -27.649  1.00  0.00      LIG  
ATOM   9524 N    LIG     1     -19.144   4.847 -25.446  1.00  0.00      LIG  
ATOM   9525 C2   LIG     1     -19.105   4.453 -24.034  1.00  0.00      LIG  
ATOM   9526 C3   LIG     1     -19.879   3.165 -23.836  1.00  0.00      LIG  
ATOM   9527 O1   LIG     1     -20.779   2.797 -24.576  1.00  0.00      LIG  
ATOM   9528 C4   LIG     1     -17.709   4.400 -23.380  1.00  0.00      LIG  
ATOM   9529 C5   LIG     1     -16.808   5.595 -23.751  1.00  0.00      LIG  
ATOM   9530 C6   LIG     1     -16.961   6.854 -22.888  1.00  0.00      LIG  
ATOM   9531 C7   LIG     1     -16.285   8.036 -23.578  1.00  0.00      LIG  
ATOM   9532 O2   LIG     1     -16.950   8.381 -24.788  1.00  0.00      LIG  
ATOM   9533 O3   LIG     1     -18.329   7.164 -22.616  1.00  0.00      LIG  
ATOM   9534 O4   LIG     1     -15.446   5.186 -23.634  1.00  0.00      LIG  
ATOM   9535 O5   LIG     1     -17.855   4.353 -21.959  1.00  0.00      LIG  
ATOM   9536 H    LIG     1     -17.491   2.640 -27.373  1.00  0.00      LIG  
ATOM   9537 H1   LIG     1     -18.311   2.292 -25.842  1.00  0.00      LIG  
ATOM   9538 H2   LIG     1     -16.789   3.242 -25.855  1.00  0.00      LIG  
ATOM   9539 H3   LIG     1     -19.666   5.695 -25.643  1.00  0.00      LIG  
ATOM   9540 H4   LIG     1     -19.699   5.202 -23.504  1.00  0.00      LIG  
ATOM   9541 H5   LIG     1     -19.768   2.707 -22.841  1.00  0.00      LIG  
ATOM   9542 H6   LIG     1     -17.213   3.466 -23.662  1.00  0.00      LIG  
ATOM   9543 H7   LIG     1     -16.948   5.851 -24.801  1.00  0.00      LIG  
ATOM   9544 H8   LIG     1     -16.461   6.705 -21.927  1.00  0.00      LIG  
ATOM   9545 H9   LIG     1     -15.249   7.799 -23.827  1.00  0.00      LIG  
ATOM   9546 H10  LIG     1     -16.292   8.917 -22.932  1.00  0.00      LIG  
ATOM   9547 H11  LIG     1     -17.855   8.634 -24.533  1.00  0.00      LIG  
ATOM   9548 H12  LIG     1     -18.382   8.132 -22.481  1.00  0.00      LIG  
ATOM   9549 H13  LIG     1     -15.302   4.509 -24.318  1.00  0.00      LIG  
ATOM   9550 H14  LIG     1     -18.230   5.214 -21.697  1.00  0.00      LIG  
TER
REMARK  Energy: 15.5142
REMARK  SimpleFitness: 15.5142
REMARK  FullFitness: -2618.4993
REMARK  InterFull: -30.3868
REMARK  IntraFull: 75.1285
REMARK  solvFull: -3064.74
REMARK  surfFull: 401.499
REMARK  extraFull: 0.0
REMARK  deltaGcompsolvpol: -3064.74
REMARK  deltaGcompsolvnonpol: 401.499
REMARK  deltaGprotsolvpol: -3070.97
REMARK  deltaGprotsolvnonpol: 403.01
REMARK  deltaGligsolvpol: -19.1728
REMARK  deltaGligsolvnonpol: 7.02839
REMARK  deltaGvdw: -30.3868
REMARK  deltaGelec: 0.0
REMARK  deltaG: -6.1177692
REMARK  Cluster: 16
REMARK  ClusterRank: 4
ATOM   9521 C    LIG     1     -17.550   2.820 -26.286  1.00  0.00      LIG  
ATOM   9522 C1   LIG     1     -18.346   4.062 -26.571  1.00  0.00      LIG  
ATOM   9523 O    LIG     1     -18.384   4.521 -27.701  1.00  0.00      LIG  
ATOM   9524 N    LIG     1     -19.039   4.655 -25.523  1.00  0.00      LIG  
ATOM   9525 C2   LIG     1     -19.055   4.347 -24.089  1.00  0.00      LIG  
ATOM   9526 C3   LIG     1     -19.827   3.065 -23.849  1.00  0.00      LIG  
ATOM   9527 O1   LIG     1     -20.694   2.647 -24.604  1.00  0.00      LIG  
ATOM   9528 C4   LIG     1     -17.688   4.347 -23.374  1.00  0.00      LIG  
ATOM   9529 C5   LIG     1     -16.795   5.542 -23.760  1.00  0.00      LIG  
ATOM   9530 C6   LIG     1     -16.993   6.826 -22.945  1.00  0.00      LIG  
ATOM   9531 C7   LIG     1     -16.304   7.993 -23.647  1.00  0.00      LIG  
ATOM   9532 O2   LIG     1     -16.924   8.279 -24.896  1.00  0.00      LIG  
ATOM   9533 O3   LIG     1     -18.373   7.133 -22.739  1.00  0.00      LIG  
ATOM   9534 O4   LIG     1     -15.431   5.158 -23.592  1.00  0.00      LIG  
ATOM   9535 O5   LIG     1     -17.892   4.359 -21.960  1.00  0.00      LIG  
ATOM   9536 H    LIG     1     -17.290   2.351 -27.239  1.00  0.00      LIG  
ATOM   9537 H1   LIG     1     -18.135   2.105 -25.702  1.00  0.00      LIG  
ATOM   9538 H2   LIG     1     -16.631   3.082 -25.758  1.00  0.00      LIG  
ATOM   9539 H3   LIG     1     -19.570   5.476 -25.794  1.00  0.00      LIG  
ATOM   9540 H4   LIG     1     -19.677   5.120 -23.630  1.00  0.00      LIG  
ATOM   9541 H5   LIG     1     -19.757   2.666 -22.826  1.00  0.00      LIG  
ATOM   9542 H6   LIG     1     -17.165   3.411 -23.593  1.00  0.00      LIG  
ATOM   9543 H7   LIG     1     -16.910   5.760 -24.822  1.00  0.00      LIG  
ATOM   9544 H8   LIG     1     -16.531   6.713 -21.959  1.00  0.00      LIG  
ATOM   9545 H9   LIG     1     -15.255   7.765 -23.842  1.00  0.00      LIG  
ATOM   9546 H10  LIG     1     -16.352   8.897 -23.035  1.00  0.00      LIG  
ATOM   9547 H11  LIG     1     -17.862   8.449 -24.698  1.00  0.00      LIG  
ATOM   9548 H12  LIG     1     -18.429   8.095 -22.568  1.00  0.00      LIG  
ATOM   9549 H13  LIG     1     -15.266   4.437 -24.224  1.00  0.00      LIG  
ATOM   9550 H14  LIG     1     -18.283   5.227 -21.750  1.00  0.00      LIG  
TER
REMARK  Energy: 23.0479
REMARK  SimpleFitness: 23.0479
REMARK  FullFitness: -2606.5818
REMARK  InterFull: -21.74
REMARK  IntraFull: 80.5103
REMARK  solvFull: -3067.01
REMARK  surfFull: 401.658
REMARK  extraFull: 0.0
REMARK  deltaGcompsolvpol: -3067.01
REMARK  deltaGcompsolvnonpol: 401.658
REMARK  deltaGprotsolvpol: -3070.97
REMARK  deltaGprotsolvnonpol: 403.01
REMARK  deltaGligsolvpol: -20.4524
REMARK  deltaGligsolvnonpol: 6.90848
REMARK  deltaGvdw: -21.74
REMARK  deltaGelec: 0.0
REMARK  deltaG: -5.3340106
REMARK  Cluster: 16
REMARK  ClusterRank: 5
ATOM   9521 C    LIG     1     -17.831   2.169 -26.364  1.00  0.00      LIG  
ATOM   9522 C1   LIG     1     -18.130   3.396 -27.172  1.00  0.00      LIG  
ATOM   9523 O    LIG     1     -17.933   3.403 -28.376  1.00  0.00      LIG  
ATOM   9524 N    LIG     1     -18.650   4.501 -26.522  1.00  0.00      LIG  
ATOM   9525 C2   LIG     1     -18.885   4.759 -25.099  1.00  0.00      LIG  
ATOM   9526 C3   LIG     1     -20.127   4.032 -24.619  1.00  0.00      LIG  
ATOM   9527 O1   LIG     1     -21.021   3.654 -25.364  1.00  0.00      LIG  
ATOM   9528 C4   LIG     1     -17.629   4.657 -24.189  1.00  0.00      LIG  
ATOM   9529 C5   LIG     1     -17.490   5.797 -23.165  1.00  0.00      LIG  
ATOM   9530 C6   LIG     1     -16.587   6.940 -23.654  1.00  0.00      LIG  
ATOM   9531 C7   LIG     1     -17.198   7.853 -24.715  1.00  0.00      LIG  
ATOM   9532 O2   LIG     1     -17.124   7.267 -26.009  1.00  0.00      LIG  
ATOM   9533 O3   LIG     1     -16.254   7.754 -22.531  1.00  0.00      LIG  
ATOM   9534 O4   LIG     1     -18.768   6.299 -22.773  1.00  0.00      LIG  
ATOM   9535 O5   LIG     1     -17.588   3.415 -23.475  1.00  0.00      LIG  
ATOM   9536 H    LIG     1     -17.739   1.320 -27.046  1.00  0.00      LIG  
ATOM   9537 H1   LIG     1     -18.638   1.959 -25.659  1.00  0.00      LIG  
ATOM   9538 H2   LIG     1     -16.884   2.305 -25.834  1.00  0.00      LIG  
ATOM   9539 H3   LIG     1     -18.837   5.286 -27.135  1.00  0.00      LIG  
ATOM   9540 H4   LIG     1     -19.183   5.808 -25.113  1.00  0.00      LIG  
ATOM   9541 H5   LIG     1     -20.305   4.089 -23.535  1.00  0.00      LIG  
ATOM   9542 H6   LIG     1     -16.727   4.661 -24.807  1.00  0.00      LIG  
ATOM   9543 H7   LIG     1     -17.043   5.403 -22.245  1.00  0.00      LIG  
ATOM   9544 H8   LIG     1     -15.655   6.511 -24.031  1.00  0.00      LIG  
ATOM   9545 H9   LIG     1     -16.666   8.808 -24.754  1.00  0.00      LIG  
ATOM   9546 H10  LIG     1     -18.243   8.083 -24.495  1.00  0.00      LIG  
ATOM   9547 H11  LIG     1     -16.237   6.879 -26.104  1.00  0.00      LIG  
ATOM   9548 H12  LIG     1     -15.924   7.160 -21.836  1.00  0.00      LIG  
ATOM   9549 H13  LIG     1     -18.618   7.191 -22.410  1.00  0.00      LIG  
ATOM   9550 H14  LIG     1     -16.799   3.440 -22.908  1.00  0.00      LIG  
TER
REMARK  Energy: 2.15592
REMARK  SimpleFitness: 2.15592
REMARK  FullFitness: -2632.1155
REMARK  InterFull: -33.0564
REMARK  IntraFull: 65.5678
REMARK  solvFull: -3067.52
REMARK  surfFull: 402.893
REMARK  extraFull: 0.0
REMARK  deltaGcompsolvpol: -3067.52
REMARK  deltaGcompsolvnonpol: 402.893
REMARK  deltaGprotsolvpol: -3070.97
REMARK  deltaGprotsolvnonpol: 403.01
REMARK  deltaGligsolvpol: -19.0844
REMARK  deltaGligsolvnonpol: 6.6531
REMARK  deltaGvdw: -33.0564
REMARK  deltaGelec: 0.0
REMARK  deltaG: -6.3784847
REMARK  Cluster: 17
REMARK  ClusterRank: 0
ATOM   9521 C    LIG     1     -26.475  23.895 -56.219  1.00  0.00      LIG  
ATOM   9522 C1   LIG     1     -27.464  22.813 -55.900  1.00  0.00      LIG  
ATOM   9523 O    LIG     1     -28.616  22.845 -56.306  1.00  0.00      LIG  
ATOM   9524 N    LIG     1     -26.895  21.752 -55.238  1.00  0.00      LIG  
ATOM   9525 C2   LIG     1     -27.621  20.518 -54.989  1.00  0.00      LIG  
ATOM   9526 C3   LIG     1     -26.569  19.457 -54.775  1.00  0.00      LIG  
ATOM   9527 O1   LIG     1     -25.415  19.681 -54.435  1.00  0.00      LIG  
ATOM   9528 C4   LIG     1     -28.629  20.606 -53.826  1.00  0.00      LIG  
ATOM   9529 C5   LIG     1     -29.434  19.313 -53.667  1.00  0.00      LIG  
ATOM   9530 C6   LIG     1     -30.520  19.434 -52.584  1.00  0.00      LIG  
ATOM   9531 C7   LIG     1     -31.613  20.468 -52.871  1.00  0.00      LIG  
ATOM   9532 O2   LIG     1     -32.318  20.211 -54.081  1.00  0.00      LIG  
ATOM   9533 O3   LIG     1     -31.119  18.157 -52.353  1.00  0.00      LIG  
ATOM   9534 O4   LIG     1     -29.989  18.933 -54.925  1.00  0.00      LIG  
ATOM   9535 O5   LIG     1     -27.981  20.902 -52.585  1.00  0.00      LIG  
ATOM   9536 H    LIG     1     -26.921  24.864 -55.985  1.00  0.00      LIG  
ATOM   9537 H1   LIG     1     -26.231  23.849 -57.284  1.00  0.00      LIG  
ATOM   9538 H2   LIG     1     -25.554  23.783 -55.638  1.00  0.00      LIG  
ATOM   9539 H3   LIG     1     -25.940  21.829 -54.904  1.00  0.00      LIG  
ATOM   9540 H4   LIG     1     -28.145  20.271 -55.917  1.00  0.00      LIG  
ATOM   9541 H5   LIG     1     -26.929  18.423 -54.878  1.00  0.00      LIG  
ATOM   9542 H6   LIG     1     -29.303  21.439 -54.044  1.00  0.00      LIG  
ATOM   9543 H7   LIG     1     -28.759  18.505 -53.373  1.00  0.00      LIG  
ATOM   9544 H8   LIG     1     -30.044  19.717 -51.642  1.00  0.00      LIG  
ATOM   9545 H9   LIG     1     -31.186  21.471 -52.942  1.00  0.00      LIG  
ATOM   9546 H10  LIG     1     -32.345  20.472 -52.061  1.00  0.00      LIG  
ATOM   9547 H11  LIG     1     -31.649  19.938 -54.734  1.00  0.00      LIG  
ATOM   9548 H12  LIG     1     -30.386  17.530 -52.193  1.00  0.00      LIG  
ATOM   9549 H13  LIG     1     -30.466  18.098 -54.771  1.00  0.00      LIG  
ATOM   9550 H14  LIG     1     -28.675  21.079 -51.928  1.00  0.00      LIG  
TER
REMARK  Energy: 3.06873
REMARK  SimpleFitness: 3.06873
REMARK  FullFitness: -2631.5845
REMARK  InterFull: -32.5923
REMARK  IntraFull: 65.422
REMARK  solvFull: -3067.36
REMARK  surfFull: 402.946
REMARK  extraFull: 0.0
REMARK  deltaGcompsolvpol: -3067.36
REMARK  deltaGcompsolvnonpol: 402.946
REMARK  deltaGprotsolvpol: -3070.97
REMARK  deltaGprotsolvnonpol: 403.01
REMARK  deltaGligsolvpol: -19.0625
REMARK  deltaGligsolvnonpol: 6.62054
REMARK  deltaGvdw: -32.5923
REMARK  deltaGelec: 0.0
REMARK  deltaG: -6.31804
REMARK  Cluster: 17
REMARK  ClusterRank: 1
ATOM   9521 C    LIG     1     -26.081  23.823 -56.178  1.00  0.00      LIG  
ATOM   9522 C1   LIG     1     -27.149  22.805 -55.912  1.00  0.00      LIG  
ATOM   9523 O    LIG     1     -28.296  22.944 -56.309  1.00  0.00      LIG  
ATOM   9524 N    LIG     1     -26.656  21.665 -55.326  1.00  0.00      LIG  
ATOM   9525 C2   LIG     1     -27.465  20.471 -55.152  1.00  0.00      LIG  
ATOM   9526 C3   LIG     1     -26.490  19.323 -55.024  1.00  0.00      LIG  
ATOM   9527 O1   LIG     1     -25.282  19.415 -55.195  1.00  0.00      LIG  
ATOM   9528 C4   LIG     1     -28.450  20.556 -53.964  1.00  0.00      LIG  
ATOM   9529 C5   LIG     1     -29.335  19.309 -53.849  1.00  0.00      LIG  
ATOM   9530 C6   LIG     1     -30.409  19.447 -52.754  1.00  0.00      LIG  
ATOM   9531 C7   LIG     1     -31.447  20.552 -52.984  1.00  0.00      LIG  
ATOM   9532 O2   LIG     1     -32.141  20.416 -54.219  1.00  0.00      LIG  
ATOM   9533 O3   LIG     1     -31.080  18.196 -52.577  1.00  0.00      LIG  
ATOM   9534 O4   LIG     1     -29.911  19.014 -55.121  1.00  0.00      LIG  
ATOM   9535 O5   LIG     1     -27.766  20.748 -52.721  1.00  0.00      LIG  
ATOM   9536 H    LIG     1     -26.487  24.819 -55.986  1.00  0.00      LIG  
ATOM   9537 H1   LIG     1     -25.762  23.742 -57.221  1.00  0.00      LIG  
ATOM   9538 H2   LIG     1     -25.214  23.668 -55.527  1.00  0.00      LIG  
ATOM   9539 H3   LIG     1     -25.681  21.636 -55.043  1.00  0.00      LIG  
ATOM   9540 H4   LIG     1     -28.023  20.322 -56.083  1.00  0.00      LIG  
ATOM   9541 H5   LIG     1     -26.952  18.330 -54.942  1.00  0.00      LIG  
ATOM   9542 H6   LIG     1     -29.074  21.439 -54.125  1.00  0.00      LIG  
ATOM   9543 H7   LIG     1     -28.710  18.449 -53.589  1.00  0.00      LIG  
ATOM   9544 H8   LIG     1     -29.916  19.658 -51.802  1.00  0.00      LIG  
ATOM   9545 H9   LIG     1     -30.971  21.535 -52.977  1.00  0.00      LIG  
ATOM   9546 H10  LIG     1     -32.195  20.538 -52.187  1.00  0.00      LIG  
ATOM   9547 H11  LIG     1     -31.472  20.168 -54.882  1.00  0.00      LIG  
ATOM   9548 H12  LIG     1     -30.386  17.529 -52.402  1.00  0.00      LIG  
ATOM   9549 H13  LIG     1     -30.451  18.212 -54.998  1.00  0.00      LIG  
ATOM   9550 H14  LIG     1     -28.438  20.949 -52.047  1.00  0.00      LIG  
TER
REMARK  Energy: 5.88196
REMARK  SimpleFitness: 5.88196
REMARK  FullFitness: -2631.5403
REMARK  InterFull: -35.7514
REMARK  IntraFull: 69.4242
REMARK  solvFull: -3068.32
REMARK  surfFull: 403.107
REMARK  extraFull: 0.0
REMARK  deltaGcompsolvpol: -3068.32
REMARK  deltaGcompsolvnonpol: 403.107
REMARK  deltaGprotsolvpol: -3070.97
REMARK  deltaGprotsolvnonpol: 403.01
REMARK  deltaGligsolvpol: -18.8564
REMARK  deltaGligsolvnonpol: 6.87244
REMARK  deltaGvdw: -35.7514
REMARK  deltaGelec: 0.0
REMARK  deltaG: -6.696855
REMARK  Cluster: 17
REMARK  ClusterRank: 2
ATOM   9521 C    LIG     1     -28.318  21.851 -57.101  1.00  0.00      LIG  
ATOM   9522 C1   LIG     1     -27.517  22.666 -56.123  1.00  0.00      LIG  
ATOM   9523 O    LIG     1     -27.232  23.828 -56.367  1.00  0.00      LIG  
ATOM   9524 N    LIG     1     -27.137  22.039 -54.950  1.00  0.00      LIG  
ATOM   9525 C2   LIG     1     -27.491  20.681 -54.538  1.00  0.00      LIG  
ATOM   9526 C3   LIG     1     -26.404  20.192 -53.602  1.00  0.00      LIG  
ATOM   9527 O1   LIG     1     -25.231  20.532 -53.677  1.00  0.00      LIG  
ATOM   9528 C4   LIG     1     -28.895  20.626 -53.892  1.00  0.00      LIG  
ATOM   9529 C5   LIG     1     -29.396  19.205 -53.628  1.00  0.00      LIG  
ATOM   9530 C6   LIG     1     -30.871  19.178 -53.168  1.00  0.00      LIG  
ATOM   9531 C7   LIG     1     -31.911  19.569 -54.224  1.00  0.00      LIG  
ATOM   9532 O2   LIG     1     -31.950  18.657 -55.317  1.00  0.00      LIG  
ATOM   9533 O3   LIG     1     -31.211  17.885 -52.659  1.00  0.00      LIG  
ATOM   9534 O4   LIG     1     -29.176  18.419 -54.795  1.00  0.00      LIG  
ATOM   9535 O5   LIG     1     -28.935  21.357 -52.663  1.00  0.00      LIG  
ATOM   9536 H    LIG     1     -28.469  22.445 -58.007  1.00  0.00      LIG  
ATOM   9537 H1   LIG     1     -29.295  21.616 -56.674  1.00  0.00      LIG  
ATOM   9538 H2   LIG     1     -27.788  20.931 -57.367  1.00  0.00      LIG  
ATOM   9539 H3   LIG     1     -26.606  22.608 -54.296  1.00  0.00      LIG  
ATOM   9540 H4   LIG     1     -27.454  20.033 -55.416  1.00  0.00      LIG  
ATOM   9541 H5   LIG     1     -26.653  19.285 -53.035  1.00  0.00      LIG  
ATOM   9542 H6   LIG     1     -29.590  21.111 -54.581  1.00  0.00      LIG  
ATOM   9543 H7   LIG     1     -28.792  18.759 -52.834  1.00  0.00      LIG  
ATOM   9544 H8   LIG     1     -30.983  19.864 -52.326  1.00  0.00      LIG  
ATOM   9545 H9   LIG     1     -31.732  20.573 -54.616  1.00  0.00      LIG  
ATOM   9546 H10  LIG     1     -32.909  19.555 -53.779  1.00  0.00      LIG  
ATOM   9547 H11  LIG     1     -31.932  17.769 -54.921  1.00  0.00      LIG  
ATOM   9548 H12  LIG     1     -30.405  17.516 -52.247  1.00  0.00      LIG  
ATOM   9549 H13  LIG     1     -29.566  17.543 -54.626  1.00  0.00      LIG  
ATOM   9550 H14  LIG     1     -28.537  22.228 -52.840  1.00  0.00      LIG  
TER
REMARK  Energy: 5.67849
REMARK  SimpleFitness: 5.67849
REMARK  FullFitness: -2630.4453
REMARK  InterFull: -35.7615
REMARK  IntraFull: 69.1322
REMARK  solvFull: -3066.78
REMARK  surfFull: 402.964
REMARK  extraFull: 0.0
REMARK  deltaGcompsolvpol: -3066.78
REMARK  deltaGcompsolvnonpol: 402.964
REMARK  deltaGprotsolvpol: -3070.97
REMARK  deltaGprotsolvnonpol: 403.01
REMARK  deltaGligsolvpol: -18.8985
REMARK  deltaGligsolvnonpol: 6.5449
REMARK  deltaGvdw: -35.7615
REMARK  deltaGelec: 0.0
REMARK  deltaG: -6.583526
REMARK  Cluster: 17
REMARK  ClusterRank: 3
ATOM   9521 C    LIG     1     -27.013  24.032 -56.714  1.00  0.00      LIG  
ATOM   9522 C1   LIG     1     -27.021  22.560 -56.431  1.00  0.00      LIG  
ATOM   9523 O    LIG     1     -27.226  21.732 -57.305  1.00  0.00      LIG  
ATOM   9524 N    LIG     1     -26.838  22.260 -55.100  1.00  0.00      LIG  
ATOM   9525 C2   LIG     1     -26.726  20.885 -54.623  1.00  0.00      LIG  
ATOM   9526 C3   LIG     1     -25.255  20.756 -54.279  1.00  0.00      LIG  
ATOM   9527 O1   LIG     1     -24.701  19.674 -54.154  1.00  0.00      LIG  
ATOM   9528 C4   LIG     1     -27.732  20.611 -53.477  1.00  0.00      LIG  
ATOM   9529 C5   LIG     1     -29.036  20.024 -54.051  1.00  0.00      LIG  
ATOM   9530 C6   LIG     1     -30.173  19.949 -53.023  1.00  0.00      LIG  
ATOM   9531 C7   LIG     1     -31.488  19.477 -53.639  1.00  0.00      LIG  
ATOM   9532 O2   LIG     1     -31.316  18.263 -54.364  1.00  0.00      LIG  
ATOM   9533 O3   LIG     1     -29.847  19.083 -51.940  1.00  0.00      LIG  
ATOM   9534 O4   LIG     1     -29.496  20.825 -55.138  1.00  0.00      LIG  
ATOM   9535 O5   LIG     1     -27.210  19.710 -52.497  1.00  0.00      LIG  
ATOM   9536 H    LIG     1     -26.357  24.221 -57.567  1.00  0.00      LIG  
ATOM   9537 H1   LIG     1     -26.646  24.604 -55.856  1.00  0.00      LIG  
ATOM   9538 H2   LIG     1     -28.031  24.352 -56.949  1.00  0.00      LIG  
ATOM   9539 H3   LIG     1     -26.643  23.024 -54.454  1.00  0.00      LIG  
ATOM   9540 H4   LIG     1     -26.906  20.185 -55.444  1.00  0.00      LIG  
ATOM   9541 H5   LIG     1     -24.773  21.653 -53.862  1.00  0.00      LIG  
ATOM   9542 H6   LIG     1     -27.962  21.547 -52.958  1.00  0.00      LIG  
ATOM   9543 H7   LIG     1     -28.827  19.018 -54.427  1.00  0.00      LIG  
ATOM   9544 H8   LIG     1     -30.341  20.943 -52.600  1.00  0.00      LIG  
ATOM   9545 H9   LIG     1     -31.887  20.226 -54.328  1.00  0.00      LIG  
ATOM   9546 H10  LIG     1     -32.234  19.291 -52.861  1.00  0.00      LIG  
ATOM   9547 H11  LIG     1     -30.874  17.635 -53.769  1.00  0.00      LIG  
ATOM   9548 H12  LIG     1     -29.644  18.199 -52.303  1.00  0.00      LIG  
ATOM   9549 H13  LIG     1     -28.754  20.916 -55.763  1.00  0.00      LIG  
ATOM   9550 H14  LIG     1     -27.960  19.465 -51.924  1.00  0.00      LIG  
TER
REMARK  Energy: 5.68008
REMARK  SimpleFitness: 5.68008
REMARK  FullFitness: -2630.4395
REMARK  InterFull: -35.7029
REMARK  IntraFull: 69.1097
REMARK  solvFull: -3066.81
REMARK  surfFull: 402.964
REMARK  extraFull: 0.0
REMARK  deltaGcompsolvpol: -3066.81
REMARK  deltaGcompsolvnonpol: 402.964
REMARK  deltaGprotsolvpol: -3070.97
REMARK  deltaGprotsolvnonpol: 403.01
REMARK  deltaGligsolvpol: -18.8987
REMARK  deltaGligsolvnonpol: 6.5452
REMARK  deltaGvdw: -35.7029
REMARK  deltaGelec: 0.0
REMARK  deltaG: -6.579837
REMARK  Cluster: 17
REMARK  ClusterRank: 4
ATOM   9521 C    LIG     1     -27.031  24.016 -56.723  1.00  0.00      LIG  
ATOM   9522 C1   LIG     1     -27.027  22.545 -56.434  1.00  0.00      LIG  
ATOM   9523 O    LIG     1     -27.226  21.712 -57.305  1.00  0.00      LIG  
ATOM   9524 N    LIG     1     -26.846  22.253 -55.101  1.00  0.00      LIG  
ATOM   9525 C2   LIG     1     -26.730  20.880 -54.618  1.00  0.00      LIG  
ATOM   9526 C3   LIG     1     -25.259  20.758 -54.270  1.00  0.00      LIG  
ATOM   9527 O1   LIG     1     -24.702  19.679 -54.138  1.00  0.00      LIG  
ATOM   9528 C4   LIG     1     -27.737  20.607 -53.473  1.00  0.00      LIG  
ATOM   9529 C5   LIG     1     -29.041  20.021 -54.047  1.00  0.00      LIG  
ATOM   9530 C6   LIG     1     -30.178  19.945 -53.020  1.00  0.00      LIG  
ATOM   9531 C7   LIG     1     -31.493  19.471 -53.638  1.00  0.00      LIG  
ATOM   9532 O2   LIG     1     -31.318  18.260 -54.366  1.00  0.00      LIG  
ATOM   9533 O3   LIG     1     -29.852  19.078 -51.938  1.00  0.00      LIG  
ATOM   9534 O4   LIG     1     -29.501  20.822 -55.135  1.00  0.00      LIG  
ATOM   9535 O5   LIG     1     -27.215  19.706 -52.493  1.00  0.00      LIG  
ATOM   9536 H    LIG     1     -26.389  24.205 -57.587  1.00  0.00      LIG  
ATOM   9537 H1   LIG     1     -26.654  24.594 -55.873  1.00  0.00      LIG  
ATOM   9538 H2   LIG     1     -28.054  24.330 -56.945  1.00  0.00      LIG  
ATOM   9539 H3   LIG     1     -26.655  23.020 -54.459  1.00  0.00      LIG  
ATOM   9540 H4   LIG     1     -26.905  20.175 -55.437  1.00  0.00      LIG  
ATOM   9541 H5   LIG     1     -24.781  21.660 -53.859  1.00  0.00      LIG  
ATOM   9542 H6   LIG     1     -27.966  21.543 -52.954  1.00  0.00      LIG  
ATOM   9543 H7   LIG     1     -28.832  19.015 -54.424  1.00  0.00      LIG  
ATOM   9544 H8   LIG     1     -30.347  20.938 -52.596  1.00  0.00      LIG  
ATOM   9545 H9   LIG     1     -31.892  20.221 -54.325  1.00  0.00      LIG  
ATOM   9546 H10  LIG     1     -32.239  19.282 -52.861  1.00  0.00      LIG  
ATOM   9547 H11  LIG     1     -30.874  17.631 -53.773  1.00  0.00      LIG  
ATOM   9548 H12  LIG     1     -29.651  18.194 -52.301  1.00  0.00      LIG  
ATOM   9549 H13  LIG     1     -28.762  20.908 -55.763  1.00  0.00      LIG  
ATOM   9550 H14  LIG     1     -27.966  19.459 -51.921  1.00  0.00      LIG  
TER
REMARK  Energy: 4.01368
REMARK  SimpleFitness: 4.01368
REMARK  FullFitness: -2630.1084
REMARK  InterFull: -31.0719
REMARK  IntraFull: 65.7695
REMARK  solvFull: -3067.79
REMARK  surfFull: 402.984
REMARK  extraFull: 0.0
REMARK  deltaGcompsolvpol: -3067.79
REMARK  deltaGcompsolvnonpol: 402.984
REMARK  deltaGprotsolvpol: -3070.97
REMARK  deltaGprotsolvnonpol: 403.01
REMARK  deltaGligsolvpol: -19.1438
REMARK  deltaGligsolvnonpol: 6.6539
REMARK  deltaGvdw: -31.0719
REMARK  deltaGelec: 0.0
REMARK  deltaG: -6.195108
REMARK  Cluster: 17
REMARK  ClusterRank: 5
ATOM   9521 C    LIG     1     -25.999  23.836 -56.270  1.00  0.00      LIG  
ATOM   9522 C1   LIG     1     -27.039  22.777 -56.059  1.00  0.00      LIG  
ATOM   9523 O    LIG     1     -28.192  22.914 -56.428  1.00  0.00      LIG  
ATOM   9524 N    LIG     1     -26.524  21.635 -55.499  1.00  0.00      LIG  
ATOM   9525 C2   LIG     1     -27.340  20.461 -55.252  1.00  0.00      LIG  
ATOM   9526 C3   LIG     1     -26.373  19.313 -55.122  1.00  0.00      LIG  
ATOM   9527 O1   LIG     1     -25.161  19.435 -55.001  1.00  0.00      LIG  
ATOM   9528 C4   LIG     1     -28.261  20.599 -54.024  1.00  0.00      LIG  
ATOM   9529 C5   LIG     1     -29.194  19.396 -53.847  1.00  0.00      LIG  
ATOM   9530 C6   LIG     1     -30.226  19.621 -52.728  1.00  0.00      LIG  
ATOM   9531 C7   LIG     1     -31.271  20.704 -53.003  1.00  0.00      LIG  
ATOM   9532 O2   LIG     1     -32.090  20.421 -54.133  1.00  0.00      LIG  
ATOM   9533 O3   LIG     1     -30.903  18.398 -52.433  1.00  0.00      LIG  
ATOM   9534 O4   LIG     1     -29.829  19.091 -55.085  1.00  0.00      LIG  
ATOM   9535 O5   LIG     1     -27.501  20.765 -52.823  1.00  0.00      LIG  
ATOM   9536 H    LIG     1     -26.381  24.780 -55.874  1.00  0.00      LIG  
ATOM   9537 H1   LIG     1     -25.801  23.928 -57.341  1.00  0.00      LIG  
ATOM   9538 H2   LIG     1     -25.064  23.592 -55.755  1.00  0.00      LIG  
ATOM   9539 H3   LIG     1     -25.548  21.613 -55.219  1.00  0.00      LIG  
ATOM   9540 H4   LIG     1     -27.930  20.291 -56.155  1.00  0.00      LIG  
ATOM   9541 H5   LIG     1     -26.829  18.315 -55.111  1.00  0.00      LIG  
ATOM   9542 H6   LIG     1     -28.851  21.508 -54.162  1.00  0.00      LIG  
ATOM   9543 H7   LIG     1     -28.602  18.517 -53.583  1.00  0.00      LIG  
ATOM   9544 H8   LIG     1     -29.692  19.902 -51.818  1.00  0.00      LIG  
ATOM   9545 H9   LIG     1     -30.788  21.669 -53.167  1.00  0.00      LIG  
ATOM   9546 H10  LIG     1     -31.938  20.798 -52.142  1.00  0.00      LIG  
ATOM   9547 H11  LIG     1     -31.494  20.073 -54.820  1.00  0.00      LIG  
ATOM   9548 H12  LIG     1     -30.211  17.730 -52.267  1.00  0.00      LIG  
ATOM   9549 H13  LIG     1     -30.387  18.311 -54.915  1.00  0.00      LIG  
ATOM   9550 H14  LIG     1     -28.129  20.945 -52.103  1.00  0.00      LIG  
TER
REMARK  Energy: 6.18862
REMARK  SimpleFitness: 6.18862
REMARK  FullFitness: -2629.7085
REMARK  InterFull: -35.4002
REMARK  IntraFull: 69.8036
REMARK  solvFull: -3067.15
REMARK  surfFull: 403.038
REMARK  extraFull: 0.0
REMARK  deltaGcompsolvpol: -3067.15
REMARK  deltaGcompsolvnonpol: 403.038
REMARK  deltaGprotsolvpol: -3070.97
REMARK  deltaGprotsolvnonpol: 403.01
REMARK  deltaGligsolvpol: -18.8604
REMARK  deltaGligsolvnonpol: 6.49616
REMARK  deltaGvdw: -35.4002
REMARK  deltaGelec: 0.0
REMARK  deltaG: -6.5627036
REMARK  Cluster: 17
REMARK  ClusterRank: 6
ATOM   9521 C    LIG     1     -27.003  24.132 -56.715  1.00  0.00      LIG  
ATOM   9522 C1   LIG     1     -26.954  22.663 -56.420  1.00  0.00      LIG  
ATOM   9523 O    LIG     1     -27.080  21.821 -57.295  1.00  0.00      LIG  
ATOM   9524 N    LIG     1     -26.814  22.381 -55.079  1.00  0.00      LIG  
ATOM   9525 C2   LIG     1     -26.638  21.017 -54.585  1.00  0.00      LIG  
ATOM   9526 C3   LIG     1     -25.159  20.978 -54.226  1.00  0.00      LIG  
ATOM   9527 O1   LIG     1     -24.625  20.037 -53.659  1.00  0.00      LIG  
ATOM   9528 C4   LIG     1     -27.664  20.691 -53.468  1.00  0.00      LIG  
ATOM   9529 C5   LIG     1     -28.949  20.094 -54.072  1.00  0.00      LIG  
ATOM   9530 C6   LIG     1     -30.100  19.993 -53.061  1.00  0.00      LIG  
ATOM   9531 C7   LIG     1     -31.404  19.517 -53.701  1.00  0.00      LIG  
ATOM   9532 O2   LIG     1     -31.211  18.319 -54.448  1.00  0.00      LIG  
ATOM   9533 O3   LIG     1     -29.781  19.116 -51.984  1.00  0.00      LIG  
ATOM   9534 O4   LIG     1     -29.405  20.897 -55.159  1.00  0.00      LIG  
ATOM   9535 O5   LIG     1     -27.152  19.777 -52.497  1.00  0.00      LIG  
ATOM   9536 H    LIG     1     -26.360  24.339 -57.575  1.00  0.00      LIG  
ATOM   9537 H1   LIG     1     -26.650  24.724 -55.865  1.00  0.00      LIG  
ATOM   9538 H2   LIG     1     -28.033  24.413 -56.946  1.00  0.00      LIG  
ATOM   9539 H3   LIG     1     -26.667  23.158 -54.435  1.00  0.00      LIG  
ATOM   9540 H4   LIG     1     -26.759  20.314 -55.415  1.00  0.00      LIG  
ATOM   9541 H5   LIG     1     -24.508  21.640 -54.822  1.00  0.00      LIG  
ATOM   9542 H6   LIG     1     -27.919  21.611 -52.932  1.00  0.00      LIG  
ATOM   9543 H7   LIG     1     -28.720  19.095 -54.455  1.00  0.00      LIG  
ATOM   9544 H8   LIG     1     -30.283  20.979 -52.626  1.00  0.00      LIG  
ATOM   9545 H9   LIG     1     -31.802  20.274 -54.380  1.00  0.00      LIG  
ATOM   9546 H10  LIG     1     -32.157  19.309 -52.936  1.00  0.00      LIG  
ATOM   9547 H11  LIG     1     -30.775  17.681 -53.858  1.00  0.00      LIG  
ATOM   9548 H12  LIG     1     -29.590  18.232 -52.353  1.00  0.00      LIG  
ATOM   9549 H13  LIG     1     -28.652  21.014 -55.765  1.00  0.00      LIG  
ATOM   9550 H14  LIG     1     -27.907  19.522 -51.937  1.00  0.00      LIG  
TER
REMARK  Energy: 16.6336
REMARK  SimpleFitness: 16.6336
REMARK  FullFitness: -2614.905
REMARK  InterFull: -16.6761
REMARK  IntraFull: 74.6371
REMARK  solvFull: -3075.73
REMARK  surfFull: 402.864
REMARK  extraFull: 0.0
REMARK  deltaGcompsolvpol: -3075.73
REMARK  deltaGcompsolvnonpol: 402.864
REMARK  deltaGprotsolvpol: -3070.97
REMARK  deltaGprotsolvnonpol: 403.01
REMARK  deltaGligsolvpol: -20.0411
REMARK  deltaGligsolvnonpol: 7.13482
REMARK  deltaGvdw: -16.6761
REMARK  deltaGelec: 0.0
REMARK  deltaG: -5.3211217
REMARK  Cluster: 17
REMARK  ClusterRank: 7
ATOM   9521 C    LIG     1     -28.631  22.928 -57.357  1.00  0.00      LIG  
ATOM   9522 C1   LIG     1     -28.305  22.360 -56.011  1.00  0.00      LIG  
ATOM   9523 O    LIG     1     -28.270  23.056 -55.008  1.00  0.00      LIG  
ATOM   9524 N    LIG     1     -28.020  21.009 -56.051  1.00  0.00      LIG  
ATOM   9525 C2   LIG     1     -27.700  20.182 -54.890  1.00  0.00      LIG  
ATOM   9526 C3   LIG     1     -26.291  20.550 -54.456  1.00  0.00      LIG  
ATOM   9527 O1   LIG     1     -25.681  19.935 -53.597  1.00  0.00      LIG  
ATOM   9528 C4   LIG     1     -28.701  20.265 -53.714  1.00  0.00      LIG  
ATOM   9529 C5   LIG     1     -30.200  20.350 -54.100  1.00  0.00      LIG  
ATOM   9530 C6   LIG     1     -30.952  19.090 -54.575  1.00  0.00      LIG  
ATOM   9531 C7   LIG     1     -30.420  18.569 -55.904  1.00  0.00      LIG  
ATOM   9532 O2   LIG     1     -31.386  17.742 -56.540  1.00  0.00      LIG  
ATOM   9533 O3   LIG     1     -30.946  18.041 -53.604  1.00  0.00      LIG  
ATOM   9534 O4   LIG     1     -30.906  20.876 -52.977  1.00  0.00      LIG  
ATOM   9535 O5   LIG     1     -28.480  19.152 -52.850  1.00  0.00      LIG  
ATOM   9536 H    LIG     1     -27.766  23.485 -57.725  1.00  0.00      LIG  
ATOM   9537 H1   LIG     1     -29.488  23.599 -57.254  1.00  0.00      LIG  
ATOM   9538 H2   LIG     1     -28.891  22.141 -58.072  1.00  0.00      LIG  
ATOM   9539 H3   LIG     1     -28.026  20.558 -56.962  1.00  0.00      LIG  
ATOM   9540 H4   LIG     1     -27.636  19.153 -55.251  1.00  0.00      LIG  
ATOM   9541 H5   LIG     1     -25.932  21.548 -54.763  1.00  0.00      LIG  
ATOM   9542 H6   LIG     1     -28.458  21.154 -53.121  1.00  0.00      LIG  
ATOM   9543 H7   LIG     1     -30.321  21.102 -54.879  1.00  0.00      LIG  
ATOM   9544 H8   LIG     1     -32.008  19.350 -54.699  1.00  0.00      LIG  
ATOM   9545 H9   LIG     1     -29.514  17.974 -55.761  1.00  0.00      LIG  
ATOM   9546 H10  LIG     1     -30.208  19.400 -56.582  1.00  0.00      LIG  
ATOM   9547 H11  LIG     1     -32.248  18.177 -56.425  1.00  0.00      LIG  
ATOM   9548 H12  LIG     1     -30.015  17.844 -53.394  1.00  0.00      LIG  
ATOM   9549 H13  LIG     1     -30.439  21.687 -52.717  1.00  0.00      LIG  
ATOM   9550 H14  LIG     1     -29.147  19.206 -52.142  1.00  0.00      LIG  
TER
REMARK  Energy: 4.51066
REMARK  SimpleFitness: 4.51066
REMARK  FullFitness: -2631.9937
REMARK  InterFull: -37.9413
REMARK  IntraFull: 73.2478
REMARK  solvFull: -3070.01
REMARK  surfFull: 402.71
REMARK  extraFull: 0.0
REMARK  deltaGcompsolvpol: -3070.01
REMARK  deltaGcompsolvnonpol: 402.71
REMARK  deltaGprotsolvpol: -3070.97
REMARK  deltaGprotsolvnonpol: 403.01
REMARK  deltaGligsolvpol: -20.7246
REMARK  deltaGligsolvnonpol: 6.84423
REMARK  deltaGvdw: -37.9413
REMARK  deltaGelec: 0.0
REMARK  deltaG: -6.9279976
REMARK  Cluster: 18
REMARK  ClusterRank: 0
ATOM   9521 C    LIG     1     -27.450  21.306 -53.733  1.00  0.00      LIG  
ATOM   9522 C1   LIG     1     -27.536  20.155 -52.772  1.00  0.00      LIG  
ATOM   9523 O    LIG     1     -26.665  19.958 -51.941  1.00  0.00      LIG  
ATOM   9524 N    LIG     1     -28.653  19.348 -52.878  1.00  0.00      LIG  
ATOM   9525 C2   LIG     1     -29.722  19.457 -53.870  1.00  0.00      LIG  
ATOM   9526 C3   LIG     1     -29.308  18.556 -55.024  1.00  0.00      LIG  
ATOM   9527 O1   LIG     1     -28.148  18.354 -55.357  1.00  0.00      LIG  
ATOM   9528 C4   LIG     1     -31.085  19.110 -53.224  1.00  0.00      LIG  
ATOM   9529 C5   LIG     1     -32.303  19.675 -53.972  1.00  0.00      LIG  
ATOM   9530 C6   LIG     1     -32.442  21.183 -53.757  1.00  0.00      LIG  
ATOM   9531 C7   LIG     1     -33.543  21.803 -54.613  1.00  0.00      LIG  
ATOM   9532 O2   LIG     1     -34.753  21.060 -54.515  1.00  0.00      LIG  
ATOM   9533 O3   LIG     1     -32.712  21.436 -52.380  1.00  0.00      LIG  
ATOM   9534 O4   LIG     1     -32.223  19.405 -55.368  1.00  0.00      LIG  
ATOM   9535 O5   LIG     1     -31.262  17.700 -53.061  1.00  0.00      LIG  
ATOM   9536 H    LIG     1     -26.457  21.753 -53.655  1.00  0.00      LIG  
ATOM   9537 H1   LIG     1     -28.205  22.055 -53.479  1.00  0.00      LIG  
ATOM   9538 H2   LIG     1     -27.586  20.963 -54.762  1.00  0.00      LIG  
ATOM   9539 H3   LIG     1     -28.664  18.532 -52.272  1.00  0.00      LIG  
ATOM   9540 H4   LIG     1     -29.774  20.475 -54.259  1.00  0.00      LIG  
ATOM   9541 H5   LIG     1     -30.114  18.261 -55.710  1.00  0.00      LIG  
ATOM   9542 H6   LIG     1     -31.106  19.517 -52.209  1.00  0.00      LIG  
ATOM   9543 H7   LIG     1     -33.203  19.173 -53.606  1.00  0.00      LIG  
ATOM   9544 H8   LIG     1     -31.508  21.695 -54.003  1.00  0.00      LIG  
ATOM   9545 H9   LIG     1     -33.247  21.821 -55.665  1.00  0.00      LIG  
ATOM   9546 H10  LIG     1     -33.754  22.826 -54.292  1.00  0.00      LIG  
ATOM   9547 H11  LIG     1     -34.947  20.976 -53.567  1.00  0.00      LIG  
ATOM   9548 H12  LIG     1     -33.349  20.762 -52.078  1.00  0.00      LIG  
ATOM   9549 H13  LIG     1     -32.236  18.437 -55.460  1.00  0.00      LIG  
ATOM   9550 H14  LIG     1     -30.451  17.353 -52.641  1.00  0.00      LIG  
TER
REMARK  Energy: 4.35293
REMARK  SimpleFitness: 4.35293
REMARK  FullFitness: -2631.001
REMARK  InterFull: -32.5119
REMARK  IntraFull: 69.0368
REMARK  solvFull: -3070.42
REMARK  surfFull: 402.894
REMARK  extraFull: 0.0
REMARK  deltaGcompsolvpol: -3070.42
REMARK  deltaGcompsolvnonpol: 402.894
REMARK  deltaGprotsolvpol: -3070.97
REMARK  deltaGprotsolvnonpol: 403.01
REMARK  deltaGligsolvpol: -20.0795
REMARK  deltaGligsolvnonpol: 6.69388
REMARK  deltaGvdw: -32.5119
REMARK  deltaGelec: 0.0
REMARK  deltaG: -6.447312
REMARK  Cluster: 18
REMARK  ClusterRank: 1
ATOM   9521 C    LIG     1     -27.303  19.980 -52.281  1.00  0.00      LIG  
ATOM   9522 C1   LIG     1     -28.596  20.335 -52.937  1.00  0.00      LIG  
ATOM   9523 O    LIG     1     -29.113  21.433 -52.801  1.00  0.00      LIG  
ATOM   9524 N    LIG     1     -29.084  19.333 -53.737  1.00  0.00      LIG  
ATOM   9525 C2   LIG     1     -30.324  19.492 -54.476  1.00  0.00      LIG  
ATOM   9526 C3   LIG     1     -30.201  18.493 -55.612  1.00  0.00      LIG  
ATOM   9527 O1   LIG     1     -31.155  18.079 -56.255  1.00  0.00      LIG  
ATOM   9528 C4   LIG     1     -31.554  19.341 -53.555  1.00  0.00      LIG  
ATOM   9529 C5   LIG     1     -32.792  20.114 -54.043  1.00  0.00      LIG  
ATOM   9530 C6   LIG     1     -32.762  21.554 -53.530  1.00  0.00      LIG  
ATOM   9531 C7   LIG     1     -33.931  22.384 -54.044  1.00  0.00      LIG  
ATOM   9532 O2   LIG     1     -33.636  22.925 -55.325  1.00  0.00      LIG  
ATOM   9533 O3   LIG     1     -32.840  21.527 -52.109  1.00  0.00      LIG  
ATOM   9534 O4   LIG     1     -32.881  20.105 -55.463  1.00  0.00      LIG  
ATOM   9535 O5   LIG     1     -31.889  17.971 -53.338  1.00  0.00      LIG  
ATOM   9536 H    LIG     1     -27.396  20.153 -51.209  1.00  0.00      LIG  
ATOM   9537 H1   LIG     1     -26.509  20.613 -52.683  1.00  0.00      LIG  
ATOM   9538 H2   LIG     1     -27.047  18.932 -52.451  1.00  0.00      LIG  
ATOM   9539 H3   LIG     1     -28.635  18.423 -53.699  1.00  0.00      LIG  
ATOM   9540 H4   LIG     1     -30.308  20.495 -54.908  1.00  0.00      LIG  
ATOM   9541 H5   LIG     1     -29.197  18.412 -56.058  1.00  0.00      LIG  
ATOM   9542 H6   LIG     1     -31.303  19.709 -52.558  1.00  0.00      LIG  
ATOM   9543 H7   LIG     1     -33.697  19.624 -53.675  1.00  0.00      LIG  
ATOM   9544 H8   LIG     1     -31.819  22.031 -53.814  1.00  0.00      LIG  
ATOM   9545 H9   LIG     1     -34.144  23.221 -53.374  1.00  0.00      LIG  
ATOM   9546 H10  LIG     1     -34.835  21.775 -54.115  1.00  0.00      LIG  
ATOM   9547 H11  LIG     1     -34.370  23.522 -55.548  1.00  0.00      LIG  
ATOM   9548 H12  LIG     1     -33.522  20.874 -51.865  1.00  0.00      LIG  
ATOM   9549 H13  LIG     1     -32.647  19.205 -55.756  1.00  0.00      LIG  
ATOM   9550 H14  LIG     1     -31.069  17.520 -53.065  1.00  0.00      LIG  
TER
REMARK  Energy: 5.6153
REMARK  SimpleFitness: 5.6153
REMARK  FullFitness: -2628.599
REMARK  InterFull: -27.8427
REMARK  IntraFull: 68.6887
REMARK  solvFull: -3072.49
REMARK  surfFull: 403.045
REMARK  extraFull: 0.0
REMARK  deltaGcompsolvpol: -3072.49
REMARK  deltaGcompsolvnonpol: 403.045
REMARK  deltaGprotsolvpol: -3070.97
REMARK  deltaGprotsolvnonpol: 403.01
REMARK  deltaGligsolvpol: -19.8725
REMARK  deltaGligsolvnonpol: 6.70946
REMARK  deltaGvdw: -27.8427
REMARK  deltaGelec: 0.0
REMARK  deltaG: -6.132151
REMARK  Cluster: 18
REMARK  ClusterRank: 2
ATOM   9521 C    LIG     1     -26.998  19.962 -52.584  1.00  0.00      LIG  
ATOM   9522 C1   LIG     1     -28.341  20.361 -53.104  1.00  0.00      LIG  
ATOM   9523 O    LIG     1     -28.936  21.343 -52.690  1.00  0.00      LIG  
ATOM   9524 N    LIG     1     -28.792  19.529 -54.101  1.00  0.00      LIG  
ATOM   9525 C2   LIG     1     -30.063  19.764 -54.761  1.00  0.00      LIG  
ATOM   9526 C3   LIG     1     -29.883  19.098 -56.116  1.00  0.00      LIG  
ATOM   9527 O1   LIG     1     -30.814  18.789 -56.843  1.00  0.00      LIG  
ATOM   9528 C4   LIG     1     -31.247  19.280 -53.888  1.00  0.00      LIG  
ATOM   9529 C5   LIG     1     -32.541  20.076 -54.117  1.00  0.00      LIG  
ATOM   9530 C6   LIG     1     -32.516  21.386 -53.324  1.00  0.00      LIG  
ATOM   9531 C7   LIG     1     -33.759  22.238 -53.556  1.00  0.00      LIG  
ATOM   9532 O2   LIG     1     -33.594  23.082 -54.689  1.00  0.00      LIG  
ATOM   9533 O3   LIG     1     -32.464  21.062 -51.941  1.00  0.00      LIG  
ATOM   9534 O4   LIG     1     -32.732  20.349 -55.501  1.00  0.00      LIG  
ATOM   9535 O5   LIG     1     -31.510  17.886 -54.051  1.00  0.00      LIG  
ATOM   9536 H    LIG     1     -27.085  19.721 -51.523  1.00  0.00      LIG  
ATOM   9537 H1   LIG     1     -26.308  20.795 -52.727  1.00  0.00      LIG  
ATOM   9538 H2   LIG     1     -26.601  19.094 -53.119  1.00  0.00      LIG  
ATOM   9539 H3   LIG     1     -28.250  18.703 -54.330  1.00  0.00      LIG  
ATOM   9540 H4   LIG     1     -30.131  20.844 -54.922  1.00  0.00      LIG  
ATOM   9541 H5   LIG     1     -28.886  19.229 -56.574  1.00  0.00      LIG  
ATOM   9542 H6   LIG     1     -30.978  19.381 -52.834  1.00  0.00      LIG  
ATOM   9543 H7   LIG     1     -33.394  19.473 -53.788  1.00  0.00      LIG  
ATOM   9544 H8   LIG     1     -31.621  21.961 -53.577  1.00  0.00      LIG  
ATOM   9545 H9   LIG     1     -33.967  22.878 -52.691  1.00  0.00      LIG  
ATOM   9546 H10  LIG     1     -34.634  21.605 -53.715  1.00  0.00      LIG  
ATOM   9547 H11  LIG     1     -32.767  23.573 -54.551  1.00  0.00      LIG  
ATOM   9548 H12  LIG     1     -33.234  20.490 -51.754  1.00  0.00      LIG  
ATOM   9549 H13  LIG     1     -32.434  19.557 -55.986  1.00  0.00      LIG  
ATOM   9550 H14  LIG     1     -30.676  17.417 -53.867  1.00  0.00      LIG  
TER
REMARK  Energy: 5.89079
REMARK  SimpleFitness: 5.89079
REMARK  FullFitness: -2628.3318
REMARK  InterFull: -28.4833
REMARK  IntraFull: 68.7236
REMARK  solvFull: -3071.75
REMARK  surfFull: 403.178
REMARK  extraFull: 0.0
REMARK  deltaGcompsolvpol: -3071.75
REMARK  deltaGcompsolvnonpol: 403.178
REMARK  deltaGprotsolvpol: -3070.97
REMARK  deltaGprotsolvnonpol: 403.01
REMARK  deltaGligsolvpol: -20.4335
REMARK  deltaGligsolvnonpol: 6.74017
REMARK  deltaGvdw: -28.4833
REMARK  deltaGelec: 0.0
REMARK  deltaG: -6.103455
REMARK  Cluster: 18
REMARK  ClusterRank: 3
ATOM   9521 C    LIG     1     -26.851  19.973 -52.739  1.00  0.00      LIG  
ATOM   9522 C1   LIG     1     -28.216  20.400 -53.178  1.00  0.00      LIG  
ATOM   9523 O    LIG     1     -28.833  21.285 -52.607  1.00  0.00      LIG  
ATOM   9524 N    LIG     1     -28.643  19.745 -54.310  1.00  0.00      LIG  
ATOM   9525 C2   LIG     1     -29.931  20.046 -54.912  1.00  0.00      LIG  
ATOM   9526 C3   LIG     1     -29.739  19.725 -56.382  1.00  0.00      LIG  
ATOM   9527 O1   LIG     1     -30.670  19.569 -57.160  1.00  0.00      LIG  
ATOM   9528 C4   LIG     1     -31.083  19.316 -54.179  1.00  0.00      LIG  
ATOM   9529 C5   LIG     1     -32.391  20.119 -54.168  1.00  0.00      LIG  
ATOM   9530 C6   LIG     1     -32.319  21.264 -53.156  1.00  0.00      LIG  
ATOM   9531 C7   LIG     1     -33.589  22.107 -53.153  1.00  0.00      LIG  
ATOM   9532 O2   LIG     1     -33.491  23.165 -54.098  1.00  0.00      LIG  
ATOM   9533 O3   LIG     1     -32.141  20.701 -51.859  1.00  0.00      LIG  
ATOM   9534 O4   LIG     1     -32.679  20.633 -55.465  1.00  0.00      LIG  
ATOM   9535 O5   LIG     1     -31.339  18.014 -54.710  1.00  0.00      LIG  
ATOM   9536 H    LIG     1     -26.888  19.694 -51.683  1.00  0.00      LIG  
ATOM   9537 H1   LIG     1     -26.157  20.804 -52.882  1.00  0.00      LIG  
ATOM   9538 H2   LIG     1     -26.494  19.119 -53.321  1.00  0.00      LIG  
ATOM   9539 H3   LIG     1     -28.082  18.983 -54.675  1.00  0.00      LIG  
ATOM   9540 H4   LIG     1     -30.060  21.130 -54.834  1.00  0.00      LIG  
ATOM   9541 H5   LIG     1     -28.754  19.996 -56.796  1.00  0.00      LIG  
ATOM   9542 H6   LIG     1     -30.794  19.135 -53.140  1.00  0.00      LIG  
ATOM   9543 H7   LIG     1     -33.216  19.451 -53.898  1.00  0.00      LIG  
ATOM   9544 H8   LIG     1     -31.458  21.903 -53.372  1.00  0.00      LIG  
ATOM   9545 H9   LIG     1     -33.766  22.552 -52.168  1.00  0.00      LIG  
ATOM   9546 H10  LIG     1     -34.454  21.492 -53.410  1.00  0.00      LIG
[truncated: 333,913 more chars]
