# Supplementary material for: Genetic Uniformity of a Specific Region in SARS-CoV-2 Genome and In-Silico Target-Oriented Repurposing of N-Acetyl-D-Glucosamine
Source: Preprints.org preprint supplement (doi:10.20944/preprints202005.0397.v1), 2020-05-24
Supplement: Supplementary file 7 [file supplementary › S6 File/complex.psf]

PSF CMAP CHEQ

       2 !NTITLE
* PYCHARMM PSF                                                                  
*  DATE:     5/ 6/20     14:17:51      CREATED BY USER: root                    

    9550 !NATOM
       1 1S   19   SER  N      56  -0.300000       14.0070           0   0.00000     -0.301140E-02
       2 1S   19   SER  HT1     2   0.330000       1.00800           0   0.00000     -0.301140E-02
       3 1S   19   SER  HT2     2   0.330000       1.00800           0   0.00000     -0.301140E-02
       4 1S   19   SER  HT3     2   0.330000       1.00800           0   0.00000     -0.301140E-02
       5 1S   19   SER  CA     22   0.210000       12.0110           0   0.00000     -0.301140E-02
       6 1S   19   SER  HA      6   0.100000       1.00800           0   0.00000     -0.301140E-02
       7 1S   19   SER  CB     23   0.500000E-01   12.0110           0   0.00000     -0.301140E-02
       8 1S   19   SER  HB1     3   0.900000E-01   1.00800           0   0.00000     -0.301140E-02
       9 1S   19   SER  HB2     3   0.900000E-01   1.00800           0   0.00000     -0.301140E-02
      10 1S   19   SER  OG     73  -0.660000       15.9990           0   0.00000     -0.301140E-02
      11 1S   19   SER  HG1     1   0.430000       1.00800           0   0.00000     -0.301140E-02
      12 1S   19   SER  C      20   0.510000       12.0110           0   0.00000     -0.301140E-02
      13 1S   19   SER  O      70  -0.510000       15.9990           0   0.00000     -0.301140E-02
      14 1S   20   THR  N      54  -0.470000       14.0070           0   0.00000     -0.301140E-02
      15 1S   20   THR  HN      1   0.310000       1.00800           0   0.00000     -0.301140E-02
      16 1S   20   THR  CA     22   0.700000E-01   12.0110           0   0.00000     -0.301140E-02
      17 1S   20   THR  HA      6   0.900000E-01   1.00800           0   0.00000     -0.301140E-02
      18 1S   20   THR  CB     22   0.140000       12.0110           0   0.00000     -0.301140E-02
      19 1S   20   THR  HB      3   0.900000E-01   1.00800           0   0.00000     -0.301140E-02
      20 1S   20   THR  OG1    73  -0.660000       15.9990           0   0.00000     -0.301140E-02
      21 1S   20   THR  HG1     1   0.430000       1.00800           0   0.00000     -0.301140E-02
      22 1S   20   THR  CG2    24  -0.270000       12.0110           0   0.00000     -0.301140E-02
      23 1S   20   THR  HG21    3   0.900000E-01   1.00800           0   0.00000     -0.301140E-02
      24 1S   20   THR  HG22    3   0.900000E-01   1.00800           0   0.00000     -0.301140E-02
      25 1S   20   THR  HG23    3   0.900000E-01   1.00800           0   0.00000     -0.301140E-02
      26 1S   20   THR  C      20   0.510000       12.0110           0   0.00000     -0.301140E-02
      27 1S   20   THR  O      70  -0.510000       15.9990           0   0.00000     -0.301140E-02
      28 1S   21   ILE  N      54  -0.470000       14.0070           0   0.00000     -0.301140E-02
      29 1S   21   ILE  HN      1   0.310000       1.00800           0   0.00000     -0.301140E-02
      30 1S   21   ILE  CA     22   0.700000E-01   12.0110           0   0.00000     -0.301140E-02
      31 1S   21   ILE  HA      6   0.900000E-01   1.00800           0   0.00000     -0.301140E-02
      32 1S   21   ILE  CB     22  -0.900000E-01   12.0110           0   0.00000     -0.301140E-02
      33 1S   21   ILE  HB      3   0.900000E-01   1.00800           0   0.00000     -0.301140E-02
      34 1S   21   ILE  CG2    24  -0.270000       12.0110           0   0.00000     -0.301140E-02
      35 1S   21   ILE  HG21    3   0.900000E-01   1.00800           0   0.00000     -0.301140E-02
      36 1S   21   ILE  HG22    3   0.900000E-01   1.00800           0   0.00000     -0.301140E-02
      37 1S   21   ILE  HG23    3   0.900000E-01   1.00800           0   0.00000     -0.301140E-02
      38 1S   21   ILE  CG1    23  -0.180000       12.0110           0   0.00000     -0.301140E-02
      39 1S   21   ILE  HG11    3   0.900000E-01   1.00800           0   0.00000     -0.301140E-02
      40 1S   21   ILE  HG12    3   0.900000E-01   1.00800           0   0.00000     -0.301140E-02
      41 1S   21   ILE  CD     24  -0.270000       12.0110           0   0.00000     -0.301140E-02
      42 1S   21   ILE  HD1     3   0.900000E-01   1.00800           0   0.00000     -0.301140E-02
      43 1S   21   ILE  HD2     3   0.900000E-01   1.00800           0   0.00000     -0.301140E-02
      44 1S   21   ILE  HD3     3   0.900000E-01   1.00800           0   0.00000     -0.301140E-02
      45 1S   21   ILE  C      20   0.510000       12.0110           0   0.00000     -0.301140E-02
      46 1S   21   ILE  O      70  -0.510000       15.9990           0   0.00000     -0.301140E-02
      47 1S   22   GLU  N      54  -0.470000       14.0070           0   0.00000     -0.301140E-02
      48 1S   22   GLU  HN      1   0.310000       1.00800           0   0.00000     -0.301140E-02
      49 1S   22   GLU  CA     22   0.700000E-01   12.0110           0   0.00000     -0.301140E-02
      50 1S   22   GLU  HA      6   0.900000E-01   1.00800           0   0.00000     -0.301140E-02
      51 1S   22   GLU  CB     23  -0.180000       12.0110           0   0.00000     -0.301140E-02
      52 1S   22   GLU  HB1     3   0.900000E-01   1.00800           0   0.00000     -0.301140E-02
      53 1S   22   GLU  HB2     3   0.900000E-01   1.00800           0   0.00000     -0.301140E-02
      54 1S   22   GLU  CG     23  -0.280000       12.0110           0   0.00000     -0.301140E-02
      55 1S   22   GLU  HG1     3   0.900000E-01   1.00800           0   0.00000     -0.301140E-02
      56 1S   22   GLU  HG2     3   0.900000E-01   1.00800           0   0.00000     -0.301140E-02
      57 1S   22   GLU  CD     32   0.620000       12.0110           0   0.00000     -0.301140E-02
      58 1S   22   GLU  OE1    72  -0.760000       15.9990           0   0.00000     -0.301140E-02
      59 1S   22   GLU  OE2    72  -0.760000       15.9990           0   0.00000     -0.301140E-02
      60 1S   22   GLU  C      20   0.510000       12.0110           0   0.00000     -0.301140E-02
      61 1S   22   GLU  O      70  -0.510000       15.9990           0   0.00000     -0.301140E-02
      62 1S   23   GLU  N      54  -0.470000       14.0070           0   0.00000     -0.301140E-02
      63 1S   23   GLU  HN      1   0.310000       1.00800           0   0.00000     -0.301140E-02
      64 1S   23   GLU  CA     22   0.700000E-01   12.0110           0   0.00000     -0.301140E-02
      65 1S   23   GLU  HA      6   0.900000E-01   1.00800           0   0.00000     -0.301140E-02
      66 1S   23   GLU  CB     23  -0.180000       12.0110           0   0.00000     -0.301140E-02
      67 1S   23   GLU  HB1     3   0.900000E-01   1.00800           0   0.00000     -0.301140E-02
      68 1S   23   GLU  HB2     3   0.900000E-01   1.00800           0   0.00000     -0.301140E-02
      69 1S   23   GLU  CG     23  -0.280000       12.0110           0   0.00000     -0.301140E-02
      70 1S   23   GLU  HG1     3   0.900000E-01   1.00800           0   0.00000     -0.301140E-02
      71 1S   23   GLU  HG2     3   0.900000E-01   1.00800           0   0.00000     -0.301140E-02
      72 1S   23   GLU  CD     32   0.620000       12.0110           0   0.00000     -0.301140E-02
      73 1S   23   GLU  OE1    72  -0.760000       15.9990           0   0.00000     -0.301140E-02
      74 1S   23   GLU  OE2    72  -0.760000       15.9990           0   0.00000     -0.301140E-02
      75 1S   23   GLU  C      20   0.510000       12.0110           0   0.00000     -0.301140E-02
      76 1S   23   GLU  O      70  -0.510000       15.9990           0   0.00000     -0.301140E-02
      77 1S   24   GLN  N      54  -0.470000       14.0070           0   0.00000     -0.301140E-02
      78 1S   24   GLN  HN      1   0.310000       1.00800           0   0.00000     -0.301140E-02
      79 1S   24   GLN  CA     22   0.700000E-01   12.0110           0   0.00000     -0.301140E-02
      80 1S   24   GLN  HA      6   0.900000E-01   1.00800           0   0.00000     -0.301140E-02
      81 1S   24   GLN  CB     23  -0.180000       12.0110           0   0.00000     -0.301140E-02
      82 1S   24   GLN  HB1     3   0.900000E-01   1.00800           0   0.00000     -0.301140E-02
      83 1S   24   GLN  HB2     3   0.900000E-01   1.00800           0   0.00000     -0.301140E-02
      84 1S   24   GLN  CG     23  -0.180000       12.0110           0   0.00000     -0.301140E-02
      85 1S   24   GLN  HG1     3   0.900000E-01   1.00800           0   0.00000     -0.301140E-02
      86 1S   24   GLN  HG2     3   0.900000E-01   1.00800           0   0.00000     -0.301140E-02
      87 1S   24   GLN  CD     32   0.550000       12.0110           0   0.00000     -0.301140E-02
      88 1S   24   GLN  OE1    70  -0.550000       15.9990           0   0.00000     -0.301140E-02
      89 1S   24   GLN  NE2    55  -0.620000       14.0070           0   0.00000     -0.301140E-02
      90 1S   24   GLN  HE21    1   0.320000       1.00800           0   0.00000     -0.301140E-02
      91 1S   24   GLN  HE22    1   0.300000       1.00800           0   0.00000     -0.301140E-02
      92 1S   24   GLN  C      20   0.510000       12.0110           0   0.00000     -0.301140E-02
      93 1S   24   GLN  O      70  -0.510000       15.9990           0   0.00000     -0.301140E-02
      94 1S   25   ALA  N      54  -0.470000       14.0070           0   0.00000     -0.301140E-02
      95 1S   25   ALA  HN      1   0.310000       1.00800           0   0.00000     -0.301140E-02
      96 1S   25   ALA  CA     22   0.700000E-01   12.0110           0   0.00000     -0.301140E-02
      97 1S   25   ALA  HA      6   0.900000E-01   1.00800           0   0.00000     -0.301140E-02
      98 1S   25   ALA  CB     24  -0.270000       12.0110           0   0.00000     -0.301140E-02
      99 1S   25   ALA  HB1     3   0.900000E-01   1.00800           0   0.00000     -0.301140E-02
     100 1S   25   ALA  HB2     3   0.900000E-01   1.00800           0   0.00000     -0.301140E-02
     101 1S   25   ALA  HB3     3   0.900000E-01   1.00800           0   0.00000     -0.301140E-02
     102 1S   25   ALA  C      20   0.510000       12.0110           0   0.00000     -0.301140E-02
     103 1S   25   ALA  O      70  -0.510000       15.9990           0   0.00000     -0.301140E-02
     104 1S   26   LYS  N      54  -0.470000       14.0070           0   0.00000     -0.301140E-02
     105 1S   26   LYS  HN      1   0.310000       1.00800           0   0.00000     -0.301140E-02
     106 1S   26   LYS  CA     22   0.700000E-01   12.0110           0   0.00000     -0.301140E-02
     107 1S   26   LYS  HA      6   0.900000E-01   1.00800           0   0.00000     -0.301140E-02
     108 1S   26   LYS  CB     23  -0.180000       12.0110           0   0.00000     -0.301140E-02
     109 1S   26   LYS  HB1     3   0.900000E-01   1.00800           0   0.00000     -0.301140E-02
     110 1S   26   LYS  HB2     3   0.900000E-01   1.00800           0   0.00000     -0.301140E-02
     111 1S   26   LYS  CG     23  -0.180000       12.0110           0   0.00000     -0.301140E-02
     112 1S   26   LYS  HG1     3   0.900000E-01   1.00800           0   0.00000     -0.301140E-02
     113 1S   26   LYS  HG2     3   0.900000E-01   1.00800           0   0.00000     -0.301140E-02
     114 1S   26   LYS  CD     23  -0.180000       12.0110           0   0.00000     -0.301140E-02
     115 1S   26   LYS  HD1     3   0.900000E-01   1.00800           0   0.00000     -0.301140E-02
     116 1S   26   LYS  HD2     3   0.900000E-01   1.00800           0   0.00000     -0.301140E-02
     117 1S   26   LYS  CE     23   0.210000       12.0110           0   0.00000     -0.301140E-02
     118 1S   26   LYS  HE1     3   0.500000E-01   1.00800           0   0.00000     -0.301140E-02
     119 1S   26   LYS  HE2     3   0.500000E-01   1.00800           0   0.00000     -0.301140E-02
     120 1S   26   LYS  NZ     56  -0.300000       14.0070           0   0.00000     -0.301140E-02
     121 1S   26   LYS  HZ1     2   0.330000       1.00800           0   0.00000     -0.301140E-02
     122 1S   26   LYS  HZ2     2   0.330000       1.00800           0   0.00000     -0.301140E-02
     123 1S   26   LYS  HZ3     2   0.330000       1.00800           0   0.00000     -0.301140E-02
     124 1S   26   LYS  C      20   0.510000       12.0110           0   0.00000     -0.301140E-02
     125 1S   26   LYS  O      70  -0.510000       15.9990           0   0.00000     -0.301140E-02
     126 1S   27   THR  N      54  -0.470000       14.0070           0   0.00000     -0.301140E-02
     127 1S   27   THR  HN      1   0.310000       1.00800           0   0.00000     -0.301140E-02
     128 1S   27   THR  CA     22   0.700000E-01   12.0110           0   0.00000     -0.301140E-02
     129 1S   27   THR  HA      6   0.900000E-01   1.00800           0   0.00000     -0.301140E-02
     130 1S   27   THR  CB     22   0.140000       12.0110           0   0.00000     -0.301140E-02
     131 1S   27   THR  HB      3   0.900000E-01   1.00800           0   0.00000     -0.301140E-02
     132 1S   27   THR  OG1    73  -0.660000       15.9990           0   0.00000     -0.301140E-02
     133 1S   27   THR  HG1     1   0.430000       1.00800           0   0.00000     -0.301140E-02
     134 1S   27   THR  CG2    24  -0.270000       12.0110           0   0.00000     -0.301140E-02
     135 1S   27   THR  HG21    3   0.900000E-01   1.00800           0   0.00000     -0.301140E-02
     136 1S   27   THR  HG22    3   0.900000E-01   1.00800           0   0.00000     -0.301140E-02
     137 1S   27   THR  HG23    3   0.900000E-01   1.00800           0   0.00000     -0.301140E-02
     138 1S   27   THR  C      20   0.510000       12.0110           0   0.00000     -0.301140E-02
     139 1S   27   THR  O      70  -0.510000       15.9990           0   0.00000     -0.301140E-02
     140 1S   28   PHE  N      54  -0.470000       14.0070           0   0.00000     -0.301140E-02
     141 1S   28   PHE  HN      1   0.310000       1.00800           0   0.00000     -0.301140E-02
     142 1S   28   PHE  CA     22   0.700000E-01   12.0110           0   0.00000     -0.301140E-02
     143 1S   28   PHE  HA      6   0.900000E-01   1.00800           0   0.00000     -0.301140E-02
     144 1S   28   PHE  CB     23  -0.180000       12.0110           0   0.00000     -0.301140E-02
     145 1S   28   PHE  HB1     3   0.900000E-01   1.00800           0   0.00000     -0.301140E-02
     146 1S   28   PHE  HB2     3   0.900000E-01   1.00800           0   0.00000     -0.301140E-02
     147 1S   28   PHE  CG     21    0.00000       12.0110           0   0.00000     -0.301140E-02
     148 1S   28   PHE  CD1    21  -0.115000       12.0110           0   0.00000     -0.301140E-02
     149 1S   28   PHE  HD1     5   0.115000       1.00800           0   0.00000     -0.301140E-02
     150 1S   28   PHE  CE1    21  -0.115000       12.0110           0   0.00000     -0.301140E-02
     151 1S   28   PHE  HE1     5   0.115000       1.00800           0   0.00000     -0.301140E-02
     152 1S   28   PHE  CZ     21  -0.115000       12.0110           0   0.00000     -0.301140E-02
     153 1S   28   PHE  HZ      5   0.115000       1.00800           0   0.00000     -0.301140E-02
     154 1S   28   PHE  CD2    21  -0.115000       12.0110           0   0.00000     -0.301140E-02
     155 1S   28   PHE  HD2     5   0.115000       1.00800           0   0.00000     -0.301140E-02
     156 1S   28   PHE  CE2    21  -0.115000       12.0110           0   0.00000     -0.301140E-02
     157 1S   28   PHE  HE2     5   0.115000       1.00800           0   0.00000     -0.301140E-02
     158 1S   28   PHE  C      20   0.510000       12.0110           0   0.00000     -0.301140E-02
     159 1S   28   PHE  O      70  -0.510000       15.9990           0   0.00000     -0.301140E-02
     160 1S   29   LEU  N      54  -0.470000       14.0070           0   0.00000     -0.301140E-02
     161 1S   29   LEU  HN      1   0.310000       1.00800           0   0.00000     -0.301140E-02
     162 1S   29   LEU  CA     22   0.700000E-01   12.0110           0   0.00000     -0.301140E-02
     163 1S   29   LEU  HA      6   0.900000E-01   1.00800           0   0.00000     -0.301140E-02
     164 1S   29   LEU  CB     23  -0.180000       12.0110           0   0.00000     -0.301140E-02
     165 1S   29   LEU  HB1     3   0.900000E-01   1.00800           0   0.00000     -0.301140E-02
     166 1S   29   LEU  HB2     3   0.900000E-01   1.00800           0   0.00000     -0.301140E-02
     167 1S   29   LEU  CG     22  -0.900000E-01   12.0110           0   0.00000     -0.301140E-02
     168 1S   29   LEU  HG      3   0.900000E-01   1.00800           0   0.00000     -0.301140E-02
     169 1S   29   LEU  CD1    24  -0.270000       12.0110           0   0.00000     -0.301140E-02
     170 1S   29   LEU  HD11    3   0.900000E-01   1.00800           0   0.00000     -0.301140E-02
     171 1S   29   LEU  HD12    3   0.900000E-01   1.00800           0   0.00000     -0.301140E-02
     172 1S   29   LEU  HD13    3   0.900000E-01   1.00800           0   0.00000     -0.301140E-02
     173 1S   29   LEU  CD2    24  -0.270000       12.0110           0   0.00000     -0.301140E-02
     174 1S   29   LEU  HD21    3   0.900000E-01   1.00800           0   0.00000     -0.301140E-02
     175 1S   29   LEU  HD22    3   0.900000E-01   1.00800           0   0.00000     -0.301140E-02
     176 1S   29   LEU  HD23    3   0.900000E-01   1.00800           0   0.00000     -0.301140E-02
     177 1S   29   LEU  C      20   0.510000       12.0110           0   0.00000     -0.301140E-02
     178 1S   29   LEU  O      70  -0.510000       15.9990           0   0.00000     -0.301140E-02
     179 1S   30   ASP  N      54  -0.470000       14.0070           0   0.00000     -0.301140E-02
     180 1S   30   ASP  HN      1   0.310000       1.00800           0   0.00000     -0.301140E-02
     181 1S   30   ASP  CA     22   0.700000E-01   12.0110           0   0.00000     -0.301140E-02
     182 1S   30   ASP  HA      6   0.900000E-01   1.00800           0   0.00000     -0.301140E-02
     183 1S   30   ASP  CB     23  -0.280000       12.0110           0   0.00000     -0.301140E-02
     184 1S   30   ASP  HB1     3   0.900000E-01   1.00800           0   0.00000     -0.301140E-02
     185 1S   30   ASP  HB2     3   0.900000E-01   1.00800           0   0.00000     -0.301140E-02
     186 1S   30   ASP  CG     32   0.620000       12.0110           0   0.00000     -0.301140E-02
     187 1S   30   ASP  OD1    72  -0.760000       15.9990           0   0.00000     -0.301140E-02
     188 1S   30   ASP  OD2    72  -0.760000       15.9990           0   0.00000     -0.301140E-02
     189 1S   30   ASP  C      20   0.510000       12.0110           0   0.00000     -0.301140E-02
     190 1S   30   ASP  O      70  -0.510000       15.9990           0   0.00000     -0.301140E-02
     191 1S   31   LYS  N      54  -0.470000       14.0070           0   0.00000     -0.301140E-02
     192 1S   31   LYS  HN      1   0.310000       1.00800           0   0.00000     -0.301140E-02
     193 1S   31   LYS  CA     22   0.700000E-01   12.0110           0   0.00000     -0.301140E-02
     194 1S   31   LYS  HA      6   0.900000E-01   1.00800           0   0.00000     -0.301140E-02
     195 1S   31   LYS  CB     23  -0.180000       12.0110           0   0.00000     -0.301140E-02
     196 1S   31   LYS  HB1     3   0.900000E-01   1.00800           0   0.00000     -0.301140E-02
     197 1S   31   LYS  HB2     3   0.900000E-01   1.00800           0   0.00000     -0.301140E-02
     198 1S   31   LYS  CG     23  -0.180000       12.0110           0   0.00000     -0.301140E-02
     199 1S   31   LYS  HG1     3   0.900000E-01   1.00800           0   0.00000     -0.301140E-02
     200 1S   31   LYS  HG2     3   0.900000E-01   1.00800           0   0.00000     -0.301140E-02
     201 1S   31   LYS  CD     23  -0.180000       12.0110           0   0.00000     -0.301140E-02
     202 1S   31   LYS  HD1     3   0.900000E-01   1.00800           0   0.00000     -0.301140E-02
     203 1S   31   LYS  HD2     3   0.900000E-01   1.00800           0   0.00000     -0.301140E-02
     204 1S   31   LYS  CE     23   0.210000       12.0110           0   0.00000     -0.301140E-02
     205 1S   31   LYS  HE1     3   0.500000E-01   1.00800           0   0.00000     -0.301140E-02
     206 1S   31   LYS  HE2     3   0.500000E-01   1.00800           0   0.00000     -0.301140E-02
     207 1S   31   LYS  NZ     56  -0.300000       14.0070           0   0.00000     -0.301140E-02
     208 1S   31   LYS  HZ1     2   0.330000       1.00800           0   0.00000     -0.301140E-02
     209 1S   31   LYS  HZ2     2   0.330000       1.00800           0   0.00000     -0.301140E-02
     210 1S   31   LYS  HZ3     2   0.330000       1.00800           0   0.00000     -0.301140E-02
     211 1S   31   LYS  C      20   0.510000       12.0110           0   0.00000     -0.301140E-02
     212 1S   31   LYS  O      70  -0.510000       15.9990           0   0.00000     -0.301140E-02
     213 1S   32   PHE  N      54  -0.470000       14.0070           0   0.00000     -0.301140E-02
     214 1S   32   PHE  HN      1   0.310000       1.00800           0   0.00000     -0.301140E-02
     215 1S   32   PHE  CA     22   0.700000E-01   12.0110           0   0.00000     -0.301140E-02
     216 1S   32   PHE  HA      6   0.900000E-01   1.00800           0   0.00000     -0.301140E-02
     217 1S   32   PHE  CB     23  -0.180000       12.0110           0   0.00000     -0.301140E-02
     218 1S   32   PHE  HB1     3   0.900000E-01   1.00800           0   0.00000     -0.301140E-02
     219 1S   32   PHE  HB2     3   0.900000E-01   1.00800           0   0.00000     -0.301140E-02
     220 1S   32   PHE  CG     21    0.00000       12.0110           0   0.00000     -0.301140E-02
     221 1S   32   PHE  CD1    21  -0.115000       12.0110           0   0.00000     -0.301140E-02
     222 1S   32   PHE  HD1     5   0.115000       1.00800           0   0.00000     -0.301140E-02
     223 1S   32   PHE  CE1    21  -0.115000       12.0110           0   0.00000     -0.301140E-02
     224 1S   32   PHE  HE1     5   0.115000       1.00800           0   0.00000     -0.301140E-02
     225 1S   32   PHE  CZ     21  -0.115000       12.0110           0   0.00000     -0.301140E-02
     226 1S   32   PHE  HZ      5   0.115000       1.00800           0   0.00000     -0.301140E-02
     227 1S   32   PHE  CD2    21  -0.115000       12.0110           0   0.00000     -0.301140E-02
     228 1S   32   PHE  HD2     5   0.115000       1.00800           0   0.00000     -0.301140E-02
     229 1S   32   PHE  CE2    21  -0.115000       12.0110           0   0.00000     -0.301140E-02
     230 1S   32   PHE  HE2     5   0.115000       1.00800           0   0.00000     -0.301140E-02
     231 1S   32   PHE  C      20   0.510000       12.0110           0   0.00000     -0.301140E-02
     232 1S   32   PHE  O      70  -0.510000       15.9990           0   0.00000     -0.301140E-02
     233 1S   33   ASN  N      54  -0.470000       14.0070           0   0.00000     -0.301140E-02
     234 1S   33   ASN  HN      1   0.310000       1.00800           0   0.00000     -0.301140E-02
     235 1S   33   ASN  CA     22   0.700000E-01   12.0110           0   0.00000     -0.301140E-02
     236 1S   33   ASN  HA      6   0.900000E-01   1.00800           0   0.00000     -0.301140E-02
     237 1S   33   ASN  CB     23  -0.180000       12.0110           0   0.00000     -0.301140E-02
     238 1S   33   ASN  HB1     3   0.900000E-01   1.00800           0   0.00000     -0.301140E-02
     239 1S   33   ASN  HB2     3   0.900000E-01   1.00800           0   0.00000     -0.301140E-02
     240 1S   33   ASN  CG     32   0.550000       12.0110           0   0.00000     -0.301140E-02
     241 1S   33   ASN  OD1    70  -0.550000       15.9990           0   0.00000     -0.301140E-02
     242 1S   33   ASN  ND2    55  -0.620000       14.0070           0   0.00000     -0.301140E-02
     243 1S   33   ASN  HD21    1   0.320000       1.00800           0   0.00000     -0.301140E-02
     244 1S   33   ASN  HD22    1   0.300000       1.00800           0   0.00000     -0.301140E-02
     245 1S   33   ASN  C      20   0.510000       12.0110           0   0.00000     -0.301140E-02
     246 1S   33   ASN  O      70  -0.510000       15.9990           0   0.00000     -0.301140E-02
     247 1S   34   HSE  N      54  -0.470000       14.0070           0   0.00000     -0.301140E-02
     248 1S   34   HSE  HN      1   0.310000       1.00800           0   0.00000     -0.301140E-02
     249 1S   34   HSE  CA     22   0.700000E-01   12.0110           0   0.00000     -0.301140E-02
     250 1S   34   HSE  HA      6   0.900000E-01   1.00800           0   0.00000     -0.301140E-02
     251 1S   34   HSE  CB     23  -0.800000E-01   12.0110           0   0.00000     -0.301140E-02
     252 1S   34   HSE  HB1     3   0.900000E-01   1.00800           0   0.00000     -0.301140E-02
     253 1S   34   HSE  HB2     3   0.900000E-01   1.00800           0   0.00000     -0.301140E-02
     254 1S   34   HSE  ND1    52  -0.700000       14.0070           0   0.00000     -0.301140E-02
     255 1S   34   HSE  CG     25   0.220000       12.0110           0   0.00000     -0.301140E-02
     256 1S   34   HSE  CE1    26   0.250000       12.0110           0   0.00000     -0.301140E-02
     257 1S   34   HSE  HE1     7   0.130000       1.00800           0   0.00000     -0.301140E-02
     258 1S   34   HSE  NE2    51  -0.360000       14.0070           0   0.00000     -0.301140E-02
     259 1S   34   HSE  HE2     1   0.320000       1.00800           0   0.00000     -0.301140E-02
     260 1S   34   HSE  CD2    25  -0.500000E-01   12.0110           0   0.00000     -0.301140E-02
     261 1S   34   HSE  HD2     9   0.900000E-01   1.00800           0   0.00000     -0.301140E-02
     262 1S   34   HSE  C      20   0.510000       12.0110           0   0.00000     -0.301140E-02
     263 1S   34   HSE  O      70  -0.510000       15.9990           0   0.00000     -0.301140E-02
     264 1S   35   GLU  N      54  -0.470000       14.0070           0   0.00000     -0.301140E-02
     265 1S   35   GLU  HN      1   0.310000       1.00800           0   0.00000     -0.301140E-02
     266 1S   35   GLU  CA     22   0.700000E-01   12.0110           0   0.00000     -0.301140E-02
     267 1S   35   GLU  HA      6   0.900000E-01   1.00800           0   0.00000     -0.301140E-02
     268 1S   35   GLU  CB     23  -0.180000       12.0110           0   0.00000     -0.301140E-02
     269 1S   35   GLU  HB1     3   0.900000E-01   1.00800           0   0.00000     -0.301140E-02
     270 1S   35   GLU  HB2     3   0.900000E-01   1.00800           0   0.00000     -0.301140E-02
     271 1S   35   GLU  CG     23  -0.280000       12.0110           0   0.00000     -0.301140E-02
     272 1S   35   GLU  HG1     3   0.900000E-01   1.00800           0   0.00000     -0.301140E-02
     273 1S   35   GLU  HG2     3   0.900000E-01   1.00800           0   0.00000     -0.301140E-02
     274 1S   35   GLU  CD     32   0.620000       12.0110           0   0.00000     -0.301140E-02
     275 1S   35   GLU  OE1    72  -0.760000       15.9990           0   0.00000     -0.301140E-02
     276 1S   35   GLU  OE2    72  -0.760000       15.9990           0   0.00000     -0.301140E-02
     277 1S   35   GLU  C      20   0.510000       12.0110           0   0.00000     -0.301140E-02
     278 1S   35   GLU  O      70  -0.510000       15.9990           0   0.00000     -0.301140E-02
     279 1S   36   ALA  N      54  -0.470000       14.0070           0   0.00000     -0.301140E-02
     280 1S   36   ALA  HN      1   0.310000       1.00800           0   0.00000     -0.301140E-02
     281 1S   36   ALA  CA     22   0.700000E-01   12.0110           0   0.00000     -0.301140E-02
     282 1S   36   ALA  HA      6   0.900000E-01   1.00800           0   0.00000     -0.301140E-02
     283 1S   36   ALA  CB     24  -0.270000       12.0110           0   0.00000     -0.301140E-02
     284 1S   36   ALA  HB1     3   0.900000E-01   1.00800           0   0.00000     -0.301140E-02
     285 1S   36   ALA  HB2     3   0.900000E-01   1.00800           0   0.00000     -0.301140E-02
     286 1S   36   ALA  HB3     3   0.900000E-01   1.00800           0   0.00000     -0.301140E-02
     287 1S   36   ALA  C      20   0.510000       12.0110           0   0.00000     -0.301140E-02
     288 1S   36   ALA  O      70  -0.510000       15.9990           0   0.00000     -0.301140E-02
     289 1S   37   GLU  N      54  -0.470000       14.0070           0   0.00000     -0.301140E-02
     290 1S   37   GLU  HN      1   0.310000       1.00800           0   0.00000     -0.301140E-02
     291 1S   37   GLU  CA     22   0.700000E-01   12.0110           0   0.00000     -0.301140E-02
     292 1S   37   GLU  HA      6   0.900000E-01   1.00800           0   0.00000     -0.301140E-02
     293 1S   37   GLU  CB     23  -0.180000       12.0110           0   0.00000     -0.301140E-02
     294 1S   37   GLU  HB1     3   0.900000E-01   1.00800           0   0.00000     -0.301140E-02
     295 1S   37   GLU  HB2     3   0.900000E-01   1.00800           0   0.00000     -0.301140E-02
     296 1S   37   GLU  CG     23  -0.280000       12.0110           0   0.00000     -0.301140E-02
     297 1S   37   GLU  HG1     3   0.900000E-01   1.00800           0   0.00000     -0.301140E-02
     298 1S   37   GLU  HG2     3   0.900000E-01   1.00800           0   0.00000     -0.301140E-02
     299 1S   37   GLU  CD     32   0.620000       12.0110           0   0.00000     -0.301140E-02
     300 1S   37   GLU  OE1    72  -0.760000       15.9990           0   0.00000     -0.301140E-02
     301 1S   37   GLU  OE2    72  -0.760000       15.9990           0   0.00000     -0.301140E-02
     302 1S   37   GLU  C      20   0.510000       12.0110           0   0.00000     -0.301140E-02
     303 1S   37   GLU  O      70  -0.510000       15.9990           0   0.00000     -0.301140E-02
     304 1S   38   ASP  N      54  -0.470000       14.0070           0   0.00000     -0.301140E-02
     305 1S   38   ASP  HN      1   0.310000       1.00800           0   0.00000     -0.301140E-02
     306 1S   38   ASP  CA     22   0.700000E-01   12.0110           0   0.00000     -0.301140E-02
     307 1S   38   ASP  HA      6   0.900000E-01   1.00800           0   0.00000     -0.301140E-02
     308 1S   38   ASP  CB     23  -0.280000       12.0110           0   0.00000     -0.301140E-02
     309 1S   38   ASP  HB1     3   0.900000E-01   1.00800           0   0.00000     -0.301140E-02
     310 1S   38   ASP  HB2     3   0.900000E-01   1.00800           0   0.00000     -0.301140E-02
     311 1S   38   ASP  CG     32   0.620000       12.0110           0   0.00000     -0.301140E-02
     312 1S   38   ASP  OD1    72  -0.760000       15.9990           0   0.00000     -0.301140E-02
     313 1S   38   ASP  OD2    72  -0.760000       15.9990           0   0.00000     -0.301140E-02
     314 1S   38   ASP  C      20   0.510000       12.0110           0   0.00000     -0.301140E-02
     315 1S   38   ASP  O      70  -0.510000       15.9990           0   0.00000     -0.301140E-02
     316 1S   39   LEU  N      54  -0.470000       14.0070           0   0.00000     -0.301140E-02
     317 1S   39   LEU  HN      1   0.310000       1.00800           0   0.00000     -0.301140E-02
     318 1S   39   LEU  CA     22   0.700000E-01   12.0110           0   0.00000     -0.301140E-02
     319 1S   39   LEU  HA      6   0.900000E-01   1.00800           0   0.00000     -0.301140E-02
     320 1S   39   LEU  CB     23  -0.180000       12.0110           0   0.00000     -0.301140E-02
     321 1S   39   LEU  HB1     3   0.900000E-01   1.00800           0   0.00000     -0.301140E-02
     322 1S   39   LEU  HB2     3   0.900000E-01   1.00800           0   0.00000     -0.301140E-02
     323 1S   39   LEU  CG     22  -0.900000E-01   12.0110           0   0.00000     -0.301140E-02
     324 1S   39   LEU  HG      3   0.900000E-01   1.00800           0   0.00000     -0.301140E-02
     325 1S   39   LEU  CD1    24  -0.270000       12.0110           0   0.00000     -0.301140E-02
     326 1S   39   LEU  HD11    3   0.900000E-01   1.00800           0   0.00000     -0.301140E-02
     327 1S   39   LEU  HD12    3   0.900000E-01   1.00800           0   0.00000     -0.301140E-02
     328 1S   39   LEU  HD13    3   0.900000E-01   1.00800           0   0.00000     -0.301140E-02
     329 1S   39   LEU  CD2    24  -0.270000       12.0110           0   0.00000     -0.301140E-02
     330 1S   39   LEU  HD21    3   0.900000E-01   1.00800           0   0.00000     -0.301140E-02
     331 1S   39   LEU  HD22    3   0.900000E-01   1.00800           0   0.00000     -0.301140E-02
     332 1S   39   LEU  HD23    3   0.900000E-01   1.00800           0   0.00000     -0.301140E-02
     333 1S   39   LEU  C      20   0.510000       12.0110           0   0.00000     -0.301140E-02
     334 1S   39   LEU  O      70  -0.510000       15.9990           0   0.00000     -0.301140E-02
     335 1S   40   PHE  N      54  -0.470000       14.0070           0   0.00000     -0.301140E-02
     336 1S   40   PHE  HN      1   0.310000       1.00800           0   0.00000     -0.301140E-02
     337 1S   40   PHE  CA     22   0.700000E-01   12.0110           0   0.00000     -0.301140E-02
     338 1S   40   PHE  HA      6   0.900000E-01   1.00800           0   0.00000     -0.301140E-02
     339 1S   40   PHE  CB     23  -0.180000       12.0110           0   0.00000     -0.301140E-02
     340 1S   40   PHE  HB1     3   0.900000E-01   1.00800           0   0.00000     -0.301140E-02
     341 1S   40   PHE  HB2     3   0.900000E-01   1.00800           0   0.00000     -0.301140E-02
     342 1S   40   PHE  CG     21    0.00000       12.0110           0   0.00000     -0.301140E-02
     343 1S   40   PHE  CD1    21  -0.115000       12.0110           0   0.00000     -0.301140E-02
     344 1S   40   PHE  HD1     5   0.115000       1.00800           0   0.00000     -0.301140E-02
     345 1S   40   PHE  CE1    21  -0.115000       12.0110           0   0.00000     -0.301140E-02
     346 1S   40   PHE  HE1     5   0.115000       1.00800           0   0.00000     -0.301140E-02
     347 1S   40   PHE  CZ     21  -0.115000       12.0110           0   0.00000     -0.301140E-02
     348 1S   40   PHE  HZ      5   0.115000       1.00800           0   0.00000     -0.301140E-02
     349 1S   40   PHE  CD2    21  -0.115000       12.0110           0   0.00000     -0.301140E-02
     350 1S   40   PHE  HD2     5   0.115000       1.00800           0   0.00000     -0.301140E-02
     351 1S   40   PHE  CE2    21  -0.115000       12.0110           0   0.00000     -0.301140E-02
     352 1S   40   PHE  HE2     5   0.115000       1.00800           0   0.00000     -0.301140E-02
     353 1S   40   PHE  C      20   0.510000       12.0110           0   0.00000     -0.301140E-02
     354 1S   40   PHE  O      70  -0.510000       15.9990           0   0.00000     -0.301140E-02
     355 1S   41   TYR  N      54  -0.470000       14.0070           0   0.00000     -0.301140E-02
     356 1S   41   TYR  HN      1   0.310000       1.00800           0   0.00000     -0.301140E-02
     357 1S   41   TYR  CA     22   0.700000E-01   12.0110           0   0.00000     -0.301140E-02
     358 1S   41   TYR  HA      6   0.900000E-01   1.00800           0   0.00000     -0.301140E-02
     359 1S   41   TYR  CB     23  -0.180000       12.0110           0   0.00000     -0.301140E-02
     360 1S   41   TYR  HB1     3   0.900000E-01   1.00800           0   0.00000     -0.301140E-02
     361 1S   41   TYR  HB2     3   0.900000E-01   1.00800           0   0.00000     -0.301140E-02
     362 1S   41   TYR  CG     21    0.00000       12.0110           0   0.00000     -0.301140E-02
     363 1S   41   TYR  CD1    21  -0.115000       12.0110           0   0.00000     -0.301140E-02
     364 1S   41   TYR  HD1     5   0.115000       1.00800           0   0.00000     -0.301140E-02
     365 1S   41   TYR  CE1    21  -0.115000       12.0110           0   0.00000     -0.301140E-02
     366 1S   41   TYR  HE1     5   0.115000       1.00800           0   0.00000     -0.301140E-02
     367 1S   41   TYR  CZ     21   0.110000       12.0110           0   0.00000     -0.301140E-02
     368 1S   41   TYR  OH     73  -0.540000       15.9990           0   0.00000     -0.301140E-02
     369 1S   41   TYR  HH      1   0.430000       1.00800           0   0.00000     -0.301140E-02
     370 1S   41   TYR  CD2    21  -0.115000       12.0110           0   0.00000     -0.301140E-02
     371 1S   41   TYR  HD2     5   0.115000       1.00800           0   0.00000     -0.301140E-02
     372 1S   41   TYR  CE2    21  -0.115000       12.0110           0   0.00000     -0.301140E-02
     373 1S   41   TYR  HE2     5   0.115000       1.00800           0   0.00000     -0.301140E-02
     374 1S   41   TYR  C      20   0.510000       12.0110           0   0.00000     -0.301140E-02
     375 1S   41   TYR  O      70  -0.510000       15.9990           0   0.00000     -0.301140E-02
     376 1S   42   GLN  N      54  -0.470000       14.0070           0   0.00000     -0.301140E-02
     377 1S   42   GLN  HN      1   0.310000       1.00800           0   0.00000     -0.301140E-02
     378 1S   42   GLN  CA     22   0.700000E-01   12.0110           0   0.00000     -0.301140E-02
     379 1S   42   GLN  HA      6   0.900000E-01   1.00800           0   0.00000     -0.301140E-02
     380 1S   42   GLN  CB     23  -0.180000       12.0110           0   0.00000     -0.301140E-02
     381 1S   42   GLN  HB1     3   0.900000E-01   1.00800           0   0.00000     -0.301140E-02
     382 1S   42   GLN  HB2     3   0.900000E-01   1.00800           0   0.00000     -0.301140E-02
     383 1S   42   GLN  CG     23  -0.180000       12.0110           0   0.00000     -0.301140E-02
     384 1S   42   GLN  HG1     3   0.900000E-01   1.00800           0   0.00000     -0.301140E-02
     385 1S   42   GLN  HG2     3   0.900000E-01   1.00800           0   0.00000     -0.301140E-02
     386 1S   42   GLN  CD     32   0.550000       12.0110           0   0.00000     -0.301140E-02
     387 1S   42   GLN  OE1    70  -0.550000       15.9990           0   0.00000     -0.301140E-02
     388 1S   42   GLN  NE2    55  -0.620000       14.0070           0   0.00000     -0.301140E-02
     389 1S   42   GLN  HE21    1   0.320000       1.00800           0   0.00000     -0.301140E-02
     390 1S   42   GLN  HE22    1   0.300000       1.00800           0   0.00000     -0.301140E-02
     391 1S   42   GLN  C      20   0.510000       12.0110           0   0.00000     -0.301140E-02
     392 1S   42   GLN  O      70  -0.510000       15.9990           0   0.00000     -0.301140E-02
     393 1S   43   SER  N      54  -0.470000       14.0070           0   0.00000     -0.301140E-02
     394 1S   43   SER  HN      1   0.310000       1.00800           0   0.00000     -0.301140E-02
     395 1S   43   SER  CA     22   0.700000E-01   12.0110           0   0.00000     -0.301140E-02
     396 1S   43   SER  HA      6   0.900000E-01   1.00800           0   0.00000     -0.301140E-02
     397 1S   43   SER  CB     23   0.500000E-01   12.0110           0   0.00000     -0.301140E-02
     398 1S   43   SER  HB1     3   0.900000E-01   1.00800           0   0.00000     -0.301140E-02
     399 1S   43   SER  HB2     3   0.900000E-01   1.00800           0   0.00000     -0.301140E-02
     400 1S   43   SER  OG     73  -0.660000       15.9990           0   0.00000     -0.301140E-02
     401 1S   43   SER  HG1     1   0.430000       1.00800           0   0.00000     -0.301140E-02
     402 1S   43   SER  C      20   0.510000       12.0110           0   0.00000     -0.301140E-02
     403 1S   43   SER  O      70  -0.510000       15.9990           0   0.00000     -0.301140E-02
     404 1S   44   SER  N      54  -0.470000       14.0070           0   0.00000     -0.301140E-02
     405 1S   44   SER  HN      1   0.310000       1.00800           0   0.00000     -0.301140E-02
     406 1S   44   SER  CA     22   0.700000E-01   12.0110           0   0.00000     -0.301140E-02
     407 1S   44   SER  HA      6   0.900000E-01   1.00800           0   0.00000     -0.301140E-02
     408 1S   44   SER  CB     23   0.500000E-01   12.0110           0   0.00000     -0.301140E-02
     409 1S   44   SER  HB1     3   0.900000E-01   1.00800           0   0.00000     -0.301140E-02
     410 1S   44   SER  HB2     3   0.900000E-01   1.00800           0   0.00000     -0.301140E-02
     411 1S   44   SER  OG     73  -0.660000       15.9990           0   0.00000     -0.301140E-02
     412 1S   44   SER  HG1     1   0.430000       1.00800           0   0.00000     -0.301140E-02
     413 1S   44   SER  C      20   0.510000       12.0110           0   0.00000     -0.301140E-02
     414 1S   44   SER  O      70  -0.510000       15.9990           0   0.00000     -0.301140E-02
     415 1S   45   LEU  N      54  -0.470000       14.0070           0   0.00000     -0.301140E-02
     416 1S   45   LEU  HN      1   0.310000       1.00800           0   0.00000     -0.301140E-02
     417 1S   45   LEU  CA     22   0.700000E-01   12.0110           0   0.00000     -0.301140E-02
     418 1S   45   LEU  HA      6   0.900000E-01   1.00800           0   0.00000     -0.301140E-02
     419 1S   45   LEU  CB     23  -0.180000       12.0110           0   0.00000     -0.301140E-02
     420 1S   45   LEU  HB1     3   0.900000E-01   1.00800           0   0.00000     -0.301140E-02
     421 1S   45   LEU  HB2     3   0.900000E-01   1.00800           0   0.00000     -0.301140E-02
     422 1S   45   LEU  CG     22  -0.900000E-01   12.0110           0   0.00000     -0.301140E-02
     423 1S   45   LEU  HG      3   0.900000E-01   1.00800           0   0.00000     -0.301140E-02
     424 1S   45   LEU  CD1    24  -0.270000       12.0110           0   0.00000     -0.301140E-02
     425 1S   45   LEU  HD11    3   0.900000E-01   1.00800           0   0.00000     -0.301140E-02
     426 1S   45   LEU  HD12    3   0.900000E-01   1.00800           0   0.00000     -0.301140E-02
     427 1S   45   LEU  HD13    3   0.900000E-01   1.00800           0   0.00000     -0.301140E-02
     428 1S   45   LEU  CD2    24  -0.270000       12.0110           0   0.00000     -0.301140E-02
     429 1S   45   LEU  HD21    3   0.900000E-01   1.00800           0   0.00000     -0.301140E-02
     430 1S   45   LEU  HD22    3   0.900000E-01   1.00800           0   0.00000     -0.301140E-02
     431 1S   45   LEU  HD23    3   0.900000E-01   1.00800           0   0.00000     -0.301140E-02
     432 1S   45   LEU  C      20   0.510000       12.0110           0   0.00000     -0.301140E-02
     433 1S   45   LEU  O      70  -0.510000       15.9990           0   0.00000     -0.301140E-02
     434 1S   46   ALA  N      54  -0.470000       14.0070           0   0.00000     -0.301140E-02
     435 1S   46   ALA  HN      1   0.310000       1.00800           0   0.00000     -0.301140E-02
     436 1S   46   ALA  CA     22   0.700000E-01   12.0110           0   0.00000     -0.301140E-02
     437 1S   46   ALA  HA      6   0.900000E-01   1.00800           0   0.00000     -0.301140E-02
     438 1S   46   ALA  CB     24  -0.270000       12.0110           0   0.00000     -0.301140E-02
     439 1S   46   ALA  HB1     3   0.900000E-01   1.00800           0   0.00000     -0.301140E-02
     440 1S   46   ALA  HB2     3   0.900000E-01   1.00800           0   0.00000     -0.301140E-02
     441 1S   46   ALA  HB3     3   0.900000E-01   1.00800           0   0.00000     -0.301140E-02
     442 1S   46   ALA  C      20   0.510000       12.0110           0   0.00000     -0.301140E-02
     443 1S   46   ALA  O      70  -0.510000       15.9990           0   0.00000     -0.301140E-02
     444 1S   47   SER  N      54  -0.470000       14.0070           0   0.00000     -0.301140E-02
     445 1S   47   SER  HN      1   0.310000       1.00800           0   0.00000     -0.301140E-02
     446 1S   47   SER  CA     22   0.700000E-01   12.0110           0   0.00000     -0.301140E-02
     447 1S   47   SER  HA      6   0.900000E-01   1.00800           0   0.00000     -0.301140E-02
     448 1S   47   SER  CB     23   0.500000E-01   12.0110           0   0.00000     -0.301140E-02
     449 1S   47   SER  HB1     3   0.900000E-01   1.00800           0   0.00000     -0.301140E-02
     450 1S   47   SER  HB2     3   0.900000E-01   1.00800           0   0.00000     -0.301140E-02
     451 1S   47   SER  OG     73  -0.660000       15.9990           0   0.00000     -0.301140E-02
     452 1S   47   SER  HG1     1   0.430000       1.00800           0   0.00000     -0.301140E-02
     453 1S   47   SER  C      20   0.510000       12.0110           0   0.00000     -0.301140E-02
     454 1S   47   SER  O      70  -0.510000       15.9990           0   0.00000     -0.301140E-02
     455 1S   48   TRP  N      54  -0.470000       14.0070           0   0.00000     -0.301140E-02
     456 1S   48   TRP  HN      1   0.310000       1.00800           0   0.00000     -0.301140E-02
     457 1S   48   TRP  CA     22   0.700000E-01   12.0110           0   0.00000     -0.301140E-02
     458 1S   48   TRP  HA      6   0.900000E-01   1.00800           0   0.00000     -0.301140E-02
     459 1S   48   TRP  CB     23  -0.180000       12.0110           0   0.00000     -0.301140E-02
     460 1S   48   TRP  HB1     3   0.900000E-01   1.00800           0   0.00000     -0.301140E-02
     461 1S   48   TRP  HB2     3   0.900000E-01   1.00800           0   0.00000     -0.301140E-02
     462 1S   48   TRP  CG     28  -0.300000E-01   12.0110           0   0.00000     -0.301140E-02
     463 1S   48   TRP  CD1    21   0.350000E-01   12.0110           0   0.00000     -0.301140E-02
     464 1S   48   TRP  HD1     5   0.115000       1.00800           0   0.00000     -0.301140E-02
     465 1S   48   TRP  NE1    58  -0.610000       14.0070           0   0.00000     -0.301140E-02
     466 1S   48   TRP  HE1     1   0.380000       1.00800           0   0.00000     -0.301140E-02
     467 1S   48   TRP  CE2    27   0.130000       12.0110           0   0.00000     -0.301140E-02
     468 1S   48   TRP  CD2    27  -0.200000E-01   12.0110           0   0.00000     -0.301140E-02
     469 1S   48   TRP  CE3    21  -0.115000       12.0110           0   0.00000     -0.301140E-02
     470 1S   48   TRP  HE3     5   0.115000       1.00800           0   0.00000     -0.301140E-02
     471 1S   48   TRP  CZ3    21  -0.115000       12.0110           0   0.00000     -0.301140E-02
     472 1S   48   TRP  HZ3     5   0.115000       1.00800           0   0.00000     -0.301140E-02
     473 1S   48   TRP  CZ2    21  -0.115000       12.0110           0   0.00000     -0.301140E-02
     474 1S   48   TRP  HZ2     5   0.115000       1.00800           0   0.00000     -0.301140E-02
     475 1S   48   TRP  CH2    21  -0.115000       12.0110           0   0.00000     -0.301140E-02
     476 1S   48   TRP  HH2     5   0.115000       1.00800           0   0.00000     -0.301140E-02
     477 1S   48   TRP  C      20   0.510000       12.0110           0   0.00000     -0.301140E-02
     478 1S   48   TRP  O      70  -0.510000       15.9990           0   0.00000     -0.301140E-02
     479 1S   49   ASN  N      54  -0.470000       14.0070           0   0.00000     -0.301140E-02
     480 1S   49   ASN  HN      1   0.310000       1.00800           0   0.00000     -0.301140E-02
     481 1S   49   ASN  CA     22   0.700000E-01   12.0110           0   0.00000     -0.301140E-02
     482 1S   49   ASN  HA      6   0.900000E-01   1.00800           0   0.00000     -0.301140E-02
     483 1S   49   ASN  CB     23  -0.180000       12.0110           0   0.00000     -0.301140E-02
     484 1S   49   ASN  HB1     3   0.900000E-01   1.00800           0   0.00000     -0.301140E-02
     485 1S   49   ASN  HB2     3   0.900000E-01   1.00800           0   0.00000     -0.301140E-02
     486 1S   49   ASN  CG     32   0.550000       12.0110           0   0.00000     -0.301140E-02
     487 1S   49   ASN  OD1    70  -0.550000       15.9990           0   0.00000     -0.301140E-02
     488 1S   49   ASN  ND2    55  -0.620000       14.0070           0   0.00000     -0.301140E-02
     489 1S   49   ASN  HD21    1   0.320000       1.00800           0   0.00000     -0.301140E-02
     490 1S   49   ASN  HD22    1   0.300000       1.00800           0   0.00000     -0.301140E-02
     491 1S   49   ASN  C      20   0.510000       12.0110           0   0.00000     -0.301140E-02
     492 1S   49   ASN  O      70  -0.510000       15.9990           0   0.00000     -0.301140E-02
     493 1S   50   TYR  N      54  -0.470000       14.0070           0   0.00000     -0.301140E-02
     494 1S   50   TYR  HN      1   0.310000       1.00800           0   0.00000     -0.301140E-02
     495 1S   50   TYR  CA     22   0.700000E-01   12.0110           0   0.00000     -0.301140E-02
     496 1S   50   TYR  HA      6   0.900000E-01   1.00800           0   0.00000     -0.301140E-02
     497 1S   50   TYR  CB     23  -0.180000       12.0110           0   0.00000     -0.301140E-02
     498 1S   50   TYR  HB1     3   0.900000E-01   1.00800           0   0.00000     -0.301140E-02
     499 1S   50   TYR  HB2     3   0.900000E-01   1.00800           0   0.00000     -0.301140E-02
     500 1S   50   TYR  CG     21    0.00000       12.0110           0   0.00000     -0.301140E-02
     501 1S   50   TYR  CD1    21  -0.115000       12.0110           0   0.00000     -0.301140E-02
     502 1S   50   TYR  HD1     5   0.115000       1.00800           0   0.00000     -0.301140E-02
     503 1S   50   TYR  CE1    21  -0.115000       12.0110           0   0.00000     -0.301140E-02
     504 1S   50   TYR  HE1     5   0.115000       1.00800           0   0.00000     -0.301140E-02
     505 1S   50   TYR  CZ     21   0.110000       12.0110           0   0.00000     -0.301140E-02
     506 1S   50   TYR  OH     73  -0.540000       15.9990           0   0.00000     -0.301140E-02
     507 1S   50   TYR  HH      1   0.430000       1.00800           0   0.00000     -0.301140E-02
     508 1S   50   TYR  CD2    21  -0.115000       12.0110           0   0.00000     -0.301140E-02
     509 1S   50   TYR  HD2     5   0.115000       1.00800           0   0.00000     -0.301140E-02
     510 1S   50   TYR  CE2    21  -0.115000       12.0110           0   0.00000     -0.301140E-02
     511 1S   50   TYR  HE2     5   0.115000       1.00800           0   0.00000     -0.301140E-02
     512 1S   50   TYR  C      20   0.510000       12.0110           0   0.00000     -0.301140E-02
     513 1S   50   TYR  O      70  -0.510000       15.9990           0   0.00000     -0.301140E-02
     514 1S   51   ASN  N      54  -0.470000       14.0070           0   0.00000     -0.301140E-02
     515 1S   51   ASN  HN      1   0.310000       1.00800           0   0.00000     -0.301140E-02
     516 1S   51   ASN  CA     22   0.700000E-01   12.0110           0   0.00000     -0.301140E-02
     517 1S   51   ASN  HA      6   0.900000E-01   1.00800           0   0.00000     -0.301140E-02
     518 1S   51   ASN  CB     23  -0.180000       12.0110           0   0.00000     -0.301140E-02
     519 1S   51   ASN  HB1     3   0.900000E-01   1.00800           0   0.00000     -0.301140E-02
     520 1S   51   ASN  HB2     3   0.900000E-01   1.00800           0   0.00000     -0.301140E-02
     521 1S   51   ASN  CG     32   0.550000       12.0110           0   0.00000     -0.301140E-02
     522 1S   51   ASN  OD1    70  -0.550000       15.9990           0   0.00000     -0.301140E-02
     523 1S   51   ASN  ND2    55  -0.620000       14.0070           0   0.00000     -0.301140E-02
     524 1S   51   ASN  HD21    1   0.320000       1.00800           0   0.00000     -0.301140E-02
     525 1S   51   ASN  HD22    1   0.300000       1.00800           0   0.00000     -0.301140E-02
     526 1S   51   ASN  C      20   0.510000       12.0110           0   0.00000     -0.301140E-02
     527 1S   51   ASN  O      70  -0.510000       15.9990           0   0.00000     -0.301140E-02
     528 1S   52   THR  N      54  -0.470000       14.0070           0   0.00000     -0.301140E-02
     529 1S   52   THR  HN      1   0.310000       1.00800           0   0.00000     -0.301140E-02
     530 1S   52   THR  CA     22   0.700000E-01   12.0110           0   0.00000     -0.301140E-02
     531 1S   52   THR  HA      6   0.900000E-01   1.00800           0   0.00000     -0.301140E-02
     532 1S   52   THR  CB     22   0.140000       12.0110           0   0.00000     -0.301140E-02
     533 1S   52   THR  HB      3   0.900000E-01   1.00800           0   0.00000     -0.301140E-02
     534 1S   52   THR  OG1    73  -0.660000       15.9990           0   0.00000     -0.301140E-02
     535 1S   52   THR  HG1     1   0.430000       1.00800           0   0.00000     -0.301140E-02
     536 1S   52   THR  CG2    24  -0.270000       12.0110           0   0.00000     -0.301140E-02
     537 1S   52   THR  HG21    3   0.900000E-01   1.00800           0   0.00000     -0.301140E-02
     538 1S   52   THR  HG22    3   0.900000E-01   1.00800           0   0.00000     -0.301140E-02
     539 1S   52   THR  HG23    3   0.900000E-01   1.00800           0   0.00000     -0.301140E-02
     540 1S   52   THR  C      20   0.510000       12.0110           0   0.00000     -0.301140E-02
     541 1S   52   THR  O      70  -0.510000       15.9990           0   0.00000     -0.301140E-02
     542 1S   53   ASN  N      54  -0.470000       14.0070           0   0.00000     -0.301140E-02
     543 1S   53   ASN  HN      1   0.310000       1.00800           0   0.00000     -0.301140E-02
     544 1S   53   ASN  CA     22   0.700000E-01   12.0110           0   0.00000     -0.301140E-02
     545 1S   53   ASN  HA      6   0.900000E-01   1.00800           0   0.00000     -0.301140E-02
     546 1S   53   ASN  CB     23  -0.180000       12.0110           0   0.00000     -0.301140E-02
     547 1S   53   ASN  HB1     3   0.900000E-01   1.00800           0   0.00000     -0.301140E-02
     548 1S   53   ASN  HB2     3   0.900000E-01   1.00800           0   0.00000     -0.301140E-02
     549 1S   53   ASN  CG     32   0.550000       12.0110           0   0.00000     -0.301140E-02
     550 1S   53   ASN  OD1    70  -0.550000       15.9990           0   0.00000     -0.301140E-02
     551 1S   53   ASN  ND2    55  -0.620000       14.0070           0   0.00000     -0.301140E-02
     552 1S   53   ASN  HD21    1   0.320000       1.00800           0   0.00000     -0.301140E-02
     553 1S   53   ASN  HD22    1   0.300000       1.00800           0   0.00000     -0.301140E-02
     554 1S   53   ASN  C      20   0.510000       12.0110           0   0.00000     -0.301140E-02
     555 1S   53   ASN  O      70  -0.510000       15.9990           0   0.00000     -0.301140E-02
     556 1S   54   ILE  N      54  -0.470000       14.0070           0   0.00000     -0.301140E-02
     557 1S   54   ILE  HN      1   0.310000       1.00800           0   0.00000     -0.301140E-02
     558 1S   54   ILE  CA     22   0.700000E-01   12.0110           0   0.00000     -0.301140E-02
     559 1S   54   ILE  HA      6   0.900000E-01   1.00800           0   0.00000     -0.301140E-02
     560 1S   54   ILE  CB     22  -0.900000E-01   12.0110           0   0.00000     -0.301140E-02
     561 1S   54   ILE  HB      3   0.900000E-01   1.00800           0   0.00000     -0.301140E-02
     562 1S   54   ILE  CG2    24  -0.270000       12.0110           0   0.00000     -0.301140E-02
     563 1S   54   ILE  HG21    3   0.900000E-01   1.00800           0   0.00000     -0.301140E-02
     564 1S   54   ILE  HG22    3   0.900000E-01   1.00800           0   0.00000     -0.301140E-02
     565 1S   54   ILE  HG23    3   0.900000E-01   1.00800           0   0.00000     -0.301140E-02
     566 1S   54   ILE  CG1    23  -0.180000       12.0110           0   0.00000     -0.301140E-02
     567 1S   54   ILE  HG11    3   0.900000E-01   1.00800           0   0.00000     -0.301140E-02
     568 1S   54   ILE  HG12    3   0.900000E-01   1.00800           0   0.00000     -0.301140E-02
     569 1S   54   ILE  CD     24  -0.270000       12.0110           0   0.00000     -0.301140E-02
     570 1S   54   ILE  HD1     3   0.900000E-01   1.00800           0   0.00000     -0.301140E-02
     571 1S   54   ILE  HD2     3   0.900000E-01   1.00800           0   0.00000     -0.301140E-02
     572 1S   54   ILE  HD3     3   0.900000E-01   1.00800           0   0.00000     -0.301140E-02
     573 1S   54   ILE  C      20   0.510000       12.0110           0   0.00000     -0.301140E-02
     574 1S   54   ILE  O      70  -0.510000       15.9990           0   0.00000     -0.301140E-02
     575 1S   55   THR  N      54  -0.470000       14.0070           0   0.00000     -0.301140E-02
     576 1S   55   THR  HN      1   0.310000       1.00800           0   0.00000     -0.301140E-02
     577 1S   55   THR  CA     22   0.700000E-01   12.0110           0   0.00000     -0.301140E-02
     578 1S   55   THR  HA      6   0.900000E-01   1.00800           0   0.00000     -0.301140E-02
     579 1S   55   THR  CB     22   0.140000       12.0110           0   0.00000     -0.301140E-02
     580 1S   55   THR  HB      3   0.900000E-01   1.00800           0   0.00000     -0.301140E-02
     581 1S   55   THR  OG1    73  -0.660000       15.9990           0   0.00000     -0.301140E-02
     582 1S   55   THR  HG1     1   0.430000       1.00800           0   0.00000     -0.301140E-02
     583 1S   55   THR  CG2    24  -0.270000       12.0110           0   0.00000     -0.301140E-02
     584 1S   55   THR  HG21    3   0.900000E-01   1.00800           0   0.00000     -0.301140E-02
     585 1S   55   THR  HG22    3   0.900000E-01   1.00800           0   0.00000     -0.301140E-02
     586 1S   55   THR  HG23    3   0.900000E-01   1.00800           0   0.00000     -0.301140E-02
     587 1S   55   THR  C      20   0.510000       12.0110           0   0.00000     -0.301140E-02
     588 1S   55   THR  O      70  -0.510000       15.9990           0   0.00000     -0.301140E-02
     589 1S   56   GLU  N      54  -0.470000       14.0070           0   0.00000     -0.301140E-02
     590 1S   56   GLU  HN      1   0.310000       1.00800           0   0.00000     -0.301140E-02
     591 1S   56   GLU  CA     22   0.700000E-01   12.0110           0   0.00000     -0.301140E-02
     592 1S   56   GLU  HA      6   0.900000E-01   1.00800           0   0.00000     -0.301140E-02
     593 1S   56   GLU  CB     23  -0.180000       12.0110           0   0.00000     -0.301140E-02
     594 1S   56   GLU  HB1     3   0.900000E-01   1.00800           0   0.00000     -0.301140E-02
     595 1S   56   GLU  HB2     3   0.900000E-01   1.00800           0   0.00000     -0.301140E-02
     596 1S   56   GLU  CG     23  -0.280000       12.0110           0   0.00000     -0.301140E-02
     597 1S   56   GLU  HG1     3   0.900000E-01   1.00800           0   0.00000     -0.301140E-02
     598 1S   56   GLU  HG2     3   0.900000E-01   1.00800           0   0.00000     -0.301140E-02
     599 1S   56   GLU  CD     32   0.620000       12.0110           0   0.00000     -0.301140E-02
     600 1S   56   GLU  OE1    72  -0.760000       15.9990           0   0.00000     -0.301140E-02
     601 1S   56   GLU  OE2    72  -0.760000       15.9990           0   0.00000     -0.301140E-02
     602 1S   56   GLU  C      20   0.510000       12.0110           0   0.00000     -0.301140E-02
     603 1S   56   GLU  O      70  -0.510000       15.9990           0   0.00000     -0.301140E-02
     604 1S   57   GLU  N      54  -0.470000       14.0070           0   0.00000     -0.301140E-02
     605 1S   57   GLU  HN      1   0.310000       1.00800           0   0.00000     -0.301140E-02
     606 1S   57   GLU  CA     22   0.700000E-01   12.0110           0   0.00000     -0.301140E-02
     607 1S   57   GLU  HA      6   0.900000E-01   1.00800           0   0.00000     -0.301140E-02
     608 1S   57   GLU  CB     23  -0.180000       12.0110           0   0.00000     -0.301140E-02
     609 1S   57   GLU  HB1     3   0.900000E-01   1.00800           0   0.00000     -0.301140E-02
     610 1S   57   GLU  HB2     3   0.900000E-01   1.00800           0   0.00000     -0.301140E-02
     611 1S   57   GLU  CG     23  -0.280000       12.0110           0   0.00000     -0.301140E-02
     612 1S   57   GLU  HG1     3   0.900000E-01   1.00800           0   0.00000     -0.301140E-02
     613 1S   57   GLU  HG2     3   0.900000E-01   1.00800           0   0.00000     -0.301140E-02
     614 1S   57   GLU  CD     32   0.620000       12.0110           0   0.00000     -0.301140E-02
     615 1S   57   GLU  OE1    72  -0.760000       15.9990           0   0.00000     -0.301140E-02
     616 1S   57   GLU  OE2    72  -0.760000       15.9990           0   0.00000     -0.301140E-02
     617 1S   57   GLU  C      20   0.510000       12.0110           0   0.00000     -0.301140E-02
     618 1S   57   GLU  O      70  -0.510000       15.9990           0   0.00000     -0.301140E-02
     619 1S   58   ASN  N      54  -0.470000       14.0070           0   0.00000     -0.301140E-02
     620 1S   58   ASN  HN      1   0.310000       1.00800           0   0.00000     -0.301140E-02
     621 1S   58   ASN  CA     22   0.700000E-01   12.0110           0   0.00000     -0.301140E-02
     622 1S   58   ASN  HA      6   0.900000E-01   1.00800           0   0.00000     -0.301140E-02
     623 1S   58   ASN  CB     23  -0.180000       12.0110           0   0.00000     -0.301140E-02
     624 1S   58   ASN  HB1     3   0.900000E-01   1.00800           0   0.00000     -0.301140E-02
     625 1S   58   ASN  HB2     3   0.900000E-01   1.00800           0   0.00000     -0.301140E-02
     626 1S   58   ASN  CG     32   0.550000       12.0110           0   0.00000     -0.301140E-02
     627 1S   58   ASN  OD1    70  -0.550000       15.9990           0   0.00000     -0.301140E-02
     628 1S   58   ASN  ND2    55  -0.620000       14.0070           0   0.00000     -0.301140E-02
     629 1S   58   ASN  HD21    1   0.320000       1.00800           0   0.00000     -0.301140E-02
     630 1S   58   ASN  HD22    1   0.300000       1.00800           0   0.00000     -0.301140E-02
     631 1S   58   ASN  C      20   0.510000       12.0110           0   0.00000     -0.301140E-02
     632 1S   58   ASN  O      70  -0.510000       15.9990           0   0.00000     -0.301140E-02
     633 1S   59   VAL  N      54  -0.470000       14.0070           0   0.00000     -0.301140E-02
     634 1S   59   VAL  HN      1   0.310000       1.00800           0   0.00000     -0.301140E-02
     635 1S   59   VAL  CA     22   0.700000E-01   12.0110           0   0.00000     -0.301140E-02
     636 1S   59   VAL  HA      6   0.900000E-01   1.00800           0   0.00000     -0.301140E-02
     637 1S   59   VAL  CB     22  -0.900000E-01   12.0110           0   0.00000     -0.301140E-02
     638 1S   59   VAL  HB      3   0.900000E-01   1.00800           0   0.00000     -0.301140E-02
     639 1S   59   VAL  CG1    24  -0.270000       12.0110           0   0.00000     -0.301140E-02
     640 1S   59   VAL  HG11    3   0.900000E-01   1.00800           0   0.00000     -0.301140E-02
     641 1S   59   VAL  HG12    3   0.900000E-01   1.00800           0   0.00000     -0.301140E-02
     642 1S   59   VAL  HG13    3   0.900000E-01   1.00800           0   0.00000     -0.301140E-02
     643 1S   59   VAL  CG2    24  -0.270000       12.0110           0   0.00000     -0.301140E-02
     644 1S   59   VAL  HG21    3   0.900000E-01   1.00800           0   0.00000     -0.301140E-02
     645 1S   59   VAL  HG22    3   0.900000E-01   1.00800           0   0.00000     -0.301140E-02
     646 1S   59   VAL  HG23    3   0.900000E-01   1.00800           0   0.00000     -0.301140E-02
     647 1S   59   VAL  C      20   0.510000       12.0110           0   0.00000     -0.301140E-02
     648 1S   59   VAL  O      70  -0.510000       15.9990           0   0.00000     -0.301140E-02
     649 1S   60   GLN  N      54  -0.470000       14.0070           0   0.00000     -0.301140E-02
     650 1S   60   GLN  HN      1   0.310000       1.00800           0   0.00000     -0.301140E-02
     651 1S   60   GLN  CA     22   0.700000E-01   12.0110           0   0.00000     -0.301140E-02
     652 1S   60   GLN  HA      6   0.900000E-01   1.00800           0   0.00000     -0.301140E-02
     653 1S   60   GLN  CB     23  -0.180000       12.0110           0   0.00000     -0.301140E-02
     654 1S   60   GLN  HB1     3   0.900000E-01   1.00800           0   0.00000     -0.301140E-02
     655 1S   60   GLN  HB2     3   0.900000E-01   1.00800           0   0.00000     -0.301140E-02
     656 1S   60   GLN  CG     23  -0.180000       12.0110           0   0.00000     -0.301140E-02
     657 1S   60   GLN  HG1     3   0.900000E-01   1.00800           0   0.00000     -0.301140E-02
     658 1S   60   GLN  HG2     3   0.900000E-01   1.00800           0   0.00000     -0.301140E-02
     659 1S   60   GLN  CD     32   0.550000       12.0110           0   0.00000     -0.301140E-02
     660 1S   60   GLN  OE1    70  -0.550000       15.9990           0   0.00000     -0.301140E-02
     661 1S   60   GLN  NE2    55  -0.620000       14.0070           0   0.00000     -0.301140E-02
     662 1S   60   GLN  HE21    1   0.320000       1.00800           0   0.00000     -0.301140E-02
     663 1S   60   GLN  HE22    1   0.300000       1.00800           0   0.00000     -0.301140E-02
     664 1S   60   GLN  C      20   0.510000       12.0110           0   0.00000     -0.301140E-02
     665 1S   60   GLN  O      70  -0.510000       15.9990           0   0.00000     -0.301140E-02
     666 1S   61   ASN  N      54  -0.470000       14.0070           0   0.00000     -0.301140E-02
     667 1S   61   ASN  HN      1   0.310000       1.00800           0   0.00000     -0.301140E-02
     668 1S   61   ASN  CA     22   0.700000E-01   12.0110           0   0.00000     -0.301140E-02
     669 1S   61   ASN  HA      6   0.900000E-01   1.00800           0   0.00000     -0.301140E-02
     670 1S   61   ASN  CB     23  -0.180000       12.0110           0   0.00000     -0.301140E-02
     671 1S   61   ASN  HB1     3   0.900000E-01   1.00800           0   0.00000     -0.301140E-02
     672 1S   61   ASN  HB2     3   0.900000E-01   1.00800           0   0.00000     -0.301140E-02
     673 1S   61   ASN  CG     32   0.550000       12.0110           0   0.00000     -0.301140E-02
     674 1S   61   ASN  OD1    70  -0.550000       15.9990           0   0.00000     -0.301140E-02
     675 1S   61   ASN  ND2    55  -0.620000       14.0070           0   0.00000     -0.301140E-02
     676 1S   61   ASN  HD21    1   0.320000       1.00800           0   0.00000     -0.301140E-02
     677 1S   61   ASN  HD22    1   0.300000       1.00800           0   0.00000     -0.301140E-02
     678 1S   61   ASN  C      20   0.510000       12.0110           0   0.00000     -0.301140E-02
     679 1S   61   ASN  O      70  -0.510000       15.9990           0   0.00000     -0.301140E-02
     680 1S   62   MET  N      54  -0.470000       14.0070           0   0.00000     -0.301140E-02
     681 1S   62   MET  HN      1   0.310000       1.00800           0   0.00000     -0.301140E-02
     682 1S   62   MET  CA     22   0.700000E-01   12.0110           0   0.00000     -0.301140E-02
     683 1S   62   MET  HA      6   0.900000E-01   1.00800           0   0.00000     -0.301140E-02
     684 1S   62   MET  CB     23  -0.180000       12.0110           0   0.00000     -0.301140E-02
     685 1S   62   MET  HB1     3   0.900000E-01   1.00800           0   0.00000     -0.301140E-02
     686 1S   62   MET  HB2     3   0.900000E-01   1.00800           0   0.00000     -0.301140E-02
     687 1S   62   MET  CG     23  -0.140000       12.0110           0   0.00000     -0.301140E-02
     688 1S   62   MET  HG1     3   0.900000E-01   1.00800           0   0.00000     -0.301140E-02
     689 1S   62   MET  HG2     3   0.900000E-01   1.00800           0   0.00000     -0.301140E-02
     690 1S   62   MET  SD     81  -0.900000E-01   32.0600           0   0.00000     -0.301140E-02
     691 1S   62   MET  CE     24  -0.220000       12.0110           0   0.00000     -0.301140E-02
     692 1S   62   MET  HE1     3   0.900000E-01   1.00800           0   0.00000     -0.301140E-02
     693 1S   62   MET  HE2     3   0.900000E-01   1.00800           0   0.00000     -0.301140E-02
     694 1S   62   MET  HE3     3   0.900000E-01   1.00800           0   0.00000     -0.301140E-02
     695 1S   62   MET  C      20   0.510000       12.0110           0   0.00000     -0.301140E-02
     696 1S   62   MET  O      70  -0.510000       15.9990           0   0.00000     -0.301140E-02
     697 1S   63   ASN  N      54  -0.470000       14.0070           0   0.00000     -0.301140E-02
     698 1S   63   ASN  HN      1   0.310000       1.00800           0   0.00000     -0.301140E-02
     699 1S   63   ASN  CA     22   0.700000E-01   12.0110           0   0.00000     -0.301140E-02
     700 1S   63   ASN  HA      6   0.900000E-01   1.00800           0   0.00000     -0.301140E-02
     701 1S   63   ASN  CB     23  -0.180000       12.0110           0   0.00000     -0.301140E-02
     702 1S   63   ASN  HB1     3   0.900000E-01   1.00800           0   0.00000     -0.301140E-02
     703 1S   63   ASN  HB2     3   0.900000E-01   1.00800           0   0.00000     -0.301140E-02
     704 1S   63   ASN  CG     32   0.550000       12.0110           0   0.00000     -0.301140E-02
     705 1S   63   ASN  OD1    70  -0.550000       15.9990           0   0.00000     -0.301140E-02
     706 1S   63   ASN  ND2    55  -0.620000       14.0070           0   0.00000     -0.301140E-02
     707 1S   63   ASN  HD21    1   0.320000       1.00800           0   0.00000     -0.301140E-02
     708 1S   63   ASN  HD22    1   0.300000       1.00800           0   0.00000     -0.301140E-02
     709 1S   63   ASN  C      20   0.510000       12.0110           0   0.00000     -0.301140E-02
     710 1S   63   ASN  O      70  -0.510000       15.9990           0   0.00000     -0.301140E-02
     711 1S   64   ASN  N      54  -0.470000       14.0070           0   0.00000     -0.301140E-02
     712 1S   64   ASN  HN      1   0.310000       1.00800           0   0.00000     -0.301140E-02
     713 1S   64   ASN  CA     22   0.700000E-01   12.0110           0   0.00000     -0.301140E-02
     714 1S   64   ASN  HA      6   0.900000E-01   1.00800           0   0.00000     -0.301140E-02
     715 1S   64   ASN  CB     23  -0.180000       12.0110           0   0.00000     -0.301140E-02
     716 1S   64   ASN  HB1     3   0.900000E-01   1.00800           0   0.00000     -0.301140E-02
     717 1S   64   ASN  HB2     3   0.900000E-01   1.00800           0   0.00000     -0.301140E-02
     718 1S   64   ASN  CG     32   0.550000       12.0110           0   0.00000     -0.301140E-02
     719 1S   64   ASN  OD1    70  -0.550000       15.9990           0   0.00000     -0.301140E-02
     720 1S   64   ASN  ND2    55  -0.620000       14.0070           0   0.00000     -0.301140E-02
     721 1S   64   ASN  HD21    1   0.320000       1.00800           0   0.00000     -0.301140E-02
     722 1S   64   ASN  HD22    1   0.300000       1.00800           0   0.00000     -0.301140E-02
     723 1S   64   ASN  C      20   0.510000       12.0110           0   0.00000     -0.301140E-02
     724 1S   64   ASN  O      70  -0.510000       15.9990           0   0.00000     -0.301140E-02
     725 1S   65   ALA  N      54  -0.470000       14.0070           0   0.00000     -0.301140E-02
     726 1S   65   ALA  HN      1   0.310000       1.00800           0   0.00000     -0.301140E-02
     727 1S   65   ALA  CA     22   0.700000E-01   12.0110           0   0.00000     -0.301140E-02
     728 1S   65   ALA  HA      6   0.900000E-01   1.00800           0   0.00000     -0.301140E-02
     729 1S   65   ALA  CB     24  -0.270000       12.0110           0   0.00000     -0.301140E-02
     730 1S   65   ALA  HB1     3   0.900000E-01   1.00800           0   0.00000     -0.301140E-02
     731 1S   65   ALA  HB2     3   0.900000E-01   1.00800           0   0.00000     -0.301140E-02
     732 1S   65   ALA  HB3     3   0.900000E-01   1.00800           0   0.00000     -0.301140E-02
     733 1S   65   ALA  C      20   0.510000       12.0110           0   0.00000     -0.301140E-02
     734 1S   65   ALA  O      70  -0.510000       15.9990           0   0.00000     -0.301140E-02
     735 1S   66   GLY  N      54  -0.470000       14.0070           0   0.00000     -0.301140E-02
     736 1S   66   GLY  HN      1   0.310000       1.00800           0   0.00000     -0.301140E-02
     737 1S   66   GLY  CA     23  -0.200000E-01   12.0110           0   0.00000     -0.301140E-02
     738 1S   66   GLY  HA1     6   0.900000E-01   1.00800           0   0.00000     -0.301140E-02
     739 1S   66   GLY  HA2     6   0.900000E-01   1.00800           0   0.00000     -0.301140E-02
     740 1S   66   GLY  C      20   0.510000       12.0110           0   0.00000     -0.301140E-02
     741 1S   66   GLY  O      70  -0.510000       15.9990           0   0.00000     -0.301140E-02
     742 1S   67   ASP  N      54  -0.470000       14.0070           0   0.00000     -0.301140E-02
     743 1S   67   ASP  HN      1   0.310000       1.00800           0   0.00000     -0.301140E-02
     744 1S   67   ASP  CA     22   0.700000E-01   12.0110           0   0.00000     -0.301140E-02
     745 1S   67   ASP  HA      6   0.900000E-01   1.00800           0   0.00000     -0.301140E-02
     746 1S   67   ASP  CB     23  -0.280000       12.0110           0   0.00000     -0.301140E-02
     747 1S   67   ASP  HB1     3   0.900000E-01   1.00800           0   0.00000     -0.301140E-02
     748 1S   67   ASP  HB2     3   0.900000E-01   1.00800           0   0.00000     -0.301140E-02
     749 1S   67   ASP  CG     32   0.620000       12.0110           0   0.00000     -0.301140E-02
     750 1S   67   ASP  OD1    72  -0.760000       15.9990           0   0.00000     -0.301140E-02
     751 1S   67   ASP  OD2    72  -0.760000       15.9990           0   0.00000     -0.301140E-02
     752 1S   67   ASP  C      20   0.510000       12.0110           0   0.00000     -0.301140E-02
     753 1S   67   ASP  O      70  -0.510000       15.9990           0   0.00000     -0.301140E-02
     754 1S   68   LYS  N      54  -0.470000       14.0070           0   0.00000     -0.301140E-02
     755 1S   68   LYS  HN      1   0.310000       1.00800           0   0.00000     -0.301140E-02
     756 1S   68   LYS  CA     22   0.700000E-01   12.0110           0   0.00000     -0.301140E-02
     757 1S   68   LYS  HA      6   0.900000E-01   1.00800           0   0.00000     -0.301140E-02
     758 1S   68   LYS  CB     23  -0.180000       12.0110           0   0.00000     -0.301140E-02
     759 1S   68   LYS  HB1     3   0.900000E-01   1.00800           0   0.00000     -0.301140E-02
     760 1S   68   LYS  HB2     3   0.900000E-01   1.00800           0   0.00000     -0.301140E-02
     761 1S   68   LYS  CG     23  -0.180000       12.0110           0   0.00000     -0.301140E-02
     762 1S   68   LYS  HG1     3   0.900000E-01   1.00800           0   0.00000     -0.301140E-02
     763 1S   68   LYS  HG2     3   0.900000E-01   1.00800           0   0.00000     -0.301140E-02
     764 1S   68   LYS  CD     23  -0.180000       12.0110           0   0.00000     -0.301140E-02
     765 1S   68   LYS  HD1     3   0.900000E-01   1.00800           0   0.00000     -0.301140E-02
     766 1S   68   LYS  HD2     3   0.900000E-01   1.00800           0   0.00000     -0.301140E-02
     767 1S   68   LYS  CE     23   0.210000       12.0110           0   0.00000     -0.301140E-02
     768 1S   68   LYS  HE1     3   0.500000E-01   1.00800           0   0.00000     -0.301140E-02
     769 1S   68   LYS  HE2     3   0.500000E-01   1.00800           0   0.00000     -0.301140E-02
     770 1S   68   LYS  NZ     56  -0.300000       14.0070           0   0.00000     -0.301140E-02
     771 1S   68   LYS  HZ1     2   0.330000       1.00800           0   0.00000     -0.301140E-02
     772 1S   68   LYS  HZ2     2   0.330000       1.00800           0   0.00000     -0.301140E-02
     773 1S   68   LYS  HZ3     2   0.330000       1.00800           0   0.00000     -0.301140E-02
     774 1S   68   LYS  C      20   0.510000       12.0110           0   0.00000     -0.301140E-02
     775 1S   68   LYS  O      70  -0.510000       15.9990           0   0.00000     -0.301140E-02
     776 1S   69   TRP  N      54  -0.470000       14.0070           0   0.00000     -0.301140E-02
     777 1S   69   TRP  HN      1   0.310000       1.00800           0   0.00000     -0.301140E-02
     778 1S   69   TRP  CA     22   0.700000E-01   12.0110           0   0.00000     -0.301140E-02
     779 1S   69   TRP  HA      6   0.900000E-01   1.00800           0   0.00000     -0.301140E-02
     780 1S   69   TRP  CB     23  -0.180000       12.0110           0   0.00000     -0.301140E-02
     781 1S   69   TRP  HB1     3   0.900000E-01   1.00800           0   0.00000     -0.301140E-02
     782 1S   69   TRP  HB2     3   0.900000E-01   1.00800           0   0.00000     -0.301140E-02
     783 1S   69   TRP  CG     28  -0.300000E-01   12.0110           0   0.00000     -0.301140E-02
     784 1S   69   TRP  CD1    21   0.350000E-01   12.0110           0   0.00000     -0.301140E-02
     785 1S   69   TRP  HD1     5   0.115000       1.00800           0   0.00000     -0.301140E-02
     786 1S   69   TRP  NE1    58  -0.610000       14.0070           0   0.00000     -0.301140E-02
     787 1S   69   TRP  HE1     1   0.380000       1.00800           0   0.00000     -0.301140E-02
     788 1S   69   TRP  CE2    27   0.130000       12.0110           0   0.00000     -0.301140E-02
     789 1S   69   TRP  CD2    27  -0.200000E-01   12.0110           0   0.00000     -0.301140E-02
     790 1S   69   TRP  CE3    21  -0.115000       12.0110           0   0.00000     -0.301140E-02
     791 1S   69   TRP  HE3     5   0.115000       1.00800           0   0.00000     -0.301140E-02
     792 1S   69   TRP  CZ3    21  -0.115000       12.0110           0   0.00000     -0.301140E-02
     793 1S   69   TRP  HZ3     5   0.115000       1.00800           0   0.00000     -0.301140E-02
     794 1S   69   TRP  CZ2    21  -0.115000       12.0110           0   0.00000     -0.301140E-02
     795 1S   69   TRP  HZ2     5   0.115000       1.00800           0   0.00000     -0.301140E-02
     796 1S   69   TRP  CH2    21  -0.115000       12.0110           0   0.00000     -0.301140E-02
     797 1S   69   TRP  HH2     5   0.115000       1.00800           0   0.00000     -0.301140E-02
     798 1S   69   TRP  C      20   0.510000       12.0110           0   0.00000     -0.301140E-02
     799 1S   69   TRP  O      70  -0.510000       15.9990           0   0.00000     -0.301140E-02
     800 1S   70   SER  N      54  -0.470000       14.0070           0   0.00000     -0.301140E-02
     801 1S   70   SER  HN      1   0.310000       1.00800           0   0.00000     -0.301140E-02
     802 1S   70   SER  CA     22   0.700000E-01   12.0110           0   0.00000     -0.301140E-02
     803 1S   70   SER  HA      6   0.900000E-01   1.00800           0   0.00000     -0.301140E-02
     804 1S   70   SER  CB     23   0.500000E-01   12.0110           0   0.00000     -0.301140E-02
     805 1S   70   SER  HB1     3   0.900000E-01   1.00800           0   0.00000     -0.301140E-02
     806 1S   70   SER  HB2     3   0.900000E-01   1.00800           0   0.00000     -0.301140E-02
     807 1S   70   SER  OG     73  -0.660000       15.9990           0   0.00000     -0.301140E-02
     808 1S   70   SER  HG1     1   0.430000       1.00800           0   0.00000     -0.301140E-02
     809 1S   70   SER  C      20   0.510000       12.0110           0   0.00000     -0.301140E-02
     810 1S   70   SER  O      70  -0.510000       15.9990           0   0.00000     -0.301140E-02
     811 1S   71   ALA  N      54  -0.470000       14.0070           0   0.00000     -0.301140E-02
     812 1S   71   ALA  HN      1   0.310000       1.00800           0   0.00000     -0.301140E-02
     813 1S   71   ALA  CA     22   0.700000E-01   12.0110           0   0.00000     -0.301140E-02
     814 1S   71   ALA  HA      6   0.900000E-01   1.00800           0   0.00000     -0.301140E-02
     815 1S   71   ALA  CB     24  -0.270000       12.0110           0   0.00000     -0.301140E-02
     816 1S   71   ALA  HB1     3   0.900000E-01   1.00800           0   0.00000     -0.301140E-02
     817 1S   71   ALA  HB2     3   0.900000E-01   1.00800           0   0.00000     -0.301140E-02
     818 1S   71   ALA  HB3     3   0.900000E-01   1.00800           0   0.00000     -0.301140E-02
     819 1S   71   ALA  C      20   0.510000       12.0110           0   0.00000     -0.301140E-02
     820 1S   71   ALA  O      70  -0.510000       15.9990           0   0.00000     -0.301140E-02
     821 1S   72   PHE  N      54  -0.470000       14.0070           0   0.00000     -0.301140E-02
     822 1S   72   PHE  HN      1   0.310000       1.00800           0   0.00000     -0.301140E-02
     823 1S   72   PHE  CA     22   0.700000E-01   12.0110           0   0.00000     -0.301140E-02
     824 1S   72   PHE  HA      6   0.900000E-01   1.00800           0   0.00000     -0.301140E-02
     825 1S   72   PHE  CB     23  -0.180000       12.0110           0   0.00000     -0.301140E-02
     826 1S   72   PHE  HB1     3   0.900000E-01   1.00800           0   0.00000     -0.301140E-02
     827 1S   72   PHE  HB2     3   0.900000E-01   1.00800           0   0.00000     -0.301140E-02
     828 1S   72   PHE  CG     21    0.00000       12.0110           0   0.00000     -0.301140E-02
     829 1S   72   PHE  CD1    21  -0.115000       12.0110           0   0.00000     -0.301140E-02
     830 1S   72   PHE  HD1     5   0.115000       1.00800           0   0.00000     -0.301140E-02
     831 1S   72   PHE  CE1    21  -0.115000       12.0110           0   0.00000     -0.301140E-02
     832 1S   72   PHE  HE1     5   0.115000       1.00800           0   0.00000     -0.301140E-02
     833 1S   72   PHE  CZ     21  -0.115000       12.0110           0   0.00000     -0.301140E-02
     834 1S   72   PHE  HZ      5   0.115000       1.00800           0   0.00000     -0.301140E-02
     835 1S   72   PHE  CD2    21  -0.115000       12.0110           0   0.00000     -0.301140E-02
     836 1S   72   PHE  HD2     5   0.115000       1.00800           0   0.00000     -0.301140E-02
     837 1S   72   PHE  CE2    21  -0.115000       12.0110           0   0.00000     -0.301140E-02
     838 1S   72   PHE  HE2     5   0.115000       1.00800           0   0.00000     -0.301140E-02
     839 1S   72   PHE  C      20   0.510000       12.0110           0   0.00000     -0.301140E-02
     840 1S   72   PHE  O      70  -0.510000       15.9990           0   0.00000     -0.301140E-02
     841 1S   73   LEU  N      54  -0.470000       14.0070           0   0.00000     -0.301140E-02
     842 1S   73   LEU  HN      1   0.310000       1.00800           0   0.00000     -0.301140E-02
     843 1S   73   LEU  CA     22   0.700000E-01   12.0110           0   0.00000     -0.301140E-02
     844 1S   73   LEU  HA      6   0.900000E-01   1.00800           0   0.00000     -0.301140E-02
     845 1S   73   LEU  CB     23  -0.180000       12.0110           0   0.00000     -0.301140E-02
     846 1S   73   LEU  HB1     3   0.900000E-01   1.00800           0   0.00000     -0.301140E-02
     847 1S   73   LEU  HB2     3   0.900000E-01   1.00800           0   0.00000     -0.301140E-02
     848 1S   73   LEU  CG     22  -0.900000E-01   12.0110           0   0.00000     -0.301140E-02
     849 1S   73   LEU  HG      3   0.900000E-01   1.00800           0   0.00000     -0.301140E-02
     850 1S   73   LEU  CD1    24  -0.270000       12.0110           0   0.00000     -0.301140E-02
     851 1S   73   LEU  HD11    3   0.900000E-01   1.00800           0   0.00000     -0.301140E-02
     852 1S   73   LEU  HD12    3   0.900000E-01   1.00800           0   0.00000     -0.301140E-02
     853 1S   73   LEU  HD13    3   0.900000E-01   1.00800           0   0.00000     -0.301140E-02
     854 1S   73   LEU  CD2    24  -0.270000       12.0110           0   0.00000     -0.301140E-02
     855 1S   73   LEU  HD21    3   0.900000E-01   1.00800           0   0.00000     -0.301140E-02
     856 1S   73   LEU  HD22    3   0.900000E-01   1.00800           0   0.00000     -0.301140E-02
     857 1S   73   LEU  HD23    3   0.900000E-01   1.00800           0   0.00000     -0.301140E-02
     858 1S   73   LEU  C      20   0.510000       12.0110           0   0.00000     -0.301140E-02
     859 1S   73   LEU  O      70  -0.510000       15.9990           0   0.00000     -0.301140E-02
     860 1S   74   LYS  N      54  -0.470000       14.0070           0   0.00000     -0.301140E-02
     861 1S   74   LYS  HN      1   0.310000       1.00800           0   0.00000     -0.301140E-02
     862 1S   74   LYS  CA     22   0.700000E-01   12.0110           0   0.00000     -0.301140E-02
     863 1S   74   LYS  HA      6   0.900000E-01   1.00800           0   0.00000     -0.301140E-02
     864 1S   74   LYS  CB     23  -0.180000       12.0110           0   0.00000     -0.301140E-02
     865 1S   74   LYS  HB1     3   0.900000E-01   1.00800           0   0.00000     -0.301140E-02
     866 1S   74   LYS  HB2     3   0.900000E-01   1.00800           0   0.00000     -0.301140E-02
     867 1S   74   LYS  CG     23  -0.180000       12.0110           0   0.00000     -0.301140E-02
     868 1S   74   LYS  HG1     3   0.900000E-01   1.00800           0   0.00000     -0.301140E-02
     869 1S   74   LYS  HG2     3   0.900000E-01   1.00800           0   0.00000     -0.301140E-02
     870 1S   74   LYS  CD     23  -0.180000       12.0110           0   0.00000     -0.301140E-02
     871 1S   74   LYS  HD1     3   0.900000E-01   1.00800           0   0.00000     -0.301140E-02
     872 1S   74   LYS  HD2     3   0.900000E-01   1.00800           0   0.00000     -0.301140E-02
     873 1S   74   LYS  CE     23   0.210000       12.0110           0   0.00000     -0.301140E-02
     874 1S   74   LYS  HE1     3   0.500000E-01   1.00800           0   0.00000     -0.301140E-02
     875 1S   74   LYS  HE2     3   0.500000E-01   1.00800           0   0.00000     -0.301140E-02
     876 1S   74   LYS  NZ     56  -0.300000       14.0070           0   0.00000     -0.301140E-02
     877 1S   74   LYS  HZ1     2   0.330000       1.00800           0   0.00000     -0.301140E-02
     878 1S   74   LYS  HZ2     2   0.330000       1.00800           0   0.00000     -0.301140E-02
     879 1S   74   LYS  HZ3     2   0.330000       1.00800           0   0.00000     -0.301140E-02
     880 1S   74   LYS  C      20   0.510000       12.0110           0   0.00000     -0.301140E-02
     881 1S   74   LYS  O      70  -0.510000       15.9990           0   0.00000     -0.301140E-02
     882 1S   75   GLU  N      54  -0.470000       14.0070           0   0.00000     -0.301140E-02
     883 1S   75   GLU  HN      1   0.310000       1.00800           0   0.00000     -0.301140E-02
     884 1S   75   GLU  CA     22   0.700000E-01   12.0110           0   0.00000     -0.301140E-02
     885 1S   75   GLU  HA      6   0.900000E-01   1.00800           0   0.00000     -0.301140E-02
     886 1S   75   GLU  CB     23  -0.180000       12.0110           0   0.00000     -0.301140E-02
     887 1S   75   GLU  HB1     3   0.900000E-01   1.00800           0   0.00000     -0.301140E-02
     888 1S   75   GLU  HB2     3   0.900000E-01   1.00800           0   0.00000     -0.301140E-02
     889 1S   75   GLU  CG     23  -0.280000       12.0110           0   0.00000     -0.301140E-02
     890 1S   75   GLU  HG1     3   0.900000E-01   1.00800           0   0.00000     -0.301140E-02
     891 1S   75   GLU  HG2     3   0.900000E-01   1.00800           0   0.00000     -0.301140E-02
     892 1S   75   GLU  CD     32   0.620000       12.0110           0   0.00000     -0.301140E-02
     893 1S   75   GLU  OE1    72  -0.760000       15.9990           0   0.00000     -0.301140E-02
     894 1S   75   GLU  OE2    72  -0.760000       15.9990           0   0.00000     -0.301140E-02
     895 1S   75   GLU  C      20   0.510000       12.0110           0   0.00000     -0.301140E-02
     896 1S   75   GLU  O      70  -0.510000       15.9990           0   0.00000     -0.301140E-02
     897 1S   76   GLN  N      54  -0.470000       14.0070           0   0.00000     -0.301140E-02
     898 1S   76   GLN  HN      1   0.310000       1.00800           0   0.00000     -0.301140E-02
     899 1S   76   GLN  CA     22   0.700000E-01   12.0110           0   0.00000     -0.301140E-02
     900 1S   76   GLN  HA      6   0.900000E-01   1.00800           0   0.00000     -0.301140E-02
     901 1S   76   GLN  CB     23  -0.180000       12.0110           0   0.00000     -0.301140E-02
     902 1S   76   GLN  HB1     3   0.900000E-01   1.00800           0   0.00000     -0.301140E-02
     903 1S   76   GLN  HB2     3   0.900000E-01   1.00800           0   0.00000     -0.301140E-02
     904 1S   76   GLN  CG     23  -0.180000       12.0110           0   0.00000     -0.301140E-02
     905 1S   76   GLN  HG1     3   0.900000E-01   1.00800           0   0.00000     -0.301140E-02
     906 1S   76   GLN  HG2     3   0.900000E-01   1.00800           0   0.00000     -0.301140E-02
     907 1S   76   GLN  CD     32   0.550000       12.0110           0   0.00000     -0.301140E-02
     908 1S   76   GLN  OE1    70  -0.550000       15.9990           0   0.00000     -0.301140E-02
     909 1S   76   GLN  NE2    55  -0.620000       14.0070           0   0.00000     -0.301140E-02
     910 1S   76   GLN  HE21    1   0.320000       1.00800           0   0.00000     -0.301140E-02
     911 1S   76   GLN  HE22    1   0.300000       1.00800           0   0.00000     -0.301140E-02
     912 1S   76   GLN  C      20   0.510000       12.0110           0   0.00000     -0.301140E-02
     913 1S   76   GLN  O      70  -0.510000       15.9990           0   0.00000     -0.301140E-02
     914 1S   77   SER  N      54  -0.470000       14.0070           0   0.00000     -0.301140E-02
     915 1S   77   SER  HN      1   0.310000       1.00800           0   0.00000     -0.301140E-02
     916 1S   77   SER  CA     22   0.700000E-01   12.0110           0   0.00000     -0.301140E-02
     917 1S   77   SER  HA      6   0.900000E-01   1.00800           0   0.00000     -0.301140E-02
     918 1S   77   SER  CB     23   0.500000E-01   12.0110           0   0.00000     -0.301140E-02
     919 1S   77   SER  HB1     3   0.900000E-01   1.00800           0   0.00000     -0.301140E-02
     920 1S   77   SER  HB2     3   0.900000E-01   1.00800           0   0.00000     -0.301140E-02
     921 1S   77   SER  OG     73  -0.660000       15.9990           0   0.00000     -0.301140E-02
     922 1S   77   SER  HG1     1   0.430000       1.00800           0   0.00000     -0.301140E-02
     923 1S   77   SER  C      20   0.510000       12.0110           0   0.00000     -0.301140E-02
     924 1S   77   SER  O      70  -0.510000       15.9990           0   0.00000     -0.301140E-02
     925 1S   78   THR  N      54  -0.470000       14.0070           0   0.00000     -0.301140E-02
     926 1S   78   THR  HN      1   0.310000       1.00800           0   0.00000     -0.301140E-02
     927 1S   78   THR  CA     22   0.700000E-01   12.0110           0   0.00000     -0.301140E-02
     928 1S   78   THR  HA      6   0.900000E-01   1.00800           0   0.00000     -0.301140E-02
     929 1S   78   THR  CB     22   0.140000       12.0110           0   0.00000     -0.301140E-02
     930 1S   78   THR  HB      3   0.900000E-01   1.00800           0   0.00000     -0.301140E-02
     931 1S   78   THR  OG1    73  -0.660000       15.9990           0   0.00000     -0.301140E-02
     932 1S   78   THR  HG1     1   0.430000       1.00800           0   0.00000     -0.301140E-02
     933 1S   78   THR  CG2    24  -0.270000       12.0110           0   0.00000     -0.301140E-02
     934 1S   78   THR  HG21    3   0.900000E-01   1.00800           0   0.00000     -0.301140E-02
     935 1S   78   THR  HG22    3   0.900000E-01   1.00800           0   0.00000     -0.301140E-02
     936 1S   78   THR  HG23    3   0.900000E-01   1.00800           0   0.00000     -0.301140E-02
     937 1S   78   THR  C      20   0.510000       12.0110           0   0.00000     -0.301140E-02
     938 1S   78   THR  O      70  -0.510000       15.9990           0   0.00000     -0.301140E-02
     939 1S   79   LEU  N      54  -0.470000       14.0070           0   0.00000     -0.301140E-02
     940 1S   79   LEU  HN      1   0.310000       1.00800           0   0.00000     -0.301140E-02
     941 1S   79   LEU  CA     22   0.700000E-01   12.0110           0   0.00000     -0.301140E-02
     942 1S   79   LEU  HA      6   0.900000E-01   1.00800           0   0.00000     -0.301140E-02
     943 1S   79   LEU  CB     23  -0.180000       12.0110           0   0.00000     -0.301140E-02
     944 1S   79   LEU  HB1     3   0.900000E-01   1.00800           0   0.00000     -0.301140E-02
     945 1S   79   LEU  HB2     3   0.900000E-01   1.00800           0   0.00000     -0.301140E-02
     946 1S   79   LEU  CG     22  -0.900000E-01   12.0110           0   0.00000     -0.301140E-02
     947 1S   79   LEU  HG      3   0.900000E-01   1.00800           0   0.00000     -0.301140E-02
     948 1S   79   LEU  CD1    24  -0.270000       12.0110           0   0.00000     -0.301140E-02
     949 1S   79   LEU  HD11    3   0.900000E-01   1.00800           0   0.00000     -0.301140E-02
     950 1S   79   LEU  HD12    3   0.900000E-01   1.00800           0   0.00000     -0.301140E-02
     951 1S   79   LEU  HD13    3   0.900000E-01   1.00800           0   0.00000     -0.301140E-02
     952 1S   79   LEU  CD2    24  -0.270000       12.0110           0   0.00000     -0.301140E-02
     953 1S   79   LEU  HD21    3   0.900000E-01   1.00800           0   0.00000     -0.301140E-02
     954 1S   79   LEU  HD22    3   0.900000E-01   1.00800           0   0.00000     -0.301140E-02
     955 1S   79   LEU  HD23    3   0.900000E-01   1.00800           0   0.00000     -0.301140E-02
     956 1S   79   LEU  C      20   0.510000       12.0110           0   0.00000     -0.301140E-02
     957 1S   79   LEU  O      70  -0.510000       15.9990           0   0.00000     -0.301140E-02
     958 1S   80   ALA  N      54  -0.470000       14.0070           0   0.00000     -0.301140E-02
     959 1S   80   ALA  HN      1   0.310000       1.00800           0   0.00000     -0.301140E-02
     960 1S   80   ALA  CA     22   0.700000E-01   12.0110           0   0.00000     -0.301140E-02
     961 1S   80   ALA  HA      6   0.900000E-01   1.00800           0   0.00000     -0.301140E-02
     962 1S   80   ALA  CB     24  -0.270000       12.0110           0   0.00000     -0.301140E-02
     963 1S   80   ALA  HB1     3   0.900000E-01   1.00800           0   0.00000     -0.301140E-02
     964 1S   80   ALA  HB2     3   0.900000E-01   1.00800           0   0.00000     -0.301140E-02
     965 1S   80   ALA  HB3     3   0.900000E-01   1.00800           0   0.00000     -0.301140E-02
     966 1S   80   ALA  C      20   0.510000       12.0110           0   0.00000     -0.301140E-02
     967 1S   80   ALA  O      70  -0.510000       15.9990           0   0.00000     -0.301140E-02
     968 1S   81   GLN  N      54  -0.470000       14.0070           0   0.00000     -0.301140E-02
     969 1S   81   GLN  HN      1   0.310000       1.00800           0   0.00000     -0.301140E-02
     970 1S   81   GLN  CA     22   0.700000E-01   12.0110           0   0.00000     -0.301140E-02
     971 1S   81   GLN  HA      6   0.900000E-01   1.00800           0   0.00000     -0.301140E-02
     972 1S   81   GLN  CB     23  -0.180000       12.0110           0   0.00000     -0.301140E-02
     973 1S   81   GLN  HB1     3   0.900000E-01   1.00800           0   0.00000     -0.301140E-02
     974 1S   81   GLN  HB2     3   0.900000E-01   1.00800           0   0.00000     -0.301140E-02
     975 1S   81   GLN  CG     23  -0.180000       12.0110           0   0.00000     -0.301140E-02
     976 1S   81   GLN  HG1     3   0.900000E-01   1.00800           0   0.00000     -0.301140E-02
     977 1S   81   GLN  HG2     3   0.900000E-01   1.00800           0   0.00000     -0.301140E-02
     978 1S   81   GLN  CD     32   0.550000       12.0110           0   0.00000     -0.301140E-02
     979 1S   81   GLN  OE1    70  -0.550000       15.9990           0   0.00000     -0.301140E-02
     980 1S   81   GLN  NE2    55  -0.620000       14.0070           0   0.00000     -0.301140E-02
     981 1S   81   GLN  HE21    1   0.320000       1.00800           0   0.00000     -0.301140E-02
     982 1S   81   GLN  HE22    1   0.300000       1.00800           0   0.00000     -0.301140E-02
     983 1S   81   GLN  C      20   0.510000       12.0110           0   0.00000     -0.301140E-02
     984 1S   81   GLN  O      70  -0.510000       15.9990           0   0.00000     -0.301140E-02
     985 1S   82   MET  N      54  -0.470000       14.0070           0   0.00000     -0.301140E-02
     986 1S   82   MET  HN      1   0.310000       1.00800           0   0.00000     -0.301140E-02
     987 1S   82   MET  CA     22   0.700000E-01   12.0110           0   0.00000     -0.301140E-02
     988 1S   82   MET  HA      6   0.900000E-01   1.00800           0   0.00000     -0.301140E-02
     989 1S   82   MET  CB     23  -0.180000       12.0110           0   0.00000     -0.301140E-02
     990 1S   82   MET  HB1     3   0.900000E-01   1.00800           0   0.00000     -0.301140E-02
     991 1S   82   MET  HB2     3   0.900000E-01   1.00800           0   0.00000     -0.301140E-02
     992 1S   82   MET  CG     23  -0.140000       12.0110           0   0.00000     -0.301140E-02
     993 1S   82   MET  HG1     3   0.900000E-01   1.00800           0   0.00000     -0.301140E-02
     994 1S   82   MET  HG2     3   0.900000E-01   1.00800           0   0.00000     -0.301140E-02
     995 1S   82   MET  SD     81  -0.900000E-01   32.0600           0   0.00000     -0.301140E-02
     996 1S   82   MET  CE     24  -0.220000       12.0110           0   0.00000     -0.301140E-02
     997 1S   82   MET  HE1     3   0.900000E-01   1.00800           0   0.00000     -0.301140E-02
     998 1S   82   MET  HE2     3   0.900000E-01   1.00800           0   0.00000     -0.301140E-02
     999 1S   82   MET  HE3     3   0.900000E-01   1.00800           0   0.00000     -0.301140E-02
    1000 1S   82   MET  C      20   0.510000       12.0110           0   0.00000     -0.301140E-02
    1001 1S   82   MET  O      70  -0.510000       15.9990           0   0.00000     -0.301140E-02
    1002 1S   83   TYR  N      54  -0.470000       14.0070           0   0.00000     -0.301140E-02
    1003 1S   83   TYR  HN      1   0.310000       1.00800           0   0.00000     -0.301140E-02
    1004 1S   83   TYR  CA     22   0.700000E-01   12.0110           0   0.00000     -0.301140E-02
    1005 1S   83   TYR  HA      6   0.900000E-01   1.00800           0   0.00000     -0.301140E-02
    1006 1S   83   TYR  CB     23  -0.180000       12.0110           0   0.00000     -0.301140E-02
    1007 1S   83   TYR  HB1     3   0.900000E-01   1.00800           0   0.00000     -0.301140E-02
    1008 1S   83   TYR  HB2     3   0.900000E-01   1.00800           0   0.00000     -0.301140E-02
    1009 1S   83   TYR  CG     21    0.00000       12.0110           0   0.00000     -0.301140E-02
    1010 1S   83   TYR  CD1    21  -0.115000       12.0110           0   0.00000     -0.301140E-02
    1011 1S   83   TYR  HD1     5   0.115000       1.00800           0   0.00000     -0.301140E-02
    1012 1S   83   TYR  CE1    21  -0.115000       12.0110           0   0.00000     -0.301140E-02
    1013 1S   83   TYR  HE1     5   0.115000       1.00800           0   0.00000     -0.301140E-02
    1014 1S   83   TYR  CZ     21   0.110000       12.0110           0   0.00000     -0.301140E-02
    1015 1S   83   TYR  OH     73  -0.540000       15.9990           0   0.00000     -0.301140E-02
    1016 1S   83   TYR  HH      1   0.430000       1.00800           0   0.00000     -0.301140E-02
    1017 1S   83   TYR  CD2    21  -0.115000       12.0110           0   0.00000     -0.301140E-02
    1018 1S   83   TYR  HD2     5   0.115000       1.00800           0   0.00000     -0.301140E-02
    1019 1S   83   TYR  CE2    21  -0.115000       12.0110           0   0.00000     -0.301140E-02
    1020 1S   83   TYR  HE2     5   0.115000       1.00800           0   0.00000     -0.301140E-02
    1021 1S   83   TYR  C      20   0.510000       12.0110           0   0.00000     -0.301140E-02
    1022 1S   83   TYR  O      70  -0.510000       15.9990           0   0.00000     -0.301140E-02
    1023 1S   84   PRO  N      50  -0.290000       14.0070           0   0.00000     -0.301140E-02
    1024 1S   84   PRO  CD     31    0.00000       12.0110           0   0.00000     -0.301140E-02
    1025 1S   84   PRO  HD1     3   0.900000E-01   1.00800           0   0.00000     -0.301140E-02
    1026 1S   84   PRO  HD2     3   0.900000E-01   1.00800           0   0.00000     -0.301140E-02
    1027 1S   84   PRO  CA     29   0.200000E-01   12.0110           0   0.00000     -0.301140E-02
    1028 1S   84   PRO  HA      6   0.900000E-01   1.00800           0   0.00000     -0.301140E-02
    1029 1S   84   PRO  CB     30  -0.180000       12.0110           0   0.00000     -0.301140E-02
    1030 1S   84   PRO  HB1     3   0.900000E-01   1.00800           0   0.00000     -0.301140E-02
    1031 1S   84   PRO  HB2     3   0.900000E-01   1.00800           0   0.00000     -0.301140E-02
    1032 1S   84   PRO  CG     30  -0.180000       12.0110           0   0.00000     -0.301140E-02
    1033 1S   84   PRO  HG1     3   0.900000E-01   1.00800           0   0.00000     -0.301140E-02
    1034 1S   84   PRO  HG2     3   0.900000E-01   1.00800           0   0.00000     -0.301140E-02
    1035 1S   84   PRO  C      20   0.510000       12.0110           0   0.00000     -0.301140E-02
    1036 1S   84   PRO  O      70  -0.510000       15.9990           0   0.00000     -0.301140E-02
    1037 1S   85   LEU  N      54  -0.470000       14.0070           0   0.00000     -0.301140E-02
    1038 1S   85   LEU  HN      1   0.310000       1.00800           0   0.00000     -0.301140E-02
    1039 1S   85   LEU  CA     22   0.700000E-01   12.0110           0   0.00000     -0.301140E-02
    1040 1S   85   LEU  HA      6   0.900000E-01   1.00800           0   0.00000     -0.301140E-02
    1041 1S   85   LEU  CB     23  -0.180000       12.0110           0   0.00000     -0.301140E-02
    1042 1S   85   LEU  HB1     3   0.900000E-01   1.00800           0   0.00000     -0.301140E-02
    1043 1S   85   LEU  HB2     3   0.900000E-01   1.00800           0   0.00000     -0.301140E-02
    1044 1S   85   LEU  CG     22  -0.900000E-01   12.0110           0   0.00000     -0.301140E-02
    1045 1S   85   LEU  HG      3   0.900000E-01   1.00800           0   0.00000     -0.301140E-02
    1046 1S   85   LEU  CD1    24  -0.270000       12.0110           0   0.00000     -0.301140E-02
    1047 1S   85   LEU  HD11    3   0.900000E-01   1.00800           0   0.00000     -0.301140E-02
    1048 1S   85   LEU  HD12    3   0.900000E-01   1.00800           0   0.00000     -0.301140E-02
    1049 1S   85   LEU  HD13    3   0.900000E-01   1.00800           0   0.00000     -0.301140E-02
    1050 1S   85   LEU  CD2    24  -0.270000       12.0110           0   0.00000     -0.301140E-02
    1051 1S   85   LEU  HD21    3   0.900000E-01   1.00800           0   0.00000     -0.301140E-02
    1052 1S   85   LEU  HD22    3   0.900000E-01   1.00800           0   0.00000     -0.301140E-02
    1053 1S   85   LEU  HD23    3   0.900000E-01   1.00800           0   0.00000     -0.301140E-02
    1054 1S   85   LEU  C      20   0.510000       12.0110           0   0.00000     -0.301140E-02
    1055 1S   85   LEU  O      70  -0.510000       15.9990           0   0.00000     -0.301140E-02
    1056 1S   86   GLN  N      54  -0.470000       14.0070           0   0.00000     -0.301140E-02
    1057 1S   86   GLN  HN      1   0.310000       1.00800           0   0.00000     -0.301140E-02
    1058 1S   86   GLN  CA     22   0.700000E-01   12.0110           0   0.00000     -0.301140E-02
    1059 1S   86   GLN  HA      6   0.900000E-01   1.00800           0   0.00000     -0.301140E-02
    1060 1S   86   GLN  CB     23  -0.180000       12.0110           0   0.00000     -0.301140E-02
    1061 1S   86   GLN  HB1     3   0.900000E-01   1.00800           0   0.00000     -0.301140E-02
    1062 1S   86   GLN  HB2     3   0.900000E-01   1.00800           0   0.00000     -0.301140E-02
    1063 1S   86   GLN  CG     23  -0.180000       12.0110           0   0.00000     -0.301140E-02
    1064 1S   86   GLN  HG1     3   0.900000E-01   1.00800           0   0.00000     -0.301140E-02
    1065 1S   86   GLN  HG2     3   0.900000E-01   1.00800           0   0.00000     -0.301140E-02
    1066 1S   86   GLN  CD     32   0.550000       12.0110           0   0.00000     -0.301140E-02
    1067 1S   86   GLN  OE1    70  -0.550000       15.9990           0   0.00000     -0.301140E-02
    1068 1S   86   GLN  NE2    55  -0.620000       14.0070           0   0.00000     -0.301140E-02
    1069 1S   86   GLN  HE21    1   0.320000       1.00800           0   0.00000     -0.301140E-02
    1070 1S   86   GLN  HE22    1   0.300000       1.00800           0   0.00000     -0.301140E-02
    1071 1S   86   GLN  C      20   0.510000       12.0110           0   0.00000     -0.301140E-02
    1072 1S   86   GLN  O      70  -0.510000       15.9990           0   0.00000     -0.301140E-02
    1073 1S   87   GLU  N      54  -0.470000       14.0070           0   0.00000     -0.301140E-02
    1074 1S   87   GLU  HN      1   0.310000       1.00800           0   0.00000     -0.301140E-02
    1075 1S   87   GLU  CA     22   0.700000E-01   12.0110           0   0.00000     -0.301140E-02
    1076 1S   87   GLU  HA      6   0.900000E-01   1.00800           0   0.00000     -0.301140E-02
    1077 1S   87   GLU  CB     23  -0.180000       12.0110           0   0.00000     -0.301140E-02
    1078 1S   87   GLU  HB1     3   0.900000E-01   1.00800           0   0.00000     -0.301140E-02
    1079 1S   87   GLU  HB2     3   0.900000E-01   1.00800           0   0.00000     -0.301140E-02
    1080 1S   87   GLU  CG     23  -0.280000       12.0110           0   0.00000     -0.301140E-02
    1081 1S   87   GLU  HG1     3   0.900000E-01   1.00800           0   0.00000     -0.301140E-02
    1082 1S   87   GLU  HG2     3   0.900000E-01   1.00800           0   0.00000     -0.301140E-02
    1083 1S   87   GLU  CD     32   0.620000       12.0110           0   0.00000     -0.301140E-02
    1084 1S   87   GLU  OE1    72  -0.760000       15.9990           0   0.00000     -0.301140E-02
    1085 1S   87   GLU  OE2    72  -0.760000       15.9990           0   0.00000     -0.301140E-02
    1086 1S   87   GLU  C      20   0.510000       12.0110           0   0.00000     -0.301140E-02
    1087 1S   87   GLU  O      70  -0.510000       15.9990           0   0.00000     -0.301140E-02
    1088 1S   88   ILE  N      54  -0.470000       14.0070           0   0.00000     -0.301140E-02
    1089 1S   88   ILE  HN      1   0.310000       1.00800           0   0.00000     -0.301140E-02
    1090 1S   88   ILE  CA     22   0.700000E-01   12.0110           0   0.00000     -0.301140E-02
    1091 1S   88   ILE  HA      6   0.900000E-01   1.00800           0   0.00000     -0.301140E-02
    1092 1S   88   ILE  CB     22  -0.900000E-01   12.0110           0   0.00000     -0.301140E-02
    1093 1S   88   ILE  HB      3   0.900000E-01   1.00800           0   0.00000     -0.301140E-02
    1094 1S   88   ILE  CG2    24  -0.270000       12.0110           0   0.00000     -0.301140E-02
    1095 1S   88   ILE  HG21    3   0.900000E-01   1.00800           0   0.00000     -0.301140E-02
    1096 1S   88   ILE  HG22    3   0.900000E-01   1.00800           0   0.00000     -0.301140E-02
    1097 1S   88   ILE  HG23    3   0.900000E-01   1.00800           0   0.00000     -0.301140E-02
    1098 1S   88   ILE  CG1    23  -0.180000       12.0110           0   0.00000     -0.301140E-02
    1099 1S   88   ILE  HG11    3   0.900000E-01   1.00800           0   0.00000     -0.301140E-02
    1100 1S   88   ILE  HG12    3   0.900000E-01   1.00800           0   0.00000     -0.301140E-02
    1101 1S   88   ILE  CD     24  -0.270000       12.0110           0   0.00000     -0.301140E-02
    1102 1S   88   ILE  HD1     3   0.900000E-01   1.00800           0   0.00000     -0.301140E-02
    1103 1S   88   ILE  HD2     3   0.900000E-01   1.00800           0   0.00000     -0.301140E-02
    1104 1S   88   ILE  HD3     3   0.900000E-01   1.00800           0   0.00000     -0.301140E-02
    1105 1S   88   ILE  C      20   0.510000       12.0110           0   0.00000     -0.301140E-02
    1106 1S   88   ILE  O      70  -0.510000       15.9990           0   0.00000     -0.301140E-02
    1107 1S   89   GLN  N      54  -0.470000       14.0070           0   0.00000     -0.301140E-02
    1108 1S   89   GLN  HN      1   0.310000       1.00800           0   0.00000     -0.301140E-02
    1109 1S   89   GLN  CA     22   0.700000E-01   12.0110           0   0.00000     -0.301140E-02
    1110 1S   89   GLN  HA      6   0.900000E-01   1.00800           0   0.00000     -0.301140E-02
    1111 1S   89   GLN  CB     23  -0.180000       12.0110           0   0.00000     -0.301140E-02
    1112 1S   89   GLN  HB1     3   0.900000E-01   1.00800           0   0.00000     -0.301140E-02
    1113 1S   89   GLN  HB2     3   0.900000E-01   1.00800           0   0.00000     -0.301140E-02
    1114 1S   89   GLN  CG     23  -0.180000       12.0110           0   0.00000     -0.301140E-02
    1115 1S   89   GLN  HG1     3   0.900000E-01   1.00800           0   0.00000     -0.301140E-02
    1116 1S   89   GLN  HG2     3   0.900000E-01   1.00800           0   0.00000     -0.301140E-02
    1117 1S   89   GLN  CD     32   0.550000       12.0110           0   0.00000     -0.301140E-02
    1118 1S   89   GLN  OE1    70  -0.550000       15.9990           0   0.00000     -0.301140E-02
    1119 1S   89   GLN  NE2    55  -0.620000       14.0070           0   0.00000     -0.301140E-02
    1120 1S   89   GLN  HE21    1   0.320000       1.00800           0   0.00000     -0.301140E-02
    1121 1S   89   GLN  HE22    1   0.300000       1.00800           0   0.00000     -0.301140E-02
    1122 1S   89   GLN  C      20   0.510000       12.0110           0   0.00000     -0.301140E-02
    1123 1S   89   GLN  O      70  -0.510000       15.9990           0   0.00000     -0.301140E-02
    1124 1S   90   ASN  N      54  -0.470000       14.0070           0   0.00000     -0.301140E-02
    1125 1S   90   ASN  HN      1   0.310000       1.00800           0   0.00000     -0.301140E-02
    1126 1S   90   ASN  CA     22   0.700000E-01   12.0110           0   0.00000     -0.301140E-02
    1127 1S   90   ASN  HA      6   0.900000E-01   1.00800           0   0.00000     -0.301140E-02
    1128 1S   90   ASN  CB     23  -0.180000       12.0110           0   0.00000     -0.301140E-02
    1129 1S   90   ASN  HB1     3   0.900000E-01   1.00800           0   0.00000     -0.301140E-02
    1130 1S   90   ASN  HB2     3   0.900000E-01   1.00800           0   0.00000     -0.301140E-02
    1131 1S   90   ASN  CG     32   0.550000       12.0110           0   0.00000     -0.301140E-02
    1132 1S   90   ASN  OD1    70  -0.550000       15.9990           0   0.00000     -0.301140E-02
    1133 1S   90   ASN  ND2    55  -0.620000       14.0070           0   0.00000     -0.301140E-02
    1134 1S   90   ASN  HD21    1   0.320000       1.00800           0   0.00000     -0.301140E-02
    1135 1S   90   ASN  HD22    1   0.300000       1.00800           0   0.00000     -0.301140E-02
    1136 1S   90   ASN  C      20   0.510000       12.0110           0   0.00000     -0.301140E-02
    1137 1S   90   ASN  O      70  -0.510000       15.9990           0   0.00000     -0.301140E-02
    1138 1S   91   LEU  N      54  -0.470000       14.0070           0   0.00000     -0.301140E-02
    1139 1S   91   LEU  HN      1   0.310000       1.00800           0   0.00000     -0.301140E-02
    1140 1S   91   LEU  CA     22   0.700000E-01   12.0110           0   0.00000     -0.301140E-02
    1141 1S   91   LEU  HA      6   0.900000E-01   1.00800           0   0.00000     -0.301140E-02
    1142 1S   91   LEU  CB     23  -0.180000       12.0110           0   0.00000     -0.301140E-02
    1143 1S   91   LEU  HB1     3   0.900000E-01   1.00800           0   0.00000     -0.301140E-02
    1144 1S   91   LEU  HB2     3   0.900000E-01   1.00800           0   0.00000     -0.301140E-02
    1145 1S   91   LEU  CG     22  -0.900000E-01   12.0110           0   0.00000     -0.301140E-02
    1146 1S   91   LEU  HG      3   0.900000E-01   1.00800           0   0.00000     -0.301140E-02
    1147 1S   91   LEU  CD1    24  -0.270000       12.0110           0   0.00000     -0.301140E-02
    1148 1S   91   LEU  HD11    3   0.900000E-01   1.00800           0   0.00000     -0.301140E-02
    1149 1S   91   LEU  HD12    3   0.900000E-01   1.00800           0   0.00000     -0.301140E-02
    1150 1S   91   LEU  HD13    3   0.900000E-01   1.00800           0   0.00000     -0.301140E-02
    1151 1S   91   LEU  CD2    24  -0.270000       12.0110           0   0.00000     -0.301140E-02
    1152 1S   91   LEU  HD21    3   0.900000E-01   1.00800           0   0.00000     -0.301140E-02
    1153 1S   91   LEU  HD22    3   0.900000E-01   1.00800           0   0.00000     -0.301140E-02
    1154 1S   91   LEU  HD23    3   0.900000E-01   1.00800           0   0.00000     -0.301140E-02
    1155 1S   91   LEU  C      20   0.510000       12.0110           0   0.00000     -0.301140E-02
    1156 1S   91   LEU  O      70  -0.510000       15.9990           0   0.00000     -0.301140E-02
    1157 1S   92   THR  N      54  -0.470000       14.0070           0   0.00000     -0.301140E-02
    1158 1S   92   THR  HN      1   0.310000       1.00800           0   0.00000     -0.301140E-02
    1159 1S   92   THR  CA     22   0.700000E-01   12.0110           0   0.00000     -0.301140E-02
    1160 1S   92   THR  HA      6   0.900000E-01   1.00800           0   0.00000     -0.301140E-02
    1161 1S   92   THR  CB     22   0.140000       12.0110           0   0.00000     -0.301140E-02
    1162 1S   92   THR  HB      3   0.900000E-01   1.00800           0   0.00000     -0.301140E-02
    1163 1S   92   THR  OG1    73  -0.660000       15.9990           0   0.00000     -0.301140E-02
    1164 1S   92   THR  HG1     1   0.430000       1.00800           0   0.00000     -0.301140E-02
    1165 1S   92   THR  CG2    24  -0.270000       12.0110           0   0.00000     -0.301140E-02
    1166 1S   92   THR  HG21    3   0.900000E-01   1.00800           0   0.00000     -0.301140E-02
    1167 1S   92   THR  HG22    3   0.900000E-01   1.00800           0   0.00000     -0.301140E-02
    1168 1S   92   THR  HG23    3   0.900000E-01   1.00800           0   0.00000     -0.301140E-02
    1169 1S   92   THR  C      20   0.510000       12.0110           0   0.00000     -0.301140E-02
    1170 1S   92   THR  O      70  -0.510000       15.9990           0   0.00000     -0.301140E-02
    1171 1S   93   VAL  N      54  -0.470000       14.0070           0   0.00000     -0.301140E-02
    1172 1S   93   VAL  HN      1   0.310000       1.00800           0   0.00000     -0.301140E-02
    1173 1S   93   VAL  CA     22   0.700000E-01   12.0110           0   0.00000     -0.301140E-02
    1174 1S   93   VAL  HA      6   0.900000E-01   1.00800           0   0.00000     -0.301140E-02
    1175 1S   93   VAL  CB     22  -0.900000E-01   12.0110           0   0.00000     -0.301140E-02
    1176 1S   93   VAL  HB      3   0.900000E-01   1.00800           0   0.00000     -0.301140E-02
    1177 1S   93   VAL  CG1    24  -0.270000       12.0110           0   0.00000     -0.301140E-02
    1178 1S   93   VAL  HG11    3   0.900000E-01   1.00800           0   0.00000     -0.301140E-02
    1179 1S   93   VAL  HG12    3   0.900000E-01   1.00800           0   0.00000     -0.301140E-02
    1180 1S   93   VAL  HG13    3   0.900000E-01   1.00800           0   0.00000     -0.301140E-02
    1181 1S   93   VAL  CG2    24  -0.270000       12.0110           0   0.00000     -0.301140E-02
    1182 1S   93   VAL  HG21    3   0.900000E-01   1.00800           0   0.00000     -0.301140E-02
    1183 1S   93   VAL  HG22    3   0.900000E-01   1.00800           0   0.00000     -0.301140E-02
    1184 1S   93   VAL  HG23    3   0.900000E-01   1.00800           0   0.00000     -0.301140E-02
    1185 1S   93   VAL  C      20   0.510000       12.0110           0   0.00000     -0.301140E-02
    1186 1S   93   VAL  O      70  -0.510000       15.9990           0   0.00000     -0.301140E-02
    1187 1S   94   LYS  N      54  -0.470000       14.0070           0   0.00000     -0.301140E-02
    1188 1S   94   LYS  HN      1   0.310000       1.00800           0   0.00000     -0.301140E-02
    1189 1S   94   LYS  CA     22   0.700000E-01   12.0110           0   0.00000     -0.301140E-02
    1190 1S   94   LYS  HA      6   0.900000E-01   1.00800           0   0.00000     -0.301140E-02
    1191 1S   94   LYS  CB     23  -0.180000       12.0110           0   0.00000     -0.301140E-02
    1192 1S   94   LYS  HB1     3   0.900000E-01   1.00800           0   0.00000     -0.301140E-02
    1193 1S   94   LYS  HB2     3   0.900000E-01   1.00800           0   0.00000     -0.301140E-02
    1194 1S   94   LYS  CG     23  -0.180000       12.0110           0   0.00000     -0.301140E-02
    1195 1S   94   LYS  HG1     3   0.900000E-01   1.00800           0   0.00000     -0.301140E-02
    1196 1S   94   LYS  HG2     3   0.900000E-01   1.00800           0   0.00000     -0.301140E-02
    1197 1S   94   LYS  CD     23  -0.180000       12.0110           0   0.00000     -0.301140E-02
    1198 1S   94   LYS  HD1     3   0.900000E-01   1.00800           0   0.00000     -0.301140E-02
    1199 1S   94   LYS  HD2     3   0.900000E-01   1.00800           0   0.00000     -0.301140E-02
    1200 1S   94   LYS  CE     23   0.210000       12.0110           0   0.00000     -0.301140E-02
    1201 1S   94   LYS  HE1     3   0.500000E-01   1.00800           0   0.00000     -0.301140E-02
    1202 1S   94   LYS  HE2     3   0.500000E-01   1.00800           0   0.00000     -0.301140E-02
    1203 1S   94   LYS  NZ     56  -0.300000       14.0070           0   0.00000     -0.301140E-02
    1204 1S   94   LYS  HZ1     2   0.330000       1.00800           0   0.00000     -0.301140E-02
    1205 1S   94   LYS  HZ2     2   0.330000       1.00800           0   0.00000     -0.301140E-02
    1206 1S   94   LYS  HZ3     2   0.330000       1.00800           0   0.00000     -0.301140E-02
    1207 1S   94   LYS  C      20   0.510000       12.0110           0   0.00000     -0.301140E-02
    1208 1S   94   LYS  O      70  -0.510000       15.9990           0   0.00000     -0.301140E-02
    1209 1S   95   LEU  N      54  -0.470000       14.0070           0   0.00000     -0.301140E-02
    1210 1S   95   LEU  HN      1   0.310000       1.00800           0   0.00000     -0.301140E-02
    1211 1S   95   LEU  CA     22   0.700000E-01   12.0110           0   0.00000     -0.301140E-02
    1212 1S   95   LEU  HA      6   0.900000E-01   1.00800           0   0.00000     -0.301140E-02
    1213 1S   95   LEU  CB     23  -0.180000       12.0110           0   0.00000     -0.301140E-02
    1214 1S   95   LEU  HB1     3   0.900000E-01   1.00800           0   0.00000     -0.301140E-02
    1215 1S   95   LEU  HB2     3   0.900000E-01   1.00800           0   0.00000     -0.301140E-02
    1216 1S   95   LEU  CG     22  -0.900000E-01   12.0110           0   0.00000     -0.301140E-02
    1217 1S   95   LEU  HG      3   0.900000E-01   1.00800           0   0.00000     -0.301140E-02
    1218 1S   95   LEU  CD1    24  -0.270000       12.0110           0   0.00000     -0.301140E-02
    1219 1S   95   LEU  HD11    3   0.900000E-01   1.00800           0   0.00000     -0.301140E-02
    1220 1S   95   LEU  HD12    3   0.900000E-01   1.00800           0   0.00000     -0.301140E-02
    1221 1S   95   LEU  HD13    3   0.900000E-01   1.00800           0   0.00000     -0.301140E-02
    1222 1S   95   LEU  CD2    24  -0.270000       12.0110           0   0.00000     -0.301140E-02
    1223 1S   95   LEU  HD21    3   0.900000E-01   1.00800           0   0.00000     -0.301140E-02
    1224 1S   95   LEU  HD22    3   0.900000E-01   1.00800           0   0.00000     -0.301140E-02
    1225 1S   95   LEU  HD23    3   0.900000E-01   1.00800           0   0.00000     -0.301140E-02
    1226 1S   95   LEU  C      20   0.510000       12.0110           0   0.00000     -0.301140E-02
    1227 1S   95   LEU  O      70  -0.510000       15.9990           0   0.00000     -0.301140E-02
    1228 1S   96   GLN  N      54  -0.470000       14.0070           0   0.00000     -0.301140E-02
    1229 1S   96   GLN  HN      1   0.310000       1.00800           0   0.00000     -0.301140E-02
    1230 1S   96   GLN  CA     22   0.700000E-01   12.0110           0   0.00000     -0.301140E-02
    1231 1S   96   GLN  HA      6   0.900000E-01   1.00800           0   0.00000     -0.301140E-02
    1232 1S   96   GLN  CB     23  -0.180000       12.0110           0   0.00000     -0.301140E-02
    1233 1S   96   GLN  HB1     3   0.900000E-01   1.00800           0   0.00000     -0.301140E-02
    1234 1S   96   GLN  HB2     3   0.900000E-01   1.00800           0   0.00000     -0.301140E-02
    1235 1S   96   GLN  CG     23  -0.180000       12.0110           0   0.00000     -0.301140E-02
    1236 1S   96   GLN  HG1     3   0.900000E-01   1.00800           0   0.00000     -0.301140E-02
    1237 1S   96   GLN  HG2     3   0.900000E-01   1.00800           0   0.00000     -0.301140E-02
    1238 1S   96   GLN  CD     32   0.550000       12.0110           0   0.00000     -0.301140E-02
    1239 1S   96   GLN  OE1    70  -0.550000       15.9990           0   0.00000     -0.301140E-02
    1240 1S   96   GLN  NE2    55  -0.620000       14.0070           0   0.00000     -0.301140E-02
    1241 1S   96   GLN  HE21    1   0.320000       1.00800           0   0.00000     -0.301140E-02
    1242 1S   96   GLN  HE22    1   0.300000       1.00800           0   0.00000     -0.301140E-02
    1243 1S   96   GLN  C      20   0.510000       12.0110           0   0.00000     -0.301140E-02
    1244 1S   96   GLN  O      70  -0.510000       15.9990           0   0.00000     -0.301140E-02
    1245 1S   97   LEU  N      54  -0.470000       14.0070           0   0.00000     -0.301140E-02
    1246 1S   97   LEU  HN      1   0.310000       1.00800           0   0.00000     -0.301140E-02
    1247 1S   97   LEU  CA     22   0.700000E-01   12.0110           0   0.00000     -0.301140E-02
    1248 1S   97   LEU  HA      6   0.900000E-01   1.00800           0   0.00000     -0.301140E-02
    1249 1S   97   LEU  CB     23  -0.180000       12.0110           0   0.00000     -0.301140E-02
    1250 1S   97   LEU  HB1     3   0.900000E-01   1.00800           0   0.00000     -0.301140E-02
    1251 1S   97   LEU  HB2     3   0.900000E-01   1.00800           0   0.00000     -0.301140E-02
    1252 1S   97   LEU  CG     22  -0.900000E-01   12.0110           0   0.00000     -0.301140E-02
    1253 1S   97   LEU  HG      3   0.900000E-01   1.00800           0   0.00000     -0.301140E-02
    1254 1S   97   LEU  CD1    24  -0.270000       12.0110           0   0.00000     -0.301140E-02
    1255 1S   97   LEU  HD11    3   0.900000E-01   1.00800           0   0.00000     -0.301140E-02
    1256 1S   97   LEU  HD12    3   0.900000E-01   1.00800           0   0.00000     -0.301140E-02
    1257 1S   97   LEU  HD13    3   0.900000E-01   1.00800           0   0.00000     -0.301140E-02
    1258 1S   97   LEU  CD2    24  -0.270000       12.0110           0   0.00000     -0.301140E-02
    1259 1S   97   LEU  HD21    3   0.900000E-01   1.00800           0   0.00000     -0.301140E-02
    1260 1S   97   LEU  HD22    3   0.900000E-01   1.00800           0   0.00000     -0.301140E-02
    1261 1S   97   LEU  HD23    3   0.900000E-01   1.00800           0   0.00000     -0.301140E-02
    1262 1S   97   LEU  C      20   0.510000       12.0110           0   0.00000     -0.301140E-02
    1263 1S   97   LEU  O      70  -0.510000       15.9990           0   0.00000     -0.301140E-02
    1264 1S   98   GLN  N      54  -0.470000       14.0070           0   0.00000     -0.301140E-02
    1265 1S   98   GLN  HN      1   0.310000       1.00800           0   0.00000     -0.301140E-02
    1266 1S   98   GLN  CA     22   0.700000E-01   12.0110           0   0.00000     -0.301140E-02
    1267 1S   98   GLN  HA      6   0.900000E-01   1.00800           0   0.00000     -0.301140E-02
    1268 1S   98   GLN  CB     23  -0.180000       12.0110           0   0.00000     -0.301140E-02
    1269 1S   98   GLN  HB1     3   0.900000E-01   1.00800           0   0.00000     -0.301140E-02
    1270 1S   98   GLN  HB2     3   0.900000E-01   1.00800           0   0.00000     -0.301140E-02
    1271 1S   98   GLN  CG     23  -0.180000       12.0110           0   0.00000     -0.301140E-02
    1272 1S   98   GLN  HG1     3   0.900000E-01   1.00800           0   0.00000     -0.301140E-02
    1273 1S   98   GLN  HG2     3   0.900000E-01   1.00800           0   0.00000     -0.301140E-02
    1274 1S   98   GLN  CD     32   0.550000       12.0110           0   0.00000     -0.301140E-02
    1275 1S   98   GLN  OE1    70  -0.550000       15.9990           0   0.00000     -0.301140E-02
    1276 1S   98   GLN  NE2    55  -0.620000       14.0070           0   0.00000     -0.301140E-02
    1277 1S   98   GLN  HE21    1   0.320000       1.00800           0   0.00000     -0.301140E-02
    1278 1S   98   GLN  HE22    1   0.300000       1.00800           0   0.00000     -0.301140E-02
    1279 1S   98   GLN  C      20   0.510000       12.0110           0   0.00000     -0.301140E-02
    1280 1S   98   GLN  O      70  -0.510000       15.9990           0   0.00000     -0.301140E-02
    1281 1S   99   ALA  N      54  -0.470000       14.0070           0   0.00000     -0.301140E-02
    1282 1S   99   ALA  HN      1   0.310000       1.00800           0   0.00000     -0.301140E-02
    1283 1S   99   ALA  CA     22   0.700000E-01   12.0110           0   0.00000     -0.301140E-02
    1284 1S   99   ALA  HA      6   0.900000E-01   1.00800           0   0.00000     -0.301140E-02
    1285 1S   99   ALA  CB     24  -0.270000       12.0110           0   0.00000     -0.301140E-02
    1286 1S   99   ALA  HB1     3   0.900000E-01   1.00800           0   0.00000     -0.301140E-02
    1287 1S   99   ALA  HB2     3   0.900000E-01   1.00800           0   0.00000     -0.301140E-02
    1288 1S   99   ALA  HB3     3   0.900000E-01   1.00800           0   0.00000     -0.301140E-02
    1289 1S   99   ALA  C      20   0.510000       12.0110           0   0.00000     -0.301140E-02
    1290 1S   99   ALA  O      70  -0.510000       15.9990           0   0.00000     -0.301140E-02
    1291 1S   100  LEU  N      54  -0.470000       14.0070           0   0.00000     -0.301140E-02
    1292 1S   100  LEU  HN      1   0.310000       1.00800           0   0.00000     -0.301140E-02
    1293 1S   100  LEU  CA     22   0.700000E-01   12.0110           0   0.00000     -0.301140E-02
    1294 1S   100  LEU  HA      6   0.900000E-01   1.00800           0   0.00000     -0.301140E-02
    1295 1S   100  LEU  CB     23  -0.180000       12.0110           0   0.00000     -0.301140E-02
    1296 1S   100  LEU  HB1     3   0.900000E-01   1.00800           0   0.00000     -0.301140E-02
    1297 1S   100  LEU  HB2     3   0.900000E-01   1.00800           0   0.00000     -0.301140E-02
    1298 1S   100  LEU  CG     22  -0.900000E-01   12.0110           0   0.00000     -0.301140E-02
    1299 1S   100  LEU  HG      3   0.900000E-01   1.00800           0   0.00000     -0.301140E-02
    1300 1S   100  LEU  CD1    24  -0.270000       12.0110           0   0.00000     -0.301140E-02
    1301 1S   100  LEU  HD11    3   0.900000E-01   1.00800           0   0.00000     -0.301140E-02
    1302 1S   100  LEU  HD12    3   0.900000E-01   1.00800           0   0.00000     -0.301140E-02
    1303 1S   100  LEU  HD13    3   0.900000E-01   1.00800           0   0.00000     -0.301140E-02
    1304 1S   100  LEU  CD2    24  -0.270000       12.0110           0   0.00000     -0.301140E-02
    1305 1S   100  LEU  HD21    3   0.900000E-01   1.00800           0   0.00000     -0.301140E-02
    1306 1S   100  LEU  HD22    3   0.900000E-01   1.00800           0   0.00000     -0.301140E-02
    1307 1S   100  LEU  HD23    3   0.900000E-01   1.00800           0   0.00000     -0.301140E-02
    1308 1S   100  LEU  C      20   0.510000       12.0110           0   0.00000     -0.301140E-02
    1309 1S   100  LEU  O      70  -0.510000       15.9990           0   0.00000     -0.301140E-02
    1310 1S   101  GLN  N      54  -0.470000       14.0070           0   0.00000     -0.301140E-02
    1311 1S   101  GLN  HN      1   0.310000       1.00800           0   0.00000     -0.301140E-02
    1312 1S   101  GLN  CA     22   0.700000E-01   12.0110           0   0.00000     -0.301140E-02
    1313 1S   101  GLN  HA      6   0.900000E-01   1.00800           0   0.00000     -0.301140E-02
    1314 1S   101  GLN  CB     23  -0.180000       12.0110           0   0.00000     -0.301140E-02
    1315 1S   101  GLN  HB1     3   0.900000E-01   1.00800           0   0.00000     -0.301140E-02
    1316 1S   101  GLN  HB2     3   0.900000E-01   1.00800           0   0.00000     -0.301140E-02
    1317 1S   101  GLN  CG     23  -0.180000       12.0110           0   0.00000     -0.301140E-02
    1318 1S   101  GLN  HG1     3   0.900000E-01   1.00800           0   0.00000     -0.301140E-02
    1319 1S   101  GLN  HG2     3   0.900000E-01   1.00800           0   0.00000     -0.301140E-02
    1320 1S   101  GLN  CD     32   0.550000       12.0110           0   0.00000     -0.301140E-02
    1321 1S   101  GLN  OE1    70  -0.550000       15.9990           0   0.00000     -0.301140E-02
    1322 1S   101  GLN  NE2    55  -0.620000       14.0070           0   0.00000     -0.301140E-02
    1323 1S   101  GLN  HE21    1   0.320000       1.00800           0   0.00000     -0.301140E-02
    1324 1S   101  GLN  HE22    1   0.300000       1.00800           0   0.00000     -0.301140E-02
    1325 1S   101  GLN  C      20   0.510000       12.0110           0   0.00000     -0.301140E-02
    1326 1S   101  GLN  O      70  -0.510000       15.9990           0   0.00000     -0.301140E-02
    1327 1S   102  GLN  N      54  -0.470000       14.0070           0   0.00000     -0.301140E-02
    1328 1S   102  GLN  HN      1   0.310000       1.00800           0   0.00000     -0.301140E-02
    1329 1S   102  GLN  CA     22   0.700000E-01   12.0110           0   0.00000     -0.301140E-02
    1330 1S   102  GLN  HA      6   0.900000E-01   1.00800           0   0.00000     -0.301140E-02
    1331 1S   102  GLN  CB     23  -0.180000       12.0110           0   0.00000     -0.301140E-02
    1332 1S   102  GLN  HB1     3   0.900000E-01   1.00800           0   0.00000     -0.301140E-02
    1333 1S   102  GLN  HB2     3   0.900000E-01   1.00800           0   0.00000     -0.301140E-02
    1334 1S   102  GLN  CG     23  -0.180000       12.0110           0   0.00000     -0.301140E-02
    1335 1S   102  GLN  HG1     3   0.900000E-01   1.00800           0   0.00000     -0.301140E-02
    1336 1S   102  GLN  HG2     3   0.900000E-01   1.00800           0   0.00000     -0.301140E-02
    1337 1S   102  GLN  CD     32   0.550000       12.0110           0   0.00000     -0.301140E-02
    1338 1S   102  GLN  OE1    70  -0.550000       15.9990           0   0.00000     -0.301140E-02
    1339 1S   102  GLN  NE2    55  -0.620000       14.0070           0   0.00000     -0.301140E-02
    1340 1S   102  GLN  HE21    1   0.320000       1.00800           0   0.00000     -0.301140E-02
    1341 1S   102  GLN  HE22    1   0.300000       1.00800           0   0.00000     -0.301140E-02
    1342 1S   102  GLN  C      20   0.510000       12.0110           0   0.00000     -0.301140E-02
    1343 1S   102  GLN  O      70  -0.510000       15.9990           0   0.00000     -0.301140E-02
    1344 1S   103  ASN  N      54  -0.470000       14.0070           0   0.00000     -0.301140E-02
    1345 1S   103  ASN  HN      1   0.310000       1.00800           0   0.00000     -0.301140E-02
    1346 1S   103  ASN  CA     22   0.700000E-01   12.0110           0   0.00000     -0.301140E-02
    1347 1S   103  ASN  HA      6   0.900000E-01   1.00800           0   0.00000     -0.301140E-02
    1348 1S   103  ASN  CB     23  -0.180000       12.0110           0   0.00000     -0.301140E-02
    1349 1S   103  ASN  HB1     3   0.900000E-01   1.00800           0   0.00000     -0.301140E-02
    1350 1S   103  ASN  HB2     3   0.900000E-01   1.00800           0   0.00000     -0.301140E-02
    1351 1S   103  ASN  CG     32   0.550000       12.0110           0   0.00000     -0.301140E-02
    1352 1S   103  ASN  OD1    70  -0.550000       15.9990           0   0.00000     -0.301140E-02
    1353 1S   103  ASN  ND2    55  -0.620000       14.0070           0   0.00000     -0.301140E-02
    1354 1S   103  ASN  HD21    1   0.320000       1.00800           0   0.00000     -0.301140E-02
    1355 1S   103  ASN  HD22    1   0.300000       1.00800           0   0.00000     -0.301140E-02
    1356 1S   103  ASN  C      20   0.510000       12.0110           0   0.00000     -0.301140E-02
    1357 1S   103  ASN  O      70  -0.510000       15.9990           0   0.00000     -0.301140E-02
    1358 1S   104  GLY  N      54  -0.470000       14.0070           0   0.00000     -0.301140E-02
    1359 1S   104  GLY  HN      1   0.310000       1.00800           0   0.00000     -0.301140E-02
    1360 1S   104  GLY  CA     23  -0.200000E-01   12.0110           0   0.00000     -0.301140E-02
    1361 1S   104  GLY  HA1     6   0.900000E-01   1.00800           0   0.00000     -0.301140E-02
    1362 1S   104  GLY  HA2     6   0.900000E-01   1.00800           0   0.00000     -0.301140E-02
    1363 1S   104  GLY  C      20   0.510000       12.0110           0   0.00000     -0.301140E-02
    1364 1S   104  GLY  O      70  -0.510000       15.9990           0   0.00000     -0.301140E-02
    1365 1S   105  SER  N      54  -0.470000       14.0070           0   0.00000     -0.301140E-02
    1366 1S   105  SER  HN      1   0.310000       1.00800           0   0.00000     -0.301140E-02
    1367 1S   105  SER  CA     22   0.700000E-01   12.0110           0   0.00000     -0.301140E-02
    1368 1S   105  SER  HA      6   0.900000E-01   1.00800           0   0.00000     -0.301140E-02
    1369 1S   105  SER  CB     23   0.500000E-01   12.0110           0   0.00000     -0.301140E-02
    1370 1S   105  SER  HB1     3   0.900000E-01   1.00800           0   0.00000     -0.301140E-02
    1371 1S   105  SER  HB2     3   0.900000E-01   1.00800           0   0.00000     -0.301140E-02
    1372 1S   105  SER  OG     73  -0.660000       15.9990           0   0.00000     -0.301140E-02
    1373 1S   105  SER  HG1     1   0.430000       1.00800           0   0.00000     -0.301140E-02
    1374 1S   105  SER  C      20   0.510000       12.0110           0   0.00000     -0.301140E-02
    1375 1S   105  SER  O      70  -0.510000       15.9990           0   0.00000     -0.301140E-02
    1376 1S   106  SER  N      54  -0.470000       14.0070           0   0.00000     -0.301140E-02
    1377 1S   106  SER  HN      1   0.310000       1.00800           0   0.00000     -0.301140E-02
    1378 1S   106  SER  CA     22   0.700000E-01   12.0110           0   0.00000     -0.301140E-02
    1379 1S   106  SER  HA      6   0.900000E-01   1.00800           0   0.00000     -0.301140E-02
    1380 1S   106  SER  CB     23   0.500000E-01   12.0110           0   0.00000     -0.301140E-02
    1381 1S   106  SER  HB1     3   0.900000E-01   1.00800           0   0.00000     -0.301140E-02
    1382 1S   106  SER  HB2     3   0.900000E-01   1.00800           0   0.00000     -0.301140E-02
    1383 1S   106  SER  OG     73  -0.660000       15.9990           0   0.00000     -0.301140E-02
    1384 1S   106  SER  HG1     1   0.430000       1.00800           0   0.00000     -0.301140E-02
    1385 1S   106  SER  C      20   0.510000       12.0110           0   0.00000     -0.301140E-02
    1386 1S   106  SER  O      70  -0.510000       15.9990           0   0.00000     -0.301140E-02
    1387 1S   107  VAL  N      54  -0.470000       14.0070           0   0.00000     -0.301140E-02
    1388 1S   107  VAL  HN      1   0.310000       1.00800           0   0.00000     -0.301140E-02
    1389 1S   107  VAL  CA     22   0.700000E-01   12.0110           0   0.00000     -0.301140E-02
    1390 1S   107  VAL  HA      6   0.900000E-01   1.00800           0   0.00000     -0.301140E-02
    1391 1S   107  VAL  CB     22  -0.900000E-01   12.0110           0   0.00000     -0.301140E-02
    1392 1S   107  VAL  HB      3   0.900000E-01   1.00800           0   0.00000     -0.301140E-02
    1393 1S   107  VAL  CG1    24  -0.270000       12.0110           0   0.00000     -0.301140E-02
    1394 1S   107  VAL  HG11    3   0.900000E-01   1.00800           0   0.00000     -0.301140E-02
    1395 1S   107  VAL  HG12    3   0.900000E-01   1.00800           0   0.00000     -0.301140E-02
    1396 1S   107  VAL  HG13    3   0.900000E-01   1.00800           0   0.00000     -0.301140E-02
    1397 1S   107  VAL  CG2    24  -0.270000       12.0110           0   0.00000     -0.301140E-02
    1398 1S   107  VAL  HG21    3   0.900000E-01   1.00800           0   0.00000     -0.301140E-02
    1399 1S   107  VAL  HG22    3   0.900000E-01   1.00800           0   0.00000     -0.301140E-02
    1400 1S   107  VAL  HG23    3   0.900000E-01   1.00800           0   0.00000     -0.301140E-02
    1401 1S   107  VAL  C      20   0.510000       12.0110           0   0.00000     -0.301140E-02
    1402 1S   107  VAL  O      70  -0.510000       15.9990           0   0.00000     -0.301140E-02
    1403 1S   108  LEU  N      54  -0.470000       14.0070           0   0.00000     -0.301140E-02
    1404 1S   108  LEU  HN      1   0.310000       1.00800           0   0.00000     -0.301140E-02
    1405 1S   108  LEU  CA     22   0.700000E-01   12.0110           0   0.00000     -0.301140E-02
    1406 1S   108  LEU  HA      6   0.900000E-01   1.00800           0   0.00000     -0.301140E-02
    1407 1S   108  LEU  CB     23  -0.180000       12.0110           0   0.00000     -0.301140E-02
    1408 1S   108  LEU  HB1     3   0.900000E-01   1.00800           0   0.00000     -0.301140E-02
    1409 1S   108  LEU  HB2     3   0.900000E-01   1.00800           0   0.00000     -0.301140E-02
    1410 1S   108  LEU  CG     22  -0.900000E-01   12.0110           0   0.00000     -0.301140E-02
    1411 1S   108  LEU  HG      3   0.900000E-01   1.00800           0   0.00000     -0.301140E-02
    1412 1S   108  LEU  CD1    24  -0.270000       12.0110           0   0.00000     -0.301140E-02
    1413 1S   108  LEU  HD11    3   0.900000E-01   1.00800           0   0.00000     -0.301140E-02
    1414 1S   108  LEU  HD12    3   0.900000E-01   1.00800           0   0.00000     -0.301140E-02
    1415 1S   108  LEU  HD13    3   0.900000E-01   1.00800           0   0.00000     -0.301140E-02
    1416 1S   108  LEU  CD2    24  -0.270000       12.0110           0   0.00000     -0.301140E-02
    1417 1S   108  LEU  HD21    3   0.900000E-01   1.00800           0   0.00000     -0.301140E-02
    1418 1S   108  LEU  HD22    3   0.900000E-01   1.00800           0   0.00000     -0.301140E-02
    1419 1S   108  LEU  HD23    3   0.900000E-01   1.00800           0   0.00000     -0.301140E-02
    1420 1S   108  LEU  C      20   0.510000       12.0110           0   0.00000     -0.301140E-02
    1421 1S   108  LEU  O      70  -0.510000       15.9990           0   0.00000     -0.301140E-02
    1422 1S   109  SER  N      54  -0.470000       14.0070           0   0.00000     -0.301140E-02
    1423 1S   109  SER  HN      1   0.310000       1.00800           0   0.00000     -0.301140E-02
    1424 1S   109  SER  CA     22   0.700000E-01   12.0110           0   0.00000     -0.301140E-02
    1425 1S   109  SER  HA      6   0.900000E-01   1.00800           0   0.00000     -0.301140E-02
    1426 1S   109  SER  CB     23   0.500000E-01   12.0110           0   0.00000     -0.301140E-02
    1427 1S   109  SER  HB1     3   0.900000E-01   1.00800           0   0.00000     -0.301140E-02
    1428 1S   109  SER  HB2     3   0.900000E-01   1.00800           0   0.00000     -0.301140E-02
    1429 1S   109  SER  OG     73  -0.660000       15.9990           0   0.00000     -0.301140E-02
    1430 1S   109  SER  HG1     1   0.430000       1.00800           0   0.00000     -0.301140E-02
    1431 1S   109  SER  C      20   0.510000       12.0110           0   0.00000     -0.301140E-02
    1432 1S   109  SER  O      70  -0.510000       15.9990           0   0.00000     -0.301140E-02
    1433 1S   110  GLU  N      54  -0.470000       14.0070           0   0.00000     -0.301140E-02
    1434 1S   110  GLU  HN      1   0.310000       1.00800           0   0.00000     -0.301140E-02
    1435 1S   110  GLU  CA     22   0.700000E-01   12.0110           0   0.00000     -0.301140E-02
    1436 1S   110  GLU  HA      6   0.900000E-01   1.00800           0   0.00000     -0.301140E-02
    1437 1S   110  GLU  CB     23  -0.180000       12.0110           0   0.00000     -0.301140E-02
    1438 1S   110  GLU  HB1     3   0.900000E-01   1.00800           0   0.00000     -0.301140E-02
    1439 1S   110  GLU  HB2     3   0.900000E-01   1.00800           0   0.00000     -0.301140E-02
    1440 1S   110  GLU  CG     23  -0.280000       12.0110           0   0.00000     -0.301140E-02
    1441 1S   110  GLU  HG1     3   0.900000E-01   1.00800           0   0.00000     -0.301140E-02
    1442 1S   110  GLU  HG2     3   0.900000E-01   1.00800           0   0.00000     -0.301140E-02
    1443 1S   110  GLU  CD     32   0.620000       12.0110           0   0.00000     -0.301140E-02
    1444 1S   110  GLU  OE1    72  -0.760000       15.9990           0   0.00000     -0.301140E-02
    1445 1S   110  GLU  OE2    72  -0.760000       15.9990           0   0.00000     -0.301140E-02
    1446 1S   110  GLU  C      20   0.510000       12.0110           0   0.00000     -0.301140E-02
    1447 1S   110  GLU  O      70  -0.510000       15.9990           0   0.00000     -0.301140E-02
    1448 1S   111  ASP  N      54  -0.470000       14.0070           0   0.00000     -0.301140E-02
    1449 1S   111  ASP  HN      1   0.310000       1.00800           0   0.00000     -0.301140E-02
    1450 1S   111  ASP  CA     22   0.700000E-01   12.0110           0   0.00000     -0.301140E-02
    1451 1S   111  ASP  HA      6   0.900000E-01   1.00800           0   0.00000     -0.301140E-02
    1452 1S   111  ASP  CB     23  -0.280000       12.0110           0   0.00000     -0.301140E-02
    1453 1S   111  ASP  HB1     3   0.900000E-01   1.00800           0   0.00000     -0.301140E-02
    1454 1S   111  ASP  HB2     3   0.900000E-01   1.00800           0   0.00000     -0.301140E-02
    1455 1S   111  ASP  CG     32   0.620000       12.0110           0   0.00000     -0.301140E-02
    1456 1S   111  ASP  OD1    72  -0.760000       15.9990           0   0.00000     -0.301140E-02
    1457 1S   111  ASP  OD2    72  -0.760000       15.9990           0   0.00000     -0.301140E-02
    1458 1S   111  ASP  C      20   0.510000       12.0110           0   0.00000     -0.301140E-02
    1459 1S   111  ASP  O      70  -0.510000       15.9990           0   0.00000     -0.301140E-02
    1460 1S   112  LYS  N      54  -0.470000       14.0070           0   0.00000     -0.301140E-02
    1461 1S   112  LYS  HN      1   0.310000       1.00800           0   0.00000     -0.301140E-02
    1462 1S   112  LYS  CA     22   0.700000E-01   12.0110           0   0.00000     -0.301140E-02
    1463 1S   112  LYS  HA      6   0.900000E-01   1.00800           0   0.00000     -0.301140E-02
    1464 1S   112  LYS  CB     23  -0.180000       12.0110           0   0.00000     -0.301140E-02
    1465 1S   112  LYS  HB1     3   0.900000E-01   1.00800           0   0.00000     -0.301140E-02
    1466 1S   112  LYS  HB2     3   0.900000E-01   1.00800           0   0.00000     -0.301140E-02
    1467 1S   112  LYS  CG     23  -0.180000       12.0110           0   0.00000     -0.301140E-02
    1468 1S   112  LYS  HG1     3   0.900000E-01   1.00800           0   0.00000     -0.301140E-02
    1469 1S   112  LYS  HG2     3   0.900000E-01   1.00800           0   0.00000     -0.301140E-02
    1470 1S   112  LYS  CD     23  -0.180000       12.0110           0   0.00000     -0.301140E-02
    1471 1S   112  LYS  HD1     3   0.900000E-01   1.00800           0   0.00000     -0.301140E-02
    1472 1S   112  LYS  HD2     3   0.900000E-01   1.00800           0   0.00000     -0.301140E-02
    1473 1S   112  LYS  CE     23   0.210000       12.0110           0   0.00000     -0.301140E-02
    1474 1S   112  LYS  HE1     3   0.500000E-01   1.00800           0   0.00000     -0.301140E-02
    1475 1S   112  LYS  HE2     3   0.500000E-01   1.00800           0   0.00000     -0.301140E-02
    1476 1S   112  LYS  NZ     56  -0.300000       14.0070           0   0.00000     -0.301140E-02
    1477 1S   112  LYS  HZ1     2   0.330000       1.00800           0   0.00000     -0.301140E-02
    1478 1S   112  LYS  HZ2     2   0.330000       1.00800           0   0.00000     -0.301140E-02
    1479 1S   112  LYS  HZ3     2   0.330000       1.00800           0   0.00000     -0.301140E-02
    1480 1S   112  LYS  C      20   0.510000       12.0110           0   0.00000     -0.301140E-02
    1481 1S   112  LYS  O      70  -0.510000       15.9990           0   0.00000     -0.301140E-02
    1482 1S   113  SER  N      54  -0.470000       14.0070           0   0.00000     -0.301140E-02
    1483 1S   113  SER  HN      1   0.310000       1.00800           0   0.00000     -0.301140E-02
    1484 1S   113  SER  CA     22   0.700000E-01   12.0110           0   0.00000     -0.301140E-02
    1485 1S   113  SER  HA      6   0.900000E-01   1.00800           0   0.00000     -0.301140E-02
    1486 1S   113  SER  CB     23   0.500000E-01   12.0110           0   0.00000     -0.301140E-02
    1487 1S   113  SER  HB1     3   0.900000E-01   1.00800           0   0.00000     -0.301140E-02
    1488 1S   113  SER  HB2     3   0.900000E-01   1.00800           0   0.00000     -0.301140E-02
    1489 1S   113  SER  OG     73  -0.660000       15.9990           0   0.00000     -0.301140E-02
    1490 1S   113  SER  HG1     1   0.430000       1.00800           0   0.00000     -0.301140E-02
    1491 1S   113  SER  C      20   0.510000       12.0110           0   0.00000     -0.301140E-02
    1492 1S   113  SER  O      70  -0.510000       15.9990           0   0.00000     -0.301140E-02
    1493 1S   114  LYS  N      54  -0.470000       14.0070           0   0.00000     -0.301140E-02
    1494 1S   114  LYS  HN      1   0.310000       1.00800           0   0.00000     -0.301140E-02
    1495 1S   114  LYS  CA     22   0.700000E-01   12.0110           0   0.00000     -0.301140E-02
    1496 1S   114  LYS  HA      6   0.900000E-01   1.00800           0   0.00000     -0.301140E-02
    1497 1S   114  LYS  CB     23  -0.180000       12.0110           0   0.00000     -0.301140E-02
    1498 1S   114  LYS  HB1     3   0.900000E-01   1.00800           0   0.00000     -0.301140E-02
    1499 1S   114  LYS  HB2     3   0.900000E-01   1.00800           0   0.00000     -0.301140E-02
    1500 1S   114  LYS  CG     23  -0.180000       12.0110           0   0.00000     -0.301140E-02
    1501 1S   114  LYS  HG1     3   0.900000E-01   1.00800           0   0.00000     -0.301140E-02
    1502 1S   114  LYS  HG2     3   0.900000E-01   1.00800           0   0.00000     -0.301140E-02
    1503 1S   114  LYS  CD     23  -0.180000       12.0110           0   0.00000     -0.301140E-02
    1504 1S   114  LYS  HD1     3   0.900000E-01   1.00800           0   0.00000     -0.301140E-02
    1505 1S   114  LYS  HD2     3   0.900000E-01   1.00800           0   0.00000     -0.301140E-02
    1506 1S   114  LYS  CE     23   0.210000       12.0110           0   0.00000     -0.301140E-02
    1507 1S   114  LYS  HE1     3   0.500000E-01   1.00800           0   0.00000     -0.301140E-02
    1508 1S   114  LYS  HE2     3   0.500000E-01   1.00800           0   0.00000     -0.301140E-02
    1509 1S   114  LYS  NZ     56  -0.300000       14.0070           0   0.00000     -0.301140E-02
    1510 1S   114  LYS  HZ1     2   0.330000       1.00800           0   0.00000     -0.301140E-02
    1511 1S   114  LYS  HZ2     2   0.330000       1.00800           0   0.00000     -0.301140E-02
    1512 1S   114  LYS  HZ3     2   0.330000       1.00800           0   0.00000     -0.301140E-02
    1513 1S   114  LYS  C      20   0.510000       12.0110           0   0.00000     -0.301140E-02
    1514 1S   114  LYS  O      70  -0.510000       15.9990           0   0.00000     -0.301140E-02
    1515 1S   115  ARG  N      54  -0.470000       14.0070           0   0.00000     -0.301140E-02
    1516 1S   115  ARG  HN      1   0.310000       1.00800           0   0.00000     -0.301140E-02
    1517 1S   115  ARG  CA     22   0.700000E-01   12.0110           0   0.00000     -0.301140E-02
    1518 1S   115  ARG  HA      6   0.900000E-01   1.00800           0   0.00000     -0.301140E-02
    1519 1S   115  ARG  CB     23  -0.180000       12.0110           0   0.00000     -0.301140E-02
    1520 1S   115  ARG  HB1     3   0.900000E-01   1.00800           0   0.00000     -0.301140E-02
    1521 1S   115  ARG  HB2     3   0.900000E-01   1.00800           0   0.00000     -0.301140E-02
    1522 1S   115  ARG  CG     23  -0.180000       12.0110           0   0.00000     -0.301140E-02
    1523 1S   115  ARG  HG1     3   0.900000E-01   1.00800           0   0.00000     -0.301140E-02
    1524 1S   115  ARG  HG2     3   0.900000E-01   1.00800           0   0.00000     -0.301140E-02
    1525 1S   115  ARG  CD     23   0.200000       12.0110           0   0.00000     -0.301140E-02
    1526 1S   115  ARG  HD1     3   0.900000E-01   1.00800           0   0.00000     -0.301140E-02
    1527 1S   115  ARG  HD2     3   0.900000E-01   1.00800           0   0.00000     -0.301140E-02
    1528 1S   115  ARG  NE     57  -0.700000       14.0070           0   0.00000     -0.301140E-02
    1529 1S   115  ARG  HE      2   0.440000       1.00800           0   0.00000     -0.301140E-02
    1530 1S   115  ARG  CZ     20   0.640000       12.0110           0   0.00000     -0.301140E-02
    1531 1S   115  ARG  NH1    57  -0.800000       14.0070           0   0.00000     -0.301140E-02
    1532 1S   115  ARG  HH11    2   0.460000       1.00800           0   0.00000     -0.301140E-02
    1533 1S   115  ARG  HH12    2   0.460000       1.00800           0   0.00000     -0.301140E-02
    1534 1S   115  ARG  NH2    57  -0.800000       14.0070           0   0.00000     -0.301140E-02
    1535 1S   115  ARG  HH21    2   0.460000       1.00800           0   0.00000     -0.301140E-02
    1536 1S   115  ARG  HH22    2   0.460000       1.00800           0   0.00000     -0.301140E-02
    1537 1S   115  ARG  C      20   0.510000       12.0110           0   0.00000     -0.301140E-02
    1538 1S   115  ARG  O      70  -0.510000       15.9990           0   0.00000     -0.301140E-02
    1539 1S   116  LEU  N      54  -0.470000       14.0070           0   0.00000     -0.301140E-02
    1540 1S   116  LEU  HN      1   0.310000       1.00800           0   0.00000     -0.301140E-02
    1541 1S   116  LEU  CA     22   0.700000E-01   12.0110           0   0.00000     -0.301140E-02
    1542 1S   116  LEU  HA      6   0.900000E-01   1.00800           0   0.00000     -0.301140E-02
    1543 1S   116  LEU  CB     23  -0.180000       12.0110           0   0.00000     -0.301140E-02
    1544 1S   116  LEU  HB1     3   0.900000E-01   1.00800           0   0.00000     -0.301140E-02
    1545 1S   116  LEU  HB2     3   0.900000E-01   1.00800           0   0.00000     -0.301140E-02
    1546 1S   116  LEU  CG     22  -0.900000E-01   12.0110           0   0.00000     -0.301140E-02
    1547 1S   116  LEU  HG      3   0.900000E-01   1.00800           0   0.00000     -0.301140E-02
    1548 1S   116  LEU  CD1    24  -0.270000       12.0110           0   0.00000     -0.301140E-02
    1549 1S   116  LEU  HD11    3   0.900000E-01   1.00800           0   0.00000     -0.301140E-02
    1550 1S   116  LEU  HD12    3   0.900000E-01   1.00800           0   0.00000     -0.301140E-02
    1551 1S   116  LEU  HD13    3   0.900000E-01   1.00800           0   0.00000     -0.301140E-02
    1552 1S   116  LEU  CD2    24  -0.270000       12.0110           0   0.00000     -0.301140E-02
    1553 1S   116  LEU  HD21    3   0.900000E-01   1.00800           0   0.00000     -0.301140E-02
    1554 1S   116  LEU  HD22    3   0.900000E-01   1.00800           0   0.00000     -0.301140E-02
    1555 1S   116  LEU  HD23    3   0.900000E-01   1.00800           0   0.00000     -0.301140E-02
    1556 1S   116  LEU  C      20   0.510000       12.0110           0   0.00000     -0.301140E-02
    1557 1S   116  LEU  O      70  -0.510000       15.9990           0   0.00000     -0.301140E-02
    1558 1S   117  ASN  N      54  -0.470000       14.0070           0   0.00000     -0.301140E-02
    1559 1S   117  ASN  HN      1   0.310000       1.00800           0   0.00000     -0.301140E-02
    1560 1S   117  ASN  CA     22   0.700000E-01   12.0110           0   0.00000     -0.301140E-02
    1561 1S   117  ASN  HA      6   0.900000E-01   1.00800           0   0.00000     -0.301140E-02
    1562 1S   117  ASN  CB     23  -0.180000       12.0110           0   0.00000     -0.301140E-02
    1563 1S   117  ASN  HB1     3   0.900000E-01   1.00800           0   0.00000     -0.301140E-02
    1564 1S   117  ASN  HB2     3   0.900000E-01   1.00800           0   0.00000     -0.301140E-02
    1565 1S   117  ASN  CG     32   0.550000       12.0110           0   0.00000     -0.301140E-02
    1566 1S   117  ASN  OD1    70  -0.550000       15.9990           0   0.00000     -0.301140E-02
    1567 1S   117  ASN  ND2    55  -0.620000       14.0070           0   0.00000     -0.301140E-02
    1568 1S   117  ASN  HD21    1   0.320000       1.00800           0   0.00000     -0.301140E-02
    1569 1S   117  ASN  HD22    1   0.300000       1.00800           0   0.00000     -0.301140E-02
    1570 1S   117  ASN  C      20   0.510000       12.0110           0   0.00000     -0.301140E-02
    1571 1S   117  ASN  O      70  -0.510000       15.9990           0   0.00000     -0.301140E-02
    1572 1S   118  THR  N      54  -0.470000       14.0070           0   0.00000     -0.301140E-02
    1573 1S   118  THR  HN      1   0.310000       1.00800           0   0.00000     -0.301140E-02
    1574 1S   118  THR  CA     22   0.700000E-01   12.0110           0   0.00000     -0.301140E-02
    1575 1S   118  THR  HA      6   0.900000E-01   1.00800           0   0.00000     -0.301140E-02
    1576 1S   118  THR  CB     22   0.140000       12.0110           0   0.00000     -0.301140E-02
    1577 1S   118  THR  HB      3   0.900000E-01   1.00800           0   0.00000     -0.301140E-02
    1578 1S   118  THR  OG1    73  -0.660000       15.9990           0   0.00000     -0.301140E-02
    1579 1S   118  THR  HG1     1   0.430000       1.00800           0   0.00000     -0.301140E-02
    1580 1S   118  THR  CG2    24  -0.270000       12.0110           0   0.00000     -0.301140E-02
    1581 1S   118  THR  HG21    3   0.900000E-01   1.00800           0   0.00000     -0.301140E-02
    1582 1S   118  THR  HG22    3   0.900000E-01   1.00800           0   0.00000     -0.301140E-02
    1583 1S   118  THR  HG23    3   0.900000E-01   1.00800           0   0.00000     -0.301140E-02
    1584 1S   118  THR  C      20   0.510000       12.0110           0   0.00000     -0.301140E-02
    1585 1S   118  THR  O      70  -0.510000       15.9990           0   0.00000     -0.301140E-02
    1586 1S   119  ILE  N      54  -0.470000       14.0070           0   0.00000     -0.301140E-02
    1587 1S   119  ILE  HN      1   0.310000       1.00800           0   0.00000     -0.301140E-02
    1588 1S   119  ILE  CA     22   0.700000E-01   12.0110           0   0.00000     -0.301140E-02
    1589 1S   119  ILE  HA      6   0.900000E-01   1.00800           0   0.00000     -0.301140E-02
    1590 1S   119  ILE  CB     22  -0.900000E-01   12.0110           0   0.00000     -0.301140E-02
    1591 1S   119  ILE  HB      3   0.900000E-01   1.00800           0   0.00000     -0.301140E-02
    1592 1S   119  ILE  CG2    24  -0.270000       12.0110           0   0.00000     -0.301140E-02
    1593 1S   119  ILE  HG21    3   0.900000E-01   1.00800           0   0.00000     -0.301140E-02
    1594 1S   119  ILE  HG22    3   0.900000E-01   1.00800           0   0.00000     -0.301140E-02
    1595 1S   119  ILE  HG23    3   0.900000E-01   1.00800           0   0.00000     -0.301140E-02
    1596 1S   119  ILE  CG1    23  -0.180000       12.0110           0   0.00000     -0.301140E-02
    1597 1S   119  ILE  HG11    3   0.900000E-01   1.00800           0   0.00000     -0.301140E-02
    1598 1S   119  ILE  HG12    3   0.900000E-01   1.00800           0   0.00000     -0.301140E-02
    1599 1S   119  ILE  CD     24  -0.270000       12.0110           0   0.00000     -0.301140E-02
    1600 1S   119  ILE  HD1     3   0.900000E-01   1.00800           0   0.00000     -0.301140E-02
    1601 1S   119  ILE  HD2     3   0.900000E-01   1.00800           0   0.00000     -0.301140E-02
    1602 1S   119  ILE  HD3     3   0.900000E-01   1.00800           0   0.00000     -0.301140E-02
    1603 1S   119  ILE  C      20   0.510000       12.0110           0   0.00000     -0.301140E-02
    1604 1S   119  ILE  O      70  -0.510000       15.9990           0   0.00000     -0.301140E-02
    1605 1S   120  LEU  N      54  -0.470000       14.0070           0   0.00000     -0.301140E-02
    1606 1S   120  LEU  HN      1   0.310000       1.00800           0   0.00000     -0.301140E-02
    1607 1S   120  LEU  CA     22   0.700000E-01   12.0110           0   0.00000     -0.301140E-02
    1608 1S   120  LEU  HA      6   0.900000E-01   1.00800           0   0.00000     -0.301140E-02
    1609 1S   120  LEU  CB     23  -0.180000       12.0110           0   0.00000     -0.301140E-02
    1610 1S   120  LEU  HB1     3   0.900000E-01   1.00800           0   0.00000     -0.301140E-02
    1611 1S   120  LEU  HB2     3   0.900000E-01   1.00800           0   0.00000     -0.301140E-02
    1612 1S   120  LEU  CG     22  -0.900000E-01   12.0110           0   0.00000     -0.301140E-02
    1613 1S   120  LEU  HG      3   0.900000E-01   1.00800           0   0.00000     -0.301140E-02
    1614 1S   120  LEU  CD1    24  -0.270000       12.0110           0   0.00000     -0.301140E-02
    1615 1S   120  LEU  HD11    3   0.900000E-01   1.00800           0   0.00000     -0.301140E-02
    1616 1S   120  LEU  HD12    3   0.900000E-01   1.00800           0   0.00000     -0.301140E-02
    1617 1S   120  LEU  HD13    3   0.900000E-01   1.00800           0   0.00000     -0.301140E-02
    1618 1S   120  LEU  CD2    24  -0.270000       12.0110           0   0.00000     -0.301140E-02
    1619 1S   120  LEU  HD21    3   0.900000E-01   1.00800           0   0.00000     -0.301140E-02
    1620 1S   120  LEU  HD22    3   0.900000E-01   1.00800           0   0.00000     -0.301140E-02
    1621 1S   120  LEU  HD23    3   0.900000E-01   1.00800           0   0.00000     -0.301140E-02
    1622 1S   120  LEU  C      20   0.510000       12.0110           0   0.00000     -0.301140E-02
    1623 1S   120  LEU  O      70  -0.510000       15.9990           0   0.00000     -0.301140E-02
    1624 1S   121  ASN  N      54  -0.470000       14.0070           0   0.00000     -0.301140E-02
    1625 1S   121  ASN  HN      1   0.310000       1.00800           0   0.00000     -0.301140E-02
    1626 1S   121  ASN  CA     22   0.700000E-01   12.0110           0   0.00000     -0.301140E-02
    1627 1S   121  ASN  HA      6   0.900000E-01   1.00800           0   0.00000     -0.301140E-02
    1628 1S   121  ASN  CB     23  -0.180000       12.0110           0   0.00000     -0.301140E-02
    1629 1S   121  ASN  HB1     3   0.900000E-01   1.00800           0   0.00000     -0.301140E-02
    1630 1S   121  ASN  HB2     3   0.900000E-01   1.00800           0   0.00000     -0.301140E-02
    1631 1S   121  ASN  CG     32   0.550000       12.0110           0   0.00000     -0.301140E-02
    1632 1S   121  ASN  OD1    70  -0.550000       15.9990           0   0.00000     -0.301140E-02
    1633 1S   121  ASN  ND2    55  -0.620000       14.0070           0   0.00000     -0.301140E-02
    1634 1S   121  ASN  HD21    1   0.320000       1.00800           0   0.00000     -0.301140E-02
    1635 1S   121  ASN  HD22    1   0.300000       1.00800           0   0.00000     -0.301140E-02
    1636 1S   121  ASN  C      20   0.510000       12.0110           0   0.00000     -0.301140E-02
    1637 1S   121  ASN  O      70  -0.510000       15.9990           0   0.00000     -0.301140E-02
    1638 1S   122  THR  N      54  -0.470000       14.0070           0   0.00000     -0.301140E-02
    1639 1S   122  THR  HN      1   0.310000       1.00800           0   0.00000     -0.301140E-02
    1640 1S   122  THR  CA     22   0.700000E-01   12.0110           0   0.00000     -0.301140E-02
    1641 1S   122  THR  HA      6   0.900000E-01   1.00800           0   0.00000     -0.301140E-02
    1642 1S   122  THR  CB     22   0.140000       12.0110           0   0.00000     -0.301140E-02
    1643 1S   122  THR  HB      3   0.900000E-01   1.00800           0   0.00000     -0.301140E-02
    1644 1S   122  THR  OG1    73  -0.660000       15.9990           0   0.00000     -0.301140E-02
    1645 1S   122  THR  HG1     1   0.430000       1.00800           0   0.00000     -0.301140E-02
    1646 1S   122  THR  CG2    24  -0.270000       12.0110           0   0.00000     -0.301140E-02
    1647 1S   122  THR  HG21    3   0.900000E-01   1.00800           0   0.00000     -0.301140E-02
    1648 1S   122  THR  HG22    3   0.900000E-01   1.00800           0   0.00000     -0.301140E-02
    1649 1S   122  THR  HG23    3   0.900000E-01   1.00800           0   0.00000     -0.301140E-02
    1650 1S   122  THR  C      20   0.510000       12.0110           0   0.00000     -0.301140E-02
    1651 1S   122  THR  O      70  -0.510000       15.9990           0   0.00000     -0.301140E-02
    1652 1S   123  MET  N      54  -0.470000       14.0070           0   0.00000     -0.301140E-02
    1653 1S   123  MET  HN      1   0.310000       1.00800           0   0.00000     -0.301140E-02
    1654 1S   123  MET  CA     22   0.700000E-01   12.0110           0   0.00000     -0.301140E-02
    1655 1S   123  MET  HA      6   0.900000E-01   1.00800           0   0.00000     -0.301140E-02
    1656 1S   123  MET  CB     23  -0.180000       12.0110           0   0.00000     -0.301140E-02
    1657 1S   123  MET  HB1     3   0.900000E-01   1.00800           0   0.00000     -0.301140E-02
    1658 1S   123  MET  HB2     3   0.900000E-01   1.00800           0   0.00000     -0.301140E-02
    1659 1S   123  MET  CG     23  -0.140000       12.0110           0   0.00000     -0.301140E-02
    1660 1S   123  MET  HG1     3   0.900000E-01   1.00800           0   0.00000     -0.301140E-02
    1661 1S   123  MET  HG2     3   0.900000E-01   1.00800           0   0.00000     -0.301140E-02
    1662 1S   123  MET  SD     81  -0.900000E-01   32.0600           0   0.00000     -0.301140E-02
    1663 1S   123  MET  CE     24  -0.220000       12.0110           0   0.00000     -0.301140E-02
    1664 1S   123  MET  HE1     3   0.900000E-01   1.00800           0   0.00000     -0.301140E-02
    1665 1S   123  MET  HE2     3   0.900000E-01   1.00800           0   0.00000     -0.301140E-02
    1666 1S   123  MET  HE3     3   0.900000E-01   1.00800           0   0.00000     -0.301140E-02
    1667 1S   123  MET  C      20   0.510000       12.0110           0   0.00000     -0.301140E-02
    1668 1S   123  MET  O      70  -0.510000       15.9990           0   0.00000     -0.301140E-02
    1669 1S   124  SER  N      54  -0.470000       14.0070           0   0.00000     -0.301140E-02
    1670 1S   124  SER  HN      1   0.310000       1.00800           0   0.00000     -0.301140E-02
    1671 1S   124  SER  CA     22   0.700000E-01   12.0110           0   0.00000     -0.301140E-02
    1672 1S   124  SER  HA      6   0.900000E-01   1.00800           0   0.00000     -0.301140E-02
    1673 1S   124  SER  CB     23   0.500000E-01   12.0110           0   0.00000     -0.301140E-02
    1674 1S   124  SER  HB1     3   0.900000E-01   1.00800           0   0.00000     -0.301140E-02
    1675 1S   124  SER  HB2     3   0.900000E-01   1.00800           0   0.00000     -0.301140E-02
    1676 1S   124  SER  OG     73  -0.660000       15.9990           0   0.00000     -0.301140E-02
    1677 1S   124  SER  HG1     1   0.430000       1.00800           0   0.00000     -0.301140E-02
    1678 1S   124  SER  C      20   0.510000       12.0110           0   0.00000     -0.301140E-02
    1679 1S   124  SER  O      70  -0.510000       15.9990           0   0.00000     -0.301140E-02
    1680 1S   125  THR  N      54  -0.470000       14.0070           0   0.00000     -0.301140E-02
    1681 1S   125  THR  HN      1   0.310000       1.00800           0   0.00000     -0.301140E-02
    1682 1S   125  THR  CA     22   0.700000E-01   12.0110           0   0.00000     -0.301140E-02
    1683 1S   125  THR  HA      6   0.900000E-01   1.00800           0   0.00000     -0.301140E-02
    1684 1S   125  THR  CB     22   0.140000       12.0110           0   0.00000     -0.301140E-02
    1685 1S   125  THR  HB      3   0.900000E-01   1.00800           0   0.00000     -0.301140E-02
    1686 1S   125  THR  OG1    73  -0.660000       15.9990           0   0.00000     -0.301140E-02
    1687 1S   125  THR  HG1     1   0.430000       1.00800           0   0.00000     -0.301140E-02
    1688 1S   125  THR  CG2    24  -0.270000       12.0110           0   0.00000     -0.301140E-02
    1689 1S   125  THR  HG21    3   0.900000E-01   1.00800           0   0.00000     -0.301140E-02
    1690 1S   125  THR  HG22    3   0.900000E-01   1.00800           0   0.00000     -0.301140E-02
    1691 1S   125  THR  HG23    3   0.900000E-01   1.00800           0   0.00000     -0.301140E-02
    1692 1S   125  THR  C      20   0.510000       12.0110           0   0.00000     -0.301140E-02
    1693 1S   125  THR  O      70  -0.510000       15.9990           0   0.00000     -0.301140E-02
    1694 1S   126  ILE  N      54  -0.470000       14.0070           0   0.00000     -0.301140E-02
    1695 1S   126  ILE  HN      1   0.310000       1.00800           0   0.00000     -0.301140E-02
    1696 1S   126  ILE  CA     22   0.700000E-01   12.0110           0   0.00000     -0.301140E-02
    1697 1S   126  ILE  HA      6   0.900000E-01   1.00800           0   0.00000     -0.301140E-02
    1698 1S   126  ILE  CB     22  -0.900000E-01   12.0110           0   0.00000     -0.301140E-02
    1699 1S   126  ILE  HB      3   0.900000E-01   1.00800           0   0.00000     -0.301140E-02
    1700 1S   126  ILE  CG2    24  -0.270000       12.0110           0   0.00000     -0.301140E-02
    1701 1S   126  ILE  HG21    3   0.900000E-01   1.00800           0   0.00000     -0.301140E-02
    1702 1S   126  ILE  HG22    3   0.900000E-01   1.00800           0   0.00000     -0.301140E-02
    1703 1S   126  ILE  HG23    3   0.900000E-01   1.00800           0   0.00000     -0.301140E-02
    1704 1S   126  ILE  CG1    23  -0.180000       12.0110           0   0.00000     -0.301140E-02
    1705 1S   126  ILE  HG11    3   0.900000E-01   1.00800           0   0.00000     -0.301140E-02
    1706 1S   126  ILE  HG12    3   0.900000E-01   1.00800           0   0.00000     -0.301140E-02
    1707 1S   126  ILE  CD     24  -0.270000       12.0110           0   0.00000     -0.301140E-02
    1708 1S   126  ILE  HD1     3   0.900000E-01   1.00800           0   0.00000     -0.301140E-02
    1709 1S   126  ILE  HD2     3   0.900000E-01   1.00800           0   0.00000     -0.301140E-02
    1710 1S   126  ILE  HD3     3   0.900000E-01   1.00800           0   0.00000     -0.301140E-02
    1711 1S   126  ILE  C      20   0.510000       12.0110           0   0.00000     -0.301140E-02
    1712 1S   126  ILE  O      70  -0.510000       15.9990           0   0.00000     -0.301140E-02
    1713 1S   127  TYR  N      54  -0.470000       14.0070           0   0.00000     -0.301140E-02
    1714 1S   127  TYR  HN      1   0.310000       1.00800           0   0.00000     -0.301140E-02
    1715 1S   127  TYR  CA     22   0.700000E-01   12.0110           0   0.00000     -0.301140E-02
    1716 1S   127  TYR  HA      6   0.900000E-01   1.00800           0   0.00000     -0.301140E-02
    1717 1S   127  TYR  CB     23  -0.180000       12.0110           0   0.00000     -0.301140E-02
    1718 1S   127  TYR  HB1     3   0.900000E-01   1.00800           0   0.00000     -0.301140E-02
    1719 1S   127  TYR  HB2     3   0.900000E-01   1.00800           0   0.00000     -0.301140E-02
    1720 1S   127  TYR  CG     21    0.00000       12.0110           0   0.00000     -0.301140E-02
    1721 1S   127  TYR  CD1    21  -0.115000       12.0110           0   0.00000     -0.301140E-02
    1722 1S   127  TYR  HD1     5   0.115000       1.00800           0   0.00000     -0.301140E-02
    1723 1S   127  TYR  CE1    21  -0.115000       12.0110           0   0.00000     -0.301140E-02
    1724 1S   127  TYR  HE1     5   0.115000       1.00800           0   0.00000     -0.301140E-02
    1725 1S   127  TYR  CZ     21   0.110000       12.0110           0   0.00000     -0.301140E-02
    1726 1S   127  TYR  OH     73  -0.540000       15.9990           0   0.00000     -0.301140E-02
    1727 1S   127  TYR  HH      1   0.430000       1.00800           0   0.00000     -0.301140E-02
    1728 1S   127  TYR  CD2    21  -0.115000       12.0110           0   0.00000     -0.301140E-02
    1729 1S   127  TYR  HD2     5   0.115000       1.00800           0   0.00000     -0.301140E-02
    1730 1S   127  TYR  CE2    21  -0.115000       12.0110           0   0.00000     -0.301140E-02
    1731 1S   127  TYR  HE2     5   0.115000       1.00800           0   0.00000     -0.301140E-02
    1732 1S   127  TYR  C      20   0.510000       12.0110           0   0.00000     -0.301140E-02
    1733 1S   127  TYR  O      70  -0.510000       15.9990           0   0.00000     -0.301140E-02
    1734 1S   128  SER  N      54  -0.470000       14.0070           0   0.00000     -0.301140E-02
    1735 1S   128  SER  HN      1   0.310000       1.00800           0   0.00000     -0.301140E-02
    1736 1S   128  SER  CA     22   0.700000E-01   12.0110           0   0.00000     -0.301140E-02
    1737 1S   128  SER  HA      6   0.900000E-01   1.00800           0   0.00000     -0.301140E-02
    1738 1S   128  SER  CB     23   0.500000E-01   12.0110           0   0.00000     -0.301140E-02
    1739 1S   128  SER  HB1     3   0.900000E-01   1.00800           0   0.00000     -0.301140E-02
    1740 1S   128  SER  HB2     3   0.900000E-01   1.00800           0   0.00000     -0.301140E-02
    1741 1S   128  SER  OG     73  -0.660000       15.9990           0   0.00000     -0.301140E-02
    1742 1S   128  SER  HG1     1   0.430000       1.00800           0   0.00000     -0.301140E-02
    1743 1S   128  SER  C      20   0.510000       12.0110           0   0.00000     -0.301140E-02
    1744 1S   128  SER  O      70  -0.510000       15.9990           0   0.00000     -0.301140E-02
    1745 1S   129  THR  N      54  -0.470000       14.0070           0   0.00000     -0.301140E-02
    1746 1S   129  THR  HN      1   0.310000       1.00800           0   0.00000     -0.301140E-02
    1747 1S   129  THR  CA     22   0.700000E-01   12.0110           0   0.00000     -0.301140E-02
    1748 1S   129  THR  HA      6   0.900000E-01   1.00800           0   0.00000     -0.301140E-02
    1749 1S   129  THR  CB     22   0.140000       12.0110           0   0.00000     -0.301140E-02
    1750 1S   129  THR  HB      3   0.900000E-01   1.00800           0   0.00000     -0.301140E-02
    1751 1S   129  THR  OG1    73  -0.660000       15.9990           0   0.00000     -0.301140E-02
    1752 1S   129  THR  HG1     1   0.430000       1.00800           0   0.00000     -0.301140E-02
    1753 1S   129  THR  CG2    24  -0.270000       12.0110           0   0.00000     -0.301140E-02
    1754 1S   129  THR  HG21    3   0.900000E-01   1.00800           0   0.00000     -0.301140E-02
    1755 1S   129  THR  HG22    3   0.900000E-01   1.00800           0   0.00000     -0.301140E-02
    1756 1S   129  THR  HG23    3   0.900000E-01   1.00800           0   0.00000     -0.301140E-02
    1757 1S   129  THR  C      20   0.510000       12.0110           0   0.00000     -0.301140E-02
    1758 1S   129  THR  O      70  -0.510000       15.9990           0   0.00000     -0.301140E-02
    1759 1S   130  GLY  N      54  -0.470000       14.0070           0   0.00000     -0.301140E-02
    1760 1S   130  GLY  HN      1   0.310000       1.00800           0   0.00000     -0.301140E-02
    1761 1S   130  GLY  CA     23  -0.200000E-01   12.0110           0   0.00000     -0.301140E-02
    1762 1S   130  GLY  HA1     6   0.900000E-01   1.00800           0   0.00000     -0.301140E-02
    1763 1S   130  GLY  HA2     6   0.900000E-01   1.00800           0   0.00000     -0.301140E-02
    1764 1S   130  GLY  C      20   0.510000       12.0110           0   0.00000     -0.301140E-02
    1765 1S   130  GLY  O      70  -0.510000       15.9990           0   0.00000     -0.301140E-02
    1766 1S   131  LYS  N      54  -0.470000       14.0070           0   0.00000     -0.301140E-02
    1767 1S   131  LYS  HN      1   0.310000       1.00800           0   0.00000     -0.301140E-02
    1768 1S   131  LYS  CA     22   0.700000E-01   12.0110           0   0.00000     -0.301140E-02
    1769 1S   131  LYS  HA      6   0.900000E-01   1.00800           0   0.00000     -0.301140E-02
    1770 1S   131  LYS  CB     23  -0.180000       12.0110           0   0.00000     -0.301140E-02
    1771 1S   131  LYS  HB1     3   0.900000E-01   1.00800           0   0.00000     -0.301140E-02
    1772 1S   131  LYS  HB2     3   0.900000E-01   1.00800           0   0.00000     -0.301140E-02
    1773 1S   131  LYS  CG     23  -0.180000       12.0110           0   0.00000     -0.301140E-02
    1774 1S   131  LYS  HG1     3   0.900000E-01   1.00800           0   0.00000     -0.301140E-02
    1775 1S   131  LYS  HG2     3   0.900000E-01   1.00800           0   0.00000     -0.301140E-02
    1776 1S   131  LYS  CD     23  -0.180000       12.0110           0   0.00000     -0.301140E-02
    1777 1S   131  LYS  HD1     3   0.900000E-01   1.00800           0   0.00000     -0.301140E-02
    1778 1S   131  LYS  HD2     3   0.900000E-01   1.00800           0   0.00000     -0.301140E-02
    1779 1S   131  LYS  CE     23   0.210000       12.0110           0   0.00000     -0.301140E-02
    1780 1S   131  LYS  HE1     3   0.500000E-01   1.00800           0   0.00000     -0.301140E-02
    1781 1S   131  LYS  HE2     3   0.500000E-01   1.00800           0   0.00000     -0.301140E-02
    1782 1S   131  LYS  NZ     56  -0.300000       14.0070           0   0.00000     -0.301140E-02
    1783 1S   131  LYS  HZ1     2   0.330000       1.00800           0   0.00000     -0.301140E-02
    1784 1S   131  LYS  HZ2     2   0.330000       1.00800           0   0.00000     -0.301140E-02
    1785 1S   131  LYS  HZ3     2   0.330000       1.00800           0   0.00000     -0.301140E-02
    1786 1S   131  LYS  C      20   0.510000       12.0110           0   0.00000     -0.301140E-02
    1787 1S   131  LYS  O      70  -0.510000       15.9990           0   0.00000     -0.301140E-02
    1788 1S   132  VAL  N      54  -0.470000       14.0070           0   0.00000     -0.301140E-02
    1789 1S   132  VAL  HN      1   0.310000       1.00800           0   0.00000     -0.301140E-02
    1790 1S   132  VAL  CA     22   0.700000E-01   12.0110           0   0.00000     -0.301140E-02
    1791 1S   132  VAL  HA      6   0.900000E-01   1.00800           0   0.00000     -0.301140E-02
    1792 1S   132  VAL  CB     22  -0.900000E-01   12.0110           0   0.00000     -0.301140E-02
    1793 1S   132  VAL  HB      3   0.900000E-01   1.00800           0   0.00000     -0.301140E-02
    1794 1S   132  VAL  CG1    24  -0.270000       12.0110           0   0.00000     -0.301140E-02
    1795 1S   132  VAL  HG11    3   0.900000E-01   1.00800           0   0.00000     -0.301140E-02
    1796 1S   132  VAL  HG12    3   0.900000E-01   1.00800           0   0.00000     -0.301140E-02
    1797 1S   132  VAL  HG13    3   0.900000E-01   1.00800           0   0.00000     -0.301140E-02
    1798 1S   132  VAL  CG2    24  -0.270000       12.0110           0   0.00000     -0.301140E-02
    1799 1S   132  VAL  HG21    3   0.900000E-01   1.00800           0   0.00000     -0.301140E-02
    1800 1S   132  VAL  HG22    3   0.900000E-01   1.00800           0   0.00000     -0.301140E-02
    1801 1S   132  VAL  HG23    3   0.900000E-01   1.00800           0   0.00000     -0.301140E-02
    1802 1S   132  VAL  C      20   0.510000       12.0110           0   0.00000     -0.301140E-02
    1803 1S   132  VAL  O      70  -0.510000       15.9990           0   0.00000     -0.301140E-02
    1804 1S   133  CYS  N      54  -0.470000       14.0070           0   0.00000     -0.301140E-02
    1805 1S   133  CYS  HN      1   0.310000       1.00800           0   0.00000     -0.301140E-02
    1806 1S   133  CYS  CA     22   0.700000E-01   12.0110           0   0.00000     -0.301140E-02
    1807 1S   133  CYS  HA      6   0.900000E-01   1.00800           0   0.00000     -0.301140E-02
    1808 1S   133  CYS  CB     23  -0.100000       12.0110           0   0.00000     -0.301140E-02
    1809 1S   133  CYS  HB1     3   0.900000E-01   1.00800           0   0.00000     -0.301140E-02
    1810 1S   133  CYS  HB2     3   0.900000E-01   1.00800           0   0.00000     -0.301140E-02
    1811 1S   133  CYS  SG     82  -0.800000E-01   32.0600           0   0.00000     -0.301140E-02
    1812 1S   133  CYS  C      20   0.510000       12.0110           0   0.00000     -0.301140E-02
    1813 1S   133  CYS  O      70  -0.510000       15.9990           0   0.00000     -0.301140E-02
    1814 1S   134  ASN  N      54  -0.470000       14.0070           0   0.00000     -0.301140E-02
    1815 1S   134  ASN  HN      1   0.310000       1.00800           0   0.00000     -0.301140E-02
    1816 1S   134  ASN  CA     22   0.700000E-01   12.0110           0   0.00000     -0.301140E-02
    1817 1S   134  ASN  HA      6   0.900000E-01   1.00800           0   0.00000     -0.301140E-02
    1818 1S   134  ASN  CB     23  -0.180000       12.0110           0   0.00000     -0.301140E-02
    1819 1S   134  ASN  HB1     3   0.900000E-01   1.00800           0   0.00000     -0.301140E-02
    1820 1S   134  ASN  HB2     3   0.900000E-01   1.00800           0   0.00000     -0.301140E-02
    1821 1S   134  ASN  CG     32   0.550000       12.0110           0   0.00000     -0.301140E-02
    1822 1S   134  ASN  OD1    70  -0.550000       15.9990           0   0.00000     -0.301140E-02
    1823 1S   134  ASN  ND2    55  -0.620000       14.0070           0   0.00000     -0.301140E-02
    1824 1S   134  ASN  HD21    1   0.320000       1.00800           0   0.00000     -0.301140E-02
    1825 1S   134  ASN  HD22    1   0.300000       1.00800           0   0.00000     -0.301140E-02
    1826 1S   134  ASN  C      20   0.510000       12.0110           0   0.00000     -0.301140E-02
    1827 1S   134  ASN  O      70  -0.510000       15.9990           0   0.00000     -0.301140E-02
    1828 1S   135  PRO  N      50  -0.290000       14.0070           0   0.00000     -0.301140E-02
    1829 1S   135  PRO  CD     31    0.00000       12.0110           0   0.00000     -0.301140E-02
    1830 1S   135  PRO  HD1     3   0.900000E-01   1.00800           0   0.00000     -0.301140E-02
    1831 1S   135  PRO  HD2     3   0.900000E-01   1.00800           0   0.00000     -0.301140E-02
    1832 1S   135  PRO  CA     29   0.200000E-01   12.0110           0   0.00000     -0.301140E-02
    1833 1S   135  PRO  HA      6   0.900000E-01   1.00800           0   0.00000     -0.301140E-02
    1834 1S   135  PRO  CB     30  -0.180000       12.0110           0   0.00000     -0.301140E-02
    1835 1S   135  PRO  HB1     3   0.900000E-01   1.00800           0   0.00000     -0.301140E-02
    1836 1S   135  PRO  HB2     3   0.900000E-01   1.00800           0   0.00000     -0.301140E-02
    1837 1S   135  PRO  CG     30  -0.180000       12.0110           0   0.00000     -0.301140E-02
    1838 1S   135  PRO  HG1     3   0.900000E-01   1.00800           0   0.00000     -0.301140E-02
    1839 1S   135  PRO  HG2     3   0.900000E-01   1.00800           0   0.00000     -0.301140E-02
    1840 1S   135  PRO  C      20   0.510000       12.0110           0   0.00000     -0.301140E-02
    1841 1S   135  PRO  O      70  -0.510000       15.9990           0   0.00000     -0.301140E-02
    1842 1S   136  ASP  N      54  -0.470000       14.0070           0   0.00000     -0.301140E-02
    1843 1S   136  ASP  HN      1   0.310000       1.00800           0   0.00000     -0.301140E-02
    1844 1S   136  ASP  CA     22   0.700000E-01   12.0110           0   0.00000     -0.301140E-02
    1845 1S   136  ASP  HA      6   0.900000E-01   1.00800           0   0.00000     -0.301140E-02
    1846 1S   136  ASP  CB     23  -0.280000       12.0110           0   0.00000     -0.301140E-02
    1847 1S   136  ASP  HB1     3   0.900000E-01   1.00800           0   0.00000     -0.301140E-02
    1848 1S   136  ASP  HB2     3   0.900000E-01   1.00800           0   0.00000     -0.301140E-02
    1849 1S   136  ASP  CG     32   0.620000       12.0110           0   0.00000     -0.301140E-02
    1850 1S   136  ASP  OD1    72  -0.760000       15.9990           0   0.00000     -0.301140E-02
    1851 1S   136  ASP  OD2    72  -0.760000       15.9990           0   0.00000     -0.301140E-02
    1852 1S   136  ASP  C      20   0.510000       12.0110           0   0.00000     -0.301140E-02
    1853 1S   136  ASP  O      70  -0.510000       15.9990           0   0.00000     -0.301140E-02
    1854 1S   137  ASN  N      54  -0.470000       14.0070           0   0.00000     -0.301140E-02
    1855 1S   137  ASN  HN      1   0.310000       1.00800           0   0.00000     -0.301140E-02
    1856 1S   137  ASN  CA     22   0.700000E-01   12.0110           0   0.00000     -0.301140E-02
    1857 1S   137  ASN  HA      6   0.900000E-01   1.00800           0   0.00000     -0.301140E-02
    1858 1S   137  ASN  CB     23  -0.180000       12.0110           0   0.00000     -0.301140E-02
    1859 1S   137  ASN  HB1     3   0.900000E-01   1.00800           0   0.00000     -0.301140E-02
    1860 1S   137  ASN  HB2     3   0.900000E-01   1.00800           0   0.00000     -0.301140E-02
    1861 1S   137  ASN  CG     32   0.550000       12.0110           0   0.00000     -0.301140E-02
    1862 1S   137  ASN  OD1    70  -0.550000       15.9990           0   0.00000     -0.301140E-02
    1863 1S   137  ASN  ND2    55  -0.620000       14.0070           0   0.00000     -0.301140E-02
    1864 1S   137  ASN  HD21    1   0.320000       1.00800           0   0.00000     -0.301140E-02
    1865 1S   137  ASN  HD22    1   0.300000       1.00800           0   0.00000     -0.301140E-02
    1866 1S   137  ASN  C      20   0.510000       12.0110           0   0.00000     -0.301140E-02
    1867 1S   137  ASN  O      70  -0.510000       15.9990           0   0.00000     -0.301140E-02
    1868 1S   138  PRO  N      50  -0.290000       14.0070           0   0.00000     -0.301140E-02
    1869 1S   138  PRO  CD     31    0.00000       12.0110           0   0.00000     -0.301140E-02
    1870 1S   138  PRO  HD1     3   0.900000E-01   1.00800           0   0.00000     -0.301140E-02
    1871 1S   138  PRO  HD2     3   0.900000E-01   1.00800           0   0.00000     -0.301140E-02
    1872 1S   138  PRO  CA     29   0.200000E-01   12.0110           0   0.00000     -0.301140E-02
    1873 1S   138  PRO  HA      6   0.900000E-01   1.00800           0   0.00000     -0.301140E-02
    1874 1S   138  PRO  CB     30  -0.180000       12.0110           0   0.00000     -0.301140E-02
    1875 1S   138  PRO  HB1     3   0.900000E-01   1.00800           0   0.00000     -0.301140E-02
    1876 1S   138  PRO  HB2     3   0.900000E-01   1.00800           0   0.00000     -0.301140E-02
    1877 1S   138  PRO  CG     30  -0.180000       12.0110           0   0.00000     -0.301140E-02
    1878 1S   138  PRO  HG1     3   0.900000E-01   1.00800           0   0.00000     -0.301140E-02
    1879 1S   138  PRO  HG2     3   0.900000E-01   1.00800           0   0.00000     -0.301140E-02
    1880 1S   138  PRO  C      20   0.510000       12.0110           0   0.00000     -0.301140E-02
    1881 1S   138  PRO  O      70  -0.510000       15.9990           0   0.00000     -0.301140E-02
    1882 1S   139  GLN  N      54  -0.470000       14.0070           0   0.00000     -0.301140E-02
    1883 1S   139  GLN  HN      1   0.310000       1.00800           0   0.00000     -0.301140E-02
    1884 1S   139  GLN  CA     22   0.700000E-01   12.0110           0   0.00000     -0.301140E-02
    1885 1S   139  GLN  HA      6   0.900000E-01   1.00800           0   0.00000     -0.301140E-02
    1886 1S   139  GLN  CB     23  -0.180000       12.0110           0   0.00000     -0.301140E-02
    1887 1S   139  GLN  HB1     3   0.900000E-01   1.00800           0   0.00000     -0.301140E-02
    1888 1S   139  GLN  HB2     3   0.900000E-01   1.00800           0   0.00000     -0.301140E-02
    1889 1S   139  GLN  CG     23  -0.180000       12.0110           0   0.00000     -0.301140E-02
    1890 1S   139  GLN  HG1     3   0.900000E-01   1.00800           0   0.00000     -0.301140E-02
    1891 1S   139  GLN  HG2     3   0.900000E-01   1.00800           0   0.00000     -0.301140E-02
    1892 1S   139  GLN  CD     32   0.550000       12.0110           0   0.00000     -0.301140E-02
    1893 1S   139  GLN  OE1    70  -0.550000       15.9990           0   0.00000     -0.301140E-02
    1894 1S   139  GLN  NE2    55  -0.620000       14.0070           0   0.00000     -0.301140E-02
    1895 1S   139  GLN  HE21    1   0.320000       1.00800           0   0.00000     -0.301140E-02
    1896 1S   139  GLN  HE22    1   0.300000       1.00800           0   0.00000     -0.301140E-02
    1897 1S   139  GLN  C      20   0.510000       12.0110           0   0.00000     -0.301140E-02
    1898 1S   139  GLN  O      70  -0.510000       15.9990           0   0.00000     -0.301140E-02
    1899 1S   140  GLU  N      54  -0.470000       14.0070           0   0.00000     -0.301140E-02
    1900 1S   140  GLU  HN      1   0.310000       1.00800           0   0.00000     -0.301140E-02
    1901 1S   140  GLU  CA     22   0.700000E-01   12.0110           0   0.00000     -0.301140E-02
    1902 1S   140  GLU  HA      6   0.900000E-01   1.00800           0   0.00000     -0.301140E-02
    1903 1S   140  GLU  CB     23  -0.180000       12.0110           0   0.00000     -0.301140E-02
    1904 1S   140  GLU  HB1     3   0.900000E-01   1.00800           0   0.00000     -0.301140E-02
    1905 1S   140  GLU  HB2     3   0.900000E-01   1.00800           0   0.00000     -0.301140E-02
    1906 1S   140  GLU  CG     23  -0.280000       12.0110           0   0.00000     -0.301140E-02
    1907 1S   140  GLU  HG1     3   0.900000E-01   1.00800           0   0.00000     -0.301140E-02
    1908 1S   140  GLU  HG2     3   0.900000E-01   1.00800           0   0.00000     -0.301140E-02
    1909 1S   140  GLU  CD     32   0.620000       12.0110           0   0.00000     -0.301140E-02
    1910 1S   140  GLU  OE1    72  -0.760000       15.9990           0   0.00000     -0.301140E-02
    1911 1S   140  GLU  OE2    72  -0.760000       15.9990           0   0.00000     -0.301140E-02
    1912 1S   140  GLU  C      20   0.510000       12.0110           0   0.00000     -0.301140E-02
    1913 1S   140  GLU  O      70  -0.510000       15.9990           0   0.00000     -0.301140E-02
    1914 1S   141  CYS  N      54  -0.470000       14.0070           0   0.00000     -0.301140E-02
    1915 1S   141  CYS  HN      1   0.310000       1.00800           0   0.00000     -0.301140E-02
    1916 1S   141  CYS  CA     22   0.700000E-01   12.0110           0   0.00000     -0.301140E-02
    1917 1S   141  CYS  HA      6   0.900000E-01   1.00800           0   0.00000     -0.301140E-02
    1918 1S   141  CYS  CB     23  -0.100000       12.0110           0   0.00000     -0.301140E-02
    1919 1S   141  CYS  HB1     3   0.900000E-01   1.00800           0   0.00000     -0.301140E-02
    1920 1S   141  CYS  HB2     3   0.900000E-01   1.00800           0   0.00000     -0.301140E-02
    1921 1S   141  CYS  SG     82  -0.800000E-01   32.0600           0   0.00000     -0.301140E-02
    1922 1S   141  CYS  C      20   0.510000       12.0110           0   0.00000     -0.301140E-02
    1923 1S   141  CYS  O      70  -0.510000       15.9990           0   0.00000     -0.301140E-02
    1924 1S   142  LEU  N      54  -0.470000       14.0070           0   0.00000     -0.301140E-02
    1925 1S   142  LEU  HN      1   0.310000       1.00800           0   0.00000     -0.301140E-02
    1926 1S   142  LEU  CA     22   0.700000E-01   12.0110           0   0.00000     -0.301140E-02
    1927 1S   142  LEU  HA      6   0.900000E-01   1.00800           0   0.00000     -0.301140E-02
    1928 1S   142  LEU  CB     23  -0.180000       12.0110           0   0.00000     -0.301140E-02
    1929 1S   142  LEU  HB1     3   0.900000E-01   1.00800           0   0.00000     -0.301140E-02
    1930 1S   142  LEU  HB2     3   0.900000E-01   1.00800           0   0.00000     -0.301140E-02
    1931 1S   142  LEU  CG     22  -0.900000E-01   12.0110           0   0.00000     -0.301140E-02
    1932 1S   142  LEU  HG      3   0.900000E-01   1.00800           0   0.00000     -0.301140E-02
    1933 1S   142  LEU  CD1    24  -0.270000       12.0110           0   0.00000     -0.301140E-02
    1934 1S   142  LEU  HD11    3   0.900000E-01   1.00800           0   0.00000     -0.301140E-02
    1935 1S   142  LEU  HD12    3   0.900000E-01   1.00800           0   0.00000     -0.301140E-02
    1936 1S   142  LEU  HD13    3   0.900000E-01   1.00800           0   0.00000     -0.301140E-02
    1937 1S   142  LEU  CD2    24  -0.270000       12.0110           0   0.00000     -0.301140E-02
    1938 1S   142  LEU  HD21    3   0.900000E-01   1.00800           0   0.00000     -0.301140E-02
    1939 1S   142  LEU  HD22    3   0.900000E-01   1.00800           0   0.00000     -0.301140E-02
    1940 1S   142  LEU  HD23    3   0.900000E-01   1.00800           0   0.00000     -0.301140E-02
    1941 1S   142  LEU  C      20   0.510000       12.0110           0   0.00000     -0.301140E-02
    1942 1S   142  LEU  O      70  -0.510000       15.9990           0   0.00000     -0.301140E-02
    1943 1S   143  LEU  N      54  -0.470000       14.0070           0   0.00000     -0.301140E-02
    1944 1S   143  LEU  HN      1   0.310000       1.00800           0   0.00000     -0.301140E-02
    1945 1S   143  LEU  CA     22   0.700000E-01   12.0110           0   0.00000     -0.301140E-02
    1946 1S   143  LEU  HA      6   0.900000E-01   1.00800           0   0.00000     -0.301140E-02
    1947 1S   143  LEU  CB     23  -0.180000       12.0110           0   0.00000     -0.301140E-02
    1948 1S   143  LEU  HB1     3   0.900000E-01   1.00800           0   0.00000     -0.301140E-02
    1949 1S   143  LEU  HB2     3   0.900000E-01   1.00800           0   0.00000     -0.301140E-02
    1950 1S   143  LEU  CG     22  -0.900000E-01   12.0110           0   0.00000     -0.301140E-02
    1951 1S   143  LEU  HG      3   0.900000E-01   1.00800           0   0.00000     -0.301140E-02
    1952 1S   143  LEU  CD1    24  -0.270000       12.0110           0   0.00000     -0.301140E-02
    1953 1S   143  LEU  HD11    3   0.900000E-01   1.00800           0   0.00000     -0.301140E-02
    1954 1S   143  LEU  HD12    3   0.900000E-01   1.00800           0   0.00000     -0.301140E-02
    1955 1S   143  LEU  HD13    3   0.900000E-01   1.00800           0   0.00000     -0.301140E-02
    1956 1S   143  LEU  CD2    24  -0.270000       12.0110           0   0.00000     -0.301140E-02
    1957 1S   143  LEU  HD21    3   0.900000E-01   1.00800           0   0.00000     -0.301140E-02
    1958 1S   143  LEU  HD22    3   0.900000E-01   1.00800           0   0.00000     -0.301140E-02
    1959 1S   143  LEU  HD23    3   0.900000E-01   1.00800           0   0.00000     -0.301140E-02
    1960 1S   143  LEU  C      20   0.510000       12.0110           0   0.00000     -0.301140E-02
    1961 1S   143  LEU  O      70  -0.510000       15.9990           0   0.00000     -0.301140E-02
    1962 1S   144  LEU  N      54  -0.470000       14.0070           0   0.00000     -0.301140E-02
    1963 1S   144  LEU  HN      1   0.310000       1.00800           0   0.00000     -0.301140E-02
    1964 1S   144  LEU  CA     22   0.700000E-01   12.0110           0   0.00000     -0.301140E-02
    1965 1S   144  LEU  HA      6   0.900000E-01   1.00800           0   0.00000     -0.301140E-02
    1966 1S   144  LEU  CB     23  -0.180000       12.0110           0   0.00000     -0.301140E-02
    1967 1S   144  LEU  HB1     3   0.900000E-01   1.00800           0   0.00000     -0.301140E-02
    1968 1S   144  LEU  HB2     3   0.900000E-01   1.00800           0   0.00000     -0.301140E-02
    1969 1S   144  LEU  CG     22  -0.900000E-01   12.0110           0   0.00000     -0.301140E-02
    1970 1S   144  LEU  HG      3   0.900000E-01   1.00800           0   0.00000     -0.301140E-02
    1971 1S   144  LEU  CD1    24  -0.270000       12.0110           0   0.00000     -0.301140E-02
    1972 1S   144  LEU  HD11    3   0.900000E-01   1.00800           0   0.00000     -0.301140E-02
    1973 1S   144  LEU  HD12    3   0.900000E-01   1.00800           0   0.00000     -0.301140E-02
    1974 1S   144  LEU  HD13    3   0.900000E-01   1.00800           0   0.00000     -0.301140E-02
    1975 1S   144  LEU  CD2    24  -0.270000       12.0110           0   0.00000     -0.301140E-02
    1976 1S   144  LEU  HD21    3   0.900000E-01   1.00800           0   0.00000     -0.301140E-02
    1977 1S   144  LEU  HD22    3   0.900000E-01   1.00800           0   0.00000     -0.301140E-02
    1978 1S   144  LEU  HD23    3   0.900000E-01   1.00800           0   0.00000     -0.301140E-02
    1979 1S   144  LEU  C      20   0.510000       12.0110           0   0.00000     -0.301140E-02
    1980 1S   144  LEU  O      70  -0.510000       15.9990           0   0.00000     -0.301140E-02
    1981 1S   145  GLU  N      54  -0.470000       14.0070           0   0.00000     -0.301140E-02
    1982 1S   145  GLU  HN      1   0.310000       1.00800           0   0.00000     -0.301140E-02
    1983 1S   145  GLU  CA     22   0.700000E-01   12.0110           0   0.00000     -0.301140E-02
    1984 1S   145  GLU  HA      6   0.900000E-01   1.00800           0   0.00000     -0.301140E-02
    1985 1S   145  GLU  CB     23  -0.180000       12.0110           0   0.00000     -0.301140E-02
    1986 1S   145  GLU  HB1     3   0.900000E-01   1.00800           0   0.00000     -0.301140E-02
    1987 1S   145  GLU  HB2     3   0.900000E-01   1.00800           0   0.00000     -0.301140E-02
    1988 1S   145  GLU  CG     23  -0.280000       12.0110           0   0.00000     -0.301140E-02
    1989 1S   145  GLU  HG1     3   0.900000E-01   1.00800           0   0.00000     -0.301140E-02
    1990 1S   145  GLU  HG2     3   0.900000E-01   1.00800           0   0.00000     -0.301140E-02
    1991 1S   145  GLU  CD     32   0.620000       12.0110           0   0.00000     -0.301140E-02
    1992 1S   145  GLU  OE1    72  -0.760000       15.9990           0   0.00000     -0.301140E-02
    1993 1S   145  GLU  OE2    72  -0.760000       15.9990           0   0.00000     -0.301140E-02
    1994 1S   145  GLU  C      20   0.510000       12.0110           0   0.00000     -0.301140E-02
    1995 1S   145  GLU  O      70  -0.510000       15.9990           0   0.00000     -0.301140E-02
    1996 1S   146  PRO  N      50  -0.290000       14.0070           0   0.00000     -0.301140E-02
    1997 1S   146  PRO  CD     31    0.00000       12.0110           0   0.00000     -0.301140E-02
    1998 1S   146  PRO  HD1     3   0.900000E-01   1.00800           0   0.00000     -0.301140E-02
    1999 1S   146  PRO  HD2     3   0.900000E-01   1.00800           0   0.00000     -0.301140E-02
    2000 1S   146  PRO  CA     29   0.200000E-01   12.0110           0   0.00000     -0.301140E-02
    2001 1S   146  PRO  HA      6   0.900000E-01   1.00800           0   0.00000     -0.301140E-02
    2002 1S   146  PRO  CB     30  -0.180000       12.0110           0   0.00000     -0.301140E-02
    2003 1S   146  PRO  HB1     3   0.900000E-01   1.00800           0   0.00000     -0.301140E-02
    2004 1S   146  PRO  HB2     3   0.900000E-01   1.00800           0   0.00000     -0.301140E-02
    2005 1S   146  PRO  CG     30  -0.180000       12.0110           0   0.00000     -0.301140E-02
    2006 1S   146  PRO  HG1     3   0.900000E-01   1.00800           0   0.00000     -0.301140E-02
    2007 1S   146  PRO  HG2     3   0.900000E-01   1.00800           0   0.00000     -0.301140E-02
    2008 1S   146  PRO  C      20   0.510000       12.0110           0   0.00000     -0.301140E-02
    2009 1S   146  PRO  O      70  -0.510000       15.9990           0   0.00000     -0.301140E-02
    2010 1S   147  GLY  N      54  -0.470000       14.0070           0   0.00000     -0.301140E-02
    2011 1S   147  GLY  HN      1   0.310000       1.00800           0   0.00000     -0.301140E-02
    2012 1S   147  GLY  CA     23  -0.200000E-01   12.0110           0   0.00000     -0.301140E-02
    2013 1S   147  GLY  HA1     6   0.900000E-01   1.00800           0   0.00000     -0.301140E-02
    2014 1S   147  GLY  HA2     6   0.900000E-01   1.00800           0   0.00000     -0.301140E-02
    2015 1S   147  GLY  C      20   0.510000       12.0110           0   0.00000     -0.301140E-02
    2016 1S   147  GLY  O      70  -0.510000       15.9990           0   0.00000     -0.301140E-02
    2017 1S   148  LEU  N      54  -0.470000       14.0070           0   0.00000     -0.301140E-02
    2018 1S   148  LEU  HN      1   0.310000       1.00800           0   0.00000     -0.301140E-02
    2019 1S   148  LEU  CA     22   0.700000E-01   12.0110           0   0.00000     -0.301140E-02
    2020 1S   148  LEU  HA      6   0.900000E-01   1.00800           0   0.00000     -0.301140E-02
    2021 1S   148  LEU  CB     23  -0.180000       12.0110           0   0.00000     -0.301140E-02
    2022 1S   148  LEU  HB1     3   0.900000E-01   1.00800           0   0.00000     -0.301140E-02
    2023 1S   148  LEU  HB2     3   0.900000E-01   1.00800           0   0.00000     -0.301140E-02
    2024 1S   148  LEU  CG     22  -0.900000E-01   12.0110           0   0.00000     -0.301140E-02
    2025 1S   148  LEU  HG      3   0.900000E-01   1.00800           0   0.00000     -0.301140E-02
    2026 1S   148  LEU  CD1    24  -0.270000       12.0110           0   0.00000     -0.301140E-02
    2027 1S   148  LEU  HD11    3   0.900000E-01   1.00800           0   0.00000     -0.301140E-02
    2028 1S   148  LEU  HD12    3   0.900000E-01   1.00800           0   0.00000     -0.301140E-02
    2029 1S   148  LEU  HD13    3   0.900000E-01   1.00800           0   0.00000     -0.301140E-02
    2030 1S   148  LEU  CD2    24  -0.270000       12.0110           0   0.00000     -0.301140E-02
    2031 1S   148  LEU  HD21    3   0.900000E-01   1.00800           0   0.00000     -0.301140E-02
    2032 1S   148  LEU  HD22    3   0.900000E-01   1.00800           0   0.00000     -0.301140E-02
    2033 1S   148  LEU  HD23    3   0.900000E-01   1.00800           0   0.00000     -0.301140E-02
    2034 1S   148  LEU  C      20   0.510000       12.0110           0   0.00000     -0.301140E-02
    2035 1S   148  LEU  O      70  -0.510000       15.9990           0   0.00000     -0.301140E-02
    2036 1S   149  ASN  N      54  -0.470000       14.0070           0   0.00000     -0.301140E-02
    2037 1S   149  ASN  HN      1   0.310000       1.00800           0   0.00000     -0.301140E-02
    2038 1S   149  ASN  CA     22   0.700000E-01   12.0110           0   0.00000     -0.301140E-02
    2039 1S   149  ASN  HA      6   0.900000E-01   1.00800           0   0.00000     -0.301140E-02
    2040 1S   149  ASN  CB     23  -0.180000       12.0110           0   0.00000     -0.301140E-02
    2041 1S   149  ASN  HB1     3   0.900000E-01   1.00800           0   0.00000     -0.301140E-02
    2042 1S   149  ASN  HB2     3   0.900000E-01   1.00800           0   0.00000     -0.301140E-02
    2043 1S   149  ASN  CG     32   0.550000       12.0110           0   0.00000     -0.301140E-02
    2044 1S   149  ASN  OD1    70  -0.550000       15.9990           0   0.00000     -0.301140E-02
    2045 1S   149  ASN  ND2    55  -0.620000       14.0070           0   0.00000     -0.301140E-02
    2046 1S   149  ASN  HD21    1   0.320000       1.00800           0   0.00000     -0.301140E-02
    2047 1S   149  ASN  HD22    1   0.300000       1.00800           0   0.00000     -0.301140E-02
    2048 1S   149  ASN  C      20   0.510000       12.0110           0   0.00000     -0.301140E-02
    2049 1S   149  ASN  O      70  -0.510000       15.9990           0   0.00000     -0.301140E-02
    2050 1S   150  GLU  N      54  -0.470000       14.0070           0   0.00000     -0.301140E-02
    2051 1S   150  GLU  HN      1   0.310000       1.00800           0   0.00000     -0.301140E-02
    2052 1S   150  GLU  CA     22   0.700000E-01   12.0110           0   0.00000     -0.301140E-02
    2053 1S   150  GLU  HA      6   0.900000E-01   1.00800           0   0.00000     -0.301140E-02
    2054 1S   150  GLU  CB     23  -0.180000       12.0110           0   0.00000     -0.301140E-02
    2055 1S   150  GLU  HB1     3   0.900000E-01   1.00800           0   0.00000     -0.301140E-02
    2056 1S   150  GLU  HB2     3   0.900000E-01   1.00800           0   0.00000     -0.301140E-02
    2057 1S   150  GLU  CG     23  -0.280000       12.0110           0   0.00000     -0.301140E-02
    2058 1S   150  GLU  HG1     3   0.900000E-01   1.00800           0   0.00000     -0.301140E-02
    2059 1S   150  GLU  HG2     3   0.900000E-01   1.00800           0   0.00000     -0.301140E-02
    2060 1S   150  GLU  CD     32   0.620000       12.0110           0   0.00000     -0.301140E-02
    2061 1S   150  GLU  OE1    72  -0.760000       15.9990           0   0.00000     -0.301140E-02
    2062 1S   150  GLU  OE2    72  -0.760000       15.9990           0   0.00000     -0.301140E-02
    2063 1S   150  GLU  C      20   0.510000       12.0110           0   0.00000     -0.301140E-02
    2064 1S   150  GLU  O      70  -0.510000       15.9990           0   0.00000     -0.301140E-02
    2065 1S   151  ILE  N      54  -0.470000       14.0070           0   0.00000     -0.301140E-02
    2066 1S   151  ILE  HN      1   0.310000       1.00800           0   0.00000     -0.301140E-02
    2067 1S   151  ILE  CA     22   0.700000E-01   12.0110           0   0.00000     -0.301140E-02
    2068 1S   151  ILE  HA      6   0.900000E-01   1.00800           0   0.00000     -0.301140E-02
    2069 1S   151  ILE  CB     22  -0.900000E-01   12.0110           0   0.00000     -0.301140E-02
    2070 1S   151  ILE  HB      3   0.900000E-01   1.00800           0   0.00000     -0.301140E-02
    2071 1S   151  ILE  CG2    24  -0.270000       12.0110           0   0.00000     -0.301140E-02
    2072 1S   151  ILE  HG21    3   0.900000E-01   1.00800           0   0.00000     -0.301140E-02
    2073 1S   151  ILE  HG22    3   0.900000E-01   1.00800           0   0.00000     -0.301140E-02
    2074 1S   151  ILE  HG23    3   0.900000E-01   1.00800           0   0.00000     -0.301140E-02
    2075 1S   151  ILE  CG1    23  -0.180000       12.0110           0   0.00000     -0.301140E-02
    2076 1S   151  ILE  HG11    3   0.900000E-01   1.00800           0   0.00000     -0.301140E-02
    2077 1S   151  ILE  HG12    3   0.900000E-01   1.00800           0   0.00000     -0.301140E-02
    2078 1S   151  ILE  CD     24  -0.270000       12.0110           0   0.00000     -0.301140E-02
    2079 1S   151  ILE  HD1     3   0.900000E-01   1.00800           0   0.00000     -0.301140E-02
    2080 1S   151  ILE  HD2     3   0.900000E-01   1.00800           0   0.00000     -0.301140E-02
    2081 1S   151  ILE  HD3     3   0.900000E-01   1.00800           0   0.00000     -0.301140E-02
    2082 1S   151  ILE  C      20   0.510000       12.0110           0   0.00000     -0.301140E-02
    2083 1S   151  ILE  O      70  -0.510000       15.9990           0   0.00000     -0.301140E-02
    2084 1S   152  MET  N      54  -0.470000       14.0070           0   0.00000     -0.301140E-02
    2085 1S   152  MET  HN      1   0.310000       1.00800           0   0.00000     -0.301140E-02
    2086 1S   152  MET  CA     22   0.700000E-01   12.0110           0   0.00000     -0.301140E-02
    2087 1S   152  MET  HA      6   0.900000E-01   1.00800           0   0.00000     -0.301140E-02
    2088 1S   152  MET  CB     23  -0.180000       12.0110           0   0.00000     -0.301140E-02
    2089 1S   152  MET  HB1     3   0.900000E-01   1.00800           0   0.00000     -0.301140E-02
    2090 1S   152  MET  HB2     3   0.900000E-01   1.00800           0   0.00000     -0.301140E-02
    2091 1S   152  MET  CG     23  -0.140000       12.0110           0   0.00000     -0.301140E-02
    2092 1S   152  MET  HG1     3   0.900000E-01   1.00800           0   0.00000     -0.301140E-02
    2093 1S   152  MET  HG2     3   0.900000E-01   1.00800           0   0.00000     -0.301140E-02
    2094 1S   152  MET  SD     81  -0.900000E-01   32.0600           0   0.00000     -0.301140E-02
    2095 1S   152  MET  CE     24  -0.220000       12.0110           0   0.00000     -0.301140E-02
    2096 1S   152  MET  HE1     3   0.900000E-01   1.00800           0   0.00000     -0.301140E-02
    2097 1S   152  MET  HE2     3   0.900000E-01   1.00800           0   0.00000     -0.301140E-02
    2098 1S   152  MET  HE3     3   0.900000E-01   1.00800           0   0.00000     -0.301140E-02
    2099 1S   152  MET  C      20   0.510000       12.0110           0   0.00000     -0.301140E-02
    2100 1S   152  MET  O      70  -0.510000       15.9990           0   0.00000     -0.301140E-02
    2101 1S   153  ALA  N      54  -0.470000       14.0070           0   0.00000     -0.301140E-02
    2102 1S   153  ALA  HN      1   0.310000       1.00800           0   0.00000     -0.301140E-02
    2103 1S   153  ALA  CA     22   0.700000E-01   12.0110           0   0.00000     -0.301140E-02
    2104 1S   153  ALA  HA      6   0.900000E-01   1.00800           0   0.00000     -0.301140E-02
    2105 1S   153  ALA  CB     24  -0.270000       12.0110           0   0.00000     -0.301140E-02
    2106 1S   153  ALA  HB1     3   0.900000E-01   1.00800           0   0.00000     -0.301140E-02
    2107 1S   153  ALA  HB2     3   0.900000E-01   1.00800           0   0.00000     -0.301140E-02
    2108 1S   153  ALA  HB3     3   0.900000E-01   1.00800           0   0.00000     -0.301140E-02
    2109 1S   153  ALA  C      20   0.510000       12.0110           0   0.00000     -0.301140E-02
    2110 1S   153  ALA  O      70  -0.510000       15.9990           0   0.00000     -0.301140E-02
    2111 1S   154  ASN  N      54  -0.470000       14.0070           0   0.00000     -0.301140E-02
    2112 1S   154  ASN  HN      1   0.310000       1.00800           0   0.00000     -0.301140E-02
    2113 1S   154  ASN  CA     22   0.700000E-01   12.0110           0   0.00000     -0.301140E-02
    2114 1S   154  ASN  HA      6   0.900000E-01   1.00800           0   0.00000     -0.301140E-02
    2115 1S   154  ASN  CB     23  -0.180000       12.0110           0   0.00000     -0.301140E-02
    2116 1S   154  ASN  HB1     3   0.900000E-01   1.00800           0   0.00000     -0.301140E-02
    2117 1S   154  ASN  HB2     3   0.900000E-01   1.00800           0   0.00000     -0.301140E-02
    2118 1S   154  ASN  CG     32   0.550000       12.0110           0   0.00000     -0.301140E-02
    2119 1S   154  ASN  OD1    70  -0.550000       15.9990           0   0.00000     -0.301140E-02
    2120 1S   154  ASN  ND2    55  -0.620000       14.0070           0   0.00000     -0.301140E-02
    2121 1S   154  ASN  HD21    1   0.320000       1.00800           0   0.00000     -0.301140E-02
    2122 1S   154  ASN  HD22    1   0.300000       1.00800           0   0.00000     -0.301140E-02
    2123 1S   154  ASN  C      20   0.510000       12.0110           0   0.00000     -0.301140E-02
    2124 1S   154  ASN  O      70  -0.510000       15.9990           0   0.00000     -0.301140E-02
    2125 1S   155  SER  N      54  -0.470000       14.0070           0   0.00000     -0.301140E-02
    2126 1S   155  SER  HN      1   0.310000       1.00800           0   0.00000     -0.301140E-02
    2127 1S   155  SER  CA     22   0.700000E-01   12.0110           0   0.00000     -0.301140E-02
    2128 1S   155  SER  HA      6   0.900000E-01   1.00800           0   0.00000     -0.301140E-02
    2129 1S   155  SER  CB     23   0.500000E-01   12.0110           0   0.00000     -0.301140E-02
    2130 1S   155  SER  HB1     3   0.900000E-01   1.00800           0   0.00000     -0.301140E-02
    2131 1S   155  SER  HB2     3   0.900000E-01   1.00800           0   0.00000     -0.301140E-02
    2132 1S   155  SER  OG     73  -0.660000       15.9990           0   0.00000     -0.301140E-02
    2133 1S   155  SER  HG1     1   0.430000       1.00800           0   0.00000     -0.301140E-02
    2134 1S   155  SER  C      20   0.510000       12.0110           0   0.00000     -0.301140E-02
    2135 1S   155  SER  O      70  -0.510000       15.9990           0   0.00000     -0.301140E-02
    2136 1S   156  LEU  N      54  -0.470000       14.0070           0   0.00000     -0.301140E-02
    2137 1S   156  LEU  HN      1   0.310000       1.00800           0   0.00000     -0.301140E-02
    2138 1S   156  LEU  CA     22   0.700000E-01   12.0110           0   0.00000     -0.301140E-02
    2139 1S   156  LEU  HA      6   0.900000E-01   1.00800           0   0.00000     -0.301140E-02
    2140 1S   156  LEU  CB     23  -0.180000       12.0110           0   0.00000     -0.301140E-02
    2141 1S   156  LEU  HB1     3   0.900000E-01   1.00800           0   0.00000     -0.301140E-02
    2142 1S   156  LEU  HB2     3   0.900000E-01   1.00800           0   0.00000     -0.301140E-02
    2143 1S   156  LEU  CG     22  -0.900000E-01   12.0110           0   0.00000     -0.301140E-02
    2144 1S   156  LEU  HG      3   0.900000E-01   1.00800           0   0.00000     -0.301140E-02
    2145 1S   156  LEU  CD1    24  -0.270000       12.0110           0   0.00000     -0.301140E-02
    2146 1S   156  LEU  HD11    3   0.900000E-01   1.00800           0   0.00000     -0.301140E-02
    2147 1S   156  LEU  HD12    3   0.900000E-01   1.00800           0   0.00000     -0.301140E-02
    2148 1S   156  LEU  HD13    3   0.900000E-01   1.00800           0   0.00000     -0.301140E-02
    2149 1S   156  LEU  CD2    24  -0.270000       12.0110           0   0.00000     -0.301140E-02
    2150 1S   156  LEU  HD21    3   0.900000E-01   1.00800           0   0.00000     -0.301140E-02
    2151 1S   156  LEU  HD22    3   0.900000E-01   1.00800           0   0.00000     -0.301140E-02
    2152 1S   156  LEU  HD23    3   0.900000E-01   1.00800           0   0.00000     -0.301140E-02
    2153 1S   156  LEU  C      20   0.510000       12.0110           0   0.00000     -0.301140E-02
    2154 1S   156  LEU  O      70  -0.510000       15.9990           0   0.00000     -0.301140E-02
    2155 1S   157  ASP  N      54  -0.470000       14.0070           0   0.00000     -0.301140E-02
    2156 1S   157  ASP  HN      1   0.310000       1.00800           0   0.00000     -0.301140E-02
    2157 1S   157  ASP  CA     22   0.700000E-01   12.0110           0   0.00000     -0.301140E-02
    2158 1S   157  ASP  HA      6   0.900000E-01   1.00800           0   0.00000     -0.301140E-02
    2159 1S   157  ASP  CB     23  -0.280000       12.0110           0   0.00000     -0.301140E-02
    2160 1S   157  ASP  HB1     3   0.900000E-01   1.00800           0   0.00000     -0.301140E-02
    2161 1S   157  ASP  HB2     3   0.900000E-01   1.00800           0   0.00000     -0.301140E-02
    2162 1S   157  ASP  CG     32   0.620000       12.0110           0   0.00000     -0.301140E-02
    2163 1S   157  ASP  OD1    72  -0.760000       15.9990           0   0.00000     -0.301140E-02
    2164 1S   157  ASP  OD2    72  -0.760000       15.9990           0   0.00000     -0.301140E-02
    2165 1S   157  ASP  C      20   0.510000       12.0110           0   0.00000     -0.301140E-02
    2166 1S   157  ASP  O      70  -0.510000       15.9990           0   0.00000     -0.301140E-02
    2167 1S   158  TYR  N      54  -0.470000       14.0070           0   0.00000     -0.301140E-02
    2168 1S   158  TYR  HN      1   0.310000       1.00800           0   0.00000     -0.301140E-02
    2169 1S   158  TYR  CA     22   0.700000E-01   12.0110           0   0.00000     -0.301140E-02
    2170 1S   158  TYR  HA      6   0.900000E-01   1.00800           0   0.00000     -0.301140E-02
    2171 1S   158  TYR  CB     23  -0.180000       12.0110           0   0.00000     -0.301140E-02
    2172 1S   158  TYR  HB1     3   0.900000E-01   1.00800           0   0.00000     -0.301140E-02
    2173 1S   158  TYR  HB2     3   0.900000E-01   1.00800           0   0.00000     -0.301140E-02
    2174 1S   158  TYR  CG     21    0.00000       12.0110           0   0.00000     -0.301140E-02
    2175 1S   158  TYR  CD1    21  -0.115000       12.0110           0   0.00000     -0.301140E-02
    2176 1S   158  TYR  HD1     5   0.115000       1.00800           0   0.00000     -0.301140E-02
    2177 1S   158  TYR  CE1    21  -0.115000       12.0110           0   0.00000     -0.301140E-02
    2178 1S   158  TYR  HE1     5   0.115000       1.00800           0   0.00000     -0.301140E-02
    2179 1S   158  TYR  CZ     21   0.110000       12.0110           0   0.00000     -0.301140E-02
    2180 1S   158  TYR  OH     73  -0.540000       15.9990           0   0.00000     -0.301140E-02
    2181 1S   158  TYR  HH      1   0.430000       1.00800           0   0.00000     -0.301140E-02
    2182 1S   158  TYR  CD2    21  -0.115000       12.0110           0   0.00000     -0.301140E-02
    2183 1S   158  TYR  HD2     5   0.115000       1.00800           0   0.00000     -0.301140E-02
    2184 1S   158  TYR  CE2    21  -0.115000       12.0110           0   0.00000     -0.301140E-02
    2185 1S   158  TYR  HE2     5   0.115000       1.00800           0   0.00000     -0.301140E-02
    2186 1S   158  TYR  C      20   0.510000       12.0110           0   0.00000     -0.301140E-02
    2187 1S   158  TYR  O      70  -0.510000       15.9990           0   0.00000     -0.301140E-02
    2188 1S   159  ASN  N      54  -0.470000       14.0070           0   0.00000     -0.301140E-02
    2189 1S   159  ASN  HN      1   0.310000       1.00800           0   0.00000     -0.301140E-02
    2190 1S   159  ASN  CA     22   0.700000E-01   12.0110           0   0.00000     -0.301140E-02
    2191 1S   159  ASN  HA      6   0.900000E-01   1.00800           0   0.00000     -0.301140E-02
    2192 1S   159  ASN  CB     23  -0.180000       12.0110           0   0.00000     -0.301140E-02
    2193 1S   159  ASN  HB1     3   0.900000E-01   1.00800           0   0.00000     -0.301140E-02
    2194 1S   159  ASN  HB2     3   0.900000E-01   1.00800           0   0.00000     -0.301140E-02
    2195 1S   159  ASN  CG     32   0.550000       12.0110           0   0.00000     -0.301140E-02
    2196 1S   159  ASN  OD1    70  -0.550000       15.9990           0   0.00000     -0.301140E-02
    2197 1S   159  ASN  ND2    55  -0.620000       14.0070           0   0.00000     -0.301140E-02
    2198 1S   159  ASN  HD21    1   0.320000       1.00800           0   0.00000     -0.301140E-02
    2199 1S   159  ASN  HD22    1   0.300000       1.00800           0   0.00000     -0.301140E-02
    2200 1S   159  ASN  C      20   0.510000       12.0110           0   0.00000     -0.301140E-02
    2201 1S   159  ASN  O      70  -0.510000       15.9990           0   0.00000     -0.301140E-02
    2202 1S   160  GLU  N      54  -0.470000       14.0070           0   0.00000     -0.301140E-02
    2203 1S   160  GLU  HN      1   0.310000       1.00800           0   0.00000     -0.301140E-02
    2204 1S   160  GLU  CA     22   0.700000E-01   12.0110           0   0.00000     -0.301140E-02
    2205 1S   160  GLU  HA      6   0.900000E-01   1.00800           0   0.00000     -0.301140E-02
    2206 1S   160  GLU  CB     23  -0.180000       12.0110           0   0.00000     -0.301140E-02
    2207 1S   160  GLU  HB1     3   0.900000E-01   1.00800           0   0.00000     -0.301140E-02
    2208 1S   160  GLU  HB2     3   0.900000E-01   1.00800           0   0.00000     -0.301140E-02
    2209 1S   160  GLU  CG     23  -0.280000       12.0110           0   0.00000     -0.301140E-02
    2210 1S   160  GLU  HG1     3   0.900000E-01   1.00800           0   0.00000     -0.301140E-02
    2211 1S   160  GLU  HG2     3   0.900000E-01   1.00800           0   0.00000     -0.301140E-02
    2212 1S   160  GLU  CD     32   0.620000       12.0110           0   0.00000     -0.301140E-02
    2213 1S   160  GLU  OE1    72  -0.760000       15.9990           0   0.00000     -0.301140E-02
    2214 1S   160  GLU  OE2    72  -0.760000       15.9990           0   0.00000     -0.301140E-02
    2215 1S   160  GLU  C      20   0.510000       12.0110           0   0.00000     -0.301140E-02
    2216 1S   160  GLU  O      70  -0.510000       15.9990           0   0.00000     -0.301140E-02
    2217 1S   161  ARG  N      54  -0.470000       14.0070           0   0.00000     -0.301140E-02
    2218 1S   161  ARG  HN      1   0.310000       1.00800           0   0.00000     -0.301140E-02
    2219 1S   161  ARG  CA     22   0.700000E-01   12.0110           0   0.00000     -0.301140E-02
    2220 1S   161  ARG  HA      6   0.900000E-01   1.00800           0   0.00000     -0.301140E-02
    2221 1S   161  ARG  CB     23  -0.180000       12.0110           0   0.00000     -0.301140E-02
    2222 1S   161  ARG  HB1     3   0.900000E-01   1.00800           0   0.00000     -0.301140E-02
    2223 1S   161  ARG  HB2     3   0.900000E-01   1.00800           0   0.00000     -0.301140E-02
    2224 1S   161  ARG  CG     23  -0.180000       12.0110           0   0.00000     -0.301140E-02
    2225 1S   161  ARG  HG1     3   0.900000E-01   1.00800           0   0.00000     -0.301140E-02
    2226 1S   161  ARG  HG2     3   0.900000E-01   1.00800           0   0.00000     -0.301140E-02
    2227 1S   161  ARG  CD     23   0.200000       12.0110           0   0.00000     -0.301140E-02
    2228 1S   161  ARG  HD1     3   0.900000E-01   1.00800           0   0.00000     -0.301140E-02
    2229 1S   161  ARG  HD2     3   0.900000E-01   1.00800           0   0.00000     -0.301140E-02
    2230 1S   161  ARG  NE     57  -0.700000       14.0070           0   0.00000     -0.301140E-02
    2231 1S   161  ARG  HE      2   0.440000       1.00800           0   0.00000     -0.301140E-02
    2232 1S   161  ARG  CZ     20   0.640000       12.0110           0   0.00000     -0.301140E-02
    2233 1S   161  ARG  NH1    57  -0.800000       14.0070           0   0.00000     -0.301140E-02
    2234 1S   161  ARG  HH11    2   0.460000       1.00800           0   0.00000     -0.301140E-02
    2235 1S   161  ARG  HH12    2   0.460000       1.00800           0   0.00000     -0.301140E-02
    2236 1S   161  ARG  NH2    57  -0.800000       14.0070           0   0.00000     -0.301140E-02
    2237 1S   161  ARG  HH21    2   0.460000       1.00800           0   0.00000     -0.301140E-02
    2238 1S   161  ARG  HH22    2   0.460000       1.00800           0   0.00000     -0.301140E-02
    2239 1S   161  ARG  C      20   0.510000       12.0110           0   0.00000     -0.301140E-02
    2240 1S   161  ARG  O      70  -0.510000       15.9990           0   0.00000     -0.301140E-02
    2241 1S   162  LEU  N      54  -0.470000       14.0070           0   0.00000     -0.301140E-02
    2242 1S   162  LEU  HN      1   0.310000       1.00800           0   0.00000     -0.301140E-02
    2243 1S   162  LEU  CA     22   0.700000E-01   12.0110           0   0.00000     -0.301140E-02
    2244 1S   162  LEU  HA      6   0.900000E-01   1.00800           0   0.00000     -0.301140E-02
    2245 1S   162  LEU  CB     23  -0.180000       12.0110           0   0.00000     -0.301140E-02
    2246 1S   162  LEU  HB1     3   0.900000E-01   1.00800           0   0.00000     -0.301140E-02
    2247 1S   162  LEU  HB2     3   0.900000E-01   1.00800           0   0.00000     -0.301140E-02
    2248 1S   162  LEU  CG     22  -0.900000E-01   12.0110           0   0.00000     -0.301140E-02
    2249 1S   162  LEU  HG      3   0.900000E-01   1.00800           0   0.00000     -0.301140E-02
    2250 1S   162  LEU  CD1    24  -0.270000       12.0110           0   0.00000     -0.301140E-02
    2251 1S   162  LEU  HD11    3   0.900000E-01   1.00800           0   0.00000     -0.301140E-02
    2252 1S   162  LEU  HD12    3   0.900000E-01   1.00800           0   0.00000     -0.301140E-02
    2253 1S   162  LEU  HD13    3   0.900000E-01   1.00800           0   0.00000     -0.301140E-02
    2254 1S   162  LEU  CD2    24  -0.270000       12.0110           0   0.00000     -0.301140E-02
    2255 1S   162  LEU  HD21    3   0.900000E-01   1.00800           0   0.00000     -0.301140E-02
    2256 1S   162  LEU  HD22    3   0.900000E-01   1.00800           0   0.00000     -0.301140E-02
    2257 1S   162  LEU  HD23    3   0.900000E-01   1.00800           0   0.00000     -0.301140E-02
    2258 1S   162  LEU  C      20   0.510000       12.0110           0   0.00000     -0.301140E-02
    2259 1S   162  LEU  O      70  -0.510000       15.9990           0   0.00000     -0.301140E-02
    2260 1S   163  TRP  N      54  -0.470000       14.0070           0   0.00000     -0.301140E-02
    2261 1S   163  TRP  HN      1   0.310000       1.00800           0   0.00000     -0.301140E-02
    2262 1S   163  TRP  CA     22   0.700000E-01   12.0110           0   0.00000     -0.301140E-02
    2263 1S   163  TRP  HA      6   0.900000E-01   1.00800           0   0.00000     -0.301140E-02
    2264 1S   163  TRP  CB     23  -0.180000       12.0110           0   0.00000     -0.301140E-02
    2265 1S   163  TRP  HB1     3   0.900000E-01   1.00800           0   0.00000     -0.301140E-02
    2266 1S   163  TRP  HB2     3   0.900000E-01   1.00800           0   0.00000     -0.301140E-02
    2267 1S   163  TRP  CG     28  -0.300000E-01   12.0110           0   0.00000     -0.301140E-02
    2268 1S   163  TRP  CD1    21   0.350000E-01   12.0110           0   0.00000     -0.301140E-02
    2269 1S   163  TRP  HD1     5   0.115000       1.00800           0   0.00000     -0.301140E-02
    2270 1S   163  TRP  NE1    58  -0.610000       14.0070           0   0.00000     -0.301140E-02
    2271 1S   163  TRP  HE1     1   0.380000       1.00800           0   0.00000     -0.301140E-02
    2272 1S   163  TRP  CE2    27   0.130000       12.0110           0   0.00000     -0.301140E-02
    2273 1S   163  TRP  CD2    27  -0.200000E-01   12.0110           0   0.00000     -0.301140E-02
    2274 1S   163  TRP  CE3    21  -0.115000       12.0110           0   0.00000     -0.301140E-02
    2275 1S   163  TRP  HE3     5   0.115000       1.00800           0   0.00000     -0.301140E-02
    2276 1S   163  TRP  CZ3    21  -0.115000       12.0110           0   0.00000     -0.301140E-02
    2277 1S   163  TRP  HZ3     5   0.115000       1.00800           0   0.00000     -0.301140E-02
    2278 1S   163  TRP  CZ2    21  -0.115000       12.0110           0   0.00000     -0.301140E-02
    2279 1S   163  TRP  HZ2     5   0.115000       1.00800           0   0.00000     -0.301140E-02
    2280 1S   163  TRP  CH2    21  -0.115000       12.0110           0   0.00000     -0.301140E-02
    2281 1S   163  TRP  HH2     5   0.115000       1.00800           0   0.00000     -0.301140E-02
    2282 1S   163  TRP  C      20   0.510000       12.0110           0   0.00000     -0.301140E-02
    2283 1S   163  TRP  O      70  -0.510000       15.9990           0   0.00000     -0.301140E-02
    2284 1S   164  ALA  N      54  -0.470000       14.0070           0   0.00000     -0.301140E-02
    2285 1S   164  ALA  HN      1   0.310000       1.00800           0   0.00000     -0.301140E-02
    2286 1S   164  ALA  CA     22   0.700000E-01   12.0110           0   0.00000     -0.301140E-02
    2287 1S   164  ALA  HA      6   0.900000E-01   1.00800           0   0.00000     -0.301140E-02
    2288 1S   164  ALA  CB     24  -0.270000       12.0110           0   0.00000     -0.301140E-02
    2289 1S   164  ALA  HB1     3   0.900000E-01   1.00800           0   0.00000     -0.301140E-02
    2290 1S   164  ALA  HB2     3   0.900000E-01   1.00800           0   0.00000     -0.301140E-02
    2291 1S   164  ALA  HB3     3   0.900000E-01   1.00800           0   0.00000     -0.301140E-02
    2292 1S   164  ALA  C      20   0.510000       12.0110           0   0.00000     -0.301140E-02
    2293 1S   164  ALA  O      70  -0.510000       15.9990           0   0.00000     -0.301140E-02
    2294 1S   165  TRP  N      54  -0.470000       14.0070           0   0.00000     -0.301140E-02
    2295 1S   165  TRP  HN      1   0.310000       1.00800           0   0.00000     -0.301140E-02
    2296 1S   165  TRP  CA     22   0.700000E-01   12.0110           0   0.00000     -0.301140E-02
    2297 1S   165  TRP  HA      6   0.900000E-01   1.00800           0   0.00000     -0.301140E-02
    2298 1S   165  TRP  CB     23  -0.180000       12.0110           0   0.00000     -0.301140E-02
    2299 1S   165  TRP  HB1     3   0.900000E-01   1.00800           0   0.00000     -0.301140E-02
    2300 1S   165  TRP  HB2     3   0.900000E-01   1.00800           0   0.00000     -0.301140E-02
    2301 1S   165  TRP  CG     28  -0.300000E-01   12.0110           0   0.00000     -0.301140E-02
    2302 1S   165  TRP  CD1    21   0.350000E-01   12.0110           0   0.00000     -0.301140E-02
    2303 1S   165  TRP  HD1     5   0.115000       1.00800           0   0.00000     -0.301140E-02
    2304 1S   165  TRP  NE1    58  -0.610000       14.0070           0   0.00000     -0.301140E-02
    2305 1S   165  TRP  HE1     1   0.380000       1.00800           0   0.00000     -0.301140E-02
    2306 1S   165  TRP  CE2    27   0.130000       12.0110           0   0.00000     -0.301140E-02
    2307 1S   165  TRP  CD2    27  -0.200000E-01   12.0110           0   0.00000     -0.301140E-02
    2308 1S   165  TRP  CE3    21  -0.115000       12.0110           0   0.00000     -0.301140E-02
    2309 1S   165  TRP  HE3     5   0.115000       1.00800           0   0.00000     -0.301140E-02
    2310 1S   165  TRP  CZ3    21  -0.115000       12.0110           0   0.00000     -0.301140E-02
    2311 1S   165  TRP  HZ3     5   0.115000       1.00800           0   0.00000     -0.301140E-02
    2312 1S   165  TRP  CZ2    21  -0.115000       12.0110           0   0.00000     -0.301140E-02
    2313 1S   165  TRP  HZ2     5   0.115000       1.00800           0   0.00000     -0.301140E-02
    2314 1S   165  TRP  CH2    21  -0.115000       12.0110           0   0.00000     -0.301140E-02
    2315 1S   165  TRP  HH2     5   0.115000       1.00800           0   0.00000     -0.301140E-02
    2316 1S   165  TRP  C      20   0.510000       12.0110           0   0.00000     -0.301140E-02
    2317 1S   165  TRP  O      70  -0.510000       15.9990           0   0.00000     -0.301140E-02
    2318 1S   166  GLU  N      54  -0.470000       14.0070           0   0.00000     -0.301140E-02
    2319 1S   166  GLU  HN      1   0.310000       1.00800           0   0.00000     -0.301140E-02
    2320 1S   166  GLU  CA     22   0.700000E-01   12.0110           0   0.00000     -0.301140E-02
    2321 1S   166  GLU  HA      6   0.900000E-01   1.00800           0   0.00000     -0.301140E-02
    2322 1S   166  GLU  CB     23  -0.180000       12.0110           0   0.00000     -0.301140E-02
    2323 1S   166  GLU  HB1     3   0.900000E-01   1.00800           0   0.00000     -0.301140E-02
    2324 1S   166  GLU  HB2     3   0.900000E-01   1.00800           0   0.00000     -0.301140E-02
    2325 1S   166  GLU  CG     23  -0.280000       12.0110           0   0.00000     -0.301140E-02
    2326 1S   166  GLU  HG1     3   0.900000E-01   1.00800           0   0.00000     -0.301140E-02
    2327 1S   166  GLU  HG2     3   0.900000E-01   1.00800           0   0.00000     -0.301140E-02
    2328 1S   166  GLU  CD     32   0.620000       12.0110           0   0.00000     -0.301140E-02
    2329 1S   166  GLU  OE1    72  -0.760000       15.9990           0   0.00000     -0.301140E-02
    2330 1S   166  GLU  OE2    72  -0.760000       15.9990           0   0.00000     -0.301140E-02
    2331 1S   166  GLU  C      20   0.510000       12.0110           0   0.00000     -0.301140E-02
    2332 1S   166  GLU  O      70  -0.510000       15.9990           0   0.00000     -0.301140E-02
    2333 1S   167  SER  N      54  -0.470000       14.0070           0   0.00000     -0.301140E-02
    2334 1S   167  SER  HN      1   0.310000       1.00800           0   0.00000     -0.301140E-02
    2335 1S   167  SER  CA     22   0.700000E-01   12.0110           0   0.00000     -0.301140E-02
    2336 1S   167  SER  HA      6   0.900000E-01   1.00800           0   0.00000     -0.301140E-02
    2337 1S   167  SER  CB     23   0.500000E-01   12.0110           0   0.00000     -0.301140E-02
    2338 1S   167  SER  HB1     3   0.900000E-01   1.00800           0   0.00000     -0.301140E-02
    2339 1S   167  SER  HB2     3   0.900000E-01   1.00800           0   0.00000     -0.301140E-02
    2340 1S   167  SER  OG     73  -0.660000       15.9990           0   0.00000     -0.301140E-02
    2341 1S   167  SER  HG1     1   0.430000       1.00800           0   0.00000     -0.301140E-02
    2342 1S   167  SER  C      20   0.510000       12.0110           0   0.00000     -0.301140E-02
    2343 1S   167  SER  O      70  -0.510000       15.9990           0   0.00000     -0.301140E-02
    2344 1S   168  TRP  N      54  -0.470000       14.0070           0   0.00000     -0.301140E-02
    2345 1S   168  TRP  HN      1   0.310000       1.00800           0   0.00000     -0.301140E-02
    2346 1S   168  TRP  CA     22   0.700000E-01   12.0110           0   0.00000     -0.301140E-02
    2347 1S   168  TRP  HA      6   0.900000E-01   1.00800           0   0.00000     -0.301140E-02
    2348 1S   168  TRP  CB     23  -0.180000       12.0110           0   0.00000     -0.301140E-02
    2349 1S   168  TRP  HB1     3   0.900000E-01   1.00800           0   0.00000     -0.301140E-02
    2350 1S   168  TRP  HB2     3   0.900000E-01   1.00800           0   0.00000     -0.301140E-02
    2351 1S   168  TRP  CG     28  -0.300000E-01   12.0110           0   0.00000     -0.301140E-02
    2352 1S   168  TRP  CD1    21   0.350000E-01   12.0110           0   0.00000     -0.301140E-02
    2353 1S   168  TRP  HD1     5   0.115000       1.00800           0   0.00000     -0.301140E-02
    2354 1S   168  TRP  NE1    58  -0.610000       14.0070           0   0.00000     -0.301140E-02
    2355 1S   168  TRP  HE1     1   0.380000       1.00800           0   0.00000     -0.301140E-02
    2356 1S   168  TRP  CE2    27   0.130000       12.0110           0   0.00000     -0.301140E-02
    2357 1S   168  TRP  CD2    27  -0.200000E-01   12.0110           0   0.00000     -0.301140E-02
    2358 1S   168  TRP  CE3    21  -0.115000       12.0110           0   0.00000     -0.301140E-02
    2359 1S   168  TRP  HE3     5   0.115000       1.00800           0   0.00000     -0.301140E-02
    2360 1S   168  TRP  CZ3    21  -0.115000       12.0110           0   0.00000     -0.301140E-02
    2361 1S   168  TRP  HZ3     5   0.115000       1.00800           0   0.00000     -0.301140E-02
    2362 1S   168  TRP  CZ2    21  -0.115000       12.0110           0   0.00000     -0.301140E-02
    2363 1S   168  TRP  HZ2     5   0.115000       1.00800           0   0.00000     -0.301140E-02
    2364 1S   168  TRP  CH2    21  -0.115000       12.0110           0   0.00000     -0.301140E-02
    2365 1S   168  TRP  HH2     5   0.115000       1.00800           0   0.00000     -0.301140E-02
    2366 1S   168  TRP  C      20   0.510000       12.0110           0   0.00000     -0.301140E-02
    2367 1S   168  TRP  O      70  -0.510000       15.9990           0   0.00000     -0.301140E-02
    2368 1S   169  ARG  N      54  -0.470000       14.0070           0   0.00000     -0.301140E-02
    2369 1S   169  ARG  HN      1   0.310000       1.00800           0   0.00000     -0.301140E-02
    2370 1S   169  ARG  CA     22   0.700000E-01   12.0110           0   0.00000     -0.301140E-02
    2371 1S   169  ARG  HA      6   0.900000E-01   1.00800           0   0.00000     -0.301140E-02
    2372 1S   169  ARG  CB     23  -0.180000       12.0110           0   0.00000     -0.301140E-02
    2373 1S   169  ARG  HB1     3   0.900000E-01   1.00800           0   0.00000     -0.301140E-02
    2374 1S   169  ARG  HB2     3   0.900000E-01   1.00800           0   0.00000     -0.301140E-02
    2375 1S   169  ARG  CG     23  -0.180000       12.0110           0   0.00000     -0.301140E-02
    2376 1S   169  ARG  HG1     3   0.900000E-01   1.00800           0   0.00000     -0.301140E-02
    2377 1S   169  ARG  HG2     3   0.900000E-01   1.00800           0   0.00000     -0.301140E-02
    2378 1S   169  ARG  CD     23   0.200000       12.0110           0   0.00000     -0.301140E-02
    2379 1S   169  ARG  HD1     3   0.900000E-01   1.00800           0   0.00000     -0.301140E-02
    2380 1S   169  ARG  HD2     3   0.900000E-01   1.00800           0   0.00000     -0.301140E-02
    2381 1S   169  ARG  NE     57  -0.700000       14.0070           0   0.00000     -0.301140E-02
    2382 1S   169  ARG  HE      2   0.440000       1.00800           0   0.00000     -0.301140E-02
    2383 1S   169  ARG  CZ     20   0.640000       12.0110           0   0.00000     -0.301140E-02
    2384 1S   169  ARG  NH1    57  -0.800000       14.0070           0   0.00000     -0.301140E-02
    2385 1S   169  ARG  HH11    2   0.460000       1.00800           0   0.00000     -0.301140E-02
    2386 1S   169  ARG  HH12    2   0.460000       1.00800           0   0.00000     -0.301140E-02
    2387 1S   169  ARG  NH2    57  -0.800000       14.0070           0   0.00000     -0.301140E-02
    2388 1S   169  ARG  HH21    2   0.460000       1.00800           0   0.00000     -0.301140E-02
    2389 1S   169  ARG  HH22    2   0.460000       1.00800           0   0.00000     -0.301140E-02
    2390 1S   169  ARG  C      20   0.510000       12.0110           0   0.00000     -0.301140E-02
    2391 1S   169  ARG  O      70  -0.510000       15.9990           0   0.00000     -0.301140E-02
    2392 1S   170  SER  N      54  -0.470000       14.0070           0   0.00000     -0.301140E-02
    2393 1S   170  SER  HN      1   0.310000       1.00800           0   0.00000     -0.301140E-02
    2394 1S   170  SER  CA     22   0.700000E-01   12.0110           0   0.00000     -0.301140E-02
    2395 1S   170  SER  HA      6   0.900000E-01   1.00800           0   0.00000     -0.301140E-02
    2396 1S   170  SER  CB     23   0.500000E-01   12.0110           0   0.00000     -0.301140E-02
    2397 1S   170  SER  HB1     3   0.900000E-01   1.00800           0   0.00000     -0.301140E-02
    2398 1S   170  SER  HB2     3   0.900000E-01   1.00800           0   0.00000     -0.301140E-02
    2399 1S   170  SER  OG     73  -0.660000       15.9990           0   0.00000     -0.301140E-02
    2400 1S   170  SER  HG1     1   0.430000       1.00800           0   0.00000     -0.301140E-02
    2401 1S   170  SER  C      20   0.510000       12.0110           0   0.00000     -0.301140E-02
    2402 1S   170  SER  O      70  -0.510000       15.9990           0   0.00000     -0.301140E-02
    2403 1S   171  GLU  N      54  -0.470000       14.0070           0   0.00000     -0.301140E-02
    2404 1S   171  GLU  HN      1   0.310000       1.00800           0   0.00000     -0.301140E-02
    2405 1S   171  GLU  CA     22   0.700000E-01   12.0110           0   0.00000     -0.301140E-02
    2406 1S   171  GLU  HA      6   0.900000E-01   1.00800           0   0.00000     -0.301140E-02
    2407 1S   171  GLU  CB     23  -0.180000       12.0110           0   0.00000     -0.301140E-02
    2408 1S   171  GLU  HB1     3   0.900000E-01   1.00800           0   0.00000     -0.301140E-02
    2409 1S   171  GLU  HB2     3   0.900000E-01   1.00800           0   0.00000     -0.301140E-02
    2410 1S   171  GLU  CG     23  -0.280000       12.0110           0   0.00000     -0.301140E-02
    2411 1S   171  GLU  HG1     3   0.900000E-01   1.00800           0   0.00000     -0.301140E-02
    2412 1S   171  GLU  HG2     3   0.900000E-01   1.00800           0   0.00000     -0.301140E-02
    2413 1S   171  GLU  CD     32   0.620000       12.0110           0   0.00000     -0.301140E-02
    2414 1S   171  GLU  OE1    72  -0.760000       15.9990           0   0.00000     -0.301140E-02
    2415 1S   171  GLU  OE2    72  -0.760000       15.9990           0   0.00000     -0.301140E-02
    2416 1S   171  GLU  C      20   0.510000       12.0110           0   0.00000     -0.301140E-02
    2417 1S   171  GLU  O      70  -0.510000       15.9990           0   0.00000     -0.301140E-02
    2418 1S   172  VAL  N      54  -0.470000       14.0070           0   0.00000     -0.301140E-02
    2419 1S   172  VAL  HN      1   0.310000       1.00800           0   0.00000     -0.301140E-02
    2420 1S   172  VAL  CA     22   0.700000E-01   12.0110           0   0.00000     -0.301140E-02
    2421 1S   172  VAL  HA      6   0.900000E-01   1.00800           0   0.00000     -0.301140E-02
    2422 1S   172  VAL  CB     22  -0.900000E-01   12.0110           0   0.00000     -0.301140E-02
    2423 1S   172  VAL  HB      3   0.900000E-01   1.00800           0   0.00000     -0.301140E-02
    2424 1S   172  VAL  CG1    24  -0.270000       12.0110           0   0.00000     -0.301140E-02
    2425 1S   172  VAL  HG11    3   0.900000E-01   1.00800           0   0.00000     -0.301140E-02
    2426 1S   172  VAL  HG12    3   0.900000E-01   1.00800           0   0.00000     -0.301140E-02
    2427 1S   172  VAL  HG13    3   0.900000E-01   1.00800           0   0.00000     -0.301140E-02
    2428 1S   172  VAL  CG2    24  -0.270000       12.0110           0   0.00000     -0.301140E-02
    2429 1S   172  VAL  HG21    3   0.900000E-01   1.00800           0   0.00000     -0.301140E-02
    2430 1S   172  VAL  HG22    3   0.900000E-01   1.00800           0   0.00000     -0.301140E-02
    2431 1S   172  VAL  HG23    3   0.900000E-01   1.00800           0   0.00000     -0.301140E-02
    2432 1S   172  VAL  C      20   0.510000       12.0110           0   0.00000     -0.301140E-02
    2433 1S   172  VAL  O      70  -0.510000       15.9990           0   0.00000     -0.301140E-02
    2434 1S   173  GLY  N      54  -0.470000       14.0070           0   0.00000     -0.301140E-02
    2435 1S   173  GLY  HN      1   0.310000       1.00800           0   0.00000     -0.301140E-02
    2436 1S   173  GLY  CA     23  -0.200000E-01   12.0110           0   0.00000     -0.301140E-02
    2437 1S   173  GLY  HA1     6   0.900000E-01   1.00800           0   0.00000     -0.301140E-02
    2438 1S   173  GLY  HA2     6   0.900000E-01   1.00800           0   0.00000     -0.301140E-02
    2439 1S   173  GLY  C      20   0.510000       12.0110           0   0.00000     -0.301140E-02
    2440 1S   173  GLY  O      70  -0.510000       15.9990           0   0.00000     -0.301140E-02
    2441 1S   174  LYS  N      54  -0.470000       14.0070           0   0.00000     -0.301140E-02
    2442 1S   174  LYS  HN      1   0.310000       1.00800           0   0.00000     -0.301140E-02
    2443 1S   174  LYS  CA     22   0.700000E-01   12.0110           0   0.00000     -0.301140E-02
    2444 1S   174  LYS  HA      6   0.900000E-01   1.00800           0   0.00000     -0.301140E-02
    2445 1S   174  LYS  CB     23  -0.180000       12.0110           0   0.00000     -0.301140E-02
    2446 1S   174  LYS  HB1     3   0.900000E-01   1.00800           0   0.00000     -0.301140E-02
    2447 1S   174  LYS  HB2     3   0.900000E-01   1.00800           0   0.00000     -0.301140E-02
    2448 1S   174  LYS  CG     23  -0.180000       12.0110           0   0.00000     -0.301140E-02
    2449 1S   174  LYS  HG1     3   0.900000E-01   1.00800           0   0.00000     -0.301140E-02
    2450 1S   174  LYS  HG2     3   0.900000E-01   1.00800           0   0.00000     -0.301140E-02
    2451 1S   174  LYS  CD     23  -0.180000       12.0110           0   0.00000     -0.301140E-02
    2452 1S   174  LYS  HD1     3   0.900000E-01   1.00800           0   0.00000     -0.301140E-02
    2453 1S   174  LYS  HD2     3   0.900000E-01   1.00800           0   0.00000     -0.301140E-02
    2454 1S   174  LYS  CE     23   0.210000       12.0110           0   0.00000     -0.301140E-02
    2455 1S   174  LYS  HE1     3   0.500000E-01   1.00800           0   0.00000     -0.301140E-02
    2456 1S   174  LYS  HE2     3   0.500000E-01   1.00800           0   0.00000     -0.301140E-02
    2457 1S   174  LYS  NZ     56  -0.300000       14.0070           0   0.00000     -0.301140E-02
    2458 1S   174  LYS  HZ1     2   0.330000       1.00800           0   0.00000     -0.301140E-02
    2459 1S   174  LYS  HZ2     2   0.330000       1.00800           0   0.00000     -0.301140E-02
    2460 1S   174  LYS  HZ3     2   0.330000       1.00800           0   0.00000     -0.301140E-02
    2461 1S   174  LYS  C      20   0.510000       12.0110           0   0.00000     -0.301140E-02
    2462 1S   174  LYS  O      70  -0.510000       15.9990           0   0.00000     -0.301140E-02
    2463 1S   175  GLN  N      54  -0.470000       14.0070           0   0.00000     -0.301140E-02
    2464 1S   175  GLN  HN      1   0.310000       1.00800           0   0.00000     -0.301140E-02
    2465 1S   175  GLN  CA     22   0.700000E-01   12.0110           0   0.00000     -0.301140E-02
    2466 1S   175  GLN  HA      6   0.900000E-01   1.00800           0   0.00000     -0.301140E-02
    2467 1S   175  GLN  CB     23  -0.180000       12.0110           0   0.00000     -0.301140E-02
    2468 1S   175  GLN  HB1     3   0.900000E-01   1.00800           0   0.00000     -0.301140E-02
    2469 1S   175  GLN  HB2     3   0.900000E-01   1.00800           0   0.00000     -0.301140E-02
    2470 1S   175  GLN  CG     23  -0.180000       12.0110           0   0.00000     -0.301140E-02
    2471 1S   175  GLN  HG1     3   0.900000E-01   1.00800           0   0.00000     -0.301140E-02
    2472 1S   175  GLN  HG2     3   0.900000E-01   1.00800           0   0.00000     -0.301140E-02
    2473 1S   175  GLN  CD     32   0.550000       12.0110           0   0.00000     -0.301140E-02
    2474 1S   175  GLN  OE1    70  -0.550000       15.9990           0   0.00000     -0.301140E-02
    2475 1S   175  GLN  NE2    55  -0.620000       14.0070           0   0.00000     -0.301140E-02
    2476 1S   175  GLN  HE21    1   0.320000       1.00800           0   0.00000     -0.301140E-02
    2477 1S   175  GLN  HE22    1   0.300000       1.00800           0   0.00000     -0.301140E-02
    2478 1S   175  GLN  C      20   0.510000       12.0110           0   0.00000     -0.301140E-02
    2479 1S   175  GLN  O      70  -0.510000       15.9990           0   0.00000     -0.301140E-02
    2480 1S   176  LEU  N      54  -0.470000       14.0070           0   0.00000     -0.301140E-02
    2481 1S   176  LEU  HN      1   0.310000       1.00800           0   0.00000     -0.301140E-02
    2482 1S   176  LEU  CA     22   0.700000E-01   12.0110           0   0.00000     -0.301140E-02
    2483 1S   176  LEU  HA      6   0.900000E-01   1.00800           0   0.00000     -0.301140E-02
    2484 1S   176  LEU  CB     23  -0.180000       12.0110           0   0.00000     -0.301140E-02
    2485 1S   176  LEU  HB1     3   0.900000E-01   1.00800           0   0.00000     -0.301140E-02
    2486 1S   176  LEU  HB2     3   0.900000E-01   1.00800           0   0.00000     -0.301140E-02
    2487 1S   176  LEU  CG     22  -0.900000E-01   12.0110           0   0.00000     -0.301140E-02
    2488 1S   176  LEU  HG      3   0.900000E-01   1.00800           0   0.00000     -0.301140E-02
    2489 1S   176  LEU  CD1    24  -0.270000       12.0110           0   0.00000     -0.301140E-02
    2490 1S   176  LEU  HD11    3   0.900000E-01   1.00800           0   0.00000     -0.301140E-02
    2491 1S   176  LEU  HD12    3   0.900000E-01   1.00800           0   0.00000     -0.301140E-02
    2492 1S   176  LEU  HD13    3   0.900000E-01   1.00800           0   0.00000     -0.301140E-02
    2493 1S   176  LEU  CD2    24  -0.270000       12.0110           0   0.00000     -0.301140E-02
    2494 1S   176  LEU  HD21    3   0.900000E-01   1.00800           0   0.00000     -0.301140E-02
    2495 1S   176  LEU  HD22    3   0.900000E-01   1.00800           0   0.00000     -0.301140E-02
    2496 1S   176  LEU  HD23    3   0.900000E-01   1.00800           0   0.00000     -0.301140E-02
    2497 1S   176  LEU  C      20   0.510000       12.0110           0   0.00000     -0.301140E-02
    2498 1S   176  LEU  O      70  -0.510000       15.9990           0   0.00000     -0.301140E-02
    2499 1S   177  ARG  N      54  -0.470000       14.0070           0   0.00000     -0.301140E-02
    2500 1S   177  ARG  HN      1   0.310000       1.00800           0   0.00000     -0.301140E-02
    2501 1S   177  ARG  CA     22   0.700000E-01   12.0110           0   0.00000     -0.301140E-02
    2502 1S   177  ARG  HA      6   0.900000E-01   1.00800           0   0.00000     -0.301140E-02
    2503 1S   177  ARG  CB     23  -0.180000       12.0110           0   0.00000     -0.301140E-02
    2504 1S   177  ARG  HB1     3   0.900000E-01   1.00800           0   0.00000     -0.301140E-02
    2505 1S   177  ARG  HB2     3   0.900000E-01   1.00800           0   0.00000     -0.301140E-02
    2506 1S   177  ARG  CG     23  -0.180000       12.0110           0   0.00000     -0.301140E-02
    2507 1S   177  ARG  HG1     3   0.900000E-01   1.00800           0   0.00000     -0.301140E-02
    2508 1S   177  ARG  HG2     3   0.900000E-01   1.00800           0   0.00000     -0.301140E-02
    2509 1S   177  ARG  CD     23   0.200000       12.0110           0   0.00000     -0.301140E-02
    2510 1S   177  ARG  HD1     3   0.900000E-01   1.00800           0   0.00000     -0.301140E-02
    2511 1S   177  ARG  HD2     3   0.900000E-01   1.00800           0   0.00000     -0.301140E-02
    2512 1S   177  ARG  NE     57  -0.700000       14.0070           0   0.00000     -0.301140E-02
    2513 1S   177  ARG  HE      2   0.440000       1.00800           0   0.00000     -0.301140E-02
    2514 1S   177  ARG  CZ     20   0.640000       12.0110           0   0.00000     -0.301140E-02
    2515 1S   177  ARG  NH1    57  -0.800000       14.0070           0   0.00000     -0.301140E-02
    2516 1S   177  ARG  HH11    2   0.460000       1.00800           0   0.00000     -0.301140E-02
    2517 1S   177  ARG  HH12    2   0.460000       1.00800           0   0.00000     -0.301140E-02
    2518 1S   177  ARG  NH2    57  -0.800000       14.0070           0   0.00000     -0.301140E-02
    2519 1S   177  ARG  HH21    2   0.460000       1.00800           0   0.00000     -0.301140E-02
    2520 1S   177  ARG  HH22    2   0.460000       1.00800           0   0.00000     -0.301140E-02
    2521 1S   177  ARG  C      20   0.510000       12.0110           0   0.00000     -0.301140E-02
    2522 1S   177  ARG  O      70  -0.510000       15.9990           0   0.00000     -0.301140E-02
    2523 1S   178  PRO  N      50  -0.290000       14.0070           0   0.00000     -0.301140E-02
    2524 1S   178  PRO  CD     31    0.00000       12.0110           0   0.00000     -0.301140E-02
    2525 1S   178  PRO  HD1     3   0.900000E-01   1.00800           0   0.00000     -0.301140E-02
    2526 1S   178  PRO  HD2     3   0.900000E-01   1.00800           0   0.00000     -0.301140E-02
    2527 1S   178  PRO  CA     29   0.200000E-01   12.0110           0   0.00000     -0.301140E-02
    2528 1S   178  PRO  HA      6   0.900000E-01   1.00800           0   0.00000     -0.301140E-02
    2529 1S   178  PRO  CB     30  -0.180000       12.0110           0   0.00000     -0.301140E-02
    2530 1S   178  PRO  HB1     3   0.900000E-01   1.00800           0   0.00000     -0.301140E-02
    2531 1S   178  PRO  HB2     3   0.900000E-01   1.00800           0   0.00000     -0.301140E-02
    2532 1S   178  PRO  CG     30  -0.180000       12.0110           0   0.00000     -0.301140E-02
    2533 1S   178  PRO  HG1     3   0.900000E-01   1.00800           0   0.00000     -0.301140E-02
    2534 1S   178  PRO  HG2     3   0.900000E-01   1.00800           0   0.00000     -0.301140E-02
    2535 1S   178  PRO  C      20   0.510000       12.0110           0   0.00000     -0.301140E-02
    2536 1S   178  PRO  O      70  -0.510000       15.9990           0   0.00000     -0.301140E-02
    2537 1S   179  LEU  N      54  -0.470000       14.0070           0   0.00000     -0.301140E-02
    2538 1S   179  LEU  HN      1   0.310000       1.00800           0   0.00000     -0.301140E-02
    2539 1S   179  LEU  CA     22   0.700000E-01   12.0110           0   0.00000     -0.301140E-02
    2540 1S   179  LEU  HA      6   0.900000E-01   1.00800           0   0.00000     -0.301140E-02
    2541 1S   179  LEU  CB     23  -0.180000       12.0110           0   0.00000     -0.301140E-02
    2542 1S   179  LEU  HB1     3   0.900000E-01   1.00800           0   0.00000     -0.301140E-02
    2543 1S   179  LEU  HB2     3   0.900000E-01   1.00800           0   0.00000     -0.301140E-02
    2544 1S   179  LEU  CG     22  -0.900000E-01   12.0110           0   0.00000     -0.301140E-02
    2545 1S   179  LEU  HG      3   0.900000E-01   1.00800           0   0.00000     -0.301140E-02
    2546 1S   179  LEU  CD1    24  -0.270000       12.0110           0   0.00000     -0.301140E-02
    2547 1S   179  LEU  HD11    3   0.900000E-01   1.00800           0   0.00000     -0.301140E-02
    2548 1S   179  LEU  HD12    3   0.900000E-01   1.00800           0   0.00000     -0.301140E-02
    2549 1S   179  LEU  HD13    3   0.900000E-01   1.00800           0   0.00000     -0.301140E-02
    2550 1S   179  LEU  CD2    24  -0.270000       12.0110           0   0.00000     -0.301140E-02
    2551 1S   179  LEU  HD21    3   0.900000E-01   1.00800           0   0.00000     -0.301140E-02
    2552 1S   179  LEU  HD22    3   0.900000E-01   1.00800           0   0.00000     -0.301140E-02
    2553 1S   179  LEU  HD23    3   0.900000E-01   1.00800           0   0.00000     -0.301140E-02
    2554 1S   179  LEU  C      20   0.510000       12.0110           0   0.00000     -0.301140E-02
    2555 1S   179  LEU  O      70  -0.510000       15.9990           0   0.00000     -0.301140E-02
    2556 1S   180  TYR  N      54  -0.470000       14.0070           0   0.00000     -0.301140E-02
    2557 1S   180  TYR  HN      1   0.310000       1.00800           0   0.00000     -0.301140E-02
    2558 1S   180  TYR  CA     22   0.700000E-01   12.0110           0   0.00000     -0.301140E-02
    2559 1S   180  TYR  HA      6   0.900000E-01   1.00800           0   0.00000     -0.301140E-02
    2560 1S   180  TYR  CB     23  -0.180000       12.0110           0   0.00000     -0.301140E-02
    2561 1S   180  TYR  HB1     3   0.900000E-01   1.00800           0   0.00000     -0.301140E-02
    2562 1S   180  TYR  HB2     3   0.900000E-01   1.00800           0   0.00000     -0.301140E-02
    2563 1S   180  TYR  CG     21    0.00000       12.0110           0   0.00000     -0.301140E-02
    2564 1S   180  TYR  CD1    21  -0.115000       12.0110           0   0.00000     -0.301140E-02
    2565 1S   180  TYR  HD1     5   0.115000       1.00800           0   0.00000     -0.301140E-02
    2566 1S   180  TYR  CE1    21  -0.115000       12.0110           0   0.00000     -0.301140E-02
    2567 1S   180  TYR  HE1     5   0.115000       1.00800           0   0.00000     -0.301140E-02
    2568 1S   180  TYR  CZ     21   0.110000       12.0110           0   0.00000     -0.301140E-02
    2569 1S   180  TYR  OH     73  -0.540000       15.9990           0   0.00000     -0.301140E-02
    2570 1S   180  TYR  HH      1   0.430000       1.00800           0   0.00000     -0.301140E-02
    2571 1S   180  TYR  CD2    21  -0.115000       12.0110           0   0.00000     -0.301140E-02
    2572 1S   180  TYR  HD2     5   0.115000       1.00800           0   0.00000     -0.301140E-02
    2573 1S   180  TYR  CE2    21  -0.115000       12.0110           0   0.00000     -0.301140E-02
    2574 1S   180  TYR  HE2     5   0.115000       1.00800           0   0.00000     -0.301140E-02
    2575 1S   180  TYR  C      20   0.510000       12.0110           0   0.00000     -0.301140E-02
    2576 1S   180  TYR  O      70  -0.510000       15.9990           0   0.00000     -0.301140E-02
    2577 1S   181  GLU  N      54  -0.470000       14.0070           0   0.00000     -0.301140E-02
    2578 1S   181  GLU  HN      1   0.310000       1.00800           0   0.00000     -0.301140E-02
    2579 1S   181  GLU  CA     22   0.700000E-01   12.0110           0   0.00000     -0.301140E-02
    2580 1S   181  GLU  HA      6   0.900000E-01   1.00800           0   0.00000     -0.301140E-02
    2581 1S   181  GLU  CB     23  -0.180000       12.0110           0   0.00000     -0.301140E-02
    2582 1S   181  GLU  HB1     3   0.900000E-01   1.00800           0   0.00000     -0.301140E-02
    2583 1S   181  GLU  HB2     3   0.900000E-01   1.00800           0   0.00000     -0.301140E-02
    2584 1S   181  GLU  CG     23  -0.280000       12.0110           0   0.00000     -0.301140E-02
    2585 1S   181  GLU  HG1     3   0.900000E-01   1.00800           0   0.00000     -0.301140E-02
    2586 1S   181  GLU  HG2     3   0.900000E-01   1.00800           0   0.00000     -0.301140E-02
    2587 1S   181  GLU  CD     32   0.620000       12.0110           0   0.00000     -0.301140E-02
    2588 1S   181  GLU  OE1    72  -0.760000       15.9990           0   0.00000     -0.301140E-02
    2589 1S   181  GLU  OE2    72  -0.760000       15.9990           0   0.00000     -0.301140E-02
    2590 1S   181  GLU  C      20   0.510000       12.0110           0   0.00000     -0.301140E-02
    2591 1S   181  GLU  O      70  -0.510000       15.9990           0   0.00000     -0.301140E-02
    2592 1S   182  GLU  N      54  -0.470000       14.0070           0   0.00000     -0.301140E-02
    2593 1S   182  GLU  HN      1   0.310000       1.00800           0   0.00000     -0.301140E-02
    2594 1S   182  GLU  CA     22   0.700000E-01   12.0110           0   0.00000     -0.301140E-02
    2595 1S   182  GLU  HA      6   0.900000E-01   1.00800           0   0.00000     -0.301140E-02
    2596 1S   182  GLU  CB     23  -0.180000       12.0110           0   0.00000     -0.301140E-02
    2597 1S   182  GLU  HB1     3   0.900000E-01   1.00800           0   0.00000     -0.301140E-02
    2598 1S   182  GLU  HB2     3   0.900000E-01   1.00800           0   0.00000     -0.301140E-02
    2599 1S   182  GLU  CG     23  -0.280000       12.0110           0   0.00000     -0.301140E-02
    2600 1S   182  GLU  HG1     3   0.900000E-01   1.00800           0   0.00000     -0.301140E-02
    2601 1S   182  GLU  HG2     3   0.900000E-01   1.00800           0   0.00000     -0.301140E-02
    2602 1S   182  GLU  CD     32   0.620000       12.0110           0   0.00000     -0.301140E-02
    2603 1S   182  GLU  OE1    72  -0.760000       15.9990           0   0.00000     -0.301140E-02
    2604 1S   182  GLU  OE2    72  -0.760000       15.9990           0   0.00000     -0.301140E-02
    2605 1S   182  GLU  C      20   0.510000       12.0110           0   0.00000     -0.301140E-02
    2606 1S   182  GLU  O      70  -0.510000       15.9990           0   0.00000     -0.301140E-02
    2607 1S   183  TYR  N      54  -0.470000       14.0070           0   0.00000     -0.301140E-02
    2608 1S   183  TYR  HN      1   0.310000       1.00800           0   0.00000     -0.301140E-02
    2609 1S   183  TYR  CA     22   0.700000E-01   12.0110           0   0.00000     -0.301140E-02
    2610 1S   183  TYR  HA      6   0.900000E-01   1.00800           0   0.00000     -0.301140E-02
    2611 1S   183  TYR  CB     23  -0.180000       12.0110           0   0.00000     -0.301140E-02
    2612 1S   183  TYR  HB1     3   0.900000E-01   1.00800           0   0.00000     -0.301140E-02
    2613 1S   183  TYR  HB2     3   0.900000E-01   1.00800           0   0.00000     -0.301140E-02
    2614 1S   183  TYR  CG     21    0.00000       12.0110           0   0.00000     -0.301140E-02
    2615 1S   183  TYR  CD1    21  -0.115000       12.0110           0   0.00000     -0.301140E-02
    2616 1S   183  TYR  HD1     5   0.115000       1.00800           0   0.00000     -0.301140E-02
    2617 1S   183  TYR  CE1    21  -0.115000       12.0110           0   0.00000     -0.301140E-02
    2618 1S   183  TYR  HE1     5   0.115000       1.00800           0   0.00000     -0.301140E-02
    2619 1S   183  TYR  CZ     21   0.110000       12.0110           0   0.00000     -0.301140E-02
    2620 1S   183  TYR  OH     73  -0.540000       15.9990           0   0.00000     -0.301140E-02
    2621 1S   183  TYR  HH      1   0.430000       1.00800           0   0.00000     -0.301140E-02
    2622 1S   183  TYR  CD2    21  -0.115000       12.0110           0   0.00000     -0.301140E-02
    2623 1S   183  TYR  HD2     5   0.115000       1.00800           0   0.00000     -0.301140E-02
    2624 1S   183  TYR  CE2    21  -0.115000       12.0110           0   0.00000     -0.301140E-02
    2625 1S   183  TYR  HE2     5   0.115000       1.00800           0   0.00000     -0.301140E-02
    2626 1S   183  TYR  C      20   0.510000       12.0110           0   0.00000     -0.301140E-02
    2627 1S   183  TYR  O      70  -0.510000       15.9990           0   0.00000     -0.301140E-02
    2628 1S   184  VAL  N      54  -0.470000       14.0070           0   0.00000     -0.301140E-02
    2629 1S   184  VAL  HN      1   0.310000       1.00800           0   0.00000     -0.301140E-02
    2630 1S   184  VAL  CA     22   0.700000E-01   12.0110           0   0.00000     -0.301140E-02
    2631 1S   184  VAL  HA      6   0.900000E-01   1.00800           0   0.00000     -0.301140E-02
    2632 1S   184  VAL  CB     22  -0.900000E-01   12.0110           0   0.00000     -0.301140E-02
    2633 1S   184  VAL  HB      3   0.900000E-01   1.00800           0   0.00000     -0.301140E-02
    2634 1S   184  VAL  CG1    24  -0.270000       12.0110           0   0.00000     -0.301140E-02
    2635 1S   184  VAL  HG11    3   0.900000E-01   1.00800           0   0.00000     -0.301140E-02
    2636 1S   184  VAL  HG12    3   0.900000E-01   1.00800           0   0.00000     -0.301140E-02
    2637 1S   184  VAL  HG13    3   0.900000E-01   1.00800           0   0.00000     -0.301140E-02
    2638 1S   184  VAL  CG2    24  -0.270000       12.0110           0   0.00000     -0.301140E-02
    2639 1S   184  VAL  HG21    3   0.900000E-01   1.00800           0   0.00000     -0.301140E-02
    2640 1S   184  VAL  HG22    3   0.900000E-01   1.00800           0   0.00000     -0.301140E-02
    2641 1S   184  VAL  HG23    3   0.900000E-01   1.00800           0   0.00000     -0.301140E-02
    2642 1S   184  VAL  C      20   0.510000       12.0110           0   0.00000     -0.301140E-02
    2643 1S   184  VAL  O      70  -0.510000       15.9990           0   0.00000     -0.301140E-02
    2644 1S   185  VAL  N      54  -0.470000       14.0070           0   0.00000     -0.301140E-02
    2645 1S   185  VAL  HN      1   0.310000       1.00800           0   0.00000     -0.301140E-02
    2646 1S   185  VAL  CA     22   0.700000E-01   12.0110           0   0.00000     -0.301140E-02
    2647 1S   185  VAL  HA      6   0.900000E-01   1.00800           0   0.00000     -0.301140E-02
    2648 1S   185  VAL  CB     22  -0.900000E-01   12.0110           0   0.00000     -0.301140E-02
    2649 1S   185  VAL  HB      3   0.900000E-01   1.00800           0   0.00000     -0.301140E-02
    2650 1S   185  VAL  CG1    24  -0.270000       12.0110           0   0.00000     -0.301140E-02
    2651 1S   185  VAL  HG11    3   0.900000E-01   1.00800           0   0.00000     -0.301140E-02
    2652 1S   185  VAL  HG12    3   0.900000E-01   1.00800           0   0.00000     -0.301140E-02
    2653 1S   185  VAL  HG13    3   0.900000E-01   1.00800           0   0.00000     -0.301140E-02
    2654 1S   185  VAL  CG2    24  -0.270000       12.0110           0   0.00000     -0.301140E-02
    2655 1S   185  VAL  HG21    3   0.900000E-01   1.00800           0   0.00000     -0.301140E-02
    2656 1S   185  VAL  HG22    3   0.900000E-01   1.00800           0   0.00000     -0.301140E-02
    2657 1S   185  VAL  HG23    3   0.900000E-01   1.00800           0   0.00000     -0.301140E-02
    2658 1S   185  VAL  C      20   0.510000       12.0110           0   0.00000     -0.301140E-02
    2659 1S   185  VAL  O      70  -0.510000       15.9990           0   0.00000     -0.301140E-02
    2660 1S   186  LEU  N      54  -0.470000       14.0070           0   0.00000     -0.301140E-02
    2661 1S   186  LEU  HN      1   0.310000       1.00800           0   0.00000     -0.301140E-02
    2662 1S   186  LEU  CA     22   0.700000E-01   12.0110           0   0.00000     -0.301140E-02
    2663 1S   186  LEU  HA      6   0.900000E-01   1.00800           0   0.00000     -0.301140E-02
    2664 1S   186  LEU  CB     23  -0.180000       12.0110           0   0.00000     -0.301140E-02
    2665 1S   186  LEU  HB1     3   0.900000E-01   1.00800           0   0.00000     -0.301140E-02
    2666 1S   186  LEU  HB2     3   0.900000E-01   1.00800           0   0.00000     -0.301140E-02
    2667 1S   186  LEU  CG     22  -0.900000E-01   12.0110           0   0.00000     -0.301140E-02
    2668 1S   186  LEU  HG      3   0.900000E-01   1.00800           0   0.00000     -0.301140E-02
    2669 1S   186  LEU  CD1    24  -0.270000       12.0110           0   0.00000     -0.301140E-02
    2670 1S   186  LEU  HD11    3   0.900000E-01   1.00800           0   0.00000     -0.301140E-02
    2671 1S   186  LEU  HD12    3   0.900000E-01   1.00800           0   0.00000     -0.301140E-02
    2672 1S   186  LEU  HD13    3   0.900000E-01   1.00800           0   0.00000     -0.301140E-02
    2673 1S   186  LEU  CD2    24  -0.270000       12.0110           0   0.00000     -0.301140E-02
    2674 1S   186  LEU  HD21    3   0.900000E-01   1.00800           0   0.00000     -0.301140E-02
    2675 1S   186  LEU  HD22    3   0.900000E-01   1.00800           0   0.00000     -0.301140E-02
    2676 1S   186  LEU  HD23    3   0.900000E-01   1.00800           0   0.00000     -0.301140E-02
    2677 1S   186  LEU  C      20   0.510000       12.0110           0   0.00000     -0.301140E-02
    2678 1S   186  LEU  O      70  -0.510000       15.9990           0   0.00000     -0.301140E-02
    2679 1S   187  LYS  N      54  -0.470000       14.0070           0   0.00000     -0.301140E-02
    2680 1S   187  LYS  HN      1   0.310000       1.00800           0   0.00000     -0.301140E-02
    2681 1S   187  LYS  CA     22   0.700000E-01   12.0110           0   0.00000     -0.301140E-02
    2682 1S   187  LYS  HA      6   0.900000E-01   1.00800           0   0.00000     -0.301140E-02
    2683 1S   187  LYS  CB     23  -0.180000       12.0110           0   0.00000     -0.301140E-02
    2684 1S   187  LYS  HB1     3   0.900000E-01   1.00800           0   0.00000     -0.301140E-02
    2685 1S   187  LYS  HB2     3   0.900000E-01   1.00800           0   0.00000     -0.301140E-02
    2686 1S   187  LYS  CG     23  -0.180000       12.0110           0   0.00000     -0.301140E-02
    2687 1S   187  LYS  HG1     3   0.900000E-01   1.00800           0   0.00000     -0.301140E-02
    2688 1S   187  LYS  HG2     3   0.900000E-01   1.00800           0   0.00000     -0.301140E-02
    2689 1S   187  LYS  CD     23  -0.180000       12.0110           0   0.00000     -0.301140E-02
    2690 1S   187  LYS  HD1     3   0.900000E-01   1.00800           0   0.00000     -0.301140E-02
    2691 1S   187  LYS  HD2     3   0.900000E-01   1.00800           0   0.00000     -0.301140E-02
    2692 1S   187  LYS  CE     23   0.210000       12.0110           0   0.00000     -0.301140E-02
    2693 1S   187  LYS  HE1     3   0.500000E-01   1.00800           0   0.00000     -0.301140E-02
    2694 1S   187  LYS  HE2     3   0.500000E-01   1.00800           0   0.00000     -0.301140E-02
    2695 1S   187  LYS  NZ     56  -0.300000       14.0070           0   0.00000     -0.301140E-02
    2696 1S   187  LYS  HZ1     2   0.330000       1.00800           0   0.00000     -0.301140E-02
    2697 1S   187  LYS  HZ2     2   0.330000       1.00800           0   0.00000     -0.301140E-02
    2698 1S   187  LYS  HZ3     2   0.330000       1.00800           0   0.00000     -0.301140E-02
    2699 1S   187  LYS  C      20   0.510000       12.0110           0   0.00000     -0.301140E-02
    2700 1S   187  LYS  O      70  -0.510000       15.9990           0   0.00000     -0.301140E-02
    2701 1S   188  ASN  N      54  -0.470000       14.0070           0   0.00000     -0.301140E-02
    2702 1S   188  ASN  HN      1   0.310000       1.00800           0   0.00000     -0.301140E-02
    2703 1S   188  ASN  CA     22   0.700000E-01   12.0110           0   0.00000     -0.301140E-02
    2704 1S   188  ASN  HA      6   0.900000E-01   1.00800           0   0.00000     -0.301140E-02
    2705 1S   188  ASN  CB     23  -0.180000       12.0110           0   0.00000     -0.301140E-02
    2706 1S   188  ASN  HB1     3   0.900000E-01   1.00800           0   0.00000     -0.301140E-02
    2707 1S   188  ASN  HB2     3   0.900000E-01   1.00800           0   0.00000     -0.301140E-02
    2708 1S   188  ASN  CG     32   0.550000       12.0110           0   0.00000     -0.301140E-02
    2709 1S   188  ASN  OD1    70  -0.550000       15.9990           0   0.00000     -0.301140E-02
    2710 1S   188  ASN  ND2    55  -0.620000       14.0070           0   0.00000     -0.301140E-02
    2711 1S   188  ASN  HD21    1   0.320000       1.00800           0   0.00000     -0.301140E-02
    2712 1S   188  ASN  HD22    1   0.300000       1.00800           0   0.00000     -0.301140E-02
    2713 1S   188  ASN  C      20   0.510000       12.0110           0   0.00000     -0.301140E-02
    2714 1S   188  ASN  O      70  -0.510000       15.9990           0   0.00000     -0.301140E-02
    2715 1S   189  GLU  N      54  -0.470000       14.0070           0   0.00000     -0.301140E-02
    2716 1S   189  GLU  HN      1   0.310000       1.00800           0   0.00000     -0.301140E-02
    2717 1S   189  GLU  CA     22   0.700000E-01   12.0110           0   0.00000     -0.301140E-02
    2718 1S   189  GLU  HA      6   0.900000E-01   1.00800           0   0.00000     -0.301140E-02
    2719 1S   189  GLU  CB     23  -0.180000       12.0110           0   0.00000     -0.301140E-02
    2720 1S   189  GLU  HB1     3   0.900000E-01   1.00800           0   0.00000     -0.301140E-02
    2721 1S   189  GLU  HB2     3   0.900000E-01   1.00800           0   0.00000     -0.301140E-02
    2722 1S   189  GLU  CG     23  -0.280000       12.0110           0   0.00000     -0.301140E-02
    2723 1S   189  GLU  HG1     3   0.900000E-01   1.00800           0   0.00000     -0.301140E-02
    2724 1S   189  GLU  HG2     3   0.900000E-01   1.00800           0   0.00000     -0.301140E-02
    2725 1S   189  GLU  CD     32   0.620000       12.0110           0   0.00000     -0.301140E-02
    2726 1S   189  GLU  OE1    72  -0.760000       15.9990           0   0.00000     -0.301140E-02
    2727 1S   189  GLU  OE2    72  -0.760000       15.9990           0   0.00000     -0.301140E-02
    2728 1S   189  GLU  C      20   0.510000       12.0110           0   0.00000     -0.301140E-02
    2729 1S   189  GLU  O      70  -0.510000       15.9990           0   0.00000     -0.301140E-02
    2730 1S   190  MET  N      54  -0.470000       14.0070           0   0.00000     -0.301140E-02
    2731 1S   190  MET  HN      1   0.310000       1.00800           0   0.00000     -0.301140E-02
    2732 1S   190  MET  CA     22   0.700000E-01   12.0110           0   0.00000     -0.301140E-02
    2733 1S   190  MET  HA      6   0.900000E-01   1.00800           0   0.00000     -0.301140E-02
    2734 1S   190  MET  CB     23  -0.180000       12.0110           0   0.00000     -0.301140E-02
    2735 1S   190  MET  HB1     3   0.900000E-01   1.00800           0   0.00000     -0.301140E-02
    2736 1S   190  MET  HB2     3   0.900000E-01   1.00800           0   0.00000     -0.301140E-02
    2737 1S   190  MET  CG     23  -0.140000       12.0110           0   0.00000     -0.301140E-02
    2738 1S   190  MET  HG1     3   0.900000E-01   1.00800           0   0.00000     -0.301140E-02
    2739 1S   190  MET  HG2     3   0.900000E-01   1.00800           0   0.00000     -0.301140E-02
    2740 1S   190  MET  SD     81  -0.900000E-01   32.0600           0   0.00000     -0.301140E-02
    2741 1S   190  MET  CE     24  -0.220000       12.0110           0   0.00000     -0.301140E-02
    2742 1S   190  MET  HE1     3   0.900000E-01   1.00800           0   0.00000     -0.301140E-02
    2743 1S   190  MET  HE2     3   0.900000E-01   1.00800           0   0.00000     -0.301140E-02
    2744 1S   190  MET  HE3     3   0.900000E-01   1.00800           0   0.00000     -0.301140E-02
    2745 1S   190  MET  C      20   0.510000       12.0110           0   0.00000     -0.301140E-02
    2746 1S   190  MET  O      70  -0.510000       15.9990           0   0.00000     -0.301140E-02
    2747 1S   191  ALA  N      54  -0.470000       14.0070           0   0.00000     -0.301140E-02
    2748 1S   191  ALA  HN      1   0.310000       1.00800           0   0.00000     -0.301140E-02
    2749 1S   191  ALA  CA     22   0.700000E-01   12.0110           0   0.00000     -0.301140E-02
    2750 1S   191  ALA  HA      6   0.900000E-01   1.00800           0   0.00000     -0.301140E-02
    2751 1S   191  ALA  CB     24  -0.270000       12.0110           0   0.00000     -0.301140E-02
    2752 1S   191  ALA  HB1     3   0.900000E-01   1.00800           0   0.00000     -0.301140E-02
    2753 1S   191  ALA  HB2     3   0.900000E-01   1.00800           0   0.00000     -0.301140E-02
    2754 1S   191  ALA  HB3     3   0.900000E-01   1.00800           0   0.00000     -0.301140E-02
    2755 1S   191  ALA  C      20   0.510000       12.0110           0   0.00000     -0.301140E-02
    2756 1S   191  ALA  O      70  -0.510000       15.9990           0   0.00000     -0.301140E-02
    2757 1S   192  ARG  N      54  -0.470000       14.0070           0   0.00000     -0.301140E-02
    2758 1S   192  ARG  HN      1   0.310000       1.00800           0   0.00000     -0.301140E-02
    2759 1S   192  ARG  CA     22   0.700000E-01   12.0110           0   0.00000     -0.301140E-02
    2760 1S   192  ARG  HA      6   0.900000E-01   1.00800           0   0.00000     -0.301140E-02
    2761 1S   192  ARG  CB     23  -0.180000       12.0110           0   0.00000     -0.301140E-02
    2762 1S   192  ARG  HB1     3   0.900000E-01   1.00800           0   0.00000     -0.301140E-02
    2763 1S   192  ARG  HB2     3   0.900000E-01   1.00800           0   0.00000     -0.301140E-02
    2764 1S   192  ARG  CG     23  -0.180000       12.0110           0   0.00000     -0.301140E-02
    2765 1S   192  ARG  HG1     3   0.900000E-01   1.00800           0   0.00000     -0.301140E-02
    2766 1S   192  ARG  HG2     3   0.900000E-01   1.00800           0   0.00000     -0.301140E-02
    2767 1S   192  ARG  CD     23   0.200000       12.0110           0   0.00000     -0.301140E-02
    2768 1S   192  ARG  HD1     3   0.900000E-01   1.00800           0   0.00000     -0.301140E-02
    2769 1S   192  ARG  HD2     3   0.900000E-01   1.00800           0   0.00000     -0.301140E-02
    2770 1S   192  ARG  NE     57  -0.700000       14.0070           0   0.00000     -0.301140E-02
    2771 1S   192  ARG  HE      2   0.440000       1.00800           0   0.00000     -0.301140E-02
    2772 1S   192  ARG  CZ     20   0.640000       12.0110           0   0.00000     -0.301140E-02
    2773 1S   192  ARG  NH1    57  -0.800000       14.0070           0   0.00000     -0.301140E-02
    2774 1S   192  ARG  HH11    2   0.460000       1.00800           0   0.00000     -0.301140E-02
    2775 1S   192  ARG  HH12    2   0.460000       1.00800           0   0.00000     -0.301140E-02
    2776 1S   192  ARG  NH2    57  -0.800000       14.0070           0   0.00000     -0.301140E-02
    2777 1S   192  ARG  HH21    2   0.460000       1.00800           0   0.00000     -0.301140E-02
    2778 1S   192  ARG  HH22    2   0.460000       1.00800           0   0.00000     -0.301140E-02
    2779 1S   192  ARG  C      20   0.510000       12.0110           0   0.00000     -0.301140E-02
    2780 1S   192  ARG  O      70  -0.510000       15.9990           0   0.00000     -0.301140E-02
    2781 1S   193  ALA  N      54  -0.470000       14.0070           0   0.00000     -0.301140E-02
    2782 1S   193  ALA  HN      1   0.310000       1.00800           0   0.00000     -0.301140E-02
    2783 1S   193  ALA  CA     22   0.700000E-01   12.0110           0   0.00000     -0.301140E-02
    2784 1S   193  ALA  HA      6   0.900000E-01   1.00800           0   0.00000     -0.301140E-02
    2785 1S   193  ALA  CB     24  -0.270000       12.0110           0   0.00000     -0.301140E-02
    2786 1S   193  ALA  HB1     3   0.900000E-01   1.00800           0   0.00000     -0.301140E-02
    2787 1S   193  ALA  HB2     3   0.900000E-01   1.00800           0   0.00000     -0.301140E-02
    2788 1S   193  ALA  HB3     3   0.900000E-01   1.00800           0   0.00000     -0.301140E-02
    2789 1S   193  ALA  C      20   0.510000       12.0110           0   0.00000     -0.301140E-02
    2790 1S   193  ALA  O      70  -0.510000       15.9990           0   0.00000     -0.301140E-02
    2791 1S   194  ASN  N      54  -0.470000       14.0070           0   0.00000     -0.301140E-02
    2792 1S   194  ASN  HN      1   0.310000       1.00800           0   0.00000     -0.301140E-02
    2793 1S   194  ASN  CA     22   0.700000E-01   12.0110           0   0.00000     -0.301140E-02
    2794 1S   194  ASN  HA      6   0.900000E-01   1.00800           0   0.00000     -0.301140E-02
    2795 1S   194  ASN  CB     23  -0.180000       12.0110           0   0.00000     -0.301140E-02
    2796 1S   194  ASN  HB1     3   0.900000E-01   1.00800           0   0.00000     -0.301140E-02
    2797 1S   194  ASN  HB2     3   0.900000E-01   1.00800           0   0.00000     -0.301140E-02
    2798 1S   194  ASN  CG     32   0.550000       12.0110           0   0.00000     -0.301140E-02
    2799 1S   194  ASN  OD1    70  -0.550000       15.9990           0   0.00000     -0.301140E-02
    2800 1S   194  ASN  ND2    55  -0.620000       14.0070           0   0.00000     -0.301140E-02
    2801 1S   194  ASN  HD21    1   0.320000       1.00800           0   0.00000     -0.301140E-02
    2802 1S   194  ASN  HD22    1   0.300000       1.00800           0   0.00000     -0.301140E-02
    2803 1S   194  ASN  C      20   0.510000       12.0110           0   0.00000     -0.301140E-02
    2804 1S   194  ASN  O      70  -0.510000       15.9990           0   0.00000     -0.301140E-02
    2805 1S   195  HSD  N      54  -0.470000       14.0070           0   0.00000     -0.301140E-02
    2806 1S   195  HSD  HN      1   0.310000       1.00800           0   0.00000     -0.301140E-02
    2807 1S   195  HSD  CA     22   0.700000E-01   12.0110           0   0.00000     -0.301140E-02
    2808 1S   195  HSD  HA      6   0.900000E-01   1.00800           0   0.00000     -0.301140E-02
    2809 1S   195  HSD  CB     23  -0.900000E-01   12.0110           0   0.00000     -0.301140E-02
    2810 1S   195  HSD  HB1     3   0.900000E-01   1.00800           0   0.00000     -0.301140E-02
    2811 1S   195  HSD  HB2     3   0.900000E-01   1.00800           0   0.00000     -0.301140E-02
    2812 1S   195  HSD  ND1    51  -0.360000       14.0070           0   0.00000     -0.301140E-02
    2813 1S   195  HSD  HD1     1   0.320000       1.00800           0   0.00000     -0.301140E-02
    2814 1S   195  HSD  CG     25  -0.500000E-01   12.0110           0   0.00000     -0.301140E-02
    2815 1S   195  HSD  CE1    26   0.250000       12.0110           0   0.00000     -0.301140E-02
    2816 1S   195  HSD  HE1     7   0.130000       1.00800           0   0.00000     -0.301140E-02
    2817 1S   195  HSD  NE2    52  -0.700000       14.0070           0   0.00000     -0.301140E-02
    2818 1S   195  HSD  CD2    25   0.220000       12.0110           0   0.00000     -0.301140E-02
    2819 1S   195  HSD  HD2     9   0.100000       1.00800           0   0.00000     -0.301140E-02
    2820 1S   195  HSD  C      20   0.510000       12.0110           0   0.00000     -0.301140E-02
    2821 1S   195  HSD  O      70  -0.510000       15.9990           0   0.00000     -0.301140E-02
    2822 1S   196  TYR  N      54  -0.470000       14.0070           0   0.00000     -0.301140E-02
    2823 1S   196  TYR  HN      1   0.310000       1.00800           0   0.00000     -0.301140E-02
    2824 1S   196  TYR  CA     22   0.700000E-01   12.0110           0   0.00000     -0.301140E-02
    2825 1S   196  TYR  HA      6   0.900000E-01   1.00800           0   0.00000     -0.301140E-02
    2826 1S   196  TYR  CB     23  -0.180000       12.0110           0   0.00000     -0.301140E-02
    2827 1S   196  TYR  HB1     3   0.900000E-01   1.00800           0   0.00000     -0.301140E-02
    2828 1S   196  TYR  HB2     3   0.900000E-01   1.00800           0   0.00000     -0.301140E-02
    2829 1S   196  TYR  CG     21    0.00000       12.0110           0   0.00000     -0.301140E-02
    2830 1S   196  TYR  CD1    21  -0.115000       12.0110           0   0.00000     -0.301140E-02
    2831 1S   196  TYR  HD1     5   0.115000       1.00800           0   0.00000     -0.301140E-02
    2832 1S   196  TYR  CE1    21  -0.115000       12.0110           0   0.00000     -0.301140E-02
    2833 1S   196  TYR  HE1     5   0.115000       1.00800           0   0.00000     -0.301140E-02
    2834 1S   196  TYR  CZ     21   0.110000       12.0110           0   0.00000     -0.301140E-02
    2835 1S   196  TYR  OH     73  -0.540000       15.9990           0   0.00000     -0.301140E-02
    2836 1S   196  TYR  HH      1   0.430000       1.00800           0   0.00000     -0.301140E-02
    2837 1S   196  TYR  CD2    21  -0.115000       12.0110           0   0.00000     -0.301140E-02
    2838 1S   196  TYR  HD2     5   0.115000       1.00800           0   0.00000     -0.301140E-02
    2839 1S   196  TYR  CE2    21  -0.115000       12.0110           0   0.00000     -0.301140E-02
    2840 1S   196  TYR  HE2     5   0.115000       1.00800           0   0.00000     -0.301140E-02
    2841 1S   196  TYR  C      20   0.510000       12.0110           0   0.00000     -0.301140E-02
    2842 1S   196  TYR  O      70  -0.510000       15.9990           0   0.00000     -0.301140E-02
    2843 1S   197  GLU  N      54  -0.470000       14.0070           0   0.00000     -0.301140E-02
    2844 1S   197  GLU  HN      1   0.310000       1.00800           0   0.00000     -0.301140E-02
    2845 1S   197  GLU  CA     22   0.700000E-01   12.0110           0   0.00000     -0.301140E-02
    2846 1S   197  GLU  HA      6   0.900000E-01   1.00800           0   0.00000     -0.301140E-02
    2847 1S   197  GLU  CB     23  -0.180000       12.0110           0   0.00000     -0.301140E-02
    2848 1S   197  GLU  HB1     3   0.900000E-01   1.00800           0   0.00000     -0.301140E-02
    2849 1S   197  GLU  HB2     3   0.900000E-01   1.00800           0   0.00000     -0.301140E-02
    2850 1S   197  GLU  CG     23  -0.280000       12.0110           0   0.00000     -0.301140E-02
    2851 1S   197  GLU  HG1     3   0.900000E-01   1.00800           0   0.00000     -0.301140E-02
    2852 1S   197  GLU  HG2     3   0.900000E-01   1.00800           0   0.00000     -0.301140E-02
    2853 1S   197  GLU  CD     32   0.620000       12.0110           0   0.00000     -0.301140E-02
    2854 1S   197  GLU  OE1    72  -0.760000       15.9990           0   0.00000     -0.301140E-02
    2855 1S   197  GLU  OE2    72  -0.760000       15.9990           0   0.00000     -0.301140E-02
    2856 1S   197  GLU  C      20   0.510000       12.0110           0   0.00000     -0.301140E-02
    2857 1S   197  GLU  O      70  -0.510000       15.9990           0   0.00000     -0.301140E-02
    2858 1S   198  ASP  N      54  -0.470000       14.0070           0   0.00000     -0.301140E-02
    2859 1S   198  ASP  HN      1   0.310000       1.00800           0   0.00000     -0.301140E-02
    2860 1S   198  ASP  CA     22   0.700000E-01   12.0110           0   0.00000     -0.301140E-02
    2861 1S   198  ASP  HA      6   0.900000E-01   1.00800           0   0.00000     -0.301140E-02
    2862 1S   198  ASP  CB     23  -0.280000       12.0110           0   0.00000     -0.301140E-02
    2863 1S   198  ASP  HB1     3   0.900000E-01   1.00800           0   0.00000     -0.301140E-02
    2864 1S   198  ASP  HB2     3   0.900000E-01   1.00800           0   0.00000     -0.301140E-02
    2865 1S   198  ASP  CG     32   0.620000       12.0110           0   0.00000     -0.301140E-02
    2866 1S   198  ASP  OD1    72  -0.760000       15.9990           0   0.00000     -0.301140E-02
    2867 1S   198  ASP  OD2    72  -0.760000       15.9990           0   0.00000     -0.301140E-02
    2868 1S   198  ASP  C      20   0.510000       12.0110           0   0.00000     -0.301140E-02
    2869 1S   198  ASP  O      70  -0.510000       15.9990           0   0.00000     -0.301140E-02
    2870 1S   199  TYR  N      54  -0.470000       14.0070           0   0.00000     -0.301140E-02
    2871 1S   199  TYR  HN      1   0.310000       1.00800           0   0.00000     -0.301140E-02
    2872 1S   199  TYR  CA     22   0.700000E-01   12.0110           0   0.00000     -0.301140E-02
    2873 1S   199  TYR  HA      6   0.900000E-01   1.00800           0   0.00000     -0.301140E-02
    2874 1S   199  TYR  CB     23  -0.180000       12.0110           0   0.00000     -0.301140E-02
    2875 1S   199  TYR  HB1     3   0.900000E-01   1.00800           0   0.00000     -0.301140E-02
    2876 1S   199  TYR  HB2     3   0.900000E-01   1.00800           0   0.00000     -0.301140E-02
    2877 1S   199  TYR  CG     21    0.00000       12.0110           0   0.00000     -0.301140E-02
    2878 1S   199  TYR  CD1    21  -0.115000       12.0110           0   0.00000     -0.301140E-02
    2879 1S   199  TYR  HD1     5   0.115000       1.00800           0   0.00000     -0.301140E-02
    2880 1S   199  TYR  CE1    21  -0.115000       12.0110           0   0.00000     -0.301140E-02
    2881 1S   199  TYR  HE1     5   0.115000       1.00800           0   0.00000     -0.301140E-02
    2882 1S   199  TYR  CZ     21   0.110000       12.0110           0   0.00000     -0.301140E-02
    2883 1S   199  TYR  OH     73  -0.540000       15.9990           0   0.00000     -0.301140E-02
    2884 1S   199  TYR  HH      1   0.430000       1.00800           0   0.00000     -0.301140E-02
    2885 1S   199  TYR  CD2    21  -0.115000       12.0110           0   0.00000     -0.301140E-02
    2886 1S   199  TYR  HD2     5   0.115000       1.00800           0   0.00000     -0.301140E-02
    2887 1S   199  TYR  CE2    21  -0.115000       12.0110           0   0.00000     -0.301140E-02
    2888 1S   199  TYR  HE2     5   0.115000       1.00800           0   0.00000     -0.301140E-02
    2889 1S   199  TYR  C      20   0.510000       12.0110           0   0.00000     -0.301140E-02
    2890 1S   199  TYR  O      70  -0.510000       15.9990           0   0.00000     -0.301140E-02
    2891 1S   200  GLY  N      54  -0.470000       14.0070           0   0.00000     -0.301140E-02
    2892 1S   200  GLY  HN      1   0.310000       1.00800           0   0.00000     -0.301140E-02
    2893 1S   200  GLY  CA     23  -0.200000E-01   12.0110           0   0.00000     -0.301140E-02
    2894 1S   200  GLY  HA1     6   0.900000E-01   1.00800           0   0.00000     -0.301140E-02
    2895 1S   200  GLY  HA2     6   0.900000E-01   1.00800           0   0.00000     -0.301140E-02
    2896 1S   200  GLY  C      20   0.510000       12.0110           0   0.00000     -0.301140E-02
    2897 1S   200  GLY  O      70  -0.510000       15.9990           0   0.00000     -0.301140E-02
    2898 1S   201  ASP  N      54  -0.470000       14.0070           0   0.00000     -0.301140E-02
    2899 1S   201  ASP  HN      1   0.310000       1.00800           0   0.00000     -0.301140E-02
    2900 1S   201  ASP  CA     22   0.700000E-01   12.0110           0   0.00000     -0.301140E-02
    2901 1S   201  ASP  HA      6   0.900000E-01   1.00800           0   0.00000     -0.301140E-02
    2902 1S   201  ASP  CB     23  -0.280000       12.0110           0   0.00000     -0.301140E-02
    2903 1S   201  ASP  HB1     3   0.900000E-01   1.00800           0   0.00000     -0.301140E-02
    2904 1S   201  ASP  HB2     3   0.900000E-01   1.00800           0   0.00000     -0.301140E-02
    2905 1S   201  ASP  CG     32   0.620000       12.0110           0   0.00000     -0.301140E-02
    2906 1S   201  ASP  OD1    72  -0.760000       15.9990           0   0.00000     -0.301140E-02
    2907 1S   201  ASP  OD2    72  -0.760000       15.9990           0   0.00000     -0.301140E-02
    2908 1S   201  ASP  C      20   0.510000       12.0110           0   0.00000     -0.301140E-02
    2909 1S   201  ASP  O      70  -0.510000       15.9990           0   0.00000     -0.301140E-02
    2910 1S   202  TYR  N      54  -0.470000       14.0070           0   0.00000     -0.301140E-02
    2911 1S   202  TYR  HN      1   0.310000       1.00800           0   0.00000     -0.301140E-02
    2912 1S   202  TYR  CA     22   0.700000E-01   12.0110           0   0.00000     -0.301140E-02
    2913 1S   202  TYR  HA      6   0.900000E-01   1.00800           0   0.00000     -0.301140E-02
    2914 1S   202  TYR  CB     23  -0.180000       12.0110           0   0.00000     -0.301140E-02
    2915 1S   202  TYR  HB1     3   0.900000E-01   1.00800           0   0.00000     -0.301140E-02
    2916 1S   202  TYR  HB2     3   0.900000E-01   1.00800           0   0.00000     -0.301140E-02
    2917 1S   202  TYR  CG     21    0.00000       12.0110           0   0.00000     -0.301140E-02
    2918 1S   202  TYR  CD1    21  -0.115000       12.0110           0   0.00000     -0.301140E-02
    2919 1S   202  TYR  HD1     5   0.115000       1.00800           0   0.00000     -0.301140E-02
    2920 1S   202  TYR  CE1    21  -0.115000       12.0110           0   0.00000     -0.301140E-02
    2921 1S   202  TYR  HE1     5   0.115000       1.00800           0   0.00000     -0.301140E-02
    2922 1S   202  TYR  CZ     21   0.110000       12.0110           0   0.00000     -0.301140E-02
    2923 1S   202  TYR  OH     73  -0.540000       15.9990           0   0.00000     -0.301140E-02
    2924 1S   202  TYR  HH      1   0.430000       1.00800           0   0.00000     -0.301140E-02
    2925 1S   202  TYR  CD2    21  -0.115000       12.0110           0   0.00000     -0.301140E-02
    2926 1S   202  TYR  HD2     5   0.115000       1.00800           0   0.00000     -0.301140E-02
    2927 1S   202  TYR  CE2    21  -0.115000       12.0110           0   0.00000     -0.301140E-02
    2928 1S   202  TYR  HE2     5   0.115000       1.00800           0   0.00000     -0.301140E-02
    2929 1S   202  TYR  C      20   0.510000       12.0110           0   0.00000     -0.301140E-02
    2930 1S   202  TYR  O      70  -0.510000       15.9990           0   0.00000     -0.301140E-02
    2931 1S   203  TRP  N      54  -0.470000       14.0070           0   0.00000     -0.301140E-02
    2932 1S   203  TRP  HN      1   0.310000       1.00800           0   0.00000     -0.301140E-02
    2933 1S   203  TRP  CA     22   0.700000E-01   12.0110           0   0.00000     -0.301140E-02
    2934 1S   203  TRP  HA      6   0.900000E-01   1.00800           0   0.00000     -0.301140E-02
    2935 1S   203  TRP  CB     23  -0.180000       12.0110           0   0.00000     -0.301140E-02
    2936 1S   203  TRP  HB1     3   0.900000E-01   1.00800           0   0.00000     -0.301140E-02
    2937 1S   203  TRP  HB2     3   0.900000E-01   1.00800           0   0.00000     -0.301140E-02
    2938 1S   203  TRP  CG     28  -0.300000E-01   12.0110           0   0.00000     -0.301140E-02
    2939 1S   203  TRP  CD1    21   0.350000E-01   12.0110           0   0.00000     -0.301140E-02
    2940 1S   203  TRP  HD1     5   0.115000       1.00800           0   0.00000     -0.301140E-02
    2941 1S   203  TRP  NE1    58  -0.610000       14.0070           0   0.00000     -0.301140E-02
    2942 1S   203  TRP  HE1     1   0.380000       1.00800           0   0.00000     -0.301140E-02
    2943 1S   203  TRP  CE2    27   0.130000       12.0110           0   0.00000     -0.301140E-02
    2944 1S   203  TRP  CD2    27  -0.200000E-01   12.0110           0   0.00000     -0.301140E-02
    2945 1S   203  TRP  CE3    21  -0.115000       12.0110           0   0.00000     -0.301140E-02
    2946 1S   203  TRP  HE3     5   0.115000       1.00800           0   0.00000     -0.301140E-02
    2947 1S   203  TRP  CZ3    21  -0.115000       12.0110           0   0.00000     -0.301140E-02
    2948 1S   203  TRP  HZ3     5   0.115000       1.00800           0   0.00000     -0.301140E-02
    2949 1S   203  TRP  CZ2    21  -0.115000       12.0110           0   0.00000     -0.301140E-02
    2950 1S   203  TRP  HZ2     5   0.115000       1.00800           0   0.00000     -0.301140E-02
    2951 1S   203  TRP  CH2    21  -0.115000       12.0110           0   0.00000     -0.301140E-02
    2952 1S   203  TRP  HH2     5   0.115000       1.00800           0   0.00000     -0.301140E-02
    2953 1S   203  TRP  C      20   0.510000       12.0110           0   0.00000     -0.301140E-02
    2954 1S   203  TRP  O      70  -0.510000       15.9990           0   0.00000     -0.301140E-02
    2955 1S   204  ARG  N      54  -0.470000       14.0070           0   0.00000     -0.301140E-02
    2956 1S   204  ARG  HN      1   0.310000       1.00800           0   0.00000     -0.301140E-02
    2957 1S   204  ARG  CA     22   0.700000E-01   12.0110           0   0.00000     -0.301140E-02
    2958 1S   204  ARG  HA      6   0.900000E-01   1.00800           0   0.00000     -0.301140E-02
    2959 1S   204  ARG  CB     23  -0.180000       12.0110           0   0.00000     -0.301140E-02
    2960 1S   204  ARG  HB1     3   0.900000E-01   1.00800           0   0.00000     -0.301140E-02
    2961 1S   204  ARG  HB2     3   0.900000E-01   1.00800           0   0.00000     -0.301140E-02
    2962 1S   204  ARG  CG     23  -0.180000       12.0110           0   0.00000     -0.301140E-02
    2963 1S   204  ARG  HG1     3   0.900000E-01   1.00800           0   0.00000     -0.301140E-02
    2964 1S   204  ARG  HG2     3   0.900000E-01   1.00800           0   0.00000     -0.301140E-02
    2965 1S   204  ARG  CD     23   0.200000       12.0110           0   0.00000     -0.301140E-02
    2966 1S   204  ARG  HD1     3   0.900000E-01   1.00800           0   0.00000     -0.301140E-02
    2967 1S   204  ARG  HD2     3   0.900000E-01   1.00800           0   0.00000     -0.301140E-02
    2968 1S   204  ARG  NE     57  -0.700000       14.0070           0   0.00000     -0.301140E-02
    2969 1S   204  ARG  HE      2   0.440000       1.00800           0   0.00000     -0.301140E-02
    2970 1S   204  ARG  CZ     20   0.640000       12.0110           0   0.00000     -0.301140E-02
    2971 1S   204  ARG  NH1    57  -0.800000       14.0070           0   0.00000     -0.301140E-02
    2972 1S   204  ARG  HH11    2   0.460000       1.00800           0   0.00000     -0.301140E-02
    2973 1S   204  ARG  HH12    2   0.460000       1.00800           0   0.00000     -0.301140E-02
    2974 1S   204  ARG  NH2    57  -0.800000       14.0070           0   0.00000     -0.301140E-02
    2975 1S   204  ARG  HH21    2   0.460000       1.00800           0   0.00000     -0.301140E-02
    2976 1S   204  ARG  HH22    2   0.460000       1.00800           0   0.00000     -0.301140E-02
    2977 1S   204  ARG  C      20   0.510000       12.0110           0   0.00000     -0.301140E-02
    2978 1S   204  ARG  O      70  -0.510000       15.9990           0   0.00000     -0.301140E-02
    2979 1S   205  GLY  N      54  -0.470000       14.0070           0   0.00000     -0.301140E-02
    2980 1S   205  GLY  HN      1   0.310000       1.00800           0   0.00000     -0.301140E-02
    2981 1S   205  GLY  CA     23  -0.200000E-01   12.0110           0   0.00000     -0.301140E-02
    2982 1S   205  GLY  HA1     6   0.900000E-01   1.00800           0   0.00000     -0.301140E-02
    2983 1S   205  GLY  HA2     6   0.900000E-01   1.00800           0   0.00000     -0.301140E-02
    2984 1S   205  GLY  C      20   0.510000       12.0110           0   0.00000     -0.301140E-02
    2985 1S   205  GLY  O      70  -0.510000       15.9990           0   0.00000     -0.301140E-02
    2986 1S   206  ASP  N      54  -0.470000       14.0070           0   0.00000     -0.301140E-02
    2987 1S   206  ASP  HN      1   0.310000       1.00800           0   0.00000     -0.301140E-02
    2988 1S   206  ASP  CA     22   0.700000E-01   12.0110           0   0.00000     -0.301140E-02
    2989 1S   206  ASP  HA      6   0.900000E-01   1.00800           0   0.00000     -0.301140E-02
    2990 1S   206  ASP  CB     23  -0.280000       12.0110           0   0.00000     -0.301140E-02
    2991 1S   206  ASP  HB1     3   0.900000E-01   1.00800           0   0.00000     -0.301140E-02
    2992 1S   206  ASP  HB2     3   0.900000E-01   1.00800           0   0.00000     -0.301140E-02
    2993 1S   206  ASP  CG     32   0.620000       12.0110           0   0.00000     -0.301140E-02
    2994 1S   206  ASP  OD1    72  -0.760000       15.9990           0   0.00000     -0.301140E-02
    2995 1S   206  ASP  OD2    72  -0.760000       15.9990           0   0.00000     -0.301140E-02
    2996 1S   206  ASP  C      20   0.510000       12.0110           0   0.00000     -0.301140E-02
    2997 1S   206  ASP  O      70  -0.510000       15.9990           0   0.00000     -0.301140E-02
    2998 1S   207  TYR  N      54  -0.470000       14.0070           0   0.00000     -0.301140E-02
    2999 1S   207  TYR  HN      1   0.310000       1.00800           0   0.00000     -0.301140E-02
    3000 1S   207  TYR  CA     22   0.700000E-01   12.0110           0   0.00000     -0.301140E-02
    3001 1S   207  TYR  HA      6   0.900000E-01   1.00800           0   0.00000     -0.301140E-02
    3002 1S   207  TYR  CB     23  -0.180000       12.0110           0   0.00000     -0.301140E-02
    3003 1S   207  TYR  HB1     3   0.900000E-01   1.00800           0   0.00000     -0.301140E-02
    3004 1S   207  TYR  HB2     3   0.900000E-01   1.00800           0   0.00000     -0.301140E-02
    3005 1S   207  TYR  CG     21    0.00000       12.0110           0   0.00000     -0.301140E-02
    3006 1S   207  TYR  CD1    21  -0.115000       12.0110           0   0.00000     -0.301140E-02
    3007 1S   207  TYR  HD1     5   0.115000       1.00800           0   0.00000     -0.301140E-02
    3008 1S   207  TYR  CE1    21  -0.115000       12.0110           0   0.00000     -0.301140E-02
    3009 1S   207  TYR  HE1     5   0.115000       1.00800           0   0.00000     -0.301140E-02
    3010 1S   207  TYR  CZ     21   0.110000       12.0110           0   0.00000     -0.301140E-02
    3011 1S   207  TYR  OH     73  -0.540000       15.9990           0   0.00000     -0.301140E-02
    3012 1S   207  TYR  HH      1   0.430000       1.00800           0   0.00000     -0.301140E-02
    3013 1S   207  TYR  CD2    21  -0.115000       12.0110           0   0.00000     -0.301140E-02
    3014 1S   207  TYR  HD2     5   0.115000       1.00800           0   0.00000     -0.301140E-02
    3015 1S   207  TYR  CE2    21  -0.115000       12.0110           0   0.00000     -0.301140E-02
    3016 1S   207  TYR  HE2     5   0.115000       1.00800           0   0.00000     -0.301140E-02
    3017 1S   207  TYR  C      20   0.510000       12.0110           0   0.00000     -0.301140E-02
    3018 1S   207  TYR  O      70  -0.510000       15.9990           0   0.00000     -0.301140E-02
    3019 1S   208  GLU  N      54  -0.470000       14.0070           0   0.00000     -0.301140E-02
    3020 1S   208  GLU  HN      1   0.310000       1.00800           0   0.00000     -0.301140E-02
    3021 1S   208  GLU  CA     22   0.700000E-01   12.0110           0   0.00000     -0.301140E-02
    3022 1S   208  GLU  HA      6   0.900000E-01   1.00800           0   0.00000     -0.301140E-02
    3023 1S   208  GLU  CB     23  -0.180000       12.0110           0   0.00000     -0.301140E-02
    3024 1S   208  GLU  HB1     3   0.900000E-01   1.00800           0   0.00000     -0.301140E-02
    3025 1S   208  GLU  HB2     3   0.900000E-01   1.00800           0   0.00000     -0.301140E-02
    3026 1S   208  GLU  CG     23  -0.280000       12.0110           0   0.00000     -0.301140E-02
    3027 1S   208  GLU  HG1     3   0.900000E-01   1.00800           0   0.00000     -0.301140E-02
    3028 1S   208  GLU  HG2     3   0.900000E-01   1.00800           0   0.00000     -0.301140E-02
    3029 1S   208  GLU  CD     32   0.620000       12.0110           0   0.00000     -0.301140E-02
    3030 1S   208  GLU  OE1    72  -0.760000       15.9990           0   0.00000     -0.301140E-02
    3031 1S   208  GLU  OE2    72  -0.760000       15.9990           0   0.00000     -0.301140E-02
    3032 1S   208  GLU  C      20   0.510000       12.0110           0   0.00000     -0.301140E-02
    3033 1S   208  GLU  O      70  -0.510000       15.9990           0   0.00000     -0.301140E-02
    3034 1S   209  VAL  N      54  -0.470000       14.0070           0   0.00000     -0.301140E-02
    3035 1S   209  VAL  HN      1   0.310000       1.00800           0   0.00000     -0.301140E-02
    3036 1S   209  VAL  CA     22   0.700000E-01   12.0110           0   0.00000     -0.301140E-02
    3037 1S   209  VAL  HA      6   0.900000E-01   1.00800           0   0.00000     -0.301140E-02
    3038 1S   209  VAL  CB     22  -0.900000E-01   12.0110           0   0.00000     -0.301140E-02
    3039 1S   209  VAL  HB      3   0.900000E-01   1.00800           0   0.00000     -0.301140E-02
    3040 1S   209  VAL  CG1    24  -0.270000       12.0110           0   0.00000     -0.301140E-02
    3041 1S   209  VAL  HG11    3   0.900000E-01   1.00800           0   0.00000     -0.301140E-02
    3042 1S   209  VAL  HG12    3   0.900000E-01   1.00800           0   0.00000     -0.301140E-02
    3043 1S   209  VAL  HG13    3   0.900000E-01   1.00800           0   0.00000     -0.301140E-02
    3044 1S   209  VAL  CG2    24  -0.270000       12.0110           0   0.00000     -0.301140E-02
    3045 1S   209  VAL  HG21    3   0.900000E-01   1.00800           0   0.00000     -0.301140E-02
    3046 1S   209  VAL  HG22    3   0.900000E-01   1.00800           0   0.00000     -0.301140E-02
    3047 1S   209  VAL  HG23    3   0.900000E-01   1.00800           0   0.00000     -0.301140E-02
    3048 1S   209  VAL  C      20   0.510000       12.0110           0   0.00000     -0.301140E-02
    3049 1S   209  VAL  O      70  -0.510000       15.9990           0   0.00000     -0.301140E-02
    3050 1S   210  ASN  N      54  -0.470000       14.0070           0   0.00000     -0.301140E-02
    3051 1S   210  ASN  HN      1   0.310000       1.00800           0   0.00000     -0.301140E-02
    3052 1S   210  ASN  CA     22   0.700000E-01   12.0110           0   0.00000     -0.301140E-02
    3053 1S   210  ASN  HA      6   0.900000E-01   1.00800           0   0.00000     -0.301140E-02
    3054 1S   210  ASN  CB     23  -0.180000       12.0110           0   0.00000     -0.301140E-02
    3055 1S   210  ASN  HB1     3   0.900000E-01   1.00800           0   0.00000     -0.301140E-02
    3056 1S   210  ASN  HB2     3   0.900000E-01   1.00800           0   0.00000     -0.301140E-02
    3057 1S   210  ASN  CG     32   0.550000       12.0110           0   0.00000     -0.301140E-02
    3058 1S   210  ASN  OD1    70  -0.550000       15.9990           0   0.00000     -0.301140E-02
    3059 1S   210  ASN  ND2    55  -0.620000       14.0070           0   0.00000     -0.301140E-02
    3060 1S   210  ASN  HD21    1   0.320000       1.00800           0   0.00000     -0.301140E-02
    3061 1S   210  ASN  HD22    1   0.300000       1.00800           0   0.00000     -0.301140E-02
    3062 1S   210  ASN  C      20   0.510000       12.0110           0   0.00000     -0.301140E-02
    3063 1S   210  ASN  O      70  -0.510000       15.9990           0   0.00000     -0.301140E-02
    3064 1S   211  GLY  N      54  -0.470000       14.0070           0   0.00000     -0.301140E-02
    3065 1S   211  GLY  HN      1   0.310000       1.00800           0   0.00000     -0.301140E-02
    3066 1S   211  GLY  CA     23  -0.200000E-01   12.0110           0   0.00000     -0.301140E-02
    3067 1S   211  GLY  HA1     6   0.900000E-01   1.00800           0   0.00000     -0.301140E-02
    3068 1S   211  GLY  HA2     6   0.900000E-01   1.00800           0   0.00000     -0.301140E-02
    3069 1S   211  GLY  C      20   0.510000       12.0110           0   0.00000     -0.301140E-02
    3070 1S   211  GLY  O      70  -0.510000       15.9990           0   0.00000     -0.301140E-02
    3071 1S   212  VAL  N      54  -0.470000       14.0070           0   0.00000     -0.301140E-02
    3072 1S   212  VAL  HN      1   0.310000       1.00800           0   0.00000     -0.301140E-02
    3073 1S   212  VAL  CA     22   0.700000E-01   12.0110           0   0.00000     -0.301140E-02
    3074 1S   212  VAL  HA      6   0.900000E-01   1.00800           0   0.00000     -0.301140E-02
    3075 1S   212  VAL  CB     22  -0.900000E-01   12.0110           0   0.00000     -0.301140E-02
    3076 1S   212  VAL  HB      3   0.900000E-01   1.00800           0   0.00000     -0.301140E-02
    3077 1S   212  VAL  CG1    24  -0.270000       12.0110           0   0.00000     -0.301140E-02
    3078 1S   212  VAL  HG11    3   0.900000E-01   1.00800           0   0.00000     -0.301140E-02
    3079 1S   212  VAL  HG12    3   0.900000E-01   1.00800           0   0.00000     -0.301140E-02
    3080 1S   212  VAL  HG13    3   0.900000E-01   1.00800           0   0.00000     -0.301140E-02
    3081 1S   212  VAL  CG2    24  -0.270000       12.0110           0   0.00000     -0.301140E-02
    3082 1S   212  VAL  HG21    3   0.900000E-01   1.00800           0   0.00000     -0.301140E-02
    3083 1S   212  VAL  HG22    3   0.900000E-01   1.00800           0   0.00000     -0.301140E-02
    3084 1S   212  VAL  HG23    3   0.900000E-01   1.00800           0   0.00000     -0.301140E-02
    3085 1S   212  VAL  C      20   0.510000       12.0110           0   0.00000     -0.301140E-02
    3086 1S   212  VAL  O      70  -0.510000       15.9990           0   0.00000     -0.301140E-02
    3087 1S   213  ASP  N      54  -0.470000       14.0070           0   0.00000     -0.301140E-02
    3088 1S   213  ASP  HN      1   0.310000       1.00800           0   0.00000     -0.301140E-02
    3089 1S   213  ASP  CA     22   0.700000E-01   12.0110           0   0.00000     -0.301140E-02
    3090 1S   213  ASP  HA      6   0.900000E-01   1.00800           0   0.00000     -0.301140E-02
    3091 1S   213  ASP  CB     23  -0.280000       12.0110           0   0.00000     -0.301140E-02
    3092 1S   213  ASP  HB1     3   0.900000E-01   1.00800           0   0.00000     -0.301140E-02
    3093 1S   213  ASP  HB2     3   0.900000E-01   1.00800           0   0.00000     -0.301140E-02
    3094 1S   213  ASP  CG     32   0.620000       12.0110           0   0.00000     -0.301140E-02
    3095 1S   213  ASP  OD1    72  -0.760000       15.9990           0   0.00000     -0.301140E-02
    3096 1S   213  ASP  OD2    72  -0.760000       15.9990           0   0.00000     -0.301140E-02
    3097 1S   213  ASP  C      20   0.510000       12.0110           0   0.00000     -0.301140E-02
    3098 1S   213  ASP  O      70  -0.510000       15.9990           0   0.00000     -0.301140E-02
    3099 1S   214  GLY  N      54  -0.470000       14.0070           0   0.00000     -0.301140E-02
    3100 1S   214  GLY  HN      1   0.310000       1.00800           0   0.00000     -0.301140E-02
    3101 1S   214  GLY  CA     23  -0.200000E-01   12.0110           0   0.00000     -0.301140E-02
    3102 1S   214  GLY  HA1     6   0.900000E-01   1.00800           0   0.00000     -0.301140E-02
    3103 1S   214  GLY  HA2     6   0.900000E-01   1.00800           0   0.00000     -0.301140E-02
    3104 1S   214  GLY  C      20   0.510000       12.0110           0   0.00000     -0.301140E-02
    3105 1S   214  GLY  O      70  -0.510000       15.9990           0   0.00000     -0.301140E-02
    3106 1S   215  TYR  N      54  -0.470000       14.0070           0   0.00000     -0.301140E-02
    3107 1S   215  TYR  HN      1   0.310000       1.00800           0   0.00000     -0.301140E-02
    3108 1S   215  TYR  CA     22   0.700000E-01   12.0110           0   0.00000     -0.301140E-02
    3109 1S   215  TYR  HA      6   0.900000E-01   1.00800           0   0.00000     -0.301140E-02
    3110 1S   215  TYR  CB     23  -0.180000       12.0110           0   0.00000     -0.301140E-02
    3111 1S   215  TYR  HB1     3   0.900000E-01   1.00800           0   0.00000     -0.301140E-02
    3112 1S   215  TYR  HB2     3   0.900000E-01   1.00800           0   0.00000     -0.301140E-02
    3113 1S   215  TYR  CG     21    0.00000       12.0110           0   0.00000     -0.301140E-02
    3114 1S   215  TYR  CD1    21  -0.115000       12.0110           0   0.00000     -0.301140E-02
    3115 1S   215  TYR  HD1     5   0.115000       1.00800           0   0.00000     -0.301140E-02
    3116 1S   215  TYR  CE1    21  -0.115000       12.0110           0   0.00000     -0.301140E-02
    3117 1S   215  TYR  HE1     5   0.115000       1.00800           0   0.00000     -0.301140E-02
    3118 1S   215  TYR  CZ     21   0.110000       12.0110           0   0.00000     -0.301140E-02
    3119 1S   215  TYR  OH     73  -0.540000       15.9990           0   0.00000     -0.301140E-02
    3120 1S   215  TYR  HH      1   0.430000       1.00800           0   0.00000     -0.301140E-02
    3121 1S   215  TYR  CD2    21  -0.115000       12.0110           0   0.00000     -0.301140E-02
    3122 1S   215  TYR  HD2     5   0.115000       1.00800           0   0.00000     -0.301140E-02
    3123 1S   215  TYR  CE2    21  -0.115000       12.0110           0   0.00000     -0.301140E-02
    3124 1S   215  TYR  HE2     5   0.115000       1.00800           0   0.00000     -0.301140E-02
    3125 1S   215  TYR  C      20   0.510000       12.0110           0   0.00000     -0.301140E-02
    3126 1S   215  TYR  O      70  -0.510000       15.9990           0   0.00000     -0.301140E-02
    3127 1S   216  ASP  N      54  -0.470000       14.0070           0   0.00000     -0.301140E-02
    3128 1S   216  ASP  HN      1   0.310000       1.00800           0   0.00000     -0.301140E-02
    3129 1S   216  ASP  CA     22   0.700000E-01   12.0110           0   0.00000     -0.301140E-02
    3130 1S   216  ASP  HA      6   0.900000E-01   1.00800           0   0.00000     -0.301140E-02
    3131 1S   216  ASP  CB     23  -0.280000       12.0110           0   0.00000     -0.301140E-02
    3132 1S   216  ASP  HB1     3   0.900000E-01   1.00800           0   0.00000     -0.301140E-02
    3133 1S   216  ASP  HB2     3   0.900000E-01   1.00800           0   0.00000     -0.301140E-02
    3134 1S   216  ASP  CG     32   0.620000       12.0110           0   0.00000     -0.301140E-02
    3135 1S   216  ASP  OD1    72  -0.760000       15.9990           0   0.00000     -0.301140E-02
    3136 1S   216  ASP  OD2    72  -0.760000       15.9990           0   0.00000     -0.301140E-02
    3137 1S   216  ASP  C      20   0.510000       12.0110           0   0.00000     -0.301140E-02
    3138 1S   216  ASP  O      70  -0.510000       15.9990           0   0.00000     -0.301140E-02
    3139 1S   217  TYR  N      54  -0.470000       14.0070           0   0.00000     -0.301140E-02
    3140 1S   217  TYR  HN      1   0.310000       1.00800           0   0.00000     -0.301140E-02
    3141 1S   217  TYR  CA     22   0.700000E-01   12.0110           0   0.00000     -0.301140E-02
    3142 1S   217  TYR  HA      6   0.900000E-01   1.00800           0   0.00000     -0.301140E-02
    3143 1S   217  TYR  CB     23  -0.180000       12.0110           0   0.00000     -0.301140E-02
    3144 1S   217  TYR  HB1     3   0.900000E-01   1.00800           0   0.00000     -0.301140E-02
    3145 1S   217  TYR  HB2     3   0.900000E-01   1.00800           0   0.00000     -0.301140E-02
    3146 1S   217  TYR  CG     21    0.00000       12.0110           0   0.00000     -0.301140E-02
    3147 1S   217  TYR  CD1    21  -0.115000       12.0110           0   0.00000     -0.301140E-02
    3148 1S   217  TYR  HD1     5   0.115000       1.00800           0   0.00000     -0.301140E-02
    3149 1S   217  TYR  CE1    21  -0.115000       12.0110           0   0.00000     -0.301140E-02
    3150 1S   217  TYR  HE1     5   0.115000       1.00800           0   0.00000     -0.301140E-02
    3151 1S   217  TYR  CZ     21   0.110000       12.0110           0   0.00000     -0.301140E-02
    3152 1S   217  TYR  OH     73  -0.540000       15.9990           0   0.00000     -0.301140E-02
    3153 1S   217  TYR  HH      1   0.430000       1.00800           0   0.00000     -0.301140E-02
    3154 1S   217  TYR  CD2    21  -0.115000       12.0110           0   0.00000     -0.301140E-02
    3155 1S   217  TYR  HD2     5   0.115000       1.00800           0   0.00000     -0.301140E-02
    3156 1S   217  TYR  CE2    21  -0.115000       12.0110           0   0.00000     -0.301140E-02
    3157 1S   217  TYR  HE2     5   0.115000       1.00800           0   0.00000     -0.301140E-02
    3158 1S   217  TYR  C      20   0.510000       12.0110           0   0.00000     -0.301140E-02
    3159 1S   217  TYR  O      70  -0.510000       15.9990           0   0.00000     -0.301140E-02
    3160 1S   218  SER  N      54  -0.470000       14.0070           0   0.00000     -0.301140E-02
    3161 1S   218  SER  HN      1   0.310000       1.00800           0   0.00000     -0.301140E-02
    3162 1S   218  SER  CA     22   0.700000E-01   12.0110           0   0.00000     -0.301140E-02
    3163 1S   218  SER  HA      6   0.900000E-01   1.00800           0   0.00000     -0.301140E-02
    3164 1S   218  SER  CB     23   0.500000E-01   12.0110           0   0.00000     -0.301140E-02
    3165 1S   218  SER  HB1     3   0.900000E-01   1.00800           0   0.00000     -0.301140E-02
    3166 1S   218  SER  HB2     3   0.900000E-01   1.00800           0   0.00000     -0.301140E-02
    3167 1S   218  SER  OG     73  -0.660000       15.9990           0   0.00000     -0.301140E-02
    3168 1S   218  SER  HG1     1   0.430000       1.00800           0   0.00000     -0.301140E-02
    3169 1S   218  SER  C      20   0.510000       12.0110           0   0.00000     -0.301140E-02
    3170 1S   218  SER  O      70  -0.510000       15.9990           0   0.00000     -0.301140E-02
    3171 1S   219  ARG  N      54  -0.470000       14.0070           0   0.00000     -0.301140E-02
    3172 1S   219  ARG  HN      1   0.310000       1.00800           0   0.00000     -0.301140E-02
    3173 1S   219  ARG  CA     22   0.700000E-01   12.0110           0   0.00000     -0.301140E-02
    3174 1S   219  ARG  HA      6   0.900000E-01   1.00800           0   0.00000     -0.301140E-02
    3175 1S   219  ARG  CB     23  -0.180000       12.0110           0   0.00000     -0.301140E-02
    3176 1S   219  ARG  HB1     3   0.900000E-01   1.00800           0   0.00000     -0.301140E-02
    3177 1S   219  ARG  HB2     3   0.900000E-01   1.00800           0   0.00000     -0.301140E-02
    3178 1S   219  ARG  CG     23  -0.180000       12.0110           0   0.00000     -0.301140E-02
    3179 1S   219  ARG  HG1     3   0.900000E-01   1.00800           0   0.00000     -0.301140E-02
    3180 1S   219  ARG  HG2     3   0.900000E-01   1.00800           0   0.00000     -0.301140E-02
    3181 1S   219  ARG  CD     23   0.200000       12.0110           0   0.00000     -0.301140E-02
    3182 1S   219  ARG  HD1     3   0.900000E-01   1.00800           0   0.00000     -0.301140E-02
    3183 1S   219  ARG  HD2     3   0.900000E-01   1.00800           0   0.00000     -0.301140E-02
    3184 1S   219  ARG  NE     57  -0.700000       14.0070           0   0.00000     -0.301140E-02
    3185 1S   219  ARG  HE      2   0.440000       1.00800           0   0.00000     -0.301140E-02
    3186 1S   219  ARG  CZ     20   0.640000       12.0110           0   0.00000     -0.301140E-02
    3187 1S   219  ARG  NH1    57  -0.800000       14.0070           0   0.00000     -0.301140E-02
    3188 1S   219  ARG  HH11    2   0.460000       1.00800           0   0.00000     -0.301140E-02
    3189 1S   219  ARG  HH12    2   0.460000       1.00800           0   0.00000     -0.301140E-02
    3190 1S   219  ARG  NH2    57  -0.800000       14.0070           0   0.00000     -0.301140E-02
    3191 1S   219  ARG  HH21    2   0.460000       1.00800           0   0.00000     -0.301140E-02
    3192 1S   219  ARG  HH22    2   0.460000       1.00800           0   0.00000     -0.301140E-02
    3193 1S   219  ARG  C      20   0.510000       12.0110           0   0.00000     -0.301140E-02
    3194 1S   219  ARG  O      70  -0.510000       15.9990           0   0.00000     -0.301140E-02
    3195 1S   220  GLY  N      54  -0.470000       14.0070           0   0.00000     -0.301140E-02
    3196 1S   220  GLY  HN      1   0.310000       1.00800           0   0.00000     -0.301140E-02
    3197 1S   220  GLY  CA     23  -0.200000E-01   12.0110           0   0.00000     -0.301140E-02
    3198 1S   220  GLY  HA1     6   0.900000E-01   1.00800           0   0.00000     -0.301140E-02
    3199 1S   220  GLY  HA2     6   0.900000E-01   1.00800           0   0.00000     -0.301140E-02
    3200 1S   220  GLY  C      20   0.510000       12.0110           0   0.00000     -0.301140E-02
    3201 1S   220  GLY  O      70  -0.510000       15.9990           0   0.00000     -0.301140E-02
    3202 1S   221  GLN  N      54  -0.470000       14.0070           0   0.00000     -0.301140E-02
    3203 1S   221  GLN  HN      1   0.310000       1.00800           0   0.00000     -0.301140E-02
    3204 1S   221  GLN  CA     22   0.700000E-01   12.0110           0   0.00000     -0.301140E-02
    3205 1S   221  GLN  HA      6   0.900000E-01   1.00800           0   0.00000     -0.301140E-02
    3206 1S   221  GLN  CB     23  -0.180000       12.0110           0   0.00000     -0.301140E-02
    3207 1S   221  GLN  HB1     3   0.900000E-01   1.00800           0   0.00000     -0.301140E-02
    3208 1S   221  GLN  HB2     3   0.900000E-01   1.00800           0   0.00000     -0.301140E-02
    3209 1S   221  GLN  CG     23  -0.180000       12.0110           0   0.00000     -0.301140E-02
    3210 1S   221  GLN  HG1     3   0.900000E-01   1.00800           0   0.00000     -0.301140E-02
    3211 1S   221  GLN  HG2     3   0.900000E-01   1.00800           0   0.00000     -0.301140E-02
    3212 1S   221  GLN  CD     32   0.550000       12.0110           0   0.00000     -0.301140E-02
    3213 1S   221  GLN  OE1    70  -0.550000       15.9990           0   0.00000     -0.301140E-02
    3214 1S   221  GLN  NE2    55  -0.620000       14.0070           0   0.00000     -0.301140E-02
    3215 1S   221  GLN  HE21    1   0.320000       1.00800           0   0.00000     -0.301140E-02
    3216 1S   221  GLN  HE22    1   0.300000       1.00800           0   0.00000     -0.301140E-02
    3217 1S   221  GLN  C      20   0.510000       12.0110           0   0.00000     -0.301140E-02
    3218 1S   221  GLN  O      70  -0.510000       15.9990           0   0.00000     -0.301140E-02
    3219 1S   222  LEU  N      54  -0.470000       14.0070           0   0.00000     -0.301140E-02
    3220 1S   222  LEU  HN      1   0.310000       1.00800           0   0.00000     -0.301140E-02
    3221 1S   222  LEU  CA     22   0.700000E-01   12.0110           0   0.00000     -0.301140E-02
    3222 1S   222  LEU  HA      6   0.900000E-01   1.00800           0   0.00000     -0.301140E-02
    3223 1S   222  LEU  CB     23  -0.180000       12.0110           0   0.00000     -0.301140E-02
    3224 1S   222  LEU  HB1     3   0.900000E-01   1.00800           0   0.00000     -0.301140E-02
    3225 1S   222  LEU  HB2     3   0.900000E-01   1.00800           0   0.00000     -0.301140E-02
    3226 1S   222  LEU  CG     22  -0.900000E-01   12.0110           0   0.00000     -0.301140E-02
    3227 1S   222  LEU  HG      3   0.900000E-01   1.00800           0   0.00000     -0.301140E-02
    3228 1S   222  LEU  CD1    24  -0.270000       12.0110           0   0.00000     -0.301140E-02
    3229 1S   222  LEU  HD11    3   0.900000E-01   1.00800           0   0.00000     -0.301140E-02
    3230 1S   222  LEU  HD12    3   0.900000E-01   1.00800           0   0.00000     -0.301140E-02
    3231 1S   222  LEU  HD13    3   0.900000E-01   1.00800           0   0.00000     -0.301140E-02
    3232 1S   222  LEU  CD2    24  -0.270000       12.0110           0   0.00000     -0.301140E-02
    3233 1S   222  LEU  HD21    3   0.900000E-01   1.00800           0   0.00000     -0.301140E-02
    3234 1S   222  LEU  HD22    3   0.900000E-01   1.00800           0   0.00000     -0.301140E-02
    3235 1S   222  LEU  HD23    3   0.900000E-01   1.00800           0   0.00000     -0.301140E-02
    3236 1S   222  LEU  C      20   0.510000       12.0110           0   0.00000     -0.301140E-02
    3237 1S   222  LEU  O      70  -0.510000       15.9990           0   0.00000     -0.301140E-02
    3238 1S   223  ILE  N      54  -0.470000       14.0070           0   0.00000     -0.301140E-02
    3239 1S   223  ILE  HN      1   0.310000       1.00800           0   0.00000     -0.301140E-02
    3240 1S   223  ILE  CA     22   0.700000E-01   12.0110           0   0.00000     -0.301140E-02
    3241 1S   223  ILE  HA      6   0.900000E-01   1.00800           0   0.00000     -0.301140E-02
    3242 1S   223  ILE  CB     22  -0.900000E-01   12.0110           0   0.00000     -0.301140E-02
    3243 1S   223  ILE  HB      3   0.900000E-01   1.00800           0   0.00000     -0.301140E-02
    3244 1S   223  ILE  CG2    24  -0.270000       12.0110           0   0.00000     -0.301140E-02
    3245 1S   223  ILE  HG21    3   0.900000E-01   1.00800           0   0.00000     -0.301140E-02
    3246 1S   223  ILE  HG22    3   0.900000E-01   1.00800           0   0.00000     -0.301140E-02
    3247 1S   223  ILE  HG23    3   0.900000E-01   1.00800           0   0.00000     -0.301140E-02
    3248 1S   223  ILE  CG1    23  -0.180000       12.0110           0   0.00000     -0.301140E-02
    3249 1S   223  ILE  HG11    3   0.900000E-01   1.00800           0   0.00000     -0.301140E-02
    3250 1S   223  ILE  HG12    3   0.900000E-01   1.00800           0   0.00000     -0.301140E-02
    3251 1S   223  ILE  CD     24  -0.270000       12.0110           0   0.00000     -0.301140E-02
    3252 1S   223  ILE  HD1     3   0.900000E-01   1.00800           0   0.00000     -0.301140E-02
    3253 1S   223  ILE  HD2     3   0.900000E-01   1.00800           0   0.00000     -0.301140E-02
    3254 1S   223  ILE  HD3     3   0.900000E-01   1.00800           0   0.00000     -0.301140E-02
    3255 1S   223  ILE  C      20   0.510000       12.0110           0   0.00000     -0.301140E-02
    3256 1S   223  ILE  O      70  -0.510000       15.9990           0   0.00000     -0.301140E-02
    3257 1S   224  GLU  N      54  -0.470000       14.0070           0   0.00000     -0.301140E-02
    3258 1S   224  GLU  HN      1   0.310000       1.00800           0   0.00000     -0.301140E-02
    3259 1S   224  GLU  CA     22   0.700000E-01   12.0110           0   0.00000     -0.301140E-02
    3260 1S   224  GLU  HA      6   0.900000E-01   1.00800           0   0.00000     -0.301140E-02
    3261 1S   224  GLU  CB     23  -0.180000       12.0110           0   0.00000     -0.301140E-02
    3262 1S   224  GLU  HB1     3   0.900000E-01   1.00800           0   0.00000     -0.301140E-02
    3263 1S   224  GLU  HB2     3   0.900000E-01   1.00800           0   0.00000     -0.301140E-02
    3264 1S   224  GLU  CG     23  -0.280000       12.0110           0   0.00000     -0.301140E-02
    3265 1S   224  GLU  HG1     3   0.900000E-01   1.00800           0   0.00000     -0.301140E-02
    3266 1S   224  GLU  HG2     3   0.900000E-01   1.00800           0   0.00000     -0.301140E-02
    3267 1S   224  GLU  CD     32   0.620000       12.0110           0   0.00000     -0.301140E-02
    3268 1S   224  GLU  OE1    72  -0.760000       15.9990           0   0.00000     -0.301140E-02
    3269 1S   224  GLU  OE2    72  -0.760000       15.9990           0   0.00000     -0.301140E-02
    3270 1S   224  GLU  C      20   0.510000       12.0110           0   0.00000     -0.301140E-02
    3271 1S   224  GLU  O      70  -0.510000       15.9990           0   0.00000     -0.301140E-02
    3272 1S   225  ASP  N      54  -0.470000       14.0070           0   0.00000     -0.301140E-02
    3273 1S   225  ASP  HN      1   0.310000       1.00800           0   0.00000     -0.301140E-02
    3274 1S   225  ASP  CA     22   0.700000E-01   12.0110           0   0.00000     -0.301140E-02
    3275 1S   225  ASP  HA      6   0.900000E-01   1.00800           0   0.00000     -0.301140E-02
    3276 1S   225  ASP  CB     23  -0.280000       12.0110           0   0.00000     -0.301140E-02
    3277 1S   225  ASP  HB1     3   0.900000E-01   1.00800           0   0.00000     -0.301140E-02
    3278 1S   225  ASP  HB2     3   0.900000E-01   1.00800           0   0.00000     -0.301140E-02
    3279 1S   225  ASP  CG     32   0.620000       12.0110           0   0.00000     -0.301140E-02
    3280 1S   225  ASP  OD1    72  -0.760000       15.9990           0   0.00000     -0.301140E-02
    3281 1S   225  ASP  OD2    72  -0.760000       15.9990           0   0.00000     -0.301140E-02
    3282 1S   225  ASP  C      20   0.510000       12.0110           0   0.00000     -0.301140E-02
    3283 1S   225  ASP  O      70  -0.510000       15.9990           0   0.00000     -0.301140E-02
    3284 1S   226  VAL  N      54  -0.470000       14.0070           0   0.00000     -0.301140E-02
    3285 1S   226  VAL  HN      1   0.310000       1.00800           0   0.00000     -0.301140E-02
    3286 1S   226  VAL  CA     22   0.700000E-01   12.0110           0   0.00000     -0.301140E-02
    3287 1S   226  VAL  HA      6   0.900000E-01   1.00800           0   0.00000     -0.301140E-02
    3288 1S   226  VAL  CB     22  -0.900000E-01   12.0110           0   0.00000     -0.301140E-02
    3289 1S   226  VAL  HB      3   0.900000E-01   1.00800           0   0.00000     -0.301140E-02
    3290 1S   226  VAL  CG1    24  -0.270000       12.0110           0   0.00000     -0.301140E-02
    3291 1S   226  VAL  HG11    3   0.900000E-01   1.00800           0   0.00000     -0.301140E-02
    3292 1S   226  VAL  HG12    3   0.900000E-01   1.00800           0   0.00000     -0.301140E-02
    3293 1S   226  VAL  HG13    3   0.900000E-01   1.00800           0   0.00000     -0.301140E-02
    3294 1S   226  VAL  CG2    24  -0.270000       12.0110           0   0.00000     -0.301140E-02
    3295 1S   226  VAL  HG21    3   0.900000E-01   1.00800           0   0.00000     -0.301140E-02
    3296 1S   226  VAL  HG22    3   0.900000E-01   1.00800           0   0.00000     -0.301140E-02
    3297 1S   226  VAL  HG23    3   0.900000E-01   1.00800           0   0.00000     -0.301140E-02
    3298 1S   226  VAL  C      20   0.510000       12.0110           0   0.00000     -0.301140E-02
    3299 1S   226  VAL  O      70  -0.510000       15.9990           0   0.00000     -0.301140E-02
    3300 1S   227  GLU  N      54  -0.470000       14.0070           0   0.00000     -0.301140E-02
    3301 1S   227  GLU  HN      1   0.310000       1.00800           0   0.00000     -0.301140E-02
    3302 1S   227  GLU  CA     22   0.700000E-01   12.0110           0   0.00000     -0.301140E-02
    3303 1S   227  GLU  HA      6   0.900000E-01   1.00800           0   0.00000     -0.301140E-02
    3304 1S   227  GLU  CB     23  -0.180000       12.0110           0   0.00000     -0.301140E-02
    3305 1S   227  GLU  HB1     3   0.900000E-01   1.00800           0   0.00000     -0.301140E-02
    3306 1S   227  GLU  HB2     3   0.900000E-01   1.00800           0   0.00000     -0.301140E-02
    3307 1S   227  GLU  CG     23  -0.280000       12.0110           0   0.00000     -0.301140E-02
    3308 1S   227  GLU  HG1     3   0.900000E-01   1.00800           0   0.00000     -0.301140E-02
    3309 1S   227  GLU  HG2     3   0.900000E-01   1.00800           0   0.00000     -0.301140E-02
    3310 1S   227  GLU  CD     32   0.620000       12.0110           0   0.00000     -0.301140E-02
    3311 1S   227  GLU  OE1    72  -0.760000       15.9990           0   0.00000     -0.301140E-02
    3312 1S   227  GLU  OE2    72  -0.760000       15.9990           0   0.00000     -0.301140E-02
    3313 1S   227  GLU  C      20   0.510000       12.0110           0   0.00000     -0.301140E-02
    3314 1S   227  GLU  O      70  -0.510000       15.9990           0   0.00000     -0.301140E-02
    3315 1S   228  HSD  N      54  -0.470000       14.0070           0   0.00000     -0.301140E-02
    3316 1S   228  HSD  HN      1   0.310000       1.00800           0   0.00000     -0.301140E-02
    3317 1S   228  HSD  CA     22   0.700000E-01   12.0110           0   0.00000     -0.301140E-02
    3318 1S   228  HSD  HA      6   0.900000E-01   1.00800           0   0.00000     -0.301140E-02
    3319 1S   228  HSD  CB     23  -0.900000E-01   12.0110           0   0.00000     -0.301140E-02
    3320 1S   228  HSD  HB1     3   0.900000E-01   1.00800           0   0.00000     -0.301140E-02
    3321 1S   228  HSD  HB2     3   0.900000E-01   1.00800           0   0.00000     -0.301140E-02
    3322 1S   228  HSD  ND1    51  -0.360000       14.0070           0   0.00000     -0.301140E-02
    3323 1S   228  HSD  HD1     1   0.320000       1.00800           0   0.00000     -0.301140E-02
    3324 1S   228  HSD  CG     25  -0.500000E-01   12.0110           0   0.00000     -0.301140E-02
    3325 1S   228  HSD  CE1    26   0.250000       12.0110           0   0.00000     -0.301140E-02
    3326 1S   228  HSD  HE1     7   0.130000       1.00800           0   0.00000     -0.301140E-02
    3327 1S   228  HSD  NE2    52  -0.700000       14.0070           0   0.00000     -0.301140E-02
    3328 1S   228  HSD  CD2    25   0.220000       12.0110           0   0.00000     -0.301140E-02
    3329 1S   228  HSD  HD2     9   0.100000       1.00800           0   0.00000     -0.301140E-02
    3330 1S   228  HSD  C      20   0.510000       12.0110           0   0.00000     -0.301140E-02
    3331 1S   228  HSD  O      70  -0.510000       15.9990           0   0.00000     -0.301140E-02
    3332 1S   229  THR  N      54  -0.470000       14.0070           0   0.00000     -0.301140E-02
    3333 1S   229  THR  HN      1   0.310000       1.00800           0   0.00000     -0.301140E-02
    3334 1S   229  THR  CA     22   0.700000E-01   12.0110           0   0.00000     -0.301140E-02
    3335 1S   229  THR  HA      6   0.900000E-01   1.00800           0   0.00000     -0.301140E-02
    3336 1S   229  THR  CB     22   0.140000       12.0110           0   0.00000     -0.301140E-02
    3337 1S   229  THR  HB      3   0.900000E-01   1.00800           0   0.00000     -0.301140E-02
    3338 1S   229  THR  OG1    73  -0.660000       15.9990           0   0.00000     -0.301140E-02
    3339 1S   229  THR  HG1     1   0.430000       1.00800           0   0.00000     -0.301140E-02
    3340 1S   229  THR  CG2    24  -0.270000       12.0110           0   0.00000     -0.301140E-02
    3341 1S   229  THR  HG21    3   0.900000E-01   1.00800           0   0.00000     -0.301140E-02
    3342 1S   229  THR  HG22    3   0.900000E-01   1.00800           0   0.00000     -0.301140E-02
    3343 1S   229  THR  HG23    3   0.900000E-01   1.00800           0   0.00000     -0.301140E-02
    3344 1S   229  THR  C      20   0.510000       12.0110           0   0.00000     -0.301140E-02
    3345 1S   229  THR  O      70  -0.510000       15.9990           0   0.00000     -0.301140E-02
    3346 1S   230  PHE  N      54  -0.470000       14.0070           0   0.00000     -0.301140E-02
    3347 1S   230  PHE  HN      1   0.310000       1.00800           0   0.00000     -0.301140E-02
    3348 1S   230  PHE  CA     22   0.700000E-01   12.0110           0   0.00000     -0.301140E-02
    3349 1S   230  PHE  HA      6   0.900000E-01   1.00800           0   0.00000     -0.301140E-02
    3350 1S   230  PHE  CB     23  -0.180000       12.0110           0   0.00000     -0.301140E-02
    3351 1S   230  PHE  HB1     3   0.900000E-01   1.00800           0   0.00000     -0.301140E-02
    3352 1S   230  PHE  HB2     3   0.900000E-01   1.00800           0   0.00000     -0.301140E-02
    3353 1S   230  PHE  CG     21    0.00000       12.0110           0   0.00000     -0.301140E-02
    3354 1S   230  PHE  CD1    21  -0.115000       12.0110           0   0.00000     -0.301140E-02
    3355 1S   230  PHE  HD1     5   0.115000       1.00800           0   0.00000     -0.301140E-02
    3356 1S   230  PHE  CE1    21  -0.115000       12.0110           0   0.00000     -0.301140E-02
    3357 1S   230  PHE  HE1     5   0.115000       1.00800           0   0.00000     -0.301140E-02
    3358 1S   230  PHE  CZ     21  -0.115000       12.0110           0   0.00000     -0.301140E-02
    3359 1S   230  PHE  HZ      5   0.115000       1.00800           0   0.00000     -0.301140E-02
    3360 1S   230  PHE  CD2    21  -0.115000       12.0110           0   0.00000     -0.301140E-02
    3361 1S   230  PHE  HD2     5   0.115000       1.00800           0   0.00000     -0.301140E-02
    3362 1S   230  PHE  CE2    21  -0.115000       12.0110           0   0.00000     -0.301140E-02
    3363 1S   230  PHE  HE2     5   0.115000       1.00800           0   0.00000     -0.301140E-02
    3364 1S   230  PHE  C      20   0.510000       12.0110           0   0.00000     -0.301140E-02
    3365 1S   230  PHE  O      70  -0.510000       15.9990           0   0.00000     -0.301140E-02
    3366 1S   231  GLU  N      54  -0.470000       14.0070           0   0.00000     -0.301140E-02
    3367 1S   231  GLU  HN      1   0.310000       1.00800           0   0.00000     -0.301140E-02
    3368 1S   231  GLU  CA     22   0.700000E-01   12.0110           0   0.00000     -0.301140E-02
    3369 1S   231  GLU  HA      6   0.900000E-01   1.00800           0   0.00000     -0.301140E-02
    3370 1S   231  GLU  CB     23  -0.180000       12.0110           0   0.00000     -0.301140E-02
    3371 1S   231  GLU  HB1     3   0.900000E-01   1.00800           0   0.00000     -0.301140E-02
    3372 1S   231  GLU  HB2     3   0.900000E-01   1.00800           0   0.00000     -0.301140E-02
    3373 1S   231  GLU  CG     23  -0.280000       12.0110           0   0.00000     -0.301140E-02
    3374 1S   231  GLU  HG1     3   0.900000E-01   1.00800           0   0.00000     -0.301140E-02
    3375 1S   231  GLU  HG2     3   0.900000E-01   1.00800           0   0.00000     -0.301140E-02
    3376 1S   231  GLU  CD     32   0.620000       12.0110           0   0.00000     -0.301140E-02
    3377 1S   231  GLU  OE1    72  -0.760000       15.9990           0   0.00000     -0.301140E-02
    3378 1S   231  GLU  OE2    72  -0.760000       15.9990           0   0.00000     -0.301140E-02
    3379 1S   231  GLU  C      20   0.510000       12.0110           0   0.00000     -0.301140E-02
    3380 1S   231  GLU  O      70  -0.510000       15.9990           0   0.00000     -0.301140E-02
    3381 1S   232  GLU  N      54  -0.470000       14.0070           0   0.00000     -0.301140E-02
    3382 1S   232  GLU  HN      1   0.310000       1.00800           0   0.00000     -0.301140E-02
    3383 1S   232  GLU  CA     22   0.700000E-01   12.0110           0   0.00000     -0.301140E-02
    3384 1S   232  GLU  HA      6   0.900000E-01   1.00800           0   0.00000     -0.301140E-02
    3385 1S   232  GLU  CB     23  -0.180000       12.0110           0   0.00000     -0.301140E-02
    3386 1S   232  GLU  HB1     3   0.900000E-01   1.00800           0   0.00000     -0.301140E-02
    3387 1S   232  GLU  HB2     3   0.900000E-01   1.00800           0   0.00000     -0.301140E-02
    3388 1S   232  GLU  CG     23  -0.280000       12.0110           0   0.00000     -0.301140E-02
    3389 1S   232  GLU  HG1     3   0.900000E-01   1.00800           0   0.00000     -0.301140E-02
    3390 1S   232  GLU  HG2     3   0.900000E-01   1.00800           0   0.00000     -0.301140E-02
    3391 1S   232  GLU  CD     32   0.620000       12.0110           0   0.00000     -0.301140E-02
    3392 1S   232  GLU  OE1    72  -0.760000       15.9990           0   0.00000     -0.301140E-02
    3393 1S   232  GLU  OE2    72  -0.760000       15.9990           0   0.00000     -0.301140E-02
    3394 1S   232  GLU  C      20   0.510000       12.0110           0   0.00000     -0.301140E-02
    3395 1S   232  GLU  O      70  -0.510000       15.9990           0   0.00000     -0.301140E-02
    3396 1S   233  ILE  N      54  -0.470000       14.0070           0   0.00000     -0.301140E-02
    3397 1S   233  ILE  HN      1   0.310000       1.00800           0   0.00000     -0.301140E-02
    3398 1S   233  ILE  CA     22   0.700000E-01   12.0110           0   0.00000     -0.301140E-02
    3399 1S   233  ILE  HA      6   0.900000E-01   1.00800           0   0.00000     -0.301140E-02
    3400 1S   233  ILE  CB     22  -0.900000E-01   12.0110           0   0.00000     -0.301140E-02
    3401 1S   233  ILE  HB      3   0.900000E-01   1.00800           0   0.00000     -0.301140E-02
    3402 1S   233  ILE  CG2    24  -0.270000       12.0110           0   0.00000     -0.301140E-02
    3403 1S   233  ILE  HG21    3   0.900000E-01   1.00800           0   0.00000     -0.301140E-02
    3404 1S   233  ILE  HG22    3   0.900000E-01   1.00800           0   0.00000     -0.301140E-02
    3405 1S   233  ILE  HG23    3   0.900000E-01   1.00800           0   0.00000     -0.301140E-02
    3406 1S   233  ILE  CG1    23  -0.180000       12.0110           0   0.00000     -0.301140E-02
    3407 1S   233  ILE  HG11    3   0.900000E-01   1.00800           0   0.00000     -0.301140E-02
    3408 1S   233  ILE  HG12    3   0.900000E-01   1.00800           0   0.00000     -0.301140E-02
    3409 1S   233  ILE  CD     24  -0.270000       12.0110           0   0.00000     -0.301140E-02
    3410 1S   233  ILE  HD1     3   0.900000E-01   1.00800           0   0.00000     -0.301140E-02
    3411 1S   233  ILE  HD2     3   0.900000E-01   1.00800           0   0.00000     -0.301140E-02
    3412 1S   233  ILE  HD3     3   0.900000E-01   1.00800           0   0.00000     -0.301140E-02
    3413 1S   233  ILE  C      20   0.510000       12.0110           0   0.00000     -0.301140E-02
    3414 1S   233  ILE  O      70  -0.510000       15.9990           0   0.00000     -0.301140E-02
    3415 1S   234  LYS  N      54  -0.470000       14.0070           0   0.00000     -0.301140E-02
    3416 1S   234  LYS  HN      1   0.310000       1.00800           0   0.00000     -0.301140E-02
    3417 1S   234  LYS  CA     22   0.700000E-01   12.0110           0   0.00000     -0.301140E-02
    3418 1S   234  LYS  HA      6   0.900000E-01   1.00800           0   0.00000     -0.301140E-02
    3419 1S   234  LYS  CB     23  -0.180000       12.0110           0   0.00000     -0.301140E-02
    3420 1S   234  LYS  HB1     3   0.900000E-01   1.00800           0   0.00000     -0.301140E-02
    3421 1S   234  LYS  HB2     3   0.900000E-01   1.00800           0   0.00000     -0.301140E-02
    3422 1S   234  LYS  CG     23  -0.180000       12.0110           0   0.00000     -0.301140E-02
    3423 1S   234  LYS  HG1     3   0.900000E-01   1.00800           0   0.00000     -0.301140E-02
    3424 1S   234  LYS  HG2     3   0.900000E-01   1.00800           0   0.00000     -0.301140E-02
    3425 1S   234  LYS  CD     23  -0.180000       12.0110           0   0.00000     -0.301140E-02
    3426 1S   234  LYS  HD1     3   0.900000E-01   1.00800           0   0.00000     -0.301140E-02
    3427 1S   234  LYS  HD2     3   0.900000E-01   1.00800           0   0.00000     -0.301140E-02
    3428 1S   234  LYS  CE     23   0.210000       12.0110           0   0.00000     -0.301140E-02
    3429 1S   234  LYS  HE1     3   0.500000E-01   1.00800           0   0.00000     -0.301140E-02
    3430 1S   234  LYS  HE2     3   0.500000E-01   1.00800           0   0.00000     -0.301140E-02
    3431 1S   234  LYS  NZ     56  -0.300000       14.0070           0   0.00000     -0.301140E-02
    3432 1S   234  LYS  HZ1     2   0.330000       1.00800           0   0.00000     -0.301140E-02
    3433 1S   234  LYS  HZ2     2   0.330000       1.00800           0   0.00000     -0.301140E-02
    3434 1S   234  LYS  HZ3     2   0.330000       1.00800           0   0.00000     -0.301140E-02
    3435 1S   234  LYS  C      20   0.510000       12.0110           0   0.00000     -0.301140E-02
    3436 1S   234  LYS  O      70  -0.510000       15.9990           0   0.00000     -0.301140E-02
    3437 1S   235  PRO  N      50  -0.290000       14.0070           0   0.00000     -0.301140E-02
    3438 1S   235  PRO  CD     31    0.00000       12.0110           0   0.00000     -0.301140E-02
    3439 1S   235  PRO  HD1     3   0.900000E-01   1.00800           0   0.00000     -0.301140E-02
    3440 1S   235  PRO  HD2     3   0.900000E-01   1.00800           0   0.00000     -0.301140E-02
    3441 1S   235  PRO  CA     29   0.200000E-01   12.0110           0   0.00000     -0.301140E-02
    3442 1S   235  PRO  HA      6   0.900000E-01   1.00800           0   0.00000     -0.301140E-02
    3443 1S   235  PRO  CB     30  -0.180000       12.0110           0   0.00000     -0.301140E-02
    3444 1S   235  PRO  HB1     3   0.900000E-01   1.00800           0   0.00000     -0.301140E-02
    3445 1S   235  PRO  HB2     3   0.900000E-01   1.00800           0   0.00000     -0.301140E-02
    3446 1S   235  PRO  CG     30  -0.180000       12.0110           0   0.00000     -0.301140E-02
    3447 1S   235  PRO  HG1     3   0.900000E-01   1.00800           0   0.00000     -0.301140E-02
    3448 1S   235  PRO  HG2     3   0.900000E-01   1.00800           0   0.00000     -0.301140E-02
    3449 1S   235  PRO  C      20   0.510000       12.0110           0   0.00000     -0.301140E-02
    3450 1S   235  PRO  O      70  -0.510000       15.9990           0   0.00000     -0.301140E-02
    3451 1S   236  LEU  N      54  -0.470000       14.0070           0   0.00000     -0.301140E-02
    3452 1S   236  LEU  HN      1   0.310000       1.00800           0   0.00000     -0.301140E-02
    3453 1S   236  LEU  CA     22   0.700000E-01   12.0110           0   0.00000     -0.301140E-02
    3454 1S   236  LEU  HA      6   0.900000E-01   1.00800           0   0.00000     -0.301140E-02
    3455 1S   236  LEU  CB     23  -0.180000       12.0110           0   0.00000     -0.301140E-02
    3456 1S   236  LEU  HB1     3   0.900000E-01   1.00800           0   0.00000     -0.301140E-02
    3457 1S   236  LEU  HB2     3   0.900000E-01   1.00800           0   0.00000     -0.301140E-02
    3458 1S   236  LEU  CG     22  -0.900000E-01   12.0110           0   0.00000     -0.301140E-02
    3459 1S   236  LEU  HG      3   0.900000E-01   1.00800           0   0.00000     -0.301140E-02
    3460 1S   236  LEU  CD1    24  -0.270000       12.0110           0   0.00000     -0.301140E-02
    3461 1S   236  LEU  HD11    3   0.900000E-01   1.00800           0   0.00000     -0.301140E-02
    3462 1S   236  LEU  HD12    3   0.900000E-01   1.00800           0   0.00000     -0.301140E-02
    3463 1S   236  LEU  HD13    3   0.900000E-01   1.00800           0   0.00000     -0.301140E-02
    3464 1S   236  LEU  CD2    24  -0.270000       12.0110           0   0.00000     -0.301140E-02
    3465 1S   236  LEU  HD21    3   0.900000E-01   1.00800           0   0.00000     -0.301140E-02
    3466 1S   236  LEU  HD22    3   0.900000E-01   1.00800           0   0.00000     -0.301140E-02
    3467 1S   236  LEU  HD23    3   0.900000E-01   1.00800           0   0.00000     -0.301140E-02
    3468 1S   236  LEU  C      20   0.510000       12.0110           0   0.00000     -0.301140E-02
    3469 1S   236  LEU  O      70  -0.510000       15.9990           0   0.00000     -0.301140E-02
    3470 1S   237  TYR  N      54  -0.470000       14.0070           0   0.00000     -0.301140E-02
    3471 1S   237  TYR  HN      1   0.310000       1.00800           0   0.00000     -0.301140E-02
    3472 1S   237  TYR  CA     22   0.700000E-01   12.0110           0   0.00000     -0.301140E-02
    3473 1S   237  TYR  HA      6   0.900000E-01   1.00800           0   0.00000     -0.301140E-02
    3474 1S   237  TYR  CB     23  -0.180000       12.0110           0   0.00000     -0.301140E-02
    3475 1S   237  TYR  HB1     3   0.900000E-01   1.00800           0   0.00000     -0.301140E-02
    3476 1S   237  TYR  HB2     3   0.900000E-01   1.00800           0   0.00000     -0.301140E-02
    3477 1S   237  TYR  CG     21    0.00000       12.0110           0   0.00000     -0.301140E-02
    3478 1S   237  TYR  CD1    21  -0.115000       12.0110           0   0.00000     -0.301140E-02
    3479 1S   237  TYR  HD1     5   0.115000       1.00800           0   0.00000     -0.301140E-02
    3480 1S   237  TYR  CE1    21  -0.115000       12.0110           0   0.00000     -0.301140E-02
    3481 1S   237  TYR  HE1     5   0.115000       1.00800           0   0.00000     -0.301140E-02
    3482 1S   237  TYR  CZ     21   0.110000       12.0110           0   0.00000     -0.301140E-02
    3483 1S   237  TYR  OH     73  -0.540000       15.9990           0   0.00000     -0.301140E-02
    3484 1S   237  TYR  HH      1   0.430000       1.00800           0   0.00000     -0.301140E-02
    3485 1S   237  TYR  CD2    21  -0.115000       12.0110           0   0.00000     -0.301140E-02
    3486 1S   237  TYR  HD2     5   0.115000       1.00800           0   0.00000     -0.301140E-02
    3487 1S   237  TYR  CE2    21  -0.115000       12.0110           0   0.00000     -0.301140E-02
    3488 1S   237  TYR  HE2     5   0.115000       1.00800           0   0.00000     -0.301140E-02
    3489 1S   237  TYR  C      20   0.510000       12.0110           0   0.00000     -0.301140E-02
    3490 1S   237  TYR  O      70  -0.510000       15.9990           0   0.00000     -0.301140E-02
    3491 1S   238  GLU  N      54  -0.470000       14.0070           0   0.00000     -0.301140E-02
    3492 1S   238  GLU  HN      1   0.310000       1.00800           0   0.00000     -0.301140E-02
    3493 1S   238  GLU  CA     22   0.700000E-01   12.0110           0   0.00000     -0.301140E-02
    3494 1S   238  GLU  HA      6   0.900000E-01   1.00800           0   0.00000     -0.301140E-02
    3495 1S   238  GLU  CB     23  -0.180000       12.0110           0   0.00000     -0.301140E-02
    3496 1S   238  GLU  HB1     3   0.900000E-01   1.00800           0   0.00000     -0.301140E-02
    3497 1S   238  GLU  HB2     3   0.900000E-01   1.00800           0   0.00000     -0.301140E-02
    3498 1S   238  GLU  CG     23  -0.280000       12.0110           0   0.00000     -0.301140E-02
    3499 1S   238  GLU  HG1     3   0.900000E-01   1.00800           0   0.00000     -0.301140E-02
    3500 1S   238  GLU  HG2     3   0.900000E-01   1.00800           0   0.00000     -0.301140E-02
    3501 1S   238  GLU  CD     32   0.620000       12.0110           0   0.00000     -0.301140E-02
    3502 1S   238  GLU  OE1    72  -0.760000       15.9990           0   0.00000     -0.301140E-02
    3503 1S   238  GLU  OE2    72  -0.760000       15.9990           0   0.00000     -0.301140E-02
    3504 1S   238  GLU  C      20   0.510000       12.0110           0   0.00000     -0.301140E-02
    3505 1S   238  GLU  O      70  -0.510000       15.9990           0   0.00000     -0.301140E-02
    3506 1S   239  HSD  N      54  -0.470000       14.0070           0   0.00000     -0.301140E-02
    3507 1S   239  HSD  HN      1   0.310000       1.00800           0   0.00000     -0.301140E-02
    3508 1S   239  HSD  CA     22   0.700000E-01   12.0110           0   0.00000     -0.301140E-02
    3509 1S   239  HSD  HA      6   0.900000E-01   1.00800           0   0.00000     -0.301140E-02
    3510 1S   239  HSD  CB     23  -0.900000E-01   12.0110           0   0.00000     -0.301140E-02
    3511 1S   239  HSD  HB1     3   0.900000E-01   1.00800           0   0.00000     -0.301140E-02
    3512 1S   239  HSD  HB2     3   0.900000E-01   1.00800           0   0.00000     -0.301140E-02
    3513 1S   239  HSD  ND1    51  -0.360000       14.0070           0   0.00000     -0.301140E-02
    3514 1S   239  HSD  HD1     1   0.320000       1.00800           0   0.00000     -0.301140E-02
    3515 1S   239  HSD  CG     25  -0.500000E-01   12.0110           0   0.00000     -0.301140E-02
    3516 1S   239  HSD  CE1    26   0.250000       12.0110           0   0.00000     -0.301140E-02
    3517 1S   239  HSD  HE1     7   0.130000       1.00800           0   0.00000     -0.301140E-02
    3518 1S   239  HSD  NE2    52  -0.700000       14.0070           0   0.00000     -0.301140E-02
    3519 1S   239  HSD  CD2    25   0.220000       12.0110           0   0.00000     -0.301140E-02
    3520 1S   239  HSD  HD2     9   0.100000       1.00800           0   0.00000     -0.301140E-02
    3521 1S   239  HSD  C      20   0.510000       12.0110           0   0.00000     -0.301140E-02
    3522 1S   239  HSD  O      70  -0.510000       15.9990           0   0.00000     -0.301140E-02
    3523 1S   240  LEU  N      54  -0.470000       14.0070           0   0.00000     -0.301140E-02
    3524 1S   240  LEU  HN      1   0.310000       1.00800           0   0.00000     -0.301140E-02
    3525 1S   240  LEU  CA     22   0.700000E-01   12.0110           0   0.00000     -0.301140E-02
    3526 1S   240  LEU  HA      6   0.900000E-01   1.00800           0   0.00000     -0.301140E-02
    3527 1S   240  LEU  CB     23  -0.180000       12.0110           0   0.00000     -0.301140E-02
    3528 1S   240  LEU  HB1     3   0.900000E-01   1.00800           0   0.00000     -0.301140E-02
    3529 1S   240  LEU  HB2     3   0.900000E-01   1.00800           0   0.00000     -0.301140E-02
    3530 1S   240  LEU  CG     22  -0.900000E-01   12.0110           0   0.00000     -0.301140E-02
    3531 1S   240  LEU  HG      3   0.900000E-01   1.00800           0   0.00000     -0.301140E-02
    3532 1S   240  LEU  CD1    24  -0.270000       12.0110           0   0.00000     -0.301140E-02
    3533 1S   240  LEU  HD11    3   0.900000E-01   1.00800           0   0.00000     -0.301140E-02
    3534 1S   240  LEU  HD12    3   0.900000E-01   1.00800           0   0.00000     -0.301140E-02
    3535 1S   240  LEU  HD13    3   0.900000E-01   1.00800           0   0.00000     -0.301140E-02
    3536 1S   240  LEU  CD2    24  -0.270000       12.0110           0   0.00000     -0.301140E-02
    3537 1S   240  LEU  HD21    3   0.900000E-01   1.00800           0   0.00000     -0.301140E-02
    3538 1S   240  LEU  HD22    3   0.900000E-01   1.00800           0   0.00000     -0.301140E-02
    3539 1S   240  LEU  HD23    3   0.900000E-01   1.00800           0   0.00000     -0.301140E-02
    3540 1S   240  LEU  C      20   0.510000       12.0110           0   0.00000     -0.301140E-02
    3541 1S   240  LEU  O      70  -0.510000       15.9990           0   0.00000     -0.301140E-02
    3542 1S   241  HSE  N      54  -0.470000       14.0070           0   0.00000     -0.301140E-02
    3543 1S   241  HSE  HN      1   0.310000       1.00800           0   0.00000     -0.301140E-02
    3544 1S   241  HSE  CA     22   0.700000E-01   12.0110           0   0.00000     -0.301140E-02
    3545 1S   241  HSE  HA      6   0.900000E-01   1.00800           0   0.00000     -0.301140E-02
    3546 1S   241  HSE  CB     23  -0.800000E-01   12.0110           0   0.00000     -0.301140E-02
    3547 1S   241  HSE  HB1     3   0.900000E-01   1.00800           0   0.00000     -0.301140E-02
    3548 1S   241  HSE  HB2     3   0.900000E-01   1.00800           0   0.00000     -0.301140E-02
    3549 1S   241  HSE  ND1    52  -0.700000       14.0070           0   0.00000     -0.301140E-02
    3550 1S   241  HSE  CG     25   0.220000       12.0110           0   0.00000     -0.301140E-02
    3551 1S   241  HSE  CE1    26   0.250000       12.0110           0   0.00000     -0.301140E-02
    3552 1S   241  HSE  HE1     7   0.130000       1.00800           0   0.00000     -0.301140E-02
    3553 1S   241  HSE  NE2    51  -0.360000       14.0070           0   0.00000     -0.301140E-02
    3554 1S   241  HSE  HE2     1   0.320000       1.00800           0   0.00000     -0.301140E-02
    3555 1S   241  HSE  CD2    25  -0.500000E-01   12.0110           0   0.00000     -0.301140E-02
    3556 1S   241  HSE  HD2     9   0.900000E-01   1.00800           0   0.00000     -0.301140E-02
    3557 1S   241  HSE  C      20   0.510000       12.0110           0   0.00000     -0.301140E-02
    3558 1S   241  HSE  O      70  -0.510000       15.9990           0   0.00000     -0.301140E-02
    3559 1S   242  ALA  N      54  -0.470000       14.0070           0   0.00000     -0.301140E-02
    3560 1S   242  ALA  HN      1   0.310000       1.00800           0   0.00000     -0.301140E-02
    3561 1S   242  ALA  CA     22   0.700000E-01   12.0110           0   0.00000     -0.301140E-02
    3562 1S   242  ALA  HA      6   0.900000E-01   1.00800           0   0.00000     -0.301140E-02
    3563 1S   242  ALA  CB     24  -0.270000       12.0110           0   0.00000     -0.301140E-02
    3564 1S   242  ALA  HB1     3   0.900000E-01   1.00800           0   0.00000     -0.301140E-02
    3565 1S   242  ALA  HB2     3   0.900000E-01   1.00800           0   0.00000     -0.301140E-02
    3566 1S   242  ALA  HB3     3   0.900000E-01   1.00800           0   0.00000     -0.301140E-02
    3567 1S   242  ALA  C      20   0.510000       12.0110           0   0.00000     -0.301140E-02
    3568 1S   242  ALA  O      70  -0.510000       15.9990           0   0.00000     -0.301140E-02
    3569 1S   243  TYR  N      54  -0.470000       14.0070           0   0.00000     -0.301140E-02
    3570 1S   243  TYR  HN      1   0.310000       1.00800           0   0.00000     -0.301140E-02
    3571 1S   243  TYR  CA     22   0.700000E-01   12.0110           0   0.00000     -0.301140E-02
    3572 1S   243  TYR  HA      6   0.900000E-01   1.00800           0   0.00000     -0.301140E-02
    3573 1S   243  TYR  CB     23  -0.180000       12.0110           0   0.00000     -0.301140E-02
    3574 1S   243  TYR  HB1     3   0.900000E-01   1.00800           0   0.00000     -0.301140E-02
    3575 1S   243  TYR  HB2     3   0.900000E-01   1.00800           0   0.00000     -0.301140E-02
    3576 1S   243  TYR  CG     21    0.00000       12.0110           0   0.00000     -0.301140E-02
    3577 1S   243  TYR  CD1    21  -0.115000       12.0110           0   0.00000     -0.301140E-02
    3578 1S   243  TYR  HD1     5   0.115000       1.00800           0   0.00000     -0.301140E-02
    3579 1S   243  TYR  CE1    21  -0.115000       12.0110           0   0.00000     -0.301140E-02
    3580 1S   243  TYR  HE1     5   0.115000       1.00800           0   0.00000     -0.301140E-02
    3581 1S   243  TYR  CZ     21   0.110000       12.0110           0   0.00000     -0.301140E-02
    3582 1S   243  TYR  OH     73  -0.540000       15.9990           0   0.00000     -0.301140E-02
    3583 1S   243  TYR  HH      1   0.430000       1.00800           0   0.00000     -0.301140E-02
    3584 1S   243  TYR  CD2    21  -0.115000       12.0110           0   0.00000     -0.301140E-02
    3585 1S   243  TYR  HD2     5   0.115000       1.00800           0   0.00000     -0.301140E-02
    3586 1S   243  TYR  CE2    21  -0.115000       12.0110           0   0.00000     -0.301140E-02
    3587 1S   243  TYR  HE2     5   0.115000       1.00800           0   0.00000     -0.301140E-02
    3588 1S   243  TYR  C      20   0.510000       12.0110           0   0.00000     -0.301140E-02
    3589 1S   243  TYR  O      70  -0.510000       15.9990           0   0.00000     -0.301140E-02
    3590 1S   244  VAL  N      54  -0.470000       14.0070           0   0.00000     -0.301140E-02
    3591 1S   244  VAL  HN      1   0.310000       1.00800           0   0.00000     -0.301140E-02
    3592 1S   244  VAL  CA     22   0.700000E-01   12.0110           0   0.00000     -0.301140E-02
    3593 1S   244  VAL  HA      6   0.900000E-01   1.00800           0   0.00000     -0.301140E-02
    3594 1S   244  VAL  CB     22  -0.900000E-01   12.0110           0   0.00000     -0.301140E-02
    3595 1S   244  VAL  HB      3   0.900000E-01   1.00800           0   0.00000     -0.301140E-02
    3596 1S   244  VAL  CG1    24  -0.270000       12.0110           0   0.00000     -0.301140E-02
    3597 1S   244  VAL  HG11    3   0.900000E-01   1.00800           0   0.00000     -0.301140E-02
    3598 1S   244  VAL  HG12    3   0.900000E-01   1.00800           0   0.00000     -0.301140E-02
    3599 1S   244  VAL  HG13    3   0.900000E-01   1.00800           0   0.00000     -0.301140E-02
    3600 1S   244  VAL  CG2    24  -0.270000       12.0110           0   0.00000     -0.301140E-02
    3601 1S   244  VAL  HG21    3   0.900000E-01   1.00800           0   0.00000     -0.301140E-02
    3602 1S   244  VAL  HG22    3   0.900000E-01   1.00800           0   0.00000     -0.301140E-02
    3603 1S   244  VAL  HG23    3   0.900000E-01   1.00800           0   0.00000     -0.301140E-02
    3604 1S   244  VAL  C      20   0.510000       12.0110           0   0.00000     -0.301140E-02
    3605 1S   244  VAL  O      70  -0.510000       15.9990           0   0.00000     -0.301140E-02
    3606 1S   245  ARG  N      54  -0.470000       14.0070           0   0.00000     -0.301140E-02
    3607 1S   245  ARG  HN      1   0.310000       1.00800           0   0.00000     -0.301140E-02
    3608 1S   245  ARG  CA     22   0.700000E-01   12.0110           0   0.00000     -0.301140E-02
    3609 1S   245  ARG  HA      6   0.900000E-01   1.00800           0   0.00000     -0.301140E-02
    3610 1S   245  ARG  CB     23  -0.180000       12.0110           0   0.00000     -0.301140E-02
    3611 1S   245  ARG  HB1     3   0.900000E-01   1.00800           0   0.00000     -0.301140E-02
    3612 1S   245  ARG  HB2     3   0.900000E-01   1.00800           0   0.00000     -0.301140E-02
    3613 1S   245  ARG  CG     23  -0.180000       12.0110           0   0.00000     -0.301140E-02
    3614 1S   245  ARG  HG1     3   0.900000E-01   1.00800           0   0.00000     -0.301140E-02
    3615 1S   245  ARG  HG2     3   0.900000E-01   1.00800           0   0.00000     -0.301140E-02
    3616 1S   245  ARG  CD     23   0.200000       12.0110           0   0.00000     -0.301140E-02
    3617 1S   245  ARG  HD1     3   0.900000E-01   1.00800           0   0.00000     -0.301140E-02
    3618 1S   245  ARG  HD2     3   0.900000E-01   1.00800           0   0.00000     -0.301140E-02
    3619 1S   245  ARG  NE     57  -0.700000       14.0070           0   0.00000     -0.301140E-02
    3620 1S   245  ARG  HE      2   0.440000       1.00800           0   0.00000     -0.301140E-02
    3621 1S   245  ARG  CZ     20   0.640000       12.0110           0   0.00000     -0.301140E-02
    3622 1S   245  ARG  NH1    57  -0.800000       14.0070           0   0.00000     -0.301140E-02
    3623 1S   245  ARG  HH11    2   0.460000       1.00800           0   0.00000     -0.301140E-02
    3624 1S   245  ARG  HH12    2   0.460000       1.00800           0   0.00000     -0.301140E-02
    3625 1S   245  ARG  NH2    57  -0.800000       14.0070           0   0.00000     -0.301140E-02
    3626 1S   245  ARG  HH21    2   0.460000       1.00800           0   0.00000     -0.301140E-02
    3627 1S   245  ARG  HH22    2   0.460000       1.00800           0   0.00000     -0.301140E-02
    3628 1S   245  ARG  C      20   0.510000       12.0110           0   0.00000     -0.301140E-02
    3629 1S   245  ARG  O      70  -0.510000       15.9990           0   0.00000     -0.301140E-02
    3630 1S   246  ALA  N      54  -0.470000       14.0070           0   0.00000     -0.301140E-02
    3631 1S   246  ALA  HN      1   0.310000       1.00800           0   0.00000     -0.301140E-02
    3632 1S   246  ALA  CA     22   0.700000E-01   12.0110           0   0.00000     -0.301140E-02
    3633 1S   246  ALA  HA      6   0.900000E-01   1.00800           0   0.00000     -0.301140E-02
    3634 1S   246  ALA  CB     24  -0.270000       12.0110           0   0.00000     -0.301140E-02
    3635 1S   246  ALA  HB1     3   0.900000E-01   1.00800           0   0.00000     -0.301140E-02
    3636 1S   246  ALA  HB2     3   0.900000E-01   1.00800           0   0.00000     -0.301140E-02
    3637 1S   246  ALA  HB3     3   0.900000E-01   1.00800           0   0.00000     -0.301140E-02
    3638 1S   246  ALA  C      20   0.510000       12.0110           0   0.00000     -0.301140E-02
    3639 1S   246  ALA  O      70  -0.510000       15.9990           0   0.00000     -0.301140E-02
    3640 1S   247  LYS  N      54  -0.470000       14.0070           0   0.00000     -0.301140E-02
    3641 1S   247  LYS  HN      1   0.310000       1.00800           0   0.00000     -0.301140E-02
    3642 1S   247  LYS  CA     22   0.700000E-01   12.0110           0   0.00000     -0.301140E-02
    3643 1S   247  LYS  HA      6   0.900000E-01   1.00800           0   0.00000     -0.301140E-02
    3644 1S   247  LYS  CB     23  -0.180000       12.0110           0   0.00000     -0.301140E-02
    3645 1S   247  LYS  HB1     3   0.900000E-01   1.00800           0   0.00000     -0.301140E-02
    3646 1S   247  LYS  HB2     3   0.900000E-01   1.00800           0   0.00000     -0.301140E-02
    3647 1S   247  LYS  CG     23  -0.180000       12.0110           0   0.00000     -0.301140E-02
    3648 1S   247  LYS  HG1     3   0.900000E-01   1.00800           0   0.00000     -0.301140E-02
    3649 1S   247  LYS  HG2     3   0.900000E-01   1.00800           0   0.00000     -0.301140E-02
    3650 1S   247  LYS  CD     23  -0.180000       12.0110           0   0.00000     -0.301140E-02
    3651 1S   247  LYS  HD1     3   0.900000E-01   1.00800           0   0.00000     -0.301140E-02
    3652 1S   247  LYS  HD2     3   0.900000E-01   1.00800           0   0.00000     -0.301140E-02
    3653 1S   247  LYS  CE     23   0.210000       12.0110           0   0.00000     -0.301140E-02
    3654 1S   247  LYS  HE1     3   0.500000E-01   1.00800           0   0.00000     -0.301140E-02
    3655 1S   247  LYS  HE2     3   0.500000E-01   1.00800           0   0.00000     -0.301140E-02
    3656 1S   247  LYS  NZ     56  -0.300000       14.0070           0   0.00000     -0.301140E-02
    3657 1S   247  LYS  HZ1     2   0.330000       1.00800           0   0.00000     -0.301140E-02
    3658 1S   247  LYS  HZ2     2   0.330000       1.00800           0   0.00000     -0.301140E-02
    3659 1S   247  LYS  HZ3     2   0.330000       1.00800           0   0.00000     -0.301140E-02
    3660 1S   247  LYS  C      20   0.510000       12.0110           0   0.00000     -0.301140E-02
    3661 1S   247  LYS  O      70  -0.510000       15.9990           0   0.00000     -0.301140E-02
    3662 1S   248  LEU  N      54  -0.470000       14.0070           0   0.00000     -0.301140E-02
    3663 1S   248  LEU  HN      1   0.310000       1.00800           0   0.00000     -0.301140E-02
    3664 1S   248  LEU  CA     22   0.700000E-01   12.0110           0   0.00000     -0.301140E-02
    3665 1S   248  LEU  HA      6   0.900000E-01   1.00800           0   0.00000     -0.301140E-02
    3666 1S   248  LEU  CB     23  -0.180000       12.0110           0   0.00000     -0.301140E-02
    3667 1S   248  LEU  HB1     3   0.900000E-01   1.00800           0   0.00000     -0.301140E-02
    3668 1S   248  LEU  HB2     3   0.900000E-01   1.00800           0   0.00000     -0.301140E-02
    3669 1S   248  LEU  CG     22  -0.900000E-01   12.0110           0   0.00000     -0.301140E-02
    3670 1S   248  LEU  HG      3   0.900000E-01   1.00800           0   0.00000     -0.301140E-02
    3671 1S   248  LEU  CD1    24  -0.270000       12.0110           0   0.00000     -0.301140E-02
    3672 1S   248  LEU  HD11    3   0.900000E-01   1.00800           0   0.00000     -0.301140E-02
    3673 1S   248  LEU  HD12    3   0.900000E-01   1.00800           0   0.00000     -0.301140E-02
    3674 1S   248  LEU  HD13    3   0.900000E-01   1.00800           0   0.00000     -0.301140E-02
    3675 1S   248  LEU  CD2    24  -0.270000       12.0110           0   0.00000     -0.301140E-02
    3676 1S   248  LEU  HD21    3   0.900000E-01   1.00800           0   0.00000     -0.301140E-02
    3677 1S   248  LEU  HD22    3   0.900000E-01   1.00800           0   0.00000     -0.301140E-02
    3678 1S   248  LEU  HD23    3   0.900000E-01   1.00800           0   0.00000     -0.301140E-02
    3679 1S   248  LEU  C      20   0.510000       12.0110           0   0.00000     -0.301140E-02
    3680 1S   248  LEU  O      70  -0.510000       15.9990           0   0.00000     -0.301140E-02
    3681 1S   249  MET  N      54  -0.470000       14.0070           0   0.00000     -0.301140E-02
    3682 1S   249  MET  HN      1   0.310000       1.00800           0   0.00000     -0.301140E-02
    3683 1S   249  MET  CA     22   0.700000E-01   12.0110           0   0.00000     -0.301140E-02
    3684 1S   249  MET  HA      6   0.900000E-01   1.00800           0   0.00000     -0.301140E-02
    3685 1S   249  MET  CB     23  -0.180000       12.0110           0   0.00000     -0.301140E-02
    3686 1S   249  MET  HB1     3   0.900000E-01   1.00800           0   0.00000     -0.301140E-02
    3687 1S   249  MET  HB2     3   0.900000E-01   1.00800           0   0.00000     -0.301140E-02
    3688 1S   249  MET  CG     23  -0.140000       12.0110           0   0.00000     -0.301140E-02
    3689 1S   249  MET  HG1     3   0.900000E-01   1.00800           0   0.00000     -0.301140E-02
    3690 1S   249  MET  HG2     3   0.900000E-01   1.00800           0   0.00000     -0.301140E-02
    3691 1S   249  MET  SD     81  -0.900000E-01   32.0600           0   0.00000     -0.301140E-02
    3692 1S   249  MET  CE     24  -0.220000       12.0110           0   0.00000     -0.301140E-02
    3693 1S   249  MET  HE1     3   0.900000E-01   1.00800           0   0.00000     -0.301140E-02
    3694 1S   249  MET  HE2     3   0.900000E-01   1.00800           0   0.00000     -0.301140E-02
    3695 1S   249  MET  HE3     3   0.900000E-01   1.00800           0   0.00000     -0.301140E-02
    3696 1S   249  MET  C      20   0.510000       12.0110           0   0.00000     -0.301140E-02
    3697 1S   249  MET  O      70  -0.510000       15.9990           0   0.00000     -0.301140E-02
    3698 1S   250  ASN  N      54  -0.470000       14.0070           0   0.00000     -0.301140E-02
    3699 1S   250  ASN  HN      1   0.310000       1.00800           0   0.00000     -0.301140E-02
    3700 1S   250  ASN  CA     22   0.700000E-01   12.0110           0   0.00000     -0.301140E-02
    3701 1S   250  ASN  HA      6   0.900000E-01   1.00800           0   0.00000     -0.301140E-02
    3702 1S   250  ASN  CB     23  -0.180000       12.0110           0   0.00000     -0.301140E-02
    3703 1S   250  ASN  HB1     3   0.900000E-01   1.00800           0   0.00000     -0.301140E-02
    3704 1S   250  ASN  HB2     3   0.900000E-01   1.00800           0   0.00000     -0.301140E-02
    3705 1S   250  ASN  CG     32   0.550000       12.0110           0   0.00000     -0.301140E-02
    3706 1S   250  ASN  OD1    70  -0.550000       15.9990           0   0.00000     -0.301140E-02
    3707 1S   250  ASN  ND2    55  -0.620000       14.0070           0   0.00000     -0.301140E-02
    3708 1S   250  ASN  HD21    1   0.320000       1.00800           0   0.00000     -0.301140E-02
    3709 1S   250  ASN  HD22    1   0.300000       1.00800           0   0.00000     -0.301140E-02
    3710 1S   250  ASN  C      20   0.510000       12.0110           0   0.00000     -0.301140E-02
    3711 1S   250  ASN  O      70  -0.510000       15.9990           0   0.00000     -0.301140E-02
    3712 1S   251  ALA  N      54  -0.470000       14.0070           0   0.00000     -0.301140E-02
    3713 1S   251  ALA  HN      1   0.310000       1.00800           0   0.00000     -0.301140E-02
    3714 1S   251  ALA  CA     22   0.700000E-01   12.0110           0   0.00000     -0.301140E-02
    3715 1S   251  ALA  HA      6   0.900000E-01   1.00800           0   0.00000     -0.301140E-02
    3716 1S   251  ALA  CB     24  -0.270000       12.0110           0   0.00000     -0.301140E-02
    3717 1S   251  ALA  HB1     3   0.900000E-01   1.00800           0   0.00000     -0.301140E-02
    3718 1S   251  ALA  HB2     3   0.900000E-01   1.00800           0   0.00000     -0.301140E-02
    3719 1S   251  ALA  HB3     3   0.900000E-01   1.00800           0   0.00000     -0.301140E-02
    3720 1S   251  ALA  C      20   0.510000       12.0110           0   0.00000     -0.301140E-02
    3721 1S   251  ALA  O      70  -0.510000       15.9990           0   0.00000     -0.301140E-02
    3722 1S   252  TYR  N      54  -0.470000       14.0070           0   0.00000     -0.301140E-02
    3723 1S   252  TYR  HN      1   0.310000       1.00800           0   0.00000     -0.301140E-02
    3724 1S   252  TYR  CA     22   0.700000E-01   12.0110           0   0.00000     -0.301140E-02
    3725 1S   252  TYR  HA      6   0.900000E-01   1.00800           0   0.00000     -0.301140E-02
    3726 1S   252  TYR  CB     23  -0.180000       12.0110           0   0.00000     -0.301140E-02
    3727 1S   252  TYR  HB1     3   0.900000E-01   1.00800           0   0.00000     -0.301140E-02
    3728 1S   252  TYR  HB2     3   0.900000E-01   1.00800           0   0.00000     -0.301140E-02
    3729 1S   252  TYR  CG     21    0.00000       12.0110           0   0.00000     -0.301140E-02
    3730 1S   252  TYR  CD1    21  -0.115000       12.0110           0   0.00000     -0.301140E-02
    3731 1S   252  TYR  HD1     5   0.115000       1.00800           0   0.00000     -0.301140E-02
    3732 1S   252  TYR  CE1    21  -0.115000       12.0110           0   0.00000     -0.301140E-02
    3733 1S   252  TYR  HE1     5   0.115000       1.00800           0   0.00000     -0.301140E-02
    3734 1S   252  TYR  CZ     21   0.110000       12.0110           0   0.00000     -0.301140E-02
    3735 1S   252  TYR  OH     73  -0.540000       15.9990           0   0.00000     -0.301140E-02
    3736 1S   252  TYR  HH      1   0.430000       1.00800           0   0.00000     -0.301140E-02
    3737 1S   252  TYR  CD2    21  -0.115000       12.0110           0   0.00000     -0.301140E-02
    3738 1S   252  TYR  HD2     5   0.115000       1.00800           0   0.00000     -0.301140E-02
    3739 1S   252  TYR  CE2    21  -0.115000       12.0110           0   0.00000     -0.301140E-02
    3740 1S   252  TYR  HE2     5   0.115000       1.00800           0   0.00000     -0.301140E-02
    3741 1S   252  TYR  C      20   0.510000       12.0110           0   0.00000     -0.301140E-02
    3742 1S   252  TYR  O      70  -0.510000       15.9990           0   0.00000     -0.301140E-02
    3743 1S   253  PRO  N      50  -0.290000       14.0070           0   0.00000     -0.301140E-02
    3744 1S   253  PRO  CD     31    0.00000       12.0110           0   0.00000     -0.301140E-02
    3745 1S   253  PRO  HD1     3   0.900000E-01   1.00800           0   0.00000     -0.301140E-02
    3746 1S   253  PRO  HD2     3   0.900000E-01   1.00800           0   0.00000     -0.301140E-02
    3747 1S   253  PRO  CA     29   0.200000E-01   12.0110           0   0.00000     -0.301140E-02
    3748 1S   253  PRO  HA      6   0.900000E-01   1.00800           0   0.00000     -0.301140E-02
    3749 1S   253  PRO  CB     30  -0.180000       12.0110           0   0.00000     -0.301140E-02
    3750 1S   253  PRO  HB1     3   0.900000E-01   1.00800           0   0.00000     -0.301140E-02
    3751 1S   253  PRO  HB2     3   0.900000E-01   1.00800           0   0.00000     -0.301140E-02
    3752 1S   253  PRO  CG     30  -0.180000       12.0110           0   0.00000     -0.301140E-02
    3753 1S   253  PRO  HG1     3   0.900000E-01   1.00800           0   0.00000     -0.301140E-02
    3754 1S   253  PRO  HG2     3   0.900000E-01   1.00800           0   0.00000     -0.301140E-02
    3755 1S   253  PRO  C      20   0.510000       12.0110           0   0.00000     -0.301140E-02
    3756 1S   253  PRO  O      70  -0.510000       15.9990           0   0.00000     -0.301140E-02
    3757 1S   254  SER  N      54  -0.470000       14.0070           0   0.00000     -0.301140E-02
    3758 1S   254  SER  HN      1   0.310000       1.00800           0   0.00000     -0.301140E-02
    3759 1S   254  SER  CA     22   0.700000E-01   12.0110           0   0.00000     -0.301140E-02
    3760 1S   254  SER  HA      6   0.900000E-01   1.00800           0   0.00000     -0.301140E-02
    3761 1S   254  SER  CB     23   0.500000E-01   12.0110           0   0.00000     -0.301140E-02
    3762 1S   254  SER  HB1     3   0.900000E-01   1.00800           0   0.00000     -0.301140E-02
    3763 1S   254  SER  HB2     3   0.900000E-01   1.00800           0   0.00000     -0.301140E-02
    3764 1S   254  SER  OG     73  -0.660000       15.9990           0   0.00000     -0.301140E-02
    3765 1S   254  SER  HG1     1   0.430000       1.00800           0   0.00000     -0.301140E-02
    3766 1S   254  SER  C      20   0.510000       12.0110           0   0.00000     -0.301140E-02
    3767 1S   254  SER  O      70  -0.510000       15.9990           0   0.00000     -0.301140E-02
    3768 1S   255  TYR  N      54  -0.470000       14.0070           0   0.00000     -0.301140E-02
    3769 1S   255  TYR  HN      1   0.310000       1.00800           0   0.00000     -0.301140E-02
    3770 1S   255  TYR  CA     22   0.700000E-01   12.0110           0   0.00000     -0.301140E-02
    3771 1S   255  TYR  HA      6   0.900000E-01   1.00800           0   0.00000     -0.301140E-02
    3772 1S   255  TYR  CB     23  -0.180000       12.0110           0   0.00000     -0.301140E-02
    3773 1S   255  TYR  HB1     3   0.900000E-01   1.00800           0   0.00000     -0.301140E-02
    3774 1S   255  TYR  HB2     3   0.900000E-01   1.00800           0   0.00000     -0.301140E-02
    3775 1S   255  TYR  CG     21    0.00000       12.0110           0   0.00000     -0.301140E-02
    3776 1S   255  TYR  CD1    21  -0.115000       12.0110           0   0.00000     -0.301140E-02
    3777 1S   255  TYR  HD1     5   0.115000       1.00800           0   0.00000     -0.301140E-02
    3778 1S   255  TYR  CE1    21  -0.115000       12.0110           0   0.00000     -0.301140E-02
    3779 1S   255  TYR  HE1     5   0.115000       1.00800           0   0.00000     -0.301140E-02
    3780 1S   255  TYR  CZ     21   0.110000       12.0110           0   0.00000     -0.301140E-02
    3781 1S   255  TYR  OH     73  -0.540000       15.9990           0   0.00000     -0.301140E-02
    3782 1S   255  TYR  HH      1   0.430000       1.00800           0   0.00000     -0.301140E-02
    3783 1S   255  TYR  CD2    21  -0.115000       12.0110           0   0.00000     -0.301140E-02
    3784 1S   255  TYR  HD2     5   0.115000       1.00800           0   0.00000     -0.301140E-02
    3785 1S   255  TYR  CE2    21  -0.115000       12.0110           0   0.00000     -0.301140E-02
    3786 1S   255  TYR  HE2     5   0.115000       1.00800           0   0.00000     -0.301140E-02
    3787 1S   255  TYR  C      20   0.510000       12.0110           0   0.00000     -0.301140E-02
    3788 1S   255  TYR  O      70  -0.510000       15.9990           0   0.00000     -0.301140E-02
    3789 1S   256  ILE  N      54  -0.470000       14.0070           0   0.00000     -0.301140E-02
    3790 1S   256  ILE  HN      1   0.310000       1.00800           0   0.00000     -0.301140E-02
    3791 1S   256  ILE  CA     22   0.700000E-01   12.0110           0   0.00000     -0.301140E-02
    3792 1S   256  ILE  HA      6   0.900000E-01   1.00800           0   0.00000     -0.301140E-02
    3793 1S   256  ILE  CB     22  -0.900000E-01   12.0110           0   0.00000     -0.301140E-02
    3794 1S   256  ILE  HB      3   0.900000E-01   1.00800           0   0.00000     -0.301140E-02
    3795 1S   256  ILE  CG2    24  -0.270000       12.0110           0   0.00000     -0.301140E-02
    3796 1S   256  ILE  HG21    3   0.900000E-01   1.00800           0   0.00000     -0.301140E-02
    3797 1S   256  ILE  HG22    3   0.900000E-01   1.00800           0   0.00000     -0.301140E-02
    3798 1S   256  ILE  HG23    3   0.900000E-01   1.00800           0   0.00000     -0.301140E-02
    3799 1S   256  ILE  CG1    23  -0.180000       12.0110           0   0.00000     -0.301140E-02
    3800 1S   256  ILE  HG11    3   0.900000E-01   1.00800           0   0.00000     -0.301140E-02
    3801 1S   256  ILE  HG12    3   0.900000E-01   1.00800           0   0.00000     -0.301140E-02
    3802 1S   256  ILE  CD     24  -0.270000       12.0110           0   0.00000     -0.301140E-02
    3803 1S   256  ILE  HD1     3   0.900000E-01   1.00800           0   0.00000     -0.301140E-02
    3804 1S   256  ILE  HD2     3   0.900000E-01   1.00800           0   0.00000     -0.301140E-02
    3805 1S   256  ILE  HD3     3   0.900000E-01   1.00800           0   0.00000     -0.301140E-02
    3806 1S   256  ILE  C      20   0.510000       12.0110           0   0.00000     -0.301140E-02
    3807 1S   256  ILE  O      70  -0.510000       15.9990           0   0.00000     -0.301140E-02
    3808 1S   257  SER  N      54  -0.470000       14.0070           0   0.00000     -0.301140E-02
    3809 1S   257  SER  HN      1   0.310000       1.00800           0   0.00000     -0.301140E-02
    3810 1S   257  SER  CA     22   0.700000E-01   12.0110           0   0.00000     -0.301140E-02
    3811 1S   257  SER  HA      6   0.900000E-01   1.00800           0   0.00000     -0.301140E-02
    3812 1S   257  SER  CB     23   0.500000E-01   12.0110           0   0.00000     -0.301140E-02
    3813 1S   257  SER  HB1     3   0.900000E-01   1.00800           0   0.00000     -0.301140E-02
    3814 1S   257  SER  HB2     3   0.900000E-01   1.00800           0   0.00000     -0.301140E-02
    3815 1S   257  SER  OG     73  -0.660000       15.9990           0   0.00000     -0.301140E-02
    3816 1S   257  SER  HG1     1   0.430000       1.00800           0   0.00000     -0.301140E-02
    3817 1S   257  SER  C      20   0.510000       12.0110           0   0.00000     -0.301140E-02
    3818 1S   257  SER  O      70  -0.510000       15.9990           0   0.00000     -0.301140E-02
    3819 1S   258  PRO  N      50  -0.290000       14.0070           0   0.00000     -0.301140E-02
    3820 1S   258  PRO  CD     31    0.00000       12.0110           0   0.00000     -0.301140E-02
    3821 1S   258  PRO  HD1     3   0.900000E-01   1.00800           0   0.00000     -0.301140E-02
    3822 1S   258  PRO  HD2     3   0.900000E-01   1.00800           0   0.00000     -0.301140E-02
    3823 1S   258  PRO  CA     29   0.200000E-01   12.0110           0   0.00000     -0.301140E-02
    3824 1S   258  PRO  HA      6   0.900000E-01   1.00800           0   0.00000     -0.301140E-02
    3825 1S   258  PRO  CB     30  -0.180000       12.0110           0   0.00000     -0.301140E-02
    3826 1S   258  PRO  HB1     3   0.900000E-01   1.00800           0   0.00000     -0.301140E-02
    3827 1S   258  PRO  HB2     3   0.900000E-01   1.00800           0   0.00000     -0.301140E-02
    3828 1S   258  PRO  CG     30  -0.180000       12.0110           0   0.00000     -0.301140E-02
    3829 1S   258  PRO  HG1     3   0.900000E-01   1.00800           0   0.00000     -0.301140E-02
    3830 1S   258  PRO  HG2     3   0.900000E-01   1.00800           0   0.00000     -0.301140E-02
    3831 1S   258  PRO  C      20   0.510000       12.0110           0   0.00000     -0.301140E-02
    3832 1S   258  PRO  O      70  -0.510000       15.9990           0   0.00000     -0.301140E-02
    3833 1S   259  ILE  N      54  -0.470000       14.0070           0   0.00000     -0.301140E-02
    3834 1S   259  ILE  HN      1   0.310000       1.00800           0   0.00000     -0.301140E-02
    3835 1S   259  ILE  CA     22   0.700000E-01   12.0110           0   0.00000     -0.301140E-02
    3836 1S   259  ILE  HA      6   0.900000E-01   1.00800           0   0.00000     -0.301140E-02
    3837 1S   259  ILE  CB     22  -0.900000E-01   12.0110           0   0.00000     -0.301140E-02
    3838 1S   259  ILE  HB      3   0.900000E-01   1.00800           0   0.00000     -0.301140E-02
    3839 1S   259  ILE  CG2    24  -0.270000       12.0110           0   0.00000     -0.301140E-02
    3840 1S   259  ILE  HG21    3   0.900000E-01   1.00800           0   0.00000     -0.301140E-02
    3841 1S   259  ILE  HG22    3   0.900000E-01   1.00800           0   0.00000     -0.301140E-02
    3842 1S   259  ILE  HG23    3   0.900000E-01   1.00800           0   0.00000     -0.301140E-02
    3843 1S   259  ILE  CG1    23  -0.180000       12.0110           0   0.00000     -0.301140E-02
    3844 1S   259  ILE  HG11    3   0.900000E-01   1.00800           0   0.00000     -0.301140E-02
    3845 1S   259  ILE  HG12    3   0.900000E-01   1.00800           0   0.00000     -0.301140E-02
    3846 1S   259  ILE  CD     24  -0.270000       12.0110           0   0.00000     -0.301140E-02
    3847 1S   259  ILE  HD1     3   0.900000E-01   1.00800           0   0.00000     -0.301140E-02
    3848 1S   259  ILE  HD2     3   0.900000E-01   1.00800           0   0.00000     -0.301140E-02
    3849 1S   259  ILE  HD3     3   0.900000E-01   1.00800           0   0.00000     -0.301140E-02
    3850 1S   259  ILE  C      20   0.510000       12.0110           0   0.00000     -0.301140E-02
    3851 1S   259  ILE  O      70  -0.510000       15.9990           0   0.00000     -0.301140E-02
    3852 1S   260  GLY  N      54  -0.470000       14.0070           0   0.00000     -0.301140E-02
    3853 1S   260  GLY  HN      1   0.310000       1.00800           0   0.00000     -0.301140E-02
    3854 1S   260  GLY  CA     23  -0.200000E-01   12.0110           0   0.00000     -0.301140E-02
    3855 1S   260  GLY  HA1     6   0.900000E-01   1.00800           0   0.00000     -0.301140E-02
    3856 1S   260  GLY  HA2     6   0.900000E-01   1.00800           0   0.00000     -0.301140E-02
    3857 1S   260  GLY  C      20   0.510000       12.0110           0   0.00000     -0.301140E-02
    3858 1S   260  GLY  O      70  -0.510000       15.9990           0   0.00000     -0.301140E-02
    3859 1S   261  CYS  N      54  -0.470000       14.0070           0   0.00000     -0.301140E-02
    3860 1S   261  CYS  HN      1   0.310000       1.00800           0   0.00000     -0.301140E-02
    3861 1S   261  CYS  CA     22   0.700000E-01   12.0110           0   0.00000     -0.301140E-02
    3862 1S   261  CYS  HA      6   0.900000E-01   1.00800           0   0.00000     -0.301140E-02
    3863 1S   261  CYS  CB     23  -0.110000       12.0110           0   0.00000     -0.301140E-02
    3864 1S   261  CYS  HB1     3   0.900000E-01   1.00800           0   0.00000     -0.301140E-02
    3865 1S   261  CYS  HB2     3   0.900000E-01   1.00800           0   0.00000     -0.301140E-02
    3866 1S   261  CYS  SG     81  -0.230000       32.0600           0   0.00000     -0.301140E-02
    3867 1S   261  CYS  HG1    10   0.160000       1.00800           0   0.00000     -0.301140E-02
    3868 1S   261  CYS  C      20   0.510000       12.0110           0   0.00000     -0.301140E-02
    3869 1S   261  CYS  O      70  -0.510000       15.9990           0   0.00000     -0.301140E-02
    3870 1S   262  LEU  N      54  -0.470000       14.0070           0   0.00000     -0.301140E-02
    3871 1S   262  LEU  HN      1   0.310000       1.00800           0   0.00000     -0.301140E-02
    3872 1S   262  LEU  CA     22   0.700000E-01   12.0110           0   0.00000     -0.301140E-02
    3873 1S   262  LEU  HA      6   0.900000E-01   1.00800           0   0.00000     -0.301140E-02
    3874 1S   262  LEU  CB     23  -0.180000       12.0110           0   0.00000     -0.301140E-02
    3875 1S   262  LEU  HB1     3   0.900000E-01   1.00800           0   0.00000     -0.301140E-02
    3876 1S   262  LEU  HB2     3   0.900000E-01   1.00800           0   0.00000     -0.301140E-02
    3877 1S   262  LEU  CG     22  -0.900000E-01   12.0110           0   0.00000     -0.301140E-02
    3878 1S   262  LEU  HG      3   0.900000E-01   1.00800           0   0.00000     -0.301140E-02
    3879 1S   262  LEU  CD1    24  -0.270000       12.0110           0   0.00000     -0.301140E-02
    3880 1S   262  LEU  HD11    3   0.900000E-01   1.00800           0   0.00000     -0.301140E-02
    3881 1S   262  LEU  HD12    3   0.900000E-01   1.00800           0   0.00000     -0.301140E-02
    3882 1S   262  LEU  HD13    3   0.900000E-01   1.00800           0   0.00000     -0.301140E-02
    3883 1S   262  LEU  CD2    24  -0.270000       12.0110           0   0.00000     -0.301140E-02
    3884 1S   262  LEU  HD21    3   0.900000E-01   1.00800           0   0.00000     -0.301140E-02
    3885 1S   262  LEU  HD22    3   0.900000E-01   1.00800           0   0.00000     -0.301140E-02
    3886 1S   262  LEU  HD23    3   0.900000E-01   1.00800           0   0.00000     -0.301140E-02
    3887 1S   262  LEU  C      20   0.510000       12.0110           0   0.00000     -0.301140E-02
    3888 1S   262  LEU  O      70  -0.510000       15.9990           0   0.00000     -0.301140E-02
    3889 1S   263  PRO  N      50  -0.290000       14.0070           0   0.00000     -0.301140E-02
    3890 1S   263  PRO  CD     31    0.00000       12.0110           0   0.00000     -0.301140E-02
    3891 1S   263  PRO  HD1     3   0.900000E-01   1.00800           0   0.00000     -0.301140E-02
    3892 1S   263  PRO  HD2     3   0.900000E-01   1.00800           0   0.00000     -0.301140E-02
    3893 1S   263  PRO  CA     29   0.200000E-01   12.0110           0   0.00000     -0.301140E-02
    3894 1S   263  PRO  HA      6   0.900000E-01   1.00800           0   0.00000     -0.301140E-02
    3895 1S   263  PRO  CB     30  -0.180000       12.0110           0   0.00000     -0.301140E-02
    3896 1S   263  PRO  HB1     3   0.900000E-01   1.00800           0   0.00000     -0.301140E-02
    3897 1S   263  PRO  HB2     3   0.900000E-01   1.00800           0   0.00000     -0.301140E-02
    3898 1S   263  PRO  CG     30  -0.180000       12.0110           0   0.00000     -0.301140E-02
    3899 1S   263  PRO  HG1     3   0.900000E-01   1.00800           0   0.00000     -0.301140E-02
    3900 1S   263  PRO  HG2     3   0.900000E-01   1.00800           0   0.00000     -0.301140E-02
    3901 1S   263  PRO  C      20   0.510000       12.0110           0   0.00000     -0.301140E-02
    3902 1S   263  PRO  O      70  -0.510000       15.9990           0   0.00000     -0.301140E-02
    3903 1S   264  ALA  N      54  -0.470000       14.0070           0   0.00000     -0.301140E-02
    3904 1S   264  ALA  HN      1   0.310000       1.00800           0   0.00000     -0.301140E-02
    3905 1S   264  ALA  CA     22   0.700000E-01   12.0110           0   0.00000     -0.301140E-02
    3906 1S   264  ALA  HA      6   0.900000E-01   1.00800           0   0.00000     -0.301140E-02
    3907 1S   264  ALA  CB     24  -0.270000       12.0110           0   0.00000     -0.301140E-02
    3908 1S   264  ALA  HB1     3   0.900000E-01   1.00800           0   0.00000     -0.301140E-02
    3909 1S   264  ALA  HB2     3   0.900000E-01   1.00800           0   0.00000     -0.301140E-02
    3910 1S   264  ALA  HB3     3   0.900000E-01   1.00800           0   0.00000     -0.301140E-02
    3911 1S   264  ALA  C      20   0.510000       12.0110           0   0.00000     -0.301140E-02
    3912 1S   264  ALA  O      70  -0.510000       15.9990           0   0.00000     -0.301140E-02
    3913 1S   265  HSE  N      54  -0.470000       14.0070           0   0.00000     -0.301140E-02
    3914 1S   265  HSE  HN      1   0.310000       1.00800           0   0.00000     -0.301140E-02
    3915 1S   265  HSE  CA     22   0.700000E-01   12.0110           0   0.00000     -0.301140E-02
    3916 1S   265  HSE  HA      6   0.900000E-01   1.00800           0   0.00000     -0.301140E-02
    3917 1S   265  HSE  CB     23  -0.800000E-01   12.0110           0   0.00000     -0.301140E-02
    3918 1S   265  HSE  HB1     3   0.900000E-01   1.00800           0   0.00000     -0.301140E-02
    3919 1S   265  HSE  HB2     3   0.900000E-01   1.00800           0   0.00000     -0.301140E-02
    3920 1S   265  HSE  ND1    52  -0.700000       14.0070           0   0.00000     -0.301140E-02
    3921 1S   265  HSE  CG     25   0.220000       12.0110           0   0.00000     -0.301140E-02
    3922 1S   265  HSE  CE1    26   0.250000       12.0110           0   0.00000     -0.301140E-02
    3923 1S   265  HSE  HE1     7   0.130000       1.00800           0   0.00000     -0.301140E-02
    3924 1S   265  HSE  NE2    51  -0.360000       14.0070           0   0.00000     -0.301140E-02
    3925 1S   265  HSE  HE2     1   0.320000       1.00800           0   0.00000     -0.301140E-02
    3926 1S   265  HSE  CD2    25  -0.500000E-01   12.0110           0   0.00000     -0.301140E-02
    3927 1S   265  HSE  HD2     9   0.900000E-01   1.00800           0   0.00000     -0.301140E-02
    3928 1S   265  HSE  C      20   0.510000       12.0110           0   0.00000     -0.301140E-02
    3929 1S   265  HSE  O      70  -0.510000       15.9990           0   0.00000     -0.301140E-02
    3930 1S   266  LEU  N      54  -0.470000       14.0070           0   0.00000     -0.301140E-02
    3931 1S   266  LEU  HN      1   0.310000       1.00800           0   0.00000     -0.301140E-02
    3932 1S   266  LEU  CA     22   0.700000E-01   12.0110           0   0.00000     -0.301140E-02
    3933 1S   266  LEU  HA      6   0.900000E-01   1.00800           0   0.00000     -0.301140E-02
    3934 1S   266  LEU  CB     23  -0.180000       12.0110           0   0.00000     -0.301140E-02
    3935 1S   266  LEU  HB1     3   0.900000E-01   1.00800           0   0.00000     -0.301140E-02
    3936 1S   266  LEU  HB2     3   0.900000E-01   1.00800           0   0.00000     -0.301140E-02
    3937 1S   266  LEU  CG     22  -0.900000E-01   12.0110           0   0.00000     -0.301140E-02
    3938 1S   266  LEU  HG      3   0.900000E-01   1.00800           0   0.00000     -0.301140E-02
    3939 1S   266  LEU  CD1    24  -0.270000       12.0110           0   0.00000     -0.301140E-02
    3940 1S   266  LEU  HD11    3   0.900000E-01   1.00800           0   0.00000     -0.301140E-02
    3941 1S   266  LEU  HD12    3   0.900000E-01   1.00800           0   0.00000     -0.301140E-02
    3942 1S   266  LEU  HD13    3   0.900000E-01   1.00800           0   0.00000     -0.301140E-02
    3943 1S   266  LEU  CD2    24  -0.270000       12.0110           0   0.00000     -0.301140E-02
    3944 1S   266  LEU  HD21    3   0.900000E-01   1.00800           0   0.00000     -0.301140E-02
    3945 1S   266  LEU  HD22    3   0.900000E-01   1.00800           0   0.00000     -0.301140E-02
    3946 1S   266  LEU  HD23    3   0.900000E-01   1.00800           0   0.00000     -0.301140E-02
    3947 1S   266  LEU  C      20   0.510000       12.0110           0   0.00000     -0.301140E-02
    3948 1S   266  LEU  O      70  -0.510000       15.9990           0   0.00000     -0.301140E-02
    3949 1S   267  LEU  N      54  -0.470000       14.0070           0   0.00000     -0.301140E-02
    3950 1S   267  LEU  HN      1   0.310000       1.00800           0   0.00000     -0.301140E-02
    3951 1S   267  LEU  CA     22   0.700000E-01   12.0110           0   0.00000     -0.301140E-02
    3952 1S   267  LEU  HA      6   0.900000E-01   1.00800           0   0.00000     -0.301140E-02
    3953 1S   267  LEU  CB     23  -0.180000       12.0110           0   0.00000     -0.301140E-02
    3954 1S   267  LEU  HB1     3   0.900000E-01   1.00800           0   0.00000     -0.301140E-02
    3955 1S   267  LEU  HB2     3   0.900000E-01   1.00800           0   0.00000     -0.301140E-02
    3956 1S   267  LEU  CG     22  -0.900000E-01   12.0110           0   0.00000     -0.301140E-02
    3957 1S   267  LEU  HG      3   0.900000E-01   1.00800           0   0.00000     -0.301140E-02
    3958 1S   267  LEU  CD1    24  -0.270000       12.0110           0   0.00000     -0.301140E-02
    3959 1S   267  LEU  HD11    3   0.900000E-01   1.00800           0   0.00000     -0.301140E-02
    3960 1S   267  LEU  HD12    3   0.900000E-01   1.00800           0   0.00000     -0.301140E-02
    3961 1S   267  LEU  HD13    3   0.900000E-01   1.00800           0   0.00000     -0.301140E-02
    3962 1S   267  LEU  CD2    24  -0.270000       12.0110           0   0.00000     -0.301140E-02
    3963 1S   267  LEU  HD21    3   0.900000E-01   1.00800           0   0.00000     -0.301140E-02
    3964 1S   267  LEU  HD22    3   0.900000E-01   1.00800           0   0.00000     -0.301140E-02
    3965 1S   267  LEU  HD23    3   0.900000E-01   1.00800           0   0.00000     -0.301140E-02
    3966 1S   267  LEU  C      20   0.510000       12.0110           0   0.00000     -0.301140E-02
    3967 1S   267  LEU  O      70  -0.510000       15.9990           0   0.00000     -0.301140E-02
    3968 1S   268  GLY  N      54  -0.470000       14.0070           0   0.00000     -0.301140E-02
    3969 1S   268  GLY  HN      1   0.310000       1.00800           0   0.00000     -0.301140E-02
    3970 1S   268  GLY  CA     23  -0.200000E-01   12.0110           0   0.00000     -0.301140E-02
    3971 1S   268  GLY  HA1     6   0.900000E-01   1.00800           0   0.00000     -0.301140E-02
    3972 1S   268  GLY  HA2     6   0.900000E-01   1.00800           0   0.00000     -0.301140E-02
    3973 1S   268  GLY  C      20   0.510000       12.0110           0   0.00000     -0.301140E-02
    3974 1S   268  GLY  O      70  -0.510000       15.9990           0   0.00000     -0.301140E-02
    3975 1S   269  ASP  N      54  -0.470000       14.0070           0   0.00000     -0.301140E-02
    3976 1S   269  ASP  HN      1   0.310000       1.00800           0   0.00000     -0.301140E-02
    3977 1S   269  ASP  CA     22   0.700000E-01   12.0110           0   0.00000     -0.301140E-02
    3978 1S   269  ASP  HA      6   0.900000E-01   1.00800           0   0.00000     -0.301140E-02
    3979 1S   269  ASP  CB     23  -0.280000       12.0110           0   0.00000     -0.301140E-02
    3980 1S   269  ASP  HB1     3   0.900000E-01   1.00800           0   0.00000     -0.301140E-02
    3981 1S   269  ASP  HB2     3   0.900000E-01   1.00800           0   0.00000     -0.301140E-02
    3982 1S   269  ASP  CG     32   0.620000       12.0110           0   0.00000     -0.301140E-02
    3983 1S   269  ASP  OD1    72  -0.760000       15.9990           0   0.00000     -0.301140E-02
    3984 1S   269  ASP  OD2    72  -0.760000       15.9990           0   0.00000     -0.301140E-02
    3985 1S   269  ASP  C      20   0.510000       12.0110           0   0.00000     -0.301140E-02
    3986 1S   269  ASP  O      70  -0.510000       15.9990           0   0.00000     -0.301140E-02
    3987 1S   270  MET  N      54  -0.470000       14.0070           0   0.00000     -0.301140E-02
    3988 1S   270  MET  HN      1   0.310000       1.00800           0   0.00000     -0.301140E-02
    3989 1S   270  MET  CA     22   0.700000E-01   12.0110           0   0.00000     -0.301140E-02
    3990 1S   270  MET  HA      6   0.900000E-01   1.00800           0   0.00000     -0.301140E-02
    3991 1S   270  MET  CB     23  -0.180000       12.0110           0   0.00000     -0.301140E-02
    3992 1S   270  MET  HB1     3   0.900000E-01   1.00800           0   0.00000     -0.301140E-02
    3993 1S   270  MET  HB2     3   0.900000E-01   1.00800           0   0.00000     -0.301140E-02
    3994 1S   270  MET  CG     23  -0.140000       12.0110           0   0.00000     -0.301140E-02
    3995 1S   270  MET  HG1     3   0.900000E-01   1.00800           0   0.00000     -0.301140E-02
    3996 1S   270  MET  HG2     3   0.900000E-01   1.00800           0   0.00000     -0.301140E-02
    3997 1S   270  MET  SD     81  -0.900000E-01   32.0600           0   0.00000     -0.301140E-02
    3998 1S   270  MET  CE     24  -0.220000       12.0110           0   0.00000     -0.301140E-02
    3999 1S   270  MET  HE1     3   0.900000E-01   1.00800           0   0.00000     -0.301140E-02
    4000 1S   270  MET  HE2     3   0.900000E-01   1.00800           0   0.00000     -0.301140E-02
    4001 1S   270  MET  HE3     3   0.900000E-01   1.00800           0   0.00000     -0.301140E-02
    4002 1S   270  MET  C      20   0.510000       12.0110           0   0.00000     -0.301140E-02
    4003 1S   270  MET  O      70  -0.510000       15.9990           0   0.00000     -0.301140E-02
    4004 1S   271  TRP  N      54  -0.470000       14.0070           0   0.00000     -0.301140E-02
    4005 1S   271  TRP  HN      1   0.310000       1.00800           0   0.00000     -0.301140E-02
    4006 1S   271  TRP  CA     22   0.700000E-01   12.0110           0   0.00000     -0.301140E-02
    4007 1S   271  TRP  HA      6   0.900000E-01   1.00800           0   0.00000     -0.301140E-02
    4008 1S   271  TRP  CB     23  -0.180000       12.0110           0   0.00000     -0.301140E-02
    4009 1S   271  TRP  HB1     3   0.900000E-01   1.00800           0   0.00000     -0.301140E-02
    4010 1S   271  TRP  HB2     3   0.900000E-01   1.00800           0   0.00000     -0.301140E-02
    4011 1S   271  TRP  CG     28  -0.300000E-01   12.0110           0   0.00000     -0.301140E-02
    4012 1S   271  TRP  CD1    21   0.350000E-01   12.0110           0   0.00000     -0.301140E-02
    4013 1S   271  TRP  HD1     5   0.115000       1.00800           0   0.00000     -0.301140E-02
    4014 1S   271  TRP  NE1    58  -0.610000       14.0070           0   0.00000     -0.301140E-02
    4015 1S   271  TRP  HE1     1   0.380000       1.00800           0   0.00000     -0.301140E-02
    4016 1S   271  TRP  CE2    27   0.130000       12.0110           0   0.00000     -0.301140E-02
    4017 1S   271  TRP  CD2    27  -0.200000E-01   12.0110           0   0.00000     -0.301140E-02
    4018 1S   271  TRP  CE3    21  -0.115000       12.0110           0   0.00000     -0.301140E-02
    4019 1S   271  TRP  HE3     5   0.115000       1.00800           0   0.00000     -0.301140E-02
    4020 1S   271  TRP  CZ3    21  -0.115000       12.0110           0   0.00000     -0.301140E-02
    4021 1S   271  TRP  HZ3     5   0.115000       1.00800           0   0.00000     -0.301140E-02
    4022 1S   271  TRP  CZ2    21  -0.115000       12.0110           0   0.00000     -0.301140E-02
    4023 1S   271  TRP  HZ2     5   0.115000       1.00800           0   0.00000     -0.301140E-02
    4024 1S   271  TRP  CH2    21  -0.115000       12.0110           0   0.00000     -0.301140E-02
    4025 1S   271  TRP  HH2     5   0.115000       1.00800           0   0.00000     -0.301140E-02
    4026 1S   271  TRP  C      20   0.510000       12.0110           0   0.00000     -0.301140E-02
    4027 1S   271  TRP  O      70  -0.510000       15.9990           0   0.00000     -0.301140E-02
    4028 1S   272  GLY  N      54  -0.470000       14.0070           0   0.00000     -0.301140E-02
    4029 1S   272  GLY  HN      1   0.310000       1.00800           0   0.00000     -0.301140E-02
    4030 1S   272  GLY  CA     23  -0.200000E-01   12.0110           0   0.00000     -0.301140E-02
    4031 1S   272  GLY  HA1     6   0.900000E-01   1.00800           0   0.00000     -0.301140E-02
    4032 1S   272  GLY  HA2     6   0.900000E-01   1.00800           0   0.00000     -0.301140E-02
    4033 1S   272  GLY  C      20   0.510000       12.0110           0   0.00000     -0.301140E-02
    4034 1S   272  GLY  O      70  -0.510000       15.9990           0   0.00000     -0.301140E-02
    4035 1S   273  ARG  N      54  -0.470000       14.0070           0   0.00000     -0.301140E-02
    4036 1S   273  ARG  HN      1   0.310000       1.00800           0   0.00000     -0.301140E-02
    4037 1S   273  ARG  CA     22   0.700000E-01   12.0110           0   0.00000     -0.301140E-02
    4038 1S   273  ARG  HA      6   0.900000E-01   1.00800           0   0.00000     -0.301140E-02
[truncated: 2,275,734 more chars]
