# Supplementary material for: Genetic Uniformity of a Specific Region in SARS-CoV-2 Genome and In-Silico Target-Oriented Repurposing of N-Acetyl-D-Glucosamine
Source: Preprints.org preprint supplement (doi:10.20944/preprints202005.0397.v1), 2020-05-24
Supplement: Supplementary file 7 [file supplementary › S6 File/eadock3.err]

sib.fastconf.EADock3: running @ selenium/127.0.1.1 development version. /home/swissdock/swissdock/tmp//cache/eadock3/eadock3.jar MD5: 6b55cadf59de6f950f604b9d6d6562d2
sib.fastconf.EADock3: 5000 binding modes will be generated
sib.fastconf.EADock3: the 5000 with the most favorable SimpleFitness will be evaluated with FACTS.
sib.fastconf.EADock3: 250 binding modes will be retained
sib.fastconf.EADock3: minimize with 100 steps of SD then 250 steps of ABNR
sib.fastconf.EADock3: side chains closer than 0.0 A to any atom of the ligand will be optimized.
sib.fastconf.EADock3: Clustering radius is 2.0
sib.fastconf.EADock3: Maximum cluster size is 8
sib.fastconf.EADock3: clusters will have the exact size.
sib.fastconf.EADock3: Output file is clusters.zip
sib.fastconf.EADock3: Ligand selection is SEGID LIG
sib.fastconf.EADock3: temporary files will be kept.
sib.fastconf.EADock3: Translations allowed.
sib.fastconf.EADock3: solvation model is FACTS
sib.fastconf.EADock3: Centering rotations on the whole ligand.
sib.fastconf.EADock3: System  : 9550 atoms
sib.fastconf.EADock3: Ligand  : 30 atoms
sib.fastconf.EADock3: Receptor: 9520 atoms
sib.fastconf.EADock3:   Fixed part   : 9520 atoms
sib.fastconf.EADock3:   Flexible part: 0 atoms
sib.fastconf.EADock3: Blind docking
sib.fastconf.biodatastructures.molecules.FlexibleMoleculeBuilder: No RotateBond directive found.
sib.fastconf.biodatastructures.molecules.FlexibleMoleculeBuilder: Multiple keyword found in RotateBond directive.
sib.fastconf.biodatastructures.molecules.FlexibleMoleculeBuilder: Identify bonds.
sib.fastconf.biodatastructures.molecules.FlexibleMolecule: Total of 29 bonds found.
sib.fastconf.biodatastructures.molecules.FlexibleMolecule: Restricting dihedral rotations based on the number of atom on each side.
sib.fastconf.biodatastructures.molecules.FlexibleMolecule: 12 rotatable dihedral angles found.
sib.fastconf.biodatastructures.molecules.FlexibleMolecule: no user specified bond list.
sib.fastconf.biodatastructures.molecules.FlexibleMolecule: Filtering out dihedrals defined with an hydrogen.
sib.fastconf.biodatastructures.molecules.FlexibleMolecule: accepting bond 9525_9524_9522_9521
sib.fastconf.biodatastructures.molecules.FlexibleMolecule: accepting bond 9526_9525_9524_9522
sib.fastconf.biodatastructures.molecules.FlexibleMolecule: accepting bond 9524_9525_9526_9527
sib.fastconf.biodatastructures.molecules.FlexibleMolecule: accepting bond 9529_9528_9525_9524
sib.fastconf.biodatastructures.molecules.FlexibleMolecule: accepting bond 9525_9528_9529_9530
sib.fastconf.biodatastructures.molecules.FlexibleMolecule: accepting bond 9528_9529_9530_9531
sib.fastconf.biodatastructures.molecules.FlexibleMolecule: accepting bond 9529_9530_9531_9532
sib.fastconf.biodatastructures.molecules.FlexibleMolecule: found # 6 core atoms : [ 9525 9528 9529 9535 9542 9550 ]
sib.fastconf.biodatastructures.molecules.FlexibleMolecule: found rotatable bond # 0 between 9524 9522
sib.fastconf.biodatastructures.molecules.FlexibleMolecule: Group FIX (23): [ 9525 9539 9526 9528 9540 9527 9541 9529 9535 9542 9530 9534 9543 9531 9533 9544 9532 9545 9546 9547 9548 9549 9550 ] 
sib.fastconf.biodatastructures.molecules.FlexibleMolecule: Group ROTATABLE (5): [ 9521 9536 9537 9538 9523 ] 
sib.fastconf.biodatastructures.molecules.FlexibleMolecule: Group ROTATABLE (Validation) (2): [ 9521 9523 ] 
sib.fastconf.biodatastructures.molecules.FlexibleMolecule: Group ROTATABLE (Non Validation) (0): [ ] 
sib.fastconf.biodatastructures.molecules.FlexibleMolecule: found rotatable bond # 1 between 9525 9524
sib.fastconf.biodatastructures.molecules.FlexibleMolecule: Group FIX (21): [ 9526 9528 9540 9527 9541 9529 9535 9542 9530 9534 9543 9531 9533 9544 9532 9545 9546 9547 9548 9549 9550 ] 
sib.fastconf.biodatastructures.molecules.FlexibleMolecule: Group ROTATABLE (7): [ 9521 9522 9536 9537 9538 9523 9539 ] 
sib.fastconf.biodatastructures.molecules.FlexibleMolecule: Group ROTATABLE (Validation) (1): [ 9522 ] 
sib.fastconf.biodatastructures.molecules.FlexibleMolecule: Group ROTATABLE (Non Validation) (5): [ 9521 9536 9537 9538 9523 ] 
sib.fastconf.biodatastructures.molecules.FlexibleMolecule: found rotatable bond # 2 between 9525 9526
sib.fastconf.biodatastructures.molecules.FlexibleMolecule: Group FIX (26): [ 9521 9522 9536 9537 9538 9523 9524 9539 9528 9540 9529 9535 9542 9530 9534 9543 9550 9531 9533 9544 9549 9532 9545 9546 9548 9547 ] 
sib.fastconf.biodatastructures.molecules.FlexibleMolecule: Group ROTATABLE (2): [ 9527 9541 ] 
sib.fastconf.biodatastructures.molecules.FlexibleMolecule: Group ROTATABLE (Validation) (1): [ 9527 ] 
sib.fastconf.biodatastructures.molecules.FlexibleMolecule: Group ROTATABLE (Non Validation) (0): [ ] 
sib.fastconf.biodatastructures.molecules.FlexibleMolecule: found rotatable bond # 3 between 9528 9525
sib.fastconf.biodatastructures.molecules.FlexibleMolecule: Group FIX (16): [ 9529 9535 9542 9530 9534 9543 9531 9533 9544 9532 9545 9546 9547 9548 9549 9550 ] 
sib.fastconf.biodatastructures.molecules.FlexibleMolecule: Group ROTATABLE (12): [ 9521 9522 9536 9537 9538 9523 9524 9539 9526 9540 9527 9541 ] 
sib.fastconf.biodatastructures.molecules.FlexibleMolecule: Group ROTATABLE (Validation) (2): [ 9524 9526 ] 
sib.fastconf.biodatastructures.molecules.FlexibleMolecule: Group ROTATABLE (Non Validation) (9): [ 9521 9522 9536 9537 9538 9523 9539 9527 9541 ] 
sib.fastconf.biodatastructures.molecules.FlexibleMolecule: found rotatable bond # 4 between 9528 9529
sib.fastconf.biodatastructures.molecules.FlexibleMolecule: Group FIX (16): [ 9521 9522 9536 9537 9538 9523 9524 9525 9539 9526 9540 9527 9541 9535 9542 9550 ] 
sib.fastconf.biodatastructures.molecules.FlexibleMolecule: Group ROTATABLE (12): [ 9530 9534 9543 9531 9533 9544 9532 9545 9546 9547 9548 9549 ] 
sib.fastconf.biodatastructures.molecules.FlexibleMolecule: Group ROTATABLE (Validation) (2): [ 9530 9534 ] 
sib.fastconf.biodatastructures.molecules.FlexibleMolecule: Group ROTATABLE (Non Validation) (8): [ 9531 9533 9544 9532 9545 9546 9547 9548 ] 
sib.fastconf.biodatastructures.molecules.FlexibleMolecule: found rotatable bond # 5 between 9529 9530
sib.fastconf.biodatastructures.molecules.FlexibleMolecule: Group FIX (20): [ 9521 9522 9536 9537 9538 9523 9524 9525 9539 9526 9528 9540 9527 9541 9535 9542 9534 9543 9550 9549 ] 
sib.fastconf.biodatastructures.molecules.FlexibleMolecule: Group ROTATABLE (8): [ 9531 9533 9544 9532 9545 9546 9547 9548 ] 
sib.fastconf.biodatastructures.molecules.FlexibleMolecule: Group ROTATABLE (Validation) (2): [ 9531 9533 ] 
sib.fastconf.biodatastructures.molecules.FlexibleMolecule: Group ROTATABLE (Non Validation) (4): [ 9532 9545 9546 9547 ] 
sib.fastconf.biodatastructures.molecules.FlexibleMolecule: found rotatable bond # 6 between 9530 9531
sib.fastconf.biodatastructures.molecules.FlexibleMolecule: Group FIX (24): [ 9521 9522 9536 9537 9538 9523 9524 9525 9539 9526 9528 9540 9527 9541 9529 9535 9542 9534 9543 9550 9533 9544 9549 9548 ] 
sib.fastconf.biodatastructures.molecules.FlexibleMolecule: Group ROTATABLE (4): [ 9532 9545 9546 9547 ] 
sib.fastconf.biodatastructures.molecules.FlexibleMolecule: Group ROTATABLE (Validation) (1): [ 9532 ] 
sib.fastconf.biodatastructures.molecules.FlexibleMolecule: Group ROTATABLE (Non Validation) (0): [ ] 
sib.fastconf.biodatastructures.molecules.FlexibleMolecule: Bond 9525 9526 has no parent, best bet is 9528 9525
sib.fastconf.biodatastructures.molecules.FlexibleMolecule: Bond 9528 9525 has no putative parent, best bet is root node
sib.fastconf.biodatastructures.molecules.FlexibleMolecule: Bond 9528 9529 has no putative parent, best bet is root node
sib.fastconf.biodatastructures.molecules.FlexibleMoleculeRotatable bond tree initialized 8 elements
sib.fastconf.biodatastructures.molecules.FlexibleMolecule: Detecting chiral carbons
sib.fastconf.biodatastructures.molecules.FlexibleMolecule: Atom 9525 C2   [ 1.158 -0.158 -0.681 ] is chiral
sib.fastconf.biodatastructures.molecules.FlexibleMolecule: Atom 9528 C4   [ -0.127 -0.268 0.161 ] is chiral
sib.fastconf.biodatastructures.molecules.FlexibleMolecule: Atom 9530 C6   [ -2.693 -0.458 0.084 ] is chiral
sib.fastconf.FastconfBuilder: Initialize non bonded list.
sib.fastconf.biodatastructures.scoring.moleculargrids.grids.InsideMolecularGrid: Calculating inside grid [455][503][516]
sib.fastconf.biodatastructures.scoring.moleculargrids.grids.InsideMolecularGrid: Inside grid calculated in 1540 ms
sib.fastconf.biodatastructures.scoring.moleculargrids.grids.InsideMolecularGrid: Smoothing inside grid.
sib.fastconf.biodatastructures.scoring.moleculargrids.grids.InsideMolecularGrid: Inside grid smoothed in 1270 ms
sib.fastconf.biodatastructures.scoring.EvaluatorBuilder: generation of the electrostatic grid took 20 ms.
sib.fastconf.FastconfBuilder: Initial energy: 154.53235
sib.fastconf.EADock3: EADock3 starting
sib.fastconf.EADock3: Box volume 681927.1 ?
sib.fastconf.EADock3: Xmin: -65.500 Xmax: 15.439 Xsize: 80.939
sib.fastconf.EADock3: Ymin: -26.618 Ymax: 63.801 Ysize: 90.419
sib.fastconf.EADock3: Zmin: -74.816 Zmax: 18.363 Zsize: 93.180
sib.fastconf.EADock3: Calculating pocket bias.
sib.fastconf.EADock3: 13 cavities identified.
sib.fastconf.EADock3: 30 magic points identified.
sib.fastconf.EADock3: 30 pocket points were identified in 3550 ms
sib.fastconf.EADock3: Calculating surface bias.
sib.fastconf.EADock3: 16393 surface points were identified in 8280 ms
sib.fastconf.EADock3: 0.0 % done
sib.fastconf.EADock3: 0.1 % done
sib.fastconf.EADock3: 0.2 % done
sib.fastconf.EADock3: 0.3 % done
sib.fastconf.EADock3: 0.4 % done
sib.fastconf.EADock3: 0.5 % done
sib.fastconf.EADock3: 0.6 % done
sib.fastconf.EADock3: 0.7 % done
sib.fastconf.EADock3: 0.8 % done
sib.fastconf.EADock3: 0.9 % done
sib.fastconf.EADock3: 1.0 % done
sib.fastconf.EADock3: 1.1 % done
sib.fastconf.EADock3: 1.2 % done
sib.fastconf.EADock3: 1.3 % done
sib.fastconf.EADock3: 1.4 % done
sib.fastconf.EADock3: 1.5 % done
sib.fastconf.EADock3: 1.6 % done
sib.fastconf.EADock3: 1.7 % done
sib.fastconf.EADock3: 1.8 % done
sib.fastconf.EADock3: 1.9 % done
sib.fastconf.EADock3: 2.0 % done
sib.fastconf.EADock3: 2.1 % done
sib.fastconf.EADock3: 2.2 % done
sib.fastconf.EADock3: 2.3 % done
sib.fastconf.EADock3: 2.4 % done
sib.fastconf.EADock3: 2.5 % done
sib.fastconf.EADock3: 2.6 % done
sib.fastconf.EADock3: 2.7 % done
sib.fastconf.EADock3: 2.8 % done
sib.fastconf.EADock3: 2.9 % done
sib.fastconf.EADock3: 3.0 % done
sib.fastconf.EADock3: 3.1 % done
sib.fastconf.EADock3: 3.2 % done
sib.fastconf.EADock3: 3.3 % done
sib.fastconf.EADock3: 3.4 % done
sib.fastconf.EADock3: 3.5 % done
sib.fastconf.EADock3: 3.6 % done
sib.fastconf.EADock3: 3.7 % done
sib.fastconf.EADock3: 3.8 % done
sib.fastconf.EADock3: 3.9 % done
sib.fastconf.EADock3: 4.0 % done
sib.fastconf.EADock3: 4.1 % done
sib.fastconf.EADock3: 4.2 % done
sib.fastconf.EADock3: 4.3 % done
sib.fastconf.EADock3: 4.4 % done
sib.fastconf.EADock3: 4.5 % done
sib.fastconf.EADock3: 4.6 % done
sib.fastconf.EADock3: 4.7 % done
sib.fastconf.EADock3: 4.8 % done
sib.fastconf.EADock3: 4.9 % done
sib.fastconf.EADock3: 5.0 % done
sib.fastconf.EADock3: 5.1 % done
sib.fastconf.EADock3: 5.2 % done
sib.fastconf.EADock3: 5.3 % done
sib.fastconf.EADock3: 5.4 % done
sib.fastconf.EADock3: 5.5 % done
sib.fastconf.EADock3: 5.6 % done
sib.fastconf.EADock3: 5.7 % done
sib.fastconf.EADock3: 5.8 % done
sib.fastconf.EADock3: 5.9 % done
sib.fastconf.EADock3: 6.0 % done
sib.fastconf.EADock3: 6.1 % done
sib.fastconf.EADock3: 6.2 % done
sib.fastconf.EADock3: 6.3 % done
sib.fastconf.EADock3: 6.4 % done
sib.fastconf.EADock3: 6.5 % done
sib.fastconf.EADock3: 6.6 % done
sib.fastconf.EADock3: 6.7 % done
sib.fastconf.EADock3: 6.8 % done
sib.fastconf.EADock3: 6.9 % done
sib.fastconf.EADock3: 7.0 % done
sib.fastconf.EADock3: 7.1 % done
sib.fastconf.EADock3: 7.2 % done
sib.fastconf.EADock3: 7.3 % done
sib.fastconf.EADock3: 7.4 % done
sib.fastconf.EADock3: 7.5 % done
sib.fastconf.EADock3: 7.6 % done
sib.fastconf.EADock3: 7.7 % done
sib.fastconf.EADock3: 7.8 % done
sib.fastconf.EADock3: 7.9 % done
sib.fastconf.EADock3: 8.0 % done
sib.fastconf.EADock3: 8.1 % done
sib.fastconf.EADock3: 8.2 % done
sib.fastconf.EADock3: 8.3 % done
sib.fastconf.EADock3: 8.4 % done
sib.fastconf.EADock3: 8.5 % done
sib.fastconf.EADock3: 8.6 % done
sib.fastconf.EADock3: 8.7 % done
sib.fastconf.EADock3: 8.8 % done
sib.fastconf.EADock3: 8.9 % done
sib.fastconf.EADock3: 9.0 % done
sib.fastconf.EADock3: 9.1 % done
sib.fastconf.EADock3: 9.2 % done
sib.fastconf.EADock3: 9.3 % done
sib.fastconf.EADock3: 9.4 % done
sib.fastconf.EADock3: 9.5 % done
sib.fastconf.EADock3: 9.6 % done
sib.fastconf.EADock3: 9.7 % done
sib.fastconf.EADock3: 9.8 % done
sib.fastconf.EADock3: 9.9 % done
sib.fastconf.EADock3: 10.0 % done
sib.fastconf.EADock3: 10.1 % done
sib.fastconf.EADock3: 10.2 % done
sib.fastconf.EADock3: 10.3 % done
sib.fastconf.EADock3: 10.4 % done
sib.fastconf.EADock3: 10.5 % done
sib.fastconf.EADock3: 10.6 % done
sib.fastconf.EADock3: 10.7 % done
sib.fastconf.EADock3: 10.8 % done
sib.fastconf.EADock3: 10.9 % done
sib.fastconf.EADock3: 11.0 % done
sib.fastconf.EADock3: 11.1 % done
sib.fastconf.EADock3: 11.2 % done
sib.fastconf.EADock3: 11.3 % done
sib.fastconf.EADock3: 11.4 % done
sib.fastconf.EADock3: 11.5 % done
sib.fastconf.EADock3: 11.6 % done
sib.fastconf.EADock3: 11.7 % done
sib.fastconf.EADock3: 11.8 % done
sib.fastconf.EADock3: 11.9 % done
sib.fastconf.EADock3: 12.0 % done
sib.fastconf.EADock3: 12.1 % done
sib.fastconf.EADock3: 12.2 % done
sib.fastconf.EADock3: 12.3 % done
sib.fastconf.EADock3: 12.4 % done
sib.fastconf.EADock3: 12.5 % done
sib.fastconf.EADock3: 12.6 % done
sib.fastconf.EADock3: 12.7 % done
sib.fastconf.EADock3: 12.8 % done
sib.fastconf.EADock3: 12.9 % done
sib.fastconf.EADock3: 13.0 % done
sib.fastconf.EADock3: 13.1 % done
sib.fastconf.EADock3: 13.2 % done
sib.fastconf.EADock3: 13.3 % done
sib.fastconf.EADock3: 13.4 % done
sib.fastconf.EADock3: 13.5 % done
sib.fastconf.EADock3: 13.6 % done
sib.fastconf.EADock3: 13.7 % done
sib.fastconf.EADock3: 13.8 % done
sib.fastconf.EADock3: 13.9 % done
sib.fastconf.EADock3: 14.0 % done
sib.fastconf.EADock3: 14.1 % done
sib.fastconf.EADock3: 14.2 % done
sib.fastconf.EADock3: 14.3 % done
sib.fastconf.EADock3: 14.4 % done
sib.fastconf.EADock3: 14.5 % done
sib.fastconf.EADock3: 14.6 % done
sib.fastconf.EADock3: 14.7 % done
sib.fastconf.EADock3: 14.8 % done
sib.fastconf.EADock3: 14.9 % done
sib.fastconf.EADock3: 15.0 % done
sib.fastconf.EADock3: 15.1 % done
sib.fastconf.EADock3: 15.2 % done
sib.fastconf.EADock3: 15.3 % done
sib.fastconf.EADock3: 15.4 % done
sib.fastconf.EADock3: 15.5 % done
sib.fastconf.EADock3: 15.6 % done
sib.fastconf.EADock3: 15.7 % done
sib.fastconf.EADock3: 15.8 % done
sib.fastconf.EADock3: 15.9 % done
sib.fastconf.EADock3: 16.0 % done
sib.fastconf.EADock3: 16.1 % done
sib.fastconf.EADock3: 16.2 % done
sib.fastconf.EADock3: 16.3 % done
sib.fastconf.EADock3: 16.4 % done
sib.fastconf.EADock3: 16.5 % done
sib.fastconf.EADock3: 16.6 % done
sib.fastconf.EADock3: 16.7 % done
sib.fastconf.EADock3: 16.8 % done
sib.fastconf.EADock3: 16.9 % done
sib.fastconf.EADock3: 17.0 % done
sib.fastconf.EADock3: 17.1 % done
sib.fastconf.EADock3: 17.2 % done
sib.fastconf.EADock3: 17.3 % done
sib.fastconf.EADock3: 17.4 % done
sib.fastconf.EADock3: 17.5 % done
sib.fastconf.EADock3: 17.6 % done
sib.fastconf.EADock3: 17.7 % done
sib.fastconf.EADock3: 17.8 % done
sib.fastconf.EADock3: 17.9 % done
sib.fastconf.EADock3: 18.0 % done
sib.fastconf.EADock3: 18.1 % done
sib.fastconf.EADock3: 18.2 % done
sib.fastconf.EADock3: 18.3 % done
sib.fastconf.EADock3: 18.4 % done
sib.fastconf.EADock3: 18.5 % done
sib.fastconf.EADock3: 18.6 % done
sib.fastconf.EADock3: 18.7 % done
sib.fastconf.EADock3: 18.8 % done
sib.fastconf.EADock3: 18.9 % done
sib.fastconf.EADock3: 19.0 % done
sib.fastconf.EADock3: 19.1 % done
sib.fastconf.EADock3: 19.2 % done
sib.fastconf.EADock3: 19.3 % done
sib.fastconf.EADock3: 19.4 % done
sib.fastconf.EADock3: 19.5 % done
sib.fastconf.EADock3: 19.6 % done
sib.fastconf.EADock3: 19.7 % done
sib.fastconf.EADock3: 19.8 % done
sib.fastconf.EADock3: 19.9 % done
sib.fastconf.EADock3: 20.0 % done
sib.fastconf.EADock3: 20.1 % done
sib.fastconf.EADock3: 20.2 % done
sib.fastconf.EADock3: 20.3 % done
sib.fastconf.EADock3: 20.4 % done
sib.fastconf.EADock3: 20.5 % done
sib.fastconf.EADock3: 20.6 % done
sib.fastconf.EADock3: 20.7 % done
sib.fastconf.EADock3: 20.8 % done
sib.fastconf.EADock3: 20.9 % done
sib.fastconf.EADock3: 21.0 % done
sib.fastconf.EADock3: 21.1 % done
sib.fastconf.EADock3: 21.2 % done
sib.fastconf.EADock3: 21.3 % done
sib.fastconf.EADock3: 21.4 % done
sib.fastconf.EADock3: 21.5 % done
sib.fastconf.EADock3: 21.6 % done
sib.fastconf.EADock3: 21.7 % done
sib.fastconf.EADock3: 21.8 % done
sib.fastconf.EADock3: 21.9 % done
sib.fastconf.EADock3: 22.0 % done
sib.fastconf.EADock3: 22.1 % done
sib.fastconf.EADock3: 22.2 % done
sib.fastconf.EADock3: 22.3 % done
sib.fastconf.EADock3: 22.4 % done
sib.fastconf.EADock3: 22.5 % done
sib.fastconf.EADock3: 22.6 % done
sib.fastconf.EADock3: 22.7 % done
sib.fastconf.EADock3: 22.8 % done
sib.fastconf.EADock3: 22.9 % done
sib.fastconf.EADock3: 23.0 % done
sib.fastconf.EADock3: 23.1 % done
sib.fastconf.EADock3: 23.2 % done
sib.fastconf.EADock3: 23.3 % done
sib.fastconf.EADock3: 23.4 % done
sib.fastconf.EADock3: 23.5 % done
sib.fastconf.EADock3: 23.6 % done
sib.fastconf.EADock3: 23.7 % done
sib.fastconf.EADock3: 23.8 % done
sib.fastconf.EADock3: 23.9 % done
sib.fastconf.EADock3: 24.0 % done
sib.fastconf.EADock3: 24.1 % done
sib.fastconf.EADock3: 24.2 % done
sib.fastconf.EADock3: 24.3 % done
sib.fastconf.EADock3: 24.4 % done
sib.fastconf.EADock3: 24.5 % done
sib.fastconf.EADock3: 24.6 % done
sib.fastconf.EADock3: 24.7 % done
sib.fastconf.EADock3: 24.8 % done
sib.fastconf.EADock3: 24.9 % done
sib.fastconf.EADock3: 25.0 % done
sib.fastconf.EADock3: 25.1 % done
sib.fastconf.EADock3: 25.2 % done
sib.fastconf.EADock3: 25.3 % done
sib.fastconf.EADock3: 25.4 % done
sib.fastconf.EADock3: 25.5 % done
sib.fastconf.EADock3: 25.6 % done
sib.fastconf.EADock3: 25.7 % done
sib.fastconf.EADock3: 25.8 % done
sib.fastconf.EADock3: 25.9 % done
sib.fastconf.EADock3: 26.0 % done
sib.fastconf.EADock3: 26.1 % done
sib.fastconf.EADock3: 26.2 % done
sib.fastconf.EADock3: 26.3 % done
sib.fastconf.EADock3: 26.4 % done
sib.fastconf.EADock3: 26.5 % done
sib.fastconf.EADock3: 26.6 % done
sib.fastconf.EADock3: 26.7 % done
sib.fastconf.EADock3: 26.8 % done
sib.fastconf.EADock3: 26.9 % done
sib.fastconf.EADock3: 27.0 % done
sib.fastconf.EADock3: 27.1 % done
sib.fastconf.EADock3: 27.2 % done
sib.fastconf.EADock3: 27.3 % done
sib.fastconf.EADock3: 27.4 % done
sib.fastconf.EADock3: 27.5 % done
sib.fastconf.EADock3: 27.6 % done
sib.fastconf.EADock3: 27.7 % done
sib.fastconf.EADock3: 27.8 % done
sib.fastconf.EADock3: 27.9 % done
sib.fastconf.EADock3: 28.0 % done
sib.fastconf.EADock3: 28.1 % done
sib.fastconf.EADock3: 28.2 % done
sib.fastconf.EADock3: 28.3 % done
sib.fastconf.EADock3: 28.4 % done
sib.fastconf.EADock3: 28.5 % done
sib.fastconf.EADock3: 28.6 % done
sib.fastconf.EADock3: 28.7 % done
sib.fastconf.EADock3: 28.8 % done
sib.fastconf.EADock3: 28.9 % done
sib.fastconf.EADock3: 29.0 % done
sib.fastconf.EADock3: 29.1 % done
sib.fastconf.EADock3: 29.2 % done
sib.fastconf.EADock3: 29.3 % done
sib.fastconf.EADock3: 29.4 % done
sib.fastconf.EADock3: 29.5 % done
sib.fastconf.EADock3: 29.6 % done
sib.fastconf.EADock3: 29.7 % done
sib.fastconf.EADock3: 29.8 % done
sib.fastconf.EADock3: 29.9 % done
sib.fastconf.EADock3: 30.0 % done
sib.fastconf.EADock3: 30.1 % done
sib.fastconf.EADock3: 30.2 % done
sib.fastconf.EADock3: 30.3 % done
sib.fastconf.EADock3: 30.4 % done
sib.fastconf.EADock3: 30.5 % done
sib.fastconf.EADock3: 30.6 % done
sib.fastconf.EADock3: 30.7 % done
sib.fastconf.EADock3: 30.8 % done
sib.fastconf.EADock3: 30.9 % done
sib.fastconf.EADock3: 31.0 % done
sib.fastconf.EADock3: 31.1 % done
sib.fastconf.EADock3: 31.2 % done
sib.fastconf.EADock3: 31.3 % done
sib.fastconf.EADock3: 31.4 % done
sib.fastconf.EADock3: 31.5 % done
sib.fastconf.EADock3: 31.6 % done
sib.fastconf.EADock3: 31.7 % done
sib.fastconf.EADock3: 31.8 % done
sib.fastconf.EADock3: 31.9 % done
sib.fastconf.EADock3: 32.0 % done
sib.fastconf.EADock3: 32.1 % done
sib.fastconf.EADock3: 32.2 % done
sib.fastconf.EADock3: 32.3 % done
sib.fastconf.EADock3: 32.4 % done
sib.fastconf.EADock3: 32.5 % done
sib.fastconf.EADock3: 32.6 % done
sib.fastconf.EADock3: 32.7 % done
sib.fastconf.EADock3: 32.8 % done
sib.fastconf.EADock3: 32.9 % done
sib.fastconf.EADock3: 33.0 % done
sib.fastconf.EADock3: 33.1 % done
sib.fastconf.EADock3: 33.2 % done
sib.fastconf.EADock3: 33.3 % done
sib.fastconf.EADock3: 33.4 % done
sib.fastconf.EADock3: 33.5 % done
sib.fastconf.EADock3: 33.6 % done
sib.fastconf.EADock3: 33.7 % done
sib.fastconf.EADock3: 33.8 % done
sib.fastconf.EADock3: 33.9 % done
sib.fastconf.EADock3: 34.0 % done
sib.fastconf.EADock3: 34.1 % done
sib.fastconf.EADock3: 34.2 % done
sib.fastconf.EADock3: 34.3 % done
sib.fastconf.EADock3: 34.4 % done
sib.fastconf.EADock3: 34.5 % done
sib.fastconf.EADock3: 34.6 % done
sib.fastconf.EADock3: 34.7 % done
sib.fastconf.EADock3: 34.8 % done
sib.fastconf.EADock3: 34.9 % done
sib.fastconf.EADock3: 35.0 % done
sib.fastconf.EADock3: 35.1 % done
sib.fastconf.EADock3: 35.2 % done
sib.fastconf.EADock3: 35.3 % done
sib.fastconf.EADock3: 35.4 % done
sib.fastconf.EADock3: 35.5 % done
sib.fastconf.EADock3: 35.6 % done
sib.fastconf.EADock3: 35.7 % done
sib.fastconf.EADock3: 35.8 % done
sib.fastconf.EADock3: 35.9 % done
sib.fastconf.EADock3: 36.0 % done
sib.fastconf.EADock3: 36.1 % done
sib.fastconf.EADock3: 36.2 % done
sib.fastconf.EADock3: 36.3 % done
sib.fastconf.EADock3: 36.4 % done
sib.fastconf.EADock3: 36.5 % done
sib.fastconf.EADock3: 36.6 % done
sib.fastconf.EADock3: 36.7 % done
sib.fastconf.EADock3: 36.8 % done
sib.fastconf.EADock3: 36.9 % done
sib.fastconf.EADock3: 37.0 % done
sib.fastconf.EADock3: 37.1 % done
sib.fastconf.EADock3: 37.2 % done
sib.fastconf.EADock3: 37.3 % done
sib.fastconf.EADock3: 37.4 % done
sib.fastconf.EADock3: 37.5 % done
sib.fastconf.EADock3: 37.6 % done
sib.fastconf.EADock3: 37.7 % done
sib.fastconf.EADock3: 37.8 % done
sib.fastconf.EADock3: 37.9 % done
sib.fastconf.EADock3: 38.0 % done
sib.fastconf.EADock3: 38.1 % done
sib.fastconf.EADock3: 38.2 % done
sib.fastconf.EADock3: 38.3 % done
sib.fastconf.EADock3: 38.4 % done
sib.fastconf.EADock3: 38.5 % done
sib.fastconf.EADock3: 38.6 % done
sib.fastconf.EADock3: 38.7 % done
sib.fastconf.EADock3: 38.8 % done
sib.fastconf.EADock3: 38.9 % done
sib.fastconf.EADock3: 39.0 % done
sib.fastconf.EADock3: 39.1 % done
sib.fastconf.EADock3: 39.2 % done
sib.fastconf.EADock3: 39.3 % done
sib.fastconf.EADock3: 39.4 % done
sib.fastconf.EADock3: 39.5 % done
sib.fastconf.EADock3: 39.6 % done
sib.fastconf.EADock3: 39.7 % done
sib.fastconf.EADock3: 39.8 % done
sib.fastconf.EADock3: 39.9 % done
sib.fastconf.EADock3: 40.0 % done
sib.fastconf.EADock3: 40.1 % done
sib.fastconf.EADock3: 40.2 % done
sib.fastconf.EADock3: 40.3 % done
sib.fastconf.EADock3: 40.4 % done
sib.fastconf.EADock3: 40.5 % done
sib.fastconf.EADock3: 40.6 % done
sib.fastconf.EADock3: 40.7 % done
sib.fastconf.EADock3: 40.8 % done
sib.fastconf.EADock3: 40.9 % done
sib.fastconf.EADock3: 41.0 % done
sib.fastconf.EADock3: 41.1 % done
sib.fastconf.EADock3: 41.2 % done
sib.fastconf.EADock3: 41.3 % done
sib.fastconf.EADock3: 41.4 % done
sib.fastconf.EADock3: 41.5 % done
sib.fastconf.EADock3: 41.6 % done
sib.fastconf.EADock3: 41.7 % done
sib.fastconf.EADock3: 41.8 % done
sib.fastconf.EADock3: 41.9 % done
sib.fastconf.EADock3: 42.0 % done
sib.fastconf.EADock3: 42.1 % done
sib.fastconf.EADock3: 42.2 % done
sib.fastconf.EADock3: 42.3 % done
sib.fastconf.EADock3: 42.4 % done
sib.fastconf.EADock3: 42.5 % done
sib.fastconf.EADock3: 42.6 % done
sib.fastconf.EADock3: 42.7 % done
sib.fastconf.EADock3: 42.8 % done
sib.fastconf.EADock3: 42.9 % done
sib.fastconf.EADock3: 43.0 % done
sib.fastconf.EADock3: 43.1 % done
sib.fastconf.EADock3: 43.2 % done
sib.fastconf.EADock3: 43.3 % done
sib.fastconf.EADock3: 43.4 % done
sib.fastconf.EADock3: 43.5 % done
sib.fastconf.EADock3: 43.6 % done
sib.fastconf.EADock3: 43.7 % done
sib.fastconf.EADock3: 43.8 % done
sib.fastconf.EADock3: 43.9 % done
sib.fastconf.EADock3: 44.0 % done
sib.fastconf.EADock3: 44.1 % done
sib.fastconf.EADock3: 44.2 % done
sib.fastconf.EADock3: 44.3 % done
sib.fastconf.EADock3: 44.4 % done
sib.fastconf.EADock3: 44.5 % done
sib.fastconf.EADock3: 44.6 % done
sib.fastconf.EADock3: 44.7 % done
sib.fastconf.EADock3: 44.8 % done
sib.fastconf.EADock3: 44.9 % done
sib.fastconf.EADock3: 45.0 % done
sib.fastconf.EADock3: 45.1 % done
sib.fastconf.EADock3: 45.2 % done
sib.fastconf.EADock3: 45.3 % done
sib.fastconf.EADock3: 45.4 % done
sib.fastconf.EADock3: 45.5 % done
sib.fastconf.EADock3: 45.6 % done
sib.fastconf.EADock3: 45.7 % done
sib.fastconf.EADock3: 45.8 % done
sib.fastconf.EADock3: 45.9 % done
sib.fastconf.EADock3: 46.0 % done
sib.fastconf.EADock3: 46.1 % done
sib.fastconf.EADock3: 46.2 % done
sib.fastconf.EADock3: 46.3 % done
sib.fastconf.EADock3: 46.4 % done
sib.fastconf.EADock3: 46.5 % done
sib.fastconf.EADock3: 46.6 % done
sib.fastconf.EADock3: 46.7 % done
sib.fastconf.EADock3: 46.8 % done
sib.fastconf.EADock3: 46.9 % done
sib.fastconf.EADock3: 47.0 % done
sib.fastconf.EADock3: 47.1 % done
sib.fastconf.EADock3: 47.2 % done
sib.fastconf.EADock3: 47.3 % done
sib.fastconf.EADock3: 47.4 % done
sib.fastconf.EADock3: 47.5 % done
sib.fastconf.EADock3: 47.6 % done
sib.fastconf.EADock3: 47.7 % done
sib.fastconf.EADock3: 47.8 % done
sib.fastconf.EADock3: 47.9 % done
sib.fastconf.EADock3: 48.0 % done
sib.fastconf.EADock3: 48.1 % done
sib.fastconf.EADock3: 48.2 % done
sib.fastconf.EADock3: 48.3 % done
sib.fastconf.EADock3: 48.4 % done
sib.fastconf.EADock3: 48.5 % done
sib.fastconf.EADock3: 48.6 % done
sib.fastconf.EADock3: 48.7 % done
sib.fastconf.EADock3: 48.8 % done
sib.fastconf.EADock3: 48.9 % done
sib.fastconf.EADock3: 49.0 % done
sib.fastconf.EADock3: 49.1 % done
sib.fastconf.EADock3: 49.2 % done
sib.fastconf.EADock3: 49.3 % done
sib.fastconf.EADock3: 49.4 % done
sib.fastconf.EADock3: 49.5 % done
sib.fastconf.EADock3: 49.6 % done
sib.fastconf.EADock3: 49.7 % done
sib.fastconf.EADock3: 49.8 % done
sib.fastconf.EADock3: 49.9 % done
sib.fastconf.EADock3: 50.0 % done
sib.fastconf.EADock3: 50.1 % done
sib.fastconf.EADock3: 50.2 % done
sib.fastconf.EADock3: 50.3 % done
sib.fastconf.EADock3: 50.4 % done
sib.fastconf.EADock3: 50.5 % done
sib.fastconf.EADock3: 50.6 % done
sib.fastconf.EADock3: 50.7 % done
sib.fastconf.EADock3: 50.8 % done
sib.fastconf.EADock3: 50.9 % done
sib.fastconf.EADock3: 51.0 % done
sib.fastconf.EADock3: 51.1 % done
sib.fastconf.EADock3: 51.2 % done
sib.fastconf.EADock3: 51.3 % done
sib.fastconf.EADock3: 51.4 % done
sib.fastconf.EADock3: 51.5 % done
sib.fastconf.EADock3: 51.6 % done
sib.fastconf.EADock3: 51.7 % done
sib.fastconf.EADock3: 51.8 % done
sib.fastconf.EADock3: 51.9 % done
sib.fastconf.EADock3: 52.0 % done
sib.fastconf.EADock3: 52.1 % done
sib.fastconf.EADock3: 52.2 % done
sib.fastconf.EADock3: 52.3 % done
sib.fastconf.EADock3: 52.4 % done
sib.fastconf.EADock3: 52.5 % done
sib.fastconf.EADock3: 52.6 % done
sib.fastconf.EADock3: 52.7 % done
sib.fastconf.EADock3: 52.8 % done
sib.fastconf.EADock3: 52.9 % done
sib.fastconf.EADock3: 53.0 % done
sib.fastconf.EADock3: 53.1 % done
sib.fastconf.EADock3: 53.2 % done
sib.fastconf.EADock3: 53.3 % done
sib.fastconf.EADock3: 53.4 % done
sib.fastconf.EADock3: 53.5 % done
sib.fastconf.EADock3: 53.6 % done
sib.fastconf.EADock3: 53.7 % done
sib.fastconf.EADock3: 53.8 % done
sib.fastconf.EADock3: 53.9 % done
sib.fastconf.EADock3: 54.0 % done
sib.fastconf.EADock3: 54.1 % done
sib.fastconf.EADock3: 54.2 % done
sib.fastconf.EADock3: 54.3 % done
sib.fastconf.EADock3: 54.4 % done
sib.fastconf.EADock3: 54.5 % done
sib.fastconf.EADock3: 54.6 % done
sib.fastconf.EADock3: 54.7 % done
sib.fastconf.EADock3: 54.8 % done
sib.fastconf.EADock3: 54.9 % done
sib.fastconf.EADock3: 55.0 % done
sib.fastconf.EADock3: 55.1 % done
sib.fastconf.EADock3: 55.2 % done
sib.fastconf.EADock3: 55.3 % done
sib.fastconf.EADock3: 55.4 % done
sib.fastconf.EADock3: 55.5 % done
sib.fastconf.EADock3: 55.6 % done
sib.fastconf.EADock3: 55.7 % done
sib.fastconf.EADock3: 55.8 % done
sib.fastconf.EADock3: 55.9 % done
sib.fastconf.EADock3: 56.0 % done
sib.fastconf.EADock3: 56.1 % done
sib.fastconf.EADock3: 56.2 % done
sib.fastconf.EADock3: 56.3 % done
sib.fastconf.EADock3: 56.4 % done
sib.fastconf.EADock3: 56.5 % done
sib.fastconf.EADock3: 56.6 % done
sib.fastconf.EADock3: 56.7 % done
sib.fastconf.EADock3: 56.8 % done
sib.fastconf.EADock3: 56.9 % done
sib.fastconf.EADock3: 57.0 % done
sib.fastconf.EADock3: 57.1 % done
sib.fastconf.EADock3: 57.2 % done
sib.fastconf.EADock3: 57.3 % done
sib.fastconf.EADock3: 57.4 % done
sib.fastconf.EADock3: 57.5 % done
sib.fastconf.EADock3: 57.6 % done
sib.fastconf.EADock3: 57.7 % done
sib.fastconf.EADock3: 57.8 % done
sib.fastconf.EADock3: 57.9 % done
sib.fastconf.EADock3: 58.0 % done
sib.fastconf.EADock3: 58.1 % done
sib.fastconf.EADock3: 58.2 % done
sib.fastconf.EADock3: 58.3 % done
sib.fastconf.EADock3: 58.4 % done
sib.fastconf.EADock3: 58.5 % done
sib.fastconf.EADock3: 58.6 % done
sib.fastconf.EADock3: 58.7 % done
sib.fastconf.EADock3: 58.8 % done
sib.fastconf.EADock3: 58.9 % done
sib.fastconf.EADock3: 59.0 % done
sib.fastconf.EADock3: 59.1 % done
sib.fastconf.EADock3: 59.2 % done
sib.fastconf.EADock3: 59.3 % done
sib.fastconf.EADock3: 59.4 % done
sib.fastconf.EADock3: 59.5 % done
sib.fastconf.EADock3: 59.6 % done
sib.fastconf.EADock3: 59.7 % done
sib.fastconf.EADock3: 59.8 % done
sib.fastconf.EADock3: 59.9 % done
sib.fastconf.EADock3: 60.0 % done
sib.fastconf.EADock3: 60.1 % done
sib.fastconf.EADock3: 60.2 % done
sib.fastconf.EADock3: 60.3 % done
sib.fastconf.EADock3: 60.4 % done
sib.fastconf.EADock3: 60.5 % done
sib.fastconf.EADock3: 60.6 % done
sib.fastconf.EADock3: 60.7 % done
sib.fastconf.EADock3: 60.8 % done
sib.fastconf.EADock3: 60.9 % done
sib.fastconf.EADock3: 61.0 % done
sib.fastconf.EADock3: 61.1 % done
sib.fastconf.EADock3: 61.2 % done
sib.fastconf.EADock3: 61.3 % done
sib.fastconf.EADock3: 61.4 % done
sib.fastconf.EADock3: 61.5 % done
sib.fastconf.EADock3: 61.6 % done
sib.fastconf.EADock3: 61.7 % done
sib.fastconf.EADock3: 61.8 % done
sib.fastconf.EADock3: 61.9 % done
sib.fastconf.EADock3: 62.0 % done
sib.fastconf.EADock3: 62.1 % done
sib.fastconf.EADock3: 62.2 % done
sib.fastconf.EADock3: 62.3 % done
sib.fastconf.EADock3: 62.4 % done
sib.fastconf.EADock3: 62.5 % done
sib.fastconf.EADock3: 62.6 % done
sib.fastconf.EADock3: 62.7 % done
sib.fastconf.EADock3: 62.8 % done
sib.fastconf.EADock3: 62.9 % done
sib.fastconf.EADock3: 63.0 % done
sib.fastconf.EADock3: 63.1 % done
sib.fastconf.EADock3: 63.2 % done
sib.fastconf.EADock3: 63.3 % done
sib.fastconf.EADock3: 63.4 % done
sib.fastconf.EADock3: 63.5 % done
sib.fastconf.EADock3: 63.6 % done
sib.fastconf.EADock3: 63.7 % done
sib.fastconf.EADock3: 63.8 % done
sib.fastconf.EADock3: 63.9 % done
sib.fastconf.EADock3: 64.0 % done
sib.fastconf.EADock3: 64.1 % done
sib.fastconf.EADock3: 64.2 % done
sib.fastconf.EADock3: 64.3 % done
sib.fastconf.EADock3: 64.4 % done
sib.fastconf.EADock3: 64.5 % done
sib.fastconf.EADock3: 64.6 % done
sib.fastconf.EADock3: 64.7 % done
sib.fastconf.EADock3: 64.8 % done
sib.fastconf.EADock3: 64.9 % done
sib.fastconf.EADock3: 65.0 % done
sib.fastconf.EADock3: 65.1 % done
sib.fastconf.EADock3: 65.2 % done
sib.fastconf.EADock3: 65.3 % done
sib.fastconf.EADock3: 65.4 % done
sib.fastconf.EADock3: 65.5 % done
sib.fastconf.EADock3: 65.6 % done
sib.fastconf.EADock3: 65.7 % done
sib.fastconf.EADock3: 65.8 % done
sib.fastconf.EADock3: 65.9 % done
sib.fastconf.EADock3: 66.0 % done
sib.fastconf.EADock3: 66.1 % done
sib.fastconf.EADock3: 66.2 % done
sib.fastconf.EADock3: 66.3 % done
sib.fastconf.EADock3: 66.4 % done
sib.fastconf.EADock3: 66.5 % done
sib.fastconf.EADock3: 66.6 % done
sib.fastconf.EADock3: 66.7 % done
sib.fastconf.EADock3: 66.8 % done
sib.fastconf.EADock3: 66.9 % done
sib.fastconf.EADock3: 67.0 % done
sib.fastconf.EADock3: 67.1 % done
sib.fastconf.EADock3: 67.2 % done
sib.fastconf.EADock3: 67.3 % done
sib.fastconf.EADock3: 67.4 % done
sib.fastconf.EADock3: 67.5 % done
sib.fastconf.EADock3: 67.6 % done
sib.fastconf.EADock3: 67.7 % done
sib.fastconf.EADock3: 67.8 % done
sib.fastconf.EADock3: 67.9 % done
sib.fastconf.EADock3: 68.0 % done
sib.fastconf.EADock3: 68.1 % done
sib.fastconf.EADock3: 68.2 % done
sib.fastconf.EADock3: 68.3 % done
sib.fastconf.EADock3: 68.4 % done
sib.fastconf.EADock3: 68.5 % done
sib.fastconf.EADock3: 68.6 % done
sib.fastconf.EADock3: 68.7 % done
sib.fastconf.EADock3: 68.8 % done
sib.fastconf.EADock3: 68.9 % done
sib.fastconf.EADock3: 69.0 % done
sib.fastconf.EADock3: 69.1 % done
sib.fastconf.EADock3: 69.2 % done
sib.fastconf.EADock3: 69.3 % done
sib.fastconf.EADock3: 69.4 % done
sib.fastconf.EADock3: 69.5 % done
sib.fastconf.EADock3: 69.6 % done
sib.fastconf.EADock3: 69.7 % done
sib.fastconf.EADock3: 69.8 % done
sib.fastconf.EADock3: 69.9 % done
sib.fastconf.EADock3: 70.0 % done
sib.fastconf.EADock3: 70.1 % done
sib.fastconf.EADock3: 70.2 % done
sib.fastconf.EADock3: 70.3 % done
sib.fastconf.EADock3: 70.4 % done
sib.fastconf.EADock3: 70.5 % done
sib.fastconf.EADock3: 70.6 % done
sib.fastconf.EADock3: 70.7 % done
sib.fastconf.EADock3: 70.8 % done
sib.fastconf.EADock3: 70.9 % done
sib.fastconf.EADock3: 71.0 % done
sib.fastconf.EADock3: 71.1 % done
sib.fastconf.EADock3: 71.2 % done
sib.fastconf.EADock3: 71.3 % done
sib.fastconf.EADock3: 71.4 % done
sib.fastconf.EADock3: 71.5 % done
sib.fastconf.EADock3: 71.6 % done
sib.fastconf.EADock3: 71.7 % done
sib.fastconf.EADock3: 71.8 % done
sib.fastconf.EADock3: 71.9 % done
sib.fastconf.EADock3: 72.0 % done
sib.fastconf.EADock3: 72.1 % done
sib.fastconf.EADock3: 72.2 % done
sib.fastconf.EADock3: 72.3 % done
sib.fastconf.EADock3: 72.4 % done
sib.fastconf.EADock3: 72.5 % done
sib.fastconf.EADock3: 72.6 % done
sib.fastconf.EADock3: 72.7 % done
sib.fastconf.EADock3: 72.8 % done
sib.fastconf.EADock3: 72.9 % done
sib.fastconf.EADock3: 73.0 % done
sib.fastconf.EADock3: 73.1 % done
sib.fastconf.EADock3: 73.2 % done
sib.fastconf.EADock3: 73.3 % done
sib.fastconf.EADock3: 73.4 % done
sib.fastconf.EADock3: 73.5 % done
sib.fastconf.EADock3: 73.6 % done
sib.fastconf.EADock3: 73.7 % done
sib.fastconf.EADock3: 73.8 % done
sib.fastconf.EADock3: 73.9 % done
sib.fastconf.EADock3: 74.0 % done
sib.fastconf.EADock3: 74.1 % done
sib.fastconf.EADock3: 74.2 % done
sib.fastconf.EADock3: 74.3 % done
sib.fastconf.EADock3: 74.4 % done
sib.fastconf.EADock3: 74.5 % done
sib.fastconf.EADock3: 74.6 % done
sib.fastconf.EADock3: 74.7 % done
sib.fastconf.EADock3: 74.8 % done
sib.fastconf.EADock3: 74.9 % done
sib.fastconf.EADock3: 75.0 % done
sib.fastconf.EADock3: 75.1 % done
sib.fastconf.EADock3: 75.2 % done
sib.fastconf.EADock3: 75.3 % done
sib.fastconf.EADock3: 75.4 % done
sib.fastconf.EADock3: 75.5 % done
sib.fastconf.EADock3: 75.6 % done
sib.fastconf.EADock3: 75.7 % done
sib.fastconf.EADock3: 75.8 % done
sib.fastconf.EADock3: 75.9 % done
sib.fastconf.EADock3: 76.0 % done
sib.fastconf.EADock3: 76.1 % done
sib.fastconf.EADock3: 76.2 % done
sib.fastconf.EADock3: 76.3 % done
sib.fastconf.EADock3: 76.4 % done
sib.fastconf.EADock3: 76.5 % done
sib.fastconf.EADock3: 76.6 % done
sib.fastconf.EADock3: 76.7 % done
sib.fastconf.EADock3: 76.8 % done
sib.fastconf.EADock3: 76.9 % done
sib.fastconf.EADock3: 77.0 % done
sib.fastconf.EADock3: 77.1 % done
sib.fastconf.EADock3: 77.2 % done
sib.fastconf.EADock3: 77.3 % done
sib.fastconf.EADock3: 77.4 % done
sib.fastconf.EADock3: 77.5 % done
sib.fastconf.EADock3: 77.6 % done
sib.fastconf.EADock3: 77.7 % done
sib.fastconf.EADock3: 77.8 % done
sib.fastconf.EADock3: 77.9 % done
sib.fastconf.EADock3: 78.0 % done
sib.fastconf.EADock3: 78.1 % done
sib.fastconf.EADock3: 78.2 % done
sib.fastconf.EADock3: 78.3 % done
sib.fastconf.EADock3: 78.4 % done
sib.fastconf.EADock3: 78.5 % done
sib.fastconf.EADock3: 78.6 % done
sib.fastconf.EADock3: 78.7 % done
sib.fastconf.EADock3: 78.8 % done
sib.fastconf.EADock3: 78.9 % done
sib.fastconf.EADock3: 79.0 % done
sib.fastconf.EADock3: 79.1 % done
sib.fastconf.EADock3: 79.2 % done
sib.fastconf.EADock3: 79.3 % done
sib.fastconf.EADock3: 79.4 % done
sib.fastconf.EADock3: 79.5 % done
sib.fastconf.EADock3: 79.6 % done
sib.fastconf.EADock3: 79.7 % done
sib.fastconf.EADock3: 79.8 % done
sib.fastconf.EADock3: 79.9 % done
sib.fastconf.EADock3: 80.0 % done
sib.fastconf.EADock3: 80.1 % done
sib.fastconf.EADock3: 80.2 % done
sib.fastconf.EADock3: 80.3 % done
sib.fastconf.EADock3: 80.4 % done
sib.fastconf.EADock3: 80.5 % done
sib.fastconf.EADock3: 80.6 % done
sib.fastconf.EADock3: 80.7 % done
sib.fastconf.EADock3: 80.8 % done
sib.fastconf.EADock3: 80.9 % done
sib.fastconf.EADock3: 81.0 % done
sib.fastconf.EADock3: 81.1 % done
sib.fastconf.EADock3: 81.2 % done
sib.fastconf.EADock3: 81.3 % done
sib.fastconf.EADock3: 81.4 % done
sib.fastconf.EADock3: 81.5 % done
sib.fastconf.EADock3: 81.6 % done
sib.fastconf.EADock3: 81.7 % done
sib.fastconf.EADock3: 81.8 % done
sib.fastconf.EADock3: 81.9 % done
sib.fastconf.EADock3: 82.0 % done
sib.fastconf.EADock3: 82.1 % done
sib.fastconf.EADock3: 82.2 % done
sib.fastconf.EADock3: 82.3 % done
sib.fastconf.EADock3: 82.4 % done
sib.fastconf.EADock3: 82.5 % done
sib.fastconf.EADock3: 82.6 % done
sib.fastconf.EADock3: 82.7 % done
sib.fastconf.EADock3: 82.8 % done
sib.fastconf.EADock3: 82.9 % done
sib.fastconf.EADock3: 83.0 % done
sib.fastconf.EADock3: 83.1 % done
sib.fastconf.EADock3: 83.2 % done
sib.fastconf.EADock3: 83.3 % done
sib.fastconf.EADock3: 83.4 % done
sib.fastconf.EADock3: 83.5 % done
sib.fastconf.EADock3: 83.6 % done
sib.fastconf.EADock3: 83.7 % done
sib.fastconf.EADock3: 83.8 % done
sib.fastconf.EADock3: 83.9 % done
sib.fastconf.EADock3: 84.0 % done
sib.fastconf.EADock3: 84.1 % done
sib.fastconf.EADock3: 84.2 % done
sib.fastconf.EADock3: 84.3 % done
sib.fastconf.EADock3: 84.4 % done
sib.fastconf.EADock3: 84.5 % done
sib.fastconf.EADock3: 84.6 % done
sib.fastconf.EADock3: 84.7 % done
sib.fastconf.EADock3: 84.8 % done
sib.fastconf.EADock3: 84.9 % done
sib.fastconf.EADock3: 85.0 % done
sib.fastconf.EADock3: 85.1 % done
sib.fastconf.EADock3: 85.2 % done
sib.fastconf.EADock3: 85.3 % done
sib.fastconf.EADock3: 85.4 % done
sib.fastconf.EADock3: 85.5 % done
sib.fastconf.EADock3: 85.6 % done
sib.fastconf.EADock3: 85.7 % done
sib.fastconf.EADock3: 85.8 % done
sib.fastconf.EADock3: 85.9 % done
sib.fastconf.EADock3: 86.0 % done
sib.fastconf.EADock3: 86.1 % done
sib.fastconf.EADock3: 86.2 % done
sib.fastconf.EADock3: 86.3 % done
sib.fastconf.EADock3: 86.4 % done
sib.fastconf.EADock3: 86.5 % done
sib.fastconf.EADock3: 86.6 % done
sib.fastconf.EADock3: 86.7 % done
sib.fastconf.EADock3: 86.8 % done
sib.fastconf.EADock3: 86.9 % done
sib.fastconf.EADock3: 87.0 % done
sib.fastconf.EADock3: 87.1 % done
sib.fastconf.EADock3: 87.2 % done
sib.fastconf.EADock3: 87.3 % done
sib.fastconf.EADock3: 87.4 % done
sib.fastconf.EADock3: 87.5 % done
sib.fastconf.EADock3: 87.6 % done
sib.fastconf.EADock3: 87.7 % done
sib.fastconf.EADock3: 87.8 % done
sib.fastconf.EADock3: 87.9 % done
sib.fastconf.EADock3: 88.0 % done
sib.fastconf.EADock3: 88.1 % done
sib.fastconf.EADock3: 88.2 % done
sib.fastconf.EADock3: 88.3 % done
sib.fastconf.EADock3: 88.4 % done
sib.fastconf.EADock3: 88.5 % done
sib.fastconf.EADock3: 88.6 % done
sib.fastconf.EADock3: 88.7 % done
sib.fastconf.EADock3: 88.8 % done
sib.fastconf.EADock3: 88.9 % done
sib.fastconf.EADock3: 89.0 % done
sib.fastconf.EADock3: 89.1 % done
sib.fastconf.EADock3: 89.2 % done
sib.fastconf.EADock3: 89.3 % done
sib.fastconf.EADock3: 89.4 % done
sib.fastconf.EADock3: 89.5 % done
sib.fastconf.EADock3: 89.6 % done
sib.fastconf.EADock3: 89.7 % done
sib.fastconf.EADock3: 89.8 % done
sib.fastconf.EADock3: 89.9 % done
sib.fastconf.EADock3: 90.0 % done
sib.fastconf.EADock3: 90.1 % done
sib.fastconf.EADock3: 90.2 % done
sib.fastconf.EADock3: 90.3 % done
sib.fastconf.EADock3: 90.4 % done
sib.fastconf.EADock3: 90.5 % done
sib.fastconf.EADock3: 90.6 % done
sib.fastconf.EADock3: 90.7 % done
sib.fastconf.EADock3: 90.8 % done
sib.fastconf.EADock3: 90.9 % done
sib.fastconf.EADock3: 91.0 % done
sib.fastconf.EADock3: 91.1 % done
sib.fastconf.EADock3: 91.2 % done
sib.fastconf.EADock3: 91.3 % done
sib.fastconf.EADock3: 91.4 % done
sib.fastconf.EADock3: 91.5 % done
sib.fastconf.EADock3: 91.6 % done
sib.fastconf.EADock3: 91.7 % done
sib.fastconf.EADock3: 91.8 % done
sib.fastconf.EADock3: 91.9 % done
sib.fastconf.EADock3: 92.0 % done
sib.fastconf.EADock3: 92.1 % done
sib.fastconf.EADock3: 92.2 % done
sib.fastconf.EADock3: 92.3 % done
sib.fastconf.EADock3: 92.4 % done
sib.fastconf.EADock3: 92.5 % done
sib.fastconf.EADock3: 92.6 % done
sib.fastconf.EADock3: 92.7 % done
sib.fastconf.EADock3: 92.8 % done
sib.fastconf.EADock3: 92.9 % done
sib.fastconf.EADock3: 93.0 % done
sib.fastconf.EADock3: 93.1 % done
sib.fastconf.EADock3: 93.2 % done
sib.fastconf.EADock3: 93.3 % done
sib.fastconf.EADock3: 93.4 % done
sib.fastconf.EADock3: 93.5 % done
sib.fastconf.EADock3: 93.6 % done
sib.fastconf.EADock3: 93.7 % done
sib.fastconf.EADock3: 93.8 % done
sib.fastconf.EADock3: 93.9 % done
sib.fastconf.EADock3: 94.0 % done
sib.fastconf.EADock3: 94.1 % done
sib.fastconf.EADock3: 94.2 % done
sib.fastconf.EADock3: 94.3 % done
sib.fastconf.EADock3: 94.4 % done
sib.fastconf.EADock3: 94.5 % done
sib.fastconf.EADock3: 94.6 % done
sib.fastconf.EADock3: 94.7 % done
sib.fastconf.EADock3: 94.8 % done
sib.fastconf.EADock3: 94.9 % done
sib.fastconf.EADock3: 95.0 % done
sib.fastconf.EADock3: 95.1 % done
sib.fastconf.EADock3: 95.2 % done
sib.fastconf.EADock3: 95.3 % done
sib.fastconf.EADock3: 95.4 % done
sib.fastconf.EADock3: 95.5 % done
sib.fastconf.EADock3: 95.6 % done
sib.fastconf.EADock3: 95.7 % done
sib.fastconf.EADock3: 95.8 % done
sib.fastconf.EADock3: 95.9 % done
sib.fastconf.EADock3: 96.0 % done
sib.fastconf.EADock3: 96.1 % done
sib.fastconf.EADock3: 96.2 % done
sib.fastconf.EADock3: 96.3 % done
sib.fastconf.EADock3: 96.4 % done
sib.fastconf.EADock3: 96.5 % done
sib.fastconf.EADock3: 96.6 % done
sib.fastconf.EADock3: 96.7 % done
sib.fastconf.EADock3: 96.8 % done
sib.fastconf.EADock3: 96.9 % done
sib.fastconf.EADock3: 97.0 % done
sib.fastconf.EADock3: 97.1 % done
sib.fastconf.EADock3: 97.2 % done
sib.fastconf.EADock3: 97.3 % done
sib.fastconf.EADock3: 97.4 % done
sib.fastconf.EADock3: 97.5 % done
sib.fastconf.EADock3: 97.6 % done
sib.fastconf.EADock3: 97.7 % done
sib.fastconf.EADock3: 97.8 % done
sib.fastconf.EADock3: 97.9 % done
sib.fastconf.EADock3: 98.0 % done
sib.fastconf.EADock3: 98.1 % done
sib.fastconf.EADock3: 98.2 % done
sib.fastconf.EADock3: 98.3 % done
sib.fastconf.EADock3: 98.4 % done
sib.fastconf.EADock3: 98.5 % done
sib.fastconf.EADock3: 98.6 % done
sib.fastconf.EADock3: 98.7 % done
sib.fastconf.EADock3: 98.8 % done
sib.fastconf.EADock3: 98.9 % done
sib.fastconf.EADock3: 99.0 % done
sib.fastconf.EADock3: 99.1 % done
sib.fastconf.EADock3: 99.2 % done
sib.fastconf.EADock3: 99.3 % done
sib.fastconf.EADock3: 99.4 % done
sib.fastconf.EADock3: 99.5 % done
sib.fastconf.EADock3: 99.6 % done
sib.fastconf.EADock3: 99.7 % done
sib.fastconf.EADock3: 99.8 % done
sib.fastconf.EADock3: 99.9 % done
sib.fastconf.EADock3: 100.0 % done
sib.fastconf.EADock3: The generation of 3813 conformations took 380580 s
sib.fastconf.EADock3: The DSS engine failed 35588 times to find a suitable BMs within the allowed time limit of 500 ms
sib.fastconf.EADock3: Minimizing binding mode 0, energy is -2423.0144, rmsd is 42.020725
sib.fastconf.EADock3: Minimizing binding mode 1, energy is -1792.3217, rmsd is 37.317627
sib.fastconf.EADock3: Minimizing binding mode 2, energy is -1770.1915, rmsd is 41.533756
sib.fastconf.EADock3: Minimizing binding mode 3, energy is -882.3696, rmsd is 45.45122
sib.fastconf.EADock3: Minimizing binding mode 4, energy is -620.0152, rmsd is 38.06747
sib.fastconf.EADock3: Minimizing binding mode 5, energy is -473.08853, rmsd is 46.202732
sib.fastconf.EADock3: Minimizing binding mode 6, energy is -378.59207, rmsd is 48.692684
sib.fastconf.EADock3: Minimizing binding mode 7, energy is -368.6651, rmsd is 3.4657097
sib.fastconf.EADock3: Minimizing binding mode 8, energy is -360.3187, rmsd is 12.406086
sib.fastconf.EADock3: Minimizing binding mode 9, energy is -290.50226, rmsd is 47.04126
sib.fastconf.EADock3: Minimizing binding mode 10, energy is -226.44304, rmsd is 45.423157
sib.fastconf.EADock3: Minimizing binding mode 11, energy is -111.37622, rmsd is 66.72198
sib.fastconf.EADock3: Minimizing binding mode 12, energy is -70.298195, rmsd is 43.88257
sib.fastconf.EADock3: Minimizing binding mode 13, energy is -40.33208, rmsd is 32.56094
sib.fastconf.EADock3: Minimizing binding mode 14, energy is -36.20985, rmsd is 39.910374
sib.fastconf.EADock3: Minimizing binding mode 15, energy is -29.751402, rmsd is 30.824083
sib.fastconf.EADock3: Minimizing binding mode 16, energy is -26.697311, rmsd is 3.0132163
sib.fastconf.EADock3: Minimizing binding mode 17, energy is 13.945999, rmsd is 16.625738
sib.fastconf.EADock3: Minimizing binding mode 18, energy is 18.6731, rmsd is 36.337788
sib.fastconf.EADock3: Minimizing binding mode 19, energy is 30.438343, rmsd is 34.862778
sib.fastconf.EADock3: Minimizing binding mode 20, energy is 48.728626, rmsd is 3.6364527
sib.fastconf.EADock3: Minimizing binding mode 21, energy is 64.64596, rmsd is 3.8911707
sib.fastconf.EADock3: Minimizing binding mode 22, energy is 71.8487, rmsd is 39.804825
sib.fastconf.EADock3: Minimizing binding mode 23, energy is 89.538956, rmsd is 1.5364965
sib.fastconf.EADock3: Minimizing binding mode 24, energy is 90.940506, rmsd is 35.399117
sib.fastconf.EADock3: Minimizing binding mode 25, energy is 94.54869, rmsd is 34.694374
sib.fastconf.EADock3: Minimizing binding mode 26, energy is 118.58895, rmsd is 46.464447
sib.fastconf.EADock3: Minimizing binding mode 27, energy is 120.80324, rmsd is 31.65636
sib.fastconf.EADock3: Minimizing binding mode 28, energy is 121.111305, rmsd is 1.0970292
sib.fastconf.EADock3: Minimizing binding mode 29, energy is 124.18121, rmsd is 1.9364113
sib.fastconf.EADock3: Minimizing binding mode 30, energy is 124.295906, rmsd is 42.733612
sib.fastconf.EADock3: Minimizing binding mode 31, energy is 125.06356, rmsd is 32.172195
sib.fastconf.EADock3: Minimizing binding mode 32, energy is 126.488914, rmsd is 64.342545
sib.fastconf.EADock3: Minimizing binding mode 33, energy is 126.67815, rmsd is 1.3921634
sib.fastconf.EADock3: Minimizing binding mode 34, energy is 126.73803, rmsd is 34.626434
sib.fastconf.EADock3: Minimizing binding mode 35, energy is 127.491714, rmsd is 36.637257
sib.fastconf.EADock3: Minimizing binding mode 36, energy is 127.87464, rmsd is 43.43903
sib.fastconf.EADock3: Minimizing binding mode 37, energy is 127.986626, rmsd is 36.770042
sib.fastconf.EADock3: Minimizing binding mode 38, energy is 129.23561, rmsd is 43.160202
sib.fastconf.EADock3: Minimizing binding mode 39, energy is 129.4208, rmsd is 46.687027
sib.fastconf.EADock3: Minimizing binding mode 40, energy is 129.55513, rmsd is 45.29395
sib.fastconf.EADock3: Minimizing binding mode 41, energy is 130.81392, rmsd is 30.208624
sib.fastconf.EADock3: Minimizing binding mode 42, energy is 130.86763, rmsd is 45.951214
sib.fastconf.EADock3: Minimizing binding mode 43, energy is 131.02861, rmsd is 43.038727
sib.fastconf.EADock3: Minimizing binding mode 44, energy is 132.88815, rmsd is 1.9207245
sib.fastconf.EADock3: Minimizing binding mode 45, energy is 132.96611, rmsd is 65.582565
sib.fastconf.EADock3: Minimizing binding mode 46, energy is 133.3829, rmsd is 3.2911248
sib.fastconf.EADock3: Minimizing binding mode 47, energy is 133.55844, rmsd is 38.026684
sib.fastconf.EADock3: Minimizing binding mode 48, energy is 135.11057, rmsd is 66.16822
sib.fastconf.EADock3: Minimizing binding mode 49, energy is 135.84868, rmsd is 2.3433917
sib.fastconf.EADock3: Minimizing binding mode 50, energy is 136.74123, rmsd is 32.4082
sib.fastconf.EADock3: Minimizing binding mode 51, energy is 138.20395, rmsd is 2.301408
sib.fastconf.EADock3: Minimizing binding mode 52, energy is 139.44182, rmsd is 2.06829
sib.fastconf.EADock3: Minimizing binding mode 53, energy is 139.6124, rmsd is 38.33682
sib.fastconf.EADock3: Minimizing binding mode 54, energy is 139.75554, rmsd is 45.07617
sib.fastconf.EADock3: Minimizing binding mode 55, energy is 140.42007, rmsd is 31.249681
sib.fastconf.EADock3: Minimizing binding mode 56, energy is 140.65552, rmsd is 2.7643373
sib.fastconf.EADock3: Minimizing binding mode 57, energy is 141.83, rmsd is 2.2114575
sib.fastconf.EADock3: Minimizing binding mode 58, energy is 142.34534, rmsd is 45.765045
sib.fastconf.EADock3: Minimizing binding mode 59, energy is 142.46968, rmsd is 37.001472
sib.fastconf.EADock3: Minimizing binding mode 60, energy is 142.57095, rmsd is 30.880985
sib.fastconf.EADock3: Minimizing binding mode 61, energy is 143.50067, rmsd is 33.18933
sib.fastconf.EADock3: Minimizing binding mode 62, energy is 143.95442, rmsd is 32.1547
sib.fastconf.EADock3: Minimizing binding mode 63, energy is 144.03314, rmsd is 37.843323
sib.fastconf.EADock3: Minimizing binding mode 64, energy is 144.18529, rmsd is 65.50026
sib.fastconf.EADock3: Minimizing binding mode 65, energy is 145.42645, rmsd is 2.2796457
sib.fastconf.EADock3: Minimizing binding mode 66, energy is 146.26166, rmsd is 45.76957
sib.fastconf.EADock3: Minimizing binding mode 67, energy is 146.29056, rmsd is 33.706425
sib.fastconf.EADock3: Minimizing binding mode 68, energy is 146.46124, rmsd is 30.004766
sib.fastconf.EADock3: Minimizing binding mode 69, energy is 146.60617, rmsd is 65.62285
sib.fastconf.EADock3: Minimizing binding mode 70, energy is 146.81879, rmsd is 31.146843
sib.fastconf.EADock3: Minimizing binding mode 71, energy is 147.10413, rmsd is 3.3449006
sib.fastconf.EADock3: Minimizing binding mode 72, energy is 147.37009, rmsd is 30.44372
sib.fastconf.EADock3: Minimizing binding mode 73, energy is 147.51683, rmsd is 2.9406466
sib.fastconf.EADock3: Minimizing binding mode 74, energy is 147.58022, rmsd is 0.96217227
sib.fastconf.EADock3: Minimizing binding mode 75, energy is 147.99057, rmsd is 1.5461745
sib.fastconf.EADock3: Minimizing binding mode 76, energy is 148.2321, rmsd is 34.383003
sib.fastconf.EADock3: Minimizing binding mode 77, energy is 148.29279, rmsd is 43.019848
sib.fastconf.EADock3: Minimizing binding mode 78, energy is 148.91371, rmsd is 31.361229
sib.fastconf.EADock3: Minimizing binding mode 79, energy is 149.47643, rmsd is 32.21939
sib.fastconf.EADock3: Minimizing binding mode 80, energy is 149.65604, rmsd is 30.4422
sib.fastconf.EADock3: Minimizing binding mode 81, energy is 149.77988, rmsd is 2.2539425
sib.fastconf.EADock3: Minimizing binding mode 82, energy is 150.18976, rmsd is 43.505867
sib.fastconf.EADock3: Minimizing binding mode 83, energy is 150.31729, rmsd is 66.10076
sib.fastconf.EADock3: Minimizing binding mode 84, energy is 150.49289, rmsd is 45.00443
sib.fastconf.EADock3: Minimizing binding mode 85, energy is 150.58017, rmsd is 30.1093
sib.fastconf.EADock3: Minimizing binding mode 86, energy is 150.84291, rmsd is 1.7022254
sib.fastconf.EADock3: Minimizing binding mode 87, energy is 151.14333, rmsd is 38.31106
sib.fastconf.EADock3: Minimizing binding mode 88, energy is 151.22687, rmsd is 41.574284
sib.fastconf.EADock3: Minimizing binding mode 89, energy is 151.60487, rmsd is 31.377232
sib.fastconf.EADock3: Minimizing binding mode 90, energy is 151.68153, rmsd is 33.8528
sib.fastconf.EADock3: Minimizing binding mode 91, energy is 151.86528, rmsd is 44.561638
sib.fastconf.EADock3: Minimizing binding mode 92, energy is 152.57462, rmsd is 2.9115674
sib.fastconf.EADock3: Minimizing binding mode 93, energy is 153.04742, rmsd is 32.873035
sib.fastconf.EADock3: Minimizing binding mode 94, energy is 153.6978, rmsd is 64.8715
sib.fastconf.EADock3: Minimizing binding mode 95, energy is 154.0112, rmsd is 3.2089102
sib.fastconf.EADock3: Minimizing binding mode 96, energy is 154.2053, rmsd is 39.089283
sib.fastconf.EADock3: Minimizing binding mode 97, energy is 154.47821, rmsd is 40.094646
sib.fastconf.EADock3: Minimizing binding mode 98, energy is 154.56319, rmsd is 2.1564996
sib.fastconf.EADock3: Minimizing binding mode 99, energy is 154.96448, rmsd is 46.024616
sib.fastconf.EADock3: Minimizing binding mode 100, energy is 155.10307, rmsd is 38.0046
sib.fastconf.EADock3: Minimizing binding mode 101, energy is 155.48318, rmsd is 28.804365
sib.fastconf.EADock3: Minimizing binding mode 102, energy is 156.06087, rmsd is 32.08265
sib.fastconf.EADock3: Minimizing binding mode 103, energy is 156.36476, rmsd is 3.1692367
sib.fastconf.EADock3: Minimizing binding mode 104, energy is 156.44617, rmsd is 40.454906
sib.fastconf.EADock3: Minimizing binding mode 105, energy is 156.53069, rmsd is 2.5782444
sib.fastconf.EADock3: Minimizing binding mode 106, energy is 156.76129, rmsd is 2.8154097
sib.fastconf.EADock3: Minimizing binding mode 107, energy is 156.7624, rmsd is 32.878246
sib.fastconf.EADock3: Minimizing binding mode 108, energy is 156.9684, rmsd is 31.304958
sib.fastconf.EADock3: Minimizing binding mode 109, energy is 157.15085, rmsd is 41.764797
sib.fastconf.EADock3: Minimizing binding mode 110, energy is 157.19922, rmsd is 1.818956
sib.fastconf.EADock3: Minimizing binding mode 111, energy is 157.39809, rmsd is 11.24185
sib.fastconf.EADock3: Minimizing binding mode 112, energy is 157.40794, rmsd is 38.546925
sib.fastconf.EADock3: Minimizing binding mode 113, energy is 157.49318, rmsd is 2.779564
sib.fastconf.EADock3: Minimizing binding mode 114, energy is 157.64143, rmsd is 49.00119
sib.fastconf.EADock3: Minimizing binding mode 115, energy is 157.89404, rmsd is 44.966408
sib.fastconf.EADock3: Minimizing binding mode 116, energy is 157.89424, rmsd is 32.39078
sib.fastconf.EADock3: Minimizing binding mode 117, energy is 158.26105, rmsd is 35.805943
sib.fastconf.EADock3: Minimizing binding mode 118, energy is 158.35664, rmsd is 45.195972
sib.fastconf.EADock3: Minimizing binding mode 119, energy is 159.1977, rmsd is 1.0267788
sib.fastconf.EADock3: Minimizing binding mode 120, energy is 159.26216, rmsd is 2.2001197
sib.fastconf.EADock3: Minimizing binding mode 121, energy is 159.34201, rmsd is 2.464062
sib.fastconf.EADock3: Minimizing binding mode 122, energy is 159.53659, rmsd is 2.0951557
sib.fastconf.EADock3: Minimizing binding mode 123, energy is 160.01118, rmsd is 43.461334
sib.fastconf.EADock3: Minimizing binding mode 124, energy is 160.1116, rmsd is 36.388863
sib.fastconf.EADock3: Minimizing binding mode 125, energy is 160.15352, rmsd is 1.455523
sib.fastconf.EADock3: Minimizing binding mode 126, energy is 160.4902, rmsd is 34.690292
sib.fastconf.EADock3: Minimizing binding mode 127, energy is 160.63077, rmsd is 35.270985
sib.fastconf.EADock3: Minimizing binding mode 128, energy is 160.68127, rmsd is 41.61192
sib.fastconf.EADock3: Minimizing binding mode 129, energy is 160.71545, rmsd is 1.0461327
sib.fastconf.EADock3: Minimizing binding mode 130, energy is 160.84627, rmsd is 36.37743
sib.fastconf.EADock3: Minimizing binding mode 131, energy is 161.03165, rmsd is 46.28103
sib.fastconf.EADock3: Minimizing binding mode 132, energy is 161.60097, rmsd is 46.684032
sib.fastconf.EADock3: Minimizing binding mode 133, energy is 161.84196, rmsd is 35.233448
sib.fastconf.EADock3: Minimizing binding mode 134, energy is 162.11203, rmsd is 46.655716
sib.fastconf.EADock3: Minimizing binding mode 135, energy is 162.69214, rmsd is 1.9236193
sib.fastconf.EADock3: Minimizing binding mode 136, energy is 162.69675, rmsd is 2.2095213
sib.fastconf.EADock3: Minimizing binding mode 137, energy is 162.735, rmsd is 41.663837
sib.fastconf.EADock3: Minimizing binding mode 138, energy is 163.0447, rmsd is 2.5344813
sib.fastconf.EADock3: Minimizing binding mode 139, energy is 163.16074, rmsd is 1.6259687
sib.fastconf.EADock3: Minimizing binding mode 140, energy is 163.18074, rmsd is 45.775677
sib.fastconf.EADock3: Minimizing binding mode 141, energy is 163.26524, rmsd is 65.931595
sib.fastconf.EADock3: Minimizing binding mode 142, energy is 163.55237, rmsd is 31.244812
sib.fastconf.EADock3: Minimizing binding mode 143, energy is 163.68718, rmsd is 64.34225
sib.fastconf.EADock3: Minimizing binding mode 144, energy is 163.69601, rmsd is 37.355663
sib.fastconf.EADock3: Minimizing binding mode 145, energy is 163.83759, rmsd is 2.2204173
sib.fastconf.EADock3: Minimizing binding mode 146, energy is 163.9685, rmsd is 65.635185
sib.fastconf.EADock3: Minimizing binding mode 147, energy is 164.05092, rmsd is 34.361816
sib.fastconf.EADock3: Minimizing binding mode 148, energy is 164.12866, rmsd is 11.337262
sib.fastconf.EADock3: Minimizing binding mode 149, energy is 164.20204, rmsd is 1.834395
sib.fastconf.EADock3: Minimizing binding mode 150, energy is 164.33986, rmsd is 3.021488
sib.fastconf.EADock3: Minimizing binding mode 151, energy is 164.74893, rmsd is 38.615665
sib.fastconf.EADock3: Minimizing binding mode 152, energy is 164.90086, rmsd is 32.196518
sib.fastconf.EADock3: Minimizing binding mode 153, energy is 164.98651, rmsd is 3.1155462
sib.fastconf.EADock3: Minimizing binding mode 154, energy is 165.3437, rmsd is 37.519505
sib.fastconf.EADock3: Minimizing binding mode 155, energy is 165.43567, rmsd is 3.266901
sib.fastconf.EADock3: Minimizing binding mode 156, energy is 165.93256, rmsd is 37.184185
sib.fastconf.EADock3: Minimizing binding mode 157, energy is 166.63934, rmsd is 45.22545
sib.fastconf.EADock3: Minimizing binding mode 158, energy is 166.80003, rmsd is 46.72654
sib.fastconf.EADock3: Minimizing binding mode 159, energy is 166.89995, rmsd is 10.594027
sib.fastconf.EADock3: Minimizing binding mode 160, energy is 166.93443, rmsd is 31.270636
sib.fastconf.EADock3: Minimizing binding mode 161, energy is 166.96924, rmsd is 11.168126
sib.fastconf.EADock3: Minimizing binding mode 162, energy is 167.28679, rmsd is 2.8029015
sib.fastconf.EADock3: Minimizing binding mode 163, energy is 167.29121, rmsd is 36.87868
sib.fastconf.EADock3: Minimizing binding mode 164, energy is 167.31876, rmsd is 33.839134
sib.fastconf.EADock3: Minimizing binding mode 165, energy is 168.1957, rmsd is 3.1486266
sib.fastconf.EADock3: Minimizing binding mode 166, energy is 168.32916, rmsd is 42.34802
sib.fastconf.EADock3: Minimizing binding mode 167, energy is 168.55847, rmsd is 42.422
sib.fastconf.EADock3: Minimizing binding mode 168, energy is 168.89146, rmsd is 39.791874
sib.fastconf.EADock3: Minimizing binding mode 169, energy is 168.92596, rmsd is 30.968218
sib.fastconf.EADock3: Minimizing binding mode 170, energy is 169.1569, rmsd is 36.989132
sib.fastconf.EADock3: Minimizing binding mode 171, energy is 169.83673, rmsd is 45.020565
sib.fastconf.EADock3: Minimizing binding mode 172, energy is 170.0884, rmsd is 1.8271501
sib.fastconf.EADock3: Minimizing binding mode 173, energy is 170.12975, rmsd is 30.274584
sib.fastconf.EADock3: Minimizing binding mode 174, energy is 170.14616, rmsd is 38.566544
sib.fastconf.EADock3: Minimizing binding mode 175, energy is 170.52739, rmsd is 32.092636
sib.fastconf.EADock3: Minimizing binding mode 176, energy is 170.65205, rmsd is 32.798893
sib.fastconf.EADock3: Minimizing binding mode 177, energy is 170.66618, rmsd is 47.13489
sib.fastconf.EADock3: Minimizing binding mode 178, energy is 171.00249, rmsd is 42.077057
sib.fastconf.EADock3: Minimizing binding mode 179, energy is 171.26935, rmsd is 43.41167
sib.fastconf.EADock3: Minimizing binding mode 180, energy is 171.43822, rmsd is 3.2485654
sib.fastconf.EADock3: Minimizing binding mode 181, energy is 171.45404, rmsd is 37.06493
sib.fastconf.EADock3: Minimizing binding mode 182, energy is 171.74022, rmsd is 3.3344865
sib.fastconf.EADock3: Minimizing binding mode 183, energy is 172.14282, rmsd is 38.335354
sib.fastconf.EADock3: Minimizing binding mode 184, energy is 172.1855, rmsd is 10.871145
sib.fastconf.EADock3: Minimizing binding mode 185, energy is 172.3585, rmsd is 46.292343
sib.fastconf.EADock3: Minimizing binding mode 186, energy is 172.3867, rmsd is 31.88987
sib.fastconf.EADock3: Minimizing binding mode 187, energy is 172.42386, rmsd is 45.556026
sib.fastconf.EADock3: Minimizing binding mode 188, energy is 172.5329, rmsd is 11.243544
sib.fastconf.EADock3: Minimizing binding mode 189, energy is 172.65518, rmsd is 0.98394746
sib.fastconf.EADock3: Minimizing binding mode 190, energy is 172.74588, rmsd is 47.589897
sib.fastconf.EADock3: Minimizing binding mode 191, energy is 172.84413, rmsd is 2.1283185
sib.fastconf.EADock3: Minimizing binding mode 192, energy is 172.93597, rmsd is 38.032898
sib.fastconf.EADock3: Minimizing binding mode 193, energy is 173.03409, rmsd is 28.530865
sib.fastconf.EADock3: Minimizing binding mode 194, energy is 173.10605, rmsd is 41.2236
sib.fastconf.EADock3: Minimizing binding mode 195, energy is 173.14395, rmsd is 17.235598
sib.fastconf.EADock3: Minimizing binding mode 196, energy is 173.40149, rmsd is 31.041283
sib.fastconf.EADock3: Minimizing binding mode 197, energy is 173.44809, rmsd is 2.0672753
sib.fastconf.EADock3: Minimizing binding mode 198, energy is 173.49844, rmsd is 40.63582
sib.fastconf.EADock3: Minimizing binding mode 199, energy is 173.52048, rmsd is 44.63918
sib.fastconf.EADock3: Minimizing binding mode 200, energy is 173.76413, rmsd is 32.887543
sib.fastconf.EADock3: Minimizing binding mode 201, energy is 174.04524, rmsd is 34.29346
sib.fastconf.EADock3: Minimizing binding mode 202, energy is 174.05145, rmsd is 31.584957
sib.fastconf.EADock3: Minimizing binding mode 203, energy is 174.13324, rmsd is 30.949902
sib.fastconf.EADock3: Minimizing binding mode 204, energy is 174.33263, rmsd is 35.22965
sib.fastconf.EADock3: Minimizing binding mode 205, energy is 174.42795, rmsd is 45.372334
sib.fastconf.EADock3: Minimizing binding mode 206, energy is 174.67337, rmsd is 31.321838
sib.fastconf.EADock3: Minimizing binding mode 207, energy is 174.77501, rmsd is 41.426346
sib.fastconf.EADock3: Minimizing binding mode 208, energy is 174.9827, rmsd is 31.200048
sib.fastconf.EADock3: Minimizing binding mode 209, energy is 174.9999, rmsd is 2.118605
sib.fastconf.EADock3: Minimizing binding mode 210, energy is 175.14296, rmsd is 34.057495
sib.fastconf.EADock3: Minimizing binding mode 211, energy is 175.18828, rmsd is 2.0511878
sib.fastconf.EADock3: Minimizing binding mode 212, energy is 175.18867, rmsd is 65.53471
sib.fastconf.EADock3: Minimizing binding mode 213, energy is 175.41145, rmsd is 45.984684
sib.fastconf.EADock3: Minimizing binding mode 214, energy is 175.45767, rmsd is 37.24453
sib.fastconf.EADock3: Minimizing binding mode 215, energy is 175.92429, rmsd is 31.256865
sib.fastconf.EADock3: Minimizing binding mode 216, energy is 175.95721, rmsd is 45.02318
sib.fastconf.EADock3: Minimizing binding mode 217, energy is 176.27876, rmsd is 1.7357166
sib.fastconf.EADock3: Minimizing binding mode 218, energy is 176.3863, rmsd is 66.76212
sib.fastconf.EADock3: Minimizing binding mode 219, energy is 176.41019, rmsd is 58.93608
sib.fastconf.EADock3: Minimizing binding mode 220, energy is 176.60968, rmsd is 39.104767
sib.fastconf.EADock3: Minimizing binding mode 221, energy is 176.72377, rmsd is 46.40048
sib.fastconf.EADock3: Minimizing binding mode 222, energy is 176.86194, rmsd is 44.538727
sib.fastconf.EADock3: Minimizing binding mode 223, energy is 177.00635, rmsd is 9.856821
sib.fastconf.EADock3: Minimizing binding mode 224, energy is 177.01593, rmsd is 2.146079
sib.fastconf.EADock3: Minimizing binding mode 225, energy is 177.04108, rmsd is 38.696842
sib.fastconf.EADock3: Minimizing binding mode 226, energy is 177.12138, rmsd is 64.630974
sib.fastconf.EADock3: Minimizing binding mode 227, energy is 177.28922, rmsd is 41.89749
sib.fastconf.EADock3: Minimizing binding mode 228, energy is 177.37561, rmsd is 45.070946
sib.fastconf.EADock3: Minimizing binding mode 229, energy is 177.5107, rmsd is 32.237057
sib.fastconf.EADock3: Minimizing binding mode 230, energy is 177.60506, rmsd is 1.5946788
sib.fastconf.EADock3: Minimizing binding mode 231, energy is 177.67332, rmsd is 67.249146
sib.fastconf.EADock3: Minimizing binding mode 232, energy is 178.30992, rmsd is 40.50605
sib.fastconf.EADock3: Minimizing binding mode 233, energy is 178.71811, rmsd is 65.25431
sib.fastconf.EADock3: Minimizing binding mode 234, energy is 178.80812, rmsd is 33.45776
sib.fastconf.EADock3: Minimizing binding mode 235, energy is 178.84383, rmsd is 12.469953
sib.fastconf.EADock3: Minimizing binding mode 236, energy is 178.97787, rmsd is 46.57267
sib.fastconf.EADock3: Minimizing binding mode 237, energy is 179.11996, rmsd is 45.020393
sib.fastconf.EADock3: Minimizing binding mode 238, energy is 179.29922, rmsd is 45.015835
sib.fastconf.EADock3: Minimizing binding mode 239, energy is 179.32812, rmsd is 42.724915
sib.fastconf.EADock3: Minimizing binding mode 240, energy is 179.64195, rmsd is 38.61324
sib.fastconf.EADock3: Minimizing binding mode 241, energy is 179.82799, rmsd is 2.9256172
sib.fastconf.EADock3: Minimizing binding mode 242, energy is 180.1235, rmsd is 65.20999
sib.fastconf.EADock3: Minimizing binding mode 243, energy is 180.19211, rmsd is 44.300926
sib.fastconf.EADock3: Minimizing binding mode 244, energy is 180.32637, rmsd is 30.837397
sib.fastconf.EADock3: Minimizing binding mode 245, energy is 180.44049, rmsd is 34.836723
sib.fastconf.EADock3: Minimizing binding mode 246, energy is 180.90164, rmsd is 40.415043
sib.fastconf.EADock3: Minimizing binding mode 247, energy is 181.00156, rmsd is 31.35261
sib.fastconf.EADock3: Minimizing binding mode 248, energy is 181.03067, rmsd is 44.79965
sib.fastconf.EADock3: Minimizing binding mode 249, energy is 181.22931, rmsd is 33.305374
sib.fastconf.EADock3: Minimizing binding mode 250, energy is 181.43051, rmsd is 66.085205
sib.fastconf.EADock3: Minimizing binding mode 251, energy is 181.51274, rmsd is 45.42477
sib.fastconf.EADock3: Minimizing binding mode 252, energy is 181.64491, rmsd is 10.461864
sib.fastconf.EADock3: Minimizing binding mode 253, energy is 182.34006, rmsd is 36.644753
sib.fastconf.EADock3: Minimizing binding mode 254, energy is 182.37755, rmsd is 45.825233
sib.fastconf.EADock3: Minimizing binding mode 255, energy is 183.05647, rmsd is 41.92244
sib.fastconf.EADock3: Minimizing binding mode 256, energy is 183.12762, rmsd is 44.668724
sib.fastconf.EADock3: Minimizing binding mode 257, energy is 183.27888, rmsd is 47.282364
sib.fastconf.EADock3: Minimizing binding mode 258, energy is 183.42343, rmsd is 32.245644
sib.fastconf.EADock3: Minimizing binding mode 259, energy is 183.52092, rmsd is 41.069717
sib.fastconf.EADock3: Minimizing binding mode 260, energy is 183.71782, rmsd is 47.492813
sib.fastconf.EADock3: Minimizing binding mode 261, energy is 183.99184, rmsd is 30.902624
sib.fastconf.EADock3: Minimizing binding mode 262, energy is 184.07544, rmsd is 28.08695
sib.fastconf.EADock3: Minimizing binding mode 263, energy is 184.09682, rmsd is 66.80963
sib.fastconf.EADock3: Minimizing binding mode 264, energy is 184.23485, rmsd is 45.781048
sib.fastconf.EADock3: Minimizing binding mode 265, energy is 184.30983, rmsd is 36.952675
sib.fastconf.EADock3: Minimizing binding mode 266, energy is 184.52467, rmsd is 31.93598
sib.fastconf.EADock3: Minimizing binding mode 267, energy is 184.70322, rmsd is 32.63594
sib.fastconf.EADock3: Minimizing binding mode 268, energy is 184.82332, rmsd is 32.601345
sib.fastconf.EADock3: Minimizing binding mode 269, energy is 185.02805, rmsd is 36.036068
sib.fastconf.EADock3: Minimizing binding mode 270, energy is 185.20375, rmsd is 27.899616
sib.fastconf.EADock3: Minimizing binding mode 271, energy is 185.23727, rmsd is 2.4484751
sib.fastconf.EADock3: Minimizing binding mode 272, energy is 185.39034, rmsd is 44.6276
sib.fastconf.EADock3: Minimizing binding mode 273, energy is 185.72466, rmsd is 33.415802
sib.fastconf.EADock3: Minimizing binding mode 274, energy is 185.73808, rmsd is 1.6089526
sib.fastconf.EADock3: Minimizing binding mode 275, energy is 185.79778, rmsd is 36.22582
sib.fastconf.EADock3: Minimizing binding mode 276, energy is 186.0531, rmsd is 2.4320512
sib.fastconf.EADock3: Minimizing binding mode 277, energy is 186.18549, rmsd is 3.1995182
sib.fastconf.EADock3: Minimizing binding mode 278, energy is 186.30968, rmsd is 66.89723
sib.fastconf.EADock3: Minimizing binding mode 279, energy is 186.45876, rmsd is 1.1278985
sib.fastconf.EADock3: Minimizing binding mode 280, energy is 186.53142, rmsd is 32.01269
sib.fastconf.EADock3: Minimizing binding mode 281, energy is 187.19452, rmsd is 46.03149
sib.fastconf.EADock3: Minimizing binding mode 282, energy is 188.3356, rmsd is 3.0669196
sib.fastconf.EADock3: Minimizing binding mode 283, energy is 188.453, rmsd is 35.670013
sib.fastconf.EADock3: Minimizing binding mode 284, energy is 188.61987, rmsd is 44.32021
sib.fastconf.EADock3: Minimizing binding mode 285, energy is 188.74161, rmsd is 41.537422
sib.fastconf.EADock3: Minimizing binding mode 286, energy is 188.76892, rmsd is 43.088512
sib.fastconf.EADock3: Minimizing binding mode 287, energy is 188.96947, rmsd is 35.07929
sib.fastconf.EADock3: Minimizing binding mode 288, energy is 189.07758, rmsd is 52.37599
sib.fastconf.EADock3: Minimizing binding mode 289, energy is 189.16467, rmsd is 3.1562681
sib.fastconf.EADock3: Minimizing binding mode 290, energy is 189.3424, rmsd is 35.44563
sib.fastconf.EADock3: Minimizing binding mode 291, energy is 189.4455, rmsd is 38.50121
sib.fastconf.EADock3: Minimizing binding mode 292, energy is 189.4765, rmsd is 1.8071921
sib.fastconf.EADock3: Minimizing binding mode 293, energy is 190.16139, rmsd is 10.397023
sib.fastconf.EADock3: Minimizing binding mode 294, energy is 190.3139, rmsd is 64.34565
sib.fastconf.EADock3: Minimizing binding mode 295, energy is 190.37257, rmsd is 32.923138
sib.fastconf.EADock3: Minimizing binding mode 296, energy is 190.38644, rmsd is 33.654537
sib.fastconf.EADock3: Minimizing binding mode 297, energy is 190.45985, rmsd is 30.98964
sib.fastconf.EADock3: Minimizing binding mode 298, energy is 190.6519, rmsd is 42.13423
sib.fastconf.EADock3: Minimizing binding mode 299, energy is 190.76349, rmsd is 65.802246
sib.fastconf.EADock3: Minimizing binding mode 300, energy is 191.49098, rmsd is 41.49277
sib.fastconf.EADock3: Minimizing binding mode 301, energy is 191.76253, rmsd is 30.803427
sib.fastconf.EADock3: Minimizing binding mode 302, energy is 191.82198, rmsd is 47.445606
sib.fastconf.EADock3: Minimizing binding mode 303, energy is 191.87756, rmsd is 41.861073
sib.fastconf.EADock3: Minimizing binding mode 304, energy is 192.2437, rmsd is 41.914333
sib.fastconf.EADock3: Minimizing binding mode 305, energy is 192.35617, rmsd is 40.85887
sib.fastconf.EADock3: Minimizing binding mode 306, energy is 192.58437, rmsd is 2.6447163
sib.fastconf.EADock3: Minimizing binding mode 307, energy is 192.60269, rmsd is 1.5241612
sib.fastconf.EADock3: Minimizing binding mode 308, energy is 192.82289, rmsd is 31.969011
sib.fastconf.EADock3: Minimizing binding mode 309, energy is 193.37259, rmsd is 66.54689
sib.fastconf.EADock3: Minimizing binding mode 310, energy is 193.69876, rmsd is 42.3626
sib.fastconf.EADock3: Minimizing binding mode 311, energy is 193.75177, rmsd is 36.575768
sib.fastconf.EADock3: Minimizing binding mode 312, energy is 193.84721, rmsd is 41.886616
sib.fastconf.EADock3: Minimizing binding mode 313, energy is 194.28235, rmsd is 45.342484
sib.fastconf.EADock3: Minimizing binding mode 314, energy is 194.3634, rmsd is 32.65916
sib.fastconf.EADock3: Minimizing binding mode 315, energy is 194.41325, rmsd is 31.847912
sib.fastconf.EADock3: Minimizing binding mode 316, energy is 194.46808, rmsd is 47.12803
sib.fastconf.EADock3: Minimizing binding mode 317, energy is 194.52975, rmsd is 45.946785
sib.fastconf.EADock3: Minimizing binding mode 318, energy is 194.5754, rmsd is 32.87622
sib.fastconf.EADock3: Minimizing binding mode 319, energy is 194.90596, rmsd is 31.2193
sib.fastconf.EADock3: Minimizing binding mode 320, energy is 195.07645, rmsd is 65.79873
sib.fastconf.EADock3: Minimizing binding mode 321, energy is 195.19641, rmsd is 39.838642
sib.fastconf.EADock3: Minimizing binding mode 322, energy is 195.60873, rmsd is 12.10669
sib.fastconf.EADock3: Minimizing binding mode 323, energy is 195.86162, rmsd is 46.948338
sib.fastconf.EADock3: Minimizing binding mode 324, energy is 195.93507, rmsd is 10.293396
sib.fastconf.EADock3: Minimizing binding mode 325, energy is 196.14682, rmsd is 46.309082
sib.fastconf.EADock3: Minimizing binding mode 326, energy is 196.85342, rmsd is 46.877953
sib.fastconf.EADock3: Minimizing binding mode 327, energy is 196.94388, rmsd is 2.343741
sib.fastconf.EADock3: Minimizing binding mode 328, energy is 197.04593, rmsd is 40.86619
sib.fastconf.EADock3: Minimizing binding mode 329, energy is 197.12935, rmsd is 1.8289527
sib.fastconf.EADock3: Minimizing binding mode 330, energy is 197.17091, rmsd is 36.85161
sib.fastconf.EADock3: Minimizing binding mode 331, energy is 197.43285, rmsd is 44.472572
sib.fastconf.EADock3: Minimizing binding mode 332, energy is 197.47293, rmsd is 2.2523437
sib.fastconf.EADock3: Minimizing binding mode 333, energy is 197.58934, rmsd is 41.802635
sib.fastconf.EADock3: Minimizing binding mode 334, energy is 197.62286, rmsd is 1.7246511
sib.fastconf.EADock3: Minimizing binding mode 335, energy is 197.72487, rmsd is 66.048164
sib.fastconf.EADock3: Minimizing binding mode 336, energy is 197.99374, rmsd is 45.8142
sib.fastconf.EADock3: Minimizing binding mode 337, energy is 198.03363, rmsd is 2.9564579
sib.fastconf.EADock3: Minimizing binding mode 338, energy is 198.17856, rmsd is 43.719322
sib.fastconf.EADock3: Minimizing binding mode 339, energy is 198.32196, rmsd is 44.810783
sib.fastconf.EADock3: Minimizing binding mode 340, energy is 198.57541, rmsd is 12.188634
sib.fastconf.EADock3: Minimizing binding mode 341, energy is 198.7326, rmsd is 33.968502
sib.fastconf.EADock3: Minimizing binding mode 342, energy is 198.83427, rmsd is 12.115711
sib.fastconf.EADock3: Minimizing binding mode 343, energy is 198.95352, rmsd is 29.2466
sib.fastconf.EADock3: Minimizing binding mode 344, energy is 199.38928, rmsd is 33.407307
sib.fastconf.EADock3: Minimizing binding mode 345, energy is 199.39743, rmsd is 41.995945
sib.fastconf.EADock3: Minimizing binding mode 346, energy is 199.72961, rmsd is 37.786606
sib.fastconf.EADock3: Minimizing binding mode 347, energy is 199.7339, rmsd is 32.35437
sib.fastconf.EADock3: Minimizing binding mode 348, energy is 199.77876, rmsd is 31.539879
sib.fastconf.EADock3: Minimizing binding mode 349, energy is 200.03026, rmsd is 35.17115
sib.fastconf.EADock3: Minimizing binding mode 350, energy is 200.03552, rmsd is 35.7846
sib.fastconf.EADock3: Minimizing binding mode 351, energy is 200.36458, rmsd is 11.127586
sib.fastconf.EADock3: Minimizing binding mode 352, energy is 200.51141, rmsd is 42.637222
sib.fastconf.EADock3: Minimizing binding mode 353, energy is 200.55467, rmsd is 31.594011
sib.fastconf.EADock3: Minimizing binding mode 354, energy is 200.87437, rmsd is 2.395979
sib.fastconf.EADock3: Minimizing binding mode 355, energy is 201.01955, rmsd is 42.74858
sib.fastconf.EADock3: Minimizing binding mode 356, energy is 201.06345, rmsd is 3.016402
sib.fastconf.EADock3: Minimizing binding mode 357, energy is 201.09412, rmsd is 46.50354
sib.fastconf.EADock3: Minimizing binding mode 358, energy is 201.20241, rmsd is 45.86691
sib.fastconf.EADock3: Minimizing binding mode 359, energy is 201.24606, rmsd is 39.092865
sib.fastconf.EADock3: Minimizing binding mode 360, energy is 201.53917, rmsd is 38.428772
sib.fastconf.EADock3: Minimizing binding mode 361, energy is 202.51741, rmsd is 1.1764244
sib.fastconf.EADock3: Minimizing binding mode 362, energy is 202.52385, rmsd is 44.211086
sib.fastconf.EADock3: Minimizing binding mode 363, energy is 202.57356, rmsd is 66.130806
sib.fastconf.EADock3: Minimizing binding mode 364, energy is 202.5988, rmsd is 46.160942
sib.fastconf.EADock3: Minimizing binding mode 365, energy is 202.65143, rmsd is 43.91231
sib.fastconf.EADock3: Minimizing binding mode 366, energy is 202.75264, rmsd is 38.834038
sib.fastconf.EADock3: Minimizing binding mode 367, energy is 203.12398, rmsd is 44.603004
sib.fastconf.EADock3: Minimizing binding mode 368, energy is 203.51093, rmsd is 31.175644
sib.fastconf.EADock3: Minimizing binding mode 369, energy is 203.53424, rmsd is 65.34165
sib.fastconf.EADock3: Minimizing binding mode 370, energy is 203.75256, rmsd is 62.861763
sib.fastconf.EADock3: Minimizing binding mode 371, energy is 203.88681, rmsd is 45.644333
sib.fastconf.EADock3: Minimizing binding mode 372, energy is 204.11923, rmsd is 45.59864
sib.fastconf.EADock3: Minimizing binding mode 373, energy is 204.66542, rmsd is 38.800762
sib.fastconf.EADock3: Minimizing binding mode 374, energy is 204.95258, rmsd is 40.284412
sib.fastconf.EADock3: Minimizing binding mode 375, energy is 205.68192, rmsd is 34.35787
sib.fastconf.EADock3: Minimizing binding mode 376, energy is 205.84535, rmsd is 1.3723642
sib.fastconf.EADock3: Minimizing binding mode 377, energy is 205.89178, rmsd is 32.475883
sib.fastconf.EADock3: Minimizing binding mode 378, energy is 206.18893, rmsd is 2.4855573
sib.fastconf.EADock3: Minimizing binding mode 379, energy is 206.19519, rmsd is 3.0199065
sib.fastconf.EADock3: Minimizing binding mode 380, energy is 206.32394, rmsd is 63.836002
sib.fastconf.EADock3: Minimizing binding mode 381, energy is 206.7691, rmsd is 65.340416
sib.fastconf.EADock3: Minimizing binding mode 382, energy is 207.18137, rmsd is 65.90804
sib.fastconf.EADock3: Minimizing binding mode 383, energy is 207.48828, rmsd is 47.772953
sib.fastconf.EADock3: Minimizing binding mode 384, energy is 207.48935, rmsd is 66.55595
sib.fastconf.EADock3: Minimizing binding mode 385, energy is 207.89656, rmsd is 47.346992
sib.fastconf.EADock3: Minimizing binding mode 386, energy is 207.97234, rmsd is 66.081795
sib.fastconf.EADock3: Minimizing binding mode 387, energy is 208.12125, rmsd is 10.981231
sib.fastconf.EADock3: Minimizing binding mode 388, energy is 208.41206, rmsd is 65.60262
sib.fastconf.EADock3: Minimizing binding mode 389, energy is 208.58815, rmsd is 38.325447
sib.fastconf.EADock3: Minimizing binding mode 390, energy is 208.62364, rmsd is 43.012062
sib.fastconf.EADock3: Minimizing binding mode 391, energy is 208.74284, rmsd is 3.0892212
sib.fastconf.EADock3: Minimizing binding mode 392, energy is 208.86156, rmsd is 40.116085
sib.fastconf.EADock3: Minimizing binding mode 393, energy is 208.98203, rmsd is 45.101017
sib.fastconf.EADock3: Minimizing binding mode 394, energy is 209.25401, rmsd is 32.61217
sib.fastconf.EADock3: Minimizing binding mode 395, energy is 209.2565, rmsd is 34.994877
sib.fastconf.EADock3: Minimizing binding mode 396, energy is 209.28491, rmsd is 66.07822
sib.fastconf.EADock3: Minimizing binding mode 397, energy is 209.40036, rmsd is 32.59526
sib.fastconf.EADock3: Minimizing binding mode 398, energy is 209.49342, rmsd is 35.303173
sib.fastconf.EADock3: Minimizing binding mode 399, energy is 209.8419, rmsd is 48.22311
sib.fastconf.EADock3: Minimizing binding mode 400, energy is 209.99904, rmsd is 37.246807
sib.fastconf.EADock3: Minimizing binding mode 401, energy is 210.00555, rmsd is 1.3510679
sib.fastconf.EADock3: Minimizing binding mode 402, energy is 210.03198, rmsd is 39.966614
sib.fastconf.EADock3: Minimizing binding mode 403, energy is 210.24667, rmsd is 41.78065
sib.fastconf.EADock3: Minimizing binding mode 404, energy is 210.25197, rmsd is 40.395195
sib.fastconf.EADock3: Minimizing binding mode 405, energy is 210.27249, rmsd is 43.504974
sib.fastconf.EADock3: Minimizing binding mode 406, energy is 210.38806, rmsd is 64.9216
sib.fastconf.EADock3: Minimizing binding mode 407, energy is 210.64154, rmsd is 2.2740102
sib.fastconf.EADock3: Minimizing binding mode 408, energy is 210.79953, rmsd is 47.30308
sib.fastconf.EADock3: Minimizing binding mode 409, energy is 210.92743, rmsd is 43.030693
sib.fastconf.EADock3: Minimizing binding mode 410, energy is 211.10144, rmsd is 43.996525
sib.fastconf.EADock3: Minimizing binding mode 411, energy is 211.27051, rmsd is 32.058224
sib.fastconf.EADock3: Minimizing binding mode 412, energy is 211.28264, rmsd is 41.902504
sib.fastconf.EADock3: Minimizing binding mode 413, energy is 211.65584, rmsd is 35.1268
sib.fastconf.EADock3: Minimizing binding mode 414, energy is 211.75555, rmsd is 44.228386
sib.fastconf.EADock3: Minimizing binding mode 415, energy is 212.01433, rmsd is 42.145126
sib.fastconf.EADock3: Minimizing binding mode 416, energy is 212.05238, rmsd is 2.5875003
sib.fastconf.EADock3: Minimizing binding mode 417, energy is 212.57123, rmsd is 10.686725
sib.fastconf.EADock3: Minimizing binding mode 418, energy is 212.73141, rmsd is 36.35476
sib.fastconf.EADock3: Minimizing binding mode 419, energy is 212.74977, rmsd is 2.9188364
sib.fastconf.EADock3: Minimizing binding mode 420, energy is 212.75983, rmsd is 43.2592
sib.fastconf.EADock3: Minimizing binding mode 421, energy is 212.80392, rmsd is 37.745235
sib.fastconf.EADock3: Minimizing binding mode 422, energy is 212.85081, rmsd is 12.056197
sib.fastconf.EADock3: Minimizing binding mode 423, energy is 213.09064, rmsd is 45.77258
sib.fastconf.EADock3: Minimizing binding mode 424, energy is 213.32648, rmsd is 36.08161
sib.fastconf.EADock3: Minimizing binding mode 425, energy is 213.34753, rmsd is 36.5875
sib.fastconf.EADock3: Minimizing binding mode 426, energy is 213.3782, rmsd is 32.47178
sib.fastconf.EADock3: Minimizing binding mode 427, energy is 213.98837, rmsd is 11.936222
sib.fastconf.EADock3: Minimizing binding mode 428, energy is 214.02524, rmsd is 36.820885
sib.fastconf.EADock3: Minimizing binding mode 429, energy is 214.37294, rmsd is 46.620995
sib.fastconf.EADock3: Minimizing binding mode 430, energy is 214.43321, rmsd is 43.33017
sib.fastconf.EADock3: Minimizing binding mode 431, energy is 214.49336, rmsd is 29.473698
sib.fastconf.EADock3: Minimizing binding mode 432, energy is 214.7152, rmsd is 2.962691
sib.fastconf.EADock3: Minimizing binding mode 433, energy is 214.76071, rmsd is 31.761597
sib.fastconf.EADock3: Minimizing binding mode 434, energy is 214.97865, rmsd is 32.036858
sib.fastconf.EADock3: Minimizing binding mode 435, energy is 215.04436, rmsd is 33.55903
sib.fastconf.EADock3: Minimizing binding mode 436, energy is 215.43924, rmsd is 64.48412
sib.fastconf.EADock3: Minimizing binding mode 437, energy is 215.50705, rmsd is 44.24884
sib.fastconf.EADock3: Minimizing binding mode 438, energy is 215.53769, rmsd is 40.68575
sib.fastconf.EADock3: Minimizing binding mode 439, energy is 215.56569, rmsd is 47.60899
sib.fastconf.EADock3: Minimizing binding mode 440, energy is 216.4183, rmsd is 32.385807
sib.fastconf.EADock3: Minimizing binding mode 441, energy is 216.60765, rmsd is 68.26013
sib.fastconf.EADock3: Minimizing binding mode 442, energy is 216.6973, rmsd is 35.322685
sib.fastconf.EADock3: Minimizing binding mode 443, energy is 216.74817, rmsd is 45.984535
sib.fastconf.EADock3: Minimizing binding mode 444, energy is 216.75858, rmsd is 38.891926
sib.fastconf.EADock3: Minimizing binding mode 445, energy is 216.82643, rmsd is 33.284096
sib.fastconf.EADock3: Minimizing binding mode 446, energy is 216.95107, rmsd is 2.9942408
sib.fastconf.EADock3: Minimizing binding mode 447, energy is 216.99316, rmsd is 37.67167
sib.fastconf.EADock3: Minimizing binding mode 448, energy is 217.09856, rmsd is 37.508057
sib.fastconf.EADock3: Minimizing binding mode 449, energy is 217.21503, rmsd is 11.514441
sib.fastconf.EADock3: Minimizing binding mode 450, energy is 217.28282, rmsd is 44.5854
sib.fastconf.EADock3: Minimizing binding mode 451, energy is 217.5119, rmsd is 45.10374
sib.fastconf.EADock3: Minimizing binding mode 452, energy is 217.56775, rmsd is 55.785313
sib.fastconf.EADock3: Minimizing binding mode 453, energy is 217.65512, rmsd is 3.1530633
sib.fastconf.EADock3: Minimizing binding mode 454, energy is 217.78096, rmsd is 39.344532
sib.fastconf.EADock3: Minimizing binding mode 455, energy is 217.85025, rmsd is 41.28903
sib.fastconf.EADock3: Minimizing binding mode 456, energy is 217.8741, rmsd is 38.845108
sib.fastconf.EADock3: Minimizing binding mode 457, energy is 217.88829, rmsd is 2.3599591
sib.fastconf.EADock3: Minimizing binding mode 458, energy is 217.94398, rmsd is 45.991524
sib.fastconf.EADock3: Minimizing binding mode 459, energy is 217.97278, rmsd is 41.64387
sib.fastconf.EADock3: Minimizing binding mode 460, energy is 218.05336, rmsd is 47.008194
sib.fastconf.EADock3: Minimizing binding mode 461, energy is 218.14215, rmsd is 3.1730304
sib.fastconf.EADock3: Minimizing binding mode 462, energy is 218.64435, rmsd is 32.967697
sib.fastconf.EADock3: Minimizing binding mode 463, energy is 218.6543, rmsd is 30.664692
sib.fastconf.EADock3: Minimizing binding mode 464, energy is 218.90993, rmsd is 18.974194
sib.fastconf.EADock3: Minimizing binding mode 465, energy is 218.93002, rmsd is 44.750908
sib.fastconf.EADock3: Minimizing binding mode 466, energy is 218.98164, rmsd is 36.693554
sib.fastconf.EADock3: Minimizing binding mode 467, energy is 219.25642, rmsd is 65.75148
sib.fastconf.EADock3: Minimizing binding mode 468, energy is 219.56071, rmsd is 64.63153
sib.fastconf.EADock3: Minimizing binding mode 469, energy is 219.57336, rmsd is 32.71935
sib.fastconf.EADock3: Minimizing binding mode 470, energy is 219.9415, rmsd is 1.3384798
sib.fastconf.EADock3: Minimizing binding mode 471, energy is 219.95023, rmsd is 30.782131
sib.fastconf.EADock3: Minimizing binding mode 472, energy is 220.14455, rmsd is 42.64268
sib.fastconf.EADock3: Minimizing binding mode 473, energy is 220.18301, rmsd is 36.997192
sib.fastconf.EADock3: Minimizing binding mode 474, energy is 220.19133, rmsd is 56.147392
sib.fastconf.EADock3: Minimizing binding mode 475, energy is 220.29462, rmsd is 41.497135
sib.fastconf.EADock3: Minimizing binding mode 476, energy is 220.39093, rmsd is 43.9316
sib.fastconf.EADock3: Minimizing binding mode 477, energy is 220.60164, rmsd is 11.85675
sib.fastconf.EADock3: Minimizing binding mode 478, energy is 220.78201, rmsd is 42.94665
sib.fastconf.EADock3: Minimizing binding mode 479, energy is 220.88283, rmsd is 46.155342
sib.fastconf.EADock3: Minimizing binding mode 480, energy is 220.91246, rmsd is 38.477016
sib.fastconf.EADock3: Minimizing binding mode 481, energy is 221.06969, rmsd is 12.3127575
sib.fastconf.EADock3: Minimizing binding mode 482, energy is 221.11598, rmsd is 3.4453497
sib.fastconf.EADock3: Minimizing binding mode 483, energy is 221.14154, rmsd is 31.889254
sib.fastconf.EADock3: Minimizing binding mode 484, energy is 221.56888, rmsd is 39.5428
sib.fastconf.EADock3: Minimizing binding mode 485, energy is 221.5883, rmsd is 1.9068476
sib.fastconf.EADock3: Minimizing binding mode 486, energy is 221.84021, rmsd is 35.12987
sib.fastconf.EADock3: Minimizing binding mode 487, energy is 221.94531, rmsd is 1.6978034
sib.fastconf.EADock3: Minimizing binding mode 488, energy is 221.99904, rmsd is 28.292503
sib.fastconf.EADock3: Minimizing binding mode 489, energy is 222.51028, rmsd is 32.9173
sib.fastconf.EADock3: Minimizing binding mode 490, energy is 222.5492, rmsd is 33.46321
sib.fastconf.EADock3: Minimizing binding mode 491, energy is 222.66864, rmsd is 11.778286
sib.fastconf.EADock3: Minimizing binding mode 492, energy is 223.02194, rmsd is 37.07339
sib.fastconf.EADock3: Minimizing binding mode 493, energy is 223.03654, rmsd is 44.132275
sib.fastconf.EADock3: Minimizing binding mode 494, energy is 223.43614, rmsd is 32.05957
sib.fastconf.EADock3: Minimizing binding mode 495, energy is 223.53297, rmsd is 43.079376
sib.fastconf.EADock3: Minimizing binding mode 496, energy is 223.54707, rmsd is 2.207437
sib.fastconf.EADock3: Minimizing binding mode 497, energy is 223.56664, rmsd is 35.517914
sib.fastconf.EADock3: Minimizing binding mode 498, energy is 223.65395, rmsd is 44.458126
sib.fastconf.EADock3: Minimizing binding mode 499, energy is 223.69751, rmsd is 3.1540568
sib.fastconf.EADock3: Minimizing binding mode 500, energy is 224.4555, rmsd is 56.243164
sib.fastconf.EADock3: Minimizing binding mode 501, energy is 224.50531, rmsd is 33.773167
sib.fastconf.EADock3: Minimizing binding mode 502, energy is 224.7204, rmsd is 34.63845
sib.fastconf.EADock3: Minimizing binding mode 503, energy is 224.81587, rmsd is 3.2372909
sib.fastconf.EADock3: Minimizing binding mode 504, energy is 225.30383, rmsd is 44.694588
sib.fastconf.EADock3: Minimizing binding mode 505, energy is 225.30493, rmsd is 35.26058
sib.fastconf.EADock3: Minimizing binding mode 506, energy is 225.42432, rmsd is 43.152637
sib.fastconf.EADock3: Minimizing binding mode 507, energy is 225.53963, rmsd is 32.210434
sib.fastconf.EADock3: Minimizing binding mode 508, energy is 225.69748, rmsd is 42.911438
sib.fastconf.EADock3: Minimizing binding mode 509, energy is 225.84802, rmsd is 65.64631
sib.fastconf.EADock3: Minimizing binding mode 510, energy is 225.95251, rmsd is 33.650425
sib.fastconf.EADock3: Minimizing binding mode 511, energy is 226.06255, rmsd is 1.1443449
sib.fastconf.EADock3: Minimizing binding mode 512, energy is 226.21062, rmsd is 44.293728
sib.fastconf.EADock3: Minimizing binding mode 513, energy is 226.28891, rmsd is 3.3550172
sib.fastconf.EADock3: Minimizing binding mode 514, energy is 226.376, rmsd is 34.63482
sib.fastconf.EADock3: Minimizing binding mode 515, energy is 226.3803, rmsd is 41.125546
sib.fastconf.EADock3: Minimizing binding mode 516, energy is 227.68031, rmsd is 31.076656
sib.fastconf.EADock3: Minimizing binding mode 517, energy is 227.72438, rmsd is 1.7210532
sib.fastconf.EADock3: Minimizing binding mode 518, energy is 227.9481, rmsd is 30.983665
sib.fastconf.EADock3: Minimizing binding mode 519, energy is 227.96313, rmsd is 46.58131
sib.fastconf.EADock3: Minimizing binding mode 520, energy is 228.05902, rmsd is 37.233852
sib.fastconf.EADock3: Minimizing binding mode 521, energy is 228.40685, rmsd is 46.107693
sib.fastconf.EADock3: Minimizing binding mode 522, energy is 228.40826, rmsd is 36.529133
sib.fastconf.EADock3: Minimizing binding mode 523, energy is 228.51495, rmsd is 32.598255
sib.fastconf.EADock3: Minimizing binding mode 524, energy is 228.54144, rmsd is 2.8770175
sib.fastconf.EADock3: Minimizing binding mode 525, energy is 228.54874, rmsd is 36.452236
sib.fastconf.EADock3: Minimizing binding mode 526, energy is 228.55542, rmsd is 43.94421
sib.fastconf.EADock3: Minimizing binding mode 527, energy is 228.56465, rmsd is 65.72078
sib.fastconf.EADock3: Minimizing binding mode 528, energy is 228.7451, rmsd is 46.65746
sib.fastconf.EADock3: Minimizing binding mode 529, energy is 228.78934, rmsd is 3.2261384
sib.fastconf.EADock3: Minimizing binding mode 530, energy is 229.11705, rmsd is 32.728313
sib.fastconf.EADock3: Minimizing binding mode 531, energy is 229.13123, rmsd is 46.5607
sib.fastconf.EADock3: Minimizing binding mode 532, energy is 229.1388, rmsd is 47.162777
sib.fastconf.EADock3: Minimizing binding mode 533, energy is 229.1796, rmsd is 46.578922
sib.fastconf.EADock3: Minimizing binding mode 534, energy is 229.69986, rmsd is 31.409819
sib.fastconf.EADock3: Minimizing binding mode 535, energy is 229.7748, rmsd is 30.237865
sib.fastconf.EADock3: Minimizing binding mode 536, energy is 229.87717, rmsd is 43.691235
sib.fastconf.EADock3: Minimizing binding mode 537, energy is 229.9897, rmsd is 64.769196
sib.fastconf.EADock3: Minimizing binding mode 538, energy is 230.02023, rmsd is 53.464127
sib.fastconf.EADock3: Minimizing binding mode 539, energy is 230.10976, rmsd is 44.115807
sib.fastconf.EADock3: Minimizing binding mode 540, energy is 230.14357, rmsd is 34.32527
sib.fastconf.EADock3: Minimizing binding mode 541, energy is 230.35226, rmsd is 53.10242
sib.fastconf.EADock3: Minimizing binding mode 542, energy is 230.4044, rmsd is 66.921875
sib.fastconf.EADock3: Minimizing binding mode 543, energy is 230.47772, rmsd is 30.7695
sib.fastconf.EADock3: Minimizing binding mode 544, energy is 230.84196, rmsd is 30.0389
sib.fastconf.EADock3: Minimizing binding mode 545, energy is 231.15604, rmsd is 45.100582
sib.fastconf.EADock3: Minimizing binding mode 546, energy is 231.18565, rmsd is 64.88429
sib.fastconf.EADock3: Minimizing binding mode 547, energy is 231.2035, rmsd is 31.806547
sib.fastconf.EADock3: Minimizing binding mode 548, energy is 231.34523, rmsd is 3.2509105
sib.fastconf.EADock3: Minimizing binding mode 549, energy is 231.51573, rmsd is 44.15403
sib.fastconf.EADock3: Minimizing binding mode 550, energy is 231.8452, rmsd is 45.577324
sib.fastconf.EADock3: Minimizing binding mode 551, energy is 231.96393, rmsd is 44.362324
sib.fastconf.EADock3: Minimizing binding mode 552, energy is 232.48755, rmsd is 63.433216
sib.fastconf.EADock3: Minimizing binding mode 553, energy is 232.50117, rmsd is 45.22184
sib.fastconf.EADock3: Minimizing binding mode 554, energy is 232.73254, rmsd is 42.995346
sib.fastconf.EADock3: Minimizing binding mode 555, energy is 232.85898, rmsd is 32.369858
sib.fastconf.EADock3: Minimizing binding mode 556, energy is 232.97641, rmsd is 2.3899581
sib.fastconf.EADock3: Minimizing binding mode 557, energy is 233.10777, rmsd is 11.752355
sib.fastconf.EADock3: Minimizing binding mode 558, energy is 233.19922, rmsd is 46.56461
sib.fastconf.EADock3: Minimizing binding mode 559, energy is 233.26437, rmsd is 65.45197
sib.fastconf.EADock3: Minimizing binding mode 560, energy is 233.67712, rmsd is 1.9260497
sib.fastconf.EADock3: Minimizing binding mode 561, energy is 233.74342, rmsd is 10.96644
sib.fastconf.EADock3: Minimizing binding mode 562, energy is 233.91661, rmsd is 2.986921
sib.fastconf.EADock3: Minimizing binding mode 563, energy is 235.02782, rmsd is 47.951
sib.fastconf.EADock3: Minimizing binding mode 564, energy is 235.06366, rmsd is 44.237972
sib.fastconf.EADock3: Minimizing binding mode 565, energy is 235.36955, rmsd is 44.82563
sib.fastconf.EADock3: Minimizing binding mode 566, energy is 235.43044, rmsd is 1.0710247
sib.fastconf.EADock3: Minimizing binding mode 567, energy is 235.48895, rmsd is 3.3749468
sib.fastconf.EADock3: Minimizing binding mode 568, energy is 235.61107, rmsd is 2.9977422
sib.fastconf.EADock3: Minimizing binding mode 569, energy is 235.62018, rmsd is 31.925644
sib.fastconf.EADock3: Minimizing binding mode 570, energy is 235.65852, rmsd is 36.304367
sib.fastconf.EADock3: Minimizing binding mode 571, energy is 235.92604, rmsd is 67.81785
sib.fastconf.EADock3: Minimizing binding mode 572, energy is 236.02707, rmsd is 31.08301
sib.fastconf.EADock3: Minimizing binding mode 573, energy is 236.36734, rmsd is 3.4194527
sib.fastconf.EADock3: Minimizing binding mode 574, energy is 236.60913, rmsd is 30.283127
sib.fastconf.EADock3: Minimizing binding mode 575, energy is 236.73065, rmsd is 36.92597
sib.fastconf.EADock3: Minimizing binding mode 576, energy is 237.23889, rmsd is 33.58861
sib.fastconf.EADock3: Minimizing binding mode 577, energy is 237.45607, rmsd is 36.515316
sib.fastconf.EADock3: Minimizing binding mode 578, energy is 237.54247, rmsd is 39.4069
sib.fastconf.EADock3: Minimizing binding mode 579, energy is 237.72028, rmsd is 43.220406
sib.fastconf.EADock3: Minimizing binding mode 580, energy is 237.76093, rmsd is 33.628506
sib.fastconf.EADock3: Minimizing binding mode 581, energy is 238.57051, rmsd is 30.702515
sib.fastconf.EADock3: Minimizing binding mode 582, energy is 238.70862, rmsd is 2.3587668
sib.fastconf.EADock3: Minimizing binding mode 583, energy is 238.81847, rmsd is 2.144246
sib.fastconf.EADock3: Minimizing binding mode 584, energy is 238.99371, rmsd is 1.9897989
sib.fastconf.EADock3: Minimizing binding mode 585, energy is 239.01305, rmsd is 65.804756
sib.fastconf.EADock3: Minimizing binding mode 586, energy is 239.03503, rmsd is 36.330647
sib.fastconf.EADock3: Minimizing binding mode 587, energy is 239.35577, rmsd is 65.26998
sib.fastconf.EADock3: Minimizing binding mode 588, energy is 239.55135, rmsd is 11.324097
sib.fastconf.EADock3: Minimizing binding mode 589, energy is 239.63982, rmsd is 31.583431
sib.fastconf.EADock3: Minimizing binding mode 590, energy is 239.91237, rmsd is 33.850544
sib.fastconf.EADock3: Minimizing binding mode 591, energy is 240.20291, rmsd is 32.612453
sib.fastconf.EADock3: Minimizing binding mode 592, energy is 240.30757, rmsd is 36.737057
sib.fastconf.EADock3: Minimizing binding mode 593, energy is 240.57564, rmsd is 3.1356006
sib.fastconf.EADock3: Minimizing binding mode 594, energy is 240.74991, rmsd is 43.53744
sib.fastconf.EADock3: Minimizing binding mode 595, energy is 240.80356, rmsd is 35.41881
sib.fastconf.EADock3: Minimizing binding mode 596, energy is 240.98518, rmsd is 44.86819
sib.fastconf.EADock3: Minimizing binding mode 597, energy is 241.11726, rmsd is 35.630066
sib.fastconf.EADock3: Minimizing binding mode 598, energy is 241.20874, rmsd is 2.109789
sib.fastconf.EADock3: Minimizing binding mode 599, energy is 241.3123, rmsd is 46.498028
sib.fastconf.EADock3: Minimizing binding mode 600, energy is 241.39369, rmsd is 66.09228
sib.fastconf.EADock3: Minimizing binding mode 601, energy is 241.40091, rmsd is 32.626427
sib.fastconf.EADock3: Minimizing binding mode 602, energy is 241.53595, rmsd is 3.6677086
sib.fastconf.EADock3: Minimizing binding mode 603, energy is 241.55795, rmsd is 35.879486
sib.fastconf.EADock3: Minimizing binding mode 604, energy is 241.75273, rmsd is 64.9317
sib.fastconf.EADock3: Minimizing binding mode 605, energy is 242.11429, rmsd is 29.864233
sib.fastconf.EADock3: Minimizing binding mode 606, energy is 242.12119, rmsd is 44.4952
sib.fastconf.EADock3: Minimizing binding mode 607, energy is 242.64095, rmsd is 42.17981
sib.fastconf.EADock3: Minimizing binding mode 608, energy is 242.8263, rmsd is 46.926632
sib.fastconf.EADock3: Minimizing binding mode 609, energy is 243.27295, rmsd is 34.797047
sib.fastconf.EADock3: Minimizing binding mode 610, energy is 243.6716, rmsd is 65.64838
sib.fastconf.EADock3: Minimizing binding mode 611, energy is 243.81778, rmsd is 2.4959412
sib.fastconf.EADock3: Minimizing binding mode 612, energy is 244.07846, rmsd is 45.237885
sib.fastconf.EADock3: Minimizing binding mode 613, energy is 244.19342, rmsd is 32.92689
sib.fastconf.EADock3: Minimizing binding mode 614, energy is 244.20099, rmsd is 29.892729
sib.fastconf.EADock3: Minimizing binding mode 615, energy is 244.32431, rmsd is 43.95779
sib.fastconf.EADock3: Minimizing binding mode 616, energy is 244.59476, rmsd is 32.431866
sib.fastconf.EADock3: Minimizing binding mode 617, energy is 244.71458, rmsd is 9.384942
sib.fastconf.EADock3: Minimizing binding mode 618, energy is 245.16115, rmsd is 32.611797
sib.fastconf.EADock3: Minimizing binding mode 619, energy is 245.1727, rmsd is 31.765118
sib.fastconf.EADock3: Minimizing binding mode 620, energy is 245.36595, rmsd is 44.944817
sib.fastconf.EADock3: Minimizing binding mode 621, energy is 245.6957, rmsd is 65.37667
sib.fastconf.EADock3: Minimizing binding mode 622, energy is 245.9248, rmsd is 42.8813
sib.fastconf.EADock3: Minimizing binding mode 623, energy is 246.23618, rmsd is 45.88808
sib.fastconf.EADock3: Minimizing binding mode 624, energy is 246.48817, rmsd is 11.736648
sib.fastconf.EADock3: Minimizing binding mode 625, energy is 246.52644, rmsd is 40.51972
sib.fastconf.EADock3: Minimizing binding mode 626, energy is 246.61292, rmsd is 1.2683594
sib.fastconf.EADock3: Minimizing binding mode 627, energy is 246.6962, rmsd is 1.6557287
sib.fastconf.EADock3: Minimizing binding mode 628, energy is 247.34448, rmsd is 44.652756
sib.fastconf.EADock3: Minimizing binding mode 629, energy is 247.48145, rmsd is 1.8098706
sib.fastconf.EADock3: Minimizing binding mode 630, energy is 247.49579, rmsd is 65.36358
sib.fastconf.EADock3: Minimizing binding mode 631, energy is 247.5173, rmsd is 44.521572
sib.fastconf.EADock3: Minimizing binding mode 632, energy is 247.63579, rmsd is 34.855965
sib.fastconf.EADock3: Minimizing binding mode 633, energy is 247.66158, rmsd is 1.5601372
sib.fastconf.EADock3: Minimizing binding mode 634, energy is 247.72362, rmsd is 3.1700146
sib.fastconf.EADock3: Minimizing binding mode 635, energy is 247.78745, rmsd is 46.09062
sib.fastconf.EADock3: Minimizing binding mode 636, energy is 247.88872, rmsd is 31.590864
sib.fastconf.EADock3: Minimizing binding mode 637, energy is 247.91568, rmsd is 44.86843
sib.fastconf.EADock3: Minimizing binding mode 638, energy is 247.92917, rmsd is 41.63687
sib.fastconf.EADock3: Minimizing binding mode 639, energy is 247.95409, rmsd is 38.93814
sib.fastconf.EADock3: Minimizing binding mode 640, energy is 247.96098, rmsd is 44.509434
sib.fastconf.EADock3: Minimizing binding mode 641, energy is 248.02797, rmsd is 31.354832
sib.fastconf.EADock3: Minimizing binding mode 642, energy is 248.7655, rmsd is 46.008636
sib.fastconf.EADock3: Minimizing binding mode 643, energy is 248.83124, rmsd is 44.40661
sib.fastconf.EADock3: Minimizing binding mode 644, energy is 249.0442, rmsd is 43.625465
sib.fastconf.EADock3: Minimizing binding mode 645, energy is 249.05779, rmsd is 34.03771
sib.fastconf.EADock3: Minimizing binding mode 646, energy is 249.17303, rmsd is 45.77897
sib.fastconf.EADock3: Minimizing binding mode 647, energy is 249.4556, rmsd is 66.569115
sib.fastconf.EADock3: Minimizing binding mode 648, energy is 249.52562, rmsd is 38.970474
sib.fastconf.EADock3: Minimizing binding mode 649, energy is 249.72035, rmsd is 2.457399
sib.fastconf.EADock3: Minimizing binding mode 650, energy is 250.03743, rmsd is 55.107494
sib.fastconf.EADock3: Minimizing binding mode 651, energy is 250.07501, rmsd is 40.557217
sib.fastconf.EADock3: Minimizing binding mode 652, energy is 250.10521, rmsd is 12.183758
sib.fastconf.EADock3: Minimizing binding mode 653, energy is 250.51862, rmsd is 11.29976
sib.fastconf.EADock3: Minimizing binding mode 654, energy is 250.79271, rmsd is 34.80648
sib.fastconf.EADock3: Minimizing binding mode 655, energy is 250.98367, rmsd is 42.576996
sib.fastconf.EADock3: Minimizing binding mode 656, energy is 251.05812, rmsd is 35.108337
sib.fastconf.EADock3: Minimizing binding mode 657, energy is 251.1168, rmsd is 11.607773
sib.fastconf.EADock3: Minimizing binding mode 658, energy is 251.14262, rmsd is 28.937075
sib.fastconf.EADock3: Minimizing binding mode 659, energy is 251.26686, rmsd is 40.172646
sib.fastconf.EADock3: Minimizing binding mode 660, energy is 251.35072, rmsd is 35.910595
sib.fastconf.EADock3: Minimizing binding mode 661, energy is 251.43037, rmsd is 36.04701
sib.fastconf.EADock3: Minimizing binding mode 662, energy is 251.51042, rmsd is 1.5156783
sib.fastconf.EADock3: Minimizing binding mode 663, energy is 251.7425, rmsd is 33.865265
sib.fastconf.EADock3: Minimizing binding mode 664, energy is 251.82262, rmsd is 55.057972
sib.fastconf.EADock3: Minimizing binding mode 665, energy is 251.96559, rmsd is 44.234188
sib.fastconf.EADock3: Minimizing binding mode 666, energy is 252.01254, rmsd is 12.666938
sib.fastconf.EADock3: Minimizing binding mode 667, energy is 252.19254, rmsd is 2.9056203
sib.fastconf.EADock3: Minimizing binding mode 668, energy is 252.26593, rmsd is 37.398697
sib.fastconf.EADock3: Minimizing binding mode 669, energy is 252.28839, rmsd is 43.381947
sib.fastconf.EADock3: Minimizing binding mode 670, energy is 252.78714, rmsd is 33.819
sib.fastconf.EADock3: Minimizing binding mode 671, energy is 252.80817, rmsd is 36.470917
sib.fastconf.EADock3: Minimizing binding mode 672, energy is 252.84584, rmsd is 3.4143388
sib.fastconf.EADock3: Minimizing binding mode 673, energy is 253.00085, rmsd is 31.125364
sib.fastconf.EADock3: Minimizing binding mode 674, energy is 253.00304, rmsd is 65.105736
sib.fastconf.EADock3: Minimizing binding mode 675, energy is 253.06424, rmsd is 29.963955
sib.fastconf.EADock3: Minimizing binding mode 676, energy is 253.17438, rmsd is 30.323328
sib.fastconf.EADock3: Minimizing binding mode 677, energy is 253.41348, rmsd is 43.299545
sib.fastconf.EADock3: Minimizing binding mode 678, energy is 253.45741, rmsd is 32.23814
sib.fastconf.EADock3: Minimizing binding mode 679, energy is 253.52023, rmsd is 1.5303812
sib.fastconf.EADock3: Minimizing binding mode 680, energy is 253.54646, rmsd is 46.191586
sib.fastconf.EADock3: Minimizing binding mode 681, energy is 253.83855, rmsd is 46.9477
sib.fastconf.EADock3: Minimizing binding mode 682, energy is 253.96643, rmsd is 45.515263
sib.fastconf.EADock3: Minimizing binding mode 683, energy is 254.00766, rmsd is 40.543396
sib.fastconf.EADock3: Minimizing binding mode 684, energy is 254.16089, rmsd is 3.4673998
sib.fastconf.EADock3: Minimizing binding mode 685, energy is 254.36942, rmsd is 36.640396
sib.fastconf.EADock3: Minimizing binding mode 686, energy is 254.4072, rmsd is 35.021935
sib.fastconf.EADock3: Minimizing binding mode 687, energy is 254.67426, rmsd is 32.565384
sib.fastconf.EADock3: Minimizing binding mode 688, energy is 254.92201, rmsd is 67.28769
sib.fastconf.EADock3: Minimizing binding mode 689, energy is 254.94539, rmsd is 71.077705
sib.fastconf.EADock3: Minimizing binding mode 690, energy is 255.11327, rmsd is 36.190838
sib.fastconf.EADock3: Minimizing binding mode 691, energy is 255.22896, rmsd is 66.86124
sib.fastconf.EADock3: Minimizing binding mode 692, energy is 255.31946, rmsd is 31.499668
sib.fastconf.EADock3: Minimizing binding mode 693, energy is 255.36087, rmsd is 47.261288
sib.fastconf.EADock3: Minimizing binding mode 694, energy is 255.54388, rmsd is 11.659598
sib.fastconf.EADock3: Minimizing binding mode 695, energy is 255.71527, rmsd is 45.740696
sib.fastconf.EADock3: Minimizing binding mode 696, energy is 255.75735, rmsd is 11.609173
sib.fastconf.EADock3: Minimizing binding mode 697, energy is 255.87802, rmsd is 32.03556
sib.fastconf.EADock3: Minimizing binding mode 698, energy is 255.93939, rmsd is 41.63623
sib.fastconf.EADock3: Minimizing binding mode 699, energy is 255.96922, rmsd is 31.074398
sib.fastconf.EADock3: Minimizing binding mode 700, energy is 255.97095, rmsd is 46.55975
sib.fastconf.EADock3: Minimizing binding mode 701, energy is 256.1604, rmsd is 33.477657
sib.fastconf.EADock3: Minimizing binding mode 702, energy is 256.29068, rmsd is 42.969448
sib.fastconf.EADock3: Minimizing binding mode 703, energy is 256.4151, rmsd is 2.3716583
sib.fastconf.EADock3: Minimizing binding mode 704, energy is 256.51382, rmsd is 41.02622
sib.fastconf.EADock3: Minimizing binding mode 705, energy is 256.6122, rmsd is 32.01577
sib.fastconf.EADock3: Minimizing binding mode 706, energy is 256.67978, rmsd is 65.45118
sib.fastconf.EADock3: Minimizing binding mode 707, energy is 256.7829, rmsd is 36.70693
sib.fastconf.EADock3: Minimizing binding mode 708, energy is 256.94968, rmsd is 31.187061
sib.fastconf.EADock3: Minimizing binding mode 709, energy is 257.7479, rmsd is 32.022465
sib.fastconf.EADock3: Minimizing binding mode 710, energy is 258.1311, rmsd is 39.147472
sib.fastconf.EADock3: Minimizing binding mode 711, energy is 258.205, rmsd is 65.508965
sib.fastconf.EADock3: Minimizing binding mode 712, energy is 258.2904, rmsd is 47.083817
sib.fastconf.EADock3: Minimizing binding mode 713, energy is 258.35544, rmsd is 35.125763
sib.fastconf.EADock3: Minimizing binding mode 714, energy is 258.36935, rmsd is 11.941912
sib.fastconf.EADock3: Minimizing binding mode 715, energy is 258.4766, rmsd is 43.698498
sib.fastconf.EADock3: Minimizing binding mode 716, energy is 258.5987, rmsd is 65.47645
sib.fastconf.EADock3: Minimizing binding mode 717, energy is 258.68765, rmsd is 38.7942
sib.fastconf.EADock3: Minimizing binding mode 718, energy is 258.8872, rmsd is 2.6833498
sib.fastconf.EADock3: Minimizing binding mode 719, energy is 259.2309, rmsd is 42.970425
sib.fastconf.EADock3: Minimizing binding mode 720, energy is 259.49875, rmsd is 2.750463
sib.fastconf.EADock3: Minimizing binding mode 721, energy is 259.5553, rmsd is 31.420845
sib.fastconf.EADock3: Minimizing binding mode 722, energy is 259.6457, rmsd is 35.68977
sib.fastconf.EADock3: Minimizing binding mode 723, energy is 259.67044, rmsd is 2.7936354
sib.fastconf.EADock3: Minimizing binding mode 724, energy is 259.794, rmsd is 44.97753
sib.fastconf.EADock3: Minimizing binding mode 725, energy is 260.10684, rmsd is 35.809475
sib.fastconf.EADock3: Minimizing binding mode 726, energy is 260.23175, rmsd is 30.510418
sib.fastconf.EADock3: Minimizing binding mode 727, energy is 260.8265, rmsd is 30.058115
sib.fastconf.EADock3: Minimizing binding mode 728, energy is 261.31235, rmsd is 46.581333
sib.fastconf.EADock3: Minimizing binding mode 729, energy is 261.906, rmsd is 36.711857
sib.fastconf.EADock3: Minimizing binding mode 730, energy is 261.981, rmsd is 3.1133916
sib.fastconf.EADock3: Minimizing binding mode 731, energy is 262.49384, rmsd is 2.5951362
sib.fastconf.EADock3: Minimizing binding mode 732, energy is 262.50134, rmsd is 1.9905568
sib.fastconf.EADock3: Minimizing binding mode 733, energy is 262.685, rmsd is 65.14036
sib.fastconf.EADock3: Minimizing binding mode 734, energy is 263.19714, rmsd is 29.799345
sib.fastconf.EADock3: Minimizing binding mode 735, energy is 263.2931, rmsd is 45.02546
sib.fastconf.EADock3: Minimizing binding mode 736, energy is 263.48602, rmsd is 30.397186
sib.fastconf.EADock3: Minimizing binding mode 737, energy is 263.59506, rmsd is 64.16416
sib.fastconf.EADock3: Minimizing binding mode 738, energy is 263.81174, rmsd is 2.6157475
sib.fastconf.EADock3: Minimizing binding mode 739, energy is 264.07092, rmsd is 45.13173
sib.fastconf.EADock3: Minimizing binding mode 740, energy is 264.92606, rmsd is 43.298676
sib.fastconf.EADock3: Minimizing binding mode 741, energy is 264.9601, rmsd is 32.75771
sib.fastconf.EADock3: Minimizing binding mode 742, energy is 265.3652, rmsd is 37.36279
sib.fastconf.EADock3: Minimizing binding mode 743, energy is 265.62723, rmsd is 28.499767
sib.fastconf.EADock3: Minimizing binding mode 744, energy is 266.13977, rmsd is 35.477833
sib.fastconf.EADock3: Minimizing binding mode 745, energy is 266.16333, rmsd is 12.908823
sib.fastconf.EADock3: Minimizing binding mode 746, energy is 266.2599, rmsd is 41.416424
sib.fastconf.EADock3: Minimizing binding mode 747, energy is 266.6903, rmsd is 29.87919
sib.fastconf.EADock3: Minimizing binding mode 748, energy is 266.727, rmsd is 40.57544
sib.fastconf.EADock3: Minimizing binding mode 749, energy is 266.83887, rmsd is 2.2136798
sib.fastconf.EADock3: Minimizing binding mode 750, energy is 266.9365, rmsd is 44.589275
sib.fastconf.EADock3: Minimizing binding mode 751, energy is 267.27924, rmsd is 42.8415
sib.fastconf.EADock3: Minimizing binding mode 752, energy is 267.34412, rmsd is 33.065216
sib.fastconf.EADock3: Minimizing binding mode 753, energy is 267.45782, rmsd is 34.837147
sib.fastconf.EADock3: Minimizing binding mode 754, energy is 267.46643, rmsd is 11.822875
sib.fastconf.EADock3: Minimizing binding mode 755, energy is 267.5149, rmsd is 26.406239
sib.fastconf.EADock3: Minimizing binding mode 756, energy is 267.59305, rmsd is 30.455162
sib.fastconf.EADock3: Minimizing binding mode 757, energy is 267.62698, rmsd is 42.871975
sib.fastconf.EADock3: Minimizing binding mode 758, energy is 267.74075, rmsd is 42.04042
sib.fastconf.EADock3: Minimizing binding mode 759, energy is 267.98618, rmsd is 43.68119
sib.fastconf.EADock3: Minimizing binding mode 760, energy is 268.61087, rmsd is 3.1964078
sib.fastconf.EADock3: Minimizing binding mode 761, energy is 268.82504, rmsd is 43.722267
sib.fastconf.EADock3: Minimizing binding mode 762, energy is 268.88593, rmsd is 1.5619107
sib.fastconf.EADock3: Minimizing binding mode 763, energy is 269.129, rmsd is 42.547073
sib.fastconf.EADock3: Minimizing binding mode 764, energy is 269.16586, rmsd is 30.0789
sib.fastconf.EADock3: Minimizing binding mode 765, energy is 269.23724, rmsd is 32.657085
sib.fastconf.EADock3: Minimizing binding mode 766, energy is 269.44052, rmsd is 29.54346
sib.fastconf.EADock3: Minimizing binding mode 767, energy is 269.44067, rmsd is 1.9403627
sib.fastconf.EADock3: Minimizing binding mode 768, energy is 269.51953, rmsd is 41.771027
sib.fastconf.EADock3: Minimizing binding mode 769, energy is 269.52585, rmsd is 37.194523
sib.fastconf.EADock3: Minimizing binding mode 770, energy is 269.62268, rmsd is 40.412636
sib.fastconf.EADock3: Minimizing binding mode 771, energy is 269.7106, rmsd is 30.078135
sib.fastconf.EADock3: Minimizing binding mode 772, energy is 269.7407, rmsd is 2.0544543
sib.fastconf.EADock3: Minimizing binding mode 773, energy is 270.09314, rmsd is 45.752613
sib.fastconf.EADock3: Minimizing binding mode 774, energy is 270.24725, rmsd is 34.28855
sib.fastconf.EADock3: Minimizing binding mode 775, energy is 270.27472, rmsd is 45.274914
sib.fastconf.EADock3: Minimizing binding mode 776, energy is 270.37366, rmsd is 41.253006
sib.fastconf.EADock3: Minimizing binding mode 777, energy is 270.4351, rmsd is 37.063625
sib.fastconf.EADock3: Minimizing binding mode 778, energy is 270.62283, rmsd is 47.605022
sib.fastconf.EADock3: Minimizing binding mode 779, energy is 270.70334, rmsd is 32.704304
sib.fastconf.EADock3: Minimizing binding mode 780, energy is 270.79727, rmsd is 34.46001
sib.fastconf.EADock3: Minimizing binding mode 781, energy is 271.93185, rmsd is 30.857481
sib.fastconf.EADock3: Minimizing binding mode 782, energy is 272.0804, rmsd is 12.2621155
sib.fastconf.EADock3: Minimizing binding mode 783, energy is 272.53177, rmsd is 46.10526
sib.fastconf.EADock3: Minimizing binding mode 784, energy is 272.61707, rmsd is 47.54521
sib.fastconf.EADock3: Minimizing binding mode 785, energy is 272.86276, rmsd is 66.379135
sib.fastconf.EADock3: Minimizing binding mode 786, energy is 273.19672, rmsd is 3.3007624
sib.fastconf.EADock3: Minimizing binding mode 787, energy is 273.3244, rmsd is 45.525787
sib.fastconf.EADock3: Minimizing binding mode 788, energy is 273.40912, rmsd is 12.56077
sib.fastconf.EADock3: Minimizing binding mode 789, energy is 273.58582, rmsd is 37.284817
sib.fastconf.EADock3: Minimizing binding mode 790, energy is 273.9545, rmsd is 43.100258
sib.fastconf.EADock3: Minimizing binding mode 791, energy is 274.19833, rmsd is 37.45092
sib.fastconf.EADock3: Minimizing binding mode 792, energy is 274.24875, rmsd is 31.24381
sib.fastconf.EADock3: Minimizing binding mode 793, energy is 274.40222, rmsd is 64.64449
sib.fastconf.EADock3: Minimizing binding mode 794, energy is 275.34155, rmsd is 30.291752
sib.fastconf.EADock3: Minimizing binding mode 795, energy is 275.73, rmsd is 33.40463
sib.fastconf.EADock3: Minimizing binding mode 796, energy is 275.78992, rmsd is 37.240234
sib.fastconf.EADock3: Minimizing binding mode 797, energy is 275.89975, rmsd is 46.568687
sib.fastconf.EADock3: Minimizing binding mode 798, energy is 275.93494, rmsd is 43.40256
sib.fastconf.EADock3: Minimizing binding mode 799, energy is 276.44864, rmsd is 31.799545
sib.fastconf.EADock3: Minimizing binding mode 800, energy is 276.50162, rmsd is 11.300973
sib.fastconf.EADock3: Minimizing binding mode 801, energy is 276.705, rmsd is 43.885384
sib.fastconf.EADock3: Minimizing binding mode 802, energy is 276.8823, rmsd is 46.479473
sib.fastconf.EADock3: Minimizing binding mode 803, energy is 276.88245, rmsd is 46.50902
sib.fastconf.EADock3: Minimizing binding mode 804, energy is 277.00836, rmsd is 31.100695
sib.fastconf.EADock3: Minimizing binding mode 805, energy is 277.54617, rmsd is 2.7321274
sib.fastconf.EADock3: Minimizing binding mode 806, energy is 277.63144, rmsd is 43.533867
sib.fastconf.EADock3: Minimizing binding mode 807, energy is 277.71564, rmsd is 43.756107
sib.fastconf.EADock3: Minimizing binding mode 808, energy is 277.8868, rmsd is 30.235693
sib.fastconf.EADock3: Minimizing binding mode 809, energy is 278.15402, rmsd is 40.23152
sib.fastconf.EADock3: Minimizing binding mode 810, energy is 278.29993, rmsd is 42.11404
sib.fastconf.EADock3: Minimizing binding mode 811, energy is 278.3388, rmsd is 3.1668084
sib.fastconf.EADock3: Minimizing binding mode 812, energy is 278.3451, rmsd is 46.348274
sib.fastconf.EADock3: Minimizing binding mode 813, energy is 278.9205, rmsd is 35.93085
sib.fastconf.EADock3: Minimizing binding mode 814, energy is 279.03345, rmsd is 11.709575
sib.fastconf.EADock3: Minimizing binding mode 815, energy is 279.05627, rmsd is 45.196396
sib.fastconf.EADock3: Minimizing binding mode 816, energy is 279.3403, rmsd is 2.6554742
sib.fastconf.EADock3: Minimizing binding mode 817, energy is 279.3476, rmsd is 2.8679743
sib.fastconf.EADock3: Minimizing binding mode 818, energy is 279.76096, rmsd is 32.284595
sib.fastconf.EADock3: Minimizing binding mode 819, energy is 280.02667, rmsd is 41.808155
sib.fastconf.EADock3: Minimizing binding mode 820, energy is 280.1809, rmsd is 65.08663
sib.fastconf.EADock3: Minimizing binding mode 821, energy is 280.42294, rmsd is 42.258667
sib.fastconf.EADock3: Minimizing binding mode 822, energy is 280.51572, rmsd is 1.6865783
sib.fastconf.EADock3: Minimizing binding mode 823, energy is 280.8957, rmsd is 45.5285
sib.fastconf.EADock3: Minimizing binding mode 824, energy is 281.43463, rmsd is 39.467434
sib.fastconf.EADock3: Minimizing binding mode 825, energy is 281.57547, rmsd is 42.79944
sib.fastconf.EADock3: Minimizing binding mode 826, energy is 281.92358, rmsd is 2.3218882
sib.fastconf.EADock3: Minimizing binding mode 827, energy is 281.96417, rmsd is 34.32388
sib.fastconf.EADock3: Minimizing binding mode 828, energy is 282.14792, rmsd is 34.51672
sib.fastconf.EADock3: Minimizing binding mode 829, energy is 282.16403, rmsd is 37.19607
sib.fastconf.EADock3: Minimizing binding mode 830, energy is 282.16446, rmsd is 46.340683
sib.fastconf.EADock3: Minimizing binding mode 831, energy is 282.47754, rmsd is 44.772285
sib.fastconf.EADock3: Minimizing binding mode 832, energy is 282.53888, rmsd is 35.092598
sib.fastconf.EADock3: Minimizing binding mode 833, energy is 282.88638, rmsd is 48.30047
sib.fastconf.EADock3: Minimizing binding mode 834, energy is 282.91632, rmsd is 31.397186
sib.fastconf.EADock3: Minimizing binding mode 835, energy is 283.1697, rmsd is 64.29578
sib.fastconf.EADock3: Minimizing binding mode 836, energy is 283.1743, rmsd is 45.630196
sib.fastconf.EADock3: Minimizing binding mode 837, energy is 283.32803, rmsd is 35.69594
sib.fastconf.EADock3: Minimizing binding mode 838, energy is 283.80435, rmsd is 29.847393
sib.fastconf.EADock3: Minimizing binding mode 839, energy is 284.1966, rmsd is 65.22635
sib.fastconf.EADock3: Minimizing binding mode 840, energy is 284.20258, rmsd is 39.24464
sib.fastconf.EADock3: Minimizing binding mode 841, energy is 284.40012, rmsd is 33.073067
sib.fastconf.EADock3: Minimizing binding mode 842, energy is 284.5386, rmsd is 1.2287015
sib.fastconf.EADock3: Minimizing binding mode 843, energy is 284.5731, rmsd is 42.95858
sib.fastconf.EADock3: Minimizing binding mode 844, energy is 284.60892, rmsd is 37.549923
sib.fastconf.EADock3: Minimizing binding mode 845, energy is 284.72717, rmsd is 43.52503
sib.fastconf.EADock3: Minimizing binding mode 846, energy is 285.03287, rmsd is 1.8102862
sib.fastconf.EADock3: Minimizing binding mode 847, energy is 285.25903, rmsd is 11.8357
sib.fastconf.EADock3: Minimizing binding mode 848, energy is 285.29193, rmsd is 12.14782
sib.fastconf.EADock3: Minimizing binding mode 849, energy is 285.65146, rmsd is 36.175026
sib.fastconf.EADock3: Minimizing binding mode 850, energy is 285.67657, rmsd is 2.5531416
sib.fastconf.EADock3: Minimizing binding mode 851, energy is 285.74628, rmsd is 30.73864
sib.fastconf.EADock3: Minimizing binding mode 852, energy is 285.81244, rmsd is 10.150537
sib.fastconf.EADock3: Minimizing binding mode 853, energy is 285.91168, rmsd is 3.0342746
sib.fastconf.EADock3: Minimizing binding mode 854, energy is 286.08377, rmsd is 34.173264
sib.fastconf.EADock3: Minimizing binding mode 855, energy is 286.15237, rmsd is 2.099574
sib.fastconf.EADock3: Minimizing binding mode 856, energy is 286.59924, rmsd is 32.265434
sib.fastconf.EADock3: Minimizing binding mode 857, energy is 287.0442, rmsd is 10.740701
sib.fastconf.EADock3: Minimizing binding mode 858, energy is 287.17398, rmsd is 44.018738
sib.fastconf.EADock3: Minimizing binding mode 859, energy is 287.3578, rmsd is 29.768173
sib.fastconf.EADock3: Minimizing binding mode 860, energy is 287.47568, rmsd is 12.81399
sib.fastconf.EADock3: Minimizing binding mode 861, energy is 287.56586, rmsd is 30.481106
sib.fastconf.EADock3: Minimizing binding mode 862, energy is 287.62186, rmsd is 2.731591
sib.fastconf.EADock3: Minimizing binding mode 863, energy is 287.78625, rmsd is 44.174057
sib.fastconf.EADock3: Minimizing binding mode 864, energy is 288.15305, rmsd is 46.156326
sib.fastconf.EADock3: Minimizing binding mode 865, energy is 288.4726, rmsd is 2.8083034
sib.fastconf.EADock3: Minimizing binding mode 866, energy is 289.32333, rmsd is 43.3336
sib.fastconf.EADock3: Minimizing binding mode 867, energy is 289.69504, rmsd is 31.811975
sib.fastconf.EADock3: Minimizing binding mode 868, energy is 289.8337, rmsd is 44.846622
sib.fastconf.EADock3: Minimizing binding mode 869, energy is 290.40933, rmsd is 30.64709
sib.fastconf.EADock3: Minimizing binding mode 870, energy is 290.71234, rmsd is 41.254505
sib.fastconf.EADock3: Minimizing binding mode 871, energy is 290.96704, rmsd is 46.003002
sib.fastconf.EADock3: Minimizing binding mode 872, energy is 291.01492, rmsd is 32.83455
sib.fastconf.EADock3: Minimizing binding mode 873, energy is 291.15814, rmsd is 32.439472
sib.fastconf.EADock3: Minimizing binding mode 874, energy is 291.46732, rmsd is 36.466763
sib.fastconf.EADock3: Minimizing binding mode 875, energy is 291.8059, rmsd is 31.958166
sib.fastconf.EADock3: Minimizing binding mode 876, energy is 291.9266, rmsd is 44.015053
sib.fastconf.EADock3: Minimizing binding mode 877, energy is 292.1853, rmsd is 33.959637
sib.fastconf.EADock3: Minimizing binding mode 878, energy is 292.40387, rmsd is 39.149933
sib.fastconf.EADock3: Minimizing binding mode 879, energy is 292.48315, rmsd is 42.66548
sib.fastconf.EADock3: Minimizing binding mode 880, energy is 292.85944, rmsd is 39.53042
sib.fastconf.EADock3: Minimizing binding mode 881, energy is 292.95218, rmsd is 46.45494
sib.fastconf.EADock3: Minimizing binding mode 882, energy is 293.10242, rmsd is 1.4355671
sib.fastconf.EADock3: Minimizing binding mode 883, energy is 293.22455, rmsd is 45.8973
sib.fastconf.EADock3: Minimizing binding mode 884, energy is 293.3735, rmsd is 45.791904
sib.fastconf.EADock3: Minimizing binding mode 885, energy is 293.49078, rmsd is 37.532024
sib.fastconf.EADock3: Minimizing binding mode 886, energy is 293.4923, rmsd is 37.590054
sib.fastconf.EADock3: Minimizing binding mode 887, energy is 293.5076, rmsd is 3.097462
sib.fastconf.EADock3: Minimizing binding mode 888, energy is 293.7827, rmsd is 10.587082
sib.fastconf.EADock3: Minimizing binding mode 889, energy is 293.8978, rmsd is 38.173534
sib.fastconf.EADock3: Minimizing binding mode 890, energy is 294.23804, rmsd is 11.238152
sib.fastconf.EADock3: Minimizing binding mode 891, energy is 295.40793, rmsd is 31.211235
sib.fastconf.EADock3: Minimizing binding mode 892, energy is 295.6549, rmsd is 65.798965
sib.fastconf.EADock3: Minimizing binding mode 893, energy is 296.14035, rmsd is 34.375557
sib.fastconf.EADock3: Minimizing binding mode 894, energy is 296.25302, rmsd is 30.43455
sib.fastconf.EADock3: Minimizing binding mode 895, energy is 297.22498, rmsd is 1.534601
sib.fastconf.EADock3: Minimizing binding mode 896, energy is 297.39413, rmsd is 2.298688
sib.fastconf.EADock3: Minimizing binding mode 897, energy is 297.9865, rmsd is 38.030632
sib.fastconf.EADock3: Minimizing binding mode 898, energy is 297.99423, rmsd is 63.989105
sib.fastconf.EADock3: Minimizing binding mode 899, energy is 298.0613, rmsd is 42.432236
sib.fastconf.EADock3: Minimizing binding mode 900, energy is 298.11487, rmsd is 30.95805
sib.fastconf.EADock3: Minimizing binding mode 901, energy is 298.60052, rmsd is 39.173527
sib.fastconf.EADock3: Minimizing binding mode 902, energy is 298.8463, rmsd is 45.23702
sib.fastconf.EADock3: Minimizing binding mode 903, energy is 298.89886, rmsd is 3.198369
sib.fastconf.EADock3: Minimizing binding mode 904, energy is 299.01242, rmsd is 65.07344
sib.fastconf.EADock3: Minimizing binding mode 905, energy is 299.0239, rmsd is 43.25419
sib.fastconf.EADock3: Minimizing binding mode 906, energy is 299.1044, rmsd is 2.397636
sib.fastconf.EADock3: Minimizing binding mode 907, energy is 299.5199, rmsd is 48.31903
sib.fastconf.EADock3: Minimizing binding mode 908, energy is 299.56497, rmsd is 46.746246
sib.fastconf.EADock3: Minimizing binding mode 909, energy is 299.932, rmsd is 47.767395
sib.fastconf.EADock3: Minimizing binding mode 910, energy is 299.93613, rmsd is 3.4943347
sib.fastconf.EADock3: Minimizing binding mode 911, energy is 300.05087, rmsd is 44.953
sib.fastconf.EADock3: Minimizing binding mode 912, energy is 300.1347, rmsd is 44.35912
sib.fastconf.EADock3: Minimizing binding mode 913, energy is 300.20157, rmsd is 11.419314
sib.fastconf.EADock3: Minimizing binding mode 914, energy is 300.82678, rmsd is 34.348408
sib.fastconf.EADock3: Minimizing binding mode 915, energy is 301.02954, rmsd is 64.80062
sib.fastconf.EADock3: Minimizing binding mode 916, energy is 301.12442, rmsd is 34.119946
sib.fastconf.EADock3: Minimizing binding mode 917, energy is 301.13107, rmsd is 3.2511585
sib.fastconf.EADock3: Minimizing binding mode 918, energy is 301.18384, rmsd is 31.215998
sib.fastconf.EADock3: Minimizing binding mode 919, energy is 301.19766, rmsd is 30.71742
sib.fastconf.EADock3: Minimizing binding mode 920, energy is 301.2988, rmsd is 44.89104
sib.fastconf.EADock3: Minimizing binding mode 921, energy is 301.39905, rmsd is 40.69947
sib.fastconf.EADock3: Minimizing binding mode 922, energy is 301.42715, rmsd is 43.661884
sib.fastconf.EADock3: Minimizing binding mode 923, energy is 301.42752, rmsd is 13.75791
sib.fastconf.EADock3: Minimizing binding mode 924, energy is 301.59952, rmsd is 12.715501
sib.fastconf.EADock3: Minimizing binding mode 925, energy is 301.97006, rmsd is 65.40694
sib.fastconf.EADock3: Minimizing binding mode 926, energy is 302.1806, rmsd is 43.128807
sib.fastconf.EADock3: Minimizing binding mode 927, energy is 302.48453, rmsd is 2.2987537
sib.fastconf.EADock3: Minimizing binding mode 928, energy is 302.6416, rmsd is 44.37455
sib.fastconf.EADock3: Minimizing binding mode 929, energy is 303.00836, rmsd is 42.95483
sib.fastconf.EADock3: Minimizing binding mode 930, energy is 303.18536, rmsd is 30.6522
sib.fastconf.EADock3: Minimizing binding mode 931, energy is 303.20438, rmsd is 2.5092733
sib.fastconf.EADock3: Minimizing binding mode 932, energy is 303.54446, rmsd is 43.2602
sib.fastconf.EADock3: Minimizing binding mode 933, energy is 303.8935, rmsd is 46.32759
sib.fastconf.EADock3: Minimizing binding mode 934, energy is 304.21506, rmsd is 44.094135
sib.fastconf.EADock3: Minimizing binding mode 935, energy is 304.37653, rmsd is 51.609386
sib.fastconf.EADock3: Minimizing binding mode 936, energy is 304.46356, rmsd is 3.7415164
sib.fastconf.EADock3: Minimizing binding mode 937, energy is 304.83597, rmsd is 39.442245
sib.fastconf.EADock3: Minimizing binding mode 938, energy is 304.8777, rmsd is 39.82692
sib.fastconf.EADock3: Minimizing binding mode 939, energy is 305.04193, rmsd is 2.3013673
sib.fastconf.EADock3: Minimizing binding mode 940, energy is 305.0665, rmsd is 41.1062
sib.fastconf.EADock3: Minimizing binding mode 941, energy is 305.73822, rmsd is 22.261599
sib.fastconf.EADock3: Minimizing binding mode 942, energy is 306.0068, rmsd is 2.932545
sib.fastconf.EADock3: Minimizing binding mode 943, energy is 306.06757, rmsd is 9.34857
sib.fastconf.EADock3: Minimizing binding mode 944, energy is 306.0815, rmsd is 47.182793
sib.fastconf.EADock3: Minimizing binding mode 945, energy is 306.2363, rmsd is 11.90397
sib.fastconf.EADock3: Minimizing binding mode 946, energy is 306.48633, rmsd is 64.69472
sib.fastconf.EADock3: Minimizing binding mode 947, energy is 306.48654, rmsd is 37.041924
sib.fastconf.EADock3: Minimizing binding mode 948, energy is 306.81107, rmsd is 32.531406
sib.fastconf.EADock3: Minimizing binding mode 949, energy is 306.95514, rmsd is 34.25333
sib.fastconf.EADock3: Minimizing binding mode 950, energy is 307.07883, rmsd is 44.07656
sib.fastconf.EADock3: Minimizing binding mode 951, energy is 307.10477, rmsd is 40.87521
sib.fastconf.EADock3: Minimizing binding mode 952, energy is 307.39117, rmsd is 31.684795
sib.fastconf.EADock3: Minimizing binding mode 953, energy is 307.45035, rmsd is 65.662636
sib.fastconf.EADock3: Minimizing binding mode 954, energy is 307.9579, rmsd is 46.06445
sib.fastconf.EADock3: Minimizing binding mode 955, energy is 307.97003, rmsd is 42.05441
sib.fastconf.EADock3: Minimizing binding mode 956, energy is 308.22302, rmsd is 42.485916
sib.fastconf.EADock3: Minimizing binding mode 957, energy is 308.2547, rmsd is 10.787857
sib.fastconf.EADock3: Minimizing binding mode 958, energy is 308.33286, rmsd is 42.052032
sib.fastconf.EADock3: Minimizing binding mode 959, energy is 308.41025, rmsd is 36.508186
sib.fastconf.EADock3: Minimizing binding mode 960, energy is 308.49435, rmsd is 31.748684
sib.fastconf.EADock3: Minimizing binding mode 961, energy is 308.5793, rmsd is 3.3440292
sib.fastconf.EADock3: Minimizing binding mode 962, energy is 308.7512, rmsd is 45.876633
sib.fastconf.EADock3: Minimizing binding mode 963, energy is 308.94156, rmsd is 45.901646
sib.fastconf.EADock3: Minimizing binding mode 964, energy is 309.02097, rmsd is 10.205009
sib.fastconf.EADock3: Minimizing binding mode 965, energy is 309.34982, rmsd is 41.61906
sib.fastconf.EADock3: Minimizing binding mode 966, energy is 309.48303, rmsd is 42.757545
sib.fastconf.EADock3: Minimizing binding mode 967, energy is 309.54556, rmsd is 29.953758
sib.fastconf.EADock3: Minimizing binding mode 968, energy is 309.54736, rmsd is 3.3514931
sib.fastconf.EADock3: Minimizing binding mode 969, energy is 309.77722, rmsd is 31.019018
sib.fastconf.EADock3: Minimizing binding mode 970, energy is 310.2137, rmsd is 38.495537
sib.fastconf.EADock3: Minimizing binding mode 971, energy is 310.2745, rmsd is 37.9613
sib.fastconf.EADock3: Minimizing binding mode 972, energy is 310.28577, rmsd is 33.17009
sib.fastconf.EADock3: Minimizing binding mode 973, energy is 310.72354, rmsd is 46.250668
sib.fastconf.EADock3: Minimizing binding mode 974, energy is 311.49652, rmsd is 40.551945
sib.fastconf.EADock3: Minimizing binding mode 975, energy is 311.95093, rmsd is 36.31746
sib.fastconf.EADock3: Minimizing binding mode 976, energy is 311.98065, rmsd is 30.802017
sib.fastconf.EADock3: Minimizing binding mode 977, energy is 312.13242, rmsd is 3.1614163
sib.fastconf.EADock3: Minimizing binding mode 978, energy is 312.15482, rmsd is 30.118843
sib.fastconf.EADock3: Minimizing binding mode 979, energy is 312.24216, rmsd is 34.269638
sib.fastconf.EADock3: Minimizing binding mode 980, energy is 312.71265, rmsd is 46.80519
sib.fastconf.EADock3: Minimizing binding mode 981, energy is 312.71432, rmsd is 32.625153
sib.fastconf.EADock3: Minimizing binding mode 982, energy is 313.0696, rmsd is 52.036785
sib.fastconf.EADock3: Minimizing binding mode 983, energy is 313.11746, rmsd is 2.861495
sib.fastconf.EADock3: Minimizing binding mode 984, energy is 313.41904, rmsd is 2.6964328
sib.fastconf.EADock3: Minimizing binding mode 985, energy is 313.55124, rmsd is 34.748016
sib.fastconf.EADock3: Minimizing binding mode 986, energy is 313.67084, rmsd is 65.20203
sib.fastconf.EADock3: Minimizing binding mode 987, energy is 313.87598, rmsd is 30.861027
sib.fastconf.EADock3: Minimizing binding mode 988, energy is 314.04745, rmsd is 2.1452487
sib.fastconf.EADock3: Minimizing binding mode 989, energy is 314.14313, rmsd is 31.386688
sib.fastconf.EADock3: Minimizing binding mode 990, energy is 314.47256, rmsd is 45.73689
sib.fastconf.EADock3: Minimizing binding mode 991, energy is 314.83987, rmsd is 30.485703
sib.fastconf.EADock3: Minimizing binding mode 992, energy is 314.929, rmsd is 44.167892
sib.fastconf.EADock3: Minimizing binding mode 993, energy is 315.274, rmsd is 34.084805
sib.fastconf.EADock3: Minimizing binding mode 994, energy is 315.8304, rmsd is 32.200233
sib.fastconf.EADock3: Minimizing binding mode 995, energy is 316.12637, rmsd is 41.46644
sib.fastconf.EADock3: Minimizing binding mode 996, energy is 316.4372, rmsd is 38.146606
sib.fastconf.EADock3: Minimizing binding mode 997, energy is 316.8203, rmsd is 34.680794
sib.fastconf.EADock3: Minimizing binding mode 998, energy is 317.38412, rmsd is 28.810886
sib.fastconf.EADock3: Minimizing binding mode 999, energy is 317.6035, rmsd is 3.3551097
sib.fastconf.EADock3: Minimizing binding mode 1000, energy is 317.6784, rmsd is 35.076294
sib.fastconf.EADock3: Minimizing binding mode 1001, energy is 317.81326, rmsd is 0.97093713
sib.fastconf.EADock3: Minimizing binding mode 1002, energy is 317.84436, rmsd is 43.543415
sib.fastconf.EADock3: Minimizing binding mode 1003, energy is 318.01813, rmsd is 11.424104
sib.fastconf.EADock3: Minimizing binding mode 1004, energy is 318.0417, rmsd is 10.120054
sib.fastconf.EADock3: Minimizing binding mode 1005, energy is 318.07526, rmsd is 3.3325486
sib.fastconf.EADock3: Minimizing binding mode 1006, energy is 318.12155, rmsd is 1.3476783
sib.fastconf.EADock3: Minimizing binding mode 1007, energy is 318.44687, rmsd is 36.219513
sib.fastconf.EADock3: Minimizing binding mode 1008, energy is 318.60123, rmsd is 30.765884
sib.fastconf.EADock3: Minimizing binding mode 1009, energy is 318.68625, rmsd is 31.330194
sib.fastconf.EADock3: Minimizing binding mode 1010, energy is 318.76773, rmsd is 39.8979
sib.fastconf.EADock3: Minimizing binding mode 1011, energy is 318.76825, rmsd is 34.322098
sib.fastconf.EADock3: Minimizing binding mode 1012, energy is 318.83325, rmsd is 45.837406
sib.fastconf.EADock3: Minimizing binding mode 1013, energy is 318.9314, rmsd is 12.035504
sib.fastconf.EADock3: Minimizing binding mode 1014, energy is 319.0905, rmsd is 31.814018
sib.fastconf.EADock3: Minimizing binding mode 1015, energy is 319.25912, rmsd is 13.461759
sib.fastconf.EADock3: Minimizing binding mode 1016, energy is 319.32166, rmsd is 35.605988
sib.fastconf.EADock3: Minimizing binding mode 1017, energy is 319.441, rmsd is 43.936176
sib.fastconf.EADock3: Minimizing binding mode 1018, energy is 319.84772, rmsd is 35.59453
sib.fastconf.EADock3: Minimizing binding mode 1019, energy is 320.90518, rmsd is 42.552162
sib.fastconf.EADock3: Minimizing binding mode 1020, energy is 321.0748, rmsd is 2.0781188
sib.fastconf.EADock3: Minimizing binding mode 1021, energy is 321.30582, rmsd is 36.742733
sib.fastconf.EADock3: Minimizing binding mode 1022, energy is 321.4356, rmsd is 67.05891
sib.fastconf.EADock3: Minimizing binding mode 1023, energy is 321.58093, rmsd is 31.326025
sib.fastconf.EADock3: Minimizing binding mode 1024, energy is 322.0289, rmsd is 46.240166
sib.fastconf.EADock3: Minimizing binding mode 1025, energy is 322.1167, rmsd is 46.049877
sib.fastconf.EADock3: Minimizing binding mode 1026, energy is 322.7811, rmsd is 2.6138816
sib.fastconf.EADock3: Minimizing binding mode 1027, energy is 323.13928, rmsd is 44.144978
sib.fastconf.EADock3: Minimizing binding mode 1028, energy is 323.6649, rmsd is 44.56033
sib.fastconf.EADock3: Minimizing binding mode 1029, energy is 323.681, rmsd is 30.895552
sib.fastconf.EADock3: Minimizing binding mode 1030, energy is 323.9997, rmsd is 40.200504
sib.fastconf.EADock3: Minimizing binding mode 1031, energy is 324.04022, rmsd is 30.752966
sib.fastconf.EADock3: Minimizing binding mode 1032, energy is 324.2658, rmsd is 38.95828
sib.fastconf.EADock3: Minimizing binding mode 1033, energy is 324.30286, rmsd is 42.750977
sib.fastconf.EADock3: Minimizing binding mode 1034, energy is 324.62305, rmsd is 58.95918
sib.fastconf.EADock3: Minimizing binding mode 1035, energy is 324.69647, rmsd is 34.709446
sib.fastconf.EADock3: Minimizing binding mode 1036, energy is 324.93967, rmsd is 32.78102
sib.fastconf.EADock3: Minimizing binding mode 1037, energy is 324.97086, rmsd is 66.62306
sib.fastconf.EADock3: Minimizing binding mode 1038, energy is 325.02048, rmsd is 1.3334858
sib.fastconf.EADock3: Minimizing binding mode 1039, energy is 325.02203, rmsd is 41.315437
sib.fastconf.EADock3: Minimizing binding mode 1040, energy is 325.06122, rmsd is 29.745071
sib.fastconf.EADock3: Minimizing binding mode 1041, energy is 325.27362, rmsd is 40.79569
sib.fastconf.EADock3: Minimizing binding mode 1042, energy is 325.3118, rmsd is 38.068344
sib.fastconf.EADock3: Minimizing binding mode 1043, energy is 326.15604, rmsd is 3.227255
sib.fastconf.EADock3: Minimizing binding mode 1044, energy is 326.22076, rmsd is 46.092575
sib.fastconf.EADock3: Minimizing binding mode 1045, energy is 326.34738, rmsd is 33.621803
sib.fastconf.EADock3: Minimizing binding mode 1046, energy is 326.37262, rmsd is 2.9675608
sib.fastconf.EADock3: Minimizing binding mode 1047, energy is 326.76068, rmsd is 34.216454
sib.fastconf.EADock3: Minimizing binding mode 1048, energy is 326.7623, rmsd is 37.715355
sib.fastconf.EADock3: Minimizing binding mode 1049, energy is 326.87833, rmsd is 44.416435
sib.fastconf.EADock3: Minimizing binding mode 1050, energy is 326.9956, rmsd is 45.53801
sib.fastconf.EADock3: Minimizing binding mode 1051, energy is 327.00415, rmsd is 2.584702
sib.fastconf.EADock3: Minimizing binding mode 1052, energy is 327.06522, rmsd is 30.165195
sib.fastconf.EADock3: Minimizing binding mode 1053, energy is 327.0707, rmsd is 65.359406
sib.fastconf.EADock3: Minimizing binding mode 1054, energy is 327.1092, rmsd is 43.17482
sib.fastconf.EADock3: Minimizing binding mode 1055, energy is 327.12045, rmsd is 64.42146
sib.fastconf.EADock3: Minimizing binding mode 1056, energy is 327.67407, rmsd is 31.010876
sib.fastconf.EADock3: Minimizing binding mode 1057, energy is 327.7591, rmsd is 1.6304345
sib.fastconf.EADock3: Minimizing binding mode 1058, energy is 327.80524, rmsd is 2.4710267
sib.fastconf.EADock3: Minimizing binding mode 1059, energy is 327.89642, rmsd is 30.385778
sib.fastconf.EADock3: Minimizing binding mode 1060, energy is 328.0213, rmsd is 42.013546
sib.fastconf.EADock3: Minimizing binding mode 1061, energy is 328.31525, rmsd is 41.92247
sib.fastconf.EADock3: Minimizing binding mode 1062, energy is 328.34412, rmsd is 64.56644
sib.fastconf.EADock3: Minimizing binding mode 1063, energy is 328.38614, rmsd is 41.69159
sib.fastconf.EADock3: Minimizing binding mode 1064, energy is 328.9967, rmsd is 1.1598585
sib.fastconf.EADock3: Minimizing binding mode 1065, energy is 329.02832, rmsd is 66.84615
sib.fastconf.EADock3: Minimizing binding mode 1066, energy is 329.39212, rmsd is 29.319407
sib.fastconf.EADock3: Minimizing binding mode 1067, energy is 329.7189, rmsd is 33.019146
sib.fastconf.EADock3: Minimizing binding mode 1068, energy is 329.85364, rmsd is 32.97564
sib.fastconf.EADock3: Minimizing binding mode 1069, energy is 330.0009, rmsd is 33.329983
sib.fastconf.EADock3: Minimizing binding mode 1070, energy is 330.23523, rmsd is 3.0295203
sib.fastconf.EADock3: Minimizing binding mode 1071, energy is 330.4332, rmsd is 34.354992
sib.fastconf.EADock3: Minimizing binding mode 1072, energy is 330.44162, rmsd is 35.731865
sib.fastconf.EADock3: Minimizing binding mode 1073, energy is 331.46564, rmsd is 29.712467
sib.fastconf.EADock3: Minimizing binding mode 1074, energy is 331.49533, rmsd is 2.69756
sib.fastconf.EADock3: Minimizing binding mode 1075, energy is 331.51938, rmsd is 11.363133
sib.fastconf.EADock3: Minimizing binding mode 1076, energy is 331.66498, rmsd is 2.346689
sib.fastconf.EADock3: Minimizing binding mode 1077, energy is 331.9363, rmsd is 31.531693
sib.fastconf.EADock3: Minimizing binding mode 1078, energy is 332.18985, rmsd is 2.4059215
sib.fastconf.EADock3: Minimizing binding mode 1079, energy is 332.27826, rmsd is 41.52303
sib.fastconf.EADock3: Minimizing binding mode 1080, energy is 332.5162, rmsd is 1.279447
sib.fastconf.EADock3: Minimizing binding mode 1081, energy is 332.5669, rmsd is 33.17288
sib.fastconf.EADock3: Minimizing binding mode 1082, energy is 332.60678, rmsd is 35.09066
sib.fastconf.EADock3: Minimizing binding mode 1083, energy is 332.62906, rmsd is 46.116398
sib.fastconf.EADock3: Minimizing binding mode 1084, energy is 333.98468, rmsd is 30.167015
sib.fastconf.EADock3: Minimizing binding mode 1085, energy is 334.04898, rmsd is 34.26526
sib.fastconf.EADock3: Minimizing binding mode 1086, energy is 334.16284, rmsd is 3.2747293
sib.fastconf.EADock3: Minimizing binding mode 1087, energy is 334.47693, rmsd is 41.435085
sib.fastconf.EADock3: Minimizing binding mode 1088, energy is 334.5955, rmsd is 2.8338344
sib.fastconf.EADock3: Minimizing binding mode 1089, energy is 334.76407, rmsd is 32.16547
sib.fastconf.EADock3: Minimizing binding mode 1090, energy is 335.11688, rmsd is 2.5990472
sib.fastconf.EADock3: Minimizing binding mode 1091, energy is 335.63785, rmsd is 56.231255
sib.fastconf.EADock3: Minimizing binding mode 1092, energy is 336.1414, rmsd is 32.546585
sib.fastconf.EADock3: Minimizing binding mode 1093, energy is 336.44498, rmsd is 38.429928
sib.fastconf.EADock3: Minimizing binding mode 1094, energy is 336.47153, rmsd is 41.756275
sib.fastconf.EADock3: Minimizing binding mode 1095, energy is 336.51376, rmsd is 42.739742
sib.fastconf.EADock3: Minimizing binding mode 1096, energy is 336.52454, rmsd is 39.07534
sib.fastconf.EADock3: Minimizing binding mode 1097, energy is 336.76813, rmsd is 35.56945
sib.fastconf.EADock3: Minimizing binding mode 1098, energy is 337.2635, rmsd is 54.15585
sib.fastconf.EADock3: Minimizing binding mode 1099, energy is 337.57034, rmsd is 40.392776
sib.fastconf.EADock3: Minimizing binding mode 1100, energy is 337.7686, rmsd is 1.4081262
sib.fastconf.EADock3: Minimizing binding mode 1101, energy is 337.77045, rmsd is 10.040506
sib.fastconf.EADock3: Minimizing binding mode 1102, energy is 337.93213, rmsd is 35.72639
sib.fastconf.EADock3: Minimizing binding mode 1103, energy is 338.27878, rmsd is 38.95782
sib.fastconf.EADock3: Minimizing binding mode 1104, energy is 338.64264, rmsd is 34.18396
sib.fastconf.EADock3: Minimizing binding mode 1105, energy is 338.95566, rmsd is 43.701115
sib.fastconf.EADock3: Minimizing binding mode 1106, energy is 339.31198, rmsd is 41.65737
sib.fastconf.EADock3: Minimizing binding mode 1107, energy is 339.44846, rmsd is 31.09896
sib.fastconf.EADock3: Minimizing binding mode 1108, energy is 339.63937, rmsd is 44.937572
sib.fastconf.EADock3: Minimizing binding mode 1109, energy is 339.73166, rmsd is 33.665024
sib.fastconf.EADock3: Minimizing binding mode 1110, energy is 340.09695, rmsd is 40.899414
sib.fastconf.EADock3: Minimizing binding mode 1111, energy is 340.10617, rmsd is 34.22017
sib.fastconf.EADock3: Minimizing binding mode 1112, energy is 340.1419, rmsd is 33.390957
sib.fastconf.EADock3: Minimizing binding mode 1113, energy is 340.3903, rmsd is 1.911785
sib.fastconf.EADock3: Minimizing binding mode 1114, energy is 340.43295, rmsd is 42.09962
sib.fastconf.EADock3: Minimizing binding mode 1115, energy is 340.626, rmsd is 30.015703
sib.fastconf.EADock3: Minimizing binding mode 1116, energy is 340.92426, rmsd is 43.437485
sib.fastconf.EADock3: Minimizing binding mode 1117, energy is 341.144, rmsd is 36.485317
sib.fastconf.EADock3: Minimizing binding mode 1118, energy is 341.27383, rmsd is 45.688065
sib.fastconf.EADock3: Minimizing binding mode 1119, energy is 341.81216, rmsd is 9.669242
sib.fastconf.EADock3: Minimizing binding mode 1120, energy is 341.9823, rmsd is 42.371647
sib.fastconf.EADock3: Minimizing binding mode 1121, energy is 342.09833, rmsd is 41.957817
sib.fastconf.EADock3: Minimizing binding mode 1122, energy is 342.27472, rmsd is 30.18347
sib.fastconf.EADock3: Minimizing binding mode 1123, energy is 342.38095, rmsd is 2.825885
sib.fastconf.EADock3: Minimizing binding mode 1124, energy is 342.7154, rmsd is 40.37481
sib.fastconf.EADock3: Minimizing binding mode 1125, energy is 342.9912, rmsd is 33.026325
sib.fastconf.EADock3: Minimizing binding mode 1126, energy is 343.31964, rmsd is 36.454346
sib.fastconf.EADock3: Minimizing binding mode 1127, energy is 343.5689, rmsd is 44.696022
sib.fastconf.EADock3: Minimizing binding mode 1128, energy is 343.87872, rmsd is 32.002182
sib.fastconf.EADock3: Minimizing binding mode 1129, energy is 344.2612, rmsd is 3.3026574
sib.fastconf.EADock3: Minimizing binding mode 1130, energy is 344.28717, rmsd is 32.95866
sib.fastconf.EADock3: Minimizing binding mode 1131, energy is 345.09354, rmsd is 2.0378149
sib.fastconf.EADock3: Minimizing binding mode 1132, energy is 345.11002, rmsd is 1.597354
sib.fastconf.EADock3: Minimizing binding mode 1133, energy is 345.27496, rmsd is 2.3972273
sib.fastconf.EADock3: Minimizing binding mode 1134, energy is 345.77063, rmsd is 65.44833
sib.fastconf.EADock3: Minimizing binding mode 1135, energy is 346.0109, rmsd is 43.470932
sib.fastconf.EADock3: Minimizing binding mode 1136, energy is 346.1957, rmsd is 37.723614
sib.fastconf.EADock3: Minimizing binding mode 1137, energy is 346.54916, rmsd is 66.83684
sib.fastconf.EADock3: Minimizing binding mode 1138, energy is 346.67755, rmsd is 1.54176
sib.fastconf.EADock3: Minimizing binding mode 1139, energy is 346.6782, rmsd is 46.24806
sib.fastconf.EADock3: Minimizing binding mode 1140, energy is 346.9649, rmsd is 33.0011
sib.fastconf.EADock3: Minimizing binding mode 1141, energy is 347.18295, rmsd is 34.07603
sib.fastconf.EADock3: Minimizing binding mode 1142, energy is 347.48267, rmsd is 40.59984
sib.fastconf.EADock3: Minimizing binding mode 1143, energy is 347.7863, rmsd is 12.575619
sib.fastconf.EADock3: Minimizing binding mode 1144, energy is 347.85538, rmsd is 37.205486
sib.fastconf.EADock3: Minimizing binding mode 1145, energy is 348.18478, rmsd is 3.81836
sib.fastconf.EADock3: Minimizing binding mode 1146, energy is 348.31863, rmsd is 31.406118
sib.fastconf.EADock3: Minimizing binding mode 1147, energy is 348.386, rmsd is 65.92112
sib.fastconf.EADock3: Minimizing binding mode 1148, energy is 348.41425, rmsd is 53.51518
sib.fastconf.EADock3: Minimizing binding mode 1149, energy is 348.54865, rmsd is 2.2489133
sib.fastconf.EADock3: Minimizing binding mode 1150, energy is 348.60532, rmsd is 32.088894
sib.fastconf.EADock3: Minimizing binding mode 1151, energy is 348.70187, rmsd is 32.4815
sib.fastconf.EADock3: Minimizing binding mode 1152, energy is 349.61978, rmsd is 32.931454
sib.fastconf.EADock3: Minimizing binding mode 1153, energy is 349.81964, rmsd is 3.0253956
sib.fastconf.EADock3: Minimizing binding mode 1154, energy is 350.0541, rmsd is 44.432617
sib.fastconf.EADock3: Minimizing binding mode 1155, energy is 350.31772, rmsd is 30.734083
sib.fastconf.EADock3: Minimizing binding mode 1156, energy is 350.87262, rmsd is 42.71659
sib.fastconf.EADock3: Minimizing binding mode 1157, energy is 351.2674, rmsd is 11.866324
sib.fastconf.EADock3: Minimizing binding mode 1158, energy is 351.27914, rmsd is 43.470737
sib.fastconf.EADock3: Minimizing binding mode 1159, energy is 352.1627, rmsd is 44.77434
sib.fastconf.EADock3: Minimizing binding mode 1160, energy is 352.43863, rmsd is 32.762016
sib.fastconf.EADock3: Minimizing binding mode 1161, energy is 353.20566, rmsd is 41.86739
sib.fastconf.EADock3: Minimizing binding mode 1162, energy is 353.49353, rmsd is 37.79999
sib.fastconf.EADock3: Minimizing binding mode 1163, energy is 353.5228, rmsd is 38.18758
sib.fastconf.EADock3: Minimizing binding mode 1164, energy is 353.53784, rmsd is 41.329697
sib.fastconf.EADock3: Minimizing binding mode 1165, energy is 354.15244, rmsd is 37.583286
sib.fastconf.EADock3: Minimizing binding mode 1166, energy is 354.2268, rmsd is 43.13213
sib.fastconf.EADock3: Minimizing binding mode 1167, energy is 354.6296, rmsd is 66.761894
sib.fastconf.EADock3: Minimizing binding mode 1168, energy is 356.18665, rmsd is 31.301466
sib.fastconf.EADock3: Minimizing binding mode 1169, energy is 356.31787, rmsd is 46.547516
sib.fastconf.EADock3: Minimizing binding mode 1170, energy is 356.49057, rmsd is 31.362215
sib.fastconf.EADock3: Minimizing binding mode 1171, energy is 356.5413, rmsd is 32.484867
sib.fastconf.EADock3: Minimizing binding mode 1172, energy is 356.55344, rmsd is 32.556408
sib.fastconf.EADock3: Minimizing binding mode 1173, energy is 357.2658, rmsd is 39.874283
sib.fastconf.EADock3: Minimizing binding mode 1174, energy is 357.6875, rmsd is 52.19874
sib.fastconf.EADock3: Minimizing binding mode 1175, energy is 357.9619, rmsd is 65.54263
sib.fastconf.EADock3: Minimizing binding mode 1176, energy is 358.41388, rmsd is 42.77243
sib.fastconf.EADock3: Minimizing binding mode 1177, energy is 358.55518, rmsd is 3.2751606
sib.fastconf.EADock3: Minimizing binding mode 1178, energy is 358.55606, rmsd is 44.679398
sib.fastconf.EADock3: Minimizing binding mode 1179, energy is 358.94623, rmsd is 34.41423
sib.fastconf.EADock3: Minimizing binding mode 1180, energy is 359.02963, rmsd is 31.22981
sib.fastconf.EADock3: Minimizing binding mode 1181, energy is 359.2089, rmsd is 64.34191
sib.fastconf.EADock3: Minimizing binding mode 1182, energy is 359.32245, rmsd is 34.087406
sib.fastconf.EADock3: Minimizing binding mode 1183, energy is 359.3458, rmsd is 35.42094
sib.fastconf.EADock3: Minimizing binding mode 1184, energy is 359.5329, rmsd is 31.499048
sib.fastconf.EADock3: Minimizing binding mode 1185, energy is 359.64536, rmsd is 11.589462
sib.fastconf.EADock3: Minimizing binding mode 1186, energy is 360.104, rmsd is 31.728119
sib.fastconf.EADock3: Minimizing binding mode 1187, energy is 360.2628, rmsd is 64.5788
sib.fastconf.EADock3: Minimizing binding mode 1188, energy is 360.73282, rmsd is 11.096486
sib.fastconf.EADock3: Minimizing binding mode 1189, energy is 361.04886, rmsd is 30.892141
sib.fastconf.EADock3: Minimizing binding mode 1190, energy is 361.25574, rmsd is 42.422325
sib.fastconf.EADock3: Minimizing binding mode 1191, energy is 361.6805, rmsd is 1.9768695
sib.fastconf.EADock3: Minimizing binding mode 1192, energy is 361.97626, rmsd is 31.774382
sib.fastconf.EADock3: Minimizing binding mode 1193, energy is 362.48373, rmsd is 31.145424
sib.fastconf.EADock3: Minimizing binding mode 1194, energy is 362.6045, rmsd is 31.94122
sib.fastconf.EADock3: Minimizing binding mode 1195, energy is 363.2491, rmsd is 41.523006
sib.fastconf.EADock3: Minimizing binding mode 1196, energy is 363.363, rmsd is 36.488148
sib.fastconf.EADock3: Minimizing binding mode 1197, energy is 363.61237, rmsd is 37.827393
sib.fastconf.EADock3: Minimizing binding mode 1198, energy is 364.2669, rmsd is 40.335
sib.fastconf.EADock3: Minimizing binding mode 1199, energy is 364.38565, rmsd is 33.563213
sib.fastconf.EADock3: Minimizing binding mode 1200, energy is 364.44705, rmsd is 40.45421
sib.fastconf.EADock3: Minimizing binding mode 1201, energy is 364.65616, rmsd is 65.932785
sib.fastconf.EADock3: Minimizing binding mode 1202, energy is 364.80453, rmsd is 32.919937
sib.fastconf.EADock3: Minimizing binding mode 1203, energy is 364.9714, rmsd is 44.328552
sib.fastconf.EADock3: Minimizing binding mode 1204, energy is 365.02078, rmsd is 45.361835
sib.fastconf.EADock3: Minimizing binding mode 1205, energy is 365.12503, rmsd is 40.320515
sib.fastconf.EADock3: Minimizing binding mode 1206, energy is 365.7117, rmsd is 38.330738
sib.fastconf.EADock3: Minimizing binding mode 1207, energy is 366.01492, rmsd is 13.500198
sib.fastconf.EADock3: Minimizing binding mode 1208, energy is 366.22562, rmsd is 31.918348
sib.fastconf.EADock3: Minimizing binding mode 1209, energy is 366.59586, rmsd is 33.947918
sib.fastconf.EADock3: Minimizing binding mode 1210, energy is 366.91055, rmsd is 30.364986
sib.fastconf.EADock3: Minimizing binding mode 1211, energy is 367.0209, rmsd is 11.859789
sib.fastconf.EADock3: Minimizing binding mode 1212, energy is 368.44067, rmsd is 2.6896014
sib.fastconf.EADock3: Minimizing binding mode 1213, energy is 368.59796, rmsd is 45.965137
sib.fastconf.EADock3: Minimizing binding mode 1214, energy is 368.8034, rmsd is 35.001926
sib.fastconf.EADock3: Minimizing binding mode 1215, energy is 369.08514, rmsd is 1.6880833
sib.fastconf.EADock3: Minimizing binding mode 1216, energy is 369.2948, rmsd is 42.34502
sib.fastconf.EADock3: Minimizing binding mode 1217, energy is 369.33466, rmsd is 45.80627
sib.fastconf.EADock3: Minimizing binding mode 1218, energy is 369.51376, rmsd is 1.7892148
sib.fastconf.EADock3: Minimizing binding mode 1219, energy is 369.57022, rmsd is 2.946241
sib.fastconf.EADock3: Minimizing binding mode 1220, energy is 369.7521, rmsd is 33.239975
sib.fastconf.EADock3: Minimizing binding mode 1221, energy is 369.83328, rmsd is 46.389618
sib.fastconf.EADock3: Minimizing binding mode 1222, energy is 369.8671, rmsd is 40.909683
sib.fastconf.EADock3: Minimizing binding mode 1223, energy is 370.07852, rmsd is 40.273136
sib.fastconf.EADock3: Minimizing binding mode 1224, energy is 370.113, rmsd is 41.62709
sib.fastconf.EADock3: Minimizing binding mode 1225, energy is 370.36047, rmsd is 66.55047
sib.fastconf.EADock3: Minimizing binding mode 1226, energy is 370.36124, rmsd is 2.1952684
sib.fastconf.EADock3: Minimizing binding mode 1227, energy is 370.72552, rmsd is 34.63532
sib.fastconf.EADock3: Minimizing binding mode 1228, energy is 370.7801, rmsd is 11.168892
sib.fastconf.EADock3: Minimizing binding mode 1229, energy is 371.10883, rmsd is 32.87813
sib.fastconf.EADock3: Minimizing binding mode 1230, energy is 371.25153, rmsd is 34.760326
sib.fastconf.EADock3: Minimizing binding mode 1231, energy is 371.2536, rmsd is 35.42288
sib.fastconf.EADock3: Minimizing binding mode 1232, energy is 371.942, rmsd is 28.356094
sib.fastconf.EADock3: Minimizing binding mode 1233, energy is 372.01422, rmsd is 2.9454923
sib.fastconf.EADock3: Minimizing binding mode 1234, energy is 372.0907, rmsd is 29.729467
sib.fastconf.EADock3: Minimizing binding mode 1235, energy is 372.39838, rmsd is 33.036606
sib.fastconf.EADock3: Minimizing binding mode 1236, energy is 372.49554, rmsd is 36.443428
sib.fastconf.EADock3: Minimizing binding mode 1237, energy is 372.5571, rmsd is 65.407555
sib.fastconf.EADock3: Minimizing binding mode 1238, energy is 372.7758, rmsd is 29.698523
sib.fastconf.EADock3: Minimizing binding mode 1239, energy is 372.87283, rmsd is 43.6158
sib.fastconf.EADock3: Minimizing binding mode 1240, energy is 373.3484, rmsd is 66.331665
sib.fastconf.EADock3: Minimizing binding mode 1241, energy is 373.36398, rmsd is 30.461874
sib.fastconf.EADock3: Minimizing binding mode 1242, energy is 373.44116, rmsd is 9.922875
sib.fastconf.EADock3: Minimizing binding mode 1243, energy is 373.55692, rmsd is 30.464853
sib.fastconf.EADock3: Minimizing binding mode 1244, energy is 373.9304, rmsd is 3.427055
sib.fastconf.EADock3: Minimizing binding mode 1245, energy is 373.9359, rmsd is 40.259876
sib.fastconf.EADock3: Minimizing binding mode 1246, energy is 374.1277, rmsd is 12.299953
sib.fastconf.EADock3: Minimizing binding mode 1247, energy is 374.18802, rmsd is 37.331905
sib.fastconf.EADock3: Minimizing binding mode 1248, energy is 374.5082, rmsd is 31.968805
sib.fastconf.EADock3: Minimizing binding mode 1249, energy is 374.55347, rmsd is 32.058525
sib.fastconf.EADock3: Minimizing binding mode 1250, energy is 374.58105, rmsd is 37.139103
sib.fastconf.EADock3: Minimizing binding mode 1251, energy is 374.86313, rmsd is 45.238846
sib.fastconf.EADock3: Minimizing binding mode 1252, energy is 375.05463, rmsd is 2.935131
sib.fastconf.EADock3: Minimizing binding mode 1253, energy is 375.41483, rmsd is 31.424261
sib.fastconf.EADock3: Minimizing binding mode 1254, energy is 375.59674, rmsd is 39.09619
sib.fastconf.EADock3: Minimizing binding mode 1255, energy is 375.82245, rmsd is 64.18444
sib.fastconf.EADock3: Minimizing binding mode 1256, energy is 376.52762, rmsd is 3.4266722
sib.fastconf.EADock3: Minimizing binding mode 1257, energy is 376.62924, rmsd is 66.507996
sib.fastconf.EADock3: Minimizing binding mode 1258, energy is 378.1374, rmsd is 43.573456
sib.fastconf.EADock3: Minimizing binding mode 1259, energy is 378.5146, rmsd is 1.9239755
sib.fastconf.EADock3: Minimizing binding mode 1260, energy is 378.77274, rmsd is 42.055378
sib.fastconf.EADock3: Minimizing binding mode 1261, energy is 379.38205, rmsd is 31.11653
sib.fastconf.EADock3: Minimizing binding mode 1262, energy is 379.70322, rmsd is 42.63339
sib.fastconf.EADock3: Minimizing binding mode 1263, energy is 379.78253, rmsd is 35.54909
sib.fastconf.EADock3: Minimizing binding mode 1264, energy is 379.9217, rmsd is 10.180228
sib.fastconf.EADock3: Minimizing binding mode 1265, energy is 379.93552, rmsd is 65.12605
sib.fastconf.EADock3: Minimizing binding mode 1266, energy is 380.17862, rmsd is 43.722927
sib.fastconf.EADock3: Minimizing binding mode 1267, energy is 380.54187, rmsd is 32.081886
sib.fastconf.EADock3: Minimizing binding mode 1268, energy is 381.15375, rmsd is 12.278336
sib.fastconf.EADock3: Minimizing binding mode 1269, energy is 381.46317, rmsd is 40.35921
sib.fastconf.EADock3: Minimizing binding mode 1270, energy is 381.54053, rmsd is 30.517643
sib.fastconf.EADock3: Minimizing binding mode 1271, energy is 381.54306, rmsd is 9.744485
sib.fastconf.EADock3: Minimizing binding mode 1272, energy is 382.1989, rmsd is 30.873228
sib.fastconf.EADock3: Minimizing binding mode 1273, energy is 382.867, rmsd is 64.70628
sib.fastconf.EADock3: Minimizing binding mode 1274, energy is 383.4513, rmsd is 12.535848
sib.fastconf.EADock3: Minimizing binding mode 1275, energy is 383.58478, rmsd is 34.16475
sib.fastconf.EADock3: Minimizing binding mode 1276, energy is 383.75647, rmsd is 39.099716
sib.fastconf.EADock3: Minimizing binding mode 1277, energy is 384.08316, rmsd is 44.184822
sib.fastconf.EADock3: Minimizing binding mode 1278, energy is 384.13675, rmsd is 33.73577
sib.fastconf.EADock3: Minimizing binding mode 1279, energy is 386.6188, rmsd is 28.598194
sib.fastconf.EADock3: Minimizing binding mode 1280, energy is 386.7582, rmsd is 41.767017
sib.fastconf.EADock3: Minimizing binding mode 1281, energy is 387.05432, rmsd is 32.42928
sib.fastconf.EADock3: Minimizing binding mode 1282, energy is 387.18137, rmsd is 45.27279
sib.fastconf.EADock3: Minimizing binding mode 1283, energy is 387.27017, rmsd is 30.216078
sib.fastconf.EADock3: Minimizing binding mode 1284, energy is 387.92297, rmsd is 38.717403
sib.fastconf.EADock3: Minimizing binding mode 1285, energy is 388.0338, rmsd is 64.75254
sib.fastconf.EADock3: Minimizing binding mode 1286, energy is 388.3112, rmsd is 34.010223
sib.fastconf.EADock3: Minimizing binding mode 1287, energy is 388.4315, rmsd is 46.039547
sib.fastconf.EADock3: Minimizing binding mode 1288, energy is 388.6625, rmsd is 1.5699289
sib.fastconf.EADock3: Minimizing binding mode 1289, energy is 388.81793, rmsd is 34.331173
sib.fastconf.EADock3: Minimizing binding mode 1290, energy is 388.98453, rmsd is 44.06097
sib.fastconf.EADock3: Minimizing binding mode 1291, energy is 389.19183, rmsd is 34.99801
sib.fastconf.EADock3: Minimizing binding mode 1292, energy is 389.40305, rmsd is 44.859524
sib.fastconf.EADock3: Minimizing binding mode 1293, energy is 390.144, rmsd is 3.031526
sib.fastconf.EADock3: Minimizing binding mode 1294, energy is 390.1523, rmsd is 2.8998628
sib.fastconf.EADock3: Minimizing binding mode 1295, energy is 390.18204, rmsd is 66.58532
sib.fastconf.EADock3: Minimizing binding mode 1296, energy is 390.27295, rmsd is 11.190121
sib.fastconf.EADock3: Minimizing binding mode 1297, energy is 390.27853, rmsd is 1.57405
sib.fastconf.EADock3: Minimizing binding mode 1298, energy is 390.62555, rmsd is 11.529304
sib.fastconf.EADock3: Minimizing binding mode 1299, energy is 391.1927, rmsd is 40.258152
sib.fastconf.EADock3: Minimizing binding mode 1300, energy is 391.24597, rmsd is 45.762287
sib.fastconf.EADock3: Minimizing binding mode 1301, energy is 391.30984, rmsd is 67.35553
sib.fastconf.EADock3: Minimizing binding mode 1302, energy is 391.3838, rmsd is 34.525772
sib.fastconf.EADock3: Minimizing binding mode 1303, energy is 391.61404, rmsd is 32.650734
sib.fastconf.EADock3: Minimizing binding mode 1304, energy is 391.84235, rmsd is 2.735722
sib.fastconf.EADock3: Minimizing binding mode 1305, energy is 391.9492, rmsd is 27.6456
sib.fastconf.EADock3: Minimizing binding mode 1306, energy is 392.46014, rmsd is 46.56446
sib.fastconf.EADock3: Minimizing binding mode 1307, energy is 392.63416, rmsd is 63.615173
sib.fastconf.EADock3: Minimizing binding mode 1308, energy is 393.00284, rmsd is 43.46304
sib.fastconf.EADock3: Minimizing binding mode 1309, energy is 393.3397, rmsd is 44.72644
sib.fastconf.EADock3: Minimizing binding mode 1310, energy is 393.45453, rmsd is 37.402912
sib.fastconf.EADock3: Minimizing binding mode 1311, energy is 393.76804, rmsd is 40.063602
sib.fastconf.EADock3: Minimizing binding mode 1312, energy is 393.88495, rmsd is 38.58712
sib.fastconf.EADock3: Minimizing binding mode 1313, energy is 393.96698, rmsd is 12.2196665
sib.fastconf.EADock3: Minimizing binding mode 1314, energy is 394.13983, rmsd is 44.834988
sib.fastconf.EADock3: Minimizing binding mode 1315, energy is 394.3163, rmsd is 3.2234707
sib.fastconf.EADock3: Minimizing binding mode 1316, energy is 394.69525, rmsd is 37.027027
sib.fastconf.EADock3: Minimizing binding mode 1317, energy is 394.86124, rmsd is 32.73077
sib.fastconf.EADock3: Minimizing binding mode 1318, energy is 395.1352, rmsd is 64.18342
sib.fastconf.EADock3: Minimizing binding mode 1319, energy is 395.19244, rmsd is 46.68102
sib.fastconf.EADock3: Minimizing binding mode 1320, energy is 395.2121, rmsd is 33.92714
sib.fastconf.EADock3: Minimizing binding mode 1321, energy is 395.30115, rmsd is 40.515614
sib.fastconf.EADock3: Minimizing binding mode 1322, energy is 395.553, rmsd is 1.2829305
sib.fastconf.EADock3: Minimizing binding mode 1323, energy is 396.0636, rmsd is 36.53342
sib.fastconf.EADock3: Minimizing binding mode 1324, energy is 396.16492, rmsd is 34.96958
sib.fastconf.EADock3: Minimizing binding mode 1325, energy is 396.18973, rmsd is 33.00188
sib.fastconf.EADock3: Minimizing binding mode 1326, energy is 396.52014, rmsd is 30.830507
sib.fastconf.EADock3: Minimizing binding mode 1327, energy is 396.6824, rmsd is 42.83704
sib.fastconf.EADock3: Minimizing binding mode 1328, energy is 397.00873, rmsd is 42.40341
sib.fastconf.EADock3: Minimizing binding mode 1329, energy is 397.28845, rmsd is 44.332993
sib.fastconf.EADock3: Minimizing binding mode 1330, energy is 397.88596, rmsd is 31.366304
sib.fastconf.EADock3: Minimizing binding mode 1331, energy is 398.018, rmsd is 39.256958
sib.fastconf.EADock3: Minimizing binding mode 1332, energy is 398.46832, rmsd is 2.248772
sib.fastconf.EADock3: Minimizing binding mode 1333, energy is 398.80948, rmsd is 32.824883
sib.fastconf.EADock3: Minimizing binding mode 1334, energy is 399.10538, rmsd is 31.338232
sib.fastconf.EADock3: Minimizing binding mode 1335, energy is 399.21652, rmsd is 44.894684
sib.fastconf.EADock3: Minimizing binding mode 1336, energy is 399.832, rmsd is 39.707474
sib.fastconf.EADock3: Minimizing binding mode 1337, energy is 399.99823, rmsd is 31.692966
sib.fastconf.EADock3: Minimizing binding mode 1338, energy is 400.25632, rmsd is 2.6009488
sib.fastconf.EADock3: Minimizing binding mode 1339, energy is 400.28888, rmsd is 46.407963
sib.fastconf.EADock3: Minimizing binding mode 1340, energy is 400.56656, rmsd is 32.85692
sib.fastconf.EADock3: Minimizing binding mode 1341, energy is 401.32874, rmsd is 63.85897
sib.fastconf.EADock3: Minimizing binding mode 1342, energy is 401.35522, rmsd is 36.080643
sib.fastconf.EADock3: Minimizing binding mode 1343, energy is 401.49948, rmsd is 2.5261402
sib.fastconf.EADock3: Minimizing binding mode 1344, energy is 402.24402, rmsd is 2.6772044
sib.fastconf.EADock3: Minimizing binding mode 1345, energy is 402.50012, rmsd is 42.58339
sib.fastconf.EADock3: Minimizing binding mode 1346, energy is 402.9792, rmsd is 33.88802
sib.fastconf.EADock3: Minimizing binding mode 1347, energy is 403.21774, rmsd is 66.60119
sib.fastconf.EADock3: Minimizing binding mode 1348, energy is 403.67038, rmsd is 36.822712
sib.fastconf.EADock3: Minimizing binding mode 1349, energy is 403.76752, rmsd is 31.92671
sib.fastconf.EADock3: Minimizing binding mode 1350, energy is 403.827, rmsd is 32.842243
sib.fastconf.EADock3: Minimizing binding mode 1351, energy is 403.84418, rmsd is 37.09072
sib.fastconf.EADock3: Minimizing binding mode 1352, energy is 404.24158, rmsd is 37.61359
sib.fastconf.EADock3: Minimizing binding mode 1353, energy is 404.32187, rmsd is 64.38882
sib.fastconf.EADock3: Minimizing binding mode 1354, energy is 404.32568, rmsd is 44.688152
sib.fastconf.EADock3: Minimizing binding mode 1355, energy is 404.75183, rmsd is 2.2759802
sib.fastconf.EADock3: Minimizing binding mode 1356, energy is 404.87613, rmsd is 2.8066964
sib.fastconf.EADock3: Minimizing binding mode 1357, energy is 405.0028, rmsd is 1.444909
sib.fastconf.EADock3: Minimizing binding mode 1358, energy is 405.2874, rmsd is 44.109978
sib.fastconf.EADock3: Minimizing binding mode 1359, energy is 405.5053, rmsd is 41.291683
sib.fastconf.EADock3: Minimizing binding mode 1360, energy is 405.59512, rmsd is 30.859926
sib.fastconf.EADock3: Minimizing binding mode 1361, energy is 405.70154, rmsd is 46.40793
sib.fastconf.EADock3: Minimizing binding mode 1362, energy is 406.00726, rmsd is 48.40645
sib.fastconf.EADock3: Minimizing binding mode 1363, energy is 406.55298, rmsd is 33.01376
sib.fastconf.EADock3: Minimizing binding mode 1364, energy is 406.78705, rmsd is 44.068123
sib.fastconf.EADock3: Minimizing binding mode 1365, energy is 406.89014, rmsd is 40.16592
sib.fastconf.EADock3: Minimizing binding mode 1366, energy is 407.05396, rmsd is 32.092163
sib.fastconf.EADock3: Minimizing binding mode 1367, energy is 407.66028, rmsd is 31.83697
sib.fastconf.EADock3: Minimizing binding mode 1368, energy is 407.81174, rmsd is 65.036606
sib.fastconf.EADock3: Minimizing binding mode 1369, energy is 407.96716, rmsd is 43.343197
sib.fastconf.EADock3: Minimizing binding mode 1370, energy is 408.21844, rmsd is 33.54703
sib.fastconf.EADock3: Minimizing binding mode 1371, energy is 408.6961, rmsd is 35.041126
sib.fastconf.EADock3: Minimizing binding mode 1372, energy is 408.83237, rmsd is 42.283974
sib.fastconf.EADock3: Minimizing binding mode 1373, energy is 408.9994, rmsd is 29.832634
sib.fastconf.EADock3: Minimizing binding mode 1374, energy is 409.0279, rmsd is 30.242624
sib.fastconf.EADock3: Minimizing binding mode 1375, energy is 409.1903, rmsd is 43.708714
sib.fastconf.EADock3: Minimizing binding mode 1376, energy is 409.22162, rmsd is 12.015402
sib.fastconf.EADock3: Minimizing binding mode 1377, energy is 409.29993, rmsd is 64.445564
sib.fastconf.EADock3: Minimizing binding mode 1378, energy is 409.74622, rmsd is 1.6591026
sib.fastconf.EADock3: Minimizing binding mode 1379, energy is 409.86206, rmsd is 46.06412
sib.fastconf.EADock3: Minimizing binding mode 1380, energy is 409.98523, rmsd is 43.238373
sib.fastconf.EADock3: Minimizing binding mode 1381, energy is 410.1027, rmsd is 12.567252
sib.fastconf.EADock3: Minimizing binding mode 1382, energy is 410.29248, rmsd is 13.347841
sib.fastconf.EADock3: Minimizing binding mode 1383, energy is 410.30502, rmsd is 12.551684
sib.fastconf.EADock3: Minimizing binding mode 1384, energy is 410.37247, rmsd is 2.3334408
sib.fastconf.EADock3: Minimizing binding mode 1385, energy is 410.48706, rmsd is 47.565105
sib.fastconf.EADock3: Minimizing binding mode 1386, energy is 410.54755, rmsd is 44.86513
sib.fastconf.EADock3: Minimizing binding mode 1387, energy is 410.7774, rmsd is 48.566544
sib.fastconf.EADock3: Minimizing binding mode 1388, energy is 411.26743, rmsd is 42.333115
sib.fastconf.EADock3: Minimizing binding mode 1389, energy is 412.64578, rmsd is 28.212
sib.fastconf.EADock3: Minimizing binding mode 1390, energy is 413.2894, rmsd is 31.44644
sib.fastconf.EADock3: Minimizing binding mode 1391, energy is 413.44376, rmsd is 31.069021
sib.fastconf.EADock3: Minimizing binding mode 1392, energy is 413.59763, rmsd is 40.728825
sib.fastconf.EADock3: Minimizing binding mode 1393, energy is 413.7146, rmsd is 37.3136
sib.fastconf.EADock3: Minimizing binding mode 1394, energy is 413.7958, rmsd is 34.58551
sib.fastconf.EADock3: Minimizing binding mode 1395, energy is 414.14978, rmsd is 3.0815163
sib.fastconf.EADock3: Minimizing binding mode 1396, energy is 414.1721, rmsd is 30.590496
sib.fastconf.EADock3: Minimizing binding mode 1397, energy is 414.8146, rmsd is 37.138298
sib.fastconf.EADock3: Minimizing binding mode 1398, energy is 415.00903, rmsd is 30.04601
sib.fastconf.EADock3: Minimizing binding mode 1399, energy is 415.25363, rmsd is 41.812935
sib.fastconf.EADock3: Minimizing binding mode 1400, energy is 415.3076, rmsd is 41.506836
sib.fastconf.EADock3: Minimizing binding mode 1401, energy is 415.64703, rmsd is 11.37928
sib.fastconf.EADock3: Minimizing binding mode 1402, energy is 416.05884, rmsd is 65.4257
sib.fastconf.EADock3: Minimizing binding mode 1403, energy is 416.2264, rmsd is 30.472132
sib.fastconf.EADock3: Minimizing binding mode 1404, energy is 416.29733, rmsd is 39.535816
sib.fastconf.EADock3: Minimizing binding mode 1405, energy is 416.3524, rmsd is 29.981829
sib.fastconf.EADock3: Minimizing binding mode 1406, energy is 416.4309, rmsd is 35.04806
sib.fastconf.EADock3: Minimizing binding mode 1407, energy is 416.50848, rmsd is 30.196342
sib.fastconf.EADock3: Minimizing binding mode 1408, energy is 416.58282, rmsd is 11.87968
sib.fastconf.EADock3: Minimizing binding mode 1409, energy is 416.77243, rmsd is 40.422314
sib.fastconf.EADock3: Minimizing binding mode 1410, energy is 416.8164, rmsd is 27.272596
sib.fastconf.EADock3: Minimizing binding mode 1411, energy is 417.15256, rmsd is 45.844673
sib.fastconf.EADock3: Minimizing binding mode 1412, energy is 417.623, rmsd is 2.2464879
sib.fastconf.EADock3: Minimizing binding mode 1413, energy is 417.6858, rmsd is 38.88115
sib.fastconf.EADock3: Minimizing binding mode 1414, energy is 417.91098, rmsd is 30.029922
sib.fastconf.EADock3: Minimizing binding mode 1415, energy is 419.0291, rmsd is 65.78494
sib.fastconf.EADock3: Minimizing binding mode 1416, energy is 419.0329, rmsd is 35.30487
sib.fastconf.EADock3: Minimizing binding mode 1417, energy is 419.0631, rmsd is 36.8512
sib.fastconf.EADock3: Minimizing binding mode 1418, energy is 419.14557, rmsd is 42.408596
sib.fastconf.EADock3: Minimizing binding mode 1419, energy is 419.4421, rmsd is 42.30982
sib.fastconf.EADock3: Minimizing binding mode 1420, energy is 419.68765, rmsd is 45.77516
sib.fastconf.EADock3: Minimizing binding mode 1421, energy is 419.75546, rmsd is 2.716258
sib.fastconf.EADock3: Minimizing binding mode 1422, energy is 419.7582, rmsd is 2.6680567
sib.fastconf.EADock3: Minimizing binding mode 1423, energy is 420.08264, rmsd is 45.758514
sib.fastconf.EADock3: Minimizing binding mode 1424, energy is 420.7411, rmsd is 2.1481261
sib.fastconf.EADock3: Minimizing binding mode 1425, energy is 421.09265, rmsd is 11.633668
sib.fastconf.EADock3: Minimizing binding mode 1426, energy is 421.15323, rmsd is 40.36903
sib.fastconf.EADock3: Minimizing binding mode 1427, energy is 421.5212, rmsd is 14.196861
sib.fastconf.EADock3: Minimizing binding mode 1428, energy is 421.65027, rmsd is 33.944656
sib.fastconf.EADock3: Minimizing binding mode 1429, energy is 422.01605, rmsd is 32.9803
sib.fastconf.EADock3: Minimizing binding mode 1430, energy is 422.08838, rmsd is 3.39691
sib.fastconf.EADock3: Minimizing binding mode 1431, energy is 422.37927, rmsd is 64.38913
sib.fastconf.EADock3: Minimizing binding mode 1432, energy is 422.41104, rmsd is 3.149577
sib.fastconf.EADock3: Minimizing binding mode 1433, energy is 422.73242, rmsd is 45.142433
sib.fastconf.EADock3: Minimizing binding mode 1434, energy is 422.8097, rmsd is 31.921604
sib.fastconf.EADock3: Minimizing binding mode 1435, energy is 423.65887, rmsd is 30.50758
sib.fastconf.EADock3: Minimizing binding mode 1436, energy is 424.1917, rmsd is 34.747383
sib.fastconf.EADock3: Minimizing binding mode 1437, energy is 424.5247, rmsd is 31.366552
sib.fastconf.EADock3: Minimizing binding mode 1438, energy is 425.07162, rmsd is 46.439533
sib.fastconf.EADock3: Minimizing binding mode 1439, energy is 425.16516, rmsd is 44.773113
sib.fastconf.EADock3: Minimizing binding mode 1440, energy is 425.29437, rmsd is 11.326995
sib.fastconf.EADock3: Minimizing binding mode 1441, energy is 425.63394, rmsd is 43.025448
sib.fastconf.EADock3: Minimizing binding mode 1442, energy is 425.66638, rmsd is 30.001396
sib.fastconf.EADock3: Minimizing binding mode 1443, energy is 426.09827, rmsd is 46.075672
sib.fastconf.EADock3: Minimizing binding mode 1444, energy is 426.13034, rmsd is 36.83906
sib.fastconf.EADock3: Minimizing binding mode 1445, energy is 426.20667, rmsd is 39.853905
sib.fastconf.EADock3: Minimizing binding mode 1446, energy is 426.8002, rmsd is 32.67952
sib.fastconf.EADock3: Minimizing binding mode 1447, energy is 426.83624, rmsd is 35.22716
sib.fastconf.EADock3: Minimizing binding mode 1448, energy is 426.8377, rmsd is 32.1525
sib.fastconf.EADock3: Minimizing binding mode 1449, energy is 426.9118, rmsd is 1.8566408
sib.fastconf.EADock3: Minimizing binding mode 1450, energy is 426.9723, rmsd is 31.723183
sib.fastconf.EADock3: Minimizing binding mode 1451, energy is 427.31705, rmsd is 45.720592
sib.fastconf.EADock3: Minimizing binding mode 1452, energy is 427.70486, rmsd is 36.28089
sib.fastconf.EADock3: Minimizing binding mode 1453, energy is 428.4886, rmsd is 66.78366
sib.fastconf.EADock3: Minimizing binding mode 1454, energy is 428.80807, rmsd is 11.965243
sib.fastconf.EADock3: Minimizing binding mode 1455, energy is 428.8522, rmsd is 32.71062
sib.fastconf.EADock3: Minimizing binding mode 1456, energy is 428.88803, rmsd is 40.492302
sib.fastconf.EADock3: Minimizing binding mode 1457, energy is 429.2143, rmsd is 2.7789345
sib.fastconf.EADock3: Minimizing binding mode 1458, energy is 429.35715, rmsd is 2.8264773
sib.fastconf.EADock3: Minimizing binding mode 1459, energy is 429.48853, rmsd is 44.634197
sib.fastconf.EADock3: Minimizing binding mode 1460, energy is 429.83514, rmsd is 42.13858
sib.fastconf.EADock3: Minimizing binding mode 1461, energy is 429.9519, rmsd is 38.685944
sib.fastconf.EADock3: Minimizing binding mode 1462, energy is 429.96112, rmsd is 41.84917
sib.fastconf.EADock3: Minimizing binding mode 1463, energy is 430.93106, rmsd is 29.756702
sib.fastconf.EADock3: Minimizing binding mode 1464, energy is 431.0628, rmsd is 32.171616
sib.fastconf.EADock3: Minimizing binding mode 1465, energy is 431.62903, rmsd is 42.939034
sib.fastconf.EADock3: Minimizing binding mode 1466, energy is 431.75394, rmsd is 32.03598
sib.fastconf.EADock3: Minimizing binding mode 1467, energy is 432.28537, rmsd is 45.939667
sib.fastconf.EADock3: Minimizing binding mode 1468, energy is 432.71762, rmsd is 31.73077
sib.fastconf.EADock3: Minimizing binding mode 1469, energy is 432.77347, rmsd is 45.095985
sib.fastconf.EADock3: Minimizing binding mode 1470, energy is 433.18073, rmsd is 44.69458
sib.fastconf.EADock3: Minimizing binding mode 1471, energy is 433.44568, rmsd is 46.664337
sib.fastconf.EADock3: Minimizing binding mode 1472, energy is 433.74136, rmsd is 40.67979
sib.fastconf.EADock3: Minimizing binding mode 1473, energy is 433.86954, rmsd is 45.42128
sib.fastconf.EADock3: Minimizing binding mode 1474, energy is 434.23007, rmsd is 45.697453
sib.fastconf.EADock3: Minimizing binding mode 1475, energy is 434.24463, rmsd is 47.307804
sib.fastconf.EADock3: Minimizing binding mode 1476, energy is 434.32394, rmsd is 34.819653
sib.fastconf.EADock3: Minimizing binding mode 1477, energy is 434.51294, rmsd is 64.294266
sib.fastconf.EADock3: Minimizing binding mode 1478, energy is 435.22702, rmsd is 43.28889
sib.fastconf.EADock3: Minimizing binding mode 1479, energy is 435.3569, rmsd is 28.154835
sib.fastconf.EADock3: Minimizing binding mode 1480, energy is 436.81595, rmsd is 41.76945
sib.fastconf.EADock3: Minimizing binding mode 1481, energy is 437.18893, rmsd is 40.62078
sib.fastconf.EADock3: Minimizing binding mode 1482, energy is 437.45425, rmsd is 32.461956
sib.fastconf.EADock3: Minimizing binding mode 1483, energy is 437.70862, rmsd is 51.405106
sib.fastconf.EADock3: Minimizing binding mode 1484, energy is 437.8658, rmsd is 33.834976
sib.fastconf.EADock3: Minimizing binding mode 1485, energy is 438.34317, rmsd is 3.4234157
sib.fastconf.EADock3: Minimizing binding mode 1486, energy is 438.3682, rmsd is 64.31058
sib.fastconf.EADock3: Minimizing binding mode 1487, energy is 438.38016, rmsd is 32.72738
sib.fastconf.EADock3: Minimizing binding mode 1488, energy is 439.3999, rmsd is 66.38051
sib.fastconf.EADock3: Minimizing binding mode 1489, energy is 439.58932, rmsd is 32.777534
sib.fastconf.EADock3: Minimizing binding mode 1490, energy is 439.81616, rmsd is 36.640606
sib.fastconf.EADock3: Minimizing binding mode 1491, energy is 439.97363, rmsd is 12.518293
sib.fastconf.EADock3: Minimizing binding mode 1492, energy is 440.2623, rmsd is 34.793037
sib.fastconf.EADock3: Minimizing binding mode 1493, energy is 440.40393, rmsd is 31.765604
sib.fastconf.EADock3: Minimizing binding mode 1494, energy is 440.5603, rmsd is 44.707535
sib.fastconf.EADock3: Minimizing binding mode 1495, energy is 441.01337, rmsd is 47.13755
sib.fastconf.EADock3: Minimizing binding mode 1496, energy is 441.59702, rmsd is 65.04921
sib.fastconf.EADock3: Minimizing binding mode 1497, energy is 441.71057, rmsd is 2.9440444
sib.fastconf.EADock3: Minimizing binding mode 1498, energy is 442.18332, rmsd is 11.592481
sib.fastconf.EADock3: Minimizing binding mode 1499, energy is 442.19775, rmsd is 2.4315193
sib.fastconf.EADock3: Minimizing binding mode 1500, energy is 442.3298, rmsd is 43.4827
sib.fastconf.EADock3: Minimizing binding mode 1501, energy is 442.62683, rmsd is 45.068943
sib.fastconf.EADock3: Minimizing binding mode 1502, energy is 442.7743, rmsd is 36.962837
sib.fastconf.EADock3: Minimizing binding mode 1503, energy is 443.3529, rmsd is 32.819168
sib.fastconf.EADock3: Minimizing binding mode 1504, energy is 443.9804, rmsd is 64.788055
sib.fastconf.EADock3: Minimizing binding mode 1505, energy is 444.06772, rmsd is 43.6247
sib.fastconf.EADock3: Minimizing binding mode 1506, energy is 444.6887, rmsd is 2.737858
sib.fastconf.EADock3: Minimizing binding mode 1507, energy is 444.90268, rmsd is 35.102493
sib.fastconf.EADock3: Minimizing binding mode 1508, energy is 445.09903, rmsd is 45.68866
sib.fastconf.EADock3: Minimizing binding mode 1509, energy is 445.1049, rmsd is 44.286705
sib.fastconf.EADock3: Minimizing binding mode 1510, energy is 445.38104, rmsd is 35.24289
sib.fastconf.EADock3: Minimizing binding mode 1511, energy is 445.59143, rmsd is 44.106277
sib.fastconf.EADock3: Minimizing binding mode 1512, energy is 445.71173, rmsd is 2.320388
sib.fastconf.EADock3: Minimizing binding mode 1513, energy is 445.82214, rmsd is 42.016525
sib.fastconf.EADock3: Minimizing binding mode 1514, energy is 446.04715, rmsd is 45.150246
sib.fastconf.EADock3: Minimizing binding mode 1515, energy is 446.48428, rmsd is 47.677746
sib.fastconf.EADock3: Minimizing binding mode 1516, energy is 446.5305, rmsd is 45.478195
sib.fastconf.EADock3: Minimizing binding mode 1517, energy is 446.8203, rmsd is 33.22768
sib.fastconf.EADock3: Minimizing binding mode 1518, energy is 447.60474, rmsd is 28.637108
sib.fastconf.EADock3: Minimizing binding mode 1519, energy is 447.8586, rmsd is 41.26577
sib.fastconf.EADock3: Minimizing binding mode 1520, energy is 447.8872, rmsd is 34.785275
sib.fastconf.EADock3: Minimizing binding mode 1521, energy is 448.0553, rmsd is 35.475452
sib.fastconf.EADock3: Minimizing binding mode 1522, energy is 448.85275, rmsd is 30.818789
sib.fastconf.EADock3: Minimizing binding mode 1523, energy is 448.9034, rmsd is 45.336945
sib.fastconf.EADock3: Minimizing binding mode 1524, energy is 449.1781, rmsd is 66.601166
sib.fastconf.EADock3: Minimizing binding mode 1525, energy is 449.41382, rmsd is 11.5822935
sib.fastconf.EADock3: Minimizing binding mode 1526, energy is 449.48587, rmsd is 30.294598
sib.fastconf.EADock3: Minimizing binding mode 1527, energy is 449.566, rmsd is 2.9737082
sib.fastconf.EADock3: Minimizing binding mode 1528, energy is 449.56647, rmsd is 45.78707
sib.fastconf.EADock3: Minimizing binding mode 1529, energy is 450.07324, rmsd is 44.198486
sib.fastconf.EADock3: Minimizing binding mode 1530, energy is 450.34357, rmsd is 37.882957
sib.fastconf.EADock3: Minimizing binding mode 1531, energy is 450.54382, rmsd is 45.13425
sib.fastconf.EADock3: Minimizing binding mode 1532, energy is 450.7458, rmsd is 29.578047
sib.fastconf.EADock3: Minimizing binding mode 1533, energy is 450.909, rmsd is 63.97981
sib.fastconf.EADock3: Minimizing binding mode 1534, energy is 451.32617, rmsd is 9.33191
sib.fastconf.EADock3: Minimizing binding mode 1535, energy is 451.72104, rmsd is 50.83627
sib.fastconf.EADock3: Minimizing binding mode 1536, energy is 451.85962, rmsd is 53.990192
sib.fastconf.EADock3: Minimizing binding mode 1537, energy is 452.122, rmsd is 32.88882
sib.fastconf.EADock3: Minimizing binding mode 1538, energy is 452.54913, rmsd is 42.261635
sib.fastconf.EADock3: Minimizing binding mode 1539, energy is 452.98425, rmsd is 46.558907
sib.fastconf.EADock3: Minimizing binding mode 1540, energy is 453.13773, rmsd is 47.17841
sib.fastconf.EADock3: Minimizing binding mode 1541, energy is 453.39566, rmsd is 10.470387
sib.fastconf.EADock3: Minimizing binding mode 1542, energy is 453.47537, rmsd is 44.928654
sib.fastconf.EADock3: Minimizing binding mode 1543, energy is 453.72314, rmsd is 33.43284
sib.fastconf.EADock3: Minimizing binding mode 1544, energy is 453.855, rmsd is 38.030815
sib.fastconf.EADock3: Minimizing binding mode 1545, energy is 453.99097, rmsd is 39.81281
sib.fastconf.EADock3: Minimizing binding mode 1546, energy is 454.36722, rmsd is 32.203033
sib.fastconf.EADock3: Minimizing binding mode 1547, energy is 454.37286, rmsd is 66.87405
sib.fastconf.EADock3: Minimizing binding mode 1548, energy is 454.8679, rmsd is 64.95715
sib.fastconf.EADock3: Minimizing binding mode 1549, energy is 455.14752, rmsd is 46.640564
sib.fastconf.EADock3: Minimizing binding mode 1550, energy is 456.08817, rmsd is 34.987297
sib.fastconf.EADock3: Minimizing binding mode 1551, energy is 456.92038, rmsd is 31.497328
sib.fastconf.EADock3: Minimizing binding mode 1552, energy is 457.20422, rmsd is 35.648438
sib.fastconf.EADock3: Minimizing binding mode 1553, energy is 457.2387, rmsd is 44.406788
sib.fastconf.EADock3: Minimizing binding mode 1554, energy is 457.48312, rmsd is 12.960779
sib.fastconf.EADock3: Minimizing binding mode 1555, energy is 457.66025, rmsd is 48.066067
sib.fastconf.EADock3: Minimizing binding mode 1556, energy is 458.00345, rmsd is 64.02872
sib.fastconf.EADock3: Minimizing binding mode 1557, energy is 458.15286, rmsd is 33.568153
sib.fastconf.EADock3: Minimizing binding mode 1558, energy is 458.2365, rmsd is 44.013557
sib.fastconf.EADock3: Minimizing binding mode 1559, energy is 458.67642, rmsd is 3.2932544
sib.fastconf.EADock3: Minimizing binding mode 1560, energy is 458.85422, rmsd is 32.466076
sib.fastconf.EADock3: Minimizing binding mode 1561, energy is 459.30014, rmsd is 2.6467645
sib.fastconf.EADock3: Minimizing binding mode 1562, energy is 459.63303, rmsd is 67.2316
sib.fastconf.EADock3: Minimizing binding mode 1563, energy is 460.11685, rmsd is 11.4072895
sib.fastconf.EADock3: Minimizing binding mode 1564, energy is 460.11996, rmsd is 30.895678
sib.fastconf.EADock3: Minimizing binding mode 1565, energy is 460.21674, rmsd is 37.156548
sib.fastconf.EADock3: Minimizing binding mode 1566, energy is 460.895, rmsd is 64.96725
sib.fastconf.EADock3: Minimizing binding mode 1567, energy is 461.09012, rmsd is 55.663
sib.fastconf.EADock3: Minimizing binding mode 1568, energy is 461.3894, rmsd is 30.6097
sib.fastconf.EADock3: Minimizing binding mode 1569, energy is 461.96756, rmsd is 39.878147
sib.fastconf.EADock3: Minimizing binding mode 1570, energy is 461.97403, rmsd is 27.260433
sib.fastconf.EADock3: Minimizing binding mode 1571, energy is 462.10864, rmsd is 1.0510994
sib.fastconf.EADock3: Minimizing binding mode 1572, energy is 462.18677, rmsd is 41.923138
sib.fastconf.EADock3: Minimizing binding mode 1573, energy is 462.33884, rmsd is 21.523464
sib.fastconf.EADock3: Minimizing binding mode 1574, energy is 462.34885, rmsd is 32.275795
sib.fastconf.EADock3: Minimizing binding mode 1575, energy is 462.415, rmsd is 29.337044
sib.fastconf.EADock3: Minimizing binding mode 1576, energy is 462.7214, rmsd is 45.283005
sib.fastconf.EADock3: Minimizing binding mode 1577, energy is 463.19962, rmsd is 66.363625
sib.fastconf.EADock3: Minimizing binding mode 1578, energy is 463.38898, rmsd is 65.04311
sib.fastconf.EADock3: Minimizing binding mode 1579, energy is 464.28918, rmsd is 30.706333
sib.fastconf.EADock3: Minimizing binding mode 1580, energy is 464.71182, rmsd is 42.961224
sib.fastconf.EADock3: Minimizing binding mode 1581, energy is 465.11517, rmsd is 30.224356
sib.fastconf.EADock3: Minimizing binding mode 1582, energy is 465.1372, rmsd is 43.880238
sib.fastconf.EADock3: Minimizing binding mode 1583, energy is 465.4439, rmsd is 38.187645
sib.fastconf.EADock3: Minimizing binding mode 1584, energy is 466.19092, rmsd is 3.3258393
sib.fastconf.EADock3: Minimizing binding mode 1585, energy is 466.19852, rmsd is 37.12377
sib.fastconf.EADock3: Minimizing binding mode 1586, energy is 466.56055, rmsd is 2.0981705
sib.fastconf.EADock3: Minimizing binding mode 1587, energy is 466.58572, rmsd is 33.76752
sib.fastconf.EADock3: Minimizing binding mode 1588, energy is 467.9578, rmsd is 44.71645
sib.fastconf.EADock3: Minimizing binding mode 1589, energy is 468.04993, rmsd is 39.545742
sib.fastconf.EADock3: Minimizing binding mode 1590, energy is 468.27972, rmsd is 42.752266
sib.fastconf.EADock3: Minimizing binding mode 1591, energy is 468.5952, rmsd is 29.984337
sib.fastconf.EADock3: Minimizing binding mode 1592, energy is 468.92337, rmsd is 65.54302
sib.fastconf.EADock3: Minimizing binding mode 1593, energy is 468.9761, rmsd is 43.81312
sib.fastconf.EADock3: Minimizing binding mode 1594, energy is 469.41986, rmsd is 35.47251
sib.fastconf.EADock3: Minimizing binding mode 1595, energy is 469.63092, rmsd is 39.57901
sib.fastconf.EADock3: Minimizing binding mode 1596, energy is 470.6344, rmsd is 42.669193
sib.fastconf.EADock3: Minimizing binding mode 1597, energy is 470.77023, rmsd is 44.01278
sib.fastconf.EADock3: Minimizing binding mode 1598, energy is 471.01346, rmsd is 47.683136
sib.fastconf.EADock3: Minimizing binding mode 1599, energy is 471.02237, rmsd is 2.8214955
sib.fastconf.EADock3: Minimizing binding mode 1600, energy is 471.16046, rmsd is 30.010693
sib.fastconf.EADock3: Minimizing binding mode 1601, energy is 471.21243, rmsd is 39.185295
sib.fastconf.EADock3: Minimizing binding mode 1602, energy is 471.5855, rmsd is 36.296043
sib.fastconf.EADock3: Minimizing binding mode 1603, energy is 471.72125, rmsd is 65.2994
sib.fastconf.EADock3: Minimizing binding mode 1604, energy is 472.1281, rmsd is 31.560772
sib.fastconf.EADock3: Minimizing binding mode 1605, energy is 472.18814, rmsd is 40.289944
sib.fastconf.EADock3: Minimizing binding mode 1606, energy is 472.19946, rmsd is 35.89818
sib.fastconf.EADock3: Minimizing binding mode 1607, energy is 472.6643, rmsd is 33.107296
sib.fastconf.EADock3: Minimizing binding mode 1608, energy is 473.996, rmsd is 30.120712
sib.fastconf.EADock3: Minimizing binding mode 1609, energy is 474.08527, rmsd is 45.40832
sib.fastconf.EADock3: Minimizing binding mode 1610, energy is 474.44815, rmsd is 42.811344
sib.fastconf.EADock3: Minimizing binding mode 1611, energy is 474.8626, rmsd is 30.567505
sib.fastconf.EADock3: Minimizing binding mode 1612, energy is 474.91782, rmsd is 11.863206
sib.fastconf.EADock3: Minimizing binding mode 1613, energy is 474.9874, rmsd is 43.52603
sib.fastconf.EADock3: Minimizing binding mode 1614, energy is 475.178, rmsd is 65.25126
sib.fastconf.EADock3: Minimizing binding mode 1615, energy is 475.2287, rmsd is 35.46748
sib.fastconf.EADock3: Minimizing binding mode 1616, energy is 475.27097, rmsd is 65.01985
sib.fastconf.EADock3: Minimizing binding mode 1617, energy is 475.31906, rmsd is 54.690598
sib.fastconf.EADock3: Minimizing binding mode 1618, energy is 476.30344, rmsd is 43.11159
sib.fastconf.EADock3: Minimizing binding mode 1619, energy is 476.3654, rmsd is 32.664646
sib.fastconf.EADock3: Minimizing binding mode 1620, energy is 476.64526, rmsd is 35.31516
sib.fastconf.EADock3: Minimizing binding mode 1621, energy is 477.0503, rmsd is 2.4555206
sib.fastconf.EADock3: Minimizing binding mode 1622, energy is 477.85025, rmsd is 41.70735
sib.fastconf.EADock3: Minimizing binding mode 1623, energy is 478.18906, rmsd is 35.959652
sib.fastconf.EADock3: Minimizing binding mode 1624, energy is 478.3865, rmsd is 47.84628
sib.fastconf.EADock3: Minimizing binding mode 1625, energy is 478.78387, rmsd is 11.490326
sib.fastconf.EADock3: Minimizing binding mode 1626, energy is 478.79666, rmsd is 2.2942054
sib.fastconf.EADock3: Minimizing binding mode 1627, energy is 479.37396, rmsd is 46.141388
sib.fastconf.EADock3: Minimizing binding mode 1628, energy is 479.48245, rmsd is 42.494602
sib.fastconf.EADock3: Minimizing binding mode 1629, energy is 479.5166, rmsd is 30.819607
sib.fastconf.EADock3: Minimizing binding mode 1630, energy is 479.5302, rmsd is 44.826298
sib.fastconf.EADock3: Minimizing binding mode 1631, energy is 479.55344, rmsd is 54.57058
sib.fastconf.EADock3: Minimizing binding mode 1632, energy is 479.7443, rmsd is 13.485514
sib.fastconf.EADock3: Minimizing binding mode 1633, energy is 479.76733, rmsd is 45.396572
sib.fastconf.EADock3: Minimizing binding mode 1634, energy is 479.94244, rmsd is 34.247963
sib.fastconf.EADock3: Minimizing binding mode 1635, energy is 480.2983, rmsd is 31.799202
sib.fastconf.EADock3: Minimizing binding mode 1636, energy is 480.3328, rmsd is 33.234844
sib.fastconf.EADock3: Minimizing binding mode 1637, energy is 480.36566, rmsd is 41.134907
sib.fastconf.EADock3: Minimizing binding mode 1638, energy is 480.5345, rmsd is 42.520176
sib.fastconf.EADock3: Minimizing binding mode 1639, energy is 481.2703, rmsd is 40.679802
sib.fastconf.EADock3: Minimizing binding mode 1640, energy is 481.4103, rmsd is 42.865314
sib.fastconf.EADock3: Minimizing binding mode 1641, energy is 481.5695, rmsd is 46.084858
sib.fastconf.EADock3: Minimizing binding mode 1642, energy is 481.6154, rmsd is 66.55202
sib.fastconf.EADock3: Minimizing binding mode 1643, energy is 481.73703, rmsd is 66.27963
sib.fastconf.EADock3: Minimizing binding mode 1644, energy is 481.7913, rmsd is 40.319366
sib.fastconf.EADock3: Minimizing binding mode 1645, energy is 482.0669, rmsd is 39.931934
sib.fastconf.EADock3: Minimizing binding mode 1646, energy is 482.414, rmsd is 39.9861
sib.fastconf.EADock3: Minimizing binding mode 1647, energy is 482.98666, rmsd is 43.500885
sib.fastconf.EADock3: Minimizing binding mode 1648, energy is 483.29312, rmsd is 39.40246
sib.fastconf.EADock3: Minimizing binding mode 1649, energy is 483.5363, rmsd is 33.06456
sib.fastconf.EADock3: Minimizing binding mode 1650, energy is 483.58414, rmsd is 1.9226296
sib.fastconf.EADock3: Minimizing binding mode 1651, energy is 483.65613, rmsd is 3.111205
sib.fastconf.EADock3: Minimizing binding mode 1652, energy is 483.7601, rmsd is 51.632328
sib.fastconf.EADock3: Minimizing binding mode 1653, energy is 483.81982, rmsd is 35.841484
sib.fastconf.EADock3: Minimizing binding mode 1654, energy is 484.11737, rmsd is 45.362133
sib.fastconf.EADock3: Minimizing binding mode 1655, energy is 484.71783, rmsd is 30.231737
sib.fastconf.EADock3: Minimizing binding mode 1656, energy is 484.72574, rmsd is 36.32776
sib.fastconf.EADock3: Minimizing binding mode 1657, energy is 485.66635, rmsd is 3.5438526
sib.fastconf.EADock3: Minimizing binding mode 1658, energy is 486.42563, rmsd is 46.462704
sib.fastconf.EADock3: Minimizing binding mode 1659, energy is 486.48065, rmsd is 32.36294
sib.fastconf.EADock3: Minimizing binding mode 1660, energy is 486.59113, rmsd is 13.529796
sib.fastconf.EADock3: Minimizing binding mode 1661, energy is 487.04028, rmsd is 45.54613
sib.fastconf.EADock3: Minimizing binding mode 1662, energy is 487.17285, rmsd is 11.536972
sib.fastconf.EADock3: Minimizing binding mode 1663, energy is 487.34692, rmsd is 42.358982
sib.fastconf.EADock3: Minimizing binding mode 1664, energy is 487.82922, rmsd is 35.691246
sib.fastconf.EADock3: Minimizing binding mode 1665, energy is 488.35263, rmsd is 29.738972
sib.fastconf.EADock3: Minimizing binding mode 1666, energy is 488.60376, rmsd is 38.212868
sib.fastconf.EADock3: Minimizing binding mode 1667, energy is 489.06464, rmsd is 43.73919
sib.fastconf.EADock3: Minimizing binding mode 1668, energy is 489.181, rmsd is 12.000944
sib.fastconf.EADock3: Minimizing binding mode 1669, energy is 489.63272, rmsd is 10.324652
sib.fastconf.EADock3: Minimizing binding mode 1670, energy is 490.65402, rmsd is 3.0174298
sib.fastconf.EADock3: Minimizing binding mode 1671, energy is 490.97995, rmsd is 41.326534
sib.fastconf.EADock3: Minimizing binding mode 1672, energy is 491.0791, rmsd is 17.0187
sib.fastconf.EADock3: Minimizing binding mode 1673, energy is 491.22943, rmsd is 11.813902
sib.fastconf.EADock3: Minimizing binding mode 1674, energy is 491.46777, rmsd is 30.3612
sib.fastconf.EADock3: Minimizing binding mode 1675, energy is 491.96545, rmsd is 2.517596
sib.fastconf.EADock3: Minimizing binding mode 1676, energy is 492.0492, rmsd is 30.577965
sib.fastconf.EADock3: Minimizing binding mode 1677, energy is 492.0632, rmsd is 64.35242
sib.fastconf.EADock3: Minimizing binding mode 1678, energy is 492.81424, rmsd is 38.934597
sib.fastconf.EADock3: Minimizing binding mode 1679, energy is 492.88916, rmsd is 43.642937
sib.fastconf.EADock3: Minimizing binding mode 1680, energy is 492.94537, rmsd is 36.428215
sib.fastconf.EADock3: Minimizing binding mode 1681, energy is 493.04578, rmsd is 45.806812
sib.fastconf.EADock3: Minimizing binding mode 1682, energy is 494.17892, rmsd is 45.26876
sib.fastconf.EADock3: Minimizing binding mode 1683, energy is 495.3797, rmsd is 2.3882353
sib.fastconf.EADock3: Minimizing binding mode 1684, energy is 495.5259, rmsd is 34.809937
sib.fastconf.EADock3: Minimizing binding mode 1685, energy is 495.83804, rmsd is 33.539555
sib.fastconf.EADock3: Minimizing binding mode 1686, energy is 496.3627, rmsd is 46.02721
sib.fastconf.EADock3: Minimizing binding mode 1687, energy is 496.3818, rmsd is 66.304016
sib.fastconf.EADock3: Minimizing binding mode 1688, energy is 496.66516, rmsd is 40.079613
sib.fastconf.EADock3: Minimizing binding mode 1689, energy is 496.94836, rmsd is 3.6834178
sib.fastconf.EADock3: Minimizing binding mode 1690, energy is 497.0118, rmsd is 42.495407
sib.fastconf.EADock3: Minimizing binding mode 1691, energy is 497.2227, rmsd is 45.02278
sib.fastconf.EADock3: Minimizing binding mode 1692, energy is 498.54108, rmsd is 39.423073
sib.fastconf.EADock3: Minimizing binding mode 1693, energy is 498.5974, rmsd is 3.0988686
sib.fastconf.EADock3: Minimizing binding mode 1694, energy is 499.03497, rmsd is 43.441925
sib.fastconf.EADock3: Minimizing binding mode 1695, energy is 499.2143, rmsd is 32.48324
sib.fastconf.EADock3: Minimizing binding mode 1696, energy is 499.49484, rmsd is 29.95575
sib.fastconf.EADock3: Minimizing binding mode 1697, energy is 500.08844, rmsd is 30.604137
sib.fastconf.EADock3: Minimizing binding mode 1698, energy is 500.11176, rmsd is 45.63873
sib.fastconf.EADock3: Minimizing binding mode 1699, energy is 500.5193, rmsd is 3.4005785
sib.fastconf.EADock3: Minimizing binding mode 1700, energy is 501.08368, rmsd is 32.005836
sib.fastconf.EADock3: Minimizing binding mode 1701, energy is 501.17554, rmsd is 65.93732
sib.fastconf.EADock3: Minimizing binding mode 1702, energy is 501.57367, rmsd is 59.849525
sib.fastconf.EADock3: Minimizing binding mode 1703, energy is 501.5752, rmsd is 44.3655
sib.fastconf.EADock3: Minimizing binding mode 1704, energy is 502.89948, rmsd is 40.888786
sib.fastconf.EADock3: Minimizing binding mode 1705, energy is 503.0663, rmsd is 37.0745
sib.fastconf.EADock3: Minimizing binding mode 1706, energy is 503.4467, rmsd is 8.967408
sib.fastconf.EADock3: Minimizing binding mode 1707, energy is 503.55783, rmsd is 38.268265
sib.fastconf.EADock3: Minimizing binding mode 1708, energy is 503.76553, rmsd is 44.563614
sib.fastconf.EADock3: Minimizing binding mode 1709, energy is 503.79413, rmsd is 46.338387
sib.fastconf.EADock3: Minimizing binding mode 1710, energy is 504.26086, rmsd is 36.564106
sib.fastconf.EADock3: Minimizing binding mode 1711, energy is 504.3869, rmsd is 31.149395
sib.fastconf.EADock3: Minimizing binding mode 1712, energy is 504.59702, rmsd is 14.497006
sib.fastconf.EADock3: Minimizing binding mode 1713, energy is 504.9438, rmsd is 9.733311
sib.fastconf.EADock3: Minimizing binding mode 1714, energy is 505.7652, rmsd is 44.398502
sib.fastconf.EADock3: Minimizing binding mode 1715, energy is 506.74387, rmsd is 45.250957
sib.fastconf.EADock3: Minimizing binding mode 1716, energy is 506.97824, rmsd is 10.764272
sib.fastconf.EADock3: Minimizing binding mode 1717, energy is 507.11203, rmsd is 39.559006
sib.fastconf.EADock3: Minimizing binding mode 1718, energy is 507.68567, rmsd is 42.595325
sib.fastconf.EADock3: Minimizing binding mode 1719, energy is 507.78696, rmsd is 41.740868
sib.fastconf.EADock3: Minimizing binding mode 1720, energy is 507.8208, rmsd is 11.120617
sib.fastconf.EADock3: Minimizing binding mode 1721, energy is 507.82117, rmsd is 10.693363
sib.fastconf.EADock3: Minimizing binding mode 1722, energy is 508.32568, rmsd is 31.036478
sib.fastconf.EADock3: Minimizing binding mode 1723, energy is 508.72354, rmsd is 39.28513
sib.fastconf.EADock3: Minimizing binding mode 1724, energy is 508.74817, rmsd is 35.003605
sib.fastconf.EADock3: Minimizing binding mode 1725, energy is 509.17493, rmsd is 29.69444
sib.fastconf.EADock3: Minimizing binding mode 1726, energy is 509.48242, rmsd is 32.087517
sib.fastconf.EADock3: Minimizing binding mode 1727, energy is 509.90512, rmsd is 31.214197
sib.fastconf.EADock3: Minimizing binding mode 1728, energy is 510.16144, rmsd is 33.36847
sib.fastconf.EADock3: Minimizing binding mode 1729, energy is 510.34604, rmsd is 31.502594
sib.fastconf.EADock3: Minimizing binding mode 1730, energy is 510.4601, rmsd is 11.486734
sib.fastconf.EADock3: Minimizing binding mode 1731, energy is 510.47104, rmsd is 12.635535
sib.fastconf.EADock3: Minimizing binding mode 1732, energy is 510.89923, rmsd is 2.328308
sib.fastconf.EADock3: Minimizing binding mode 1733, energy is 511.198, rmsd is 30.727976
sib.fastconf.EADock3: Minimizing binding mode 1734, energy is 511.23898, rmsd is 55.061234
sib.fastconf.EADock3: Minimizing binding mode 1735, energy is 511.47305, rmsd is 31.087152
sib.fastconf.EADock3: Minimizing binding mode 1736, energy is 511.73914, rmsd is 36.019924
sib.fastconf.EADock3: Minimizing binding mode 1737, energy is 511.83127, rmsd is 40.712868
sib.fastconf.EADock3: Minimizing binding mode 1738, energy is 512.4891, rmsd is 42.93088
sib.fastconf.EADock3: Minimizing binding mode 1739, energy is 513.6465, rmsd is 32.51229
sib.fastconf.EADock3: Minimizing binding mode 1740, energy is 514.15295, rmsd is 11.549309
sib.fastconf.EADock3: Minimizing binding mode 1741, energy is 514.20526, rmsd is 38.776318
sib.fastconf.EADock3: Minimizing binding mode 1742, energy is 514.909, rmsd is 36.92174
sib.fastconf.EADock3: Minimizing binding mode 1743, energy is 514.9692, rmsd is 64.757835
sib.fastconf.EADock3: Minimizing binding mode 1744, energy is 515.00793, rmsd is 31.575567
sib.fastconf.EADock3: Minimizing binding mode 1745, energy is 515.1383, rmsd is 31.854269
sib.fastconf.EADock3: Minimizing binding mode 1746, energy is 515.57074, rmsd is 46.93303
sib.fastconf.EADock3: Minimizing binding mode 1747, energy is 516.8801, rmsd is 36.956715
sib.fastconf.EADock3: Minimizing binding mode 1748, energy is 516.95825, rmsd is 12.294057
sib.fastconf.EADock3: Minimizing binding mode 1749, energy is 517.305, rmsd is 13.156579
sib.fastconf.EADock3: Minimizing binding mode 1750, energy is 517.32465, rmsd is 29.11816
sib.fastconf.EADock3: Minimizing binding mode 1751, energy is 517.6454, rmsd is 44.186172
sib.fastconf.EADock3: Minimizing binding mode 1752, energy is 518.49854, rmsd is 51.604946
sib.fastconf.EADock3: Minimizing binding mode 1753, energy is 519.2331, rmsd is 31.087246
sib.fastconf.EADock3: Minimizing binding mode 1754, energy is 520.025, rmsd is 45.599007
sib.fastconf.EADock3: Minimizing binding mode 1755, energy is 520.3252, rmsd is 48.353405
sib.fastconf.EADock3: Minimizing binding mode 1756, energy is 520.4341, rmsd is 33.279198
sib.fastconf.EADock3: Minimizing binding mode 1757, energy is 520.85944, rmsd is 32.24943
sib.fastconf.EADock3: Minimizing binding mode 1758, energy is 521.55646, rmsd is 32.711838
sib.fastconf.EADock3: Minimizing binding mode 1759, energy is 522.1867, rmsd is 41.539925
sib.fastconf.EADock3: Minimizing binding mode 1760, energy is 522.95795, rmsd is 27.570099
sib.fastconf.EADock3: Minimizing binding mode 1761, energy is 523.2269, rmsd is 36.240715
sib.fastconf.EADock3: Minimizing binding mode 1762, energy is 523.37946, rmsd is 43.749928
sib.fastconf.EADock3: Minimizing binding mode 1763, energy is 523.56854, rmsd is 52.32334
sib.fastconf.EADock3: Minimizing binding mode 1764, energy is 523.6466, rmsd is 46.96953
sib.fastconf.EADock3: Minimizing binding mode 1765, energy is 523.74976, rmsd is 13.239147
sib.fastconf.EADock3: Minimizing binding mode 1766, energy is 524.53534, rmsd is 2.8492415
sib.fastconf.EADock3: Minimizing binding mode 1767, energy is 525.033, rmsd is 38.28675
sib.fastconf.EADock3: Minimizing binding mode 1768, energy is 525.4264, rmsd is 2.8256314
sib.fastconf.EADock3: Minimizing binding mode 1769, energy is 525.6095, rmsd is 45.7233
sib.fastconf.EADock3: Minimizing binding mode 1770, energy is 525.95966, rmsd is 12.289135
sib.fastconf.EADock3: Minimizing binding mode 1771, energy is 526.0136, rmsd is 43.00726
sib.fastconf.EADock3: Minimizing binding mode 1772, energy is 526.1456, rmsd is 52.829483
sib.fastconf.EADock3: Minimizing binding mode 1773, energy is 526.3895, rmsd is 10.465967
sib.fastconf.EADock3: Minimizing binding mode 1774, energy is 527.26965, rmsd is 33.56002
sib.fastconf.EADock3: Minimizing binding mode 1775, energy is 527.415, rmsd is 42.090317
sib.fastconf.EADock3: Minimizing binding mode 1776, energy is 527.8001, rmsd is 42.24496
sib.fastconf.EADock3: Minimizing binding mode 1777, energy is 528.58185, rmsd is 40.85966
sib.fastconf.EADock3: Minimizing binding mode 1778, energy is 529.9329, rmsd is 39.885967
sib.fastconf.EADock3: Minimizing binding mode 1779, energy is 530.0163, rmsd is 33.31686
sib.fastconf.EADock3: Minimizing binding mode 1780, energy is 530.133, rmsd is 28.912292
sib.fastconf.EADock3: Minimizing binding mode 1781, energy is 530.9327, rmsd is 29.62942
sib.fastconf.EADock3: Minimizing binding mode 1782, energy is 531.4192, rmsd is 47.669765
sib.fastconf.EADock3: Minimizing binding mode 1783, energy is 531.4822, rmsd is 29.527897
sib.fastconf.EADock3: Minimizing binding mode 1784, energy is 531.8116, rmsd is 2.1323056
sib.fastconf.EADock3: Minimizing binding mode 1785, energy is 532.5289, rmsd is 37.693405
sib.fastconf.EADock3: Minimizing binding mode 1786, energy is 533.3561, rmsd is 30.904476
sib.fastconf.EADock3: Minimizing binding mode 1787, energy is 533.4247, rmsd is 33.52082
sib.fastconf.EADock3: Minimizing binding mode 1788, energy is 534.43896, rmsd is 44.813423
sib.fastconf.EADock3: Minimizing binding mode 1789, energy is 534.47797, rmsd is 31.71411
sib.fastconf.EADock3: Minimizing binding mode 1790, energy is 534.7407, rmsd is 45.878963
sib.fastconf.EADock3: Minimizing binding mode 1791, energy is 535.3384, rmsd is 46.090775
sib.fastconf.EADock3: Minimizing binding mode 1792, energy is 536.4191, rmsd is 40.16964
sib.fastconf.EADock3: Minimizing binding mode 1793, energy is 536.8431, rmsd is 64.59647
sib.fastconf.EADock3: Minimizing binding mode 1794, energy is 536.97253, rmsd is 2.7170563
sib.fastconf.EADock3: Minimizing binding mode 1795, energy is 537.2449, rmsd is 33.054993
sib.fastconf.EADock3: Minimizing binding mode 1796, energy is 538.3163, rmsd is 34.551437
sib.fastconf.EADock3: Minimizing binding mode 1797, energy is 539.1691, rmsd is 64.86588
sib.fastconf.EADock3: Minimizing binding mode 1798, energy is 539.20074, rmsd is 32.430668
sib.fastconf.EADock3: Minimizing binding mode 1799, energy is 539.26953, rmsd is 32.914253
sib.fastconf.EADock3: Minimizing binding mode 1800, energy is 539.73535, rmsd is 39.14832
sib.fastconf.EADock3: Minimizing binding mode 1801, energy is 540.3019, rmsd is 55.699818
sib.fastconf.EADock3: Minimizing binding mode 1802, energy is 541.04974, rmsd is 45.934956
sib.fastconf.EADock3: Minimizing binding mode 1803, energy is 541.3216, rmsd is 64.29475
sib.fastconf.EADock3: Minimizing binding mode 1804, energy is 541.496, rmsd is 43.481632
sib.fastconf.EADock3: Minimizing binding mode 1805, energy is 541.6439, rmsd is 42.48468
sib.fastconf.EADock3: Minimizing binding mode 1806, energy is 541.65625, rmsd is 30.806925
sib.fastconf.EADock3: Minimizing binding mode 1807, energy is 541.6593, rmsd is 39.425568
sib.fastconf.EADock3: Minimizing binding mode 1808, energy is 541.8633, rmsd is 45.169567
sib.fastconf.EADock3: Minimizing binding mode 1809, energy is 542.35895, rmsd is 32.892933
sib.fastconf.EADock3: Minimizing binding mode 1810, energy is 543.0247, rmsd is 34.94237
sib.fastconf.EADock3: Minimizing binding mode 1811, energy is 543.08716, rmsd is 30.448626
sib.fastconf.EADock3: Minimizing binding mode 1812, energy is 543.3271, rmsd is 1.5769593
sib.fastconf.EADock3: Minimizing binding mode 1813, energy is 543.38196, rmsd is 39.13764
sib.fastconf.EADock3: Minimizing binding mode 1814, energy is 543.4139, rmsd is 32.151577
sib.fastconf.EADock3: Minimizing binding mode 1815, energy is 544.1879, rmsd is 31.465244
sib.fastconf.EADock3: Minimizing binding mode 1816, energy is 544.4638, rmsd is 45.901524
sib.fastconf.EADock3: Minimizing binding mode 1817, energy is 544.48706, rmsd is 67.15806
sib.fastconf.EADock3: Minimizing binding mode 1818, energy is 544.68945, rmsd is 12.268851
sib.fastconf.EADock3: Minimizing binding mode 1819, energy is 545.1248, rmsd is 40.710033
sib.fastconf.EADock3: Minimizing binding mode 1820, energy is 545.44257, rmsd is 43.84561
sib.fastconf.EADock3: Minimizing binding mode 1821, energy is 546.06213, rmsd is 64.912994
sib.fastconf.EADock3: Minimizing binding mode 1822, energy is 546.6642, rmsd is 35.064064
sib.fastconf.EADock3: Minimizing binding mode 1823, energy is 546.8907, rmsd is 35.681396
sib.fastconf.EADock3: Minimizing binding mode 1824, energy is 547.1069, rmsd is 43.960415
sib.fastconf.EADock3: Minimizing binding mode 1825, energy is 547.211, rmsd is 39.525295
sib.fastconf.EADock3: Minimizing binding mode 1826, energy is 547.22986, rmsd is 9.69177
sib.fastconf.EADock3: Minimizing binding mode 1827, energy is 548.39026, rmsd is 13.265206
sib.fastconf.EADock3: Minimizing binding mode 1828, energy is 548.95044, rmsd is 10.831764
sib.fastconf.EADock3: Minimizing binding mode 1829, energy is 550.3038, rmsd is 2.4656858
sib.fastconf.EADock3: Minimizing binding mode 1830, energy is 550.4112, rmsd is 2.6971915
sib.fastconf.EADock3: Minimizing binding mode 1831, energy is 550.7542, rmsd is 43.03337
sib.fastconf.EADock3: Minimizing binding mode 1832, energy is 551.4342, rmsd is 11.024863
sib.fastconf.EADock3: Minimizing binding mode 1833, energy is 551.5248, rmsd is 11.047074
sib.fastconf.EADock3: Minimizing binding mode 1834, energy is 552.42163, rmsd is 48.052395
sib.fastconf.EADock3: Minimizing binding mode 1835, energy is 552.859, rmsd is 39.13539
sib.fastconf.EADock3: Minimizing binding mode 1836, energy is 553.0153, rmsd is 12.077401
sib.fastconf.EADock3: Minimizing binding mode 1837, energy is 553.255, rmsd is 39.27479
sib.fastconf.EADock3: Minimizing binding mode 1838, energy is 553.5373, rmsd is 46.189205
sib.fastconf.EADock3: Minimizing binding mode 1839, energy is 554.0085, rmsd is 41.297104
sib.fastconf.EADock3: Minimizing binding mode 1840, energy is 554.09283, rmsd is 33.796234
sib.fastconf.EADock3: Minimizing binding mode 1841, energy is 554.1377, rmsd is 67.53162
sib.fastconf.EADock3: Minimizing binding mode 1842, energy is 554.7654, rmsd is 43.37056
sib.fastconf.EADock3: Minimizing binding mode 1843, energy is 555.14386, rmsd is 37.894604
sib.fastconf.EADock3: Minimizing binding mode 1844, energy is 555.1519, rmsd is 13.281383
sib.fastconf.EADock3: Minimizing binding mode 1845, energy is 555.2014, rmsd is 30.696238
sib.fastconf.EADock3: Minimizing binding mode 1846, energy is 555.8246, rmsd is 45.321487
sib.fastconf.EADock3: Minimizing binding mode 1847, energy is 556.09344, rmsd is 11.957904
sib.fastconf.EADock3: Minimizing binding mode 1848, energy is 556.25226, rmsd is 33.7753
sib.fastconf.EADock3: Minimizing binding mode 1849, energy is 556.47046, rmsd is 48.62043
sib.fastconf.EADock3: Minimizing binding mode 1850, energy is 556.5754, rmsd is 42.428604
sib.fastconf.EADock3: Minimizing binding mode 1851, energy is 556.7204, rmsd is 38.774494
sib.fastconf.EADock3: Minimizing binding mode 1852, energy is 559.16583, rmsd is 43.873405
sib.fastconf.EADock3: Minimizing binding mode 1853, energy is 559.37506, rmsd is 13.250548
sib.fastconf.EADock3: Minimizing binding mode 1854, energy is 559.6266, rmsd is 48.895428
sib.fastconf.EADock3: Minimizing binding mode 1855, energy is 560.0532, rmsd is 28.09698
sib.fastconf.EADock3: Minimizing binding mode 1856, energy is 560.4446, rmsd is 40.500725
sib.fastconf.EADock3: Minimizing binding mode 1857, energy is 560.8372, rmsd is 30.903652
sib.fastconf.EADock3: Minimizing binding mode 1858, energy is 560.8454, rmsd is 3.4010515
sib.fastconf.EADock3: Minimizing binding mode 1859, energy is 561.5188, rmsd is 45.848774
sib.fastconf.EADock3: Minimizing binding mode 1860, energy is 561.8399, rmsd is 13.687154
sib.fastconf.EADock3: Minimizing binding mode 1861, energy is 562.736, rmsd is 10.9720545
sib.fastconf.EADock3: Minimizing binding mode 1862, energy is 562.9845, rmsd is 41.957348
sib.fastconf.EADock3: Minimizing binding mode 1863, energy is 563.09784, rmsd is 41.374783
sib.fastconf.EADock3: Minimizing binding mode 1864, energy is 563.32806, rmsd is 29.503336
sib.fastconf.EADock3: Minimizing binding mode 1865, energy is 564.1279, rmsd is 2.229736
sib.fastconf.EADock3: Minimizing binding mode 1866, energy is 565.0282, rmsd is 41.759895
sib.fastconf.EADock3: Minimizing binding mode 1867, energy is 565.3625, rmsd is 41.53143
sib.fastconf.EADock3: Minimizing binding mode 1868, energy is 565.534, rmsd is 46.119545
sib.fastconf.EADock3: Minimizing binding mode 1869, energy is 565.7328, rmsd is 37.853092
sib.fastconf.EADock3: Minimizing binding mode 1870, energy is 565.7897, rmsd is 41.397564
sib.fastconf.EADock3: Minimizing binding mode 1871, energy is 566.78876, rmsd is 30.362633
sib.fastconf.EADock3: Minimizing binding mode 1872, energy is 567.0124, rmsd is 2.933454
sib.fastconf.EADock3: Minimizing binding mode 1873, energy is 567.3252, rmsd is 33.043663
sib.fastconf.EADock3: Minimizing binding mode 1874, energy is 567.5554, rmsd is 40.93621
sib.fastconf.EADock3: Minimizing binding mode 1875, energy is 567.86536, rmsd is 1.5874099
sib.fastconf.EADock3: Minimizing binding mode 1876, energy is 568.2057, rmsd is 34.9119
sib.fastconf.EADock3: Minimizing binding mode 1877, energy is 569.1321, rmsd is 43.989162
sib.fastconf.EADock3: Minimizing binding mode 1878, energy is 569.31635, rmsd is 31.538431
sib.fastconf.EADock3: Minimizing binding mode 1879, energy is 569.5696, rmsd is 30.735975
sib.fastconf.EADock3: Minimizing binding mode 1880, energy is 570.07214, rmsd is 44.882935
sib.fastconf.EADock3: Minimizing binding mode 1881, energy is 570.14166, rmsd is 44.535286
sib.fastconf.EADock3: Minimizing binding mode 1882, energy is 570.8439, rmsd is 66.49753
sib.fastconf.EADock3: Minimizing binding mode 1883, energy is 571.4286, rmsd is 2.065354
sib.fastconf.EADock3: Minimizing binding mode 1884, energy is 571.5448, rmsd is 29.847534
sib.fastconf.EADock3: Minimizing binding mode 1885, energy is 571.791, rmsd is 31.84249
sib.fastconf.EADock3: Minimizing binding mode 1886, energy is 572.71484, rmsd is 38.526497
sib.fastconf.EADock3: Minimizing binding mode 1887, energy is 573.44836, rmsd is 41.50042
sib.fastconf.EADock3: Minimizing binding mode 1888, energy is 573.6442, rmsd is 1.8929992
sib.fastconf.EADock3: Minimizing binding mode 1889, energy is 573.97833, rmsd is 29.564127
sib.fastconf.EADock3: Minimizing binding mode 1890, energy is 574.1298, rmsd is 32.029957
sib.fastconf.EADock3: Minimizing binding mode 1891, energy is 574.51575, rmsd is 34.16881
sib.fastconf.EADock3: Minimizing binding mode 1892, energy is 574.933, rmsd is 34.153954
sib.fastconf.EADock3: Minimizing binding mode 1893, energy is 575.8767, rmsd is 42.865417
sib.fastconf.EADock3: Minimizing binding mode 1894, energy is 576.00275, rmsd is 34.49888
sib.fastconf.EADock3: Minimizing binding mode 1895, energy is 576.1646, rmsd is 38.596264
sib.fastconf.EADock3: Minimizing binding mode 1896, energy is 577.13214, rmsd is 63.974796
sib.fastconf.EADock3: Minimizing binding mode 1897, energy is 577.37317, rmsd is 31.109951
sib.fastconf.EADock3: Minimizing binding mode 1898, energy is 577.78314, rmsd is 39.27024
sib.fastconf.EADock3: Minimizing binding mode 1899, energy is 577.99274, rmsd is 2.3566277
sib.fastconf.EADock3: Minimizing binding mode 1900, energy is 578.1789, rmsd is 31.535788
sib.fastconf.EADock3: Minimizing binding mode 1901, energy is 578.19025, rmsd is 47.834423
sib.fastconf.EADock3: Minimizing binding mode 1902, energy is 578.41174, rmsd is 3.4678574
sib.fastconf.EADock3: Minimizing binding mode 1903, energy is 578.43054, rmsd is 45.124424
sib.fastconf.EADock3: Minimizing binding mode 1904, energy is 578.7622, rmsd is 43.29207
sib.fastconf.EADock3: Minimizing binding mode 1905, energy is 578.8338, rmsd is 48.03571
sib.fastconf.EADock3: Minimizing binding mode 1906, energy is 579.8305, rmsd is 40.900288
sib.fastconf.EADock3: Minimizing binding mode 1907, energy is 579.9216, rmsd is 3.3858826
sib.fastconf.EADock3: Minimizing binding mode 1908, energy is 580.148, rmsd is 31.979387
sib.fastconf.EADock3: Minimizing binding mode 1909, energy is 580.9192, rmsd is 30.144392
sib.fastconf.EADock3: Minimizing binding mode 1910, energy is 581.8251, rmsd is 1.0333205
sib.fastconf.EADock3: Minimizing binding mode 1911, energy is 581.99524, rmsd is 3.2169778
sib.fastconf.EADock3: Minimizing binding mode 1912, energy is 582.12115, rmsd is 11.585981
sib.fastconf.EADock3: Minimizing binding mode 1913, energy is 582.34406, rmsd is 30.804018
sib.fastconf.EADock3: Minimizing binding mode 1914, energy is 582.5752, rmsd is 48.08684
sib.fastconf.EADock3: Minimizing binding mode 1915, energy is 582.83295, rmsd is 1.1989994
sib.fastconf.EADock3: Minimizing binding mode 1916, energy is 583.1612, rmsd is 29.35168
sib.fastconf.EADock3: Minimizing binding mode 1917, energy is 583.6395, rmsd is 36.98583
sib.fastconf.EADock3: Minimizing binding mode 1918, energy is 584.0254, rmsd is 54.048042
sib.fastconf.EADock3: Minimizing binding mode 1919, energy is 584.14453, rmsd is 44.1979
sib.fastconf.EADock3: Minimizing binding mode 1920, energy is 584.68726, rmsd is 40.65378
sib.fastconf.EADock3: Minimizing binding mode 1921, energy is 584.83215, rmsd is 65.00681
sib.fastconf.EADock3: Minimizing binding mode 1922, energy is 585.3477, rmsd is 32.47354
sib.fastconf.EADock3: Minimizing binding mode 1923, energy is 585.39014, rmsd is 9.315812
sib.fastconf.EADock3: Minimizing binding mode 1924, energy is 585.44885, rmsd is 64.53182
sib.fastconf.EADock3: Minimizing binding mode 1925, energy is 585.9516, rmsd is 43.60652
sib.fastconf.EADock3: Minimizing binding mode 1926, energy is 586.01544, rmsd is 35.494137
sib.fastconf.EADock3: Minimizing binding mode 1927, energy is 586.4621, rmsd is 45.940212
sib.fastconf.EADock3: Minimizing binding mode 1928, energy is 586.4649, rmsd is 21.55313
sib.fastconf.EADock3: Minimizing binding mode 1929, energy is 586.5419, rmsd is 33.889534
sib.fastconf.EADock3: Minimizing binding mode 1930, energy is 586.5894, rmsd is 11.920877
sib.fastconf.EADock3: Minimizing binding mode 1931, energy is 586.59235, rmsd is 43.83199
sib.fastconf.EADock3: Minimizing binding mode 1932, energy is 586.73346, rmsd is 35.5561
sib.fastconf.EADock3: Minimizing binding mode 1933, energy is 586.9312, rmsd is 11.241816
sib.fastconf.EADock3: Minimizing binding mode 1934, energy is 587.0417, rmsd is 12.805206
sib.fastconf.EADock3: Minimizing binding mode 1935, energy is 587.8349, rmsd is 31.412073
sib.fastconf.EADock3: Minimizing binding mode 1936, energy is 587.8489, rmsd is 2.7101328
sib.fastconf.EADock3: Minimizing binding mode 1937, energy is 588.5196, rmsd is 47.767803
sib.fastconf.EADock3: Minimizing binding mode 1938, energy is 588.683, rmsd is 38.976276
sib.fastconf.EADock3: Minimizing binding mode 1939, energy is 589.5311, rmsd is 32.011456
sib.fastconf.EADock3: Minimizing binding mode 1940, energy is 589.65076, rmsd is 2.1167095
sib.fastconf.EADock3: Minimizing binding mode 1941, energy is 590.3775, rmsd is 43.22504
sib.fastconf.EADock3: Minimizing binding mode 1942, energy is 590.3914, rmsd is 34.625954
sib.fastconf.EADock3: Minimizing binding mode 1943, energy is 590.94086, rmsd is 30.403812
sib.fastconf.EADock3: Minimizing binding mode 1944, energy is 590.9459, rmsd is 30.604353
sib.fastconf.EADock3: Minimizing binding mode 1945, energy is 591.34186, rmsd is 64.64538
sib.fastconf.EADock3: Minimizing binding mode 1946, energy is 591.76044, rmsd is 45.145065
sib.fastconf.EADock3: Minimizing binding mode 1947, energy is 592.7285, rmsd is 46.07795
sib.fastconf.EADock3: Minimizing binding mode 1948, energy is 592.78613, rmsd is 30.841183
sib.fastconf.EADock3: Minimizing binding mode 1949, energy is 593.1199, rmsd is 41.824196
sib.fastconf.EADock3: Minimizing binding mode 1950, energy is 593.1424, rmsd is 35.925312
sib.fastconf.EADock3: Minimizing binding mode 1951, energy is 593.4215, rmsd is 46.233025
sib.fastconf.EADock3: Minimizing binding mode 1952, energy is 593.6138, rmsd is 63.55596
sib.fastconf.EADock3: Minimizing binding mode 1953, energy is 593.9372, rmsd is 45.249775
sib.fastconf.EADock3: Minimizing binding mode 1954, energy is 593.9999, rmsd is 47.247932
sib.fastconf.EADock3: Minimizing binding mode 1955, energy is 594.2388, rmsd is 12.392544
sib.fastconf.EADock3: Minimizing binding mode 1956, energy is 594.28265, rmsd is 65.90587
sib.fastconf.EADock3: Minimizing binding mode 1957, energy is 594.28436, rmsd is 3.3440661
sib.fastconf.EADock3: Minimizing binding mode 1958, energy is 595.41437, rmsd is 45.06745
sib.fastconf.EADock3: Minimizing binding mode 1959, energy is 595.47473, rmsd is 33.762726
sib.fastconf.EADock3: Minimizing binding mode 1960, energy is 595.4749, rmsd is 10.734995
sib.fastconf.EADock3: Minimizing binding mode 1961, energy is 595.47925, rmsd is 35.737198
sib.fastconf.EADock3: Minimizing binding mode 1962, energy is 595.5406, rmsd is 28.698198
sib.fastconf.EADock3: Minimizing binding mode 1963, energy is 595.7907, rmsd is 44.50609
sib.fastconf.EADock3: Minimizing binding mode 1964, energy is 596.99963, rmsd is 12.133529
sib.fastconf.EADock3: Minimizing binding mode 1965, energy is 597.1557, rmsd is 45.23513
sib.fastconf.EADock3: Minimizing binding mode 1966, energy is 597.6573, rmsd is 41.263107
sib.fastconf.EADock3: Minimizing binding mode 1967, energy is 597.93585, rmsd is 10.140727
sib.fastconf.EADock3: Minimizing binding mode 1968, energy is 597.9992, rmsd is 44.120052
sib.fastconf.EADock3: Minimizing binding mode 1969, energy is 598.53973, rmsd is 11.0147
sib.fastconf.EADock3: Minimizing binding mode 1970, energy is 598.71686, rmsd is 55.28847
sib.fastconf.EADock3: Minimizing binding mode 1971, energy is 599.2924, rmsd is 29.81763
sib.fastconf.EADock3: Minimizing binding mode 1972, energy is 600.1198, rmsd is 64.07361
sib.fastconf.EADock3: Minimizing binding mode 1973, energy is 600.6269, rmsd is 3.277629
sib.fastconf.EADock3: Minimizing binding mode 1974, energy is 601.28613, rmsd is 43.026577
sib.fastconf.EADock3: Minimizing binding mode 1975, energy is 601.5, rmsd is 1.496441
sib.fastconf.EADock3: Minimizing binding mode 1976, energy is 602.47565, rmsd is 2.606695
sib.fastconf.EADock3: Minimizing binding mode 1977, energy is 603.0602, rmsd is 31.978937
sib.fastconf.EADock3: Minimizing binding mode 1978, energy is 603.3337, rmsd is 35.98503
sib.fastconf.EADock3: Minimizing binding mode 1979, energy is 603.37195, rmsd is 44.985188
sib.fastconf.EADock3: Minimizing binding mode 1980, energy is 603.8151, rmsd is 41.102627
sib.fastconf.EADock3: Minimizing binding mode 1981, energy is 604.05426, rmsd is 30.463793
sib.fastconf.EADock3: Minimizing binding mode 1982, energy is 604.29865, rmsd is 33.543995
sib.fastconf.EADock3: Minimizing binding mode 1983, energy is 604.4301, rmsd is 1.8780833
sib.fastconf.EADock3: Minimizing binding mode 1984, energy is 604.6935, rmsd is 35.790085
sib.fastconf.EADock3: Minimizing binding mode 1985, energy is 604.8425, rmsd is 32.29653
sib.fastconf.EADock3: Minimizing binding mode 1986, energy is 606.4516, rmsd is 44.870785
sib.fastconf.EADock3: Minimizing binding mode 1987, energy is 606.5671, rmsd is 48.48397
sib.fastconf.EADock3: Minimizing binding mode 1988, energy is 606.67365, rmsd is 65.24847
sib.fastconf.EADock3: Minimizing binding mode 1989, energy is 607.0395, rmsd is 40.719666
sib.fastconf.EADock3: Minimizing binding mode 1990, energy is 607.3547, rmsd is 32.279747
sib.fastconf.EADock3: Minimizing binding mode 1991, energy is 608.0506, rmsd is 27.498636
sib.fastconf.EADock3: Minimizing binding mode 1992, energy is 608.38464, rmsd is 45.742085
sib.fastconf.EADock3: Minimizing binding mode 1993, energy is 609.2159, rmsd is 48.891384
sib.fastconf.EADock3: Minimizing binding mode 1994, energy is 609.58734, rmsd is 39.63882
sib.fastconf.EADock3: Minimizing binding mode 1995, energy is 609.7164, rmsd is 30.94623
sib.fastconf.EADock3: Minimizing binding mode 1996, energy is 609.7728, rmsd is 29.244017
sib.fastconf.EADock3: Minimizing binding mode 1997, energy is 610.3538, rmsd is 42.490875
sib.fastconf.EADock3: Minimizing binding mode 1998, energy is 610.55756, rmsd is 31.107777
sib.fastconf.EADock3: Minimizing binding mode 1999, energy is 610.796, rmsd is 63.92272
sib.fastconf.EADock3: Minimizing binding mode 2000, energy is 610.81635, rmsd is 47.275562
sib.fastconf.EADock3: Minimizing binding mode 2001, energy is 610.84906, rmsd is 39.162807
sib.fastconf.EADock3: Minimizing binding mode 2002, energy is 611.49664, rmsd is 30.344181
sib.fastconf.EADock3: Minimizing binding mode 2003, energy is 611.78174, rmsd is 36.864212
sib.fastconf.EADock3: Minimizing binding mode 2004, energy is 611.8215, rmsd is 37.161957
sib.fastconf.EADock3: Minimizing binding mode 2005, energy is 612.5193, rmsd is 37.434586
sib.fastconf.EADock3: Minimizing binding mode 2006, energy is 612.84094, rmsd is 12.853614
sib.fastconf.EADock3: Minimizing binding mode 2007, energy is 613.1502, rmsd is 37.955482
sib.fastconf.EADock3: Minimizing binding mode 2008, energy is 615.2489, rmsd is 29.39983
sib.fastconf.EADock3: Minimizing binding mode 2009, energy is 616.09314, rmsd is 46.957485
sib.fastconf.EADock3: Minimizing binding mode 2010, energy is 616.7629, rmsd is 45.631607
sib.fastconf.EADock3: Minimizing binding mode 2011, energy is 617.0873, rmsd is 43.728573
sib.fastconf.EADock3: Minimizing binding mode 2012, energy is 617.6145, rmsd is 41.810932
sib.fastconf.EADock3: Minimizing binding mode 2013, energy is 617.8232, rmsd is 37.483925
sib.fastconf.EADock3: Minimizing binding mode 2014, energy is 618.44507, rmsd is 39.359135
sib.fastconf.EADock3: Minimizing binding mode 2015, energy is 618.47784, rmsd is 52.658043
sib.fastconf.EADock3: Minimizing binding mode 2016, energy is 618.5265, rmsd is 31.732117
sib.fastconf.EADock3: Minimizing binding mode 2017, energy is 618.66205, rmsd is 37.206974
sib.fastconf.EADock3: Minimizing binding mode 2018, energy is 618.9663, rmsd is 30.498722
sib.fastconf.EADock3: Minimizing binding mode 2019, energy is 619.28644, rmsd is 43.28606
sib.fastconf.EADock3: Minimizing binding mode 2020, energy is 619.3009, rmsd is 63.88368
sib.fastconf.EADock3: Minimizing binding mode 2021, energy is 619.72943, rmsd is 40.023174
sib.fastconf.EADock3: Minimizing binding mode 2022, energy is 619.7897, rmsd is 3.1582341
sib.fastconf.EADock3: Minimizing binding mode 2023, energy is 619.92194, rmsd is 45.883747
sib.fastconf.EADock3: Minimizing binding mode 2024, energy is 620.01373, rmsd is 65.180786
sib.fastconf.EADock3: Minimizing binding mode 2025, energy is 620.08246, rmsd is 39.31851
sib.fastconf.EADock3: Minimizing binding mode 2026, energy is 621.0126, rmsd is 11.07809
sib.fastconf.EADock3: Minimizing binding mode 2027, energy is 621.5248, rmsd is 34.121357
sib.fastconf.EADock3: Minimizing binding mode 2028, energy is 621.84155, rmsd is 27.365435
sib.fastconf.EADock3: Minimizing binding mode 2029, energy is 622.43085, rmsd is 2.90267
sib.fastconf.EADock3: Minimizing binding mode 2030, energy is 622.64545, rmsd is 10.433643
sib.fastconf.EADock3: Minimizing binding mode 2031, energy is 623.3567, rmsd is 2.8280313
sib.fastconf.EADock3: Minimizing binding mode 2032, energy is 623.8281, rmsd is 29.844942
sib.fastconf.EADock3: Minimizing binding mode 2033, energy is 623.8398, rmsd is 45.575214
sib.fastconf.EADock3: Minimizing binding mode 2034, energy is 624.50867, rmsd is 2.0453136
sib.fastconf.EADock3: Minimizing binding mode 2035, energy is 625.09735, rmsd is 2.7935348
sib.fastconf.EADock3: Minimizing binding mode 2036, energy is 625.2403, rmsd is 12.890823
sib.fastconf.EADock3: Minimizing binding mode 2037, energy is 625.87665, rmsd is 31.715662
sib.fastconf.EADock3: Minimizing binding mode 2038, energy is 625.968, rmsd is 3.6399899
sib.fastconf.EADock3: Minimizing binding mode 2039, energy is 626.2368, rmsd is 38.82157
sib.fastconf.EADock3: Minimizing binding mode 2040, energy is 626.6064, rmsd is 53.372314
sib.fastconf.EADock3: Minimizing binding mode 2041, energy is 627.807, rmsd is 31.597904
sib.fastconf.EADock3: Minimizing binding mode 2042, energy is 628.2117, rmsd is 64.96432
sib.fastconf.EADock3: Minimizing binding mode 2043, energy is 628.2292, rmsd is 43.41238
sib.fastconf.EADock3: Minimizing binding mode 2044, energy is 628.9199, rmsd is 11.609959
sib.fastconf.EADock3: Minimizing binding mode 2045, energy is 629.0045, rmsd is 43.1679
sib.fastconf.EADock3: Minimizing binding mode 2046, energy is 631.892, rmsd is 43.329353
sib.fastconf.EADock3: Minimizing binding mode 2047, energy is 632.23267, rmsd is 35.83264
sib.fastconf.EADock3: Minimizing binding mode 2048, energy is 632.73584, rmsd is 30.78573
sib.fastconf.EADock3: Minimizing binding mode 2049, energy is 632.7469, rmsd is 3.4616408
sib.fastconf.EADock3: Minimizing binding mode 2050, energy is 632.8424, rmsd is 41.268448
sib.fastconf.EADock3: Minimizing binding mode 2051, energy is 632.9515, rmsd is 40.61967
sib.fastconf.EADock3: Minimizing binding mode 2052, energy is 633.12885, rmsd is 63.990097
sib.fastconf.EADock3: Minimizing binding mode 2053, energy is 633.4083, rmsd is 31.330996
sib.fastconf.EADock3: Minimizing binding mode 2054, energy is 634.1966, rmsd is 28.55658
sib.fastconf.EADock3: Minimizing binding mode 2055, energy is 634.5432, rmsd is 39.109726
sib.fastconf.EADock3: Minimizing binding mode 2056, energy is 635.07837, rmsd is 31.966911
sib.fastconf.EADock3: Minimizing binding mode 2057, energy is 635.1567, rmsd is 30.722809
sib.fastconf.EADock3: Minimizing binding mode 2058, energy is 635.71185, rmsd is 51.339184
sib.fastconf.EADock3: Minimizing binding mode 2059, energy is 636.21674, rmsd is 37.329296
sib.fastconf.EADock3: Minimizing binding mode 2060, energy is 636.5606, rmsd is 40.218307
sib.fastconf.EADock3: Minimizing binding mode 2061, energy is 636.63947, rmsd is 34.490696
sib.fastconf.EADock3: Minimizing binding mode 2062, energy is 636.6987, rmsd is 33.34773
sib.fastconf.EADock3: Minimizing binding mode 2063, energy is 636.75726, rmsd is 12.752617
sib.fastconf.EADock3: Minimizing binding mode 2064, energy is 637.633, rmsd is 2.63409
sib.fastconf.EADock3: Minimizing binding mode 2065, energy is 637.915, rmsd is 41.440746
sib.fastconf.EADock3: Minimizing binding mode 2066, energy is 638.3086, rmsd is 40.896496
sib.fastconf.EADock3: Minimizing binding mode 2067, energy is 638.89185, rmsd is 45.28196
sib.fastconf.EADock3: Minimizing binding mode 2068, energy is 640.0648, rmsd is 33.196175
sib.fastconf.EADock3: Minimizing binding mode 2069, energy is 640.1466, rmsd is 3.3974416
sib.fastconf.EADock3: Minimizing binding mode 2070, energy is 640.393, rmsd is 28.695879
sib.fastconf.EADock3: Minimizing binding mode 2071, energy is 641.22864, rmsd is 42.494427
sib.fastconf.EADock3: Minimizing binding mode 2072, energy is 641.69727, rmsd is 48.29847
sib.fastconf.EADock3: Minimizing binding mode 2073, energy is 641.79944, rmsd is 34.715473
sib.fastconf.EADock3: Minimizing binding mode 2074, energy is 642.4141, rmsd is 44.96248
sib.fastconf.EADock3: Minimizing binding mode 2075, energy is 642.8103, rmsd is 33.55506
sib.fastconf.EADock3: Minimizing binding mode 2076, energy is 643.1917, rmsd is 44.98621
sib.fastconf.EADock3: Minimizing binding mode 2077, energy is 643.35645, rmsd is 35.868
sib.fastconf.EADock3: Minimizing binding mode 2078, energy is 644.85767, rmsd is 45.81304
sib.fastconf.EADock3: Minimizing binding mode 2079, energy is 645.04834, rmsd is 29.699818
sib.fastconf.EADock3: Minimizing binding mode 2080, energy is 645.22437, rmsd is 21.299557
sib.fastconf.EADock3: Minimizing binding mode 2081, energy is 646.072, rmsd is 41.80237
sib.fastconf.EADock3: Minimizing binding mode 2082, energy is 646.1549, rmsd is 33.42004
sib.fastconf.EADock3: Minimizing binding mode 2083, energy is 646.6497, rmsd is 42.637688
sib.fastconf.EADock3: Minimizing binding mode 2084, energy is 646.77344, rmsd is 36.88389
sib.fastconf.EADock3: Minimizing binding mode 2085, energy is 647.076, rmsd is 34.4095
sib.fastconf.EADock3: Minimizing binding mode 2086, energy is 647.1833, rmsd is 3.435313
sib.fastconf.EADock3: Minimizing binding mode 2087, energy is 647.70905, rmsd is 39.92762
sib.fastconf.EADock3: Minimizing binding mode 2088, energy is 647.785, rmsd is 31.147816
sib.fastconf.EADock3: Minimizing binding mode 2089, energy is 647.8042, rmsd is 44.549572
sib.fastconf.EADock3: Minimizing binding mode 2090, energy is 648.23047, rmsd is 43.97351
sib.fastconf.EADock3: Minimizing binding mode 2091, energy is 649.22314, rmsd is 34.584934
sib.fastconf.EADock3: Minimizing binding mode 2092, energy is 649.3431, rmsd is 11.770873
sib.fastconf.EADock3: Minimizing binding mode 2093, energy is 649.3717, rmsd is 39.728527
sib.fastconf.EADock3: Minimizing binding mode 2094, energy is 649.4166, rmsd is 47.994892
sib.fastconf.EADock3: Minimizing binding mode 2095, energy is 649.4787, rmsd is 37.586052
sib.fastconf.EADock3: Minimizing binding mode 2096, energy is 650.729, rmsd is 33.916084
sib.fastconf.EADock3: Minimizing binding mode 2097, energy is 650.7343, rmsd is 35.07181
sib.fastconf.EADock3: Minimizing binding mode 2098, energy is 650.9445, rmsd is 44.45631
sib.fastconf.EADock3: Minimizing binding mode 2099, energy is 651.0816, rmsd is 32.901154
sib.fastconf.EADock3: Minimizing binding mode 2100, energy is 651.48834, rmsd is 64.43579
sib.fastconf.EADock3: Minimizing binding mode 2101, energy is 651.8257, rmsd is 43.24911
sib.fastconf.EADock3: Minimizing binding mode 2102, energy is 652.31104, rmsd is 39.192017
sib.fastconf.EADock3: Minimizing binding mode 2103, energy is 653.28564, rmsd is 2.6621778
sib.fastconf.EADock3: Minimizing binding mode 2104, energy is 653.5748, rmsd is 30.720829
sib.fastconf.EADock3: Minimizing binding mode 2105, energy is 653.87775, rmsd is 32.496357
sib.fastconf.EADock3: Minimizing binding mode 2106, energy is 654.0066, rmsd is 56.376804
sib.fastconf.EADock3: Minimizing binding mode 2107, energy is 654.49756, rmsd is 38.87371
sib.fastconf.EADock3: Minimizing binding mode 2108, energy is 654.5647, rmsd is 33.06827
sib.fastconf.EADock3: Minimizing binding mode 2109, energy is 655.52606, rmsd is 45.079487
sib.fastconf.EADock3: Minimizing binding mode 2110, energy is 655.547, rmsd is 31.378502
sib.fastconf.EADock3: Minimizing binding mode 2111, energy is 655.6887, rmsd is 29.35112
sib.fastconf.EADock3: Minimizing binding mode 2112, energy is 656.33496, rmsd is 42.781803
sib.fastconf.EADock3: Minimizing binding mode 2113, energy is 656.348, rmsd is 11.082498
sib.fastconf.EADock3: Minimizing binding mode 2114, energy is 656.5083, rmsd is 3.191708
sib.fastconf.EADock3: Minimizing binding mode 2115, energy is 656.6845, rmsd is 33.867455
sib.fastconf.EADock3: Minimizing binding mode 2116, energy is 656.85333, rmsd is 63.847855
sib.fastconf.EADock3: Minimizing binding mode 2117, energy is 657.4145, rmsd is 45.910805
sib.fastconf.EADock3: Minimizing binding mode 2118, energy is 657.7365, rmsd is 32.85836
sib.fastconf.EADock3: Minimizing binding mode 2119, energy is 657.7764, rmsd is 46.366085
sib.fastconf.EADock3: Minimizing binding mode 2120, energy is 657.8486, rmsd is 39.134422
sib.fastconf.EADock3: Minimizing binding mode 2121, energy is 657.9995, rmsd is 42.490906
sib.fastconf.EADock3: Minimizing binding mode 2122, energy is 658.0134, rmsd is 40.04064
sib.fastconf.EADock3: Minimizing binding mode 2123, energy is 658.35944, rmsd is 12.129592
sib.fastconf.EADock3: Minimizing binding mode 2124, energy is 658.4972, rmsd is 33.531384
sib.fastconf.EADock3: Minimizing binding mode 2125, energy is 658.56287, rmsd is 29.609793
sib.fastconf.EADock3: Minimizing binding mode 2126, energy is 658.6798, rmsd is 39.2858
sib.fastconf.EADock3: Minimizing binding mode 2127, energy is 659.91, rmsd is 40.25347
sib.fastconf.EADock3: Minimizing binding mode 2128, energy is 660.2484, rmsd is 33.811977
sib.fastconf.EADock3: Minimizing binding mode 2129, energy is 660.3781, rmsd is 47.897873
sib.fastconf.EADock3: Minimizing binding mode 2130, energy is 661.2439, rmsd is 44.42422
sib.fastconf.EADock3: Minimizing binding mode 2131, energy is 661.82733, rmsd is 36.523403
sib.fastconf.EADock3: Minimizing binding mode 2132, energy is 662.25836, rmsd is 40.35921
sib.fastconf.EADock3: Minimizing binding mode 2133, energy is 663.70874, rmsd is 38.596344
sib.fastconf.EADock3: Minimizing binding mode 2134, energy is 663.9004, rmsd is 44.02913
sib.fastconf.EADock3: Minimizing binding mode 2135, energy is 664.6414, rmsd is 65.818
sib.fastconf.EADock3: Minimizing binding mode 2136, energy is 664.7868, rmsd is 46.466705
sib.fastconf.EADock3: Minimizing binding mode 2137, energy is 664.8694, rmsd is 41.89935
sib.fastconf.EADock3: Minimizing binding mode 2138, energy is 665.1553, rmsd is 32.705326
sib.fastconf.EADock3: Minimizing binding mode 2139, energy is 665.1582, rmsd is 35.359715
sib.fastconf.EADock3: Minimizing binding mode 2140, energy is 665.334, rmsd is 41.691822
sib.fastconf.EADock3: Minimizing binding mode 2141, energy is 665.5509, rmsd is 31.055477
sib.fastconf.EADock3: Minimizing binding mode 2142, energy is 665.5815, rmsd is 28.65339
sib.fastconf.EADock3: Minimizing binding mode 2143, energy is 665.73694, rmsd is 34.494537
sib.fastconf.EADock3: Minimizing binding mode 2144, energy is 665.746, rmsd is 39.08375
sib.fastconf.EADock3: Minimizing binding mode 2145, energy is 667.05597, rmsd is 41.566307
sib.fastconf.EADock3: Minimizing binding mode 2146, energy is 667.42426, rmsd is 13.363459
sib.fastconf.EADock3: Minimizing binding mode 2147, energy is 667.73505, rmsd is 50.774952
sib.fastconf.EADock3: Minimizing binding mode 2148, energy is 668.18, rmsd is 33.247932
sib.fastconf.EADock3: Minimizing binding mode 2149, energy is 668.22363, rmsd is 41.667236
sib.fastconf.EADock3: Minimizing binding mode 2150, energy is 669.06104, rmsd is 46.99276
sib.fastconf.EADock3: Minimizing binding mode 2151, energy is 669.1275, rmsd is 44.9657
sib.fastconf.EADock3: Minimizing binding mode 2152, energy is 669.1885, rmsd is 28.95337
sib.fastconf.EADock3: Minimizing binding mode 2153, energy is 669.2169, rmsd is 32.925007
sib.fastconf.EADock3: Minimizing binding mode 2154, energy is 669.7415, rmsd is 31.543087
sib.fastconf.EADock3: Minimizing binding mode 2155, energy is 669.9508, rmsd is 46.146877
sib.fastconf.EADock3: Minimizing binding mode 2156, energy is 670.24945, rmsd is 45.185265
sib.fastconf.EADock3: Minimizing binding mode 2157, energy is 670.28033, rmsd is 64.06791
sib.fastconf.EADock3: Minimizing binding mode 2158, energy is 670.339, rmsd is 44.07443
sib.fastconf.EADock3: Minimizing binding mode 2159, energy is 670.59125, rmsd is 45.74178
sib.fastconf.EADock3: Minimizing binding mode 2160, energy is 670.7207, rmsd is 32.15314
sib.fastconf.EADock3: Minimizing binding mode 2161, energy is 670.85535, rmsd is 35.9394
sib.fastconf.EADock3: Minimizing binding mode 2162, energy is 670.9545, rmsd is 31.122585
sib.fastconf.EADock3: Minimizing binding mode 2163, energy is 670.96106, rmsd is 2.052636
sib.fastconf.EADock3: Minimizing binding mode 2164, energy is 671.49194, rmsd is 44.886833
sib.fastconf.EADock3: Minimizing binding mode 2165, energy is 672.12885, rmsd is 2.5205803
sib.fastconf.EADock3: Minimizing binding mode 2166, energy is 672.2339, rmsd is 43.633762
sib.fastconf.EADock3: Minimizing binding mode 2167, energy is 673.09717, rmsd is 2.4895346
sib.fastconf.EADock3: Minimizing binding mode 2168, energy is 673.17267, rmsd is 29.64911
sib.fastconf.EADock3: Minimizing binding mode 2169, energy is 673.4964, rmsd is 12.290396
sib.fastconf.EADock3: Minimizing binding mode 2170, energy is 673.49786, rmsd is 40.33877
sib.fastconf.EADock3: Minimizing binding mode 2171, energy is 675.7382, rmsd is 33.03424
sib.fastconf.EADock3: Minimizing binding mode 2172, energy is 676.437, rmsd is 35.337147
sib.fastconf.EADock3: Minimizing binding mode 2173, energy is 676.8036, rmsd is 34.768467
sib.fastconf.EADock3: Minimizing binding mode 2174, energy is 676.842, rmsd is 55.29207
sib.fastconf.EADock3: Minimizing binding mode 2175, energy is 676.97003, rmsd is 43.99875
sib.fastconf.EADock3: Minimizing binding mode 2176, energy is 677.01624, rmsd is 35.107586
sib.fastconf.EADock3: Minimizing binding mode 2177, energy is 677.03357, rmsd is 37.637337
sib.fastconf.EADock3: Minimizing binding mode 2178, energy is 677.2115, rmsd is 11.622553
sib.fastconf.EADock3: Minimizing binding mode 2179, energy is 677.23846, rmsd is 14.224061
sib.fastconf.EADock3: Minimizing binding mode 2180, energy is 677.95013, rmsd is 46.70685
sib.fastconf.EADock3: Minimizing binding mode 2181, energy is 678.44, rmsd is 43.453255
sib.fastconf.EADock3: Minimizing binding mode 2182, energy is 678.5743, rmsd is 48.223198
sib.fastconf.EADock3: Minimizing binding mode 2183, energy is 678.73004, rmsd is 41.47491
sib.fastconf.EADock3: Minimizing binding mode 2184, energy is 678.99603, rmsd is 32.84622
sib.fastconf.EADock3: Minimizing binding mode 2185, energy is 679.1434, rmsd is 48.84428
sib.fastconf.EADock3: Minimizing binding mode 2186, energy is 679.63306, rmsd is 42.032543
sib.fastconf.EADock3: Minimizing binding mode 2187, energy is 679.8238, rmsd is 41.393402
sib.fastconf.EADock3: Minimizing binding mode 2188, energy is 680.30176, rmsd is 66.97232
sib.fastconf.EADock3: Minimizing binding mode 2189, energy is 680.5615, rmsd is 29.932226
sib.fastconf.EADock3: Minimizing binding mode 2190, energy is 681.3166, rmsd is 54.79373
sib.fastconf.EADock3: Minimizing binding mode 2191, energy is 682.76764, rmsd is 37.49493
sib.fastconf.EADock3: Minimizing binding mode 2192, energy is 682.76855, rmsd is 42.678852
sib.fastconf.EADock3: Minimizing binding mode 2193, energy is 682.8577, rmsd is 40.435734
sib.fastconf.EADock3: Minimizing binding mode 2194, energy is 683.22424, rmsd is 32.567657
sib.fastconf.EADock3: Minimizing binding mode 2195, energy is 683.74, rmsd is 56.207893
sib.fastconf.EADock3: Minimizing binding mode 2196, energy is 683.91626, rmsd is 2.9067369
sib.fastconf.EADock3: Minimizing binding mode 2197, energy is 684.2128, rmsd is 34.03462
sib.fastconf.EADock3: Minimizing binding mode 2198, energy is 684.5449, rmsd is 45.416927
sib.fastconf.EADock3: Minimizing binding mode 2199, energy is 684.99304, rmsd is 45.215748
sib.fastconf.EADock3: Minimizing binding mode 2200, energy is 685.3902, rmsd is 1.7144532
sib.fastconf.EADock3: Minimizing binding mode 2201, energy is 686.7948, rmsd is 65.33227
sib.fastconf.EADock3: Minimizing binding mode 2202, energy is 686.8867, rmsd is 29.78175
sib.fastconf.EADock3: Minimizing binding mode 2203, energy is 687.3474, rmsd is 43.431767
sib.fastconf.EADock3: Minimizing binding mode 2204, energy is 687.5621, rmsd is 39.88787
sib.fastconf.EADock3: Minimizing binding mode 2205, energy is 688.2911, rmsd is 44.95189
sib.fastconf.EADock3: Minimizing binding mode 2206, energy is 688.30255, rmsd is 3.442227
sib.fastconf.EADock3: Minimizing binding mode 2207, energy is 690.3996, rmsd is 37.000618
sib.fastconf.EADock3: Minimizing binding mode 2208, energy is 691.1222, rmsd is 34.739876
sib.fastconf.EADock3: Minimizing binding mode 2209, energy is 691.7229, rmsd is 45.911476
sib.fastconf.EADock3: Minimizing binding mode 2210, energy is 692.2643, rmsd is 49.514145
sib.fastconf.EADock3: Minimizing binding mode 2211, energy is 694.2274, rmsd is 67.0227
sib.fastconf.EADock3: Minimizing binding mode 2212, energy is 694.3288, rmsd is 42.25713
sib.fastconf.EADock3: Minimizing binding mode 2213, energy is 694.9429, rmsd is 40.757713
sib.fastconf.EADock3: Minimizing binding mode 2214, energy is 695.03625, rmsd is 31.89081
sib.fastconf.EADock3: Minimizing binding mode 2215, energy is 695.1197, rmsd is 40.831512
sib.fastconf.EADock3: Minimizing binding mode 2216, energy is 695.15106, rmsd is 33.384182
sib.fastconf.EADock3: Minimizing binding mode 2217, energy is 695.6633, rmsd is 2.6586466
sib.fastconf.EADock3: Minimizing binding mode 2218, energy is 696.03033, rmsd is 32.715313
sib.fastconf.EADock3: Minimizing binding mode 2219, energy is 696.5165, rmsd is 11.883362
sib.fastconf.EADock3: Minimizing binding mode 2220, energy is 696.74365, rmsd is 36.92667
sib.fastconf.EADock3: Minimizing binding mode 2221, energy is 697.4692, rmsd is 53.45525
sib.fastconf.EADock3: Minimizing binding mode 2222, energy is 697.7576, rmsd is 30.323189
sib.fastconf.EADock3: Minimizing binding mode 2223, energy is 698.17365, rmsd is 45.463654
sib.fastconf.EADock3: Minimizing binding mode 2224, energy is 698.3294, rmsd is 31.558489
sib.fastconf.EADock3: Minimizing binding mode 2225, energy is 699.47723, rmsd is 33.529358
sib.fastconf.EADock3: Minimizing binding mode 2226, energy is 699.69727, rmsd is 64.005226
sib.fastconf.EADock3: Minimizing binding mode 2227, energy is 699.8221, rmsd is 32.799248
sib.fastconf.EADock3: Minimizing binding mode 2228, energy is 700.10516, rmsd is 38.90457
sib.fastconf.EADock3: Minimizing binding mode 2229, energy is 701.22876, rmsd is 36.353584
sib.fastconf.EADock3: Minimizing binding mode 2230, energy is 701.3479, rmsd is 31.546207
sib.fastconf.EADock3: Minimizing binding mode 2231, energy is 702.09265, rmsd is 43.230183
sib.fastconf.EADock3: Minimizing binding mode 2232, energy is 702.157, rmsd is 35.68311
sib.fastconf.EADock3: Minimizing binding mode 2233, energy is 702.4774, rmsd is 11.191824
sib.fastconf.EADock3: Minimizing binding mode 2234, energy is 702.7015, rmsd is 42.05475
sib.fastconf.EADock3: Minimizing binding mode 2235, energy is 703.3461, rmsd is 55.35942
sib.fastconf.EADock3: Minimizing binding mode 2236, energy is 703.35504, rmsd is 2.3031287
sib.fastconf.EADock3: Minimizing binding mode 2237, energy is 703.6658, rmsd is 34.472645
sib.fastconf.EADock3: Minimizing binding mode 2238, energy is 703.9266, rmsd is 51.921
sib.fastconf.EADock3: Minimizing binding mode 2239, energy is 705.21954, rmsd is 3.3347905
sib.fastconf.EADock3: Minimizing binding mode 2240, energy is 705.5944, rmsd is 3.5830066
sib.fastconf.EADock3: Minimizing binding mode 2241, energy is 705.97986, rmsd is 39.7222
sib.fastconf.EADock3: Minimizing binding mode 2242, energy is 706.275, rmsd is 29.578169
sib.fastconf.EADock3: Minimizing binding mode 2243, energy is 706.2789, rmsd is 44.147663
sib.fastconf.EADock3: Minimizing binding mode 2244, energy is 706.6621, rmsd is 33.81318
sib.fastconf.EADock3: Minimizing binding mode 2245, energy is 707.1191, rmsd is 43.843956
sib.fastconf.EADock3: Minimizing binding mode 2246, energy is 708.73236, rmsd is 31.376768
sib.fastconf.EADock3: Minimizing binding mode 2247, energy is 708.7492, rmsd is 40.778015
sib.fastconf.EADock3: Minimizing binding mode 2248, energy is 708.8054, rmsd is 46.00021
sib.fastconf.EADock3: Minimizing binding mode 2249, energy is 708.83514, rmsd is 46.623337
sib.fastconf.EADock3: Minimizing binding mode 2250, energy is 709.27136, rmsd is 30.657415
sib.fastconf.EADock3: Minimizing binding mode 2251, energy is 709.56006, rmsd is 44.957134
sib.fastconf.EADock3: Minimizing binding mode 2252, energy is 710.09644, rmsd is 44.71712
sib.fastconf.EADock3: Minimizing binding mode 2253, energy is 710.29407, rmsd is 13.092981
sib.fastconf.EADock3: Minimizing binding mode 2254, energy is 710.5245, rmsd is 37.099693
sib.fastconf.EADock3: Minimizing binding mode 2255, energy is 711.1284, rmsd is 13.316512
sib.fastconf.EADock3: Minimizing binding mode 2256, energy is 711.8312, rmsd is 32.469334
sib.fastconf.EADock3: Minimizing binding mode 2257, energy is 712.4823, rmsd is 2.1271303
sib.fastconf.EADock3: Minimizing binding mode 2258, energy is 713.1668, rmsd is 2.0132542
sib.fastconf.EADock3: Minimizing binding mode 2259, energy is 713.6578, rmsd is 31.487888
sib.fastconf.EADock3: Minimizing binding mode 2260, energy is 714.12164, rmsd is 12.601684
sib.fastconf.EADock3: Minimizing binding mode 2261, energy is 714.17303, rmsd is 10.397005
sib.fastconf.EADock3: Minimizing binding mode 2262, energy is 714.812, rmsd is 34.53337
sib.fastconf.EADock3: Minimizing binding mode 2263, energy is 715.81964, rmsd is 29.829275
sib.fastconf.EADock3: Minimizing binding mode 2264, energy is 715.94025, rmsd is 3.0477693
sib.fastconf.EADock3: Minimizing binding mode 2265, energy is 717.5075, rmsd is 13.956115
sib.fastconf.EADock3: Minimizing binding mode 2266, energy is 717.58307, rmsd is 29.412298
sib.fastconf.EADock3: Minimizing binding mode 2267, energy is 717.65576, rmsd is 2.6035378
sib.fastconf.EADock3: Minimizing binding mode 2268, energy is 717.8781, rmsd is 40.62533
sib.fastconf.EADock3: Minimizing binding mode 2269, energy is 718.03906, rmsd is 1.6008706
sib.fastconf.EADock3: Minimizing binding mode 2270, energy is 718.1299, rmsd is 11.198562
sib.fastconf.EADock3: Minimizing binding mode 2271, energy is 718.57, rmsd is 31.2965
sib.fastconf.EADock3: Minimizing binding mode 2272, energy is 718.6004, rmsd is 11.33098
sib.fastconf.EADock3: Minimizing binding mode 2273, energy is 719.241, rmsd is 34.96823
sib.fastconf.EADock3: Minimizing binding mode 2274, energy is 719.5381, rmsd is 43.8827
sib.fastconf.EADock3: Minimizing binding mode 2275, energy is 719.8187, rmsd is 40.10012
sib.fastconf.EADock3: Minimizing binding mode 2276, energy is 720.2105, rmsd is 45.650692
sib.fastconf.EADock3: Minimizing binding mode 2277, energy is 720.26575, rmsd is 35.515823
sib.fastconf.EADock3: Minimizing binding mode 2278, energy is 720.8599, rmsd is 30.422714
sib.fastconf.EADock3: Minimizing binding mode 2279, energy is 720.8955, rmsd is 66.033646
sib.fastconf.EADock3: Minimizing binding mode 2280, energy is 721.2409, rmsd is 37.65548
sib.fastconf.EADock3: Minimizing binding mode 2281, energy is 721.8516, rmsd is 3.1432962
sib.fastconf.EADock3: Minimizing binding mode 2282, energy is 724.18176, rmsd is 12.731996
sib.fastconf.EADock3: Minimizing binding mode 2283, energy is 724.899, rmsd is 47.77135
sib.fastconf.EADock3: Minimizing binding mode 2284, energy is 726.0443, rmsd is 34.34037
sib.fastconf.EADock3: Minimizing binding mode 2285, energy is 726.33075, rmsd is 11.227399
sib.fastconf.EADock3: Minimizing binding mode 2286, energy is 726.4227, rmsd is 46.335686
sib.fastconf.EADock3: Minimizing binding mode 2287, energy is 726.49274, rmsd is 41.91455
sib.fastconf.EADock3: Minimizing binding mode 2288, energy is 726.7451, rmsd is 50.472683
sib.fastconf.EADock3: Minimizing binding mode 2289, energy is 727.0445, rmsd is 39.920998
sib.fastconf.EADock3: Minimizing binding mode 2290, energy is 727.1073, rmsd is 29.471107
sib.fastconf.EADock3: Minimizing binding mode 2291, energy is 727.7551, rmsd is 33.802258
sib.fastconf.EADock3: Minimizing binding mode 2292, energy is 727.7775, rmsd is 36.8293
sib.fastconf.EADock3: Minimizing binding mode 2293, energy is 728.18207, rmsd is 36.278526
sib.fastconf.EADock3: Minimizing binding mode 2294, energy is 728.2891, rmsd is 34.702225
sib.fastconf.EADock3: Minimizing binding mode 2295, energy is 729.0034, rmsd is 36.544266
sib.fastconf.EADock3: Minimizing binding mode 2296, energy is 729.0341, rmsd is 42.41056
sib.fastconf.EADock3: Minimizing binding mode 2297, energy is 729.28766, rmsd is 2.5348768
sib.fastconf.EADock3: Minimizing binding mode 2298, energy is 729.5746, rmsd is 2.7032158
sib.fastconf.EADock3: Minimizing binding mode 2299, energy is 730.1769, rmsd is 45.42178
sib.fastconf.EADock3: Minimizing binding mode 2300, energy is 730.3456, rmsd is 31.796202
sib.fastconf.EADock3: Minimizing binding mode 2301, energy is 730.37195, rmsd is 34.139347
sib.fastconf.EADock3: Minimizing binding mode 2302, energy is 730.41876, rmsd is 66.29714
sib.fastconf.EADock3: Minimizing binding mode 2303, energy is 730.50214, rmsd is 15.441141
sib.fastconf.EADock3: Minimizing binding mode 2304, energy is 730.59045, rmsd is 65.103035
sib.fastconf.EADock3: Minimizing binding mode 2305, energy is 731.3824, rmsd is 63.762966
sib.fastconf.EADock3: Minimizing binding mode 2306, energy is 731.75354, rmsd is 45.073048
sib.fastconf.EADock3: Minimizing binding mode 2307, energy is 733.2886, rmsd is 39.22142
sib.fastconf.EADock3: Minimizing binding mode 2308, energy is 733.7601, rmsd is 36.66718
sib.fastconf.EADock3: Minimizing binding mode 2309, energy is 735.20874, rmsd is 13.365314
sib.fastconf.EADock3: Minimizing binding mode 2310, energy is 735.55536, rmsd is 12.392385
sib.fastconf.EADock3: Minimizing binding mode 2311, energy is 736.15985, rmsd is 34.357452
sib.fastconf.EADock3: Minimizing binding mode 2312, energy is 736.7742, rmsd is 31.92051
sib.fastconf.EADock3: Minimizing binding mode 2313, energy is 737.49896, rmsd is 46.804184
sib.fastconf.EADock3: Minimizing binding mode 2314, energy is 738.62897, rmsd is 46.282444
sib.fastconf.EADock3: Minimizing binding mode 2315, energy is 739.0182, rmsd is 44.907757
sib.fastconf.EADock3: Minimizing binding mode 2316, energy is 739.5275, rmsd is 2.4236133
sib.fastconf.EADock3: Minimizing binding mode 2317, energy is 739.85785, rmsd is 2.50215
sib.fastconf.EADock3: Minimizing binding mode 2318, energy is 740.5757, rmsd is 42.50685
sib.fastconf.EADock3: Minimizing binding mode 2319, energy is 740.65265, rmsd is 37.99543
sib.fastconf.EADock3: Minimizing binding mode 2320, energy is 740.7934, rmsd is 2.8329346
sib.fastconf.EADock3: Minimizing binding mode 2321, energy is 740.8291, rmsd is 47.890644
sib.fastconf.EADock3: Minimizing binding mode 2322, energy is 741.49225, rmsd is 38.78657
sib.fastconf.EADock3: Minimizing binding mode 2323, energy is 741.49243, rmsd is 47.564655
sib.fastconf.EADock3: Minimizing binding mode 2324, energy is 743.05414, rmsd is 45.768646
sib.fastconf.EADock3: Minimizing binding mode 2325, energy is 743.9588, rmsd is 44.70302
sib.fastconf.EADock3: Minimizing binding mode 2326, energy is 744.0648, rmsd is 42.59379
sib.fastconf.EADock3: Minimizing binding mode 2327, energy is 744.0725, rmsd is 31.539324
sib.fastconf.EADock3: Minimizing binding mode 2328, energy is 744.1564, rmsd is 33.98177
sib.fastconf.EADock3: Minimizing binding mode 2329, energy is 744.90814, rmsd is 3.1514876
sib.fastconf.EADock3: Minimizing binding mode 2330, energy is 745.05945, rmsd is 63.63882
sib.fastconf.EADock3: Minimizing binding mode 2331, energy is 745.20544, rmsd is 34.215546
sib.fastconf.EADock3: Minimizing binding mode 2332, energy is 746.2604, rmsd is 2.656276
sib.fastconf.EADock3: Minimizing binding mode 2333, energy is 746.3631, rmsd is 30.91653
sib.fastconf.EADock3: Minimizing binding mode 2334, energy is 746.5512, rmsd is 33.43009
sib.fastconf.EADock3: Minimizing binding mode 2335, energy is 746.91284, rmsd is 13.949714
sib.fastconf.EADock3: Minimizing binding mode 2336, energy is 747.5679, rmsd is 11.938636
sib.fastconf.EADock3: Minimizing binding mode 2337, energy is 747.80414, rmsd is 39.999763
sib.fastconf.EADock3: Minimizing binding mode 2338, energy is 748.28784, rmsd is 44.767754
sib.fastconf.EADock3: Minimizing binding mode 2339, energy is 748.5123, rmsd is 44.48619
sib.fastconf.EADock3: Minimizing binding mode 2340, energy is 749.40796, rmsd is 31.449615
sib.fastconf.EADock3: Minimizing binding mode 2341, energy is 749.55084, rmsd is 44.7056
sib.fastconf.EADock3: Minimizing binding mode 2342, energy is 749.7838, rmsd is 45.864258
sib.fastconf.EADock3: Minimizing binding mode 2343, energy is 750.1233, rmsd is 46.03722
sib.fastconf.EADock3: Minimizing binding mode 2344, energy is 750.16327, rmsd is 3.0626214
sib.fastconf.EADock3: Minimizing binding mode 2345, energy is 750.4826, rmsd is 32.557484
sib.fastconf.EADock3: Minimizing binding mode 2346, energy is 750.83246, rmsd is 46.20081
sib.fastconf.EADock3: Minimizing binding mode 2347, energy is 750.9316, rmsd is 64.78229
sib.fastconf.EADock3: Minimizing binding mode 2348, energy is 750.9895, rmsd is 12.744473
sib.fastconf.EADock3: Minimizing binding mode 2349, energy is 751.0149, rmsd is 32.435883
sib.fastconf.EADock3: Minimizing binding mode 2350, energy is 752.1543, rmsd is 37.415222
sib.fastconf.EADock3: Minimizing binding mode 2351, energy is 752.3678, rmsd is 33.988888
sib.fastconf.EADock3: Minimizing binding mode 2352, energy is 752.5692, rmsd is 63.241264
sib.fastconf.EADock3: Minimizing binding mode 2353, energy is 752.6023, rmsd is 45.18688
sib.fastconf.EADock3: Minimizing binding mode 2354, energy is 752.7269, rmsd is 11.785326
sib.fastconf.EADock3: Minimizing binding mode 2355, energy is 754.9713, rmsd is 32.077995
sib.fastconf.EADock3: Minimizing binding mode 2356, energy is 755.09424, rmsd is 11.072885
sib.fastconf.EADock3: Minimizing binding mode 2357, energy is 755.3775, rmsd is 67.04951
sib.fastconf.EADock3: Minimizing binding mode 2358, energy is 755.78394, rmsd is 29.910463
sib.fastconf.EADock3: Minimizing binding mode 2359, energy is 756.58374, rmsd is 43.705967
sib.fastconf.EADock3: Minimizing binding mode 2360, energy is 756.6526, rmsd is 44.065544
sib.fastconf.EADock3: Minimizing binding mode 2361, energy is 756.6622, rmsd is 1.6001302
sib.fastconf.EADock3: Minimizing binding mode 2362, energy is 756.73706, rmsd is 12.804035
sib.fastconf.EADock3: Minimizing binding mode 2363, energy is 756.8371, rmsd is 34.593876
sib.fastconf.EADock3: Minimizing binding mode 2364, energy is 757.0296, rmsd is 38.61494
sib.fastconf.EADock3: Minimizing binding mode 2365, energy is 757.0995, rmsd is 10.527113
sib.fastconf.EADock3: Minimizing binding mode 2366, energy is 758.1108, rmsd is 44.289875
sib.fastconf.EADock3: Minimizing binding mode 2367, energy is 758.93506, rmsd is 44.772297
sib.fastconf.EADock3: Minimizing binding mode 2368, energy is 759.2452, rmsd is 46.942986
sib.fastconf.EADock3: Minimizing binding mode 2369, energy is 760.215, rmsd is 48.38661
sib.fastconf.EADock3: Minimizing binding mode 2370, energy is 760.3798, rmsd is 46.566498
sib.fastconf.EADock3: Minimizing binding mode 2371, energy is 760.6575, rmsd is 44.275703
sib.fastconf.EADock3: Minimizing binding mode 2372, energy is 761.2594, rmsd is 10.675543
sib.fastconf.EADock3: Minimizing binding mode 2373, energy is 761.3125, rmsd is 44.976654
sib.fastconf.EADock3: Minimizing binding mode 2374, energy is 763.848, rmsd is 40.14755
sib.fastconf.EADock3: Minimizing binding mode 2375, energy is 763.9199, rmsd is 48.22283
sib.fastconf.EADock3: Minimizing binding mode 2376, energy is 764.28094, rmsd is 3.5825891
sib.fastconf.EADock3: Minimizing binding mode 2377, energy is 764.3609, rmsd is 14.514298
sib.fastconf.EADock3: Minimizing binding mode 2378, energy is 765.07184, rmsd is 12.813549
sib.fastconf.EADock3: Minimizing binding mode 2379, energy is 765.3285, rmsd is 43.104347
sib.fastconf.EADock3: Minimizing binding mode 2380, energy is 766.7611, rmsd is 43.567375
sib.fastconf.EADock3: Minimizing binding mode 2381, energy is 766.8121, rmsd is 30.789427
sib.fastconf.EADock3: Minimizing binding mode 2382, energy is 768.57605, rmsd is 28.660267
sib.fastconf.EADock3: Minimizing binding mode 2383, energy is 768.58923, rmsd is 64.25948
sib.fastconf.EADock3: Minimizing binding mode 2384, energy is 768.80176, rmsd is 32.078815
sib.fastconf.EADock3: Minimizing binding mode 2385, energy is 768.9993, rmsd is 64.53763
sib.fastconf.EADock3: Minimizing binding mode 2386, energy is 769.0328, rmsd is 30.593342
sib.fastconf.EADock3: Minimizing binding mode 2387, energy is 769.70496, rmsd is 45.305435
sib.fastconf.EADock3: Minimizing binding mode 2388, energy is 770.36725, rmsd is 42.86858
sib.fastconf.EADock3: Minimizing binding mode 2389, energy is 770.3814, rmsd is 46.91431
sib.fastconf.EADock3: Minimizing binding mode 2390, energy is 771.36914, rmsd is 29.544476
sib.fastconf.EADock3: Minimizing binding mode 2391, energy is 771.3807, rmsd is 46.86524
sib.fastconf.EADock3: Minimizing binding mode 2392, energy is 771.40564, rmsd is 32.514023
sib.fastconf.EADock3: Minimizing binding mode 2393, energy is 771.4672, rmsd is 46.193073
sib.fastconf.EADock3: Minimizing binding mode 2394, energy is 772.13837, rmsd is 45.688736
sib.fastconf.EADock3: Minimizing binding mode 2395, energy is 772.822, rmsd is 13.320164
sib.fastconf.EADock3: Minimizing binding mode 2396, energy is 773.5508, rmsd is 44.76264
sib.fastconf.EADock3: Minimizing binding mode 2397, energy is 773.59296, rmsd is 12.316447
sib.fastconf.EADock3: Minimizing binding mode 2398, energy is 774.18304, rmsd is 46.29414
sib.fastconf.EADock3: Minimizing binding mode 2399, energy is 774.55615, rmsd is 39.32773
sib.fastconf.EADock3: Minimizing binding mode 2400, energy is 775.98566, rmsd is 32.41562
sib.fastconf.EADock3: Minimizing binding mode 2401, energy is 776.0638, rmsd is 2.0840297
sib.fastconf.EADock3: Minimizing binding mode 2402, energy is 777.3463, rmsd is 39.39014
sib.fastconf.EADock3: Minimizing binding mode 2403, energy is 778.8444, rmsd is 11.534287
sib.fastconf.EADock3: Minimizing binding mode 2404, energy is 779.4858, rmsd is 11.651587
sib.fastconf.EADock3: Minimizing binding mode 2405, energy is 779.70514, rmsd is 26.154982
sib.fastconf.EADock3: Minimizing binding mode 2406, energy is 780.20465, rmsd is 30.898338
sib.fastconf.EADock3: Minimizing binding mode 2407, energy is 781.68756, rmsd is 29.596924
sib.fastconf.EADock3: Minimizing binding mode 2408, energy is 782.25366, rmsd is 12.884293
sib.fastconf.EADock3: Minimizing binding mode 2409, energy is 782.53015, rmsd is 44.079975
sib.fastconf.EADock3: Minimizing binding mode 2410, energy is 782.7295, rmsd is 46.948635
sib.fastconf.EADock3: Minimizing binding mode 2411, energy is 783.32465, rmsd is 63.94221
sib.fastconf.EADock3: Minimizing binding mode 2412, energy is 783.76263, rmsd is 39.322918
sib.fastconf.EADock3: Minimizing binding mode 2413, energy is 784.0258, rmsd is 32.362453
sib.fastconf.EADock3: Minimizing binding mode 2414, energy is 784.30756, rmsd is 38.320183
sib.fastconf.EADock3: Minimizing binding mode 2415, energy is 784.6444, rmsd is 40.479218
sib.fastconf.EADock3: Minimizing binding mode 2416, energy is 784.766, rmsd is 11.195692
sib.fastconf.EADock3: Minimizing binding mode 2417, energy is 785.3754, rmsd is 34.131638
sib.fastconf.EADock3: Minimizing binding mode 2418, energy is 786.66406, rmsd is 35.719246
sib.fastconf.EADock3: Minimizing binding mode 2419, energy is 787.2944, rmsd is 43.28346
sib.fastconf.EADock3: Minimizing binding mode 2420, energy is 787.34076, rmsd is 42.59936
sib.fastconf.EADock3: Minimizing binding mode 2421, energy is 787.75946, rmsd is 33.75865
sib.fastconf.EADock3: Minimizing binding mode 2422, energy is 788.588, rmsd is 43.82219
sib.fastconf.EADock3: Minimizing binding mode 2423, energy is 788.61847, rmsd is 44.229275
sib.fastconf.EADock3: Minimizing binding mode 2424, energy is 788.7911, rmsd is 37.771477
sib.fastconf.EADock3: Minimizing binding mode 2425, energy is 788.9605, rmsd is 39.03878
sib.fastconf.EADock3: Minimizing binding mode 2426, energy is 789.3427, rmsd is 39.86222
sib.fastconf.EADock3: Minimizing binding mode 2427, energy is 789.9127, rmsd is 42.532555
sib.fastconf.EADock3: Minimizing binding mode 2428, energy is 790.8018, rmsd is 32.40054
sib.fastconf.EADock3: Minimizing binding mode 2429, energy is 791.3374, rmsd is 45.28173
sib.fastconf.EADock3: Minimizing binding mode 2430, energy is 792.82623, rmsd is 38.096912
sib.fastconf.EADock3: Minimizing binding mode 2431, energy is 793.5888, rmsd is 39.009235
sib.fastconf.EADock3: Minimizing binding mode 2432, energy is 794.32776, rmsd is 41.47163
sib.fastconf.EADock3: Minimizing binding mode 2433, energy is 794.634, rmsd is 58.731354
sib.fastconf.EADock3: Minimizing binding mode 2434, energy is 794.86176, rmsd is 64.77052
sib.fastconf.EADock3: Minimizing binding mode 2435, energy is 794.9757, rmsd is 54.09441
sib.fastconf.EADock3: Minimizing binding mode 2436, energy is 795.28394, rmsd is 42.289455
sib.fastconf.EADock3: Minimizing binding mode 2437, energy is 795.55597, rmsd is 64.79246
sib.fastconf.EADock3: Minimizing binding mode 2438, energy is 795.5904, rmsd is 2.3977907
sib.fastconf.EADock3: Minimizing binding mode 2439, energy is 795.9123, rmsd is 45.63276
sib.fastconf.EADock3: Minimizing binding mode 2440, energy is 797.13043, rmsd is 32.705772
sib.fastconf.EADock3: Minimizing binding mode 2441, energy is 797.30896, rmsd is 33.10866
sib.fastconf.EADock3: Minimizing binding mode 2442, energy is 797.5095, rmsd is 48.92455
sib.fastconf.EADock3: Minimizing binding mode 2443, energy is 798.531, rmsd is 44.642372
sib.fastconf.EADock3: Minimizing binding mode 2444, energy is 798.8141, rmsd is 30.342491
sib.fastconf.EADock3: Minimizing binding mode 2445, energy is 801.3654, rmsd is 32.97947
sib.fastconf.EADock3: Minimizing binding mode 2446, energy is 801.94135, rmsd is 35.954216
sib.fastconf.EADock3: Minimizing binding mode 2447, energy is 802.28534, rmsd is 62.493565
sib.fastconf.EADock3: Minimizing binding mode 2448, energy is 802.3344, rmsd is 41.242126
sib.fastconf.EADock3: Minimizing binding mode 2449, energy is 802.71216, rmsd is 39.77457
sib.fastconf.EADock3: Minimizing binding mode 2450, energy is 802.76996, rmsd is 29.663408
sib.fastconf.EADock3: Minimizing binding mode 2451, energy is 803.5098, rmsd is 33.560436
sib.fastconf.EADock3: Minimizing binding mode 2452, energy is 803.90936, rmsd is 2.053699
sib.fastconf.EADock3: Minimizing binding mode 2453, energy is 805.3548, rmsd is 36.394974
sib.fastconf.EADock3: Minimizing binding mode 2454, energy is 805.5436, rmsd is 12.433302
sib.fastconf.EADock3: Minimizing binding mode 2455, energy is 805.7539, rmsd is 43.93227
sib.fastconf.EADock3: Minimizing binding mode 2456, energy is 805.96136, rmsd is 2.4490616
sib.fastconf.EADock3: Minimizing binding mode 2457, energy is 807.0151, rmsd is 30.748749
sib.fastconf.EADock3: Minimizing binding mode 2458, energy is 807.1282, rmsd is 65.96099
sib.fastconf.EADock3: Minimizing binding mode 2459, energy is 807.9039, rmsd is 12.240881
sib.fastconf.EADock3: Minimizing binding mode 2460, energy is 808.1628, rmsd is 29.978167
sib.fastconf.EADock3: Minimizing binding mode 2461, energy is 808.83594, rmsd is 37.500126
sib.fastconf.EADock3: Minimizing binding mode 2462, energy is 809.0669, rmsd is 37.338524
sib.fastconf.EADock3: Minimizing binding mode 2463, energy is 809.8009, rmsd is 9.6454
sib.fastconf.EADock3: Minimizing binding mode 2464, energy is 812.01245, rmsd is 40.68731
sib.fastconf.EADock3: Minimizing binding mode 2465, energy is 812.4054, rmsd is 33.452972
sib.fastconf.EADock3: Minimizing binding mode 2466, energy is 813.2611, rmsd is 13.014149
sib.fastconf.EADock3: Minimizing binding mode 2467, energy is 814.6732, rmsd is 34.59926
sib.fastconf.EADock3: Minimizing binding mode 2468, energy is 816.6831, rmsd is 11.344016
sib.fastconf.EADock3: Minimizing binding mode 2469, energy is 817.2772, rmsd is 33.538876
sib.fastconf.EADock3: Minimizing binding mode 2470, energy is 817.80695, rmsd is 31.256315
sib.fastconf.EADock3: Minimizing binding mode 2471, energy is 818.1484, rmsd is 35.23803
sib.fastconf.EADock3: Minimizing binding mode 2472, energy is 818.42847, rmsd is 64.94063
sib.fastconf.EADock3: Minimizing binding mode 2473, energy is 820.17566, rmsd is 9.292364
sib.fastconf.EADock3: Minimizing binding mode 2474, energy is 820.29785, rmsd is 64.36015
sib.fastconf.EADock3: Minimizing binding mode 2475, energy is 821.53064, rmsd is 33.030262
sib.fastconf.EADock3: Minimizing binding mode 2476, energy is 821.61426, rmsd is 33.23833
sib.fastconf.EADock3: Minimizing binding mode 2477, energy is 821.9168, rmsd is 14.080056
sib.fastconf.EADock3: Minimizing binding mode 2478, energy is 821.92706, rmsd is 54.620445
sib.fastconf.EADock3: Minimizing binding mode 2479, energy is 822.269, rmsd is 11.3336315
sib.fastconf.EADock3: Minimizing binding mode 2480, energy is 822.4998, rmsd is 55.039467
sib.fastconf.EADock3: Minimizing binding mode 2481, energy is 822.9269, rmsd is 30.200645
sib.fastconf.EADock3: Minimizing binding mode 2482, energy is 823.3594, rmsd is 48.061096
sib.fastconf.EADock3: Minimizing binding mode 2483, energy is 823.9039, rmsd is 65.77079
sib.fastconf.EADock3: Minimizing binding mode 2484, energy is 824.44836, rmsd is 12.743304
sib.fastconf.EADock3: Minimizing binding mode 2485, energy is 824.8273, rmsd is 33.48081
sib.fastconf.EADock3: Minimizing binding mode 2486, energy is 825.6538, rmsd is 30.505508
sib.fastconf.EADock3: Minimizing binding mode 2487, energy is 826.0644, rmsd is 32.515087
sib.fastconf.EADock3: Minimizing binding mode 2488, energy is 826.49005, rmsd is 34.606537
sib.fastconf.EADock3: Minimizing binding mode 2489, energy is 826.9527, rmsd is 9.647628
sib.fastconf.EADock3: Minimizing binding mode 2490, energy is 827.11774, rmsd is 45.564144
sib.fastconf.EADock3: Minimizing binding mode 2491, energy is 827.64526, rmsd is 10.928246
sib.fastconf.EADock3: Minimizing binding mode 2492, energy is 827.7121, rmsd is 40.435867
sib.fastconf.EADock3: Minimizing binding mode 2493, energy is 828.4891, rmsd is 30.803764
sib.fastconf.EADock3: Minimizing binding mode 2494, energy is 828.5312, rmsd is 39.849632
sib.fastconf.EADock3: Minimizing binding mode 2495, energy is 829.4823, rmsd is 33.15385
sib.fastconf.EADock3: Minimizing binding mode 2496, energy is 829.55725, rmsd is 64.02573
sib.fastconf.EADock3: Minimizing binding mode 2497, energy is 830.24426, rmsd is 38.720066
sib.fastconf.EADock3: Minimizing binding mode 2498, energy is 831.0704, rmsd is 34.997646
sib.fastconf.EADock3: Minimizing binding mode 2499, energy is 834.0273, rmsd is 45.68959
sib.fastconf.EADock3: Minimizing binding mode 2500, energy is 836.7976, rmsd is 28.776714
sib.fastconf.EADock3: Minimizing binding mode 2501, energy is 836.9579, rmsd is 2.644139
sib.fastconf.EADock3: Minimizing binding mode 2502, energy is 839.1588, rmsd is 2.4419172
sib.fastconf.EADock3: Minimizing binding mode 2503, energy is 840.349, rmsd is 54.00429
sib.fastconf.EADock3: Minimizing binding mode 2504, energy is 840.6651, rmsd is 31.635235
sib.fastconf.EADock3: Minimizing binding mode 2505, energy is 841.5678, rmsd is 12.599171
sib.fastconf.EADock3: Minimizing binding mode 2506, energy is 841.73016, rmsd is 12.250038
sib.fastconf.EADock3: Minimizing binding mode 2507, energy is 841.7324, rmsd is 41.357586
sib.fastconf.EADock3: Minimizing binding mode 2508, energy is 842.4229, rmsd is 37.743015
sib.fastconf.EADock3: Minimizing binding mode 2509, energy is 844.1047, rmsd is 44.307686
sib.fastconf.EADock3: Minimizing binding mode 2510, energy is 845.03296, rmsd is 11.526008
sib.fastconf.EADock3: Minimizing binding mode 2511, energy is 845.31854, rmsd is 34.717533
sib.fastconf.EADock3: Minimizing binding mode 2512, energy is 845.6761, rmsd is 37.65521
sib.fastconf.EADock3: Minimizing binding mode 2513, energy is 846.3502, rmsd is 47.29587
sib.fastconf.EADock3: Minimizing binding mode 2514, energy is 846.6023, rmsd is 65.20406
sib.fastconf.EADock3: Minimizing binding mode 2515, energy is 846.8539, rmsd is 31.877218
sib.fastconf.EADock3: Minimizing binding mode 2516, energy is 847.65564, rmsd is 32.83218
sib.fastconf.EADock3: Minimizing binding mode 2517, energy is 847.66235, rmsd is 41.167854
sib.fastconf.EADock3: Minimizing binding mode 2518, energy is 848.0703, rmsd is 45.627117
sib.fastconf.EADock3: Minimizing binding mode 2519, energy is 848.12067, rmsd is 42.844128
sib.fastconf.EADock3: Minimizing binding mode 2520, energy is 849.6763, rmsd is 30.599543
sib.fastconf.EADock3: Minimizing binding mode 2521, energy is 849.6796, rmsd is 30.029097
sib.fastconf.EADock3: Minimizing binding mode 2522, energy is 849.69574, rmsd is 32.544704
sib.fastconf.EADock3: Minimizing binding mode 2523, energy is 849.94995, rmsd is 66.35829
sib.fastconf.EADock3: Minimizing binding mode 2524, energy is 850.0757, rmsd is 10.133587
sib.fastconf.EADock3: Minimizing binding mode 2525, energy is 850.14264, rmsd is 41.40974
sib.fastconf.EADock3: Minimizing binding mode 2526, energy is 850.9154, rmsd is 13.405727
sib.fastconf.EADock3: Minimizing binding mode 2527, energy is 851.9858, rmsd is 44.356884
sib.fastconf.EADock3: Minimizing binding mode 2528, energy is 852.2213, rmsd is 45.64581
sib.fastconf.EADock3: Minimizing binding mode 2529, energy is 852.27167, rmsd is 2.913177
sib.fastconf.EADock3: Minimizing binding mode 2530, energy is 853.7877, rmsd is 13.555219
sib.fastconf.EADock3: Minimizing binding mode 2531, energy is 854.2726, rmsd is 13.539524
sib.fastconf.EADock3: Minimizing binding mode 2532, energy is 854.9079, rmsd is 36.86695
sib.fastconf.EADock3: Minimizing binding mode 2533, energy is 854.95807, rmsd is 39.12256
sib.fastconf.EADock3: Minimizing binding mode 2534, energy is 855.0349, rmsd is 42.31721
sib.fastconf.EADock3: Minimizing binding mode 2535, energy is 855.1204, rmsd is 52.65582
sib.fastconf.EADock3: Minimizing binding mode 2536, energy is 856.0402, rmsd is 48.42161
sib.fastconf.EADock3: Minimizing binding mode 2537, energy is 856.1141, rmsd is 35.70326
sib.fastconf.EADock3: Minimizing binding mode 2538, energy is 857.46326, rmsd is 46.557423
sib.fastconf.EADock3: Minimizing binding mode 2539, energy is 857.49023, rmsd is 38.628124
sib.fastconf.EADock3: Minimizing binding mode 2540, energy is 858.3454, rmsd is 12.807711
sib.fastconf.EADock3: Minimizing binding mode 2541, energy is 861.16595, rmsd is 40.853584
sib.fastconf.EADock3: Minimizing binding mode 2542, energy is 861.6681, rmsd is 1.9884112
sib.fastconf.EADock3: Minimizing binding mode 2543, energy is 863.436, rmsd is 44.984344
sib.fastconf.EADock3: Minimizing binding mode 2544, energy is 864.7236, rmsd is 25.807657
sib.fastconf.EADock3: Minimizing binding mode 2545, energy is 864.80927, rmsd is 12.715459
sib.fastconf.EADock3: Minimizing binding mode 2546, energy is 864.9743, rmsd is 55.28262
sib.fastconf.EADock3: Minimizing binding mode 2547, energy is 865.9411, rmsd is 46.263294
sib.fastconf.EADock3: Minimizing binding mode 2548, energy is 867.1235, rmsd is 65.84507
sib.fastconf.EADock3: Minimizing binding mode 2549, energy is 867.9325, rmsd is 30.622147
sib.fastconf.EADock3: Minimizing binding mode 2550, energy is 867.95557, rmsd is 29.826443
sib.fastconf.EADock3: Minimizing binding mode 2551, energy is 868.0988, rmsd is 3.0620735
sib.fastconf.EADock3: Minimizing binding mode 2552, energy is 868.92505, rmsd is 46.093998
sib.fastconf.EADock3: Minimizing binding mode 2553, energy is 869.3956, rmsd is 12.1758795
sib.fastconf.EADock3: Minimizing binding mode 2554, energy is 869.58496, rmsd is 32.910416
sib.fastconf.EADock3: Minimizing binding mode 2555, energy is 869.9527, rmsd is 33.81301
sib.fastconf.EADock3: Minimizing binding mode 2556, energy is 870.92914, rmsd is 67.04043
sib.fastconf.EADock3: Minimizing binding mode 2557, energy is 871.083, rmsd is 36.721653
sib.fastconf.EADock3: Minimizing binding mode 2558, energy is 871.1113, rmsd is 65.60121
sib.fastconf.EADock3: Minimizing binding mode 2559, energy is 871.48944, rmsd is 2.0089724
sib.fastconf.EADock3: Minimizing binding mode 2560, energy is 872.0251, rmsd is 34.26077
sib.fastconf.EADock3: Minimizing binding mode 2561, energy is 872.74, rmsd is 40.257732
sib.fastconf.EADock3: Minimizing binding mode 2562, energy is 874.2037, rmsd is 35.86781
sib.fastconf.EADock3: Minimizing binding mode 2563, energy is 874.9319, rmsd is 48.967464
sib.fastconf.EADock3: Minimizing binding mode 2564, energy is 875.0288, rmsd is 30.660614
sib.fastconf.EADock3: Minimizing binding mode 2565, energy is 875.0915, rmsd is 30.431705
sib.fastconf.EADock3: Minimizing binding mode 2566, energy is 875.2476, rmsd is 30.121304
sib.fastconf.EADock3: Minimizing binding mode 2567, energy is 875.3233, rmsd is 30.53084
sib.fastconf.EADock3: Minimizing binding mode 2568, energy is 875.58496, rmsd is 12.266031
sib.fastconf.EADock3: Minimizing binding mode 2569, energy is 876.4071, rmsd is 43.315052
sib.fastconf.EADock3: Minimizing binding mode 2570, energy is 877.2997, rmsd is 12.022639
sib.fastconf.EADock3: Minimizing binding mode 2571, energy is 877.4412, rmsd is 49.404133
sib.fastconf.EADock3: Minimizing binding mode 2572, energy is 879.9653, rmsd is 32.008343
sib.fastconf.EADock3: Minimizing binding mode 2573, energy is 880.4182, rmsd is 43.23922
sib.fastconf.EADock3: Minimizing binding mode 2574, energy is 880.9999, rmsd is 46.24255
sib.fastconf.EADock3: Minimizing binding mode 2575, energy is 881.44135, rmsd is 30.674965
sib.fastconf.EADock3: Minimizing binding mode 2576, energy is 882.3234, rmsd is 40.50181
sib.fastconf.EADock3: Minimizing binding mode 2577, energy is 882.5429, rmsd is 33.386604
sib.fastconf.EADock3: Minimizing binding mode 2578, energy is 882.8842, rmsd is 55.993393
sib.fastconf.EADock3: Minimizing binding mode 2579, energy is 883.3352, rmsd is 28.603968
sib.fastconf.EADock3: Minimizing binding mode 2580, energy is 883.3715, rmsd is 11.879426
sib.fastconf.EADock3: Minimizing binding mode 2581, energy is 883.8703, rmsd is 31.510101
sib.fastconf.EADock3: Minimizing binding mode 2582, energy is 884.1168, rmsd is 31.772942
sib.fastconf.EADock3: Minimizing binding mode 2583, energy is 884.87854, rmsd is 29.250784
sib.fastconf.EADock3: Minimizing binding mode 2584, energy is 885.36035, rmsd is 48.091255
sib.fastconf.EADock3: Minimizing binding mode 2585, energy is 885.58374, rmsd is 3.4615817
sib.fastconf.EADock3: Minimizing binding mode 2586, energy is 886.7732, rmsd is 29.990082
sib.fastconf.EADock3: Minimizing binding mode 2587, energy is 886.8999, rmsd is 37.44556
sib.fastconf.EADock3: Minimizing binding mode 2588, energy is 887.0549, rmsd is 15.252566
sib.fastconf.EADock3: Minimizing binding mode 2589, energy is 888.12024, rmsd is 65.5617
sib.fastconf.EADock3: Minimizing binding mode 2590, energy is 888.9022, rmsd is 13.632029
sib.fastconf.EADock3: Minimizing binding mode 2591, energy is 888.9376, rmsd is 2.0849557
sib.fastconf.EADock3: Minimizing binding mode 2592, energy is 889.65967, rmsd is 70.035034
sib.fastconf.EADock3: Minimizing binding mode 2593, energy is 890.3385, rmsd is 38.85318
sib.fastconf.EADock3: Minimizing binding mode 2594, energy is 890.83795, rmsd is 33.81916
sib.fastconf.EADock3: Minimizing binding mode 2595, energy is 890.93506, rmsd is 63.567554
sib.fastconf.EADock3: Minimizing binding mode 2596, energy is 892.335, rmsd is 64.16696
sib.fastconf.EADock3: Minimizing binding mode 2597, energy is 892.5001, rmsd is 11.893868
sib.fastconf.EADock3: Minimizing binding mode 2598, energy is 892.84534, rmsd is 35.716747
sib.fastconf.EADock3: Minimizing binding mode 2599, energy is 894.1525, rmsd is 28.216438
sib.fastconf.EADock3: Minimizing binding mode 2600, energy is 894.7085, rmsd is 34.91465
sib.fastconf.EADock3: Minimizing binding mode 2601, energy is 896.0867, rmsd is 48.611874
sib.fastconf.EADock3: Minimizing binding mode 2602, energy is 896.7452, rmsd is 37.6424
sib.fastconf.EADock3: Minimizing binding mode 2603, energy is 896.7493, rmsd is 32.536304
sib.fastconf.EADock3: Minimizing binding mode 2604, energy is 897.0719, rmsd is 55.25728
sib.fastconf.EADock3: Minimizing binding mode 2605, energy is 898.14307, rmsd is 33.93513
sib.fastconf.EADock3: Minimizing binding mode 2606, energy is 898.1991, rmsd is 33.156086
sib.fastconf.EADock3: Minimizing binding mode 2607, energy is 898.3255, rmsd is 45.01372
sib.fastconf.EADock3: Minimizing binding mode 2608, energy is 898.94775, rmsd is 37.579414
sib.fastconf.EADock3: Minimizing binding mode 2609, energy is 899.08136, rmsd is 10.4197235
sib.fastconf.EADock3: Minimizing binding mode 2610, energy is 899.7072, rmsd is 15.831738
sib.fastconf.EADock3: Minimizing binding mode 2611, energy is 899.77313, rmsd is 37.22491
sib.fastconf.EADock3: Minimizing binding mode 2612, energy is 899.97626, rmsd is 46.15658
sib.fastconf.EADock3: Minimizing binding mode 2613, energy is 900.035, rmsd is 38.950176
sib.fastconf.EADock3: Minimizing binding mode 2614, energy is 900.53314, rmsd is 3.6102936
sib.fastconf.EADock3: Minimizing binding mode 2615, energy is 900.94653, rmsd is 32.135693
sib.fastconf.EADock3: Minimizing binding mode 2616, energy is 901.28845, rmsd is 11.658092
sib.fastconf.EADock3: Minimizing binding mode 2617, energy is 901.70013, rmsd is 32.185383
sib.fastconf.EADock3: Minimizing binding mode 2618, energy is 902.1443, rmsd is 64.113945
sib.fastconf.EADock3: Minimizing binding mode 2619, energy is 902.49274, rmsd is 30.790144
sib.fastconf.EADock3: Minimizing binding mode 2620, energy is 904.0692, rmsd is 33.810795
sib.fastconf.EADock3: Minimizing binding mode 2621, energy is 904.78674, rmsd is 31.15088
sib.fastconf.EADock3: Minimizing binding mode 2622, energy is 904.92633, rmsd is 13.245425
sib.fastconf.EADock3: Minimizing binding mode 2623, energy is 905.2542, rmsd is 29.29625
sib.fastconf.EADock3: Minimizing binding mode 2624, energy is 905.3433, rmsd is 33.536007
sib.fastconf.EADock3: Minimizing binding mode 2625, energy is 907.4608, rmsd is 43.89472
sib.fastconf.EADock3: Minimizing binding mode 2626, energy is 907.95715, rmsd is 43.060013
sib.fastconf.EADock3: Minimizing binding mode 2627, energy is 910.50757, rmsd is 43.39387
sib.fastconf.EADock3: Minimizing binding mode 2628, energy is 910.8945, rmsd is 3.3788347
sib.fastconf.EADock3: Minimizing binding mode 2629, energy is 911.4443, rmsd is 45.718674
sib.fastconf.EADock3: Minimizing binding mode 2630, energy is 912.7202, rmsd is 63.009388
sib.fastconf.EADock3: Minimizing binding mode 2631, energy is 914.48914, rmsd is 31.751144
sib.fastconf.EADock3: Minimizing binding mode 2632, energy is 914.5626, rmsd is 42.211746
sib.fastconf.EADock3: Minimizing binding mode 2633, energy is 915.9208, rmsd is 30.11161
sib.fastconf.EADock3: Minimizing binding mode 2634, energy is 916.0994, rmsd is 36.62542
sib.fastconf.EADock3: Minimizing binding mode 2635, energy is 916.7607, rmsd is 35.49854
sib.fastconf.EADock3: Minimizing binding mode 2636, energy is 917.17017, rmsd is 46.724094
sib.fastconf.EADock3: Minimizing binding mode 2637, energy is 918.9579, rmsd is 54.212418
sib.fastconf.EADock3: Minimizing binding mode 2638, energy is 919.1453, rmsd is 14.963486
sib.fastconf.EADock3: Minimizing binding mode 2639, energy is 920.0958, rmsd is 33.306572
sib.fastconf.EADock3: Minimizing binding mode 2640, energy is 920.6524, rmsd is 63.286884
sib.fastconf.EADock3: Minimizing binding mode 2641, energy is 920.9004, rmsd is 36.05656
sib.fastconf.EADock3: Minimizing binding mode 2642, energy is 921.82983, rmsd is 35.841286
sib.fastconf.EADock3: Minimizing binding mode 2643, energy is 921.87756, rmsd is 66.63927
sib.fastconf.EADock3: Minimizing binding mode 2644, energy is 922.3044, rmsd is 37.52031
sib.fastconf.EADock3: Minimizing binding mode 2645, energy is 923.86176, rmsd is 30.07904
sib.fastconf.EADock3: Minimizing binding mode 2646, energy is 923.98944, rmsd is 2.776258
sib.fastconf.EADock3: Minimizing binding mode 2647, energy is 924.632, rmsd is 44.04865
sib.fastconf.EADock3: Minimizing binding mode 2648, energy is 926.0527, rmsd is 2.8310196
sib.fastconf.EADock3: Minimizing binding mode 2649, energy is 926.8952, rmsd is 65.767654
sib.fastconf.EADock3: Minimizing binding mode 2650, energy is 927.0184, rmsd is 39.12691
sib.fastconf.EADock3: Minimizing binding mode 2651, energy is 927.73114, rmsd is 44.517082
sib.fastconf.EADock3: Minimizing binding mode 2652, energy is 928.6467, rmsd is 32.82168
sib.fastconf.EADock3: Minimizing binding mode 2653, energy is 928.66504, rmsd is 29.801802
sib.fastconf.EADock3: Minimizing binding mode 2654, energy is 929.6637, rmsd is 2.5570157
sib.fastconf.EADock3: Minimizing binding mode 2655, energy is 929.74854, rmsd is 37.482895
sib.fastconf.EADock3: Minimizing binding mode 2656, energy is 930.4038, rmsd is 34.835304
sib.fastconf.EADock3: Minimizing binding mode 2657, energy is 930.6396, rmsd is 29.69171
sib.fastconf.EADock3: Minimizing binding mode 2658, energy is 931.17267, rmsd is 64.408134
sib.fastconf.EADock3: Minimizing binding mode 2659, energy is 931.4133, rmsd is 41.44841
sib.fastconf.EADock3: Minimizing binding mode 2660, energy is 931.5635, rmsd is 63.979332
sib.fastconf.EADock3: Minimizing binding mode 2661, energy is 931.8886, rmsd is 2.2297428
sib.fastconf.EADock3: Minimizing binding mode 2662, energy is 932.7165, rmsd is 18.843721
sib.fastconf.EADock3: Minimizing binding mode 2663, energy is 933.3412, rmsd is 65.875114
sib.fastconf.EADock3: Minimizing binding mode 2664, energy is 933.5204, rmsd is 2.739829
sib.fastconf.EADock3: Minimizing binding mode 2665, energy is 934.2517, rmsd is 67.03742
sib.fastconf.EADock3: Minimizing binding mode 2666, energy is 934.569, rmsd is 3.0549955
sib.fastconf.EADock3: Minimizing binding mode 2667, energy is 935.55585, rmsd is 43.71718
sib.fastconf.EADock3: Minimizing binding mode 2668, energy is 935.65985, rmsd is 31.430946
sib.fastconf.EADock3: Minimizing binding mode 2669, energy is 935.78015, rmsd is 64.81493
sib.fastconf.EADock3: Minimizing binding mode 2670, energy is 936.54584, rmsd is 37.783012
sib.fastconf.EADock3: Minimizing binding mode 2671, energy is 936.6842, rmsd is 34.932518
sib.fastconf.EADock3: Minimizing binding mode 2672, energy is 937.8087, rmsd is 49.18952
sib.fastconf.EADock3: Minimizing binding mode 2673, energy is 939.4136, rmsd is 12.768981
sib.fastconf.EADock3: Minimizing binding mode 2674, energy is 940.82404, rmsd is 41.66662
sib.fastconf.EADock3: Minimizing binding mode 2675, energy is 941.00275, rmsd is 3.3923547
sib.fastconf.EADock3: Minimizing binding mode 2676, energy is 941.7046, rmsd is 47.6646
sib.fastconf.EADock3: Minimizing binding mode 2677, energy is 943.60376, rmsd is 31.982122
sib.fastconf.EADock3: Minimizing binding mode 2678, energy is 943.96136, rmsd is 30.748995
sib.fastconf.EADock3: Minimizing binding mode 2679, energy is 944.70496, rmsd is 44.239006
sib.fastconf.EADock3: Minimizing binding mode 2680, energy is 946.3602, rmsd is 43.40013
sib.fastconf.EADock3: Minimizing binding mode 2681, energy is 946.9943, rmsd is 13.287604
sib.fastconf.EADock3: Minimizing binding mode 2682, energy is 948.3507, rmsd is 54.426556
sib.fastconf.EADock3: Minimizing binding mode 2683, energy is 949.2526, rmsd is 30.727842
sib.fastconf.EADock3: Minimizing binding mode 2684, energy is 950.5241, rmsd is 64.24458
sib.fastconf.EADock3: Minimizing binding mode 2685, energy is 950.8073, rmsd is 28.82669
sib.fastconf.EADock3: Minimizing binding mode 2686, energy is 951.17303, rmsd is 41.763573
sib.fastconf.EADock3: Minimizing binding mode 2687, energy is 951.4806, rmsd is 63.30079
sib.fastconf.EADock3: Minimizing binding mode 2688, energy is 951.66425, rmsd is 47.852608
sib.fastconf.EADock3: Minimizing binding mode 2689, energy is 952.3079, rmsd is 29.664965
sib.fastconf.EADock3: Minimizing binding mode 2690, energy is 953.49506, rmsd is 42.718376
sib.fastconf.EADock3: Minimizing binding mode 2691, energy is 953.6293, rmsd is 41.114346
sib.fastconf.EADock3: Minimizing binding mode 2692, energy is 953.9232, rmsd is 2.3993263
sib.fastconf.EADock3: Minimizing binding mode 2693, energy is 954.0369, rmsd is 66.64336
sib.fastconf.EADock3: Minimizing binding mode 2694, energy is 954.57336, rmsd is 48.948025
sib.fastconf.EADock3: Minimizing binding mode 2695, energy is 954.6035, rmsd is 44.3879
sib.fastconf.EADock3: Minimizing binding mode 2696, energy is 954.64026, rmsd is 55.132973
sib.fastconf.EADock3: Minimizing binding mode 2697, energy is 954.74774, rmsd is 13.395783
sib.fastconf.EADock3: Minimizing binding mode 2698, energy is 954.8058, rmsd is 35.943657
sib.fastconf.EADock3: Minimizing binding mode 2699, energy is 956.3095, rmsd is 30.18611
sib.fastconf.EADock3: Minimizing binding mode 2700, energy is 957.085, rmsd is 1.8382906
sib.fastconf.EADock3: Minimizing binding mode 2701, energy is 957.1074, rmsd is 3.2334113
sib.fastconf.EADock3: Minimizing binding mode 2702, energy is 957.78845, rmsd is 36.841057
sib.fastconf.EADock3: Minimizing binding mode 2703, energy is 959.10095, rmsd is 29.201262
sib.fastconf.EADock3: Minimizing binding mode 2704, energy is 959.5021, rmsd is 38.10931
sib.fastconf.EADock3: Minimizing binding mode 2705, energy is 959.62286, rmsd is 20.482817
sib.fastconf.EADock3: Minimizing binding mode 2706, energy is 960.15204, rmsd is 42.766026
sib.fastconf.EADock3: Minimizing binding mode 2707, energy is 960.6841, rmsd is 38.583088
sib.fastconf.EADock3: Minimizing binding mode 2708, energy is 961.76434, rmsd is 44.27607
sib.fastconf.EADock3: Minimizing binding mode 2709, energy is 961.993, rmsd is 52.52684
sib.fastconf.EADock3: Minimizing binding mode 2710, energy is 963.51697, rmsd is 29.871773
sib.fastconf.EADock3: Minimizing binding mode 2711, energy is 964.1249, rmsd is 32.8607
sib.fastconf.EADock3: Minimizing binding mode 2712, energy is 964.43945, rmsd is 50.067383
sib.fastconf.EADock3: Minimizing binding mode 2713, energy is 964.7084, rmsd is 39.191505
sib.fastconf.EADock3: Minimizing binding mode 2714, energy is 964.8601, rmsd is 47.062843
sib.fastconf.EADock3: Minimizing binding mode 2715, energy is 965.59906, rmsd is 11.951133
sib.fastconf.EADock3: Minimizing binding mode 2716, energy is 965.8027, rmsd is 13.044403
sib.fastconf.EADock3: Minimizing binding mode 2717, energy is 966.27826, rmsd is 31.595444
sib.fastconf.EADock3: Minimizing binding mode 2718, energy is 968.3318, rmsd is 41.60907
sib.fastconf.EADock3: Minimizing binding mode 2719, energy is 968.40643, rmsd is 39.502357
sib.fastconf.EADock3: Minimizing binding mode 2720, energy is 968.6007, rmsd is 31.320118
sib.fastconf.EADock3: Minimizing binding mode 2721, energy is 968.60455, rmsd is 32.79129
sib.fastconf.EADock3: Minimizing binding mode 2722, energy is 968.8121, rmsd is 63.393555
sib.fastconf.EADock3: Minimizing binding mode 2723, energy is 969.11084, rmsd is 12.195394
sib.fastconf.EADock3: Minimizing binding mode 2724, energy is 969.8013, rmsd is 12.69171
sib.fastconf.EADock3: Minimizing binding mode 2725, energy is 970.19275, rmsd is 65.07009
sib.fastconf.EADock3: Minimizing binding mode 2726, energy is 970.491, rmsd is 45.48653
sib.fastconf.EADock3: Minimizing binding mode 2727, energy is 970.7051, rmsd is 64.50542
sib.fastconf.EADock3: Minimizing binding mode 2728, energy is 973.5766, rmsd is 10.696691
sib.fastconf.EADock3: Minimizing binding mode 2729, energy is 973.9737, rmsd is 43.666782
sib.fastconf.EADock3: Minimizing binding mode 2730, energy is 974.16693, rmsd is 48.020264
sib.fastconf.EADock3: Minimizing binding mode 2731, energy is 974.3566, rmsd is 45.135235
sib.fastconf.EADock3: Minimizing binding mode 2732, energy is 974.7226, rmsd is 34.733444
sib.fastconf.EADock3: Minimizing binding mode 2733, energy is 976.3623, rmsd is 65.71264
sib.fastconf.EADock3: Minimizing binding mode 2734, energy is 976.38715, rmsd is 32.6503
sib.fastconf.EADock3: Minimizing binding mode 2735, energy is 977.1036, rmsd is 65.001495
sib.fastconf.EADock3: Minimizing binding mode 2736, energy is 977.38495, rmsd is 28.03155
sib.fastconf.EADock3: Minimizing binding mode 2737, energy is 978.0232, rmsd is 44.668053
sib.fastconf.EADock3: Minimizing binding mode 2738, energy is 978.6253, rmsd is 65.77814
sib.fastconf.EADock3: Minimizing binding mode 2739, energy is 979.02637, rmsd is 30.632675
sib.fastconf.EADock3: Minimizing binding mode 2740, energy is 979.433, rmsd is 32.89459
sib.fastconf.EADock3: Minimizing binding mode 2741, energy is 984.2631, rmsd is 63.578712
sib.fastconf.EADock3: Minimizing binding mode 2742, energy is 985.4428, rmsd is 31.287746
sib.fastconf.EADock3: Minimizing binding mode 2743, energy is 985.68726, rmsd is 66.00873
sib.fastconf.EADock3: Minimizing binding mode 2744, energy is 986.2688, rmsd is 43.721466
sib.fastconf.EADock3: Minimizing binding mode 2745, energy is 986.93964, rmsd is 12.117923
sib.fastconf.EADock3: Minimizing binding mode 2746, energy is 987.35516, rmsd is 33.622066
sib.fastconf.EADock3: Minimizing binding mode 2747, energy is 989.2749, rmsd is 45.365463
sib.fastconf.EADock3: Minimizing binding mode 2748, energy is 990.3293, rmsd is 29.960087
sib.fastconf.EADock3: Minimizing binding mode 2749, energy is 990.99774, rmsd is 41.330814
sib.fastconf.EADock3: Minimizing binding mode 2750, energy is 991.26355, rmsd is 41.013504
sib.fastconf.EADock3: Minimizing binding mode 2751, energy is 991.2695, rmsd is 2.9719021
sib.fastconf.EADock3: Minimizing binding mode 2752, energy is 993.0367, rmsd is 35.033485
sib.fastconf.EADock3: Minimizing binding mode 2753, energy is 993.0786, rmsd is 67.791466
sib.fastconf.EADock3: Minimizing binding mode 2754, energy is 993.26276, rmsd is 42.39754
sib.fastconf.EADock3: Minimizing binding mode 2755, energy is 993.346, rmsd is 11.367068
sib.fastconf.EADock3: Minimizing binding mode 2756, energy is 993.5116, rmsd is 41.534096
sib.fastconf.EADock3: Minimizing binding mode 2757, energy is 994.396, rmsd is 64.60324
sib.fastconf.EADock3: Minimizing binding mode 2758, energy is 995.1925, rmsd is 34.10772
sib.fastconf.EADock3: Minimizing binding mode 2759, energy is 995.7636, rmsd is 3.0391178
sib.fastconf.EADock3: Minimizing binding mode 2760, energy is 995.9362, rmsd is 48.458443
sib.fastconf.EADock3: Minimizing binding mode 2761, energy is 996.0508, rmsd is 35.176296
sib.fastconf.EADock3: Minimizing binding mode 2762, energy is 997.29065, rmsd is 1.9723518
sib.fastconf.EADock3: Minimizing binding mode 2763, energy is 997.61475, rmsd is 3.006696
sib.fastconf.EADock3: Minimizing binding mode 2764, energy is 998.96857, rmsd is 35.592403
sib.fastconf.EADock3: Minimizing binding mode 2765, energy is 999.12415, rmsd is 13.266973
sib.fastconf.EADock3: Minimizing binding mode 2766, energy is 1000.05457, rmsd is 48.725307
sib.fastconf.EADock3: Minimizing binding mode 2767, energy is 1000.0604, rmsd is 48.239754
sib.fastconf.EADock3: Minimizing binding mode 2768, energy is 1000.97534, rmsd is 45.932735
sib.fastconf.EADock3: Minimizing binding mode 2769, energy is 1001.843, rmsd is 31.935802
sib.fastconf.EADock3: Minimizing binding mode 2770, energy is 1002.4761, rmsd is 44.53947
sib.fastconf.EADock3: Minimizing binding mode 2771, energy is 1002.4892, rmsd is 45.049313
sib.fastconf.EADock3: Minimizing binding mode 2772, energy is 1002.6958, rmsd is 46.900124
sib.fastconf.EADock3: Minimizing binding mode 2773, energy is 1003.23456, rmsd is 35.026737
sib.fastconf.EADock3: Minimizing binding mode 2774, energy is 1003.8342, rmsd is 14.154262
sib.fastconf.EADock3: Minimizing binding mode 2775, energy is 1005.6647, rmsd is 37.4877
sib.fastconf.EADock3: Minimizing binding mode 2776, energy is 1005.838, rmsd is 63.96552
sib.fastconf.EADock3: Minimizing binding mode 2777, energy is 1006.1452, rmsd is 42.224785
sib.fastconf.EADock3: Minimizing binding mode 2778, energy is 1007.81665, rmsd is 47.45383
sib.fastconf.EADock3: Minimizing binding mode 2779, energy is 1008.07025, rmsd is 64.87336
sib.fastconf.EADock3: Minimizing binding mode 2780, energy is 1009.3765, rmsd is 33.382195
sib.fastconf.EADock3: Minimizing binding mode 2781, energy is 1009.6014, rmsd is 50.97623
sib.fastconf.EADock3: Minimizing binding mode 2782, energy is 1010.11615, rmsd is 13.878207
sib.fastconf.EADock3: Minimizing binding mode 2783, energy is 1010.74854, rmsd is 45.315323
sib.fastconf.EADock3: Minimizing binding mode 2784, energy is 1011.6037, rmsd is 10.62193
sib.fastconf.EADock3: Minimizing binding mode 2785, energy is 1012.5809, rmsd is 40.20355
sib.fastconf.EADock3: Minimizing binding mode 2786, energy is 1013.43054, rmsd is 45.134575
sib.fastconf.EADock3: Minimizing binding mode 2787, energy is 1013.79565, rmsd is 30.617014
sib.fastconf.EADock3: Minimizing binding mode 2788, energy is 1014.14905, rmsd is 38.69546
sib.fastconf.EADock3: Minimizing binding mode 2789, energy is 1016.96375, rmsd is 43.30829
sib.fastconf.EADock3: Minimizing binding mode 2790, energy is 1018.078, rmsd is 36.88479
sib.fastconf.EADock3: Minimizing binding mode 2791, energy is 1018.2227, rmsd is 44.554276
sib.fastconf.EADock3: Minimizing binding mode 2792, energy is 1019.1034, rmsd is 30.98652
sib.fastconf.EADock3: Minimizing binding mode 2793, energy is 1019.79266, rmsd is 30.439514
sib.fastconf.EADock3: Minimizing binding mode 2794, energy is 1020.0422, rmsd is 42.023212
sib.fastconf.EADock3: Minimizing binding mode 2795, energy is 1020.92773, rmsd is 31.833118
sib.fastconf.EADock3: Minimizing binding mode 2796, energy is 1021.83215, rmsd is 29.143726
sib.fastconf.EADock3: Minimizing binding mode 2797, energy is 1021.98083, rmsd is 32.43487
sib.fastconf.EADock3: Minimizing binding mode 2798, energy is 1022.2087, rmsd is 13.622182
sib.fastconf.EADock3: Minimizing binding mode 2799, energy is 1022.2753, rmsd is 48.49509
sib.fastconf.EADock3: Minimizing binding mode 2800, energy is 1022.7531, rmsd is 39.17469
sib.fastconf.EADock3: Minimizing binding mode 2801, energy is 1022.8262, rmsd is 49.049088
sib.fastconf.EADock3: Minimizing binding mode 2802, energy is 1023.74243, rmsd is 55.82082
sib.fastconf.EADock3: Minimizing binding mode 2803, energy is 1023.9229, rmsd is 34.09413
sib.fastconf.EADock3: Minimizing binding mode 2804, energy is 1025.2032, rmsd is 30.117643
sib.fastconf.EADock3: Minimizing binding mode 2805, energy is 1025.4133, rmsd is 31.122705
sib.fastconf.EADock3: Minimizing binding mode 2806, energy is 1025.5104, rmsd is 53.876053
sib.fastconf.EADock3: Minimizing binding mode 2807, energy is 1025.9517, rmsd is 35.86304
sib.fastconf.EADock3: Minimizing binding mode 2808, energy is 1027.0782, rmsd is 12.551935
sib.fastconf.EADock3: Minimizing binding mode 2809, energy is 1028.005, rmsd is 35.777924
sib.fastconf.EADock3: Minimizing binding mode 2810, energy is 1028.129, rmsd is 42.212543
sib.fastconf.EADock3: Minimizing binding mode 2811, energy is 1028.6841, rmsd is 14.101649
sib.fastconf.EADock3: Minimizing binding mode 2812, energy is 1029.288, rmsd is 13.815826
sib.fastconf.EADock3: Minimizing binding mode 2813, energy is 1029.5349, rmsd is 43.013653
sib.fastconf.EADock3: Minimizing binding mode 2814, energy is 1030.0454, rmsd is 54.01848
sib.fastconf.EADock3: Minimizing binding mode 2815, energy is 1030.5968, rmsd is 31.111822
sib.fastconf.EADock3: Minimizing binding mode 2816, energy is 1032.0674, rmsd is 14.114355
sib.fastconf.EADock3: Minimizing binding mode 2817, energy is 1032.6195, rmsd is 31.323456
sib.fastconf.EADock3: Minimizing binding mode 2818, energy is 1034.7913, rmsd is 51.481453
sib.fastconf.EADock3: Minimizing binding mode 2819, energy is 1035.4585, rmsd is 45.443497
sib.fastconf.EADock3: Minimizing binding mode 2820, energy is 1035.5844, rmsd is 30.602072
sib.fastconf.EADock3: Minimizing binding mode 2821, energy is 1035.8589, rmsd is 48.155106
sib.fastconf.EADock3: Minimizing binding mode 2822, energy is 1036.2291, rmsd is 42.414734
sib.fastconf.EADock3: Minimizing binding mode 2823, energy is 1036.4536, rmsd is 46.165833
sib.fastconf.EADock3: Minimizing binding mode 2824, energy is 1036.7897, rmsd is 65.62323
sib.fastconf.EADock3: Minimizing binding mode 2825, energy is 1036.9777, rmsd is 44.391785
sib.fastconf.EADock3: Minimizing binding mode 2826, energy is 1038.4799, rmsd is 11.550209
sib.fastconf.EADock3: Minimizing binding mode 2827, energy is 1038.4829, rmsd is 30.967213
sib.fastconf.EADock3: Minimizing binding mode 2828, energy is 1039.13, rmsd is 47.17183
sib.fastconf.EADock3: Minimizing binding mode 2829, energy is 1039.527, rmsd is 32.803955
sib.fastconf.EADock3: Minimizing binding mode 2830, energy is 1040.3654, rmsd is 43.857338
sib.fastconf.EADock3: Minimizing binding mode 2831, energy is 1040.5305, rmsd is 54.399796
sib.fastconf.EADock3: Minimizing binding mode 2832, energy is 1042.1583, rmsd is 36.69581
sib.fastconf.EADock3: Minimizing binding mode 2833, energy is 1042.9094, rmsd is 11.33467
sib.fastconf.EADock3: Minimizing binding mode 2834, energy is 1043.1406, rmsd is 13.598362
sib.fastconf.EADock3: Minimizing binding mode 2835, energy is 1043.9208, rmsd is 31.384115
sib.fastconf.EADock3: Minimizing binding mode 2836, energy is 1044.2993, rmsd is 14.81739
sib.fastconf.EADock3: Minimizing binding mode 2837, energy is 1045.3965, rmsd is 48.24487
sib.fastconf.EADock3: Minimizing binding mode 2838, energy is 1047.068, rmsd is 64.05087
sib.fastconf.EADock3: Minimizing binding mode 2839, energy is 1047.7213, rmsd is 36.61978
sib.fastconf.EADock3: Minimizing binding mode 2840, energy is 1048.3003, rmsd is 40.66915
sib.fastconf.EADock3: Minimizing binding mode 2841, energy is 1049.9294, rmsd is 49.143257
sib.fastconf.EADock3: Minimizing binding mode 2842, energy is 1050.9299, rmsd is 54.6882
sib.fastconf.EADock3: Minimizing binding mode 2843, energy is 1051.375, rmsd is 64.49013
sib.fastconf.EADock3: Minimizing binding mode 2844, energy is 1051.5402, rmsd is 64.86498
sib.fastconf.EADock3: Minimizing binding mode 2845, energy is 1053.0771, rmsd is 2.9837258
sib.fastconf.EADock3: Minimizing binding mode 2846, energy is 1053.1045, rmsd is 29.833948
sib.fastconf.EADock3: Minimizing binding mode 2847, energy is 1054.3663, rmsd is 2.667377
sib.fastconf.EADock3: Minimizing binding mode 2848, energy is 1054.7397, rmsd is 32.696056
sib.fastconf.EADock3: Minimizing binding mode 2849, energy is 1054.7544, rmsd is 47.01251
sib.fastconf.EADock3: Minimizing binding mode 2850, energy is 1055.9342, rmsd is 69.173584
sib.fastconf.EADock3: Minimizing binding mode 2851, energy is 1055.9388, rmsd is 46.946304
sib.fastconf.EADock3: Minimizing binding mode 2852, energy is 1055.945, rmsd is 33.59721
sib.fastconf.EADock3: Minimizing binding mode 2853, energy is 1056.2738, rmsd is 34.34708
sib.fastconf.EADock3: Minimizing binding mode 2854, energy is 1060.3323, rmsd is 12.420102
sib.fastconf.EADock3: Minimizing binding mode 2855, energy is 1060.6039, rmsd is 11.37546
sib.fastconf.EADock3: Minimizing binding mode 2856, energy is 1060.9592, rmsd is 68.45923
sib.fastconf.EADock3: Minimizing binding mode 2857, energy is 1063.3551, rmsd is 14.533393
sib.fastconf.EADock3: Minimizing binding mode 2858, energy is 1063.4893, rmsd is 41.155018
sib.fastconf.EADock3: Minimizing binding mode 2859, energy is 1064.075, rmsd is 46.557213
sib.fastconf.EADock3: Minimizing binding mode 2860, energy is 1064.6802, rmsd is 42.97766
sib.fastconf.EADock3: Minimizing binding mode 2861, energy is 1065.7628, rmsd is 48.462486
sib.fastconf.EADock3: Minimizing binding mode 2862, energy is 1067.2327, rmsd is 2.716654
sib.fastconf.EADock3: Minimizing binding mode 2863, energy is 1068.5702, rmsd is 45.774612
sib.fastconf.EADock3: Minimizing binding mode 2864, energy is 1069.701, rmsd is 37.037445
sib.fastconf.EADock3: Minimizing binding mode 2865, energy is 1069.9006, rmsd is 43.89284
sib.fastconf.EADock3: Minimizing binding mode 2866, energy is 1070.0117, rmsd is 46.317463
sib.fastconf.EADock3: Minimizing binding mode 2867, energy is 1070.2191, rmsd is 64.54159
sib.fastconf.EADock3: Minimizing binding mode 2868, energy is 1070.6456, rmsd is 3.4814432
sib.fastconf.EADock3: Minimizing binding mode 2869, energy is 1070.8502, rmsd is 31.58896
sib.fastconf.EADock3: Minimizing binding mode 2870, energy is 1070.858, rmsd is 14.328201
sib.fastconf.EADock3: Minimizing binding mode 2871, energy is 1072.638, rmsd is 34.057373
sib.fastconf.EADock3: Minimizing binding mode 2872, energy is 1072.7664, rmsd is 31.272982
sib.fastconf.EADock3: Minimizing binding mode 2873, energy is 1073.7644, rmsd is 45.362255
sib.fastconf.EADock3: Minimizing binding mode 2874, energy is 1073.8077, rmsd is 31.720596
sib.fastconf.EADock3: Minimizing binding mode 2875, energy is 1075.3154, rmsd is 31.770699
sib.fastconf.EADock3: Minimizing binding mode 2876, energy is 1077.3253, rmsd is 1.4287082
sib.fastconf.EADock3: Minimizing binding mode 2877, energy is 1078.2855, rmsd is 2.5786686
sib.fastconf.EADock3: Minimizing binding mode 2878, energy is 1078.5234, rmsd is 12.769124
sib.fastconf.EADock3: Minimizing binding mode 2879, energy is 1079.113, rmsd is 52.766907
sib.fastconf.EADock3: Minimizing binding mode 2880, energy is 1079.7133, rmsd is 45.345722
sib.fastconf.EADock3: Minimizing binding mode 2881, energy is 1079.9197, rmsd is 45.713947
sib.fastconf.EADock3: Minimizing binding mode 2882, energy is 1080.1399, rmsd is 14.530775
sib.fastconf.EADock3: Minimizing binding mode 2883, energy is 1080.8987, rmsd is 35.08685
sib.fastconf.EADock3: Minimizing binding mode 2884, energy is 1081.7086, rmsd is 36.331924
sib.fastconf.EADock3: Minimizing binding mode 2885, energy is 1082.5132, rmsd is 37.365417
sib.fastconf.EADock3: Minimizing binding mode 2886, energy is 1084.1989, rmsd is 14.087059
sib.fastconf.EADock3: Minimizing binding mode 2887, energy is 1085.8129, rmsd is 45.55311
sib.fastconf.EADock3: Minimizing binding mode 2888, energy is 1085.8723, rmsd is 65.983345
sib.fastconf.EADock3: Minimizing binding mode 2889, energy is 1086.0802, rmsd is 54.57322
sib.fastconf.EADock3: Minimizing binding mode 2890, energy is 1086.5627, rmsd is 12.56537
sib.fastconf.EADock3: Minimizing binding mode 2891, energy is 1086.5679, rmsd is 44.989296
sib.fastconf.EADock3: Minimizing binding mode 2892, energy is 1087.7168, rmsd is 31.681456
sib.fastconf.EADock3: Minimizing binding mode 2893, energy is 1088.0498, rmsd is 29.661545
sib.fastconf.EADock3: Minimizing binding mode 2894, energy is 1088.2659, rmsd is 54.166157
sib.fastconf.EADock3: Minimizing binding mode 2895, energy is 1090.1083, rmsd is 58.74322
sib.fastconf.EADock3: Minimizing binding mode 2896, energy is 1091.8752, rmsd is 46.32428
sib.fastconf.EADock3: Minimizing binding mode 2897, energy is 1094.4971, rmsd is 40.465614
sib.fastconf.EADock3: Minimizing binding mode 2898, energy is 1094.7802, rmsd is 31.556864
sib.fastconf.EADock3: Minimizing binding mode 2899, energy is 1095.1415, rmsd is 1.2073811
sib.fastconf.EADock3: Minimizing binding mode 2900, energy is 1096.3473, rmsd is 14.898422
sib.fastconf.EADock3: Minimizing binding mode 2901, energy is 1096.4174, rmsd is 48.575962
sib.fastconf.EADock3: Minimizing binding mode 2902, energy is 1096.9686, rmsd is 29.971256
sib.fastconf.EADock3: Minimizing binding mode 2903, energy is 1099.6469, rmsd is 38.914646
sib.fastconf.EADock3: Minimizing binding mode 2904, energy is 1099.6876, rmsd is 36.165062
sib.fastconf.EADock3: Minimizing binding mode 2905, energy is 1100.0327, rmsd is 67.32386
sib.fastconf.EADock3: Minimizing binding mode 2906, energy is 1100.1224, rmsd is 29.925898
sib.fastconf.EADock3: Minimizing binding mode 2907, energy is 1101.425, rmsd is 34.28313
sib.fastconf.EADock3: Minimizing binding mode 2908, energy is 1101.9448, rmsd is 32.140297
sib.fastconf.EADock3: Minimizing binding mode 2909, energy is 1102.3022, rmsd is 41.847084
sib.fastconf.EADock3: Minimizing binding mode 2910, energy is 1103.9109, rmsd is 43.12258
sib.fastconf.EADock3: Minimizing binding mode 2911, energy is 1105.561, rmsd is 39.90703
sib.fastconf.EADock3: Minimizing binding mode 2912, energy is 1105.8793, rmsd is 42.41245
sib.fastconf.EADock3: Minimizing binding mode 2913, energy is 1107.2118, rmsd is 2.4432604
sib.fastconf.EADock3: Minimizing binding mode 2914, energy is 1109.3766, rmsd is 46.698303
sib.fastconf.EADock3: Minimizing binding mode 2915, energy is 1109.6102, rmsd is 35.217175
sib.fastconf.EADock3: Minimizing binding mode 2916, energy is 1109.6583, rmsd is 42.05748
sib.fastconf.EADock3: Minimizing binding mode 2917, energy is 1112.1372, rmsd is 40.68347
sib.fastconf.EADock3: Minimizing binding mode 2918, energy is 1112.9249, rmsd is 35.691578
sib.fastconf.EADock3: Minimizing binding mode 2919, energy is 1114.1105, rmsd is 44.64363
sib.fastconf.EADock3: Minimizing binding mode 2920, energy is 1114.5745, rmsd is 30.302742
sib.fastconf.EADock3: Minimizing binding mode 2921, energy is 1114.7631, rmsd is 39.21977
sib.fastconf.EADock3: Minimizing binding mode 2922, energy is 1115.3434, rmsd is 36.10243
sib.fastconf.EADock3: Minimizing binding mode 2923, energy is 1116.1488, rmsd is 34.368908
sib.fastconf.EADock3: Minimizing binding mode 2924, energy is 1117.9421, rmsd is 48.686283
sib.fastconf.EADock3: Minimizing binding mode 2925, energy is 1118.2756, rmsd is 63.92337
sib.fastconf.EADock3: Minimizing binding mode 2926, energy is 1118.7781, rmsd is 13.064299
sib.fastconf.EADock3: Minimizing binding mode 2927, energy is 1119.3813, rmsd is 53.796787
sib.fastconf.EADock3: Minimizing binding mode 2928, energy is 1119.9912, rmsd is 38.280457
sib.fastconf.EADock3: Minimizing binding mode 2929, energy is 1120.3585, rmsd is 40.089436
sib.fastconf.EADock3: Minimizing binding mode 2930, energy is 1121.0172, rmsd is 29.382526
sib.fastconf.EADock3: Minimizing binding mode 2931, energy is 1121.1887, rmsd is 38.867924
sib.fastconf.EADock3: Minimizing binding mode 2932, energy is 1121.6968, rmsd is 36.01714
sib.fastconf.EADock3: Minimizing binding mode 2933, energy is 1121.8612, rmsd is 38.299877
sib.fastconf.EADock3: Minimizing binding mode 2934, energy is 1121.9333, rmsd is 13.043287
sib.fastconf.EADock3: Minimizing binding mode 2935, energy is 1123.2372, rmsd is 38.785637
sib.fastconf.EADock3: Minimizing binding mode 2936, energy is 1123.6989, rmsd is 45.679176
sib.fastconf.EADock3: Minimizing binding mode 2937, energy is 1123.9197, rmsd is 37.910744
sib.fastconf.EADock3: Minimizing binding mode 2938, energy is 1124.1255, rmsd is 12.931938
sib.fastconf.EADock3: Minimizing binding mode 2939, energy is 1124.1414, rmsd is 3.1962717
sib.fastconf.EADock3: Minimizing binding mode 2940, energy is 1124.498, rmsd is 40.722572
sib.fastconf.EADock3: Minimizing binding mode 2941, energy is 1125.3729, rmsd is 42.982105
sib.fastconf.EADock3: Minimizing binding mode 2942, energy is 1125.373, rmsd is 33.74899
sib.fastconf.EADock3: Minimizing binding mode 2943, energy is 1125.5917, rmsd is 63.976345
sib.fastconf.EADock3: Minimizing binding mode 2944, energy is 1128.8751, rmsd is 29.01637
sib.fastconf.EADock3: Minimizing binding mode 2945, energy is 1129.4226, rmsd is 31.30168
sib.fastconf.EADock3: Minimizing binding mode 2946, energy is 1130.8289, rmsd is 64.88493
sib.fastconf.EADock3: Minimizing binding mode 2947, energy is 1130.9922, rmsd is 42.932213
sib.fastconf.EADock3: Minimizing binding mode 2948, energy is 1132.2506, rmsd is 38.79761
sib.fastconf.EADock3: Minimizing binding mode 2949, energy is 1132.254, rmsd is 3.7141562
sib.fastconf.EADock3: Minimizing binding mode 2950, energy is 1132.6577, rmsd is 47.653538
sib.fastconf.EADock3: Minimizing binding mode 2951, energy is 1132.6742, rmsd is 43.913773
sib.fastconf.EADock3: Minimizing binding mode 2952, energy is 1132.8881, rmsd is 34.590324
sib.fastconf.EADock3: Minimizing binding mode 2953, energy is 1133.6265, rmsd is 1.5759417
sib.fastconf.EADock3: Minimizing binding mode 2954, energy is 1134.3748, rmsd is 40.216274
sib.fastconf.EADock3: Minimizing binding mode 2955, energy is 1134.6527, rmsd is 11.766384
sib.fastconf.EADock3: Minimizing binding mode 2956, energy is 1135.918, rmsd is 36.74249
sib.fastconf.EADock3: Minimizing binding mode 2957, energy is 1136.3638, rmsd is 1.8762934
sib.fastconf.EADock3: Minimizing binding mode 2958, energy is 1136.6168, rmsd is 68.14161
sib.fastconf.EADock3: Minimizing binding mode 2959, energy is 1137.7007, rmsd is 11.913876
sib.fastconf.EADock3: Minimizing binding mode 2960, energy is 1139.2076, rmsd is 63.85096
sib.fastconf.EADock3: Minimizing binding mode 2961, energy is 1139.4471, rmsd is 13.570013
sib.fastconf.EADock3: Minimizing binding mode 2962, energy is 1140.5054, rmsd is 55.112522
sib.fastconf.EADock3: Minimizing binding mode 2963, energy is 1140.6542, rmsd is 57.530624
sib.fastconf.EADock3: Minimizing binding mode 2964, energy is 1141.9395, rmsd is 53.172066
sib.fastconf.EADock3: Minimizing binding mode 2965, energy is 1142.2617, rmsd is 48.756172
sib.fastconf.EADock3: Minimizing binding mode 2966, energy is 1142.5618, rmsd is 29.936956
sib.fastconf.EADock3: Minimizing binding mode 2967, energy is 1143.6324, rmsd is 40.440315
sib.fastconf.EADock3: Minimizing binding mode 2968, energy is 1144.236, rmsd is 13.093659
sib.fastconf.EADock3: Minimizing binding mode 2969, energy is 1147.6993, rmsd is 33.47724
sib.fastconf.EADock3: Minimizing binding mode 2970, energy is 1148.8463, rmsd is 65.55663
sib.fastconf.EADock3: Minimizing binding mode 2971, energy is 1149.8198, rmsd is 2.0694554
sib.fastconf.EADock3: Minimizing binding mode 2972, energy is 1152.7157, rmsd is 12.36758
sib.fastconf.EADock3: Minimizing binding mode 2973, energy is 1152.9244, rmsd is 31.044785
sib.fastconf.EADock3: Minimizing binding mode 2974, energy is 1153.0542, rmsd is 46.180084
sib.fastconf.EADock3: Minimizing binding mode 2975, energy is 1153.1461, rmsd is 30.478598
sib.fastconf.EADock3: Minimizing binding mode 2976, energy is 1153.3346, rmsd is 12.608894
sib.fastconf.EADock3: Minimizing binding mode 2977, energy is 1153.4567, rmsd is 42.866108
sib.fastconf.EADock3: Minimizing binding mode 2978, energy is 1153.6688, rmsd is 40.64178
sib.fastconf.EADock3: Minimizing binding mode 2979, energy is 1154.715, rmsd is 27.93615
sib.fastconf.EADock3: Minimizing binding mode 2980, energy is 1154.8755, rmsd is 12.3432
sib.fastconf.EADock3: Minimizing binding mode 2981, energy is 1155.3916, rmsd is 55.46884
sib.fastconf.EADock3: Minimizing binding mode 2982, energy is 1155.8245, rmsd is 33.798717
sib.fastconf.EADock3: Minimizing binding mode 2983, energy is 1156.375, rmsd is 32.57251
sib.fastconf.EADock3: Minimizing binding mode 2984, energy is 1157.1726, rmsd is 35.531036
sib.fastconf.EADock3: Minimizing binding mode 2985, energy is 1157.4044, rmsd is 14.959989
sib.fastconf.EADock3: Minimizing binding mode 2986, energy is 1157.5554, rmsd is 29.795935
sib.fastconf.EADock3: Minimizing binding mode 2987, energy is 1159.0328, rmsd is 40.626125
sib.fastconf.EADock3: Minimizing binding mode 2988, energy is 1160.9174, rmsd is 1.716812
sib.fastconf.EADock3: Minimizing binding mode 2989, energy is 1160.9415, rmsd is 36.43446
sib.fastconf.EADock3: Minimizing binding mode 2990, energy is 1161.0101, rmsd is 43.29715
sib.fastconf.EADock3: Minimizing binding mode 2991, energy is 1162.669, rmsd is 43.022846
sib.fastconf.EADock3: Minimizing binding mode 2992, energy is 1163.7065, rmsd is 63.70646
sib.fastconf.EADock3: Minimizing binding mode 2993, energy is 1164.5798, rmsd is 43.687836
sib.fastconf.EADock3: Minimizing binding mode 2994, energy is 1167.0482, rmsd is 40.234154
sib.fastconf.EADock3: Minimizing binding mode 2995, energy is 1167.4232, rmsd is 10.853294
sib.fastconf.EADock3: Minimizing binding mode 2996, energy is 1168.2952, rmsd is 65.625374
sib.fastconf.EADock3: Minimizing binding mode 2997, energy is 1168.5448, rmsd is 54.968597
sib.fastconf.EADock3: Minimizing binding mode 2998, energy is 1168.6844, rmsd is 42.9721
sib.fastconf.EADock3: Minimizing binding mode 2999, energy is 1168.8558, rmsd is 40.263832
sib.fastconf.EADock3: Minimizing binding mode 3000, energy is 1169.0239, rmsd is 13.246256
sib.fastconf.EADock3: Minimizing binding mode 3001, energy is 1169.7947, rmsd is 3.4226105
sib.fastconf.EADock3: Minimizing binding mode 3002, energy is 1170.2155, rmsd is 45.155914
sib.fastconf.EADock3: Minimizing binding mode 3003, energy is 1170.418, rmsd is 32.838043
sib.fastconf.EADock3: Minimizing binding mode 3004, energy is 1171.5851, rmsd is 2.1297796
sib.fastconf.EADock3: Minimizing binding mode 3005, energy is 1171.6052, rmsd is 48.094025
sib.fastconf.EADock3: Minimizing binding mode 3006, energy is 1172.089, rmsd is 46.845303
sib.fastconf.EADock3: Minimizing binding mode 3007, energy is 1172.5281, rmsd is 13.423036
sib.fastconf.EADock3: Minimizing binding mode 3008, energy is 1172.6355, rmsd is 65.50859
sib.fastconf.EADock3: Minimizing binding mode 3009, energy is 1172.8861, rmsd is 37.06564
sib.fastconf.EADock3: Minimizing binding mode 3010, energy is 1173.2214, rmsd is 45.58987
sib.fastconf.EADock3: Minimizing binding mode 3011, energy is 1174.7843, rmsd is 39.1501
sib.fastconf.EADock3: Minimizing binding mode 3012, energy is 1175.3096, rmsd is 44.804424
sib.fastconf.EADock3: Minimizing binding mode 3013, energy is 1176.405, rmsd is 27.006998
sib.fastconf.EADock3: Minimizing binding mode 3014, energy is 1178.0269, rmsd is 30.764572
sib.fastconf.EADock3: Minimizing binding mode 3015, energy is 1178.1835, rmsd is 28.897934
sib.fastconf.EADock3: Minimizing binding mode 3016, energy is 1178.699, rmsd is 53.086617
sib.fastconf.EADock3: Minimizing binding mode 3017, energy is 1181.2307, rmsd is 41.48064
sib.fastconf.EADock3: Minimizing binding mode 3018, energy is 1183.944, rmsd is 32.462147
sib.fastconf.EADock3: Minimizing binding mode 3019, energy is 1184.6174, rmsd is 38.38411
sib.fastconf.EADock3: Minimizing binding mode 3020, energy is 1186.7042, rmsd is 30.538868
sib.fastconf.EADock3: Minimizing binding mode 3021, energy is 1187.0292, rmsd is 30.693409
sib.fastconf.EADock3: Minimizing binding mode 3022, energy is 1187.5646, rmsd is 32.102142
sib.fastconf.EADock3: Minimizing binding mode 3023, energy is 1190.8232, rmsd is 54.204784
sib.fastconf.EADock3: Minimizing binding mode 3024, energy is 1191.0433, rmsd is 35.300125
sib.fastconf.EADock3: Minimizing binding mode 3025, energy is 1191.5244, rmsd is 66.805084
sib.fastconf.EADock3: Minimizing binding mode 3026, energy is 1192.7195, rmsd is 31.17492
sib.fastconf.EADock3: Minimizing binding mode 3027, energy is 1193.2135, rmsd is 48.115093
sib.fastconf.EADock3: Minimizing binding mode 3028, energy is 1193.3083, rmsd is 31.168251
sib.fastconf.EADock3: Minimizing binding mode 3029, energy is 1193.505, rmsd is 44.124306
sib.fastconf.EADock3: Minimizing binding mode 3030, energy is 1194.5071, rmsd is 40.987366
sib.fastconf.EADock3: Minimizing binding mode 3031, energy is 1196.3715, rmsd is 15.225364
sib.fastconf.EADock3: Minimizing binding mode 3032, energy is 1196.7498, rmsd is 30.86491
sib.fastconf.EADock3: Minimizing binding mode 3033, energy is 1197.2023, rmsd is 42.159317
sib.fastconf.EADock3: Minimizing binding mode 3034, energy is 1198.3966, rmsd is 13.26998
sib.fastconf.EADock3: Minimizing binding mode 3035, energy is 1198.5045, rmsd is 34.167854
sib.fastconf.EADock3: Minimizing binding mode 3036, energy is 1199.0302, rmsd is 31.602945
sib.fastconf.EADock3: Minimizing binding mode 3037, energy is 1201.1821, rmsd is 41.857975
sib.fastconf.EADock3: Minimizing binding mode 3038, energy is 1201.2206, rmsd is 34.826923
sib.fastconf.EADock3: Minimizing binding mode 3039, energy is 1202.6799, rmsd is 12.049093
sib.fastconf.EADock3: Minimizing binding mode 3040, energy is 1203.0146, rmsd is 46.05589
sib.fastconf.EADock3: Minimizing binding mode 3041, energy is 1203.9761, rmsd is 56.6409
sib.fastconf.EADock3: Minimizing binding mode 3042, energy is 1204.932, rmsd is 63.051945
sib.fastconf.EADock3: Minimizing binding mode 3043, energy is 1206.4879, rmsd is 43.10845
sib.fastconf.EADock3: Minimizing binding mode 3044, energy is 1208.6326, rmsd is 43.0739
sib.fastconf.EADock3: Minimizing binding mode 3045, energy is 1208.7335, rmsd is 43.035774
sib.fastconf.EADock3: Minimizing binding mode 3046, energy is 1209.4314, rmsd is 52.523155
sib.fastconf.EADock3: Minimizing binding mode 3047, energy is 1209.9603, rmsd is 45.34596
sib.fastconf.EADock3: Minimizing binding mode 3048, energy is 1210.644, rmsd is 63.822247
sib.fastconf.EADock3: Minimizing binding mode 3049, energy is 1212.9286, rmsd is 40.09046
sib.fastconf.EADock3: Minimizing binding mode 3050, energy is 1215.0529, rmsd is 38.828484
sib.fastconf.EADock3: Minimizing binding mode 3051, energy is 1216.1787, rmsd is 42.136646
sib.fastconf.EADock3: Minimizing binding mode 3052, energy is 1217.1562, rmsd is 41.850517
sib.fastconf.EADock3: Minimizing binding mode 3053, energy is 1217.8364, rmsd is 38.33102
sib.fastconf.EADock3: Minimizing binding mode 3054, energy is 1219.6284, rmsd is 47.387386
sib.fastconf.EADock3: Minimizing binding mode 3055, energy is 1222.3635, rmsd is 66.92409
sib.fastconf.EADock3: Minimizing binding mode 3056, energy is 1223.2874, rmsd is 37.441372
sib.fastconf.EADock3: Minimizing binding mode 3057, energy is 1224.207, rmsd is 44.58068
sib.fastconf.EADock3: Minimizing binding mode 3058, energy is 1225.4624, rmsd is 45.706978
sib.fastconf.EADock3: Minimizing binding mode 3059, energy is 1226.298, rmsd is 11.270209
sib.fastconf.EADock3: Minimizing binding mode 3060, energy is 1226.4789, rmsd is 45.718475
sib.fastconf.EADock3: Minimizing binding mode 3061, energy is 1227.934, rmsd is 10.645707
sib.fastconf.EADock3: Minimizing binding mode 3062, energy is 1229.5135, rmsd is 56.398853
sib.fastconf.EADock3: Minimizing binding mode 3063, energy is 1230.5575, rmsd is 37.680458
sib.fastconf.EADock3: Minimizing binding mode 3064, energy is 1231.2725, rmsd is 46.35052
sib.fastconf.EADock3: Minimizing binding mode 3065, energy is 1231.8043, rmsd is 40.57319
sib.fastconf.EADock3: Minimizing binding mode 3066, energy is 1233.4144, rmsd is 65.34888
sib.fastconf.EADock3: Minimizing binding mode 3067, energy is 1235.3699, rmsd is 37.02116
sib.fastconf.EADock3: Minimizing binding mode 3068, energy is 1237.0973, rmsd is 47.28278
sib.fastconf.EADock3: Minimizing binding mode 3069, energy is 1241.1743, rmsd is 33.48023
sib.fastconf.EADock3: Minimizing binding mode 3070, energy is 1242.3379, rmsd is 40.051697
sib.fastconf.EADock3: Minimizing binding mode 3071, energy is 1242.987, rmsd is 20.896126
sib.fastconf.EADock3: Minimizing binding mode 3072, energy is 1245.265, rmsd is 36.526577
sib.fastconf.EADock3: Minimizing binding mode 3073, energy is 1245.3741, rmsd is 2.9860508
sib.fastconf.EADock3: Minimizing binding mode 3074, energy is 1246.1763, rmsd is 28.78057
sib.fastconf.EADock3: Minimizing binding mode 3075, energy is 1246.629, rmsd is 33.560608
sib.fastconf.EADock3: Minimizing binding mode 3076, energy is 1247.7106, rmsd is 30.740875
sib.fastconf.EADock3: Minimizing binding mode 3077, energy is 1250.2316, rmsd is 38.037865
sib.fastconf.EADock3: Minimizing binding mode 3078, energy is 1250.3389, rmsd is 45.405
sib.fastconf.EADock3: Minimizing binding mode 3079, energy is 1251.0544, rmsd is 3.564254
sib.fastconf.EADock3: Minimizing binding mode 3080, energy is 1251.22, rmsd is 40.41372
sib.fastconf.EADock3: Minimizing binding mode 3081, energy is 1251.5586, rmsd is 36.189106
sib.fastconf.EADock3: Minimizing binding mode 3082, energy is 1251.9015, rmsd is 30.875149
sib.fastconf.EADock3: Minimizing binding mode 3083, energy is 1252.5762, rmsd is 44.111465
sib.fastconf.EADock3: Minimizing binding mode 3084, energy is 1256.8472, rmsd is 33.11573
sib.fastconf.EADock3: Minimizing binding mode 3085, energy is 1260.0858, rmsd is 3.8204105
sib.fastconf.EADock3: Minimizing binding mode 3086, energy is 1260.1343, rmsd is 34.176353
sib.fastconf.EADock3: Minimizing binding mode 3087, energy is 1260.6385, rmsd is 50.480713
sib.fastconf.EADock3: Minimizing binding mode 3088, energy is 1260.7723, rmsd is 51.570637
sib.fastconf.EADock3: Minimizing binding mode 3089, energy is 1261.0393, rmsd is 13.020316
sib.fastconf.EADock3: Minimizing binding mode 3090, energy is 1261.685, rmsd is 38.311085
sib.fastconf.EADock3: Minimizing binding mode 3091, energy is 1261.7848, rmsd is 44.761246
sib.fastconf.EADock3: Minimizing binding mode 3092, energy is 1261.8508, rmsd is 28.78581
sib.fastconf.EADock3: Minimizing binding mode 3093, energy is 1262.0522, rmsd is 33.271084
sib.fastconf.EADock3: Minimizing binding mode 3094, energy is 1262.9832, rmsd is 67.77282
sib.fastconf.EADock3: Minimizing binding mode 3095, energy is 1263.1858, rmsd is 43.341805
sib.fastconf.EADock3: Minimizing binding mode 3096, energy is 1267.8479, rmsd is 11.990678
sib.fastconf.EADock3: Minimizing binding mode 3097, energy is 1267.9606, rmsd is 40.049633
sib.fastconf.EADock3: Minimizing binding mode 3098, energy is 1273.6575, rmsd is 12.911123
sib.fastconf.EADock3: Minimizing binding mode 3099, energy is 1273.7432, rmsd is 38.25026
sib.fastconf.EADock3: Minimizing binding mode 3100, energy is 1274.8234, rmsd is 54.06476
sib.fastconf.EADock3: Minimizing binding mode 3101, energy is 1275.6201, rmsd is 47.543686
sib.fastconf.EADock3: Minimizing binding mode 3102, energy is 1279.4187, rmsd is 13.215346
sib.fastconf.EADock3: Minimizing binding mode 3103, energy is 1279.4382, rmsd is 32.22798
sib.fastconf.EADock3: Minimizing binding mode 3104, energy is 1282.506, rmsd is 54.696716
sib.fastconf.EADock3: Minimizing binding mode 3105, energy is 1282.7303, rmsd is 44.31135
sib.fastconf.EADock3: Minimizing binding mode 3106, energy is 1287.9127, rmsd is 33.61262
sib.fastconf.EADock3: Minimizing binding mode 3107, energy is 1288.0267, rmsd is 47.662334
sib.fastconf.EADock3: Minimizing binding mode 3108, energy is 1289.1133, rmsd is 2.551346
sib.fastconf.EADock3: Minimizing binding mode 3109, energy is 1289.9523, rmsd is 28.596155
sib.fastconf.EADock3: Minimizing binding mode 3110, energy is 1291.6233, rmsd is 51.283062
sib.fastconf.EADock3: Minimizing binding mode 3111, energy is 1291.8081, rmsd is 33.056046
sib.fastconf.EADock3: Minimizing binding mode 3112, energy is 1291.9641, rmsd is 47.088303
sib.fastconf.EADock3: Minimizing binding mode 3113, energy is 1295.2019, rmsd is 63.322105
sib.fastconf.EADock3: Minimizing binding mode 3114, energy is 1295.427, rmsd is 2.163394
sib.fastconf.EADock3: Minimizing binding mode 3115, energy is 1295.7983, rmsd is 40.244797
sib.fastconf.EADock3: Minimizing binding mode 3116, energy is 1296.2268, rmsd is 33.38104
sib.fastconf.EADock3: Minimizing binding mode 3117, energy is 1299.11, rmsd is 63.20403
sib.fastconf.EADock3: Minimizing binding mode 3118, energy is 1299.4021, rmsd is 53.833107
sib.fastconf.EADock3: Minimizing binding mode 3119, energy is 1300.3711, rmsd is 13.188868
sib.fastconf.EADock3: Minimizing binding mode 3120, energy is 1301.2688, rmsd is 46.32502
sib.fastconf.EADock3: Minimizing binding mode 3121, energy is 1301.4746, rmsd is 46.006786
sib.fastconf.EADock3: Minimizing binding mode 3122, energy is 1301.8099, rmsd is 31.26631
sib.fastconf.EADock3: Minimizing binding mode 3123, energy is 1305.1312, rmsd is 46.604424
sib.fastconf.EADock3: Minimizing binding mode 3124, energy is 1306.7152, rmsd is 39.936348
sib.fastconf.EADock3: Minimizing binding mode 3125, energy is 1306.7266, rmsd is 32.636066
sib.fastconf.EADock3: Minimizing binding mode 3126, energy is 1307.0709, rmsd is 43.041637
sib.fastconf.EADock3: Minimizing binding mode 3127, energy is 1307.2483, rmsd is 12.794338
sib.fastconf.EADock3: Minimizing binding mode 3128, energy is 1308.0135, rmsd is 12.430445
sib.fastconf.EADock3: Minimizing binding mode 3129, energy is 1309.1707, rmsd is 37.15962
sib.fastconf.EADock3: Minimizing binding mode 3130, energy is 1309.8647, rmsd is 63.491196
sib.fastconf.EADock3: Minimizing binding mode 3131, energy is 1310.3088, rmsd is 41.81541
sib.fastconf.EADock3: Minimizing binding mode 3132, energy is 1310.317, rmsd is 36.900513
sib.fastconf.EADock3: Minimizing binding mode 3133, energy is 1310.6119, rmsd is 44.955
sib.fastconf.EADock3: Minimizing binding mode 3134, energy is 1313.9238, rmsd is 12.09328
sib.fastconf.EADock3: Minimizing binding mode 3135, energy is 1315.9431, rmsd is 13.8165455
sib.fastconf.EADock3: Minimizing binding mode 3136, energy is 1318.8116, rmsd is 14.444898
sib.fastconf.EADock3: Minimizing binding mode 3137, energy is 1323.2461, rmsd is 47.474693
sib.fastconf.EADock3: Minimizing binding mode 3138, energy is 1327.9424, rmsd is 3.422721
sib.fastconf.EADock3: Minimizing binding mode 3139, energy is 1328.1923, rmsd is 40.042553
sib.fastconf.EADock3: Minimizing binding mode 3140, energy is 1329.676, rmsd is 33.297554
sib.fastconf.EADock3: Minimizing binding mode 3141, energy is 1329.9807, rmsd is 66.358574
sib.fastconf.EADock3: Minimizing binding mode 3142, energy is 1330.4125, rmsd is 13.450145
sib.fastconf.EADock3: Minimizing binding mode 3143, energy is 1330.9576, rmsd is 15.495028
sib.fastconf.EADock3: Minimizing binding mode 3144, energy is 1330.958, rmsd is 45.669262
sib.fastconf.EADock3: Minimizing binding mode 3145, energy is 1334.0579, rmsd is 12.493679
sib.fastconf.EADock3: Minimizing binding mode 3146, energy is 1335.2179, rmsd is 40.32834
sib.fastconf.EADock3: Minimizing binding mode 3147, energy is 1336.4446, rmsd is 41.722385
sib.fastconf.EADock3: Minimizing binding mode 3148, energy is 1337.3812, rmsd is 46.65935
sib.fastconf.EADock3: Minimizing binding mode 3149, energy is 1337.9269, rmsd is 11.361953
sib.fastconf.EADock3: Minimizing binding mode 3150, energy is 1338.8628, rmsd is 38.43344
sib.fastconf.EADock3: Minimizing binding mode 3151, energy is 1339.5765, rmsd is 48.227535
sib.fastconf.EADock3: Minimizing binding mode 3152, energy is 1339.6115, rmsd is 45.029236
sib.fastconf.EADock3: Minimizing binding mode 3153, energy is 1341.4271, rmsd is 35.53351
sib.fastconf.EADock3: Minimizing binding mode 3154, energy is 1341.737, rmsd is 12.580674
sib.fastconf.EADock3: Minimizing binding mode 3155, energy is 1342.7125, rmsd is 29.92707
sib.fastconf.EADock3: Minimizing binding mode 3156, energy is 1342.7937, rmsd is 63.484688
sib.fastconf.EADock3: Minimizing binding mode 3157, energy is 1344.6, rmsd is 13.899123
sib.fastconf.EADock3: Minimizing binding mode 3158, energy is 1348.3193, rmsd is 66.95366
sib.fastconf.EADock3: Minimizing binding mode 3159, energy is 1349.1138, rmsd is 14.047864
sib.fastconf.EADock3: Minimizing binding mode 3160, energy is 1351.0316, rmsd is 40.576275
sib.fastconf.EADock3: Minimizing binding mode 3161, energy is 1352.272, rmsd is 64.2555
sib.fastconf.EADock3: Minimizing binding mode 3162, energy is 1353.5039, rmsd is 46.985928
sib.fastconf.EADock3: Minimizing binding mode 3163, energy is 1355.9888, rmsd is 53.62379
sib.fastconf.EADock3: Minimizing binding mode 3164, energy is 1359.6112, rmsd is 65.33414
sib.fastconf.EADock3: Minimizing binding mode 3165, energy is 1361.2231, rmsd is 42.94328
sib.fastconf.EADock3: Minimizing binding mode 3166, energy is 1361.5248, rmsd is 13.770558
sib.fastconf.EADock3: Minimizing binding mode 3167, energy is 1365.1688, rmsd is 12.942493
sib.fastconf.EADock3: Minimizing binding mode 3168, energy is 1369.2205, rmsd is 41.874676
sib.fastconf.EADock3: Minimizing binding mode 3169, energy is 1369.5809, rmsd is 41.306583
sib.fastconf.EADock3: Minimizing binding mode 3170, energy is 1369.7037, rmsd is 30.636953
sib.fastconf.EADock3: Minimizing binding mode 3171, energy is 1370.4502, rmsd is 45.29148
sib.fastconf.EADock3: Minimizing binding mode 3172, energy is 1371.251, rmsd is 37.33709
sib.fastconf.EADock3: Minimizing binding mode 3173, energy is 1372.1161, rmsd is 30.283169
sib.fastconf.EADock3: Minimizing binding mode 3174, energy is 1373.6842, rmsd is 37.759842
sib.fastconf.EADock3: Minimizing binding mode 3175, energy is 1375.9188, rmsd is 53.24389
sib.fastconf.EADock3: Minimizing binding mode 3176, energy is 1376.0126, rmsd is 40.75164
sib.fastconf.EADock3: Minimizing binding mode 3177, energy is 1376.1383, rmsd is 44.656193
sib.fastconf.EADock3: Minimizing binding mode 3178, energy is 1376.4574, rmsd is 2.7196908
sib.fastconf.EADock3: Minimizing binding mode 3179, energy is 1379.2046, rmsd is 31.077084
sib.fastconf.EADock3: Minimizing binding mode 3180, energy is 1379.3182, rmsd is 40.554386
sib.fastconf.EADock3: Minimizing binding mode 3181, energy is 1379.9335, rmsd is 50.12951
sib.fastconf.EADock3: Minimizing binding mode 3182, energy is 1380.3944, rmsd is 15.693243
sib.fastconf.EADock3: Minimizing binding mode 3183, energy is 1380.777, rmsd is 41.681858
sib.fastconf.EADock3: Minimizing binding mode 3184, energy is 1380.9349, rmsd is 63.95775
sib.fastconf.EADock3: Minimizing binding mode 3185, energy is 1381.4542, rmsd is 41.76763
sib.fastconf.EADock3: Minimizing binding mode 3186, energy is 1382.1465, rmsd is 2.557671
sib.fastconf.EADock3: Minimizing binding mode 3187, energy is 1383.2412, rmsd is 29.996645
sib.fastconf.EADock3: Minimizing binding mode 3188, energy is 1386.516, rmsd is 50.595055
sib.fastconf.EADock3: Minimizing binding mode 3189, energy is 1386.783, rmsd is 32.43586
sib.fastconf.EADock3: Minimizing binding mode 3190, energy is 1387.1039, rmsd is 49.186035
sib.fastconf.EADock3: Minimizing binding mode 3191, energy is 1389.0507, rmsd is 18.216936
sib.fastconf.EADock3: Minimizing binding mode 3192, energy is 1389.4956, rmsd is 12.737494
sib.fastconf.EADock3: Minimizing binding mode 3193, energy is 1389.7007, rmsd is 14.837251
sib.fastconf.EADock3: Minimizing binding mode 3194, energy is 1390.1289, rmsd is 36.315063
sib.fastconf.EADock3: Minimizing binding mode 3195, energy is 1392.3436, rmsd is 63.52197
sib.fastconf.EADock3: Minimizing binding mode 3196, energy is 1394.1184, rmsd is 46.13196
sib.fastconf.EADock3: Minimizing binding mode 3197, energy is 1394.6381, rmsd is 12.495217
sib.fastconf.EADock3: Minimizing binding mode 3198, energy is 1395.4165, rmsd is 47.463444
sib.fastconf.EADock3: Minimizing binding mode 3199, energy is 1395.5767, rmsd is 3.0200942
sib.fastconf.EADock3: Minimizing binding mode 3200, energy is 1396.9302, rmsd is 30.85872
sib.fastconf.EADock3: Minimizing binding mode 3201, energy is 1397.3641, rmsd is 40.97942
sib.fastconf.EADock3: Minimizing binding mode 3202, energy is 1398.3121, rmsd is 30.116516
sib.fastconf.EADock3: Minimizing binding mode 3203, energy is 1401.4248, rmsd is 3.1743479
sib.fastconf.EADock3: Minimizing binding mode 3204, energy is 1401.7498, rmsd is 35.015068
sib.fastconf.EADock3: Minimizing binding mode 3205, energy is 1403.0, rmsd is 3.5726008
sib.fastconf.EADock3: Minimizing binding mode 3206, energy is 1404.0822, rmsd is 11.249565
sib.fastconf.EADock3: Minimizing binding mode 3207, energy is 1407.4458, rmsd is 49.114857
sib.fastconf.EADock3: Minimizing binding mode 3208, energy is 1407.6257, rmsd is 37.34262
sib.fastconf.EADock3: Minimizing binding mode 3209, energy is 1407.9059, rmsd is 31.967695
sib.fastconf.EADock3: Minimizing binding mode 3210, energy is 1408.6416, rmsd is 40.111217
sib.fastconf.EADock3: Minimizing binding mode 3211, energy is 1408.7856, rmsd is 2.8376231
sib.fastconf.EADock3: Minimizing binding mode 3212, energy is 1409.0295, rmsd is 14.314262
sib.fastconf.EADock3: Minimizing binding mode 3213, energy is 1411.4103, rmsd is 38.436455
sib.fastconf.EADock3: Minimizing binding mode 3214, energy is 1412.0437, rmsd is 64.61739
sib.fastconf.EADock3: Minimizing binding mode 3215, energy is 1412.3536, rmsd is 41.9033
sib.fastconf.EADock3: Minimizing binding mode 3216, energy is 1414.0394, rmsd is 40.3617
sib.fastconf.EADock3: Minimizing binding mode 3217, energy is 1417.2982, rmsd is 51.97261
sib.fastconf.EADock3: Minimizing binding mode 3218, energy is 1418.7981, rmsd is 36.860523
sib.fastconf.EADock3: Minimizing binding mode 3219, energy is 1419.8002, rmsd is 47.691986
sib.fastconf.EADock3: Minimizing binding mode 3220, energy is 1419.8258, rmsd is 28.722569
sib.fastconf.EADock3: Minimizing binding mode 3221, energy is 1421.5605, rmsd is 46.29264
sib.fastconf.EADock3: Minimizing binding mode 3222, energy is 1421.9126, rmsd is 48.3052
sib.fastconf.EADock3: Minimizing binding mode 3223, energy is 1422.7239, rmsd is 32.462986
sib.fastconf.EADock3: Minimizing binding mode 3224, energy is 1427.3663, rmsd is 32.80583
sib.fastconf.EADock3: Minimizing binding mode 3225, energy is 1427.4923, rmsd is 43.71705
sib.fastconf.EADock3: Minimizing binding mode 3226, energy is 1428.3527, rmsd is 44.916935
sib.fastconf.EADock3: Minimizing binding mode 3227, energy is 1429.094, rmsd is 53.030594
sib.fastconf.EADock3: Minimizing binding mode 3228, energy is 1429.5693, rmsd is 45.6669
sib.fastconf.EADock3: Minimizing binding mode 3229, energy is 1429.7119, rmsd is 41.132576
sib.fastconf.EADock3: Minimizing binding mode 3230, energy is 1430.1381, rmsd is 49.60286
sib.fastconf.EADock3: Minimizing binding mode 3231, energy is 1430.6646, rmsd is 33.30053
sib.fastconf.EADock3: Minimizing binding mode 3232, energy is 1431.619, rmsd is 34.923946
sib.fastconf.EADock3: Minimizing binding mode 3233, energy is 1432.5496, rmsd is 46.237595
sib.fastconf.EADock3: Minimizing binding mode 3234, energy is 1435.1127, rmsd is 37.85696
sib.fastconf.EADock3: Minimizing binding mode 3235, energy is 1435.7023, rmsd is 28.126972
sib.fastconf.EADock3: Minimizing binding mode 3236, energy is 1436.6968, rmsd is 45.826523
sib.fastconf.EADock3: Minimizing binding mode 3237, energy is 1436.9048, rmsd is 14.430957
sib.fastconf.EADock3: Minimizing binding mode 3238, energy is 1439.3392, rmsd is 30.08158
sib.fastconf.EADock3: Minimizing binding mode 3239, energy is 1440.3666, rmsd is 35.624836
sib.fastconf.EADock3: Minimizing binding mode 3240, energy is 1441.2379, rmsd is 30.95749
sib.fastconf.EADock3: Minimizing binding mode 3241, energy is 1444.695, rmsd is 29.726622
sib.fastconf.EADock3: Minimizing binding mode 3242, energy is 1448.244, rmsd is 33.3426
sib.fastconf.EADock3: Minimizing binding mode 3243, energy is 1450.5994, rmsd is 2.652674
sib.fastconf.EADock3: Minimizing binding mode 3244, energy is 1450.9612, rmsd is 13.489606
sib.fastconf.EADock3: Minimizing binding mode 3245, energy is 1454.2661, rmsd is 30.741068
sib.fastconf.EADock3: Minimizing binding mode 3246, energy is 1459.8185, rmsd is 50.768776
sib.fastconf.EADock3: Minimizing binding mode 3247, energy is 1460.3615, rmsd is 33.149475
sib.fastconf.EADock3: Minimizing binding mode 3248, energy is 1460.4954, rmsd is 51.929554
sib.fastconf.EADock3: Minimizing binding mode 3249, energy is 1461.1781, rmsd is 45.83238
sib.fastconf.EADock3: Minimizing binding mode 3250, energy is 1461.4784, rmsd is 40.624046
sib.fastconf.EADock3: Minimizing binding mode 3251, energy is 1461.5396, rmsd is 38.12096
sib.fastconf.EADock3: Minimizing binding mode 3252, energy is 1461.9419, rmsd is 15.156536
sib.fastconf.EADock3: Minimizing binding mode 3253, energy is 1462.9612, rmsd is 46.209927
sib.fastconf.EADock3: Minimizing binding mode 3254, energy is 1463.0015, rmsd is 53.97852
sib.fastconf.EADock3: Minimizing binding mode 3255, energy is 1463.3796, rmsd is 45.48148
sib.fastconf.EADock3: Minimizing binding mode 3256, energy is 1463.5759, rmsd is 45.65065
sib.fastconf.EADock3: Minimizing binding mode 3257, energy is 1465.432, rmsd is 13.429283
sib.fastconf.EADock3: Minimizing binding mode 3258, energy is 1471.6659, rmsd is 35.0
sib.fastconf.EADock3: Minimizing binding mode 3259, energy is 1473.1138, rmsd is 13.134542
sib.fastconf.EADock3: Minimizing binding mode 3260, energy is 1474.2384, rmsd is 15.071181
sib.fastconf.EADock3: Minimizing binding mode 3261, energy is 1475.6382, rmsd is 44.8406
sib.fastconf.EADock3: Minimizing binding mode 3262, energy is 1481.2229, rmsd is 32.731174
sib.fastconf.EADock3: Minimizing binding mode 3263, energy is 1482.0267, rmsd is 47.02795
sib.fastconf.EADock3: Minimizing binding mode 3264, energy is 1482.8926, rmsd is 29.37703
sib.fastconf.EADock3: Minimizing binding mode 3265, energy is 1483.2925, rmsd is 31.723888
sib.fastconf.EADock3: Minimizing binding mode 3266, energy is 1483.5662, rmsd is 44.55957
sib.fastconf.EADock3: Minimizing binding mode 3267, energy is 1483.8616, rmsd is 40.079494
sib.fastconf.EADock3: Minimizing binding mode 3268, energy is 1485.3256, rmsd is 47.047276
sib.fastconf.EADock3: Minimizing binding mode 3269, energy is 1485.7098, rmsd is 15.582823
sib.fastconf.EADock3: Minimizing binding mode 3270, energy is 1486.6012, rmsd is 48.200783
sib.fastconf.EADock3: Minimizing binding mode 3271, energy is 1488.6182, rmsd is 40.98229
sib.fastconf.EADock3: Minimizing binding mode 3272, energy is 1488.8966, rmsd is 43.813652
sib.fastconf.EADock3: Minimizing binding mode 3273, energy is 1489.6571, rmsd is 9.685797
sib.fastconf.EADock3: Minimizing binding mode 3274, energy is 1490.9409, rmsd is 47.1818
sib.fastconf.EADock3: Minimizing binding mode 3275, energy is 1493.117, rmsd is 55.894524
sib.fastconf.EADock3: Minimizing binding mode 3276, energy is 1493.4338, rmsd is 29.983912
sib.fastconf.EADock3: Minimizing binding mode 3277, energy is 1496.1774, rmsd is 42.038536
sib.fastconf.EADock3: Minimizing binding mode 3278, energy is 1496.229, rmsd is 43.53437
sib.fastconf.EADock3: Minimizing binding mode 3279, energy is 1497.6682, rmsd is 54.191998
sib.fastconf.EADock3: Minimizing binding mode 3280, energy is 1498.4524, rmsd is 28.539091
sib.fastconf.EADock3: Minimizing binding mode 3281, energy is 1500.3125, rmsd is 29.285034
sib.fastconf.EADock3: Minimizing binding mode 3282, energy is 1503.3307, rmsd is 43.387753
sib.fastconf.EADock3: Minimizing binding mode 3283, energy is 1503.3527, rmsd is 14.929614
sib.fastconf.EADock3: Minimizing binding mode 3284, energy is 1504.826, rmsd is 33.907017
sib.fastconf.EADock3: Minimizing binding mode 3285, energy is 1505.7667, rmsd is 29.54106
sib.fastconf.EADock3: Minimizing binding mode 3286, energy is 1506.6082, rmsd is 46.968143
sib.fastconf.EADock3: Minimizing binding mode 3287, energy is 1509.8364, rmsd is 31.765837
sib.fastconf.EADock3: Minimizing binding mode 3288, energy is 1511.3961, rmsd is 30.76216
sib.fastconf.EADock3: Minimizing binding mode 3289, energy is 1512.0935, rmsd is 13.427931
sib.fastconf.EADock3: Minimizing binding mode 3290, energy is 1513.5884, rmsd is 40.817497
sib.fastconf.EADock3: Minimizing binding mode 3291, energy is 1513.6592, rmsd is 63.665573
sib.fastconf.EADock3: Minimizing binding mode 3292, energy is 1515.6836, rmsd is 63.930653
sib.fastconf.EADock3: Minimizing binding mode 3293, energy is 1518.9845, rmsd is 41.565662
sib.fastconf.EADock3: Minimizing binding mode 3294, energy is 1520.8384, rmsd is 40.88116
sib.fastconf.EADock3: Minimizing binding mode 3295, energy is 1521.2532, rmsd is 39.448578
sib.fastconf.EADock3: Minimizing binding mode 3296, energy is 1521.3854, rmsd is 38.957035
sib.fastconf.EADock3: Minimizing binding mode 3297, energy is 1522.9891, rmsd is 34.772694
sib.fastconf.EADock3: Minimizing binding mode 3298, energy is 1524.0293, rmsd is 47.168457
sib.fastconf.EADock3: Minimizing binding mode 3299, energy is 1524.2703, rmsd is 38.523468
sib.fastconf.EADock3: Minimizing binding mode 3300, energy is 1525.4961, rmsd is 30.329748
sib.fastconf.EADock3: Minimizing binding mode 3301, energy is 1525.8871, rmsd is 2.4507985
sib.fastconf.EADock3: Minimizing binding mode 3302, energy is 1527.5691, rmsd is 41.428814
sib.fastconf.EADock3: Minimizing binding mode 3303, energy is 1528.4508, rmsd is 47.933353
sib.fastconf.EADock3: Minimizing binding mode 3304, energy is 1529.411, rmsd is 34.39386
sib.fastconf.EADock3: Minimizing binding mode 3305, energy is 1530.7954, rmsd is 12.672007
sib.fastconf.EADock3: Minimizing binding mode 3306, energy is 1536.0155, rmsd is 14.509879
sib.fastconf.EADock3: Minimizing binding mode 3307, energy is 1538.3927, rmsd is 54.329834
sib.fastconf.EADock3: Minimizing binding mode 3308, energy is 1539.1357, rmsd is 37.336983
sib.fastconf.EADock3: Minimizing binding mode 3309, energy is 1540.7267, rmsd is 13.401834
sib.fastconf.EADock3: Minimizing binding mode 3310, energy is 1542.334, rmsd is 59.037857
sib.fastconf.EADock3: Minimizing binding mode 3311, energy is 1542.6221, rmsd is 63.72187
sib.fastconf.EADock3: Minimizing binding mode 3312, energy is 1545.2756, rmsd is 43.70042
sib.fastconf.EADock3: Minimizing binding mode 3313, energy is 1546.4705, rmsd is 31.427612
sib.fastconf.EADock3: Minimizing binding mode 3314, energy is 1547.5094, rmsd is 14.218966
sib.fastconf.EADock3: Minimizing binding mode 3315, energy is 1548.064, rmsd is 30.479937
sib.fastconf.EADock3: Minimizing binding mode 3316, energy is 1549.5393, rmsd is 13.327911
sib.fastconf.EADock3: Minimizing binding mode 3317, energy is 1550.6113, rmsd is 34.27916
sib.fastconf.EADock3: Minimizing binding mode 3318, energy is 1554.2032, rmsd is 63.34164
sib.fastconf.EADock3: Minimizing binding mode 3319, energy is 1557.3019, rmsd is 14.242656
sib.fastconf.EADock3: Minimizing binding mode 3320, energy is 1558.5037, rmsd is 40.01668
sib.fastconf.EADock3: Minimizing binding mode 3321, energy is 1559.6768, rmsd is 46.91741
sib.fastconf.EADock3: Minimizing binding mode 3322, energy is 1563.4905, rmsd is 36.320713
sib.fastconf.EADock3: Minimizing binding mode 3323, energy is 1564.1041, rmsd is 48.77071
sib.fastconf.EADock3: Minimizing binding mode 3324, energy is 1565.4229, rmsd is 48.57799
sib.fastconf.EADock3: Minimizing binding mode 3325, energy is 1566.0264, rmsd is 53.92705
sib.fastconf.EADock3: Minimizing binding mode 3326, energy is 1566.4232, rmsd is 47.24783
sib.fastconf.EADock3: Minimizing binding mode 3327, energy is 1568.1113, rmsd is 46.646984
sib.fastconf.EADock3: Minimizing binding mode 3328, energy is 1569.886, rmsd is 47.947388
sib.fastconf.EADock3: Minimizing binding mode 3329, energy is 1570.2137, rmsd is 63.647423
sib.fastconf.EADock3: Minimizing binding mode 3330, energy is 1572.1324, rmsd is 42.238594
sib.fastconf.EADock3: Minimizing binding mode 3331, energy is 1574.3544, rmsd is 11.264984
sib.fastconf.EADock3: Minimizing binding mode 3332, energy is 1574.6155, rmsd is 43.63511
sib.fastconf.EADock3: Minimizing binding mode 3333, energy is 1574.6322, rmsd is 32.266407
sib.fastconf.EADock3: Minimizing binding mode 3334, energy is 1575.8716, rmsd is 30.460556
sib.fastconf.EADock3: Minimizing binding mode 3335, energy is 1577.5302, rmsd is 31.43479
sib.fastconf.EADock3: Minimizing binding mode 3336, energy is 1586.4706, rmsd is 40.692284
sib.fastconf.EADock3: Minimizing binding mode 3337, energy is 1591.0276, rmsd is 45.295082
sib.fastconf.EADock3: Minimizing binding mode 3338, energy is 1591.5752, rmsd is 33.349064
sib.fastconf.EADock3: Minimizing binding mode 3339, energy is 1595.2207, rmsd is 13.096521
sib.fastconf.EADock3: Minimizing binding mode 3340, energy is 1596.3867, rmsd is 13.117524
sib.fastconf.EADock3: Minimizing binding mode 3341, energy is 1597.4235, rmsd is 46.862873
sib.fastconf.EADock3: Minimizing binding mode 3342, energy is 1597.9495, rmsd is 43.14724
sib.fastconf.EADock3: Minimizing binding mode 3343, energy is 1599.511, rmsd is 32.748302
sib.fastconf.EADock3: Minimizing binding mode 3344, energy is 1600.6168, rmsd is 14.765872
sib.fastconf.EADock3: Minimizing binding mode 3345, energy is 1601.4054, rmsd is 46.36772
sib.fastconf.EADock3: Minimizing binding mode 3346, energy is 1602.7832, rmsd is 49.026817
sib.fastconf.EADock3: Minimizing binding mode 3347, energy is 1604.9279, rmsd is 53.958286
sib.fastconf.EADock3: Minimizing binding mode 3348, energy is 1605.9178, rmsd is 30.443499
sib.fastconf.EADock3: Minimizing binding mode 3349, energy is 1606.1427, rmsd is 46.177246
sib.fastconf.EADock3: Minimizing binding mode 3350, energy is 1609.833, rmsd is 31.66562
sib.fastconf.EADock3: Minimizing binding mode 3351, energy is 1610.0085, rmsd is 39.499496
sib.fastconf.EADock3: Minimizing binding mode 3352, energy is 1611.2769, rmsd is 53.367325
sib.fastconf.EADock3: Minimizing binding mode 3353, energy is 1611.6473, rmsd is 31.392382
sib.fastconf.EADock3: Minimizing binding mode 3354, energy is 1614.124, rmsd is 48.324436
sib.fastconf.EADock3: Minimizing binding mode 3355, energy is 1614.6078, rmsd is 34.942142
sib.fastconf.EADock3: Minimizing binding mode 3356, energy is 1614.6282, rmsd is 32.366714
sib.fastconf.EADock3: Minimizing binding mode 3357, energy is 1614.7385, rmsd is 14.15179
sib.fastconf.EADock3: Minimizing binding mode 3358, energy is 1621.9592, rmsd is 57.384834
sib.fastconf.EADock3: Minimizing binding mode 3359, energy is 1624.0881, rmsd is 15.677452
sib.fastconf.EADock3: Minimizing binding mode 3360, energy is 1624.18, rmsd is 31.887924
sib.fastconf.EADock3: Minimizing binding mode 3361, energy is 1625.3024, rmsd is 33.453503
sib.fastconf.EADock3: Minimizing binding mode 3362, energy is 1626.2615, rmsd is 42.316357
sib.fastconf.EADock3: Minimizing binding mode 3363, energy is 1628.4924, rmsd is 11.405245
sib.fastconf.EADock3: Minimizing binding mode 3364, energy is 1629.4424, rmsd is 45.576572
sib.fastconf.EADock3: Minimizing binding mode 3365, energy is 1631.8917, rmsd is 48.680748
sib.fastconf.EADock3: Minimizing binding mode 3366, energy is 1633.9924, rmsd is 47.02044
sib.fastconf.EADock3: Minimizing binding mode 3367, energy is 1634.9978, rmsd is 39.753708
sib.fastconf.EADock3: Minimizing binding mode 3368, energy is 1635.6322, rmsd is 33.22332
sib.fastconf.EADock3: Minimizing binding mode 3369, energy is 1640.1641, rmsd is 47.503532
sib.fastconf.EADock3: Minimizing binding mode 3370, energy is 1640.3353, rmsd is 33.38977
sib.fastconf.EADock3: Minimizing binding mode 3371, energy is 1642.4471, rmsd is 35.472237
sib.fastconf.EADock3: Minimizing binding mode 3372, energy is 1642.6304, rmsd is 48.235504
sib.fastconf.EADock3: Minimizing binding mode 3373, energy is 1643.9175, rmsd is 3.4827836
sib.fastconf.EADock3: Minimizing binding mode 3374, energy is 1644.4751, rmsd is 47.576866
sib.fastconf.EADock3: Minimizing binding mode 3375, energy is 1645.3196, rmsd is 38.86323
sib.fastconf.EADock3: Minimizing binding mode 3376, energy is 1647.7927, rmsd is 64.089226
sib.fastconf.EADock3: Minimizing binding mode 3377, energy is 1649.6008, rmsd is 2.9505374
sib.fastconf.EADock3: Minimizing binding mode 3378, energy is 1649.847, rmsd is 12.127364
sib.fastconf.EADock3: Minimizing binding mode 3379, energy is 1649.8868, rmsd is 43.795235
sib.fastconf.EADock3: Minimizing binding mode 3380, energy is 1651.4983, rmsd is 40.697712
sib.fastconf.EADock3: Minimizing binding mode 3381, energy is 1651.5236, rmsd is 39.983543
sib.fastconf.EADock3: Minimizing binding mode 3382, energy is 1653.9795, rmsd is 49.42923
sib.fastconf.EADock3: Minimizing binding mode 3383, energy is 1655.1373, rmsd is 63.658714
sib.fastconf.EADock3: Minimizing binding mode 3384, energy is 1658.293, rmsd is 12.442781
sib.fastconf.EADock3: Minimizing binding mode 3385, energy is 1659.5508, rmsd is 13.1338005
sib.fastconf.EADock3: Minimizing binding mode 3386, energy is 1659.757, rmsd is 42.23964
sib.fastconf.EADock3: Minimizing binding mode 3387, energy is 1661.4088, rmsd is 31.807137
sib.fastconf.EADock3: Minimizing binding mode 3388, energy is 1663.1436, rmsd is 13.567571
sib.fastconf.EADock3: Minimizing binding mode 3389, energy is 1667.8319, rmsd is 14.025396
sib.fastconf.EADock3: Minimizing binding mode 3390, energy is 1670.2299, rmsd is 36.166737
sib.fastconf.EADock3: Minimizing binding mode 3391, energy is 1680.5765, rmsd is 32.388218
sib.fastconf.EADock3: Minimizing binding mode 3392, energy is 1688.2683, rmsd is 46.969624
sib.fastconf.EADock3: Minimizing binding mode 3393, energy is 1688.9358, rmsd is 48.004494
sib.fastconf.EADock3: Minimizing binding mode 3394, energy is 1689.4838, rmsd is 31.677572
sib.fastconf.EADock3: Minimizing binding mode 3395, energy is 1690.4702, rmsd is 46.558296
sib.fastconf.EADock3: Minimizing binding mode 3396, energy is 1690.8273, rmsd is 43.674343
sib.fastconf.EADock3: Minimizing binding mode 3397, energy is 1690.9908, rmsd is 40.821495
sib.fastconf.EADock3: Minimizing binding mode 3398, energy is 1693.6692, rmsd is 29.27679
sib.fastconf.EADock3: Minimizing binding mode 3399, energy is 1695.3789, rmsd is 50.043945
sib.fastconf.EADock3: Minimizing binding mode 3400, energy is 1696.2004, rmsd is 56.357407
sib.fastconf.EADock3: Minimizing binding mode 3401, energy is 1696.2834, rmsd is 43.4282
sib.fastconf.EADock3: Minimizing binding mode 3402, energy is 1696.4319, rmsd is 55.639927
sib.fastconf.EADock3: Minimizing binding mode 3403, energy is 1699.3672, rmsd is 41.3908
sib.fastconf.EADock3: Minimizing binding mode 3404, energy is 1699.6178, rmsd is 48.553806
sib.fastconf.EADock3: Minimizing binding mode 3405, energy is 1699.6864, rmsd is 49.04571
sib.fastconf.EADock3: Minimizing binding mode 3406, energy is 1701.3676, rmsd is 38.21886
sib.fastconf.EADock3: Minimizing binding mode 3407, energy is 1701.6892, rmsd is 59.89049
sib.fastconf.EADock3: Minimizing binding mode 3408, energy is 1703.7188, rmsd is 13.850798
sib.fastconf.EADock3: Minimizing binding mode 3409, energy is 1704.8992, rmsd is 43.19408
sib.fastconf.EADock3: Minimizing binding mode 3410, energy is 1705.0042, rmsd is 37.936306
sib.fastconf.EADock3: Minimizing binding mode 3411, energy is 1706.0721, rmsd is 46.73075
sib.fastconf.EADock3: Minimizing binding mode 3412, energy is 1709.907, rmsd is 63.103905
sib.fastconf.EADock3: Minimizing binding mode 3413, energy is 1716.7158, rmsd is 43.09656
sib.fastconf.EADock3: Minimizing binding mode 3414, energy is 1717.8049, rmsd is 64.30944
sib.fastconf.EADock3: Minimizing binding mode 3415, energy is 1721.1028, rmsd is 31.504929
sib.fastconf.EADock3: Minimizing binding mode 3416, energy is 1723.7084, rmsd is 49.30109
sib.fastconf.EADock3: Minimizing binding mode 3417, energy is 1726.0739, rmsd is 47.864624
sib.fastconf.EADock3: Minimizing binding mode 3418, energy is 1727.8474, rmsd is 36.120995
sib.fastconf.EADock3: Minimizing binding mode 3419, energy is 1729.6063, rmsd is 16.208858
sib.fastconf.EADock3: Minimizing binding mode 3420, energy is 1738.9633, rmsd is 42.44444
sib.fastconf.EADock3: Minimizing binding mode 3421, energy is 1739.5222, rmsd is 39.568108
sib.fastconf.EADock3: Minimizing binding mode 3422, energy is 1739.6633, rmsd is 64.98017
sib.fastconf.EADock3: Minimizing binding mode 3423, energy is 1740.3219, rmsd is 37.11601
sib.fastconf.EADock3: Minimizing binding mode 3424, energy is 1741.5808, rmsd is 3.44495
sib.fastconf.EADock3: Minimizing binding mode 3425, energy is 1741.6418, rmsd is 39.118702
sib.fastconf.EADock3: Minimizing binding mode 3426, energy is 1741.7864, rmsd is 40.968315
sib.fastconf.EADock3: Minimizing binding mode 3427, energy is 1742.1727, rmsd is 12.481322
sib.fastconf.EADock3: Minimizing binding mode 3428, energy is 1745.2892, rmsd is 64.02751
sib.fastconf.EADock3: Minimizing binding mode 3429, energy is 1745.9922, rmsd is 47.149117
sib.fastconf.EADock3: Minimizing binding mode 3430, energy is 1747.6608, rmsd is 12.741627
sib.fastconf.EADock3: Minimizing binding mode 3431, energy is 1749.4546, rmsd is 3.4893816
sib.fastconf.EADock3: Minimizing binding mode 3432, energy is 1750.808, rmsd is 12.552783
sib.fastconf.EADock3: Minimizing binding mode 3433, energy is 1750.9036, rmsd is 63.835464
sib.fastconf.EADock3: Minimizing binding mode 3434, energy is 1755.8257, rmsd is 45.441536
sib.fastconf.EADock3: Minimizing binding mode 3435, energy is 1759.1317, rmsd is 11.000998
sib.fastconf.EADock3: Minimizing binding mode 3436, energy is 1759.981, rmsd is 12.200551
sib.fastconf.EADock3: Minimizing binding mode 3437, energy is 1763.5514, rmsd is 30.717058
sib.fastconf.EADock3: Minimizing binding mode 3438, energy is 1767.4874, rmsd is 37.351692
sib.fastconf.EADock3: Minimizing binding mode 3439, energy is 1768.0636, rmsd is 36.597126
sib.fastconf.EADock3: Minimizing binding mode 3440, energy is 1769.1711, rmsd is 13.656067
sib.fastconf.EADock3: Minimizing binding mode 3441, energy is 1775.3955, rmsd is 64.50694
sib.fastconf.EADock3: Minimizing binding mode 3442, energy is 1775.7817, rmsd is 37.275833
sib.fastconf.EADock3: Minimizing binding mode 3443, energy is 1776.9244, rmsd is 11.502573
sib.fastconf.EADock3: Minimizing binding mode 3444, energy is 1777.8529, rmsd is 63.86961
sib.fastconf.EADock3: Minimizing binding mode 3445, energy is 1778.1389, rmsd is 39.38243
sib.fastconf.EADock3: Minimizing binding mode 3446, energy is 1779.4207, rmsd is 3.075254
sib.fastconf.EADock3: Minimizing binding mode 3447, energy is 1779.4536, rmsd is 37.13462
sib.fastconf.EADock3: Minimizing binding mode 3448, energy is 1782.2349, rmsd is 33.060356
sib.fastconf.EADock3: Minimizing binding mode 3449, energy is 1786.4381, rmsd is 53.974037
sib.fastconf.EADock3: Minimizing binding mode 3450, energy is 1787.4613, rmsd is 64.21016
sib.fastconf.EADock3: Minimizing binding mode 3451, energy is 1789.0702, rmsd is 48.451977
sib.fastconf.EADock3: Minimizing binding mode 3452, energy is 1790.9944, rmsd is 31.490473
sib.fastconf.EADock3: Minimizing binding mode 3453, energy is 1796.2275, rmsd is 30.011122
sib.fastconf.EADock3: Minimizing binding mode 3454, energy is 1798.5696, rmsd is 37.944042
sib.fastconf.EADock3: Minimizing binding mode 3455, energy is 1801.711, rmsd is 2.257491
sib.fastconf.EADock3: Minimizing binding mode 3456, energy is 1801.7864, rmsd is 32.867367
sib.fastconf.EADock3: Minimizing binding mode 3457, energy is 1802.9281, rmsd is 52.80195
sib.fastconf.EADock3: Minimizing binding mode 3458, energy is 1802.9996, rmsd is 36.622223
sib.fastconf.EADock3: Minimizing binding mode 3459, energy is 1803.2881, rmsd is 55.686836
sib.fastconf.EADock3: Minimizing binding mode 3460, energy is 1803.6705, rmsd is 46.26659
sib.fastconf.EADock3: Minimizing binding mode 3461, energy is 1803.9799, rmsd is 32.386856
sib.fastconf.EADock3: Minimizing binding mode 3462, energy is 1808.4019, rmsd is 41.992027
sib.fastconf.EADock3: Minimizing binding mode 3463, energy is 1810.0382, rmsd is 54.708492
sib.fastconf.EADock3: Minimizing binding mode 3464, energy is 1812.5558, rmsd is 42.233868
sib.fastconf.EADock3: Minimizing binding mode 3465, energy is 1813.042, rmsd is 40.291527
sib.fastconf.EADock3: Minimizing binding mode 3466, energy is 1815.4703, rmsd is 52.94234
sib.fastconf.EADock3: Minimizing binding mode 3467, energy is 1818.9812, rmsd is 30.968649
sib.fastconf.EADock3: Minimizing binding mode 3468, energy is 1820.4155, rmsd is 36.29603
sib.fastconf.EADock3: Minimizing binding mode 3469, energy is 1821.71, rmsd is 39.837826
sib.fastconf.EADock3: Minimizing binding mode 3470, energy is 1822.6986, rmsd is 13.190283
sib.fastconf.EADock3: Minimizing binding mode 3471, energy is 1823.1183, rmsd is 15.55812
sib.fastconf.EADock3: Minimizing binding mode 3472, energy is 1823.8965, rmsd is 12.426807
sib.fastconf.EADock3: Minimizing binding mode 3473, energy is 1824.9409, rmsd is 29.95452
sib.fastconf.EADock3: Minimizing binding mode 3474, energy is 1826.3682, rmsd is 15.452242
sib.fastconf.EADock3: Minimizing binding mode 3475, energy is 1826.8557, rmsd is 13.9092
sib.fastconf.EADock3: Minimizing binding mode 3476, energy is 1835.8732, rmsd is 63.543068
sib.fastconf.EADock3: Minimizing binding mode 3477, energy is 1839.5443, rmsd is 14.330375
sib.fastconf.EADock3: Minimizing binding mode 3478, energy is 1840.7476, rmsd is 29.9086
sib.fastconf.EADock3: Minimizing binding mode 3479, energy is 1841.2122, rmsd is 3.704501
sib.fastconf.EADock3: Minimizing binding mode 3480, energy is 1842.182, rmsd is 38.64912
sib.fastconf.EADock3: Minimizing binding mode 3481, energy is 1845.7118, rmsd is 37.92546
sib.fastconf.EADock3: Minimizing binding mode 3482, energy is 1847.0011, rmsd is 29.039902
sib.fastconf.EADock3: Minimizing binding mode 3483, energy is 1849.1589, rmsd is 43.636227
sib.fastconf.EADock3: Minimizing binding mode 3484, energy is 1855.5781, rmsd is 64.20889
sib.fastconf.EADock3: Minimizing binding mode 3485, energy is 1856.7997, rmsd is 52.983143
sib.fastconf.EADock3: Minimizing binding mode 3486, energy is 1858.6283, rmsd is 38.077118
sib.fastconf.EADock3: Minimizing binding mode 3487, energy is 1860.9587, rmsd is 14.178948
sib.fastconf.EADock3: Minimizing binding mode 3488, energy is 1861.4656, rmsd is 3.0368986
sib.fastconf.EADock3: Minimizing binding mode 3489, energy is 1863.8828, rmsd is 13.113404
sib.fastconf.EADock3: Minimizing binding mode 3490, energy is 1865.1056, rmsd is 37.325123
sib.fastconf.EADock3: Minimizing binding mode 3491, energy is 1868.8184, rmsd is 48.01394
sib.fastconf.EADock3: Minimizing binding mode 3492, energy is 1872.1543, rmsd is 13.046182
sib.fastconf.EADock3: Minimizing binding mode 3493, energy is 1873.5503, rmsd is 46.88114
sib.fastconf.EADock3: Minimizing binding mode 3494, energy is 1880.2908, rmsd is 38.05051
sib.fastconf.EADock3: Minimizing binding mode 3495, energy is 1885.4402, rmsd is 37.743465
sib.fastconf.EADock3: Minimizing binding mode 3496, energy is 1887.1537, rmsd is 30.944778
sib.fastconf.EADock3: Minimizing binding mode 3497, energy is 1887.2683, rmsd is 32.72706
sib.fastconf.EADock3: Minimizing binding mode 3498, energy is 1887.7776, rmsd is 58.04806
sib.fastconf.EADock3: Minimizing binding mode 3499, energy is 1889.5054, rmsd is 47.612175
sib.fastconf.EADock3: Minimizing binding mode 3500, energy is 1890.8695, rmsd is 44.82749
sib.fastconf.EADock3: Minimizing binding mode 3501, energy is 1891.1935, rmsd is 65.07136
sib.fastconf.EADock3: Minimizing binding mode 3502, energy is 1894.0872, rmsd is 62.90762
sib.fastconf.EADock3: Minimizing binding mode 3503, energy is 1897.2496, rmsd is 12.29926
sib.fastconf.EADock3: Minimizing binding mode 3504, energy is 1897.9896, rmsd is 11.41922
sib.fastconf.EADock3: Minimizing binding mode 3505, energy is 1899.4854, rmsd is 65.17745
sib.fastconf.EADock3: Minimizing binding mode 3506, energy is 1905.4458, rmsd is 54.766422
sib.fastconf.EADock3: Minimizing binding mode 3507, energy is 1906.1688, rmsd is 65.77309
sib.fastconf.EADock3: Minimizing binding mode 3508, energy is 1907.298, rmsd is 30.809149
sib.fastconf.EADock3: Minimizing binding mode 3509, energy is 1907.6475, rmsd is 38.89875
sib.fastconf.EADock3: Minimizing binding mode 3510, energy is 1908.0867, rmsd is 46.397243
sib.fastconf.EADock3: Minimizing binding mode 3511, energy is 1908.9937, rmsd is 64.11306
sib.fastconf.EADock3: Minimizing binding mode 3512, energy is 1909.6721, rmsd is 47.448112
sib.fastconf.EADock3: Minimizing binding mode 3513, energy is 1916.8754, rmsd is 43.21482
sib.fastconf.EADock3: Minimizing binding mode 3514, energy is 1918.5541, rmsd is 53.795185
sib.fastconf.EADock3: Minimizing binding mode 3515, energy is 1918.8833, rmsd is 43.606216
sib.fastconf.EADock3: Minimizing binding mode 3516, energy is 1921.6135, rmsd is 13.358935
sib.fastconf.EADock3: Minimizing binding mode 3517, energy is 1921.72, rmsd is 54.42905
sib.fastconf.EADock3: Minimizing binding mode 3518, energy is 1923.3818, rmsd is 66.20673
sib.fastconf.EADock3: Minimizing binding mode 3519, energy is 1924.212, rmsd is 48.655643
sib.fastconf.EADock3: Minimizing binding mode 3520, energy is 1928.7576, rmsd is 12.258975
sib.fastconf.EADock3: Minimizing binding mode 3521, energy is 1931.1838, rmsd is 10.598363
sib.fastconf.EADock3: Minimizing binding mode 3522, energy is 1932.6216, rmsd is 12.233936
sib.fastconf.EADock3: Minimizing binding mode 3523, energy is 1936.4866, rmsd is 43.35299
sib.fastconf.EADock3: Minimizing binding mode 3524, energy is 1939.3284, rmsd is 29.82272
sib.fastconf.EADock3: Minimizing binding mode 3525, energy is 1941.1057, rmsd is 46.21352
sib.fastconf.EADock3: Minimizing binding mode 3526, energy is 1943.8491, rmsd is 46.320137
sib.fastconf.EADock3: Minimizing binding mode 3527, energy is 1944.6449, rmsd is 39.7397
sib.fastconf.EADock3: Minimizing binding mode 3528, energy is 1944.727, rmsd is 46.298096
sib.fastconf.EADock3: Minimizing binding mode 3529, energy is 1946.3334, rmsd is 49.085403
sib.fastconf.EADock3: Minimizing binding mode 3530, energy is 1946.5016, rmsd is 16.453344
sib.fastconf.EADock3: Minimizing binding mode 3531, energy is 1949.0809, rmsd is 38.516872
sib.fastconf.EADock3: Minimizing binding mode 3532, energy is 1949.6329, rmsd is 50.524734
sib.fastconf.EADock3: Minimizing binding mode 3533, energy is 1958.911, rmsd is 14.644917
sib.fastconf.EADock3: Minimizing binding mode 3534, energy is 1960.2418, rmsd is 63.742393
sib.fastconf.EADock3: Minimizing binding mode 3535, energy is 1961.0009, rmsd is 53.006535
sib.fastconf.EADock3: Minimizing binding mode 3536, energy is 1962.5662, rmsd is 33.970276
sib.fastconf.EADock3: Minimizing binding mode 3537, energy is 1963.4216, rmsd is 37.73545
sib.fastconf.EADock3: Minimizing binding mode 3538, energy is 1966.9647, rmsd is 2.7273774
sib.fastconf.EADock3: Minimizing binding mode 3539, energy is 1968.0509, rmsd is 48.745293
sib.fastconf.EADock3: Minimizing binding mode 3540, energy is 1972.134, rmsd is 32.029774
sib.fastconf.EADock3: Minimizing binding mode 3541, energy is 1975.763, rmsd is 41.317352
sib.fastconf.EADock3: Minimizing binding mode 3542, energy is 1978.2094, rmsd is 47.653557
sib.fastconf.EADock3: Minimizing binding mode 3543, energy is 1978.6404, rmsd is 41.420216
sib.fastconf.EADock3: Minimizing binding mode 3544, energy is 1981.2821, rmsd is 33.524315
sib.fastconf.EADock3: Minimizing binding mode 3545, energy is 1986.5216, rmsd is 47.56407
sib.fastconf.EADock3: Minimizing binding mode 3546, energy is 1994.3861, rmsd is 49.34286
sib.fastconf.EADock3: Minimizing binding mode 3547, energy is 1994.6487, rmsd is 40.951466
sib.fastconf.EADock3: Minimizing binding mode 3548, energy is 1994.769, rmsd is 31.942072
sib.fastconf.EADock3: Minimizing binding mode 3549, energy is 1994.9485, rmsd is 64.500534
sib.fastconf.EADock3: Minimizing binding mode 3550, energy is 1996.2015, rmsd is 28.179739
sib.fastconf.EADock3: Minimizing binding mode 3551, energy is 1996.5161, rmsd is 41.86911
sib.fastconf.EADock3: Minimizing binding mode 3552, energy is 2003.2897, rmsd is 46.220314
sib.fastconf.EADock3: Minimizing binding mode 3553, energy is 2005.7035, rmsd is 46.846428
sib.fastconf.EADock3: Minimizing binding mode 3554, energy is 2008.2323, rmsd is 48.144726
sib.fastconf.EADock3: Minimizing binding mode 3555, energy is 2009.9152, rmsd is 63.052715
sib.fastconf.EADock3: Minimizing binding mode 3556, energy is 2012.6007, rmsd is 16.023882
sib.fastconf.EADock3: Minimizing binding mode 3557, energy is 2014.0437, rmsd is 15.8232565
sib.fastconf.EADock3: Minimizing binding mode 3558, energy is 2015.9309, rmsd is 46.83178
sib.fastconf.EADock3: Minimizing binding mode 3559, energy is 2016.9811, rmsd is 29.580645
sib.fastconf.EADock3: Minimizing binding mode 3560, energy is 2021.3491, rmsd is 67.91079
sib.fastconf.EADock3: Minimizing binding mode 3561, energy is 2023.5259, rmsd is 63.712746
sib.fastconf.EADock3: Minimizing binding mode 3562, energy is 2025.1317, rmsd is 50.453796
sib.fastconf.EADock3: Minimizing binding mode 3563, energy is 2027.0205, rmsd is 38.85963
sib.fastconf.EADock3: Minimizing binding mode 3564, energy is 2027.3977, rmsd is 15.344219
sib.fastconf.EADock3: Minimizing binding mode 3565, energy is 2031.8184, rmsd is 31.446749
sib.fastconf.EADock3: Minimizing binding mode 3566, energy is 2035.7797, rmsd is 42.32269
sib.fastconf.EADock3: Minimizing binding mode 3567, energy is 2037.2277, rmsd is 34.564476
sib.fastconf.EADock3: Minimizing binding mode 3568, energy is 2040.8049, rmsd is 46.479855
sib.fastconf.EADock3: Minimizing binding mode 3569, energy is 2043.6016, rmsd is 38.321144
sib.fastconf.EADock3: Minimizing binding mode 3570, energy is 2043.7267, rmsd is 47.321407
sib.fastconf.EADock3: Minimizing binding mode 3571, energy is 2047.4276, rmsd is 15.088653
sib.fastconf.EADock3: Minimizing binding mode 3572, energy is 2047.7594, rmsd is 32.161373
sib.fastconf.EADock3: Minimizing binding mode 3573, energy is 2053.0664, rmsd is 48.993534
sib.fastconf.EADock3: Minimizing binding mode 3574, energy is 2054.41, rmsd is 29.88517
sib.fastconf.EADock3: Minimizing binding mode 3575, energy is 2054.4443, rmsd is 53.568996
sib.fastconf.EADock3: Minimizing binding mode 3576, energy is 2060.15, rmsd is 35.41996
sib.fastconf.EADock3: Minimizing binding mode 3577, energy is 2061.821, rmsd is 32.879856
sib.fastconf.EADock3: Minimizing binding mode 3578, energy is 2066.0125, rmsd is 46.405712
sib.fastconf.EADock3: Minimizing binding mode 3579, energy is 2066.6443, rmsd is 35.598415
sib.fastconf.EADock3: Minimizing binding mode 3580, energy is 2066.7615, rmsd is 31.60515
sib.fastconf.EADock3: Minimizing binding mode 3581, energy is 2066.8152, rmsd is 13.66414
sib.fastconf.EADock3: Minimizing binding mode 3582, energy is 2068.2695, rmsd is 41.724045
sib.fastconf.EADock3: Minimizing binding mode 3583, energy is 2079.1047, rmsd is 49.50437
sib.fastconf.EADock3: Minimizing binding mode 3584, energy is 2084.8955, rmsd is 40.2837
sib.fastconf.EADock3: Minimizing binding mode 3585, energy is 2084.904, rmsd is 40.160194
sib.fastconf.EADock3: Minimizing binding mode 3586, energy is 2087.0742, rmsd is 44.228783
sib.fastconf.EADock3: Minimizing binding mode 3587, energy is 2089.7236, rmsd is 64.720024
sib.fastconf.EADock3: Minimizing binding mode 3588, energy is 2093.3782, rmsd is 47.152386
sib.fastconf.EADock3: Minimizing binding mode 3589, energy is 2098.598, rmsd is 48.069515
sib.fastconf.EADock3: Minimizing binding mode 3590, energy is 2099.6416, rmsd is 36.276615
sib.fastconf.EADock3: Minimizing binding mode 3591, energy is 2103.117, rmsd is 49.347237
sib.fastconf.EADock3: Minimizing binding mode 3592, energy is 2103.1575, rmsd is 13.585568
sib.fastconf.EADock3: Minimizing binding mode 3593, energy is 2106.8118, rmsd is 61.717422
sib.fastconf.EADock3: Minimizing binding mode 3594, energy is 2123.109, rmsd is 33.675686
sib.fastconf.EADock3: Minimizing binding mode 3595, energy is 2123.2412, rmsd is 51.487743
sib.fastconf.EADock3: Minimizing binding mode 3596, energy is 2127.3303, rmsd is 39.253815
sib.fastconf.EADock3: Minimizing binding mode 3597, energy is 2129.0542, rmsd is 48.43064
sib.fastconf.EADock3: Minimizing binding mode 3598, energy is 2131.6704, rmsd is 47.00639
sib.fastconf.EADock3: Minimizing binding mode 3599, energy is 2132.0186, rmsd is 31.734024
sib.fastconf.EADock3: Minimizing binding mode 3600, energy is 2134.8923, rmsd is 44.112114
sib.fastconf.EADock3: Minimizing binding mode 3601, energy is 2135.0352, rmsd is 34.24193
sib.fastconf.EADock3: Minimizing binding mode 3602, energy is 2135.7048, rmsd is 46.883198
sib.fastconf.EADock3: Minimizing binding mode 3603, energy is 2136.647, rmsd is 30.708702
sib.fastconf.EADock3: Minimizing binding mode 3604, energy is 2145.9944, rmsd is 33.82868
sib.fastconf.EADock3: Minimizing binding mode 3605, energy is 2148.586, rmsd is 43.56848
sib.fastconf.EADock3: Minimizing binding mode 3606, energy is 2148.6797, rmsd is 14.083992
sib.fastconf.EADock3: Minimizing binding mode 3607, energy is 2154.4922, rmsd is 32.465973
sib.fastconf.EADock3: Minimizing binding mode 3608, energy is 2159.8972, rmsd is 47.704216
sib.fastconf.EADock3: Minimizing binding mode 3609, energy is 2160.9126, rmsd is 49.13295
sib.fastconf.EADock3: Minimizing binding mode 3610, energy is 2165.3499, rmsd is 30.98599
sib.fastconf.EADock3: Minimizing binding mode 3611, energy is 2167.4302, rmsd is 48.90155
sib.fastconf.EADock3: Minimizing binding mode 3612, energy is 2168.4077, rmsd is 14.870188
sib.fastconf.EADock3: Minimizing binding mode 3613, energy is 2171.9138, rmsd is 42.60718
sib.fastconf.EADock3: Minimizing binding mode 3614, energy is 2175.7605, rmsd is 30.786549
sib.fastconf.EADock3: Minimizing binding mode 3615, energy is 2178.4617, rmsd is 46.62982
sib.fastconf.EADock3: Minimizing binding mode 3616, energy is 2186.0864, rmsd is 14.287814
sib.fastconf.EADock3: Minimizing binding mode 3617, energy is 2187.0825, rmsd is 50.970074
sib.fastconf.EADock3: Minimizing binding mode 3618, energy is 2192.295, rmsd is 34.3397
sib.fastconf.EADock3: Minimizing binding mode 3619, energy is 2197.5034, rmsd is 32.301144
sib.fastconf.EADock3: Minimizing binding mode 3620, energy is 2199.4092, rmsd is 40.361275
sib.fastconf.EADock3: Minimizing binding mode 3621, energy is 2200.702, rmsd is 41.632442
sib.fastconf.EADock3: Minimizing binding mode 3622, energy is 2200.7278, rmsd is 38.211292
sib.fastconf.EADock3: Minimizing binding mode 3623, energy is 2202.9436, rmsd is 63.722248
sib.fastconf.EADock3: Minimizing binding mode 3624, energy is 2204.52, rmsd is 13.085716
sib.fastconf.EADock3: Minimizing binding mode 3625, energy is 2206.4524, rmsd is 63.79114
sib.fastconf.EADock3: Minimizing binding mode 3626, energy is 2209.048, rmsd is 39.827194
sib.fastconf.EADock3: Minimizing binding mode 3627, energy is 2221.43, rmsd is 63.41766
sib.fastconf.EADock3: Minimizing binding mode 3628, energy is 2222.3289, rmsd is 46.185738
sib.fastconf.EADock3: Minimizing binding mode 3629, energy is 2224.1013, rmsd is 45.804646
sib.fastconf.EADock3: Minimizing binding mode 3630, energy is 2227.0671, rmsd is 40.87789
sib.fastconf.EADock3: Minimizing binding mode 3631, energy is 2229.613, rmsd is 28.390556
sib.fastconf.EADock3: Minimizing binding mode 3632, energy is 2229.8428, rmsd is 53.134857
sib.fastconf.EADock3: Minimizing binding mode 3633, energy is 2236.5972, rmsd is 39.228745
sib.fastconf.EADock3: Minimizing binding mode 3634, energy is 2239.0393, rmsd is 39.04119
sib.fastconf.EADock3: Minimizing binding mode 3635, energy is 2240.3633, rmsd is 36.937485
sib.fastconf.EADock3: Minimizing binding mode 3636, energy is 2248.3694, rmsd is 39.40206
sib.fastconf.EADock3: Minimizing binding mode 3637, energy is 2250.5823, rmsd is 43.281807
sib.fastconf.EADock3: Minimizing binding mode 3638, energy is 2250.812, rmsd is 9.988057
sib.fastconf.EADock3: Minimizing binding mode 3639, energy is 2253.04, rmsd is 33.431023
sib.fastconf.EADock3: Minimizing binding mode 3640, energy is 2256.4104, rmsd is 28.692429
sib.fastconf.EADock3: Minimizing binding mode 3641, energy is 2259.2632, rmsd is 64.92814
sib.fastconf.EADock3: Minimizing binding mode 3642, energy is 2260.4731, rmsd is 33.59867
sib.fastconf.EADock3: Minimizing binding mode 3643, energy is 2266.0212, rmsd is 47.177464
sib.fastconf.EADock3: Minimizing binding mode 3644, energy is 2267.836, rmsd is 14.648745
sib.fastconf.EADock3: Minimizing binding mode 3645, energy is 2269.9602, rmsd is 45.974422
sib.fastconf.EADock3: Minimizing binding mode 3646, energy is 2277.6016, rmsd is 1.8867242
sib.fastconf.EADock3: Minimizing binding mode 3647, energy is 2281.0447, rmsd is 51.86531
sib.fastconf.EADock3: Minimizing binding mode 3648, energy is 2286.725, rmsd is 66.44363
sib.fastconf.EADock3: Minimizing binding mode 3649, energy is 2287.3762, rmsd is 47.044453
sib.fastconf.EADock3: Minimizing binding mode 3650, energy is 2288.0393, rmsd is 52.75309
sib.fastconf.EADock3: Minimizing binding mode 3651, energy is 2299.1753, rmsd is 49.806458
sib.fastconf.EADock3: Minimizing binding mode 3652, energy is 2299.5596, rmsd is 29.885794
sib.fastconf.EADock3: Minimizing binding mode 3653, energy is 2314.9526, rmsd is 46.64352
sib.fastconf.EADock3: Minimizing binding mode 3654, energy is 2317.8582, rmsd is 29.886366
sib.fastconf.EADock3: Minimizing binding mode 3655, energy is 2320.849, rmsd is 49.330124
sib.fastconf.EADock3: Minimizing binding mode 3656, energy is 2327.7222, rmsd is 40.484505
sib.fastconf.EADock3: Minimizing binding mode 3657, energy is 2331.247, rmsd is 48.678753
sib.fastconf.EADock3: Minimizing binding mode 3658, energy is 2332.9236, rmsd is 49.22567
sib.fastconf.EADock3: Minimizing binding mode 3659, energy is 2335.722, rmsd is 48.059914
sib.fastconf.EADock3: Minimizing binding mode 3660, energy is 2341.018, rmsd is 47.393612
sib.fastconf.EADock3: Minimizing binding mode 3661, energy is 2342.8867, rmsd is 37.095123
sib.fastconf.EADock3: Minimizing binding mode 3662, energy is 2352.124, rmsd is 53.736557
sib.fastconf.EADock3: Minimizing binding mode 3663, energy is 2356.5356, rmsd is 51.663975
sib.fastconf.EADock3: Minimizing binding mode 3664, energy is 2356.8057, rmsd is 53.662167
sib.fastconf.EADock3: Minimizing binding mode 3665, energy is 2357.8948, rmsd is 13.944415
sib.fastconf.EADock3: Minimizing binding mode 3666, energy is 2368.0837, rmsd is 46.25006
sib.fastconf.EADock3: Minimizing binding mode 3667, energy is 2371.3713, rmsd is 64.87376
sib.fastconf.EADock3: Minimizing binding mode 3668, energy is 2379.0227, rmsd is 14.3951
sib.fastconf.EADock3: Minimizing binding mode 3669, energy is 2382.3203, rmsd is 39.694427
sib.fastconf.EADock3: Minimizing binding mode 3670, energy is 2386.8235, rmsd is 13.999038
sib.fastconf.EADock3: Minimizing binding mode 3671, energy is 2399.3743, rmsd is 37.814007
sib.fastconf.EADock3: Minimizing binding mode 3672, energy is 2399.4397, rmsd is 13.710632
sib.fastconf.EADock3: Minimizing binding mode 3673, energy is 2403.672, rmsd is 52.310394
sib.fastconf.EADock3: Minimizing binding mode 3674, energy is 2405.0527, rmsd is 41.28652
sib.fastconf.EADock3: Minimizing binding mode 3675, energy is 2405.5544, rmsd is 46.042133
sib.fastconf.EADock3: Minimizing binding mode 3676, energy is 2407.8953, rmsd is 40.649544
sib.fastconf.EADock3: Minimizing binding mode 3677, energy is 2407.9597, rmsd is 62.603508
sib.fastconf.EADock3: Minimizing binding mode 3678, energy is 2409.6409, rmsd is 33.853127
sib.fastconf.EADock3: Minimizing binding mode 3679, energy is 2420.3704, rmsd is 47.64961
sib.fastconf.EADock3: Minimizing binding mode 3680, energy is 2422.8528, rmsd is 49.07513
sib.fastconf.EADock3: Minimizing binding mode 3681, energy is 2426.1292, rmsd is 30.185966
sib.fastconf.EADock3: Minimizing binding mode 3682, energy is 2426.525, rmsd is 40.23203
sib.fastconf.EADock3: Minimizing binding mode 3683, energy is 2445.5378, rmsd is 36.160217
sib.fastconf.EADock3: Minimizing binding mode 3684, energy is 2446.485, rmsd is 51.013798
sib.fastconf.EADock3: Minimizing binding mode 3685, energy is 2449.9758, rmsd is 37.179127
sib.fastconf.EADock3: Minimizing binding mode 3686, energy is 2454.2107, rmsd is 33.06365
sib.fastconf.EADock3: Minimizing binding mode 3687, energy is 2454.5493, rmsd is 12.648802
sib.fastconf.EADock3: Minimizing binding mode 3688, energy is 2466.5337, rmsd is 31.63345
sib.fastconf.EADock3: Minimizing binding mode 3689, energy is 2467.5205, rmsd is 48.24131
sib.fastconf.EADock3: Minimizing binding mode 3690, energy is 2469.1553, rmsd is 30.211514
sib.fastconf.EADock3: Minimizing binding mode 3691, energy is 2473.7188, rmsd is 47.541973
sib.fastconf.EADock3: Minimizing binding mode 3692, energy is 2474.0593, rmsd is 34.28653
sib.fastconf.EADock3: Minimizing binding mode 3693, energy is 2485.526, rmsd is 50.736084
sib.fastconf.EADock3: Minimizing binding mode 3694, energy is 2486.0798, rmsd is 48.903812
sib.fastconf.EADock3: Minimizing binding mode 3695, energy is 2486.3171, rmsd is 14.769089
sib.fastconf.EADock3: Minimizing binding mode 3696, energy is 2506.9573, rmsd is 14.405927
sib.fastconf.EADock3: Minimizing binding mode 3697, energy is 2507.909, rmsd is 29.69235
sib.fastconf.EADock3: Minimizing binding mode 3698, energy is 2513.071, rmsd is 48.163296
sib.fastconf.EADock3: Minimizing binding mode 3699, energy is 2522.3472, rmsd is 40.743305
sib.fastconf.EADock3: Minimizing binding mode 3700, energy is 2526.9915, rmsd is 33.253662
sib.fastconf.EADock3: Minimizing binding mode 3701, energy is 2546.4126, rmsd is 50.41869
sib.fastconf.EADock3: Minimizing binding mode 3702, energy is 2554.1943, rmsd is 46.964268
sib.fastconf.EADock3: Minimizing binding mode 3703, energy is 2555.2231, rmsd is 40.9633
sib.fastconf.EADock3: Minimizing binding mode 3704, energy is 2577.647, rmsd is 36.668194
sib.fastconf.EADock3: Minimizing binding mode 3705, energy is 2582.2305, rmsd is 56.60693
sib.fastconf.EADock3: Minimizing binding mode 3706, energy is 2592.5344, rmsd is 28.582272
sib.fastconf.EADock3: Minimizing binding mode 3707, energy is 2602.4023, rmsd is 32.919094
sib.fastconf.EADock3: Minimizing binding mode 3708, energy is 2605.137, rmsd is 46.895916
sib.fastconf.EADock3: Minimizing binding mode 3709, energy is 2608.1743, rmsd is 34.435116
sib.fastconf.EADock3: Minimizing binding mode 3710, energy is 2614.1099, rmsd is 46.424023
sib.fastconf.EADock3: Minimizing binding mode 3711, energy is 2629.9739, rmsd is 40.955276
sib.fastconf.EADock3: Minimizing binding mode 3712, energy is 2634.8186, rmsd is 40.8165
sib.fastconf.EADock3: Minimizing binding mode 3713, energy is 2635.5217, rmsd is 13.487219
sib.fastconf.EADock3: Minimizing binding mode 3714, energy is 2661.011, rmsd is 40.205093
sib.fastconf.EADock3: Minimizing binding mode 3715, energy is 2665.7275, rmsd is 40.65843
sib.fastconf.EADock3: Minimizing binding mode 3716, energy is 2666.0342, rmsd is 37.275654
sib.fastconf.EADock3: Minimizing binding mode 3717, energy is 2668.979, rmsd is 46.3059
sib.fastconf.EADock3: Minimizing binding mode 3718, energy is 2669.5916, rmsd is 37.7472
sib.fastconf.EADock3: Minimizing binding mode 3719, energy is 2672.4424, rmsd is 31.332323
sib.fastconf.EADock3: Minimizing binding mode 3720, energy is 2672.7302, rmsd is 13.207775
sib.fastconf.EADock3: Minimizing binding mode 3721, energy is 2674.3171, rmsd is 32.21674
sib.fastconf.EADock3: Minimizing binding mode 3722, energy is 2675.9067, rmsd is 28.422731
sib.fastconf.EADock3: Minimizing binding mode 3723, energy is 2676.3264, rmsd is 38.39308
sib.fastconf.EADock3: Minimizing binding mode 3724, energy is 2678.064, rmsd is 29.058062
sib.fastconf.EADock3: Minimizing binding mode 3725, energy is 2689.4602, rmsd is 62.951878
sib.fastconf.EADock3: Minimizing binding mode 3726, energy is 2693.4646, rmsd is 37.009365
sib.fastconf.EADock3: Minimizing binding mode 3727, energy is 2700.4587, rmsd is 43.5167
sib.fastconf.EADock3: Minimizing binding mode 3728, energy is 2731.587, rmsd is 40.808952
sib.fastconf.EADock3: Minimizing binding mode 3729, energy is 2742.3938, rmsd is 32.70664
sib.fastconf.EADock3: Minimizing binding mode 3730, energy is 2742.9119, rmsd is 50.519817
sib.fastconf.EADock3: Minimizing binding mode 3731, energy is 2754.6704, rmsd is 46.55079
sib.fastconf.EADock3: Minimizing binding mode 3732, energy is 2756.6384, rmsd is 30.817291
sib.fastconf.EADock3: Minimizing binding mode 3733, energy is 2757.0962, rmsd is 61.70997
sib.fastconf.EADock3: Minimizing binding mode 3734, energy is 2758.4634, rmsd is 52.715065
sib.fastconf.EADock3: Minimizing binding mode 3735, energy is 2758.811, rmsd is 44.01469
sib.fastconf.EADock3: Minimizing binding mode 3736, energy is 2762.6133, rmsd is 35.26938
sib.fastconf.EADock3: Minimizing binding mode 3737, energy is 2778.5713, rmsd is 40.01398
sib.fastconf.EADock3: Minimizing binding mode 3738, energy is 2788.8806, rmsd is 49.793064
sib.fastconf.EADock3: Minimizing binding mode 3739, energy is 2792.5076, rmsd is 49.372986
sib.fastconf.EADock3: Minimizing binding mode 3740, energy is 2793.189, rmsd is 37.731964
sib.fastconf.EADock3: Minimizing binding mode 3741, energy is 2798.1052, rmsd is 53.530857
sib.fastconf.EADock3: Minimizing binding mode 3742, energy is 2798.3098, rmsd is 15.073737
sib.fastconf.EADock3: Minimizing binding mode 3743, energy is 2802.0884, rmsd is 38.391083
sib.fastconf.EADock3: Minimizing binding mode 3744, energy is 2803.1135, rmsd is 3.117945
sib.fastconf.EADock3: Minimizing binding mode 3745, energy is 2809.5144, rmsd is 48.799892
sib.fastconf.EADock3: Minimizing binding mode 3746, energy is 2820.071, rmsd is 14.120875
sib.fastconf.EADock3: Minimizing binding mode 3747, energy is 2838.1492, rmsd is 51.540077
sib.fastconf.EADock3: Minimizing binding mode 3748, energy is 2840.3037, rmsd is 46.465008
sib.fastconf.EADock3: Minimizing binding mode 3749, energy is 2859.9436, rmsd is 35.35065
sib.fastconf.EADock3: Minimizing binding mode 3750, energy is 2863.0452, rmsd is 15.909518
sib.fastconf.EADock3: Minimizing binding mode 3751, energy is 2869.294, rmsd is 62.94164
sib.fastconf.EADock3: Minimizing binding mode 3752, energy is 2875.8896, rmsd is 18.8602
sib.fastconf.EADock3: Minimizing binding mode 3753, energy is 2898.5884, rmsd is 13.53497
sib.fastconf.EADock3: Minimizing binding mode 3754, energy is 2899.4792, rmsd is 37.331493
sib.fastconf.EADock3: Minimizing binding mode 3755, energy is 2900.266, rmsd is 59.79391
sib.fastconf.EADock3: Minimizing binding mode 3756, energy is 2907.7852, rmsd is 47.518925
sib.fastconf.EADock3: Minimizing binding mode 3757, energy is 2916.8416, rmsd is 50.84437
sib.fastconf.EADock3: Minimizing binding mode 3758, energy is 2921.8118, rmsd is 22.064663
sib.fastconf.EADock3: Minimizing binding mode 3759, energy is 2922.034, rmsd is 13.751404
sib.fastconf.EADock3: Minimizing binding mode 3760, energy is 2925.6501, rmsd is 40.933792
sib.fastconf.EADock3: Minimizing binding mode 3761, energy is 2926.5823, rmsd is 28.018366
sib.fastconf.EADock3: Minimizing binding mode 3762, energy is 2929.097, rmsd is 52.1044
sib.fastconf.EADock3: Minimizing binding mode 3763, energy is 2934.6353, rmsd is 48.013664
sib.fastconf.EADock3: Minimizing binding mode 3764, energy is 2944.628, rmsd is 50.267574
sib.fastconf.EADock3: Minimizing binding mode 3765, energy is 2969.2034, rmsd is 31.019472
sib.fastconf.EADock3: Minimizing binding mode 3766, energy is 3016.8994, rmsd is 38.83407
sib.fastconf.EADock3: Minimizing binding mode 3767, energy is 3024.9084, rmsd is 47.033512
sib.fastconf.EADock3: Minimizing binding mode 3768, energy is 3042.9292, rmsd is 41.359287
sib.fastconf.EADock3: Minimizing binding mode 3769, energy is 3075.6206, rmsd is 20.14107
sib.fastconf.EADock3: Minimizing binding mode 3770, energy is 3084.6956, rmsd is 40.383392
sib.fastconf.EADock3: Minimizing binding mode 3771, energy is 3086.174, rmsd is 45.72055
sib.fastconf.EADock3: Minimizing binding mode 3772, energy is 3100.5322, rmsd is 21.394644
sib.fastconf.EADock3: Minimizing binding mode 3773, energy is 3144.343, rmsd is 36.250526
sib.fastconf.EADock3: Minimizing binding mode 3774, energy is 3162.802, rmsd is 29.383333
sib.fastconf.EADock3: Minimizing binding mode 3775, energy is 3187.577, rmsd is 51.10228
sib.fastconf.EADock3: Minimizing binding mode 3776, energy is 3232.3257, rmsd is 49.020885
sib.fastconf.EADock3: Minimizing binding mode 3777, energy is 3234.5242, rmsd is 53.456554
sib.fastconf.EADock3: Minimizing binding mode 3778, energy is 3251.7422, rmsd is 46.780087
sib.fastconf.EADock3: Minimizing binding mode 3779, energy is 3257.7388, rmsd is 39.87128
sib.fastconf.EADock3: Minimizing binding mode 3780, energy is 3260.881, rmsd is 51.303196
sib.fastconf.EADock3: Minimizing binding mode 3781, energy is 3269.014, rmsd is 14.45527
sib.fastconf.EADock3: Minimizing binding mode 3782, energy is 3271.3174, rmsd is 51.59667
sib.fastconf.EADock3: Minimizing binding mode 3783, energy is 3280.672, rmsd is 30.761978
sib.fastconf.EADock3: Minimizing binding mode 3784, energy is 3302.452, rmsd is 46.923126
sib.fastconf.EADock3: Minimizing binding mode 3785, energy is 3345.2983, rmsd is 55.432064
sib.fastconf.EADock3: Minimizing binding mode 3786, energy is 3357.6538, rmsd is 50.15276
sib.fastconf.EADock3: Minimizing binding mode 3787, energy is 3377.715, rmsd is 51.865715
sib.fastconf.EADock3: Minimizing binding mode 3788, energy is 3379.221, rmsd is 30.963507
sib.fastconf.EADock3: Minimizing binding mode 3789, energy is 3391.4287, rmsd is 46.381283
sib.fastconf.EADock3: Minimizing binding mode 3790, energy is 3400.1516, rmsd is 32.97402
sib.fastconf.EADock3: Minimizing binding mode 3791, energy is 3442.956, rmsd is 45.820263
sib.fastconf.EADock3: Minimizing binding mode 3792, energy is 3470.0303, rmsd is 26.65457
sib.fastconf.EADock3: Minimizing binding mode 3793, energy is 3543.983, rmsd is 31.68703
sib.fastconf.EADock3: Minimizing binding mode 3794, energy is 3574.8936, rmsd is 32.489964
sib.fastconf.EADock3: Minimizing binding mode 3795, energy is 3630.0227, rmsd is 15.899816
sib.fastconf.EADock3: Minimizing binding mode 3796, energy is 3663.0632, rmsd is 31.104403
sib.fastconf.EADock3: Minimizing binding mode 3797, energy is 3695.402, rmsd is 44.638996
sib.fastconf.EADock3: Minimizing binding mode 3798, energy is 3732.8171, rmsd is 41.023556
sib.fastconf.EADock3: Minimizing binding mode 3799, energy is 3749.347, rmsd is 62.88248
sib.fastconf.EADock3: Minimizing binding mode 3800, energy is 3752.3816, rmsd is 52.839024
sib.fastconf.EADock3: Minimizing binding mode 3801, energy is 3765.3833, rmsd is 36.899067
sib.fastconf.EADock3: Minimizing binding mode 3802, energy is 3867.488, rmsd is 47.714848
sib.fastconf.EADock3: Minimizing binding mode 3803, energy is 3889.112, rmsd is 17.481728
sib.fastconf.EADock3: Minimizing binding mode 3804, energy is 4059.3345, rmsd is 55.007862
sib.fastconf.EADock3: Minimizing binding mode 3805, energy is 4160.1924, rmsd is 56.423172
sib.fastconf.EADock3: Minimizing binding mode 3806, energy is 4161.6064, rmsd is 51.892246
sib.fastconf.EADock3: Minimizing binding mode 3807, energy is 4240.0527, rmsd is 62.78736
sib.fastconf.EADock3: Minimizing binding mode 3808, energy is 4272.2573, rmsd is 46.72894
sib.fastconf.EADock3: Minimizing binding mode 3809, energy is 4288.277, rmsd is 40.7677
sib.fastconf.EADock3: Minimizing binding mode 3810, energy is 4326.913, rmsd is 15.1407795
sib.fastconf.EADock3: Minimizing binding mode 3811, energy is 4625.365, rmsd is 42.858093
sib.fastconf.EADock3: Minimizing binding mode 3812, energy is 4730.552, rmsd is 15.440449
sib.fastconf.EADock3: Filter out binding modes with an energy above 3.4028235E38 (3.4028235E38 above the most favorable binding mode, which has an energy of -3.53958)
sib.wrappers.md.charmm.ExtendedCharmmWrapper: CHARMM timers: CPU time: 1471.37 seconds
sib.wrappers.md.charmm.ExtendedCharmmWrapper: CHARMM timers: Elapsed time: 1879.2 seconds.
sib.fastconf.EADock3: Starting clustering
sib.fastconf.EADock3: Clustering iteration 0 took 780 ms and merged 1494 clusters.
sib.fastconf.EADock3: Clustering iteration 1 took 430 ms and merged 64 clusters.
sib.fastconf.EADock3: Clustering iteration 2 took 420 ms and merged 5 clusters.
sib.fastconf.EADock3: Clustering iteration 3 took 430 ms and merged 0 clusters.
sib.fastconf.EADock3: Clustering took 2100 ms.
sib.fastconf.EADock3: 3813 elements were gathered in 2250 clusters.
sib.fastconf.EADock3: Evaluating cluster 0/2250
sib.fastconf.EADock3: Evaluating binding mode 0/1 with FACTS
sib.fastconf.EADock3: Evaluating cluster 1/2250
sib.fastconf.EADock3: Evaluating binding mode 0/1 with FACTS
sib.fastconf.EADock3: Evaluating cluster 2/2250
sib.fastconf.EADock3: Evaluating binding mode 0/1 with FACTS
sib.fastconf.EADock3: Evaluating cluster 3/2250
sib.fastconf.EADock3: Evaluating binding mode 0/1 with FACTS
sib.fastconf.EADock3: Evaluating cluster 4/2250
sib.fastconf.EADock3: Evaluating binding mode 0/1 with FACTS
sib.fastconf.EADock3: Evaluating cluster 5/2250
sib.fastconf.EADock3: Evaluating binding mode 0/1 with FACTS
sib.fastconf.EADock3: Evaluating cluster 6/2250
sib.fastconf.EADock3: Evaluating binding mode 0/1 with FACTS
sib.fastconf.EADock3: Evaluating cluster 7/2250
sib.fastconf.EADock3: Evaluating binding mode 0/1 with FACTS
sib.fastconf.EADock3: Evaluating cluster 8/2250
sib.fastconf.EADock3: Evaluating binding mode 0/1 with FACTS
sib.fastconf.EADock3: Evaluating cluster 9/2250
sib.fastconf.EADock3: Evaluating binding mode 0/1 with FACTS
sib.fastconf.EADock3: Evaluating cluster 10/2250
sib.fastconf.EADock3: Evaluating binding mode 0/1 with FACTS
sib.fastconf.EADock3: Evaluating cluster 11/2250
sib.fastconf.EADock3: Evaluating binding mode 0/1 with FACTS
sib.fastconf.EADock3: Evaluating cluster 12/2250
sib.fastconf.EADock3: Evaluating binding mode 0/1 with FACTS
sib.fastconf.EADock3: Evaluating cluster 13/2250
sib.fastconf.EADock3: Evaluating binding mode 0/1 with FACTS
sib.fastconf.EADock3: Evaluating cluster 14/2250
sib.fastconf.EADock3: Evaluating binding mode 0/1 with FACTS
sib.fastconf.EADock3: Evaluating cluster 15/2250
sib.fastconf.EADock3: Evaluating binding mode 0/1 with FACTS
sib.fastconf.EADock3: Evaluating cluster 16/2250
sib.fastconf.EADock3: Evaluating binding mode 0/1 with FACTS
sib.fastconf.EADock3: Evaluating cluster 17/2250
sib.fastconf.EADock3: Evaluating binding mode 0/1 with FACTS
sib.fastconf.EADock3: Evaluating cluster 18/2250
sib.fastconf.EADock3: Evaluating binding mode 0/1 with FACTS
sib.fastconf.EADock3: Evaluating cluster 19/2250
sib.fastconf.EADock3: Evaluating binding mode 0/1 with FACTS
sib.fastconf.EADock3: Evaluating cluster 20/2250
sib.fastconf.EADock3: Evaluating binding mode 0/1 with FACTS
sib.fastconf.EADock3: Evaluating cluster 21/2250
sib.fastconf.EADock3: Evaluating binding mode 0/1 with FACTS
sib.fastconf.EADock3: Evaluating cluster 22/2250
sib.fastconf.EADock3: Evaluating binding mode 0/1 with FACTS
sib.fastconf.EADock3: Evaluating cluster 23/2250
sib.fastconf.EADock3: Evaluating binding mode 0/1 with FACTS
sib.fastconf.EADock3: Evaluating cluster 24/2250
sib.fastconf.EADock3: Evaluating binding mode 0/1 with FACTS
sib.fastconf.EADock3: Evaluating cluster 25/2250
sib.fastconf.EADock3: Evaluating binding mode 0/2 with FACTS
sib.fastconf.EADock3: Evaluating binding mode 1/2 with FACTS
sib.fastconf.EADock3: Evaluating cluster 26/2250
sib.fastconf.EADock3: Evaluating binding mode 0/1 with FACTS
sib.fastconf.EADock3: Evaluating cluster 27/2250
sib.fastconf.EADock3: Evaluating binding mode 0/1 with FACTS
sib.fastconf.EADock3: Evaluating cluster 28/2250
sib.fastconf.EADock3: Evaluating binding mode 0/1 with FACTS
sib.fastconf.EADock3: Evaluating cluster 29/2250
sib.fastconf.EADock3: Evaluating binding mode 0/1 with FACTS
sib.fastconf.EADock3: Evaluating cluster 30/2250
sib.fastconf.EADock3: Evaluating binding mode 0/1 with FACTS
sib.fastconf.EADock3: Evaluating cluster 31/2250
sib.fastconf.EADock3: Evaluating binding mode 0/1 with FACTS
sib.fastconf.EADock3: Evaluating cluster 32/2250
sib.fastconf.EADock3: Evaluating binding mode 0/1 with FACTS
sib.fastconf.EADock3: Evaluating cluster 33/2250
sib.fastconf.EADock3: Evaluating binding mode 0/1 with FACTS
sib.fastconf.EADock3: Evaluating cluster 34/2250
sib.fastconf.EADock3: Evaluating binding mode 0/1 with FACTS
sib.fastconf.EADock3: Evaluating cluster 35/2250
sib.fastconf.EADock3: Evaluating binding mode 0/1 with FACTS
sib.fastconf.EADock3: Evaluating cluster 36/2250
sib.fastconf.EADock3: Evaluating binding mode 0/1 with FACTS
sib.fastconf.EADock3: Evaluating cluster 37/2250
sib.fastconf.EADock3: Evaluating binding mode 0/1 with FACTS
sib.fastconf.EADock3: Evaluating cluster 38/2250
sib.fastconf.EADock3: Evaluating binding mode 0/1 with FACTS
sib.fastconf.EADock3: Evaluating cluster 39/2250
sib.fastconf.EADock3: Evaluating binding mode 0/1 with FACTS
sib.fastconf.EADock3: Evaluating cluster 40/2250
sib.fastconf.EADock3: Evaluating binding mode 0/1 with FACTS
sib.fastconf.EADock3: Evaluating cluster 41/2250
sib.fastconf.EADock3: Evaluating binding mode 0/1 with FACTS
sib.fastconf.EADock3: Evaluating cluster 42/2250
sib.fastconf.EADock3: Evaluating binding mode 0/1 with FACTS
sib.fastconf.EADock3: Evaluating cluster 43/2250
sib.fastconf.EADock3: Evaluating binding mode 0/1 with FACTS
sib.fastconf.EADock3: Evaluating cluster 44/2250
sib.fastconf.EADock3: Evaluating binding mode 0/1 with FACTS
sib.fastconf.EADock3: Evaluating cluster 45/2250
sib.fastconf.EADock3: Evaluating binding mode 0/1 with FACTS
sib.fastconf.EADock3: Evaluating cluster 46/2250
sib.fastconf.EADock3: Evaluating binding mode 0/1 with FACTS
sib.fastconf.EADock3: Evaluating cluster 47/2250
sib.fastconf.EADock3: Evaluating binding mode 0/1 with FACTS
sib.fastconf.EADock3: Evaluating cluster 48/2250
sib.fastconf.EADock3: Evaluating binding mode 0/1 with FACTS
sib.fastconf.EADock3: Evaluating cluster 49/2250
sib.fastconf.EADock3: Evaluating binding mode 0/1 with FACTS
sib.fastconf.EADock3: Evaluating cluster 50/2250
sib.fastconf.EADock3: Evaluating binding mode 0/1 with FACTS
sib.fastconf.EADock3: Evaluating cluster 51/2250
sib.fastconf.EADock3: Evaluating binding mode 0/1 with FACTS
sib.fastconf.EADock3: Evaluating cluster 52/2250
sib.fastconf.EADock3: Evaluating binding mode 0/1 with FACTS
sib.fastconf.EADock3: Evaluating cluster 53/2250
sib.fastconf.EADock3: Evaluating binding mode 0/1 with FACTS
sib.fastconf.EADock3: Evaluating cluster 54/2250
sib.fastconf.EADock3: Evaluating binding mode 0/1 with FACTS
sib.fastconf.EADock3: Evaluating cluster 55/2250
sib.fastconf.EADock3: Evaluating binding mode 0/1 with FACTS
sib.fastconf.EADock3: Evaluating cluster 56/2250
sib.fastconf.EADock3: Evaluating binding mode 0/1 with FACTS
sib.fastconf.EADock3: Evaluating cluster 57/2250
sib.fastconf.EADock3: Evaluating binding mode 0/1 with FACTS
sib.fastconf.EADock3: Evaluating cluster 58/2250
sib.fastconf.EADock3: Evaluating binding mode 0/1 with FACTS
sib.fastconf.EADock3: Evaluating cluster 59/2250
sib.fastconf.EADock3: Evaluating binding mode 0/1 with FACTS
sib.fastconf.EADock3: Evaluating cluster 60/2250
sib.fastconf.EADock3: Evaluating binding mode 0/1 with FACTS
sib.fastconf.EADock3: Evaluating cluster 61/2250
sib.fastconf.EADock3: Evaluating binding mode 0/1 with FACTS
sib.fastconf.EADock3: Evaluating cluster 62/2250
sib.fastconf.EADock3: Evaluating binding mode 0/1 with FACTS
sib.fastconf.EADock3: Evaluating cluster 63/2250
sib.fastconf.EADock3: Evaluating binding mode 0/1 with FACTS
sib.fastconf.EADock3: Evaluating cluster 64/2250
sib.fastconf.EADock3: Evaluating binding mode 0/1 with FACTS
sib.fastconf.EADock3: Evaluating cluster 65/2250
sib.fastconf.EADock3: Evaluating binding mode 0/1 with FACTS
sib.fastconf.EADock3: Evaluating cluster 66/2250
sib.fastconf.EADock3: Evaluating binding mode 0/2 with FACTS
sib.fastconf.EADock3: Evaluating binding mode 1/2 with FACTS
sib.fastconf.EADock3: Evaluating cluster 67/2250
sib.fastconf.EADock3: Evaluating binding mode 0/1 with FACTS
sib.fastconf.EADock3: Evaluating cluster 68/2250
sib.fastconf.EADock3: Evaluating binding mode 0/1 with FACTS
sib.fastconf.EADock3: Evaluating cluster 69/2250
sib.fastconf.EADock3: Evaluating binding mode 0/1 with FACTS
sib.fastconf.EADock3: Evaluating cluster 70/2250
sib.fastconf.EADock3: Evaluating binding mode 0/1 with FACTS
sib.fastconf.EADock3: Evaluating cluster 71/2250
sib.fastconf.EADock3: Evaluating binding mode 0/1 with FACTS
sib.fastconf.EADock3: Evaluating cluster 72/2250
sib.fastconf.EADock3: Evaluating binding mode 0/1 with FACTS
sib.fastconf.EADock3: Evaluating cluster 73/2250
sib.fastconf.EADock3: Evaluating binding mode 0/1 with FACTS
sib.fastconf.EADock3: Evaluating cluster 74/2250
sib.fastconf.EADock3: Evaluating binding mode 0/1 with FACTS
sib.fastconf.EADock3: Evaluating cluster 75/2250
sib.fastconf.EADock3: Evaluating binding mode 0/1 with FACTS
sib.fastconf.EADock3: Evaluating cluster 76/2250
sib.fastconf.EADock3: Evaluating binding mode 0/1 with FACTS
sib.fastconf.EADock3: Evaluating cluster 77/2250
sib.fastconf.EADock3: Evaluating binding mode 0/1 with FACTS
sib.fastconf.EADock3: Evaluating cluster 78/2250
sib.fastconf.EADock3: Evaluating binding mode 0/1 with FACTS
sib.fastconf.EADock3: Evaluating cluster 79/2250
sib.fastconf.EADock3: Evaluating binding mode 0/1 with FACTS
sib.fastconf.EADock3: Evaluating cluster 80/2250
sib.fastconf.EADock3: Evaluating binding mode 0/1 with FACTS
sib.fastconf.EADock3: Evaluating cluster 81/2250
sib.fastconf.EADock3: Evaluating binding mode 0/1 with FACTS
sib.fastconf.EADock3: Evaluating cluster 82/2250
sib.fastconf.EADock3: Evaluating binding mode 0/1 with FACTS
sib.fastconf.EADock3: Evaluating cluster 83/2250
sib.fastconf.EADock3: Evaluating binding mode 0/1 with FACTS
sib.fastconf.EADock3: Evaluating cluster 84/2250
sib.fastconf.EADock3: Evaluating binding mode 0/1 with FACTS
sib.fastconf.EADock3: Evaluating cluster 85/2250
sib.fastconf.EADock3: Evaluating binding mode 0/1 with FACTS
sib.fastconf.EADock3: Evaluating cluster 86/2250
sib.fastconf.EADock3: Evaluating binding mode 0/1 with FACTS
sib.fastconf.EADock3: Evaluating cluster 87/2250
sib.fastconf.EADock3: Evaluating binding mode 0/1 with FACTS
sib.fastconf.EADock3: Evaluating cluster 88/2250
sib.fastconf.EADock3: Evaluating binding mode 0/1 with FACTS
sib.fastconf.EADock3: Evaluating cluster 89/2250
sib.fastconf.EADock3: Evaluating binding mode 0/1 with FACTS
sib.fastconf.EADock3: Evaluating cluster 90/2250
sib.fastconf.EADock3: Evaluating binding mode 0/1 with FACTS
sib.fastconf.EADock3: Evaluating cluster 91/2250
sib.fastconf.EADock3: Evaluating binding mode 0/1 with FACTS
sib.fastconf.EADock3: Evaluating cluster 92/2250
sib.fastconf.EADock3: Evaluating binding mode 0/1 with FACTS
sib.fastconf.EADock3: Evaluating cluster 93/2250
sib.fastconf.EADock3: Evaluating binding mode 0/1 with FACTS
sib.fastconf.EADock3: Evaluating cluster 94/2250
sib.fastconf.EADock3: Evaluating binding mode 0/1 with FACTS
sib.fastconf.EADock3: Evaluating cluster 95/2250
sib.fastconf.EADock3: Evaluating binding mode 0/1 with FACTS
sib.fastconf.EADock3: Evaluating cluster 96/2250
sib.fastconf.EADock3: Evaluating binding mode 0/1 with FACTS
sib.fastconf.EADock3: Evaluating cluster 97/2250
sib.fastconf.EADock3: Evaluating binding mode 0/1 with FACTS
sib.fastconf.EADock3: Evaluating cluster 98/2250
sib.fastconf.EADock3: Evaluating binding mode 0/1 with FACTS
sib.fastconf.EADock3: Evaluating cluster 99/2250
sib.fastconf.EADock3: Evaluating binding mode 0/1 with FACTS
sib.fastconf.EADock3: Evaluating cluster 100/2250
sib.fastconf.EADock3: Evaluating binding mode 0/1 with FACTS
sib.fastconf.EADock3: Evaluating cluster 101/2250
sib.fastconf.EADock3: Evaluating binding mode 0/1 with FACTS
sib.fastconf.EADock3: Evaluating cluster 102/2250
sib.fastconf.EADock3: Evaluating binding mode 0/1 with FACTS
sib.fastconf.EADock3: Evaluating cluster 103/2250
sib.fastconf.EADock3: Evaluating binding mode 0/1 with FACTS
sib.fastconf.EADock3: Evaluating cluster 104/2250
sib.fastconf.EADock3: Evaluating binding mode 0/1 with FACTS
sib.fastconf.EADock3: Evaluating cluster 105/2250
sib.fastconf.EADock3: Evaluating binding mode 0/1 with FACTS
sib.fastconf.EADock3: Evaluating cluster 106/2250
sib.fastconf.EADock3: Evaluating binding mode 0/1 with FACTS
sib.fastconf.EADock3: Evaluating cluster 107/2250
sib.fastconf.EADock3: Evaluating binding mode 0/1 with FACTS
sib.fastconf.EADock3: Evaluating cluster 108/2250
sib.fastconf.EADock3: Evaluating binding mode 0/1 with FACTS
sib.fastconf.EADock3: Evaluating cluster 109/2250
sib.fastconf.EADock3: Evaluating binding mode 0/1 with FACTS
sib.fastconf.EADock3: Evaluating cluster 110/2250
sib.fastconf.EADock3: Evaluating binding mode 0/1 with FACTS
sib.fastconf.EADock3: Evaluating cluster 111/2250
sib.fastconf.EADock3: Evaluating binding mode 0/1 with FACTS
sib.fastconf.EADock3: Evaluating cluster 112/2250
[truncated: 370,549 more chars]
