# Supplementary material for: Genetic Uniformity of a Specific Region in SARS-CoV-2 Genome and In-Silico Target-Oriented Repurposing of N-Acetyl-D-Glucosamine
Source: Preprints.org preprint supplement (doi:10.20944/preprints202005.0397.v1), 2020-05-24
Supplement: Supplementary file 7 [file supplementary › S6 File/ligand.par]

* ---- 
* Built parameters for tmpA9wPEP.mol2 
*    by user swissdock     Wed May  6 14:16:18 CEST 2020 
* ---- 
*

BONDS
CR   C=O   301.539     1.4920 
CR   HCMM  342.991     1.0930 
C=O  O=C   931.963     1.2220 
C=O  NC=O  419.491     1.3690 
NC=O CR    335.651     1.4360 
NC=O HNCO  479.511     1.0150 
CR   CR    306.432     1.5080 
C=O  HCMM  334.643     1.1010 
CR   OR    363.214     1.4180 
OR   HOR   560.905     0.9720 

ANGLES
C=O  CR   HCMM   46.778    108.3850 
HCMM CR   HCMM   37.134    108.8360 
CR   C=O  O=C    67.504    124.4100 
CR   C=O  NC=O   70.814    112.7350 
O=C  C=O  NC=O   65.273    127.1520 
C=O  NC=O CR     59.084    119.6000 
C=O  NC=O HNCO   41.380    120.2770 
CR   NC=O HNCO   39.725    120.0660 
NC=O CR   C=O    45.626    102.6550 
NC=O CR   CR     75.564    109.9600 
NC=O CR   HCMM   53.255    107.6460 
C=O  CR   CR     55.917    107.5170 
CR   CR   HCMM   45.770    110.5490 
CR   C=O  HCMM   58.148    117.2800 
O=C  C=O  HCMM   48.217    123.4390 
CR   CR   CR     61.243    109.6080 
CR   CR   OR     71.390    108.1330 
OR   CR   HCMM   56.205    108.5770 
CR   OR   HOR    57.069    106.5030 

DIHEDRALS
CR   C=O  NC=O CR       0.324  1     0.00 
CR   C=O  NC=O CR       3.079  2   180.00 
CR   C=O  NC=O CR       0.254  3     0.00 
CR   C=O  NC=O HNCO    -0.147  1     0.00 
CR   C=O  NC=O HNCO     2.902  2   180.00 
CR   C=O  NC=O HNCO     0.671  3     0.00 
C=O  NC=O CR   C=O      1.550  1     0.00 
C=O  NC=O CR   C=O     -1.264  2   180.00 
C=O  NC=O CR   C=O      0.747  3     0.00 
C=O  NC=O CR   CR      -0.513  1     0.00 
C=O  NC=O CR   CR       0.347  2   180.00 
C=O  NC=O CR   CR       0.474  3     0.00 
C=O  NC=O CR   HCMM    -1.050  1     0.00 
C=O  NC=O CR   HCMM     0.681  2   180.00 
C=O  NC=O CR   HCMM     0.011  3     0.00 
O=C  C=O  CR   HCMM     0.330  1     0.00 
O=C  C=O  CR   HCMM    -0.704  2   180.00 
O=C  C=O  CR   HCMM     0.154  3     0.00 
O=C  C=O  NC=O CR      -0.160  1     0.00 
O=C  C=O  NC=O CR       3.147  2   180.00 
O=C  C=O  NC=O CR      -0.073  3     0.00 
O=C  C=O  NC=O HNCO     0.718  1     0.00 
O=C  C=O  NC=O HNCO     2.487  2   180.00 
O=C  C=O  NC=O HNCO    -0.227  3     0.00 
NC=O C=O  CR   HCMM    -0.206  1     0.00 
NC=O C=O  CR   HCMM     0.346  2   180.00 
NC=O C=O  CR   HCMM     0.043  3     0.00 
NC=O CR   C=O  O=C      0.169  1     0.00 
NC=O CR   C=O  O=C      1.386  2   180.00 
NC=O CR   C=O  O=C      1.073  3     0.00 
NC=O CR   C=O  HCMM     0.100  2   180.00 
NC=O CR   C=O  HCMM     0.350  3     0.00 
NC=O CR   CR   CR       0.150  3     0.00 
NC=O CR   CR   OR       0.150  3     0.00 
NC=O CR   CR   HCMM     0.213  3     0.00 
CR   CR   CR   CR       0.051  1     0.00 
CR   CR   CR   CR       0.341  2   180.00 
CR   CR   CR   CR       0.166  3     0.00 
CR   CR   CR   OR      -0.344  1     0.00 
CR   CR   CR   OR       0.879  2   180.00 
CR   CR   CR   OR       0.238  3     0.00 
CR   CR   CR   HCMM     0.320  1     0.00 
CR   CR   CR   HCMM    -0.315  2   180.00 
CR   CR   CR   HCMM     0.132  3     0.00 
CR   CR   OR   HOR      0.135  2   180.00 
CR   CR   OR   HOR      0.118  3     0.00 
C=O  CR   NC=O HNCO     0.040  1     0.00 
C=O  CR   NC=O HNCO     0.140  2   180.00 
C=O  CR   NC=O HNCO     0.201  3     0.00 
C=O  CR   CR   CR       0.033  1     0.00 
C=O  CR   CR   CR      -0.078  2   180.00 
C=O  CR   CR   CR       0.071  3     0.00 
C=O  CR   CR   OR      -0.340  1     0.00 
C=O  CR   CR   OR      -0.015  2   180.00 
C=O  CR   CR   HCMM    -0.128  1     0.00 
C=O  CR   CR   HCMM     0.029  2   180.00 
O=C  C=O  CR   CR       0.412  1     0.00 
O=C  C=O  CR   CR       0.070  2   180.00 
O=C  C=O  CR   CR       0.163  3     0.00 
CR   CR   NC=O HNCO     0.276  1     0.00 
CR   CR   NC=O HNCO    -0.190  2   180.00 
CR   CR   NC=O HNCO     0.163  3     0.00 
CR   CR   C=O  HCMM    -0.036  1     0.00 
CR   CR   C=O  HCMM     0.158  2   180.00 
CR   CR   C=O  HCMM     0.337  3     0.00 
OR   CR   CR   OR       0.204  1     0.00 
OR   CR   CR   OR       0.699  2   180.00 
OR   CR   CR   OR       0.480  3     0.00 
OR   CR   CR   HCMM    -0.327  1     0.00 
OR   CR   CR   HCMM     0.536  2   180.00 
OR   CR   CR   HCMM     0.140  3     0.00 
HNCO NC=O CR   HCMM    -0.308  1     0.00 
HNCO NC=O CR   HCMM     0.137  3     0.00 
HCMM CR   C=O  HCMM    -0.411  1     0.00 
HCMM CR   C=O  HCMM     0.251  2   180.00 
HCMM CR   C=O  HCMM     0.504  3     0.00 
HCMM CR   CR   HCMM     0.142  1     0.00 
HCMM CR   CR   HCMM    -0.693  2   180.00 
HCMM CR   CR   HCMM     0.157  3     0.00 
HCMM CR   OR   HOR      0.298  1     0.00 
HCMM CR   OR   HOR     -0.138  2   180.00 
HCMM CR   OR   HOR      0.173  3     0.00 

IMPROPER
CR   HCMM C=O  HCMM     0.000  0     0.00 
C=O  NC=O CR   O=C      9.284  0     0.00 
NC=O CR   C=O  HNCO    -1.439  0     0.00 
CR   CR   NC=O C=O      0.000  0     0.00 
CR   C=O  NC=O HCMM     0.000  0     0.00 
C=O  O=C  CR   HCMM     8.780  0     0.00 
CR   CR   CR   OR       0.000  0     0.00 
CR   CR   CR   HCMM     0.000  0     0.00 
CR   OR   CR   HCMM     0.000  0     0.00 

NONBONDED nbxmod  5 atom cdiel shift vatom vdistance vswitch - 
cutnb 14.0 ctofnb 12.0 ctonnb 10.0 eps 1.0 e14fac 1.0 wmin 1.5 
CR      0.000000  -0.055000     2.175000   0.000000  -0.010000     1.900000    
C=O     0.000000  -0.110000     2.000000    
O=C     0.000000  -0.120000     1.700000   0.000000  -0.120000     1.400000    
NC=O    0.000000  -0.200000     1.850000    
OR      0.000000  -0.152100     1.770000    
HCMM    0.000000  -0.022000     1.320000    
HNCO    0.000000  -0.046000     0.224500    
HOR     0.000000  -0.046000     0.224500    
