# Supplementary material for: Genetic Uniformity of a Specific Region in SARS-CoV-2 Genome and In-Silico Target-Oriented Repurposing of N-Acetyl-D-Glucosamine
Source: Preprints.org preprint supplement (doi:10.20944/preprints202005.0397.v1), 2020-05-24
Supplement: Supplementary file 7 [file supplementary › S6 File/ligand.rtf]

* ---- 
* Built RTF for tmpA9wPEP.mol2 
*    by user swissdock     Wed May  6 14:16:18 CEST 2020 
* ---- 
*
   22    0

MASS   201 CR    12.011000
MASS   202 C=O   12.011000
MASS   203 O=C   15.999400
MASS   204 NC=O  14.006700
MASS   205 OR    15.999400
MASS   206 HCMM   1.007940
MASS   207 HNCO   1.007940
MASS   208 HOR    1.007940

AUTOGENERATE ANGLES DIHE
DEFA FIRS NONE LAST NONE

RESI LIG  -0.000 
GROUP
ATOM C    CR    0.0610
ATOM C1   C=O   0.5690
ATOM O    O=C  -0.5700
ATOM N    NC=O -0.7301
ATOM C2   CR    0.3611
ATOM C3   C=O   0.4490
ATOM O1   O=C  -0.5700
ATOM C4   CR    0.2800
ATOM C5   CR    0.2800
ATOM C6   CR    0.2800
ATOM C7   CR    0.2800
ATOM O2   OR   -0.6800
ATOM O3   OR   -0.6800
ATOM O4   OR   -0.6800
ATOM O5   OR   -0.6800
ATOM H    HCMM  0.0000
ATOM H1   HCMM  0.0000
ATOM H2   HCMM  0.0000
ATOM H3   HNCO  0.3700
ATOM H4   HCMM  0.0000
ATOM H5   HCMM  0.0600
ATOM H6   HCMM  0.0000
ATOM H7   HCMM  0.0000
ATOM H8   HCMM  0.0000
ATOM H9   HCMM  0.0000
ATOM H10  HCMM  0.0000
ATOM H11  HOR   0.4000
ATOM H12  HOR   0.4000
ATOM H13  HOR   0.4000
ATOM H14  HOR   0.4000
BOND C    C1  
BOND C    H   
BOND C    H1  
BOND C    H2  
BOND C1   O   
BOND C1   N   
BOND N    C2  
BOND N    H3  
BOND C2   C3  
BOND C2   C4  
BOND C2   H4  
BOND C3   O1  
BOND C3   H5  
BOND C4   C5  
BOND C4   O5  
BOND C4   H6  
BOND C5   C6  
BOND C5   O4  
BOND C5   H7  
BOND C6   C7  
BOND C6   O3  
BOND C6   H8  
BOND C7   O2  
BOND C7   H9  
BOND C7   H10 
BOND O2   H11 
BOND O3   H12 
BOND O4   H13 
BOND O5   H14 
IMPH C    H    C1   H1   
IMPH C    H    C1   H2   
IMPH C1   N    C    O    
IMPH N    C2   C1   H3   
IMPH C2   C4   N    C3   
IMPH C2   C3   N    H4   
IMPH C3   O1   C2   H5   
IMPH C4   C5   C2   O5   
IMPH C4   C5   C2   H6   
IMPH C5   C6   C4   O4   
IMPH C5   C6   C4   H7   
IMPH C6   C7   C5   O3   
IMPH C6   C7   C5   H8   
IMPH C7   O2   C6   H9   
IMPH C7   O2   C6   H10  
IC C    C1    N    C2    1.51   119.96  179.98  119.97  1.46  
IC C    C1    N    H3    1.51   119.96    0.03  119.98  0.97  
IC C1   N     C2   C3    1.35   119.97   85.05  109.45  1.51  
IC C1   N     C2   C4    1.35   119.97 -155.00  109.49  1.53  
IC C1   N     C2   H4    1.35   119.97  -34.95  109.49  1.09  
IC O    C1    C    H     1.21   120.06    0.03  109.41  1.09  
IC O    C1    C    H1    1.21   120.06  120.00  109.47  1.09  
IC O    C1    C    H2    1.21   120.06 -120.01  109.46  1.09  
IC O    C1    N    C2    1.21   119.98   -0.03  119.97  1.46  
IC O    C1    N    H3    1.21   119.98 -179.98  119.98  0.97  
IC N    C1    C    H     1.35   119.96 -179.98  109.41  1.09  
IC N    C1    C    H1    1.35   119.96  -60.01  109.47  1.09  
IC N    C1    C    H2    1.35   119.96   59.97  109.46  1.09  
IC N    C2    C3   O1    1.46   109.45   -0.05  120.02  1.21  
IC N    C2    C3   H5    1.46   109.45 -179.97  120.01  1.08  
IC N    C2    C4   C5    1.46   109.49  175.05  109.51  1.53  
IC N    C2    C4   O5    1.46   109.49  -64.95  109.44  1.43  
IC N    C2    C4   H6    1.46   109.49   55.01  109.45  1.09  
IC C2   C4    C5   C6    1.53   109.51 -180.00  109.49  1.53  
IC C2   C4    C5   O4    1.53   109.51  -59.99  109.43  1.43  
IC C2   C4    C5   H7    1.53   109.51   59.96  109.46  1.09  
IC C2   C4    O5   H14   1.53   109.44  -60.09  106.77  0.97  
IC C3   C2    N    H3    1.51   109.45  -95.01  120.05  0.97  
IC C3   C2    C4   C5    1.51   109.44  -64.98  109.51  1.53  
IC C3   C2    C4   O5    1.51   109.44   55.02  109.44  1.43  
IC C3   C2    C4   H6    1.51   109.44  174.97  109.45  1.09  
IC O1   C3    C2   C4    1.21   120.02 -120.04  109.44  1.53  
IC O1   C3    C2   H4    1.21   120.02  119.96  109.46  1.09  
IC C4   C2    N    H3    1.53   109.49   24.95  120.05  0.97  
IC C4   C2    C3   H5    1.53   109.44   60.04  120.01  1.08  
IC C4   C5    C6   C7    1.53   109.49  179.97  109.48  1.53  
IC C4   C5    C6   O3    1.53   109.49  -60.03  109.49  1.43  
IC C4   C5    C6   H8    1.53   109.49   60.03  109.48  1.09  
IC C4   C5    O4   H13   1.53   109.43  -60.02  106.76  0.97  
IC C5   C4    C2   H4    1.53   109.51   55.00  109.49  1.09  
IC C5   C4    O5   H14   1.53   109.47   59.94  106.77  0.97  
IC C5   C6    C7   O2    1.53   109.48 -174.98  109.47  1.43  
IC C5   C6    C7   H9    1.53   109.48  -55.02  109.51  1.09  
IC C5   C6    C7   H10   1.53   109.48   64.98  109.51  1.09  
IC C5   C6    O3   H12   1.53   109.49  -59.99  106.76  0.97  
IC C6   C5    C4   O5    1.53   109.49   60.02  109.47  1.43  
IC C6   C5    C4   H6    1.53   109.49  -59.99  109.50  1.09  
IC C6   C5    O4   H13   1.53   109.48   59.99  106.76  0.97  
IC C6   C7    O2   H11   1.53   109.47  179.99  106.80  0.97  
IC C7   C6    C5   O4    1.53   109.48   59.99  109.48  1.43  
IC C7   C6    C5   H7    1.53   109.48  -60.01  109.50  1.09  
IC C7   C6    O3   H12   1.53   109.47   60.02  106.76  0.97  
IC O2   C7    C6   O3    1.43   109.47   65.00  109.47  1.43  
IC O2   C7    C6   H8    1.43   109.47  -55.00  109.41  1.09  
IC O3   C6    C5   O4    1.43   109.49  180.00  109.48  1.43  
IC O3   C6    C5   H7    1.43   109.49   59.99  109.50  1.09  
IC O3   C6    C7   H9    1.43   109.47 -175.04  109.51  1.09  
IC O3   C6    C7   H10   1.43   109.47  -55.04  109.51  1.09  
IC O4   C5    C4   O5    1.43   109.43 -179.98  109.47  1.43  
IC O4   C5    C4   H6    1.43   109.43   60.02  109.50  1.09  
IC O4   C5    C6   H8    1.43   109.48  -59.95  109.48  1.09  
IC O5   C4    C2   H4    1.43   109.44  175.00  109.49  1.09  
IC O5   C4    C5   H7    1.43   109.47  -60.03  109.46  1.09  
IC H3   N     C2   H4    0.97   120.05  145.00  109.49  1.09  
IC H4   C2    C3   H5    1.09   109.46  -59.96  120.01  1.08  
IC H4   C2    C4   H6    1.09   109.49  -65.04  109.45  1.09  
IC H6   C4    C5   H7    1.09   109.50  179.97  109.46  1.09  
IC H6   C4    O5   H14   1.09   109.46  179.96  106.77  0.97  
IC H7   C5    C6   H8    1.09   109.50 -179.95  109.48  1.09  
IC H7   C5    O4   H13   1.09   109.45 -179.97  106.76  0.97  
IC H8   C6    C7   H9    1.09   109.41   64.96  109.51  1.09  
IC H8   C6    C7   H10   1.09   109.41 -175.03  109.51  1.09  
IC H8   C6    O3   H12   1.09   109.50  179.96  106.76  0.97  
IC H9   C7    O2   H11   1.09   109.42   59.98  106.80  0.97  
IC H10  C7    O2   H11   1.09   109.48  -59.96  106.80  0.97  
IC H    C1   *C    H1    0.00     0.00  120.00    0.00  0.00  
IC H    C1   *C    H2    0.00     0.00 -120.00    0.00  0.00  
IC N    C    *C1   O     0.00     0.00  180.00    0.00  0.00  
IC C2   C1   *N    H3    0.00     0.00  180.00    0.00  0.00  
IC C4   N    *C2   C3    0.00     0.00  120.00    0.00  0.00  
IC C3   N    *C2   H4    0.00     0.00 -120.00    0.00  0.00  
IC O1   C2   *C3   H5    0.00     0.00  180.00    0.00  0.00  
IC C5   C2   *C4   O5    0.00     0.00  120.00    0.00  0.00  
IC C5   C2   *C4   H6    0.00     0.00 -120.00    0.00  0.00  
IC C6   C4   *C5   O4    0.00     0.00  120.00    0.00  0.00  
IC C6   C4   *C5   H7    0.00     0.00 -120.00    0.00  0.00  
IC C7   C5   *C6   O3    0.00     0.00  120.00    0.00  0.00  
IC C7   C5   *C6   H8    0.00     0.00 -120.00    0.00  0.00  
IC O2   C6   *C7   H9    0.00     0.00  120.00    0.00  0.00  
IC O2   C6   *C7   H10   0.00     0.00 -120.00    0.00  0.00  

END
