# Supplementary material for: Genetic Uniformity of a Specific Region in SARS-CoV-2 Genome and In-Silico Target-Oriented Repurposing of N-Acetyl-D-Glucosamine
Source: Preprints.org preprint supplement (doi:10.20944/preprints202005.0397.v1), 2020-05-24
Supplement: Supplementary file 7 [file supplementary › S6 File/params]

JOBNAME: trial
EMAIL: omuerbaysal@gmail.com
PASSIVEFLEXIBILITYDISTANCE: 0.0
WANTEDCONFS: 5000
NBFACTSEVAL: 5000
NBSEEDS: 250
SDSTEPS: 100
ABNRSTEPS: 250
CLUSTERINGRADIUS: 2.0
MAXCLUSTERSIZE: 8
