# Supplementary material for: Genetic Uniformity of a Specific Region in SARS-CoV-2 Genome and In-Silico Target-Oriented Repurposing of N-Acetyl-D-Glucosamine
Source: Preprints.org preprint supplement (doi:10.20944/preprints202005.0397.v1), 2020-05-24
Supplement: Supplementary file 7 [file supplementary › S6 File/target.crd]

* PYCHARMM CRD
*  DATE:     5/ 6/20     14:17:52      CREATED BY USER: root
*
 9550
    1    1 SER  N    -31.41252  49.44535   2.48945 1S   19     1.00000
    2    1 SER  HT1  -32.11928  48.93994   1.91826 1S   19     0.00000
    3    1 SER  HT2  -31.69091  49.41342   3.49126 1S   19     0.00000
    4    1 SER  HT3  -30.47840  48.99390   2.37690 1S   19     0.00000
    5    1 SER  CA   -31.32851  50.86731   2.05019 1S   19     1.00000
    6    1 SER  HA   -32.31376  51.28530   2.20842 1S   19     0.00000
    7    1 SER  CB   -30.26244  51.65009   2.87107 1S   19     1.00000
    8    1 SER  HB1  -29.44494  52.04529   2.23148 1S   19     0.00000
    9    1 SER  HB2  -29.79695  50.99749   3.64044 1S   19     0.00000
   10    1 SER  OG   -30.86436  52.75419   3.53485 1S   19     1.00000
   11    1 SER  HG1  -30.15831  53.20962   4.00157 1S   19     0.00000
   12    1 SER  C    -31.03179  50.95862   0.58329 1S   19     1.00000
   13    1 SER  O    -31.85676  51.44894  -0.18346 1S   19     1.00000
   14    2 THR  N    -29.84148  50.47073   0.14996 1S   20     1.00000
   15    2 THR  HN   -29.18324  50.06288   0.78383 1S   20     0.00000
   16    2 THR  CA   -29.40779  50.52074  -1.23192 1S   20     1.00000
   17    2 THR  HA   -29.63837  51.50967  -1.60481 1S   20     0.00000
   18    2 THR  CB   -27.89945  50.28828  -1.41354 1S   20     1.00000
   19    2 THR  HB   -27.58972  50.66844  -2.41239 1S   20     0.00000
   20    2 THR  OG1  -27.52807  48.91661  -1.33889 1S   20     1.00000
   21    2 THR  HG1  -26.56875  48.90264  -1.29756 1S   20     0.00000
   22    2 THR  CG2  -27.11260  51.03925  -0.32321 1S   20     1.00000
   23    2 THR  HG21 -27.28719  50.59208   0.67793 1S   20     0.00000
   24    2 THR  HG22 -27.40378  52.10889  -0.29174 1S   20     0.00000
   25    2 THR  HG23 -26.02275  50.97549  -0.53077 1S   20     0.00000
   26    2 THR  C    -30.19137  49.50796  -2.03800 1S   20     1.00000
   27    2 THR  O    -30.85750  48.64415  -1.47569 1S   20     1.00000
   28    3 ILE  N    -30.08979  49.56370  -3.38312 1S   21     1.00000
   29    3 ILE  HN   -29.54817  50.26931  -3.83287 1S   21     0.00000
   30    3 ILE  CA   -30.74135  48.62110  -4.27061 1S   21     1.00000
   31    3 ILE  HA   -31.77021  48.52426  -3.95320 1S   21     0.00000
   32    3 ILE  CB   -30.71224  49.12155  -5.71245 1S   21     1.00000
   33    3 ILE  HB   -29.69401  49.52797  -5.91757 1S   21     0.00000
   34    3 ILE  CG2  -30.96835  47.98934  -6.73528 1S   21     1.00000
   35    3 ILE  HG21 -31.90027  47.43768  -6.48982 1S   21     0.00000
   36    3 ILE  HG22 -30.12451  47.26887  -6.75736 1S   21     0.00000
   37    3 ILE  HG23 -31.06195  48.42262  -7.75159 1S   21     0.00000
   38    3 ILE  CG1  -31.72348  50.28726  -5.87898 1S   21     1.00000
   39    3 ILE  HG11 -31.44216  50.87505  -6.78105 1S   21     0.00000
   40    3 ILE  HG12 -31.64592  50.96943  -5.00472 1S   21     0.00000
   41    3 ILE  CD   -33.18417  49.83885  -6.03320 1S   21     1.00000
   42    3 ILE  HD1  -33.47441  49.12907  -5.23045 1S   21     0.00000
   43    3 ILE  HD2  -33.33819  49.34298  -7.01526 1S   21     0.00000
   44    3 ILE  HD3  -33.86245  50.71695  -5.98537 1S   21     0.00000
   45    3 ILE  C    -30.11217  47.25234  -4.13660 1S   21     1.00000
   46    3 ILE  O    -30.81600  46.24391  -4.16075 1S   21     1.00000
   47    4 GLU  N    -28.77225  47.18522  -3.94845 1S   22     1.00000
   48    4 GLU  HN   -28.21428  48.01027  -3.91503 1S   22     0.00000
   49    4 GLU  CA   -28.05791  45.93875  -3.78937 1S   22     1.00000
   50    4 GLU  HA   -28.34264  45.30573  -4.61258 1S   22     0.00000
   51    4 GLU  CB   -26.52229  46.12553  -3.82209 1S   22     1.00000
   52    4 GLU  HB1  -26.22012  46.85986  -3.04425 1S   22     0.00000
   53    4 GLU  HB2  -26.25693  46.55377  -4.81516 1S   22     0.00000
   54    4 GLU  CG   -25.73865  44.81150  -3.61770 1S   22     1.00000
   55    4 GLU  HG1  -26.09074  44.04699  -4.34183 1S   22     0.00000
   56    4 GLU  HG2  -25.91862  44.43036  -2.59015 1S   22     0.00000
   57    4 GLU  CD   -24.23875  45.01846  -3.80667 1S   22     1.00000
   58    4 GLU  OE1  -23.83716  45.51034  -4.89440 1S   22     1.00000
   59    4 GLU  OE2  -23.47310  44.66439  -2.86971 1S   22     1.00000
   60    4 GLU  C    -28.45236  45.21733  -2.52674 1S   22     1.00000
   61    4 GLU  O    -28.66537  44.00841  -2.55179 1S   22     1.00000
   62    5 GLU  N    -28.59688  45.94289  -1.39489 1S   23     1.00000
   63    5 GLU  HN   -28.43272  46.92817  -1.38813 1S   23     0.00000
   64    5 GLU  CA   -28.96455  45.36184  -0.12093 1S   23     1.00000
   65    5 GLU  HA   -28.27465  44.55590   0.08689 1S   23     0.00000
   66    5 GLU  CB   -28.89243  46.38945   1.02736 1S   23     1.00000
   67    5 GLU  HB1  -29.25152  45.92267   1.97285 1S   23     0.00000
   68    5 GLU  HB2  -29.56456  47.24215   0.78246 1S   23     0.00000
   69    5 GLU  CG   -27.46233  46.90587   1.26911 1S   23     1.00000
   70    5 GLU  HG1  -27.02548  47.29843   0.33291 1S   23     0.00000
   71    5 GLU  HG2  -26.81296  46.07376   1.61326 1S   23     0.00000
   72    5 GLU  CD   -27.46473  48.02176   2.31162 1S   23     1.00000
   73    5 GLU  OE1  -26.56013  48.00561   3.18654 1S   23     1.00000
   74    5 GLU  OE2  -28.36336  48.90487   2.24560 1S   23     1.00000
   75    5 GLU  C    -30.35844  44.78575  -0.14892 1S   23     1.00000
   76    5 GLU  O    -30.62047  43.77113   0.48858 1S   23     1.00000
   77    6 GLN  N    -31.27849  45.40229  -0.92294 1S   24     1.00000
   78    6 GLN  HN   -31.04980  46.22408  -1.44078 1S   24     0.00000
   79    6 GLN  CA   -32.63462  44.92846  -1.06674 1S   24     1.00000
   80    6 GLN  HA   -33.00896  44.65153  -0.09043 1S   24     0.00000
   81    6 GLN  CB   -33.55083  46.00469  -1.67099 1S   24     1.00000
   82    6 GLN  HB1  -34.57752  45.58648  -1.78215 1S   24     0.00000
   83    6 GLN  HB2  -33.16519  46.27334  -2.68142 1S   24     0.00000
   84    6 GLN  CG   -33.67133  47.26739  -0.80788 1S   24     1.00000
   85    6 GLN  HG1  -32.67666  47.57072  -0.42878 1S   24     0.00000
   86    6 GLN  HG2  -34.32412  47.06691   0.06673 1S   24     0.00000
   87    6 GLN  CD   -34.28304  48.38543  -1.65721 1S   24     1.00000
   88    6 GLN  OE1  -35.23015  48.16333  -2.41769 1S   24     1.00000
   89    6 GLN  NE2  -33.72058  49.62160  -1.52676 1S   24     1.00000
   90    6 GLN  HE21 -34.10670  50.39563  -2.02034 1S   24     0.00000
   91    6 GLN  HE22 -32.89753  49.74056  -0.96773 1S   24     0.00000
   92    6 GLN  C    -32.69101  43.71415  -1.96070 1S   24     1.00000
   93    6 GLN  O    -33.47247  42.80229  -1.70891 1S   24     1.00000
   94    7 ALA  N    -31.83936  43.66227  -3.01418 1S   25     1.00000
   95    7 ALA  HN   -31.24325  44.43462  -3.22716 1S   25     0.00000
   96    7 ALA  CA   -31.71080  42.52659  -3.90146 1S   25     1.00000
   97    7 ALA  HA   -32.69663  42.28098  -4.27193 1S   25     0.00000
   98    7 ALA  CB   -30.79141  42.82402  -5.09670 1S   25     1.00000
   99    7 ALA  HB1  -29.77478  43.11168  -4.75534 1S   25     0.00000
  100    7 ALA  HB2  -31.20907  43.66311  -5.69294 1S   25     0.00000
  101    7 ALA  HB3  -30.70436  41.93694  -5.76062 1S   25     0.00000
  102    7 ALA  C    -31.16125  41.32428  -3.17563 1S   25     1.00000
  103    7 ALA  O    -31.60854  40.20711  -3.40900 1S   25     1.00000
  104    8 LYS  N    -30.20702  41.53238  -2.23724 1S   26     1.00000
  105    8 LYS  HN   -29.82320  42.44434  -2.09895 1S   26     0.00000
  106    8 LYS  CA   -29.68917  40.50135  -1.36290 1S   26     1.00000
  107    8 LYS  HA   -29.28980  39.70638  -1.97759 1S   26     0.00000
  108    8 LYS  CB   -28.58952  41.01934  -0.41383 1S   26     1.00000
  109    8 LYS  HB1  -28.41287  40.28608   0.40704 1S   26     0.00000
  110    8 LYS  HB2  -28.92533  41.97117   0.05157 1S   26     0.00000
  111    8 LYS  CG   -27.23816  41.24716  -1.09723 1S   26     1.00000
  112    8 LYS  HG1  -27.35676  41.96596  -1.93595 1S   26     0.00000
  113    8 LYS  HG2  -26.87476  40.28445  -1.51933 1S   26     0.00000
  114    8 LYS  CD   -26.20783  41.79293  -0.10097 1S   26     1.00000
  115    8 LYS  HD1  -26.07589  41.05510   0.72202 1S   26     0.00000
  116    8 LYS  HD2  -26.62667  42.72643   0.33997 1S   26     0.00000
  117    8 LYS  CE   -24.85286  42.09735  -0.74213 1S   26     1.00000
  118    8 LYS  HE1  -24.98818  42.76164  -1.61963 1S   26     0.00000
  119    8 LYS  HE2  -24.34344  41.16602  -1.06663 1S   26     0.00000
  120    8 LYS  NZ   -23.97284  42.79867   0.21860 1S   26     1.00000
  121    8 LYS  HZ1  -23.59250  42.11905   0.90761 1S   26     0.00000
  122    8 LYS  HZ2  -24.52452  43.52509   0.71883 1S   26     0.00000
  123    8 LYS  HZ3  -23.19255  43.25534  -0.29636 1S   26     0.00000
  124    8 LYS  C    -30.76963  39.91810  -0.49139 1S   26     1.00000
  125    8 LYS  O    -30.82168  38.70545  -0.32599 1S   26     1.00000
  126    9 THR  N    -31.66326  40.76715   0.06945 1S   27     1.00000
  127    9 THR  HN   -31.59312  41.75249  -0.07675 1S   27     0.00000
  128    9 THR  CA   -32.74015  40.34795   0.94858 1S   27     1.00000
  129    9 THR  HA   -32.31918  39.66466   1.67348 1S   27     0.00000
  130    9 THR  CB   -33.37263  41.51766   1.68821 1S   27     1.00000
  131    9 THR  HB   -33.91734  42.17669   0.97561 1S   27     0.00000
  132    9 THR  OG1  -32.36709  42.30685   2.30865 1S   27     1.00000
  133    9 THR  HG1  -31.87666  41.71271   2.88141 1S   27     0.00000
  134    9 THR  CG2  -34.34140  41.02972   2.78265 1S   27     1.00000
  135    9 THR  HG21 -33.80957  40.37462   3.50536 1S   27     0.00000
  136    9 THR  HG22 -35.18637  40.45971   2.34500 1S   27     0.00000
  137    9 THR  HG23 -34.76245  41.89617   3.33582 1S   27     0.00000
  138    9 THR  C    -33.80559  39.60927   0.16692 1S   27     1.00000
  139    9 THR  O    -34.38014  38.63426   0.64636 1S   27     1.00000
  140   10 PHE  N    -34.06310  40.04442  -1.08686 1S   28     1.00000
  141   10 PHE  HN   -33.60531  40.86048  -1.43760 1S   28     0.00000
  142   10 PHE  CA   -34.97394  39.41824  -2.01757 1S   28     1.00000
  143   10 PHE  HA   -35.93460  39.32464  -1.52984 1S   28     0.00000
  144   10 PHE  CB   -35.12328  40.29904  -3.28998 1S   28     1.00000
  145   10 PHE  HB1  -34.11988  40.57376  -3.67576 1S   28     0.00000
  146   10 PHE  HB2  -35.65673  41.23573  -3.02652 1S   28     0.00000
  147   10 PHE  CG   -35.88753  39.61981  -4.39327 1S   28     1.00000
  148   10 PHE  CD1  -37.24772  39.30513  -4.24400 1S   28     1.00000
  149   10 PHE  HD1  -37.77410  39.59689  -3.34738 1S   28     0.00000
  150   10 PHE  CE1  -37.91756  38.58298  -5.23807 1S   28     1.00000
  151   10 PHE  HE1  -38.96109  38.33323  -5.11577 1S   28     0.00000
  152   10 PHE  CZ   -37.22993  38.16737  -6.38485 1S   28     1.00000
  153   10 PHE  HZ   -37.74510  37.60033  -7.14392 1S   28     0.00000
  154   10 PHE  CD2  -35.20623  39.19882  -5.54659 1S   28     1.00000
  155   10 PHE  HD2  -34.15195  39.40857  -5.65684 1S   28     0.00000
  156   10 PHE  CE2  -35.87209  38.47096  -6.53432 1S   28     1.00000
  157   10 PHE  HE2  -35.32837  38.13935  -7.40365 1S   28     0.00000
  158   10 PHE  C    -34.49356  38.02667  -2.37310 1S   28     1.00000
  159   10 PHE  O    -35.27402  37.07959  -2.34921 1S   28     1.00000
  160   11 LEU  N    -33.19109  37.87461  -2.69861 1S   29     1.00000
  161   11 LEU  HN   -32.57736  38.66203  -2.74092 1S   29     0.00000
  162   11 LEU  CA   -32.59118  36.60302  -3.02910 1S   29     1.00000
  163   11 LEU  HA   -33.21328  36.12438  -3.76915 1S   29     0.00000
  164   11 LEU  CB   -31.15516  36.74958  -3.56527 1S   29     1.00000
  165   11 LEU  HB1  -30.65631  35.75474  -3.61245 1S   29     0.00000
  166   11 LEU  HB2  -30.57331  37.38817  -2.86392 1S   29     0.00000
  167   11 LEU  CG   -31.10157  37.36458  -4.97862 1S   29     1.00000
  168   11 LEU  HG   -31.70435  38.30119  -4.97727 1S   29     0.00000
  169   11 LEU  CD1  -29.65849  37.75719  -5.33490 1S   29     1.00000
  170   11 LEU  HD11 -29.00409  36.86062  -5.33465 1S   29     0.00000
  171   11 LEU  HD12 -29.26835  38.47925  -4.58626 1S   29     0.00000
  172   11 LEU  HD13 -29.62200  38.23077  -6.33854 1S   29     0.00000
  173   11 LEU  CD2  -31.71826  36.42576  -6.03392 1S   29     1.00000
  174   11 LEU  HD21 -32.81198  36.31913  -5.87433 1S   29     0.00000
  175   11 LEU  HD22 -31.25239  35.41949  -5.97099 1S   29     0.00000
  176   11 LEU  HD23 -31.55540  36.83164  -7.05403 1S   29     0.00000
  177   11 LEU  C    -32.54433  35.69994  -1.83709 1S   29     1.00000
  178   11 LEU  O    -32.70961  34.49334  -1.98089 1S   29     1.00000
  179   12 ASP  N    -32.36920  36.27056  -0.62226 1S   30     1.00000
  180   12 ASP  HN   -32.19720  37.25058  -0.53694 1S   30     0.00000
  181   12 ASP  CA   -32.40979  35.54599   0.62446 1S   30     1.00000
  182   12 ASP  HA   -31.66184  34.76909   0.53850 1S   30     0.00000
  183   12 ASP  CB   -32.10236  36.46713   1.83978 1S   30     1.00000
  184   12 ASP  HB1  -33.02418  36.90757   2.27093 1S   30     0.00000
  185   12 ASP  HB2  -31.46739  37.30699   1.48969 1S   30     0.00000
  186   12 ASP  CG   -31.31004  35.75578   2.93832 1S   30     1.00000
  187   12 ASP  OD1  -31.26866  34.49863   2.94850 1S   30     1.00000
  188   12 ASP  OD2  -30.71739  36.48298   3.77985 1S   30     1.00000
  189   12 ASP  C    -33.76522  34.89446   0.76689 1S   30     1.00000
  190   12 ASP  O    -33.85367  33.69915   0.98508 1S   30     1.00000
  191   13 LYS  N    -34.86372  35.64486   0.53974 1S   31     1.00000
  192   13 LYS  HN   -34.78085  36.61542   0.31861 1S   31     0.00000
  193   13 LYS  CA   -36.21226  35.11998   0.56698 1S   31     1.00000
  194   13 LYS  HA   -36.35424  34.64161   1.52644 1S   31     0.00000
  195   13 LYS  CB   -37.23268  36.27263   0.41449 1S   31     1.00000
  196   13 LYS  HB1  -36.90961  36.92459  -0.42597 1S   31     0.00000
  197   13 LYS  HB2  -37.19776  36.88910   1.34039 1S   31     0.00000
  198   13 LYS  CG   -38.69001  35.85797   0.15438 1S   31     1.00000
  199   13 LYS  HG1  -38.75029  35.23928  -0.76798 1S   31     0.00000
  200   13 LYS  HG2  -39.28540  36.77843  -0.03604 1S   31     0.00000
  201   13 LYS  CD   -39.33264  35.09224   1.31621 1S   31     1.00000
  202   13 LYS  HD1  -39.32149  35.73816   2.22222 1S   31     0.00000
  203   13 LYS  HD2  -38.73050  34.18155   1.53339 1S   31     0.00000
  204   13 LYS  CE   -40.76794  34.67895   0.98918 1S   31     1.00000
  205   13 LYS  HE1  -40.79075  34.05697   0.06799 1S   31     0.00000
  206   13 LYS  HE2  -41.41132  35.57240   0.84426 1S   31     0.00000
  207   13 LYS  NZ   -41.33473  33.87654   2.09035 1S   31     1.00000
  208   13 LYS  HZ1  -40.62057  33.74387   2.83336 1S   31     0.00000
  209   13 LYS  HZ2  -41.61110  32.93839   1.71068 1S   31     0.00000
  210   13 LYS  HZ3  -42.17378  34.34629   2.48291 1S   31     0.00000
  211   13 LYS  C    -36.45253  34.07282  -0.50507 1S   31     1.00000
  212   13 LYS  O    -37.02121  33.01846  -0.21874 1S   31     1.00000
  213   14 PHE  N    -36.00704  34.33626  -1.76020 1S   32     1.00000
  214   14 PHE  HN   -35.55098  35.20338  -1.95717 1S   32     0.00000
  215   14 PHE  CA   -36.15702  33.45459  -2.90116 1S   32     1.00000
  216   14 PHE  HA   -37.21775  33.31045  -3.05734 1S   32     0.00000
  217   14 PHE  CB   -35.53281  34.05695  -4.20041 1S   32     1.00000
  218   14 PHE  HB1  -34.50038  34.40248  -3.99098 1S   32     0.00000
  219   14 PHE  HB2  -36.13435  34.93368  -4.52440 1S   32     0.00000
  220   14 PHE  CG   -35.46730  33.07101  -5.35070 1S   32     1.00000
  221   14 PHE  CD1  -36.58156  32.84088  -6.16622 1S   32     1.00000
  222   14 PHE  HD1  -37.47328  33.41631  -5.99944 1S   32     0.00000
  223   14 PHE  CE1  -36.54711  31.86923  -7.17390 1S   32     1.00000
  224   14 PHE  HE1  -37.41325  31.70971  -7.79765 1S   32     0.00000
  225   14 PHE  CZ   -35.39665  31.09212  -7.35434 1S   32     1.00000
  226   14 PHE  HZ   -35.37002  30.32963  -8.11890 1S   32     0.00000
  227   14 PHE  CD2  -34.31196  32.29401  -5.55115 1S   32     1.00000
  228   14 PHE  HD2  -33.45404  32.43862  -4.91208 1S   32     0.00000
  229   14 PHE  CE2  -34.28366  31.29703  -6.53064 1S   32     1.00000
  230   14 PHE  HE2  -33.40482  30.68314  -6.64436 1S   32     0.00000
  231   14 PHE  C    -35.55216  32.10326  -2.61992 1S   32     1.00000
  232   14 PHE  O    -36.21231  31.09952  -2.84667 1S   32     1.00000
  233   15 ASN  N    -34.29116  32.05346  -2.13347 1S   33     1.00000
  234   15 ASN  HN   -33.79142  32.89916  -1.94771 1S   33     0.00000
  235   15 ASN  CA   -33.53257  30.83618  -1.92856 1S   33     1.00000
  236   15 ASN  HA   -33.42329  30.35411  -2.89109 1S   33     0.00000
  237   15 ASN  CB   -32.14030  31.11537  -1.30482 1S   33     1.00000
  238   15 ASN  HB1  -31.64736  30.16223  -1.01465 1S   33     0.00000
  239   15 ASN  HB2  -32.26422  31.74367  -0.39598 1S   33     0.00000
  240   15 ASN  CG   -31.22307  31.82343  -2.31081 1S   33     1.00000
  241   15 ASN  OD1  -31.35437  31.66617  -3.52892 1S   33     1.00000
  242   15 ASN  ND2  -30.24587  32.61234  -1.77088 1S   33     1.00000
  243   15 ASN  HD21 -30.18605  32.71946  -0.77772 1S   33     0.00000
  244   15 ASN  HD22 -29.62527  33.10704  -2.37407 1S   33     0.00000
  245   15 ASN  C    -34.24759  29.86235  -1.02594 1S   33     1.00000
  246   15 ASN  O    -34.30175  28.67157  -1.32268 1S   33     1.00000
  247   16 HSE  N    -34.83912  30.35508   0.08525 1S   34     1.00000
  248   16 HSE  HN   -34.79975  31.32900   0.30407 1S   34     0.00000
  249   16 HSE  CA   -35.49680  29.51697   1.06239 1S   34     1.00000
  250   16 HSE  HA   -34.86846  28.65307   1.22984 1S   34     0.00000
  251   16 HSE  CB   -35.69243  30.22251   2.42722 1S   34     1.00000
  252   16 HSE  HB1  -36.26499  29.56086   3.11129 1S   34     0.00000
  253   16 HSE  HB2  -36.27273  31.16125   2.28707 1S   34     0.00000
  254   16 HSE  ND1  -33.62667  31.59164   2.63017 1S   34     1.00000
  255   16 HSE  CG   -34.38137  30.54895   3.10628 1S   34     1.00000
  256   16 HSE  CE1  -32.55427  31.63831   3.38459 1S   34     1.00000
  257   16 HSE  HE1  -31.74789  32.36089   3.27447 1S   34     0.00000
  258   16 HSE  NE2  -32.56717  30.66870   4.33001 1S   34     1.00000
  259   16 HSE  HE2  -31.86667  30.49760   5.02118 1S   34     0.00000
  260   16 HSE  CD2  -33.74118  29.96077   4.15566 1S   34     1.00000
  261   16 HSE  HD2  -34.02654  29.11695   4.76288 1S   34     0.00000
  262   16 HSE  C    -36.82022  29.01371   0.53728 1S   34     1.00000
  263   16 HSE  O    -37.15655  27.84693   0.73423 1S   34     1.00000
  264   17 GLU  N    -37.58918  29.86518  -0.18415 1S   35     1.00000
  265   17 GLU  HN   -37.31715  30.81355  -0.33962 1S   35     0.00000
  266   17 GLU  CA   -38.86163  29.47029  -0.75053 1S   35     1.00000
  267   17 GLU  HA   -39.39458  28.95159   0.02962 1S   35     0.00000
  268   17 GLU  CB   -39.68718  30.69697  -1.21804 1S   35     1.00000
  269   17 GLU  HB1  -39.45052  30.93274  -2.27618 1S   35     0.00000
  270   17 GLU  HB2  -39.37558  31.58463  -0.62410 1S   35     0.00000
  271   17 GLU  CG   -41.21560  30.54082  -1.06989 1S   35     1.00000
  272   17 GLU  HG1  -41.57747  29.65152  -1.62554 1S   35     0.00000
  273   17 GLU  HG2  -41.70762  31.44211  -1.49760 1S   35     0.00000
  274   17 GLU  CD   -41.61949  30.42305   0.40222 1S   35     1.00000
  275   17 GLU  OE1  -41.53727  29.30249   0.96913 1S   35     1.00000
  276   17 GLU  OE2  -42.03028  31.46319   0.97951 1S   35     1.00000
  277   17 GLU  C    -38.67815  28.50083  -1.89930 1S   35     1.00000
  278   17 GLU  O    -39.41165  27.52191  -2.02939 1S   35     1.00000
  279   18 ALA  N    -37.64847  28.74967  -2.74058 1S   36     1.00000
  280   18 ALA  HN   -37.06658  29.55011  -2.59621 1S   36     0.00000
  281   18 ALA  CA   -37.31824  27.98453  -3.91522 1S   36     1.00000
  282   18 ALA  HA   -38.21775  27.91916  -4.50640 1S   36     0.00000
  283   18 ALA  CB   -36.18519  28.62315  -4.74302 1S   36     1.00000
  284   18 ALA  HB1  -35.25281  28.70937  -4.14531 1S   36     0.00000
  285   18 ALA  HB2  -36.47950  29.64398  -5.06259 1S   36     0.00000
  286   18 ALA  HB3  -35.96938  28.02431  -5.65354 1S   36     0.00000
  287   18 ALA  C    -36.87746  26.59763  -3.57848 1S   36     1.00000
  288   18 ALA  O    -37.26648  25.65524  -4.25723 1S   36     1.00000
  289   19 GLU  N    -36.06982  26.43959  -2.50572 1S   37     1.00000
  290   19 GLU  HN   -35.76307  27.23168  -1.98062 1S   37     0.00000
  291   19 GLU  CA   -35.55658  25.16856  -2.04959 1S   37     1.00000
  292   19 GLU  HA   -34.95182  24.75830  -2.84659 1S   37     0.00000
  293   19 GLU  CB   -34.68619  25.34872  -0.78425 1S   37     1.00000
  294   19 GLU  HB1  -35.33315  25.71389   0.04464 1S   37     0.00000
  295   19 GLU  HB2  -33.94507  26.15391  -0.98101 1S   37     0.00000
  296   19 GLU  CG   -33.95917  24.07328  -0.30794 1S   37     1.00000
  297   19 GLU  HG1  -34.41809  23.17149  -0.76459 1S   37     0.00000
  298   19 GLU  HG2  -34.06204  23.98932   0.79501 1S   37     0.00000
  299   19 GLU  CD   -32.46772  24.09014  -0.64199 1S   37     1.00000
  300   19 GLU  OE1  -32.00266  23.12457  -1.30429 1S   37     1.00000
  301   19 GLU  OE2  -31.76591  25.05074  -0.22711 1S   37     1.00000
  302   19 GLU  C    -36.67473  24.19671  -1.74901 1S   37     1.00000
  303   19 GLU  O    -36.62225  23.04706  -2.17614 1S   37     1.00000
  304   20 ASP  N    -37.73633  24.65182  -1.04040 1S   38     1.00000
  305   20 ASP  HN   -37.78952  25.59899  -0.73129 1S   38     0.00000
  306   20 ASP  CA   -38.84210  23.80253  -0.66591 1S   38     1.00000
  307   20 ASP  HA   -38.41575  22.87025  -0.31833 1S   38     0.00000
  308   20 ASP  CB   -39.68648  24.41695   0.47917 1S   38     1.00000
  309   20 ASP  HB1  -40.28011  25.28037   0.11389 1S   38     0.00000
  310   20 ASP  HB2  -39.00593  24.77874   1.27976 1S   38     0.00000
  311   20 ASP  CG   -40.60643  23.35506   1.08547 1S   38     1.00000
  312   20 ASP  OD1  -40.06262  22.35657   1.63092 1S   38     1.00000
  313   20 ASP  OD2  -41.85084  23.51992   0.99614 1S   38     1.00000
  314   20 ASP  C    -39.71977  23.49087  -1.85956 1S   38     1.00000
  315   20 ASP  O    -40.08764  22.33889  -2.06211 1S   38     1.00000
  316   21 LEU  N    -40.06207  24.49639  -2.69698 1S   39     1.00000
  317   21 LEU  HN   -39.75981  25.43425  -2.53355 1S   39     0.00000
  318   21 LEU  CA   -40.92838  24.29770  -3.84249 1S   39     1.00000
  319   21 LEU  HA   -41.79689  23.75881  -3.49644 1S   39     0.00000
  320   21 LEU  CB   -41.36302  25.63404  -4.47411 1S   39     1.00000
  321   21 LEU  HB1  -41.67502  25.48316  -5.53183 1S   39     0.00000
  322   21 LEU  HB2  -40.49893  26.33495  -4.47153 1S   39     0.00000
  323   21 LEU  CG   -42.56287  26.28022  -3.75485 1S   39     1.00000
  324   21 LEU  HG   -42.32766  26.36402  -2.66921 1S   39     0.00000
  325   21 LEU  CD1  -42.79647  27.69541  -4.29477 1S   39     1.00000
  326   21 LEU  HD11 -43.01911  27.63567  -5.38020 1S   39     0.00000
  327   21 LEU  HD12 -41.89144  28.32233  -4.14667 1S   39     0.00000
  328   21 LEU  HD13 -43.65426  28.17736  -3.78099 1S   39     0.00000
  329   21 LEU  CD2  -43.83697  25.42771  -3.92032 1S   39     1.00000
  330   21 LEU  HD21 -43.75383  24.47337  -3.36080 1S   39     0.00000
  331   21 LEU  HD22 -44.00209  25.19493  -4.99444 1S   39     0.00000
  332   21 LEU  HD23 -44.72190  25.97707  -3.53782 1S   39     0.00000
  333   21 LEU  C    -40.30712  23.44001  -4.91493 1S   39     1.00000
  334   21 LEU  O    -40.99099  22.61722  -5.52276 1S   39     1.00000
  335   22 PHE  N    -38.98307  23.58082  -5.14368 1S   40     1.00000
  336   22 PHE  HN   -38.44882  24.27739  -4.66456 1S   40     0.00000
  337   22 PHE  CA   -38.22909  22.74036  -6.04418 1S   40     1.00000
  338   22 PHE  HA   -38.74314  22.73427  -6.99623 1S   40     0.00000
  339   22 PHE  CB   -36.78139  23.26722  -6.24290 1S   40     1.00000
  340   22 PHE  HB1  -36.23876  23.28291  -5.27272 1S   40     0.00000
  341   22 PHE  HB2  -36.81915  24.30710  -6.63153 1S   40     0.00000
  342   22 PHE  CG   -35.99689  22.43802  -7.22863 1S   40     1.00000
  343   22 PHE  CD1  -36.14991  22.61798  -8.61286 1S   40     1.00000
  344   22 PHE  HD1  -36.82343  23.37379  -8.98276 1S   40     0.00000
  345   22 PHE  CE1  -35.44550  21.81379  -9.51814 1S   40     1.00000
  346   22 PHE  HE1  -35.56946  21.96013 -10.58086 1S   40     0.00000
  347   22 PHE  CZ   -34.58668  20.81430  -9.04356 1S   40     1.00000
  348   22 PHE  HZ   -34.05146  20.18331  -9.73775 1S   40     0.00000
  349   22 PHE  CD2  -35.12868  21.43673  -6.76476 1S   40     1.00000
  350   22 PHE  HD2  -35.01894  21.27788  -5.70242 1S   40     0.00000
  351   22 PHE  CE2  -34.42782  20.62856  -7.66511 1S   40     1.00000
  352   22 PHE  HE2  -33.77924  19.85157  -7.29370 1S   40     0.00000
  353   22 PHE  C    -38.19603  21.32787  -5.50745 1S   40     1.00000
  354   22 PHE  O    -38.30973  20.38033  -6.27700 1S   40     1.00000
  355   23 TYR  N    -38.06709  21.15827  -4.17019 1S   41     1.00000
  356   23 TYR  HN   -38.00373  21.94278  -3.55594 1S   41     0.00000
  357   23 TYR  CA   -37.97563  19.86512  -3.53150 1S   41     1.00000
  358   23 TYR  HA   -37.16689  19.33645  -4.01839 1S   41     0.00000
  359   23 TYR  CB   -37.66186  19.99216  -2.01983 1S   41     1.00000
  360   23 TYR  HB1  -38.51539  20.42933  -1.46075 1S   41     0.00000
  361   23 TYR  HB2  -36.78070  20.65302  -1.88556 1S   41     0.00000
  362   23 TYR  CG   -37.30411  18.66379  -1.41878 1S   41     1.00000
  363   23 TYR  CD1  -36.00783  18.15418  -1.57489 1S   41     1.00000
  364   23 TYR  HD1  -35.26419  18.73214  -2.10166 1S   41     0.00000
  365   23 TYR  CE1  -35.66935  16.90565  -1.04709 1S   41     1.00000
  366   23 TYR  HE1  -34.66803  16.53494  -1.17432 1S   41     0.00000
  367   23 TYR  CZ   -36.62454  16.15543  -0.35187 1S   41     1.00000
  368   23 TYR  OH   -36.29780  14.88935   0.17413 1S   41     1.00000
  369   23 TYR  HH   -35.52657  14.55718  -0.30272 1S   41     0.00000
  370   23 TYR  CD2  -38.25911  17.90726  -0.71978 1S   41     1.00000
  371   23 TYR  HD2  -39.26501  18.28400  -0.60525 1S   41     0.00000
  372   23 TYR  CE2  -37.91854  16.66082  -0.18249 1S   41     1.00000
  373   23 TYR  HE2  -38.65965  16.08546   0.35211 1S   41     0.00000
  374   23 TYR  C    -39.24263  19.06518  -3.72462 1S   41     1.00000
  375   23 TYR  O    -39.17126  17.88366  -4.04761 1S   41     1.00000
  376   24 GLN  N    -40.42908  19.69809  -3.56000 1S   42     1.00000
  377   24 GLN  HN   -40.46373  20.65870  -3.28848 1S   42     0.00000
  378   24 GLN  CA   -41.71015  19.04482  -3.73063 1S   42     1.00000
  379   24 GLN  HA   -41.70458  18.15469  -3.11791 1S   42     0.00000
  380   24 GLN  CB   -42.90403  19.94695  -3.33209 1S   42     1.00000
  381   24 GLN  HB1  -43.85972  19.40117  -3.49956 1S   42     0.00000
  382   24 GLN  HB2  -42.90838  20.84280  -3.99438 1S   42     0.00000
  383   24 GLN  CG   -42.87750  20.45579  -1.87567 1S   42     1.00000
  384   24 GLN  HG1  -43.67608  21.21997  -1.75412 1S   42     0.00000
  385   24 GLN  HG2  -41.90684  20.93840  -1.65768 1S   42     0.00000
  386   24 GLN  CD   -43.10673  19.34278  -0.84517 1S   42     1.00000
  387   24 GLN  OE1  -43.22844  18.15482  -1.15808 1S   42     1.00000
  388   24 GLN  NE2  -43.17812  19.77120   0.45180 1S   42     1.00000
  389   24 GLN  HE21 -43.03958  20.74007   0.66406 1S   42     0.00000
  390   24 GLN  HE22 -43.37074  19.11453   1.17670 1S   42     0.00000
  391   24 GLN  C    -41.91950  18.61741  -5.16138 1S   42     1.00000
  392   24 GLN  O    -42.39518  17.51405  -5.41648 1S   42     1.00000
  393   25 SER  N    -41.52922  19.48170  -6.12853 1S   43     1.00000
  394   25 SER  HN   -41.16562  20.37884  -5.88425 1S   43     0.00000
  395   25 SER  CA   -41.60649  19.21131  -7.54864 1S   43     1.00000
  396   25 SER  HA   -42.63635  18.97230  -7.77156 1S   43     0.00000
  397   25 SER  CB   -41.18094  20.44061  -8.38637 1S   43     1.00000
  398   25 SER  HB1  -40.08838  20.62160  -8.29490 1S   43     0.00000
  399   25 SER  HB2  -41.71418  21.33803  -8.00475 1S   43     0.00000
  400   25 SER  OG   -41.51957  20.27753  -9.75936 1S   43     1.00000
  401   25 SER  HG1  -41.23561  21.07901 -10.20528 1S   43     0.00000
  402   25 SER  C    -40.75671  18.02239  -7.93446 1S   43     1.00000
  403   25 SER  O    -41.24086  17.10862  -8.59571 1S   43     1.00000
  404   26 SER  N    -39.47684  17.99301  -7.49149 1S   44     1.00000
  405   26 SER  HN   -39.09772  18.75996  -6.97335 1S   44     0.00000
  406   26 SER  CA   -38.54081  16.91524  -7.74493 1S   44     1.00000
  407   26 SER  HA   -38.46204  16.79074  -8.81588 1S   44     0.00000
  408   26 SER  CB   -37.14295  17.19038  -7.15251 1S   44     1.00000
  409   26 SER  HB1  -36.43714  16.38349  -7.44584 1S   44     0.00000
  410   26 SER  HB2  -37.18848  17.24629  -6.04298 1S   44     0.00000
  411   26 SER  OG   -36.63483  18.41883  -7.64581 1S   44     1.00000
  412   26 SER  HG1  -36.00807  18.73963  -6.99104 1S   44     0.00000
  413   26 SER  C    -39.01059  15.62093  -7.14272 1S   44     1.00000
  414   26 SER  O    -38.80717  14.55570  -7.71468 1S   44     1.00000
  415   27 LEU  N    -39.67463  15.69111  -5.97009 1S   45     1.00000
  416   27 LEU  HN   -39.80393  16.56632  -5.50546 1S   45     0.00000
  417   27 LEU  CA   -40.18159  14.53999  -5.27121 1S   45     1.00000
  418   27 LEU  HA   -39.38053  13.81714  -5.27783 1S   45     0.00000
  419   27 LEU  CB   -40.56463  14.90964  -3.82182 1S   45     1.00000
  420   27 LEU  HB1  -41.50736  15.49921  -3.80575 1S   45     0.00000
  421   27 LEU  HB2  -39.76247  15.57568  -3.43226 1S   45     0.00000
  422   27 LEU  CG   -40.67356  13.73158  -2.83066 1S   45     1.00000
  423   27 LEU  HG   -41.62332  13.18530  -3.03077 1S   45     0.00000
  424   27 LEU  CD1  -39.51182  12.72785  -2.97092 1S   45     1.00000
  425   27 LEU  HD11 -38.53893  13.26448  -2.94975 1S   45     0.00000
  426   27 LEU  HD12 -39.58996  12.16675  -3.92617 1S   45     0.00000
  427   27 LEU  HD13 -39.53211  11.99408  -2.13926 1S   45     0.00000
  428   27 LEU  CD2  -40.72947  14.28785  -1.39743 1S   45     1.00000
  429   27 LEU  HD21 -41.58973  14.98004  -1.27953 1S   45     0.00000
  430   27 LEU  HD22 -39.79579  14.84841  -1.18113 1S   45     0.00000
  431   27 LEU  HD23 -40.82436  13.46445  -0.65961 1S   45     0.00000
  432   27 LEU  C    -41.36617  13.93716  -5.98395 1S   45     1.00000
  433   27 LEU  O    -41.45719  12.72067  -6.12163 1S   45     1.00000
  434   28 ALA  N    -42.28670  14.78330  -6.49955 1S   46     1.00000
  435   28 ALA  HN   -42.20582  15.77084  -6.36722 1S   46     0.00000
  436   28 ALA  CA   -43.44087  14.35159  -7.25602 1S   46     1.00000
  437   28 ALA  HA   -43.92992  13.56474  -6.69869 1S   46     0.00000
  438   28 ALA  CB   -44.43699  15.50446  -7.46704 1S   46     1.00000
  439   28 ALA  HB1  -43.96852  16.33984  -8.03002 1S   46     0.00000
  440   28 ALA  HB2  -44.77660  15.89575  -6.48435 1S   46     0.00000
  441   28 ALA  HB3  -45.33119  15.15054  -8.02138 1S   46     0.00000
  442   28 ALA  C    -43.03354  13.79491  -8.60200 1S   46     1.00000
  443   28 ALA  O    -43.59549  12.80583  -9.06935 1S   46     1.00000
  444   29 SER  N    -41.99851  14.40075  -9.23048 1S   47     1.00000
  445   29 SER  HN   -41.58991  15.22591  -8.84082 1S   47     0.00000
  446   29 SER  CA   -41.39555  13.94379 -10.46348 1S   47     1.00000
  447   29 SER  HA   -42.18706  13.81937 -11.18524 1S   47     0.00000
  448   29 SER  CB   -40.36821  14.97352 -11.00556 1S   47     1.00000
  449   29 SER  HB1  -39.56247  15.14154 -10.26171 1S   47     0.00000
  450   29 SER  HB2  -40.89018  15.94040 -11.17516 1S   47     0.00000
  451   29 SER  OG   -39.78695  14.56783 -12.24109 1S   47     1.00000
  452   29 SER  HG1  -39.14907  15.24497 -12.48091 1S   47     0.00000
  453   29 SER  C    -40.74177  12.59654 -10.27490 1S   47     1.00000
  454   29 SER  O    -40.84356  11.73383 -11.14234 1S   47     1.00000
  455   30 TRP  N    -40.08571  12.36970  -9.11511 1S   48     1.00000
  456   30 TRP  HN   -40.00968  13.08555  -8.42248 1S   48     0.00000
  457   30 TRP  CA   -39.43957  11.12089  -8.78454 1S   48     1.00000
  458   30 TRP  HA   -38.76195  10.87768  -9.59152 1S   48     0.00000
  459   30 TRP  CB   -38.62638  11.21835  -7.46294 1S   48     1.00000
  460   30 TRP  HB1  -39.28081  11.62994  -6.66605 1S   48     0.00000
  461   30 TRP  HB2  -37.79183  11.93639  -7.61730 1S   48     0.00000
  462   30 TRP  CG   -38.06105   9.89838  -6.96487 1S   48     1.00000
  463   30 TRP  CD1  -38.66852   8.98592  -6.14738 1S   48     1.00000
  464   30 TRP  HD1  -39.63232   9.12766  -5.68156 1S   48     0.00000
  465   30 TRP  NE1  -37.88578   7.86521  -6.01858 1S   48     1.00000
  466   30 TRP  HE1  -38.11531   7.06425  -5.50636 1S   48     0.00000
  467   30 TRP  CE2  -36.75000   8.03373  -6.77512 1S   48     1.00000
  468   30 TRP  CD2  -36.82810   9.29913  -7.39809 1S   48     1.00000
  469   30 TRP  CE3  -35.82918   9.74620  -8.25182 1S   48     1.00000
  470   30 TRP  HE3  -35.88307  10.70269  -8.74410 1S   48     0.00000
  471   30 TRP  CZ3  -34.72243   8.91044  -8.45627 1S   48     1.00000
  472   30 TRP  HZ3  -33.91981   9.23712  -9.09856 1S   48     0.00000
  473   30 TRP  CZ2  -35.65917   7.20102  -6.99303 1S   48     1.00000
  474   30 TRP  HZ2  -35.58968   6.22725  -6.53191 1S   48     0.00000
  475   30 TRP  CH2  -34.64162   7.65410  -7.83947 1S   48     1.00000
  476   30 TRP  HH2  -33.78243   7.02719  -8.02246 1S   48     0.00000
  477   30 TRP  C    -40.45085  10.00328  -8.67714 1S   48     1.00000
  478   30 TRP  O    -40.21662   8.91342  -9.19414 1S   48     1.00000
  479   31 ASN  N    -41.59659  10.24963  -8.00053 1S   49     1.00000
  480   31 ASN  HN   -41.77279  11.14511  -7.59525 1S   49     0.00000
  481   31 ASN  CA   -42.60035   9.23566  -7.75667 1S   49     1.00000
  482   31 ASN  HA   -42.09336   8.35908  -7.37400 1S   49     0.00000
  483   31 ASN  CB   -43.67885   9.68129  -6.74230 1S   49     1.00000
  484   31 ASN  HB1  -44.45061   8.88872  -6.62974 1S   49     0.00000
  485   31 ASN  HB2  -44.16993  10.61207  -7.09650 1S   49     0.00000
  486   31 ASN  CG   -43.02783   9.90364  -5.37190 1S   49     1.00000
  487   31 ASN  OD1  -42.15646   9.13797  -4.94656 1S   49     1.00000
  488   31 ASN  ND2  -43.47582  10.97820  -4.65846 1S   49     1.00000
  489   31 ASN  HD21 -43.07655  11.17275  -3.76610 1S   49     0.00000
  490   31 ASN  HD22 -44.17573  11.57749  -5.04671 1S   49     0.00000
  491   31 ASN  C    -43.28018   8.82232  -9.03605 1S   49     1.00000
  492   31 ASN  O    -43.64481   7.66334  -9.18777 1S   49     1.00000
  493   32 TYR  N    -43.41690   9.74196 -10.01686 1S   50     1.00000
  494   32 TYR  HN   -43.15640  10.69476  -9.87271 1S   50     0.00000
  495   32 TYR  CA   -43.88688   9.40711 -11.34241 1S   50     1.00000
  496   32 TYR  HA   -44.78733   8.81960 -11.23891 1S   50     0.00000
  497   32 TYR  CB   -44.20485  10.68973 -12.16383 1S   50     1.00000
  498   32 TYR  HB1  -43.33617  11.38169 -12.13724 1S   50     0.00000
  499   32 TYR  HB2  -45.07922  11.21233 -11.72103 1S   50     0.00000
  500   32 TYR  CG   -44.52902  10.36905 -13.60223 1S   50     1.00000
  501   32 TYR  CD1  -45.68518   9.64654 -13.93044 1S   50     1.00000
  502   32 TYR  HD1  -46.39306   9.37613 -13.16135 1S   50     0.00000
  503   32 TYR  CE1  -45.91099   9.24206 -15.24949 1S   50     1.00000
  504   32 TYR  HE1  -46.80726   8.68906 -15.48412 1S   50     0.00000
  505   32 TYR  CZ   -44.99472   9.56763 -16.25703 1S   50     1.00000
  506   32 TYR  OH   -45.25120   9.20199 -17.59515 1S   50     1.00000
  507   32 TYR  HH   -46.15354   8.87948 -17.64552 1S   50     0.00000
  508   32 TYR  CD2  -43.59659  10.66116 -14.61270 1S   50     1.00000
  509   32 TYR  HD2  -42.68279  11.17657 -14.36231 1S   50     0.00000
  510   32 TYR  CE2  -43.82590  10.26591 -15.93423 1S   50     1.00000
  511   32 TYR  HE2  -43.10231  10.50523 -16.69990 1S   50     0.00000
  512   32 TYR  C    -42.88002   8.54344 -12.07662 1S   50     1.00000
  513   32 TYR  O    -43.24711   7.54060 -12.68418 1S   50     1.00000
  514   33 ASN  N    -41.58837   8.92840 -12.05992 1S   51     1.00000
  515   33 ASN  HN   -41.29098   9.71358 -11.51910 1S   51     0.00000
  516   33 ASN  CA   -40.57987   8.31421 -12.89463 1S   51     1.00000
  517   33 ASN  HA   -41.00808   8.16487 -13.87795 1S   51     0.00000
  518   33 ASN  CB   -39.32151   9.21199 -13.01079 1S   51     1.00000
  519   33 ASN  HB1  -38.42116   8.60520 -13.24267 1S   51     0.00000
  520   33 ASN  HB2  -39.14208   9.75277 -12.05877 1S   51     0.00000
  521   33 ASN  CG   -39.49023  10.19231 -14.17875 1S   51     1.00000
  522   33 ASN  OD1  -39.16969   9.84836 -15.32085 1S   51     1.00000
  523   33 ASN  ND2  -39.99635  11.42640 -13.89768 1S   51     1.00000
  524   33 ASN  HD21 -40.25986  11.65841 -12.95802 1S   51     0.00000
  525   33 ASN  HD22 -40.11786  12.08481 -14.63579 1S   51     0.00000
  526   33 ASN  C    -40.17926   6.94093 -12.40605 1S   51     1.00000
  527   33 ASN  O    -39.57972   6.17588 -13.15690 1S   51     1.00000
  528   34 THR  N    -40.52242   6.58376 -11.15108 1S   52     1.00000
  529   34 THR  HN   -40.99743   7.22163 -10.54862 1S   52     0.00000
  530   34 THR  CA   -40.23906   5.28197 -10.59053 1S   52     1.00000
  531   34 THR  HA   -39.54906   4.74848 -11.22938 1S   52     0.00000
  532   34 THR  CB   -39.59871   5.38018  -9.21333 1S   52     1.00000
  533   34 THR  HB   -39.48886   4.36641  -8.77367 1S   52     0.00000
  534   34 THR  OG1  -40.36282   6.16393  -8.30308 1S   52     1.00000
  535   34 THR  HG1  -40.25121   7.07836  -8.58391 1S   52     0.00000
  536   34 THR  CG2  -38.19384   5.99618  -9.36079 1S   52     1.00000
  537   34 THR  HG21 -38.24913   7.03374  -9.75230 1S   52     0.00000
  538   34 THR  HG22 -37.58007   5.39004 -10.05962 1S   52     0.00000
  539   34 THR  HG23 -37.68277   6.01633  -8.37717 1S   52     0.00000
  540   34 THR  C    -41.49639   4.44647 -10.51668 1S   52     1.00000
  541   34 THR  O    -41.43058   3.28353 -10.12731 1S   52     1.00000
  542   35 ASN  N    -42.66835   5.01526 -10.88140 1S   53     1.00000
  543   35 ASN  HN   -42.70262   5.92901 -11.28167 1S   53     0.00000
  544   35 ASN  CA   -43.94233   4.37703 -10.65637 1S   53     1.00000
  545   35 ASN  HA   -43.88354   3.34769 -10.98511 1S   53     0.00000
  546   35 ASN  CB   -44.33970   4.46184  -9.15280 1S   53     1.00000
  547   35 ASN  HB1  -44.46376   5.51890  -8.85063 1S   53     0.00000
  548   35 ASN  HB2  -43.51055   4.03763  -8.54581 1S   53     0.00000
  549   35 ASN  CG   -45.61825   3.69690  -8.79880 1S   53     1.00000
  550   35 ASN  OD1  -46.18280   2.95250  -9.60489 1S   53     1.00000
  551   35 ASN  ND2  -46.07439   3.90417  -7.52647 1S   53     1.00000
  552   35 ASN  HD21 -46.90480   3.44596  -7.21811 1S   53     0.00000
  553   35 ASN  HD22 -45.56532   4.50502  -6.90931 1S   53     0.00000
  554   35 ASN  C    -44.92721   5.11818 -11.52983 1S   53     1.00000
  555   35 ASN  O    -45.55461   6.08529 -11.10478 1S   53     1.00000
  556   36 ILE  N    -45.07026   4.68420 -12.80186 1S   54     1.00000
  557   36 ILE  HN   -44.56111   3.88820 -13.12679 1S   54     0.00000
  558   36 ILE  CA   -45.85654   5.37012 -13.80531 1S   54     1.00000
  559   36 ILE  HA   -45.72731   6.43592 -13.67021 1S   54     0.00000
  560   36 ILE  CB   -45.41480   5.00772 -15.22345 1S   54     1.00000
  561   36 ILE  HB   -45.50267   3.90533 -15.35745 1S   54     0.00000
  562   36 ILE  CG2  -46.31613   5.68641 -16.28272 1S   54     1.00000
  563   36 ILE  HG21 -46.24412   6.78570 -16.19766 1S   54     0.00000
  564   36 ILE  HG22 -47.37782   5.38683 -16.17125 1S   54     0.00000
  565   36 ILE  HG23 -46.00090   5.39943 -17.30713 1S   54     0.00000
  566   36 ILE  CG1  -43.92280   5.38241 -15.41553 1S   54     1.00000
  567   36 ILE  HG11 -43.30669   4.82943 -14.67470 1S   54     0.00000
  568   36 ILE  HG12 -43.78625   6.46816 -15.21586 1S   54     0.00000
  569   36 ILE  CD   -43.38973   5.05418 -16.81249 1S   54     1.00000
  570   36 ILE  HD1  -43.70868   5.82923 -17.54223 1S   54     0.00000
  571   36 ILE  HD2  -43.76547   4.06582 -17.15099 1S   54     0.00000
  572   36 ILE  HD3  -42.28152   5.01478 -16.80335 1S   54     0.00000
  573   36 ILE  C    -47.31026   5.02642 -13.59141 1S   54     1.00000
  574   36 ILE  O    -47.75259   3.92197 -13.90566 1S   54     1.00000
  575   37 THR  N    -48.08070   5.98511 -13.02341 1S   55     1.00000
  576   37 THR  HN   -47.69765   6.86644 -12.75780 1S   55     0.00000
  577   37 THR  CA   -49.49899   5.83227 -12.78180 1S   55     1.00000
  578   37 THR  HA   -49.88510   5.05099 -13.42167 1S   55     0.00000
  579   37 THR  CB   -49.87681   5.52291 -11.32676 1S   55     1.00000
  580   37 THR  HB   -50.96318   5.28843 -11.27257 1S   55     0.00000
  581   37 THR  OG1  -49.62090   6.60580 -10.44014 1S   55     1.00000
  582   37 THR  HG1  -49.90050   6.31325  -9.56873 1S   55     0.00000
  583   37 THR  CG2  -49.07684   4.30505 -10.83161 1S   55     1.00000
  584   37 THR  HG21 -47.99529   4.54923 -10.75859 1S   55     0.00000
  585   37 THR  HG22 -49.19840   3.45111 -11.53008 1S   55     0.00000
  586   37 THR  HG23 -49.42745   3.99305  -9.82544 1S   55     0.00000
  587   37 THR  C    -50.13248   7.12711 -13.20700 1S   55     1.00000
  588   37 THR  O    -49.45383   8.14685 -13.27479 1S   55     1.00000
  589   38 GLU  N    -51.46245   7.12436 -13.46236 1S   56     1.00000
  590   38 GLU  HN   -51.99549   6.28433 -13.40966 1S   56     0.00000
  591   38 GLU  CA   -52.20823   8.30656 -13.84643 1S   56     1.00000
  592   38 GLU  HA   -51.67654   8.77707 -14.66225 1S   56     0.00000
  593   38 GLU  CB   -53.64262   7.95754 -14.30968 1S   56     1.00000
  594   38 GLU  HB1  -54.14784   7.36053 -13.51882 1S   56     0.00000
  595   38 GLU  HB2  -53.56370   7.31120 -15.21232 1S   56     0.00000
  596   38 GLU  CG   -54.54569   9.16540 -14.65384 1S   56     1.00000
  597   38 GLU  HG1  -54.78487   9.73401 -13.72968 1S   56     0.00000
  598   38 GLU  HG2  -55.50006   8.79624 -15.08436 1S   56     0.00000
  599   38 GLU  CD   -53.88576  10.11077 -15.66145 1S   56     1.00000
  600   38 GLU  OE1  -53.26313   9.61212 -16.63603 1S   56     1.00000
  601   38 GLU  OE2  -54.00318  11.34984 -15.46427 1S   56     1.00000
  602   38 GLU  C    -52.28368   9.29653 -12.71365 1S   56     1.00000
  603   38 GLU  O    -52.14647  10.50120 -12.92407 1S   56     1.00000
  604   39 GLU  N    -52.44725   8.80104 -11.46269 1S   57     1.00000
  605   39 GLU  HN   -52.57331   7.82497 -11.30797 1S   57     0.00000
  606   39 GLU  CA   -52.40338   9.62210 -10.27380 1S   57     1.00000
  607   39 GLU  HA   -53.18466  10.36462 -10.36353 1S   57     0.00000
  608   39 GLU  CB   -52.65062   8.80135  -8.98054 1S   57     1.00000
  609   39 GLU  HB1  -51.96423   7.92682  -8.97068 1S   57     0.00000
  610   39 GLU  HB2  -53.69348   8.41394  -9.00792 1S   57     0.00000
  611   39 GLU  CG   -52.45308   9.61008  -7.67976 1S   57     1.00000
  612   39 GLU  HG1  -53.11019  10.50566  -7.68527 1S   57     0.00000
  613   39 GLU  HG2  -51.39551   9.93975  -7.61861 1S   57     0.00000
  614   39 GLU  CD   -52.72526   8.78634  -6.42286 1S   57     1.00000
  615   39 GLU  OE1  -53.25054   9.37763  -5.44213 1S   57     1.00000
  616   39 GLU  OE2  -52.38405   7.57452  -6.41458 1S   57     1.00000
  617   39 GLU  C    -51.08047  10.35385 -10.18196 1S   57     1.00000
  618   39 GLU  O    -51.05762  11.54640  -9.90667 1S   57     1.00000
  619   40 ASN  N    -49.94332   9.68028 -10.46292 1S   58     1.00000
  620   40 ASN  HN   -49.96372   8.72330 -10.74838 1S   58     0.00000
  621   40 ASN  CA   -48.62912  10.27091 -10.32466 1S   58     1.00000
  622   40 ASN  HA   -48.61963  10.82429  -9.39530 1S   58     0.00000
  623   40 ASN  CB   -47.50631   9.21153 -10.30077 1S   58     1.00000
  624   40 ASN  HB1  -46.52001   9.69818 -10.44206 1S   58     0.00000
  625   40 ASN  HB2  -47.66517   8.47307 -11.11449 1S   58     0.00000
  626   40 ASN  CG   -47.47844   8.52176  -8.93154 1S   58     1.00000
  627   40 ASN  OD1  -47.78582   9.13377  -7.90366 1S   58     1.00000
  628   40 ASN  ND2  -47.07466   7.21900  -8.91472 1S   58     1.00000
  629   40 ASN  HD21 -46.78505   6.77616  -9.76732 1S   58     0.00000
  630   40 ASN  HD22 -47.07447   6.71508  -8.05577 1S   58     0.00000
  631   40 ASN  C    -48.31150  11.28941 -11.39138 1S   58     1.00000
  632   40 ASN  O    -47.59213  12.24377 -11.10472 1S   58     1.00000
  633   41 VAL  N    -48.87308  11.15950 -12.62274 1S   59     1.00000
  634   41 VAL  HN   -49.40742  10.35081 -12.86140 1S   59     0.00000
  635   41 VAL  CA   -48.79669  12.18486 -13.65611 1S   59     1.00000
  636   41 VAL  HA   -47.74976  12.37599 -13.85049 1S   59     0.00000
  637   41 VAL  CB   -49.49411  11.79762 -14.96534 1S   59     1.00000
  638   41 VAL  HB   -50.58340  11.65592 -14.78154 1S   59     0.00000
  639   41 VAL  CG1  -49.29258  12.88741 -16.03635 1S   59     1.00000
  640   41 VAL  HG11 -48.21807  13.16226 -16.11137 1S   59     0.00000
  641   41 VAL  HG12 -49.88704  13.78629 -15.79175 1S   59     0.00000
  642   41 VAL  HG13 -49.62690  12.51354 -17.02754 1S   59     0.00000
  643   41 VAL  CG2  -48.93217  10.48523 -15.52681 1S   59     1.00000
  644   41 VAL  HG21 -48.77623   9.73010 -14.74201 1S   59     0.00000
  645   41 VAL  HG22 -47.95819  10.67880 -16.02194 1S   59     0.00000
  646   41 VAL  HG23 -49.62835  10.06598 -16.28460 1S   59     0.00000
  647   41 VAL  C    -49.43075  13.46067 -13.13409 1S   59     1.00000
  648   41 VAL  O    -48.89736  14.54987 -13.32466 1S   59     1.00000
  649   42 GLN  N    -50.56841  13.33360 -12.40839 1S   60     1.00000
  650   42 GLN  HN   -50.96285  12.43212 -12.23947 1S   60     0.00000
  651   42 GLN  CA   -51.29493  14.44480 -11.83795 1S   60     1.00000
  652   42 GLN  HA   -51.42849  15.15910 -12.63644 1S   60     0.00000
  653   42 GLN  CB   -52.68182  14.03249 -11.27588 1S   60     1.00000
  654   42 GLN  HB1  -52.96500  14.66913 -10.40820 1S   60     0.00000
  655   42 GLN  HB2  -52.63376  12.98779 -10.90703 1S   60     0.00000
  656   42 GLN  CG   -53.81719  14.11574 -12.31271 1S   60     1.00000
  657   42 GLN  HG1  -54.78131  13.83174 -11.84037 1S   60     0.00000
  658   42 GLN  HG2  -53.61516  13.41730 -13.15255 1S   60     0.00000
  659   42 GLN  CD   -53.91795  15.54294 -12.86354 1S   60     1.00000
  660   42 GLN  OE1  -53.70068  15.77416 -14.05730 1S   60     1.00000
  661   42 GLN  NE2  -54.22046  16.52231 -11.95991 1S   60     1.00000
  662   42 GLN  HE21 -54.21526  17.47665 -12.25177 1S   60     0.00000
  663   42 GLN  HE22 -54.41115  16.27997 -11.00931 1S   60     0.00000
  664   42 GLN  C    -50.52039  15.17121 -10.76727 1S   60     1.00000
  665   42 GLN  O    -50.36285  16.38494 -10.86509 1S   60     1.00000
  666   43 ASN  N    -49.99811  14.46367  -9.73283 1S   61     1.00000
  667   43 ASN  HN   -50.15323  13.48026  -9.66099 1S   61     0.00000
  668   43 ASN  CA   -49.22686  15.07359  -8.65623 1S   61     1.00000
  669   43 ASN  HA   -49.85149  15.82653  -8.19361 1S   61     0.00000
  670   43 ASN  CB   -48.72749  14.07888  -7.57513 1S   61     1.00000
  671   43 ASN  HB1  -48.12473  14.62563  -6.81494 1S   61     0.00000
  672   43 ASN  HB2  -48.08183  13.29974  -8.03314 1S   61     0.00000
  673   43 ASN  CG   -49.88895  13.41881  -6.82680 1S   61     1.00000
  674   43 ASN  OD1  -50.33443  13.89767  -5.78080 1S   61     1.00000
  675   43 ASN  ND2  -50.36808  12.26988  -7.36621 1S   61     1.00000
  676   43 ASN  HD21 -51.10282  11.77191  -6.90982 1S   61     0.00000
  677   43 ASN  HD22 -50.04952  11.96640  -8.26728 1S   61     0.00000
  678   43 ASN  C    -47.98524  15.75676  -9.18146 1S   61     1.00000
  679   43 ASN  O    -47.60359  16.81886  -8.69293 1S   61     1.00000
  680   44 MET  N    -47.34786  15.16097 -10.21802 1S   62     1.00000
  681   44 MET  HN   -47.68079  14.29648 -10.59198 1S   62     0.00000
  682   44 MET  CA   -46.17448  15.69773 -10.86632 1S   62     1.00000
  683   44 MET  HA   -45.43755  15.89704 -10.10323 1S   62     0.00000
  684   44 MET  CB   -45.57323  14.70486 -11.88634 1S   62     1.00000
  685   44 MET  HB1  -46.32969  14.45844 -12.66270 1S   62     0.00000
  686   44 MET  HB2  -45.32829  13.76165 -11.34751 1S   62     0.00000
  687   44 MET  CG   -44.29492  15.22558 -12.56578 1S   62     1.00000
  688   44 MET  HG1  -43.56505  15.47459 -11.76435 1S   62     0.00000
  689   44 MET  HG2  -44.52196  16.16981 -13.10428 1S   62     0.00000
  690   44 MET  SD   -43.55162  14.05635 -13.73549 1S   62     1.00000
  691   44 MET  CE   -42.19068  15.15073 -14.22766 1S   62     1.00000
  692   44 MET  HE1  -41.85356  15.77404 -13.37283 1S   62     0.00000
  693   44 MET  HE2  -42.49794  15.83765 -15.04378 1S   62     0.00000
  694   44 MET  HE3  -41.31953  14.55859 -14.58172 1S   62     0.00000
  695   44 MET  C    -46.48041  16.99774 -11.56525 1S   62     1.00000
  696   44 MET  O    -45.71644  17.95498 -11.45614 1S   62     1.00000
  697   45 ASN  N    -47.62483  17.06877 -12.28277 1S   63     1.00000
  698   45 ASN  HN   -48.24090  16.28535 -12.35163 1S   63     0.00000
  699   45 ASN  CA   -48.02650  18.24740 -13.01645 1S   63     1.00000
  700   45 ASN  HA   -47.17261  18.59199 -13.58480 1S   63     0.00000
  701   45 ASN  CB   -49.22242  17.99062 -13.96371 1S   63     1.00000
  702   45 ASN  HB1  -49.63255  18.95079 -14.34714 1S   63     0.00000
  703   45 ASN  HB2  -50.02637  17.45169 -13.41881 1S   63     0.00000
  704   45 ASN  CG   -48.74893  17.17726 -15.17216 1S   63     1.00000
  705   45 ASN  OD1  -47.62562  17.34030 -15.66013 1S   63     1.00000
  706   45 ASN  ND2  -49.64770  16.28711 -15.68122 1S   63     1.00000
  707   45 ASN  HD21 -49.38236  15.71678 -16.45464 1S   63     0.00000
  708   45 ASN  HD22 -50.52722  16.14948 -15.22501 1S   63     0.00000
  709   45 ASN  C    -48.39660  19.36826 -12.08700 1S   63     1.00000
  710   45 ASN  O    -48.02054  20.50599 -12.33930 1S   63     1.00000
  711   46 ASN  N    -49.11047  19.08078 -10.97453 1S   64     1.00000
  712   46 ASN  HN   -49.40925  18.14718 -10.78198 1S   64     0.00000
  713   46 ASN  CA   -49.55146  20.09518 -10.03896 1S   64     1.00000
  714   46 ASN  HA   -50.04534  20.87190 -10.60930 1S   64     0.00000
  715   46 ASN  CB   -50.52524  19.55707  -8.96205 1S   64     1.00000
  716   46 ASN  HB1  -50.84755  20.38829  -8.29736 1S   64     0.00000
  717   46 ASN  HB2  -50.01858  18.78236  -8.34781 1S   64     0.00000
  718   46 ASN  CG   -51.77734  18.95980  -9.61697 1S   64     1.00000
  719   46 ASN  OD1  -52.19437  19.35267 -10.71088 1S   64     1.00000
  720   46 ASN  ND2  -52.40090  17.97498  -8.90316 1S   64     1.00000
  721   46 ASN  HD21 -53.21583  17.54168  -9.27757 1S   64     0.00000
  722   46 ASN  HD22 -52.03196  17.69238  -8.01745 1S   64     0.00000
  723   46 ASN  C    -48.37763  20.72784  -9.33101 1S   64     1.00000
  724   46 ASN  O    -48.28203  21.94860  -9.27554 1S   64     1.00000
  725   47 ALA  N    -47.43186  19.91523  -8.80257 1S   65     1.00000
  726   47 ALA  HN   -47.51125  18.92123  -8.86275 1S   65     0.00000
  727   47 ALA  CA   -46.26148  20.40634  -8.10338 1S   65     1.00000
  728   47 ALA  HA   -46.59868  21.10523  -7.35012 1S   65     0.00000
  729   47 ALA  CB   -45.50002  19.26581  -7.40467 1S   65     1.00000
  730   47 ALA  HB1  -45.15725  18.50907  -8.14209 1S   65     0.00000
  731   47 ALA  HB2  -46.16652  18.76112  -6.67295 1S   65     0.00000
  732   47 ALA  HB3  -44.61895  19.65774  -6.85297 1S   65     0.00000
  733   47 ALA  C    -45.31135  21.14295  -9.02521 1S   65     1.00000
  734   47 ALA  O    -44.66399  22.10456  -8.61312 1S   65     1.00000
  735   48 GLY  N    -45.24475  20.73143 -10.31430 1S   66     1.00000
  736   48 GLY  HN   -45.75168  19.92798 -10.62340 1S   66     0.00000
  737   48 GLY  CA   -44.46599  21.40157 -11.33337 1S   66     1.00000
  738   48 GLY  HA1  -44.46322  20.75966 -12.20162 1S   66     0.00000
  739   48 GLY  HA2  -43.47776  21.58584 -10.93815 1S   66     0.00000
  740   48 GLY  C    -45.06551  22.72301 -11.72961 1S   66     1.00000
  741   48 GLY  O    -44.33717  23.66582 -12.02735 1S   66     1.00000
  742   49 ASP  N    -46.41497  22.82787 -11.72692 1S   67     1.00000
  743   49 ASP  HN   -46.98577  22.03010 -11.53755 1S   67     0.00000
  744   49 ASP  CA   -47.14864  24.03974 -12.02845 1S   67     1.00000
  745   49 ASP  HA   -46.73523  24.46792 -12.93161 1S   67     0.00000
  746   49 ASP  CB   -48.67191  23.79361 -12.20404 1S   67     1.00000
  747   49 ASP  HB1  -49.23575  24.74986 -12.14880 1S   67     0.00000
  748   49 ASP  HB2  -49.03677  23.12587 -11.39617 1S   67     0.00000
  749   49 ASP  CG   -48.99622  23.15313 -13.55690 1S   67     1.00000
  750   49 ASP  OD1  -48.10176  23.09994 -14.44161 1S   67     1.00000
  751   49 ASP  OD2  -50.16882  22.72181 -13.72080 1S   67     1.00000
  752   49 ASP  C    -46.95639  25.05904 -10.93677 1S   67     1.00000
  753   49 ASP  O    -46.75124  26.23213 -11.23220 1S   67     1.00000
  754   50 LYS  N    -46.97495  24.63693  -9.64840 1S   68     1.00000
  755   50 LYS  HN   -47.19708  23.68830  -9.42762 1S   68     0.00000
  756   50 LYS  CA   -46.69234  25.50008  -8.51685 1S   68     1.00000
  757   50 LYS  HA   -47.39470  26.32164  -8.55150 1S   68     0.00000
  758   50 LYS  CB   -46.83918  24.77923  -7.15632 1S   68     1.00000
  759   50 LYS  HB1  -46.54881  25.47771  -6.33874 1S   68     0.00000
  760   50 LYS  HB2  -46.15703  23.90157  -7.11776 1S   68     0.00000
  761   50 LYS  CG   -48.27481  24.31235  -6.88097 1S   68     1.00000
  762   50 LYS  HG1  -48.54387  23.50978  -7.59375 1S   68     0.00000
  763   50 LYS  HG2  -48.97268  25.16107  -7.05554 1S   68     0.00000
  764   50 LYS  CD   -48.48702  23.78676  -5.45475 1S   68     1.00000
  765   50 LYS  HD1  -48.33816  24.63514  -4.74986 1S   68     0.00000
  766   50 LYS  HD2  -47.72150  23.01114  -5.22991 1S   68     0.00000
  767   50 LYS  CE   -49.88755  23.18785  -5.27073 1S   68     1.00000
  768   50 LYS  HE1  -49.97662  22.23300  -5.83143 1S   68     0.00000
  769   50 LYS  HE2  -50.66032  23.89800  -5.63489 1S   68     0.00000
  770   50 LYS  NZ   -50.17159  22.91172  -3.84387 1S   68     1.00000
  771   50 LYS  HZ1  -50.12487  23.80143  -3.30686 1S   68     0.00000
  772   50 LYS  HZ2  -49.46950  22.24325  -3.46819 1S   68     0.00000
  773   50 LYS  HZ3  -51.12417  22.50402  -3.75247 1S   68     0.00000
  774   50 LYS  C    -45.29709  26.07905  -8.58679 1S   68     1.00000
  775   50 LYS  O    -45.10540  27.26516  -8.33292 1S   68     1.00000
  776   51 TRP  N    -44.29658  25.25285  -8.97144 1S   69     1.00000
  777   51 TRP  HN   -44.48107  24.29080  -9.16502 1S   69     0.00000
  778   51 TRP  CA   -42.91767  25.66249  -9.13126 1S   69     1.00000
  779   51 TRP  HA   -42.62694  26.18955  -8.23297 1S   69     0.00000
  780   51 TRP  CB   -41.99760  24.42038  -9.29533 1S   69     1.00000
  781   51 TRP  HB1  -42.46678  23.73374 -10.03343 1S   69     0.00000
  782   51 TRP  HB2  -41.96947  23.88684  -8.31954 1S   69     0.00000
  783   51 TRP  CG   -40.56152  24.66811  -9.73863 1S   69     1.00000
  784   51 TRP  CD1  -39.97958  24.27807 -10.91143 1S   69     1.00000
  785   51 TRP  HD1  -40.48082  23.71700 -11.68653 1S   69     0.00000
  786   51 TRP  NE1  -38.68049  24.72119 -10.97237 1S   69     1.00000
  787   51 TRP  HE1  -38.06646  24.58746 -11.72064 1S   69     0.00000
  788   51 TRP  CE2  -38.40151  25.43078  -9.82770 1S   69     1.00000
  789   51 TRP  CD2  -39.56507  25.42830  -9.02618 1S   69     1.00000
  790   51 TRP  CE3  -39.59413  26.08948  -7.80634 1S   69     1.00000
  791   51 TRP  HE3  -40.47645  26.12066  -7.19162 1S   69     0.00000
  792   51 TRP  CZ3  -38.43138  26.75291  -7.39229 1S   69     1.00000
  793   51 TRP  HZ3  -38.43480  27.27955  -6.45536 1S   69     0.00000
  794   51 TRP  CZ2  -37.24681  26.08746  -9.41056 1S   69     1.00000
  795   51 TRP  HZ2  -36.35111  26.09900 -10.01329 1S   69     0.00000
  796   51 TRP  CH2  -37.27484  26.75611  -8.18203 1S   69     1.00000
  797   51 TRP  HH2  -36.39723  27.28471  -7.84034 1S   69     0.00000
  798   51 TRP  C    -42.75424  26.62497 -10.29521 1S   69     1.00000
  799   51 TRP  O    -42.05107  27.62541 -10.17175 1S   69     1.00000
  800   52 SER  N    -43.41629  26.36046 -11.44588 1S   70     1.00000
  801   52 SER  HN   -43.95622  25.52500 -11.54215 1S   70     0.00000
  802   52 SER  CA   -43.38331  27.22029 -12.61559 1S   70     1.00000
  803   52 SER  HA   -42.34636  27.39505 -12.86985 1S   70     0.00000
  804   52 SER  CB   -44.10713  26.59755 -13.83453 1S   70     1.00000
  805   52 SER  HB1  -44.24504  27.35536 -14.63586 1S   70     0.00000
  806   52 SER  HB2  -45.10526  26.21136 -13.53552 1S   70     0.00000
  807   52 SER  OG   -43.34292  25.53159 -14.38562 1S   70     1.00000
  808   52 SER  HG1  -43.64810  24.72614 -13.95826 1S   70     0.00000
  809   52 SER  C    -44.01717  28.56509 -12.33699 1S   70     1.00000
  810   52 SER  O    -43.50092  29.59615 -12.76436 1S   70     1.00000
  811   53 ALA  N    -45.14229  28.58379 -11.58459 1S   71     1.00000
  812   53 ALA  HN   -45.55366  27.73085 -11.26363 1S   71     0.00000
  813   53 ALA  CA   -45.85570  29.78457 -11.20844 1S   71     1.00000
  814   53 ALA  HA   -46.03271  30.35996 -12.10643 1S   71     0.00000
  815   53 ALA  CB   -47.20444  29.46531 -10.53805 1S   71     1.00000
  816   53 ALA  HB1  -47.05953  28.84293  -9.62939 1S   71     0.00000
  817   53 ALA  HB2  -47.85078  28.90194 -11.24437 1S   71     0.00000
  818   53 ALA  HB3  -47.73504  30.39899 -10.25237 1S   71     0.00000
  819   53 ALA  C    -45.04538  30.62995 -10.26080 1S   71     1.00000
  820   53 ALA  O    -44.98172  31.84819 -10.41561 1S   71     1.00000
  821   54 PHE  N    -44.36597  29.98485  -9.28120 1S   72     1.00000
  822   54 PHE  HN   -44.46289  28.99695  -9.16554 1S   72     0.00000
  823   54 PHE  CA   -43.45298  30.61575  -8.35301 1S   72     1.00000
  824   54 PHE  HA   -44.00970  31.35808  -7.79809 1S   72     0.00000
  825   54 PHE  CB   -42.87205  29.56968  -7.36146 1S   72     1.00000
  826   54 PHE  HB1  -42.49529  28.68852  -7.92211 1S   72     0.00000
  827   54 PHE  HB2  -43.68771  29.22121  -6.69262 1S   72     0.00000
  828   54 PHE  CG   -41.75297  30.09207  -6.49190 1S   72     1.00000
  829   54 PHE  CD1  -41.98355  31.05234  -5.49228 1S   72     1.00000
  830   54 PHE  HD1  -42.98327  31.42345  -5.32318 1S   72     0.00000
  831   54 PHE  CE1  -40.92126  31.53762  -4.71782 1S   72     1.00000
  832   54 PHE  HE1  -41.10230  32.28380  -3.95832 1S   72     0.00000
  833   54 PHE  CZ   -39.61812  31.07604  -4.94781 1S   72     1.00000
  834   54 PHE  HZ   -38.79256  31.46568  -4.37000 1S   72     0.00000
  835   54 PHE  CD2  -40.44298  29.63824  -6.71177 1S   72     1.00000
  836   54 PHE  HD2  -40.25261  28.91644  -7.49154 1S   72     0.00000
  837   54 PHE  CE2  -39.38128  30.13125  -5.95074 1S   72     1.00000
  838   54 PHE  HE2  -38.37938  29.78765  -6.15030 1S   72     0.00000
  839   54 PHE  C    -42.34809  31.32709  -9.09897 1S   72     1.00000
  840   54 PHE  O    -42.03516  32.46873  -8.78451 1S   72     1.00000
  841   55 LEU  N    -41.75313  30.68085 -10.12319 1S   73     1.00000
  842   55 LEU  HN   -42.03611  29.76107 -10.39012 1S   73     0.00000
  843   55 LEU  CA   -40.65193  31.24433 -10.86508 1S   73     1.00000
  844   55 LEU  HA   -39.93269  31.60671 -10.14688 1S   73     0.00000
  845   55 LEU  CB   -39.99631  30.21697 -11.80392 1S   73     1.00000
  846   55 LEU  HB1  -39.42916  30.72871 -12.61520 1S   73     0.00000
  847   55 LEU  HB2  -40.79337  29.60833 -12.28533 1S   73     0.00000
  848   55 LEU  CG   -39.00062  29.28676 -11.08758 1S   73     1.00000
  849   55 LEU  HG   -39.52142  28.79287 -10.23492 1S   73     0.00000
  850   55 LEU  CD1  -38.54289  28.19210 -12.06226 1S   73     1.00000
  851   55 LEU  HD11 -38.05712  28.64924 -12.95011 1S   73     0.00000
  852   55 LEU  HD12 -39.41428  27.59156 -12.40024 1S   73     0.00000
  853   55 LEU  HD13 -37.81331  27.51731 -11.57333 1S   73     0.00000
  854   55 LEU  CD2  -37.79583  30.06909 -10.52677 1S   73     1.00000
  855   55 LEU  HD21 -38.10707  30.73932  -9.70000 1S   73     0.00000
  856   55 LEU  HD22 -37.33713  30.68876 -11.32678 1S   73     0.00000
  857   55 LEU  HD23 -37.02828  29.37157 -10.13283 1S   73     0.00000
  858   55 LEU  C    -41.04298  32.42924 -11.69301 1S   73     1.00000
  859   55 LEU  O    -40.28374  33.38788 -11.76032 1S   73     1.00000
  860   56 LYS  N    -42.23188  32.41305 -12.33114 1S   74     1.00000
  861   56 LYS  HN   -42.82785  31.61254 -12.29670 1S   74     0.00000
  862   56 LYS  CA   -42.70486  33.52582 -13.12296 1S   74     1.00000
  863   56 LYS  HA   -41.93231  33.76736 -13.84073 1S   74     0.00000
  864   56 LYS  CB   -43.99132  33.16007 -13.88238 1S   74     1.00000
  865   56 LYS  HB1  -44.83584  33.01812 -13.17314 1S   74     0.00000
  866   56 LYS  HB2  -43.80182  32.17840 -14.36879 1S   74     0.00000
  867   56 LYS  CG   -44.38033  34.19063 -14.95504 1S   74     1.00000
  868   56 LYS  HG1  -43.48364  34.43786 -15.56461 1S   74     0.00000
  869   56 LYS  HG2  -44.70522  35.13048 -14.45493 1S   74     0.00000
  870   56 LYS  CD   -45.51043  33.70827 -15.87987 1S   74     1.00000
  871   56 LYS  HD1  -45.77312  34.53361 -16.57881 1S   74     0.00000
  872   56 LYS  HD2  -46.40896  33.49606 -15.25839 1S   74     0.00000
  873   56 LYS  CE   -45.16844  32.45094 -16.69614 1S   74     1.00000
  874   56 LYS  HE1  -45.99665  32.20449 -17.39259 1S   74     0.00000
  875   56 LYS  HE2  -44.99428  31.58005 -16.03014 1S   74     0.00000
  876   56 LYS  NZ   -43.94026  32.65536 -17.50111 1S   74     1.00000
  877   56 LYS  HZ1  -43.15525  32.90960 -16.86721 1S   74     0.00000
  878   56 LYS  HZ2  -44.09677  33.42609 -18.18076 1S   74     0.00000
  879   56 LYS  HZ3  -43.70399  31.78052 -18.01073 1S   74     0.00000
  880   56 LYS  C    -42.95702  34.74314 -12.26931 1S   74     1.00000
  881   56 LYS  O    -42.57572  35.85255 -12.63515 1S   74     1.00000
  882   57 GLU  N    -43.56258  34.54364 -11.07618 1S   75     1.00000
  883   57 GLU  HN   -43.87209  33.63335 -10.80511 1S   75     0.00000
  884   57 GLU  CA   -43.79905  35.59181 -10.10936 1S   75     1.00000
  885   57 GLU  HA   -44.33080  36.38287 -10.61823 1S   75     0.00000
  886   57 GLU  CB   -44.66333  35.08004  -8.92702 1S   75     1.00000
  887   57 GLU  HB1  -44.23623  34.11735  -8.56765 1S   75     0.00000
  888   57 GLU  HB2  -45.68405  34.86022  -9.31161 1S   75     0.00000
  889   57 GLU  CG   -44.78232  36.02409  -7.70626 1S   75     1.00000
  890   57 GLU  HG1  -43.77584  36.19382  -7.26856 1S   75     0.00000
  891   57 GLU  HG2  -45.40591  35.53265  -6.92913 1S   75     0.00000
  892   57 GLU  CD   -45.40976  37.38526  -8.02979 1S   75     1.00000
  893   57 GLU  OE1  -45.94608  37.57467  -9.15273 1S   75     1.00000
  894   57 GLU  OE2  -45.36230  38.26069  -7.12421 1S   75     1.00000
  895   57 GLU  C    -42.50048  36.17410  -9.59590 1S   75     1.00000
  896   57 GLU  O    -42.35192  37.39145  -9.51030 1S   75     1.00000
  897   58 GLN  N    -41.50710  35.31628  -9.27459 1S   76     1.00000
  898   58 GLN  HN   -41.63316  34.32745  -9.34849 1S   76     0.00000
  899   58 GLN  CA   -40.22561  35.75045  -8.76727 1S   76     1.00000
  900   58 GLN  HA   -40.40454  36.49203  -8.00198 1S   76     0.00000
  901   58 GLN  CB   -39.42489  34.59108  -8.14652 1S   76     1.00000
  902   58 GLN  HB1  -38.39268  34.92526  -7.90406 1S   76     0.00000
  903   58 GLN  HB2  -39.34680  33.76622  -8.89042 1S   76     0.00000
  904   58 GLN  CG   -40.05801  34.03386  -6.86046 1S   76     1.00000
  905   58 GLN  HG1  -39.50827  33.11420  -6.57819 1S   76     0.00000
  906   58 GLN  HG2  -41.11644  33.75758  -7.03068 1S   76     0.00000
  907   58 GLN  CD   -39.95666  35.03363  -5.70348 1S   76     1.00000
  908   58 GLN  OE1  -38.86583  35.48622  -5.34380 1S   76     1.00000
  909   58 GLN  NE2  -41.13280  35.36911  -5.09493 1S   76     1.00000
  910   58 GLN  HE21 -41.12559  36.01172  -4.33335 1S   76     0.00000
  911   58 GLN  HE22 -41.99005  34.96384  -5.41398 1S   76     0.00000
  912   58 GLN  C    -39.37222  36.39153  -9.83359 1S   76     1.00000
  913   58 GLN  O    -38.52817  37.22316  -9.52010 1S   76     1.00000
  914   59 SER  N    -39.58181  36.04557 -11.12403 1S   77     1.00000
  915   59 SER  HN   -40.24731  35.33741 -11.35586 1S   77     0.00000
  916   59 SER  CA   -38.87351  36.62406 -12.24727 1S   77     1.00000
  917   59 SER  HA   -37.81938  36.61312 -12.00886 1S   77     0.00000
  918   59 SER  CB   -39.10843  35.83211 -13.56095 1S   77     1.00000
  919   59 SER  HB1  -40.18336  35.84968 -13.83843 1S   77     0.00000
  920   59 SER  HB2  -38.80877  34.77380 -13.40162 1S   77     0.00000
  921   59 SER  OG   -38.33981  36.34691 -14.64456 1S   77     1.00000
  922   59 SER  HG1  -37.41996  36.15337 -14.42752 1S   77     0.00000
  923   59 SER  C    -39.30119  38.05742 -12.42946 1S   77     1.00000
  924   59 SER  O    -38.46037  38.94716 -12.53884 1S   77     1.00000
  925   60 THR  N    -40.63296  38.30356 -12.41311 1S   78     1.00000
  926   60 THR  HN   -41.28318  37.54626 -12.36849 1S   78     0.00000
  927   60 THR  CA   -41.24687  39.61786 -12.45820 1S   78     1.00000
  928   60 THR  HA   -40.95994  40.07771 -13.39421 1S   78     0.00000
  929   60 THR  CB   -42.76489  39.52506 -12.37720 1S   78     1.00000
  930   60 THR  HB   -43.06817  39.03155 -11.42716 1S   78     0.00000
  931   60 THR  OG1  -43.25479  38.73197 -13.45120 1S   78     1.00000
  932   60 THR  HG1  -44.14425  38.46916 -13.20207 1S   78     0.00000
  933   60 THR  CG2  -43.41696  40.92096 -12.45997 1S   78     1.00000
  934   60 THR  HG21 -43.11804  41.43328 -13.39881 1S   78     0.00000
  935   60 THR  HG22 -43.11920  41.55477 -11.59956 1S   78     0.00000
  936   60 THR  HG23 -44.52358  40.82912 -12.44185 1S   78     0.00000
  937   60 THR  C    -40.74076  40.48822 -11.32774 1S   78     1.00000
  938   60 THR  O    -40.30932  41.61748 -11.55205 1S   78     1.00000
  939   61 LEU  N    -40.74833  39.95560 -10.08294 1S   79     1.00000
  940   61 LEU  HN   -41.11416  39.03924  -9.92476 1S   79     0.00000
  941   61 LEU  CA   -40.26915  40.63975  -8.90022 1S   79     1.00000
  942   61 LEU  HA   -40.81581  41.56787  -8.82154 1S   79     0.00000
  943   61 LEU  CB   -40.48818  39.78540  -7.62989 1S   79     1.00000
  944   61 LEU  HB1  -39.71937  40.01096  -6.85817 1S   79     0.00000
  945   61 LEU  HB2  -40.37770  38.71417  -7.90387 1S   79     0.00000
  946   61 LEU  CG   -41.86215  40.00329  -6.96367 1S   79     1.00000
  947   61 LEU  HG   -42.64656  39.96804  -7.75485 1S   79     0.00000
  948   61 LEU  CD1  -42.16427  38.87265  -5.96402 1S   79     1.00000
  949   61 LEU  HD11 -41.38973  38.84203  -5.16925 1S   79     0.00000
  950   61 LEU  HD12 -42.17855  37.89310  -6.48733 1S   79     0.00000
  951   61 LEU  HD13 -43.15619  39.03283  -5.49058 1S   79     0.00000
  952   61 LEU  CD2  -41.92876  41.38065  -6.27416 1S   79     1.00000
  953   61 LEU  HD21 -41.77978  42.20123  -7.00598 1S   79     0.00000
  954   61 LEU  HD22 -41.13705  41.45549  -5.49827 1S   79     0.00000
  955   61 LEU  HD23 -42.91583  41.52231  -5.78680 1S   79     0.00000
  956   61 LEU  C    -38.80315  40.99537  -8.98201 1S   79     1.00000
  957   61 LEU  O    -38.40873  42.08747  -8.57854 1S   79     1.00000
  958   62 ALA  N    -37.96350  40.08691  -9.52763 1S   80     1.00000
  959   62 ALA  HN   -38.30272  39.20238  -9.84521 1S   80     0.00000
  960   62 ALA  CA   -36.53553  40.27264  -9.64322 1S   80     1.00000
  961   62 ALA  HA   -36.16472  40.53933  -8.66286 1S   80     0.00000
  962   62 ALA  CB   -35.83374  38.98348 -10.10973 1S   80     1.00000
  963   62 ALA  HB1  -36.12134  38.71861 -11.14859 1S   80     0.00000
  964   62 ALA  HB2  -36.12332  38.13928  -9.45043 1S   80     0.00000
  965   62 ALA  HB3  -34.73102  39.09197 -10.06109 1S   80     0.00000
  966   62 ALA  C    -36.17241  41.38026 -10.60317 1S   80     1.00000
  967   62 ALA  O    -35.15431  42.04373 -10.42448 1S   80     1.00000
  968   63 GLN  N    -37.01835  41.62796 -11.63201 1S   81     1.00000
  969   63 GLN  HN   -37.84620  41.08078 -11.74659 1S   81     0.00000
  970   63 GLN  CA   -36.80634  42.64319 -12.64633 1S   81     1.00000
  971   63 GLN  HA   -35.79104  42.55787 -13.00231 1S   81     0.00000
  972   63 GLN  CB   -37.75751  42.43820 -13.84649 1S   81     1.00000
  973   63 GLN  HB1  -37.80531  43.35087 -14.48188 1S   81     0.00000
  974   63 GLN  HB2  -38.77911  42.24369 -13.45280 1S   81     0.00000
  975   63 GLN  CG   -37.30008  41.27387 -14.73952 1S   81     1.00000
  976   63 GLN  HG1  -36.97831  40.42208 -14.10292 1S   81     0.00000
  977   63 GLN  HG2  -36.43704  41.59192 -15.36242 1S   81     0.00000
  978   63 GLN  CD   -38.44362  40.81697 -15.64425 1S   81     1.00000
  979   63 GLN  OE1  -39.37863  41.56154 -15.95462 1S   81     1.00000
  980   63 GLN  NE2  -38.35819  39.52516 -16.06817 1S   81     1.00000
  981   63 GLN  HE21 -37.52985  38.99290 -15.88091 1S   81     0.00000
  982   63 GLN  HE22 -39.09548  39.13498 -16.61343 1S   81     0.00000
  983   63 GLN  C    -36.96901  44.05202 -12.13032 1S   81     1.00000
  984   63 GLN  O    -36.60235  45.00221 -12.81887 1S   81     1.00000
  985   64 MET  N    -37.48817  44.22671 -10.89409 1S   82     1.00000
  986   64 MET  HN   -37.77978  43.44731 -10.34249 1S   82     0.00000
  987   64 MET  CA   -37.67111  45.52515 -10.28719 1S   82     1.00000
  988   64 MET  HA   -37.91195  46.24132 -11.06093 1S   82     0.00000
  989   64 MET  CB   -38.83069  45.50519  -9.26785 1S   82     1.00000
  990   64 MET  HB1  -38.90661  46.49193  -8.75828 1S   82     0.00000
  991   64 MET  HB2  -38.61796  44.73458  -8.49402 1S   82     0.00000
  992   64 MET  CG   -40.19689  45.20307  -9.91099 1S   82     1.00000
  993   64 MET  HG1  -40.11157  44.28138 -10.52601 1S   82     0.00000
  994   64 MET  HG2  -40.45445  46.03747 -10.60082 1S   82     0.00000
  995   64 MET  SD   -41.51438  44.98123  -8.67635 1S   82     1.00000
  996   64 MET  CE   -42.76873  44.29290  -9.79411 1S   82     1.00000
  997   64 MET  HE1  -42.40784  43.35338 -10.26461 1S   82     0.00000
  998   64 MET  HE2  -43.02384  45.00979 -10.60360 1S   82     0.00000
  999   64 MET  HE3  -43.70184  44.05861  -9.23781 1S   82     0.00000
 1000   64 MET  C    -36.41806  46.00827  -9.58391 1S   82     1.00000
 1001   64 MET  O    -36.42253  47.09449  -9.00748 1S   82     1.00000
 1002   65 TYR  N    -35.30758  45.23302  -9.62819 1S   83     1.00000
 1003   65 TYR  HN   -35.31439  44.34292 -10.07963 1S   83     0.00000
 1004   65 TYR  CA   -34.03074  45.65436  -9.09043 1S   83     1.00000
 1005   65 TYR  HA   -34.13102  46.60529  -8.59060 1S   83     0.00000
 1006   65 TYR  CB   -33.39720  44.65052  -8.09044 1S   83     1.00000
 1007   65 TYR  HB1  -32.45781  45.07335  -7.67068 1S   83     0.00000
 1008   65 TYR  HB2  -33.16250  43.68960  -8.59335 1S   83     0.00000
 1009   65 TYR  CG   -34.33023  44.33474  -6.95257 1S   83     1.00000
 1010   65 TYR  CD1  -35.31182  43.33751  -7.10008 1S   83     1.00000
 1011   65 TYR  HD1  -35.40226  42.81313  -8.03687 1S   83     0.00000
 1012   65 TYR  CE1  -36.18415  43.02254  -6.05340 1S   83     1.00000
 1013   65 TYR  HE1  -36.93513  42.25873  -6.19453 1S   83     0.00000
 1014   65 TYR  CZ   -36.08092  43.70384  -4.83670 1S   83     1.00000
 1015   65 TYR  OH   -36.96257  43.40370  -3.77660 1S   83     1.00000
 1016   65 TYR  HH   -37.58437  42.74331  -4.08959 1S   83     0.00000
 1017   65 TYR  CD2  -34.22951  45.00620  -5.72337 1S   83     1.00000
 1018   65 TYR  HD2  -33.47599  45.76717  -5.58091 1S   83     0.00000
 1019   65 TYR  CE2  -35.10834  44.69643  -4.67876 1S   83     1.00000
 1020   65 TYR  HE2  -35.05134  45.23853  -3.75480 1S   83     0.00000
 1021   65 TYR  C    -33.10342  45.75716 -10.28133 1S   83     1.00000
 1022   65 TYR  O    -32.81083  44.71945 -10.86822 1S   83     1.00000
 1023   66 PRO  N    -32.61464  46.90899 -10.72538 1S   84     1.00000
 1024   66 PRO  CD   -32.90745  48.22093 -10.15358 1S   84     1.00000
 1025   66 PRO  HD1  -32.68449  48.22901  -9.06738 1S   84     0.00000
 1026   66 PRO  HD2  -33.97876  48.45815 -10.32718 1S   84     0.00000
 1027   66 PRO  CA   -31.78553  46.99866 -11.91582 1S   84     1.00000
 1028   66 PRO  HA   -32.21352  46.40746 -12.71429 1S   84     0.00000
 1029   66 PRO  CB   -31.77508  48.49680 -12.25398 1S   84     1.00000
 1030   66 PRO  HB1  -32.63899  48.72047 -12.91895 1S   84     0.00000
 1031   66 PRO  HB2  -30.84394  48.83309 -12.75242 1S   84     0.00000
 1032   66 PRO  CG   -32.00255  49.19432 -10.90921 1S   84     1.00000
 1033   66 PRO  HG1  -31.03138  49.29022 -10.37555 1S   84     0.00000
 1034   66 PRO  HG2  -32.45880  50.19750 -11.02255 1S   84     0.00000
 1035   66 PRO  C    -30.39020  46.49563 -11.62689 1S   84     1.00000
 1036   66 PRO  O    -29.80247  46.87399 -10.61381 1S   84     1.00000
 1037   67 LEU  N    -29.83268  45.66018 -12.53805 1S   85     1.00000
 1038   67 LEU  HN   -30.35594  45.34301 -13.32459 1S   85     0.00000
 1039   67 LEU  CA   -28.48424  45.13774 -12.45001 1S   85     1.00000
 1040   67 LEU  HA   -28.37258  44.65154 -11.49244 1S   85     0.00000
 1041   67 LEU  CB   -28.14728  44.14966 -13.58709 1S   85     1.00000
 1042   67 LEU  HB1  -27.11696  43.76680 -13.43138 1S   85     0.00000
 1043   67 LEU  HB2  -28.16911  44.68803 -14.56133 1S   85     0.00000
 1044   67 LEU  CG   -29.06676  42.92125 -13.70535 1S   85     1.00000
 1045   67 LEU  HG   -30.11397  43.27669 -13.84103 1S   85     0.00000
 1046   67 LEU  CD1  -28.68566  42.11057 -14.95638 1S   85     1.00000
 1047   67 LEU  HD11 -27.64400  41.73466 -14.86779 1S   85     0.00000
 1048   67 LEU  HD12 -28.75701  42.74562 -15.86444 1S   85     0.00000
 1049   67 LEU  HD13 -29.36821  41.24350 -15.07601 1S   85     0.00000
 1050   67 LEU  CD2  -29.02517  42.03044 -12.45463 1S   85     1.00000
 1051   67 LEU  HD21 -29.37731  42.58272 -11.55871 1S   85     0.00000
 1052   67 LEU  HD22 -27.99419  41.66369 -12.26787 1S   85     0.00000
 1053   67 LEU  HD23 -29.68681  41.15169 -12.60786 1S   85     0.00000
 1054   67 LEU  C    -27.45841  46.23628 -12.55402 1S   85     1.00000
 1055   67 LEU  O    -26.35557  46.11469 -12.02807 1S   85     1.00000
 1056   68 GLN  N    -27.83053  47.35089 -13.22653 1S   86     1.00000
 1057   68 GLN  HN   -28.73742  47.39011 -13.63799 1S   86     0.00000
 1058   68 GLN  CA   -27.03726  48.54143 -13.42839 1S   86     1.00000
 1059   68 GLN  HA   -26.18036  48.25116 -14.01935 1S   86     0.00000
 1060   68 GLN  CB   -27.86849  49.57610 -14.23303 1S   86     1.00000
 1061   68 GLN  HB1  -28.76367  49.88151 -13.65179 1S   86     0.00000
 1062   68 GLN  HB2  -28.25303  49.03855 -15.13140 1S   86     0.00000
 1063   68 GLN  CG   -27.08318  50.79423 -14.76974 1S   86     1.00000
 1064   68 GLN  HG1  -27.46636  51.04691 -15.78296 1S   86     0.00000
 1065   68 GLN  HG2  -26.00822  50.53296 -14.86031 1S   86     0.00000
 1066   68 GLN  CD   -27.26118  52.04027 -13.89154 1S   86     1.00000
 1067   68 GLN  OE1  -28.27023  52.20589 -13.20150 1S   86     1.00000
 1068   68 GLN  NE2  -26.25976  52.96729 -13.95863 1S   86     1.00000
 1069   68 GLN  HE21 -26.33084  53.80094 -13.41650 1S   86     0.00000
 1070   68 GLN  HE22 -25.47575  52.81355 -14.55998 1S   86     0.00000
 1071   68 GLN  C    -26.52838  49.14117 -12.12891 1S   86     1.00000
 1072   68 GLN  O    -25.47496  49.77489 -12.11281 1S   86     1.00000
 1073   69 GLU  N    -27.25232  48.91800 -11.00361 1S   87     1.00000
 1074   69 GLU  HN   -28.09196  48.37936 -11.03389 1S   87     0.00000
 1075   69 GLU  CA   -26.90344  49.44468  -9.70277 1S   87     1.00000
 1076   69 GLU  HA   -26.05703  50.11141  -9.78961 1S   87     0.00000
 1077   69 GLU  CB   -28.09382  50.24418  -9.12137 1S   87     1.00000
 1078   69 GLU  HB1  -27.86051  50.59867  -8.09349 1S   87     0.00000
 1079   69 GLU  HB2  -28.98705  49.58209  -9.07066 1S   87     0.00000
 1080   69 GLU  CG   -28.41783  51.47021  -9.99557 1S   87     1.00000
 1081   69 GLU  HG1  -28.61187  51.13741 -11.03611 1S   87     0.00000
 1082   69 GLU  HG2  -27.55271  52.16696 -10.00664 1S   87     0.00000
 1083   69 GLU  CD   -29.65249  52.20761  -9.48892 1S   87     1.00000
 1084   69 GLU  OE1  -30.73265  52.04944 -10.11716 1S   87     1.00000
 1085   69 GLU  OE2  -29.53079  52.94592  -8.47637 1S   87     1.00000
 1086   69 GLU  C    -26.51085  48.34064  -8.74107 1S   87     1.00000
 1087   69 GLU  O    -26.68034  48.48654  -7.53070 1S   87     1.00000
 1088   70 ILE  N    -25.95554  47.20921  -9.24604 1S   88     1.00000
 1089   70 ILE  HN   -25.83284  47.08669 -10.22965 1S   88     0.00000
 1090   70 ILE  CA   -25.49310  46.10877  -8.41692 1S   88     1.00000
 1091   70 ILE  HA   -25.54183  46.38609  -7.37254 1S   88     0.00000
 1092   70 ILE  CB   -26.28905  44.81858  -8.61883 1S   88     1.00000
 1093   70 ILE  HB   -26.17061  44.49571  -9.67909 1S   88     0.00000
 1094   70 ILE  CG2  -25.71473  43.69311  -7.72051 1S   88     1.00000
 1095   70 ILE  HG21 -25.76703  43.98312  -6.65036 1S   88     0.00000
 1096   70 ILE  HG22 -24.65583  43.47831  -7.96864 1S   88     0.00000
 1097   70 ILE  HG23 -26.27779  42.74893  -7.86917 1S   88     0.00000
 1098   70 ILE  CG1  -27.80921  45.07461  -8.40361 1S   88     1.00000
 1099   70 ILE  HG11 -28.33495  44.89491  -9.36586 1S   88     0.00000
 1100   70 ILE  HG12 -27.98379  46.13846  -8.13759 1S   88     0.00000
 1101   70 ILE  CD   -28.47735  44.22660  -7.32204 1S   88     1.00000
 1102   70 ILE  HD1  -27.98094  44.38225  -6.34483 1S   88     0.00000
 1103   70 ILE  HD2  -28.42962  43.14690  -7.57185 1S   88     0.00000
 1104   70 ILE  HD3  -29.54595  44.51608  -7.22333 1S   88     0.00000
 1105   70 ILE  C    -24.04392  45.88184  -8.77372 1S   88     1.00000
 1106   70 ILE  O    -23.70274  45.71502  -9.94421 1S   88     1.00000
 1107   71 GLN  N    -23.15527  45.87972  -7.75024 1S   89     1.00000
 1108   71 GLN  HN   -23.46301  45.99019  -6.80445 1S   89     0.00000
 1109   71 GLN  CA   -21.72218  45.77544  -7.92224 1S   89     1.00000
 1110   71 GLN  HA   -21.46893  45.93528  -8.96123 1S   89     0.00000
 1111   71 GLN  CB   -20.92905  46.79831  -7.07367 1S   89     1.00000
 1112   71 GLN  HB1  -19.85848  46.48803  -7.03631 1S   89     0.00000
 1113   71 GLN  HB2  -21.30787  46.80024  -6.02964 1S   89     0.00000
 1114   71 GLN  CG   -20.92993  48.22681  -7.66372 1S   89     1.00000
 1115   71 GLN  HG1  -20.59131  48.17806  -8.72159 1S   89     0.00000
 1116   71 GLN  HG2  -20.21304  48.86169  -7.10147 1S   89     0.00000
 1117   71 GLN  CD   -22.31119  48.89287  -7.62897 1S   89     1.00000
 1118   71 GLN  OE1  -22.79927  49.38579  -8.65111 1S   89     1.00000
 1119   71 GLN  NE2  -22.94742  48.90856  -6.42035 1S   89     1.00000
 1120   71 GLN  HE21 -23.85103  49.32308  -6.34768 1S   89     0.00000
 1121   71 GLN  HE22 -22.52228  48.46576  -5.63042 1S   89     0.00000
 1122   71 GLN  C    -21.25208  44.39355  -7.56133 1S   89     1.00000
 1123   71 GLN  O    -20.40241  43.84321  -8.26021 1S   89     1.00000
 1124   72 ASN  N    -21.78878  43.78765  -6.46852 1S   90     1.00000
 1125   72 ASN  HN   -22.46248  44.25801  -5.89817 1S   90     0.00000
 1126   72 ASN  CA   -21.44026  42.44122  -6.04741 1S   90     1.00000
 1127   72 ASN  HA   -20.36396  42.40372  -5.94297 1S   90     0.00000
 1128   72 ASN  CB   -22.09964  42.08472  -4.68115 1S   90     1.00000
 1129   72 ASN  HB1  -23.20374  42.06336  -4.78794 1S   90     0.00000
 1130   72 ASN  HB2  -21.84787  42.89901  -3.96662 1S   90     0.00000
 1131   72 ASN  CG   -21.62900  40.74381  -4.08910 1S   90     1.00000
 1132   72 ASN  OD1  -21.45512  39.74528  -4.79268 1S   90     1.00000
 1133   72 ASN  ND2  -21.44500  40.71840  -2.73551 1S   90     1.00000
 1134   72 ASN  HD21 -21.15278  39.86963  -2.29977 1S   90     0.00000
 1135   72 ASN  HD22 -21.59361  41.54652  -2.19600 1S   90     0.00000
 1136   72 ASN  C    -21.86651  41.47592  -7.13640 1S   90     1.00000
 1137   72 ASN  O    -23.03754  41.41569  -7.49945 1S   90     1.00000
 1138   73 LEU  N    -20.88548  40.73974  -7.71155 1S   91     1.00000
 1139   73 LEU  HN   -19.95322  40.77002  -7.36129 1S   91     0.00000
 1140   73 LEU  CA   -21.05401  40.00996  -8.94652 1S   91     1.00000
 1141   73 LEU  HA   -21.61661  40.63708  -9.62136 1S   91     0.00000
 1142   73 LEU  CB   -19.71044  39.64072  -9.61145 1S   91     1.00000
 1143   73 LEU  HB1  -19.85966  38.83922 -10.37085 1S   91     0.00000
 1144   73 LEU  HB2  -19.02801  39.23875  -8.83069 1S   91     0.00000
 1145   73 LEU  CG   -19.01537  40.81331 -10.33844 1S   91     1.00000
 1146   73 LEU  HG   -18.96053  41.67955  -9.63999 1S   91     0.00000
 1147   73 LEU  CD1  -17.57668  40.41160 -10.70310 1S   91     1.00000
 1148   73 LEU  HD11 -17.59277  39.51916 -11.36345 1S   91     0.00000
 1149   73 LEU  HD12 -17.00105  40.16209  -9.78705 1S   91     0.00000
 1150   73 LEU  HD13 -17.06231  41.23957 -11.23407 1S   91     0.00000
 1151   73 LEU  CD2  -19.78556  41.26297 -11.59802 1S   91     1.00000
 1152   73 LEU  HD21 -20.79528  41.64038 -11.33642 1S   91     0.00000
 1153   73 LEU  HD22 -19.89568  40.41206 -12.30371 1S   91     0.00000
 1154   73 LEU  HD23 -19.23273  42.07610 -12.11433 1S   91     0.00000
 1155   73 LEU  C    -21.83635  38.74184  -8.77958 1S   91     1.00000
 1156   73 LEU  O    -22.57805  38.37647  -9.68339 1S   91     1.00000
 1157   74 THR  N    -21.71725  38.03071  -7.63644 1S   92     1.00000
 1158   74 THR  HN   -21.11265  38.31230  -6.89397 1S   92     0.00000
 1159   74 THR  CA   -22.48286  36.81844  -7.40376 1S   92     1.00000
 1160   74 THR  HA   -22.44375  36.22719  -8.30899 1S   92     0.00000
 1161   74 THR  CB   -21.94278  35.94758  -6.28146 1S   92     1.00000
 1162   74 THR  HB   -22.69670  35.18963  -5.96793 1S   92     0.00000
 1163   74 THR  OG1  -21.57478  36.73050  -5.15329 1S   92     1.00000
 1164   74 THR  HG1  -21.07043  36.14889  -4.57971 1S   92     0.00000
 1165   74 THR  CG2  -20.70029  35.19929  -6.80359 1S   92     1.00000
 1166   74 THR  HG21 -19.91049  35.91325  -7.11829 1S   92     0.00000
 1167   74 THR  HG22 -20.97109  34.56630  -7.67564 1S   92     0.00000
 1168   74 THR  HG23 -20.28638  34.53827  -6.01276 1S   92     0.00000
 1169   74 THR  C    -23.93839  37.15176  -7.17630 1S   92     1.00000
 1170   74 THR  O    -24.80930  36.41858  -7.63598 1S   92     1.00000
 1171   75 VAL  N    -24.23840  38.30734  -6.53011 1S   93     1.00000
 1172   75 VAL  HN   -23.51291  38.86595  -6.13303 1S   93     0.00000
 1173   75 VAL  CA   -25.58033  38.86040  -6.42868 1S   93     1.00000
 1174   75 VAL  HA   -26.21959  38.10273  -5.99758 1S   93     0.00000
 1175   75 VAL  CB   -25.62723  40.10991  -5.54854 1S   93     1.00000
 1176   75 VAL  HB   -24.89806  40.85990  -5.92698 1S   93     0.00000
 1177   75 VAL  CG1  -27.02842  40.76525  -5.54805 1S   93     1.00000
 1178   75 VAL  HG11 -27.79559  40.03883  -5.21201 1S   93     0.00000
 1179   75 VAL  HG12 -27.30505  41.13533  -6.55656 1S   93     0.00000
 1180   75 VAL  HG13 -27.03975  41.63407  -4.85615 1S   93     0.00000
 1181   75 VAL  CG2  -25.21409  39.71432  -4.11615 1S   93     1.00000
 1182   75 VAL  HG21 -24.18464  39.30226  -4.09101 1S   93     0.00000
 1183   75 VAL  HG22 -25.91324  38.95196  -3.71167 1S   93     0.00000
 1184   75 VAL  HG23 -25.24673  40.60657  -3.45604 1S   93     0.00000
 1185   75 VAL  C    -26.10529  39.17957  -7.81436 1S   93     1.00000
 1186   75 VAL  O    -27.25432  38.88000  -8.13280 1S   93     1.00000
 1187   76 LYS  N    -25.24249  39.75861  -8.68168 1S   94     1.00000
 1188   76 LYS  HN   -24.31456  39.98542  -8.39062 1S   94     0.00000
 1189   76 LYS  CA   -25.56132  40.13676 -10.03925 1S   94     1.00000
 1190   76 LYS  HA   -26.43293  40.77461  -9.98673 1S   94     0.00000
 1191   76 LYS  CB   -24.40031  40.92927 -10.68601 1S   94     1.00000
 1192   76 LYS  HB1  -23.75701  40.26259 -11.30145 1S   94     0.00000
 1193   76 LYS  HB2  -23.75552  41.34146  -9.87979 1S   94     0.00000
 1194   76 LYS  CG   -24.86582  42.11903 -11.53170 1S   94     1.00000
 1195   76 LYS  HG1  -25.32810  42.87910 -10.86489 1S   94     0.00000
 1196   76 LYS  HG2  -25.64258  41.77223 -12.24824 1S   94     0.00000
 1197   76 LYS  CD   -23.71396  42.75895 -12.31993 1S   94     1.00000
 1198   76 LYS  HD1  -23.24053  41.95549 -12.92795 1S   94     0.00000
 1199   76 LYS  HD2  -22.94977  43.15341 -11.61358 1S   94     0.00000
 1200   76 LYS  CE   -24.19596  43.88587 -13.23879 1S   94     1.00000
 1201   76 LYS  HE1  -24.36707  44.81520 -12.65791 1S   94     0.00000
 1202   76 LYS  HE2  -25.13592  43.58138 -13.74281 1S   94     0.00000
 1203   76 LYS  NZ   -23.21755  44.18280 -14.30775 1S   94     1.00000
 1204   76 LYS  HZ1  -23.07388  43.32750 -14.88230 1S   94     0.00000
 1205   76 LYS  HZ2  -22.31421  44.47910 -13.88802 1S   94     0.00000
 1206   76 LYS  HZ3  -23.59048  44.94411 -14.91084 1S   94     0.00000
 1207   76 LYS  C    -25.89531  38.93704 -10.90447 1S   94     1.00000
 1208   76 LYS  O    -26.83805  38.98513 -11.68940 1S   94     1.00000
 1209   77 LEU  N    -25.13910  37.81923 -10.75194 1S   95     1.00000
 1210   77 LEU  HN   -24.36208  37.82694 -10.12322 1S   95     0.00000
 1211   77 LEU  CA   -25.33361  36.57119 -11.46422 1S   95     1.00000
 1212   77 LEU  HA   -25.32999  36.79139 -12.52066 1S   95     0.00000
 1213   77 LEU  CB   -24.25890  35.50123 -11.11979 1S   95     1.00000
 1214   77 LEU  HB1  -24.63328  34.49091 -11.40399 1S   95     0.00000
 1215   77 LEU  HB2  -24.09631  35.49378 -10.02002 1S   95     0.00000
 1216   77 LEU  CG   -22.89040  35.65993 -11.82326 1S   95     1.00000
 1217   77 LEU  HG   -22.41985  36.60829 -11.48004 1S   95     0.00000
 1218   77 LEU  CD1  -21.95766  34.50137 -11.41673 1S   95     1.00000
 1219   77 LEU  HD11 -22.40078  33.52862 -11.71970 1S   95     0.00000
 1220   77 LEU  HD12 -21.80485  34.49098 -10.31704 1S   95     0.00000
 1221   77 LEU  HD13 -20.96833  34.60475 -11.91012 1S   95     0.00000
 1222   77 LEU  CD2  -23.02575  35.73190 -13.35676 1S   95     1.00000
 1223   77 LEU  HD21 -23.50936  36.68214 -13.66511 1S   95     0.00000
 1224   77 LEU  HD22 -23.63727  34.88228 -13.72801 1S   95     0.00000
 1225   77 LEU  HD23 -22.02512  35.68338 -13.83532 1S   95     0.00000
 1226   77 LEU  C    -26.67337  35.95728 -11.14922 1S   95     1.00000
 1227   77 LEU  O    -27.37905  35.50994 -12.05090 1S   95     1.00000
 1228   78 GLN  N    -27.05331  35.93109  -9.85361 1S   96     1.00000
 1229   78 GLN  HN   -26.46804  36.31597  -9.14232 1S   96     0.00000
 1230   78 GLN  CA   -28.28096  35.32957  -9.38765 1S   96     1.00000
 1231   78 GLN  HA   -28.35579  34.33534  -9.80732 1S   96     0.00000
 1232   78 GLN  CB   -28.30551  35.24538  -7.85219 1S   96     1.00000
 1233   78 GLN  HB1  -29.31501  34.94402  -7.49689 1S   96     0.00000
 1234   78 GLN  HB2  -28.08976  36.25687  -7.44044 1S   96     0.00000
 1235   78 GLN  CG   -27.28293  34.23442  -7.31517 1S   96     1.00000
 1236   78 GLN  HG1  -26.29534  34.38241  -7.79881 1S   96     0.00000
 1237   78 GLN  HG2  -27.61715  33.20100  -7.53744 1S   96     0.00000
 1238   78 GLN  CD   -27.16024  34.40701  -5.80172 1S   96     1.00000
 1239   78 GLN  OE1  -27.97580  33.89205  -5.03139 1S   96     1.00000
 1240   78 GLN  NE2  -26.11185  35.17076  -5.37487 1S   96     1.00000
 1241   78 GLN  HE21 -25.50811  35.59316  -6.05598 1S   96     0.00000
 1242   78 GLN  HE22 -25.97331  35.32849  -4.40136 1S   96     0.00000
 1243   78 GLN  C    -29.47825  36.11843  -9.83503 1S   96     1.00000
 1244   78 GLN  O    -30.43715  35.54894 -10.35242 1S   96     1.00000
 1245   79 LEU  N    -29.43406  37.46403  -9.68071 1S   97     1.00000
 1246   79 LEU  HN   -28.64999  37.90849  -9.24965 1S   97     0.00000
 1247   79 LEU  CA   -30.48980  38.34845 -10.12081 1S   97     1.00000
 1248   79 LEU  HA   -31.39207  38.02417  -9.62712 1S   97     0.00000
 1249   79 LEU  CB   -30.19075  39.84490  -9.83402 1S   97     1.00000
 1250   79 LEU  HB1  -30.40394  40.45259 -10.74032 1S   97     0.00000
 1251   79 LEU  HB2  -29.10478  39.96377  -9.62764 1S   97     0.00000
 1252   79 LEU  CG   -30.99090  40.53539  -8.70347 1S   97     1.00000
 1253   79 LEU  HG   -30.52823  40.26371  -7.72765 1S   97     0.00000
 1254   79 LEU  CD1  -30.86593  42.05679  -8.89821 1S   97     1.00000
 1255   79 LEU  HD11 -31.42215  42.37004  -9.80855 1S   97     0.00000
 1256   79 LEU  HD12 -29.80297  42.34409  -9.02914 1S   97     0.00000
 1257   79 LEU  HD13 -31.28325  42.59893  -8.02594 1S   97     0.00000
 1258   79 LEU  CD2  -32.48091  40.14919  -8.64889 1S   97     1.00000
 1259   79 LEU  HD21 -32.60902  39.10439  -8.29690 1S   97     0.00000
 1260   79 LEU  HD22 -32.93426  40.25031  -9.65774 1S   97     0.00000
 1261   79 LEU  HD23 -33.02825  40.81607  -7.94951 1S   97     0.00000
 1262   79 LEU  C    -30.72619  38.20451 -11.60478 1S   97     1.00000
 1263   79 LEU  O    -31.86809  38.09495 -12.02911 1S   97     1.00000
 1264   80 GLN  N    -29.64821  38.16576 -12.41949 1S   98     1.00000
 1265   80 GLN  HN   -28.72358  38.23042 -12.04671 1S   98     0.00000
 1266   80 GLN  CA   -29.72822  38.08501 -13.86072 1S   98     1.00000
 1267   80 GLN  HA   -30.36204  38.89612 -14.19206 1S   98     0.00000
 1268   80 GLN  CB   -28.33593  38.25801 -14.49784 1S   98     1.00000
 1269   80 GLN  HB1  -27.68298  37.40780 -14.20087 1S   98     0.00000
 1270   80 GLN  HB2  -27.89144  39.18749 -14.07416 1S   98     0.00000
 1271   80 GLN  CG   -28.37427  38.39208 -16.03170 1S   98     1.00000
 1272   80 GLN  HG1  -29.14151  39.14750 -16.30991 1S   98     0.00000
 1273   80 GLN  HG2  -28.64809  37.42579 -16.50368 1S   98     0.00000
 1274   80 GLN  CD   -27.02531  38.86272 -16.58493 1S   98     1.00000
 1275   80 GLN  OE1  -26.98113  39.69986 -17.49231 1S   98     1.00000
 1276   80 GLN  NE2  -25.90674  38.31426 -16.02537 1S   98     1.00000
 1277   80 GLN  HE21 -25.00777  38.58791 -16.35842 1S   98     0.00000
 1278   80 GLN  HE22 -25.99809  37.65787 -15.27661 1S   98     0.00000
 1279   80 GLN  C    -30.33437  36.78455 -14.33685 1S   98     1.00000
 1280   80 GLN  O    -31.13732  36.77514 -15.26914 1S   98     1.00000
 1281   81 ALA  N    -29.99162  35.65459 -13.67114 1S   99     1.00000
 1282   81 ALA  HN   -29.32580  35.68099 -12.92727 1S   99     0.00000
 1283   81 ALA  CA   -30.54235  34.34697 -13.95834 1S   99     1.00000
 1284   81 ALA  HA   -30.37506  34.13644 -15.00579 1S   99     0.00000
 1285   81 ALA  CB   -29.88840  33.24603 -13.10087 1S   99     1.00000
 1286   81 ALA  HB1  -30.03413  33.44798 -12.01806 1S   99     0.00000
 1287   81 ALA  HB2  -28.79771  33.20478 -13.30356 1S   99     0.00000
 1288   81 ALA  HB3  -30.32413  32.25110 -13.33776 1S   99     0.00000
 1289   81 ALA  C    -32.02588  34.29570 -13.69522 1S   99     1.00000
 1290   81 ALA  O    -32.76948  33.63087 -14.41059 1S   99     1.00000
 1291   82 LEU  N    -32.50093  35.01433 -12.65731 1S   100    1.00000
 1292   82 LEU  HN   -31.89377  35.53749 -12.06161 1S   100    0.00000
 1293   82 LEU  CA   -33.89911  35.02968 -12.31524 1S   100    1.00000
 1294   82 LEU  HA   -34.27722  34.03752 -12.50547 1S   100    0.00000
 1295   82 LEU  CB   -34.08878  35.38663 -10.82490 1S   100    1.00000
 1296   82 LEU  HB1  -33.93779  36.47702 -10.66691 1S   100    0.00000
 1297   82 LEU  HB2  -33.28513  34.86501 -10.25656 1S   100    0.00000
 1298   82 LEU  CG   -35.43600  34.95281 -10.20251 1S   100    1.00000
 1299   82 LEU  HG   -36.23980  35.60769 -10.61048 1S   100    0.00000
 1300   82 LEU  CD1  -35.81105  33.49350 -10.53126 1S   100    1.00000
 1301   82 LEU  HD11 -34.96210  32.81738 -10.29387 1S   100    0.00000
 1302   82 LEU  HD12 -36.06603  33.38371 -11.60640 1S   100    0.00000
 1303   82 LEU  HD13 -36.69448  33.17674  -9.93928 1S   100    0.00000
 1304   82 LEU  CD2  -35.38266  35.15780  -8.67993 1S   100    1.00000
 1305   82 LEU  HD21 -35.16836  36.21840  -8.44034 1S   100    0.00000
 1306   82 LEU  HD22 -34.58411  34.52521  -8.23656 1S   100    0.00000
 1307   82 LEU  HD23 -36.34816  34.87559  -8.21647 1S   100    0.00000
 1308   82 LEU  C    -34.66495  35.99365 -13.18814 1S   100    1.00000
 1309   82 LEU  O    -35.84593  35.79201 -13.45289 1S   100    1.00000
 1310   83 GLN  N    -33.99529  37.05953 -13.67837 1S   101    1.00000
 1311   83 GLN  HN   -33.02668  37.18958 -13.47322 1S   101    0.00000
 1312   83 GLN  CA   -34.60658  38.11928 -14.44141 1S   101    1.00000
 1313   83 GLN  HA   -35.55085  38.37268 -13.97809 1S   101    0.00000
 1314   83 GLN  CB   -33.72762  39.38027 -14.50801 1S   101    1.00000
 1315   83 GLN  HB1  -34.03286  40.03723 -15.35774 1S   101    0.00000
 1316   83 GLN  HB2  -32.67242  39.07193 -14.67744 1S   101    0.00000
 1317   83 GLN  CG   -33.85718  40.22571 -13.24150 1S   101    1.00000
 1318   83 GLN  HG1  -33.64149  39.63125 -12.33288 1S   101    0.00000
 1319   83 GLN  HG2  -34.89871  40.59555 -13.16524 1S   101    0.00000
 1320   83 GLN  CD   -32.89276  41.40314 -13.33267 1S   101    1.00000
 1321   83 GLN  OE1  -32.07247  41.50701 -14.24983 1S   101    1.00000
 1322   83 GLN  NE2  -33.01104  42.32285 -12.33777 1S   101    1.00000
 1323   83 GLN  HE21 -33.71405  42.20650 -11.63215 1S   101    0.00000
 1324   83 GLN  HE22 -32.43142  43.13526 -12.33051 1S   101    0.00000
 1325   83 GLN  C    -34.88853  37.75321 -15.85923 1S   101    1.00000
 1326   83 GLN  O    -35.72859  38.41293 -16.46320 1S   101    1.00000
 1327   84 GLN  N    -34.21435  36.72753 -16.44002 1S   102    1.00000
 1328   84 GLN  HN   -33.49668  36.23009 -15.95804 1S   102    0.00000
 1329   84 GLN  CA   -34.48792  36.31526 -17.80130 1S   102    1.00000
 1330   84 GLN  HA   -34.43503  37.20922 -18.40992 1S   102    0.00000
 1331   84 GLN  CB   -33.45337  35.33646 -18.41438 1S   102    1.00000
 1332   84 GLN  HB1  -32.47767  35.87027 -18.48082 1S   102    0.00000
 1333   84 GLN  HB2  -33.77705  35.09652 -19.45079 1S   102    0.00000
 1334   84 GLN  CG   -33.22563  34.04275 -17.60643 1S   102    1.00000
 1335   84 GLN  HG1  -34.17911  33.50458 -17.43418 1S   102    0.00000
 1336   84 GLN  HG2  -32.80356  34.32920 -16.62435 1S   102    0.00000
 1337   84 GLN  CD   -32.25747  33.05103 -18.26616 1S   102    1.00000
 1338   84 GLN  OE1  -31.72458  32.16947 -17.58311 1S   102    1.00000
 1339   84 GLN  NE2  -32.04284  33.17822 -19.60774 1S   102    1.00000
 1340   84 GLN  HE21 -31.42770  32.54328 -20.06810 1S   102    0.00000
 1341   84 GLN  HE22 -32.50490  33.90342 -20.11833 1S   102    0.00000
 1342   84 GLN  C    -35.90238  35.77628 -17.91383 1S   102    1.00000
 1343   84 GLN  O    -36.23156  34.64145 -17.57870 1S   102    1.00000
 1344   85 ASN  N    -36.78810  36.66993 -18.38550 1S   103    1.00000
 1345   85 ASN  HN   -36.46564  37.58554 -18.62319 1S   103    0.00000
 1346   85 ASN  CA   -38.20461  36.51458 -18.57308 1S   103    1.00000
 1347   85 ASN  HA   -38.61638  36.11061 -17.65819 1S   103    0.00000
 1348   85 ASN  CB   -38.94063  37.85451 -18.91651 1S   103    1.00000
 1349   85 ASN  HB1  -39.38084  38.23748 -17.97424 1S   103    0.00000
 1350   85 ASN  HB2  -39.78687  37.66777 -19.60777 1S   103    0.00000
 1351   85 ASN  CG   -38.08383  38.97658 -19.53935 1S   103    1.00000
 1352   85 ASN  OD1  -36.94954  38.80498 -19.98706 1S   103    1.00000
 1353   85 ASN  ND2  -38.68033  40.20626 -19.57224 1S   103    1.00000
 1354   85 ASN  HD21 -38.18409  40.97445 -19.96884 1S   103    0.00000
 1355   85 ASN  HD22 -39.59549  40.33235 -19.18894 1S   103    0.00000
 1356   85 ASN  C    -38.45584  35.51408 -19.65671 1S   103    1.00000
 1357   85 ASN  O    -39.38214  34.70928 -19.56660 1S   103    1.00000
 1358   86 GLY  N    -37.60692  35.54073 -20.70727 1S   104    1.00000
 1359   86 GLY  HN   -36.87376  36.21589 -20.75279 1S   104    0.00000
 1360   86 GLY  CA   -37.64307  34.56755 -21.76371 1S   104    1.00000
 1361   86 GLY  HA1  -37.71208  33.57939 -21.32961 1S   104    0.00000
 1362   86 GLY  HA2  -36.75399  34.71761 -22.35777 1S   104    0.00000
 1363   86 GLY  C    -38.83207  34.82443 -22.62877 1S   104    1.00000
 1364   86 GLY  O    -38.90995  35.85329 -23.29080 1S   104    1.00000
 1365   87 SER  N    -39.80254  33.88250 -22.62366 1S   105    1.00000
 1366   87 SER  HN   -39.72501  33.07465 -22.04511 1S   105    0.00000
 1367   87 SER  CA   -40.95835  33.92639 -23.48783 1S   105    1.00000
 1368   87 SER  HA   -40.59559  34.15175 -24.48143 1S   105    0.00000
 1369   87 SER  CB   -41.71527  32.57590 -23.52529 1S   105    1.00000
 1370   87 SER  HB1  -42.45894  32.49790 -22.70305 1S   105    0.00000
 1371   87 SER  HB2  -40.98276  31.74929 -23.40279 1S   105    0.00000
 1372   87 SER  OG   -42.36316  32.38816 -24.77958 1S   105    1.00000
 1373   87 SER  HG1  -43.04133  33.06664 -24.84212 1S   105    0.00000
 1374   87 SER  C    -41.92476  35.01221 -23.08322 1S   105    1.00000
 1375   87 SER  O    -42.63794  35.53520 -23.93275 1S   105    1.00000
 1376   88 SER  N    -41.95559  35.39665 -21.77967 1S   106    1.00000
 1377   88 SER  HN   -41.34853  34.97864 -21.10676 1S   106    0.00000
 1378   88 SER  CA   -42.89115  36.37368 -21.25145 1S   106    1.00000
 1379   88 SER  HA   -43.85573  36.13485 -21.67810 1S   106    0.00000
 1380   88 SER  CB   -43.06422  36.26171 -19.70775 1S   106    1.00000
 1381   88 SER  HB1  -43.16456  35.18936 -19.43678 1S   106    0.00000
 1382   88 SER  HB2  -43.98818  36.78843 -19.38815 1S   106    0.00000
 1383   88 SER  OG   -41.96913  36.79058 -18.97233 1S   106    1.00000
 1384   88 SER  HG1  -42.02852  37.74648 -19.06566 1S   106    0.00000
 1385   88 SER  C    -42.57506  37.81045 -21.64951 1S   106    1.00000
 1386   88 SER  O    -43.25079  38.73463 -21.20082 1S   106    1.00000
 1387   89 VAL  N    -41.55767  38.03171 -22.52097 1S   107    1.00000
 1388   89 VAL  HN   -40.97866  37.28158 -22.83185 1S   107    0.00000
 1389   89 VAL  CA   -41.29606  39.31683 -23.13649 1S   107    1.00000
 1390   89 VAL  HA   -41.57397  40.08639 -22.42948 1S   107    0.00000
 1391   89 VAL  CB   -39.82220  39.50809 -23.47984 1S   107    1.00000
 1392   89 VAL  HB   -39.21731  39.11349 -22.62923 1S   107    0.00000
 1393   89 VAL  CG1  -39.42166  38.73170 -24.75139 1S   107    1.00000
 1394   89 VAL  HG11 -39.96841  39.09833 -25.64332 1S   107    0.00000
 1395   89 VAL  HG12 -39.62780  37.65038 -24.64303 1S   107    0.00000
 1396   89 VAL  HG13 -38.34228  38.87888 -24.95281 1S   107    0.00000
 1397   89 VAL  CG2  -39.50680  41.01402 -23.59430 1S   107    1.00000
 1398   89 VAL  HG21 -39.76485  41.53854 -22.65060 1S   107    0.00000
 1399   89 VAL  HG22 -40.08275  41.47476 -24.42301 1S   107    0.00000
 1400   89 VAL  HG23 -38.42447  41.16174 -23.79575 1S   107    0.00000
 1401   89 VAL  C    -42.17001  39.47445 -24.36716 1S   107    1.00000
 1402   89 VAL  O    -42.45600  40.58840 -24.80375 1S   107    1.00000
 1403   90 LEU  N    -42.64404  38.34155 -24.94521 1S   108    1.00000
 1404   90 LEU  HN   -42.40764  37.44010 -24.58709 1S   108    0.00000
 1405   90 LEU  CA   -43.59908  38.33787 -26.02451 1S   108    1.00000
 1406   90 LEU  HA   -43.34166  39.10936 -26.73645 1S   108    0.00000
 1407   90 LEU  CB   -43.71879  36.95813 -26.72380 1S   108    1.00000
 1408   90 LEU  HB1  -44.57056  36.97835 -27.43357 1S   108    0.00000
 1409   90 LEU  HB2  -43.94899  36.18584 -25.95909 1S   108    0.00000
 1410   90 LEU  CG   -42.48626  36.49109 -27.52379 1S   108    1.00000
 1411   90 LEU  HG   -41.59215  36.52974 -26.85989 1S   108    0.00000
 1412   90 LEU  CD1  -42.66620  35.02636 -27.97293 1S   108    1.00000
 1413   90 LEU  HD11 -43.62372  34.90410 -28.52120 1S   108    0.00000
 1414   90 LEU  HD12 -42.67256  34.35113 -27.09121 1S   108    0.00000
 1415   90 LEU  HD13 -41.83996  34.72002 -28.64716 1S   108    0.00000
 1416   90 LEU  CD2  -42.22642  37.40333 -28.73349 1S   108    1.00000
 1417   90 LEU  HD21 -41.88873  38.40876 -28.40537 1S   108    0.00000
 1418   90 LEU  HD22 -43.14805  37.51362 -29.34256 1S   108    0.00000
 1419   90 LEU  HD23 -41.44102  36.96046 -29.37779 1S   108    0.00000
 1420   90 LEU  C    -44.95441  38.63395 -25.44407 1S   108    1.00000
 1421   90 LEU  O    -45.18725  38.45159 -24.24822 1S   108    1.00000
 1422   91 SER  N    -45.90491  39.06328 -26.31227 1S   109    1.00000
 1423   91 SER  HN   -45.68051  39.25925 -27.26267 1S   109    0.00000
 1424   91 SER  CA   -47.29780  39.22527 -25.95274 1S   109    1.00000
 1425   91 SER  HA   -47.33076  39.90077 -25.10912 1S   109    0.00000
 1426   91 SER  CB   -48.16364  39.83512 -27.09894 1S   109    1.00000
 1427   91 SER  HB1  -47.58806  40.64609 -27.59440 1S   109    0.00000
 1428   91 SER  HB2  -49.09034  40.27331 -26.67338 1S   109    0.00000
 1429   91 SER  OG   -48.54598  38.88788 -28.09201 1S   109    1.00000
 1430   91 SER  HG1  -49.06768  39.36213 -28.74466 1S   109    0.00000
 1431   91 SER  C    -47.86263  37.88901 -25.52796 1S   109    1.00000
 1432   91 SER  O    -47.29338  36.84142 -25.83490 1S   109    1.00000
 1433   92 GLU  N    -49.01129  37.88945 -24.82142 1S   110    1.00000
 1434   92 GLU  HN   -49.46507  38.73361 -24.54850 1S   110    0.00000
 1435   92 GLU  CA   -49.61276  36.66788 -24.34026 1S   110    1.00000
 1436   92 GLU  HA   -48.85103  36.14445 -23.77771 1S   110    0.00000
 1437   92 GLU  CB   -50.81804  36.90717 -23.40436 1S   110    1.00000
 1438   92 GLU  HB1  -50.86566  36.03905 -22.70890 1S   110    0.00000
 1439   92 GLU  HB2  -51.77368  36.93679 -23.97361 1S   110    0.00000
 1440   92 GLU  CG   -50.70943  38.22665 -22.61190 1S   110    1.00000
 1441   92 GLU  HG1  -50.99495  39.07124 -23.27683 1S   110    0.00000
 1442   92 GLU  HG2  -49.66641  38.38376 -22.26427 1S   110    0.00000
 1443   92 GLU  CD   -51.62219  38.24502 -21.38429 1S   110    1.00000
 1444   92 GLU  OE1  -52.24772  37.19878 -21.06905 1S   110    1.00000
 1445   92 GLU  OE2  -51.68904  39.32355 -20.73629 1S   110    1.00000
 1446   92 GLU  C    -50.04003  35.79140 -25.48781 1S   110    1.00000
 1447   92 GLU  O    -49.85271  34.58204 -25.45305 1S   110    1.00000
 1448   93 ASP  N    -50.56767  36.40589 -26.56888 1S   111    1.00000
 1449   93 ASP  HN   -50.67140  37.39693 -26.59128 1S   111    0.00000
 1450   93 ASP  CA   -51.00105  35.71596 -27.75727 1S   111    1.00000
 1451   93 ASP  HA   -51.70244  34.95338 -27.44756 1S   111    0.00000
 1452   93 ASP  CB   -51.71776  36.70489 -28.70627 1S   111    1.00000
 1453   93 ASP  HB1  -51.01699  37.51069 -29.01249 1S   111    0.00000
 1454   93 ASP  HB2  -52.57109  37.17408 -28.17099 1S   111    0.00000
 1455   93 ASP  CG   -52.25686  35.99952 -29.94524 1S   111    1.00000
 1456   93 ASP  OD1  -53.11927  35.09392 -29.80875 1S   111    1.00000
 1457   93 ASP  OD2  -51.77478  36.35968 -31.04861 1S   111    1.00000
 1458   93 ASP  C    -49.83964  35.02547 -28.44891 1S   111    1.00000
 1459   93 ASP  O    -49.95330  33.86071 -28.82011 1S   111    1.00000
 1460   94 LYS  N    -48.68470  35.71233 -28.60635 1S   112    1.00000
 1461   94 LYS  HN   -48.59222  36.65579 -28.29265 1S   112    0.00000
 1462   94 LYS  CA   -47.52163  35.14702 -29.25390 1S   112    1.00000
 1463   94 LYS  HA   -47.84637  34.70353 -30.18491 1S   112    0.00000
 1464   94 LYS  CB   -46.46282  36.21110 -29.58615 1S   112    1.00000
 1465   94 LYS  HB1  -45.57461  35.72388 -30.04397 1S   112    0.00000
 1466   94 LYS  HB2  -46.13530  36.72151 -28.65695 1S   112    0.00000
 1467   94 LYS  CG   -47.00032  37.26304 -30.56047 1S   112    1.00000
 1468   94 LYS  HG1  -47.49397  38.06696 -29.98644 1S   112    0.00000
 1469   94 LYS  HG2  -47.76664  36.80661 -31.22561 1S   112    0.00000
 1470   94 LYS  CD   -45.92357  37.90329 -31.43243 1S   112    1.00000
 1471   94 LYS  HD1  -45.64858  37.16778 -32.22118 1S   112    0.00000
 1472   94 LYS  HD2  -45.01134  38.09807 -30.82487 1S   112    0.00000
 1473   94 LYS  CE   -46.39365  39.22794 -32.04783 1S   112    1.00000
 1474   94 LYS  HE1  -46.00625  40.08250 -31.45273 1S   112    0.00000
 1475   94 LYS  HE2  -47.50278  39.27666 -32.07691 1S   112    0.00000
 1476   94 LYS  NZ   -45.90490  39.37269 -33.43689 1S   112    1.00000
 1477   94 LYS  HZ1  -46.39225  38.68409 -34.04473 1S   112    0.00000
 1478   94 LYS  HZ2  -44.87714  39.17833 -33.45496 1S   112    0.00000
 1479   94 LYS  HZ3  -46.08882  40.33564 -33.78104 1S   112    0.00000
 1480   94 LYS  C    -46.87681  34.05886 -28.43339 1S   112    1.00000
 1481   94 LYS  O    -46.37294  33.08950 -28.99257 1S   112    1.00000
 1482   95 SER  N    -46.91003  34.17256 -27.08500 1S   113    1.00000
 1483   95 SER  HN   -47.29488  34.98714 -26.65378 1S   113    0.00000
 1484   95 SER  CA   -46.40328  33.16003 -26.17917 1S   113    1.00000
 1485   95 SER  HA   -45.38736  32.93111 -26.47252 1S   113    0.00000
 1486   95 SER  CB   -46.41960  33.60136 -24.69887 1S   113    1.00000
 1487   95 SER  HB1  -46.00910  32.79068 -24.05740 1S   113    0.00000
 1488   95 SER  HB2  -47.45407  33.83158 -24.36550 1S   113    0.00000
 1489   95 SER  OG   -45.61318  34.75478 -24.50979 1S   113    1.00000
 1490   95 SER  HG1  -46.12017  35.50237 -24.84425 1S   113    0.00000
 1491   95 SER  C    -47.21550  31.89340 -26.26435 1S   113    1.00000
 1492   95 SER  O    -46.65618  30.80197 -26.31472 1S   113    1.00000
 1493   96 LYS  N    -48.56377  32.00952 -26.30382 1S   114    1.00000
 1494   96 LYS  HN   -49.00774  32.90317 -26.24934 1S   114    0.00000
 1495   96 LYS  CA   -49.45378  30.87349 -26.39844 1S   114    1.00000
 1496   96 LYS  HA   -49.16305  30.16090 -25.63877 1S   114    0.00000
 1497   96 LYS  CB   -50.93000  31.25127 -26.17190 1S   114    1.00000
 1498   96 LYS  HB1  -51.57090  30.35841 -26.35482 1S   114    0.00000
 1499   96 LYS  HB2  -51.21236  32.03496 -26.90759 1S   114    0.00000
 1500   96 LYS  CG   -51.22765  31.73625 -24.74076 1S   114    1.00000
 1501   96 LYS  HG1  -50.66742  32.66168 -24.51438 1S   114    0.00000
 1502   96 LYS  HG2  -50.87065  30.96151 -24.02613 1S   114    0.00000
 1503   96 LYS  CD   -52.72603  31.97563 -24.49057 1S   114    1.00000
 1504   96 LYS  HD1  -52.87682  32.23839 -23.41930 1S   114    0.00000
 1505   96 LYS  HD2  -53.24338  31.00806 -24.67804 1S   114    0.00000
 1506   96 LYS  CE   -53.34197  33.08386 -25.36136 1S   114    1.00000
 1507   96 LYS  HE1  -52.92963  33.07670 -26.39083 1S   114    0.00000
 1508   96 LYS  HE2  -53.15794  34.08247 -24.91261 1S   114    0.00000
 1509   96 LYS  NZ   -54.80564  32.89495 -25.49527 1S   114    1.00000
 1510   96 LYS  HZ1  -55.25564  32.93640 -24.55937 1S   114    0.00000
 1511   96 LYS  HZ2  -54.98650  31.96506 -25.92619 1S   114    0.00000
 1512   96 LYS  HZ3  -55.19751  33.63833 -26.10806 1S   114    0.00000
 1513   96 LYS  C    -49.33287  30.19297 -27.74065 1S   114    1.00000
 1514   96 LYS  O    -49.30455  28.96704 -27.79781 1S   114    1.00000
 1515   97 ARG  N    -49.20842  30.97220 -28.84595 1S   115    1.00000
 1516   97 ARG  HN   -49.28379  31.96633 -28.77728 1S   115    0.00000
 1517   97 ARG  CA   -48.93164  30.46939 -30.18073 1S   115    1.00000
 1518   97 ARG  HA   -49.72420  29.78629 -30.45316 1S   115    0.00000
 1519   97 ARG  CB   -48.84430  31.60181 -31.23506 1S   115    1.00000
 1520   97 ARG  HB1  -48.36236  31.23440 -32.16915 1S   115    0.00000
 1521   97 ARG  HB2  -48.20543  32.41170 -30.81956 1S   115    0.00000
 1522   97 ARG  CG   -50.21056  32.19338 -31.62684 1S   115    1.00000
 1523   97 ARG  HG1  -50.82422  32.29635 -30.70362 1S   115    0.00000
 1524   97 ARG  HG2  -50.74627  31.48375 -32.29299 1S   115    0.00000
 1525   97 ARG  CD   -50.09772  33.59639 -32.25560 1S   115    1.00000
 1526   97 ARG  HD1  -49.05257  33.96825 -32.19457 1S   115    0.00000
 1527   97 ARG  HD2  -50.75080  34.28551 -31.68645 1S   115    0.00000
 1528   97 ARG  NE   -50.49163  33.56799 -33.71003 1S   115    1.00000
 1529   97 ARG  HE   -50.04166  32.90849 -34.30457 1S   115    0.00000
 1530   97 ARG  CZ   -51.39038  34.42941 -34.27689 1S   115    1.00000
 1531   97 ARG  NH1  -51.63677  34.35587 -35.61115 1S   115    1.00000
 1532   97 ARG  HH11 -51.15902  33.68084 -36.17208 1S   115    0.00000
 1533   97 ARG  HH12 -52.28998  34.98672 -36.02556 1S   115    0.00000
 1534   97 ARG  NH2  -52.05577  35.37125 -33.56009 1S   115    1.00000
 1535   97 ARG  HH21 -51.87219  35.48733 -32.57148 1S   115    0.00000
 1536   97 ARG  HH22 -52.69958  35.98026 -34.00113 1S   115    0.00000
 1537   97 ARG  C    -47.62839  29.70573 -30.21355 1S   115    1.00000
 1538   97 ARG  O    -47.56816  28.61951 -30.77999 1S   115    1.00000
 1539   98 LEU  N    -46.56236  30.23893 -29.57130 1S   116    1.00000
 1540   98 LEU  HN   -46.62917  31.12598 -29.11617 1S   116    0.00000
 1541   98 LEU  CA   -45.25742  29.61861 -29.52591 1S   116    1.00000
 1542   98 LEU  HA   -44.98327  29.40640 -30.54914 1S   116    0.00000
 1543   98 LEU  CB   -44.18990  30.54380 -28.89664 1S   116    1.00000
 1544   98 LEU  HB1  -44.47537  30.78318 -27.84897 1S   116    0.00000
 1545   98 LEU  HB2  -44.19338  31.50091 -29.46411 1S   116    0.00000
 1546   98 LEU  CG   -42.74300  29.99097 -28.90432 1S   116    1.00000
 1547   98 LEU  HG   -42.70579  29.10588 -28.22692 1S   116    0.00000
 1548   98 LEU  CD1  -42.29289  29.51962 -30.30221 1S   116    1.00000
 1549   98 LEU  HD11 -42.45698  30.32250 -31.04852 1S   116    0.00000
 1550   98 LEU  HD12 -42.86254  28.62125 -30.61982 1S   116    0.00000
 1551   98 LEU  HD13 -41.21577  29.25579 -30.29631 1S   116    0.00000
 1552   98 LEU  CD2  -41.77210  31.03941 -28.33216 1S   116    1.00000
 1553   98 LEU  HD21 -42.07284  31.31814 -27.30029 1S   116    0.00000
 1554   98 LEU  HD22 -41.77507  31.95311 -28.96330 1S   116    0.00000
 1555   98 LEU  HD23 -40.74052  30.63672 -28.29883 1S   116    0.00000
 1556   98 LEU  C    -45.28543  28.31492 -28.77253 1S   116    1.00000
 1557   98 LEU  O    -44.76706  27.31621 -29.25705 1S   116    1.00000
 1558   99 ASN  N    -45.92551  28.27242 -27.58364 1S   117    1.00000
 1559   99 ASN  HN   -46.33858  29.09407 -27.19205 1S   117    0.00000
 1560   99 ASN  CA   -46.02310  27.07208 -26.77846 1S   117    1.00000
 1561   99 ASN  HA   -45.02817  26.65854 -26.68046 1S   117    0.00000
 1562   99 ASN  CB   -46.60652  27.35162 -25.37138 1S   117    1.00000
 1563   99 ASN  HB1  -46.81367  26.39668 -24.84105 1S   117    0.00000
 1564   99 ASN  HB2  -47.55268  27.92559 -25.46372 1S   117    0.00000
 1565   99 ASN  CG   -45.59236  28.14386 -24.53426 1S   117    1.00000
 1566   99 ASN  OD1  -44.39941  28.20893 -24.84852 1S   117    1.00000
 1567   99 ASN  ND2  -46.08949  28.74894 -23.41485 1S   117    1.00000
 1568   99 ASN  HD21 -45.47206  29.26211 -22.82392 1S   117    0.00000
 1569   99 ASN  HD22 -47.06028  28.66474 -23.19007 1S   117    0.00000
 1570   99 ASN  C    -46.85767  26.01447 -27.46383 1S   117    1.00000
 1571   99 ASN  O    -46.57001  24.83015 -27.33148 1S   117    1.00000
 1572  100 THR  N    -47.87467  26.41627 -28.26084 1S   118    1.00000
 1573  100 THR  HN   -48.09977  27.38624 -28.33811 1S   118    0.00000
 1574  100 THR  CA   -48.68598  25.52087 -29.06722 1S   118    1.00000
 1575  100 THR  HA   -49.03178  24.72317 -28.42333 1S   118    0.00000
 1576  100 THR  CB   -49.89504  26.22799 -29.66404 1S   118    1.00000
 1577  100 THR  HB   -49.57763  27.13784 -30.21859 1S   118    0.00000
 1578  100 THR  OG1  -50.76773  26.63632 -28.61761 1S   118    1.00000
 1579  100 THR  HG1  -50.34707  27.39547 -28.20007 1S   118    0.00000
 1580  100 THR  CG2  -50.67902  25.30840 -30.62385 1S   118    1.00000
 1581  100 THR  HG21 -50.90645  24.33792 -30.13493 1S   118    0.00000
 1582  100 THR  HG22 -50.09760  25.11588 -31.54989 1S   118    0.00000
 1583  100 THR  HG23 -51.63516  25.78920 -30.92094 1S   118    0.00000
 1584  100 THR  C    -47.85373  24.88977 -30.16344 1S   118    1.00000
 1585  100 THR  O    -47.92188  23.68027 -30.37034 1S   118    1.00000
 1586  101 ILE  N    -47.01849  25.69097 -30.86761 1S   119    1.00000
 1587  101 ILE  HN   -47.00518  26.67607 -30.69910 1S   119    0.00000
 1588  101 ILE  CA   -46.09527  25.23816 -31.89457 1S   119    1.00000
 1589  101 ILE  HA   -46.66969  24.71972 -32.64972 1S   119    0.00000
 1590  101 ILE  CB   -45.37124  26.41130 -32.54537 1S   119    1.00000
 1591  101 ILE  HB   -45.03691  27.10853 -31.74328 1S   119    0.00000
 1592  101 ILE  CG2  -44.11415  25.96920 -33.33180 1S   119    1.00000
 1593  101 ILE  HG21 -44.35405  25.13140 -34.01829 1S   119    0.00000
 1594  101 ILE  HG22 -43.30756  25.65085 -32.63835 1S   119    0.00000
 1595  101 ILE  HG23 -43.71868  26.81235 -33.93384 1S   119    0.00000
 1596  101 ILE  CG1  -46.35940  27.17995 -33.44707 1S   119    1.00000
 1597  101 ILE  HG11 -47.33794  27.28005 -32.92919 1S   119    0.00000
 1598  101 ILE  HG12 -46.53493  26.60556 -34.38268 1S   119    0.00000
 1599  101 ILE  CD   -45.85876  28.58194 -33.78114 1S   119    1.00000
 1600  101 ILE  HD1  -44.98082  28.54080 -34.45944 1S   119    0.00000
 1601  101 ILE  HD2  -45.56590  29.11766 -32.85356 1S   119    0.00000
 1602  101 ILE  HD3  -46.66473  29.16196 -34.27457 1S   119    0.00000
 1603  101 ILE  C    -45.10097  24.25595 -31.32709 1S   119    1.00000
 1604  101 ILE  O    -44.89132  23.19173 -31.90398 1S   119    1.00000
 1605  102 LEU  N    -44.49279  24.57768 -30.16099 1S   120    1.00000
 1606  102 LEU  HN   -44.68128  25.45326 -29.71665 1S   120    0.00000
 1607  102 LEU  CA   -43.53068  23.73539 -29.48355 1S   120    1.00000
 1608  102 LEU  HA   -42.71968  23.54678 -30.17156 1S   120    0.00000
 1609  102 LEU  CB   -42.99590  24.38505 -28.18623 1S   120    1.00000
 1610  102 LEU  HB1  -42.41052  23.63767 -27.60447 1S   120    0.00000
 1611  102 LEU  HB2  -43.85836  24.70028 -27.55877 1S   120    0.00000
 1612  102 LEU  CG   -42.07859  25.60545 -28.42074 1S   120    1.00000
 1613  102 LEU  HG   -42.62096  26.34312 -29.05109 1S   120    0.00000
 1614  102 LEU  CD1  -41.74810  26.30300 -27.08909 1S   120    1.00000
 1615  102 LEU  HD11 -41.20183  25.60836 -26.41648 1S   120    0.00000
 1616  102 LEU  HD12 -42.68099  26.62882 -26.58194 1S   120    0.00000
 1617  102 LEU  HD13 -41.11467  27.19675 -27.26916 1S   120    0.00000
 1618  102 LEU  CD2  -40.79712  25.22284 -29.17961 1S   120    1.00000
 1619  102 LEU  HD21 -41.03033  24.92277 -30.22268 1S   120    0.00000
 1620  102 LEU  HD22 -40.28854  24.37709 -28.67074 1S   120    0.00000
 1621  102 LEU  HD23 -40.10215  26.08737 -29.21363 1S   120    0.00000
 1622  102 LEU  C    -44.12574  22.40202 -29.11946 1S   120    1.00000
 1623  102 LEU  O    -43.51017  21.36465 -29.35715 1S   120    1.00000
 1624  103 ASN  N    -45.36682  22.40760 -28.57640 1S   121    1.00000
 1625  103 ASN  HN   -45.83816  23.27010 -28.39836 1S   121    0.00000
 1626  103 ASN  CA   -46.10713  21.21489 -28.23284 1S   121    1.00000
 1627  103 ASN  HA   -45.48736  20.62636 -27.56859 1S   121    0.00000
 1628  103 ASN  CB   -47.47517  21.52276 -27.56925 1S   121    1.00000
 1629  103 ASN  HB1  -48.22645  20.73607 -27.80344 1S   121    0.00000
 1630  103 ASN  HB2  -47.87134  22.49399 -27.92918 1S   121    0.00000
 1631  103 ASN  CG   -47.31265  21.53117 -26.04652 1S   121    1.00000
 1632  103 ASN  OD1  -47.56580  20.51253 -25.39518 1S   121    1.00000
 1633  103 ASN  ND2  -46.87497  22.68813 -25.47415 1S   121    1.00000
 1634  103 ASN  HD21 -46.68717  23.48660 -26.05157 1S   121    0.00000
 1635  103 ASN  HD22 -46.74828  22.73135 -24.48643 1S   121    0.00000
 1636  103 ASN  C    -46.34984  20.36689 -29.44804 1S   121    1.00000
 1637  103 ASN  O    -46.05719  19.17882 -29.41702 1S   121    1.00000
 1638  104 THR  N    -46.85020  20.95830 -30.55578 1S   122    1.00000
 1639  104 THR  HN   -47.02906  21.94096 -30.57010 1S   122    0.00000
 1640  104 THR  CA   -47.20841  20.23600 -31.76000 1S   122    1.00000
 1641  104 THR  HA   -47.89758  19.45645 -31.46275 1S   122    0.00000
 1642  104 THR  CB   -47.90248  21.10979 -32.79077 1S   122    1.00000
 1643  104 THR  HB   -47.24891  21.95749 -33.09396 1S   122    0.00000
 1644  104 THR  OG1  -49.09668  21.64588 -32.23365 1S   122    1.00000
 1645  104 THR  HG1  -48.82359  22.31378 -31.59743 1S   122    0.00000
 1646  104 THR  CG2  -48.27851  20.27978 -34.03484 1S   122    1.00000
 1647  104 THR  HG21 -48.83621  19.36483 -33.74345 1S   122    0.00000
 1648  104 THR  HG22 -47.36622  19.97287 -34.58407 1S   122    0.00000
 1649  104 THR  HG23 -48.90825  20.87651 -34.72777 1S   122    0.00000
 1650  104 THR  C    -46.00654  19.55294 -32.36337 1S   122    1.00000
 1651  104 THR  O    -46.06333  18.35811 -32.62707 1S   122    1.00000
 1652  105 MET  N    -44.86809  20.26422 -32.54123 1S   123    1.00000
 1653  105 MET  HN   -44.82267  21.23594 -32.31196 1S   123    0.00000
 1654  105 MET  CA   -43.64743  19.68442 -33.06849 1S   123    1.00000
 1655  105 MET  HA   -43.87862  19.29276 -34.04831 1S   123    0.00000
 1656  105 MET  CB   -42.50736  20.71530 -33.19717 1S   123    1.00000
 1657  105 MET  HB1  -41.57061  20.19078 -33.49538 1S   123    0.00000
 1658  105 MET  HB2  -42.33171  21.19614 -32.20960 1S   123    0.00000
 1659  105 MET  CG   -42.79144  21.79344 -34.25353 1S   123    1.00000
 1660  105 MET  HG1  -43.57996  22.47742 -33.87682 1S   123    0.00000
 1661  105 MET  HG2  -43.20585  21.28449 -35.15169 1S   123    0.00000
 1662  105 MET  SD   -41.33068  22.74816 -34.75950 1S   123    1.00000
 1663  105 MET  CE   -40.88195  23.44304 -33.14287 1S   123    1.00000
 1664  105 MET  HE1  -40.54953  22.65293 -32.43799 1S   123    0.00000
 1665  105 MET  HE2  -41.74275  23.97286 -32.68323 1S   123    0.00000
 1666  105 MET  HE3  -40.04625  24.16671 -33.24775 1S   123    0.00000
 1667  105 MET  C    -43.12262  18.54074 -32.23049 1S   123    1.00000
 1668  105 MET  O    -42.60673  17.56184 -32.76712 1S   123    1.00000
 1669  106 SER  N    -43.27837  18.62962 -30.88972 1S   124    1.00000
 1670  106 SER  HN   -43.70153  19.43479 -30.47734 1S   124    0.00000
 1671  106 SER  CA   -42.86635  17.59784 -29.96611 1S   124    1.00000
 1672  106 SER  HA   -41.84163  17.34451 -30.20360 1S   124    0.00000
 1673  106 SER  CB   -42.92515  18.08275 -28.49545 1S   124    1.00000
 1674  106 SER  HB1  -43.97145  18.31811 -28.20777 1S   124    0.00000
 1675  106 SER  HB2  -42.32220  19.01094 -28.39393 1S   124    0.00000
 1676  106 SER  OG   -42.40535  17.11241 -27.59075 1S   124    1.00000
 1677  106 SER  HG1  -41.44859  17.11424 -27.70901 1S   124    0.00000
 1678  106 SER  C    -43.71082  16.35165 -30.12920 1S   124    1.00000
 1679  106 SER  O    -43.16958  15.24724 -30.16677 1S   124    1.00000
 1680  107 THR  N    -45.05844  16.49000 -30.24666 1S   125    1.00000
 1681  107 THR  HN   -45.50086  17.38575 -30.22551 1S   125    0.00000
 1682  107 THR  CA   -45.93617  15.33929 -30.35415 1S   125    1.00000
 1683  107 THR  HA   -45.56226  14.62253 -29.63794 1S   125    0.00000
 1684  107 THR  CB   -47.40727  15.53460 -29.95173 1S   125    1.00000
 1685  107 THR  HB   -47.78743  14.54825 -29.59681 1S   125    0.00000
 1686  107 THR  OG1  -48.25682  15.96638 -31.01190 1S   125    1.00000
 1687  107 THR  HG1  -49.15235  15.90189 -30.67150 1S   125    0.00000
 1688  107 THR  CG2  -47.53524  16.54478 -28.79790 1S   125    1.00000
 1689  107 THR  HG21 -47.66048  17.56729 -29.20648 1S   125    0.00000
 1690  107 THR  HG22 -46.65001  16.52484 -28.12935 1S   125    0.00000
 1691  107 THR  HG23 -48.43956  16.32794 -28.19255 1S   125    0.00000
 1692  107 THR  C    -45.81016  14.69654 -31.71618 1S   125    1.00000
 1693  107 THR  O    -45.89466  13.48149 -31.82467 1S   125    1.00000
 1694  108 ILE  N    -45.56544  15.49073 -32.78801 1S   126    1.00000
 1695  108 ILE  HN   -45.52689  16.48415 -32.68375 1S   126    0.00000
 1696  108 ILE  CA   -45.34913  14.99466 -34.13593 1S   126    1.00000
 1697  108 ILE  HA   -46.19724  14.37728 -34.39751 1S   126    0.00000
 1698  108 ILE  CB   -45.23198  16.12158 -35.16588 1S   126    1.00000
 1699  108 ILE  HB   -44.52371  16.88770 -34.77671 1S   126    0.00000
 1700  108 ILE  CG2  -44.67698  15.59501 -36.50888 1S   126    1.00000
 1701  108 ILE  HG21 -45.28292  14.73540 -36.86630 1S   126    0.00000
 1702  108 ILE  HG22 -43.62138  15.27911 -36.39076 1S   126    0.00000
 1703  108 ILE  HG23 -44.67860  16.37714 -37.29249 1S   126    0.00000
 1704  108 ILE  CG1  -46.60548  16.79961 -35.37992 1S   126    1.00000
 1705  108 ILE  HG11 -46.98960  17.17842 -34.41222 1S   126    0.00000
 1706  108 ILE  HG12 -47.33380  16.04331 -35.74458 1S   126    0.00000
 1707  108 ILE  CD   -46.55178  17.96219 -36.37539 1S   126    1.00000
 1708  108 ILE  HD1  -46.40748  17.58503 -37.40738 1S   126    0.00000
 1709  108 ILE  HD2  -45.71142  18.64458 -36.12760 1S   126    0.00000
 1710  108 ILE  HD3  -47.50006  18.53816 -36.35566 1S   126    0.00000
 1711  108 ILE  C    -44.11995  14.11233 -34.16505 1S   126    1.00000
 1712  108 ILE  O    -44.12537  13.05729 -34.79266 1S   126    1.00000
 1713  109 TYR  N    -43.04591  14.50972 -33.44807 1S   127    1.00000
 1714  109 TYR  HN   -43.06053  15.36719 -32.93702 1S   127    0.00000
 1715  109 TYR  CA   -41.81402  13.76147 -33.36673 1S   127    1.00000
 1716  109 TYR  HA   -41.50803  13.52570 -34.37767 1S   127    0.00000
 1717  109 TYR  CB   -40.71817  14.62101 -32.67924 1S   127    1.00000
 1718  109 TYR  HB1  -41.00016  14.85748 -31.63193 1S   127    0.00000
 1719  109 TYR  HB2  -40.61352  15.58115 -33.23062 1S   127    0.00000
 1720  109 TYR  CG   -39.37328  13.94629 -32.68142 1S   127    1.00000
 1721  109 TYR  CD1  -38.54925  14.02359 -33.81232 1S   127    1.00000
 1722  109 TYR  HD1  -38.87106  14.57918 -34.68163 1S   127    0.00000
 1723  109 TYR  CE1  -37.30984  13.38029 -33.82054 1S   127    1.00000
 1724  109 TYR  HE1  -36.68317  13.45988 -34.68266 1S   127    0.00000
 1725  109 TYR  CZ   -36.87815  12.64722 -32.71327 1S   127    1.00000
 1726  109 TYR  OH   -35.61585  12.01541 -32.74423 1S   127    1.00000
 1727  109 TYR  HH   -35.30522  12.02641 -33.65228 1S   127    0.00000
 1728  109 TYR  CD2  -38.93180  13.21787 -31.56144 1S   127    1.00000
 1729  109 TYR  HD2  -39.55992  13.14897 -30.68584 1S   127    0.00000
 1730  109 TYR  CE2  -37.69161  12.56676 -31.57757 1S   127    1.00000
 1731  109 TYR  HE2  -37.36311  12.00980 -30.71246 1S   127    0.00000
 1732  109 TYR  C    -42.01948  12.45798 -32.61716 1S   127    1.00000
 1733  109 TYR  O    -41.59743  11.39922 -33.07615 1S   127    1.00000
 1734  110 SER  N    -42.67419  12.50785 -31.43699 1S   128    1.00000
 1735  110 SER  HN   -43.04353  13.36709 -31.08723 1S   128    0.00000
 1736  110 SER  CA   -42.78992  11.36227 -30.56033 1S   128    1.00000
 1737  110 SER  HA   -41.83529  10.85357 -30.56948 1S   128    0.00000
 1738  110 SER  CB   -43.04783  11.77529 -29.08702 1S   128    1.00000
 1739  110 SER  HB1  -42.21297  12.42462 -28.74357 1S   128    0.00000
 1740  110 SER  HB2  -43.07264  10.87508 -28.43608 1S   128    0.00000
 1741  110 SER  OG   -44.26287  12.49875 -28.92535 1S   128    1.00000
 1742  110 SER  HG1  -44.03949  13.42710 -29.03942 1S   128    0.00000
 1743  110 SER  C    -43.82908  10.35620 -31.02490 1S   128    1.00000
 1744  110 SER  O    -43.71162   9.17336 -30.70979 1S   128    1.00000
 1745  111 THR  N    -44.86408  10.79736 -31.78502 1S   129    1.00000
 1746  111 THR  HN   -44.94402  11.76439 -32.02207 1S   129    0.00000
 1747  111 THR  CA   -45.95848   9.94613 -32.22710 1S   129    1.00000
 1748  111 THR  HA   -45.89653   9.00375 -31.70156 1S   129    0.00000
 1749  111 THR  CB   -47.35248  10.51789 -31.93896 1S   129    1.00000
 1750  111 THR  HB   -48.11218   9.72886 -32.14218 1S   129    0.00000
 1751  111 THR  OG1  -47.69089  11.63939 -32.75208 1S   129    1.00000
 1752  111 THR  HG1  -47.06773  12.33542 -32.51474 1S   129    0.00000
 1753  111 THR  CG2  -47.47157  10.91727 -30.45467 1S   129    1.00000
 1754  111 THR  HG21 -46.75962  11.72859 -30.19676 1S   129    0.00000
 1755  111 THR  HG22 -47.26045  10.04536 -29.80149 1S   129    0.00000
 1756  111 THR  HG23 -48.49874  11.28099 -30.23894 1S   129    0.00000
 1757  111 THR  C    -45.87140   9.63024 -33.70470 1S   129    1.00000
 1758  111 THR  O    -46.70546   8.88212 -34.21668 1S   129    1.00000
 1759  112 GLY  N    -44.88070  10.20173 -34.43262 1S   130    1.00000
 1760  112 GLY  HN   -44.19481  10.78634 -34.00416 1S   130    0.00000
 1761  112 GLY  CA   -44.80156  10.10333 -35.87707 1S   130    1.00000
 1762  112 GLY  HA1  -43.99136  10.74281 -36.19483 1S   130    0.00000
 1763  112 GLY  HA2  -45.75941  10.39270 -36.28760 1S   130    0.00000
 1764  112 GLY  C    -44.48410   8.70259 -36.30260 1S   130    1.00000
 1765  112 GLY  O    -43.63440   8.04476 -35.70425 1S   130    1.00000
 1766  113 LYS  N    -45.19643   8.20897 -37.33959 1S   131    1.00000
 1767  113 LYS  HN   -45.84446   8.76689 -37.85312 1S   131    0.00000
 1768  113 LYS  CA   -45.10292   6.83062 -37.74180 1S   131    1.00000
 1769  113 LYS  HA   -44.14855   6.43350 -37.42553 1S   131    0.00000
 1770  113 LYS  CB   -46.23446   5.94108 -37.16990 1S   131    1.00000
 1771  113 LYS  HB1  -46.09356   5.87177 -36.07744 1S   131    0.00000
 1772  113 LYS  HB2  -46.13851   4.90922 -37.57288 1S   131    0.00000
 1773  113 LYS  CG   -47.67022   6.44504 -37.38738 1S   131    1.00000
 1774  113 LYS  HG1  -47.83187   6.62331 -38.47357 1S   131    0.00000
 1775  113 LYS  HG2  -47.81347   7.41268 -36.85947 1S   131    0.00000
 1776  113 LYS  CD   -48.72158   5.42690 -36.90812 1S   131    1.00000
 1777  113 LYS  HD1  -48.52343   4.46599 -37.43362 1S   131    0.00000
 1778  113 LYS  HD2  -49.73044   5.77321 -37.22327 1S   131    0.00000
 1779  113 LYS  CE   -48.73188   5.15106 -35.39408 1S   131    1.00000
 1780  113 LYS  HE1  -47.72686   4.86303 -35.02367 1S   131    0.00000
 1781  113 LYS  HE2  -49.44026   4.32451 -35.17120 1S   131    0.00000
 1782  113 LYS  NZ   -49.17944   6.33823 -34.62680 1S   131    1.00000
 1783  113 LYS  HZ1  -50.09423   6.66184 -35.00124 1S   131    0.00000
 1784  113 LYS  HZ2  -48.47816   7.10222 -34.71560 1S   131    0.00000
 1785  113 LYS  HZ3  -49.28884   6.08244 -33.62462 1S   131    0.00000
 1786  113 LYS  C    -45.13937   6.73513 -39.23301 1S   131    1.00000
 1787  113 LYS  O    -45.72128   7.57442 -39.91701 1S   131    1.00000
 1788  114 VAL  N    -44.49686   5.67060 -39.75878 1S   132    1.00000
 1789  114 VAL  HN   -44.01134   5.02605 -39.16920 1S   132    0.00000
 1790  114 VAL  CA   -44.50410   5.32942 -41.15729 1S   132    1.00000
 1791  114 VAL  HA   -45.21776   5.95051 -41.68176 1S   132    0.00000
 1792  114 VAL  CB   -43.14560   5.44405 -41.83534 1S   132    1.00000
 1793  114 VAL  HB   -43.22894   5.11566 -42.89775 1S   132    0.00000
 1794  114 VAL  CG1  -42.73747   6.92518 -41.82748 1S   132    1.00000
 1795  114 VAL  HG11 -42.65116   7.31577 -40.79228 1S   132    0.00000
 1796  114 VAL  HG12 -43.49287   7.52177 -42.37487 1S   132    0.00000
 1797  114 VAL  HG13 -41.75488   7.04626 -42.32505 1S   132    0.00000
 1798  114 VAL  CG2  -42.07156   4.58315 -41.14508 1S   132    1.00000
 1799  114 VAL  HG21 -42.30816   3.50163 -41.20940 1S   132    0.00000
 1800  114 VAL  HG22 -41.96795   4.86284 -40.07607 1S   132    0.00000
 1801  114 VAL  HG23 -41.09165   4.74537 -41.64363 1S   132    0.00000
 1802  114 VAL  C    -44.98684   3.91599 -41.22778 1S   132    1.00000
 1803  114 VAL  O    -44.65763   3.09532 -40.37706 1S   132    1.00000
 1804  115 CYS  N    -45.80437   3.59952 -42.24840 1S   133    1.00000
 1805  115 CYS  HN   -46.07350   4.27106 -42.93383 1S   133    0.00000
 1806  115 CYS  CA   -46.33686   2.27412 -42.43343 1S   133    1.00000
 1807  115 CYS  HA   -45.99456   1.61831 -41.65359 1S   133    0.00000
 1808  115 CYS  CB   -47.88322   2.25148 -42.46875 1S   133    1.00000
 1809  115 CYS  HB1  -48.24642   1.20199 -42.41588 1S   133    0.00000
 1810  115 CYS  HB2  -48.23384   2.68012 -43.43248 1S   133    0.00000
 1811  115 CYS  SG   -48.59857   3.25126 -41.11513 1S   133    1.00000
 1812  115 CYS  C    -45.73870   1.78667 -43.71235 1S   133    1.00000
 1813  115 CYS  O    -45.47271   2.57879 -44.61642 1S   133    1.00000
 1814  116 ASN  N    -45.46623   0.46344 -43.80972 1S   134    1.00000
 1815  116 ASN  HN   -45.71770  -0.18291 -43.09040 1S   134    0.00000
 1816  116 ASN  CA   -44.74631  -0.09363 -44.93453 1S   134    1.00000
 1817  116 ASN  HA   -43.89268   0.54553 -45.09227 1S   134    0.00000
 1818  116 ASN  CB   -44.19726  -1.52238 -44.65193 1S   134    1.00000
 1819  116 ASN  HB1  -43.59843  -1.49465 -43.71604 1S   134    0.00000
 1820  116 ASN  HB2  -43.52274  -1.84929 -45.46904 1S   134    0.00000
 1821  116 ASN  CG   -45.32328  -2.54197 -44.46189 1S   134    1.00000
 1822  116 ASN  OD1  -45.97968  -2.56851 -43.41928 1S   134    1.00000
 1823  116 ASN  ND2  -45.55462  -3.37809 -45.51319 1S   134    1.00000
 1824  116 ASN  HD21 -46.29365  -4.04618 -45.45324 1S   134    0.00000
 1825  116 ASN  HD22 -45.00372  -3.30661 -46.34641 1S   134    0.00000
 1826  116 ASN  C    -45.62779  -0.03890 -46.17042 1S   134    1.00000
 1827  116 ASN  O    -46.84946  -0.07283 -46.01619 1S   134    1.00000
 1828  117 PRO  N    -45.10032   0.06730 -47.39183 1S   135    1.00000
 1829  117 PRO  CD   -43.66240   0.12342 -47.66422 1S   135    1.00000
 1830  117 PRO  HD1  -43.13101  -0.74959 -47.23083 1S   135    0.00000
 1831  117 PRO  HD2  -43.26266   1.07020 -47.24581 1S   135    0.00000
 1832  117 PRO  CA   -45.88997   0.39530 -48.57431 1S   135    1.00000
 1833  117 PRO  HA   -46.56955   1.20132 -48.33449 1S   135    0.00000
 1834  117 PRO  CB   -44.83887   0.81128 -49.62260 1S   135    1.00000
 1835  117 PRO  HB1  -44.69274   1.91275 -49.56113 1S   135    0.00000
 1836  117 PRO  HB2  -45.11625   0.54982 -50.66324 1S   135    0.00000
 1837  117 PRO  CG   -43.54454   0.12253 -49.18478 1S   135    1.00000
 1838  117 PRO  HG1  -43.53393  -0.92576 -49.55686 1S   135    0.00000
 1839  117 PRO  HG2  -42.63863   0.65391 -49.53968 1S   135    0.00000
 1840  117 PRO  C    -46.71322  -0.78238 -49.05648 1S   135    1.00000
 1841  117 PRO  O    -47.28377  -0.68815 -50.14166 1S   135    1.00000
 1842  118 ASP  N    -46.79538  -1.88024 -48.27124 1S   136    1.00000
 1843  118 ASP  HN   -46.32012  -1.90356 -47.39638 1S   136    0.00000
 1844  118 ASP  CA   -47.51912  -3.07674 -48.61976 1S   136    1.00000
 1845  118 ASP  HA   -47.94130  -2.96479 -49.60912 1S   136    0.00000
 1846  118 ASP  CB   -46.61736  -4.33925 -48.60940 1S   136    1.00000
 1847  118 ASP  HB1  -47.14372  -5.18094 -49.10642 1S   136    0.00000
 1848  118 ASP  HB2  -46.37928  -4.64949 -47.57252 1S   136    0.00000
 1849  118 ASP  CG   -45.30832  -4.06310 -49.35073 1S   136    1.00000
 1850  118 ASP  OD1  -45.36865  -3.73219 -50.56372 1S   136    1.00000
 1851  118 ASP  OD2  -44.23304  -4.16863 -48.70183 1S   136    1.00000
 1852  118 ASP  C    -48.66258  -3.30297 -47.65479 1S   136    1.00000
 1853  118 ASP  O    -49.64354  -3.94791 -48.02003 1S   136    1.00000
 1854  119 ASN  N    -48.56822  -2.80214 -46.39515 1S   137    1.00000
 1855  119 ASN  HN   -47.80779  -2.22114 -46.11205 1S   137    0.00000
 1856  119 ASN  CA   -49.53401  -3.11682 -45.36342 1S   137    1.00000
 1857  119 ASN  HA   -50.42138  -3.53352 -45.81546 1S   137    0.00000
 1858  119 ASN  CB   -48.97994  -4.18207 -44.37800 1S   137    1.00000
 1859  119 ASN  HB1  -48.16076  -3.76020 -43.76470 1S   137    0.00000
 1860  119 ASN  HB2  -48.55799  -5.02121 -44.97314 1S   137    0.00000
 1861  119 ASN  CG   -50.07773  -4.75777 -43.47394 1S   137    1.00000
 1862  119 ASN  OD1  -51.26368  -4.45152 -43.63095 1S   137    1.00000
 1863  119 ASN  ND2  -49.65755  -5.62824 -42.50947 1S   137    1.00000
 1864  119 ASN  HD21 -48.67984  -5.82871 -42.41521 1S   137    0.00000
 1865  119 ASN  HD22 -50.32061  -6.02991 -41.88245 1S   137    0.00000
 1866  119 ASN  C    -49.87666  -1.82958 -44.63174 1S   137    1.00000
 1867  119 ASN  O    -49.09383  -1.39969 -43.78448 1S   137    1.00000
 1868  120 PRO  N    -51.02025  -1.18362 -44.89391 1S   138    1.00000
 1869  120 PRO  CD   -51.82697  -1.44193 -46.09318 1S   138    1.00000
 1870  120 PRO  HD1  -52.59984  -2.19736 -45.83481 1S   138    0.00000
 1871  120 PRO  HD2  -51.21215  -1.79783 -46.94891 1S   138    0.00000
 1872  120 PRO  CA   -51.34873   0.11244 -44.30588 1S   138    1.00000
 1873  120 PRO  HA   -50.50370   0.76817 -44.46469 1S   138    0.00000
 1874  120 PRO  CB   -52.60423   0.56519 -45.07340 1S   138    1.00000
 1875  120 PRO  HB1  -52.66350   1.66952 -45.15428 1S   138    0.00000
 1876  120 PRO  HB2  -53.53015   0.18186 -44.58903 1S   138    0.00000
 1877  120 PRO  CG   -52.46893  -0.10208 -46.44155 1S   138    1.00000
 1878  120 PRO  HG1  -53.44125  -0.21937 -46.96031 1S   138    0.00000
 1879  120 PRO  HG2  -51.77373   0.48720 -47.07913 1S   138    0.00000
 1880  120 PRO  C    -51.65214   0.07931 -42.82062 1S   138    1.00000
 1881  120 PRO  O    -51.86304   1.15132 -42.25612 1S   138    1.00000
 1882  121 GLN  N    -51.69969  -1.11050 -42.17543 1S   139    1.00000
 1883  121 GLN  HN   -51.54587  -1.96587 -42.66411 1S   139    0.00000
 1884  121 GLN  CA   -51.99792  -1.22781 -40.76399 1S   139    1.00000
 1885  121 GLN  HA   -52.34300  -0.27430 -40.38874 1S   139    0.00000
 1886  121 GLN  CB   -53.12387  -2.25263 -40.47951 1S   139    1.00000
 1887  121 GLN  HB1  -54.05811  -1.88117 -40.95878 1S   139    0.00000
 1888  121 GLN  HB2  -53.31659  -2.25764 -39.38549 1S   139    0.00000
 1889  121 GLN  CG   -52.85141  -3.66815 -41.02864 1S   139    1.00000
 1890  121 GLN  HG1  -51.77844  -3.76785 -41.29236 1S   139    0.00000
 1891  121 GLN  HG2  -53.44995  -3.82015 -41.95292 1S   139    0.00000
 1892  121 GLN  CD   -53.17169  -4.76911 -40.01002 1S   139    1.00000
 1893  121 GLN  OE1  -53.21175  -4.54704 -38.79631 1S   139    1.00000
 1894  121 GLN  NE2  -53.37339  -6.01540 -40.53385 1S   139    1.00000
 1895  121 GLN  HE21 -53.56102  -6.77791 -39.91941 1S   139    0.00000
 1896  121 GLN  HE22 -53.32795  -6.15442 -41.52335 1S   139    0.00000
 1897  121 GLN  C    -50.76721  -1.58971 -39.95748 1S   139    1.00000
 1898  121 GLN  O    -50.77410  -1.44445 -38.73643 1S   139    1.00000
 1899  122 GLU  N    -49.67385  -2.05495 -40.61014 1S   140    1.00000
 1900  122 GLU  HN   -49.66397  -2.14589 -41.60341 1S   140    0.00000
 1901  122 GLU  CA   -48.43000  -2.39578 -39.94803 1S   140    1.00000
 1902  122 GLU  HA   -48.60573  -2.60438 -38.90137 1S   140    0.00000
 1903  122 GLU  CB   -47.76696  -3.62881 -40.60557 1S   140    1.00000
 1904  122 GLU  HB1  -47.84118  -3.49281 -41.70568 1S   140    0.00000
 1905  122 GLU  HB2  -48.36794  -4.52540 -40.33386 1S   140    0.00000
 1906  122 GLU  CG   -46.29020  -3.90290 -40.24987 1S   140    1.00000
 1907  122 GLU  HG1  -46.19418  -4.12645 -39.16722 1S   140    0.00000
 1908  122 GLU  HG2  -45.66142  -3.01868 -40.48701 1S   140    0.00000
 1909  122 GLU  CD   -45.74576  -5.08065 -41.06513 1S   140    1.00000
 1910  122 GLU  OE1  -44.81560  -5.75827 -40.55336 1S   140    1.00000
 1911  122 GLU  OE2  -46.23705  -5.31614 -42.20190 1S   140    1.00000
 1912  122 GLU  C    -47.52612  -1.19898 -40.06340 1S   140    1.00000
 1913  122 GLU  O    -47.08692  -0.84181 -41.15573 1S   140    1.00000
 1914  123 CYS  N    -47.25527  -0.52972 -38.91764 1S   141    1.00000
 1915  123 CYS  HN   -47.60287  -0.84174 -38.03732 1S   141    0.00000
 1916  123 CYS  CA   -46.53077   0.71882 -38.89959 1S   141    1.00000
 1917  123 CYS  HA   -46.06959   0.87773 -39.85719 1S   141    0.00000
 1918  123 CYS  CB   -47.44068   1.92742 -38.56058 1S   141    1.00000
 1919  123 CYS  HB1  -46.87083   2.87406 -38.68016 1S   141    0.00000
 1920  123 CYS  HB2  -47.74799   1.85300 -37.49411 1S   141    0.00000
 1921  123 CYS  SG   -48.96031   1.97538 -39.57355 1S   141    1.00000
 1922  123 CYS  C    -45.41459   0.64637 -37.89516 1S   141    1.00000
 1923  123 CYS  O    -45.41086  -0.20057 -37.00380 1S   141    1.00000
 1924  124 LEU  N    -44.42693   1.55719 -38.04406 1S   142    1.00000
 1925  124 LEU  HN   -44.44814   2.20526 -38.80606 1S   142    0.00000
 1926  124 LEU  CA   -43.29033   1.69108 -37.17035 1S   142    1.00000
 1927  124 LEU  HA   -43.41647   1.06961 -36.29542 1S   142    0.00000
 1928  124 LEU  CB   -41.94912   1.38173 -37.88099 1S   142    1.00000
 1929  124 LEU  HB1  -41.10322   1.59997 -37.19327 1S   142    0.00000
 1930  124 LEU  HB2  -41.84309   2.05322 -38.76313 1S   142    0.00000
 1931  124 LEU  CG   -41.80168  -0.07534 -38.37090 1S   142    1.00000
 1932  124 LEU  HG   -42.65431  -0.29736 -39.05402 1S   142    0.00000
 1933  124 LEU  CD1  -40.50637  -0.23339 -39.18604 1S   142    1.00000
 1934  124 LEU  HD11 -39.62199  -0.01375 -38.55070 1S   142    0.00000
 1935  124 LEU  HD12 -40.50382   0.46844 -40.04574 1S   142    0.00000
 1936  124 LEU  HD13 -40.41635  -1.27007 -39.57372 1S   142    0.00000
 1937  124 LEU  CD2  -41.84828  -1.09221 -37.21526 1S   142    1.00000
 1938  124 LEU  HD21 -42.81141  -1.03058 -36.66796 1S   142    0.00000
 1939  124 LEU  HD22 -41.02047  -0.90177 -36.50126 1S   142    0.00000
 1940  124 LEU  HD23 -41.74146  -2.12457 -37.61007 1S   142    0.00000
 1941  124 LEU  C    -43.21390   3.12325 -36.72611 1S   142    1.00000
 1942  124 LEU  O    -43.40012   4.03924 -37.52317 1S   142    1.00000
 1943  125 LEU  N    -42.88781   3.33618 -35.42890 1S   143    1.00000
 1944  125 LEU  HN   -42.79274   2.57272 -34.79671 1S   143    0.00000
 1945  125 LEU  CA   -42.50797   4.62551 -34.89376 1S   143    1.00000
 1946  125 LEU  HA   -42.98302   5.41474 -35.45808 1S   143    0.00000
 1947  125 LEU  CB   -42.78581   4.76988 -33.36888 1S   143    1.00000
 1948  125 LEU  HB1  -42.32269   5.70701 -32.98789 1S   143    0.00000
 1949  125 LEU  HB2  -42.30045   3.91869 -32.84010 1S   143    0.00000
 1950  125 LEU  CG   -44.26903   4.81404 -32.93501 1S   143    1.00000
 1951  125 LEU  HG   -44.74371   3.85022 -33.22852 1S   143    0.00000
 1952  125 LEU  CD1  -44.36570   4.97065 -31.40737 1S   143    1.00000
 1953  125 LEU  HD11 -43.88109   5.92332 -31.09930 1S   143    0.00000
 1954  125 LEU  HD12 -43.85256   4.13250 -30.89230 1S   143    0.00000
 1955  125 LEU  HD13 -45.42763   5.00017 -31.08528 1S   143    0.00000
 1956  125 LEU  CD2  -45.04500   5.95921 -33.59701 1S   143    1.00000
 1957  125 LEU  HD21 -44.80996   6.00597 -34.67316 1S   143    0.00000
 1958  125 LEU  HD22 -44.75863   6.93368 -33.14897 1S   143    0.00000
 1959  125 LEU  HD23 -46.13871   5.81605 -33.47229 1S   143    0.00000
 1960  125 LEU  C    -41.01984   4.75164 -35.06711 1S   143    1.00000
 1961  125 LEU  O    -40.34975   3.79755 -35.45587 1S   143    1.00000
 1962  126 LEU  N    -40.45682   5.93988 -34.73848 1S   144    1.00000
 1963  126 LEU  HN   -41.01981   6.72048 -34.47754 1S   144    0.00000
 1964  126 LEU  CA   -39.02805   6.15891 -34.69993 1S   144    1.00000
 1965  126 LEU  HA   -38.64539   5.93262 -35.68142 1S   144    0.00000
 1966  126 LEU  CB   -38.66084   7.61542 -34.33413 1S   144    1.00000
 1967  126 LEU  HB1  -39.12865   7.88486 -33.36228 1S   144    0.00000
 1968  126 LEU  HB2  -39.09814   8.28076 -35.10528 1S   144    0.00000
 1969  126 LEU  CG   -37.14189   7.90654 -34.26017 1S   144    1.00000
 1970  126 LEU  HG   -36.68823   7.22031 -33.50828 1S   144    0.00000
 1971  126 LEU  CD1  -36.42842   7.66420 -35.60206 1S   144    1.00000
 1972  126 LEU  HD11 -36.92763   8.23122 -36.41588 1S   144    0.00000
 1973  126 LEU  HD12 -36.43402   6.58468 -35.85557 1S   144    0.00000
 1974  126 LEU  HD13 -35.36938   7.99270 -35.53703 1S   144    0.00000
 1975  126 LEU  CD2  -36.87040   9.32793 -33.75447 1S   144    1.00000
 1976  126 LEU  HD21 -37.34699   9.48859 -32.76415 1S   144    0.00000
 1977  126 LEU  HD22 -37.26586  10.08023 -34.46736 1S   144    0.00000
 1978  126 LEU  HD23 -35.77629   9.48461 -33.64619 1S   144    0.00000
 1979  126 LEU  C    -38.37484   5.23432 -33.70389 1S   144    1.00000
 1980  126 LEU  O    -37.47311   4.47877 -34.05259 1S   144    1.00000
 1981  127 GLU  N    -38.84047   5.26647 -32.44046 1S   145    1.00000
 1982  127 GLU  HN   -39.59395   5.86382 -32.17804 1S   145    0.00000
 1983  127 GLU  CA   -38.30440   4.44390 -31.38965 1S   145    1.00000
 1984  127 GLU  HA   -37.43166   3.91922 -31.74318 1S   145    0.00000
 1985  127 GLU  CB   -37.88759   5.32051 -30.18220 1S   145    1.00000
 1986  127 GLU  HB1  -38.74431   5.97044 -29.89629 1S   145    0.00000
 1987  127 GLU  HB2  -37.06977   5.99577 -30.52039 1S   145    0.00000
 1988  127 GLU  CG   -37.41187   4.57430 -28.91684 1S   145    1.00000
 1989  127 GLU  HG1  -38.25911   4.00016 -28.48520 1S   145    0.00000
 1990  127 GLU  HG2  -37.08458   5.32188 -28.16226 1S   145    0.00000
 1991  127 GLU  CD   -36.24677   3.61783 -29.17872 1S   145    1.00000
 1992  127 GLU  OE1  -35.40435   3.90647 -30.06752 1S   145    1.00000
 1993  127 GLU  OE2  -36.18913   2.57262 -28.47853 1S   145    1.00000
 1994  127 GLU  C    -39.39237   3.46595 -31.00967 1S   145    1.00000
 1995  127 GLU  O    -40.46427   3.92255 -30.61040 1S   145    1.00000
 1996  128 PRO  N    -39.22985   2.14292 -31.09078 1S   146    1.00000
 1997  128 PRO  CD   -40.25813   1.25468 -30.54713 1S   146    1.00000
 1998  128 PRO  HD1  -41.21711   1.39062 -31.09205 1S   146    0.00000
 1999  128 PRO  HD2  -40.39419   1.47927 -29.46617 1S   146    0.00000
 2000  128 PRO  CA   -38.00944   1.42209 -31.43929 1S   146    1.00000
 2001  128 PRO  HA   -37.13821   1.95416 -31.09208 1S   146    0.00000
 2002  128 PRO  CB   -38.19050   0.06950 -30.73230 1S   146    1.00000
 2003  128 PRO  HB1  -37.83589   0.16741 -29.68245 1S   146    0.00000
 2004  128 PRO  HB2  -37.64088  -0.76424 -31.21498 1S   146    0.00000
 2005  128 PRO  CG   -39.70526  -0.15896 -30.72772 1S   146    1.00000
 2006  128 PRO  HG1  -40.02674  -0.56243 -31.71283 1S   146    0.00000
 2007  128 PRO  HG2  -40.02615  -0.84798 -29.92173 1S   146    0.00000
 2008  128 PRO  C    -37.85231   1.15605 -32.91827 1S   146    1.00000
 2009  128 PRO  O    -36.77235   0.71016 -33.29632 1S   146    1.00000
 2010  129 GLY  N    -38.89479   1.35020 -33.75974 1S   147    1.00000
 2011  129 GLY  HN   -39.72890   1.79700 -33.44748 1S   147    0.00000
 2012  129 GLY  CA   -38.97647   0.70609 -35.05868 1S   147    1.00000
 2013  129 GLY  HA1  -39.93572   0.97182 -35.47334 1S   147    0.00000
 2014  129 GLY  HA2  -38.87380  -0.35874 -34.89984 1S   147    0.00000
 2015  129 GLY  C    -37.92190   1.12034 -36.04230 1S   147    1.00000
 2016  129 GLY  O    -37.14576   0.29439 -36.51795 1S   147    1.00000
 2017  130 LEU  N    -37.87184   2.42247 -36.38114 1S   148    1.00000
 2018  130 LEU  HN   -38.50597   3.08421 -35.98364 1S   148    0.00000
 2019  130 LEU  CA   -36.96392   2.93191 -37.37847 1S   148    1.00000
 2020  130 LEU  HA   -36.97202   2.25063 -38.21714 1S   148    0.00000
 2021  130 LEU  CB   -37.36788   4.33128 -37.87340 1S   148    1.00000
 2022  130 LEU  HB1  -36.63713   4.66138 -38.64170 1S   148    0.00000
 2023  130 LEU  HB2  -37.32469   5.04684 -37.02699 1S   148    0.00000
 2024  130 LEU  CG   -38.77440   4.39049 -38.50718 1S   148    1.00000
 2025  130 LEU  HG   -39.51668   4.04685 -37.75294 1S   148    0.00000
 2026  130 LEU  CD1  -39.14070   5.83767 -38.87314 1S   148    1.00000
 2027  130 LEU  HD11 -38.43511   6.22454 -39.63643 1S   148    0.00000
 2028  130 LEU  HD12 -39.08648   6.48865 -37.97502 1S   148    0.00000
 2029  130 LEU  HD13 -40.16962   5.89098 -39.28419 1S   148    0.00000
 2030  130 LEU  CD2  -38.88783   3.45960 -39.72742 1S   148    1.00000
 2031  130 LEU  HD21 -38.70390   2.40328 -39.44447 1S   148    0.00000
 2032  130 LEU  HD22 -38.15547   3.75734 -40.50586 1S   148    0.00000
 2033  130 LEU  HD23 -39.90427   3.51281 -40.15874 1S   148    0.00000
 2034  130 LEU  C    -35.54931   2.97777 -36.87139 1S   148    1.00000
 2035  130 LEU  O    -34.62307   2.71633 -37.62814 1S   148    1.00000
 2036  131 ASN  N    -35.34036   3.26058 -35.56689 1S   149    1.00000
 2037  131 ASN  HN   -36.10477   3.49894 -34.96823 1S   149    0.00000
 2038  131 ASN  CA   -34.03493   3.24947 -34.93709 1S   149    1.00000
 2039  131 ASN  HA   -33.39118   3.91242 -35.49998 1S   149    0.00000
 2040  131 ASN  CB   -34.10150   3.68273 -33.45217 1S   149    1.00000
 2041  131 ASN  HB1  -33.16699   3.40506 -32.91683 1S   149    0.00000
 2042  131 ASN  HB2  -34.95794   3.17907 -32.95433 1S   149    0.00000
 2043  131 ASN  CG   -34.25046   5.20503 -33.35381 1S   149    1.00000
 2044  131 ASN  OD1  -33.92954   5.95153 -34.28394 1S   149    1.00000
 2045  131 ASN  ND2  -34.72551   5.67814 -32.16534 1S   149    1.00000
 2046  131 ASN  HD21 -34.96230   5.03066 -31.43127 1S   149    0.00000
 2047  131 ASN  HD22 -34.82042   6.65875 -32.02441 1S   149    0.00000
 2048  131 ASN  C    -33.38569   1.88750 -34.98982 1S   149    1.00000
 2049  131 ASN  O    -32.17317   1.79950 -35.16418 1S   149    1.00000
 2050  132 GLU  N    -34.17656   0.79277 -34.88184 1S   150    1.00000
 2051  132 GLU  HN   -35.15908   0.87708 -34.72307 1S   150    0.00000
 2052  132 GLU  CA   -33.67971  -0.56330 -34.98883 1S   150    1.00000
 2053  132 GLU  HA   -32.84439  -0.65715 -34.30835 1S   150    0.00000
 2054  132 GLU  CB   -34.75568  -1.59987 -34.57963 1S   150    1.00000
 2055  132 GLU  HB1  -35.64297  -1.51687 -35.24196 1S   150    0.00000
 2056  132 GLU  HB2  -35.09324  -1.31986 -33.55490 1S   150    0.00000
 2057  132 GLU  CG   -34.28090  -3.07018 -34.49406 1S   150    1.00000
 2058  132 GLU  HG1  -35.02068  -3.64737 -33.89804 1S   150    0.00000
 2059  132 GLU  HG2  -33.30212  -3.11692 -33.97149 1S   150    0.00000
 2060  132 GLU  CD   -34.16434  -3.74671 -35.86364 1S   150    1.00000
 2061  132 GLU  OE1  -33.22541  -4.56913 -36.03445 1S   150    1.00000
 2062  132 GLU  OE2  -35.01298  -3.45890 -36.74896 1S   150    1.00000
 2063  132 GLU  C    -33.17060  -0.82917 -36.38669 1S   150    1.00000
 2064  132 GLU  O    -32.09816  -1.39919 -36.55789 1S   150    1.00000
 2065  133 ILE  N    -33.89834  -0.36792 -37.43143 1S   151    1.00000
 2066  133 ILE  HN   -34.77033   0.09208 -37.28001 1S   151    0.00000
 2067  133 ILE  CA   -33.48721  -0.49390 -38.81874 1S   151    1.00000
 2068  133 ILE  HA   -33.32032  -1.54373 -39.01809 1S   151    0.00000
 2069  133 ILE  CB   -34.54862   0.03534 -39.78174 1S   151    1.00000
 2070  133 ILE  HB   -34.82147   1.07415 -39.48997 1S   151    0.00000
 2071  133 ILE  CG2  -34.01261   0.08245 -41.23545 1S   151    1.00000
 2072  133 ILE  HG21 -33.67274  -0.92497 -41.55298 1S   151    0.00000
 2073  133 ILE  HG22 -33.16940   0.79574 -41.33851 1S   151    0.00000
 2074  133 ILE  HG23 -34.80350   0.42239 -41.93393 1S   151    0.00000
 2075  133 ILE  CG1  -35.82272  -0.83412 -39.65982 1S   151    1.00000
 2076  133 ILE  HG11 -36.14606  -0.87266 -38.59729 1S   151    0.00000
 2077  133 ILE  HG12 -35.58134  -1.87453 -39.96916 1S   151    0.00000
 2078  133 ILE  CD   -36.99627  -0.31780 -40.49384 1S   151    1.00000
 2079  133 ILE  HD1  -36.78508  -0.41861 -41.57933 1S   151    0.00000
 2080  133 ILE  HD2  -37.19291   0.75113 -40.26539 1S   151    0.00000
 2081  133 ILE  HD3  -37.91106  -0.90445 -40.26638 1S   151    0.00000
 2082  133 ILE  C    -32.18576   0.23723 -39.04569 1S   151    1.00000
 2083  133 ILE  O    -31.23422  -0.31137 -39.59471 1S   151    1.00000
 2084  134 MET  N    -32.10286   1.50526 -38.60392 1S   152    1.00000
 2085  134 MET  HN   -32.86404   1.93761 -38.12167 1S   152    0.00000
 2086  134 MET  CA   -30.97435   2.34854 -38.89399 1S   152    1.00000
 2087  134 MET  HA   -30.72999   2.21791 -39.93863 1S   152    0.00000
 2088  134 MET  CB   -31.31651   3.83409 -38.66815 1S   152    1.00000
 2089  134 MET  HB1  -30.42090   4.44755 -38.89566 1S   152    0.00000
 2090  134 MET  HB2  -31.58569   3.99810 -37.60110 1S   152    0.00000
 2091  134 MET  CG   -32.47525   4.33372 -39.55692 1S   152    1.00000
 2092  134 MET  HG1  -32.63906   5.41121 -39.35003 1S   152    0.00000
 2093  134 MET  HG2  -33.40378   3.81816 -39.24905 1S   152    0.00000
 2094  134 MET  SD   -32.25778   4.06765 -41.34471 1S   152    1.00000
 2095  134 MET  CE   -30.87365   5.19875 -41.63460 1S   152    1.00000
 2096  134 MET  HE1  -29.98069   4.90770 -41.04294 1S   152    0.00000
 2097  134 MET  HE2  -31.14730   6.23991 -41.36269 1S   152    0.00000
 2098  134 MET  HE3  -30.58905   5.18720 -42.70713 1S   152    0.00000
 2099  134 MET  C    -29.73495   1.97369 -38.11494 1S   152    1.00000
 2100  134 MET  O    -28.63590   2.34318 -38.51535 1S   152    1.00000
 2101  135 ALA  N    -29.86150   1.20246 -37.01333 1S   153    1.00000
 2102  135 ALA  HN   -30.75723   0.91637 -36.67719 1S   153    0.00000
 2103  135 ALA  CA   -28.72794   0.77260 -36.22812 1S   153    1.00000
 2104  135 ALA  HA   -27.90004   1.44215 -36.39455 1S   153    0.00000
 2105  135 ALA  CB   -29.04440   0.79675 -34.72185 1S   153    1.00000
 2106  135 ALA  HB1  -29.89981   0.13008 -34.48375 1S   153    0.00000
 2107  135 ALA  HB2  -29.31205   1.83127 -34.41595 1S   153    0.00000
 2108  135 ALA  HB3  -28.16293   0.47893 -34.12470 1S   153    0.00000
 2109  135 ALA  C    -28.25036  -0.61040 -36.59910 1S   153    1.00000
 2110  135 ALA  O    -27.09139  -0.93313 -36.34445 1S   153    1.00000
 2111  136 ASN  N    -29.12113  -1.47056 -37.18180 1S   154    1.00000
 2112  136 ASN  HN   -30.04811  -1.18873 -37.42144 1S   154    0.00000
 2113  136 ASN  CA   -28.83752  -2.89082 -37.29161 1S   154    1.00000
 2114  136 ASN  HA   -27.84004  -3.09748 -36.92746 1S   154    0.00000
 2115  136 ASN  CB   -29.83857  -3.74818 -36.47807 1S   154    1.00000
 2116  136 ASN  HB1  -29.62700  -4.83060 -36.61470 1S   154    0.00000
 2117  136 ASN  HB2  -30.87651  -3.55401 -36.81849 1S   154    0.00000
 2118  136 ASN  CG   -29.73198  -3.40040 -34.98816 1S   154    1.00000
 2119  136 ASN  OD1  -30.48279  -2.57790 -34.45552 1S   154    1.00000
 2120  136 ASN  ND2  -28.75181  -4.05179 -34.29384 1S   154    1.00000
 2121  136 ASN  HD21 -28.64063  -3.86796 -33.32094 1S   154    0.00000
 2122  136 ASN  HD22 -28.16348  -4.71089 -34.76255 1S   154    0.00000
 2123  136 ASN  C    -28.87171  -3.39489 -38.71115 1S   154    1.00000
 2124  136 ASN  O    -28.19199  -4.37273 -39.01898 1S   154    1.00000
 2125  137 SER  N    -29.66436  -2.77549 -39.61803 1S   155    1.00000
 2126  137 SER  HN   -30.18765  -1.95555 -39.39022 1S   155    0.00000
 2127  137 SER  CA   -29.86454  -3.30213 -40.95495 1S   155    1.00000
 2128  137 SER  HA   -30.04240  -4.36563 -40.86654 1S   155    0.00000
 2129  137 SER  CB   -31.09145  -2.66909 -41.66718 1S   155    1.00000
 2130  137 SER  HB1  -30.94485  -1.57411 -41.77739 1S   155    0.00000
 2131  137 SER  HB2  -31.99809  -2.83531 -41.04610 1S   155    0.00000
 2132  137 SER  OG   -31.31953  -3.22792 -42.95664 1S   155    1.00000
 2133  137 SER  HG1  -32.26495  -3.42913 -43.01515 1S   155    0.00000
 2134  137 SER  C    -28.63271  -3.09018 -41.80198 1S   155    1.00000
 2135  137 SER  O    -27.96559  -2.06454 -41.69924 1S   155    1.00000
 2136  138 LEU  N    -28.31951  -4.08603 -42.66174 1S   156    1.00000
 2137  138 LEU  HN   -28.83024  -4.94173 -42.65691 1S   156    0.00000
 2138  138 LEU  CA   -27.28698  -3.98675 -43.66526 1S   156    1.00000
 2139  138 LEU  HA   -26.72533  -3.07363 -43.52949 1S   156    0.00000
 2140  138 LEU  CB   -26.32570  -5.19897 -43.64523 1S   156    1.00000
 2141  138 LEU  HB1  -25.60184  -5.10832 -44.48653 1S   156    0.00000
 2142  138 LEU  HB2  -26.90738  -6.13442 -43.79884 1S   156    0.00000
 2143  138 LEU  CG   -25.50173  -5.33807 -42.34463 1S   156    1.00000
 2144  138 LEU  HG   -26.20579  -5.54562 -41.50580 1S   156    0.00000
 2145  138 LEU  CD1  -24.53807  -6.53410 -42.44977 1S   156    1.00000
 2146  138 LEU  HD11 -23.82018  -6.37582 -43.28269 1S   156    0.00000
 2147  138 LEU  HD12 -25.10350  -7.47022 -42.64225 1S   156    0.00000
 2148  138 LEU  HD13 -23.96480  -6.65261 -41.50632 1S   156    0.00000
 2149  138 LEU  CD2  -24.73293  -4.04842 -41.99953 1S   156    1.00000
 2150  138 LEU  HD21 -25.43148  -3.23786 -41.70444 1S   156    0.00000
 2151  138 LEU  HD22 -24.14986  -3.70844 -42.88021 1S   156    0.00000
 2152  138 LEU  HD23 -24.03478  -4.22707 -41.15514 1S   156    0.00000
 2153  138 LEU  C    -27.90964  -3.92029 -45.03807 1S   156    1.00000
 2154  138 LEU  O    -27.20238  -3.81088 -46.03638 1S   156    1.00000
 2155  139 ASP  N    -29.25376  -3.97328 -45.14991 1S   157    1.00000
 2156  139 ASP  HN   -29.85273  -4.01570 -44.35162 1S   157    0.00000
 2157  139 ASP  CA   -29.91307  -3.94482 -46.43417 1S   157    1.00000
 2158  139 ASP  HA   -29.29839  -4.46351 -47.15904 1S   157    0.00000
 2159  139 ASP  CB   -31.29876  -4.63896 -46.37838 1S   157    1.00000
 2160  139 ASP  HB1  -31.94223  -4.14361 -45.62202 1S   157    0.00000
 2161  139 ASP  HB2  -31.16150  -5.69725 -46.06830 1S   157    0.00000
 2162  139 ASP  CG   -31.99378  -4.61679 -47.74084 1S   157    1.00000
 2163  139 ASP  OD1  -31.65327  -5.47165 -48.59802 1S   157    1.00000
 2164  139 ASP  OD2  -32.85111  -3.72074 -47.94931 1S   157    1.00000
 2165  139 ASP  C    -30.05520  -2.49996 -46.84910 1S   157    1.00000
 2166  139 ASP  O    -30.69124  -1.71106 -46.15702 1S   157    1.00000
 2167  140 TYR  N    -29.46370  -2.13567 -48.01310 1S   158    1.00000
 2168  140 TYR  HN   -28.97685  -2.81423 -48.55726 1S   158    0.00000
 2169  140 TYR  CA   -29.40891  -0.78585 -48.53826 1S   158    1.00000
 2170  140 TYR  HA   -28.84718  -0.19445 -47.82790 1S   158    0.00000
 2171  140 TYR  CB   -28.66980  -0.76967 -49.91050 1S   158    1.00000
 2172  140 TYR  HB1  -29.21612  -1.39777 -50.64688 1S   158    0.00000
 2173  140 TYR  HB2  -27.65502  -1.20494 -49.78091 1S   158    0.00000
 2174  140 TYR  CG   -28.50646   0.61520 -50.49891 1S   158    1.00000
 2175  140 TYR  CD1  -29.51830   1.15856 -51.30980 1S   158    1.00000
 2176  140 TYR  HD1  -30.41008   0.58404 -51.49641 1S   158    0.00000
 2177  140 TYR  CE1  -29.38497   2.42932 -51.87909 1S   158    1.00000
 2178  140 TYR  HE1  -30.17931   2.82533 -52.49484 1S   158    0.00000
 2179  140 TYR  CZ   -28.21833   3.16928 -51.65658 1S   158    1.00000
 2180  140 TYR  OH   -28.05879   4.44346 -52.24055 1S   158    1.00000
 2181  140 TYR  HH   -28.78202   4.57864 -52.85730 1S   158    0.00000
 2182  140 TYR  CD2  -27.34647   1.37293 -50.27140 1S   158    1.00000
 2183  140 TYR  HD2  -26.55260   0.96848 -49.66088 1S   158    0.00000
 2184  140 TYR  CE2  -27.20274   2.64210 -50.84931 1S   158    1.00000
 2185  140 TYR  HE2  -26.30641   3.21777 -50.67627 1S   158    0.00000
 2186  140 TYR  C    -30.78854  -0.16879 -48.67256 1S   158    1.00000
 2187  140 TYR  O    -30.99322   0.97616 -48.27610 1S   158    1.00000
 2188  141 ASN  N    -31.76150  -0.92107 -49.23533 1S   159    1.00000
 2189  141 ASN  HN   -31.59703  -1.87362 -49.48167 1S   159    0.00000
 2190  141 ASN  CA   -33.07127  -0.40462 -49.56967 1S   159    1.00000
 2191  141 ASN  HA   -32.94451   0.59232 -49.97067 1S   159    0.00000
 2192  141 ASN  CB   -33.80317  -1.29589 -50.60136 1S   159    1.00000
 2193  141 ASN  HB1  -34.87896  -1.02118 -50.66319 1S   159    0.00000
 2194  141 ASN  HB2  -33.72338  -2.36108 -50.29647 1S   159    0.00000
 2195  141 ASN  CG   -33.19772  -1.09027 -51.99489 1S   159    1.00000
 2196  141 ASN  OD1  -32.64228  -0.03352 -52.31037 1S   159    1.00000
 2197  141 ASN  ND2  -33.34589  -2.12856 -52.86914 1S   159    1.00000
 2198  141 ASN  HD21 -33.82174  -2.95946 -52.57960 1S   159    0.00000
 2199  141 ASN  HD22 -32.99582  -2.03885 -53.79788 1S   159    0.00000
 2200  141 ASN  C    -33.95883  -0.25657 -48.36056 1S   159    1.00000
 2201  141 ASN  O    -34.78011   0.65524 -48.32085 1S   159    1.00000
 2202  142 GLU  N    -33.81090  -1.12420 -47.33437 1S   160    1.00000
 2203  142 GLU  HN   -33.18755  -1.90450 -47.40787 1S   160    0.00000
 2204  142 GLU  CA   -34.55266  -1.03886 -46.09396 1S   160    1.00000
 2205  142 GLU  HA   -35.60529  -0.98180 -46.33494 1S   160    0.00000
 2206  142 GLU  CB   -34.29475  -2.26308 -45.18940 1S   160    1.00000
 2207  142 GLU  HB1  -33.23213  -2.25379 -44.85938 1S   160    0.00000
 2208  142 GLU  HB2  -34.44269  -3.18551 -45.79484 1S   160    0.00000
 2209  142 GLU  CG   -35.23017  -2.33688 -43.96554 1S   160    1.00000
 2210  142 GLU  HG1  -36.27185  -2.52329 -44.30255 1S   160    0.00000
 2211  142 GLU  HG2  -35.21125  -1.37721 -43.40924 1S   160    0.00000
 2212  142 GLU  CD   -34.81190  -3.45026 -43.00592 1S   160    1.00000
 2213  142 GLU  OE1  -35.45248  -3.55521 -41.92750 1S   160    1.00000
 2214  142 GLU  OE2  -33.85096  -4.19919 -43.32177 1S   160    1.00000
 2215  142 GLU  C    -34.15278   0.20226 -45.33457 1S   160    1.00000
 2216  142 GLU  O    -35.00108   0.95575 -44.85965 1S   160    1.00000
 2217  143 ARG  N    -32.82576   0.45799 -45.25068 1S   161    1.00000
 2218  143 ARG  HN   -32.16263  -0.18580 -45.62969 1S   161    0.00000
 2219  143 ARG  CA   -32.26171   1.63744 -44.63695 1S   161    1.00000
 2220  143 ARG  HA   -32.62442   1.69221 -43.62000 1S   161    0.00000
 2221  143 ARG  CB   -30.72216   1.60844 -44.63154 1S   161    1.00000
 2222  143 ARG  HB1  -30.34367   2.57484 -44.22796 1S   161    0.00000
 2223  143 ARG  HB2  -30.34865   1.49965 -45.67425 1S   161    0.00000
 2224  143 ARG  CG   -30.12801   0.47129 -43.78861 1S   161    1.00000
 2225  143 ARG  HG1  -30.47870  -0.50437 -44.17991 1S   161    0.00000
 2226  143 ARG  HG2  -30.50004   0.55008 -42.74404 1S   161    0.00000
 2227  143 ARG  CD   -28.59555   0.47399 -43.80999 1S   161    1.00000
 2228  143 ARG  HD1  -28.22532   0.51104 -44.85724 1S   161    0.00000
 2229  143 ARG  HD2  -28.16693  -0.41931 -43.32432 1S   161    0.00000
 2230  143 ARG  NE   -28.11980   1.70727 -43.10931 1S   161    1.00000
 2231  143 ARG  HE   -28.06119   2.55329 -43.63824 1S   161    0.00000
 2232  143 ARG  CZ   -28.01485   1.81952 -41.75608 1S   161    1.00000
 2233  143 ARG  NH1  -28.18453   0.75369 -40.93166 1S   161    1.00000
 2234  143 ARG  HH11 -28.35245  -0.15565 -41.31873 1S   161    0.00000
 2235  143 ARG  HH12 -28.14858   0.88659 -39.94521 1S   161    0.00000
 2236  143 ARG  NH2  -27.75040   3.04069 -41.21967 1S   161    1.00000
 2237  143 ARG  HH21 -27.68472   3.83394 -41.82002 1S   161    0.00000
 2238  143 ARG  HH22 -27.74193   3.13743 -40.22143 1S   161    0.00000
 2239  143 ARG  C    -32.67825   2.89363 -45.35913 1S   161    1.00000
 2240  143 ARG  O    -32.97724   3.90107 -44.72310 1S   161    1.00000
 2241  144 LEU  N    -32.73126   2.85125 -46.71351 1S   162    1.00000
 2242  144 LEU  HN   -32.46333   2.02809 -47.21199 1S   162    0.00000
 2243  144 LEU  CA   -33.14025   3.96916 -47.53329 1S   162    1.00000
 2244  144 LEU  HA   -32.54058   4.81497 -47.22848 1S   162    0.00000
 2245  144 LEU  CB   -32.94289   3.71282 -49.04806 1S   162    1.00000
 2246  144 LEU  HB1  -33.50724   2.80483 -49.35064 1S   162    0.00000
 2247  144 LEU  HB2  -31.86450   3.50739 -49.22618 1S   162    0.00000
 2248  144 LEU  CG   -33.37080   4.89239 -49.95696 1S   162    1.00000
 2249  144 LEU  HG   -34.47604   5.01675 -49.87271 1S   162    0.00000
 2250  144 LEU  CD1  -32.72221   6.21437 -49.51776 1S   162    1.00000
 2251  144 LEU  HD11 -31.62257   6.08475 -49.43410 1S   162    0.00000
 2252  144 LEU  HD12 -33.11306   6.55533 -48.53700 1S   162    0.00000
 2253  144 LEU  HD13 -32.93418   7.00915 -50.26021 1S   162    0.00000
 2254  144 LEU  CD2  -33.07052   4.61296 -51.43950 1S   162    1.00000
 2255  144 LEU  HD21 -33.58817   3.68932 -51.77346 1S   162    0.00000
 2256  144 LEU  HD22 -31.97822   4.49032 -51.59530 1S   162    0.00000
 2257  144 LEU  HD23 -33.42382   5.46194 -52.06382 1S   162    0.00000
 2258  144 LEU  C    -34.58610   4.30587 -47.29421 1S   162    1.00000
 2259  144 LEU  O    -34.93355   5.47356 -47.13719 1S   162    1.00000
 2260  145 TRP  N    -35.45951   3.27617 -47.22436 1S   163    1.00000
 2261  145 TRP  HN   -35.15125   2.33522 -47.36126 1S   163    0.00000
 2262  145 TRP  CA   -36.86954   3.42895 -46.96201 1S   163    1.00000
 2263  145 TRP  HA   -37.27064   4.08035 -47.72650 1S   163    0.00000
 2264  145 TRP  CB   -37.62032   2.07030 -47.02327 1S   163    1.00000
 2265  145 TRP  HB1  -37.07525   1.32593 -46.40547 1S   163    0.00000
 2266  145 TRP  HB2  -37.59320   1.71371 -48.07665 1S   163    0.00000
 2267  145 TRP  CG   -39.07230   2.11400 -46.57488 1S   163    1.00000
 2268  145 TRP  CD1  -40.15898   2.63264 -47.22028 1S   163    1.00000
 2269  145 TRP  HD1  -40.14252   3.04903 -48.21702 1S   163    0.00000
 2270  145 TRP  NE1  -41.26835   2.57072 -46.40959 1S   163    1.00000
 2271  145 TRP  HE1  -42.16601   2.87737 -46.64282 1S   163    0.00000
 2272  145 TRP  CE2  -40.90496   2.01026 -45.20615 1S   163    1.00000
 2273  145 TRP  CD2  -39.52726   1.71386 -45.26588 1S   163    1.00000
 2274  145 TRP  CE3  -38.86095   1.15272 -44.17942 1S   163    1.00000
 2275  145 TRP  HE3  -37.80509   0.93251 -44.19898 1S   163    0.00000
 2276  145 TRP  CZ3  -39.61130   0.86800 -43.02781 1S   163    1.00000
 2277  145 TRP  HZ3  -39.12692   0.42307 -42.17333 1S   163    0.00000
 2278  145 TRP  CZ2  -41.64149   1.73955 -44.05748 1S   163    1.00000
 2279  145 TRP  HZ2  -42.69118   1.97613 -43.98653 1S   163    0.00000
 2280  145 TRP  CH2  -40.98337   1.15097 -42.97121 1S   163    1.00000
 2281  145 TRP  HH2  -41.54165   0.91692 -42.07597 1S   163    0.00000
 2282  145 TRP  C    -37.09255   4.10193 -45.62846 1S   163    1.00000
 2283  145 TRP  O    -37.83730   5.07197 -45.56568 1S   163    1.00000
 2284  146 ALA  N    -36.43077   3.62779 -44.54840 1S   164    1.00000
 2285  146 ALA  HN   -35.81644   2.84399 -44.62952 1S   164    0.00000
 2286  146 ALA  CA   -36.57731   4.16739 -43.21375 1S   164    1.00000
 2287  146 ALA  HA   -37.62604   4.11967 -42.95393 1S   164    0.00000
 2288  146 ALA  CB   -35.77037   3.34744 -42.19346 1S   164    1.00000
 2289  146 ALA  HB1  -34.70022   3.31322 -42.48379 1S   164    0.00000
 2290  146 ALA  HB2  -36.15009   2.30424 -42.16522 1S   164    0.00000
 2291  146 ALA  HB3  -35.85543   3.77704 -41.17221 1S   164    0.00000
 2292  146 ALA  C    -36.13745   5.61106 -43.12986 1S   164    1.00000
 2293  146 ALA  O    -36.84661   6.44538 -42.57091 1S   164    1.00000
 2294  147 TRP  N    -34.96657   5.93544 -43.72804 1S   165    1.00000
 2295  147 TRP  HN   -34.41568   5.22699 -44.16752 1S   165    0.00000
 2296  147 TRP  CA   -34.39656   7.26396 -43.77939 1S   165    1.00000
 2297  147 TRP  HA   -34.24831   7.58841 -42.76127 1S   165    0.00000
 2298  147 TRP  CB   -33.03155   7.24190 -44.51826 1S   165    1.00000
 2299  147 TRP  HB1  -33.18366   6.97908 -45.58726 1S   165    0.00000
 2300  147 TRP  HB2  -32.42432   6.42891 -44.06250 1S   165    0.00000
 2301  147 TRP  CG   -32.20140   8.51081 -44.42678 1S   165    1.00000
 2302  147 TRP  CD1  -31.26081   8.83385 -43.48924 1S   165    1.00000
 2303  147 TRP  HD1  -30.97896   8.20610 -42.65712 1S   165    0.00000
 2304  147 TRP  NE1  -30.73985  10.07866 -43.74387 1S   165    1.00000
 2305  147 TRP  HE1  -30.07104  10.53945 -43.20011 1S   165    0.00000
 2306  147 TRP  CE2  -31.35916  10.59517 -44.85816 1S   165    1.00000
 2307  147 TRP  CD2  -32.27441   9.63274 -45.33155 1S   165    1.00000
 2308  147 TRP  CE3  -33.03979   9.87045 -46.47024 1S   165    1.00000
 2309  147 TRP  HE3  -33.71236   9.13572 -46.87746 1S   165    0.00000
 2310  147 TRP  CZ3  -32.91255  11.11530 -47.10545 1S   165    1.00000
 2311  147 TRP  HZ3  -33.50037  11.32389 -47.98714 1S   165    0.00000
 2312  147 TRP  CZ2  -31.21834  11.81724 -45.50146 1S   165    1.00000
 2313  147 TRP  HZ2  -30.53261  12.55840 -45.13223 1S   165    0.00000
 2314  147 TRP  CH2  -32.01704  12.08041 -46.62171 1S   165    1.00000
 2315  147 TRP  HH2  -31.92871  13.03011 -47.12984 1S   165    0.00000
 2316  147 TRP  C    -35.31834   8.24545 -44.46624 1S   165    1.00000
 2317  147 TRP  O    -35.62849   9.30533 -43.92234 1S   165    1.00000
 2318  148 GLU  N    -35.77669   7.89096 -45.68785 1S   166    1.00000
 2319  148 GLU  HN   -35.53287   7.00727 -46.08661 1S   166    0.00000
 2320  148 GLU  CA   -36.55752   8.75073 -46.54315 1S   166    1.00000
 2321  148 GLU  HA   -36.07373   9.71723 -46.56382 1S   166    0.00000
 2322  148 GLU  CB   -36.64754   8.19696 -47.99137 1S   166    1.00000
 2323  148 GLU  HB1  -36.86928   7.10807 -47.93943 1S   166    0.00000
 2324  148 GLU  HB2  -35.64743   8.30630 -48.46667 1S   166    0.00000
 2325  148 GLU  CG   -37.71409   8.84056 -48.91229 1S   166    1.00000
 2326  148 GLU  HG1  -38.72797   8.64844 -48.50077 1S   166    0.00000
 2327  148 GLU  HG2  -37.66511   8.36924 -49.91666 1S   166    0.00000
 2328  148 GLU  CD   -37.53084  10.34856 -49.07806 1S   166    1.00000
 2329  148 GLU  OE1  -36.42834  10.86356 -48.76235 1S   166    1.00000
 2330  148 GLU  OE2  -38.50206  11.00865 -49.53353 1S   166    1.00000
 2331  148 GLU  C    -37.93636   8.95362 -45.99716 1S   166    1.00000
 2332  148 GLU  O    -38.41281  10.08417 -45.94043 1S   166    1.00000
 2333  149 SER  N    -38.61656   7.86636 -45.57204 1S   167    1.00000
 2334  149 SER  HN   -38.20699   6.95503 -45.58038 1S   167    0.00000
 2335  149 SER  CA   -39.99406   7.94650 -45.14752 1S   167    1.00000
 2336  149 SER  HA   -40.50596   8.55795 -45.87536 1S   167    0.00000
 2337  149 SER  CB   -40.74969   6.59457 -45.13854 1S   167    1.00000
 2338  149 SER  HB1  -40.76255   6.17876 -46.16947 1S   167    0.00000
 2339  149 SER  HB2  -41.80300   6.75360 -44.82037 1S   167    0.00000
 2340  149 SER  OG   -40.15203   5.63990 -44.27101 1S   167    1.00000
 2341  149 SER  HG1  -39.37026   5.31618 -44.73478 1S   167    0.00000
 2342  149 SER  C    -40.12903   8.65554 -43.82639 1S   167    1.00000
 2343  149 SER  O    -41.13802   9.30369 -43.59481 1S   167    1.00000
 2344  150 TRP  N    -39.10745   8.62308 -42.93886 1S   168    1.00000
 2345  150 TRP  HN   -38.29378   8.06535 -43.09391 1S   168    0.00000
 2346  150 TRP  CA   -39.11768   9.42536 -41.73015 1S   168    1.00000
 2347  150 TRP  HA   -40.02209   9.18753 -41.18726 1S   168    0.00000
 2348  150 TRP  CB   -37.89197   9.12219 -40.83233 1S   168    1.00000
 2349  150 TRP  HB1  -36.96107   9.28714 -41.41901 1S   168    0.00000
 2350  150 TRP  HB2  -37.92387   8.04640 -40.56411 1S   168    0.00000
 2351  150 TRP  CG   -37.79795   9.91787 -39.53669 1S   168    1.00000
 2352  150 TRP  CD1  -36.83334  10.81614 -39.18404 1S   168    1.00000
 2353  150 TRP  HD1  -35.98136  11.07626 -39.79403 1S   168    0.00000
 2354  150 TRP  NE1  -37.12745  11.36721 -37.96382 1S   168    1.00000
 2355  150 TRP  HE1  -36.59406  12.05689 -37.50389 1S   168    0.00000
 2356  150 TRP  CE2  -38.30669  10.85359 -37.50528 1S   168    1.00000
 2357  150 TRP  CD2  -38.76109   9.91099 -38.46288 1S   168    1.00000
 2358  150 TRP  CE3  -39.93559   9.20089 -38.26129 1S   168    1.00000
 2359  150 TRP  HE3  -40.30646   8.48148 -38.97518 1S   168    0.00000
 2360  150 TRP  CZ3  -40.64753   9.42843 -37.07531 1S   168    1.00000
 2361  150 TRP  HZ3  -41.55356   8.87620 -36.88787 1S   168    0.00000
 2362  150 TRP  CZ2  -39.03908  11.10605 -36.35433 1S   168    1.00000
 2363  150 TRP  HZ2  -38.71192  11.83114 -35.62408 1S   168    0.00000
 2364  150 TRP  CH2  -40.21791  10.38704 -36.14672 1S   168    1.00000
 2365  150 TRP  HH2  -40.79695  10.55253 -35.25217 1S   168    0.00000
 2366  150 TRP  C    -39.14132  10.90620 -42.05964 1S   168    1.00000
 2367  150 TRP  O    -39.91270  11.66981 -41.48337 1S   168    1.00000
 2368  151 ARG  N    -38.30358  11.33361 -43.02478 1S   169    1.00000
 2369  151 ARG  HN   -37.70719  10.69452 -43.50656 1S   169    0.00000
 2370  151 ARG  CA   -38.17111  12.71849 -43.40723 1S   169    1.00000
 2371  151 ARG  HA   -38.13785  13.31674 -42.50665 1S   169    0.00000
 2372  151 ARG  CB   -36.85454  12.93349 -44.17400 1S   169    1.00000
 2373  151 ARG  HB1  -36.85448  13.90911 -44.70611 1S   169    0.00000
 2374  151 ARG  HB2  -36.73596  12.12703 -44.93092 1S   169    0.00000
 2375  151 ARG  CG   -35.66399  12.92355 -43.20725 1S   169    1.00000
 2376  151 ARG  HG1  -35.82873  12.13331 -42.44115 1S   169    0.00000
 2377  151 ARG  HG2  -35.63591  13.90241 -42.67633 1S   169    0.00000
 2378  151 ARG  CD   -34.32448  12.66849 -43.89646 1S   169    1.00000
 2379  151 ARG  HD1  -34.12224  13.44010 -44.66935 1S   169    0.00000
 2380  151 ARG  HD2  -34.29417  11.66318 -44.36858 1S   169    0.00000
 2381  151 ARG  NE   -33.25101  12.76797 -42.86227 1S   169    1.00000
 2382  151 ARG  HE   -32.70884  13.60598 -42.80445 1S   169    0.00000
 2383  151 ARG  CZ   -32.97994  11.78083 -41.96456 1S   169    1.00000
 2384  151 ARG  NH1  -32.00913  11.99701 -41.04320 1S   169    1.00000
 2385  151 ARG  HH11 -31.50871  12.86194 -41.05450 1S   169    0.00000
 2386  151 ARG  HH12 -31.74658  11.25312 -40.42316 1S   169    0.00000
 2387  151 ARG  NH2  -33.62849  10.58721 -41.98073 1S   169    1.00000
 2388  151 ARG  HH21 -34.31393  10.40371 -42.68649 1S   169    0.00000
 2389  151 ARG  HH22 -33.36381   9.87722 -41.33409 1S   169    0.00000
 2390  151 ARG  C    -39.33417  13.21425 -44.23120 1S   169    1.00000
 2391  151 ARG  O    -39.64531  14.40209 -44.19773 1S   169    1.00000
 2392  152 SER  N    -40.02269  12.32956 -44.98396 1S   170    1.00000
 2393  152 SER  HN   -39.76105  11.36676 -45.03613 1S   170    0.00000
 2394  152 SER  CA   -41.14097  12.73182 -45.80614 1S   170    1.00000
 2395  152 SER  HA   -40.99624  13.76540 -46.09036 1S   170    0.00000
 2396  152 SER  CB   -41.22247  11.94128 -47.13867 1S   170    1.00000
 2397  152 SER  HB1  -40.22069  11.95719 -47.62085 1S   170    0.00000
 2398  152 SER  HB2  -41.94470  12.43282 -47.82434 1S   170    0.00000
 2399  152 SER  OG   -41.60675  10.58269 -46.96425 1S   170    1.00000
 2400  152 SER  HG1  -41.51721  10.16817 -47.82633 1S   170    0.00000
 2401  152 SER  C    -42.44252  12.66022 -45.03470 1S   170    1.00000
 2402  152 SER  O    -43.35212  13.44586 -45.25815 1S   170    1.00000
 2403  153 GLU  N    -42.60441  11.72326 -44.08363 1S   171    1.00000
 2404  153 GLU  HN   -41.89587  11.05613 -43.85748 1S   171    0.00000
 2405  153 GLU  CA   -43.87157  11.59126 -43.39668 1S   171    1.00000
 2406  153 GLU  HA   -44.67052  11.82413 -44.08813 1S   171    0.00000
 2407  153 GLU  CB   -44.12112  10.15577 -42.88422 1S   171    1.00000
 2408  153 GLU  HB1  -43.93261  10.05845 -41.79416 1S   171    0.00000
 2409  153 GLU  HB2  -43.39884   9.48960 -43.39884 1S   171    0.00000
 2410  153 GLU  CG   -45.49617   9.56406 -43.25325 1S   171    1.00000
 2411  153 GLU  HG1  -45.51506   8.49158 -42.96227 1S   171    0.00000
 2412  153 GLU  HG2  -45.64067   9.62822 -44.35331 1S   171    0.00000
 2413  153 GLU  CD   -46.64039  10.27794 -42.54192 1S   171    1.00000
 2414  153 GLU  OE1  -47.63298  10.62534 -43.23606 1S   171    1.00000
 2415  153 GLU  OE2  -46.54755  10.47218 -41.30079 1S   171    1.00000
 2416  153 GLU  C    -43.93277  12.57562 -42.26088 1S   171    1.00000
 2417  153 GLU  O    -44.94007  13.25045 -42.08110 1S   171    1.00000
 2418  154 VAL  N    -42.84087  12.67915 -41.47193 1S   172    1.00000
 2419  154 VAL  HN   -42.01456  12.15446 -41.66613 1S   172    0.00000
 2420  154 VAL  CA   -42.81751  13.43283 -40.24011 1S   172    1.00000
 2421  154 VAL  HA   -43.83425  13.63553 -39.93054 1S   172    0.00000
 2422  154 VAL  CB   -42.14801  12.64119 -39.12665 1S   172    1.00000
 2423  154 VAL  HB   -41.06031  12.51676 -39.32375 1S   172    0.00000
 2424  154 VAL  CG1  -42.33207  13.34828 -37.77318 1S   172    1.00000
 2425  154 VAL  HG11 -43.41605  13.43168 -37.55008 1S   172    0.00000
 2426  154 VAL  HG12 -41.88156  14.36191 -37.77594 1S   172    0.00000
 2427  154 VAL  HG13 -41.85946  12.75722 -36.96060 1S   172    0.00000
 2428  154 VAL  CG2  -42.81229  11.24835 -39.09176 1S   172    1.00000
 2429  154 VAL  HG21 -42.48615  10.62472 -39.95002 1S   172    0.00000
 2430  154 VAL  HG22 -43.91868  11.34518 -39.11442 1S   172    0.00000
 2431  154 VAL  HG23 -42.54088  10.72197 -38.15787 1S   172    0.00000
 2432  154 VAL  C    -42.14220  14.76155 -40.47084 1S   172    1.00000
 2433  154 VAL  O    -42.61048  15.78460 -39.97841 1S   172    1.00000
 2434  155 GLY  N    -41.03594  14.79513 -41.25316 1S   173    1.00000
 2435  155 GLY  HN   -40.66765  13.95964 -41.65568 1S   173    0.00000
 2436  155 GLY  CA   -40.28535  16.01015 -41.51810 1S   173    1.00000
 2437  155 GLY  HA1  -39.42178  15.73094 -42.10172 1S   173    0.00000
 2438  155 GLY  HA2  -40.01488  16.44539 -40.56625 1S   173    0.00000
 2439  155 GLY  C    -41.06351  17.04045 -42.29942 1S   173    1.00000
 2440  155 GLY  O    -40.94301  18.23350 -42.03173 1S   173    1.00000
 2441  156 LYS  N    -41.90717  16.60950 -43.27156 1S   174    1.00000
 2442  156 LYS  HN   -41.97107  15.64092 -43.50031 1S   174    0.00000
 2443  156 LYS  CA   -42.76708  17.49824 -44.03597 1S   174    1.00000
 2444  156 LYS  HA   -42.14796  18.28462 -44.44217 1S   174    0.00000
 2445  156 LYS  CB   -43.48941  16.78446 -45.20310 1S   174    1.00000
 2446  156 LYS  HB1  -44.42727  17.31732 -45.47977 1S   174    0.00000
 2447  156 LYS  HB2  -43.77753  15.76898 -44.86203 1S   174    0.00000
 2448  156 LYS  CG   -42.63833  16.69668 -46.48256 1S   174    1.00000
 2449  156 LYS  HG1  -41.60187  16.39869 -46.21094 1S   174    0.00000
 2450  156 LYS  HG2  -42.59644  17.70425 -46.94992 1S   174    0.00000
 2451  156 LYS  CD   -43.19800  15.69792 -47.50538 1S   174    1.00000
 2452  156 LYS  HD1  -44.23674  15.97120 -47.78809 1S   174    0.00000
 2453  156 LYS  HD2  -43.26010  14.70979 -47.02513 1S   174    0.00000
 2454  156 LYS  CE   -42.31502  15.46960 -48.73137 1S   174    1.00000
 2455  156 LYS  HE1  -42.45567  14.43481 -49.11391 1S   174    0.00000
 2456  156 LYS  HE2  -41.24351  15.62797 -48.48964 1S   174    0.00000
 2457  156 LYS  NZ   -42.70432  16.38550 -49.80969 1S   174    1.00000
 2458  156 LYS  HZ1  -42.34101  17.34116 -49.59004 1S   174    0.00000
 2459  156 LYS  HZ2  -43.74038  16.42521 -49.88108 1S   174    0.00000
 2460  156 LYS  HZ3  -42.29671  16.07483 -50.71342 1S   174    0.00000
 2461  156 LYS  C    -43.81271  18.15896 -43.16874 1S   174    1.00000
 2462  156 LYS  O    -44.12592  19.32992 -43.37354 1S   174    1.00000
 2463  157 GLN  N    -44.35456  17.44159 -42.15344 1S   175    1.00000
 2464  157 GLN  HN   -44.10597  16.48778 -42.00129 1S   175    0.00000
 2465  157 GLN  CA   -45.30698  18.00291 -41.21446 1S   175    1.00000
 2466  157 GLN  HA   -46.11886  18.43713 -41.78131 1S   175    0.00000
 2467  157 GLN  CB   -45.87848  16.95951 -40.22852 1S   175    1.00000
 2468  157 GLN  HB1  -46.56374  17.48362 -39.52315 1S   175    0.00000
 2469  157 GLN  HB2  -45.04888  16.51334 -39.63622 1S   175    0.00000
 2470  157 GLN  CG   -46.67539  15.83377 -40.90263 1S   175    1.00000
 2471  157 GLN  HG1  -46.01843  15.28263 -41.60108 1S   175    0.00000
 2472  157 GLN  HG2  -47.52151  16.26039 -41.48047 1S   175    0.00000
 2473  157 GLN  CD   -47.23412  14.90295 -39.81895 1S   175    1.00000
 2474  157 GLN  OE1  -47.86069  15.36594 -38.85940 1S   175    1.00000
 2475  157 GLN  NE2  -47.00616  13.56561 -39.97430 1S   175    1.00000
 2476  157 GLN  HE21 -46.48637  13.23241 -40.76520 1S   175    0.00000
 2477  157 GLN  HE22 -47.37137  12.92080 -39.30787 1S   175    0.00000
 2478  157 GLN  C    -44.68666  19.08533 -40.36202 1S   175    1.00000
 2479  157 GLN  O    -45.35044  20.05255 -39.99392 1S   175    1.00000
 2480  158 LEU  N    -43.38369  18.94294 -40.03389 1S   176    1.00000
 2481  158 LEU  HN   -42.85127  18.16620 -40.36495 1S   176    0.00000
 2482  158 LEU  CA   -42.68698  19.84782 -39.15306 1S   176    1.00000
 2483  158 LEU  HA   -43.35962  20.13570 -38.35842 1S   176    0.00000
 2484  158 LEU  CB   -41.42450  19.19696 -38.54891 1S   176    1.00000
 2485  158 LEU  HB1  -40.84658  19.94798 -37.96497 1S   176    0.00000
 2486  158 LEU  HB2  -40.77376  18.83173 -39.37368 1S   176    0.00000
 2487  158 LEU  CG   -41.75949  18.01965 -37.60874 1S   176    1.00000
 2488  158 LEU  HG   -42.48128  17.35233 -38.13033 1S   176    0.00000
 2489  158 LEU  CD1  -40.51808  17.17211 -37.28965 1S   176    1.00000
 2490  158 LEU  HD11 -39.76950  17.78493 -36.74869 1S   176    0.00000
 2491  158 LEU  HD12 -40.05904  16.78656 -38.22418 1S   176    0.00000
 2492  158 LEU  HD13 -40.79696  16.30938 -36.64834 1S   176    0.00000
 2493  158 LEU  CD2  -42.43619  18.50434 -36.31729 1S   176    1.00000
 2494  158 LEU  HD21 -43.39990  19.00933 -36.53623 1S   176    0.00000
 2495  158 LEU  HD22 -41.77405  19.21659 -35.78210 1S   176    0.00000
 2496  158 LEU  HD23 -42.63925  17.64314 -35.64793 1S   176    0.00000
 2497  158 LEU  C    -42.27174  21.10544 -39.85388 1S   176    1.00000
 2498  158 LEU  O    -41.97488  22.09397 -39.19048 1S   176    1.00000
 2499  159 ARG  N    -42.25820  21.10920 -41.20661 1S   177    1.00000
 2500  159 ARG  HN   -42.52267  20.29658 -41.72170 1S   177    0.00000
 2501  159 ARG  CA   -41.84388  22.23989 -42.00213 1S   177    1.00000
 2502  159 ARG  HA   -40.83008  22.42948 -41.68377 1S   177    0.00000
 2503  159 ARG  CB   -41.80021  21.92920 -43.52058 1S   177    1.00000
 2504  159 ARG  HB1  -42.81136  21.64364 -43.87813 1S   177    0.00000
 2505  159 ARG  HB2  -41.14228  21.04692 -43.68203 1S   177    0.00000
 2506  159 ARG  CG   -41.27758  23.09038 -44.38335 1S   177    1.00000
 2507  159 ARG  HG1  -41.97469  23.95230 -44.28223 1S   177    0.00000
 2508  159 ARG  HG2  -41.29075  22.77768 -45.45157 1S   177    0.00000
 2509  159 ARG  CD   -39.85731  23.52921 -44.00855 1S   177    1.00000
 2510  159 ARG  HD1  -39.12164  22.74094 -44.25451 1S   177    0.00000
 2511  159 ARG  HD2  -39.76976  23.76715 -42.92899 1S   177    0.00000
 2512  159 ARG  NE   -39.56666  24.79352 -44.73798 1S   177    1.00000
 2513  159 ARG  HE   -40.14500  25.59194 -44.55475 1S   177    0.00000
 2514  159 ARG  CZ   -38.58911  24.94473 -45.67180 1S   177    1.00000
 2515  159 ARG  NH1  -38.43476  26.17348 -46.22744 1S   177    1.00000
 2516  159 ARG  HH11 -37.69780  26.34331 -46.88572 1S   177    0.00000
 2517  159 ARG  HH12 -39.04899  26.91009 -45.95044 1S   177    0.00000
 2518  159 ARG  NH2  -37.77917  23.92496 -46.05312 1S   177    1.00000
 2519  159 ARG  HH21 -37.93987  23.00268 -45.69911 1S   177    0.00000
 2520  159 ARG  HH22 -37.11066  24.08163 -46.78263 1S   177    0.00000
 2521  159 ARG  C    -42.60706  23.52220 -41.71956 1S   177    1.00000
 2522  159 ARG  O    -41.92859  24.46603 -41.31901 1S   177    1.00000
 2523  160 PRO  N    -43.93057  23.67922 -41.84783 1S   178    1.00000
 2524  160 PRO  CD   -44.86745  22.66200 -42.32744 1S   178    1.00000
 2525  160 PRO  HD1  -44.65457  21.66174 -41.90081 1S   178    0.00000
 2526  160 PRO  HD2  -44.81391  22.62748 -43.43726 1S   178    0.00000
 2527  160 PRO  CA   -44.59626  24.96276 -41.64503 1S   178    1.00000
 2528  160 PRO  HA   -44.12377  25.70809 -42.27048 1S   178    0.00000
 2529  160 PRO  CB   -46.06514  24.69300 -42.02206 1S   178    1.00000
 2530  160 PRO  HB1  -46.21978  24.96842 -43.08834 1S   178    0.00000
 2531  160 PRO  HB2  -46.79305  25.25166 -41.39958 1S   178    0.00000
 2532  160 PRO  CG   -46.22925  23.17589 -41.87707 1S   178    1.00000
 2533  160 PRO  HG1  -46.38262  22.91363 -40.80671 1S   178    0.00000
 2534  160 PRO  HG2  -47.06365  22.77074 -42.48167 1S   178    0.00000
 2535  160 PRO  C    -44.50435  25.42734 -40.21042 1S   178    1.00000
 2536  160 PRO  O    -44.43316  26.63356 -39.98177 1S   178    1.00000
 2537  161 LEU  N    -44.48292  24.48709 -39.23961 1S   179    1.00000
 2538  161 LEU  HN   -44.56902  23.52110 -39.46991 1S   179    0.00000
 2539  161 LEU  CA   -44.37423  24.77992 -37.83146 1S   179    1.00000
 2540  161 LEU  HA   -45.12092  25.51957 -37.57807 1S   179    0.00000
 2541  161 LEU  CB   -44.56714  23.51453 -36.97297 1S   179    1.00000
 2542  161 LEU  HB1  -44.34125  23.73836 -35.90673 1S   179    0.00000
 2543  161 LEU  HB2  -43.84737  22.73802 -37.31627 1S   179    0.00000
 2544  161 LEU  CG   -45.99119  22.92642 -37.03970 1S   179    1.00000
 2545  161 LEU  HG   -46.30924  22.89049 -38.10732 1S   179    0.00000
 2546  161 LEU  CD1  -45.98701  21.48083 -36.52350 1S   179    1.00000
 2547  161 LEU  HD11 -45.66730  21.45073 -35.46028 1S   179    0.00000
 2548  161 LEU  HD12 -45.28858  20.85889 -37.12261 1S   179    0.00000
 2549  161 LEU  HD13 -47.00422  21.04352 -36.60433 1S   179    0.00000
 2550  161 LEU  CD2  -47.01001  23.78745 -36.26804 1S   179    1.00000
 2551  161 LEU  HD21 -47.05771  24.81463 -36.68588 1S   179    0.00000
 2552  161 LEU  HD22 -46.72352  23.85395 -35.19679 1S   179    0.00000
 2553  161 LEU  HD23 -48.02234  23.33572 -36.33443 1S   179    0.00000
 2554  161 LEU  C    -43.02263  25.35175 -37.50623 1S   179    1.00000
 2555  161 LEU  O    -42.92911  26.30171 -36.73432 1S   179    1.00000
 2556  162 TYR  N    -41.94229  24.79972 -38.11212 1S   180    1.00000
 2557  162 TYR  HN   -42.04320  24.02415 -38.73438 1S   180    0.00000
 2558  162 TYR  CA   -40.58433  25.22977 -37.87149 1S   180    1.00000
 2559  162 TYR  HA   -40.46832  25.23895 -36.79702 1S   180    0.00000
 2560  162 TYR  CB   -39.52349  24.27454 -38.48314 1S   180    1.00000
 2561  162 TYR  HB1  -39.38504  24.45799 -39.57014 1S   180    0.00000
 2562  162 TYR  HB2  -39.84943  23.22223 -38.34466 1S   180    0.00000
 2563  162 TYR  CG   -38.20626  24.42215 -37.75817 1S   180    1.00000
 2564  162 TYR  CD1  -38.07453  23.94115 -36.44517 1S   180    1.00000
 2565  162 TYR  HD1  -38.90307  23.43946 -35.97421 1S   180    0.00000
 2566  162 TYR  CE1  -36.88707  24.12424 -35.72940 1S   180    1.00000
 2567  162 TYR  HE1  -36.81811  23.76652 -34.71250 1S   180    0.00000
 2568  162 TYR  CZ   -35.80719  24.78814 -36.32590 1S   180    1.00000
 2569  162 TYR  OH   -34.62472  25.01276 -35.58869 1S   180    1.00000
 2570  162 TYR  HH   -34.82628  24.84470 -34.66515 1S   180    0.00000
 2571  162 TYR  CD2  -37.11117  25.07388 -38.34799 1S   180    1.00000
 2572  162 TYR  HD2  -37.19340  25.45413 -39.34993 1S   180    0.00000
 2573  162 TYR  CE2  -35.91645  25.25617 -37.64058 1S   180    1.00000
 2574  162 TYR  HE2  -35.09104  25.77622 -38.10495 1S   180    0.00000
 2575  162 TYR  C    -40.36200  26.63444 -38.38294 1S   180    1.00000
 2576  162 TYR  O    -39.64563  27.40757 -37.75812 1S   180    1.00000
 2577  163 GLU  N    -41.00892  27.02195 -39.50696 1S   181    1.00000
 2578  163 GLU  HN   -41.58645  26.38691 -40.01668 1S   181    0.00000
 2579  163 GLU  CA   -40.92435  28.36570 -40.04315 1S   181    1.00000
 2580  163 GLU  HA   -39.88353  28.59885 -40.18986 1S   181    0.00000
 2581  163 GLU  CB   -41.63525  28.50232 -41.40534 1S   181    1.00000
 2582  163 GLU  HB1  -41.51599  29.54810 -41.76995 1S   181    0.00000
 2583  163 GLU  HB2  -42.72198  28.29630 -41.28811 1S   181    0.00000
 2584  163 GLU  CG   -41.04504  27.54906 -42.46089 1S   181    1.00000
 2585  163 GLU  HG1  -41.22479  26.49782 -42.17218 1S   181    0.00000
 2586  163 GLU  HG2  -39.94814  27.70826 -42.52532 1S   181    0.00000
 2587  163 GLU  CD   -41.65163  27.77675 -43.84049 1S   181    1.00000
 2588  163 GLU  OE1  -42.65495  28.53053 -43.95208 1S   181    1.00000
 2589  163 GLU  OE2  -41.08769  27.21106 -44.81530 1S   181    1.00000
 2590  163 GLU  C    -41.47885  29.39535 -39.08984 1S   181    1.00000
 2591  163 GLU  O    -40.87979  30.45027 -38.89072 1S   181    1.00000
 2592  164 GLU  N    -42.62602  29.08660 -38.44959 1S   182    1.00000
 2593  164 GLU  HN   -43.08138  28.21246 -38.60676 1S   182    0.00000
 2594  164 GLU  CA   -43.30104  29.98643 -37.54527 1S   182    1.00000
 2595  164 GLU  HA   -43.26495  30.97776 -37.97604 1S   182    0.00000
 2596  164 GLU  CB   -44.77883  29.57650 -37.40234 1S   182    1.00000
 2597  164 GLU  HB1  -44.85512  28.59826 -36.87924 1S   182    0.00000
 2598  164 GLU  HB2  -45.17728  29.43423 -38.43359 1S   182    0.00000
 2599  164 GLU  CG   -45.64221  30.63393 -36.69036 1S   182    1.00000
 2600  164 GLU  HG1  -45.51493  31.62196 -37.18001 1S   182    0.00000
 2601  164 GLU  HG2  -45.31545  30.72357 -35.63379 1S   182    0.00000
 2602  164 GLU  CD   -47.12419  30.25837 -36.71936 1S   182    1.00000
 2603  164 GLU  OE1  -47.53163  29.46041 -37.60413 1S   182    1.00000
 2604  164 GLU  OE2  -47.87170  30.77878 -35.84724 1S   182    1.00000
 2605  164 GLU  C    -42.61725  30.03738 -36.19441 1S   182    1.00000
 2606  164 GLU  O    -42.59154  31.07859 -35.54043 1S   182    1.00000
 2607  165 TYR  N    -41.99087  28.91248 -35.77552 1S   183    1.00000
 2608  165 TYR  HN   -42.07404  28.07256 -36.30992 1S   183    0.00000
 2609  165 TYR  CA   -41.14076  28.79498 -34.60832 1S   183    1.00000
 2610  165 TYR  HA   -41.72391  29.08048 -33.74336 1S   183    0.00000
 2611  165 TYR  CB   -40.69518  27.30745 -34.44354 1S   183    1.00000
 2612  165 TYR  HB1  -40.55058  26.87068 -35.45078 1S   183    0.00000
 2613  165 TYR  HB2  -41.50751  26.73292 -33.95403 1S   183    0.00000
 2614  165 TYR  CG   -39.42310  27.05834 -33.67746 1S   183    1.00000
 2615  165 TYR  CD1  -38.20419  27.02323 -34.37390 1S   183    1.00000
 2616  165 TYR  HD1  -38.19257  27.18263 -35.44072 1S   183    0.00000
 2617  165 TYR  CE1  -37.00509  26.78173 -33.70365 1S   183    1.00000
 2618  165 TYR  HE1  -36.07697  26.78110 -34.25326 1S   183    0.00000
 2619  165 TYR  CZ   -37.01480  26.51368 -32.33498 1S   183    1.00000
 2620  165 TYR  OH   -35.79380  26.21204 -31.70095 1S   183    1.00000
 2621  165 TYR  HH   -35.95409  26.16698 -30.74827 1S   183    0.00000
 2622  165 TYR  CD2  -39.42514  26.82692 -32.29403 1S   183    1.00000
 2623  165 TYR  HD2  -40.35605  26.84759 -31.74697 1S   183    0.00000
 2624  165 TYR  CE2  -38.22691  26.53266 -31.62919 1S   183    1.00000
 2625  165 TYR  HE2  -38.24714  26.31609 -30.57492 1S   183    0.00000
 2626  165 TYR  C    -39.97086  29.75706 -34.70158 1S   183    1.00000
 2627  165 TYR  O    -39.68996  30.46135 -33.73627 1S   183    1.00000
 2628  166 VAL  N    -39.28148  29.82397 -35.87078 1S   184    1.00000
 2629  166 VAL  HN   -39.53225  29.23939 -36.64062 1S   184    0.00000
 2630  166 VAL  CA   -38.13075  30.68421 -36.09225 1S   184    1.00000
 2631  166 VAL  HA   -37.40583  30.45411 -35.32339 1S   184    0.00000
 2632  166 VAL  CB   -37.47569  30.47388 -37.45929 1S   184    1.00000
 2633  166 VAL  HB   -38.24977  30.55005 -38.25555 1S   184    0.00000
 2634  166 VAL  CG1  -36.38661  31.53763 -37.72678 1S   184    1.00000
 2635  166 VAL  HG11 -35.71595  31.61665 -36.84982 1S   184    0.00000
 2636  166 VAL  HG12 -36.83221  32.53555 -37.91731 1S   184    0.00000
 2637  166 VAL  HG13 -35.77989  31.25632 -38.61209 1S   184    0.00000
 2638  166 VAL  CG2  -36.85052  29.06536 -37.51969 1S   184    1.00000
 2639  166 VAL  HG21 -37.57239  28.28280 -37.23141 1S   184    0.00000
 2640  166 VAL  HG22 -35.98079  28.99298 -36.83907 1S   184    0.00000
 2641  166 VAL  HG23 -36.49806  28.85091 -38.55018 1S   184    0.00000
 2642  166 VAL  C    -38.51343  32.13696 -35.93145 1S   184    1.00000
 2643  166 VAL  O    -37.80255  32.88523 -35.26351 1S   184    1.00000
 2644  167 VAL  N    -39.66609  32.55970 -36.51064 1S   185    1.00000
 2645  167 VAL  HN   -40.23387  31.92913 -37.03616 1S   185    0.00000
 2646  167 VAL  CA   -40.15675  33.92368 -36.43126 1S   185    1.00000
 2647  167 VAL  HA   -39.38087  34.56515 -36.82524 1S   185    0.00000
 2648  167 VAL  CB   -41.42681  34.14710 -37.25325 1S   185    1.00000
 2649  167 VAL  HB   -42.18771  33.37912 -36.98702 1S   185    0.00000
 2650  167 VAL  CG1  -42.03109  35.54535 -36.98205 1S   185    1.00000
 2651  167 VAL  HG11 -41.25162  36.33064 -37.07480 1S   185    0.00000
 2652  167 VAL  HG12 -42.47394  35.60126 -35.96528 1S   185    0.00000
 2653  167 VAL  HG13 -42.83778  35.76180 -37.71321 1S   185    0.00000
 2654  167 VAL  CG2  -41.07937  33.99020 -38.74899 1S   185    1.00000
 2655  167 VAL  HG21 -40.68671  32.97724 -38.96773 1S   185    0.00000
 2656  167 VAL  HG22 -40.31534  34.73929 -39.04660 1S   185    0.00000
 2657  167 VAL  HG23 -41.98749  34.15331 -39.36772 1S   185    0.00000
 2658  167 VAL  C    -40.38596  34.32911 -34.99245 1S   185    1.00000
 2659  167 VAL  O    -39.88332  35.35985 -34.55486 1S   185    1.00000
 2660  168 LEU  N    -41.12506  33.51043 -34.21456 1S   186    1.00000
 2661  168 LEU  HN   -41.48438  32.64841 -34.56926 1S   186    0.00000
 2662  168 LEU  CA   -41.52602  33.84804 -32.86717 1S   186    1.00000
 2663  168 LEU  HA   -41.89732  34.86319 -32.88016 1S   186    0.00000
 2664  168 LEU  CB   -42.65075  32.91242 -32.38457 1S   186    1.00000
 2665  168 LEU  HB1  -42.80825  33.01308 -31.28803 1S   186    0.00000
 2666  168 LEU  HB2  -42.34793  31.86332 -32.59550 1S   186    0.00000
 2667  168 LEU  CG   -43.99350  33.20323 -33.09303 1S   186    1.00000
 2668  168 LEU  HG   -43.78273  33.40798 -34.16886 1S   186    0.00000
 2669  168 LEU  CD1  -44.93110  31.98723 -33.04778 1S   186    1.00000
 2670  168 LEU  HD11 -45.17341  31.71720 -31.99907 1S   186    0.00000
 2671  168 LEU  HD12 -44.44307  31.11834 -33.53767 1S   186    0.00000
 2672  168 LEU  HD13 -45.87592  32.21006 -33.58842 1S   186    0.00000
 2673  168 LEU  CD2  -44.68142  34.44554 -32.50331 1S   186    1.00000
 2674  168 LEU  HD21 -44.03267  35.34221 -32.59121 1S   186    0.00000
 2675  168 LEU  HD22 -44.90234  34.27055 -31.42948 1S   186    0.00000
 2676  168 LEU  HD23 -45.63614  34.64853 -33.03235 1S   186    0.00000
 2677  168 LEU  C    -40.37543  33.81598 -31.89172 1S   186    1.00000
 2678  168 LEU  O    -40.29118  34.67161 -31.01470 1S   186    1.00000
 2679  169 LYS  N    -39.43592  32.85497 -32.03925 1S   187    1.00000
 2680  169 LYS  HN   -39.53332  32.14078 -32.73190 1S   187    0.00000
 2681  169 LYS  CA   -38.23601  32.77527 -31.23231 1S   187    1.00000
 2682  169 LYS  HA   -38.52772  32.81674 -30.19273 1S   187    0.00000
 2683  169 LYS  CB   -37.44621  31.48096 -31.50461 1S   187    1.00000
 2684  169 LYS  HB1  -36.41818  31.56296 -31.09156 1S   187    0.00000
 2685  169 LYS  HB2  -37.35873  31.33469 -32.60429 1S   187    0.00000
 2686  169 LYS  CG   -38.08434  30.23877 -30.87270 1S   187    1.00000
 2687  169 LYS  HG1  -37.60009  29.34200 -31.32181 1S   187    0.00000
 2688  169 LYS  HG2  -39.16717  30.20130 -31.11666 1S   187    0.00000
 2689  169 LYS  CD   -37.88982  30.17558 -29.35063 1S   187    1.00000
 2690  169 LYS  HD1  -38.35899  31.05294 -28.85794 1S   187    0.00000
 2691  169 LYS  HD2  -36.80007  30.23309 -29.15891 1S   187    0.00000
 2692  169 LYS  CE   -38.44037  28.87888 -28.75450 1S   187    1.00000
 2693  169 LYS  HE1  -38.02751  28.01745 -29.31675 1S   187    0.00000
 2694  169 LYS  HE2  -39.54750  28.84778 -28.80632 1S   187    0.00000
 2695  169 LYS  NZ   -38.03664  28.70912 -27.34275 1S   187    1.00000
 2696  169 LYS  HZ1  -38.75473  29.09999 -26.70294 1S   187    0.00000
 2697  169 LYS  HZ2  -37.11929  29.17250 -27.18294 1S   187    0.00000
 2698  169 LYS  HZ3  -37.92126  27.68300 -27.16022 1S   187    0.00000
 2699  169 LYS  C    -37.30004  33.92815 -31.48506 1S   187    1.00000
 2700  169 LYS  O    -36.64000  34.40011 -30.56308 1S   187    1.00000
 2701  170 ASN  N    -37.23220  34.42890 -32.73866 1S   188    1.00000
 2702  170 ASN  HN   -37.74374  34.01465 -33.49013 1S   188    0.00000
 2703  170 ASN  CA   -36.44792  35.59563 -33.07461 1S   188    1.00000
 2704  170 ASN  HA   -35.48048  35.49188 -32.60185 1S   188    0.00000
 2705  170 ASN  CB   -36.30429  35.79950 -34.60463 1S   188    1.00000
 2706  170 ASN  HB1  -36.17575  36.87432 -34.85429 1S   188    0.00000
 2707  170 ASN  HB2  -37.21669  35.42948 -35.11703 1S   188    0.00000
 2708  170 ASN  CG   -35.06461  35.06088 -35.12483 1S   188    1.00000
 2709  170 ASN  OD1  -34.14745  34.71980 -34.37160 1S   188    1.00000
 2710  170 ASN  ND2  -35.02130  34.85054 -36.47268 1S   188    1.00000
 2711  170 ASN  HD21 -34.18151  34.49362 -36.87982 1S   188    0.00000
 2712  170 ASN  HD22 -35.81396  35.06785 -37.04147 1S   188    0.00000
 2713  170 ASN  C    -37.05464  36.82917 -32.46477 1S   188    1.00000
 2714  170 ASN  O    -36.32715  37.64338 -31.91125 1S   188    1.00000
 2715  171 GLU  N    -38.39760  36.98427 -32.49166 1S   189    1.00000
 2716  171 GLU  HN   -38.98729  36.33188 -32.96610 1S   189    0.00000
 2717  171 GLU  CA   -39.07718  38.08275 -31.83218 1S   189    1.00000
 2718  171 GLU  HA   -38.68043  39.00495 -32.23323 1S   189    0.00000
 2719  171 GLU  CB   -40.60033  38.05688 -32.07009 1S   189    1.00000
 2720  171 GLU  HB1  -41.08357  38.81399 -31.41032 1S   189    0.00000
 2721  171 GLU  HB2  -41.00207  37.05675 -31.79515 1S   189    0.00000
 2722  171 GLU  CG   -40.98163  38.37881 -33.52796 1S   189    1.00000
 2723  171 GLU  HG1  -40.55012  37.62446 -34.21386 1S   189    0.00000
 2724  171 GLU  HG2  -40.57950  39.37480 -33.80942 1S   189    0.00000
 2725  171 GLU  CD   -42.49766  38.39723 -33.70075 1S   189    1.00000
 2726  171 GLU  OE1  -42.97087  38.26905 -34.86045 1S   189    1.00000
 2727  171 GLU  OE2  -43.21016  38.55985 -32.67726 1S   189    1.00000
 2728  171 GLU  C    -38.83038  38.08639 -30.33926 1S   189    1.00000
 2729  171 GLU  O    -38.59034  39.13873 -29.75257 1S   189    1.00000
 2730  172 MET  N    -38.83671  36.89027 -29.70593 1S   190    1.00000
 2731  172 MET  HN   -39.06243  36.05823 -30.21110 1S   190    0.00000
 2732  172 MET  CA   -38.55050  36.69210 -28.30213 1S   190    1.00000
 2733  172 MET  HA   -39.23992  37.30096 -27.73416 1S   190    0.00000
 2734  172 MET  CB   -38.74769  35.20295 -27.91922 1S   190    1.00000
 2735  172 MET  HB1  -38.14678  34.55632 -28.59141 1S   190    0.00000
 2736  172 MET  HB2  -39.81309  34.95307 -28.11043 1S   190    0.00000
 2737  172 MET  CG   -38.43786  34.82233 -26.45896 1S   190    1.00000
 2738  172 MET  HG1  -39.05905  33.93030 -26.22193 1S   190    0.00000
 2739  172 MET  HG2  -38.78515  35.64513 -25.79718 1S   190    0.00000
 2740  172 MET  SD   -36.68258  34.42664 -26.13490 1S   190    1.00000
 2741  172 MET  CE   -36.90541  33.08811 -24.93274 1S   190    1.00000
 2742  172 MET  HE1  -36.65311  32.10464 -25.38181 1S   190    0.00000
 2743  172 MET  HE2  -37.95149  33.03714 -24.56705 1S   190    0.00000
 2744  172 MET  HE3  -36.24176  33.24071 -24.05566 1S   190    0.00000
 2745  172 MET  C    -37.14826  37.13608 -27.96933 1S   190    1.00000
 2746  172 MET  O    -36.93069  37.86052 -27.00034 1S   190    1.00000
 2747  173 ALA  N    -36.15998  36.71819 -28.78888 1S   191    1.00000
 2748  173 ALA  HN   -36.36161  36.14983 -29.58546 1S   191    0.00000
 2749  173 ALA  CA   -34.76240  36.96989 -28.54821 1S   191    1.00000
 2750  173 ALA  HA   -34.54904  36.69414 -27.52424 1S   191    0.00000
 2751  173 ALA  CB   -33.88234  36.12221 -29.47460 1S   191    1.00000
 2752  173 ALA  HB1  -34.08746  36.34930 -30.54241 1S   191    0.00000
 2753  173 ALA  HB2  -34.09250  35.04467 -29.30345 1S   191    0.00000
 2754  173 ALA  HB3  -32.80627  36.30072 -29.26831 1S   191    0.00000
 2755  173 ALA  C    -34.41129  38.42531 -28.72466 1S   191    1.00000
 2756  173 ALA  O    -33.69914  38.98773 -27.89789 1S   191    1.00000
 2757  174 ARG  N    -34.93279  39.08166 -29.78845 1S   192    1.00000
 2758  174 ARG  HN   -35.50561  38.60385 -30.45383 1S   192    0.00000
 2759  174 ARG  CA   -34.68917  40.48222 -30.06833 1S   192    1.00000
 2760  174 ARG  HA   -33.63124  40.64397 -30.02071 1S   192    0.00000
 2761  174 ARG  CB   -35.17879  40.92260 -31.46149 1S   192    1.00000
 2762  174 ARG  HB1  -34.98911  42.01223 -31.59423 1S   192    0.00000
 2763  174 ARG  HB2  -36.27670  40.75219 -31.53058 1S   192    0.00000
 2764  174 ARG  CG   -34.49264  40.18734 -32.62514 1S   192    1.00000
 2765  174 ARG  HG1  -34.63001  39.09638 -32.49135 1S   192    0.00000
 2766  174 ARG  HG2  -33.39749  40.37542 -32.60228 1S   192    0.00000
 2767  174 ARG  CD   -35.07289  40.62925 -33.97776 1S   192    1.00000
 2768  174 ARG  HD1  -34.56134  41.54091 -34.35518 1S   192    0.00000
 2769  174 ARG  HD2  -36.15472  40.85603 -33.86035 1S   192    0.00000
 2770  174 ARG  NE   -34.97729  39.51340 -34.98005 1S   192    1.00000
 2771  174 ARG  HE   -35.77140  38.92291 -35.10351 1S   192    0.00000
 2772  174 ARG  CZ   -33.87039  39.26991 -35.73741 1S   192    1.00000
 2773  174 ARG  NH1  -33.86083  38.22519 -36.60654 1S   192    1.00000
 2774  174 ARG  HH11 -34.68115  37.66774 -36.72931 1S   192    0.00000
 2775  174 ARG  HH12 -33.03189  38.01612 -37.12035 1S   192    0.00000
 2776  174 ARG  NH2  -32.77161  40.05465 -35.64093 1S   192    1.00000
 2777  174 ARG  HH21 -32.72208  40.72326 -34.89956 1S   192    0.00000
 2778  174 ARG  HH22 -31.92531  39.76936 -36.08527 1S   192    0.00000
 2779  174 ARG  C    -35.31097  41.38968 -29.04270 1S   192    1.00000
 2780  174 ARG  O    -34.73969  42.42425 -28.70520 1S   192    1.00000
 2781  175 ALA  N    -36.48188  41.00417 -28.48895 1S   193    1.00000
 2782  175 ALA  HN   -36.95556  40.18096 -28.79827 1S   193    0.00000
 2783  175 ALA  CA   -37.13515  41.73269 -27.42615 1S   193    1.00000
 2784  175 ALA  HA   -37.21508  42.76682 -27.73205 1S   193    0.00000
 2785  175 ALA  CB   -38.54945  41.18689 -27.17959 1S   193    1.00000
 2786  175 ALA  HB1  -38.50492  40.10943 -26.92083 1S   193    0.00000
 2787  175 ALA  HB2  -39.16313  41.29070 -28.09982 1S   193    0.00000
 2788  175 ALA  HB3  -39.05591  41.74257 -26.36345 1S   193    0.00000
 2789  175 ALA  C    -36.33617  41.68348 -26.13527 1S   193    1.00000
 2790  175 ALA  O    -36.37463  42.62556 -25.34670 1S   193    1.00000
 2791  176 ASN  N    -35.54992  40.59832 -25.92030 1S   194    1.00000
 2792  176 ASN  HN   -35.56184  39.83050 -26.55772 1S   194    0.00000
 2793  176 ASN  CA   -34.60798  40.48054 -24.82232 1S   194    1.00000
 2794  176 ASN  HA   -34.95275  41.08738 -23.99505 1S   194    0.00000
 2795  176 ASN  CB   -34.43751  39.00950 -24.36577 1S   194    1.00000
 2796  176 ASN  HB1  -33.54185  38.88362 -23.71871 1S   194    0.00000
 2797  176 ASN  HB2  -34.33317  38.34247 -25.24594 1S   194    0.00000
 2798  176 ASN  CG   -35.63854  38.61816 -23.50875 1S   194    1.00000
 2799  176 ASN  OD1  -35.85980  39.23173 -22.46161 1S   194    1.00000
 2800  176 ASN  ND2  -36.40961  37.58562 -23.94951 1S   194    1.00000
 2801  176 ASN  HD21 -37.21244  37.31373 -23.42155 1S   194    0.00000
 2802  176 ASN  HD22 -36.24571  37.19382 -24.85529 1S   194    0.00000
 2803  176 ASN  C    -33.23577  41.00423 -25.19451 1S   194    1.00000
 2804  176 ASN  O    -32.27059  40.76514 -24.47071 1S   194    1.00000
 2805  177 HSD  N    -33.12006  41.76108 -26.31003 1S   195    1.00000
 2806  177 HSD  HN   -33.91294  41.91252 -26.89841 1S   195    0.00000
 2807  177 HSD  CA   -31.93410  42.49737 -26.69897 1S   195    1.00000
 2808  177 HSD  HA   -32.22993  43.05055 -27.57848 1S   195    0.00000
 2809  177 HSD  CB   -31.46203  43.53232 -25.65002 1S   195    1.00000
 2810  177 HSD  HB1  -30.69834  44.20262 -26.09948 1S   195    0.00000
 2811  177 HSD  HB2  -30.99269  43.00890 -24.78831 1S   195    0.00000
 2812  177 HSD  ND1  -33.15865  44.23195 -23.88805 1S   195    1.00000
 2813  177 HSD  HD1  -32.88293  43.56435 -23.19442 1S   195    0.00000
 2814  177 HSD  CG   -32.59212  44.37793 -25.13657 1S   195    1.00000
 2815  177 HSD  CE1  -34.15614  45.14551 -23.80163 1S   195    1.00000
 2816  177 HSD  HE1  -34.77768  45.25857 -22.91465 1S   195    0.00000
 2817  177 HSD  NE2  -34.27216  45.86251 -24.90287 1S   195    1.00000
 2818  177 HSD  CD2  -33.28778  45.37629 -25.74474 1S   195    1.00000
 2819  177 HSD  HD2  -33.17408  45.79064 -26.73818 1S   195    0.00000
 2820  177 HSD  C    -30.78179  41.61751 -27.11449 1S   195    1.00000
 2821  177 HSD  O    -29.61771  41.98690 -26.96717 1S   195    1.00000
 2822  178 TYR  N    -31.09559  40.43794 -27.68792 1S   196    1.00000
 2823  178 TYR  HN   -32.04458  40.13125 -27.74432 1S   196    0.00000
 2824  178 TYR  CA   -30.14010  39.60367 -28.37542 1S   196    1.00000
 2825  178 TYR  HA   -29.12813  39.89087 -28.12141 1S   196    0.00000
 2826  178 TYR  CB   -30.34645  38.09240 -28.11545 1S   196    1.00000
 2827  178 TYR  HB1  -29.68927  37.48158 -28.77138 1S   196    0.00000
 2828  178 TYR  HB2  -31.40152  37.79904 -28.29473 1S   196    0.00000
 2829  178 TYR  CG   -29.99867  37.78391 -26.68517 1S   196    1.00000
 2830  178 TYR  CD1  -30.94465  37.93525 -25.65700 1S   196    1.00000
 2831  178 TYR  HD1  -31.94175  38.27138 -25.89568 1S   196    0.00000
 2832  178 TYR  CE1  -30.60405  37.66604 -24.32530 1S   196    1.00000
 2833  178 TYR  HE1  -31.33840  37.79910 -23.54455 1S   196    0.00000
 2834  178 TYR  CZ   -29.31113  37.23048 -24.01006 1S   196    1.00000
 2835  178 TYR  OH   -28.95603  36.96378 -22.67074 1S   196    1.00000
 2836  178 TYR  HH   -28.01943  36.75361 -22.64966 1S   196    0.00000
 2837  178 TYR  CD2  -28.70646  37.34876 -26.35478 1S   196    1.00000
 2838  178 TYR  HD2  -27.97428  37.21702 -27.13657 1S   196    0.00000
 2839  178 TYR  CE2  -28.36555  37.06377 -25.02726 1S   196    1.00000
 2840  178 TYR  HE2  -27.37174  36.71974 -24.78991 1S   196    0.00000
 2841  178 TYR  C    -30.36654  39.89715 -29.82834 1S   196    1.00000
 2842  178 TYR  O    -31.39402  40.45323 -30.20309 1S   196    1.00000
 2843  179 GLU  N    -29.40463  39.56202 -30.70940 1S   197    1.00000
 2844  179 GLU  HN   -28.55083  39.12108 -30.43201 1S   197    0.00000
 2845  179 GLU  CA   -29.55893  39.88002 -32.11215 1S   197    1.00000
 2846  179 GLU  HA   -30.10285  40.81183 -32.19319 1S   197    0.00000
 2847  179 GLU  CB   -28.22448  40.12983 -32.85260 1S   197    1.00000
 2848  179 GLU  HB1  -27.75058  41.00199 -32.34844 1S   197    0.00000
 2849  179 GLU  HB2  -28.42101  40.42248 -33.90720 1S   197    0.00000
 2850  179 GLU  CG   -27.26466  38.93217 -32.82901 1S   197    1.00000
 2851  179 GLU  HG1  -27.56001  38.17742 -33.58664 1S   197    0.00000
 2852  179 GLU  HG2  -27.34453  38.47054 -31.83306 1S   197    0.00000
 2853  179 GLU  CD   -25.79947  39.32437 -33.01776 1S   197    1.00000
 2854  179 GLU  OE1  -25.40914  40.43721 -32.57536 1S   197    1.00000
 2855  179 GLU  OE2  -25.04137  38.48571 -33.57642 1S   197    1.00000
 2856  179 GLU  C    -30.38971  38.83543 -32.80271 1S   197    1.00000
 2857  179 GLU  O    -31.01419  39.15112 -33.80248 1S   197    1.00000
 2858  180 ASP  N    -30.46230  37.59217 -32.27819 1S   198    1.00000
 2859  180 ASP  HN   -29.94592  37.33224 -31.46593 1S   198    0.00000
 2860  180 ASP  CA   -31.36530  36.58944 -32.79171 1S   198    1.00000
 2861  180 ASP  HA   -32.35957  37.01657 -32.80496 1S   198    0.00000
 2862  180 ASP  CB   -31.01640  36.07417 -34.21977 1S   198    1.00000
 2863  180 ASP  HB1  -31.18149  36.90416 -34.94054 1S   198    0.00000
 2864  180 ASP  HB2  -31.69131  35.24960 -34.51997 1S   198    0.00000
 2865  180 ASP  CG   -29.56439  35.61146 -34.34794 1S   198    1.00000
 2866  180 ASP  OD1  -29.22984  34.53775 -33.78556 1S   198    1.00000
 2867  180 ASP  OD2  -28.77124  36.31966 -35.02028 1S   198    1.00000
 2868  180 ASP  C    -31.37967  35.47391 -31.78104 1S   198    1.00000
 2869  180 ASP  O    -30.76952  35.58458 -30.71981 1S   198    1.00000
 2870  181 TYR  N    -32.09552  34.36460 -32.08065 1S   199    1.00000
 2871  181 TYR  HN   -32.59451  34.29317 -32.94299 1S   199    0.00000
 2872  181 TYR  CA   -32.27345  33.26280 -31.16117 1S   199    1.00000
 2873  181 TYR  HA   -32.46045  33.69750 -30.19146 1S   199    0.00000
 2874  181 TYR  CB   -33.48937  32.39324 -31.56734 1S   199    1.00000
 2875  181 TYR  HB1  -33.28530  31.88685 -32.53579 1S   199    0.00000
 2876  181 TYR  HB2  -34.38041  33.04386 -31.69658 1S   199    0.00000
 2877  181 TYR  CG   -33.84218  31.35840 -30.52386 1S   199    1.00000
 2878  181 TYR  CD1  -33.95281  31.68130 -29.15729 1S   199    1.00000
 2879  181 TYR  HD1  -33.80137  32.69435 -28.81833 1S   199    0.00000
 2880  181 TYR  CE1  -34.25876  30.69310 -28.21364 1S   199    1.00000
 2881  181 TYR  HE1  -34.34142  30.95593 -27.16935 1S   199    0.00000
 2882  181 TYR  CZ   -34.48704  29.37587 -28.62920 1S   199    1.00000
 2883  181 TYR  OH   -34.86724  28.39713 -27.68666 1S   199    1.00000
 2884  181 TYR  HH   -35.09220  27.58961 -28.16688 1S   199    0.00000
 2885  181 TYR  CD2  -34.07677  30.03509 -30.92318 1S   199    1.00000
 2886  181 TYR  HD2  -34.01923  29.77914 -31.96682 1S   199    0.00000
 2887  181 TYR  CE2  -34.40195  29.05020 -29.98783 1S   199    1.00000
 2888  181 TYR  HE2  -34.59107  28.04334 -30.32234 1S   199    0.00000
 2889  181 TYR  C    -31.02751  32.40564 -31.05070 1S   199    1.00000
 2890  181 TYR  O    -30.78887  31.77024 -30.02567 1S   199    1.00000
 2891  182 GLY  N    -30.17056  32.39215 -32.09217 1S   200    1.00000
 2892  182 GLY  HN   -30.35453  32.91405 -32.92383 1S   200    0.00000
 2893  182 GLY  CA   -28.89036  31.72363 -32.04246 1S   200    1.00000
 2894  182 GLY  HA1  -28.47381  31.75728 -33.03771 1S   200    0.00000
 2895  182 GLY  HA2  -29.03956  30.71917 -31.66969 1S   200    0.00000
 2896  182 GLY  C    -27.95983  32.44780 -31.11331 1S   200    1.00000
 2897  182 GLY  O    -27.25938  31.82063 -30.32676 1S   200    1.00000
 2898  183 ASP  N    -27.96205  33.80014 -31.16082 1S   201    1.00000
 2899  183 ASP  HN   -28.50707  34.27623 -31.85159 1S   201    0.00000
 2900  183 ASP  CA   -27.21845  34.65676 -30.26157 1S   201    1.00000
 2901  183 ASP  HA   -26.18291  34.35191 -30.30472 1S   201    0.00000
 2902  183 ASP  CB   -27.33745  36.13076 -30.70396 1S   201    1.00000
 2903  183 ASP  HB1  -28.39267  36.46719 -30.65675 1S   201    0.00000
 2904  183 ASP  HB2  -27.00655  36.20492 -31.76292 1S   201    0.00000
 2905  183 ASP  CG   -26.46506  37.07383 -29.87525 1S   201    1.00000
 2906  183 ASP  OD1  -25.27027  36.74311 -29.66136 1S   201    1.00000
 2907  183 ASP  OD2  -26.98622  38.13786 -29.44630 1S   201    1.00000
 2908  183 ASP  C    -27.68490  34.49281 -28.83598 1S   201    1.00000
 2909  183 ASP  O    -26.86607  34.44205 -27.92404 1S   201    1.00000
 2910  184 TYR  N    -29.01337  34.34829 -28.62221 1S   202    1.00000
 2911  184 TYR  HN   -29.65305  34.44008 -29.38364 1S   202    0.00000
 2912  184 TYR  CA   -29.61915  34.02579 -27.34514 1S   202    1.00000
 2913  184 TYR  HA   -29.38972  34.83156 -26.66629 1S   202    0.00000
 2914  184 TYR  CB   -31.16521  33.92198 -27.49659 1S   202    1.00000
 2915  184 TYR  HB1  -31.42596  33.14977 -28.24165 1S   202    0.00000
 2916  184 TYR  HB2  -31.55370  34.89527 -27.86747 1S   202    0.00000
 2917  184 TYR  CG   -31.89913  33.57274 -26.22864 1S   202    1.00000
 2918  184 TYR  CD1  -31.98093  32.23381 -25.80446 1S   202    1.00000
 2919  184 TYR  HD1  -31.51748  31.45511 -26.39190 1S   202    0.00000
 2920  184 TYR  CE1  -32.64341  31.89774 -24.62012 1S   202    1.00000
 2921  184 TYR  HE1  -32.67388  30.86593 -24.30144 1S   202    0.00000
 2922  184 TYR  CZ   -33.26091  32.89940 -23.86044 1S   202    1.00000
 2923  184 TYR  OH   -33.91883  32.56765 -22.65727 1S   202    1.00000
 2924  184 TYR  HH   -33.73878  31.64359 -22.46962 1S   202    0.00000
 2925  184 TYR  CD2  -32.54016  34.56493 -25.47106 1S   202    1.00000
 2926  184 TYR  HD2  -32.51049  35.59272 -25.79933 1S   202    0.00000
 2927  184 TYR  CE2  -33.22194  34.23159 -24.29406 1S   202    1.00000
 2928  184 TYR  HE2  -33.70816  35.00594 -23.71889 1S   202    0.00000
 2929  184 TYR  C    -29.01531  32.75864 -26.76725 1S   202    1.00000
 2930  184 TYR  O    -28.62671  32.73283 -25.60116 1S   202    1.00000
 2931  185 TRP  N    -28.89175  31.69183 -27.59046 1S   203    1.00000
 2932  185 TRP  HN   -29.22997  31.73134 -28.52951 1S   203    0.00000
 2933  185 TRP  CA   -28.30367  30.43121 -27.19057 1S   203    1.00000
 2934  185 TRP  HA   -28.76826  30.14411 -26.25985 1S   203    0.00000
 2935  185 TRP  CB   -28.51301  29.33110 -28.25623 1S   203    1.00000
 2936  185 TRP  HB1  -27.75547  28.52471 -28.14720 1S   203    0.00000
 2937  185 TRP  HB2  -28.39473  29.76208 -29.27351 1S   203    0.00000
 2938  185 TRP  CG   -29.85640  28.64901 -28.14661 1S   203    1.00000
 2939  185 TRP  CD1  -30.72241  28.62369 -27.08633 1S   203    1.00000
 2940  185 TRP  HD1  -30.59100  29.14369 -26.14938 1S   203    0.00000
 2941  185 TRP  NE1  -31.79340  27.82002 -27.36441 1S   203    1.00000
 2942  185 TRP  HE1  -32.57066  27.68357 -26.78738 1S   203    0.00000
 2943  185 TRP  CE2  -31.63997  27.30129 -28.62422 1S   203    1.00000
 2944  185 TRP  CD2  -30.42918  27.79764 -29.15529 1S   203    1.00000
 2945  185 TRP  CE3  -29.99035  27.42996 -30.42217 1S   203    1.00000
 2946  185 TRP  HE3  -29.06177  27.78530 -30.84080 1S   203    0.00000
 2947  185 TRP  CZ3  -30.80674  26.56374 -31.16420 1S   203    1.00000
 2948  185 TRP  HZ3  -30.49689  26.26172 -32.15209 1S   203    0.00000
 2949  185 TRP  CZ2  -32.44173  26.44140 -29.36062 1S   203    1.00000
 2950  185 TRP  HZ2  -33.37416  26.06184 -28.97021 1S   203    0.00000
 2951  185 TRP  CH2  -32.02377  26.09520 -30.64776 1S   203    1.00000
 2952  185 TRP  HH2  -32.65517  25.46118 -31.25039 1S   203    0.00000
 2953  185 TRP  C    -26.84080  30.52700 -26.86940 1S   203    1.00000
 2954  185 TRP  O    -26.38910  29.92643 -25.89597 1S   203    1.00000
 2955  186 ARG  N    -26.06552  31.32021 -27.64051 1S   204    1.00000
 2956  186 ARG  HN   -26.44038  31.78661 -28.44070 1S   204    0.00000
 2957  186 ARG  CA   -24.65936  31.54166 -27.37624 1S   204    1.00000
 2958  186 ARG  HA   -24.19251  30.57280 -27.26158 1S   204    0.00000
 2959  186 ARG  CB   -23.96499  32.27438 -28.54127 1S   204    1.00000
 2960  186 ARG  HB1  -22.91033  32.49834 -28.26161 1S   204    0.00000
 2961  186 ARG  HB2  -24.48224  33.23769 -28.74289 1S   204    0.00000
 2962  186 ARG  CG   -23.93334  31.42570 -29.82098 1S   204    1.00000
 2963  186 ARG  HG1  -24.96008  31.26144 -30.20221 1S   204    0.00000
 2964  186 ARG  HG2  -23.52656  30.42487 -29.55869 1S   204    0.00000
 2965  186 ARG  CD   -23.05812  32.01616 -30.93109 1S   204    1.00000
 2966  186 ARG  HD1  -22.94152  31.29485 -31.76818 1S   204    0.00000
 2967  186 ARG  HD2  -22.04809  32.24912 -30.53196 1S   204    0.00000
 2968  186 ARG  NE   -23.66006  33.29547 -31.44697 1S   204    1.00000
 2969  186 ARG  HE   -23.31345  34.16291 -31.10087 1S   204    0.00000
 2970  186 ARG  CZ   -24.62492  33.31986 -32.41284 1S   204    1.00000
 2971  186 ARG  NH1  -25.14850  32.17102 -32.91498 1S   204    1.00000
 2972  186 ARG  HH11 -24.84982  31.29110 -32.54149 1S   204    0.00000
 2973  186 ARG  HH12 -25.87375  32.20584 -33.59220 1S   204    0.00000
 2974  186 ARG  NH2  -25.07083  34.51104 -32.89377 1S   204    1.00000
 2975  186 ARG  HH21 -24.73131  35.36657 -32.50555 1S   204    0.00000
 2976  186 ARG  HH22 -25.83508  34.52932 -33.53813 1S   204    0.00000
 2977  186 ARG  C    -24.41758  32.31748 -26.09548 1S   204    1.00000
 2978  186 ARG  O    -23.28860  32.37760 -25.61113 1S   204    1.00000
 2979  187 GLY  N    -25.49408  32.87849 -25.48999 1S   205    1.00000
 2980  187 GLY  HN   -26.38933  32.82778 -25.93044 1S   205    0.00000
 2981  187 GLY  CA   -25.49288  33.55040 -24.20988 1S   205    1.00000
 2982  187 GLY  HA1  -26.50872  33.86976 -24.02971 1S   205    0.00000
 2983  187 GLY  HA2  -24.79634  34.36979 -24.26970 1S   205    0.00000
 2984  187 GLY  C    -25.06723  32.70289 -23.04815 1S   205    1.00000
 2985  187 GLY  O    -24.63110  33.24477 -22.03541 1S   205    1.00000
 2986  188 ASP  N    -25.14612  31.35310 -23.16234 1S   206    1.00000
 2987  188 ASP  HN   -25.52117  30.92719 -23.98389 1S   206    0.00000
 2988  188 ASP  CA   -24.72146  30.43393 -22.12404 1S   206    1.00000
 2989  188 ASP  HA   -25.27502  30.69574 -21.23234 1S   206    0.00000
 2990  188 ASP  CB   -25.04311  28.96300 -22.51059 1S   206    1.00000
 2991  188 ASP  HB1  -24.36479  28.61695 -23.31861 1S   206    0.00000
 2992  188 ASP  HB2  -26.08540  28.89735 -22.88943 1S   206    0.00000
 2993  188 ASP  CG   -24.92100  28.03680 -21.29817 1S   206    1.00000
 2994  188 ASP  OD1  -25.80359  28.10265 -20.40229 1S   206    1.00000
 2995  188 ASP  OD2  -23.92940  27.26642 -21.24849 1S   206    1.00000
 2996  188 ASP  C    -23.23393  30.56809 -21.81882 1S   206    1.00000
 2997  188 ASP  O    -22.79832  30.32273 -20.69541 1S   206    1.00000
 2998  189 TYR  N    -22.42545  30.98387 -22.82018 1S   207    1.00000
 2999  189 TYR  HN   -22.79837  31.22073 -23.71503 1S   207    0.00000
 3000  189 TYR  CA   -20.98725  31.05913 -22.70219 1S   207    1.00000
 3001  189 TYR  HA   -20.66033  30.41491 -21.89651 1S   207    0.00000
 3002  189 TYR  CB   -20.27727  30.61414 -24.00627 1S   207    1.00000
 3003  189 TYR  HB1  -19.17326  30.69161 -23.90102 1S   207    0.00000
 3004  189 TYR  HB2  -20.60079  31.23828 -24.86664 1S   207    0.00000
 3005  189 TYR  CG   -20.61667  29.17590 -24.30290 1S   207    1.00000
 3006  189 TYR  CD1  -21.78555  28.84734 -25.01365 1S   207    1.00000
 3007  189 TYR  HD1  -22.44413  29.63136 -25.35708 1S   207    0.00000
 3008  189 TYR  CE1  -22.11511  27.51358 -25.27310 1S   207    1.00000
 3009  189 TYR  HE1  -23.02065  27.28148 -25.81464 1S   207    0.00000
 3010  189 TYR  CZ   -21.27056  26.49131 -24.83069 1S   207    1.00000
 3011  189 TYR  OH   -21.60788  25.14911 -25.08049 1S   207    1.00000
 3012  189 TYR  HH   -22.54936  25.11957 -25.29807 1S   207    0.00000
 3013  189 TYR  CD2  -19.77561  28.13736 -23.86516 1S   207    1.00000
 3014  189 TYR  HD2  -18.87403  28.37042 -23.31773 1S   207    0.00000
 3015  189 TYR  CE2  -20.09994  26.80084 -24.13021 1S   207    1.00000
 3016  189 TYR  HE2  -19.45605  26.00791 -23.78354 1S   207    0.00000
 3017  189 TYR  C    -20.53846  32.46411 -22.37072 1S   207    1.00000
 3018  189 TYR  O    -19.34852  32.70455 -22.18862 1S   207    1.00000
 3019  190 GLU  N    -21.46498  33.44196 -22.26588 1S   208    1.00000
 3020  190 GLU  HN   -22.43856  33.25618 -22.38251 1S   208    0.00000
 3021  190 GLU  CA   -21.10644  34.82332 -22.03584 1S   208    1.00000
 3022  190 GLU  HA   -20.31640  35.06980 -22.73053 1S   208    0.00000
 3023  190 GLU  CB   -22.29547  35.76459 -22.31068 1S   208    1.00000
 3024  190 GLU  HB1  -23.07288  35.62879 -21.52590 1S   208    0.00000
 3025  190 GLU  HB2  -22.74790  35.45859 -23.27971 1S   208    0.00000
 3026  190 GLU  CG   -21.89764  37.24817 -22.40697 1S   208    1.00000
 3027  190 GLU  HG1  -21.08305  37.36533 -23.15352 1S   208    0.00000
 3028  190 GLU  HG2  -21.52632  37.60501 -21.42388 1S   208    0.00000
 3029  190 GLU  CD   -23.08255  38.10965 -22.83263 1S   208    1.00000
 3030  190 GLU  OE1  -24.22465  37.58259 -22.90430 1S   208    1.00000
 3031  190 GLU  OE2  -22.85476  39.31921 -23.10227 1S   208    1.00000
 3032  190 GLU  C    -20.62009  35.06479 -20.62128 1S   208    1.00000
 3033  190 GLU  O    -21.20548  34.57163 -19.65867 1S   208    1.00000
 3034  191 VAL  N    -19.51618  35.83702 -20.48202 1S   209    1.00000
 3035  191 VAL  HN   -19.04124  36.18986 -21.28840 1S   209    0.00000
 3036  191 VAL  CA   -18.98114  36.28259 -19.21687 1S   209    1.00000
 3037  191 VAL  HA   -19.73130  36.17697 -18.44533 1S   209    0.00000
 3038  191 VAL  CB   -17.70457  35.55156 -18.80644 1S   209    1.00000
 3039  191 VAL  HB   -16.95343  35.62646 -19.62414 1S   209    0.00000
 3040  191 VAL  CG1  -17.09980  36.18533 -17.53188 1S   209    1.00000
 3041  191 VAL  HG11 -17.81919  36.12880 -16.68883 1S   209    0.00000
 3042  191 VAL  HG12 -16.81819  37.24621 -17.69155 1S   209    0.00000
 3043  191 VAL  HG13 -16.17126  35.65258 -17.24807 1S   209    0.00000
 3044  191 VAL  CG2  -18.02558  34.05364 -18.60241 1S   209    1.00000
 3045  191 VAL  HG21 -18.41954  33.59836 -19.53453 1S   209    0.00000
 3046  191 VAL  HG22 -18.78195  33.92867 -17.79878 1S   209    0.00000
 3047  191 VAL  HG23 -17.10806  33.49809 -18.31987 1S   209    0.00000
 3048  191 VAL  C    -18.69436  37.75173 -19.40548 1S   209    1.00000
 3049  191 VAL  O    -18.07653  38.14817 -20.39213 1S   209    1.00000
 3050  192 ASN  N    -19.15104  38.59476 -18.44961 1S   210    1.00000
 3051  192 ASN  HN   -19.65174  38.25615 -17.65740 1S   210    0.00000
 3052  192 ASN  CA   -18.91732  40.01961 -18.46818 1S   210    1.00000
 3053  192 ASN  HA   -18.15172  40.26783 -19.19293 1S   210    0.00000
 3054  192 ASN  CB   -20.20699  40.83739 -18.72315 1S   210    1.00000
 3055  192 ASN  HB1  -20.03911  41.91601 -18.51168 1S   210    0.00000
 3056  192 ASN  HB2  -21.02175  40.47189 -18.06254 1S   210    0.00000
 3057  192 ASN  CG   -20.60683  40.71914 -20.19509 1S   210    1.00000
 3058  192 ASN  OD1  -19.89229  41.20360 -21.07922 1S   210    1.00000
 3059  192 ASN  ND2  -21.77987  40.07504 -20.45261 1S   210    1.00000
 3060  192 ASN  HD21 -22.08168  39.96231 -21.40271 1S   210    0.00000
 3061  192 ASN  HD22 -22.31198  39.67869 -19.70629 1S   210    0.00000
 3062  192 ASN  C    -18.41425  40.43340 -17.11473 1S   210    1.00000
 3063  192 ASN  O    -18.80071  39.87089 -16.09118 1S   210    1.00000
 3064  193 GLY  N    -17.54526  41.47159 -17.10200 1S   211    1.00000
 3065  193 GLY  HN   -17.18448  41.83274 -17.95927 1S   211    0.00000
 3066  193 GLY  CA   -17.14580  42.19772 -15.91874 1S   211    1.00000
 3067  193 GLY  HA1  -18.04198  42.46947 -15.37957 1S   211    0.00000
 3068  193 GLY  HA2  -16.58835  43.05567 -16.26447 1S   211    0.00000
 3069  193 GLY  C    -16.25295  41.43293 -14.98650 1S   211    1.00000
 3070  193 GLY  O    -16.29022  41.66616 -13.77991 1S   211    1.00000
 3071  194 VAL  N    -15.42041  40.51068 -15.51878 1S   212    1.00000
 3072  194 VAL  HN   -15.43040  40.30177 -16.49899 1S   212    0.00000
 3073  194 VAL  CA   -14.41555  39.82290 -14.74315 1S   212    1.00000
 3074  194 VAL  HA   -14.22524  40.36540 -13.82670 1S   212    0.00000
 3075  194 VAL  CB   -14.74613  38.36512 -14.41713 1S   212    1.00000
 3076  194 VAL  HB   -14.72340  37.74077 -15.33903 1S   212    0.00000
 3077  194 VAL  CG1  -13.70908  37.81881 -13.41251 1S   212    1.00000
 3078  194 VAL  HG11 -13.72400  38.41994 -12.47885 1S   212    0.00000
 3079  194 VAL  HG12 -12.68623  37.85099 -13.83912 1S   212    0.00000
 3080  194 VAL  HG13 -13.94683  36.76553 -13.15284 1S   212    0.00000
 3081  194 VAL  CG2  -16.17148  38.27260 -13.83492 1S   212    1.00000
 3082  194 VAL  HG21 -16.93043  38.50057 -14.61249 1S   212    0.00000
 3083  194 VAL  HG22 -16.28815  38.99077 -12.99805 1S   212    0.00000
 3084  194 VAL  HG23 -16.36599  37.25066 -13.44953 1S   212    0.00000
 3085  194 VAL  C    -13.18698  39.89461 -15.60468 1S   212    1.00000
 3086  194 VAL  O    -13.07792  39.17123 -16.59283 1S   212    1.00000
 3087  195 ASP  N    -12.23052  40.79341 -15.25775 1S   213    1.00000
 3088  195 ASP  HN   -12.33305  41.36911 -14.45077 1S   213    0.00000
 3089  195 ASP  CA   -11.04962  41.06661 -16.05367 1S   213    1.00000
 3090  195 ASP  HA   -11.38719  41.38456 -17.03227 1S   213    0.00000
 3091  195 ASP  CB   -10.14042  42.15607 -15.42533 1S   213    1.00000
 3092  195 ASP  HB1   -9.11111  42.11180 -15.84418 1S   213    0.00000
 3093  195 ASP  HB2  -10.07836  42.00205 -14.32732 1S   213    0.00000
 3094  195 ASP  CG   -10.69131  43.54723 -15.72575 1S   213    1.00000
 3095  195 ASP  OD1  -10.72133  43.91396 -16.93082 1S   213    1.00000
 3096  195 ASP  OD2  -11.06949  44.26212 -14.76136 1S   213    1.00000
 3097  195 ASP  C    -10.20776  39.83056 -16.24367 1S   213    1.00000
 3098  195 ASP  O     -9.87851  39.12298 -15.29305 1S   213    1.00000
 3099  196 GLY  N     -9.87274  39.54104 -17.52158 1S   214    1.00000
 3100  196 GLY  HN   -10.15806  40.13496 -18.27041 1S   214    0.00000
 3101  196 GLY  CA    -9.05970  38.40926 -17.89100 1S   214    1.00000
 3102  196 GLY  HA1   -8.28768  38.28031 -17.14457 1S   214    0.00000
 3103  196 GLY  HA2   -8.66041  38.62216 -18.87125 1S   214    0.00000
 3104  196 GLY  C     -9.84277  37.12992 -17.98532 1S   214    1.00000
 3105  196 GLY  O     -9.24384  36.07317 -18.15635 1S   214    1.00000
 3106  197 TYR  N    -11.18956  37.17535 -17.86811 1S   215    1.00000
 3107  197 TYR  HN   -11.66984  38.03368 -17.69376 1S   215    0.00000
 3108  197 TYR  CA   -12.00818  35.98162 -17.89142 1S   215    1.00000
 3109  197 TYR  HA   -11.48376  35.18420 -18.40156 1S   215    0.00000
 3110  197 TYR  CB   -12.43037  35.52771 -16.47166 1S   215    1.00000
 3111  197 TYR  HB1  -13.20289  34.73189 -16.50291 1S   215    0.00000
 3112  197 TYR  HB2  -12.83225  36.38697 -15.89445 1S   215    0.00000
 3113  197 TYR  CG   -11.24610  34.95428 -15.75076 1S   215    1.00000
 3114  197 TYR  CD1  -10.78245  33.66286 -16.05657 1S   215    1.00000
 3115  197 TYR  HD1  -11.27886  33.07576 -16.81223 1S   215    0.00000
 3116  197 TYR  CE1   -9.68329  33.12129 -15.38010 1S   215    1.00000
 3117  197 TYR  HE1   -9.34211  32.12469 -15.62073 1S   215    0.00000
 3118  197 TYR  CZ    -9.01449  33.88637 -14.41547 1S   215    1.00000
 3119  197 TYR  OH    -7.87982  33.38451 -13.74621 1S   215    1.00000
 3120  197 TYR  HH    -7.75550  32.45623 -13.99006 1S   215    0.00000
 3121  197 TYR  CD2  -10.57310  35.70475 -14.77473 1S   215    1.00000
 3122  197 TYR  HD2  -10.90569  36.70462 -14.54249 1S   215    0.00000
 3123  197 TYR  CE2   -9.46035  35.17665 -14.11331 1S   215    1.00000
 3124  197 TYR  HE2   -8.94647  35.76868 -13.37022 1S   215    0.00000
 3125  197 TYR  C    -13.26383  36.22289 -18.68036 1S   215    1.00000
 3126  197 TYR  O    -14.11651  35.34057 -18.75538 1S   215    1.00000
 3127  198 ASP  N    -13.41213  37.40316 -19.32555 1S   216    1.00000
 3128  198 ASP  HN   -12.72580  38.12251 -19.27285 1S   216    0.00000
 3129  198 ASP  CA   -14.58934  37.71863 -20.10513 1S   216    1.00000
 3130  198 ASP  HA   -15.45595  37.48121 -19.50461 1S   216    0.00000
 3131  198 ASP  CB   -14.66203  39.20664 -20.52760 1S   216    1.00000
 3132  198 ASP  HB1  -15.55693  39.38590 -21.16240 1S   216    0.00000
 3133  198 ASP  HB2  -13.75400  39.48510 -21.10303 1S   216    0.00000
 3134  198 ASP  CG   -14.77858  40.10086 -19.29666 1S   216    1.00000
 3135  198 ASP  OD1  -15.49966  39.70356 -18.34512 1S   216    1.00000
 3136  198 ASP  OD2  -14.16035  41.19732 -19.29759 1S   216    1.00000
 3137  198 ASP  C    -14.65555  36.86995 -21.35009 1S   216    1.00000
 3138  198 ASP  O    -13.65515  36.31561 -21.80509 1S   216    1.00000
 3139  199 TYR  N    -15.87443  36.72660 -21.90499 1S   217    1.00000
 3140  199 TYR  HN   -16.68116  37.18240 -21.52907 1S   217    0.00000
 3141  199 TYR  CA   -16.09221  35.88826 -23.04756 1S   217    1.00000
 3142  199 TYR  HA   -15.26566  36.01574 -23.73498 1S   217    0.00000
 3143  199 TYR  CB   -16.27070  34.40331 -22.63476 1S   217    1.00000
 3144  199 TYR  HB1  -17.26396  34.22254 -22.17226 1S   217    0.00000
 3145  199 TYR  HB2  -15.49517  34.13441 -21.88503 1S   217    0.00000
 3146  199 TYR  CG   -16.08814  33.49082 -23.81073 1S   217    1.00000
 3147  199 TYR  CD1  -17.18772  33.11611 -24.59596 1S   217    1.00000
 3148  199 TYR  HD1  -18.17065  33.49755 -24.36246 1S   217    0.00000
 3149  199 TYR  CE1  -17.02354  32.25464 -25.68358 1S   217    1.00000
 3150  199 TYR  HE1  -17.88074  31.97593 -26.27492 1S   217    0.00000
 3151  199 TYR  CZ   -15.75328  31.76075 -25.99515 1S   217    1.00000
 3152  199 TYR  OH   -15.59957  30.87002 -27.06956 1S   217    1.00000
 3153  199 TYR  HH   -14.67657  30.90913 -27.35672 1S   217    0.00000
 3154  199 TYR  CD2  -14.81206  33.00319 -24.14158 1S   217    1.00000
 3155  199 TYR  HD2  -13.95688  33.28632 -23.54552 1S   217    0.00000
 3156  199 TYR  CE2  -14.64293  32.14304 -25.23271 1S   217    1.00000
 3157  199 TYR  HE2  -13.65994  31.76576 -25.47086 1S   217    0.00000
 3158  199 TYR  C    -17.34399  36.41986 -23.68168 1S   217    1.00000
 3159  199 TYR  O    -18.36528  36.56541 -23.01698 1S   217    1.00000
 3160  200 SER  N    -17.29408  36.74788 -24.99065 1S   218    1.00000
 3161  200 SER  HN   -16.46838  36.62521 -25.53508 1S   218    0.00000
 3162  200 SER  CA   -18.43171  37.30572 -25.68447 1S   218    1.00000
 3163  200 SER  HA   -19.09071  37.77306 -24.96487 1S   218    0.00000
 3164  200 SER  CB   -18.03369  38.40914 -26.70424 1S   218    1.00000
 3165  200 SER  HB1  -17.35623  39.12979 -26.19658 1S   218    0.00000
 3166  200 SER  HB2  -18.93629  38.95969 -27.04330 1S   218    0.00000
 3167  200 SER  OG   -17.35686  37.89550 -27.84589 1S   218    1.00000
 3168  200 SER  HG1  -16.97541  38.64738 -28.30668 1S   218    0.00000
 3169  200 SER  C    -19.18866  36.18509 -26.35008 1S   218    1.00000
 3170  200 SER  O    -18.69419  35.06864 -26.48841 1S   218    1.00000
 3171  201 ARG  N    -20.42704  36.46831 -26.79835 1S   219    1.00000
 3172  201 ARG  HN   -20.83954  37.36519 -26.66116 1S   219    0.00000
 3173  201 ARG  CA   -21.26110  35.49050 -27.45428 1S   219    1.00000
 3174  201 ARG  HA   -21.22867  34.57409 -26.87952 1S   219    0.00000
 3175  201 ARG  CB   -22.71631  35.96893 -27.52858 1S   219    1.00000
 3176  201 ARG  HB1  -23.33760  35.19467 -28.03229 1S   219    0.00000
 3177  201 ARG  HB2  -22.78671  36.90705 -28.12234 1S   219    0.00000
 3178  201 ARG  CG   -23.28514  36.21236 -26.12627 1S   219    1.00000
 3179  201 ARG  HG1  -22.81216  37.10569 -25.66394 1S   219    0.00000
 3180  201 ARG  HG2  -23.03165  35.32923 -25.49580 1S   219    0.00000
 3181  201 ARG  CD   -24.80243  36.36716 -26.11430 1S   219    1.00000
 3182  201 ARG  HD1  -25.19216  36.44895 -25.07919 1S   219    0.00000
 3183  201 ARG  HD2  -25.25752  35.47698 -26.59125 1S   219    0.00000
 3184  201 ARG  NE   -25.19331  37.55969 -26.92146 1S   219    1.00000
 3185  201 ARG  HE   -25.31226  37.43851 -27.91020 1S   219    0.00000
 3186  201 ARG  CZ   -25.50224  38.77233 -26.38175 1S   219    1.00000
 3187  201 ARG  NH1  -25.37240  39.01883 -25.05286 1S   219    1.00000
 3188  201 ARG  HH11 -24.96963  38.32338 -24.44511 1S   219    0.00000
 3189  201 ARG  HH12 -25.60526  39.90847 -24.68050 1S   219    0.00000
 3190  201 ARG  NH2  -25.96995  39.75389 -27.19643 1S   219    1.00000
 3191  201 ARG  HH21 -26.13672  39.54026 -28.16163 1S   219    0.00000
 3192  201 ARG  HH22 -26.21537  40.64299 -26.81666 1S   219    0.00000
 3193  201 ARG  C    -20.77527  35.18990 -28.84702 1S   219    1.00000
 3194  201 ARG  O    -20.85935  34.05291 -29.30550 1S   219    1.00000
 3195  202 GLY  N    -20.21423  36.20651 -29.54196 1S   220    1.00000
 3196  202 GLY  HN   -20.14947  37.12092 -29.14996 1S   220    0.00000
 3197  202 GLY  CA   -19.66798  36.04831 -30.87171 1S   220    1.00000
 3198  202 GLY  HA1  -19.48904  37.03986 -31.25943 1S   220    0.00000
 3199  202 GLY  HA2  -20.37264  35.48209 -31.46556 1S   220    0.00000
 3200  202 GLY  C    -18.35645  35.31157 -30.85991 1S   220    1.00000
 3201  202 GLY  O    -17.97598  34.70820 -31.85990 1S   220    1.00000
 3202  203 GLN  N    -17.63884  35.32101 -29.70986 1S   221    1.00000
 3203  203 GLN  HN   -17.96249  35.82235 -28.91003 1S   221    0.00000
 3204  203 GLN  CA   -16.35924  34.66545 -29.54505 1S   221    1.00000
 3205  203 GLN  HA   -15.72768  34.99470 -30.35907 1S   221    0.00000
 3206  203 GLN  CB   -15.70070  35.04761 -28.19509 1S   221    1.00000
 3207  203 GLN  HB1  -16.34079  34.69455 -27.35803 1S   221    0.00000
 3208  203 GLN  HB2  -15.65949  36.15618 -28.13435 1S   221    0.00000
 3209  203 GLN  CG   -14.26904  34.52818 -27.97249 1S   221    1.00000
 3210  203 GLN  HG1  -14.27447  33.42028 -27.94367 1S   221    0.00000
 3211  203 GLN  HG2  -13.88810  34.89933 -26.99733 1S   221    0.00000
 3212  203 GLN  CD   -13.34764  35.03599 -29.08500 1S   221    1.00000
 3213  203 GLN  OE1  -13.36850  36.22276 -29.42841 1S   221    1.00000
 3214  203 GLN  NE2  -12.51669  34.11446 -29.65287 1S   221    1.00000
 3215  203 GLN  HE21 -12.53431  33.15908 -29.34487 1S   221    0.00000
 3216  203 GLN  HE22 -11.91497  34.38860 -30.39867 1S   221    0.00000
 3217  203 GLN  C    -16.49424  33.16352 -29.63150 1S   221    1.00000
 3218  203 GLN  O    -15.57660  32.47928 -30.07895 1S   221    1.00000
 3219  204 LEU  N    -17.67638  32.61812 -29.25078 1S   222    1.00000
 3220  204 LEU  HN   -18.40640  33.19152 -28.88655 1S   222    0.00000
 3221  204 LEU  CA   -17.97607  31.20660 -29.34860 1S   222    1.00000
 3222  204 LEU  HA   -17.19635  30.67300 -28.83439 1S   222    0.00000
 3223  204 LEU  CB   -19.33311  30.83861 -28.71644 1S   222    1.00000
 3224  204 LEU  HB1  -20.14511  31.34538 -29.28135 1S   222    0.00000
 3225  204 LEU  HB2  -19.36968  31.22703 -27.67575 1S   222    0.00000
 3226  204 LEU  CG   -19.60710  29.31604 -28.67442 1S   222    1.00000
 3227  204 LEU  HG   -19.31417  28.86439 -29.64915 1S   222    0.00000
 3228  204 LEU  CD1  -18.77619  28.60617 -27.58784 1S   222    1.00000
 3229  204 LEU  HD11 -19.03611  29.00123 -26.58477 1S   222    0.00000
 3230  204 LEU  HD12 -17.69015  28.76529 -27.75591 1S   222    0.00000
 3231  204 LEU  HD13 -18.97528  27.51391 -27.60317 1S   222    0.00000
 3232  204 LEU  CD2  -21.11135  29.04362 -28.54579 1S   222    1.00000
 3233  204 LEU  HD21 -21.63966  29.49383 -29.41186 1S   222    0.00000
 3234  204 LEU  HD22 -21.51201  29.48987 -27.61373 1S   222    0.00000
 3235  204 LEU  HD23 -21.30669  27.95134 -28.54474 1S   222    0.00000
 3236  204 LEU  C    -17.97267  30.72268 -30.77274 1S   222    1.00000
 3237  204 LEU  O    -17.44258  29.64983 -31.04920 1S   222    1.00000
 3238  205 ILE  N    -18.53085  31.51688 -31.71989 1S   223    1.00000
 3239  205 ILE  HN   -18.94259  32.39059 -31.47161 1S   223    0.00000
 3240  205 ILE  CA   -18.53427  31.20366 -33.13927 1S   223    1.00000
 3241  205 ILE  HA   -19.05430  30.26378 -33.26222 1S   223    0.00000
 3242  205 ILE  CB   -19.23963  32.27452 -33.97771 1S   223    1.00000
 3243  205 ILE  HB   -18.83883  33.27455 -33.69950 1S   223    0.00000
 3244  205 ILE  CG2  -18.97889  32.06825 -35.49096 1S   223    1.00000
 3245  205 ILE  HG21 -19.31717  31.05990 -35.80819 1S   223    0.00000
 3246  205 ILE  HG22 -17.90349  32.18022 -35.74013 1S   223    0.00000
 3247  205 ILE  HG23 -19.51509  32.82911 -36.09211 1S   223    0.00000
 3248  205 ILE  CG1  -20.75363  32.26092 -33.66251 1S   223    1.00000
 3249  205 ILE  HG11 -20.88908  32.40456 -32.57001 1S   223    0.00000
 3250  205 ILE  HG12 -21.16542  31.26258 -33.92827 1S   223    0.00000
 3251  205 ILE  CD   -21.55829  33.34118 -34.39442 1S   223    1.00000
 3252  205 ILE  HD1  -21.46734  33.23677 -35.49473 1S   223    0.00000
 3253  205 ILE  HD2  -21.20670  34.35226 -34.09809 1S   223    0.00000
 3254  205 ILE  HD3  -22.63295  33.25095 -34.14356 1S   223    0.00000
 3255  205 ILE  C    -17.11960  31.00995 -33.63438 1S   223    1.00000
 3256  205 ILE  O    -16.82939  30.03482 -34.32324 1S   223    1.00000
 3257  206 GLU  N    -16.20332  31.92727 -33.25638 1S   224    1.00000
 3258  206 GLU  HN   -16.44604  32.67506 -32.64181 1S   224    0.00000
 3259  206 GLU  CA   -14.84205  31.93971 -33.73313 1S   224    1.00000
 3260  206 GLU  HA   -14.86338  31.82638 -34.80859 1S   224    0.00000
 3261  206 GLU  CB   -14.15027  33.27419 -33.38923 1S   224    1.00000
 3262  206 GLU  HB1  -13.05443  33.20988 -33.57201 1S   224    0.00000
 3263  206 GLU  HB2  -14.30708  33.47629 -32.30630 1S   224    0.00000
 3264  206 GLU  CG   -14.71345  34.42974 -34.24405 1S   224    1.00000
 3265  206 GLU  HG1  -15.79165  34.25353 -34.44677 1S   224    0.00000
 3266  206 GLU  HG2  -14.18300  34.46265 -35.21967 1S   224    0.00000
 3267  206 GLU  CD   -14.58258  35.78759 -33.55446 1S   224    1.00000
 3268  206 GLU  OE1  -15.33115  36.71591 -33.96374 1S   224    1.00000
 3269  206 GLU  OE2  -13.74992  35.91967 -32.62026 1S   224    1.00000
 3270  206 GLU  C    -14.04861  30.79359 -33.17095 1S   224    1.00000
 3271  206 GLU  O    -13.28363  30.17069 -33.89796 1S   224    1.00000
 3272  207 ASP  N    -14.22948  30.45929 -31.87412 1S   225    1.00000
 3273  207 ASP  HN   -14.85037  30.97499 -31.28568 1S   225    0.00000
 3274  207 ASP  CA   -13.48993  29.39449 -31.23221 1S   225    1.00000
 3275  207 ASP  HA   -12.45746  29.46773 -31.54936 1S   225    0.00000
 3276  207 ASP  CB   -13.54747  29.47031 -29.69064 1S   225    1.00000
 3277  207 ASP  HB1  -13.04908  28.58660 -29.23536 1S   225    0.00000
 3278  207 ASP  HB2  -14.60463  29.49939 -29.35159 1S   225    0.00000
 3279  207 ASP  CG   -12.81671  30.72100 -29.20609 1S   225    1.00000
 3280  207 ASP  OD1  -11.90832  31.21599 -29.92339 1S   225    1.00000
 3281  207 ASP  OD2  -13.14516  31.19427 -28.08896 1S   225    1.00000
 3282  207 ASP  C    -13.96695  28.03845 -31.67119 1S   225    1.00000
 3283  207 ASP  O    -13.15285  27.13316 -31.80464 1S   225    1.00000
 3284  208 VAL  N    -15.27868  27.85968 -31.95817 1S   226    1.00000
 3285  208 VAL  HN   -15.94146  28.59545 -31.82244 1S   226    0.00000
 3286  208 VAL  CA   -15.80981  26.63034 -32.51981 1S   226    1.00000
 3287  208 VAL  HA   -15.47992  25.81027 -31.89711 1S   226    0.00000
 3288  208 VAL  CB   -17.33682  26.61454 -32.55999 1S   226    1.00000
 3289  208 VAL  HB   -17.70852  27.60427 -32.91028 1S   226    0.00000
 3290  208 VAL  CG1  -17.87673  25.53243 -33.51789 1S   226    1.00000
 3291  208 VAL  HG11 -17.42558  24.54328 -33.29163 1S   226    0.00000
 3292  208 VAL  HG12 -17.65941  25.79540 -34.57416 1S   226    0.00000
 3293  208 VAL  HG13 -18.97781  25.45373 -33.41558 1S   226    0.00000
 3294  208 VAL  CG2  -17.85822  26.36487 -31.12932 1S   226    1.00000
 3295  208 VAL  HG21 -17.50067  27.14804 -30.43023 1S   226    0.00000
 3296  208 VAL  HG22 -17.51011  25.37621 -30.76155 1S   226    0.00000
 3297  208 VAL  HG23 -18.96855  26.36818 -31.12366 1S   226    0.00000
 3298  208 VAL  C    -15.22409  26.40825 -33.89643 1S   226    1.00000
 3299  208 VAL  O    -14.76325  25.31297 -34.19981 1S   226    1.00000
 3300  209 GLU  N    -15.19179  27.45685 -34.74598 1S   227    1.00000
 3301  209 GLU  HN   -15.56695  28.34453 -34.48233 1S   227    0.00000
 3302  209 GLU  CA   -14.67318  27.38599 -36.09310 1S   227    1.00000
 3303  209 GLU  HA   -15.13627  26.53712 -36.57782 1S   227    0.00000
 3304  209 GLU  CB   -15.05082  28.65500 -36.88464 1S   227    1.00000
 3305  209 GLU  HB1  -14.43948  28.73904 -37.81059 1S   227    0.00000
 3306  209 GLU  HB2  -14.86418  29.55358 -36.25764 1S   227    0.00000
 3307  209 GLU  CG   -16.53315  28.57016 -37.29299 1S   227    1.00000
 3308  209 GLU  HG1  -17.16899  28.34510 -36.41108 1S   227    0.00000
 3309  209 GLU  HG2  -16.60303  27.72334 -38.00216 1S   227    0.00000
 3310  209 GLU  CD   -17.07667  29.82203 -37.97589 1S   227    1.00000
 3311  209 GLU  OE1  -16.39350  30.87774 -37.95989 1S   227    1.00000
 3312  209 GLU  OE2  -18.21068  29.72261 -38.52230 1S   227    1.00000
 3313  209 GLU  C    -13.18351  27.15455 -36.13855 1S   227    1.00000
 3314  209 GLU  O    -12.71007  26.35373 -36.94188 1S   227    1.00000
 3315  210 HSD  N    -12.40718  27.81990 -35.25517 1S   228    1.00000
 3316  210 HSD  HN   -12.80477  28.47868 -34.61636 1S   228    0.00000
 3317  210 HSD  CA   -10.96794  27.68377 -35.19672 1S   228    1.00000
 3318  210 HSD  HA   -10.58343  27.80142 -36.20048 1S   228    0.00000
 3319  210 HSD  CB   -10.30889  28.74315 -34.28849 1S   228    1.00000
 3320  210 HSD  HB1   -9.22209  28.53431 -34.18135 1S   228    0.00000
 3321  210 HSD  HB2  -10.77387  28.70569 -33.27869 1S   228    0.00000
 3322  210 HSD  ND1  -10.17897  31.27513 -34.10303 1S   228    1.00000
 3323  210 HSD  HD1   -9.89958  31.30180 -33.14186 1S   228    0.00000
 3324  210 HSD  CG   -10.44765  30.13873 -34.83548 1S   228    1.00000
 3325  210 HSD  CE1  -10.38927  32.33198 -34.92669 1S   228    1.00000
 3326  210 HSD  HE1  -10.25628  33.36496 -34.60892 1S   228    0.00000
 3327  210 HSD  NE2  -10.76781  31.95711 -36.13303 1S   228    1.00000
 3328  210 HSD  CD2  -10.80396  30.57554 -36.07628 1S   228    1.00000
 3329  210 HSD  HD2  -11.08701  30.01480 -36.95806 1S   228    0.00000
 3330  210 HSD  C    -10.56760  26.31433 -34.72137 1S   228    1.00000
 3331  210 HSD  O     -9.69713  25.69084 -35.32022 1S   228    1.00000
 3332  211 THR  N    -11.22577  25.78943 -33.66204 1S   229    1.00000
 3333  211 THR  HN   -11.92621  26.31162 -33.17863 1S   229    0.00000
 3334  211 THR  CA   -10.96970  24.45486 -33.15707 1S   229    1.00000
 3335  211 THR  HA    -9.90081  24.36462 -33.01489 1S   229    0.00000
 3336  211 THR  CB   -11.63511  24.17392 -31.81290 1S   229    1.00000
 3337  211 THR  HB   -11.49689  23.11070 -31.55811 1S   229    0.00000
 3338  211 THR  OG1  -13.03962  24.38172 -31.82600 1S   229    1.00000
 3339  211 THR  HG1  -13.16420  25.33250 -31.92186 1S   229    0.00000
 3340  211 THR  CG2  -10.99214  25.02085 -30.69445 1S   229    1.00000
 3341  211 THR  HG21 -11.12654  26.10515 -30.88411 1S   229    0.00000
 3342  211 THR  HG22  -9.90343  24.81403 -30.62999 1S   229    0.00000
 3343  211 THR  HG23 -11.45337  24.77855 -29.71297 1S   229    0.00000
 3344  211 THR  C    -11.37347  23.39170 -34.16451 1S   229    1.00000
 3345  211 THR  O    -10.73337  22.34774 -34.26291 1S   229    1.00000
 3346  212 PHE  N    -12.43429  23.64884 -34.96584 1S   230    1.00000
 3347  212 PHE  HN   -12.94574  24.50233 -34.88198 1S   230    0.00000
 3348  212 PHE  CA   -12.95764  22.70573 -35.92900 1S   230    1.00000
 3349  212 PHE  HA   -13.04548  21.75568 -35.41946 1S   230    0.00000
 3350  212 PHE  CB   -14.36123  23.12148 -36.44619 1S   230    1.00000
 3351  212 PHE  HB1  -14.31078  24.09726 -36.97448 1S   230    0.00000
 3352  212 PHE  HB2  -15.05993  23.22113 -35.58877 1S   230    0.00000
 3353  212 PHE  CG   -14.93390  22.07842 -37.36499 1S   230    1.00000
 3354  212 PHE  CD1  -15.25774  20.80309 -36.87595 1S   230    1.00000
 3355  212 PHE  HD1  -15.13782  20.58065 -35.82658 1S   230    0.00000
 3356  212 PHE  CE1  -15.69794  19.80313 -37.74733 1S   230    1.00000
 3357  212 PHE  HE1  -15.93180  18.82628 -37.35548 1S   230    0.00000
 3358  212 PHE  CZ   -15.82378  20.07113 -39.11645 1S   230    1.00000
 3359  212 PHE  HZ   -16.16074  19.30226 -39.79454 1S   230    0.00000
 3360  212 PHE  CD2  -15.05318  22.33706 -38.73959 1S   230    1.00000
 3361  212 PHE  HD2  -14.77895  23.30729 -39.12711 1S   230    0.00000
 3362  212 PHE  CE2  -15.50157  21.33946 -39.61187 1S   230    1.00000
 3363  212 PHE  HE2  -15.59712  21.54662 -40.66672 1S   230    0.00000
 3364  212 PHE  C    -12.00798  22.52035 -37.09071 1S   230    1.00000
 3365  212 PHE  O    -11.88098  21.41253 -37.60709 1S   230    1.00000
 3366  213 GLU  N    -11.29600  23.59063 -37.51306 1S   231    1.00000
 3367  213 GLU  HN   -11.43415  24.49010 -37.10195 1S   231    0.00000
 3368  213 GLU  CA   -10.29288  23.52971 -38.55953 1S   231    1.00000
 3369  213 GLU  HA   -10.77635  23.19142 -39.46473 1S   231    0.00000
 3370  213 GLU  CB    -9.63182  24.90774 -38.80125 1S   231    1.00000
 3371  213 GLU  HB1   -8.63963  24.79253 -39.29280 1S   231    0.00000
 3372  213 GLU  HB2   -9.45079  25.38825 -37.81524 1S   231    0.00000
 3373  213 GLU  CG   -10.48092  25.86260 -39.66124 1S   231    1.00000
 3374  213 GLU  HG1  -10.04425  26.88337 -39.61639 1S   231    0.00000
 3375  213 GLU  HG2  -11.51729  25.90883 -39.26512 1S   231    0.00000
 3376  213 GLU  CD   -10.51827  25.42587 -41.12616 1S   231    1.00000
 3377  213 GLU  OE1   -9.53300  24.81462 -41.61816 1S   231    1.00000
 3378  213 GLU  OE2  -11.55174  25.71555 -41.78263 1S   231    1.00000
 3379  213 GLU  C     -9.19489  22.54420 -38.23355 1S   231    1.00000
 3380  213 GLU  O     -8.72029  21.82218 -39.10688 1S   231    1.00000
 3381  214 GLU  N     -8.79254  22.47200 -36.94738 1S   232    1.00000
 3382  214 GLU  HN    -9.20054  23.05458 -36.24740 1S   232    0.00000
 3383  214 GLU  CA    -7.73247  21.60690 -36.48980 1S   232    1.00000
 3384  214 GLU  HA    -6.92932  21.64916 -37.21282 1S   232    0.00000
 3385  214 GLU  CB    -7.19605  22.08510 -35.12452 1S   232    1.00000
 3386  214 GLU  HB1   -6.26077  21.53141 -34.88610 1S   232    0.00000
 3387  214 GLU  HB2   -7.95785  21.84732 -34.35218 1S   232    0.00000
 3388  214 GLU  CG    -6.92520  23.60437 -35.06983 1S   232    1.00000
 3389  214 GLU  HG1   -7.87888  24.15322 -35.20047 1S   232    0.00000
 3390  214 GLU  HG2   -6.23374  23.90216 -35.88466 1S   232    0.00000
 3391  214 GLU  CD    -6.31819  24.01106 -33.72698 1S   232    1.00000
 3392  214 GLU  OE1   -5.21447  23.50063 -33.39880 1S   232    1.00000
 3393  214 GLU  OE2   -6.94903  24.83765 -33.01446 1S   232    1.00000
 3394  214 GLU  C     -8.19535  20.16487 -36.35718 1S   232    1.00000
 3395  214 GLU  O     -7.37748  19.24793 -36.31943 1S   232    1.00000
 3396  215 ILE  N     -9.53132  19.94033 -36.30041 1S   233    1.00000
 3397  215 ILE  HN   -10.16251  20.71265 -36.33170 1S   233    0.00000
 3398  215 ILE  CA   -10.17262  18.64121 -36.21208 1S   233    1.00000
 3399  215 ILE  HA    -9.54986  17.99180 -35.61207 1S   233    0.00000
 3400  215 ILE  CB   -11.54553  18.76542 -35.54227 1S   233    1.00000
 3401  215 ILE  HB   -11.93574  19.78593 -35.75322 1S   233    0.00000
 3402  215 ILE  CG2  -12.60596  17.76258 -36.06744 1S   233    1.00000
 3403  215 ILE  HG21 -12.22472  16.72157 -36.01376 1S   233    0.00000
 3404  215 ILE  HG22 -12.87980  17.99721 -37.11801 1S   233    0.00000
 3405  215 ILE  HG23 -13.53322  17.82277 -35.46203 1S   233    0.00000
 3406  215 ILE  CG1  -11.37121  18.65138 -34.01263 1S   233    1.00000
 3407  215 ILE  HG11 -10.42079  19.14323 -33.70819 1S   233    0.00000
 3408  215 ILE  HG12 -11.29485  17.57467 -33.74468 1S   233    0.00000
 3409  215 ILE  CD   -12.51929  19.30073 -33.23743 1S   233    1.00000
 3410  215 ILE  HD1  -13.50308  18.94983 -33.61088 1S   233    0.00000
 3411  215 ILE  HD2  -12.47755  20.40464 -33.35165 1S   233    0.00000
 3412  215 ILE  HD3  -12.44400  19.05554 -32.15734 1S   233    0.00000
 3413  215 ILE  C    -10.27283  18.00825 -37.57873 1S   233    1.00000
 3414  215 ILE  O    -10.20742  16.78383 -37.68919 1S   233    1.00000
 3415  216 LYS  N    -10.41852  18.82534 -38.65208 1S   234    1.00000
 3416  216 LYS  HN   -10.44986  19.81533 -38.52979 1S   234    0.00000
 3417  216 LYS  CA   -10.57324  18.37230 -40.02295 1S   234    1.00000
 3418  216 LYS  HA   -11.55721  17.92721 -40.07476 1S   234    0.00000
 3419  216 LYS  CB   -10.53800  19.51472 -41.06066 1S   234    1.00000
 3420  216 LYS  HB1  -10.38426  19.10974 -42.08804 1S   234    0.00000
 3421  216 LYS  HB2   -9.68593  20.19093 -40.83589 1S   234    0.00000
 3422  216 LYS  CG   -11.82891  20.33263 -41.09255 1S   234    1.00000
 3423  216 LYS  HG1  -12.04688  20.71705 -40.07296 1S   234    0.00000
 3424  216 LYS  HG2  -12.67302  19.67517 -41.40033 1S   234    0.00000
 3425  216 LYS  CD   -11.72628  21.51243 -42.06416 1S   234    1.00000
 3426  216 LYS  HD1  -11.64717  21.11750 -43.10209 1S   234    0.00000
 3427  216 LYS  HD2  -10.79428  22.07959 -41.83928 1S   234    0.00000
 3428  216 LYS  CE   -12.92972  22.44619 -41.94404 1S   234    1.00000
 3429  216 LYS  HE1  -12.98294  22.87171 -40.91835 1S   234    0.00000
 3430  216 LYS  HE2  -13.86787  21.89466 -42.16471 1S   234    0.00000
 3431  216 LYS  NZ   -12.83010  23.56805 -42.89667 1S   234    1.00000
 3432  216 LYS  HZ1  -12.63862  23.21566 -43.85464 1S   234    0.00000
 3433  216 LYS  HZ2  -12.05431  24.20401 -42.59408 1S   234    0.00000
 3434  216 LYS  HZ3  -13.71504  24.11277 -42.88853 1S   234    0.00000
 3435  216 LYS  C     -9.60543  17.30513 -40.48581 1S   234    1.00000
 3436  216 LYS  O    -10.10933  16.38384 -41.11723 1S   234    1.00000
 3437  217 PRO  N     -8.28930  17.28141 -40.25817 1S   235    1.00000
 3438  217 PRO  CD    -7.49678  18.38568 -39.71777 1S   235    1.00000
 3439  217 PRO  HD1   -7.37740  18.21245 -38.62751 1S   235    0.00000
 3440  217 PRO  HD2   -7.95956  19.37678 -39.89780 1S   235    0.00000
 3441  217 PRO  CA    -7.43637  16.25580 -40.84008 1S   235    1.00000
 3442  217 PRO  HA    -7.65332  16.20159 -41.89872 1S   235    0.00000
 3443  217 PRO  CB    -6.00507  16.74304 -40.57533 1S   235    1.00000
 3444  217 PRO  HB1   -5.32017  16.47232 -41.40424 1S   235    0.00000
 3445  217 PRO  HB2   -5.61153  16.33523 -39.61869 1S   235    0.00000
 3446  217 PRO  CG    -6.15421  18.25973 -40.42708 1S   235    1.00000
 3447  217 PRO  HG1   -5.32487  18.72028 -39.85527 1S   235    0.00000
 3448  217 PRO  HG2   -6.22659  18.73063 -41.43225 1S   235    0.00000
 3449  217 PRO  C     -7.69099  14.89634 -40.23043 1S   235    1.00000
 3450  217 PRO  O     -7.68476  13.91349 -40.96640 1S   235    1.00000
 3451  218 LEU  N     -7.96725  14.81705 -38.90520 1S   236    1.00000
 3452  218 LEU  HN    -7.93307  15.62876 -38.32717 1S   236    0.00000
 3453  218 LEU  CA    -8.36585  13.59229 -38.23870 1S   236    1.00000
 3454  218 LEU  HA    -7.60237  12.85271 -38.42864 1S   236    0.00000
 3455  218 LEU  CB    -8.51973  13.79119 -36.70830 1S   236    1.00000
 3456  218 LEU  HB1   -9.23550  14.62096 -36.51883 1S   236    0.00000
 3457  218 LEU  HB2   -7.53291  14.11191 -36.30741 1S   236    0.00000
 3458  218 LEU  CG    -8.98727  12.55319 -35.89793 1S   236    1.00000
 3459  218 LEU  HG   -10.04102  12.33397 -36.18692 1S   236    0.00000
 3460  218 LEU  CD1   -8.16363  11.28322 -36.19024 1S   236    1.00000
 3461  218 LEU  HD11  -7.08099  11.48963 -36.06607 1S   236    0.00000
 3462  218 LEU  HD12  -8.34201  10.92543 -37.22540 1S   236    0.00000
 3463  218 LEU  HD13  -8.45298  10.46871 -35.49287 1S   236    0.00000
 3464  218 LEU  CD2   -8.99296  12.86088 -34.38826 1S   236    1.00000
 3465  218 LEU  HD21  -9.64874  13.72908 -34.16788 1S   236    0.00000
 3466  218 LEU  HD22  -7.96454  13.09143 -34.03802 1S   236    0.00000
 3467  218 LEU  HD23  -9.37013  11.98294 -33.82319 1S   236    0.00000
 3468  218 LEU  C     -9.66366  13.08328 -38.81508 1S   236    1.00000
 3469  218 LEU  O     -9.79573  11.89717 -39.10996 1S   236    1.00000
 3470  219 TYR  N    -10.64024  13.99239 -39.03124 1S   237    1.00000
 3471  219 TYR  HN   -10.50105  14.95724 -38.81381 1S   237    0.00000
 3472  219 TYR  CA   -11.93774  13.64683 -39.55394 1S   237    1.00000
 3473  219 TYR  HA   -12.29665  12.81524 -38.96213 1S   237    0.00000
 3474  219 TYR  CB   -12.94429  14.81697 -39.41896 1S   237    1.00000
 3475  219 TYR  HB1  -12.58687  15.70694 -39.97981 1S   237    0.00000
 3476  219 TYR  HB2  -13.05705  15.09389 -38.34865 1S   237    0.00000
 3477  219 TYR  CG   -14.29840  14.40536 -39.93572 1S   237    1.00000
 3478  219 TYR  CD1  -15.00243  13.35284 -39.32309 1S   237    1.00000
 3479  219 TYR  HD1  -14.60189  12.86965 -38.44532 1S   237    0.00000
 3480  219 TYR  CE1  -16.22919  12.92532 -39.84007 1S   237    1.00000
 3481  219 TYR  HE1  -16.77819  12.13764 -39.34439 1S   237    0.00000
 3482  219 TYR  CZ   -16.76264  13.55134 -40.97073 1S   237    1.00000
 3483  219 TYR  OH   -18.03942  13.16345 -41.40480 1S   237    1.00000
 3484  219 TYR  HH   -18.26353  13.68943 -42.18174 1S   237    0.00000
 3485  219 TYR  CD2  -14.82511  15.00144 -41.09460 1S   237    1.00000
 3486  219 TYR  HD2  -14.27584  15.79101 -41.58598 1S   237    0.00000
 3487  219 TYR  CE2  -16.05610  14.57963 -41.61297 1S   237    1.00000
 3488  219 TYR  HE2  -16.46335  15.06953 -42.48496 1S   237    0.00000
 3489  219 TYR  C    -11.86489  13.18093 -40.99433 1S   237    1.00000
 3490  219 TYR  O    -12.50856  12.19669 -41.33743 1S   237    1.00000
 3491  220 GLU  N    -11.08768  13.85940 -41.86743 1S   238    1.00000
 3492  220 GLU  HN   -10.59386  14.68093 -41.58190 1S   238    0.00000
 3493  220 GLU  CA   -10.93283  13.50100 -43.26253 1S   238    1.00000
 3494  220 GLU  HA   -11.91241  13.50424 -43.71713 1S   238    0.00000
 3495  220 GLU  CB   -10.01749  14.48062 -44.02869 1S   238    1.00000
 3496  220 GLU  HB1   -9.72175  14.02064 -45.00024 1S   238    0.00000
 3497  220 GLU  HB2   -9.09160  14.66068 -43.43899 1S   238    0.00000
 3498  220 GLU  CG   -10.70741  15.81913 -44.34813 1S   238    1.00000
 3499  220 GLU  HG1  -10.98661  16.35028 -43.41595 1S   238    0.00000
 3500  220 GLU  HG2  -11.63282  15.62657 -44.93086 1S   238    0.00000
 3501  220 GLU  CD    -9.78514  16.70604 -45.18270 1S   238    1.00000
 3502  220 GLU  OE1   -9.12345  16.17131 -46.11229 1S   238    1.00000
 3503  220 GLU  OE2   -9.74299  17.93444 -44.90658 1S   238    1.00000
 3504  220 GLU  C    -10.35519  12.11963 -43.42435 1S   238    1.00000
 3505  220 GLU  O    -10.77716  11.36601 -44.29726 1S   238    1.00000
 3506  221 HSD  N     -9.38933  11.75017 -42.55777 1S   239    1.00000
 3507  221 HSD  HN    -9.05706  12.38513 -41.86244 1S   239    0.00000
 3508  221 HSD  CA    -8.77206  10.44836 -42.57027 1S   239    1.00000
 3509  221 HSD  HA    -8.58235  10.18684 -43.60251 1S   239    0.00000
 3510  221 HSD  CB    -7.42050  10.46411 -41.82533 1S   239    1.00000
 3511  221 HSD  HB1   -7.13612   9.44065 -41.51012 1S   239    0.00000
 3512  221 HSD  HB2   -7.50224  11.09510 -40.91384 1S   239    0.00000
 3513  221 HSD  ND1   -5.70099  10.18707 -43.66910 1S   239    1.00000
 3514  221 HSD  HD1   -5.81536   9.19985 -43.77954 1S   239    0.00000
 3515  221 HSD  CG    -6.31675  10.97365 -42.71855 1S   239    1.00000
 3516  221 HSD  CE1   -4.82721  10.97792 -44.33601 1S   239    1.00000
 3517  221 HSD  HE1   -4.19310  10.60954 -45.14109 1S   239    0.00000
 3518  221 HSD  NE2   -4.83227  12.21356 -43.88211 1S   239    1.00000
 3519  221 HSD  CD2   -5.76970  12.21176 -42.86487 1S   239    1.00000
 3520  221 HSD  HD2   -5.95246  13.13322 -42.33508 1S   239    0.00000
 3521  221 HSD  C     -9.69709   9.38329 -42.01901 1S   239    1.00000
 3522  221 HSD  O     -9.75013   8.27943 -42.55545 1S   239    1.00000
 3523  222 LEU  N    -10.49590   9.68641 -40.96797 1S   240    1.00000
 3524  222 LEU  HN   -10.42504  10.56734 -40.50207 1S   240    0.00000
 3525  222 LEU  CA   -11.51204   8.78418 -40.45230 1S   240    1.00000
 3526  222 LEU  HA   -11.02506   7.85040 -40.20786 1S   240    0.00000
 3527  222 LEU  CB   -12.20375   9.35472 -39.18690 1S   240    1.00000
 3528  222 LEU  HB1  -12.65350  10.33970 -39.43775 1S   240    0.00000
 3529  222 LEU  HB2  -11.42316   9.53828 -38.41584 1S   240    0.00000
 3530  222 LEU  CG   -13.30128   8.45571 -38.56098 1S   240    1.00000
 3531  222 LEU  HG   -14.02902   8.18202 -39.35950 1S   240    0.00000
 3532  222 LEU  CD1  -12.72697   7.14605 -37.99019 1S   240    1.00000
 3533  222 LEU  HD11 -11.98367   7.36496 -37.19475 1S   240    0.00000
 3534  222 LEU  HD12 -12.23291   6.55008 -38.78574 1S   240    0.00000
 3535  222 LEU  HD13 -13.54023   6.53111 -37.55092 1S   240    0.00000
 3536  222 LEU  CD2  -14.10586   9.21813 -37.49091 1S   240    1.00000
 3537  222 LEU  HD21 -14.56992  10.12610 -37.93149 1S   240    0.00000
 3538  222 LEU  HD22 -13.44340   9.52554 -36.65522 1S   240    0.00000
 3539  222 LEU  HD23 -14.91347   8.57250 -37.08476 1S   240    0.00000
 3540  222 LEU  C    -12.55845   8.50739 -41.50923 1S   240    1.00000
 3541  222 LEU  O    -12.90371   7.35677 -41.75986 1S   240    1.00000
 3542  223 HSE  N    -13.04107   9.57330 -42.18610 1S   241    1.00000
 3543  223 HSE  HN   -12.73386  10.49235 -41.93805 1S   241    0.00000
 3544  223 HSE  CA   -13.99549   9.53887 -43.27083 1S   241    1.00000
 3545  223 HSE  HA   -14.90177   9.08927 -42.89158 1S   241    0.00000
 3546  223 HSE  CB   -14.31075  10.97657 -43.76682 1S   241    1.00000
 3547  223 HSE  HB1  -13.37548  11.47336 -44.09958 1S   241    0.00000
 3548  223 HSE  HB2  -14.69918  11.55657 -42.90065 1S   241    0.00000
 3549  223 HSE  ND1  -15.01195  10.74083 -46.17248 1S   241    1.00000
 3550  223 HSE  CG   -15.33228  11.09290 -44.86965 1S   241    1.00000
 3551  223 HSE  CE1  -16.10623  10.97699 -46.86497 1S   241    1.00000
 3552  223 HSE  HE1  -16.21751  10.80624 -47.93503 1S   241    0.00000
 3553  223 HSE  NE2  -17.10072  11.46687 -46.08880 1S   241    1.00000
 3554  223 HSE  HE2  -18.02189  11.74339 -46.37822 1S   241    0.00000
 3555  223 HSE  CD2  -16.61127  11.54561 -44.80620 1S   241    1.00000
 3556  223 HSE  HD2  -17.18241  11.91800 -43.96746 1S   241    0.00000
 3557  223 HSE  C    -13.50157   8.69372 -44.41999 1S   241    1.00000
 3558  223 HSE  O    -14.24463   7.85911 -44.92678 1S   241    1.00000
 3559  224 ALA  N    -12.23040   8.87691 -44.84852 1S   242    1.00000
 3560  224 ALA  HN   -11.63891   9.56087 -44.42370 1S   242    0.00000
 3561  224 ALA  CA   -11.65810   8.17684 -45.97785 1S   242    1.00000
 3562  224 ALA  HA   -12.34216   8.28869 -46.80797 1S   242    0.00000
 3563  224 ALA  CB   -10.29499   8.76158 -46.38680 1S   242    1.00000
 3564  224 ALA  HB1   -9.57096   8.70581 -45.54780 1S   242    0.00000
 3565  224 ALA  HB2  -10.41775   9.82933 -46.66669 1S   242    0.00000
 3566  224 ALA  HB3   -9.87506   8.21941 -47.26131 1S   242    0.00000
 3567  224 ALA  C    -11.49355   6.70029 -45.70907 1S   242    1.00000
 3568  224 ALA  O    -11.74504   5.88103 -46.59090 1S   242    1.00000
 3569  225 TYR  N    -11.10867   6.32355 -44.46558 1S   243    1.00000
 3570  225 TYR  HN   -10.88798   7.00447 -43.76905 1S   243    0.00000
 3571  225 TYR  CA   -11.00909   4.94402 -44.03805 1S   243    1.00000
 3572  225 TYR  HA   -10.38729   4.42209 -44.75314 1S   243    0.00000
 3573  225 TYR  CB   -10.36041   4.83765 -42.63078 1S   243    1.00000
 3574  225 TYR  HB1  -10.90036   5.49098 -41.91204 1S   243    0.00000
 3575  225 TYR  HB2   -9.30640   5.18536 -42.69021 1S   243    0.00000
 3576  225 TYR  CG   -10.34645   3.42846 -42.08936 1S   243    1.00000
 3577  225 TYR  CD1   -9.51873   2.44716 -42.65867 1S   243    1.00000
 3578  225 TYR  HD1   -8.85513   2.70664 -43.47056 1S   243    0.00000
 3579  225 TYR  CE1   -9.56140   1.12760 -42.19428 1S   243    1.00000
 3580  225 TYR  HE1   -8.92473   0.37910 -42.64396 1S   243    0.00000
 3581  225 TYR  CZ   -10.43568   0.77827 -41.15788 1S   243    1.00000
 3582  225 TYR  OH   -10.48386  -0.55973 -40.71819 1S   243    1.00000
 3583  225 TYR  HH   -11.20025  -0.63430 -40.07733 1S   243    0.00000
 3584  225 TYR  CD2  -11.21751   3.06869 -41.04628 1S   243    1.00000
 3585  225 TYR  HD2  -11.87334   3.81044 -40.61380 1S   243    0.00000
 3586  225 TYR  CE2  -11.26204   1.75124 -40.57938 1S   243    1.00000
 3587  225 TYR  HE2  -11.93966   1.49861 -39.77829 1S   243    0.00000
 3588  225 TYR  C    -12.37576   4.29304 -44.04247 1S   243    1.00000
 3589  225 TYR  O    -12.53591   3.20778 -44.59281 1S   243    1.00000
 3590  226 VAL  N    -13.39145   4.95588 -43.44188 1S   244    1.00000
 3591  226 VAL  HN   -13.23410   5.84822 -43.02016 1S   244    0.00000
 3592  226 VAL  CA   -14.74553   4.45271 -43.32367 1S   244    1.00000
 3593  226 VAL  HA   -14.68765   3.47340 -42.86875 1S   244    0.00000
 3594  226 VAL  CB   -15.59928   5.34991 -42.43055 1S   244    1.00000
 3595  226 VAL  HB   -15.42125   6.41610 -42.69937 1S   244    0.00000
 3596  226 VAL  CG1  -17.10928   5.06425 -42.57897 1S   244    1.00000
 3597  226 VAL  HG11 -17.31535   3.98057 -42.45211 1S   244    0.00000
 3598  226 VAL  HG12 -17.48228   5.38903 -43.57307 1S   244    0.00000
 3599  226 VAL  HG13 -17.67552   5.62506 -41.80569 1S   244    0.00000
 3600  226 VAL  CG2  -15.15011   5.12561 -40.97045 1S   244    1.00000
 3601  226 VAL  HG21 -14.07292   5.35228 -40.83890 1S   244    0.00000
 3602  226 VAL  HG22 -15.32273   4.06979 -40.67319 1S   244    0.00000
 3603  226 VAL  HG23 -15.73168   5.78057 -40.28845 1S   244    0.00000
 3604  226 VAL  C    -15.36287   4.26484 -44.68932 1S   244    1.00000
 3605  226 VAL  O    -15.99822   3.24593 -44.94033 1S   244    1.00000
 3606  227 ARG  N    -15.14031   5.21528 -45.62409 1S   245    1.00000
 3607  227 ARG  HN   -14.63060   6.04457 -45.39553 1S   245    0.00000
 3608  227 ARG  CA   -15.60413   5.13574 -46.99023 1S   245    1.00000
 3609  227 ARG  HA   -16.67708   5.01352 -46.96572 1S   245    0.00000
 3610  227 ARG  CB   -15.25136   6.40996 -47.78281 1S   245    1.00000
 3611  227 ARG  HB1  -14.15622   6.58535 -47.70481 1S   245    0.00000
 3612  227 ARG  HB2  -15.75757   7.27504 -47.29889 1S   245    0.00000
 3613  227 ARG  CG   -15.66668   6.36896 -49.26686 1S   245    1.00000
 3614  227 ARG  HG1  -16.74158   6.08842 -49.33245 1S   245    0.00000
 3615  227 ARG  HG2  -15.07992   5.59005 -49.80276 1S   245    0.00000
 3616  227 ARG  CD   -15.47207   7.70262 -49.98398 1S   245    1.00000
 3617  227 ARG  HD1  -16.14944   8.46403 -49.54056 1S   245    0.00000
 3618  227 ARG  HD2  -15.66312   7.60927 -51.07203 1S   245    0.00000
 3619  227 ARG  NE   -14.04994   8.11973 -49.79192 1S   245    1.00000
 3620  227 ARG  HE   -13.38702   7.44953 -49.47293 1S   245    0.00000
 3621  227 ARG  CZ   -13.64898   9.40739 -49.95402 1S   245    1.00000
 3622  227 ARG  NH1  -12.36156   9.74529 -49.69306 1S   245    1.00000
 3623  227 ARG  HH11 -11.68418   9.05521 -49.45399 1S   245    0.00000
 3624  227 ARG  HH12 -12.09036  10.70533 -49.81002 1S   245    0.00000
 3625  227 ARG  NH2  -14.51216  10.37127 -50.37161 1S   245    1.00000
 3626  227 ARG  HH21 -15.46861  10.13855 -50.56542 1S   245    0.00000
 3627  227 ARG  HH22 -14.18092  11.30304 -50.48542 1S   245    0.00000
 3628  227 ARG  C    -15.03341   3.95532 -47.72397 1S   245    1.00000
 3629  227 ARG  O    -15.76217   3.27709 -48.43878 1S   245    1.00000
 3630  228 ALA  N    -13.72424   3.66508 -47.55166 1S   246    1.00000
 3631  228 ALA  HN   -13.14224   4.22922 -46.96817 1S   246    0.00000
 3632  228 ALA  CA   -13.07010   2.54722 -48.19450 1S   246    1.00000
 3633  228 ALA  HA   -13.26968   2.61474 -49.25536 1S   246    0.00000
 3634  228 ALA  CB   -11.54730   2.57770 -47.97239 1S   246    1.00000
 3635  228 ALA  HB1  -11.30254   2.54764 -46.88957 1S   246    0.00000
 3636  228 ALA  HB2  -11.12545   3.51357 -48.39764 1S   246    0.00000
 3637  228 ALA  HB3  -11.05722   1.71684 -48.47564 1S   246    0.00000
 3638  228 ALA  C    -13.61336   1.22549 -47.70001 1S   246    1.00000
 3639  228 ALA  O    -13.84890   0.31306 -48.48976 1S   246    1.00000
 3640  229 LYS  N    -13.86807   1.11003 -46.37551 1S   247    1.00000
 3641  229 LYS  HN   -13.66076   1.85927 -45.74762 1S   247    0.00000
 3642  229 LYS  CA   -14.43687  -0.07415 -45.76970 1S   247    1.00000
 3643  229 LYS  HA   -13.85392  -0.92342 -46.09385 1S   247    0.00000
 3644  229 LYS  CB   -14.42933   0.00568 -44.22737 1S   247    1.00000
 3645  229 LYS  HB1  -14.98705  -0.85721 -43.80200 1S   247    0.00000
 3646  229 LYS  HB2  -14.96035   0.93432 -43.92052 1S   247    0.00000
 3647  229 LYS  CG   -13.02427   0.03425 -43.59921 1S   247    1.00000
 3648  229 LYS  HG1  -13.12845   0.16290 -42.49893 1S   247    0.00000
 3649  229 LYS  HG2  -12.47175   0.91699 -43.98026 1S   247    0.00000
 3650  229 LYS  CD   -12.16359  -1.21269 -43.86482 1S   247    1.00000
 3651  229 LYS  HD1  -11.14293  -1.00415 -43.47135 1S   247    0.00000
 3652  229 LYS  HD2  -12.06816  -1.37611 -44.95970 1S   247    0.00000
 3653  229 LYS  CE   -12.70670  -2.47535 -43.18680 1S   247    1.00000
 3654  229 LYS  HE1  -13.68371  -2.77047 -43.62422 1S   247    0.00000
 3655  229 LYS  HE2  -12.82889  -2.30255 -42.09637 1S   247    0.00000
 3656  229 LYS  NZ   -11.77319  -3.61043 -43.35574 1S   247    1.00000
 3657  229 LYS  HZ1  -10.85594  -3.36762 -42.92909 1S   247    0.00000
 3658  229 LYS  HZ2  -11.64427  -3.80857 -44.36817 1S   247    0.00000
 3659  229 LYS  HZ3  -12.16262  -4.45088 -42.88255 1S   247    0.00000
 3660  229 LYS  C    -15.85612  -0.30914 -46.22792 1S   247    1.00000
 3661  229 LYS  O    -16.22225  -1.43573 -46.55799 1S   247    1.00000
 3662  230 LEU  N    -16.68377   0.75908 -46.29392 1S   248    1.00000
 3663  230 LEU  HN   -16.38280   1.66883 -46.00879 1S   248    0.00000
 3664  230 LEU  CA   -18.04922   0.66535 -46.75569 1S   248    1.00000
 3665  230 LEU  HA   -18.50892  -0.17981 -46.26440 1S   248    0.00000
 3666  230 LEU  CB   -18.88207   1.93531 -46.47074 1S   248    1.00000
 3667  230 LEU  HB1  -19.87367   1.83118 -46.96635 1S   248    0.00000
 3668  230 LEU  HB2  -18.36614   2.81510 -46.91650 1S   248    0.00000
 3669  230 LEU  CG   -19.17591   2.23218 -44.98406 1S   248    1.00000
 3670  230 LEU  HG   -18.20929   2.39301 -44.45825 1S   248    0.00000
 3671  230 LEU  CD1  -19.99092   3.53412 -44.87084 1S   248    1.00000
 3672  230 LEU  HD11 -20.95604   3.43242 -45.41205 1S   248    0.00000
 3673  230 LEU  HD12 -19.42251   4.37664 -45.31547 1S   248    0.00000
 3674  230 LEU  HD13 -20.20423   3.77195 -43.80828 1S   248    0.00000
 3675  230 LEU  CD2  -19.89602   1.07070 -44.27370 1S   248    1.00000
 3676  230 LEU  HD21 -19.26321   0.15902 -44.26389 1S   248    0.00000
 3677  230 LEU  HD22 -20.85216   0.83788 -44.78828 1S   248    0.00000
 3678  230 LEU  HD23 -20.11623   1.34746 -43.22117 1S   248    0.00000
 3679  230 LEU  C    -18.12425   0.40141 -48.23843 1S   248    1.00000
 3680  230 LEU  O    -19.06251  -0.24386 -48.68846 1S   248    1.00000
 3681  231 MET  N    -17.13824   0.86458 -49.03980 1S   249    1.00000
 3682  231 MET  HN   -16.39155   1.41843 -48.67364 1S   249    0.00000
 3683  231 MET  CA   -17.10829   0.64604 -50.46947 1S   249    1.00000
 3684  231 MET  HA   -18.07678   0.92474 -50.86208 1S   249    0.00000
 3685  231 MET  CB   -16.03150   1.49873 -51.17388 1S   249    1.00000
 3686  231 MET  HB1  -15.02334   1.15439 -50.85922 1S   249    0.00000
 3687  231 MET  HB2  -16.14509   2.55228 -50.83502 1S   249    0.00000
 3688  231 MET  CG   -16.15210   1.48863 -52.70900 1S   249    1.00000
 3689  231 MET  HG1  -17.19148   1.79156 -52.96737 1S   249    0.00000
 3690  231 MET  HG2  -16.01390   0.45077 -53.08064 1S   249    0.00000
 3691  231 MET  SD   -14.98813   2.59007 -53.56138 1S   249    1.00000
 3692  231 MET  CE   -13.44268   1.79891 -53.02249 1S   249    1.00000
 3693  231 MET  HE1  -13.47318   0.70184 -53.19700 1S   249    0.00000
 3694  231 MET  HE2  -13.25707   1.97090 -51.94069 1S   249    0.00000
 3695  231 MET  HE3  -12.57422   2.20963 -53.58049 1S   249    0.00000
 3696  231 MET  C    -16.86797  -0.80907 -50.78788 1S   249    1.00000
 3697  231 MET  O    -17.44112  -1.34268 -51.73089 1S   249    1.00000
 3698  232 ASN  N    -16.04885  -1.51324 -49.97340 1S   250    1.00000
 3699  232 ASN  HN   -15.55884  -1.06830 -49.22625 1S   250    0.00000
 3700  232 ASN  CA   -15.82497  -2.93898 -50.12090 1S   250    1.00000
 3701  232 ASN  HA   -15.51062  -3.12266 -51.14004 1S   250    0.00000
 3702  232 ASN  CB   -14.75115  -3.46929 -49.13499 1S   250    1.00000
 3703  232 ASN  HB1  -14.71900  -4.58041 -49.16358 1S   250    0.00000
 3704  232 ASN  HB2  -14.99925  -3.14677 -48.10213 1S   250    0.00000
 3705  232 ASN  CG   -13.35811  -2.95276 -49.51859 1S   250    1.00000
 3706  232 ASN  OD1  -13.12238  -2.47617 -50.63302 1S   250    1.00000
 3707  232 ASN  ND2  -12.39585  -3.08105 -48.55627 1S   250    1.00000
 3708  232 ASN  HD21 -11.46509  -2.78479 -48.75565 1S   250    0.00000
 3709  232 ASN  HD22 -12.62718  -3.48485 -47.67145 1S   250    0.00000
 3710  232 ASN  C    -17.10000  -3.73333 -49.90007 1S   250    1.00000
 3711  232 ASN  O    -17.31370  -4.75233 -50.55402 1S   250    1.00000
 3712  233 ALA  N    -17.98481  -3.26741 -48.98665 1S   251    1.00000
 3713  233 ALA  HN   -17.80393  -2.42670 -48.48136 1S   251    0.00000
 3714  233 ALA  CA   -19.22077  -3.94161 -48.65613 1S   251    1.00000
 3715  233 ALA  HA   -19.07088  -5.00764 -48.76111 1S   251    0.00000
 3716  233 ALA  CB   -19.63975  -3.65470 -47.20273 1S   251    1.00000
 3717  233 ALA  HB1  -19.78196  -2.56590 -47.03707 1S   251    0.00000
 3718  233 ALA  HB2  -18.84834  -4.01334 -46.50999 1S   251    0.00000
 3719  233 ALA  HB3  -20.58406  -4.18377 -46.95099 1S   251    0.00000
 3720  233 ALA  C    -20.35917  -3.54633 -49.57130 1S   251    1.00000
 3721  233 ALA  O    -21.26466  -4.34520 -49.80412 1S   251    1.00000
 3722  234 TYR  N    -20.34701  -2.30699 -50.11285 1S   252    1.00000
 3723  234 TYR  HN   -19.61344  -1.66117 -49.90609 1S   252    0.00000
 3724  234 TYR  CA   -21.38844  -1.81141 -50.98871 1S   252    1.00000
 3725  234 TYR  HA   -22.05371  -2.60999 -51.28770 1S   252    0.00000
 3726  234 TYR  CB   -22.20986  -0.68451 -50.31176 1S   252    1.00000
 3727  234 TYR  HB1  -22.97562  -0.28715 -51.00134 1S   252    0.00000
 3728  234 TYR  HB2  -21.54358   0.14522 -50.00382 1S   252    0.00000
 3729  234 TYR  CG   -22.92282  -1.17911 -49.09020 1S   252    1.00000
 3730  234 TYR  CD1  -24.12939  -1.89167 -49.20011 1S   252    1.00000
 3731  234 TYR  HD1  -24.54832  -2.09462 -50.17432 1S   252    0.00000
 3732  234 TYR  CE1  -24.79344  -2.34278 -48.05223 1S   252    1.00000
 3733  234 TYR  HE1  -25.71991  -2.88953 -48.15104 1S   252    0.00000
 3734  234 TYR  CZ   -24.24470  -2.08455 -46.78714 1S   252    1.00000
 3735  234 TYR  OH   -24.87313  -2.52754 -45.61197 1S   252    1.00000
 3736  234 TYR  HH   -25.67263  -3.00238 -45.86778 1S   252    0.00000
 3737  234 TYR  CD2  -22.39463  -0.91908 -47.81476 1S   252    1.00000
 3738  234 TYR  HD2  -21.47182  -0.36805 -47.71535 1S   252    0.00000
 3739  234 TYR  CE2  -23.04825  -1.37458 -46.66849 1S   252    1.00000
 3740  234 TYR  HE2  -22.62649  -1.17634 -45.69373 1S   252    0.00000
 3741  234 TYR  C    -20.75510  -1.22647 -52.23712 1S   252    1.00000
 3742  234 TYR  O    -20.79190  -0.00538 -52.40047 1S   252    1.00000
 3743  235 PRO  N    -20.17689  -2.00597 -53.15914 1S   253    1.00000
 3744  235 PRO  CD   -19.99030  -3.44950 -53.01448 1S   253    1.00000
 3745  235 PRO  HD1  -20.93721  -3.95961 -52.73799 1S   253    0.00000
 3746  235 PRO  HD2  -19.21208  -3.62630 -52.23907 1S   253    0.00000
 3747  235 PRO  CA   -19.33304  -1.46661 -54.22001 1S   253    1.00000
 3748  235 PRO  HA   -18.61978  -0.78287 -53.78377 1S   253    0.00000
 3749  235 PRO  CB   -18.65385  -2.70102 -54.84980 1S   253    1.00000
 3750  235 PRO  HB1  -17.62057  -2.78370 -54.44637 1S   253    0.00000
 3751  235 PRO  HB2  -18.60035  -2.66282 -55.95687 1S   253    0.00000
 3752  235 PRO  CG   -19.47144  -3.90715 -54.37097 1S   253    1.00000
 3753  235 PRO  HG1  -20.33032  -4.07753 -55.05575 1S   253    0.00000
 3754  235 PRO  HG2  -18.86094  -4.82988 -54.30010 1S   253    0.00000
 3755  235 PRO  C    -20.10347  -0.69652 -55.25764 1S   253    1.00000
 3756  235 PRO  O    -19.49813   0.13892 -55.92612 1S   253    1.00000
 3757  236 SER  N    -21.41926  -0.95327 -55.41860 1S   254    1.00000
 3758  236 SER  HN   -21.88843  -1.64176 -54.87087 1S   254    0.00000
 3759  236 SER  CA   -22.20309  -0.31161 -56.44849 1S   254    1.00000
 3760  236 SER  HA   -21.54114   0.00739 -57.24201 1S   254    0.00000
 3761  236 SER  CB   -23.22624  -1.28763 -57.09046 1S   254    1.00000
 3762  236 SER  HB1  -22.69222  -2.21999 -57.37693 1S   254    0.00000
 3763  236 SER  HB2  -23.65246  -0.83946 -58.01361 1S   254    0.00000
 3764  236 SER  OG   -24.28888  -1.64057 -56.20869 1S   254    1.00000
 3765  236 SER  HG1  -24.89908  -0.89719 -56.22289 1S   254    0.00000
 3766  236 SER  C    -22.91185   0.91929 -55.92780 1S   254    1.00000
 3767  236 SER  O    -23.62013   1.57846 -56.68564 1S   254    1.00000
 3768  237 TYR  N    -22.75907   1.24709 -54.62287 1S   255    1.00000
 3769  237 TYR  HN   -22.16353   0.71907 -54.02018 1S   255    0.00000
 3770  237 TYR  CA   -23.51907   2.30914 -53.99954 1S   255    1.00000
 3771  237 TYR  HA   -24.21073   2.74398 -54.70764 1S   255    0.00000
 3772  237 TYR  CB   -24.31381   1.80114 -52.77268 1S   255    1.00000
 3773  237 TYR  HB1  -24.79226   2.65045 -52.24085 1S   255    0.00000
 3774  237 TYR  HB2  -23.63434   1.28690 -52.06499 1S   255    0.00000
 3775  237 TYR  CG   -25.42594   0.86290 -53.17624 1S   255    1.00000
 3776  237 TYR  CD1  -26.50782   1.33391 -53.94231 1S   255    1.00000
 3777  237 TYR  HD1  -26.52259   2.36102 -54.27642 1S   255    0.00000
 3778  237 TYR  CE1  -27.59595   0.50112 -54.23493 1S   255    1.00000
 3779  237 TYR  HE1  -28.42806   0.89000 -54.80336 1S   255    0.00000
 3780  237 TYR  CZ   -27.61295  -0.81826 -53.76456 1S   255    1.00000
 3781  237 TYR  OH   -28.72341  -1.65143 -54.01795 1S   255    1.00000
 3782  237 TYR  HH   -29.38431  -1.13107 -54.47985 1S   255    0.00000
 3783  237 TYR  CD2  -25.44883  -0.47027 -52.73051 1S   255    1.00000
 3784  237 TYR  HD2  -24.63556  -0.85577 -52.14009 1S   255    0.00000
 3785  237 TYR  CE2  -26.53369  -1.30622 -53.01939 1S   255    1.00000
 3786  237 TYR  HE2  -26.54244  -2.32144 -52.64959 1S   255    0.00000
 3787  237 TYR  C    -22.63710   3.43712 -53.52374 1S   255    1.00000
 3788  237 TYR  O    -23.15894   4.48516 -53.14753 1S   255    1.00000
 3789  238 ILE  N    -21.29362   3.26174 -53.50113 1S   256    1.00000
 3790  238 ILE  HN   -20.86984   2.42780 -53.84669 1S   256    0.00000
 3791  238 ILE  CA   -20.38584   4.23322 -52.91958 1S   256    1.00000
 3792  238 ILE  HA   -20.90234   5.16556 -52.73447 1S   256    0.00000
 3793  238 ILE  CB   -19.80997   3.73119 -51.59497 1S   256    1.00000
 3794  238 ILE  HB   -19.57364   2.64802 -51.71331 1S   256    0.00000
 3795  238 ILE  CG2  -18.50754   4.45622 -51.17947 1S   256    1.00000
 3796  238 ILE  HG21 -18.65835   5.55583 -51.17092 1S   256    0.00000
 3797  238 ILE  HG22 -17.67579   4.21258 -51.87305 1S   256    0.00000
 3798  238 ILE  HG23 -18.19565   4.13655 -50.16303 1S   256    0.00000
 3799  238 ILE  CG1  -20.88686   3.87264 -50.49366 1S   256    1.00000
 3800  238 ILE  HG11 -21.89304   3.66787 -50.91606 1S   256    0.00000
 3801  238 ILE  HG12 -20.88786   4.92010 -50.12033 1S   256    0.00000
 3802  238 ILE  CD   -20.66468   2.91390 -49.33160 1S   256    1.00000
 3803  238 ILE  HD1  -19.73434   3.17980 -48.79040 1S   256    0.00000
 3804  238 ILE  HD2  -20.55863   1.87777 -49.71239 1S   256    0.00000
 3805  238 ILE  HD3  -21.51835   2.94822 -48.62176 1S   256    0.00000
 3806  238 ILE  C    -19.30395   4.52302 -53.92467 1S   256    1.00000
 3807  238 ILE  O    -18.65381   3.61760 -54.44425 1S   256    1.00000
 3808  239 SER  N    -19.08603   5.83364 -54.19907 1S   257    1.00000
 3809  239 SER  HN   -19.66344   6.53575 -53.79039 1S   257    0.00000
 3810  239 SER  CA   -18.01036   6.33589 -55.02604 1S   257    1.00000
 3811  239 SER  HA   -17.89513   5.65826 -55.85825 1S   257    0.00000
 3812  239 SER  CB   -18.35203   7.75955 -55.56365 1S   257    1.00000
 3813  239 SER  HB1  -18.83168   8.35454 -54.75815 1S   257    0.00000
 3814  239 SER  HB2  -19.07856   7.65002 -56.39534 1S   257    0.00000
 3815  239 SER  OG   -17.23385   8.49327 -56.05801 1S   257    1.00000
 3816  239 SER  HG1  -17.56709   9.35637 -56.31742 1S   257    0.00000
 3817  239 SER  C    -16.74214   6.38485 -54.18854 1S   257    1.00000
 3818  239 SER  O    -16.83208   6.67600 -52.99710 1S   257    1.00000
 3819  240 PRO  N    -15.54861   6.14712 -54.74500 1S   258    1.00000
 3820  240 PRO  CD   -15.35719   5.64176 -56.10740 1S   258    1.00000
 3821  240 PRO  HD1  -15.91156   6.25844 -56.84732 1S   258    0.00000
 3822  240 PRO  HD2  -15.70571   4.58652 -56.14566 1S   258    0.00000
 3823  240 PRO  CA   -14.29371   6.23213 -54.01005 1S   258    1.00000
 3824  240 PRO  HA   -14.39708   5.70668 -53.07065 1S   258    0.00000
 3825  240 PRO  CB   -13.25661   5.58976 -54.95238 1S   258    1.00000
 3826  240 PRO  HB1  -13.16457   4.51011 -54.70656 1S   258    0.00000
 3827  240 PRO  HB2  -12.24976   6.04936 -54.88586 1S   258    0.00000
 3828  240 PRO  CG   -13.85324   5.72307 -56.35745 1S   258    1.00000
 3829  240 PRO  HG1  -13.60165   6.72104 -56.77790 1S   258    0.00000
 3830  240 PRO  HG2  -13.49679   4.92970 -57.04474 1S   258    0.00000
 3831  240 PRO  C    -13.89662   7.66069 -53.71182 1S   258    1.00000
 3832  240 PRO  O    -12.96333   7.84576 -52.93256 1S   258    1.00000
 3833  241 ILE  N    -14.55764   8.67145 -54.32258 1S   259    1.00000
 3834  241 ILE  HN   -15.30276   8.48881 -54.96171 1S   259    0.00000
 3835  241 ILE  CA   -14.19221  10.06056 -54.15401 1S   259    1.00000
 3836  241 ILE  HA   -13.39317  10.14395 -53.43050 1S   259    0.00000
 3837  241 ILE  CB   -13.72577  10.71588 -55.45251 1S   259    1.00000
 3838  241 ILE  HB   -13.42465  11.76594 -55.22608 1S   259    0.00000
 3839  241 ILE  CG2  -12.46601   9.96991 -55.94575 1S   259    1.00000
 3840  241 ILE  HG21 -12.73338   8.95809 -56.31688 1S   259    0.00000
 3841  241 ILE  HG22 -11.73040   9.86062 -55.12231 1S   259    0.00000
 3842  241 ILE  HG23 -11.98500  10.52891 -56.77507 1S   259    0.00000
 3843  241 ILE  CG1  -14.82681  10.75516 -56.54257 1S   259    1.00000
 3844  241 ILE  HG11 -15.80074  11.05507 -56.10010 1S   259    0.00000
 3845  241 ILE  HG12 -14.95170   9.73498 -56.96625 1S   259    0.00000
 3846  241 ILE  CD   -14.52431  11.74406 -57.67011 1S   259    1.00000
 3847  241 ILE  HD1  -13.57995  11.47884 -58.18918 1S   259    0.00000
 3848  241 ILE  HD2  -14.42983  12.77295 -57.26027 1S   259    0.00000
 3849  241 ILE  HD3  -15.35034  11.73965 -58.41329 1S   259    0.00000
 3850  241 ILE  C    -15.35207  10.85242 -53.60748 1S   259    1.00000
 3851  241 ILE  O    -15.22246  12.05389 -53.39220 1S   259    1.00000
 3852  242 GLY  N    -16.52369  10.21677 -53.38090 1S   260    1.00000
 3853  242 GLY  HN   -16.60866   9.22824 -53.48334 1S   260    0.00000
 3854  242 GLY  CA   -17.74222  10.93654 -53.08763 1S   260    1.00000
 3855  242 GLY  HA1  -18.54629  10.38540 -53.55156 1S   260    0.00000
 3856  242 GLY  HA2  -17.67166  11.95421 -53.44897 1S   260    0.00000
 3857  242 GLY  C    -18.00780  10.97324 -51.62075 1S   260    1.00000
 3858  242 GLY  O    -17.29795  10.38338 -50.81034 1S   260    1.00000
 3859  243 CYS  N    -19.09547  11.67082 -51.24606 1S   261    1.00000
 3860  243 CYS  HN   -19.65113  12.16022 -51.91273 1S   261    0.00000
 3861  243 CYS  CA   -19.56847  11.73006 -49.88878 1S   261    1.00000
 3862  243 CYS  HA   -18.73209  11.89081 -49.22096 1S   261    0.00000
 3863  243 CYS  CB   -20.60427  12.86080 -49.72995 1S   261    1.00000
 3864  243 CYS  HB1  -21.08710  12.79272 -48.73508 1S   261    0.00000
 3865  243 CYS  HB2  -21.39315  12.70754 -50.49249 1S   261    0.00000
 3866  243 CYS  SG   -19.89112  14.51864 -49.94600 1S   261    1.00000
 3867  243 CYS  HG1  -19.50034  14.32348 -51.19710 1S   261    0.00000
 3868  243 CYS  C    -20.23218  10.41999 -49.53768 1S   261    1.00000
 3869  243 CYS  O    -20.58856   9.63138 -50.41119 1S   261    1.00000
 3870  244 LEU  N    -20.40584  10.15483 -48.22655 1S   262    1.00000
 3871  244 LEU  HN   -20.11026  10.79654 -47.52050 1S   262    0.00000
 3872  244 LEU  CA   -21.03130   8.94711 -47.75102 1S   262    1.00000
 3873  244 LEU  HA   -20.68194   8.12579 -48.35457 1S   262    0.00000
 3874  244 LEU  CB   -20.69316   8.66720 -46.27062 1S   262    1.00000
 3875  244 LEU  HB1  -21.29307   7.80511 -45.90124 1S   262    0.00000
 3876  244 LEU  HB2  -20.96450   9.55736 -45.66065 1S   262    0.00000
 3877  244 LEU  CG   -19.20300   8.34488 -46.03973 1S   262    1.00000
 3878  244 LEU  HG   -18.59140   9.14980 -46.50817 1S   262    0.00000
 3879  244 LEU  CD1  -18.85443   8.33603 -44.54029 1S   262    1.00000
 3880  244 LEU  HD11 -19.42912   7.54654 -44.01206 1S   262    0.00000
 3881  244 LEU  HD12 -19.09708   9.31968 -44.08534 1S   262    0.00000
 3882  244 LEU  HD13 -17.76967   8.14127 -44.39926 1S   262    0.00000
 3883  244 LEU  CD2  -18.81594   7.01530 -46.70570 1S   262    1.00000
 3884  244 LEU  HD21 -18.83450   7.09943 -47.81241 1S   262    0.00000
 3885  244 LEU  HD22 -19.51874   6.21337 -46.39918 1S   262    0.00000
 3886  244 LEU  HD23 -17.79409   6.73072 -46.38899 1S   262    0.00000
 3887  244 LEU  C    -22.52830   9.10804 -47.85661 1S   262    1.00000
 3888  244 LEU  O    -23.02501  10.16041 -47.46140 1S   262    1.00000
 3889  245 PRO  N    -23.30447   8.14251 -48.34998 1S   263    1.00000
 3890  245 PRO  CD   -22.81935   7.04849 -49.19177 1S   263    1.00000
 3891  245 PRO  HD1  -22.44994   6.23461 -48.53211 1S   263    0.00000
 3892  245 PRO  HD2  -22.01202   7.39025 -49.87653 1S   263    0.00000
 3893  245 PRO  CA   -24.75511   8.24100 -48.37709 1S   263    1.00000
 3894  245 PRO  HA   -25.02392   9.13888 -48.91470 1S   263    0.00000
 3895  245 PRO  CB   -25.21848   6.96804 -49.09875 1S   263    1.00000
 3896  245 PRO  HB1  -26.14515   7.14008 -49.68317 1S   263    0.00000
 3897  245 PRO  HB2  -25.38967   6.14025 -48.37683 1S   263    0.00000
 3898  245 PRO  CG   -24.03611   6.59415 -49.99869 1S   263    1.00000
 3899  245 PRO  HG1  -24.00601   5.51172 -50.23496 1S   263    0.00000
 3900  245 PRO  HG2  -24.08768   7.17789 -50.94276 1S   263    0.00000
 3901  245 PRO  C    -25.29969   8.31434 -46.96828 1S   263    1.00000
 3902  245 PRO  O    -24.84397   7.55576 -46.11393 1S   263    1.00000
 3903  246 ALA  N    -26.23900   9.25269 -46.70940 1S   264    1.00000
 3904  246 ALA  HN   -26.57873   9.83398 -47.44733 1S   264    0.00000
 3905  246 ALA  CA   -26.65979   9.65725 -45.38592 1S   264    1.00000
 3906  246 ALA  HA   -25.77171   9.93089 -44.83666 1S   264    0.00000
 3907  246 ALA  CB   -27.61266  10.86751 -45.44586 1S   264    1.00000
 3908  246 ALA  HB1  -28.56753  10.59757 -45.94429 1S   264    0.00000
 3909  246 ALA  HB2  -27.14386  11.69305 -46.02235 1S   264    0.00000
 3910  246 ALA  HB3  -27.83679  11.24321 -44.42447 1S   264    0.00000
 3911  246 ALA  C    -27.34663   8.56049 -44.62482 1S   264    1.00000
 3912  246 ALA  O    -27.30304   8.51969 -43.39677 1S   264    1.00000
 3913  247 HSE  N    -27.98238   7.62479 -45.35512 1S   265    1.00000
 3914  247 HSE  HN   -27.98487   7.65965 -46.35318 1S   265    0.00000
 3915  247 HSE  CA   -28.71472   6.53265 -44.77979 1S   265    1.00000
 3916  247 HSE  HA   -29.19170   6.88774 -43.87705 1S   265    0.00000
 3917  247 HSE  CB   -29.82901   6.04516 -45.73771 1S   265    1.00000
 3918  247 HSE  HB1  -30.45209   6.91767 -46.02985 1S   265    0.00000
 3919  247 HSE  HB2  -30.48951   5.32953 -45.20190 1S   265    0.00000
 3920  247 HSE  ND1  -28.61566   6.07795 -47.94084 1S   265    1.00000
 3921  247 HSE  CG   -29.35307   5.38135 -46.99939 1S   265    1.00000
 3922  247 HSE  CE1  -28.39931   5.20943 -48.90662 1S   265    1.00000
 3923  247 HSE  HE1  -27.84661   5.41521 -49.82245 1S   265    0.00000
 3924  247 HSE  NE2  -28.94932   4.00100 -48.63537 1S   265    1.00000
 3925  247 HSE  HE2  -28.91737   3.18102 -49.21089 1S   265    0.00000
 3926  247 HSE  CD2  -29.55854   4.10472 -47.41072 1S   265    1.00000
 3927  247 HSE  HD2  -30.07421   3.28989 -46.93068 1S   265    0.00000
 3928  247 HSE  C    -27.83606   5.36013 -44.40523 1S   265    1.00000
 3929  247 HSE  O    -28.36063   4.36960 -43.91120 1S   265    1.00000
 3930  248 LEU  N    -26.49594   5.42536 -44.61466 1S   266    1.00000
 3931  248 LEU  HN   -26.07467   6.24138 -45.00861 1S   266    0.00000
 3932  248 LEU  CA   -25.59208   4.31699 -44.35624 1S   266    1.00000
 3933  248 LEU  HA   -26.14758   3.44273 -44.05483 1S   266    0.00000
 3934  248 LEU  CB   -24.74127   3.97172 -45.60746 1S   266    1.00000
 3935  248 LEU  HB1  -24.01791   3.16203 -45.36058 1S   266    0.00000
 3936  248 LEU  HB2  -24.15764   4.86931 -45.91155 1S   266    0.00000
 3937  248 LEU  CG   -25.55217   3.48041 -46.82676 1S   266    1.00000
 3938  248 LEU  HG   -26.23000   4.30361 -47.15108 1S   266    0.00000
 3939  248 LEU  CD1  -24.60688   3.16747 -48.00184 1S   266    1.00000
 3940  248 LEU  HD11 -23.89067   2.36697 -47.72048 1S   266    0.00000
 3941  248 LEU  HD12 -24.03187   4.07264 -48.28766 1S   266    0.00000
 3942  248 LEU  HD13 -25.18643   2.82395 -48.88057 1S   266    0.00000
 3943  248 LEU  CD2  -26.42887   2.26103 -46.48507 1S   266    1.00000
 3944  248 LEU  HD21 -27.25139   2.55333 -45.79994 1S   266    0.00000
 3945  248 LEU  HD22 -25.81769   1.47253 -45.99644 1S   266    0.00000
 3946  248 LEU  HD23 -26.88337   1.83962 -47.40511 1S   266    0.00000
 3947  248 LEU  C    -24.63256   4.63316 -43.23152 1S   266    1.00000
 3948  248 LEU  O    -23.46703   4.24443 -43.29009 1S   266    1.00000
 3949  249 LEU  N    -25.08514   5.34267 -42.17032 1S   267    1.00000
 3950  249 LEU  HN   -26.03240   5.64442 -42.10680 1S   267    0.00000
 3951  249 LEU  CA   -24.17298   5.87941 -41.17765 1S   267    1.00000
 3952  249 LEU  HA   -23.15682   5.61392 -41.42404 1S   267    0.00000
 3953  249 LEU  CB   -24.26057   7.41267 -41.12567 1S   267    1.00000
 3954  249 LEU  HB1  -23.62471   7.80568 -40.30067 1S   267    0.00000
 3955  249 LEU  HB2  -25.31383   7.70781 -40.92270 1S   267    0.00000
 3956  249 LEU  CG   -23.79410   8.08760 -42.43330 1S   267    1.00000
 3957  249 LEU  HG   -24.41713   7.69686 -43.27146 1S   267    0.00000
 3958  249 LEU  CD1  -24.03063   9.60303 -42.37178 1S   267    1.00000
 3959  249 LEU  HD11 -23.43297  10.05510 -41.55228 1S   267    0.00000
 3960  249 LEU  HD12 -25.10584   9.81789 -42.19367 1S   267    0.00000
 3961  249 LEU  HD13 -23.73419  10.06737 -43.33367 1S   267    0.00000
 3962  249 LEU  CD2  -22.32105   7.77022 -42.75880 1S   267    1.00000
 3963  249 LEU  HD21 -22.19675   6.70170 -43.03302 1S   267    0.00000
 3964  249 LEU  HD22 -21.67561   7.98700 -41.88176 1S   267    0.00000
 3965  249 LEU  HD23 -21.97675   8.38741 -43.61342 1S   267    0.00000
 3966  249 LEU  C    -24.38437   5.33764 -39.79277 1S   267    1.00000
 3967  249 LEU  O    -23.65163   5.70480 -38.87677 1S   267    1.00000
 3968  250 GLY  N    -25.35178   4.42154 -39.59517 1S   268    1.00000
 3969  250 GLY  HN   -25.95002   4.12674 -40.33475 1S   268    0.00000
 3970  250 GLY  CA   -25.45673   3.70327 -38.34667 1S   268    1.00000
 3971  250 GLY  HA1  -24.51850   3.74284 -37.81052 1S   268    0.00000
 3972  250 GLY  HA2  -25.73147   2.69084 -38.60437 1S   268    0.00000
 3973  250 GLY  C    -26.52512   4.23359 -37.44235 1S   268    1.00000
 3974  250 GLY  O    -26.85469   3.58658 -36.45684 1S   268    1.00000
 3975  251 ASP  N    -27.12760   5.40001 -37.73665 1S   269    1.00000
 3976  251 ASP  HN   -26.84721   5.97246 -38.50299 1S   269    0.00000
 3977  251 ASP  CA   -28.33941   5.78482 -37.05437 1S   269    1.00000
 3978  251 ASP  HA   -28.92202   4.88775 -36.88785 1S   269    0.00000
 3979  251 ASP  CB   -28.14730   6.45480 -35.65265 1S   269    1.00000
 3980  251 ASP  HB1  -27.57412   5.74341 -35.01724 1S   269    0.00000
 3981  251 ASP  HB2  -29.13545   6.59875 -35.16880 1S   269    0.00000
 3982  251 ASP  CG   -27.40291   7.79338 -35.63935 1S   269    1.00000
 3983  251 ASP  OD1  -27.60584   8.60749 -36.57288 1S   269    1.00000
 3984  251 ASP  OD2  -26.65276   8.04003 -34.65819 1S   269    1.00000
 3985  251 ASP  C    -29.13335   6.58716 -38.04526 1S   269    1.00000
 3986  251 ASP  O    -28.79110   6.63220 -39.22724 1S   269    1.00000
 3987  252 MET  N    -30.24123   7.21781 -37.59178 1S   270    1.00000
 3988  252 MET  HN   -30.47899   7.20483 -36.62374 1S   270    0.00000
 3989  252 MET  CA   -31.20099   7.86253 -38.45793 1S   270    1.00000
 3990  252 MET  HA   -31.44529   7.15920 -39.23826 1S   270    0.00000
 3991  252 MET  CB   -32.50833   8.19479 -37.68283 1S   270    1.00000
 3992  252 MET  HB1  -32.25741   8.84372 -36.82013 1S   270    0.00000
 3993  252 MET  HB2  -32.91375   7.24517 -37.26717 1S   270    0.00000
 3994  252 MET  CG   -33.63238   8.88286 -38.48679 1S   270    1.00000
 3995  252 MET  HG1  -33.27518   9.89274 -38.78438 1S   270    0.00000
 3996  252 MET  HG2  -34.49937   9.04666 -37.80918 1S   270    0.00000
 3997  252 MET  SD   -34.17097   7.97518 -39.96839 1S   270    1.00000
 3998  252 MET  CE   -35.48288   7.00661 -39.18664 1S   270    1.00000
 3999  252 MET  HE1  -36.26056   7.66736 -38.74826 1S   270    0.00000
 4000  252 MET  HE2  -35.08183   6.36445 -38.37438 1S   270    0.00000
 4001  252 MET  HE3  -35.97898   6.35212 -39.93528 1S   270    0.00000
 4002  252 MET  C    -30.62763   9.08709 -39.13840 1S   270    1.00000
 4003  252 MET  O    -31.11417   9.47658 -40.19539 1S   270    1.00000
 4004  253 TRP  N    -29.56640   9.70818 -38.57283 1S   271    1.00000
 4005  253 TRP  HN   -29.12092   9.33414 -37.75910 1S   271    0.00000
 4006  253 TRP  CA   -29.07979  10.99380 -39.02639 1S   271    1.00000
 4007  253 TRP  HA   -29.60975  11.30109 -39.91565 1S   271    0.00000
 4008  253 TRP  CB   -29.27838  12.06040 -37.92241 1S   271    1.00000
 4009  253 TRP  HB1  -29.02592  13.06092 -38.33455 1S   271    0.00000
 4010  253 TRP  HB2  -28.60826  11.84802 -37.06189 1S   271    0.00000
 4011  253 TRP  CG   -30.70516  12.11132 -37.42165 1S   271    1.00000
 4012  253 TRP  CD1  -31.76199  12.77975 -37.96581 1S   271    1.00000
 4013  253 TRP  HD1  -31.69762  13.46576 -38.79775 1S   271    0.00000
 4014  253 TRP  NE1  -32.91521  12.46561 -37.29834 1S   271    1.00000
 4015  253 TRP  HE1  -33.80607  12.82648 -37.48974 1S   271    0.00000
 4016  253 TRP  CE2  -32.61666  11.61519 -36.26316 1S   271    1.00000
 4017  253 TRP  CD2  -31.22933  11.36068 -36.30526 1S   271    1.00000
 4018  253 TRP  CE3  -30.62404  10.51365 -35.38032 1S   271    1.00000
 4019  253 TRP  HE3  -29.56807  10.29406 -35.40478 1S   271    0.00000
 4020  253 TRP  CZ3  -31.43749   9.93342 -34.39263 1S   271    1.00000
 4021  253 TRP  HZ3  -30.99716   9.27081 -33.66242 1S   271    0.00000
 4022  253 TRP  CZ2  -33.42172  11.03580 -35.28824 1S   271    1.00000
 4023  253 TRP  HZ2  -34.48517  11.21776 -35.25317 1S   271    0.00000
 4024  253 TRP  CH2  -32.81609  10.19452 -34.34615 1S   271    1.00000
 4025  253 TRP  HH2  -33.41925   9.73295 -33.57733 1S   271    0.00000
 4026  253 TRP  C    -27.61804  10.95733 -39.38343 1S   271    1.00000
 4027  253 TRP  O    -27.10846  11.88291 -40.01393 1S   271    1.00000
 4028  254 GLY  N    -26.88991   9.90503 -38.95292 1S   272    1.00000
 4029  254 GLY  HN   -27.32221   9.12365 -38.50411 1S   272    0.00000
 4030  254 GLY  CA   -25.44707   9.89030 -38.95647 1S   272    1.00000
 4031  254 GLY  HA1  -25.09121  10.26462 -39.90367 1S   272    0.00000
 4032  254 GLY  HA2  -25.13838   8.87762 -38.74301 1S   272    0.00000
 4033  254 GLY  C    -24.91380  10.76825 -37.86830 1S   272    1.00000
 4034  254 GLY  O    -23.85622  11.37686 -38.02113 1S   272    1.00000
 4035  255 ARG  N    -25.64323  10.84130 -36.72702 1S   273    1.00000
 4036  255 ARG  HN   -26.49377  10.32351 -36.63407 1S   273    0.00000
 4037  255 ARG  CA   -25.25556  11.62257 -35.57834 1S   273    1.00000
 4038  255 ARG  HA   -25.02872  12.62044 -35.91942 1S   273    0.00000
 4039  255 ARG  CB   -26.35912  11.71205 -34.49775 1S   273    1.00000
 4040  255 ARG  HB1  -26.62790  10.69342 -34.14312 1S   273    0.00000
 4041  255 ARG  HB2  -27.26716  12.16088 -34.95809 1S   273    0.00000
 4042  255 ARG  CG   -25.93424  12.57971 -33.30126 1S   273    1.00000
 4043  255 ARG  HG1  -25.60468  13.57095 -33.68380 1S   273    0.00000
 4044  255 ARG  HG2  -25.05849  12.09949 -32.80812 1S   273    0.00000
 4045  255 ARG  CD   -27.02427  12.77928 -32.24801 1S   273    1.00000
 4046  255 ARG  HD1  -27.35322  11.79681 -31.84670 1S   273    0.00000
 4047  255 ARG  HD2  -27.89135  13.33589 -32.66364 1S   273    0.00000
 4048  255 ARG  NE   -26.39858  13.59896 -31.15922 1S   273    1.00000
 4049  255 ARG  HE   -25.60560  14.15584 -31.38936 1S   273    0.00000
 4050  255 ARG  CZ   -26.83093  13.60441 -29.86697 1S   273    1.00000
 4051  255 ARG  NH1  -26.17394  14.37212 -28.95778 1S   273    1.00000
 4052  255 ARG  HH11 -25.40292  14.93556 -29.24831 1S   273    0.00000
 4053  255 ARG  HH12 -26.47221  14.38615 -28.00519 1S   273    0.00000
 4054  255 ARG  NH2  -27.88791  12.84870 -29.46906 1S   273    1.00000
 4055  255 ARG  HH21 -28.35633  12.27404 -30.13989 1S   273    0.00000
 4056  255 ARG  HH22 -28.15946  12.83777 -28.51362 1S   273    0.00000
 4057  255 ARG  C    -24.00663  11.03699 -34.98154 1S   273    1.00000
 4058  255 ARG  O    -23.05729  11.76148 -34.69949 1S   273    1.00000
 4059  256 PHE  N    -23.97815   9.69931 -34.81455 1S   274    1.00000
 4060  256 PHE  HN   -24.76980   9.13038 -35.03796 1S   274    0.00000
 4061  256 PHE  CA   -22.80178   8.98777 -34.38325 1S   274    1.00000
 4062  256 PHE  HA   -21.94199   9.64535 -34.37737 1S   274    0.00000
 4063  256 PHE  CB   -22.97117   8.30763 -33.00240 1S   274    1.00000
 4064  256 PHE  HB1  -21.99780   7.89639 -32.66049 1S   274    0.00000
 4065  256 PHE  HB2  -23.70799   7.47725 -33.06630 1S   274    0.00000
 4066  256 PHE  CG   -23.46153   9.27661 -31.95624 1S   274    1.00000
 4067  256 PHE  CD1  -22.57605  10.16554 -31.32550 1S   274    1.00000
 4068  256 PHE  HD1  -21.53590  10.16726 -31.60607 1S   274    0.00000
 4069  256 PHE  CE1  -23.02589  11.03972 -30.32786 1S   274    1.00000
 4070  256 PHE  HE1  -22.33450  11.71883 -29.85119 1S   274    0.00000
 4071  256 PHE  CZ   -24.37115  11.02483 -29.94306 1S   274    1.00000
 4072  256 PHE  HZ   -24.71730  11.69002 -29.16644 1S   274    0.00000
 4073  256 PHE  CD2  -24.81434   9.28278 -31.57027 1S   274    1.00000
 4074  256 PHE  HD2  -25.50989   8.60921 -32.04960 1S   274    0.00000
 4075  256 PHE  CE2  -25.26650  10.14625 -30.56514 1S   274    1.00000
 4076  256 PHE  HE2  -26.30628  10.13724 -30.27377 1S   274    0.00000
 4077  256 PHE  C    -22.57715   7.90993 -35.41043 1S   274    1.00000
 4078  256 PHE  O    -23.52848   7.42219 -36.01941 1S   274    1.00000
 4079  257 TRP  N    -21.30081   7.50916 -35.63059 1S   275    1.00000
 4080  257 TRP  HN   -20.52990   7.92892 -35.15394 1S   275    0.00000
 4081  257 TRP  CA   -20.94958   6.47468 -36.58765 1S   275    1.00000
 4082  257 TRP  HA   -21.78525   6.28079 -37.24409 1S   275    0.00000
 4083  257 TRP  CB   -19.72686   6.85730 -37.46131 1S   275    1.00000
 4084  257 TRP  HB1  -19.40573   5.99010 -38.07534 1S   275    0.00000
 4085  257 TRP  HB2  -18.86671   7.13529 -36.81957 1S   275    0.00000
 4086  257 TRP  CG   -19.98122   7.98500 -38.43826 1S   275    1.00000
 4087  257 TRP  CD1  -21.13015   8.69432 -38.66520 1S   275    1.00000
 4088  257 TRP  HD1  -22.06850   8.55290 -38.15046 1S   275    0.00000
 4089  257 TRP  NE1  -20.93720   9.61013 -39.66609 1S   275    1.00000
 4090  257 TRP  HE1  -21.60068  10.25384 -39.98156 1S   275    0.00000
 4091  257 TRP  CE2  -19.64829   9.49174 -40.12817 1S   275    1.00000
 4092  257 TRP  CD2  -19.00780   8.48146 -39.37821 1S   275    1.00000
 4093  257 TRP  CE3  -17.68086   8.13294 -39.62133 1S   275    1.00000
 4094  257 TRP  HE3  -17.17427   7.36289 -39.06161 1S   275    0.00000
 4095  257 TRP  CZ3  -16.99686   8.82435 -40.63462 1S   275    1.00000
 4096  257 TRP  HZ3  -15.96611   8.58022 -40.84433 1S   275    0.00000
 4097  257 TRP  CZ2  -18.97280  10.16516 -41.13552 1S   275    1.00000
 4098  257 TRP  HZ2  -19.45620  10.93363 -41.71988 1S   275    0.00000
 4099  257 TRP  CH2  -17.63559   9.82624 -41.37974 1S   275    1.00000
 4100  257 TRP  HH2  -17.08939  10.34843 -42.15152 1S   275    0.00000
 4101  257 TRP  C    -20.64704   5.18586 -35.87323 1S   275    1.00000
 4102  257 TRP  O    -20.04914   4.28153 -36.45198 1S   275    1.00000
 4103  258 THR  N    -21.08535   5.06306 -34.59838 1S   276    1.00000
 4104  258 THR  HN   -21.56135   5.82863 -34.17177 1S   276    0.00000
 4105  258 THR  CA   -20.87304   3.94111 -33.69990 1S   276    1.00000
 4106  258 THR  HA   -19.83029   3.96600 -33.41490 1S   276    0.00000
 4107  258 THR  CB   -21.74091   4.06434 -32.45332 1S   276    1.00000
 4108  258 THR  HB   -22.81132   3.88986 -32.70334 1S   276    0.00000
 4109  258 THR  OG1  -21.64710   5.37668 -31.91626 1S   276    1.00000
 4110  258 THR  HG1  -22.26806   5.40467 -31.18306 1S   276    0.00000
 4111  258 THR  CG2  -21.28752   3.05807 -31.37604 1S   276    1.00000
 4112  258 THR  HG21 -20.21534   3.21123 -31.12917 1S   276    0.00000
 4113  258 THR  HG22 -21.42488   2.01293 -31.72264 1S   276    0.00000
 4114  258 THR  HG23 -21.88577   3.19006 -30.44966 1S   276    0.00000
 4115  258 THR  C    -21.16141   2.59192 -34.32311 1S   276    1.00000
 4116  258 THR  O    -20.38036   1.65241 -34.18145 1S   276    1.00000
 4117  259 ASN  N    -22.30265   2.47324 -35.04036 1S   277    1.00000
 4118  259 ASN  HN   -22.89130   3.26204 -35.19945 1S   277    0.00000
 4119  259 ASN  CA   -22.80029   1.20818 -35.53615 1S   277    1.00000
 4120  259 ASN  HA   -22.54215   0.43919 -34.82004 1S   277    0.00000
 4121  259 ASN  CB   -24.33818   1.23269 -35.69841 1S   277    1.00000
 4122  259 ASN  HB1  -24.70547   0.29053 -36.15719 1S   277    0.00000
 4123  259 ASN  HB2  -24.62965   2.08043 -36.34595 1S   277    0.00000
 4124  259 ASN  CG   -24.98006   1.36841 -34.31125 1S   277    1.00000
 4125  259 ASN  OD1  -24.62316   0.64016 -33.38052 1S   277    1.00000
 4126  259 ASN  ND2  -25.94636   2.31946 -34.16438 1S   277    1.00000
 4127  259 ASN  HD21 -26.23368   2.86383 -34.95878 1S   277    0.00000
 4128  259 ASN  HD22 -26.40817   2.42528 -33.28908 1S   277    0.00000
 4129  259 ASN  C    -22.16181   0.79815 -36.84460 1S   277    1.00000
 4130  259 ASN  O    -22.49922  -0.24880 -37.39389 1S   277    1.00000
 4131  260 LEU  N    -21.17407   1.57560 -37.34887 1S   278    1.00000
 4132  260 LEU  HN   -20.92911   2.44696 -36.92627 1S   278    0.00000
 4133  260 LEU  CA   -20.36527   1.18484 -38.48185 1S   278    1.00000
 4134  260 LEU  HA   -20.96702   0.59681 -39.16069 1S   278    0.00000
 4135  260 LEU  CB   -19.78024   2.39978 -39.24405 1S   278    1.00000
 4136  260 LEU  HB1  -19.20197   2.03448 -40.12252 1S   278    0.00000
 4137  260 LEU  HB2  -19.07745   2.95518 -38.58420 1S   278    0.00000
 4138  260 LEU  CG   -20.84806   3.38818 -39.76358 1S   278    1.00000
 4139  260 LEU  HG   -21.31782   3.88486 -38.88263 1S   278    0.00000
 4140  260 LEU  CD1  -20.20252   4.49261 -40.61990 1S   278    1.00000
 4141  260 LEU  HD11 -19.73618   4.05005 -41.52499 1S   278    0.00000
 4142  260 LEU  HD12 -19.41739   5.02498 -40.04404 1S   278    0.00000
 4143  260 LEU  HD13 -20.96707   5.23088 -40.94032 1S   278    0.00000
 4144  260 LEU  CD2  -21.96535   2.67159 -40.54404 1S   278    1.00000
 4145  260 LEU  HD21 -22.58004   2.04178 -39.86721 1S   278    0.00000
 4146  260 LEU  HD22 -21.53131   2.02885 -41.33833 1S   278    0.00000
 4147  260 LEU  HD23 -22.63663   3.41247 -41.01958 1S   278    0.00000
 4148  260 LEU  C    -19.20464   0.32463 -38.05094 1S   278    1.00000
 4149  260 LEU  O    -18.43313  -0.11826 -38.89481 1S   278    1.00000
 4150  261 TYR  N    -19.04867   0.04643 -36.73285 1S   279    1.00000
 4151  261 TYR  HN   -19.71361   0.37357 -36.06454 1S   279    0.00000
 4152  261 TYR  CA   -17.90005  -0.63971 -36.17687 1S   279    1.00000
 4153  261 TYR  HA   -17.02937  -0.06790 -36.46657 1S   279    0.00000
 4154  261 TYR  CB   -17.95579  -0.69403 -34.62413 1S   279    1.00000
 4155  261 TYR  HB1  -18.86696  -1.23624 -34.29223 1S   279    0.00000
 4156  261 TYR  HB2  -18.00203   0.34137 -34.22347 1S   279    0.00000
 4157  261 TYR  CG   -16.73777  -1.36260 -34.02493 1S   279    1.00000
 4158  261 TYR  CD1  -15.49716  -0.70427 -33.98820 1S   279    1.00000
 4159  261 TYR  HD1  -15.41151   0.30531 -34.36210 1S   279    0.00000
 4160  261 TYR  CE1  -14.36422  -1.35047 -33.47673 1S   279    1.00000
 4161  261 TYR  HE1  -13.41982  -0.82780 -33.45296 1S   279    0.00000
 4162  261 TYR  CZ   -14.46513  -2.65962 -32.98835 1S   279    1.00000
 4163  261 TYR  OH   -13.33253  -3.30626 -32.45430 1S   279    1.00000
 4164  261 TYR  HH   -12.57550  -2.73515 -32.60131 1S   279    0.00000
 4165  261 TYR  CD2  -16.81914  -2.68757 -33.55969 1S   279    1.00000
 4166  261 TYR  HD2  -17.75750  -3.21912 -33.62005 1S   279    0.00000
 4167  261 TYR  CE2  -15.69079  -3.33350 -33.04153 1S   279    1.00000
 4168  261 TYR  HE2  -15.76789  -4.35262 -32.69115 1S   279    0.00000
 4169  261 TYR  C    -17.72504  -2.03313 -36.73424 1S   279    1.00000
 4170  261 TYR  O    -16.60069  -2.43288 -37.01356 1S   279    1.00000
 4171  262 SER  N    -18.81830  -2.80612 -36.92320 1S   280    1.00000
 4172  262 SER  HN   -19.73511  -2.47397 -36.71595 1S   280    0.00000
 4173  262 SER  CA   -18.72926  -4.17457 -37.39516 1S   280    1.00000
 4174  262 SER  HA   -18.04610  -4.68740 -36.73173 1S   280    0.00000
 4175  262 SER  CB   -20.08987  -4.91990 -37.32218 1S   280    1.00000
 4176  262 SER  HB1  -20.51034  -4.79538 -36.30056 1S   280    0.00000
 4177  262 SER  HB2  -19.93247  -6.00506 -37.50238 1S   280    0.00000
 4178  262 SER  OG   -21.04603  -4.42769 -38.25801 1S   280    1.00000
 4179  262 SER  HG1  -21.78415  -5.04266 -38.23944 1S   280    0.00000
 4180  262 SER  C    -18.15199  -4.26419 -38.79640 1S   280    1.00000
 4181  262 SER  O    -17.41709  -5.19647 -39.11463 1S   280    1.00000
 4182  263 LEU  N    -18.45996  -3.26365 -39.65275 1S   281    1.00000
 4183  263 LEU  HN   -19.05798  -2.51728 -39.37008 1S   281    0.00000
 4184  263 LEU  CA   -17.99957  -3.21478 -41.01803 1S   281    1.00000
 4185  263 LEU  HA   -17.83395  -4.22346 -41.36246 1S   281    0.00000
 4186  263 LEU  CB   -19.03071  -2.50983 -41.93618 1S   281    1.00000
 4187  263 LEU  HB1  -18.56491  -2.27171 -42.91860 1S   281    0.00000
 4188  263 LEU  HB2  -19.34438  -1.54980 -41.47061 1S   281    0.00000
 4189  263 LEU  CG   -20.28306  -3.37204 -42.22544 1S   281    1.00000
 4190  263 LEU  HG   -20.82747  -3.53333 -41.26597 1S   281    0.00000
 4191  263 LEU  CD1  -21.24682  -2.65416 -43.18777 1S   281    1.00000
 4192  263 LEU  HD11 -20.74348  -2.44468 -44.15505 1S   281    0.00000
 4193  263 LEU  HD12 -21.59717  -1.69637 -42.74957 1S   281    0.00000
 4194  263 LEU  HD13 -22.12913  -3.29674 -43.38829 1S   281    0.00000
 4195  263 LEU  CD2  -19.90191  -4.75764 -42.78414 1S   281    1.00000
 4196  263 LEU  HD21 -19.50444  -5.40778 -41.97599 1S   281    0.00000
 4197  263 LEU  HD22 -19.12347  -4.65103 -43.56974 1S   281    0.00000
 4198  263 LEU  HD23 -20.78693  -5.25984 -43.22588 1S   281    0.00000
 4199  263 LEU  C    -16.67033  -2.52187 -41.16370 1S   281    1.00000
 4200  263 LEU  O    -16.05423  -2.63052 -42.22255 1S   281    1.00000
 4201  264 THR  N    -16.18805  -1.79637 -40.12716 1S   282    1.00000
 4202  264 THR  HN   -16.67033  -1.74890 -39.25477 1S   282    0.00000
 4203  264 THR  CA   -15.00079  -0.97404 -40.25433 1S   282    1.00000
 4204  264 THR  HA   -14.58827  -1.09077 -41.24428 1S   282    0.00000
 4205  264 THR  CB   -15.26566   0.51873 -40.07205 1S   282    1.00000
 4206  264 THR  HB   -14.32936   1.08860 -40.27361 1S   282    0.00000
 4207  264 THR  OG1  -15.69878   0.84116 -38.75658 1S   282    1.00000
 4208  264 THR  HG1  -16.60365   0.51943 -38.69639 1S   282    0.00000
 4209  264 THR  CG2  -16.33505   0.99822 -41.07316 1S   282    1.00000
 4210  264 THR  HG21 -17.30011   0.47704 -40.91707 1S   282    0.00000
 4211  264 THR  HG22 -16.01394   0.79926 -42.11191 1S   282    0.00000
 4212  264 THR  HG23 -16.50858   2.08866 -40.95945 1S   282    0.00000
 4213  264 THR  C    -13.91406  -1.39921 -39.30163 1S   282    1.00000
 4214  264 THR  O    -12.85214  -0.78375 -39.30011 1S   282    1.00000
 4215  265 VAL  N    -14.13119  -2.44940 -38.46954 1S   283    1.00000
 4216  265 VAL  HN   -14.99996  -2.93877 -38.47970 1S   283    0.00000
 4217  265 VAL  CA   -13.20470  -2.87519 -37.43375 1S   283    1.00000
 4218  265 VAL  HA   -13.14563  -2.04173 -36.75539 1S   283    0.00000
 4219  265 VAL  CB   -13.71685  -4.04675 -36.58952 1S   283    1.00000
 4220  265 VAL  HB   -14.58772  -3.67396 -36.00016 1S   283    0.00000
 4221  265 VAL  CG1  -14.22843  -5.19858 -37.47837 1S   283    1.00000
 4222  265 VAL  HG11 -13.41100  -5.60967 -38.10517 1S   283    0.00000
 4223  265 VAL  HG12 -15.04906  -4.85546 -38.14049 1S   283    0.00000
 4224  265 VAL  HG13 -14.62214  -6.01846 -36.84124 1S   283    0.00000
 4225  265 VAL  CG2  -12.65405  -4.52440 -35.57293 1S   283    1.00000
 4226  265 VAL  HG21 -12.26751  -3.67067 -34.97937 1S   283    0.00000
 4227  265 VAL  HG22 -11.80169  -5.01460 -36.08751 1S   283    0.00000
 4228  265 VAL  HG23 -13.10232  -5.26226 -34.87443 1S   283    0.00000
 4229  265 VAL  C    -11.84464  -3.18355 -38.04517 1S   283    1.00000
 4230  265 VAL  O    -11.79878  -3.92190 -39.02998 1S   283    1.00000
 4231  266 PRO  N    -10.72773  -2.62678 -37.56448 1S   284    1.00000
 4232  266 PRO  CD   -10.69779  -1.54692 -36.57193 1S   284    1.00000
 4233  266 PRO  HD1  -10.72460  -2.00293 -35.56080 1S   284    0.00000
 4234  266 PRO  HD2  -11.54326  -0.83774 -36.69555 1S   284    0.00000
 4235  266 PRO  CA    -9.44499  -2.77195 -38.22722 1S   284    1.00000
 4236  266 PRO  HA    -9.54421  -2.45721 -39.25554 1S   284    0.00000
 4237  266 PRO  CB    -8.48873  -1.86875 -37.43546 1S   284    1.00000
 4238  266 PRO  HB1   -7.71864  -1.43903 -38.09419 1S   284    0.00000
 4239  266 PRO  HB2   -7.97736  -2.40564 -36.61107 1S   284    0.00000
 4240  266 PRO  CG    -9.38515  -0.80507 -36.80274 1S   284    1.00000
 4241  266 PRO  HG1   -8.97358  -0.41519 -35.85119 1S   284    0.00000
 4242  266 PRO  HG2   -9.54342   0.03358 -37.51416 1S   284    0.00000
 4243  266 PRO  C     -8.96304  -4.19457 -38.21013 1S   284    1.00000
 4244  266 PRO  O     -8.73962  -4.77192 -39.27302 1S   284    1.00000
 4245  267 PHE  N     -8.80362  -4.75567 -36.99870 1S   285    1.00000
 4246  267 PHE  HN    -9.01490  -4.24106 -36.16869 1S   285    0.00000
 4247  267 PHE  CA    -8.23165  -6.05368 -36.78510 1S   285    1.00000
 4248  267 PHE  HA    -7.87999  -6.47234 -37.71896 1S   285    0.00000
 4249  267 PHE  CB    -7.06927  -5.97881 -35.77243 1S   285    1.00000
 4250  267 PHE  HB1   -6.61252  -6.97893 -35.61465 1S   285    0.00000
 4251  267 PHE  HB2   -7.42004  -5.58337 -34.79465 1S   285    0.00000
 4252  267 PHE  CG    -6.00298  -5.04778 -36.30574 1S   285    1.00000
 4253  267 PHE  CD1   -5.14149  -5.46864 -37.33287 1S   285    1.00000
 4254  267 PHE  HD1   -5.24842  -6.45960 -37.74837 1S   285    0.00000
 4255  267 PHE  CE1   -4.12660  -4.62656 -37.80563 1S   285    1.00000
 4256  267 PHE  HE1   -3.46109  -4.96860 -38.58418 1S   285    0.00000
 4257  267 PHE  CZ    -3.96556  -3.34808 -37.25923 1S   285    1.00000
 4258  267 PHE  HZ    -3.17341  -2.70513 -37.61219 1S   285    0.00000
 4259  267 PHE  CD2   -5.84126  -3.75139 -35.77967 1S   285    1.00000
 4260  267 PHE  HD2   -6.49616  -3.40730 -34.99343 1S   285    0.00000
 4261  267 PHE  CE2   -4.82780  -2.90746 -36.25012 1S   285    1.00000
 4262  267 PHE  HE2   -4.70191  -1.92186 -35.82945 1S   285    0.00000
 4263  267 PHE  C     -9.35552  -6.90438 -36.26853 1S   285    1.00000
 4264  267 PHE  O     -9.59988  -6.98914 -35.06656 1S   285    1.00000
 4265  268 GLY  N    -10.09930  -7.53364 -37.20699 1S   286    1.00000
 4266  268 GLY  HN    -9.83466  -7.49284 -38.16759 1S   286    0.00000
 4267  268 GLY  CA   -11.41167  -8.08868 -36.95639 1S   286    1.00000
 4268  268 GLY  HA1  -11.85387  -8.25106 -37.92835 1S   286    0.00000
 4269  268 GLY  HA2  -11.97044  -7.37449 -36.36877 1S   286    0.00000
 4270  268 GLY  C    -11.44687  -9.40546 -36.23352 1S   286    1.00000
 4271  268 GLY  O    -12.53073  -9.95339 -36.04429 1S   286    1.00000
 4272  269 GLN  N    -10.28305  -9.95658 -35.81438 1S   287    1.00000
 4273  269 GLN  HN    -9.40815  -9.51241 -35.98855 1S   287    0.00000
 4274  269 GLN  CA   -10.23625 -11.22408 -35.11615 1S   287    1.00000
 4275  269 GLN  HA   -11.23840 -11.60544 -34.97829 1S   287    0.00000
 4276  269 GLN  CB    -9.43809 -12.29367 -35.88963 1S   287    1.00000
 4277  269 GLN  HB1   -9.57340 -13.26500 -35.36247 1S   287    0.00000
 4278  269 GLN  HB2   -8.35290 -12.05110 -35.88924 1S   287    0.00000
 4279  269 GLN  CG    -9.92455 -12.41005 -37.34691 1S   287    1.00000
 4280  269 GLN  HG1   -9.51804 -11.56491 -37.94296 1S   287    0.00000
 4281  269 GLN  HG2  -11.03421 -12.35715 -37.37896 1S   287    0.00000
 4282  269 GLN  CD    -9.47786 -13.72639 -37.98498 1S   287    1.00000
 4283  269 GLN  OE1   -8.73569 -13.73491 -38.97180 1S   287    1.00000
 4284  269 GLN  NE2   -9.96935 -14.86456 -37.41018 1S   287    1.00000
 4285  269 GLN  HE21  -9.72821 -15.75314 -37.79315 1S   287    0.00000
 4286  269 GLN  HE22 -10.56157 -14.79766 -36.60698 1S   287    0.00000
 4287  269 GLN  C     -9.64238 -11.07270 -33.74392 1S   287    1.00000
 4288  269 GLN  O     -9.55827 -12.04602 -32.99617 1S   287    1.00000
 4289  270 LYS  N     -9.23266  -9.84278 -33.35884 1S   288    1.00000
 4290  270 LYS  HN    -9.31165  -9.05081 -33.95992 1S   288    0.00000
 4291  270 LYS  CA    -8.68869  -9.58745 -32.04691 1S   288    1.00000
 4292  270 LYS  HA    -8.03032 -10.40728 -31.80806 1S   288    0.00000
 4293  270 LYS  CB    -7.89945  -8.26302 -32.00701 1S   288    1.00000
 4294  270 LYS  HB1   -7.82326  -7.88288 -30.96573 1S   288    0.00000
 4295  270 LYS  HB2   -8.44825  -7.50334 -32.60439 1S   288    0.00000
 4296  270 LYS  CG    -6.47208  -8.40276 -32.54882 1S   288    1.00000
 4297  270 LYS  HG1   -6.07767  -7.38131 -32.74305 1S   288    0.00000
 4298  270 LYS  HG2   -6.48344  -8.95126 -33.51513 1S   288    0.00000
 4299  270 LYS  CD    -5.53121  -9.10083 -31.55246 1S   288    1.00000
 4300  270 LYS  HD1   -5.88940 -10.13484 -31.35642 1S   288    0.00000
 4301  270 LYS  HD2   -5.57453  -8.54167 -30.59261 1S   288    0.00000
 4302  270 LYS  CE    -4.08036  -9.15663 -32.03666 1S   288    1.00000
 4303  270 LYS  HE1   -3.74904  -8.16051 -32.39021 1S   288    0.00000
 4304  270 LYS  HE2   -3.97257  -9.89006 -32.86284 1S   288    0.00000
 4305  270 LYS  NZ    -3.17103  -9.55083 -30.94144 1S   288    1.00000
 4306  270 LYS  HZ1   -3.50473 -10.42748 -30.49621 1S   288    0.00000
 4307  270 LYS  HZ2   -3.14914  -8.79047 -30.22065 1S   288    0.00000
 4308  270 LYS  HZ3   -2.21113  -9.68571 -31.31570 1S   288    0.00000
 4309  270 LYS  C     -9.81573  -9.50391 -31.03924 1S   288    1.00000
 4310  270 LYS  O    -10.86045  -8.93930 -31.36550 1S   288    1.00000
 4311  271 PRO  N     -9.67832 -10.04476 -29.82448 1S   289    1.00000
 4312  271 PRO  CD    -8.48650 -10.74661 -29.34187 1S   289    1.00000
 4313  271 PRO  HD1   -7.56975 -10.14459 -29.51776 1S   289    0.00000
 4314  271 PRO  HD2   -8.41732 -11.72542 -29.86475 1S   289    0.00000
 4315  271 PRO  CA   -10.76268 -10.09587 -28.86062 1S   289    1.00000
 4316  271 PRO  HA   -11.65474 -10.47656 -29.33913 1S   289    0.00000
 4317  271 PRO  CB   -10.25170 -11.02568 -27.74642 1S   289    1.00000
 4318  271 PRO  HB1  -10.57671 -12.06575 -27.97020 1S   289    0.00000
 4319  271 PRO  HB2  -10.61802 -10.74748 -26.73726 1S   289    0.00000
 4320  271 PRO  CG    -8.72413 -10.95327 -27.84613 1S   289    1.00000
 4321  271 PRO  HG1   -8.35720 -10.06396 -27.28786 1S   289    0.00000
 4322  271 PRO  HG2   -8.23005 -11.86579 -27.45777 1S   289    0.00000
 4323  271 PRO  C    -11.05151  -8.72032 -28.31642 1S   289    1.00000
 4324  271 PRO  O    -10.12308  -7.95763 -28.04844 1S   289    1.00000
 4325  272 ASN  N    -12.35207  -8.40103 -28.15061 1S   290    1.00000
 4326  272 ASN  HN   -13.07411  -9.03855 -28.40571 1S   290    0.00000
 4327  272 ASN  CA   -12.79858  -7.15730 -27.58192 1S   290    1.00000
 4328  272 ASN  HA   -12.04915  -6.39904 -27.77097 1S   290    0.00000
 4329  272 ASN  CB   -14.16500  -6.72955 -28.18676 1S   290    1.00000
 4330  272 ASN  HB1  -15.00543  -7.24463 -27.67623 1S   290    0.00000
 4331  272 ASN  HB2  -14.18580  -7.04002 -29.25439 1S   290    0.00000
 4332  272 ASN  CG   -14.36944  -5.21066 -28.10051 1S   290    1.00000
 4333  272 ASN  OD1  -14.50645  -4.64017 -27.01477 1S   290    1.00000
 4334  272 ASN  ND2  -14.38803  -4.53906 -29.29115 1S   290    1.00000
 4335  272 ASN  HD21 -14.50061  -3.54857 -29.29326 1S   290    0.00000
 4336  272 ASN  HD22 -14.27089  -5.03997 -30.14913 1S   290    0.00000
 4337  272 ASN  C    -12.92854  -7.38667 -26.09562 1S   290    1.00000
 4338  272 ASN  O    -13.32058  -8.46957 -25.66134 1S   290    1.00000
 4339  273 ILE  N    -12.59677  -6.36002 -25.27829 1S   291    1.00000
 4340  273 ILE  HN   -12.26121  -5.49633 -25.64448 1S   291    0.00000
 4341  273 ILE  CA   -12.74788  -6.41144 -23.84084 1S   291    1.00000
 4342  273 ILE  HA   -12.40938  -7.37918 -23.49441 1S   291    0.00000
 4343  273 ILE  CB   -11.95410  -5.32747 -23.11443 1S   291    1.00000
 4344  273 ILE  HB   -12.22762  -4.33078 -23.53096 1S   291    0.00000
 4345  273 ILE  CG2  -12.27917  -5.32093 -21.59903 1S   291    1.00000
 4346  273 ILE  HG21 -12.01318  -6.29656 -21.14218 1S   291    0.00000
 4347  273 ILE  HG22 -13.35149  -5.11408 -21.40739 1S   291    0.00000
 4348  273 ILE  HG23 -11.71033  -4.52106 -21.08322 1S   291    0.00000
 4349  273 ILE  CG1  -10.44711  -5.55242 -23.36270 1S   291    1.00000
 4350  273 ILE  HG11 -10.23025  -5.45202 -24.44895 1S   291    0.00000
 4351  273 ILE  HG12 -10.19350  -6.59081 -23.05668 1S   291    0.00000
 4352  273 ILE  CD    -9.54635  -4.58739 -22.59514 1S   291    1.00000
 4353  273 ILE  HD1   -9.59041  -4.78474 -21.50419 1S   291    0.00000
 4354  273 ILE  HD2   -9.85951  -3.53680 -22.77447 1S   291    0.00000
 4355  273 ILE  HD3   -8.49019  -4.70457 -22.91812 1S   291    0.00000
 4356  273 ILE  C    -14.20962  -6.25926 -23.51357 1S   291    1.00000
 4357  273 ILE  O    -14.81615  -5.22513 -23.78880 1S   291    1.00000
 4358  274 ASP  N    -14.79419  -7.30930 -22.89960 1S   292    1.00000
 4359  274 ASP  HN   -14.30385  -8.16226 -22.73929 1S   292    0.00000
 4360  274 ASP  CA   -16.12720  -7.24963 -22.37235 1S   292    1.00000
 4361  274 ASP  HA   -16.35594  -6.22753 -22.11847 1S   292    0.00000
 4362  274 ASP  CB   -17.19429  -7.78736 -23.36235 1S   292    1.00000
 4363  274 ASP  HB1  -17.00085  -8.85548 -23.59108 1S   292    0.00000
 4364  274 ASP  HB2  -17.12067  -7.21075 -24.31036 1S   292    0.00000
 4365  274 ASP  CG   -18.61750  -7.62715 -22.82460 1S   292    1.00000
 4366  274 ASP  OD1  -18.78782  -6.96733 -21.76590 1S   292    1.00000
 4367  274 ASP  OD2  -19.55405  -8.16738 -23.46765 1S   292    1.00000
 4368  274 ASP  C    -16.08641  -8.05498 -21.10221 1S   292    1.00000
 4369  274 ASP  O    -15.93701  -9.27524 -21.12854 1S   292    1.00000
 4370  275 VAL  N    -16.21981  -7.36613 -19.94576 1S   293    1.00000
 4371  275 VAL  HN   -16.35942  -6.37896 -19.94591 1S   293    0.00000
 4372  275 VAL  CA   -16.10471  -7.98169 -18.64517 1S   293    1.00000
 4373  275 VAL  HA   -15.45816  -8.84495 -18.72819 1S   293    0.00000
 4374  275 VAL  CB   -15.48008  -7.05913 -17.60582 1S   293    1.00000
 4375  275 VAL  HB   -15.42282  -7.61516 -16.64491 1S   293    0.00000
 4376  275 VAL  CG1  -14.03650  -6.71918 -18.03169 1S   293    1.00000
 4377  275 VAL  HG11 -14.02621  -6.17055 -18.99643 1S   293    0.00000
 4378  275 VAL  HG12 -13.43424  -7.64552 -18.13864 1S   293    0.00000
 4379  275 VAL  HG13 -13.55775  -6.07781 -17.26149 1S   293    0.00000
 4380  275 VAL  CG2  -16.31865  -5.78486 -17.37471 1S   293    1.00000
 4381  275 VAL  HG21 -17.33823  -6.03090 -17.01372 1S   293    0.00000
 4382  275 VAL  HG22 -16.39845  -5.20051 -18.31068 1S   293    0.00000
 4383  275 VAL  HG23 -15.82913  -5.14407 -16.61093 1S   293    0.00000
 4384  275 VAL  C    -17.44053  -8.47142 -18.13492 1S   293    1.00000
 4385  275 VAL  O    -17.53358  -8.88282 -16.98229 1S   293    1.00000
 4386  276 THR  N    -18.50374  -8.46703 -18.97921 1S   294    1.00000
 4387  276 THR  HN   -18.39458  -8.14539 -19.91882 1S   294    0.00000
 4388  276 THR  CA   -19.86229  -8.83576 -18.60823 1S   294    1.00000
 4389  276 THR  HA   -20.16383  -8.15759 -17.82118 1S   294    0.00000
 4390  276 THR  CB   -20.84798  -8.70792 -19.76128 1S   294    1.00000
 4391  276 THR  HB   -20.52348  -9.32334 -20.62966 1S   294    0.00000
 4392  276 THR  OG1  -20.91791  -7.35264 -20.18051 1S   294    1.00000
 4393  276 THR  HG1  -20.18212  -7.22737 -20.79852 1S   294    0.00000
 4394  276 THR  CG2  -22.26279  -9.14372 -19.32816 1S   294    1.00000
 4395  276 THR  HG21 -22.50163  -8.71481 -18.33479 1S   294    0.00000
 4396  276 THR  HG22 -22.33546 -10.24891 -19.25705 1S   294    0.00000
 4397  276 THR  HG23 -23.02259  -8.79517 -20.05902 1S   294    0.00000
 4398  276 THR  C    -19.94814 -10.23295 -18.04674 1S   294    1.00000
 4399  276 THR  O    -20.51760 -10.42751 -16.97496 1S   294    1.00000
 4400  277 ASP  N    -19.35139 -11.23432 -18.73876 1S   295    1.00000
 4401  277 ASP  HN   -18.90385 -11.06088 -19.61223 1S   295    0.00000
 4402  277 ASP  CA   -19.32217 -12.61428 -18.29387 1S   295    1.00000
 4403  277 ASP  HA   -20.34571 -12.94156 -18.16719 1S   295    0.00000
 4404  277 ASP  CB   -18.57119 -13.54547 -19.28235 1S   295    1.00000
 4405  277 ASP  HB1  -18.30281 -14.50784 -18.79261 1S   295    0.00000
 4406  277 ASP  HB2  -17.63464 -13.05117 -19.61730 1S   295    0.00000
 4407  277 ASP  CG   -19.42656 -13.88825 -20.50361 1S   295    1.00000
 4408  277 ASP  OD1  -20.68082 -13.83178 -20.40563 1S   295    1.00000
 4409  277 ASP  OD2  -18.82178 -14.23982 -21.55121 1S   295    1.00000
 4410  277 ASP  C    -18.66119 -12.75207 -16.94642 1S   295    1.00000
 4411  277 ASP  O    -19.15836 -13.48535 -16.10196 1S   295    1.00000
 4412  278 ALA  N    -17.55518 -12.01450 -16.69657 1S   296    1.00000
 4413  278 ALA  HN   -17.18201 -11.40422 -17.39016 1S   296    0.00000
 4414  278 ALA  CA   -16.83664 -12.04613 -15.44222 1S   296    1.00000
 4415  278 ALA  HA   -16.62728 -13.08282 -15.21737 1S   296    0.00000
 4416  278 ALA  CB   -15.49943 -11.29266 -15.53933 1S   296    1.00000
 4417  278 ALA  HB1  -15.65976 -10.22507 -15.79771 1S   296    0.00000
 4418  278 ALA  HB2  -14.86932 -11.75075 -16.33175 1S   296    0.00000
 4419  278 ALA  HB3  -14.94136 -11.34708 -14.58026 1S   296    0.00000
 4420  278 ALA  C    -17.64092 -11.47355 -14.29283 1S   296    1.00000
 4421  278 ALA  O    -17.53091 -11.94821 -13.16592 1S   296    1.00000
 4422  279 MET  N    -18.50503 -10.46263 -14.55129 1S   297    1.00000
 4423  279 MET  HN   -18.57046 -10.06612 -15.46555 1S   297    0.00000
 4424  279 MET  CA   -19.40085  -9.90208 -13.55878 1S   297    1.00000
 4425  279 MET  HA   -18.81874  -9.66184 -12.67916 1S   297    0.00000
 4426  279 MET  CB   -20.11402  -8.61996 -14.05282 1S   297    1.00000
 4427  279 MET  HB1  -20.80600  -8.25832 -13.26054 1S   297    0.00000
 4428  279 MET  HB2  -20.72239  -8.86281 -14.95112 1S   297    0.00000
 4429  279 MET  CG   -19.15456  -7.46632 -14.39767 1S   297    1.00000
 4430  279 MET  HG1  -18.30232  -7.87915 -14.97199 1S   297    0.00000
 4431  279 MET  HG2  -18.73167  -7.05811 -13.45431 1S   297    0.00000
 4432  279 MET  SD   -19.89921  -6.13222 -15.38277 1S   297    1.00000
 4433  279 MET  CE   -21.01078  -5.47860 -14.10717 1S   297    1.00000
 4434  279 MET  HE1  -20.43471  -5.11995 -13.22866 1S   297    0.00000
 4435  279 MET  HE2  -21.73693  -6.24403 -13.76335 1S   297    0.00000
 4436  279 MET  HE3  -21.59697  -4.62092 -14.49736 1S   297    0.00000
 4437  279 MET  C    -20.45714 -10.91352 -13.16714 1S   297    1.00000
 4438  279 MET  O    -20.76598 -11.06053 -11.98855 1S   297    1.00000
 4439  280 VAL  N    -21.00910 -11.66363 -14.15212 1S   298    1.00000
 4440  280 VAL  HN   -20.74068 -11.52595 -15.10427 1S   298    0.00000
 4441  280 VAL  CA   -22.00476 -12.69812 -13.93486 1S   298    1.00000
 4442  280 VAL  HA   -22.76502 -12.28709 -13.28490 1S   298    0.00000
 4443  280 VAL  CB   -22.67442 -13.13137 -15.23797 1S   298    1.00000
 4444  280 VAL  HB   -21.90010 -13.45173 -15.97124 1S   298    0.00000
 4445  280 VAL  CG1  -23.64734 -14.30948 -15.00621 1S   298    1.00000
 4446  280 VAL  HG11 -24.34560 -14.07664 -14.17482 1S   298    0.00000
 4447  280 VAL  HG12 -23.09503 -15.24083 -14.76125 1S   298    0.00000
 4448  280 VAL  HG13 -24.24240 -14.49747 -15.92464 1S   298    0.00000
 4449  280 VAL  CG2  -23.43152 -11.91974 -15.82391 1S   298    1.00000
 4450  280 VAL  HG21 -22.74534 -11.07895 -16.04737 1S   298    0.00000
 4451  280 VAL  HG22 -24.20167 -11.56458 -15.10702 1S   298    0.00000
 4452  280 VAL  HG23 -23.93911 -12.21084 -16.76794 1S   298    0.00000
 4453  280 VAL  C    -21.39128 -13.88640 -13.21849 1S   298    1.00000
 4454  280 VAL  O    -22.00835 -14.45081 -12.31613 1S   298    1.00000
 4455  281 ASP  N    -20.13912 -14.26421 -13.57427 1S   299    1.00000
 4456  281 ASP  HN   -19.67509 -13.81238 -14.33608 1S   299    0.00000
 4457  281 ASP  CA   -19.38017 -15.34088 -12.96486 1S   299    1.00000
 4458  281 ASP  HA   -19.95407 -16.25178 -13.06534 1S   299    0.00000
 4459  281 ASP  CB   -17.97692 -15.51434 -13.61630 1S   299    1.00000
 4460  281 ASP  HB1  -17.32977 -16.16168 -12.98587 1S   299    0.00000
 4461  281 ASP  HB2  -17.48924 -14.52202 -13.70929 1S   299    0.00000
 4462  281 ASP  CG   -18.04622 -16.15914 -15.00499 1S   299    1.00000
 4463  281 ASP  OD1  -19.14377 -16.61825 -15.41614 1S   299    1.00000
 4464  281 ASP  OD2  -16.97459 -16.21013 -15.66688 1S   299    1.00000
 4465  281 ASP  C    -19.17798 -15.09849 -11.48663 1S   299    1.00000
 4466  281 ASP  O    -19.35058 -16.00583 -10.67528 1S   299    1.00000
 4467  282 GLN  N    -18.83508 -13.84883 -11.10227 1S   300    1.00000
 4468  282 GLN  HN   -18.69579 -13.12443 -11.77577 1S   300    0.00000
 4469  282 GLN  CA   -18.58604 -13.48270  -9.72647 1S   300    1.00000
 4470  282 GLN  HA   -18.18595 -14.33911  -9.20155 1S   300    0.00000
 4471  282 GLN  CB   -17.55586 -12.33914  -9.64369 1S   300    1.00000
 4472  282 GLN  HB1  -17.39045 -12.05238  -8.58048 1S   300    0.00000
 4473  282 GLN  HB2  -17.95701 -11.45621 -10.18976 1S   300    0.00000
 4474  282 GLN  CG   -16.20525 -12.73545 -10.25818 1S   300    1.00000
 4475  282 GLN  HG1  -16.35544 -13.11252 -11.29195 1S   300    0.00000
 4476  282 GLN  HG2  -15.73566 -13.54231  -9.65808 1S   300    0.00000
 4477  282 GLN  CD   -15.27693 -11.52115 -10.29403 1S   300    1.00000
 4478  282 GLN  OE1  -15.35402 -10.61708  -9.45459 1S   300    1.00000
 4479  282 GLN  NE2  -14.36761 -11.52070 -11.31085 1S   300    1.00000
 4480  282 GLN  HE21 -13.69508 -10.78082 -11.37289 1S   300    0.00000
 4481  282 GLN  HE22 -14.35557 -12.27191 -11.96927 1S   300    0.00000
 4482  282 GLN  C    -19.84415 -13.04697  -9.01121 1S   300    1.00000
 4483  282 GLN  O    -19.77114 -12.59266  -7.87025 1S   300    1.00000
 4484  283 ALA  N    -21.02776 -13.19167  -9.65656 1S   301    1.00000
 4485  283 ALA  HN   -21.04979 -13.55241 -10.58749 1S   301    0.00000
 4486  283 ALA  CA   -22.33017 -12.93932  -9.07769 1S   301    1.00000
 4487  283 ALA  HA   -23.03671 -13.09787  -9.87960 1S   301    0.00000
 4488  283 ALA  CB   -22.68532 -13.92098  -7.94130 1S   301    1.00000
 4489  283 ALA  HB1  -22.02641 -13.75989  -7.06159 1S   301    0.00000
 4490  283 ALA  HB2  -22.54988 -14.96616  -8.29086 1S   301    0.00000
 4491  283 ALA  HB3  -23.74163 -13.79305  -7.62265 1S   301    0.00000
 4492  283 ALA  C    -22.50889 -11.51482  -8.61352 1S   301    1.00000
 4493  283 ALA  O    -23.05215 -11.25541  -7.54044 1S   301    1.00000
 4494  284 TRP  N    -22.06853 -10.54584  -9.44731 1S   302    1.00000
 4495  284 TRP  HN   -21.59601 -10.77438 -10.29788 1S   302    0.00000
 4496  284 TRP  CA   -22.25804  -9.13759  -9.20000 1S   302    1.00000
 4497  284 TRP  HA   -22.00938  -8.92621  -8.16784 1S   302    0.00000
 4498  284 TRP  CB   -21.42299  -8.22406 -10.13684 1S   302    1.00000
 4499  284 TRP  HB1  -21.80073  -7.17935 -10.09036 1S   302    0.00000
 4500  284 TRP  HB2  -21.54786  -8.57706 -11.18321 1S   302    0.00000
 4501  284 TRP  CG   -19.94020  -8.17778  -9.82363 1S   302    1.00000
 4502  284 TRP  CD1  -19.14270  -9.14134  -9.27342 1S   302    1.00000
 4503  284 TRP  HD1  -19.47056 -10.12603  -8.98230 1S   302    0.00000
 4504  284 TRP  NE1  -17.85874  -8.68032  -9.12959 1S   302    1.00000
 4505  284 TRP  HE1  -17.09200  -9.20558  -8.82247 1S   302    0.00000
 4506  284 TRP  CE2  -17.80491  -7.38496  -9.57412 1S   302    1.00000
 4507  284 TRP  CD2  -19.09467  -7.02773 -10.02781 1S   302    1.00000
 4508  284 TRP  CE3  -19.35475  -5.76109 -10.53941 1S   302    1.00000
 4509  284 TRP  HE3  -20.33326  -5.46621 -10.88200 1S   302    0.00000
 4510  284 TRP  CZ3  -18.29037  -4.85006 -10.59483 1S   302    1.00000
 4511  284 TRP  HZ3  -18.45871  -3.85677 -10.98109 1S   302    0.00000
 4512  284 TRP  CZ2  -16.75292  -6.48139  -9.62938 1S   302    1.00000
 4513  284 TRP  HZ2  -15.76177  -6.73852  -9.28581 1S   302    0.00000
 4514  284 TRP  CH2  -17.00820  -5.21209 -10.15160 1S   302    1.00000
 4515  284 TRP  HH2  -16.20439  -4.49203 -10.20399 1S   302    0.00000
 4516  284 TRP  C    -23.70462  -8.81000  -9.42270 1S   302    1.00000
 4517  284 TRP  O    -24.39343  -9.44689 -10.21799 1S   302    1.00000
 4518  285 ASP  N    -24.18734  -7.79807  -8.68718 1S   303    1.00000
 4519  285 ASP  HN   -23.62769  -7.32778  -8.00826 1S   303    0.00000
 4520  285 ASP  CA   -25.52272  -7.28861  -8.81439 1S   303    1.00000
 4521  285 ASP  HA   -25.97146  -7.66408  -9.72348 1S   303    0.00000
 4522  285 ASP  CB   -26.43853  -7.67557  -7.61382 1S   303    1.00000
 4523  285 ASP  HB1  -26.57839  -8.77900  -7.64489 1S   303    0.00000
 4524  285 ASP  HB2  -27.43962  -7.21094  -7.72348 1S   303    0.00000
 4525  285 ASP  CG   -25.88209  -7.32955  -6.22472 1S   303    1.00000
 4526  285 ASP  OD1  -24.81813  -6.66598  -6.12267 1S   303    1.00000
 4527  285 ASP  OD2  -26.54490  -7.73335  -5.23296 1S   303    1.00000
 4528  285 ASP  C    -25.38257  -5.80411  -8.98304 1S   303    1.00000
 4529  285 ASP  O    -24.27259  -5.27660  -9.03801 1S   303    1.00000
 4530  286 ALA  N    -26.52535  -5.08714  -9.06517 1S   304    1.00000
 4531  286 ALA  HN   -27.41298  -5.53847  -9.03770 1S   304    0.00000
 4532  286 ALA  CA   -26.56552  -3.65188  -9.21301 1S   304    1.00000
 4533  286 ALA  HA   -26.00859  -3.39251 -10.10290 1S   304    0.00000
 4534  286 ALA  CB   -28.00317  -3.13598  -9.34630 1S   304    1.00000
 4535  286 ALA  HB1  -28.60393  -3.41088  -8.45328 1S   304    0.00000
 4536  286 ALA  HB2  -28.47924  -3.58960 -10.24185 1S   304    0.00000
 4537  286 ALA  HB3  -28.02386  -2.03111  -9.46510 1S   304    0.00000
 4538  286 ALA  C    -25.92883  -2.96507  -8.03662 1S   304    1.00000
 4539  286 ALA  O    -25.15230  -2.03573  -8.21210 1S   304    1.00000
 4540  287 GLN  N    -26.19135  -3.45414  -6.80321 1S   305    1.00000
 4541  287 GLN  HN   -26.80266  -4.23282  -6.68873 1S   305    0.00000
 4542  287 GLN  CA   -25.59727  -2.95882  -5.57918 1S   305    1.00000
 4543  287 GLN  HA   -25.93245  -1.94025  -5.44012 1S   305    0.00000
 4544  287 GLN  CB   -26.03733  -3.82929  -4.37855 1S   305    1.00000
 4545  287 GLN  HB1  -25.84029  -4.89317  -4.63691 1S   305    0.00000
 4546  287 GLN  HB2  -27.13843  -3.73367  -4.25295 1S   305    0.00000
 4547  287 GLN  CG   -25.33552  -3.55358  -3.03181 1S   305    1.00000
 4548  287 GLN  HG1  -24.23743  -3.45891  -3.15667 1S   305    0.00000
 4549  287 GLN  HG2  -25.52036  -4.42377  -2.36425 1S   305    0.00000
 4550  287 GLN  CD   -25.88140  -2.29855  -2.34678 1S   305    1.00000
 4551  287 GLN  OE1  -26.75284  -1.58667  -2.85414 1S   305    1.00000
 4552  287 GLN  NE2  -25.34380  -2.04194  -1.11648 1S   305    1.00000
 4553  287 GLN  HE21 -25.68200  -1.27040  -0.58452 1S   305    0.00000
 4554  287 GLN  HE22 -24.63180  -2.64408  -0.75333 1S   305    0.00000
 4555  287 GLN  C    -24.08938  -2.94710  -5.65941 1S   305    1.00000
 4556  287 GLN  O    -23.46700  -1.92854  -5.37308 1S   305    1.00000
 4557  288 ARG  N    -23.47475  -4.07011  -6.09909 1S   306    1.00000
 4558  288 ARG  HN   -24.00311  -4.89358  -6.31338 1S   306    0.00000
 4559  288 ARG  CA   -22.04596  -4.19696  -6.25447 1S   306    1.00000
 4560  288 ARG  HA   -21.61403  -3.97314  -5.28966 1S   306    0.00000
 4561  288 ARG  CB   -21.63414  -5.62524  -6.67527 1S   306    1.00000
 4562  288 ARG  HB1  -22.15207  -5.89751  -7.62032 1S   306    0.00000
 4563  288 ARG  HB2  -21.98183  -6.33380  -5.89012 1S   306    0.00000
 4564  288 ARG  CG   -20.12139  -5.81984  -6.86810 1S   306    1.00000
 4565  288 ARG  HG1  -19.76441  -5.18067  -7.70558 1S   306    0.00000
 4566  288 ARG  HG2  -19.95207  -6.87618  -7.17086 1S   306    0.00000
 4567  288 ARG  CD   -19.30706  -5.50206  -5.60608 1S   306    1.00000
 4568  288 ARG  HD1  -19.63171  -6.12040  -4.74310 1S   306    0.00000
 4569  288 ARG  HD2  -19.40299  -4.42866  -5.33510 1S   306    0.00000
 4570  288 ARG  NE   -17.86051  -5.74835  -5.88402 1S   306    1.00000
 4571  288 ARG  HE   -17.25623  -4.96198  -6.04386 1S   306    0.00000
 4572  288 ARG  CZ   -17.29952  -6.98903  -5.92879 1S   306    1.00000
 4573  288 ARG  NH1  -18.03878  -8.11115  -5.72556 1S   306    1.00000
 4574  288 ARG  HH11 -19.02175  -8.02238  -5.57064 1S   306    0.00000
 4575  288 ARG  HH12 -17.61533  -9.00869  -5.79088 1S   306    0.00000
 4576  288 ARG  NH2  -15.96867  -7.09313  -6.18415 1S   306    1.00000
 4577  288 ARG  HH21 -15.43827  -6.25997  -6.33813 1S   306    0.00000
 4578  288 ARG  HH22 -15.53644  -7.99177  -6.23146 1S   306    0.00000
 4579  288 ARG  C    -21.48687  -3.21011  -7.25211 1S   306    1.00000
 4580  288 ARG  O    -20.46756  -2.58557  -6.97962 1S   306    1.00000
 4581  289 ILE  N    -22.15806  -3.01576  -8.41221 1S   307    1.00000
 4582  289 ILE  HN   -22.98533  -3.54067  -8.60633 1S   307    0.00000
 4583  289 ILE  CA   -21.77217  -2.06742  -9.44535 1S   307    1.00000
 4584  289 ILE  HA   -20.79509  -2.36274  -9.80212 1S   307    0.00000
 4585  289 ILE  CB   -22.74986  -2.09227 -10.62202 1S   307    1.00000
 4586  289 ILE  HB   -23.78789  -2.01803 -10.22999 1S   307    0.00000
 4587  289 ILE  CG2  -22.52705  -0.89504 -11.57439 1S   307    1.00000
 4588  289 ILE  HG21 -21.48096  -0.89250 -11.94413 1S   307    0.00000
 4589  289 ILE  HG22 -22.73005   0.07120 -11.06959 1S   307    0.00000
 4590  289 ILE  HG23 -23.21476  -0.95066 -12.44321 1S   307    0.00000
 4591  289 ILE  CG1  -22.62047  -3.43982 -11.37252 1S   307    1.00000
 4592  289 ILE  HG11 -22.70011  -4.27654 -10.64699 1S   307    0.00000
 4593  289 ILE  HG12 -21.61105  -3.49862 -11.83473 1S   307    0.00000
 4594  289 ILE  CD   -23.68497  -3.64520 -12.45419 1S   307    1.00000
 4595  289 ILE  HD1  -23.54032  -2.93514 -13.29582 1S   307    0.00000
 4596  289 ILE  HD2  -24.69980  -3.49372 -12.03059 1S   307    0.00000
 4597  289 ILE  HD3  -23.62671  -4.67722 -12.85860 1S   307    0.00000
 4598  289 ILE  C    -21.64064  -0.66301  -8.88902 1S   307    1.00000
 4599  289 ILE  O    -20.63035   0.00313  -9.10909 1S   307    1.00000
 4600  290 PHE  N    -22.65075  -0.18754  -8.12714 1S   308    1.00000
 4601  290 PHE  HN   -23.46320  -0.73863  -7.94211 1S   308    0.00000
 4602  290 PHE  CA   -22.64224   1.14766  -7.56982 1S   308    1.00000
 4603  290 PHE  HA   -22.27608   1.82362  -8.33263 1S   308    0.00000
 4604  290 PHE  CB   -24.04665   1.61266  -7.11756 1S   308    1.00000
 4605  290 PHE  HB1  -23.98665   2.48634  -6.43382 1S   308    0.00000
 4606  290 PHE  HB2  -24.59315   0.78963  -6.60894 1S   308    0.00000
 4607  290 PHE  CG   -24.81513   2.04819  -8.32889 1S   308    1.00000
 4608  290 PHE  CD1  -25.52236   1.12094  -9.10008 1S   308    1.00000
 4609  290 PHE  HD1  -25.56198   0.09600  -8.80413 1S   308    0.00000
 4610  290 PHE  CE1  -26.18256   1.50775 -10.26098 1S   308    1.00000
 4611  290 PHE  HE1  -26.69610   0.76712 -10.84187 1S   308    0.00000
 4612  290 PHE  CZ   -26.15692   2.84080 -10.66261 1S   308    1.00000
 4613  290 PHE  HZ   -26.69230   3.12643 -11.54415 1S   308    0.00000
 4614  290 PHE  CD2  -24.78819   3.38719  -8.74711 1S   308    1.00000
 4615  290 PHE  HD2  -24.25246   4.11078  -8.16328 1S   308    0.00000
 4616  290 PHE  CE2  -25.44741   3.78352  -9.91455 1S   308    1.00000
 4617  290 PHE  HE2  -25.39413   4.80394 -10.24830 1S   308    0.00000
 4618  290 PHE  C    -21.67970   1.26506  -6.41519 1S   308    1.00000
 4619  290 PHE  O    -21.13398   2.34129  -6.18765 1S   308    1.00000
 4620  291 LYS  N    -21.41698   0.16354  -5.67025 1S   309    1.00000
 4621  291 LYS  HN   -21.90320  -0.69473  -5.82979 1S   309    0.00000
 4622  291 LYS  CA   -20.42910   0.13816  -4.60949 1S   309    1.00000
 4623  291 LYS  HA   -20.59681   1.00569  -3.98982 1S   309    0.00000
 4624  291 LYS  CB   -20.49961  -1.14885  -3.74696 1S   309    1.00000
 4625  291 LYS  HB1  -19.56226  -1.27159  -3.15883 1S   309    0.00000
 4626  291 LYS  HB2  -20.59416  -2.02862  -4.41903 1S   309    0.00000
 4627  291 LYS  CG   -21.66406  -1.14952  -2.74179 1S   309    1.00000
 4628  291 LYS  HG1  -21.75601  -2.16361  -2.29319 1S   309    0.00000
 4629  291 LYS  HG2  -22.61151  -0.92679  -3.27770 1S   309    0.00000
 4630  291 LYS  CD   -21.47160  -0.12437  -1.61315 1S   309    1.00000
 4631  291 LYS  HD1  -21.25394   0.86899  -2.06384 1S   309    0.00000
 4632  291 LYS  HD2  -20.58949  -0.41856  -1.00312 1S   309    0.00000
 4633  291 LYS  CE   -22.70093   0.03411  -0.71648 1S   309    1.00000
 4634  291 LYS  HE1  -22.91038  -0.89749  -0.15171 1S   309    0.00000
 4635  291 LYS  HE2  -23.58805   0.29766  -1.33113 1S   309    0.00000
 4636  291 LYS  NZ   -22.48712   1.13081   0.25406 1S   309    1.00000
 4637  291 LYS  HZ1  -22.03175   1.93336  -0.23244 1S   309    0.00000
 4638  291 LYS  HZ2  -21.86955   0.80152   1.02244 1S   309    0.00000
 4639  291 LYS  HZ3  -23.40083   1.43851   0.64368 1S   309    0.00000
 4640  291 LYS  C    -19.03456   0.27423  -5.16362 1S   309    1.00000
 4641  291 LYS  O    -18.19214   0.93200  -4.55960 1S   309    1.00000
 4642  292 GLU  N    -18.76946  -0.31176  -6.35036 1S   310    1.00000
 4643  292 GLU  HN   -19.45369  -0.88292  -6.80269 1S   310    0.00000
 4644  292 GLU  CA   -17.51238  -0.17673  -7.04807 1S   310    1.00000
 4645  292 GLU  HA   -16.71720  -0.37743  -6.34417 1S   310    0.00000
 4646  292 GLU  CB   -17.40158  -1.15674  -8.23135 1S   310    1.00000
 4647  292 GLU  HB1  -16.53512  -0.89340  -8.87913 1S   310    0.00000
 4648  292 GLU  HB2  -18.31906  -1.07712  -8.85588 1S   310    0.00000
 4649  292 GLU  CG   -17.24051  -2.61939  -7.78034 1S   310    1.00000
 4650  292 GLU  HG1  -17.29037  -3.25478  -8.67937 1S   310    0.00000
 4651  292 GLU  HG2  -18.07176  -2.91083  -7.10877 1S   310    0.00000
 4652  292 GLU  CD   -15.90938  -2.87778  -7.06977 1S   310    1.00000
 4653  292 GLU  OE1  -14.93172  -2.12116  -7.30344 1S   310    1.00000
 4654  292 GLU  OE2  -15.85305  -3.85136  -6.27124 1S   310    1.00000
 4655  292 GLU  C    -17.30758   1.21793  -7.57861 1S   310    1.00000
 4656  292 GLU  O    -16.19403   1.73354  -7.53032 1S   310    1.00000
 4657  293 ALA  N    -18.37835   1.87969  -8.07909 1S   311    1.00000
 4658  293 ALA  HN   -19.27283   1.44161  -8.14618 1S   311    0.00000
 4659  293 ALA  CA   -18.30355   3.24394  -8.55693 1S   311    1.00000
 4660  293 ALA  HA   -17.45447   3.31310  -9.21709 1S   311    0.00000
 4661  293 ALA  CB   -19.56329   3.67625  -9.32736 1S   311    1.00000
 4662  293 ALA  HB1  -20.46462   3.61868  -8.68182 1S   311    0.00000
 4663  293 ALA  HB2  -19.71418   3.01038 -10.20417 1S   311    0.00000
 4664  293 ALA  HB3  -19.45522   4.71749  -9.70121 1S   311    0.00000
 4665  293 ALA  C    -18.05645   4.20612  -7.42716 1S   311    1.00000
 4666  293 ALA  O    -17.25661   5.12569  -7.56147 1S   311    1.00000
 4667  294 GLU  N    -18.69374   3.97994  -6.25677 1S   312    1.00000
 4668  294 GLU  HN   -19.37725   3.25497  -6.18342 1S   312    0.00000
 4669  294 GLU  CA   -18.44866   4.72033  -5.03733 1S   312    1.00000
 4670  294 GLU  HA   -18.64160   5.76497  -5.23584 1S   312    0.00000
 4671  294 GLU  CB   -19.38177   4.24182  -3.90045 1S   312    1.00000
 4672  294 GLU  HB1  -19.31444   3.13576  -3.81407 1S   312    0.00000
 4673  294 GLU  HB2  -20.42614   4.48868  -4.19946 1S   312    0.00000
 4674  294 GLU  CG   -19.09364   4.86925  -2.52304 1S   312    1.00000
 4675  294 GLU  HG1  -19.08653   5.97622  -2.61189 1S   312    0.00000
 4676  294 GLU  HG2  -18.10247   4.53734  -2.14663 1S   312    0.00000
 4677  294 GLU  CD   -20.16067   4.43904  -1.52028 1S   312    1.00000
 4678  294 GLU  OE1  -20.25748   3.21665  -1.22883 1S   312    1.00000
 4679  294 GLU  OE2  -20.90669   5.32623  -1.03367 1S   312    1.00000
 4680  294 GLU  C    -17.00592   4.59574  -4.61781 1S   312    1.00000
 4681  294 GLU  O    -16.36156   5.59504  -4.31525 1S   312    1.00000
 4682  295 LYS  N    -16.44996   3.36421  -4.65707 1S   313    1.00000
 4683  295 LYS  HN   -17.00322   2.56867  -4.90009 1S   313    0.00000
 4684  295 LYS  CA   -15.06891   3.07695  -4.34036 1S   313    1.00000
 4685  295 LYS  HA   -14.90468   3.41076  -3.32524 1S   313    0.00000
 4686  295 LYS  CB   -14.79978   1.56120  -4.41715 1S   313    1.00000
 4687  295 LYS  HB1  -14.73221   1.23186  -5.47659 1S   313    0.00000
 4688  295 LYS  HB2  -15.68654   1.05901  -3.97112 1S   313    0.00000
 4689  295 LYS  CG   -13.55290   1.08910  -3.65273 1S   313    1.00000
 4690  295 LYS  HG1  -13.66915   1.35484  -2.57862 1S   313    0.00000
 4691  295 LYS  HG2  -12.65713   1.62322  -4.03988 1S   313    0.00000
 4692  295 LYS  CD   -13.31411  -0.42777  -3.77564 1S   313    1.00000
 4693  295 LYS  HD1  -12.41370  -0.68681  -3.17424 1S   313    0.00000
 4694  295 LYS  HD2  -13.09465  -0.66231  -4.84114 1S   313    0.00000
 4695  295 LYS  CE   -14.50339  -1.27959  -3.30015 1S   313    1.00000
 4696  295 LYS  HE1  -15.42232  -1.05044  -3.88020 1S   313    0.00000
 4697  295 LYS  HE2  -14.69674  -1.09294  -2.22257 1S   313    0.00000
 4698  295 LYS  NZ   -14.24230  -2.72704  -3.47457 1S   313    1.00000
 4699  295 LYS  HZ1  -13.28106  -2.95160  -3.14900 1S   313    0.00000
 4700  295 LYS  HZ2  -14.34086  -2.97557  -4.48216 1S   313    0.00000
 4701  295 LYS  HZ3  -14.93454  -3.26890  -2.91900 1S   313    0.00000
 4702  295 LYS  C    -14.10321   3.80744  -5.24886 1S   313    1.00000
 4703  295 LYS  O    -13.08226   4.30721  -4.78361 1S   313    1.00000
 4704  296 PHE  N    -14.43547   3.93029  -6.56132 1S   314    1.00000
 4705  296 PHE  HN   -15.25870   3.48604  -6.91203 1S   314    0.00000
 4706  296 PHE  CA   -13.68625   4.69631  -7.54185 1S   314    1.00000
 4707  296 PHE  HA   -12.68963   4.27832  -7.57790 1S   314    0.00000
 4708  296 PHE  CB   -14.31163   4.59292  -8.97241 1S   314    1.00000
 4709  296 PHE  HB1  -15.40410   4.75372  -8.92481 1S   314    0.00000
 4710  296 PHE  HB2  -14.13958   3.57423  -9.38024 1S   314    0.00000
 4711  296 PHE  CG   -13.74944   5.59761  -9.95343 1S   314    1.00000
 4712  296 PHE  CD1  -12.47075   5.42875 -10.50088 1S   314    1.00000
 4713  296 PHE  HD1  -11.91262   4.53882 -10.26003 1S   314    0.00000
 4714  296 PHE  CE1  -11.91213   6.41154 -11.32967 1S   314    1.00000
 4715  296 PHE  HE1  -10.92187   6.27484 -11.73885 1S   314    0.00000
 4716  296 PHE  CZ   -12.63595   7.57609 -11.61700 1S   314    1.00000
 4717  296 PHE  HZ   -12.21131   8.33780 -12.25336 1S   314    0.00000
 4718  296 PHE  CD2  -14.46658   6.77026 -10.24880 1S   314    1.00000
 4719  296 PHE  HD2  -15.44127   6.92524  -9.81151 1S   314    0.00000
 4720  296 PHE  CE2  -13.91214   7.75487 -11.07151 1S   314    1.00000
 4721  296 PHE  HE2  -14.46813   8.65449 -11.27421 1S   314    0.00000
 4722  296 PHE  C    -13.55377   6.14637  -7.11162 1S   314    1.00000
 4723  296 PHE  O    -12.45191   6.68678  -7.09690 1S   314    1.00000
 4724  297 PHE  N    -14.66782   6.81897  -6.75293 1S   315    1.00000
 4725  297 PHE  HN   -15.56685   6.38444  -6.76270 1S   315    0.00000
 4726  297 PHE  CA   -14.63033   8.22288  -6.39683 1S   315    1.00000
 4727  297 PHE  HA   -14.03898   8.73606  -7.14458 1S   315    0.00000
 4728  297 PHE  CB   -16.03402   8.85947  -6.33396 1S   315    1.00000
 4729  297 PHE  HB1  -15.98842   9.89496  -5.93427 1S   315    0.00000
 4730  297 PHE  HB2  -16.71284   8.25358  -5.69535 1S   315    0.00000
 4731  297 PHE  CG   -16.59422   8.94647  -7.72302 1S   315    1.00000
 4732  297 PHE  CD1  -16.07467   9.86806  -8.64692 1S   315    1.00000
 4733  297 PHE  HD1  -15.26048  10.51608  -8.36957 1S   315    0.00000
 4734  297 PHE  CE1  -16.60401   9.95621  -9.93608 1S   315    1.00000
 4735  297 PHE  HE1  -16.22396  10.69859 -10.61510 1S   315    0.00000
 4736  297 PHE  CZ   -17.60510   9.07073 -10.34236 1S   315    1.00000
 4737  297 PHE  HZ   -17.99306   9.11409 -11.34555 1S   315    0.00000
 4738  297 PHE  CD2  -17.62920   8.09497  -8.12870 1S   315    1.00000
 4739  297 PHE  HD2  -18.04555   7.39578  -7.42286 1S   315    0.00000
 4740  297 PHE  CE2  -18.10045   8.12374  -9.44412 1S   315    1.00000
 4741  297 PHE  HE2  -18.83356   7.40658  -9.76779 1S   315    0.00000
 4742  297 PHE  C    -13.94201   8.44513  -5.07338 1S   315    1.00000
 4743  297 PHE  O    -13.20193   9.41227  -4.91412 1S   315    1.00000
 4744  298 VAL  N    -14.12030   7.52529  -4.09884 1S   316    1.00000
 4745  298 VAL  HN   -14.73035   6.74514  -4.23371 1S   316    0.00000
 4746  298 VAL  CA   -13.46177   7.59313  -2.80869 1S   316    1.00000
 4747  298 VAL  HA   -13.65639   8.57216  -2.40121 1S   316    0.00000
 4748  298 VAL  CB   -14.00963   6.55988  -1.82754 1S   316    1.00000
 4749  298 VAL  HB   -14.01616   5.55552  -2.30737 1S   316    0.00000
 4750  298 VAL  CG1  -13.15943   6.48473  -0.53973 1S   316    1.00000
 4751  298 VAL  HG11 -13.01347   7.50159  -0.11689 1S   316    0.00000
 4752  298 VAL  HG12 -12.16526   6.03458  -0.74322 1S   316    0.00000
 4753  298 VAL  HG13 -13.67030   5.85672   0.21946 1S   316    0.00000
 4754  298 VAL  CG2  -15.45946   6.95666  -1.47712 1S   316    1.00000
 4755  298 VAL  HG21 -16.10369   6.99610  -2.37653 1S   316    0.00000
 4756  298 VAL  HG22 -15.47611   7.95869  -0.99820 1S   316    0.00000
 4757  298 VAL  HG23 -15.89398   6.22066  -0.76837 1S   316    0.00000
 4758  298 VAL  C    -11.95902   7.47777  -2.95871 1S   316    1.00000
 4759  298 VAL  O    -11.21195   8.12016  -2.22150 1S   316    1.00000
 4760  299 SER  N    -11.47587   6.69986  -3.95820 1S   317    1.00000
 4761  299 SER  HN   -12.09505   6.20253  -4.56380 1S   317    0.00000
 4762  299 SER  CA   -10.06277   6.48085  -4.18517 1S   317    1.00000
 4763  299 SER  HA    -9.66120   6.13534  -3.24284 1S   317    0.00000
 4764  299 SER  CB    -9.78313   5.35580  -5.22357 1S   317    1.00000
 4765  299 SER  HB1  -10.43966   4.48489  -5.01377 1S   317    0.00000
 4766  299 SER  HB2   -8.73325   5.02572  -5.10954 1S   317    0.00000
 4767  299 SER  OG    -9.95658   5.75174  -6.58113 1S   317    1.00000
 4768  299 SER  HG1  -10.89577   5.93730  -6.70042 1S   317    0.00000
 4769  299 SER  C     -9.31507   7.74939  -4.55038 1S   317    1.00000
 4770  299 SER  O     -8.12281   7.86393  -4.27478 1S   317    1.00000
 4771  300 VAL  N    -10.01230   8.73787  -5.16434 1S   318    1.00000
 4772  300 VAL  HN   -10.98487   8.64012  -5.36379 1S   318    0.00000
 4773  300 VAL  CA    -9.40780   9.98346  -5.57682 1S   318    1.00000
 4774  300 VAL  HA    -8.33396   9.85710  -5.57645 1S   318    0.00000
 4775  300 VAL  CB    -9.76767  10.38732  -7.00621 1S   318    1.00000
 4776  300 VAL  HB    -9.13244  11.25363  -7.30141 1S   318    0.00000
 4777  300 VAL  CG1   -9.42432   9.21484  -7.95009 1S   318    1.00000
 4778  300 VAL  HG11 -10.11308   8.35941  -7.78722 1S   318    0.00000
 4779  300 VAL  HG12  -8.38311   8.87072  -7.78050 1S   318    0.00000
 4780  300 VAL  HG13  -9.51992   9.53835  -9.00753 1S   318    0.00000
 4781  300 VAL  CG2  -11.24032  10.81168  -7.15514 1S   318    1.00000
 4782  300 VAL  HG21 -11.47404  11.68448  -6.51147 1S   318    0.00000
 4783  300 VAL  HG22 -11.91350   9.97217  -6.89392 1S   318    0.00000
 4784  300 VAL  HG23 -11.44090  11.09837  -8.20959 1S   318    0.00000
 4785  300 VAL  C     -9.70137  11.09273  -4.58329 1S   318    1.00000
 4786  300 VAL  O     -9.33217  12.23868  -4.81071 1S   318    1.00000
 4787  301 GLY  N    -10.33156  10.79651  -3.42233 1S   319    1.00000
 4788  301 GLY  HN   -10.66448   9.87490  -3.22902 1S   319    0.00000
 4789  301 GLY  CA   -10.41442  11.74820  -2.32652 1S   319    1.00000
 4790  301 GLY  HA1   -9.67554  12.52775  -2.45836 1S   319    0.00000
 4791  301 GLY  HA2  -10.25153  11.18737  -1.41904 1S   319    0.00000
 4792  301 GLY  C    -11.75326  12.41666  -2.21796 1S   319    1.00000
 4793  301 GLY  O    -11.90196  13.37913  -1.46687 1S   319    1.00000
 4794  302 LEU  N    -12.76502  11.92579  -2.96435 1S   320    1.00000
 4795  302 LEU  HN   -12.63561  11.12083  -3.53932 1S   320    0.00000
 4796  302 LEU  CA   -14.08493  12.51386  -3.01047 1S   320    1.00000
 4797  302 LEU  HA   -14.02667  13.54975  -2.71158 1S   320    0.00000
 4798  302 LEU  CB   -14.68577  12.38705  -4.42819 1S   320    1.00000
 4799  302 LEU  HB1  -15.77455  12.59202  -4.42419 1S   320    0.00000
 4800  302 LEU  HB2  -14.56240  11.34003  -4.76896 1S   320    0.00000
 4801  302 LEU  CG   -14.02664  13.33048  -5.45413 1S   320    1.00000
 4802  302 LEU  HG   -12.92249  13.20136  -5.37627 1S   320    0.00000
 4803  302 LEU  CD1  -14.43267  12.95432  -6.88601 1S   320    1.00000
 4804  302 LEU  HD11 -15.28969  13.57616  -7.21584 1S   320    0.00000
 4805  302 LEU  HD12 -14.72781  11.88654  -6.92228 1S   320    0.00000
 4806  302 LEU  HD13 -13.59335  13.12039  -7.59193 1S   320    0.00000
 4807  302 LEU  CD2  -14.37388  14.79937  -5.16813 1S   320    1.00000
 4808  302 LEU  HD21 -13.98436  15.12032  -4.18005 1S   320    0.00000
 4809  302 LEU  HD22 -15.47786  14.93325  -5.16956 1S   320    0.00000
 4810  302 LEU  HD23 -13.93884  15.45777  -5.94842 1S   320    0.00000
 4811  302 LEU  C    -14.96234  11.78394  -2.03257 1S   320    1.00000
 4812  302 LEU  O    -14.62498  10.65981  -1.66169 1S   320    1.00000
 4813  303 PRO  N    -16.07931  12.34449  -1.55871 1S   321    1.00000
 4814  303 PRO  CD   -16.60373  13.66849  -1.91068 1S   321    1.00000
 4815  303 PRO  HD1  -16.62710  13.82605  -3.00794 1S   321    0.00000
 4816  303 PRO  HD2  -15.97398  14.44394  -1.42590 1S   321    0.00000
 4817  303 PRO  CA   -16.86626  11.71402  -0.51992 1S   321    1.00000
 4818  303 PRO  HA   -16.22489  11.42247   0.30037 1S   321    0.00000
 4819  303 PRO  CB   -17.90977  12.77545  -0.11910 1S   321    1.00000
 4820  303 PRO  HB1  -17.51362  13.36857   0.73385 1S   321    0.00000
 4821  303 PRO  HB2  -18.89057  12.34638   0.17161 1S   321    0.00000
 4822  303 PRO  CG   -18.02412  13.68782  -1.34148 1S   321    1.00000
 4823  303 PRO  HG1  -18.72923  13.22957  -2.06931 1S   321    0.00000
 4824  303 PRO  HG2  -18.37120  14.70827  -1.08781 1S   321    0.00000
 4825  303 PRO  C    -17.54388  10.48883  -1.06413 1S   321    1.00000
 4826  303 PRO  O    -17.72306  10.34841  -2.27399 1S   321    1.00000
 4827  304 ASN  N    -17.94686   9.59932  -0.14498 1S   322    1.00000
 4828  304 ASN  HN   -17.75296   9.73921   0.82309 1S   322    0.00000
 4829  304 ASN  CA   -18.81445   8.49031  -0.42185 1S   322    1.00000
 4830  304 ASN  HA   -18.49599   8.02564  -1.34543 1S   322    0.00000
 4831  304 ASN  CB   -18.79305   7.41069   0.70474 1S   322    1.00000
 4832  304 ASN  HB1  -17.86628   6.81035   0.57568 1S   322    0.00000
 4833  304 ASN  HB2  -19.65329   6.71836   0.60609 1S   322    0.00000
 4834  304 ASN  CG   -18.78905   7.98665   2.13462 1S   322    1.00000
 4835  304 ASN  OD1  -19.05285   9.16484   2.39272 1S   322    1.00000
 4836  304 ASN  ND2  -18.45713   7.09150   3.11218 1S   322    1.00000
 4837  304 ASN  HD21 -18.40293   7.40165   4.05965 1S   322    0.00000
 4838  304 ASN  HD22 -18.26988   6.13898   2.87507 1S   322    0.00000
 4839  304 ASN  C    -20.20285   9.03247  -0.64029 1S   322    1.00000
 4840  304 ASN  O    -20.47716  10.21681  -0.44726 1S   322    1.00000
 4841  305 MET  N    -21.12827   8.16045  -1.06841 1S   323    1.00000
 4842  305 MET  HN   -20.91841   7.19322  -1.21956 1S   323    0.00000
 4843  305 MET  CA   -22.49890   8.53204  -1.26209 1S   323    1.00000
 4844  305 MET  HA   -22.54649   9.48250  -1.77401 1S   323    0.00000
 4845  305 MET  CB   -23.26368   7.46521  -2.06443 1S   323    1.00000
 4846  305 MET  HB1  -24.33655   7.74067  -2.12240 1S   323    0.00000
 4847  305 MET  HB2  -23.19358   6.49547  -1.52768 1S   323    0.00000
 4848  305 MET  CG   -22.73879   7.25478  -3.49526 1S   323    1.00000
 4849  305 MET  HG1  -23.22272   6.32974  -3.88145 1S   323    0.00000
 4850  305 MET  HG2  -21.64635   7.05186  -3.47346 1S   323    0.00000
 4851  305 MET  SD   -23.12467   8.63148  -4.62479 1S   323    1.00000
 4852  305 MET  CE   -21.55875   9.54406  -4.51437 1S   323    1.00000
 4853  305 MET  HE1  -20.70128   8.89791  -4.79970 1S   323    0.00000
 4854  305 MET  HE2  -21.37212   9.92546  -3.48925 1S   323    0.00000
 4855  305 MET  HE3  -21.57298  10.41948  -5.19824 1S   323    0.00000
 4856  305 MET  C    -23.14545   8.68187   0.08129 1S   323    1.00000
 4857  305 MET  O    -22.72541   8.07225   1.06538 1S   323    1.00000
 4858  306 THR  N    -24.20018   9.52246   0.14350 1S   324    1.00000
 4859  306 THR  HN   -24.50983  10.03164  -0.65504 1S   324    0.00000
 4860  306 THR  CA   -24.95735   9.74127   1.35152 1S   324    1.00000
 4861  306 THR  HA   -24.25307   9.92726   2.15139 1S   324    0.00000
 4862  306 THR  CB   -25.90379  10.94163   1.25658 1S   324    1.00000
 4863  306 THR  HB   -26.39383  11.11021   2.24155 1S   324    0.00000
 4864  306 THR  OG1  -26.91676  10.75706   0.27196 1S   324    1.00000
 4865  306 THR  HG1  -27.46625  11.54446   0.30685 1S   324    0.00000
 4866  306 THR  CG2  -25.10209  12.20348   0.87865 1S   324    1.00000
 4867  306 THR  HG21 -24.71945  12.13579  -0.16209 1S   324    0.00000
 4868  306 THR  HG22 -24.24061  12.34082   1.56463 1S   324    0.00000
 4869  306 THR  HG23 -25.75198  13.10250   0.94646 1S   324    0.00000
 4870  306 THR  C    -25.72554   8.47710   1.67878 1S   324    1.00000
 4871  306 THR  O    -25.89721   7.59837   0.83529 1S   324    1.00000
 4872  307 GLN  N    -26.22352   8.35428   2.92655 1S   325    1.00000
 4873  307 GLN  HN   -26.04422   9.03469   3.63205 1S   325    0.00000
 4874  307 GLN  CA   -27.04977   7.23540   3.32423 1S   325    1.00000
 4875  307 GLN  HA   -26.53936   6.32108   3.05183 1S   325    0.00000
 4876  307 GLN  CB   -27.30486   7.24234   4.84736 1S   325    1.00000
 4877  307 GLN  HB1  -27.76352   8.21465   5.13348 1S   325    0.00000
 4878  307 GLN  HB2  -26.31786   7.17016   5.35820 1S   325    0.00000
 4879  307 GLN  CG   -28.20090   6.08892   5.33591 1S   325    1.00000
 4880  307 GLN  HG1  -27.73138   5.11500   5.08150 1S   325    0.00000
 4881  307 GLN  HG2  -29.19393   6.14345   4.84237 1S   325    0.00000
 4882  307 GLN  CD   -28.40735   6.17349   6.85026 1S   325    1.00000
 4883  307 GLN  OE1  -27.82949   7.02066   7.53833 1S   325    1.00000
 4884  307 GLN  NE2  -29.26692   5.25212   7.37760 1S   325    1.00000
 4885  307 GLN  HE21 -29.82936   4.69385   6.75891 1S   325    0.00000
 4886  307 GLN  HE22 -29.39559   5.20180   8.36340 1S   325    0.00000
 4887  307 GLN  C    -28.37033   7.28256   2.58985 1S   325    1.00000
 4888  307 GLN  O    -28.90555   6.24935   2.19248 1S   325    1.00000
 4889  308 GLY  N    -28.88546   8.51304   2.34697 1S   326    1.00000
 4890  308 GLY  HN   -28.41162   9.32723   2.67128 1S   326    0.00000
 4891  308 GLY  CA   -30.10921   8.75922   1.62110 1S   326    1.00000
 4892  308 GLY  HA1  -30.27805   9.82514   1.63176 1S   326    0.00000
 4893  308 GLY  HA2  -30.89574   8.19823   2.10712 1S   326    0.00000
 4894  308 GLY  C    -30.03011   8.31409   0.18936 1S   326    1.00000
 4895  308 GLY  O    -31.01938   7.84693  -0.35875 1S   326    1.00000
 4896  309 PHE  N    -28.84192   8.40587  -0.45422 1S   327    1.00000
 4897  309 PHE  HN   -28.05357   8.83365  -0.01616 1S   327    0.00000
 4898  309 PHE  CA   -28.59786   7.87670  -1.78128 1S   327    1.00000
 4899  309 PHE  HA   -29.28504   8.36480  -2.45838 1S   327    0.00000
 4900  309 PHE  CB   -27.14096   8.17223  -2.24247 1S   327    1.00000
 4901  309 PHE  HB1  -26.42601   7.83150  -1.46951 1S   327    0.00000
 4902  309 PHE  HB2  -27.01140   9.26932  -2.36781 1S   327    0.00000
 4903  309 PHE  CG   -26.76276   7.49745  -3.53759 1S   327    1.00000
 4904  309 PHE  CD1  -26.20611   6.20319  -3.52439 1S   327    1.00000
 4905  309 PHE  HD1  -26.02613   5.70636  -2.58273 1S   327    0.00000
 4906  309 PHE  CE1  -25.88920   5.54761  -4.71757 1S   327    1.00000
 4907  309 PHE  HE1  -25.46933   4.55272  -4.69302 1S   327    0.00000
 4908  309 PHE  CZ   -26.10946   6.18991  -5.94017 1S   327    1.00000
 4909  309 PHE  HZ   -25.86292   5.68826  -6.86370 1S   327    0.00000
 4910  309 PHE  CD2  -26.97417   8.13381  -4.76727 1S   327    1.00000
 4911  309 PHE  HD2  -27.39726   9.12719  -4.79655 1S   327    0.00000
 4912  309 PHE  CE2  -26.64227   7.48478  -5.96006 1S   327    1.00000
 4913  309 PHE  HE2  -26.80124   7.99145  -6.89312 1S   327    0.00000
 4914  309 PHE  C    -28.89839   6.39197  -1.81968 1S   327    1.00000
 4915  309 PHE  O    -29.67623   5.94332  -2.65313 1S   327    1.00000
 4916  310 TRP  N    -28.31437   5.59142  -0.90419 1S   328    1.00000
 4917  310 TRP  HN   -27.70089   5.95577  -0.20692 1S   328    0.00000
 4918  310 TRP  CA   -28.50094   4.15548  -0.90934 1S   328    1.00000
 4919  310 TRP  HA   -28.30977   3.80615  -1.91543 1S   328    0.00000
 4920  310 TRP  CB   -27.52351   3.44513   0.05453 1S   328    1.00000
 4921  310 TRP  HB1  -27.74595   2.35566   0.06998 1S   328    0.00000
 4922  310 TRP  HB2  -27.66119   3.84670   1.08273 1S   328    0.00000
 4923  310 TRP  CG   -26.07191   3.60403  -0.35133 1S   328    1.00000
 4924  310 TRP  CD1  -25.08489   4.34954   0.23263 1S   328    1.00000
 4925  310 TRP  HD1  -25.21304   4.95285   1.11956 1S   328    0.00000
 4926  310 TRP  NE1  -23.91375   4.23240  -0.47929 1S   328    1.00000
 4927  310 TRP  HE1  -23.06736   4.68876  -0.28526 1S   328    0.00000
 4928  310 TRP  CE2  -24.13722   3.41600  -1.56162 1S   328    1.00000
 4929  310 TRP  CD2  -25.47966   2.98281  -1.51108 1S   328    1.00000
 4930  310 TRP  CE3  -25.99927   2.12085  -2.47406 1S   328    1.00000
 4931  310 TRP  HE3  -27.02204   1.77967  -2.45656 1S   328    0.00000
 4932  310 TRP  CZ3  -25.13747   1.67458  -3.48745 1S   328    1.00000
 4933  310 TRP  HZ3  -25.50072   0.98763  -4.23754 1S   328    0.00000
 4934  310 TRP  CZ2  -23.29930   2.99987  -2.58756 1S   328    1.00000
 4935  310 TRP  HZ2  -22.27792   3.32735  -2.66697 1S   328    0.00000
 4936  310 TRP  CH2  -23.80874   2.11128  -3.53493 1S   328    1.00000
 4937  310 TRP  HH2  -23.15880   1.74797  -4.30821 1S   328    0.00000
 4938  310 TRP  C    -29.91853   3.75694  -0.56025 1S   328    1.00000
 4939  310 TRP  O    -30.42440   2.75688  -1.06445 1S   328    1.00000
 4940  311 GLU  N    -30.59966   4.55307   0.29126 1S   329    1.00000
 4941  311 GLU  HN   -30.16767   5.36101   0.68872 1S   329    0.00000
 4942  311 GLU  CA   -31.95390   4.29862   0.72607 1S   329    1.00000
 4943  311 GLU  HA   -32.04810   3.24396   0.94549 1S   329    0.00000
 4944  311 GLU  CB   -32.26692   5.10341   2.01225 1S   329    1.00000
 4945  311 GLU  HB1  -33.30313   5.50764   2.01478 1S   329    0.00000
 4946  311 GLU  HB2  -31.57396   5.97288   2.03856 1S   329    0.00000
 4947  311 GLU  CG   -32.09442   4.23993   3.27794 1S   329    1.00000
 4948  311 GLU  HG1  -31.27013   3.51256   3.11482 1S   329    0.00000
 4949  311 GLU  HG2  -33.02945   3.66988   3.46790 1S   329    0.00000
 4950  311 GLU  CD   -31.75506   5.06663   4.51705 1S   329    1.00000
 4951  311 GLU  OE1  -31.34502   4.43140   5.52582 1S   329    1.00000
 4952  311 GLU  OE2  -31.88007   6.31887   4.48137 1S   329    1.00000
 4953  311 GLU  C    -32.97682   4.62709  -0.33578 1S   329    1.00000
 4954  311 GLU  O    -33.94296   3.88624  -0.50622 1S   329    1.00000
 4955  312 ASN  N    -32.80700   5.76123  -1.04987 1S   330    1.00000
 4956  312 ASN  HN   -31.98375   6.31743  -0.94321 1S   330    0.00000
 4957  312 ASN  CA   -33.87096   6.36159  -1.82591 1S   330    1.00000
 4958  312 ASN  HA   -34.81071   5.88370  -1.58168 1S   330    0.00000
 4959  312 ASN  CB   -34.00653   7.87416  -1.54475 1S   330    1.00000
 4960  312 ASN  HB1  -34.83555   8.29130  -2.15106 1S   330    0.00000
 4961  312 ASN  HB2  -33.06593   8.40078  -1.81134 1S   330    0.00000
 4962  312 ASN  CG   -34.35130   8.09940  -0.06882 1S   330    1.00000
 4963  312 ASN  OD1  -35.22344   7.42129   0.48411 1S   330    1.00000
 4964  312 ASN  ND2  -33.65695   9.08158   0.57608 1S   330    1.00000
 4965  312 ASN  HD21 -33.81319   9.23177   1.55013 1S   330    0.00000
 4966  312 ASN  HD22 -32.97320   9.61601   0.07910 1S   330    0.00000
 4967  312 ASN  C    -33.68283   6.20615  -3.30927 1S   330    1.00000
 4968  312 ASN  O    -34.63092   6.42185  -4.06217 1S   330    1.00000
 4969  313 SER  N    -32.47526   5.82266  -3.78521 1S   331    1.00000
 4970  313 SER  HN   -31.70049   5.65604  -3.17812 1S   331    0.00000
 4971  313 SER  CA   -32.23473   5.61224  -5.19936 1S   331    1.00000
 4972  313 SER  HA   -32.61378   6.46752  -5.74346 1S   331    0.00000
 4973  313 SER  CB   -30.74200   5.40836  -5.54226 1S   331    1.00000
 4974  313 SER  HB1  -30.61234   5.15709  -6.61292 1S   331    0.00000
 4975  313 SER  HB2  -30.31434   4.57877  -4.93891 1S   331    0.00000
 4976  313 SER  OG   -29.99927   6.59090  -5.29123 1S   331    1.00000
 4977  313 SER  HG1  -29.76831   6.55569  -4.35539 1S   331    0.00000
 4978  313 SER  C    -32.95653   4.37698  -5.67306 1S   331    1.00000
 4979  313 SER  O    -33.25600   3.47804  -4.88950 1S   331    1.00000
 4980  314 MET  N    -33.25121   4.31619  -6.98825 1S   332    1.00000
 4981  314 MET  HN   -33.02531   5.06609  -7.60742 1S   332    0.00000
 4982  314 MET  CA   -33.79775   3.13799  -7.61014 1S   332    1.00000
 4983  314 MET  HA   -33.97779   2.36419  -6.87641 1S   332    0.00000
 4984  314 MET  CB   -35.11309   3.41472  -8.36665 1S   332    1.00000
 4985  314 MET  HB1  -34.99739   4.30830  -9.01768 1S   332    0.00000
 4986  314 MET  HB2  -35.88220   3.66044  -7.60223 1S   332    0.00000
 4987  314 MET  CG   -35.58601   2.22519  -9.22194 1S   332    1.00000
 4988  314 MET  HG1  -35.49285   1.29680  -8.61643 1S   332    0.00000
 4989  314 MET  HG2  -34.89458   2.11854 -10.08704 1S   332    0.00000
 4990  314 MET  SD   -37.28335   2.36823  -9.84213 1S   332    1.00000
 4991  314 MET  CE   -38.08673   2.16195  -8.22500 1S   332    1.00000
 4992  314 MET  HE1  -37.95215   3.06153  -7.58827 1S   332    0.00000
 4993  314 MET  HE2  -37.67292   1.28720  -7.67899 1S   332    0.00000
 4994  314 MET  HE3  -39.17896   2.00027  -8.35056 1S   332    0.00000
 4995  314 MET  C    -32.74056   2.65451  -8.55302 1S   332    1.00000
 4996  314 MET  O    -32.47894   3.27971  -9.57599 1S   332    1.00000
 4997  315 LEU  N    -32.07987   1.53056  -8.19859 1S   333    1.00000
 4998  315 LEU  HN   -32.31685   1.03043  -7.37005 1S   333    0.00000
 4999  315 LEU  CA   -30.91294   1.05939  -8.90592 1S   333    1.00000
 5000  315 LEU  HA   -30.59715   1.80168  -9.62633 1S   333    0.00000
 5001  315 LEU  CB   -29.72506   0.77440  -7.96152 1S   333    1.00000
 5002  315 LEU  HB1  -28.83964   0.48066  -8.56960 1S   333    0.00000
 5003  315 LEU  HB2  -29.98159  -0.08146  -7.29842 1S   333    0.00000
 5004  315 LEU  CG   -29.30923   1.96601  -7.06635 1S   333    1.00000
 5005  315 LEU  HG   -30.17403   2.22397  -6.41163 1S   333    0.00000
 5006  315 LEU  CD1  -28.14785   1.54514  -6.14875 1S   333    1.00000
 5007  315 LEU  HD11 -27.26297   1.26758  -6.75921 1S   333    0.00000
 5008  315 LEU  HD12 -28.44100   0.66725  -5.53484 1S   333    0.00000
 5009  315 LEU  HD13 -27.86589   2.37741  -5.47040 1S   333    0.00000
 5010  315 LEU  CD2  -28.93942   3.23064  -7.86746 1S   333    1.00000
 5011  315 LEU  HD21 -29.80657   3.60270  -8.45222 1S   333    0.00000
 5012  315 LEU  HD22 -28.10424   3.01681  -8.56482 1S   333    0.00000
 5013  315 LEU  HD23 -28.61886   4.03877  -7.17633 1S   333    0.00000
 5014  315 LEU  C    -31.19778  -0.19984  -9.67747 1S   333    1.00000
 5015  315 LEU  O    -30.34898  -0.63257 -10.44789 1S   333    1.00000
 5016  316 THR  N    -32.38649  -0.82221  -9.52646 1S   334    1.00000
 5017  316 THR  HN   -33.07690  -0.49927  -8.88436 1S   334    0.00000
 5018  316 THR  CA   -32.77855  -1.93710 -10.36662 1S   334    1.00000
 5019  316 THR  HA   -32.12548  -2.00575 -11.22594 1S   334    0.00000
 5020  316 THR  CB   -32.80478  -3.29572  -9.66553 1S   334    1.00000
 5021  316 THR  HB   -33.20001  -4.07894 -10.35200 1S   334    0.00000
 5022  316 THR  OG1  -33.60795  -3.27840  -8.48910 1S   334    1.00000
 5023  316 THR  HG1  -34.51936  -3.23002  -8.78972 1S   334    0.00000
 5024  316 THR  CG2  -31.36794  -3.68990  -9.27995 1S   334    1.00000
 5025  316 THR  HG21 -30.93368  -2.95129  -8.57338 1S   334    0.00000
 5026  316 THR  HG22 -30.72957  -3.73200 -10.18752 1S   334    0.00000
 5027  316 THR  HG23 -31.35353  -4.68795  -8.79319 1S   334    0.00000
 5028  316 THR  C    -34.14819  -1.61695 -10.88856 1S   334    1.00000
 5029  316 THR  O    -34.86466  -0.80236 -10.30926 1S   334    1.00000
 5030  317 ASP  N    -34.55375  -2.29699 -11.99181 1S   335    1.00000
 5031  317 ASP  HN   -33.93103  -2.91065 -12.46842 1S   335    0.00000
 5032  317 ASP  CA   -35.89083  -2.24757 -12.54774 1S   335    1.00000
 5033  317 ASP  HA   -36.07226  -1.22019 -12.82398 1S   335    0.00000
 5034  317 ASP  CB   -35.99113  -3.16733 -13.80092 1S   335    1.00000
 5035  317 ASP  HB1  -35.94829  -4.23419 -13.49852 1S   335    0.00000
 5036  317 ASP  HB2  -35.11335  -2.97176 -14.45121 1S   335    0.00000
 5037  317 ASP  CG   -37.25588  -2.93673 -14.63431 1S   335    1.00000
 5038  317 ASP  OD1  -38.37603  -3.07518 -14.08100 1S   335    1.00000
 5039  317 ASP  OD2  -37.10648  -2.64391 -15.85004 1S   335    1.00000
 5040  317 ASP  C    -36.85601  -2.73527 -11.47511 1S   335    1.00000
 5041  317 ASP  O    -36.59417  -3.80440 -10.92234 1S   335    1.00000
 5042  318 PRO  N    -37.91582  -2.01585 -11.09996 1S   336    1.00000
 5043  318 PRO  CD   -38.32637  -0.75776 -11.73357 1S   336    1.00000
 5044  318 PRO  HD1  -38.48634  -0.88937 -12.82462 1S   336    0.00000
 5045  318 PRO  HD2  -37.54138   0.00735 -11.55072 1S   336    0.00000
 5046  318 PRO  CA   -38.67736  -2.28746  -9.88479 1S   336    1.00000
 5047  318 PRO  HA   -38.01215  -2.54906  -9.07408 1S   336    0.00000
 5048  318 PRO  CB   -39.39674  -0.95887  -9.63273 1S   336    1.00000
 5049  318 PRO  HB1  -38.70467  -0.29518  -9.07422 1S   336    0.00000
 5050  318 PRO  HB2  -40.32376  -1.05150  -9.04238 1S   336    0.00000
 5051  318 PRO  CG   -39.62087  -0.37368 -11.02565 1S   336    1.00000
 5052  318 PRO  HG1  -40.48008  -0.87690 -11.52083 1S   336    0.00000
 5053  318 PRO  HG2  -39.79461   0.71925 -10.99499 1S   336    0.00000
 5054  318 PRO  C    -39.68246  -3.40556 -10.06533 1S   336    1.00000
 5055  318 PRO  O    -40.75683  -3.35127  -9.46846 1S   336    1.00000
 5056  319 GLY  N    -39.36562  -4.43934 -10.86945 1S   337    1.00000
 5057  319 GLY  HN   -38.47525  -4.47514 -11.32045 1S   337    0.00000
 5058  319 GLY  CA   -40.26316  -5.53008 -11.13610 1S   337    1.00000
 5059  319 GLY  HA1  -40.79864  -5.78668 -10.23246 1S   337    0.00000
 5060  319 GLY  HA2  -39.66468  -6.33910 -11.52868 1S   337    0.00000
 5061  319 GLY  C    -41.23539  -5.11061 -12.19440 1S   337    1.00000
 5062  319 GLY  O    -41.07760  -4.07266 -12.83425 1S   337    1.00000
 5063  320 ASN  N    -42.27344  -5.94224 -12.41231 1S   338    1.00000
 5064  320 ASN  HN   -42.40572  -6.76113 -11.86078 1S   338    0.00000
 5065  320 ASN  CA   -43.15948  -5.78405 -13.53918 1S   338    1.00000
 5066  320 ASN  HA   -42.68551  -5.12573 -14.25596 1S   338    0.00000
 5067  320 ASN  CB   -43.41966  -7.15527 -14.21287 1S   338    1.00000
 5068  320 ASN  HB1  -44.10088  -7.77135 -13.59082 1S   338    0.00000
 5069  320 ASN  HB2  -42.44819  -7.69054 -14.29949 1S   338    0.00000
 5070  320 ASN  CG   -43.97850  -6.98931 -15.63286 1S   338    1.00000
 5071  320 ASN  OD1  -43.83739  -5.93902 -16.26477 1S   338    1.00000
 5072  320 ASN  ND2  -44.61789  -8.07529 -16.15435 1S   338    1.00000
 5073  320 ASN  HD21 -45.01264  -8.01376 -17.06773 1S   338    0.00000
 5074  320 ASN  HD22 -44.67232  -8.92330 -15.62765 1S   338    0.00000
 5075  320 ASN  C    -44.46694  -5.14514 -13.13151 1S   338    1.00000
 5076  320 ASN  O    -45.17723  -4.61691 -13.98491 1S   338    1.00000
 5077  321 VAL  N    -44.82351  -5.15643 -11.82078 1S   339    1.00000
 5078  321 VAL  HN   -44.24726  -5.58764 -11.13203 1S   339    0.00000
 5079  321 VAL  CA   -46.05649  -4.56296 -11.32832 1S   339    1.00000
 5080  321 VAL  HA   -46.87177  -4.99968 -11.88871 1S   339    0.00000
 5081  321 VAL  CB   -46.29830  -4.82770  -9.84209 1S   339    1.00000
 5082  321 VAL  HB   -45.44591  -4.43907  -9.24063 1S   339    0.00000
 5083  321 VAL  CG1  -47.59436  -4.12888  -9.36986 1S   339    1.00000
 5084  321 VAL  HG11 -48.44196  -4.39509 -10.03606 1S   339    0.00000
 5085  321 VAL  HG12 -47.47667  -3.02522  -9.36503 1S   339    0.00000
 5086  321 VAL  HG13 -47.84531  -4.44932  -8.33669 1S   339    0.00000
 5087  321 VAL  CG2  -46.39160  -6.35160  -9.61290 1S   339    1.00000
 5088  321 VAL  HG21 -45.44875  -6.86242  -9.89591 1S   339    0.00000
 5089  321 VAL  HG22 -47.22486  -6.78034 -10.20902 1S   339    0.00000
 5090  321 VAL  HG23 -46.58854  -6.56000  -8.53937 1S   339    0.00000
 5091  321 VAL  C    -46.05093  -3.07425 -11.60762 1S   339    1.00000
 5092  321 VAL  O    -46.90660  -2.56846 -12.33257 1S   339    1.00000
 5093  322 GLN  N    -45.04892  -2.35201 -11.06520 1S   340    1.00000
 5094  322 GLN  HN   -44.35372  -2.77747 -10.49211 1S   340    0.00000
 5095  322 GLN  CA   -44.87660  -0.94275 -11.31003 1S   340    1.00000
 5096  322 GLN  HA   -45.82757  -0.50086 -11.57545 1S   340    0.00000
 5097  322 GLN  CB   -44.33489  -0.19629 -10.07161 1S   340    1.00000
 5098  322 GLN  HB1  -45.15841  -0.12168  -9.32639 1S   340    0.00000
 5099  322 GLN  HB2  -44.05869   0.84014 -10.36671 1S   340    0.00000
 5100  322 GLN  CG   -43.14510  -0.90696  -9.39882 1S   340    1.00000
 5101  322 GLN  HG1  -42.31810  -1.03869 -10.12484 1S   340    0.00000
 5102  322 GLN  HG2  -43.45074  -1.91339  -9.04024 1S   340    0.00000
 5103  322 GLN  CD   -42.63157  -0.12091  -8.18872 1S   340    1.00000
 5104  322 GLN  OE1  -42.43498  -0.68577  -7.10813 1S   340    1.00000
 5105  322 GLN  NE2  -42.38653   1.20597  -8.38337 1S   340    1.00000
 5106  322 GLN  HE21 -42.49401   1.60695  -9.29512 1S   340    0.00000
 5107  322 GLN  HE22 -42.06800   1.76696  -7.62418 1S   340    0.00000
 5108  322 GLN  C    -43.93125  -0.75321 -12.46752 1S   340    1.00000
 5109  322 GLN  O    -42.94191  -1.46964 -12.61300 1S   340    1.00000
 5110  323 LYS  N    -44.24487   0.23544 -13.33502 1S   341    1.00000
 5111  323 LYS  HN   -45.06525   0.78757 -13.21322 1S   341    0.00000
 5112  323 LYS  CA   -43.43845   0.56801 -14.48456 1S   341    1.00000
 5113  323 LYS  HA   -42.73251  -0.22661 -14.68145 1S   341    0.00000
 5114  323 LYS  CB   -44.28683   0.83329 -15.75097 1S   341    1.00000
 5115  323 LYS  HB1  -43.60866   1.09464 -16.59387 1S   341    0.00000
 5116  323 LYS  HB2  -44.96460   1.69846 -15.57776 1S   341    0.00000
 5117  323 LYS  CG   -45.14683  -0.36821 -16.18619 1S   341    1.00000
 5118  323 LYS  HG1  -45.52419  -0.15951 -17.21121 1S   341    0.00000
 5119  323 LYS  HG2  -46.03115  -0.45728 -15.51643 1S   341    0.00000
 5120  323 LYS  CD   -44.38985  -1.70752 -16.16881 1S   341    1.00000
 5121  323 LYS  HD1  -44.37777  -2.08638 -15.12086 1S   341    0.00000
 5122  323 LYS  HD2  -43.33212  -1.54515 -16.47431 1S   341    0.00000
 5123  323 LYS  CE   -45.00572  -2.78520 -17.06166 1S   341    1.00000
 5124  323 LYS  HE1  -46.10235  -2.85623 -16.91009 1S   341    0.00000
 5125  323 LYS  HE2  -44.54029  -3.76411 -16.83696 1S   341    0.00000
 5126  323 LYS  NZ   -44.74233  -2.49099 -18.48805 1S   341    1.00000
 5127  323 LYS  HZ1  -43.71368  -2.45314 -18.64064 1S   341    0.00000
 5128  323 LYS  HZ2  -45.16249  -1.57327 -18.73660 1S   341    0.00000
 5129  323 LYS  HZ3  -45.15300  -3.23940 -19.08124 1S   341    0.00000
 5130  323 LYS  C    -42.64399   1.79518 -14.15293 1S   341    1.00000
 5131  323 LYS  O    -43.09297   2.63984 -13.38388 1S   341    1.00000
 5132  324 ALA  N    -41.42043   1.90079 -14.71518 1S   342    1.00000
 5133  324 ALA  HN   -41.07109   1.21150 -15.34518 1S   342    0.00000
 5134  324 ALA  CA   -40.51527   2.98156 -14.41746 1S   342    1.00000
 5135  324 ALA  HA   -41.05577   3.81148 -13.98174 1S   342    0.00000
 5136  324 ALA  CB   -39.39156   2.54052 -13.46068 1S   342    1.00000
 5137  324 ALA  HB1  -38.82424   1.68404 -13.88464 1S   342    0.00000
 5138  324 ALA  HB2  -39.83977   2.21947 -12.49739 1S   342    0.00000
 5139  324 ALA  HB3  -38.68657   3.37205 -13.25043 1S   342    0.00000
 5140  324 ALA  C    -39.89944   3.45672 -15.70233 1S   342    1.00000
 5141  324 ALA  O    -39.85860   2.73428 -16.69752 1S   342    1.00000
 5142  325 VAL  N    -39.40256   4.71532 -15.69185 1S   343    1.00000
 5143  325 VAL  HN   -39.46251   5.27609 -14.86633 1S   343    0.00000
 5144  325 VAL  CA   -38.72666   5.34305 -16.80396 1S   343    1.00000
 5145  325 VAL  HA   -39.06382   4.89474 -17.72875 1S   343    0.00000
 5146  325 VAL  CB   -38.97198   6.84771 -16.85809 1S   343    1.00000
 5147  325 VAL  HB   -38.66749   7.31332 -15.89277 1S   343    0.00000
 5148  325 VAL  CG1  -38.15906   7.49661 -17.99763 1S   343    1.00000
 5149  325 VAL  HG11 -38.33476   6.96162 -18.95416 1S   343    0.00000
 5150  325 VAL  HG12 -37.07327   7.48417 -17.76835 1S   343    0.00000
 5151  325 VAL  HG13 -38.47037   8.55588 -18.12277 1S   343    0.00000
 5152  325 VAL  CG2  -40.48107   7.10527 -17.04839 1S   343    1.00000
 5153  325 VAL  HG21 -41.06083   6.71657 -16.18617 1S   343    0.00000
 5154  325 VAL  HG22 -40.84317   6.61779 -17.97836 1S   343    0.00000
 5155  325 VAL  HG23 -40.67644   8.19590 -17.12465 1S   343    0.00000
 5156  325 VAL  C    -37.25987   5.04609 -16.61340 1S   343    1.00000
 5157  325 VAL  O    -36.59818   5.63610 -15.76223 1S   343    1.00000
 5158  326 CYS  N    -36.73223   4.07657 -17.39663 1S   344    1.00000
 5159  326 CYS  HN   -37.27450   3.65666 -18.11968 1S   344    0.00000
 5160  326 CYS  CA   -35.45928   3.43895 -17.13364 1S   344    1.00000
 5161  326 CYS  HA   -35.29232   3.43603 -16.06492 1S   344    0.00000
 5162  326 CYS  CB   -35.45016   1.97344 -17.64478 1S   344    1.00000
 5163  326 CYS  HB1  -34.41296   1.58103 -17.70117 1S   344    0.00000
 5164  326 CYS  HB2  -35.86550   1.95039 -18.67546 1S   344    0.00000
 5165  326 CYS  SG   -36.37795   0.82878 -16.57558 1S   344    1.00000
 5166  326 CYS  C    -34.27819   4.14812 -17.75084 1S   344    1.00000
 5167  326 CYS  O    -33.16096   3.63872 -17.66718 1S   344    1.00000
 5168  327 HSD  N    -34.45801   5.35277 -18.35004 1S   345    1.00000
 5169  327 HSD  HN   -35.36056   5.76755 -18.42776 1S   345    0.00000
 5170  327 HSD  CA   -33.34464   6.12425 -18.86915 1S   345    1.00000
 5171  327 HSD  HA   -32.81794   5.47900 -19.55111 1S   345    0.00000
 5172  327 HSD  CB   -33.79123   7.36142 -19.68502 1S   345    1.00000
 5173  327 HSD  HB1  -34.41958   8.02467 -19.05168 1S   345    0.00000
 5174  327 HSD  HB2  -34.42159   7.01136 -20.53116 1S   345    0.00000
 5175  327 HSD  ND1  -32.10102   9.27109 -19.66309 1S   345    1.00000
 5176  327 HSD  HD1  -32.39214   9.67089 -18.79249 1S   345    0.00000
 5177  327 HSD  CG   -32.64993   8.15929 -20.26698 1S   345    1.00000
 5178  327 HSD  CE1  -31.09188   9.69540 -20.46270 1S   345    1.00000
 5179  327 HSD  HE1  -30.48149  10.56688 -20.23019 1S   345    0.00000
 5180  327 HSD  NE2  -30.95080   8.93603 -21.53190 1S   345    1.00000
 5181  327 HSD  CD2  -31.93146   7.96754 -21.40773 1S   345    1.00000
 5182  327 HSD  HD2  -32.02531   7.19868 -22.16385 1S   345    0.00000
 5183  327 HSD  C    -32.46203   6.57085 -17.70728 1S   345    1.00000
 5184  327 HSD  O    -33.01043   7.12822 -16.75553 1S   345    1.00000
 5185  328 PRO  N    -31.14187   6.33841 -17.68687 1S   346    1.00000
 5186  328 PRO  CD   -30.40184   5.58669 -18.70450 1S   346    1.00000
 5187  328 PRO  HD1  -30.01252   6.30893 -19.45404 1S   346    0.00000
 5188  328 PRO  HD2  -31.01185   4.80058 -19.19702 1S   346    0.00000
 5189  328 PRO  CA   -30.32875   6.55413 -16.49861 1S   346    1.00000
 5190  328 PRO  HA   -30.80954   6.06670 -15.66311 1S   346    0.00000
 5191  328 PRO  CB   -28.96892   5.92258 -16.82191 1S   346    1.00000
 5192  328 PRO  HB1  -28.55724   5.40721 -15.93719 1S   346    0.00000
 5193  328 PRO  HB2  -28.23363   6.67291 -17.18652 1S   346    0.00000
 5194  328 PRO  CG   -29.25896   4.92500 -17.94250 1S   346    1.00000
 5195  328 PRO  HG1  -28.37437   4.73390 -18.58097 1S   346    0.00000
 5196  328 PRO  HG2  -29.61734   3.96654 -17.50697 1S   346    0.00000
 5197  328 PRO  C    -30.16616   8.02213 -16.20353 1S   346    1.00000
 5198  328 PRO  O    -29.78836   8.76764 -17.10627 1S   346    1.00000
 5199  329 THR  N    -30.47675   8.45481 -14.96306 1S   347    1.00000
 5200  329 THR  HN   -30.75524   7.82314 -14.24039 1S   347    0.00000
 5201  329 THR  CA   -30.52304   9.85926 -14.63010 1S   347    1.00000
 5202  329 THR  HA   -29.85443  10.40576 -15.28182 1S   347    0.00000
 5203  329 THR  CB   -31.92833  10.44980 -14.73801 1S   347    1.00000
 5204  329 THR  HB   -31.96206  11.45603 -14.26074 1S   347    0.00000
 5205  329 THR  OG1  -32.89100   9.61065 -14.11275 1S   347    1.00000
 5206  329 THR  HG1  -32.87850   8.78683 -14.60767 1S   347    0.00000
 5207  329 THR  CG2  -32.34262  10.60845 -16.21314 1S   347    1.00000
 5208  329 THR  HG21 -32.40517   9.61853 -16.71031 1S   347    0.00000
 5209  329 THR  HG22 -31.60630  11.23182 -16.76100 1S   347    0.00000
 5210  329 THR  HG23 -33.34094  11.09058 -16.28166 1S   347    0.00000
 5211  329 THR  C    -30.00207  10.03554 -13.22617 1S   347    1.00000
 5212  329 THR  O    -30.24915   9.21260 -12.34666 1S   347    1.00000
 5213  330 ALA  N    -29.26008  11.14428 -13.00290 1S   348    1.00000
 5214  330 ALA  HN   -29.02368  11.75664 -13.75268 1S   348    0.00000
 5215  330 ALA  CA   -28.75769  11.55414 -11.71566 1S   348    1.00000
 5216  330 ALA  HA   -28.84049  10.74285 -11.00473 1S   348    0.00000
 5217  330 ALA  CB   -27.29351  12.00758 -11.80542 1S   348    1.00000
 5218  330 ALA  HB1  -27.18518  12.83738 -12.53632 1S   348    0.00000
 5219  330 ALA  HB2  -26.65926  11.16194 -12.14844 1S   348    0.00000
 5220  330 ALA  HB3  -26.91391  12.35413 -10.82251 1S   348    0.00000
 5221  330 ALA  C    -29.59894  12.71585 -11.25198 1S   348    1.00000
 5222  330 ALA  O    -29.75339  13.70783 -11.96152 1S   348    1.00000
 5223  331 TRP  N    -30.18929  12.58994 -10.04596 1S   349    1.00000
 5224  331 TRP  HN   -30.01528  11.78588  -9.47725 1S   349    0.00000
 5225  331 TRP  CA   -31.16701  13.50000  -9.50343 1S   349    1.00000
 5226  331 TRP  HA   -31.47426  14.20769 -10.26176 1S   349    0.00000
 5227  331 TRP  CB   -32.41861  12.76492  -8.95335 1S   349    1.00000
 5228  331 TRP  HB1  -33.05905  13.47470  -8.38863 1S   349    0.00000
 5229  331 TRP  HB2  -32.08652  11.96934  -8.25335 1S   349    0.00000
 5230  331 TRP  CG   -33.26353  12.10908 -10.02544 1S   349    1.00000
 5231  331 TRP  CD1  -32.90854  11.12220 -10.89993 1S   349    1.00000
 5232  331 TRP  HD1  -31.94763  10.63237 -10.92296 1S   349    0.00000
 5233  331 TRP  NE1  -33.94987  10.83750 -11.74014 1S   349    1.00000
 5234  331 TRP  HE1  -33.89372  10.24181 -12.52102 1S   349    0.00000
 5235  331 TRP  CE2  -35.01478  11.63079 -11.42338 1S   349    1.00000
 5236  331 TRP  CD2  -34.63122  12.44966 -10.33389 1S   349    1.00000
 5237  331 TRP  CE3  -35.51672  13.36207  -9.77319 1S   349    1.00000
 5238  331 TRP  HE3  -35.25080  13.98837  -8.93545 1S   349    0.00000
 5239  331 TRP  CZ3  -36.80608  13.44180 -10.32217 1S   349    1.00000
 5240  331 TRP  HZ3  -37.51839  14.13495  -9.90511 1S   349    0.00000
 5241  331 TRP  CZ2  -36.28514  11.72311 -11.97173 1S   349    1.00000
 5242  331 TRP  HZ2  -36.58832  11.11013 -12.80938 1S   349    0.00000
 5243  331 TRP  CH2  -37.18007  12.63139 -11.40542 1S   349    1.00000
 5244  331 TRP  HH2  -38.17831  12.69418 -11.80712 1S   349    0.00000
 5245  331 TRP  C    -30.55126  14.25519  -8.36167 1S   349    1.00000
 5246  331 TRP  O    -30.02748  13.66744  -7.41769 1S   349    1.00000
 5247  332 ASP  N    -30.64071  15.59946  -8.43241 1S   350    1.00000
 5248  332 ASP  HN   -31.01703  16.04183  -9.24206 1S   350    0.00000
 5249  332 ASP  CA   -30.30333  16.49927  -7.36019 1S   350    1.00000
 5250  332 ASP  HA   -29.92402  15.94903  -6.50846 1S   350    0.00000
 5251  332 ASP  CB   -29.27149  17.56616  -7.81957 1S   350    1.00000
 5252  332 ASP  HB1  -29.67659  18.14839  -8.67346 1S   350    0.00000
 5253  332 ASP  HB2  -28.36706  17.03125  -8.17745 1S   350    0.00000
 5254  332 ASP  CG   -28.83561  18.53646  -6.71534 1S   350    1.00000
 5255  332 ASP  OD1  -29.32898  18.41859  -5.56241 1S   350    1.00000
 5256  332 ASP  OD2  -27.98907  19.41675  -7.02544 1S   350    1.00000
 5257  332 ASP  C    -31.61655  17.13916  -6.99943 1S   350    1.00000
 5258  332 ASP  O    -32.10030  18.02454  -7.70184 1S   350    1.00000
 5259  333 LEU  N    -32.23487  16.67933  -5.88991 1S   351    1.00000
 5260  333 LEU  HN   -31.82186  15.97096  -5.31944 1S   351    0.00000
 5261  333 LEU  CA   -33.54883  17.11837  -5.48518 1S   351    1.00000
 5262  333 LEU  HA   -34.12955  17.34935  -6.36731 1S   351    0.00000
 5263  333 LEU  CB   -34.31969  16.06141  -4.65332 1S   351    1.00000
 5264  333 LEU  HB1  -35.26754  16.52766  -4.29698 1S   351    0.00000
 5265  333 LEU  HB2  -33.72962  15.78437  -3.75610 1S   351    0.00000
 5266  333 LEU  CG   -34.71490  14.76845  -5.40913 1S   351    1.00000
 5267  333 LEU  HG   -34.98930  15.05152  -6.45082 1S   351    0.00000
 5268  333 LEU  CD1  -33.57972  13.72993  -5.48793 1S   351    1.00000
 5269  333 LEU  HD11 -33.25369  13.43873  -4.46794 1S   351    0.00000
 5270  333 LEU  HD12 -32.70331  14.12806  -6.03674 1S   351    0.00000
 5271  333 LEU  HD13 -33.93342  12.82084  -6.01791 1S   351    0.00000
 5272  333 LEU  CD2  -35.96799  14.14356  -4.76452 1S   351    1.00000
 5273  333 LEU  HD21 -36.81345  14.86350  -4.78490 1S   351    0.00000
 5274  333 LEU  HD22 -35.76057  13.87650  -3.70738 1S   351    0.00000
 5275  333 LEU  HD23 -36.27076  13.22516  -5.30953 1S   351    0.00000
 5276  333 LEU  C    -33.45838  18.36879  -4.64563 1S   351    1.00000
 5277  333 LEU  O    -34.45328  19.07425  -4.49059 1S   351    1.00000
 5278  334 GLY  N    -32.26689  18.66348  -4.07382 1S   352    1.00000
 5279  334 GLY  HN   -31.45409  18.11747  -4.27009 1S   352    0.00000
 5280  334 GLY  CA   -32.08518  19.73874  -3.12589 1S   352    1.00000
 5281  334 GLY  HA1  -32.86712  20.47760  -3.23910 1S   352    0.00000
 5282  334 GLY  HA2  -31.09170  20.13533  -3.27465 1S   352    0.00000
 5283  334 GLY  C    -32.16772  19.15479  -1.75060 1S   352    1.00000
 5284  334 GLY  O    -32.53047  17.99304  -1.57987 1S   352    1.00000
 5285  335 LYS  N    -31.82700  19.96733  -0.72244 1S   353    1.00000
 5286  335 LYS  HN   -31.54877  20.91072  -0.89881 1S   353    0.00000
 5287  335 LYS  CA   -31.91705  19.61182   0.68257 1S   353    1.00000
 5288  335 LYS  HA   -31.49866  20.45630   1.21036 1S   353    0.00000
 5289  335 LYS  CB   -33.37827  19.43652   1.18155 1S   353    1.00000
 5290  335 LYS  HB1  -33.38817  19.46828   2.29259 1S   353    0.00000
 5291  335 LYS  HB2  -33.77132  18.44615   0.86023 1S   353    0.00000
 5292  335 LYS  CG   -34.32115  20.51727   0.62908 1S   353    1.00000
 5293  335 LYS  HG1  -34.44750  20.34095  -0.46321 1S   353    0.00000
 5294  335 LYS  HG2  -33.84425  21.51178   0.75451 1S   353    0.00000
 5295  335 LYS  CD   -35.72104  20.54761   1.26107 1S   353    1.00000
 5296  335 LYS  HD1  -36.01213  19.52546   1.58681 1S   353    0.00000
 5297  335 LYS  HD2  -36.43311  20.86635   0.46574 1S   353    0.00000
 5298  335 LYS  CE   -35.82928  21.54608   2.41903 1S   353    1.00000
 5299  335 LYS  HE1  -35.40657  22.52749   2.11386 1S   353    0.00000
 5300  335 LYS  HE2  -35.28468  21.17563   3.31228 1S   353    0.00000
 5301  335 LYS  NZ   -37.24403  21.77509   2.79632 1S   353    1.00000
 5302  335 LYS  HZ1  -37.67597  20.88233   3.10648 1S   353    0.00000
 5303  335 LYS  HZ2  -37.77839  22.14043   1.97985 1S   353    0.00000
 5304  335 LYS  HZ3  -37.29055  22.46940   3.56867 1S   353    0.00000
 5305  335 LYS  C    -31.07896  18.40300   1.05049 1S   353    1.00000
 5306  335 LYS  O    -31.44436  17.62159   1.92723 1S   353    1.00000
 5307  336 GLY  N    -29.92332  18.22733   0.36311 1S   354    1.00000
 5308  336 GLY  HN   -29.65756  18.87728  -0.34458 1S   354    0.00000
 5309  336 GLY  CA   -28.98213  17.15491   0.60844 1S   354    1.00000
 5310  336 GLY  HA1  -28.81119  17.09564   1.67421 1S   354    0.00000
 5311  336 GLY  HA2  -28.08871  17.40278   0.05544 1S   354    0.00000
 5312  336 GLY  C    -29.45130  15.80368   0.13032 1S   354    1.00000
 5313  336 GLY  O    -28.91003  14.78221   0.55045 1S   354    1.00000
 5314  337 ASP  N    -30.46973  15.76453  -0.75829 1S   355    1.00000
 5315  337 ASP  HN   -30.89736  16.60443  -1.08742 1S   355    0.00000
 5316  337 ASP  CA   -31.06643  14.54362  -1.24468 1S   355    1.00000
 5317  337 ASP  HA   -30.75270  13.70762  -0.63378 1S   355    0.00000
 5318  337 ASP  CB   -32.61113  14.65907  -1.19067 1S   355    1.00000
 5319  337 ASP  HB1  -32.93547  15.49720  -1.83930 1S   355    0.00000
 5320  337 ASP  HB2  -32.90345  14.91072  -0.14687 1S   355    0.00000
 5321  337 ASP  CG   -33.37736  13.40077  -1.59768 1S   355    1.00000
 5322  337 ASP  OD1  -32.75868  12.40327  -2.04786 1S   355    1.00000
 5323  337 ASP  OD2  -34.62739  13.43219  -1.45621 1S   355    1.00000
 5324  337 ASP  C    -30.58222  14.33850  -2.65982 1S   355    1.00000
 5325  337 ASP  O    -30.94075  15.09134  -3.56472 1S   355    1.00000
 5326  338 PHE  N    -29.74346  13.29567  -2.86488 1S   356    1.00000
 5327  338 PHE  HN   -29.47088  12.70058  -2.11361 1S   356    0.00000
 5328  338 PHE  CA   -29.17206  12.97080  -4.15326 1S   356    1.00000
 5329  338 PHE  HA   -29.60711  13.59925  -4.91752 1S   356    0.00000
 5330  338 PHE  CB   -27.62873  13.08881  -4.18839 1S   356    1.00000
 5331  338 PHE  HB1  -27.26083  12.94327  -5.22572 1S   356    0.00000
 5332  338 PHE  HB2  -27.15631  12.32726  -3.53069 1S   356    0.00000
 5333  338 PHE  CG   -27.18221  14.44606  -3.71730 1S   356    1.00000
 5334  338 PHE  CD1  -27.07936  15.52266  -4.61471 1S   356    1.00000
 5335  338 PHE  HD1  -27.32860  15.38147  -5.65648 1S   356    0.00000
 5336  338 PHE  CE1  -26.65287  16.78011  -4.16801 1S   356    1.00000
 5337  338 PHE  HE1  -26.57501  17.60475  -4.86074 1S   356    0.00000
 5338  338 PHE  CZ   -26.33150  16.97325  -2.81964 1S   356    1.00000
 5339  338 PHE  HZ   -26.00025  17.94068  -2.47673 1S   356    0.00000
 5340  338 PHE  CD2  -26.85501  14.65331  -2.36448 1S   356    1.00000
 5341  338 PHE  HD2  -26.93556  13.83677  -1.66208 1S   356    0.00000
 5342  338 PHE  CE2  -26.43470  15.91025  -1.91625 1S   356    1.00000
 5343  338 PHE  HE2  -26.18391  16.05695  -0.87614 1S   356    0.00000
 5344  338 PHE  C    -29.52025  11.53596  -4.44873 1S   356    1.00000
 5345  338 PHE  O    -29.44441  10.68770  -3.56107 1S   356    1.00000
 5346  339 ARG  N    -29.93118  11.22997  -5.70482 1S   357    1.00000
 5347  339 ARG  HN   -29.97568  11.92462  -6.42254 1S   357    0.00000
 5348  339 ARG  CA   -30.38891   9.90468  -6.06880 1S   357    1.00000
 5349  339 ARG  HA   -29.93005   9.17252  -5.42049 1S   357    0.00000
 5350  339 ARG  CB   -31.92884   9.77359  -6.02783 1S   357    1.00000
 5351  339 ARG  HB1  -32.23134   8.74568  -6.32687 1S   357    0.00000
 5352  339 ARG  HB2  -32.37664  10.48655  -6.75608 1S   357    0.00000
 5353  339 ARG  CG   -32.54303  10.08130  -4.65756 1S   357    1.00000
 5354  339 ARG  HG1  -32.23069  11.10589  -4.35518 1S   357    0.00000
 5355  339 ARG  HG2  -32.15233   9.36531  -3.90128 1S   357    0.00000
 5356  339 ARG  CD   -34.06853  10.01969  -4.70279 1S   357    1.00000
 5357  339 ARG  HD1  -34.40604   8.96122  -4.72595 1S   357    0.00000
 5358  339 ARG  HD2  -34.45510  10.55881  -5.59395 1S   357    0.00000
 5359  339 ARG  NE   -34.59844  10.70887  -3.48555 1S   357    1.00000
 5360  339 ARG  HE   -33.99167  11.31318  -2.96279 1S   357    0.00000
 5361  339 ARG  CZ   -35.89181  10.57211  -3.07862 1S   357    1.00000
 5362  339 ARG  NH1  -36.32450  11.23923  -1.97912 1S   357    1.00000
 5363  339 ARG  HH11 -35.71098  11.90806  -1.54607 1S   357    0.00000
 5364  339 ARG  HH12 -37.26234  11.12766  -1.66093 1S   357    0.00000
 5365  339 ARG  NH2  -36.75244   9.76254  -3.74725 1S   357    1.00000
 5366  339 ARG  HH21 -36.43667   9.27475  -4.56284 1S   357    0.00000
 5367  339 ARG  HH22 -37.69398   9.67436  -3.44622 1S   357    0.00000
 5368  339 ARG  C    -29.99170   9.59627  -7.48545 1S   357    1.00000
 5369  339 ARG  O    -29.85482  10.49441  -8.30360 1S   357    1.00000
 5370  340 ILE  N    -29.83187   8.29669  -7.81932 1S   358    1.00000
 5371  340 ILE  HN   -29.88545   7.58274  -7.12178 1S   358    0.00000
 5372  340 ILE  CA   -29.69578   7.82183  -9.18206 1S   358    1.00000
 5373  340 ILE  HA   -29.72564   8.65471  -9.87046 1S   358    0.00000
 5374  340 ILE  CB   -28.39597   7.04376  -9.41493 1S   358    1.00000
 5375  340 ILE  HB   -28.17589   6.44601  -8.50045 1S   358    0.00000
 5376  340 ILE  CG2  -28.48546   6.05708 -10.60404 1S   358    1.00000
 5377  340 ILE  HG21 -28.72642   6.60048 -11.54175 1S   358    0.00000
 5378  340 ILE  HG22 -29.25326   5.27555 -10.42809 1S   358    0.00000
 5379  340 ILE  HG23 -27.52249   5.52837 -10.74350 1S   358    0.00000
 5380  340 ILE  CG1  -27.24769   8.05927  -9.62841 1S   358    1.00000
 5381  340 ILE  HG11 -27.23363   8.76563  -8.77231 1S   358    0.00000
 5382  340 ILE  HG12 -27.45433   8.65932 -10.54160 1S   358    0.00000
 5383  340 ILE  CD   -25.86635   7.41531  -9.75969 1S   358    1.00000
 5384  340 ILE  HD1  -25.77747   6.88356 -10.73026 1S   358    0.00000
 5385  340 ILE  HD2  -25.69122   6.68977  -8.93797 1S   358    0.00000
 5386  340 ILE  HD3  -25.07421   8.18909  -9.71980 1S   358    0.00000
 5387  340 ILE  C    -30.91465   6.97592  -9.44839 1S   358    1.00000
 5388  340 ILE  O    -31.36337   6.21961  -8.59235 1S   358    1.00000
 5389  341 LEU  N    -31.48083   7.09420 -10.66894 1S   359    1.00000
 5390  341 LEU  HN   -31.12657   7.75187 -11.33328 1S   359    0.00000
 5391  341 LEU  CA   -32.53937   6.24624 -11.15569 1S   359    1.00000
 5392  341 LEU  HA   -32.84495   5.54369 -10.39548 1S   359    0.00000
 5393  341 LEU  CB   -33.74978   7.08905 -11.61278 1S   359    1.00000
 5394  341 LEU  HB1  -33.47471   7.68273 -12.50901 1S   359    0.00000
 5395  341 LEU  HB2  -33.95071   7.82404 -10.80317 1S   359    0.00000
 5396  341 LEU  CG   -35.08766   6.35794 -11.88114 1S   359    1.00000
 5397  341 LEU  HG   -35.40669   5.86503 -10.93363 1S   359    0.00000
 5398  341 LEU  CD1  -36.15294   7.40620 -12.24154 1S   359    1.00000
 5399  341 LEU  HD11 -35.84941   7.95859 -13.15693 1S   359    0.00000
 5400  341 LEU  HD12 -36.27952   8.13497 -11.41320 1S   359    0.00000
 5401  341 LEU  HD13 -37.12671   6.91060 -12.43456 1S   359    0.00000
 5402  341 LEU  CD2  -35.03868   5.27177 -12.97169 1S   359    1.00000
 5403  341 LEU  HD21 -34.48434   4.37948 -12.61772 1S   359    0.00000
 5404  341 LEU  HD22 -34.54709   5.66557 -13.88712 1S   359    0.00000
 5405  341 LEU  HD23 -36.06699   4.94658 -13.23614 1S   359    0.00000
 5406  341 LEU  C    -31.94212   5.51832 -12.32871 1S   359    1.00000
 5407  341 LEU  O    -31.52429   6.15063 -13.29639 1S   359    1.00000
 5408  342 MET  N    -31.87627   4.16964 -12.26771 1S   360    1.00000
 5409  342 MET  HN   -32.18978   3.66108 -11.46550 1S   360    0.00000
 5410  342 MET  CA   -31.33129   3.38741 -13.34550 1S   360    1.00000
 5411  342 MET  HA   -31.69305   3.78041 -14.28676 1S   360    0.00000
 5412  342 MET  CB   -29.78790   3.38408 -13.30252 1S   360    1.00000
 5413  342 MET  HB1  -29.43594   2.90983 -12.36003 1S   360    0.00000
 5414  342 MET  HB2  -29.48779   4.45445 -13.27158 1S   360    0.00000
 5415  342 MET  CG   -29.09125   2.72650 -14.50742 1S   360    1.00000
 5416  342 MET  HG1  -29.44092   3.24335 -15.42580 1S   360    0.00000
 5417  342 MET  HG2  -29.43112   1.67054 -14.58347 1S   360    0.00000
 5418  342 MET  SD   -27.26503   2.74287 -14.43805 1S   360    1.00000
 5419  342 MET  CE   -26.95285   4.41141 -13.77816 1S   360    1.00000
 5420  342 MET  HE1  -27.44814   4.57349 -12.79980 1S   360    0.00000
 5421  342 MET  HE2  -27.31083   5.20067 -14.46048 1S   360    0.00000
 5422  342 MET  HE3  -25.87016   4.57605 -13.61877 1S   360    0.00000
 5423  342 MET  C    -31.82195   1.98283 -13.18529 1S   360    1.00000
 5424  342 MET  O    -31.79854   1.43514 -12.08868 1S   360    1.00000
 5425  343 CYS  N    -32.27257   1.35243 -14.29191 1S   361    1.00000
 5426  343 CYS  HN   -32.33418   1.82406 -15.16795 1S   361    0.00000
 5427  343 CYS  CA   -32.67038  -0.03623 -14.30574 1S   361    1.00000
 5428  343 CYS  HA   -32.99485  -0.33208 -13.31772 1S   361    0.00000
 5429  343 CYS  CB   -33.82580  -0.27654 -15.30411 1S   361    1.00000
 5430  343 CYS  HB1  -34.11434  -1.34718 -15.29895 1S   361    0.00000
 5431  343 CYS  HB2  -33.48171  -0.02506 -16.33047 1S   361    0.00000
 5432  343 CYS  SG   -35.26313   0.76511 -14.87750 1S   361    1.00000
 5433  343 CYS  C    -31.45004  -0.84376 -14.67714 1S   361    1.00000
 5434  343 CYS  O    -31.26448  -1.23756 -15.82705 1S   361    1.00000
 5435  344 THR  N    -30.56404  -1.07083 -13.67940 1S   362    1.00000
 5436  344 THR  HN   -30.76482  -0.77534 -12.74789 1S   362    0.00000
 5437  344 THR  CA   -29.21408  -1.55600 -13.88189 1S   362    1.00000
 5438  344 THR  HA   -28.79809  -1.03162 -14.73256 1S   362    0.00000
 5439  344 THR  CB   -28.33359  -1.29684 -12.67153 1S   362    1.00000
 5440  344 THR  HB   -28.70429  -1.88328 -11.80242 1S   362    0.00000
 5441  344 THR  OG1  -28.41408   0.07955 -12.33621 1S   362    1.00000
 5442  344 THR  HG1  -29.14854   0.15265 -11.71757 1S   362    0.00000
 5443  344 THR  CG2  -26.85425  -1.65678 -12.90812 1S   362    1.00000
 5444  344 THR  HG21 -26.43966  -1.06995 -13.75190 1S   362    0.00000
 5445  344 THR  HG22 -26.73838  -2.73736 -13.12551 1S   362    0.00000
 5446  344 THR  HG23 -26.25613  -1.43351 -11.99864 1S   362    0.00000
 5447  344 THR  C    -29.21497  -3.02905 -14.17023 1S   362    1.00000
 5448  344 THR  O    -29.86162  -3.81575 -13.47914 1S   362    1.00000
 5449  345 LYS  N    -28.46763  -3.41290 -15.22612 1S   363    1.00000
 5450  345 LYS  HN   -28.01949  -2.72950 -15.80643 1S   363    0.00000
 5451  345 LYS  CA   -28.22442  -4.77508 -15.61414 1S   363    1.00000
 5452  345 LYS  HA   -28.86349  -5.43877 -15.04948 1S   363    0.00000
 5453  345 LYS  CB   -28.43234  -4.99758 -17.13258 1S   363    1.00000
 5454  345 LYS  HB1  -28.29063  -6.07390 -17.37254 1S   363    0.00000
 5455  345 LYS  HB2  -27.67019  -4.41430 -17.69890 1S   363    0.00000
 5456  345 LYS  CG   -29.81706  -4.55647 -17.63958 1S   363    1.00000
 5457  345 LYS  HG1  -29.91667  -4.84573 -18.70924 1S   363    0.00000
 5458  345 LYS  HG2  -29.87674  -3.44592 -17.58570 1S   363    0.00000
 5459  345 LYS  CD   -30.98450  -5.15440 -16.83968 1S   363    1.00000
 5460  345 LYS  HD1  -30.84275  -4.91704 -15.76189 1S   363    0.00000
 5461  345 LYS  HD2  -30.97313  -6.26062 -16.95109 1S   363    0.00000
 5462  345 LYS  CE   -32.34676  -4.58922 -17.24558 1S   363    1.00000
 5463  345 LYS  HE1  -32.60860  -4.88218 -18.28329 1S   363    0.00000
 5464  345 LYS  HE2  -32.34328  -3.48116 -17.16121 1S   363    0.00000
 5465  345 LYS  NZ   -33.39370  -5.10623 -16.33602 1S   363    1.00000
 5466  345 LYS  HZ1  -33.10467  -4.92964 -15.35229 1S   363    0.00000
 5467  345 LYS  HZ2  -33.50431  -6.12980 -16.48283 1S   363    0.00000
 5468  345 LYS  HZ3  -34.29648  -4.62550 -16.52478 1S   363    0.00000
 5469  345 LYS  C    -26.80393  -5.09297 -15.25738 1S   363    1.00000
 5470  345 LYS  O    -25.99065  -4.20284 -15.01544 1S   363    1.00000
 5471  346 VAL  N    -26.47045  -6.40118 -15.20923 1S   364    1.00000
 5472  346 VAL  HN   -27.13658  -7.11341 -15.41358 1S   364    0.00000
 5473  346 VAL  CA   -25.15124  -6.86762 -14.84775 1S   364    1.00000
 5474  346 VAL  HA   -24.67950  -6.14061 -14.20176 1S   364    0.00000
 5475  346 VAL  CB   -25.19227  -8.20654 -14.11311 1S   364    1.00000
 5476  346 VAL  HB   -25.61183  -8.99451 -14.77867 1S   364    0.00000
 5477  346 VAL  CG1  -23.77675  -8.62821 -13.66314 1S   364    1.00000
 5478  346 VAL  HG11 -23.33559  -7.85289 -13.00252 1S   364    0.00000
 5479  346 VAL  HG12 -23.10565  -8.78294 -14.53217 1S   364    0.00000
 5480  346 VAL  HG13 -23.82799  -9.58292 -13.09745 1S   364    0.00000
 5481  346 VAL  CG2  -26.12086  -8.07224 -12.88574 1S   364    1.00000
 5482  346 VAL  HG21 -27.16267  -7.83558 -13.18358 1S   364    0.00000
 5483  346 VAL  HG22 -25.75008  -7.27241 -12.21020 1S   364    0.00000
 5484  346 VAL  HG23 -26.13595  -9.02782 -12.31946 1S   364    0.00000
 5485  346 VAL  C    -24.36504  -6.95306 -16.13364 1S   364    1.00000
 5486  346 VAL  O    -24.15573  -8.03249 -16.68380 1S   364    1.00000
 5487  347 THR  N    -23.95394  -5.77597 -16.66547 1S   365    1.00000
 5488  347 THR  HN   -24.15285  -4.90848 -16.21338 1S   365    0.00000
 5489  347 THR  CA   -23.25334  -5.66877 -17.92325 1S   365    1.00000
 5490  347 THR  HA   -22.78804  -6.61688 -18.14128 1S   365    0.00000
 5491  347 THR  CB   -24.12712  -5.26261 -19.12167 1S   365    1.00000
 5492  347 THR  HB   -23.54899  -5.42120 -20.06001 1S   365    0.00000
 5493  347 THR  OG1  -24.54673  -3.90054 -19.07914 1S   365    1.00000
 5494  347 THR  HG1  -25.00007  -3.73455 -19.91002 1S   365    0.00000
 5495  347 THR  CG2  -25.39259  -6.13831 -19.16287 1S   365    1.00000
 5496  347 THR  HG21 -26.05233  -5.89845 -18.30371 1S   365    0.00000
 5497  347 THR  HG22 -25.12868  -7.21471 -19.11051 1S   365    0.00000
 5498  347 THR  HG23 -25.96381  -5.95531 -20.09698 1S   365    0.00000
 5499  347 THR  C    -22.14721  -4.67137 -17.72680 1S   365    1.00000
 5500  347 THR  O    -22.17992  -3.86771 -16.79723 1S   365    1.00000
 5501  348 MET  N    -21.14855  -4.68681 -18.63698 1S   366    1.00000
 5502  348 MET  HN   -21.12443  -5.38012 -19.35578 1S   366    0.00000
 5503  348 MET  CA   -20.05102  -3.74867 -18.65049 1S   366    1.00000
 5504  348 MET  HA   -19.62529  -3.71861 -17.65709 1S   366    0.00000
 5505  348 MET  CB   -18.95977  -4.17791 -19.64944 1S   366    1.00000
 5506  348 MET  HB1  -19.41324  -4.30116 -20.65779 1S   366    0.00000
 5507  348 MET  HB2  -18.58440  -5.17773 -19.33305 1S   366    0.00000
 5508  348 MET  CG   -17.76126  -3.21629 -19.75219 1S   366    1.00000
 5509  348 MET  HG1  -17.31455  -3.09474 -18.74075 1S   366    0.00000
 5510  348 MET  HG2  -18.11164  -2.21513 -20.08237 1S   366    0.00000
 5511  348 MET  SD   -16.51160  -3.82141 -20.91787 1S   366    1.00000
 5512  348 MET  CE   -15.31585  -2.47566 -20.73532 1S   366    1.00000
 5513  348 MET  HE1  -15.06450  -2.31338 -19.66642 1S   366    0.00000
 5514  348 MET  HE2  -15.71733  -1.52529 -21.14591 1S   366    0.00000
 5515  348 MET  HE3  -14.37705  -2.71590 -21.27975 1S   366    0.00000
 5516  348 MET  C    -20.52837  -2.36377 -19.00960 1S   366    1.00000
 5517  348 MET  O    -20.07975  -1.38779 -18.41765 1S   366    1.00000
 5518  349 ASP  N    -21.48117  -2.24304 -19.96491 1S   367    1.00000
 5519  349 ASP  HN   -21.81120  -3.04265 -20.45927 1S   367    0.00000
 5520  349 ASP  CA   -22.09741  -0.98551 -20.34669 1S   367    1.00000
 5521  349 ASP  HA   -21.31562  -0.33262 -20.71085 1S   367    0.00000
 5522  349 ASP  CB   -23.19943  -1.18390 -21.42555 1S   367    1.00000
 5523  349 ASP  HB1  -23.91806  -0.33516 -21.42148 1S   367    0.00000
 5524  349 ASP  HB2  -23.76359  -2.11433 -21.20322 1S   367    0.00000
 5525  349 ASP  CG   -22.62724  -1.27620 -22.84401 1S   367    1.00000
 5526  349 ASP  OD1  -21.41992  -0.98096 -23.04387 1S   367    1.00000
 5527  349 ASP  OD2  -23.42027  -1.62819 -23.75795 1S   367    1.00000
 5528  349 ASP  C    -22.72350  -0.28156 -19.16243 1S   367    1.00000
 5529  349 ASP  O    -22.46692   0.89987 -18.94314 1S   367    1.00000
 5530  350 ASP  N    -23.53345  -0.99730 -18.34973 1S   368    1.00000
 5531  350 ASP  HN   -23.74289  -1.95592 -18.53497 1S   368    0.00000
 5532  350 ASP  CA   -24.21575  -0.41532 -17.21171 1S   368    1.00000
 5533  350 ASP  HA   -24.59265   0.55444 -17.50632 1S   368    0.00000
 5534  350 ASP  CB   -25.39716  -1.27726 -16.71560 1S   368    1.00000
 5535  350 ASP  HB1  -25.73159  -0.92084 -15.71753 1S   368    0.00000
 5536  350 ASP  HB2  -25.09158  -2.34044 -16.62908 1S   368    0.00000
 5537  350 ASP  CG   -26.59352  -1.15964 -17.66121 1S   368    1.00000
 5538  350 ASP  OD1  -26.43549  -0.65236 -18.80207 1S   368    1.00000
 5539  350 ASP  OD2  -27.70383  -1.56710 -17.23212 1S   368    1.00000
 5540  350 ASP  C    -23.27740  -0.17844 -16.05690 1S   368    1.00000
 5541  350 ASP  O    -23.50883   0.71925 -15.24913 1S   368    1.00000
 5542  351 PHE  N    -22.16247  -0.94192 -15.98039 1S   369    1.00000
 5543  351 PHE  HN   -22.02269  -1.70377 -16.61030 1S   369    0.00000
 5544  351 PHE  CA   -21.07387  -0.69028 -15.06315 1S   369    1.00000
 5545  351 PHE  HA   -21.49329  -0.63903 -14.07223 1S   369    0.00000
 5546  351 PHE  CB   -20.03921  -1.85452 -15.09342 1S   369    1.00000
 5547  351 PHE  HB1  -19.80952  -2.12605 -16.14074 1S   369    0.00000
 5548  351 PHE  HB2  -20.49059  -2.74502 -14.60965 1S   369    0.00000
 5549  351 PHE  CG   -18.73315  -1.56600 -14.40208 1S   369    1.00000
 5550  351 PHE  CD1  -18.58424  -1.72519 -13.01520 1S   369    1.00000
 5551  351 PHE  HD1  -19.41792  -2.06804 -12.42069 1S   369    0.00000
 5552  351 PHE  CE1  -17.35769  -1.44281 -12.39880 1S   369    1.00000
 5553  351 PHE  HE1  -17.24706  -1.56695 -11.33198 1S   369    0.00000
 5554  351 PHE  CZ   -16.27942  -0.97815 -13.16389 1S   369    1.00000
 5555  351 PHE  HZ   -15.34180  -0.73324 -12.68826 1S   369    0.00000
 5556  351 PHE  CD2  -17.63552  -1.12733 -15.16181 1S   369    1.00000
 5557  351 PHE  HD2  -17.74180  -1.01079 -16.23031 1S   369    0.00000
 5558  351 PHE  CE2  -16.41668  -0.82378 -14.54749 1S   369    1.00000
 5559  351 PHE  HE2  -15.58506  -0.47046 -15.13967 1S   369    0.00000
 5560  351 PHE  C    -20.46766   0.66812 -15.35601 1S   369    1.00000
 5561  351 PHE  O    -20.30528   1.46632 -14.44164 1S   369    1.00000
 5562  352 LEU  N    -20.17323   0.98399 -16.63762 1S   370    1.00000
 5563  352 LEU  HN   -20.33670   0.33346 -17.37842 1S   370    0.00000
 5564  352 LEU  CA   -19.58108   2.24755 -17.02599 1S   370    1.00000
 5565  352 LEU  HA   -18.75938   2.44594 -16.35317 1S   370    0.00000
 5566  352 LEU  CB   -19.06586   2.22911 -18.48278 1S   370    1.00000
 5567  352 LEU  HB1  -18.68228   3.23791 -18.74887 1S   370    0.00000
 5568  352 LEU  HB2  -19.91010   1.99679 -19.16961 1S   370    0.00000
 5569  352 LEU  CG   -17.92804   1.21582 -18.74424 1S   370    1.00000
 5570  352 LEU  HG   -18.33917   0.19171 -18.61514 1S   370    0.00000
 5571  352 LEU  CD1  -17.43581   1.32780 -20.19727 1S   370    1.00000
 5572  352 LEU  HD11 -17.01123   2.33871 -20.37730 1S   370    0.00000
 5573  352 LEU  HD12 -18.27318   1.16317 -20.90734 1S   370    0.00000
 5574  352 LEU  HD13 -16.64763   0.57132 -20.39528 1S   370    0.00000
 5575  352 LEU  CD2  -16.75641   1.35632 -17.75439 1S   370    1.00000
 5576  352 LEU  HD21 -17.08832   1.18085 -16.71098 1S   370    0.00000
 5577  352 LEU  HD22 -16.31367   2.37206 -17.81931 1S   370    0.00000
 5578  352 LEU  HD23 -15.97119   0.60718 -17.98693 1S   370    0.00000
 5579  352 LEU  C    -20.54026   3.40241 -16.88100 1S   370    1.00000
 5580  352 LEU  O    -20.13669   4.49657 -16.49016 1S   370    1.00000
 5581  353 THR  N    -21.84434   3.17287 -17.16283 1S   371    1.00000
 5582  353 THR  HN   -22.13123   2.27945 -17.50501 1S   371    0.00000
 5583  353 THR  CA   -22.90300   4.15685 -17.02874 1S   371    1.00000
 5584  353 THR  HA   -22.60969   5.02808 -17.59893 1S   371    0.00000
 5585  353 THR  CB   -24.23748   3.64688 -17.55916 1S   371    1.00000
 5586  353 THR  HB   -24.52605   2.70850 -17.03688 1S   371    0.00000
 5587  353 THR  OG1  -24.12968   3.36471 -18.94976 1S   371    1.00000
 5588  353 THR  HG1  -23.69818   2.50758 -19.02445 1S   371    0.00000
 5589  353 THR  CG2  -25.35943   4.68901 -17.36541 1S   371    1.00000
 5590  353 THR  HG21 -25.05468   5.67589 -17.77267 1S   371    0.00000
 5591  353 THR  HG22 -25.60677   4.80957 -16.29094 1S   371    0.00000
 5592  353 THR  HG23 -26.28143   4.35770 -17.88611 1S   371    0.00000
 5593  353 THR  C    -23.05944   4.58055 -15.58490 1S   371    1.00000
 5594  353 THR  O    -23.31660   5.74594 -15.30313 1S   371    1.00000
 5595  354 ALA  N    -22.86849   3.65214 -14.62177 1S   372    1.00000
 5596  354 ALA  HN   -22.65711   2.70434 -14.85438 1S   372    0.00000
 5597  354 ALA  CA   -22.97412   3.93508 -13.20795 1S   372    1.00000
 5598  354 ALA  HA   -23.92789   4.40991 -13.03941 1S   372    0.00000
 5599  354 ALA  CB   -22.91973   2.64787 -12.37287 1S   372    1.00000
 5600  354 ALA  HB1  -21.96119   2.11130 -12.53278 1S   372    0.00000
 5601  354 ALA  HB2  -23.75119   1.97432 -12.67473 1S   372    0.00000
 5602  354 ALA  HB3  -23.03032   2.86981 -11.29026 1S   372    0.00000
 5603  354 ALA  C    -21.90909   4.88986 -12.72448 1S   372    1.00000
 5604  354 ALA  O    -22.19400   5.76531 -11.91188 1S   372    1.00000
 5605  355 HSE  N    -20.66635   4.77669 -13.25104 1S   373    1.00000
 5606  355 HSE  HN   -20.44218   4.03317 -13.87866 1S   373    0.00000
 5607  355 HSE  CA   -19.58301   5.69827 -12.96651 1S   373    1.00000
 5608  355 HSE  HA   -19.51463   5.81556 -11.89368 1S   373    0.00000
 5609  355 HSE  CB   -18.21674   5.20710 -13.50396 1S   373    1.00000
 5610  355 HSE  HB1  -17.45506   6.00755 -13.38710 1S   373    0.00000
 5611  355 HSE  HB2  -18.29813   4.96586 -14.58601 1S   373    0.00000
 5612  355 HSE  ND1  -18.28748   2.77366 -12.95068 1S   373    1.00000
 5613  355 HSE  CG   -17.69221   4.00301 -12.77108 1S   373    1.00000
 5614  355 HSE  CE1  -17.62421   1.94969 -12.16982 1S   373    1.00000
 5615  355 HSE  HE1  -17.85507   0.89446 -12.04665 1S   373    0.00000
 5616  355 HSE  NE2  -16.62760   2.57688 -11.50047 1S   373    1.00000
 5617  355 HSE  HE2  -16.00200   2.17340 -10.83147 1S   373    0.00000
 5618  355 HSE  CD2  -16.67144   3.90190 -11.87819 1S   373    1.00000
 5619  355 HSE  HD2  -16.00906   4.66227 -11.49633 1S   373    0.00000
 5620  355 HSE  C    -19.86468   7.05584 -13.56432 1S   373    1.00000
 5621  355 HSE  O    -19.58275   8.07818 -12.94577 1S   373    1.00000
 5622  356 HSD  N    -20.46659   7.09331 -14.77468 1S   374    1.00000
 5623  356 HSD  HN   -20.67058   6.24674 -15.26345 1S   374    0.00000
 5624  356 HSD  CA   -20.85567   8.30805 -15.45697 1S   374    1.00000
 5625  356 HSD  HA   -19.97299   8.92238 -15.54646 1S   374    0.00000
 5626  356 HSD  CB   -21.40237   7.99029 -16.87137 1S   374    1.00000
 5627  356 HSD  HB1  -22.31302   7.36326 -16.79661 1S   374    0.00000
 5628  356 HSD  HB2  -20.63625   7.39365 -17.41465 1S   374    0.00000
 5629  356 HSD  ND1  -21.09522   9.55760 -18.85571 1S   374    1.00000
 5630  356 HSD  HD1  -20.30959   9.08413 -19.25901 1S   374    0.00000
 5631  356 HSD  CG   -21.75390   9.19184 -17.70212 1S   374    1.00000
 5632  356 HSD  CE1  -21.71722  10.66544 -19.32822 1S   374    1.00000
[truncated: 276,049 more chars]
