# Supplementary material for: Genetic Uniformity of a Specific Region in SARS-CoV-2 Genome and In-Silico Target-Oriented Repurposing of N-Acetyl-D-Glucosamine
Source: Preprints.org preprint supplement (doi:10.20944/preprints202005.0397.v1), 2020-05-24
Supplement: Supplementary file 7 [file supplementary › S6 File/target.pdb]

REMARK  PYCHARMM CRD
REMARK   DATE:     5/ 6/20     14:17:52      CREATED BY USER: root
REMARK 
ATOM      1 N    SER    19     -31.413  49.445   2.489  1.00  1.00      1S   
ATOM      2 HT1  SER    19     -32.119  48.940   1.918  1.00  0.00      1S   
ATOM      3 HT2  SER    19     -31.691  49.413   3.491  1.00  0.00      1S   
ATOM      4 HT3  SER    19     -30.478  48.994   2.377  1.00  0.00      1S   
ATOM      5 CA   SER    19     -31.329  50.867   2.050  1.00  1.00      1S   
ATOM      6 HA   SER    19     -32.314  51.285   2.208  1.00  0.00      1S   
ATOM      7 CB   SER    19     -30.262  51.650   2.871  1.00  1.00      1S   
ATOM      8 HB1  SER    19     -29.445  52.045   2.231  1.00  0.00      1S   
ATOM      9 HB2  SER    19     -29.797  50.997   3.640  1.00  0.00      1S   
ATOM     10 OG   SER    19     -30.864  52.754   3.535  1.00  1.00      1S   
ATOM     11 HG1  SER    19     -30.158  53.210   4.002  1.00  0.00      1S   
ATOM     12 C    SER    19     -31.032  50.959   0.583  1.00  1.00      1S   
ATOM     13 O    SER    19     -31.857  51.449  -0.183  1.00  1.00      1S   
ATOM     14 N    THR    20     -29.841  50.471   0.150  1.00  1.00      1S   
ATOM     15 HN   THR    20     -29.183  50.063   0.784  1.00  0.00      1S   
ATOM     16 CA   THR    20     -29.408  50.521  -1.232  1.00  1.00      1S   
ATOM     17 HA   THR    20     -29.638  51.510  -1.605  1.00  0.00      1S   
ATOM     18 CB   THR    20     -27.899  50.288  -1.414  1.00  1.00      1S   
ATOM     19 HB   THR    20     -27.590  50.668  -2.412  1.00  0.00      1S   
ATOM     20 OG1  THR    20     -27.528  48.917  -1.339  1.00  1.00      1S   
ATOM     21 HG1  THR    20     -26.569  48.903  -1.298  1.00  0.00      1S   
ATOM     22 CG2  THR    20     -27.113  51.039  -0.323  1.00  1.00      1S   
ATOM     23 HG21 THR    20     -27.287  50.592   0.678  1.00  0.00      1S   
ATOM     24 HG22 THR    20     -27.404  52.109  -0.292  1.00  0.00      1S   
ATOM     25 HG23 THR    20     -26.023  50.975  -0.531  1.00  0.00      1S   
ATOM     26 C    THR    20     -30.191  49.508  -2.038  1.00  1.00      1S   
ATOM     27 O    THR    20     -30.858  48.644  -1.476  1.00  1.00      1S   
ATOM     28 N    ILE    21     -30.090  49.564  -3.383  1.00  1.00      1S   
ATOM     29 HN   ILE    21     -29.548  50.269  -3.833  1.00  0.00      1S   
ATOM     30 CA   ILE    21     -30.741  48.621  -4.271  1.00  1.00      1S   
ATOM     31 HA   ILE    21     -31.770  48.524  -3.953  1.00  0.00      1S   
ATOM     32 CB   ILE    21     -30.712  49.122  -5.712  1.00  1.00      1S   
ATOM     33 HB   ILE    21     -29.694  49.528  -5.918  1.00  0.00      1S   
ATOM     34 CG2  ILE    21     -30.968  47.989  -6.735  1.00  1.00      1S   
ATOM     35 HG21 ILE    21     -31.900  47.438  -6.490  1.00  0.00      1S   
ATOM     36 HG22 ILE    21     -30.125  47.269  -6.757  1.00  0.00      1S   
ATOM     37 HG23 ILE    21     -31.062  48.423  -7.752  1.00  0.00      1S   
ATOM     38 CG1  ILE    21     -31.723  50.287  -5.879  1.00  1.00      1S   
ATOM     39 HG11 ILE    21     -31.442  50.875  -6.781  1.00  0.00      1S   
ATOM     40 HG12 ILE    21     -31.646  50.969  -5.005  1.00  0.00      1S   
ATOM     41 CD   ILE    21     -33.184  49.839  -6.033  1.00  1.00      1S   
ATOM     42 HD1  ILE    21     -33.474  49.129  -5.230  1.00  0.00      1S   
ATOM     43 HD2  ILE    21     -33.338  49.343  -7.015  1.00  0.00      1S   
ATOM     44 HD3  ILE    21     -33.862  50.717  -5.985  1.00  0.00      1S   
ATOM     45 C    ILE    21     -30.112  47.252  -4.137  1.00  1.00      1S   
ATOM     46 O    ILE    21     -30.816  46.244  -4.161  1.00  1.00      1S   
ATOM     47 N    GLU    22     -28.772  47.185  -3.948  1.00  1.00      1S   
ATOM     48 HN   GLU    22     -28.214  48.010  -3.915  1.00  0.00      1S   
ATOM     49 CA   GLU    22     -28.058  45.939  -3.789  1.00  1.00      1S   
ATOM     50 HA   GLU    22     -28.343  45.306  -4.613  1.00  0.00      1S   
ATOM     51 CB   GLU    22     -26.522  46.126  -3.822  1.00  1.00      1S   
ATOM     52 HB1  GLU    22     -26.220  46.860  -3.044  1.00  0.00      1S   
ATOM     53 HB2  GLU    22     -26.257  46.554  -4.815  1.00  0.00      1S   
ATOM     54 CG   GLU    22     -25.739  44.812  -3.618  1.00  1.00      1S   
ATOM     55 HG1  GLU    22     -26.091  44.047  -4.342  1.00  0.00      1S   
ATOM     56 HG2  GLU    22     -25.919  44.430  -2.590  1.00  0.00      1S   
ATOM     57 CD   GLU    22     -24.239  45.018  -3.807  1.00  1.00      1S   
ATOM     58 OE1  GLU    22     -23.837  45.510  -4.894  1.00  1.00      1S   
ATOM     59 OE2  GLU    22     -23.473  44.664  -2.870  1.00  1.00      1S   
ATOM     60 C    GLU    22     -28.452  45.217  -2.527  1.00  1.00      1S   
ATOM     61 O    GLU    22     -28.665  44.008  -2.552  1.00  1.00      1S   
ATOM     62 N    GLU    23     -28.597  45.943  -1.395  1.00  1.00      1S   
ATOM     63 HN   GLU    23     -28.433  46.928  -1.388  1.00  0.00      1S   
ATOM     64 CA   GLU    23     -28.965  45.362  -0.121  1.00  1.00      1S   
ATOM     65 HA   GLU    23     -28.275  44.556   0.087  1.00  0.00      1S   
ATOM     66 CB   GLU    23     -28.892  46.389   1.027  1.00  1.00      1S   
ATOM     67 HB1  GLU    23     -29.252  45.923   1.973  1.00  0.00      1S   
ATOM     68 HB2  GLU    23     -29.565  47.242   0.782  1.00  0.00      1S   
ATOM     69 CG   GLU    23     -27.462  46.906   1.269  1.00  1.00      1S   
ATOM     70 HG1  GLU    23     -27.025  47.298   0.333  1.00  0.00      1S   
ATOM     71 HG2  GLU    23     -26.813  46.074   1.613  1.00  0.00      1S   
ATOM     72 CD   GLU    23     -27.465  48.022   2.312  1.00  1.00      1S   
ATOM     73 OE1  GLU    23     -26.560  48.006   3.187  1.00  1.00      1S   
ATOM     74 OE2  GLU    23     -28.363  48.905   2.246  1.00  1.00      1S   
ATOM     75 C    GLU    23     -30.358  44.786  -0.149  1.00  1.00      1S   
ATOM     76 O    GLU    23     -30.620  43.771   0.489  1.00  1.00      1S   
ATOM     77 N    GLN    24     -31.278  45.402  -0.923  1.00  1.00      1S   
ATOM     78 HN   GLN    24     -31.050  46.224  -1.441  1.00  0.00      1S   
ATOM     79 CA   GLN    24     -32.635  44.928  -1.067  1.00  1.00      1S   
ATOM     80 HA   GLN    24     -33.009  44.652  -0.090  1.00  0.00      1S   
ATOM     81 CB   GLN    24     -33.551  46.005  -1.671  1.00  1.00      1S   
ATOM     82 HB1  GLN    24     -34.578  45.586  -1.782  1.00  0.00      1S   
ATOM     83 HB2  GLN    24     -33.165  46.273  -2.681  1.00  0.00      1S   
ATOM     84 CG   GLN    24     -33.671  47.267  -0.808  1.00  1.00      1S   
ATOM     85 HG1  GLN    24     -32.677  47.571  -0.429  1.00  0.00      1S   
ATOM     86 HG2  GLN    24     -34.324  47.067   0.067  1.00  0.00      1S   
ATOM     87 CD   GLN    24     -34.283  48.385  -1.657  1.00  1.00      1S   
ATOM     88 OE1  GLN    24     -35.230  48.163  -2.418  1.00  1.00      1S   
ATOM     89 NE2  GLN    24     -33.721  49.622  -1.527  1.00  1.00      1S   
ATOM     90 HE21 GLN    24     -34.107  50.396  -2.020  1.00  0.00      1S   
ATOM     91 HE22 GLN    24     -32.898  49.741  -0.968  1.00  0.00      1S   
ATOM     92 C    GLN    24     -32.691  43.714  -1.961  1.00  1.00      1S   
ATOM     93 O    GLN    24     -33.472  42.802  -1.709  1.00  1.00      1S   
ATOM     94 N    ALA    25     -31.839  43.662  -3.014  1.00  1.00      1S   
ATOM     95 HN   ALA    25     -31.243  44.435  -3.227  1.00  0.00      1S   
ATOM     96 CA   ALA    25     -31.711  42.527  -3.901  1.00  1.00      1S   
ATOM     97 HA   ALA    25     -32.697  42.281  -4.272  1.00  0.00      1S   
ATOM     98 CB   ALA    25     -30.791  42.824  -5.097  1.00  1.00      1S   
ATOM     99 HB1  ALA    25     -29.775  43.112  -4.755  1.00  0.00      1S   
ATOM    100 HB2  ALA    25     -31.209  43.663  -5.693  1.00  0.00      1S   
ATOM    101 HB3  ALA    25     -30.704  41.937  -5.761  1.00  0.00      1S   
ATOM    102 C    ALA    25     -31.161  41.324  -3.176  1.00  1.00      1S   
ATOM    103 O    ALA    25     -31.609  40.207  -3.409  1.00  1.00      1S   
ATOM    104 N    LYS    26     -30.207  41.532  -2.237  1.00  1.00      1S   
ATOM    105 HN   LYS    26     -29.823  42.444  -2.099  1.00  0.00      1S   
ATOM    106 CA   LYS    26     -29.689  40.501  -1.363  1.00  1.00      1S   
ATOM    107 HA   LYS    26     -29.290  39.706  -1.978  1.00  0.00      1S   
ATOM    108 CB   LYS    26     -28.590  41.019  -0.414  1.00  1.00      1S   
ATOM    109 HB1  LYS    26     -28.413  40.286   0.407  1.00  0.00      1S   
ATOM    110 HB2  LYS    26     -28.925  41.971   0.052  1.00  0.00      1S   
ATOM    111 CG   LYS    26     -27.238  41.247  -1.097  1.00  1.00      1S   
ATOM    112 HG1  LYS    26     -27.357  41.966  -1.936  1.00  0.00      1S   
ATOM    113 HG2  LYS    26     -26.875  40.284  -1.519  1.00  0.00      1S   
ATOM    114 CD   LYS    26     -26.208  41.793  -0.101  1.00  1.00      1S   
ATOM    115 HD1  LYS    26     -26.076  41.055   0.722  1.00  0.00      1S   
ATOM    116 HD2  LYS    26     -26.627  42.726   0.340  1.00  0.00      1S   
ATOM    117 CE   LYS    26     -24.853  42.097  -0.742  1.00  1.00      1S   
ATOM    118 HE1  LYS    26     -24.988  42.762  -1.620  1.00  0.00      1S   
ATOM    119 HE2  LYS    26     -24.343  41.166  -1.067  1.00  0.00      1S   
ATOM    120 NZ   LYS    26     -23.973  42.799   0.219  1.00  1.00      1S   
ATOM    121 HZ1  LYS    26     -23.593  42.119   0.908  1.00  0.00      1S   
ATOM    122 HZ2  LYS    26     -24.525  43.525   0.719  1.00  0.00      1S   
ATOM    123 HZ3  LYS    26     -23.193  43.255  -0.296  1.00  0.00      1S   
ATOM    124 C    LYS    26     -30.770  39.918  -0.491  1.00  1.00      1S   
ATOM    125 O    LYS    26     -30.822  38.705  -0.326  1.00  1.00      1S   
ATOM    126 N    THR    27     -31.663  40.767   0.069  1.00  1.00      1S   
ATOM    127 HN   THR    27     -31.593  41.752  -0.077  1.00  0.00      1S   
ATOM    128 CA   THR    27     -32.740  40.348   0.949  1.00  1.00      1S   
ATOM    129 HA   THR    27     -32.319  39.665   1.673  1.00  0.00      1S   
ATOM    130 CB   THR    27     -33.373  41.518   1.688  1.00  1.00      1S   
ATOM    131 HB   THR    27     -33.917  42.177   0.976  1.00  0.00      1S   
ATOM    132 OG1  THR    27     -32.367  42.307   2.309  1.00  1.00      1S   
ATOM    133 HG1  THR    27     -31.877  41.713   2.881  1.00  0.00      1S   
ATOM    134 CG2  THR    27     -34.341  41.030   2.783  1.00  1.00      1S   
ATOM    135 HG21 THR    27     -33.810  40.375   3.505  1.00  0.00      1S   
ATOM    136 HG22 THR    27     -35.186  40.460   2.345  1.00  0.00      1S   
ATOM    137 HG23 THR    27     -34.762  41.896   3.336  1.00  0.00      1S   
ATOM    138 C    THR    27     -33.806  39.609   0.167  1.00  1.00      1S   
ATOM    139 O    THR    27     -34.380  38.634   0.646  1.00  1.00      1S   
ATOM    140 N    PHE    28     -34.063  40.044  -1.087  1.00  1.00      1S   
ATOM    141 HN   PHE    28     -33.605  40.860  -1.438  1.00  0.00      1S   
ATOM    142 CA   PHE    28     -34.974  39.418  -2.018  1.00  1.00      1S   
ATOM    143 HA   PHE    28     -35.935  39.325  -1.530  1.00  0.00      1S   
ATOM    144 CB   PHE    28     -35.123  40.299  -3.290  1.00  1.00      1S   
ATOM    145 HB1  PHE    28     -34.120  40.574  -3.676  1.00  0.00      1S   
ATOM    146 HB2  PHE    28     -35.657  41.236  -3.027  1.00  0.00      1S   
ATOM    147 CG   PHE    28     -35.888  39.620  -4.393  1.00  1.00      1S   
ATOM    148 CD1  PHE    28     -37.248  39.305  -4.244  1.00  1.00      1S   
ATOM    149 HD1  PHE    28     -37.774  39.597  -3.347  1.00  0.00      1S   
ATOM    150 CE1  PHE    28     -37.918  38.583  -5.238  1.00  1.00      1S   
ATOM    151 HE1  PHE    28     -38.961  38.333  -5.116  1.00  0.00      1S   
ATOM    152 CZ   PHE    28     -37.230  38.167  -6.385  1.00  1.00      1S   
ATOM    153 HZ   PHE    28     -37.745  37.600  -7.144  1.00  0.00      1S   
ATOM    154 CD2  PHE    28     -35.206  39.199  -5.547  1.00  1.00      1S   
ATOM    155 HD2  PHE    28     -34.152  39.409  -5.657  1.00  0.00      1S   
ATOM    156 CE2  PHE    28     -35.872  38.471  -6.534  1.00  1.00      1S   
ATOM    157 HE2  PHE    28     -35.328  38.139  -7.404  1.00  0.00      1S   
ATOM    158 C    PHE    28     -34.494  38.027  -2.373  1.00  1.00      1S   
ATOM    159 O    PHE    28     -35.274  37.080  -2.349  1.00  1.00      1S   
ATOM    160 N    LEU    29     -33.191  37.875  -2.699  1.00  1.00      1S   
ATOM    161 HN   LEU    29     -32.577  38.662  -2.741  1.00  0.00      1S   
ATOM    162 CA   LEU    29     -32.591  36.603  -3.029  1.00  1.00      1S   
ATOM    163 HA   LEU    29     -33.213  36.124  -3.769  1.00  0.00      1S   
ATOM    164 CB   LEU    29     -31.155  36.750  -3.565  1.00  1.00      1S   
ATOM    165 HB1  LEU    29     -30.656  35.755  -3.612  1.00  0.00      1S   
ATOM    166 HB2  LEU    29     -30.573  37.388  -2.864  1.00  0.00      1S   
ATOM    167 CG   LEU    29     -31.102  37.365  -4.979  1.00  1.00      1S   
ATOM    168 HG   LEU    29     -31.704  38.301  -4.977  1.00  0.00      1S   
ATOM    169 CD1  LEU    29     -29.658  37.757  -5.335  1.00  1.00      1S   
ATOM    170 HD11 LEU    29     -29.004  36.861  -5.335  1.00  0.00      1S   
ATOM    171 HD12 LEU    29     -29.268  38.479  -4.586  1.00  0.00      1S   
ATOM    172 HD13 LEU    29     -29.622  38.231  -6.339  1.00  0.00      1S   
ATOM    173 CD2  LEU    29     -31.718  36.426  -6.034  1.00  1.00      1S   
ATOM    174 HD21 LEU    29     -32.812  36.319  -5.874  1.00  0.00      1S   
ATOM    175 HD22 LEU    29     -31.252  35.419  -5.971  1.00  0.00      1S   
ATOM    176 HD23 LEU    29     -31.555  36.832  -7.054  1.00  0.00      1S   
ATOM    177 C    LEU    29     -32.544  35.700  -1.837  1.00  1.00      1S   
ATOM    178 O    LEU    29     -32.710  34.493  -1.981  1.00  1.00      1S   
ATOM    179 N    ASP    30     -32.369  36.271  -0.622  1.00  1.00      1S   
ATOM    180 HN   ASP    30     -32.197  37.251  -0.537  1.00  0.00      1S   
ATOM    181 CA   ASP    30     -32.410  35.546   0.624  1.00  1.00      1S   
ATOM    182 HA   ASP    30     -31.662  34.769   0.538  1.00  0.00      1S   
ATOM    183 CB   ASP    30     -32.102  36.467   1.840  1.00  1.00      1S   
ATOM    184 HB1  ASP    30     -33.024  36.908   2.271  1.00  0.00      1S   
ATOM    185 HB2  ASP    30     -31.467  37.307   1.490  1.00  0.00      1S   
ATOM    186 CG   ASP    30     -31.310  35.756   2.938  1.00  1.00      1S   
ATOM    187 OD1  ASP    30     -31.269  34.499   2.949  1.00  1.00      1S   
ATOM    188 OD2  ASP    30     -30.717  36.483   3.780  1.00  1.00      1S   
ATOM    189 C    ASP    30     -33.765  34.894   0.767  1.00  1.00      1S   
ATOM    190 O    ASP    30     -33.854  33.699   0.985  1.00  1.00      1S   
ATOM    191 N    LYS    31     -34.864  35.645   0.540  1.00  1.00      1S   
ATOM    192 HN   LYS    31     -34.781  36.615   0.319  1.00  0.00      1S   
ATOM    193 CA   LYS    31     -36.212  35.120   0.567  1.00  1.00      1S   
ATOM    194 HA   LYS    31     -36.354  34.642   1.526  1.00  0.00      1S   
ATOM    195 CB   LYS    31     -37.233  36.273   0.414  1.00  1.00      1S   
ATOM    196 HB1  LYS    31     -36.910  36.925  -0.426  1.00  0.00      1S   
ATOM    197 HB2  LYS    31     -37.198  36.889   1.340  1.00  0.00      1S   
ATOM    198 CG   LYS    31     -38.690  35.858   0.154  1.00  1.00      1S   
ATOM    199 HG1  LYS    31     -38.750  35.239  -0.768  1.00  0.00      1S   
ATOM    200 HG2  LYS    31     -39.285  36.778  -0.036  1.00  0.00      1S   
ATOM    201 CD   LYS    31     -39.333  35.092   1.316  1.00  1.00      1S   
ATOM    202 HD1  LYS    31     -39.321  35.738   2.222  1.00  0.00      1S   
ATOM    203 HD2  LYS    31     -38.730  34.182   1.533  1.00  0.00      1S   
ATOM    204 CE   LYS    31     -40.768  34.679   0.989  1.00  1.00      1S   
ATOM    205 HE1  LYS    31     -40.791  34.057   0.068  1.00  0.00      1S   
ATOM    206 HE2  LYS    31     -41.411  35.572   0.844  1.00  0.00      1S   
ATOM    207 NZ   LYS    31     -41.335  33.877   2.090  1.00  1.00      1S   
ATOM    208 HZ1  LYS    31     -40.621  33.744   2.833  1.00  0.00      1S   
ATOM    209 HZ2  LYS    31     -41.611  32.938   1.711  1.00  0.00      1S   
ATOM    210 HZ3  LYS    31     -42.174  34.346   2.483  1.00  0.00      1S   
ATOM    211 C    LYS    31     -36.453  34.073  -0.505  1.00  1.00      1S   
ATOM    212 O    LYS    31     -37.021  33.018  -0.219  1.00  1.00      1S   
ATOM    213 N    PHE    32     -36.007  34.336  -1.760  1.00  1.00      1S   
ATOM    214 HN   PHE    32     -35.551  35.203  -1.957  1.00  0.00      1S   
ATOM    215 CA   PHE    32     -36.157  33.455  -2.901  1.00  1.00      1S   
ATOM    216 HA   PHE    32     -37.218  33.310  -3.057  1.00  0.00      1S   
ATOM    217 CB   PHE    32     -35.533  34.057  -4.200  1.00  1.00      1S   
ATOM    218 HB1  PHE    32     -34.500  34.402  -3.991  1.00  0.00      1S   
ATOM    219 HB2  PHE    32     -36.134  34.934  -4.524  1.00  0.00      1S   
ATOM    220 CG   PHE    32     -35.467  33.071  -5.351  1.00  1.00      1S   
ATOM    221 CD1  PHE    32     -36.582  32.841  -6.166  1.00  1.00      1S   
ATOM    222 HD1  PHE    32     -37.473  33.416  -5.999  1.00  0.00      1S   
ATOM    223 CE1  PHE    32     -36.547  31.869  -7.174  1.00  1.00      1S   
ATOM    224 HE1  PHE    32     -37.413  31.710  -7.798  1.00  0.00      1S   
ATOM    225 CZ   PHE    32     -35.397  31.092  -7.354  1.00  1.00      1S   
ATOM    226 HZ   PHE    32     -35.370  30.330  -8.119  1.00  0.00      1S   
ATOM    227 CD2  PHE    32     -34.312  32.294  -5.551  1.00  1.00      1S   
ATOM    228 HD2  PHE    32     -33.454  32.439  -4.912  1.00  0.00      1S   
ATOM    229 CE2  PHE    32     -34.284  31.297  -6.531  1.00  1.00      1S   
ATOM    230 HE2  PHE    32     -33.405  30.683  -6.644  1.00  0.00      1S   
ATOM    231 C    PHE    32     -35.552  32.103  -2.620  1.00  1.00      1S   
ATOM    232 O    PHE    32     -36.212  31.100  -2.847  1.00  1.00      1S   
ATOM    233 N    ASN    33     -34.291  32.053  -2.133  1.00  1.00      1S   
ATOM    234 HN   ASN    33     -33.791  32.899  -1.948  1.00  0.00      1S   
ATOM    235 CA   ASN    33     -33.533  30.836  -1.929  1.00  1.00      1S   
ATOM    236 HA   ASN    33     -33.423  30.354  -2.891  1.00  0.00      1S   
ATOM    237 CB   ASN    33     -32.140  31.115  -1.305  1.00  1.00      1S   
ATOM    238 HB1  ASN    33     -31.647  30.162  -1.015  1.00  0.00      1S   
ATOM    239 HB2  ASN    33     -32.264  31.744  -0.396  1.00  0.00      1S   
ATOM    240 CG   ASN    33     -31.223  31.823  -2.311  1.00  1.00      1S   
ATOM    241 OD1  ASN    33     -31.354  31.666  -3.529  1.00  1.00      1S   
ATOM    242 ND2  ASN    33     -30.246  32.612  -1.771  1.00  1.00      1S   
ATOM    243 HD21 ASN    33     -30.186  32.719  -0.778  1.00  0.00      1S   
ATOM    244 HD22 ASN    33     -29.625  33.107  -2.374  1.00  0.00      1S   
ATOM    245 C    ASN    33     -34.248  29.862  -1.026  1.00  1.00      1S   
ATOM    246 O    ASN    33     -34.302  28.672  -1.323  1.00  1.00      1S   
ATOM    247 N    HSE    34     -34.839  30.355   0.085  1.00  1.00      1S   
ATOM    248 HN   HSE    34     -34.800  31.329   0.304  1.00  0.00      1S   
ATOM    249 CA   HSE    34     -35.497  29.517   1.062  1.00  1.00      1S   
ATOM    250 HA   HSE    34     -34.868  28.653   1.230  1.00  0.00      1S   
ATOM    251 CB   HSE    34     -35.692  30.223   2.427  1.00  1.00      1S   
ATOM    252 HB1  HSE    34     -36.265  29.561   3.111  1.00  0.00      1S   
ATOM    253 HB2  HSE    34     -36.273  31.161   2.287  1.00  0.00      1S   
ATOM    254 ND1  HSE    34     -33.627  31.592   2.630  1.00  1.00      1S   
ATOM    255 CG   HSE    34     -34.381  30.549   3.106  1.00  1.00      1S   
ATOM    256 CE1  HSE    34     -32.554  31.638   3.385  1.00  1.00      1S   
ATOM    257 HE1  HSE    34     -31.748  32.361   3.274  1.00  0.00      1S   
ATOM    258 NE2  HSE    34     -32.567  30.669   4.330  1.00  1.00      1S   
ATOM    259 HE2  HSE    34     -31.867  30.498   5.021  1.00  0.00      1S   
ATOM    260 CD2  HSE    34     -33.741  29.961   4.156  1.00  1.00      1S   
ATOM    261 HD2  HSE    34     -34.027  29.117   4.763  1.00  0.00      1S   
ATOM    262 C    HSE    34     -36.820  29.014   0.537  1.00  1.00      1S   
ATOM    263 O    HSE    34     -37.157  27.847   0.734  1.00  1.00      1S   
ATOM    264 N    GLU    35     -37.589  29.865  -0.184  1.00  1.00      1S   
ATOM    265 HN   GLU    35     -37.317  30.814  -0.340  1.00  0.00      1S   
ATOM    266 CA   GLU    35     -38.862  29.470  -0.751  1.00  1.00      1S   
ATOM    267 HA   GLU    35     -39.395  28.952   0.030  1.00  0.00      1S   
ATOM    268 CB   GLU    35     -39.687  30.697  -1.218  1.00  1.00      1S   
ATOM    269 HB1  GLU    35     -39.451  30.933  -2.276  1.00  0.00      1S   
ATOM    270 HB2  GLU    35     -39.376  31.585  -0.624  1.00  0.00      1S   
ATOM    271 CG   GLU    35     -41.216  30.541  -1.070  1.00  1.00      1S   
ATOM    272 HG1  GLU    35     -41.577  29.652  -1.626  1.00  0.00      1S   
ATOM    273 HG2  GLU    35     -41.708  31.442  -1.498  1.00  0.00      1S   
ATOM    274 CD   GLU    35     -41.619  30.423   0.402  1.00  1.00      1S   
ATOM    275 OE1  GLU    35     -41.537  29.302   0.969  1.00  1.00      1S   
ATOM    276 OE2  GLU    35     -42.030  31.463   0.980  1.00  1.00      1S   
ATOM    277 C    GLU    35     -38.678  28.501  -1.899  1.00  1.00      1S   
ATOM    278 O    GLU    35     -39.412  27.522  -2.029  1.00  1.00      1S   
ATOM    279 N    ALA    36     -37.648  28.750  -2.741  1.00  1.00      1S   
ATOM    280 HN   ALA    36     -37.067  29.550  -2.596  1.00  0.00      1S   
ATOM    281 CA   ALA    36     -37.318  27.985  -3.915  1.00  1.00      1S   
ATOM    282 HA   ALA    36     -38.218  27.919  -4.506  1.00  0.00      1S   
ATOM    283 CB   ALA    36     -36.185  28.623  -4.743  1.00  1.00      1S   
ATOM    284 HB1  ALA    36     -35.253  28.709  -4.145  1.00  0.00      1S   
ATOM    285 HB2  ALA    36     -36.480  29.644  -5.063  1.00  0.00      1S   
ATOM    286 HB3  ALA    36     -35.969  28.024  -5.654  1.00  0.00      1S   
ATOM    287 C    ALA    36     -36.877  26.598  -3.578  1.00  1.00      1S   
ATOM    288 O    ALA    36     -37.266  25.655  -4.257  1.00  1.00      1S   
ATOM    289 N    GLU    37     -36.070  26.440  -2.506  1.00  1.00      1S   
ATOM    290 HN   GLU    37     -35.763  27.232  -1.981  1.00  0.00      1S   
ATOM    291 CA   GLU    37     -35.557  25.169  -2.050  1.00  1.00      1S   
ATOM    292 HA   GLU    37     -34.952  24.758  -2.847  1.00  0.00      1S   
ATOM    293 CB   GLU    37     -34.686  25.349  -0.784  1.00  1.00      1S   
ATOM    294 HB1  GLU    37     -35.333  25.714   0.045  1.00  0.00      1S   
ATOM    295 HB2  GLU    37     -33.945  26.154  -0.981  1.00  0.00      1S   
ATOM    296 CG   GLU    37     -33.959  24.073  -0.308  1.00  1.00      1S   
ATOM    297 HG1  GLU    37     -34.418  23.171  -0.765  1.00  0.00      1S   
ATOM    298 HG2  GLU    37     -34.062  23.989   0.795  1.00  0.00      1S   
ATOM    299 CD   GLU    37     -32.468  24.090  -0.642  1.00  1.00      1S   
ATOM    300 OE1  GLU    37     -32.003  23.125  -1.304  1.00  1.00      1S   
ATOM    301 OE2  GLU    37     -31.766  25.051  -0.227  1.00  1.00      1S   
ATOM    302 C    GLU    37     -36.675  24.197  -1.749  1.00  1.00      1S   
ATOM    303 O    GLU    37     -36.622  23.047  -2.176  1.00  1.00      1S   
ATOM    304 N    ASP    38     -37.736  24.652  -1.040  1.00  1.00      1S   
ATOM    305 HN   ASP    38     -37.790  25.599  -0.731  1.00  0.00      1S   
ATOM    306 CA   ASP    38     -38.842  23.803  -0.666  1.00  1.00      1S   
ATOM    307 HA   ASP    38     -38.416  22.870  -0.318  1.00  0.00      1S   
ATOM    308 CB   ASP    38     -39.686  24.417   0.479  1.00  1.00      1S   
ATOM    309 HB1  ASP    38     -40.280  25.280   0.114  1.00  0.00      1S   
ATOM    310 HB2  ASP    38     -39.006  24.779   1.280  1.00  0.00      1S   
ATOM    311 CG   ASP    38     -40.606  23.355   1.085  1.00  1.00      1S   
ATOM    312 OD1  ASP    38     -40.063  22.357   1.631  1.00  1.00      1S   
ATOM    313 OD2  ASP    38     -41.851  23.520   0.996  1.00  1.00      1S   
ATOM    314 C    ASP    38     -39.720  23.491  -1.860  1.00  1.00      1S   
ATOM    315 O    ASP    38     -40.088  22.339  -2.062  1.00  1.00      1S   
ATOM    316 N    LEU    39     -40.062  24.496  -2.697  1.00  1.00      1S   
ATOM    317 HN   LEU    39     -39.760  25.434  -2.534  1.00  0.00      1S   
ATOM    318 CA   LEU    39     -40.928  24.298  -3.842  1.00  1.00      1S   
ATOM    319 HA   LEU    39     -41.797  23.759  -3.496  1.00  0.00      1S   
ATOM    320 CB   LEU    39     -41.363  25.634  -4.474  1.00  1.00      1S   
ATOM    321 HB1  LEU    39     -41.675  25.483  -5.532  1.00  0.00      1S   
ATOM    322 HB2  LEU    39     -40.499  26.335  -4.472  1.00  0.00      1S   
ATOM    323 CG   LEU    39     -42.563  26.280  -3.755  1.00  1.00      1S   
ATOM    324 HG   LEU    39     -42.328  26.364  -2.669  1.00  0.00      1S   
ATOM    325 CD1  LEU    39     -42.796  27.695  -4.295  1.00  1.00      1S   
ATOM    326 HD11 LEU    39     -43.019  27.636  -5.380  1.00  0.00      1S   
ATOM    327 HD12 LEU    39     -41.891  28.322  -4.147  1.00  0.00      1S   
ATOM    328 HD13 LEU    39     -43.654  28.177  -3.781  1.00  0.00      1S   
ATOM    329 CD2  LEU    39     -43.837  25.428  -3.920  1.00  1.00      1S   
ATOM    330 HD21 LEU    39     -43.754  24.473  -3.361  1.00  0.00      1S   
ATOM    331 HD22 LEU    39     -44.002  25.195  -4.994  1.00  0.00      1S   
ATOM    332 HD23 LEU    39     -44.722  25.977  -3.538  1.00  0.00      1S   
ATOM    333 C    LEU    39     -40.307  23.440  -4.915  1.00  1.00      1S   
ATOM    334 O    LEU    39     -40.991  22.617  -5.523  1.00  1.00      1S   
ATOM    335 N    PHE    40     -38.983  23.581  -5.144  1.00  1.00      1S   
ATOM    336 HN   PHE    40     -38.449  24.277  -4.665  1.00  0.00      1S   
ATOM    337 CA   PHE    40     -38.229  22.740  -6.044  1.00  1.00      1S   
ATOM    338 HA   PHE    40     -38.743  22.734  -6.996  1.00  0.00      1S   
ATOM    339 CB   PHE    40     -36.781  23.267  -6.243  1.00  1.00      1S   
ATOM    340 HB1  PHE    40     -36.239  23.283  -5.273  1.00  0.00      1S   
ATOM    341 HB2  PHE    40     -36.819  24.307  -6.632  1.00  0.00      1S   
ATOM    342 CG   PHE    40     -35.997  22.438  -7.229  1.00  1.00      1S   
ATOM    343 CD1  PHE    40     -36.150  22.618  -8.613  1.00  1.00      1S   
ATOM    344 HD1  PHE    40     -36.823  23.374  -8.983  1.00  0.00      1S   
ATOM    345 CE1  PHE    40     -35.446  21.814  -9.518  1.00  1.00      1S   
ATOM    346 HE1  PHE    40     -35.569  21.960 -10.581  1.00  0.00      1S   
ATOM    347 CZ   PHE    40     -34.587  20.814  -9.044  1.00  1.00      1S   
ATOM    348 HZ   PHE    40     -34.051  20.183  -9.738  1.00  0.00      1S   
ATOM    349 CD2  PHE    40     -35.129  21.437  -6.765  1.00  1.00      1S   
ATOM    350 HD2  PHE    40     -35.019  21.278  -5.702  1.00  0.00      1S   
ATOM    351 CE2  PHE    40     -34.428  20.629  -7.665  1.00  1.00      1S   
ATOM    352 HE2  PHE    40     -33.779  19.852  -7.294  1.00  0.00      1S   
ATOM    353 C    PHE    40     -38.196  21.328  -5.507  1.00  1.00      1S   
ATOM    354 O    PHE    40     -38.310  20.380  -6.277  1.00  1.00      1S   
ATOM    355 N    TYR    41     -38.067  21.158  -4.170  1.00  1.00      1S   
ATOM    356 HN   TYR    41     -38.004  21.943  -3.556  1.00  0.00      1S   
ATOM    357 CA   TYR    41     -37.976  19.865  -3.531  1.00  1.00      1S   
ATOM    358 HA   TYR    41     -37.167  19.336  -4.018  1.00  0.00      1S   
ATOM    359 CB   TYR    41     -37.662  19.992  -2.020  1.00  1.00      1S   
ATOM    360 HB1  TYR    41     -38.515  20.429  -1.461  1.00  0.00      1S   
ATOM    361 HB2  TYR    41     -36.781  20.653  -1.886  1.00  0.00      1S   
ATOM    362 CG   TYR    41     -37.304  18.664  -1.419  1.00  1.00      1S   
ATOM    363 CD1  TYR    41     -36.008  18.154  -1.575  1.00  1.00      1S   
ATOM    364 HD1  TYR    41     -35.264  18.732  -2.102  1.00  0.00      1S   
ATOM    365 CE1  TYR    41     -35.669  16.906  -1.047  1.00  1.00      1S   
ATOM    366 HE1  TYR    41     -34.668  16.535  -1.174  1.00  0.00      1S   
ATOM    367 CZ   TYR    41     -36.625  16.155  -0.352  1.00  1.00      1S   
ATOM    368 OH   TYR    41     -36.298  14.889   0.174  1.00  1.00      1S   
ATOM    369 HH   TYR    41     -35.527  14.557  -0.303  1.00  0.00      1S   
ATOM    370 CD2  TYR    41     -38.259  17.907  -0.720  1.00  1.00      1S   
ATOM    371 HD2  TYR    41     -39.265  18.284  -0.605  1.00  0.00      1S   
ATOM    372 CE2  TYR    41     -37.919  16.661  -0.182  1.00  1.00      1S   
ATOM    373 HE2  TYR    41     -38.660  16.085   0.352  1.00  0.00      1S   
ATOM    374 C    TYR    41     -39.243  19.065  -3.725  1.00  1.00      1S   
ATOM    375 O    TYR    41     -39.171  17.884  -4.048  1.00  1.00      1S   
ATOM    376 N    GLN    42     -40.429  19.698  -3.560  1.00  1.00      1S   
ATOM    377 HN   GLN    42     -40.464  20.659  -3.288  1.00  0.00      1S   
ATOM    378 CA   GLN    42     -41.710  19.045  -3.731  1.00  1.00      1S   
ATOM    379 HA   GLN    42     -41.705  18.155  -3.118  1.00  0.00      1S   
ATOM    380 CB   GLN    42     -42.904  19.947  -3.332  1.00  1.00      1S   
ATOM    381 HB1  GLN    42     -43.860  19.401  -3.500  1.00  0.00      1S   
ATOM    382 HB2  GLN    42     -42.908  20.843  -3.994  1.00  0.00      1S   
ATOM    383 CG   GLN    42     -42.877  20.456  -1.876  1.00  1.00      1S   
ATOM    384 HG1  GLN    42     -43.676  21.220  -1.754  1.00  0.00      1S   
ATOM    385 HG2  GLN    42     -41.907  20.938  -1.658  1.00  0.00      1S   
ATOM    386 CD   GLN    42     -43.107  19.343  -0.845  1.00  1.00      1S   
ATOM    387 OE1  GLN    42     -43.228  18.155  -1.158  1.00  1.00      1S   
ATOM    388 NE2  GLN    42     -43.178  19.771   0.452  1.00  1.00      1S   
ATOM    389 HE21 GLN    42     -43.040  20.740   0.664  1.00  0.00      1S   
ATOM    390 HE22 GLN    42     -43.371  19.115   1.177  1.00  0.00      1S   
ATOM    391 C    GLN    42     -41.919  18.617  -5.161  1.00  1.00      1S   
ATOM    392 O    GLN    42     -42.395  17.514  -5.416  1.00  1.00      1S   
ATOM    393 N    SER    43     -41.529  19.482  -6.129  1.00  1.00      1S   
ATOM    394 HN   SER    43     -41.166  20.379  -5.884  1.00  0.00      1S   
ATOM    395 CA   SER    43     -41.606  19.211  -7.549  1.00  1.00      1S   
ATOM    396 HA   SER    43     -42.636  18.972  -7.772  1.00  0.00      1S   
ATOM    397 CB   SER    43     -41.181  20.441  -8.386  1.00  1.00      1S   
ATOM    398 HB1  SER    43     -40.088  20.622  -8.295  1.00  0.00      1S   
ATOM    399 HB2  SER    43     -41.714  21.338  -8.005  1.00  0.00      1S   
ATOM    400 OG   SER    43     -41.520  20.278  -9.759  1.00  1.00      1S   
ATOM    401 HG1  SER    43     -41.236  21.079 -10.205  1.00  0.00      1S   
ATOM    402 C    SER    43     -40.757  18.022  -7.934  1.00  1.00      1S   
ATOM    403 O    SER    43     -41.241  17.109  -8.596  1.00  1.00      1S   
ATOM    404 N    SER    44     -39.477  17.993  -7.491  1.00  1.00      1S   
ATOM    405 HN   SER    44     -39.098  18.760  -6.973  1.00  0.00      1S   
ATOM    406 CA   SER    44     -38.541  16.915  -7.745  1.00  1.00      1S   
ATOM    407 HA   SER    44     -38.462  16.791  -8.816  1.00  0.00      1S   
ATOM    408 CB   SER    44     -37.143  17.190  -7.153  1.00  1.00      1S   
ATOM    409 HB1  SER    44     -36.437  16.383  -7.446  1.00  0.00      1S   
ATOM    410 HB2  SER    44     -37.188  17.246  -6.043  1.00  0.00      1S   
ATOM    411 OG   SER    44     -36.635  18.419  -7.646  1.00  1.00      1S   
ATOM    412 HG1  SER    44     -36.008  18.740  -6.991  1.00  0.00      1S   
ATOM    413 C    SER    44     -39.011  15.621  -7.143  1.00  1.00      1S   
ATOM    414 O    SER    44     -38.807  14.556  -7.715  1.00  1.00      1S   
ATOM    415 N    LEU    45     -39.675  15.691  -5.970  1.00  1.00      1S   
ATOM    416 HN   LEU    45     -39.804  16.566  -5.505  1.00  0.00      1S   
ATOM    417 CA   LEU    45     -40.182  14.540  -5.271  1.00  1.00      1S   
ATOM    418 HA   LEU    45     -39.381  13.817  -5.278  1.00  0.00      1S   
ATOM    419 CB   LEU    45     -40.565  14.910  -3.822  1.00  1.00      1S   
ATOM    420 HB1  LEU    45     -41.507  15.499  -3.806  1.00  0.00      1S   
ATOM    421 HB2  LEU    45     -39.762  15.576  -3.432  1.00  0.00      1S   
ATOM    422 CG   LEU    45     -40.674  13.732  -2.831  1.00  1.00      1S   
ATOM    423 HG   LEU    45     -41.623  13.185  -3.031  1.00  0.00      1S   
ATOM    424 CD1  LEU    45     -39.512  12.728  -2.971  1.00  1.00      1S   
ATOM    425 HD11 LEU    45     -38.539  13.264  -2.950  1.00  0.00      1S   
ATOM    426 HD12 LEU    45     -39.590  12.167  -3.926  1.00  0.00      1S   
ATOM    427 HD13 LEU    45     -39.532  11.994  -2.139  1.00  0.00      1S   
ATOM    428 CD2  LEU    45     -40.729  14.288  -1.397  1.00  1.00      1S   
ATOM    429 HD21 LEU    45     -41.590  14.980  -1.280  1.00  0.00      1S   
ATOM    430 HD22 LEU    45     -39.796  14.848  -1.181  1.00  0.00      1S   
ATOM    431 HD23 LEU    45     -40.824  13.464  -0.660  1.00  0.00      1S   
ATOM    432 C    LEU    45     -41.366  13.937  -5.984  1.00  1.00      1S   
ATOM    433 O    LEU    45     -41.457  12.721  -6.122  1.00  1.00      1S   
ATOM    434 N    ALA    46     -42.287  14.783  -6.500  1.00  1.00      1S   
ATOM    435 HN   ALA    46     -42.206  15.771  -6.367  1.00  0.00      1S   
ATOM    436 CA   ALA    46     -43.441  14.352  -7.256  1.00  1.00      1S   
ATOM    437 HA   ALA    46     -43.930  13.565  -6.699  1.00  0.00      1S   
ATOM    438 CB   ALA    46     -44.437  15.504  -7.467  1.00  1.00      1S   
ATOM    439 HB1  ALA    46     -43.969  16.340  -8.030  1.00  0.00      1S   
ATOM    440 HB2  ALA    46     -44.777  15.896  -6.484  1.00  0.00      1S   
ATOM    441 HB3  ALA    46     -45.331  15.151  -8.021  1.00  0.00      1S   
ATOM    442 C    ALA    46     -43.034  13.795  -8.602  1.00  1.00      1S   
ATOM    443 O    ALA    46     -43.595  12.806  -9.069  1.00  1.00      1S   
ATOM    444 N    SER    47     -41.999  14.401  -9.230  1.00  1.00      1S   
ATOM    445 HN   SER    47     -41.590  15.226  -8.841  1.00  0.00      1S   
ATOM    446 CA   SER    47     -41.396  13.944 -10.463  1.00  1.00      1S   
ATOM    447 HA   SER    47     -42.187  13.819 -11.185  1.00  0.00      1S   
ATOM    448 CB   SER    47     -40.368  14.974 -11.006  1.00  1.00      1S   
ATOM    449 HB1  SER    47     -39.562  15.142 -10.262  1.00  0.00      1S   
ATOM    450 HB2  SER    47     -40.890  15.940 -11.175  1.00  0.00      1S   
ATOM    451 OG   SER    47     -39.787  14.568 -12.241  1.00  1.00      1S   
ATOM    452 HG1  SER    47     -39.149  15.245 -12.481  1.00  0.00      1S   
ATOM    453 C    SER    47     -40.742  12.597 -10.275  1.00  1.00      1S   
ATOM    454 O    SER    47     -40.844  11.734 -11.142  1.00  1.00      1S   
ATOM    455 N    TRP    48     -40.086  12.370  -9.115  1.00  1.00      1S   
ATOM    456 HN   TRP    48     -40.010  13.086  -8.422  1.00  0.00      1S   
ATOM    457 CA   TRP    48     -39.440  11.121  -8.785  1.00  1.00      1S   
ATOM    458 HA   TRP    48     -38.762  10.878  -9.592  1.00  0.00      1S   
ATOM    459 CB   TRP    48     -38.626  11.218  -7.463  1.00  1.00      1S   
ATOM    460 HB1  TRP    48     -39.281  11.630  -6.666  1.00  0.00      1S   
ATOM    461 HB2  TRP    48     -37.792  11.936  -7.617  1.00  0.00      1S   
ATOM    462 CG   TRP    48     -38.061   9.898  -6.965  1.00  1.00      1S   
ATOM    463 CD1  TRP    48     -38.669   8.986  -6.147  1.00  1.00      1S   
ATOM    464 HD1  TRP    48     -39.632   9.128  -5.682  1.00  0.00      1S   
ATOM    465 NE1  TRP    48     -37.886   7.865  -6.019  1.00  1.00      1S   
ATOM    466 HE1  TRP    48     -38.115   7.064  -5.506  1.00  0.00      1S   
ATOM    467 CE2  TRP    48     -36.750   8.034  -6.775  1.00  1.00      1S   
ATOM    468 CD2  TRP    48     -36.828   9.299  -7.398  1.00  1.00      1S   
ATOM    469 CE3  TRP    48     -35.829   9.746  -8.252  1.00  1.00      1S   
ATOM    470 HE3  TRP    48     -35.883  10.703  -8.744  1.00  0.00      1S   
ATOM    471 CZ3  TRP    48     -34.722   8.910  -8.456  1.00  1.00      1S   
ATOM    472 HZ3  TRP    48     -33.920   9.237  -9.099  1.00  0.00      1S   
ATOM    473 CZ2  TRP    48     -35.659   7.201  -6.993  1.00  1.00      1S   
ATOM    474 HZ2  TRP    48     -35.590   6.227  -6.532  1.00  0.00      1S   
ATOM    475 CH2  TRP    48     -34.642   7.654  -7.839  1.00  1.00      1S   
ATOM    476 HH2  TRP    48     -33.782   7.027  -8.022  1.00  0.00      1S   
ATOM    477 C    TRP    48     -40.451  10.003  -8.677  1.00  1.00      1S   
ATOM    478 O    TRP    48     -40.217   8.913  -9.194  1.00  1.00      1S   
ATOM    479 N    ASN    49     -41.597  10.250  -8.001  1.00  1.00      1S   
ATOM    480 HN   ASN    49     -41.773  11.145  -7.595  1.00  0.00      1S   
ATOM    481 CA   ASN    49     -42.600   9.236  -7.757  1.00  1.00      1S   
ATOM    482 HA   ASN    49     -42.093   8.359  -7.374  1.00  0.00      1S   
ATOM    483 CB   ASN    49     -43.679   9.681  -6.742  1.00  1.00      1S   
ATOM    484 HB1  ASN    49     -44.451   8.889  -6.630  1.00  0.00      1S   
ATOM    485 HB2  ASN    49     -44.170  10.612  -7.096  1.00  0.00      1S   
ATOM    486 CG   ASN    49     -43.028   9.904  -5.372  1.00  1.00      1S   
ATOM    487 OD1  ASN    49     -42.156   9.138  -4.947  1.00  1.00      1S   
ATOM    488 ND2  ASN    49     -43.476  10.978  -4.658  1.00  1.00      1S   
ATOM    489 HD21 ASN    49     -43.077  11.173  -3.766  1.00  0.00      1S   
ATOM    490 HD22 ASN    49     -44.176  11.577  -5.047  1.00  0.00      1S   
ATOM    491 C    ASN    49     -43.280   8.822  -9.036  1.00  1.00      1S   
ATOM    492 O    ASN    49     -43.645   7.663  -9.188  1.00  1.00      1S   
ATOM    493 N    TYR    50     -43.417   9.742 -10.017  1.00  1.00      1S   
ATOM    494 HN   TYR    50     -43.156  10.695  -9.873  1.00  0.00      1S   
ATOM    495 CA   TYR    50     -43.887   9.407 -11.342  1.00  1.00      1S   
ATOM    496 HA   TYR    50     -44.787   8.820 -11.239  1.00  0.00      1S   
ATOM    497 CB   TYR    50     -44.205  10.690 -12.164  1.00  1.00      1S   
ATOM    498 HB1  TYR    50     -43.336  11.382 -12.137  1.00  0.00      1S   
ATOM    499 HB2  TYR    50     -45.079  11.212 -11.721  1.00  0.00      1S   
ATOM    500 CG   TYR    50     -44.529  10.369 -13.602  1.00  1.00      1S   
ATOM    501 CD1  TYR    50     -45.685   9.647 -13.930  1.00  1.00      1S   
ATOM    502 HD1  TYR    50     -46.393   9.376 -13.161  1.00  0.00      1S   
ATOM    503 CE1  TYR    50     -45.911   9.242 -15.249  1.00  1.00      1S   
ATOM    504 HE1  TYR    50     -46.807   8.689 -15.484  1.00  0.00      1S   
ATOM    505 CZ   TYR    50     -44.995   9.568 -16.257  1.00  1.00      1S   
ATOM    506 OH   TYR    50     -45.251   9.202 -17.595  1.00  1.00      1S   
ATOM    507 HH   TYR    50     -46.154   8.879 -17.646  1.00  0.00      1S   
ATOM    508 CD2  TYR    50     -43.597  10.661 -14.613  1.00  1.00      1S   
ATOM    509 HD2  TYR    50     -42.683  11.177 -14.362  1.00  0.00      1S   
ATOM    510 CE2  TYR    50     -43.826  10.266 -15.934  1.00  1.00      1S   
ATOM    511 HE2  TYR    50     -43.102  10.505 -16.700  1.00  0.00      1S   
ATOM    512 C    TYR    50     -42.880   8.543 -12.077  1.00  1.00      1S   
ATOM    513 O    TYR    50     -43.247   7.541 -12.684  1.00  1.00      1S   
ATOM    514 N    ASN    51     -41.588   8.928 -12.060  1.00  1.00      1S   
ATOM    515 HN   ASN    51     -41.291   9.714 -11.519  1.00  0.00      1S   
ATOM    516 CA   ASN    51     -40.580   8.314 -12.895  1.00  1.00      1S   
ATOM    517 HA   ASN    51     -41.008   8.165 -13.878  1.00  0.00      1S   
ATOM    518 CB   ASN    51     -39.322   9.212 -13.011  1.00  1.00      1S   
ATOM    519 HB1  ASN    51     -38.421   8.605 -13.243  1.00  0.00      1S   
ATOM    520 HB2  ASN    51     -39.142   9.753 -12.059  1.00  0.00      1S   
ATOM    521 CG   ASN    51     -39.490  10.192 -14.179  1.00  1.00      1S   
ATOM    522 OD1  ASN    51     -39.170   9.848 -15.321  1.00  1.00      1S   
ATOM    523 ND2  ASN    51     -39.996  11.426 -13.898  1.00  1.00      1S   
ATOM    524 HD21 ASN    51     -40.260  11.658 -12.958  1.00  0.00      1S   
ATOM    525 HD22 ASN    51     -40.118  12.085 -14.636  1.00  0.00      1S   
ATOM    526 C    ASN    51     -40.179   6.941 -12.406  1.00  1.00      1S   
ATOM    527 O    ASN    51     -39.580   6.176 -13.157  1.00  1.00      1S   
ATOM    528 N    THR    52     -40.522   6.584 -11.151  1.00  1.00      1S   
ATOM    529 HN   THR    52     -40.997   7.222 -10.549  1.00  0.00      1S   
ATOM    530 CA   THR    52     -40.239   5.282 -10.591  1.00  1.00      1S   
ATOM    531 HA   THR    52     -39.549   4.748 -11.229  1.00  0.00      1S   
ATOM    532 CB   THR    52     -39.599   5.380  -9.213  1.00  1.00      1S   
ATOM    533 HB   THR    52     -39.489   4.366  -8.774  1.00  0.00      1S   
ATOM    534 OG1  THR    52     -40.363   6.164  -8.303  1.00  1.00      1S   
ATOM    535 HG1  THR    52     -40.251   7.078  -8.584  1.00  0.00      1S   
ATOM    536 CG2  THR    52     -38.194   5.996  -9.361  1.00  1.00      1S   
ATOM    537 HG21 THR    52     -38.249   7.034  -9.752  1.00  0.00      1S   
ATOM    538 HG22 THR    52     -37.580   5.390 -10.060  1.00  0.00      1S   
ATOM    539 HG23 THR    52     -37.683   6.016  -8.377  1.00  0.00      1S   
ATOM    540 C    THR    52     -41.496   4.446 -10.517  1.00  1.00      1S   
ATOM    541 O    THR    52     -41.431   3.284 -10.127  1.00  1.00      1S   
ATOM    542 N    ASN    53     -42.668   5.015 -10.881  1.00  1.00      1S   
ATOM    543 HN   ASN    53     -42.703   5.929 -11.282  1.00  0.00      1S   
ATOM    544 CA   ASN    53     -43.942   4.377 -10.656  1.00  1.00      1S   
ATOM    545 HA   ASN    53     -43.884   3.348 -10.985  1.00  0.00      1S   
ATOM    546 CB   ASN    53     -44.340   4.462  -9.153  1.00  1.00      1S   
ATOM    547 HB1  ASN    53     -44.464   5.519  -8.851  1.00  0.00      1S   
ATOM    548 HB2  ASN    53     -43.511   4.038  -8.546  1.00  0.00      1S   
ATOM    549 CG   ASN    53     -45.618   3.697  -8.799  1.00  1.00      1S   
ATOM    550 OD1  ASN    53     -46.183   2.953  -9.605  1.00  1.00      1S   
ATOM    551 ND2  ASN    53     -46.074   3.904  -7.526  1.00  1.00      1S   
ATOM    552 HD21 ASN    53     -46.905   3.446  -7.218  1.00  0.00      1S   
ATOM    553 HD22 ASN    53     -45.565   4.505  -6.909  1.00  0.00      1S   
ATOM    554 C    ASN    53     -44.927   5.118 -11.530  1.00  1.00      1S   
ATOM    555 O    ASN    53     -45.555   6.085 -11.105  1.00  1.00      1S   
ATOM    556 N    ILE    54     -45.070   4.684 -12.802  1.00  1.00      1S   
ATOM    557 HN   ILE    54     -44.561   3.888 -13.127  1.00  0.00      1S   
ATOM    558 CA   ILE    54     -45.857   5.370 -13.805  1.00  1.00      1S   
ATOM    559 HA   ILE    54     -45.727   6.436 -13.670  1.00  0.00      1S   
ATOM    560 CB   ILE    54     -45.415   5.008 -15.223  1.00  1.00      1S   
ATOM    561 HB   ILE    54     -45.503   3.905 -15.357  1.00  0.00      1S   
ATOM    562 CG2  ILE    54     -46.316   5.686 -16.283  1.00  1.00      1S   
ATOM    563 HG21 ILE    54     -46.244   6.786 -16.198  1.00  0.00      1S   
ATOM    564 HG22 ILE    54     -47.378   5.387 -16.171  1.00  0.00      1S   
ATOM    565 HG23 ILE    54     -46.001   5.399 -17.307  1.00  0.00      1S   
ATOM    566 CG1  ILE    54     -43.923   5.382 -15.416  1.00  1.00      1S   
ATOM    567 HG11 ILE    54     -43.307   4.829 -14.675  1.00  0.00      1S   
ATOM    568 HG12 ILE    54     -43.786   6.468 -15.216  1.00  0.00      1S   
ATOM    569 CD   ILE    54     -43.390   5.054 -16.812  1.00  1.00      1S   
ATOM    570 HD1  ILE    54     -43.709   5.829 -17.542  1.00  0.00      1S   
ATOM    571 HD2  ILE    54     -43.765   4.066 -17.151  1.00  0.00      1S   
ATOM    572 HD3  ILE    54     -42.282   5.015 -16.803  1.00  0.00      1S   
ATOM    573 C    ILE    54     -47.310   5.026 -13.591  1.00  1.00      1S   
ATOM    574 O    ILE    54     -47.753   3.922 -13.906  1.00  1.00      1S   
ATOM    575 N    THR    55     -48.081   5.985 -13.023  1.00  1.00      1S   
ATOM    576 HN   THR    55     -47.698   6.866 -12.758  1.00  0.00      1S   
ATOM    577 CA   THR    55     -49.499   5.832 -12.782  1.00  1.00      1S   
ATOM    578 HA   THR    55     -49.885   5.051 -13.422  1.00  0.00      1S   
ATOM    579 CB   THR    55     -49.877   5.523 -11.327  1.00  1.00      1S   
ATOM    580 HB   THR    55     -50.963   5.288 -11.273  1.00  0.00      1S   
ATOM    581 OG1  THR    55     -49.621   6.606 -10.440  1.00  1.00      1S   
ATOM    582 HG1  THR    55     -49.901   6.313  -9.569  1.00  0.00      1S   
ATOM    583 CG2  THR    55     -49.077   4.305 -10.832  1.00  1.00      1S   
ATOM    584 HG21 THR    55     -47.995   4.549 -10.759  1.00  0.00      1S   
ATOM    585 HG22 THR    55     -49.198   3.451 -11.530  1.00  0.00      1S   
ATOM    586 HG23 THR    55     -49.427   3.993  -9.825  1.00  0.00      1S   
ATOM    587 C    THR    55     -50.132   7.127 -13.207  1.00  1.00      1S   
ATOM    588 O    THR    55     -49.454   8.147 -13.275  1.00  1.00      1S   
ATOM    589 N    GLU    56     -51.462   7.124 -13.462  1.00  1.00      1S   
ATOM    590 HN   GLU    56     -51.995   6.284 -13.410  1.00  0.00      1S   
ATOM    591 CA   GLU    56     -52.208   8.307 -13.846  1.00  1.00      1S   
ATOM    592 HA   GLU    56     -51.677   8.777 -14.662  1.00  0.00      1S   
ATOM    593 CB   GLU    56     -53.643   7.958 -14.310  1.00  1.00      1S   
ATOM    594 HB1  GLU    56     -54.148   7.361 -13.519  1.00  0.00      1S   
ATOM    595 HB2  GLU    56     -53.564   7.311 -15.212  1.00  0.00      1S   
ATOM    596 CG   GLU    56     -54.546   9.165 -14.654  1.00  1.00      1S   
ATOM    597 HG1  GLU    56     -54.785   9.734 -13.730  1.00  0.00      1S   
ATOM    598 HG2  GLU    56     -55.500   8.796 -15.084  1.00  0.00      1S   
ATOM    599 CD   GLU    56     -53.886  10.111 -15.661  1.00  1.00      1S   
ATOM    600 OE1  GLU    56     -53.263   9.612 -16.636  1.00  1.00      1S   
ATOM    601 OE2  GLU    56     -54.003  11.350 -15.464  1.00  1.00      1S   
ATOM    602 C    GLU    56     -52.284   9.297 -12.714  1.00  1.00      1S   
ATOM    603 O    GLU    56     -52.146  10.501 -12.924  1.00  1.00      1S   
ATOM    604 N    GLU    57     -52.447   8.801 -11.463  1.00  1.00      1S   
ATOM    605 HN   GLU    57     -52.573   7.825 -11.308  1.00  0.00      1S   
ATOM    606 CA   GLU    57     -52.403   9.622 -10.274  1.00  1.00      1S   
ATOM    607 HA   GLU    57     -53.185  10.365 -10.364  1.00  0.00      1S   
ATOM    608 CB   GLU    57     -52.651   8.801  -8.981  1.00  1.00      1S   
ATOM    609 HB1  GLU    57     -51.964   7.927  -8.971  1.00  0.00      1S   
ATOM    610 HB2  GLU    57     -53.693   8.414  -9.008  1.00  0.00      1S   
ATOM    611 CG   GLU    57     -52.453   9.610  -7.680  1.00  1.00      1S   
ATOM    612 HG1  GLU    57     -53.110  10.506  -7.685  1.00  0.00      1S   
ATOM    613 HG2  GLU    57     -51.396   9.940  -7.619  1.00  0.00      1S   
ATOM    614 CD   GLU    57     -52.725   8.786  -6.423  1.00  1.00      1S   
ATOM    615 OE1  GLU    57     -53.251   9.378  -5.442  1.00  1.00      1S   
ATOM    616 OE2  GLU    57     -52.384   7.575  -6.415  1.00  1.00      1S   
ATOM    617 C    GLU    57     -51.080  10.354 -10.182  1.00  1.00      1S   
ATOM    618 O    GLU    57     -51.058  11.546  -9.907  1.00  1.00      1S   
ATOM    619 N    ASN    58     -49.943   9.680 -10.463  1.00  1.00      1S   
ATOM    620 HN   ASN    58     -49.964   8.723 -10.748  1.00  0.00      1S   
ATOM    621 CA   ASN    58     -48.629  10.271 -10.325  1.00  1.00      1S   
ATOM    622 HA   ASN    58     -48.620  10.824  -9.395  1.00  0.00      1S   
ATOM    623 CB   ASN    58     -47.506   9.212 -10.301  1.00  1.00      1S   
ATOM    624 HB1  ASN    58     -46.520   9.698 -10.442  1.00  0.00      1S   
ATOM    625 HB2  ASN    58     -47.665   8.473 -11.114  1.00  0.00      1S   
ATOM    626 CG   ASN    58     -47.478   8.522  -8.932  1.00  1.00      1S   
ATOM    627 OD1  ASN    58     -47.786   9.134  -7.904  1.00  1.00      1S   
ATOM    628 ND2  ASN    58     -47.075   7.219  -8.915  1.00  1.00      1S   
ATOM    629 HD21 ASN    58     -46.785   6.776  -9.767  1.00  0.00      1S   
ATOM    630 HD22 ASN    58     -47.074   6.715  -8.056  1.00  0.00      1S   
ATOM    631 C    ASN    58     -48.312  11.289 -11.391  1.00  1.00      1S   
ATOM    632 O    ASN    58     -47.592  12.244 -11.105  1.00  1.00      1S   
ATOM    633 N    VAL    59     -48.873  11.159 -12.623  1.00  1.00      1S   
ATOM    634 HN   VAL    59     -49.407  10.351 -12.861  1.00  0.00      1S   
ATOM    635 CA   VAL    59     -48.797  12.185 -13.656  1.00  1.00      1S   
ATOM    636 HA   VAL    59     -47.750  12.376 -13.850  1.00  0.00      1S   
ATOM    637 CB   VAL    59     -49.494  11.798 -14.965  1.00  1.00      1S   
ATOM    638 HB   VAL    59     -50.583  11.656 -14.782  1.00  0.00      1S   
ATOM    639 CG1  VAL    59     -49.293  12.887 -16.036  1.00  1.00      1S   
ATOM    640 HG11 VAL    59     -48.218  13.162 -16.111  1.00  0.00      1S   
ATOM    641 HG12 VAL    59     -49.887  13.786 -15.792  1.00  0.00      1S   
ATOM    642 HG13 VAL    59     -49.627  12.514 -17.028  1.00  0.00      1S   
ATOM    643 CG2  VAL    59     -48.932  10.485 -15.527  1.00  1.00      1S   
ATOM    644 HG21 VAL    59     -48.776   9.730 -14.742  1.00  0.00      1S   
ATOM    645 HG22 VAL    59     -47.958  10.679 -16.022  1.00  0.00      1S   
ATOM    646 HG23 VAL    59     -49.628  10.066 -16.285  1.00  0.00      1S   
ATOM    647 C    VAL    59     -49.431  13.461 -13.134  1.00  1.00      1S   
ATOM    648 O    VAL    59     -48.897  14.550 -13.325  1.00  1.00      1S   
ATOM    649 N    GLN    60     -50.568  13.334 -12.408  1.00  1.00      1S   
ATOM    650 HN   GLN    60     -50.963  12.432 -12.239  1.00  0.00      1S   
ATOM    651 CA   GLN    60     -51.295  14.445 -11.838  1.00  1.00      1S   
ATOM    652 HA   GLN    60     -51.428  15.159 -12.636  1.00  0.00      1S   
ATOM    653 CB   GLN    60     -52.682  14.032 -11.276  1.00  1.00      1S   
ATOM    654 HB1  GLN    60     -52.965  14.669 -10.408  1.00  0.00      1S   
ATOM    655 HB2  GLN    60     -52.634  12.988 -10.907  1.00  0.00      1S   
ATOM    656 CG   GLN    60     -53.817  14.116 -12.313  1.00  1.00      1S   
ATOM    657 HG1  GLN    60     -54.781  13.832 -11.840  1.00  0.00      1S   
ATOM    658 HG2  GLN    60     -53.615  13.417 -13.153  1.00  0.00      1S   
ATOM    659 CD   GLN    60     -53.918  15.543 -12.864  1.00  1.00      1S   
ATOM    660 OE1  GLN    60     -53.701  15.774 -14.057  1.00  1.00      1S   
ATOM    661 NE2  GLN    60     -54.220  16.522 -11.960  1.00  1.00      1S   
ATOM    662 HE21 GLN    60     -54.215  17.477 -12.252  1.00  0.00      1S   
ATOM    663 HE22 GLN    60     -54.411  16.280 -11.009  1.00  0.00      1S   
ATOM    664 C    GLN    60     -50.520  15.171 -10.767  1.00  1.00      1S   
ATOM    665 O    GLN    60     -50.363  16.385 -10.865  1.00  1.00      1S   
ATOM    666 N    ASN    61     -49.998  14.464  -9.733  1.00  1.00      1S   
ATOM    667 HN   ASN    61     -50.153  13.480  -9.661  1.00  0.00      1S   
ATOM    668 CA   ASN    61     -49.227  15.074  -8.656  1.00  1.00      1S   
ATOM    669 HA   ASN    61     -49.851  15.827  -8.194  1.00  0.00      1S   
ATOM    670 CB   ASN    61     -48.727  14.079  -7.575  1.00  1.00      1S   
ATOM    671 HB1  ASN    61     -48.125  14.626  -6.815  1.00  0.00      1S   
ATOM    672 HB2  ASN    61     -48.082  13.300  -8.033  1.00  0.00      1S   
ATOM    673 CG   ASN    61     -49.889  13.419  -6.827  1.00  1.00      1S   
ATOM    674 OD1  ASN    61     -50.334  13.898  -5.781  1.00  1.00      1S   
ATOM    675 ND2  ASN    61     -50.368  12.270  -7.366  1.00  1.00      1S   
ATOM    676 HD21 ASN    61     -51.103  11.772  -6.910  1.00  0.00      1S   
ATOM    677 HD22 ASN    61     -50.050  11.966  -8.267  1.00  0.00      1S   
ATOM    678 C    ASN    61     -47.985  15.757  -9.181  1.00  1.00      1S   
ATOM    679 O    ASN    61     -47.604  16.819  -8.693  1.00  1.00      1S   
ATOM    680 N    MET    62     -47.348  15.161 -10.218  1.00  1.00      1S   
ATOM    681 HN   MET    62     -47.681  14.296 -10.592  1.00  0.00      1S   
ATOM    682 CA   MET    62     -46.174  15.698 -10.866  1.00  1.00      1S   
ATOM    683 HA   MET    62     -45.438  15.897 -10.103  1.00  0.00      1S   
ATOM    684 CB   MET    62     -45.573  14.705 -11.886  1.00  1.00      1S   
ATOM    685 HB1  MET    62     -46.330  14.458 -12.663  1.00  0.00      1S   
ATOM    686 HB2  MET    62     -45.328  13.762 -11.348  1.00  0.00      1S   
ATOM    687 CG   MET    62     -44.295  15.226 -12.566  1.00  1.00      1S   
ATOM    688 HG1  MET    62     -43.565  15.475 -11.764  1.00  0.00      1S   
ATOM    689 HG2  MET    62     -44.522  16.170 -13.104  1.00  0.00      1S   
ATOM    690 SD   MET    62     -43.552  14.056 -13.735  1.00  1.00      1S   
ATOM    691 CE   MET    62     -42.191  15.151 -14.228  1.00  1.00      1S   
ATOM    692 HE1  MET    62     -41.854  15.774 -13.373  1.00  0.00      1S   
ATOM    693 HE2  MET    62     -42.498  15.838 -15.044  1.00  0.00      1S   
ATOM    694 HE3  MET    62     -41.320  14.559 -14.582  1.00  0.00      1S   
ATOM    695 C    MET    62     -46.480  16.998 -11.565  1.00  1.00      1S   
ATOM    696 O    MET    62     -45.716  17.955 -11.456  1.00  1.00      1S   
ATOM    697 N    ASN    63     -47.625  17.069 -12.283  1.00  1.00      1S   
ATOM    698 HN   ASN    63     -48.241  16.285 -12.352  1.00  0.00      1S   
ATOM    699 CA   ASN    63     -48.026  18.247 -13.016  1.00  1.00      1S   
ATOM    700 HA   ASN    63     -47.173  18.592 -13.585  1.00  0.00      1S   
ATOM    701 CB   ASN    63     -49.222  17.991 -13.964  1.00  1.00      1S   
ATOM    702 HB1  ASN    63     -49.633  18.951 -14.347  1.00  0.00      1S   
ATOM    703 HB2  ASN    63     -50.026  17.452 -13.419  1.00  0.00      1S   
ATOM    704 CG   ASN    63     -48.749  17.177 -15.172  1.00  1.00      1S   
ATOM    705 OD1  ASN    63     -47.626  17.340 -15.660  1.00  1.00      1S   
ATOM    706 ND2  ASN    63     -49.648  16.287 -15.681  1.00  1.00      1S   
ATOM    707 HD21 ASN    63     -49.382  15.717 -16.455  1.00  0.00      1S   
ATOM    708 HD22 ASN    63     -50.527  16.149 -15.225  1.00  0.00      1S   
ATOM    709 C    ASN    63     -48.397  19.368 -12.087  1.00  1.00      1S   
ATOM    710 O    ASN    63     -48.021  20.506 -12.339  1.00  1.00      1S   
ATOM    711 N    ASN    64     -49.110  19.081 -10.975  1.00  1.00      1S   
ATOM    712 HN   ASN    64     -49.409  18.147 -10.782  1.00  0.00      1S   
ATOM    713 CA   ASN    64     -49.551  20.095 -10.039  1.00  1.00      1S   
ATOM    714 HA   ASN    64     -50.045  20.872 -10.609  1.00  0.00      1S   
ATOM    715 CB   ASN    64     -50.525  19.557  -8.962  1.00  1.00      1S   
ATOM    716 HB1  ASN    64     -50.848  20.388  -8.297  1.00  0.00      1S   
ATOM    717 HB2  ASN    64     -50.019  18.782  -8.348  1.00  0.00      1S   
ATOM    718 CG   ASN    64     -51.777  18.960  -9.617  1.00  1.00      1S   
ATOM    719 OD1  ASN    64     -52.194  19.353 -10.711  1.00  1.00      1S   
ATOM    720 ND2  ASN    64     -52.401  17.975  -8.903  1.00  1.00      1S   
ATOM    721 HD21 ASN    64     -53.216  17.542  -9.278  1.00  0.00      1S   
ATOM    722 HD22 ASN    64     -52.032  17.692  -8.017  1.00  0.00      1S   
ATOM    723 C    ASN    64     -48.378  20.728  -9.331  1.00  1.00      1S   
ATOM    724 O    ASN    64     -48.282  21.949  -9.276  1.00  1.00      1S   
ATOM    725 N    ALA    65     -47.432  19.915  -8.803  1.00  1.00      1S   
ATOM    726 HN   ALA    65     -47.511  18.921  -8.863  1.00  0.00      1S   
ATOM    727 CA   ALA    65     -46.261  20.406  -8.103  1.00  1.00      1S   
ATOM    728 HA   ALA    65     -46.599  21.105  -7.350  1.00  0.00      1S   
ATOM    729 CB   ALA    65     -45.500  19.266  -7.405  1.00  1.00      1S   
ATOM    730 HB1  ALA    65     -45.157  18.509  -8.142  1.00  0.00      1S   
ATOM    731 HB2  ALA    65     -46.167  18.761  -6.673  1.00  0.00      1S   
ATOM    732 HB3  ALA    65     -44.619  19.658  -6.853  1.00  0.00      1S   
ATOM    733 C    ALA    65     -45.311  21.143  -9.025  1.00  1.00      1S   
ATOM    734 O    ALA    65     -44.664  22.105  -8.613  1.00  1.00      1S   
ATOM    735 N    GLY    66     -45.245  20.731 -10.314  1.00  1.00      1S   
ATOM    736 HN   GLY    66     -45.752  19.928 -10.623  1.00  0.00      1S   
ATOM    737 CA   GLY    66     -44.466  21.402 -11.333  1.00  1.00      1S   
ATOM    738 HA1  GLY    66     -44.463  20.760 -12.202  1.00  0.00      1S   
ATOM    739 HA2  GLY    66     -43.478  21.586 -10.938  1.00  0.00      1S   
ATOM    740 C    GLY    66     -45.066  22.723 -11.730  1.00  1.00      1S   
ATOM    741 O    GLY    66     -44.337  23.666 -12.027  1.00  1.00      1S   
ATOM    742 N    ASP    67     -46.415  22.828 -11.727  1.00  1.00      1S   
ATOM    743 HN   ASP    67     -46.986  22.030 -11.538  1.00  0.00      1S   
ATOM    744 CA   ASP    67     -47.149  24.040 -12.028  1.00  1.00      1S   
ATOM    745 HA   ASP    67     -46.735  24.468 -12.932  1.00  0.00      1S   
ATOM    746 CB   ASP    67     -48.672  23.794 -12.204  1.00  1.00      1S   
ATOM    747 HB1  ASP    67     -49.236  24.750 -12.149  1.00  0.00      1S   
ATOM    748 HB2  ASP    67     -49.037  23.126 -11.396  1.00  0.00      1S   
ATOM    749 CG   ASP    67     -48.996  23.153 -13.557  1.00  1.00      1S   
ATOM    750 OD1  ASP    67     -48.102  23.100 -14.442  1.00  1.00      1S   
ATOM    751 OD2  ASP    67     -50.169  22.722 -13.721  1.00  1.00      1S   
ATOM    752 C    ASP    67     -46.956  25.059 -10.937  1.00  1.00      1S   
ATOM    753 O    ASP    67     -46.751  26.232 -11.232  1.00  1.00      1S   
ATOM    754 N    LYS    68     -46.975  24.637  -9.648  1.00  1.00      1S   
ATOM    755 HN   LYS    68     -47.197  23.688  -9.428  1.00  0.00      1S   
ATOM    756 CA   LYS    68     -46.692  25.500  -8.517  1.00  1.00      1S   
ATOM    757 HA   LYS    68     -47.395  26.322  -8.552  1.00  0.00      1S   
ATOM    758 CB   LYS    68     -46.839  24.779  -7.156  1.00  1.00      1S   
ATOM    759 HB1  LYS    68     -46.549  25.478  -6.339  1.00  0.00      1S   
ATOM    760 HB2  LYS    68     -46.157  23.902  -7.118  1.00  0.00      1S   
ATOM    761 CG   LYS    68     -48.275  24.312  -6.881  1.00  1.00      1S   
ATOM    762 HG1  LYS    68     -48.544  23.510  -7.594  1.00  0.00      1S   
ATOM    763 HG2  LYS    68     -48.973  25.161  -7.056  1.00  0.00      1S   
ATOM    764 CD   LYS    68     -48.487  23.787  -5.455  1.00  1.00      1S   
ATOM    765 HD1  LYS    68     -48.338  24.635  -4.750  1.00  0.00      1S   
ATOM    766 HD2  LYS    68     -47.721  23.011  -5.230  1.00  0.00      1S   
ATOM    767 CE   LYS    68     -49.888  23.188  -5.271  1.00  1.00      1S   
ATOM    768 HE1  LYS    68     -49.977  22.233  -5.831  1.00  0.00      1S   
ATOM    769 HE2  LYS    68     -50.660  23.898  -5.635  1.00  0.00      1S   
ATOM    770 NZ   LYS    68     -50.172  22.912  -3.844  1.00  1.00      1S   
ATOM    771 HZ1  LYS    68     -50.125  23.801  -3.307  1.00  0.00      1S   
ATOM    772 HZ2  LYS    68     -49.469  22.243  -3.468  1.00  0.00      1S   
ATOM    773 HZ3  LYS    68     -51.124  22.504  -3.752  1.00  0.00      1S   
ATOM    774 C    LYS    68     -45.297  26.079  -8.587  1.00  1.00      1S   
ATOM    775 O    LYS    68     -45.105  27.265  -8.333  1.00  1.00      1S   
ATOM    776 N    TRP    69     -44.297  25.253  -8.971  1.00  1.00      1S   
ATOM    777 HN   TRP    69     -44.481  24.291  -9.165  1.00  0.00      1S   
ATOM    778 CA   TRP    69     -42.918  25.662  -9.131  1.00  1.00      1S   
ATOM    779 HA   TRP    69     -42.627  26.190  -8.233  1.00  0.00      1S   
ATOM    780 CB   TRP    69     -41.998  24.420  -9.295  1.00  1.00      1S   
ATOM    781 HB1  TRP    69     -42.467  23.734 -10.033  1.00  0.00      1S   
ATOM    782 HB2  TRP    69     -41.969  23.887  -8.320  1.00  0.00      1S   
ATOM    783 CG   TRP    69     -40.562  24.668  -9.739  1.00  1.00      1S   
ATOM    784 CD1  TRP    69     -39.980  24.278 -10.911  1.00  1.00      1S   
ATOM    785 HD1  TRP    69     -40.481  23.717 -11.687  1.00  0.00      1S   
ATOM    786 NE1  TRP    69     -38.680  24.721 -10.972  1.00  1.00      1S   
ATOM    787 HE1  TRP    69     -38.066  24.587 -11.721  1.00  0.00      1S   
ATOM    788 CE2  TRP    69     -38.402  25.431  -9.828  1.00  1.00      1S   
ATOM    789 CD2  TRP    69     -39.565  25.428  -9.026  1.00  1.00      1S   
ATOM    790 CE3  TRP    69     -39.594  26.089  -7.806  1.00  1.00      1S   
ATOM    791 HE3  TRP    69     -40.476  26.121  -7.192  1.00  0.00      1S   
ATOM    792 CZ3  TRP    69     -38.431  26.753  -7.392  1.00  1.00      1S   
ATOM    793 HZ3  TRP    69     -38.435  27.280  -6.455  1.00  0.00      1S   
ATOM    794 CZ2  TRP    69     -37.247  26.087  -9.411  1.00  1.00      1S   
ATOM    795 HZ2  TRP    69     -36.351  26.099 -10.013  1.00  0.00      1S   
ATOM    796 CH2  TRP    69     -37.275  26.756  -8.182  1.00  1.00      1S   
ATOM    797 HH2  TRP    69     -36.397  27.285  -7.840  1.00  0.00      1S   
ATOM    798 C    TRP    69     -42.754  26.625 -10.295  1.00  1.00      1S   
ATOM    799 O    TRP    69     -42.051  27.625 -10.172  1.00  1.00      1S   
ATOM    800 N    SER    70     -43.416  26.360 -11.446  1.00  1.00      1S   
ATOM    801 HN   SER    70     -43.956  25.525 -11.542  1.00  0.00      1S   
ATOM    802 CA   SER    70     -43.383  27.220 -12.616  1.00  1.00      1S   
ATOM    803 HA   SER    70     -42.346  27.395 -12.870  1.00  0.00      1S   
ATOM    804 CB   SER    70     -44.107  26.598 -13.835  1.00  1.00      1S   
ATOM    805 HB1  SER    70     -44.245  27.355 -14.636  1.00  0.00      1S   
ATOM    806 HB2  SER    70     -45.105  26.211 -13.536  1.00  0.00      1S   
ATOM    807 OG   SER    70     -43.343  25.532 -14.386  1.00  1.00      1S   
ATOM    808 HG1  SER    70     -43.648  24.726 -13.958  1.00  0.00      1S   
ATOM    809 C    SER    70     -44.017  28.565 -12.337  1.00  1.00      1S   
ATOM    810 O    SER    70     -43.501  29.596 -12.764  1.00  1.00      1S   
ATOM    811 N    ALA    71     -45.142  28.584 -11.585  1.00  1.00      1S   
ATOM    812 HN   ALA    71     -45.554  27.731 -11.264  1.00  0.00      1S   
ATOM    813 CA   ALA    71     -45.856  29.785 -11.208  1.00  1.00      1S   
ATOM    814 HA   ALA    71     -46.033  30.360 -12.106  1.00  0.00      1S   
ATOM    815 CB   ALA    71     -47.204  29.465 -10.538  1.00  1.00      1S   
ATOM    816 HB1  ALA    71     -47.060  28.843  -9.629  1.00  0.00      1S   
ATOM    817 HB2  ALA    71     -47.851  28.902 -11.244  1.00  0.00      1S   
ATOM    818 HB3  ALA    71     -47.735  30.399 -10.252  1.00  0.00      1S   
ATOM    819 C    ALA    71     -45.045  30.630 -10.261  1.00  1.00      1S   
ATOM    820 O    ALA    71     -44.982  31.848 -10.416  1.00  1.00      1S   
ATOM    821 N    PHE    72     -44.366  29.985  -9.281  1.00  1.00      1S   
ATOM    822 HN   PHE    72     -44.463  28.997  -9.166  1.00  0.00      1S   
ATOM    823 CA   PHE    72     -43.453  30.616  -8.353  1.00  1.00      1S   
ATOM    824 HA   PHE    72     -44.010  31.358  -7.798  1.00  0.00      1S   
ATOM    825 CB   PHE    72     -42.872  29.570  -7.361  1.00  1.00      1S   
ATOM    826 HB1  PHE    72     -42.495  28.689  -7.922  1.00  0.00      1S   
ATOM    827 HB2  PHE    72     -43.688  29.221  -6.693  1.00  0.00      1S   
ATOM    828 CG   PHE    72     -41.753  30.092  -6.492  1.00  1.00      1S   
ATOM    829 CD1  PHE    72     -41.984  31.052  -5.492  1.00  1.00      1S   
ATOM    830 HD1  PHE    72     -42.983  31.423  -5.323  1.00  0.00      1S   
ATOM    831 CE1  PHE    72     -40.921  31.538  -4.718  1.00  1.00      1S   
ATOM    832 HE1  PHE    72     -41.102  32.284  -3.958  1.00  0.00      1S   
ATOM    833 CZ   PHE    72     -39.618  31.076  -4.948  1.00  1.00      1S   
ATOM    834 HZ   PHE    72     -38.793  31.466  -4.370  1.00  0.00      1S   
ATOM    835 CD2  PHE    72     -40.443  29.638  -6.712  1.00  1.00      1S   
ATOM    836 HD2  PHE    72     -40.253  28.916  -7.492  1.00  0.00      1S   
ATOM    837 CE2  PHE    72     -39.381  30.131  -5.951  1.00  1.00      1S   
ATOM    838 HE2  PHE    72     -38.379  29.788  -6.150  1.00  0.00      1S   
ATOM    839 C    PHE    72     -42.348  31.327  -9.099  1.00  1.00      1S   
ATOM    840 O    PHE    72     -42.035  32.469  -8.785  1.00  1.00      1S   
ATOM    841 N    LEU    73     -41.753  30.681 -10.123  1.00  1.00      1S   
ATOM    842 HN   LEU    73     -42.036  29.761 -10.390  1.00  0.00      1S   
ATOM    843 CA   LEU    73     -40.652  31.244 -10.865  1.00  1.00      1S   
ATOM    844 HA   LEU    73     -39.933  31.607 -10.147  1.00  0.00      1S   
ATOM    845 CB   LEU    73     -39.996  30.217 -11.804  1.00  1.00      1S   
ATOM    846 HB1  LEU    73     -39.429  30.729 -12.615  1.00  0.00      1S   
ATOM    847 HB2  LEU    73     -40.793  29.608 -12.285  1.00  0.00      1S   
ATOM    848 CG   LEU    73     -39.001  29.287 -11.088  1.00  1.00      1S   
ATOM    849 HG   LEU    73     -39.521  28.793 -10.235  1.00  0.00      1S   
ATOM    850 CD1  LEU    73     -38.543  28.192 -12.062  1.00  1.00      1S   
ATOM    851 HD11 LEU    73     -38.057  28.649 -12.950  1.00  0.00      1S   
ATOM    852 HD12 LEU    73     -39.414  27.592 -12.400  1.00  0.00      1S   
ATOM    853 HD13 LEU    73     -37.813  27.517 -11.573  1.00  0.00      1S   
ATOM    854 CD2  LEU    73     -37.796  30.069 -10.527  1.00  1.00      1S   
ATOM    855 HD21 LEU    73     -38.107  30.739  -9.700  1.00  0.00      1S   
ATOM    856 HD22 LEU    73     -37.337  30.689 -11.327  1.00  0.00      1S   
ATOM    857 HD23 LEU    73     -37.028  29.372 -10.133  1.00  0.00      1S   
ATOM    858 C    LEU    73     -41.043  32.429 -11.693  1.00  1.00      1S   
ATOM    859 O    LEU    73     -40.284  33.388 -11.760  1.00  1.00      1S   
ATOM    860 N    LYS    74     -42.232  32.413 -12.331  1.00  1.00      1S   
ATOM    861 HN   LYS    74     -42.828  31.613 -12.297  1.00  0.00      1S   
ATOM    862 CA   LYS    74     -42.705  33.526 -13.123  1.00  1.00      1S   
ATOM    863 HA   LYS    74     -41.932  33.767 -13.841  1.00  0.00      1S   
ATOM    864 CB   LYS    74     -43.991  33.160 -13.882  1.00  1.00      1S   
ATOM    865 HB1  LYS    74     -44.836  33.018 -13.173  1.00  0.00      1S   
ATOM    866 HB2  LYS    74     -43.802  32.178 -14.369  1.00  0.00      1S   
ATOM    867 CG   LYS    74     -44.380  34.191 -14.955  1.00  1.00      1S   
ATOM    868 HG1  LYS    74     -43.484  34.438 -15.565  1.00  0.00      1S   
ATOM    869 HG2  LYS    74     -44.705  35.130 -14.455  1.00  0.00      1S   
ATOM    870 CD   LYS    74     -45.510  33.708 -15.880  1.00  1.00      1S   
ATOM    871 HD1  LYS    74     -45.773  34.534 -16.579  1.00  0.00      1S   
ATOM    872 HD2  LYS    74     -46.409  33.496 -15.258  1.00  0.00      1S   
ATOM    873 CE   LYS    74     -45.168  32.451 -16.696  1.00  1.00      1S   
ATOM    874 HE1  LYS    74     -45.997  32.204 -17.393  1.00  0.00      1S   
ATOM    875 HE2  LYS    74     -44.994  31.580 -16.030  1.00  0.00      1S   
ATOM    876 NZ   LYS    74     -43.940  32.655 -17.501  1.00  1.00      1S   
ATOM    877 HZ1  LYS    74     -43.155  32.910 -16.867  1.00  0.00      1S   
ATOM    878 HZ2  LYS    74     -44.097  33.426 -18.181  1.00  0.00      1S   
ATOM    879 HZ3  LYS    74     -43.704  31.781 -18.011  1.00  0.00      1S   
ATOM    880 C    LYS    74     -42.957  34.743 -12.269  1.00  1.00      1S   
ATOM    881 O    LYS    74     -42.576  35.853 -12.635  1.00  1.00      1S   
ATOM    882 N    GLU    75     -43.563  34.544 -11.076  1.00  1.00      1S   
ATOM    883 HN   GLU    75     -43.872  33.633 -10.805  1.00  0.00      1S   
ATOM    884 CA   GLU    75     -43.799  35.592 -10.109  1.00  1.00      1S   
ATOM    885 HA   GLU    75     -44.331  36.383 -10.618  1.00  0.00      1S   
ATOM    886 CB   GLU    75     -44.663  35.080  -8.927  1.00  1.00      1S   
ATOM    887 HB1  GLU    75     -44.236  34.117  -8.568  1.00  0.00      1S   
ATOM    888 HB2  GLU    75     -45.684  34.860  -9.312  1.00  0.00      1S   
ATOM    889 CG   GLU    75     -44.782  36.024  -7.706  1.00  1.00      1S   
ATOM    890 HG1  GLU    75     -43.776  36.194  -7.269  1.00  0.00      1S   
ATOM    891 HG2  GLU    75     -45.406  35.533  -6.929  1.00  0.00      1S   
ATOM    892 CD   GLU    75     -45.410  37.385  -8.030  1.00  1.00      1S   
ATOM    893 OE1  GLU    75     -45.946  37.575  -9.153  1.00  1.00      1S   
ATOM    894 OE2  GLU    75     -45.362  38.261  -7.124  1.00  1.00      1S   
ATOM    895 C    GLU    75     -42.500  36.174  -9.596  1.00  1.00      1S   
ATOM    896 O    GLU    75     -42.352  37.391  -9.510  1.00  1.00      1S   
ATOM    897 N    GLN    76     -41.507  35.316  -9.275  1.00  1.00      1S   
ATOM    898 HN   GLN    76     -41.633  34.327  -9.348  1.00  0.00      1S   
ATOM    899 CA   GLN    76     -40.226  35.750  -8.767  1.00  1.00      1S   
ATOM    900 HA   GLN    76     -40.405  36.492  -8.002  1.00  0.00      1S   
ATOM    901 CB   GLN    76     -39.425  34.591  -8.147  1.00  1.00      1S   
ATOM    902 HB1  GLN    76     -38.393  34.925  -7.904  1.00  0.00      1S   
ATOM    903 HB2  GLN    76     -39.347  33.766  -8.890  1.00  0.00      1S   
ATOM    904 CG   GLN    76     -40.058  34.034  -6.860  1.00  1.00      1S   
ATOM    905 HG1  GLN    76     -39.508  33.114  -6.578  1.00  0.00      1S   
ATOM    906 HG2  GLN    76     -41.116  33.758  -7.031  1.00  0.00      1S   
ATOM    907 CD   GLN    76     -39.957  35.034  -5.703  1.00  1.00      1S   
ATOM    908 OE1  GLN    76     -38.866  35.486  -5.344  1.00  1.00      1S   
ATOM    909 NE2  GLN    76     -41.133  35.369  -5.095  1.00  1.00      1S   
ATOM    910 HE21 GLN    76     -41.126  36.012  -4.333  1.00  0.00      1S   
ATOM    911 HE22 GLN    76     -41.990  34.964  -5.414  1.00  0.00      1S   
ATOM    912 C    GLN    76     -39.372  36.392  -9.834  1.00  1.00      1S   
ATOM    913 O    GLN    76     -38.528  37.223  -9.520  1.00  1.00      1S   
ATOM    914 N    SER    77     -39.582  36.046 -11.124  1.00  1.00      1S   
ATOM    915 HN   SER    77     -40.247  35.337 -11.356  1.00  0.00      1S   
ATOM    916 CA   SER    77     -38.874  36.624 -12.247  1.00  1.00      1S   
ATOM    917 HA   SER    77     -37.819  36.613 -12.009  1.00  0.00      1S   
ATOM    918 CB   SER    77     -39.108  35.832 -13.561  1.00  1.00      1S   
ATOM    919 HB1  SER    77     -40.183  35.850 -13.838  1.00  0.00      1S   
ATOM    920 HB2  SER    77     -38.809  34.774 -13.402  1.00  0.00      1S   
ATOM    921 OG   SER    77     -38.340  36.347 -14.645  1.00  1.00      1S   
ATOM    922 HG1  SER    77     -37.420  36.153 -14.428  1.00  0.00      1S   
ATOM    923 C    SER    77     -39.301  38.057 -12.429  1.00  1.00      1S   
ATOM    924 O    SER    77     -38.460  38.947 -12.539  1.00  1.00      1S   
ATOM    925 N    THR    78     -40.633  38.304 -12.413  1.00  1.00      1S   
ATOM    926 HN   THR    78     -41.283  37.546 -12.368  1.00  0.00      1S   
ATOM    927 CA   THR    78     -41.247  39.618 -12.458  1.00  1.00      1S   
ATOM    928 HA   THR    78     -40.960  40.078 -13.394  1.00  0.00      1S   
ATOM    929 CB   THR    78     -42.765  39.525 -12.377  1.00  1.00      1S   
ATOM    930 HB   THR    78     -43.068  39.032 -11.427  1.00  0.00      1S   
ATOM    931 OG1  THR    78     -43.255  38.732 -13.451  1.00  1.00      1S   
ATOM    932 HG1  THR    78     -44.144  38.469 -13.202  1.00  0.00      1S   
ATOM    933 CG2  THR    78     -43.417  40.921 -12.460  1.00  1.00      1S   
ATOM    934 HG21 THR    78     -43.118  41.433 -13.399  1.00  0.00      1S   
ATOM    935 HG22 THR    78     -43.119  41.555 -11.600  1.00  0.00      1S   
ATOM    936 HG23 THR    78     -44.524  40.829 -12.442  1.00  0.00      1S   
ATOM    937 C    THR    78     -40.741  40.488 -11.328  1.00  1.00      1S   
ATOM    938 O    THR    78     -40.309  41.617 -11.552  1.00  1.00      1S   
ATOM    939 N    LEU    79     -40.748  39.956 -10.083  1.00  1.00      1S   
ATOM    940 HN   LEU    79     -41.114  39.039  -9.925  1.00  0.00      1S   
ATOM    941 CA   LEU    79     -40.269  40.640  -8.900  1.00  1.00      1S   
ATOM    942 HA   LEU    79     -40.816  41.568  -8.822  1.00  0.00      1S   
ATOM    943 CB   LEU    79     -40.488  39.785  -7.630  1.00  1.00      1S   
ATOM    944 HB1  LEU    79     -39.719  40.011  -6.858  1.00  0.00      1S   
ATOM    945 HB2  LEU    79     -40.378  38.714  -7.904  1.00  0.00      1S   
ATOM    946 CG   LEU    79     -41.862  40.003  -6.964  1.00  1.00      1S   
ATOM    947 HG   LEU    79     -42.647  39.968  -7.755  1.00  0.00      1S   
ATOM    948 CD1  LEU    79     -42.164  38.873  -5.964  1.00  1.00      1S   
ATOM    949 HD11 LEU    79     -41.390  38.842  -5.169  1.00  0.00      1S   
ATOM    950 HD12 LEU    79     -42.179  37.893  -6.487  1.00  0.00      1S   
ATOM    951 HD13 LEU    79     -43.156  39.033  -5.491  1.00  0.00      1S   
ATOM    952 CD2  LEU    79     -41.929  41.381  -6.274  1.00  1.00      1S   
ATOM    953 HD21 LEU    79     -41.780  42.201  -7.006  1.00  0.00      1S   
ATOM    954 HD22 LEU    79     -41.137  41.455  -5.498  1.00  0.00      1S   
ATOM    955 HD23 LEU    79     -42.916  41.522  -5.787  1.00  0.00      1S   
ATOM    956 C    LEU    79     -38.803  40.995  -8.982  1.00  1.00      1S   
ATOM    957 O    LEU    79     -38.409  42.087  -8.579  1.00  1.00      1S   
ATOM    958 N    ALA    80     -37.964  40.087  -9.528  1.00  1.00      1S   
ATOM    959 HN   ALA    80     -38.303  39.202  -9.845  1.00  0.00      1S   
ATOM    960 CA   ALA    80     -36.536  40.273  -9.643  1.00  1.00      1S   
ATOM    961 HA   ALA    80     -36.165  40.539  -8.663  1.00  0.00      1S   
ATOM    962 CB   ALA    80     -35.834  38.983 -10.110  1.00  1.00      1S   
ATOM    963 HB1  ALA    80     -36.121  38.719 -11.149  1.00  0.00      1S   
ATOM    964 HB2  ALA    80     -36.123  38.139  -9.450  1.00  0.00      1S   
ATOM    965 HB3  ALA    80     -34.731  39.092 -10.061  1.00  0.00      1S   
ATOM    966 C    ALA    80     -36.172  41.380 -10.603  1.00  1.00      1S   
ATOM    967 O    ALA    80     -35.154  42.044 -10.424  1.00  1.00      1S   
ATOM    968 N    GLN    81     -37.018  41.628 -11.632  1.00  1.00      1S   
ATOM    969 HN   GLN    81     -37.846  41.081 -11.747  1.00  0.00      1S   
ATOM    970 CA   GLN    81     -36.806  42.643 -12.646  1.00  1.00      1S   
ATOM    971 HA   GLN    81     -35.791  42.558 -13.002  1.00  0.00      1S   
ATOM    972 CB   GLN    81     -37.758  42.438 -13.846  1.00  1.00      1S   
ATOM    973 HB1  GLN    81     -37.805  43.351 -14.482  1.00  0.00      1S   
ATOM    974 HB2  GLN    81     -38.779  42.244 -13.453  1.00  0.00      1S   
ATOM    975 CG   GLN    81     -37.300  41.274 -14.740  1.00  1.00      1S   
ATOM    976 HG1  GLN    81     -36.978  40.422 -14.103  1.00  0.00      1S   
ATOM    977 HG2  GLN    81     -36.437  41.592 -15.362  1.00  0.00      1S   
ATOM    978 CD   GLN    81     -38.444  40.817 -15.644  1.00  1.00      1S   
ATOM    979 OE1  GLN    81     -39.379  41.562 -15.955  1.00  1.00      1S   
ATOM    980 NE2  GLN    81     -38.358  39.525 -16.068  1.00  1.00      1S   
ATOM    981 HE21 GLN    81     -37.530  38.993 -15.881  1.00  0.00      1S   
ATOM    982 HE22 GLN    81     -39.095  39.135 -16.613  1.00  0.00      1S   
ATOM    983 C    GLN    81     -36.969  44.052 -12.130  1.00  1.00      1S   
ATOM    984 O    GLN    81     -36.602  45.002 -12.819  1.00  1.00      1S   
ATOM    985 N    MET    82     -37.488  44.227 -10.894  1.00  1.00      1S   
ATOM    986 HN   MET    82     -37.780  43.447 -10.342  1.00  0.00      1S   
ATOM    987 CA   MET    82     -37.671  45.525 -10.287  1.00  1.00      1S   
ATOM    988 HA   MET    82     -37.912  46.241 -11.061  1.00  0.00      1S   
ATOM    989 CB   MET    82     -38.831  45.505  -9.268  1.00  1.00      1S   
ATOM    990 HB1  MET    82     -38.907  46.492  -8.758  1.00  0.00      1S   
ATOM    991 HB2  MET    82     -38.618  44.735  -8.494  1.00  0.00      1S   
ATOM    992 CG   MET    82     -40.197  45.203  -9.911  1.00  1.00      1S   
ATOM    993 HG1  MET    82     -40.112  44.281 -10.526  1.00  0.00      1S   
ATOM    994 HG2  MET    82     -40.454  46.037 -10.601  1.00  0.00      1S   
ATOM    995 SD   MET    82     -41.514  44.981  -8.676  1.00  1.00      1S   
ATOM    996 CE   MET    82     -42.769  44.293  -9.794  1.00  1.00      1S   
ATOM    997 HE1  MET    82     -42.408  43.353 -10.265  1.00  0.00      1S   
ATOM    998 HE2  MET    82     -43.024  45.010 -10.604  1.00  0.00      1S   
ATOM    999 HE3  MET    82     -43.702  44.059  -9.238  1.00  0.00      1S   
ATOM   1000 C    MET    82     -36.418  46.008  -9.584  1.00  1.00      1S   
ATOM   1001 O    MET    82     -36.423  47.094  -9.007  1.00  1.00      1S   
ATOM   1002 N    TYR    83     -35.308  45.233  -9.628  1.00  1.00      1S   
ATOM   1003 HN   TYR    83     -35.314  44.343 -10.080  1.00  0.00      1S   
ATOM   1004 CA   TYR    83     -34.031  45.654  -9.090  1.00  1.00      1S   
ATOM   1005 HA   TYR    83     -34.131  46.605  -8.591  1.00  0.00      1S   
ATOM   1006 CB   TYR    83     -33.397  44.651  -8.090  1.00  1.00      1S   
ATOM   1007 HB1  TYR    83     -32.458  45.073  -7.671  1.00  0.00      1S   
ATOM   1008 HB2  TYR    83     -33.163  43.690  -8.593  1.00  0.00      1S   
ATOM   1009 CG   TYR    83     -34.330  44.335  -6.953  1.00  1.00      1S   
ATOM   1010 CD1  TYR    83     -35.312  43.338  -7.100  1.00  1.00      1S   
ATOM   1011 HD1  TYR    83     -35.402  42.813  -8.037  1.00  0.00      1S   
ATOM   1012 CE1  TYR    83     -36.184  43.023  -6.053  1.00  1.00      1S   
ATOM   1013 HE1  TYR    83     -36.935  42.259  -6.195  1.00  0.00      1S   
ATOM   1014 CZ   TYR    83     -36.081  43.704  -4.837  1.00  1.00      1S   
ATOM   1015 OH   TYR    83     -36.963  43.404  -3.777  1.00  1.00      1S   
ATOM   1016 HH   TYR    83     -37.584  42.743  -4.090  1.00  0.00      1S   
ATOM   1017 CD2  TYR    83     -34.230  45.006  -5.723  1.00  1.00      1S   
ATOM   1018 HD2  TYR    83     -33.476  45.767  -5.581  1.00  0.00      1S   
ATOM   1019 CE2  TYR    83     -35.108  44.696  -4.679  1.00  1.00      1S   
ATOM   1020 HE2  TYR    83     -35.051  45.239  -3.755  1.00  0.00      1S   
ATOM   1021 C    TYR    83     -33.103  45.757 -10.281  1.00  1.00      1S   
ATOM   1022 O    TYR    83     -32.811  44.719 -10.868  1.00  1.00      1S   
ATOM   1023 N    PRO    84     -32.615  46.909 -10.725  1.00  1.00      1S   
ATOM   1024 CD   PRO    84     -32.907  48.221 -10.154  1.00  1.00      1S   
ATOM   1025 HD1  PRO    84     -32.684  48.229  -9.067  1.00  0.00      1S   
ATOM   1026 HD2  PRO    84     -33.979  48.458 -10.327  1.00  0.00      1S   
ATOM   1027 CA   PRO    84     -31.786  46.999 -11.916  1.00  1.00      1S   
ATOM   1028 HA   PRO    84     -32.214  46.407 -12.714  1.00  0.00      1S   
ATOM   1029 CB   PRO    84     -31.775  48.497 -12.254  1.00  1.00      1S   
ATOM   1030 HB1  PRO    84     -32.639  48.720 -12.919  1.00  0.00      1S   
ATOM   1031 HB2  PRO    84     -30.844  48.833 -12.752  1.00  0.00      1S   
ATOM   1032 CG   PRO    84     -32.003  49.194 -10.909  1.00  1.00      1S   
ATOM   1033 HG1  PRO    84     -31.031  49.290 -10.376  1.00  0.00      1S   
ATOM   1034 HG2  PRO    84     -32.459  50.197 -11.023  1.00  0.00      1S   
ATOM   1035 C    PRO    84     -30.390  46.496 -11.627  1.00  1.00      1S   
ATOM   1036 O    PRO    84     -29.802  46.874 -10.614  1.00  1.00      1S   
ATOM   1037 N    LEU    85     -29.833  45.660 -12.538  1.00  1.00      1S   
ATOM   1038 HN   LEU    85     -30.356  45.343 -13.325  1.00  0.00      1S   
ATOM   1039 CA   LEU    85     -28.484  45.138 -12.450  1.00  1.00      1S   
ATOM   1040 HA   LEU    85     -28.373  44.652 -11.492  1.00  0.00      1S   
ATOM   1041 CB   LEU    85     -28.147  44.150 -13.587  1.00  1.00      1S   
ATOM   1042 HB1  LEU    85     -27.117  43.767 -13.431  1.00  0.00      1S   
ATOM   1043 HB2  LEU    85     -28.169  44.688 -14.561  1.00  0.00      1S   
ATOM   1044 CG   LEU    85     -29.067  42.921 -13.705  1.00  1.00      1S   
ATOM   1045 HG   LEU    85     -30.114  43.277 -13.841  1.00  0.00      1S   
ATOM   1046 CD1  LEU    85     -28.686  42.111 -14.956  1.00  1.00      1S   
ATOM   1047 HD11 LEU    85     -27.644  41.735 -14.868  1.00  0.00      1S   
ATOM   1048 HD12 LEU    85     -28.757  42.746 -15.864  1.00  0.00      1S   
ATOM   1049 HD13 LEU    85     -29.368  41.243 -15.076  1.00  0.00      1S   
ATOM   1050 CD2  LEU    85     -29.025  42.030 -12.455  1.00  1.00      1S   
ATOM   1051 HD21 LEU    85     -29.377  42.583 -11.559  1.00  0.00      1S   
ATOM   1052 HD22 LEU    85     -27.994  41.664 -12.268  1.00  0.00      1S   
ATOM   1053 HD23 LEU    85     -29.687  41.152 -12.608  1.00  0.00      1S   
ATOM   1054 C    LEU    85     -27.458  46.236 -12.554  1.00  1.00      1S   
ATOM   1055 O    LEU    85     -26.356  46.115 -12.028  1.00  1.00      1S   
ATOM   1056 N    GLN    86     -27.831  47.351 -13.227  1.00  1.00      1S   
ATOM   1057 HN   GLN    86     -28.737  47.390 -13.638  1.00  0.00      1S   
ATOM   1058 CA   GLN    86     -27.037  48.541 -13.428  1.00  1.00      1S   
ATOM   1059 HA   GLN    86     -26.180  48.251 -14.019  1.00  0.00      1S   
ATOM   1060 CB   GLN    86     -27.868  49.576 -14.233  1.00  1.00      1S   
ATOM   1061 HB1  GLN    86     -28.764  49.882 -13.652  1.00  0.00      1S   
ATOM   1062 HB2  GLN    86     -28.253  49.039 -15.131  1.00  0.00      1S   
ATOM   1063 CG   GLN    86     -27.083  50.794 -14.770  1.00  1.00      1S   
ATOM   1064 HG1  GLN    86     -27.466  51.047 -15.783  1.00  0.00      1S   
ATOM   1065 HG2  GLN    86     -26.008  50.533 -14.860  1.00  0.00      1S   
ATOM   1066 CD   GLN    86     -27.261  52.040 -13.892  1.00  1.00      1S   
ATOM   1067 OE1  GLN    86     -28.270  52.206 -13.201  1.00  1.00      1S   
ATOM   1068 NE2  GLN    86     -26.260  52.967 -13.959  1.00  1.00      1S   
ATOM   1069 HE21 GLN    86     -26.331  53.801 -13.416  1.00  0.00      1S   
ATOM   1070 HE22 GLN    86     -25.476  52.814 -14.560  1.00  0.00      1S   
ATOM   1071 C    GLN    86     -26.528  49.141 -12.129  1.00  1.00      1S   
ATOM   1072 O    GLN    86     -25.475  49.775 -12.113  1.00  1.00      1S   
ATOM   1073 N    GLU    87     -27.252  48.918 -11.004  1.00  1.00      1S   
ATOM   1074 HN   GLU    87     -28.092  48.379 -11.034  1.00  0.00      1S   
ATOM   1075 CA   GLU    87     -26.903  49.445  -9.703  1.00  1.00      1S   
ATOM   1076 HA   GLU    87     -26.057  50.111  -9.790  1.00  0.00      1S   
ATOM   1077 CB   GLU    87     -28.094  50.244  -9.121  1.00  1.00      1S   
ATOM   1078 HB1  GLU    87     -27.861  50.599  -8.093  1.00  0.00      1S   
ATOM   1079 HB2  GLU    87     -28.987  49.582  -9.071  1.00  0.00      1S   
ATOM   1080 CG   GLU    87     -28.418  51.470  -9.996  1.00  1.00      1S   
ATOM   1081 HG1  GLU    87     -28.612  51.137 -11.036  1.00  0.00      1S   
ATOM   1082 HG2  GLU    87     -27.553  52.167 -10.007  1.00  0.00      1S   
ATOM   1083 CD   GLU    87     -29.652  52.208  -9.489  1.00  1.00      1S   
ATOM   1084 OE1  GLU    87     -30.733  52.049 -10.117  1.00  1.00      1S   
ATOM   1085 OE2  GLU    87     -29.531  52.946  -8.476  1.00  1.00      1S   
ATOM   1086 C    GLU    87     -26.511  48.341  -8.741  1.00  1.00      1S   
ATOM   1087 O    GLU    87     -26.680  48.487  -7.531  1.00  1.00      1S   
ATOM   1088 N    ILE    88     -25.956  47.209  -9.246  1.00  1.00      1S   
ATOM   1089 HN   ILE    88     -25.833  47.087 -10.230  1.00  0.00      1S   
ATOM   1090 CA   ILE    88     -25.493  46.109  -8.417  1.00  1.00      1S   
ATOM   1091 HA   ILE    88     -25.542  46.386  -7.373  1.00  0.00      1S   
ATOM   1092 CB   ILE    88     -26.289  44.819  -8.619  1.00  1.00      1S   
ATOM   1093 HB   ILE    88     -26.171  44.496  -9.679  1.00  0.00      1S   
ATOM   1094 CG2  ILE    88     -25.715  43.693  -7.721  1.00  1.00      1S   
ATOM   1095 HG21 ILE    88     -25.767  43.983  -6.650  1.00  0.00      1S   
ATOM   1096 HG22 ILE    88     -24.656  43.478  -7.969  1.00  0.00      1S   
ATOM   1097 HG23 ILE    88     -26.278  42.749  -7.869  1.00  0.00      1S   
ATOM   1098 CG1  ILE    88     -27.809  45.075  -8.404  1.00  1.00      1S   
ATOM   1099 HG11 ILE    88     -28.335  44.895  -9.366  1.00  0.00      1S   
ATOM   1100 HG12 ILE    88     -27.984  46.138  -8.138  1.00  0.00      1S   
ATOM   1101 CD   ILE    88     -28.477  44.227  -7.322  1.00  1.00      1S   
ATOM   1102 HD1  ILE    88     -27.981  44.382  -6.345  1.00  0.00      1S   
ATOM   1103 HD2  ILE    88     -28.430  43.147  -7.572  1.00  0.00      1S   
ATOM   1104 HD3  ILE    88     -29.546  44.516  -7.223  1.00  0.00      1S   
ATOM   1105 C    ILE    88     -24.044  45.882  -8.774  1.00  1.00      1S   
ATOM   1106 O    ILE    88     -23.703  45.715  -9.944  1.00  1.00      1S   
ATOM   1107 N    GLN    89     -23.155  45.880  -7.750  1.00  1.00      1S   
ATOM   1108 HN   GLN    89     -23.463  45.990  -6.804  1.00  0.00      1S   
ATOM   1109 CA   GLN    89     -21.722  45.775  -7.922  1.00  1.00      1S   
ATOM   1110 HA   GLN    89     -21.469  45.935  -8.961  1.00  0.00      1S   
ATOM   1111 CB   GLN    89     -20.929  46.798  -7.074  1.00  1.00      1S   
ATOM   1112 HB1  GLN    89     -19.858  46.488  -7.036  1.00  0.00      1S   
ATOM   1113 HB2  GLN    89     -21.308  46.800  -6.030  1.00  0.00      1S   
ATOM   1114 CG   GLN    89     -20.930  48.227  -7.664  1.00  1.00      1S   
ATOM   1115 HG1  GLN    89     -20.591  48.178  -8.722  1.00  0.00      1S   
ATOM   1116 HG2  GLN    89     -20.213  48.862  -7.101  1.00  0.00      1S   
ATOM   1117 CD   GLN    89     -22.311  48.893  -7.629  1.00  1.00      1S   
ATOM   1118 OE1  GLN    89     -22.799  49.386  -8.651  1.00  1.00      1S   
ATOM   1119 NE2  GLN    89     -22.947  48.909  -6.420  1.00  1.00      1S   
ATOM   1120 HE21 GLN    89     -23.851  49.323  -6.348  1.00  0.00      1S   
ATOM   1121 HE22 GLN    89     -22.522  48.466  -5.630  1.00  0.00      1S   
ATOM   1122 C    GLN    89     -21.252  44.394  -7.561  1.00  1.00      1S   
ATOM   1123 O    GLN    89     -20.402  43.843  -8.260  1.00  1.00      1S   
ATOM   1124 N    ASN    90     -21.789  43.788  -6.469  1.00  1.00      1S   
ATOM   1125 HN   ASN    90     -22.462  44.258  -5.898  1.00  0.00      1S   
ATOM   1126 CA   ASN    90     -21.440  42.441  -6.047  1.00  1.00      1S   
ATOM   1127 HA   ASN    90     -20.364  42.404  -5.943  1.00  0.00      1S   
ATOM   1128 CB   ASN    90     -22.100  42.085  -4.681  1.00  1.00      1S   
ATOM   1129 HB1  ASN    90     -23.204  42.063  -4.788  1.00  0.00      1S   
ATOM   1130 HB2  ASN    90     -21.848  42.899  -3.967  1.00  0.00      1S   
ATOM   1131 CG   ASN    90     -21.629  40.744  -4.089  1.00  1.00      1S   
ATOM   1132 OD1  ASN    90     -21.455  39.745  -4.793  1.00  1.00      1S   
ATOM   1133 ND2  ASN    90     -21.445  40.718  -2.736  1.00  1.00      1S   
ATOM   1134 HD21 ASN    90     -21.153  39.870  -2.300  1.00  0.00      1S   
ATOM   1135 HD22 ASN    90     -21.594  41.547  -2.196  1.00  0.00      1S   
ATOM   1136 C    ASN    90     -21.867  41.476  -7.136  1.00  1.00      1S   
ATOM   1137 O    ASN    90     -23.038  41.416  -7.499  1.00  1.00      1S   
ATOM   1138 N    LEU    91     -20.885  40.740  -7.712  1.00  1.00      1S   
ATOM   1139 HN   LEU    91     -19.953  40.770  -7.361  1.00  0.00      1S   
ATOM   1140 CA   LEU    91     -21.054  40.010  -8.947  1.00  1.00      1S   
ATOM   1141 HA   LEU    91     -21.617  40.637  -9.621  1.00  0.00      1S   
ATOM   1142 CB   LEU    91     -19.710  39.641  -9.611  1.00  1.00      1S   
ATOM   1143 HB1  LEU    91     -19.860  38.839 -10.371  1.00  0.00      1S   
ATOM   1144 HB2  LEU    91     -19.028  39.239  -8.831  1.00  0.00      1S   
ATOM   1145 CG   LEU    91     -19.015  40.813 -10.338  1.00  1.00      1S   
ATOM   1146 HG   LEU    91     -18.961  41.680  -9.640  1.00  0.00      1S   
ATOM   1147 CD1  LEU    91     -17.577  40.412 -10.703  1.00  1.00      1S   
ATOM   1148 HD11 LEU    91     -17.593  39.519 -11.363  1.00  0.00      1S   
ATOM   1149 HD12 LEU    91     -17.001  40.162  -9.787  1.00  0.00      1S   
ATOM   1150 HD13 LEU    91     -17.062  41.240 -11.234  1.00  0.00      1S   
ATOM   1151 CD2  LEU    91     -19.786  41.263 -11.598  1.00  1.00      1S   
ATOM   1152 HD21 LEU    91     -20.795  41.640 -11.336  1.00  0.00      1S   
ATOM   1153 HD22 LEU    91     -19.896  40.412 -12.304  1.00  0.00      1S   
ATOM   1154 HD23 LEU    91     -19.233  42.076 -12.114  1.00  0.00      1S   
ATOM   1155 C    LEU    91     -21.836  38.742  -8.780  1.00  1.00      1S   
ATOM   1156 O    LEU    91     -22.578  38.376  -9.683  1.00  1.00      1S   
ATOM   1157 N    THR    92     -21.717  38.031  -7.636  1.00  1.00      1S   
ATOM   1158 HN   THR    92     -21.113  38.312  -6.894  1.00  0.00      1S   
ATOM   1159 CA   THR    92     -22.483  36.818  -7.404  1.00  1.00      1S   
ATOM   1160 HA   THR    92     -22.444  36.227  -8.309  1.00  0.00      1S   
ATOM   1161 CB   THR    92     -21.943  35.948  -6.281  1.00  1.00      1S   
ATOM   1162 HB   THR    92     -22.697  35.190  -5.968  1.00  0.00      1S   
ATOM   1163 OG1  THR    92     -21.575  36.730  -5.153  1.00  1.00      1S   
ATOM   1164 HG1  THR    92     -21.070  36.149  -4.580  1.00  0.00      1S   
ATOM   1165 CG2  THR    92     -20.700  35.199  -6.804  1.00  1.00      1S   
ATOM   1166 HG21 THR    92     -19.910  35.913  -7.118  1.00  0.00      1S   
ATOM   1167 HG22 THR    92     -20.971  34.566  -7.676  1.00  0.00      1S   
ATOM   1168 HG23 THR    92     -20.286  34.538  -6.013  1.00  0.00      1S   
ATOM   1169 C    THR    92     -23.938  37.152  -7.176  1.00  1.00      1S   
ATOM   1170 O    THR    92     -24.809  36.419  -7.636  1.00  1.00      1S   
ATOM   1171 N    VAL    93     -24.238  38.307  -6.530  1.00  1.00      1S   
ATOM   1172 HN   VAL    93     -23.513  38.866  -6.133  1.00  0.00      1S   
ATOM   1173 CA   VAL    93     -25.580  38.860  -6.429  1.00  1.00      1S   
ATOM   1174 HA   VAL    93     -26.220  38.103  -5.998  1.00  0.00      1S   
ATOM   1175 CB   VAL    93     -25.627  40.110  -5.549  1.00  1.00      1S   
ATOM   1176 HB   VAL    93     -24.898  40.860  -5.927  1.00  0.00      1S   
ATOM   1177 CG1  VAL    93     -27.028  40.765  -5.548  1.00  1.00      1S   
ATOM   1178 HG11 VAL    93     -27.796  40.039  -5.212  1.00  0.00      1S   
ATOM   1179 HG12 VAL    93     -27.305  41.135  -6.557  1.00  0.00      1S   
ATOM   1180 HG13 VAL    93     -27.040  41.634  -4.856  1.00  0.00      1S   
ATOM   1181 CG2  VAL    93     -25.214  39.714  -4.116  1.00  1.00      1S   
ATOM   1182 HG21 VAL    93     -24.185  39.302  -4.091  1.00  0.00      1S   
ATOM   1183 HG22 VAL    93     -25.913  38.952  -3.712  1.00  0.00      1S   
ATOM   1184 HG23 VAL    93     -25.247  40.607  -3.456  1.00  0.00      1S   
ATOM   1185 C    VAL    93     -26.105  39.180  -7.814  1.00  1.00      1S   
ATOM   1186 O    VAL    93     -27.254  38.880  -8.133  1.00  1.00      1S   
ATOM   1187 N    LYS    94     -25.242  39.759  -8.682  1.00  1.00      1S   
ATOM   1188 HN   LYS    94     -24.315  39.985  -8.391  1.00  0.00      1S   
ATOM   1189 CA   LYS    94     -25.561  40.137 -10.039  1.00  1.00      1S   
ATOM   1190 HA   LYS    94     -26.433  40.775  -9.987  1.00  0.00      1S   
ATOM   1191 CB   LYS    94     -24.400  40.929 -10.686  1.00  1.00      1S   
ATOM   1192 HB1  LYS    94     -23.757  40.263 -11.301  1.00  0.00      1S   
ATOM   1193 HB2  LYS    94     -23.756  41.341  -9.880  1.00  0.00      1S   
ATOM   1194 CG   LYS    94     -24.866  42.119 -11.532  1.00  1.00      1S   
ATOM   1195 HG1  LYS    94     -25.328  42.879 -10.865  1.00  0.00      1S   
ATOM   1196 HG2  LYS    94     -25.643  41.772 -12.248  1.00  0.00      1S   
ATOM   1197 CD   LYS    94     -23.714  42.759 -12.320  1.00  1.00      1S   
ATOM   1198 HD1  LYS    94     -23.241  41.955 -12.928  1.00  0.00      1S   
ATOM   1199 HD2  LYS    94     -22.950  43.153 -11.614  1.00  0.00      1S   
ATOM   1200 CE   LYS    94     -24.196  43.886 -13.239  1.00  1.00      1S   
ATOM   1201 HE1  LYS    94     -24.367  44.815 -12.658  1.00  0.00      1S   
ATOM   1202 HE2  LYS    94     -25.136  43.581 -13.743  1.00  0.00      1S   
ATOM   1203 NZ   LYS    94     -23.218  44.183 -14.308  1.00  1.00      1S   
ATOM   1204 HZ1  LYS    94     -23.074  43.328 -14.882  1.00  0.00      1S   
ATOM   1205 HZ2  LYS    94     -22.314  44.479 -13.888  1.00  0.00      1S   
ATOM   1206 HZ3  LYS    94     -23.590  44.944 -14.911  1.00  0.00      1S   
ATOM   1207 C    LYS    94     -25.895  38.937 -10.904  1.00  1.00      1S   
ATOM   1208 O    LYS    94     -26.838  38.985 -11.689  1.00  1.00      1S   
ATOM   1209 N    LEU    95     -25.139  37.819 -10.752  1.00  1.00      1S   
ATOM   1210 HN   LEU    95     -24.362  37.827 -10.123  1.00  0.00      1S   
ATOM   1211 CA   LEU    95     -25.334  36.571 -11.464  1.00  1.00      1S   
ATOM   1212 HA   LEU    95     -25.330  36.791 -12.521  1.00  0.00      1S   
ATOM   1213 CB   LEU    95     -24.259  35.501 -11.120  1.00  1.00      1S   
ATOM   1214 HB1  LEU    95     -24.633  34.491 -11.404  1.00  0.00      1S   
ATOM   1215 HB2  LEU    95     -24.096  35.494 -10.020  1.00  0.00      1S   
ATOM   1216 CG   LEU    95     -22.890  35.660 -11.823  1.00  1.00      1S   
ATOM   1217 HG   LEU    95     -22.420  36.608 -11.480  1.00  0.00      1S   
ATOM   1218 CD1  LEU    95     -21.958  34.501 -11.417  1.00  1.00      1S   
ATOM   1219 HD11 LEU    95     -22.401  33.529 -11.720  1.00  0.00      1S   
ATOM   1220 HD12 LEU    95     -21.805  34.491 -10.317  1.00  0.00      1S   
ATOM   1221 HD13 LEU    95     -20.968  34.605 -11.910  1.00  0.00      1S   
ATOM   1222 CD2  LEU    95     -23.026  35.732 -13.357  1.00  1.00      1S   
ATOM   1223 HD21 LEU    95     -23.509  36.682 -13.665  1.00  0.00      1S   
ATOM   1224 HD22 LEU    95     -23.637  34.882 -13.728  1.00  0.00      1S   
ATOM   1225 HD23 LEU    95     -22.025  35.683 -13.835  1.00  0.00      1S   
ATOM   1226 C    LEU    95     -26.673  35.957 -11.149  1.00  1.00      1S   
ATOM   1227 O    LEU    95     -27.379  35.510 -12.051  1.00  1.00      1S   
ATOM   1228 N    GLN    96     -27.053  35.931  -9.854  1.00  1.00      1S   
ATOM   1229 HN   GLN    96     -26.468  36.316  -9.142  1.00  0.00      1S   
ATOM   1230 CA   GLN    96     -28.281  35.330  -9.388  1.00  1.00      1S   
ATOM   1231 HA   GLN    96     -28.356  34.335  -9.807  1.00  0.00      1S   
ATOM   1232 CB   GLN    96     -28.306  35.245  -7.852  1.00  1.00      1S   
ATOM   1233 HB1  GLN    96     -29.315  34.944  -7.497  1.00  0.00      1S   
ATOM   1234 HB2  GLN    96     -28.090  36.257  -7.440  1.00  0.00      1S   
ATOM   1235 CG   GLN    96     -27.283  34.234  -7.315  1.00  1.00      1S   
ATOM   1236 HG1  GLN    96     -26.295  34.382  -7.799  1.00  0.00      1S   
ATOM   1237 HG2  GLN    96     -27.617  33.201  -7.537  1.00  0.00      1S   
ATOM   1238 CD   GLN    96     -27.160  34.407  -5.802  1.00  1.00      1S   
ATOM   1239 OE1  GLN    96     -27.976  33.892  -5.031  1.00  1.00      1S   
ATOM   1240 NE2  GLN    96     -26.112  35.171  -5.375  1.00  1.00      1S   
ATOM   1241 HE21 GLN    96     -25.508  35.593  -6.056  1.00  0.00      1S   
ATOM   1242 HE22 GLN    96     -25.973  35.328  -4.401  1.00  0.00      1S   
ATOM   1243 C    GLN    96     -29.478  36.118  -9.835  1.00  1.00      1S   
ATOM   1244 O    GLN    96     -30.437  35.549 -10.352  1.00  1.00      1S   
ATOM   1245 N    LEU    97     -29.434  37.464  -9.681  1.00  1.00      1S   
ATOM   1246 HN   LEU    97     -28.650  37.908  -9.250  1.00  0.00      1S   
ATOM   1247 CA   LEU    97     -30.490  38.348 -10.121  1.00  1.00      1S   
ATOM   1248 HA   LEU    97     -31.392  38.024  -9.627  1.00  0.00      1S   
ATOM   1249 CB   LEU    97     -30.191  39.845  -9.834  1.00  1.00      1S   
ATOM   1250 HB1  LEU    97     -30.404  40.453 -10.740  1.00  0.00      1S   
ATOM   1251 HB2  LEU    97     -29.105  39.964  -9.628  1.00  0.00      1S   
ATOM   1252 CG   LEU    97     -30.991  40.535  -8.703  1.00  1.00      1S   
ATOM   1253 HG   LEU    97     -30.528  40.264  -7.728  1.00  0.00      1S   
ATOM   1254 CD1  LEU    97     -30.866  42.057  -8.898  1.00  1.00      1S   
ATOM   1255 HD11 LEU    97     -31.422  42.370  -9.809  1.00  0.00      1S   
ATOM   1256 HD12 LEU    97     -29.803  42.344  -9.029  1.00  0.00      1S   
ATOM   1257 HD13 LEU    97     -31.283  42.599  -8.026  1.00  0.00      1S   
ATOM   1258 CD2  LEU    97     -32.481  40.149  -8.649  1.00  1.00      1S   
ATOM   1259 HD21 LEU    97     -32.609  39.104  -8.297  1.00  0.00      1S   
ATOM   1260 HD22 LEU    97     -32.934  40.250  -9.658  1.00  0.00      1S   
ATOM   1261 HD23 LEU    97     -33.028  40.816  -7.950  1.00  0.00      1S   
ATOM   1262 C    LEU    97     -30.726  38.205 -11.605  1.00  1.00      1S   
ATOM   1263 O    LEU    97     -31.868  38.095 -12.029  1.00  1.00      1S   
ATOM   1264 N    GLN    98     -29.648  38.166 -12.419  1.00  1.00      1S   
ATOM   1265 HN   GLN    98     -28.724  38.230 -12.047  1.00  0.00      1S   
ATOM   1266 CA   GLN    98     -29.728  38.085 -13.861  1.00  1.00      1S   
ATOM   1267 HA   GLN    98     -30.362  38.896 -14.192  1.00  0.00      1S   
ATOM   1268 CB   GLN    98     -28.336  38.258 -14.498  1.00  1.00      1S   
ATOM   1269 HB1  GLN    98     -27.683  37.408 -14.201  1.00  0.00      1S   
ATOM   1270 HB2  GLN    98     -27.891  39.187 -14.074  1.00  0.00      1S   
ATOM   1271 CG   GLN    98     -28.374  38.392 -16.032  1.00  1.00      1S   
ATOM   1272 HG1  GLN    98     -29.142  39.148 -16.310  1.00  0.00      1S   
ATOM   1273 HG2  GLN    98     -28.648  37.426 -16.504  1.00  0.00      1S   
ATOM   1274 CD   GLN    98     -27.025  38.863 -16.585  1.00  1.00      1S   
ATOM   1275 OE1  GLN    98     -26.981  39.700 -17.492  1.00  1.00      1S   
ATOM   1276 NE2  GLN    98     -25.907  38.314 -16.025  1.00  1.00      1S   
ATOM   1277 HE21 GLN    98     -25.008  38.588 -16.358  1.00  0.00      1S   
ATOM   1278 HE22 GLN    98     -25.998  37.658 -15.277  1.00  0.00      1S   
ATOM   1279 C    GLN    98     -30.334  36.785 -14.337  1.00  1.00      1S   
ATOM   1280 O    GLN    98     -31.137  36.775 -15.269  1.00  1.00      1S   
ATOM   1281 N    ALA    99     -29.992  35.655 -13.671  1.00  1.00      1S   
ATOM   1282 HN   ALA    99     -29.326  35.681 -12.927  1.00  0.00      1S   
ATOM   1283 CA   ALA    99     -30.542  34.347 -13.958  1.00  1.00      1S   
ATOM   1284 HA   ALA    99     -30.375  34.136 -15.006  1.00  0.00      1S   
ATOM   1285 CB   ALA    99     -29.888  33.246 -13.101  1.00  1.00      1S   
ATOM   1286 HB1  ALA    99     -30.034  33.448 -12.018  1.00  0.00      1S   
ATOM   1287 HB2  ALA    99     -28.798  33.205 -13.304  1.00  0.00      1S   
ATOM   1288 HB3  ALA    99     -30.324  32.251 -13.338  1.00  0.00      1S   
ATOM   1289 C    ALA    99     -32.026  34.296 -13.695  1.00  1.00      1S   
ATOM   1290 O    ALA    99     -32.769  33.631 -14.411  1.00  1.00      1S   
ATOM   1291 N    LEU   100     -32.501  35.014 -12.657  1.00  1.00      1S   
ATOM   1292 HN   LEU   100     -31.894  35.537 -12.062  1.00  0.00      1S   
ATOM   1293 CA   LEU   100     -33.899  35.030 -12.315  1.00  1.00      1S   
ATOM   1294 HA   LEU   100     -34.277  34.038 -12.505  1.00  0.00      1S   
ATOM   1295 CB   LEU   100     -34.089  35.387 -10.825  1.00  1.00      1S   
ATOM   1296 HB1  LEU   100     -33.938  36.477 -10.667  1.00  0.00      1S   
ATOM   1297 HB2  LEU   100     -33.285  34.865 -10.257  1.00  0.00      1S   
ATOM   1298 CG   LEU   100     -35.436  34.953 -10.203  1.00  1.00      1S   
ATOM   1299 HG   LEU   100     -36.240  35.608 -10.610  1.00  0.00      1S   
ATOM   1300 CD1  LEU   100     -35.811  33.493 -10.531  1.00  1.00      1S   
ATOM   1301 HD11 LEU   100     -34.962  32.817 -10.294  1.00  0.00      1S   
ATOM   1302 HD12 LEU   100     -36.066  33.384 -11.606  1.00  0.00      1S   
ATOM   1303 HD13 LEU   100     -36.694  33.177  -9.939  1.00  0.00      1S   
ATOM   1304 CD2  LEU   100     -35.383  35.158  -8.680  1.00  1.00      1S   
ATOM   1305 HD21 LEU   100     -35.168  36.218  -8.440  1.00  0.00      1S   
ATOM   1306 HD22 LEU   100     -34.584  34.525  -8.237  1.00  0.00      1S   
ATOM   1307 HD23 LEU   100     -36.348  34.876  -8.216  1.00  0.00      1S   
ATOM   1308 C    LEU   100     -34.665  35.994 -13.188  1.00  1.00      1S   
ATOM   1309 O    LEU   100     -35.846  35.792 -13.453  1.00  1.00      1S   
ATOM   1310 N    GLN   101     -33.995  37.060 -13.678  1.00  1.00      1S   
ATOM   1311 HN   GLN   101     -33.027  37.190 -13.473  1.00  0.00      1S   
ATOM   1312 CA   GLN   101     -34.607  38.119 -14.441  1.00  1.00      1S   
ATOM   1313 HA   GLN   101     -35.551  38.373 -13.978  1.00  0.00      1S   
ATOM   1314 CB   GLN   101     -33.728  39.380 -14.508  1.00  1.00      1S   
ATOM   1315 HB1  GLN   101     -34.033  40.037 -15.358  1.00  0.00      1S   
ATOM   1316 HB2  GLN   101     -32.672  39.072 -14.677  1.00  0.00      1S   
ATOM   1317 CG   GLN   101     -33.857  40.226 -13.242  1.00  1.00      1S   
ATOM   1318 HG1  GLN   101     -33.641  39.631 -12.333  1.00  0.00      1S   
ATOM   1319 HG2  GLN   101     -34.899  40.596 -13.165  1.00  0.00      1S   
ATOM   1320 CD   GLN   101     -32.893  41.403 -13.333  1.00  1.00      1S   
ATOM   1321 OE1  GLN   101     -32.072  41.507 -14.250  1.00  1.00      1S   
ATOM   1322 NE2  GLN   101     -33.011  42.323 -12.338  1.00  1.00      1S   
ATOM   1323 HE21 GLN   101     -33.714  42.206 -11.632  1.00  0.00      1S   
ATOM   1324 HE22 GLN   101     -32.431  43.135 -12.331  1.00  0.00      1S   
ATOM   1325 C    GLN   101     -34.889  37.753 -15.859  1.00  1.00      1S   
ATOM   1326 O    GLN   101     -35.729  38.413 -16.463  1.00  1.00      1S   
ATOM   1327 N    GLN   102     -34.214  36.728 -16.440  1.00  1.00      1S   
ATOM   1328 HN   GLN   102     -33.497  36.230 -15.958  1.00  0.00      1S   
ATOM   1329 CA   GLN   102     -34.488  36.315 -17.801  1.00  1.00      1S   
ATOM   1330 HA   GLN   102     -34.435  37.209 -18.410  1.00  0.00      1S   
ATOM   1331 CB   GLN   102     -33.453  35.336 -18.414  1.00  1.00      1S   
ATOM   1332 HB1  GLN   102     -32.478  35.870 -18.481  1.00  0.00      1S   
ATOM   1333 HB2  GLN   102     -33.777  35.097 -19.451  1.00  0.00      1S   
ATOM   1334 CG   GLN   102     -33.226  34.043 -17.606  1.00  1.00      1S   
ATOM   1335 HG1  GLN   102     -34.179  33.505 -17.434  1.00  0.00      1S   
ATOM   1336 HG2  GLN   102     -32.804  34.329 -16.624  1.00  0.00      1S   
ATOM   1337 CD   GLN   102     -32.257  33.051 -18.266  1.00  1.00      1S   
ATOM   1338 OE1  GLN   102     -31.725  32.169 -17.583  1.00  1.00      1S   
ATOM   1339 NE2  GLN   102     -32.043  33.178 -19.608  1.00  1.00      1S   
ATOM   1340 HE21 GLN   102     -31.428  32.543 -20.068  1.00  0.00      1S   
ATOM   1341 HE22 GLN   102     -32.505  33.903 -20.118  1.00  0.00      1S   
ATOM   1342 C    GLN   102     -35.902  35.776 -17.914  1.00  1.00      1S   
ATOM   1343 O    GLN   102     -36.232  34.641 -17.579  1.00  1.00      1S   
ATOM   1344 N    ASN   103     -36.788  36.670 -18.386  1.00  1.00      1S   
ATOM   1345 HN   ASN   103     -36.466  37.586 -18.623  1.00  0.00      1S   
ATOM   1346 CA   ASN   103     -38.205  36.515 -18.573  1.00  1.00      1S   
ATOM   1347 HA   ASN   103     -38.616  36.111 -17.658  1.00  0.00      1S   
ATOM   1348 CB   ASN   103     -38.941  37.855 -18.917  1.00  1.00      1S   
ATOM   1349 HB1  ASN   103     -39.381  38.237 -17.974  1.00  0.00      1S   
ATOM   1350 HB2  ASN   103     -39.787  37.668 -19.608  1.00  0.00      1S   
ATOM   1351 CG   ASN   103     -38.084  38.977 -19.539  1.00  1.00      1S   
ATOM   1352 OD1  ASN   103     -36.950  38.805 -19.987  1.00  1.00      1S   
ATOM   1353 ND2  ASN   103     -38.680  40.206 -19.572  1.00  1.00      1S   
ATOM   1354 HD21 ASN   103     -38.184  40.974 -19.969  1.00  0.00      1S   
ATOM   1355 HD22 ASN   103     -39.595  40.332 -19.189  1.00  0.00      1S   
ATOM   1356 C    ASN   103     -38.456  35.514 -19.657  1.00  1.00      1S   
ATOM   1357 O    ASN   103     -39.382  34.709 -19.567  1.00  1.00      1S   
ATOM   1358 N    GLY   104     -37.607  35.541 -20.707  1.00  1.00      1S   
ATOM   1359 HN   GLY   104     -36.874  36.216 -20.753  1.00  0.00      1S   
ATOM   1360 CA   GLY   104     -37.643  34.568 -21.764  1.00  1.00      1S   
ATOM   1361 HA1  GLY   104     -37.712  33.579 -21.330  1.00  0.00      1S   
ATOM   1362 HA2  GLY   104     -36.754  34.718 -22.358  1.00  0.00      1S   
ATOM   1363 C    GLY   104     -38.832  34.824 -22.629  1.00  1.00      1S   
ATOM   1364 O    GLY   104     -38.910  35.853 -23.291  1.00  1.00      1S   
ATOM   1365 N    SER   105     -39.803  33.883 -22.624  1.00  1.00      1S   
ATOM   1366 HN   SER   105     -39.725  33.075 -22.045  1.00  0.00      1S   
ATOM   1367 CA   SER   105     -40.958  33.926 -23.488  1.00  1.00      1S   
ATOM   1368 HA   SER   105     -40.596  34.152 -24.481  1.00  0.00      1S   
ATOM   1369 CB   SER   105     -41.715  32.576 -23.525  1.00  1.00      1S   
ATOM   1370 HB1  SER   105     -42.459  32.498 -22.703  1.00  0.00      1S   
ATOM   1371 HB2  SER   105     -40.983  31.749 -23.403  1.00  0.00      1S   
ATOM   1372 OG   SER   105     -42.363  32.388 -24.780  1.00  1.00      1S   
ATOM   1373 HG1  SER   105     -43.041  33.067 -24.842  1.00  0.00      1S   
ATOM   1374 C    SER   105     -41.925  35.012 -23.083  1.00  1.00      1S   
ATOM   1375 O    SER   105     -42.638  35.535 -23.933  1.00  1.00      1S   
ATOM   1376 N    SER   106     -41.956  35.397 -21.780  1.00  1.00      1S   
ATOM   1377 HN   SER   106     -41.349  34.979 -21.107  1.00  0.00      1S   
ATOM   1378 CA   SER   106     -42.891  36.374 -21.251  1.00  1.00      1S   
ATOM   1379 HA   SER   106     -43.856  36.135 -21.678  1.00  0.00      1S   
ATOM   1380 CB   SER   106     -43.064  36.262 -19.708  1.00  1.00      1S   
ATOM   1381 HB1  SER   106     -43.165  35.189 -19.437  1.00  0.00      1S   
ATOM   1382 HB2  SER   106     -43.988  36.788 -19.388  1.00  0.00      1S   
ATOM   1383 OG   SER   106     -41.969  36.791 -18.972  1.00  1.00      1S   
ATOM   1384 HG1  SER   106     -42.029  37.746 -19.066  1.00  0.00      1S   
ATOM   1385 C    SER   106     -42.575  37.810 -21.650  1.00  1.00      1S   
ATOM   1386 O    SER   106     -43.251  38.735 -21.201  1.00  1.00      1S   
ATOM   1387 N    VAL   107     -41.558  38.032 -22.521  1.00  1.00      1S   
ATOM   1388 HN   VAL   107     -40.979  37.282 -22.832  1.00  0.00      1S   
ATOM   1389 CA   VAL   107     -41.296  39.317 -23.136  1.00  1.00      1S   
ATOM   1390 HA   VAL   107     -41.574  40.086 -22.429  1.00  0.00      1S   
ATOM   1391 CB   VAL   107     -39.822  39.508 -23.480  1.00  1.00      1S   
ATOM   1392 HB   VAL   107     -39.217  39.113 -22.629  1.00  0.00      1S   
ATOM   1393 CG1  VAL   107     -39.422  38.732 -24.751  1.00  1.00      1S   
ATOM   1394 HG11 VAL   107     -39.968  39.098 -25.643  1.00  0.00      1S   
ATOM   1395 HG12 VAL   107     -39.628  37.650 -24.643  1.00  0.00      1S   
ATOM   1396 HG13 VAL   107     -38.342  38.879 -24.953  1.00  0.00      1S   
ATOM   1397 CG2  VAL   107     -39.507  41.014 -23.594  1.00  1.00      1S   
ATOM   1398 HG21 VAL   107     -39.765  41.539 -22.651  1.00  0.00      1S   
ATOM   1399 HG22 VAL   107     -40.083  41.475 -24.423  1.00  0.00      1S   
ATOM   1400 HG23 VAL   107     -38.424  41.162 -23.796  1.00  0.00      1S   
ATOM   1401 C    VAL   107     -42.170  39.474 -24.367  1.00  1.00      1S   
ATOM   1402 O    VAL   107     -42.456  40.588 -24.804  1.00  1.00      1S   
ATOM   1403 N    LEU   108     -42.644  38.342 -24.945  1.00  1.00      1S   
ATOM   1404 HN   LEU   108     -42.408  37.440 -24.587  1.00  0.00      1S   
ATOM   1405 CA   LEU   108     -43.599  38.338 -26.025  1.00  1.00      1S   
ATOM   1406 HA   LEU   108     -43.342  39.109 -26.736  1.00  0.00      1S   
ATOM   1407 CB   LEU   108     -43.719  36.958 -26.724  1.00  1.00      1S   
ATOM   1408 HB1  LEU   108     -44.571  36.978 -27.434  1.00  0.00      1S   
ATOM   1409 HB2  LEU   108     -43.949  36.186 -25.959  1.00  0.00      1S   
ATOM   1410 CG   LEU   108     -42.486  36.491 -27.524  1.00  1.00      1S   
ATOM   1411 HG   LEU   108     -41.592  36.530 -26.860  1.00  0.00      1S   
ATOM   1412 CD1  LEU   108     -42.666  35.026 -27.973  1.00  1.00      1S   
ATOM   1413 HD11 LEU   108     -43.624  34.904 -28.521  1.00  0.00      1S   
ATOM   1414 HD12 LEU   108     -42.673  34.351 -27.091  1.00  0.00      1S   
ATOM   1415 HD13 LEU   108     -41.840  34.720 -28.647  1.00  0.00      1S   
ATOM   1416 CD2  LEU   108     -42.226  37.403 -28.733  1.00  1.00      1S   
ATOM   1417 HD21 LEU   108     -41.889  38.409 -28.405  1.00  0.00      1S   
ATOM   1418 HD22 LEU   108     -43.148  37.514 -29.343  1.00  0.00      1S   
ATOM   1419 HD23 LEU   108     -41.441  36.960 -29.378  1.00  0.00      1S   
ATOM   1420 C    LEU   108     -44.954  38.634 -25.444  1.00  1.00      1S   
ATOM   1421 O    LEU   108     -45.187  38.452 -24.248  1.00  1.00      1S   
ATOM   1422 N    SER   109     -45.905  39.063 -26.312  1.00  1.00      1S   
ATOM   1423 HN   SER   109     -45.681  39.259 -27.263  1.00  0.00      1S   
ATOM   1424 CA   SER   109     -47.298  39.225 -25.953  1.00  1.00      1S   
ATOM   1425 HA   SER   109     -47.331  39.901 -25.109  1.00  0.00      1S   
ATOM   1426 CB   SER   109     -48.164  39.835 -27.099  1.00  1.00      1S   
ATOM   1427 HB1  SER   109     -47.588  40.646 -27.594  1.00  0.00      1S   
ATOM   1428 HB2  SER   109     -49.090  40.273 -26.673  1.00  0.00      1S   
ATOM   1429 OG   SER   109     -48.546  38.888 -28.092  1.00  1.00      1S   
ATOM   1430 HG1  SER   109     -49.068  39.362 -28.745  1.00  0.00      1S   
ATOM   1431 C    SER   109     -47.863  37.889 -25.528  1.00  1.00      1S   
ATOM   1432 O    SER   109     -47.293  36.841 -25.835  1.00  1.00      1S   
ATOM   1433 N    GLU   110     -49.011  37.889 -24.821  1.00  1.00      1S   
ATOM   1434 HN   GLU   110     -49.465  38.734 -24.549  1.00  0.00      1S   
ATOM   1435 CA   GLU   110     -49.613  36.668 -24.340  1.00  1.00      1S   
ATOM   1436 HA   GLU   110     -48.851  36.144 -23.778  1.00  0.00      1S   
ATOM   1437 CB   GLU   110     -50.818  36.907 -23.404  1.00  1.00      1S   
ATOM   1438 HB1  GLU   110     -50.866  36.039 -22.709  1.00  0.00      1S   
ATOM   1439 HB2  GLU   110     -51.774  36.937 -23.974  1.00  0.00      1S   
ATOM   1440 CG   GLU   110     -50.709  38.227 -22.612  1.00  1.00      1S   
ATOM   1441 HG1  GLU   110     -50.995  39.071 -23.277  1.00  0.00      1S   
ATOM   1442 HG2  GLU   110     -49.666  38.384 -22.264  1.00  0.00      1S   
ATOM   1443 CD   GLU   110     -51.622  38.245 -21.384  1.00  1.00      1S   
ATOM   1444 OE1  GLU   110     -52.248  37.199 -21.069  1.00  1.00      1S   
ATOM   1445 OE2  GLU   110     -51.689  39.324 -20.736  1.00  1.00      1S   
ATOM   1446 C    GLU   110     -50.040  35.791 -25.488  1.00  1.00      1S   
ATOM   1447 O    GLU   110     -49.853  34.582 -25.453  1.00  1.00      1S   
ATOM   1448 N    ASP   111     -50.568  36.406 -26.569  1.00  1.00      1S   
ATOM   1449 HN   ASP   111     -50.671  37.397 -26.591  1.00  0.00      1S   
ATOM   1450 CA   ASP   111     -51.001  35.716 -27.757  1.00  1.00      1S   
ATOM   1451 HA   ASP   111     -51.702  34.953 -27.448  1.00  0.00      1S   
ATOM   1452 CB   ASP   111     -51.718  36.705 -28.706  1.00  1.00      1S   
ATOM   1453 HB1  ASP   111     -51.017  37.511 -29.012  1.00  0.00      1S   
ATOM   1454 HB2  ASP   111     -52.571  37.174 -28.171  1.00  0.00      1S   
ATOM   1455 CG   ASP   111     -52.257  36.000 -29.945  1.00  1.00      1S   
ATOM   1456 OD1  ASP   111     -53.119  35.094 -29.809  1.00  1.00      1S   
ATOM   1457 OD2  ASP   111     -51.775  36.360 -31.049  1.00  1.00      1S   
ATOM   1458 C    ASP   111     -49.840  35.025 -28.449  1.00  1.00      1S   
ATOM   1459 O    ASP   111     -49.953  33.861 -28.820  1.00  1.00      1S   
ATOM   1460 N    LYS   112     -48.685  35.712 -28.606  1.00  1.00      1S   
ATOM   1461 HN   LYS   112     -48.592  36.656 -28.293  1.00  0.00      1S   
ATOM   1462 CA   LYS   112     -47.522  35.147 -29.254  1.00  1.00      1S   
ATOM   1463 HA   LYS   112     -47.846  34.704 -30.185  1.00  0.00      1S   
ATOM   1464 CB   LYS   112     -46.463  36.211 -29.586  1.00  1.00      1S   
ATOM   1465 HB1  LYS   112     -45.575  35.724 -30.044  1.00  0.00      1S   
ATOM   1466 HB2  LYS   112     -46.135  36.722 -28.657  1.00  0.00      1S   
ATOM   1467 CG   LYS   112     -47.000  37.263 -30.560  1.00  1.00      1S   
ATOM   1468 HG1  LYS   112     -47.494  38.067 -29.986  1.00  0.00      1S   
ATOM   1469 HG2  LYS   112     -47.767  36.807 -31.226  1.00  0.00      1S   
ATOM   1470 CD   LYS   112     -45.924  37.903 -31.432  1.00  1.00      1S   
ATOM   1471 HD1  LYS   112     -45.649  37.168 -32.221  1.00  0.00      1S   
ATOM   1472 HD2  LYS   112     -45.011  38.098 -30.825  1.00  0.00      1S   
ATOM   1473 CE   LYS   112     -46.394  39.228 -32.048  1.00  1.00      1S   
ATOM   1474 HE1  LYS   112     -46.006  40.083 -31.453  1.00  0.00      1S   
ATOM   1475 HE2  LYS   112     -47.503  39.277 -32.077  1.00  0.00      1S   
ATOM   1476 NZ   LYS   112     -45.905  39.373 -33.437  1.00  1.00      1S   
ATOM   1477 HZ1  LYS   112     -46.392  38.684 -34.045  1.00  0.00      1S   
ATOM   1478 HZ2  LYS   112     -44.877  39.178 -33.455  1.00  0.00      1S   
ATOM   1479 HZ3  LYS   112     -46.089  40.336 -33.781  1.00  0.00      1S   
ATOM   1480 C    LYS   112     -46.877  34.059 -28.433  1.00  1.00      1S   
ATOM   1481 O    LYS   112     -46.373  33.090 -28.993  1.00  1.00      1S   
ATOM   1482 N    SER   113     -46.910  34.173 -27.085  1.00  1.00      1S   
ATOM   1483 HN   SER   113     -47.295  34.987 -26.654  1.00  0.00      1S   
ATOM   1484 CA   SER   113     -46.403  33.160 -26.179  1.00  1.00      1S   
ATOM   1485 HA   SER   113     -45.387  32.931 -26.473  1.00  0.00      1S   
ATOM   1486 CB   SER   113     -46.420  33.601 -24.699  1.00  1.00      1S   
ATOM   1487 HB1  SER   113     -46.009  32.791 -24.057  1.00  0.00      1S   
ATOM   1488 HB2  SER   113     -47.454  33.832 -24.366  1.00  0.00      1S   
ATOM   1489 OG   SER   113     -45.613  34.755 -24.510  1.00  1.00      1S   
ATOM   1490 HG1  SER   113     -46.120  35.502 -24.844  1.00  0.00      1S   
ATOM   1491 C    SER   113     -47.215  31.893 -26.264  1.00  1.00      1S   
ATOM   1492 O    SER   113     -46.656  30.802 -26.315  1.00  1.00      1S   
ATOM   1493 N    LYS   114     -48.564  32.010 -26.304  1.00  1.00      1S   
ATOM   1494 HN   LYS   114     -49.008  32.903 -26.249  1.00  0.00      1S   
ATOM   1495 CA   LYS   114     -49.454  30.873 -26.398  1.00  1.00      1S   
ATOM   1496 HA   LYS   114     -49.163  30.161 -25.639  1.00  0.00      1S   
ATOM   1497 CB   LYS   114     -50.930  31.251 -26.172  1.00  1.00      1S   
ATOM   1498 HB1  LYS   114     -51.571  30.358 -26.355  1.00  0.00      1S   
ATOM   1499 HB2  LYS   114     -51.212  32.035 -26.908  1.00  0.00      1S   
ATOM   1500 CG   LYS   114     -51.228  31.736 -24.741  1.00  1.00      1S   
ATOM   1501 HG1  LYS   114     -50.667  32.662 -24.514  1.00  0.00      1S   
ATOM   1502 HG2  LYS   114     -50.871  30.962 -24.026  1.00  0.00      1S   
ATOM   1503 CD   LYS   114     -52.726  31.976 -24.491  1.00  1.00      1S   
ATOM   1504 HD1  LYS   114     -52.877  32.238 -23.419  1.00  0.00      1S   
ATOM   1505 HD2  LYS   114     -53.243  31.008 -24.678  1.00  0.00      1S   
ATOM   1506 CE   LYS   114     -53.342  33.084 -25.361  1.00  1.00      1S   
ATOM   1507 HE1  LYS   114     -52.930  33.077 -26.391  1.00  0.00      1S   
ATOM   1508 HE2  LYS   114     -53.158  34.082 -24.913  1.00  0.00      1S   
ATOM   1509 NZ   LYS   114     -54.806  32.895 -25.495  1.00  1.00      1S   
ATOM   1510 HZ1  LYS   114     -55.256  32.936 -24.559  1.00  0.00      1S   
ATOM   1511 HZ2  LYS   114     -54.986  31.965 -25.926  1.00  0.00      1S   
ATOM   1512 HZ3  LYS   114     -55.198  33.638 -26.108  1.00  0.00      1S   
ATOM   1513 C    LYS   114     -49.333  30.193 -27.741  1.00  1.00      1S   
ATOM   1514 O    LYS   114     -49.305  28.967 -27.798  1.00  1.00      1S   
ATOM   1515 N    ARG   115     -49.208  30.972 -28.846  1.00  1.00      1S   
ATOM   1516 HN   ARG   115     -49.284  31.966 -28.777  1.00  0.00      1S   
ATOM   1517 CA   ARG   115     -48.932  30.469 -30.181  1.00  1.00      1S   
ATOM   1518 HA   ARG   115     -49.724  29.786 -30.453  1.00  0.00      1S   
ATOM   1519 CB   ARG   115     -48.844  31.602 -31.235  1.00  1.00      1S   
ATOM   1520 HB1  ARG   115     -48.362  31.234 -32.169  1.00  0.00      1S   
ATOM   1521 HB2  ARG   115     -48.205  32.412 -30.820  1.00  0.00      1S   
ATOM   1522 CG   ARG   115     -50.211  32.193 -31.627  1.00  1.00      1S   
ATOM   1523 HG1  ARG   115     -50.824  32.296 -30.704  1.00  0.00      1S   
ATOM   1524 HG2  ARG   115     -50.746  31.484 -32.293  1.00  0.00      1S   
ATOM   1525 CD   ARG   115     -50.098  33.596 -32.256  1.00  1.00      1S   
ATOM   1526 HD1  ARG   115     -49.053  33.968 -32.195  1.00  0.00      1S   
ATOM   1527 HD2  ARG   115     -50.751  34.286 -31.686  1.00  0.00      1S   
ATOM   1528 NE   ARG   115     -50.492  33.568 -33.710  1.00  1.00      1S   
ATOM   1529 HE   ARG   115     -50.042  32.908 -34.305  1.00  0.00      1S   
ATOM   1530 CZ   ARG   115     -51.390  34.429 -34.277  1.00  1.00      1S   
ATOM   1531 NH1  ARG   115     -51.637  34.356 -35.611  1.00  1.00      1S   
ATOM   1532 HH11 ARG   115     -51.159  33.681 -36.172  1.00  0.00      1S   
ATOM   1533 HH12 ARG   115     -52.290  34.987 -36.026  1.00  0.00      1S   
ATOM   1534 NH2  ARG   115     -52.056  35.371 -33.560  1.00  1.00      1S   
ATOM   1535 HH21 ARG   115     -51.872  35.487 -32.571  1.00  0.00      1S   
ATOM   1536 HH22 ARG   115     -52.700  35.980 -34.001  1.00  0.00      1S   
ATOM   1537 C    ARG   115     -47.628  29.706 -30.214  1.00  1.00      1S   
ATOM   1538 O    ARG   115     -47.568  28.620 -30.780  1.00  1.00      1S   
ATOM   1539 N    LEU   116     -46.562  30.239 -29.571  1.00  1.00      1S   
ATOM   1540 HN   LEU   116     -46.629  31.126 -29.116  1.00  0.00      1S   
ATOM   1541 CA   LEU   116     -45.257  29.619 -29.526  1.00  1.00      1S   
ATOM   1542 HA   LEU   116     -44.983  29.406 -30.549  1.00  0.00      1S   
ATOM   1543 CB   LEU   116     -44.190  30.544 -28.897  1.00  1.00      1S   
ATOM   1544 HB1  LEU   116     -44.475  30.783 -27.849  1.00  0.00      1S   
ATOM   1545 HB2  LEU   116     -44.193  31.501 -29.464  1.00  0.00      1S   
ATOM   1546 CG   LEU   116     -42.743  29.991 -28.904  1.00  1.00      1S   
ATOM   1547 HG   LEU   116     -42.706  29.106 -28.227  1.00  0.00      1S   
ATOM   1548 CD1  LEU   116     -42.293  29.520 -30.302  1.00  1.00      1S   
ATOM   1549 HD11 LEU   116     -42.457  30.323 -31.049  1.00  0.00      1S   
ATOM   1550 HD12 LEU   116     -42.863  28.621 -30.620  1.00  0.00      1S   
ATOM   1551 HD13 LEU   116     -41.216  29.256 -30.296  1.00  0.00      1S   
ATOM   1552 CD2  LEU   116     -41.772  31.039 -28.332  1.00  1.00      1S   
ATOM   1553 HD21 LEU   116     -42.073  31.318 -27.300  1.00  0.00      1S   
ATOM   1554 HD22 LEU   116     -41.775  31.953 -28.963  1.00  0.00      1S   
ATOM   1555 HD23 LEU   116     -40.741  30.637 -28.299  1.00  0.00      1S   
ATOM   1556 C    LEU   116     -45.285  28.315 -28.773  1.00  1.00      1S   
ATOM   1557 O    LEU   116     -44.767  27.316 -29.257  1.00  1.00      1S   
ATOM   1558 N    ASN   117     -45.926  28.272 -27.584  1.00  1.00      1S   
ATOM   1559 HN   ASN   117     -46.339  29.094 -27.192  1.00  0.00      1S   
ATOM   1560 CA   ASN   117     -46.023  27.072 -26.778  1.00  1.00      1S   
ATOM   1561 HA   ASN   117     -45.028  26.659 -26.680  1.00  0.00      1S   
ATOM   1562 CB   ASN   117     -46.607  27.352 -25.371  1.00  1.00      1S   
ATOM   1563 HB1  ASN   117     -46.814  26.397 -24.841  1.00  0.00      1S   
ATOM   1564 HB2  ASN   117     -47.553  27.926 -25.464  1.00  0.00      1S   
ATOM   1565 CG   ASN   117     -45.592  28.144 -24.534  1.00  1.00      1S   
ATOM   1566 OD1  ASN   117     -44.399  28.209 -24.849  1.00  1.00      1S   
ATOM   1567 ND2  ASN   117     -46.089  28.749 -23.415  1.00  1.00      1S   
ATOM   1568 HD21 ASN   117     -45.472  29.262 -22.824  1.00  0.00      1S   
ATOM   1569 HD22 ASN   117     -47.060  28.665 -23.190  1.00  0.00      1S   
ATOM   1570 C    ASN   117     -46.858  26.014 -27.464  1.00  1.00      1S   
ATOM   1571 O    ASN   117     -46.570  24.830 -27.331  1.00  1.00      1S   
ATOM   1572 N    THR   118     -47.875  26.416 -28.261  1.00  1.00      1S   
ATOM   1573 HN   THR   118     -48.100  27.386 -28.338  1.00  0.00      1S   
ATOM   1574 CA   THR   118     -48.686  25.521 -29.067  1.00  1.00      1S   
ATOM   1575 HA   THR   118     -49.032  24.723 -28.423  1.00  0.00      1S   
ATOM   1576 CB   THR   118     -49.895  26.228 -29.664  1.00  1.00      1S   
ATOM   1577 HB   THR   118     -49.578  27.138 -30.219  1.00  0.00      1S   
ATOM   1578 OG1  THR   118     -50.768  26.636 -28.618  1.00  1.00      1S   
ATOM   1579 HG1  THR   118     -50.347  27.395 -28.200  1.00  0.00      1S   
ATOM   1580 CG2  THR   118     -50.679  25.308 -30.624  1.00  1.00      1S   
ATOM   1581 HG21 THR   118     -50.906  24.338 -30.135  1.00  0.00      1S   
ATOM   1582 HG22 THR   118     -50.098  25.116 -31.550  1.00  0.00      1S   
ATOM   1583 HG23 THR   118     -51.635  25.789 -30.921  1.00  0.00      1S   
ATOM   1584 C    THR   118     -47.854  24.890 -30.163  1.00  1.00      1S   
ATOM   1585 O    THR   118     -47.922  23.680 -30.370  1.00  1.00      1S   
ATOM   1586 N    ILE   119     -47.018  25.691 -30.868  1.00  1.00      1S   
ATOM   1587 HN   ILE   119     -47.005  26.676 -30.699  1.00  0.00      1S   
ATOM   1588 CA   ILE   119     -46.095  25.238 -31.895  1.00  1.00      1S   
ATOM   1589 HA   ILE   119     -46.670  24.720 -32.650  1.00  0.00      1S   
ATOM   1590 CB   ILE   119     -45.371  26.411 -32.545  1.00  1.00      1S   
ATOM   1591 HB   ILE   119     -45.037  27.109 -31.743  1.00  0.00      1S   
ATOM   1592 CG2  ILE   119     -44.114  25.969 -33.332  1.00  1.00      1S   
ATOM   1593 HG21 ILE   119     -44.354  25.131 -34.018  1.00  0.00      1S   
ATOM   1594 HG22 ILE   119     -43.308  25.651 -32.638  1.00  0.00      1S   
ATOM   1595 HG23 ILE   119     -43.719  26.812 -33.934  1.00  0.00      1S   
ATOM   1596 CG1  ILE   119     -46.359  27.180 -33.447  1.00  1.00      1S   
ATOM   1597 HG11 ILE   119     -47.338  27.280 -32.929  1.00  0.00      1S   
ATOM   1598 HG12 ILE   119     -46.535  26.606 -34.383  1.00  0.00      1S   
ATOM   1599 CD   ILE   119     -45.859  28.582 -33.781  1.00  1.00      1S   
ATOM   1600 HD1  ILE   119     -44.981  28.541 -34.459  1.00  0.00      1S   
ATOM   1601 HD2  ILE   119     -45.566  29.118 -32.854  1.00  0.00      1S   
ATOM   1602 HD3  ILE   119     -46.665  29.162 -34.275  1.00  0.00      1S   
ATOM   1603 C    ILE   119     -45.101  24.256 -31.327  1.00  1.00      1S   
ATOM   1604 O    ILE   119     -44.891  23.192 -31.904  1.00  1.00      1S   
ATOM   1605 N    LEU   120     -44.493  24.578 -30.161  1.00  1.00      1S   
ATOM   1606 HN   LEU   120     -44.681  25.453 -29.717  1.00  0.00      1S   
ATOM   1607 CA   LEU   120     -43.531  23.735 -29.484  1.00  1.00      1S   
ATOM   1608 HA   LEU   120     -42.720  23.547 -30.172  1.00  0.00      1S   
ATOM   1609 CB   LEU   120     -42.996  24.385 -28.186  1.00  1.00      1S   
ATOM   1610 HB1  LEU   120     -42.411  23.638 -27.604  1.00  0.00      1S   
ATOM   1611 HB2  LEU   120     -43.858  24.700 -27.559  1.00  0.00      1S   
ATOM   1612 CG   LEU   120     -42.079  25.605 -28.421  1.00  1.00      1S   
ATOM   1613 HG   LEU   120     -42.621  26.343 -29.051  1.00  0.00      1S   
ATOM   1614 CD1  LEU   120     -41.748  26.303 -27.089  1.00  1.00      1S   
ATOM   1615 HD11 LEU   120     -41.202  25.608 -26.416  1.00  0.00      1S   
ATOM   1616 HD12 LEU   120     -42.681  26.629 -26.582  1.00  0.00      1S   
ATOM   1617 HD13 LEU   120     -41.115  27.197 -27.269  1.00  0.00      1S   
ATOM   1618 CD2  LEU   120     -40.797  25.223 -29.180  1.00  1.00      1S   
ATOM   1619 HD21 LEU   120     -41.030  24.923 -30.223  1.00  0.00      1S   
ATOM   1620 HD22 LEU   120     -40.289  24.377 -28.671  1.00  0.00      1S   
ATOM   1621 HD23 LEU   120     -40.102  26.087 -29.214  1.00  0.00      1S   
ATOM   1622 C    LEU   120     -44.126  22.402 -29.119  1.00  1.00      1S   
ATOM   1623 O    LEU   120     -43.510  21.365 -29.357  1.00  1.00      1S   
ATOM   1624 N    ASN   121     -45.367  22.408 -28.576  1.00  1.00      1S   
ATOM   1625 HN   ASN   121     -45.838  23.270 -28.398  1.00  0.00      1S   
ATOM   1626 CA   ASN   121     -46.107  21.215 -28.233  1.00  1.00      1S   
ATOM   1627 HA   ASN   121     -45.487  20.626 -27.569  1.00  0.00      1S   
ATOM   1628 CB   ASN   121     -47.475  21.523 -27.569  1.00  1.00      1S   
ATOM   1629 HB1  ASN   121     -48.226  20.736 -27.803  1.00  0.00      1S   
ATOM   1630 HB2  ASN   121     -47.871  22.494 -27.929  1.00  0.00      1S   
ATOM   1631 CG   ASN   121     -47.313  21.531 -26.047  1.00  1.00      1S   
ATOM   1632 OD1  ASN   121     -47.566  20.513 -25.395  1.00  1.00      1S   
ATOM   1633 ND2  ASN   121     -46.875  22.688 -25.474  1.00  1.00      1S   
ATOM   1634 HD21 ASN   121     -46.687  23.487 -26.052  1.00  0.00      1S   
ATOM   1635 HD22 ASN   121     -46.748  22.731 -24.486  1.00  0.00      1S   
ATOM   1636 C    ASN   121     -46.350  20.367 -29.448  1.00  1.00      1S   
ATOM   1637 O    ASN   121     -46.057  19.179 -29.417  1.00  1.00      1S   
ATOM   1638 N    THR   122     -46.850  20.958 -30.556  1.00  1.00      1S   
ATOM   1639 HN   THR   122     -47.029  21.941 -30.570  1.00  0.00      1S   
ATOM   1640 CA   THR   122     -47.208  20.236 -31.760  1.00  1.00      1S   
ATOM   1641 HA   THR   122     -47.898  19.456 -31.463  1.00  0.00      1S   
ATOM   1642 CB   THR   122     -47.902  21.110 -32.791  1.00  1.00      1S   
ATOM   1643 HB   THR   122     -47.249  21.957 -33.094  1.00  0.00      1S   
ATOM   1644 OG1  THR   122     -49.097  21.646 -32.234  1.00  1.00      1S   
ATOM   1645 HG1  THR   122     -48.824  22.314 -31.597  1.00  0.00      1S   
ATOM   1646 CG2  THR   122     -48.279  20.280 -34.035  1.00  1.00      1S   
ATOM   1647 HG21 THR   122     -48.836  19.365 -33.743  1.00  0.00      1S   
ATOM   1648 HG22 THR   122     -47.366  19.973 -34.584  1.00  0.00      1S   
ATOM   1649 HG23 THR   122     -48.908  20.877 -34.728  1.00  0.00      1S   
ATOM   1650 C    THR   122     -46.007  19.553 -32.363  1.00  1.00      1S   
ATOM   1651 O    THR   122     -46.063  18.358 -32.627  1.00  1.00      1S   
ATOM   1652 N    MET   123     -44.868  20.264 -32.541  1.00  1.00      1S   
ATOM   1653 HN   MET   123     -44.823  21.236 -32.312  1.00  0.00      1S   
ATOM   1654 CA   MET   123     -43.647  19.684 -33.068  1.00  1.00      1S   
ATOM   1655 HA   MET   123     -43.879  19.293 -34.048  1.00  0.00      1S   
ATOM   1656 CB   MET   123     -42.507  20.715 -33.197  1.00  1.00      1S   
ATOM   1657 HB1  MET   123     -41.571  20.191 -33.495  1.00  0.00      1S   
ATOM   1658 HB2  MET   123     -42.332  21.196 -32.210  1.00  0.00      1S   
ATOM   1659 CG   MET   123     -42.791  21.793 -34.254  1.00  1.00      1S   
ATOM   1660 HG1  MET   123     -43.580  22.477 -33.877  1.00  0.00      1S   
ATOM   1661 HG2  MET   123     -43.206  21.284 -35.152  1.00  0.00      1S   
ATOM   1662 SD   MET   123     -41.331  22.748 -34.760  1.00  1.00      1S   
ATOM   1663 CE   MET   123     -40.882  23.443 -33.143  1.00  1.00      1S   
ATOM   1664 HE1  MET   123     -40.550  22.653 -32.438  1.00  0.00      1S   
ATOM   1665 HE2  MET   123     -41.743  23.973 -32.683  1.00  0.00      1S   
ATOM   1666 HE3  MET   123     -40.046  24.167 -33.248  1.00  0.00      1S   
ATOM   1667 C    MET   123     -43.123  18.541 -32.230  1.00  1.00      1S   
ATOM   1668 O    MET   123     -42.607  17.562 -32.767  1.00  1.00      1S   
ATOM   1669 N    SER   124     -43.278  18.630 -30.890  1.00  1.00      1S   
ATOM   1670 HN   SER   124     -43.702  19.435 -30.477  1.00  0.00      1S   
ATOM   1671 CA   SER   124     -42.866  17.598 -29.966  1.00  1.00      1S   
ATOM   1672 HA   SER   124     -41.842  17.345 -30.204  1.00  0.00      1S   
ATOM   1673 CB   SER   124     -42.925  18.083 -28.495  1.00  1.00      1S   
ATOM   1674 HB1  SER   124     -43.971  18.318 -28.208  1.00  0.00      1S   
ATOM   1675 HB2  SER   124     -42.322  19.011 -28.394  1.00  0.00      1S   
ATOM   1676 OG   SER   124     -42.405  17.112 -27.591  1.00  1.00      1S   
ATOM   1677 HG1  SER   124     -41.449  17.114 -27.709  1.00  0.00      1S   
ATOM   1678 C    SER   124     -43.711  16.352 -30.129  1.00  1.00      1S   
ATOM   1679 O    SER   124     -43.170  15.247 -30.167  1.00  1.00      1S   
ATOM   1680 N    THR   125     -45.058  16.490 -30.247  1.00  1.00      1S   
ATOM   1681 HN   THR   125     -45.501  17.386 -30.226  1.00  0.00      1S   
ATOM   1682 CA   THR   125     -45.936  15.339 -30.354  1.00  1.00      1S   
ATOM   1683 HA   THR   125     -45.562  14.623 -29.638  1.00  0.00      1S   
ATOM   1684 CB   THR   125     -47.407  15.535 -29.952  1.00  1.00      1S   
ATOM   1685 HB   THR   125     -47.787  14.548 -29.597  1.00  0.00      1S   
ATOM   1686 OG1  THR   125     -48.257  15.966 -31.012  1.00  1.00      1S   
ATOM   1687 HG1  THR   125     -49.152  15.902 -30.672  1.00  0.00      1S   
ATOM   1688 CG2  THR   125     -47.535  16.545 -28.798  1.00  1.00      1S   
ATOM   1689 HG21 THR   125     -47.660  17.567 -29.206  1.00  0.00      1S   
ATOM   1690 HG22 THR   125     -46.650  16.525 -28.129  1.00  0.00      1S   
ATOM   1691 HG23 THR   125     -48.440  16.328 -28.193  1.00  0.00      1S   
ATOM   1692 C    THR   125     -45.810  14.697 -31.716  1.00  1.00      1S   
ATOM   1693 O    THR   125     -45.895  13.481 -31.825  1.00  1.00      1S   
ATOM   1694 N    ILE   126     -45.565  15.491 -32.788  1.00  1.00      1S   
ATOM   1695 HN   ILE   126     -45.527  16.484 -32.684  1.00  0.00      1S   
ATOM   1696 CA   ILE   126     -45.349  14.995 -34.136  1.00  1.00      1S   
ATOM   1697 HA   ILE   126     -46.197  14.377 -34.398  1.00  0.00      1S   
ATOM   1698 CB   ILE   126     -45.232  16.122 -35.166  1.00  1.00      1S   
ATOM   1699 HB   ILE   126     -44.524  16.888 -34.777  1.00  0.00      1S   
ATOM   1700 CG2  ILE   126     -44.677  15.595 -36.509  1.00  1.00      1S   
ATOM   1701 HG21 ILE   126     -45.283  14.735 -36.866  1.00  0.00      1S   
ATOM   1702 HG22 ILE   126     -43.621  15.279 -36.391  1.00  0.00      1S   
ATOM   1703 HG23 ILE   126     -44.679  16.377 -37.292  1.00  0.00      1S   
ATOM   1704 CG1  ILE   126     -46.605  16.800 -35.380  1.00  1.00      1S   
ATOM   1705 HG11 ILE   126     -46.990  17.178 -34.412  1.00  0.00      1S   
ATOM   1706 HG12 ILE   126     -47.334  16.043 -35.745  1.00  0.00      1S   
ATOM   1707 CD   ILE   126     -46.552  17.962 -36.375  1.00  1.00      1S   
ATOM   1708 HD1  ILE   126     -46.407  17.585 -37.407  1.00  0.00      1S   
ATOM   1709 HD2  ILE   126     -45.711  18.645 -36.128  1.00  0.00      1S   
ATOM   1710 HD3  ILE   126     -47.500  18.538 -36.356  1.00  0.00      1S   
ATOM   1711 C    ILE   126     -44.120  14.112 -34.165  1.00  1.00      1S   
ATOM   1712 O    ILE   126     -44.125  13.057 -34.793  1.00  1.00      1S   
ATOM   1713 N    TYR   127     -43.046  14.510 -33.448  1.00  1.00      1S   
ATOM   1714 HN   TYR   127     -43.061  15.367 -32.937  1.00  0.00      1S   
ATOM   1715 CA   TYR   127     -41.814  13.761 -33.367  1.00  1.00      1S   
ATOM   1716 HA   TYR   127     -41.508  13.526 -34.378  1.00  0.00      1S   
ATOM   1717 CB   TYR   127     -40.718  14.621 -32.679  1.00  1.00      1S   
ATOM   1718 HB1  TYR   127     -41.000  14.857 -31.632  1.00  0.00      1S   
ATOM   1719 HB2  TYR   127     -40.614  15.581 -33.231  1.00  0.00      1S   
ATOM   1720 CG   TYR   127     -39.373  13.946 -32.681  1.00  1.00      1S   
ATOM   1721 CD1  TYR   127     -38.549  14.024 -33.812  1.00  1.00      1S   
ATOM   1722 HD1  TYR   127     -38.871  14.579 -34.682  1.00  0.00      1S   
ATOM   1723 CE1  TYR   127     -37.310  13.380 -33.821  1.00  1.00      1S   
ATOM   1724 HE1  TYR   127     -36.683  13.460 -34.683  1.00  0.00      1S   
ATOM   1725 CZ   TYR   127     -36.878  12.647 -32.713  1.00  1.00      1S   
ATOM   1726 OH   TYR   127     -35.616  12.015 -32.744  1.00  1.00      1S   
ATOM   1727 HH   TYR   127     -35.305  12.026 -33.652  1.00  0.00      1S   
ATOM   1728 CD2  TYR   127     -38.932  13.218 -31.561  1.00  1.00      1S   
ATOM   1729 HD2  TYR   127     -39.560  13.149 -30.686  1.00  0.00      1S   
ATOM   1730 CE2  TYR   127     -37.692  12.567 -31.578  1.00  1.00      1S   
ATOM   1731 HE2  TYR   127     -37.363  12.010 -30.712  1.00  0.00      1S   
ATOM   1732 C    TYR   127     -42.019  12.458 -32.617  1.00  1.00      1S   
ATOM   1733 O    TYR   127     -41.597  11.399 -33.076  1.00  1.00      1S   
ATOM   1734 N    SER   128     -42.674  12.508 -31.437  1.00  1.00      1S   
ATOM   1735 HN   SER   128     -43.044  13.367 -31.087  1.00  0.00      1S   
ATOM   1736 CA   SER   128     -42.790  11.362 -30.560  1.00  1.00      1S   
ATOM   1737 HA   SER   128     -41.835  10.854 -30.569  1.00  0.00      1S   
ATOM   1738 CB   SER   128     -43.048  11.775 -29.087  1.00  1.00      1S   
ATOM   1739 HB1  SER   128     -42.213  12.425 -28.744  1.00  0.00      1S   
ATOM   1740 HB2  SER   128     -43.073  10.875 -28.436  1.00  0.00      1S   
ATOM   1741 OG   SER   128     -44.263  12.499 -28.925  1.00  1.00      1S   
ATOM   1742 HG1  SER   128     -44.039  13.427 -29.039  1.00  0.00      1S   
ATOM   1743 C    SER   128     -43.829  10.356 -31.025  1.00  1.00      1S   
ATOM   1744 O    SER   128     -43.712   9.173 -30.710  1.00  1.00      1S   
ATOM   1745 N    THR   129     -44.864  10.797 -31.785  1.00  1.00      1S   
ATOM   1746 HN   THR   129     -44.944  11.764 -32.022  1.00  0.00      1S   
ATOM   1747 CA   THR   129     -45.958   9.946 -32.227  1.00  1.00      1S   
ATOM   1748 HA   THR   129     -45.897   9.004 -31.702  1.00  0.00      1S   
ATOM   1749 CB   THR   129     -47.352  10.518 -31.939  1.00  1.00      1S   
ATOM   1750 HB   THR   129     -48.112   9.729 -32.142  1.00  0.00      1S   
ATOM   1751 OG1  THR   129     -47.691  11.639 -32.752  1.00  1.00      1S   
ATOM   1752 HG1  THR   129     -47.068  12.335 -32.515  1.00  0.00      1S   
ATOM   1753 CG2  THR   129     -47.472  10.917 -30.455  1.00  1.00      1S   
ATOM   1754 HG21 THR   129     -46.760  11.729 -30.197  1.00  0.00      1S   
ATOM   1755 HG22 THR   129     -47.260  10.045 -29.801  1.00  0.00      1S   
ATOM   1756 HG23 THR   129     -48.499  11.281 -30.239  1.00  0.00      1S   
ATOM   1757 C    THR   129     -45.871   9.630 -33.705  1.00  1.00      1S   
ATOM   1758 O    THR   129     -46.705   8.882 -34.217  1.00  1.00      1S   
ATOM   1759 N    GLY   130     -44.881  10.202 -34.433  1.00  1.00      1S   
ATOM   1760 HN   GLY   130     -44.195  10.786 -34.004  1.00  0.00      1S   
ATOM   1761 CA   GLY   130     -44.802  10.103 -35.877  1.00  1.00      1S   
ATOM   1762 HA1  GLY   130     -43.991  10.743 -36.195  1.00  0.00      1S   
ATOM   1763 HA2  GLY   130     -45.759  10.393 -36.288  1.00  0.00      1S   
ATOM   1764 C    GLY   130     -44.484   8.703 -36.303  1.00  1.00      1S   
ATOM   1765 O    GLY   130     -43.634   8.045 -35.704  1.00  1.00      1S   
ATOM   1766 N    LYS   131     -45.196   8.209 -37.340  1.00  1.00      1S   
ATOM   1767 HN   LYS   131     -45.844   8.767 -37.853  1.00  0.00      1S   
ATOM   1768 CA   LYS   131     -45.103   6.831 -37.742  1.00  1.00      1S   
ATOM   1769 HA   LYS   131     -44.149   6.434 -37.426  1.00  0.00      1S   
ATOM   1770 CB   LYS   131     -46.234   5.941 -37.170  1.00  1.00      1S   
ATOM   1771 HB1  LYS   131     -46.094   5.872 -36.077  1.00  0.00      1S   
ATOM   1772 HB2  LYS   131     -46.139   4.909 -37.573  1.00  0.00      1S   
ATOM   1773 CG   LYS   131     -47.670   6.445 -37.387  1.00  1.00      1S   
ATOM   1774 HG1  LYS   131     -47.832   6.623 -38.474  1.00  0.00      1S   
ATOM   1775 HG2  LYS   131     -47.813   7.413 -36.859  1.00  0.00      1S   
ATOM   1776 CD   LYS   131     -48.722   5.427 -36.908  1.00  1.00      1S   
ATOM   1777 HD1  LYS   131     -48.523   4.466 -37.434  1.00  0.00      1S   
ATOM   1778 HD2  LYS   131     -49.730   5.773 -37.223  1.00  0.00      1S   
ATOM   1779 CE   LYS   131     -48.732   5.151 -35.394  1.00  1.00      1S   
ATOM   1780 HE1  LYS   131     -47.727   4.863 -35.024  1.00  0.00      1S   
ATOM   1781 HE2  LYS   131     -49.440   4.325 -35.171  1.00  0.00      1S   
ATOM   1782 NZ   LYS   131     -49.179   6.338 -34.627  1.00  1.00      1S   
ATOM   1783 HZ1  LYS   131     -50.094   6.662 -35.001  1.00  0.00      1S   
ATOM   1784 HZ2  LYS   131     -48.478   7.102 -34.716  1.00  0.00      1S   
ATOM   1785 HZ3  LYS   131     -49.289   6.082 -33.625  1.00  0.00      1S   
ATOM   1786 C    LYS   131     -45.139   6.735 -39.233  1.00  1.00      1S   
ATOM   1787 O    LYS   131     -45.721   7.574 -39.917  1.00  1.00      1S   
ATOM   1788 N    VAL   132     -44.497   5.671 -39.759  1.00  1.00      1S   
ATOM   1789 HN   VAL   132     -44.011   5.026 -39.169  1.00  0.00      1S   
ATOM   1790 CA   VAL   132     -44.504   5.329 -41.157  1.00  1.00      1S   
ATOM   1791 HA   VAL   132     -45.218   5.951 -41.682  1.00  0.00      1S   
ATOM   1792 CB   VAL   132     -43.146   5.444 -41.835  1.00  1.00      1S   
ATOM   1793 HB   VAL   132     -43.229   5.116 -42.898  1.00  0.00      1S   
ATOM   1794 CG1  VAL   132     -42.737   6.925 -41.827  1.00  1.00      1S   
ATOM   1795 HG11 VAL   132     -42.651   7.316 -40.792  1.00  0.00      1S   
ATOM   1796 HG12 VAL   132     -43.493   7.522 -42.375  1.00  0.00      1S   
ATOM   1797 HG13 VAL   132     -41.755   7.046 -42.325  1.00  0.00      1S   
ATOM   1798 CG2  VAL   132     -42.072   4.583 -41.145  1.00  1.00      1S   
ATOM   1799 HG21 VAL   132     -42.308   3.502 -41.209  1.00  0.00      1S   
ATOM   1800 HG22 VAL   132     -41.968   4.863 -40.076  1.00  0.00      1S   
ATOM   1801 HG23 VAL   132     -41.092   4.745 -41.644  1.00  0.00      1S   
ATOM   1802 C    VAL   132     -44.987   3.916 -41.228  1.00  1.00      1S   
ATOM   1803 O    VAL   132     -44.658   3.095 -40.377  1.00  1.00      1S   
ATOM   1804 N    CYS   133     -45.804   3.600 -42.248  1.00  1.00      1S   
ATOM   1805 HN   CYS   133     -46.074   4.271 -42.934  1.00  0.00      1S   
ATOM   1806 CA   CYS   133     -46.337   2.274 -42.433  1.00  1.00      1S   
ATOM   1807 HA   CYS   133     -45.995   1.618 -41.654  1.00  0.00      1S   
ATOM   1808 CB   CYS   133     -47.883   2.251 -42.469  1.00  1.00      1S   
ATOM   1809 HB1  CYS   133     -48.246   1.202 -42.416  1.00  0.00      1S   
ATOM   1810 HB2  CYS   133     -48.234   2.680 -43.432  1.00  0.00      1S   
ATOM   1811 SG   CYS   133     -48.599   3.251 -41.115  1.00  1.00      1S   
ATOM   1812 C    CYS   133     -45.739   1.787 -43.712  1.00  1.00      1S   
ATOM   1813 O    CYS   133     -45.473   2.579 -44.616  1.00  1.00      1S   
ATOM   1814 N    ASN   134     -45.466   0.463 -43.810  1.00  1.00      1S   
ATOM   1815 HN   ASN   134     -45.718  -0.183 -43.090  1.00  0.00      1S   
ATOM   1816 CA   ASN   134     -44.746  -0.094 -44.935  1.00  1.00      1S   
ATOM   1817 HA   ASN   134     -43.893   0.546 -45.092  1.00  0.00      1S   
ATOM   1818 CB   ASN   134     -44.197  -1.522 -44.652  1.00  1.00      1S   
ATOM   1819 HB1  ASN   134     -43.598  -1.495 -43.716  1.00  0.00      1S   
ATOM   1820 HB2  ASN   134     -43.523  -1.849 -45.469  1.00  0.00      1S   
ATOM   1821 CG   ASN   134     -45.323  -2.542 -44.462  1.00  1.00      1S   
ATOM   1822 OD1  ASN   134     -45.980  -2.569 -43.419  1.00  1.00      1S   
ATOM   1823 ND2  ASN   134     -45.555  -3.378 -45.513  1.00  1.00      1S   
ATOM   1824 HD21 ASN   134     -46.294  -4.046 -45.453  1.00  0.00      1S   
ATOM   1825 HD22 ASN   134     -45.004  -3.307 -46.346  1.00  0.00      1S   
ATOM   1826 C    ASN   134     -45.628  -0.039 -46.170  1.00  1.00      1S   
ATOM   1827 O    ASN   134     -46.849  -0.073 -46.016  1.00  1.00      1S   
ATOM   1828 N    PRO   135     -45.100   0.067 -47.392  1.00  1.00      1S   
ATOM   1829 CD   PRO   135     -43.662   0.123 -47.664  1.00  1.00      1S   
ATOM   1830 HD1  PRO   135     -43.131  -0.750 -47.231  1.00  0.00      1S   
ATOM   1831 HD2  PRO   135     -43.263   1.070 -47.246  1.00  0.00      1S   
ATOM   1832 CA   PRO   135     -45.890   0.395 -48.574  1.00  1.00      1S   
ATOM   1833 HA   PRO   135     -46.570   1.201 -48.334  1.00  0.00      1S   
ATOM   1834 CB   PRO   135     -44.839   0.811 -49.623  1.00  1.00      1S   
ATOM   1835 HB1  PRO   135     -44.693   1.913 -49.561  1.00  0.00      1S   
ATOM   1836 HB2  PRO   135     -45.116   0.550 -50.663  1.00  0.00      1S   
ATOM   1837 CG   PRO   135     -43.545   0.123 -49.185  1.00  1.00      1S   
ATOM   1838 HG1  PRO   135     -43.534  -0.926 -49.557  1.00  0.00      1S   
ATOM   1839 HG2  PRO   135     -42.639   0.654 -49.540  1.00  0.00      1S   
ATOM   1840 C    PRO   135     -46.713  -0.782 -49.056  1.00  1.00      1S   
ATOM   1841 O    PRO   135     -47.284  -0.688 -50.142  1.00  1.00      1S   
ATOM   1842 N    ASP   136     -46.795  -1.880 -48.271  1.00  1.00      1S   
ATOM   1843 HN   ASP   136     -46.320  -1.904 -47.396  1.00  0.00      1S   
ATOM   1844 CA   ASP   136     -47.519  -3.077 -48.620  1.00  1.00      1S   
ATOM   1845 HA   ASP   136     -47.941  -2.965 -49.609  1.00  0.00      1S   
ATOM   1846 CB   ASP   136     -46.617  -4.339 -48.609  1.00  1.00      1S   
ATOM   1847 HB1  ASP   136     -47.144  -5.181 -49.106  1.00  0.00      1S   
ATOM   1848 HB2  ASP   136     -46.379  -4.649 -47.573  1.00  0.00      1S   
ATOM   1849 CG   ASP   136     -45.308  -4.063 -49.351  1.00  1.00      1S   
ATOM   1850 OD1  ASP   136     -45.369  -3.732 -50.564  1.00  1.00      1S   
ATOM   1851 OD2  ASP   136     -44.233  -4.169 -48.702  1.00  1.00      1S   
ATOM   1852 C    ASP   136     -48.663  -3.303 -47.655  1.00  1.00      1S   
ATOM   1853 O    ASP   136     -49.644  -3.948 -48.020  1.00  1.00      1S   
ATOM   1854 N    ASN   137     -48.568  -2.802 -46.395  1.00  1.00      1S   
ATOM   1855 HN   ASN   137     -47.808  -2.221 -46.112  1.00  0.00      1S   
ATOM   1856 CA   ASN   137     -49.534  -3.117 -45.363  1.00  1.00      1S   
ATOM   1857 HA   ASN   137     -50.421  -3.534 -45.815  1.00  0.00      1S   
ATOM   1858 CB   ASN   137     -48.980  -4.182 -44.378  1.00  1.00      1S   
ATOM   1859 HB1  ASN   137     -48.161  -3.760 -43.765  1.00  0.00      1S   
ATOM   1860 HB2  ASN   137     -48.558  -5.021 -44.973  1.00  0.00      1S   
ATOM   1861 CG   ASN   137     -50.078  -4.758 -43.474  1.00  1.00      1S   
ATOM   1862 OD1  ASN   137     -51.264  -4.452 -43.631  1.00  1.00      1S   
ATOM   1863 ND2  ASN   137     -49.658  -5.628 -42.509  1.00  1.00      1S   
ATOM   1864 HD21 ASN   137     -48.680  -5.829 -42.415  1.00  0.00      1S   
ATOM   1865 HD22 ASN   137     -50.321  -6.030 -41.882  1.00  0.00      1S   
ATOM   1866 C    ASN   137     -49.877  -1.830 -44.632  1.00  1.00      1S   
ATOM   1867 O    ASN   137     -49.094  -1.400 -43.784  1.00  1.00      1S   
ATOM   1868 N    PRO   138     -51.020  -1.184 -44.894  1.00  1.00      1S   
ATOM   1869 CD   PRO   138     -51.827  -1.442 -46.093  1.00  1.00      1S   
ATOM   1870 HD1  PRO   138     -52.600  -2.197 -45.835  1.00  0.00      1S   
ATOM   1871 HD2  PRO   138     -51.212  -1.798 -46.949  1.00  0.00      1S   
ATOM   1872 CA   PRO   138     -51.349   0.112 -44.306  1.00  1.00      1S   
ATOM   1873 HA   PRO   138     -50.504   0.768 -44.465  1.00  0.00      1S   
ATOM   1874 CB   PRO   138     -52.604   0.565 -45.073  1.00  1.00      1S   
ATOM   1875 HB1  PRO   138     -52.663   1.670 -45.154  1.00  0.00      1S   
ATOM   1876 HB2  PRO   138     -53.530   0.182 -44.589  1.00  0.00      1S   
ATOM   1877 CG   PRO   138     -52.469  -0.102 -46.442  1.00  1.00      1S   
ATOM   1878 HG1  PRO   138     -53.441  -0.219 -46.960  1.00  0.00      1S   
ATOM   1879 HG2  PRO   138     -51.774   0.487 -47.079  1.00  0.00      1S   
ATOM   1880 C    PRO   138     -51.652   0.079 -42.821  1.00  1.00      1S   
ATOM   1881 O    PRO   138     -51.863   1.151 -42.256  1.00  1.00      1S   
ATOM   1882 N    GLN   139     -51.700  -1.111 -42.175  1.00  1.00      1S   
ATOM   1883 HN   GLN   139     -51.546  -1.966 -42.664  1.00  0.00      1S   
ATOM   1884 CA   GLN   139     -51.998  -1.228 -40.764  1.00  1.00      1S   
ATOM   1885 HA   GLN   139     -52.343  -0.274 -40.389  1.00  0.00      1S   
ATOM   1886 CB   GLN   139     -53.124  -2.253 -40.480  1.00  1.00      1S   
ATOM   1887 HB1  GLN   139     -54.058  -1.881 -40.959  1.00  0.00      1S   
ATOM   1888 HB2  GLN   139     -53.317  -2.258 -39.385  1.00  0.00      1S   
ATOM   1889 CG   GLN   139     -52.851  -3.668 -41.029  1.00  1.00      1S   
ATOM   1890 HG1  GLN   139     -51.778  -3.768 -41.292  1.00  0.00      1S   
ATOM   1891 HG2  GLN   139     -53.450  -3.820 -41.953  1.00  0.00      1S   
ATOM   1892 CD   GLN   139     -53.172  -4.769 -40.010  1.00  1.00      1S   
ATOM   1893 OE1  GLN   139     -53.212  -4.547 -38.796  1.00  1.00      1S   
ATOM   1894 NE2  GLN   139     -53.373  -6.015 -40.534  1.00  1.00      1S   
ATOM   1895 HE21 GLN   139     -53.561  -6.778 -39.919  1.00  0.00      1S   
ATOM   1896 HE22 GLN   139     -53.328  -6.154 -41.523  1.00  0.00      1S   
ATOM   1897 C    GLN   139     -50.767  -1.590 -39.957  1.00  1.00      1S   
ATOM   1898 O    GLN   139     -50.774  -1.444 -38.736  1.00  1.00      1S   
ATOM   1899 N    GLU   140     -49.674  -2.055 -40.610  1.00  1.00      1S   
ATOM   1900 HN   GLU   140     -49.664  -2.146 -41.603  1.00  0.00      1S   
ATOM   1901 CA   GLU   140     -48.430  -2.396 -39.948  1.00  1.00      1S   
ATOM   1902 HA   GLU   140     -48.606  -2.604 -38.901  1.00  0.00      1S   
ATOM   1903 CB   GLU   140     -47.767  -3.629 -40.606  1.00  1.00      1S   
ATOM   1904 HB1  GLU   140     -47.841  -3.493 -41.706  1.00  0.00      1S   
ATOM   1905 HB2  GLU   140     -48.368  -4.525 -40.334  1.00  0.00      1S   
ATOM   1906 CG   GLU   140     -46.290  -3.903 -40.250  1.00  1.00      1S   
ATOM   1907 HG1  GLU   140     -46.194  -4.126 -39.167  1.00  0.00      1S   
ATOM   1908 HG2  GLU   140     -45.661  -3.019 -40.487  1.00  0.00      1S   
ATOM   1909 CD   GLU   140     -45.746  -5.081 -41.065  1.00  1.00      1S   
ATOM   1910 OE1  GLU   140     -44.816  -5.758 -40.553  1.00  1.00      1S   
ATOM   1911 OE2  GLU   140     -46.237  -5.316 -42.202  1.00  1.00      1S   
ATOM   1912 C    GLU   140     -47.526  -1.199 -40.063  1.00  1.00      1S   
ATOM   1913 O    GLU   140     -47.087  -0.842 -41.156  1.00  1.00      1S   
ATOM   1914 N    CYS   141     -47.255  -0.530 -38.918  1.00  1.00      1S   
ATOM   1915 HN   CYS   141     -47.603  -0.842 -38.037  1.00  0.00      1S   
ATOM   1916 CA   CYS   141     -46.531   0.719 -38.900  1.00  1.00      1S   
ATOM   1917 HA   CYS   141     -46.070   0.878 -39.857  1.00  0.00      1S   
ATOM   1918 CB   CYS   141     -47.441   1.927 -38.561  1.00  1.00      1S   
ATOM   1919 HB1  CYS   141     -46.871   2.874 -38.680  1.00  0.00      1S   
ATOM   1920 HB2  CYS   141     -47.748   1.853 -37.494  1.00  0.00      1S   
ATOM   1921 SG   CYS   141     -48.960   1.975 -39.574  1.00  1.00      1S   
ATOM   1922 C    CYS   141     -45.415   0.646 -37.895  1.00  1.00      1S   
ATOM   1923 O    CYS   141     -45.411  -0.201 -37.004  1.00  1.00      1S   
ATOM   1924 N    LEU   142     -44.427   1.557 -38.044  1.00  1.00      1S   
ATOM   1925 HN   LEU   142     -44.448   2.205 -38.806  1.00  0.00      1S   
ATOM   1926 CA   LEU   142     -43.290   1.691 -37.170  1.00  1.00      1S   
ATOM   1927 HA   LEU   142     -43.416   1.070 -36.295  1.00  0.00      1S   
ATOM   1928 CB   LEU   142     -41.949   1.382 -37.881  1.00  1.00      1S   
ATOM   1929 HB1  LEU   142     -41.103   1.600 -37.193  1.00  0.00      1S   
ATOM   1930 HB2  LEU   142     -41.843   2.053 -38.763  1.00  0.00      1S   
ATOM   1931 CG   LEU   142     -41.802  -0.075 -38.371  1.00  1.00      1S   
ATOM   1932 HG   LEU   142     -42.654  -0.297 -39.054  1.00  0.00      1S   
ATOM   1933 CD1  LEU   142     -40.506  -0.233 -39.186  1.00  1.00      1S   
ATOM   1934 HD11 LEU   142     -39.622  -0.014 -38.551  1.00  0.00      1S   
ATOM   1935 HD12 LEU   142     -40.504   0.468 -40.046  1.00  0.00      1S   
ATOM   1936 HD13 LEU   142     -40.416  -1.270 -39.574  1.00  0.00      1S   
ATOM   1937 CD2  LEU   142     -41.848  -1.092 -37.215  1.00  1.00      1S   
ATOM   1938 HD21 LEU   142     -42.811  -1.031 -36.668  1.00  0.00      1S   
ATOM   1939 HD22 LEU   142     -41.020  -0.902 -36.501  1.00  0.00      1S   
ATOM   1940 HD23 LEU   142     -41.741  -2.125 -37.610  1.00  0.00      1S   
ATOM   1941 C    LEU   142     -43.214   3.123 -36.726  1.00  1.00      1S   
ATOM   1942 O    LEU   142     -43.400   4.039 -37.523  1.00  1.00      1S   
ATOM   1943 N    LEU   143     -42.888   3.336 -35.429  1.00  1.00      1S   
ATOM   1944 HN   LEU   143     -42.793   2.573 -34.797  1.00  0.00      1S   
ATOM   1945 CA   LEU   143     -42.508   4.626 -34.894  1.00  1.00      1S   
ATOM   1946 HA   LEU   143     -42.983   5.415 -35.458  1.00  0.00      1S   
ATOM   1947 CB   LEU   143     -42.786   4.770 -33.369  1.00  1.00      1S   
ATOM   1948 HB1  LEU   143     -42.323   5.707 -32.988  1.00  0.00      1S   
ATOM   1949 HB2  LEU   143     -42.300   3.919 -32.840  1.00  0.00      1S   
ATOM   1950 CG   LEU   143     -44.269   4.814 -32.935  1.00  1.00      1S   
ATOM   1951 HG   LEU   143     -44.744   3.850 -33.229  1.00  0.00      1S   
ATOM   1952 CD1  LEU   143     -44.366   4.971 -31.407  1.00  1.00      1S   
ATOM   1953 HD11 LEU   143     -43.881   5.923 -31.099  1.00  0.00      1S   
ATOM   1954 HD12 LEU   143     -43.853   4.133 -30.892  1.00  0.00      1S   
ATOM   1955 HD13 LEU   143     -45.428   5.000 -31.085  1.00  0.00      1S   
ATOM   1956 CD2  LEU   143     -45.045   5.959 -33.597  1.00  1.00      1S   
ATOM   1957 HD21 LEU   143     -44.810   6.006 -34.673  1.00  0.00      1S   
ATOM   1958 HD22 LEU   143     -44.759   6.934 -33.149  1.00  0.00      1S   
ATOM   1959 HD23 LEU   143     -46.139   5.816 -33.472  1.00  0.00      1S   
ATOM   1960 C    LEU   143     -41.020   4.752 -35.067  1.00  1.00      1S   
ATOM   1961 O    LEU   143     -40.350   3.798 -35.456  1.00  1.00      1S   
ATOM   1962 N    LEU   144     -40.457   5.940 -34.738  1.00  1.00      1S   
ATOM   1963 HN   LEU   144     -41.020   6.720 -34.478  1.00  0.00      1S   
ATOM   1964 CA   LEU   144     -39.028   6.159 -34.700  1.00  1.00      1S   
ATOM   1965 HA   LEU   144     -38.645   5.933 -35.681  1.00  0.00      1S   
ATOM   1966 CB   LEU   144     -38.661   7.615 -34.334  1.00  1.00      1S   
ATOM   1967 HB1  LEU   144     -39.129   7.885 -33.362  1.00  0.00      1S   
ATOM   1968 HB2  LEU   144     -39.098   8.281 -35.105  1.00  0.00      1S   
ATOM   1969 CG   LEU   144     -37.142   7.907 -34.260  1.00  1.00      1S   
ATOM   1970 HG   LEU   144     -36.688   7.220 -33.508  1.00  0.00      1S   
ATOM   1971 CD1  LEU   144     -36.428   7.664 -35.602  1.00  1.00      1S   
ATOM   1972 HD11 LEU   144     -36.928   8.231 -36.416  1.00  0.00      1S   
ATOM   1973 HD12 LEU   144     -36.434   6.585 -35.856  1.00  0.00      1S   
ATOM   1974 HD13 LEU   144     -35.369   7.993 -35.537  1.00  0.00      1S   
ATOM   1975 CD2  LEU   144     -36.870   9.328 -33.754  1.00  1.00      1S   
ATOM   1976 HD21 LEU   144     -37.347   9.489 -32.764  1.00  0.00      1S   
ATOM   1977 HD22 LEU   144     -37.266  10.080 -34.467  1.00  0.00      1S   
ATOM   1978 HD23 LEU   144     -35.776   9.485 -33.646  1.00  0.00      1S   
ATOM   1979 C    LEU   144     -38.375   5.234 -33.704  1.00  1.00      1S   
ATOM   1980 O    LEU   144     -37.473   4.479 -34.053  1.00  1.00      1S   
ATOM   1981 N    GLU   145     -38.840   5.266 -32.440  1.00  1.00      1S   
ATOM   1982 HN   GLU   145     -39.594   5.864 -32.178  1.00  0.00      1S   
ATOM   1983 CA   GLU   145     -38.304   4.444 -31.390  1.00  1.00      1S   
ATOM   1984 HA   GLU   145     -37.432   3.919 -31.743  1.00  0.00      1S   
ATOM   1985 CB   GLU   145     -37.888   5.321 -30.182  1.00  1.00      1S   
ATOM   1986 HB1  GLU   145     -38.744   5.970 -29.896  1.00  0.00      1S   
ATOM   1987 HB2  GLU   145     -37.070   5.996 -30.520  1.00  0.00      1S   
ATOM   1988 CG   GLU   145     -37.412   4.574 -28.917  1.00  1.00      1S   
ATOM   1989 HG1  GLU   145     -38.259   4.000 -28.485  1.00  0.00      1S   
ATOM   1990 HG2  GLU   145     -37.085   5.322 -28.162  1.00  0.00      1S   
ATOM   1991 CD   GLU   145     -36.247   3.618 -29.179  1.00  1.00      1S   
ATOM   1992 OE1  GLU   145     -35.404   3.906 -30.068  1.00  1.00      1S   
ATOM   1993 OE2  GLU   145     -36.189   2.573 -28.479  1.00  1.00      1S   
ATOM   1994 C    GLU   145     -39.392   3.466 -31.010  1.00  1.00      1S   
ATOM   1995 O    GLU   145     -40.464   3.923 -30.610  1.00  1.00      1S   
ATOM   1996 N    PRO   146     -39.230   2.143 -31.091  1.00  1.00      1S   
ATOM   1997 CD   PRO   146     -40.258   1.255 -30.547  1.00  1.00      1S   
ATOM   1998 HD1  PRO   146     -41.217   1.391 -31.092  1.00  0.00      1S   
ATOM   1999 HD2  PRO   146     -40.394   1.479 -29.466  1.00  0.00      1S   
ATOM   2000 CA   PRO   146     -38.009   1.422 -31.439  1.00  1.00      1S   
ATOM   2001 HA   PRO   146     -37.138   1.954 -31.092  1.00  0.00      1S   
ATOM   2002 CB   PRO   146     -38.191   0.070 -30.732  1.00  1.00      1S   
ATOM   2003 HB1  PRO   146     -37.836   0.167 -29.682  1.00  0.00      1S   
ATOM   2004 HB2  PRO   146     -37.641  -0.764 -31.215  1.00  0.00      1S   
ATOM   2005 CG   PRO   146     -39.705  -0.159 -30.728  1.00  1.00      1S   
ATOM   2006 HG1  PRO   146     -40.027  -0.562 -31.713  1.00  0.00      1S   
ATOM   2007 HG2  PRO   146     -40.026  -0.848 -29.922  1.00  0.00      1S   
ATOM   2008 C    PRO   146     -37.852   1.156 -32.918  1.00  1.00      1S   
ATOM   2009 O    PRO   146     -36.772   0.710 -33.296  1.00  1.00      1S   
ATOM   2010 N    GLY   147     -38.895   1.350 -33.760  1.00  1.00      1S   
ATOM   2011 HN   GLY   147     -39.729   1.797 -33.447  1.00  0.00      1S   
ATOM   2012 CA   GLY   147     -38.976   0.706 -35.059  1.00  1.00      1S   
ATOM   2013 HA1  GLY   147     -39.936   0.972 -35.473  1.00  0.00      1S   
ATOM   2014 HA2  GLY   147     -38.874  -0.359 -34.900  1.00  0.00      1S   
ATOM   2015 C    GLY   147     -37.922   1.120 -36.042  1.00  1.00      1S   
ATOM   2016 O    GLY   147     -37.146   0.294 -36.518  1.00  1.00      1S   
ATOM   2017 N    LEU   148     -37.872   2.422 -36.381  1.00  1.00      1S   
ATOM   2018 HN   LEU   148     -38.506   3.084 -35.984  1.00  0.00      1S   
ATOM   2019 CA   LEU   148     -36.964   2.932 -37.378  1.00  1.00      1S   
ATOM   2020 HA   LEU   148     -36.972   2.251 -38.217  1.00  0.00      1S   
ATOM   2021 CB   LEU   148     -37.368   4.331 -37.873  1.00  1.00      1S   
ATOM   2022 HB1  LEU   148     -36.637   4.661 -38.642  1.00  0.00      1S   
ATOM   2023 HB2  LEU   148     -37.325   5.047 -37.027  1.00  0.00      1S   
ATOM   2024 CG   LEU   148     -38.774   4.390 -38.507  1.00  1.00      1S   
ATOM   2025 HG   LEU   148     -39.517   4.047 -37.753  1.00  0.00      1S   
ATOM   2026 CD1  LEU   148     -39.141   5.838 -38.873  1.00  1.00      1S   
ATOM   2027 HD11 LEU   148     -38.435   6.225 -39.636  1.00  0.00      1S   
ATOM   2028 HD12 LEU   148     -39.086   6.489 -37.975  1.00  0.00      1S   
ATOM   2029 HD13 LEU   148     -40.170   5.891 -39.284  1.00  0.00      1S   
ATOM   2030 CD2  LEU   148     -38.888   3.460 -39.727  1.00  1.00      1S   
ATOM   2031 HD21 LEU   148     -38.704   2.403 -39.444  1.00  0.00      1S   
ATOM   2032 HD22 LEU   148     -38.155   3.757 -40.506  1.00  0.00      1S   
ATOM   2033 HD23 LEU   148     -39.904   3.513 -40.159  1.00  0.00      1S   
ATOM   2034 C    LEU   148     -35.549   2.978 -36.871  1.00  1.00      1S   
ATOM   2035 O    LEU   148     -34.623   2.716 -37.628  1.00  1.00      1S   
ATOM   2036 N    ASN   149     -35.340   3.261 -35.567  1.00  1.00      1S   
ATOM   2037 HN   ASN   149     -36.105   3.499 -34.968  1.00  0.00      1S   
ATOM   2038 CA   ASN   149     -34.035   3.249 -34.937  1.00  1.00      1S   
ATOM   2039 HA   ASN   149     -33.391   3.912 -35.500  1.00  0.00      1S   
ATOM   2040 CB   ASN   149     -34.102   3.683 -33.452  1.00  1.00      1S   
ATOM   2041 HB1  ASN   149     -33.167   3.405 -32.917  1.00  0.00      1S   
ATOM   2042 HB2  ASN   149     -34.958   3.179 -32.954  1.00  0.00      1S   
ATOM   2043 CG   ASN   149     -34.250   5.205 -33.354  1.00  1.00      1S   
ATOM   2044 OD1  ASN   149     -33.930   5.952 -34.284  1.00  1.00      1S   
ATOM   2045 ND2  ASN   149     -34.726   5.678 -32.165  1.00  1.00      1S   
ATOM   2046 HD21 ASN   149     -34.962   5.031 -31.431  1.00  0.00      1S   
ATOM   2047 HD22 ASN   149     -34.820   6.659 -32.024  1.00  0.00      1S   
ATOM   2048 C    ASN   149     -33.386   1.887 -34.990  1.00  1.00      1S   
ATOM   2049 O    ASN   149     -32.173   1.800 -35.164  1.00  1.00      1S   
ATOM   2050 N    GLU   150     -34.177   0.793 -34.882  1.00  1.00      1S   
ATOM   2051 HN   GLU   150     -35.159   0.877 -34.723  1.00  0.00      1S   
ATOM   2052 CA   GLU   150     -33.680  -0.563 -34.989  1.00  1.00      1S   
ATOM   2053 HA   GLU   150     -32.844  -0.657 -34.308  1.00  0.00      1S   
ATOM   2054 CB   GLU   150     -34.756  -1.600 -34.580  1.00  1.00      1S   
ATOM   2055 HB1  GLU   150     -35.643  -1.517 -35.242  1.00  0.00      1S   
ATOM   2056 HB2  GLU   150     -35.093  -1.320 -33.555  1.00  0.00      1S   
ATOM   2057 CG   GLU   150     -34.281  -3.070 -34.494  1.00  1.00      1S   
ATOM   2058 HG1  GLU   150     -35.021  -3.647 -33.898  1.00  0.00      1S   
ATOM   2059 HG2  GLU   150     -33.302  -3.117 -33.971  1.00  0.00      1S   
ATOM   2060 CD   GLU   150     -34.164  -3.747 -35.864  1.00  1.00      1S   
ATOM   2061 OE1  GLU   150     -33.225  -4.569 -36.034  1.00  1.00      1S   
ATOM   2062 OE2  GLU   150     -35.013  -3.459 -36.749  1.00  1.00      1S   
ATOM   2063 C    GLU   150     -33.171  -0.829 -36.387  1.00  1.00      1S   
ATOM   2064 O    GLU   150     -32.098  -1.399 -36.558  1.00  1.00      1S   
ATOM   2065 N    ILE   151     -33.898  -0.368 -37.431  1.00  1.00      1S   
ATOM   2066 HN   ILE   151     -34.770   0.092 -37.280  1.00  0.00      1S   
ATOM   2067 CA   ILE   151     -33.487  -0.494 -38.819  1.00  1.00      1S   
ATOM   2068 HA   ILE   151     -33.320  -1.544 -39.018  1.00  0.00      1S   
ATOM   2069 CB   ILE   151     -34.549   0.035 -39.782  1.00  1.00      1S   
ATOM   2070 HB   ILE   151     -34.821   1.074 -39.490  1.00  0.00      1S   
ATOM   2071 CG2  ILE   151     -34.013   0.082 -41.235  1.00  1.00      1S   
ATOM   2072 HG21 ILE   151     -33.673  -0.925 -41.553  1.00  0.00      1S   
ATOM   2073 HG22 ILE   151     -33.169   0.796 -41.339  1.00  0.00      1S   
ATOM   2074 HG23 ILE   151     -34.803   0.422 -41.934  1.00  0.00      1S   
ATOM   2075 CG1  ILE   151     -35.823  -0.834 -39.660  1.00  1.00      1S   
ATOM   2076 HG11 ILE   151     -36.146  -0.873 -38.597  1.00  0.00      1S   
ATOM   2077 HG12 ILE   151     -35.581  -1.875 -39.969  1.00  0.00      1S   
ATOM   2078 CD   ILE   151     -36.996  -0.318 -40.494  1.00  1.00      1S   
ATOM   2079 HD1  ILE   151     -36.785  -0.419 -41.579  1.00  0.00      1S   
ATOM   2080 HD2  ILE   151     -37.193   0.751 -40.265  1.00  0.00      1S   
ATOM   2081 HD3  ILE   151     -37.911  -0.904 -40.266  1.00  0.00      1S   
ATOM   2082 C    ILE   151     -32.186   0.237 -39.046  1.00  1.00      1S   
ATOM   2083 O    ILE   151     -31.234  -0.311 -39.595  1.00  1.00      1S   
ATOM   2084 N    MET   152     -32.103   1.505 -38.604  1.00  1.00      1S   
ATOM   2085 HN   MET   152     -32.864   1.938 -38.122  1.00  0.00      1S   
ATOM   2086 CA   MET   152     -30.974   2.349 -38.894  1.00  1.00      1S   
ATOM   2087 HA   MET   152     -30.730   2.218 -39.939  1.00  0.00      1S   
ATOM   2088 CB   MET   152     -31.317   3.834 -38.668  1.00  1.00      1S   
ATOM   2089 HB1  MET   152     -30.421   4.448 -38.896  1.00  0.00      1S   
ATOM   2090 HB2  MET   152     -31.586   3.998 -37.601  1.00  0.00      1S   
ATOM   2091 CG   MET   152     -32.475   4.334 -39.557  1.00  1.00      1S   
ATOM   2092 HG1  MET   152     -32.639   5.411 -39.350  1.00  0.00      1S   
ATOM   2093 HG2  MET   152     -33.404   3.818 -39.249  1.00  0.00      1S   
ATOM   2094 SD   MET   152     -32.258   4.068 -41.345  1.00  1.00      1S   
ATOM   2095 CE   MET   152     -30.874   5.199 -41.635  1.00  1.00      1S   
ATOM   2096 HE1  MET   152     -29.981   4.908 -41.043  1.00  0.00      1S   
ATOM   2097 HE2  MET   152     -31.147   6.240 -41.363  1.00  0.00      1S   
ATOM   2098 HE3  MET   152     -30.589   5.187 -42.707  1.00  0.00      1S   
ATOM   2099 C    MET   152     -29.735   1.974 -38.115  1.00  1.00      1S   
ATOM   2100 O    MET   152     -28.636   2.343 -38.515  1.00  1.00      1S   
ATOM   2101 N    ALA   153     -29.861   1.202 -37.013  1.00  1.00      1S   
ATOM   2102 HN   ALA   153     -30.757   0.916 -36.677  1.00  0.00      1S   
ATOM   2103 CA   ALA   153     -28.728   0.773 -36.228  1.00  1.00      1S   
ATOM   2104 HA   ALA   153     -27.900   1.442 -36.395  1.00  0.00      1S   
ATOM   2105 CB   ALA   153     -29.044   0.797 -34.722  1.00  1.00      1S   
ATOM   2106 HB1  ALA   153     -29.900   0.130 -34.484  1.00  0.00      1S   
ATOM   2107 HB2  ALA   153     -29.312   1.831 -34.416  1.00  0.00      1S   
ATOM   2108 HB3  ALA   153     -28.163   0.479 -34.125  1.00  0.00      1S   
ATOM   2109 C    ALA   153     -28.250  -0.610 -36.599  1.00  1.00      1S   
ATOM   2110 O    ALA   153     -27.091  -0.933 -36.344  1.00  1.00      1S   
ATOM   2111 N    ASN   154     -29.121  -1.471 -37.182  1.00  1.00      1S   
ATOM   2112 HN   ASN   154     -30.048  -1.189 -37.421  1.00  0.00      1S   
ATOM   2113 CA   ASN   154     -28.838  -2.891 -37.292  1.00  1.00      1S   
ATOM   2114 HA   ASN   154     -27.840  -3.097 -36.927  1.00  0.00      1S   
ATOM   2115 CB   ASN   154     -29.839  -3.748 -36.478  1.00  1.00      1S   
ATOM   2116 HB1  ASN   154     -29.627  -4.831 -36.615  1.00  0.00      1S   
ATOM   2117 HB2  ASN   154     -30.877  -3.554 -36.818  1.00  0.00      1S   
ATOM   2118 CG   ASN   154     -29.732  -3.400 -34.988  1.00  1.00      1S   
ATOM   2119 OD1  ASN   154     -30.483  -2.578 -34.456  1.00  1.00      1S   
ATOM   2120 ND2  ASN   154     -28.752  -4.052 -34.294  1.00  1.00      1S   
ATOM   2121 HD21 ASN   154     -28.641  -3.868 -33.321  1.00  0.00      1S   
ATOM   2122 HD22 ASN   154     -28.163  -4.711 -34.763  1.00  0.00      1S   
ATOM   2123 C    ASN   154     -28.872  -3.395 -38.711  1.00  1.00      1S   
ATOM   2124 O    ASN   154     -28.192  -4.373 -39.019  1.00  1.00      1S   
ATOM   2125 N    SER   155     -29.664  -2.775 -39.618  1.00  1.00      1S   
ATOM   2126 HN   SER   155     -30.188  -1.956 -39.390  1.00  0.00      1S   
ATOM   2127 CA   SER   155     -29.865  -3.302 -40.955  1.00  1.00      1S   
ATOM   2128 HA   SER   155     -30.042  -4.366 -40.867  1.00  0.00      1S   
ATOM   2129 CB   SER   155     -31.091  -2.669 -41.667  1.00  1.00      1S   
ATOM   2130 HB1  SER   155     -30.945  -1.574 -41.777  1.00  0.00      1S   
ATOM   2131 HB2  SER   155     -31.998  -2.835 -41.046  1.00  0.00      1S   
ATOM   2132 OG   SER   155     -31.320  -3.228 -42.957  1.00  1.00      1S   
ATOM   2133 HG1  SER   155     -32.265  -3.429 -43.015  1.00  0.00      1S   
ATOM   2134 C    SER   155     -28.633  -3.090 -41.802  1.00  1.00      1S   
ATOM   2135 O    SER   155     -27.966  -2.065 -41.699  1.00  1.00      1S   
ATOM   2136 N    LEU   156     -28.320  -4.086 -42.662  1.00  1.00      1S   
ATOM   2137 HN   LEU   156     -28.830  -4.942 -42.657  1.00  0.00      1S   
ATOM   2138 CA   LEU   156     -27.287  -3.987 -43.665  1.00  1.00      1S   
ATOM   2139 HA   LEU   156     -26.725  -3.074 -43.529  1.00  0.00      1S   
ATOM   2140 CB   LEU   156     -26.326  -5.199 -43.645  1.00  1.00      1S   
ATOM   2141 HB1  LEU   156     -25.602  -5.108 -44.487  1.00  0.00      1S   
ATOM   2142 HB2  LEU   156     -26.907  -6.134 -43.799  1.00  0.00      1S   
ATOM   2143 CG   LEU   156     -25.502  -5.338 -42.345  1.00  1.00      1S   
ATOM   2144 HG   LEU   156     -26.206  -5.546 -41.506  1.00  0.00      1S   
ATOM   2145 CD1  LEU   156     -24.538  -6.534 -42.450  1.00  1.00      1S   
ATOM   2146 HD11 LEU   156     -23.820  -6.376 -43.283  1.00  0.00      1S   
ATOM   2147 HD12 LEU   156     -25.104  -7.470 -42.642  1.00  0.00      1S   
ATOM   2148 HD13 LEU   156     -23.965  -6.653 -41.506  1.00  0.00      1S   
ATOM   2149 CD2  LEU   156     -24.733  -4.048 -42.000  1.00  1.00      1S   
ATOM   2150 HD21 LEU   156     -25.431  -3.238 -41.704  1.00  0.00      1S   
ATOM   2151 HD22 LEU   156     -24.150  -3.708 -42.880  1.00  0.00      1S   
ATOM   2152 HD23 LEU   156     -24.035  -4.227 -41.155  1.00  0.00      1S   
ATOM   2153 C    LEU   156     -27.910  -3.920 -45.038  1.00  1.00      1S   
ATOM   2154 O    LEU   156     -27.202  -3.811 -46.036  1.00  1.00      1S   
ATOM   2155 N    ASP   157     -29.254  -3.973 -45.150  1.00  1.00      1S   
ATOM   2156 HN   ASP   157     -29.853  -4.016 -44.352  1.00  0.00      1S   
ATOM   2157 CA   ASP   157     -29.913  -3.945 -46.434  1.00  1.00      1S   
ATOM   2158 HA   ASP   157     -29.298  -4.464 -47.159  1.00  0.00      1S   
ATOM   2159 CB   ASP   157     -31.299  -4.639 -46.378  1.00  1.00      1S   
ATOM   2160 HB1  ASP   157     -31.942  -4.144 -45.622  1.00  0.00      1S   
ATOM   2161 HB2  ASP   157     -31.162  -5.697 -46.068  1.00  0.00      1S   
ATOM   2162 CG   ASP   157     -31.994  -4.617 -47.741  1.00  1.00      1S   
ATOM   2163 OD1  ASP   157     -31.653  -5.472 -48.598  1.00  1.00      1S   
ATOM   2164 OD2  ASP   157     -32.851  -3.721 -47.949  1.00  1.00      1S   
ATOM   2165 C    ASP   157     -30.055  -2.500 -46.849  1.00  1.00      1S   
ATOM   2166 O    ASP   157     -30.691  -1.711 -46.157  1.00  1.00      1S   
ATOM   2167 N    TYR   158     -29.464  -2.136 -48.013  1.00  1.00      1S   
ATOM   2168 HN   TYR   158     -28.977  -2.814 -48.557  1.00  0.00      1S   
ATOM   2169 CA   TYR   158     -29.409  -0.786 -48.538  1.00  1.00      1S   
ATOM   2170 HA   TYR   158     -28.847  -0.194 -47.828  1.00  0.00      1S   
ATOM   2171 CB   TYR   158     -28.670  -0.770 -49.910  1.00  1.00      1S   
ATOM   2172 HB1  TYR   158     -29.216  -1.398 -50.647  1.00  0.00      1S   
ATOM   2173 HB2  TYR   158     -27.655  -1.205 -49.781  1.00  0.00      1S   
ATOM   2174 CG   TYR   158     -28.506   0.615 -50.499  1.00  1.00      1S   
ATOM   2175 CD1  TYR   158     -29.518   1.159 -51.310  1.00  1.00      1S   
ATOM   2176 HD1  TYR   158     -30.410   0.584 -51.496  1.00  0.00      1S   
ATOM   2177 CE1  TYR   158     -29.385   2.429 -51.879  1.00  1.00      1S   
ATOM   2178 HE1  TYR   158     -30.179   2.825 -52.495  1.00  0.00      1S   
ATOM   2179 CZ   TYR   158     -28.218   3.169 -51.657  1.00  1.00      1S   
ATOM   2180 OH   TYR   158     -28.059   4.443 -52.241  1.00  1.00      1S   
ATOM   2181 HH   TYR   158     -28.782   4.579 -52.857  1.00  0.00      1S   
ATOM   2182 CD2  TYR   158     -27.346   1.373 -50.271  1.00  1.00      1S   
ATOM   2183 HD2  TYR   158     -26.553   0.968 -49.661  1.00  0.00      1S   
ATOM   2184 CE2  TYR   158     -27.203   2.642 -50.849  1.00  1.00      1S   
ATOM   2185 HE2  TYR   158     -26.306   3.218 -50.676  1.00  0.00      1S   
ATOM   2186 C    TYR   158     -30.789  -0.169 -48.673  1.00  1.00      1S   
ATOM   2187 O    TYR   158     -30.993   0.976 -48.276  1.00  1.00      1S   
ATOM   2188 N    ASN   159     -31.762  -0.921 -49.235  1.00  1.00      1S   
ATOM   2189 HN   ASN   159     -31.597  -1.874 -49.482  1.00  0.00      1S   
ATOM   2190 CA   ASN   159     -33.071  -0.405 -49.570  1.00  1.00      1S   
ATOM   2191 HA   ASN   159     -32.945   0.592 -49.971  1.00  0.00      1S   
ATOM   2192 CB   ASN   159     -33.803  -1.296 -50.601  1.00  1.00      1S   
ATOM   2193 HB1  ASN   159     -34.879  -1.021 -50.663  1.00  0.00      1S   
ATOM   2194 HB2  ASN   159     -33.723  -2.361 -50.296  1.00  0.00      1S   
ATOM   2195 CG   ASN   159     -33.198  -1.090 -51.995  1.00  1.00      1S   
ATOM   2196 OD1  ASN   159     -32.642  -0.034 -52.310  1.00  1.00      1S   
ATOM   2197 ND2  ASN   159     -33.346  -2.129 -52.869  1.00  1.00      1S   
ATOM   2198 HD21 ASN   159     -33.822  -2.959 -52.580  1.00  0.00      1S   
ATOM   2199 HD22 ASN   159     -32.996  -2.039 -53.798  1.00  0.00      1S   
ATOM   2200 C    ASN   159     -33.959  -0.257 -48.361  1.00  1.00      1S   
ATOM   2201 O    ASN   159     -34.780   0.655 -48.321  1.00  1.00      1S   
ATOM   2202 N    GLU   160     -33.811  -1.124 -47.334  1.00  1.00      1S   
ATOM   2203 HN   GLU   160     -33.188  -1.905 -47.408  1.00  0.00      1S   
ATOM   2204 CA   GLU   160     -34.553  -1.039 -46.094  1.00  1.00      1S   
ATOM   2205 HA   GLU   160     -35.605  -0.982 -46.335  1.00  0.00      1S   
ATOM   2206 CB   GLU   160     -34.295  -2.263 -45.189  1.00  1.00      1S   
ATOM   2207 HB1  GLU   160     -33.232  -2.254 -44.859  1.00  0.00      1S   
ATOM   2208 HB2  GLU   160     -34.443  -3.186 -45.795  1.00  0.00      1S   
ATOM   2209 CG   GLU   160     -35.230  -2.337 -43.966  1.00  1.00      1S   
ATOM   2210 HG1  GLU   160     -36.272  -2.523 -44.303  1.00  0.00      1S   
ATOM   2211 HG2  GLU   160     -35.211  -1.377 -43.409  1.00  0.00      1S   
ATOM   2212 CD   GLU   160     -34.812  -3.450 -43.006  1.00  1.00      1S   
ATOM   2213 OE1  GLU   160     -35.452  -3.555 -41.928  1.00  1.00      1S   
ATOM   2214 OE2  GLU   160     -33.851  -4.199 -43.322  1.00  1.00      1S   
ATOM   2215 C    GLU   160     -34.153   0.202 -45.335  1.00  1.00      1S   
ATOM   2216 O    GLU   160     -35.001   0.956 -44.860  1.00  1.00      1S   
ATOM   2217 N    ARG   161     -32.826   0.458 -45.251  1.00  1.00      1S   
ATOM   2218 HN   ARG   161     -32.163  -0.186 -45.630  1.00  0.00      1S   
ATOM   2219 CA   ARG   161     -32.262   1.637 -44.637  1.00  1.00      1S   
ATOM   2220 HA   ARG   161     -32.624   1.692 -43.620  1.00  0.00      1S   
ATOM   2221 CB   ARG   161     -30.722   1.608 -44.632  1.00  1.00      1S   
ATOM   2222 HB1  ARG   161     -30.344   2.575 -44.228  1.00  0.00      1S   
ATOM   2223 HB2  ARG   161     -30.349   1.500 -45.674  1.00  0.00      1S   
ATOM   2224 CG   ARG   161     -30.128   0.471 -43.789  1.00  1.00      1S   
ATOM   2225 HG1  ARG   161     -30.479  -0.504 -44.180  1.00  0.00      1S   
ATOM   2226 HG2  ARG   161     -30.500   0.550 -42.744  1.00  0.00      1S   
ATOM   2227 CD   ARG   161     -28.596   0.474 -43.810  1.00  1.00      1S   
ATOM   2228 HD1  ARG   161     -28.225   0.511 -44.857  1.00  0.00      1S   
ATOM   2229 HD2  ARG   161     -28.167  -0.419 -43.324  1.00  0.00      1S   
ATOM   2230 NE   ARG   161     -28.120   1.707 -43.109  1.00  1.00      1S   
ATOM   2231 HE   ARG   161     -28.061   2.553 -43.638  1.00  0.00      1S   
ATOM   2232 CZ   ARG   161     -28.015   1.820 -41.756  1.00  1.00      1S   
ATOM   2233 NH1  ARG   161     -28.185   0.754 -40.932  1.00  1.00      1S   
ATOM   2234 HH11 ARG   161     -28.352  -0.156 -41.319  1.00  0.00      1S   
ATOM   2235 HH12 ARG   161     -28.149   0.887 -39.945  1.00  0.00      1S   
ATOM   2236 NH2  ARG   161     -27.750   3.041 -41.220  1.00  1.00      1S   
ATOM   2237 HH21 ARG   161     -27.685   3.834 -41.820  1.00  0.00      1S   
ATOM   2238 HH22 ARG   161     -27.742   3.137 -40.221  1.00  0.00      1S   
ATOM   2239 C    ARG   161     -32.678   2.894 -45.359  1.00  1.00      1S   
ATOM   2240 O    ARG   161     -32.977   3.901 -44.723  1.00  1.00      1S   
ATOM   2241 N    LEU   162     -32.731   2.851 -46.714  1.00  1.00      1S   
ATOM   2242 HN   LEU   162     -32.463   2.028 -47.212  1.00  0.00      1S   
ATOM   2243 CA   LEU   162     -33.140   3.969 -47.533  1.00  1.00      1S   
ATOM   2244 HA   LEU   162     -32.541   4.815 -47.228  1.00  0.00      1S   
ATOM   2245 CB   LEU   162     -32.943   3.713 -49.048  1.00  1.00      1S   
ATOM   2246 HB1  LEU   162     -33.507   2.805 -49.351  1.00  0.00      1S   
ATOM   2247 HB2  LEU   162     -31.864   3.507 -49.226  1.00  0.00      1S   
ATOM   2248 CG   LEU   162     -33.371   4.892 -49.957  1.00  1.00      1S   
ATOM   2249 HG   LEU   162     -34.476   5.017 -49.873  1.00  0.00      1S   
ATOM   2250 CD1  LEU   162     -32.722   6.214 -49.518  1.00  1.00      1S   
ATOM   2251 HD11 LEU   162     -31.623   6.085 -49.434  1.00  0.00      1S   
ATOM   2252 HD12 LEU   162     -33.113   6.555 -48.537  1.00  0.00      1S   
ATOM   2253 HD13 LEU   162     -32.934   7.009 -50.260  1.00  0.00      1S   
ATOM   2254 CD2  LEU   162     -33.071   4.613 -51.440  1.00  1.00      1S   
ATOM   2255 HD21 LEU   162     -33.588   3.689 -51.773  1.00  0.00      1S   
ATOM   2256 HD22 LEU   162     -31.978   4.490 -51.595  1.00  0.00      1S   
ATOM   2257 HD23 LEU   162     -33.424   5.462 -52.064  1.00  0.00      1S   
ATOM   2258 C    LEU   162     -34.586   4.306 -47.294  1.00  1.00      1S   
ATOM   2259 O    LEU   162     -34.934   5.474 -47.137  1.00  1.00      1S   
ATOM   2260 N    TRP   163     -35.460   3.276 -47.224  1.00  1.00      1S   
ATOM   2261 HN   TRP   163     -35.151   2.335 -47.361  1.00  0.00      1S   
ATOM   2262 CA   TRP   163     -36.870   3.429 -46.962  1.00  1.00      1S   
ATOM   2263 HA   TRP   163     -37.271   4.080 -47.727  1.00  0.00      1S   
ATOM   2264 CB   TRP   163     -37.620   2.070 -47.023  1.00  1.00      1S   
ATOM   2265 HB1  TRP   163     -37.075   1.326 -46.405  1.00  0.00      1S   
ATOM   2266 HB2  TRP   163     -37.593   1.714 -48.077  1.00  0.00      1S   
ATOM   2267 CG   TRP   163     -39.072   2.114 -46.575  1.00  1.00      1S   
ATOM   2268 CD1  TRP   163     -40.159   2.633 -47.220  1.00  1.00      1S   
ATOM   2269 HD1  TRP   163     -40.143   3.049 -48.217  1.00  0.00      1S   
ATOM   2270 NE1  TRP   163     -41.268   2.571 -46.410  1.00  1.00      1S   
ATOM   2271 HE1  TRP   163     -42.166   2.877 -46.643  1.00  0.00      1S   
ATOM   2272 CE2  TRP   163     -40.905   2.010 -45.206  1.00  1.00      1S   
ATOM   2273 CD2  TRP   163     -39.527   1.714 -45.266  1.00  1.00      1S   
ATOM   2274 CE3  TRP   163     -38.861   1.153 -44.179  1.00  1.00      1S   
ATOM   2275 HE3  TRP   163     -37.805   0.933 -44.199  1.00  0.00      1S   
ATOM   2276 CZ3  TRP   163     -39.611   0.868 -43.028  1.00  1.00      1S   
ATOM   2277 HZ3  TRP   163     -39.127   0.423 -42.173  1.00  0.00      1S   
ATOM   2278 CZ2  TRP   163     -41.641   1.740 -44.057  1.00  1.00      1S   
ATOM   2279 HZ2  TRP   163     -42.691   1.976 -43.987  1.00  0.00      1S   
ATOM   2280 CH2  TRP   163     -40.983   1.151 -42.971  1.00  1.00      1S   
ATOM   2281 HH2  TRP   163     -41.542   0.917 -42.076  1.00  0.00      1S   
ATOM   2282 C    TRP   163     -37.093   4.102 -45.628  1.00  1.00      1S   
ATOM   2283 O    TRP   163     -37.837   5.072 -45.566  1.00  1.00      1S   
ATOM   2284 N    ALA   164     -36.431   3.628 -44.548  1.00  1.00      1S   
ATOM   2285 HN   ALA   164     -35.816   2.844 -44.630  1.00  0.00      1S   
ATOM   2286 CA   ALA   164     -36.577   4.167 -43.214  1.00  1.00      1S   
ATOM   2287 HA   ALA   164     -37.626   4.120 -42.954  1.00  0.00      1S   
ATOM   2288 CB   ALA   164     -35.770   3.347 -42.193  1.00  1.00      1S   
ATOM   2289 HB1  ALA   164     -34.700   3.313 -42.484  1.00  0.00      1S   
ATOM   2290 HB2  ALA   164     -36.150   2.304 -42.165  1.00  0.00      1S   
ATOM   2291 HB3  ALA   164     -35.855   3.777 -41.172  1.00  0.00      1S   
ATOM   2292 C    ALA   164     -36.137   5.611 -43.130  1.00  1.00      1S   
ATOM   2293 O    ALA   164     -36.847   6.445 -42.571  1.00  1.00      1S   
ATOM   2294 N    TRP   165     -34.967   5.935 -43.728  1.00  1.00      1S   
ATOM   2295 HN   TRP   165     -34.416   5.227 -44.168  1.00  0.00      1S   
ATOM   2296 CA   TRP   165     -34.397   7.264 -43.779  1.00  1.00      1S   
ATOM   2297 HA   TRP   165     -34.248   7.588 -42.761  1.00  0.00      1S   
ATOM   2298 CB   TRP   165     -33.032   7.242 -44.518  1.00  1.00      1S   
ATOM   2299 HB1  TRP   165     -33.184   6.979 -45.587  1.00  0.00      1S   
ATOM   2300 HB2  TRP   165     -32.424   6.429 -44.062  1.00  0.00      1S   
ATOM   2301 CG   TRP   165     -32.201   8.511 -44.427  1.00  1.00      1S   
ATOM   2302 CD1  TRP   165     -31.261   8.834 -43.489  1.00  1.00      1S   
ATOM   2303 HD1  TRP   165     -30.979   8.206 -42.657  1.00  0.00      1S   
ATOM   2304 NE1  TRP   165     -30.740  10.079 -43.744  1.00  1.00      1S   
ATOM   2305 HE1  TRP   165     -30.071  10.539 -43.200  1.00  0.00      1S   
ATOM   2306 CE2  TRP   165     -31.359  10.595 -44.858  1.00  1.00      1S   
ATOM   2307 CD2  TRP   165     -32.274   9.633 -45.332  1.00  1.00      1S   
ATOM   2308 CE3  TRP   165     -33.040   9.870 -46.470  1.00  1.00      1S   
ATOM   2309 HE3  TRP   165     -33.712   9.136 -46.877  1.00  0.00      1S   
ATOM   2310 CZ3  TRP   165     -32.913  11.115 -47.105  1.00  1.00      1S   
ATOM   2311 HZ3  TRP   165     -33.500  11.324 -47.987  1.00  0.00      1S   
ATOM   2312 CZ2  TRP   165     -31.218  11.817 -45.501  1.00  1.00      1S   
ATOM   2313 HZ2  TRP   165     -30.533  12.558 -45.132  1.00  0.00      1S   
ATOM   2314 CH2  TRP   165     -32.017  12.080 -46.622  1.00  1.00      1S   
ATOM   2315 HH2  TRP   165     -31.929  13.030 -47.130  1.00  0.00      1S   
ATOM   2316 C    TRP   165     -35.318   8.245 -44.466  1.00  1.00      1S   
ATOM   2317 O    TRP   165     -35.628   9.305 -43.922  1.00  1.00      1S   
ATOM   2318 N    GLU   166     -35.777   7.891 -45.688  1.00  1.00      1S   
ATOM   2319 HN   GLU   166     -35.533   7.007 -46.087  1.00  0.00      1S   
ATOM   2320 CA   GLU   166     -36.558   8.751 -46.543  1.00  1.00      1S   
ATOM   2321 HA   GLU   166     -36.074   9.717 -46.564  1.00  0.00      1S   
ATOM   2322 CB   GLU   166     -36.648   8.197 -47.991  1.00  1.00      1S   
ATOM   2323 HB1  GLU   166     -36.869   7.108 -47.939  1.00  0.00      1S   
ATOM   2324 HB2  GLU   166     -35.647   8.306 -48.467  1.00  0.00      1S   
ATOM   2325 CG   GLU   166     -37.714   8.841 -48.912  1.00  1.00      1S   
ATOM   2326 HG1  GLU   166     -38.728   8.648 -48.501  1.00  0.00      1S   
ATOM   2327 HG2  GLU   166     -37.665   8.369 -49.917  1.00  0.00      1S   
ATOM   2328 CD   GLU   166     -37.531  10.349 -49.078  1.00  1.00      1S   
ATOM   2329 OE1  GLU   166     -36.428  10.864 -48.762  1.00  1.00      1S   
ATOM   2330 OE2  GLU   166     -38.502  11.009 -49.534  1.00  1.00      1S   
ATOM   2331 C    GLU   166     -37.936   8.954 -45.997  1.00  1.00      1S   
ATOM   2332 O    GLU   166     -38.413  10.084 -45.940  1.00  1.00      1S   
ATOM   2333 N    SER   167     -38.617   7.866 -45.572  1.00  1.00      1S   
ATOM   2334 HN   SER   167     -38.207   6.955 -45.580  1.00  0.00      1S   
ATOM   2335 CA   SER   167     -39.994   7.947 -45.148  1.00  1.00      1S   
ATOM   2336 HA   SER   167     -40.506   8.558 -45.875  1.00  0.00      1S   
ATOM   2337 CB   SER   167     -40.750   6.595 -45.139  1.00  1.00      1S   
ATOM   2338 HB1  SER   167     -40.763   6.179 -46.169  1.00  0.00      1S   
ATOM   2339 HB2  SER   167     -41.803   6.754 -44.820  1.00  0.00      1S   
ATOM   2340 OG   SER   167     -40.152   5.640 -44.271  1.00  1.00      1S   
ATOM   2341 HG1  SER   167     -39.370   5.316 -44.735  1.00  0.00      1S   
ATOM   2342 C    SER   167     -40.129   8.656 -43.826  1.00  1.00      1S   
ATOM   2343 O    SER   167     -41.138   9.304 -43.595  1.00  1.00      1S   
ATOM   2344 N    TRP   168     -39.107   8.623 -42.939  1.00  1.00      1S   
ATOM   2345 HN   TRP   168     -38.294   8.065 -43.094  1.00  0.00      1S   
ATOM   2346 CA   TRP   168     -39.118   9.425 -41.730  1.00  1.00      1S   
ATOM   2347 HA   TRP   168     -40.022   9.188 -41.187  1.00  0.00      1S   
ATOM   2348 CB   TRP   168     -37.892   9.122 -40.832  1.00  1.00      1S   
ATOM   2349 HB1  TRP   168     -36.961   9.287 -41.419  1.00  0.00      1S   
ATOM   2350 HB2  TRP   168     -37.924   8.046 -40.564  1.00  0.00      1S   
ATOM   2351 CG   TRP   168     -37.798   9.918 -39.537  1.00  1.00      1S   
ATOM   2352 CD1  TRP   168     -36.833  10.816 -39.184  1.00  1.00      1S   
ATOM   2353 HD1  TRP   168     -35.981  11.076 -39.794  1.00  0.00      1S   
ATOM   2354 NE1  TRP   168     -37.127  11.367 -37.964  1.00  1.00      1S   
ATOM   2355 HE1  TRP   168     -36.594  12.057 -37.504  1.00  0.00      1S   
ATOM   2356 CE2  TRP   168     -38.307  10.854 -37.505  1.00  1.00      1S   
ATOM   2357 CD2  TRP   168     -38.761   9.911 -38.463  1.00  1.00      1S   
ATOM   2358 CE3  TRP   168     -39.936   9.201 -38.261  1.00  1.00      1S   
ATOM   2359 HE3  TRP   168     -40.306   8.481 -38.975  1.00  0.00      1S   
ATOM   2360 CZ3  TRP   168     -40.648   9.428 -37.075  1.00  1.00      1S   
ATOM   2361 HZ3  TRP   168     -41.554   8.876 -36.888  1.00  0.00      1S   
ATOM   2362 CZ2  TRP   168     -39.039  11.106 -36.354  1.00  1.00      1S   
ATOM   2363 HZ2  TRP   168     -38.712  11.831 -35.624  1.00  0.00      1S   
ATOM   2364 CH2  TRP   168     -40.218  10.387 -36.147  1.00  1.00      1S   
ATOM   2365 HH2  TRP   168     -40.797  10.553 -35.252  1.00  0.00      1S   
ATOM   2366 C    TRP   168     -39.141  10.906 -42.060  1.00  1.00      1S   
ATOM   2367 O    TRP   168     -39.913  11.670 -41.483  1.00  1.00      1S   
ATOM   2368 N    ARG   169     -38.304  11.334 -43.025  1.00  1.00      1S   
ATOM   2369 HN   ARG   169     -37.707  10.695 -43.507  1.00  0.00      1S   
ATOM   2370 CA   ARG   169     -38.171  12.718 -43.407  1.00  1.00      1S   
ATOM   2371 HA   ARG   169     -38.138  13.317 -42.507  1.00  0.00      1S   
ATOM   2372 CB   ARG   169     -36.855  12.933 -44.174  1.00  1.00      1S   
ATOM   2373 HB1  ARG   169     -36.854  13.909 -44.706  1.00  0.00      1S   
ATOM   2374 HB2  ARG   169     -36.736  12.127 -44.931  1.00  0.00      1S   
ATOM   2375 CG   ARG   169     -35.664  12.924 -43.207  1.00  1.00      1S   
ATOM   2376 HG1  ARG   169     -35.829  12.133 -42.441  1.00  0.00      1S   
ATOM   2377 HG2  ARG   169     -35.636  13.902 -42.676  1.00  0.00      1S   
ATOM   2378 CD   ARG   169     -34.324  12.668 -43.896  1.00  1.00      1S   
ATOM   2379 HD1  ARG   169     -34.122  13.440 -44.669  1.00  0.00      1S   
ATOM   2380 HD2  ARG   169     -34.294  11.663 -44.369  1.00  0.00      1S   
ATOM   2381 NE   ARG   169     -33.251  12.768 -42.862  1.00  1.00      1S   
ATOM   2382 HE   ARG   169     -32.709  13.606 -42.804  1.00  0.00      1S   
ATOM   2383 CZ   ARG   169     -32.980  11.781 -41.965  1.00  1.00      1S   
ATOM   2384 NH1  ARG   169     -32.009  11.997 -41.043  1.00  1.00      1S   
ATOM   2385 HH11 ARG   169     -31.509  12.862 -41.054  1.00  0.00      1S   
ATOM   2386 HH12 ARG   169     -31.747  11.253 -40.423  1.00  0.00      1S   
ATOM   2387 NH2  ARG   169     -33.628  10.587 -41.981  1.00  1.00      1S   
ATOM   2388 HH21 ARG   169     -34.314  10.404 -42.686  1.00  0.00      1S   
ATOM   2389 HH22 ARG   169     -33.364   9.877 -41.334  1.00  0.00      1S   
ATOM   2390 C    ARG   169     -39.334  13.214 -44.231  1.00  1.00      1S   
ATOM   2391 O    ARG   169     -39.645  14.402 -44.198  1.00  1.00      1S   
ATOM   2392 N    SER   170     -40.023  12.330 -44.984  1.00  1.00      1S   
ATOM   2393 HN   SER   170     -39.761  11.367 -45.036  1.00  0.00      1S   
ATOM   2394 CA   SER   170     -41.141  12.732 -45.806  1.00  1.00      1S   
ATOM   2395 HA   SER   170     -40.996  13.765 -46.090  1.00  0.00      1S   
ATOM   2396 CB   SER   170     -41.222  11.941 -47.139  1.00  1.00      1S   
ATOM   2397 HB1  SER   170     -40.221  11.957 -47.621  1.00  0.00      1S   
ATOM   2398 HB2  SER   170     -41.945  12.433 -47.824  1.00  0.00      1S   
ATOM   2399 OG   SER   170     -41.607  10.583 -46.964  1.00  1.00      1S   
ATOM   2400 HG1  SER   170     -41.517  10.168 -47.826  1.00  0.00      1S   
ATOM   2401 C    SER   170     -42.443  12.660 -45.035  1.00  1.00      1S   
ATOM   2402 O    SER   170     -43.352  13.446 -45.258  1.00  1.00      1S   
ATOM   2403 N    GLU   171     -42.604  11.723 -44.084  1.00  1.00      1S   
ATOM   2404 HN   GLU   171     -41.896  11.056 -43.857  1.00  0.00      1S   
ATOM   2405 CA   GLU   171     -43.872  11.591 -43.397  1.00  1.00      1S   
ATOM   2406 HA   GLU   171     -44.671  11.824 -44.088  1.00  0.00      1S   
ATOM   2407 CB   GLU   171     -44.121  10.156 -42.884  1.00  1.00      1S   
ATOM   2408 HB1  GLU   171     -43.933  10.058 -41.794  1.00  0.00      1S   
ATOM   2409 HB2  GLU   171     -43.399   9.490 -43.399  1.00  0.00      1S   
ATOM   2410 CG   GLU   171     -45.496   9.564 -43.253  1.00  1.00      1S   
ATOM   2411 HG1  GLU   171     -45.515   8.492 -42.962  1.00  0.00      1S   
ATOM   2412 HG2  GLU   171     -45.641   9.628 -44.353  1.00  0.00      1S   
ATOM   2413 CD   GLU   171     -46.640  10.278 -42.542  1.00  1.00      1S   
ATOM   2414 OE1  GLU   171     -47.633  10.625 -43.236  1.00  1.00      1S   
ATOM   2415 OE2  GLU   171     -46.548  10.472 -41.301  1.00  1.00      1S   
ATOM   2416 C    GLU   171     -43.933  12.576 -42.261  1.00  1.00      1S   
ATOM   2417 O    GLU   171     -44.940  13.250 -42.081  1.00  1.00      1S   
ATOM   2418 N    VAL   172     -42.841  12.679 -41.472  1.00  1.00      1S   
ATOM   2419 HN   VAL   172     -42.015  12.154 -41.666  1.00  0.00      1S   
ATOM   2420 CA   VAL   172     -42.818  13.433 -40.240  1.00  1.00      1S   
ATOM   2421 HA   VAL   172     -43.834  13.636 -39.931  1.00  0.00      1S   
ATOM   2422 CB   VAL   172     -42.148  12.641 -39.127  1.00  1.00      1S   
ATOM   2423 HB   VAL   172     -41.060  12.517 -39.324  1.00  0.00      1S   
ATOM   2424 CG1  VAL   172     -42.332  13.348 -37.773  1.00  1.00      1S   
ATOM   2425 HG11 VAL   172     -43.416  13.432 -37.550  1.00  0.00      1S   
ATOM   2426 HG12 VAL   172     -41.882  14.362 -37.776  1.00  0.00      1S   
ATOM   2427 HG13 VAL   172     -41.859  12.757 -36.961  1.00  0.00      1S   
ATOM   2428 CG2  VAL   172     -42.812  11.248 -39.092  1.00  1.00      1S   
ATOM   2429 HG21 VAL   172     -42.486  10.625 -39.950  1.00  0.00      1S   
ATOM   2430 HG22 VAL   172     -43.919  11.345 -39.114  1.00  0.00      1S   
ATOM   2431 HG23 VAL   172     -42.541  10.722 -38.158  1.00  0.00      1S   
ATOM   2432 C    VAL   172     -42.142  14.762 -40.471  1.00  1.00      1S   
ATOM   2433 O    VAL   172     -42.610  15.785 -39.978  1.00  1.00      1S   
ATOM   2434 N    GLY   173     -41.036  14.795 -41.253  1.00  1.00      1S   
ATOM   2435 HN   GLY   173     -40.668  13.960 -41.656  1.00  0.00      1S   
ATOM   2436 CA   GLY   173     -40.285  16.010 -41.518  1.00  1.00      1S   
ATOM   2437 HA1  GLY   173     -39.422  15.731 -42.102  1.00  0.00      1S   
ATOM   2438 HA2  GLY   173     -40.015  16.445 -40.566  1.00  0.00      1S   
ATOM   2439 C    GLY   173     -41.064  17.040 -42.299  1.00  1.00      1S   
ATOM   2440 O    GLY   173     -40.943  18.233 -42.032  1.00  1.00      1S   
ATOM   2441 N    LYS   174     -41.907  16.610 -43.272  1.00  1.00      1S   
ATOM   2442 HN   LYS   174     -41.971  15.641 -43.500  1.00  0.00      1S   
ATOM   2443 CA   LYS   174     -42.767  17.498 -44.036  1.00  1.00      1S   
ATOM   2444 HA   LYS   174     -42.148  18.285 -44.442  1.00  0.00      1S   
ATOM   2445 CB   LYS   174     -43.489  16.784 -45.203  1.00  1.00      1S   
ATOM   2446 HB1  LYS   174     -44.427  17.317 -45.480  1.00  0.00      1S   
ATOM   2447 HB2  LYS   174     -43.778  15.769 -44.862  1.00  0.00      1S   
ATOM   2448 CG   LYS   174     -42.638  16.697 -46.483  1.00  1.00      1S   
ATOM   2449 HG1  LYS   174     -41.602  16.399 -46.211  1.00  0.00      1S   
ATOM   2450 HG2  LYS   174     -42.596  17.704 -46.950  1.00  0.00      1S   
ATOM   2451 CD   LYS   174     -43.198  15.698 -47.505  1.00  1.00      1S   
ATOM   2452 HD1  LYS   174     -44.237  15.971 -47.788  1.00  0.00      1S   
ATOM   2453 HD2  LYS   174     -43.260  14.710 -47.025  1.00  0.00      1S   
ATOM   2454 CE   LYS   174     -42.315  15.470 -48.731  1.00  1.00      1S   
ATOM   2455 HE1  LYS   174     -42.456  14.435 -49.114  1.00  0.00      1S   
ATOM   2456 HE2  LYS   174     -41.244  15.628 -48.490  1.00  0.00      1S   
ATOM   2457 NZ   LYS   174     -42.704  16.386 -49.810  1.00  1.00      1S   
ATOM   2458 HZ1  LYS   174     -42.341  17.341 -49.590  1.00  0.00      1S   
ATOM   2459 HZ2  LYS   174     -43.740  16.425 -49.881  1.00  0.00      1S   
ATOM   2460 HZ3  LYS   174     -42.297  16.075 -50.713  1.00  0.00      1S   
ATOM   2461 C    LYS   174     -43.813  18.159 -43.169  1.00  1.00      1S   
ATOM   2462 O    LYS   174     -44.126  19.330 -43.374  1.00  1.00      1S   
ATOM   2463 N    GLN   175     -44.355  17.442 -42.153  1.00  1.00      1S   
ATOM   2464 HN   GLN   175     -44.106  16.488 -42.001  1.00  0.00      1S   
ATOM   2465 CA   GLN   175     -45.307  18.003 -41.214  1.00  1.00      1S   
ATOM   2466 HA   GLN   175     -46.119  18.437 -41.781  1.00  0.00      1S   
ATOM   2467 CB   GLN   175     -45.878  16.960 -40.229  1.00  1.00      1S   
ATOM   2468 HB1  GLN   175     -46.564  17.484 -39.523  1.00  0.00      1S   
ATOM   2469 HB2  GLN   175     -45.049  16.513 -39.636  1.00  0.00      1S   
ATOM   2470 CG   GLN   175     -46.675  15.834 -40.903  1.00  1.00      1S   
ATOM   2471 HG1  GLN   175     -46.018  15.283 -41.601  1.00  0.00      1S   
ATOM   2472 HG2  GLN   175     -47.522  16.260 -41.480  1.00  0.00      1S   
ATOM   2473 CD   GLN   175     -47.234  14.903 -39.819  1.00  1.00      1S   
ATOM   2474 OE1  GLN   175     -47.861  15.366 -38.859  1.00  1.00      1S   
ATOM   2475 NE2  GLN   175     -47.006  13.566 -39.974  1.00  1.00      1S   
ATOM   2476 HE21 GLN   175     -46.486  13.232 -40.765  1.00  0.00      1S   
ATOM   2477 HE22 GLN   175     -47.371  12.921 -39.308  1.00  0.00      1S   
ATOM   2478 C    GLN   175     -44.687  19.085 -40.362  1.00  1.00      1S   
ATOM   2479 O    GLN   175     -45.350  20.053 -39.994  1.00  1.00      1S   
ATOM   2480 N    LEU   176     -43.384  18.943 -40.034  1.00  1.00      1S   
ATOM   2481 HN   LEU   176     -42.851  18.166 -40.365  1.00  0.00      1S   
ATOM   2482 CA   LEU   176     -42.687  19.848 -39.153  1.00  1.00      1S   
ATOM   2483 HA   LEU   176     -43.360  20.136 -38.358  1.00  0.00      1S   
ATOM   2484 CB   LEU   176     -41.425  19.197 -38.549  1.00  1.00      1S   
ATOM   2485 HB1  LEU   176     -40.847  19.948 -37.965  1.00  0.00      1S   
ATOM   2486 HB2  LEU   176     -40.774  18.832 -39.374  1.00  0.00      1S   
ATOM   2487 CG   LEU   176     -41.759  18.020 -37.609  1.00  1.00      1S   
ATOM   2488 HG   LEU   176     -42.481  17.352 -38.130  1.00  0.00      1S   
ATOM   2489 CD1  LEU   176     -40.518  17.172 -37.290  1.00  1.00      1S   
ATOM   2490 HD11 LEU   176     -39.770  17.785 -36.749  1.00  0.00      1S   
ATOM   2491 HD12 LEU   176     -40.059  16.787 -38.224  1.00  0.00      1S   
ATOM   2492 HD13 LEU   176     -40.797  16.309 -36.648  1.00  0.00      1S   
ATOM   2493 CD2  LEU   176     -42.436  18.504 -36.317  1.00  1.00      1S   
ATOM   2494 HD21 LEU   176     -43.400  19.009 -36.536  1.00  0.00      1S   
ATOM   2495 HD22 LEU   176     -41.774  19.217 -35.782  1.00  0.00      1S   
ATOM   2496 HD23 LEU   176     -42.639  17.643 -35.648  1.00  0.00      1S   
ATOM   2497 C    LEU   176     -42.272  21.105 -39.854  1.00  1.00      1S   
ATOM   2498 O    LEU   176     -41.975  22.094 -39.190  1.00  1.00      1S   
ATOM   2499 N    ARG   177     -42.258  21.109 -41.207  1.00  1.00      1S   
ATOM   2500 HN   ARG   177     -42.523  20.297 -41.722  1.00  0.00      1S   
ATOM   2501 CA   ARG   177     -41.844  22.240 -42.002  1.00  1.00      1S   
ATOM   2502 HA   ARG   177     -40.830  22.429 -41.684  1.00  0.00      1S   
ATOM   2503 CB   ARG   177     -41.800  21.929 -43.521  1.00  1.00      1S   
ATOM   2504 HB1  ARG   177     -42.811  21.644 -43.878  1.00  0.00      1S   
ATOM   2505 HB2  ARG   177     -41.142  21.047 -43.682  1.00  0.00      1S   
ATOM   2506 CG   ARG   177     -41.278  23.090 -44.383  1.00  1.00      1S   
ATOM   2507 HG1  ARG   177     -41.975  23.952 -44.282  1.00  0.00      1S   
ATOM   2508 HG2  ARG   177     -41.291  22.778 -45.452  1.00  0.00      1S   
ATOM   2509 CD   ARG   177     -39.857  23.529 -44.009  1.00  1.00      1S   
ATOM   2510 HD1  ARG   177     -39.122  22.741 -44.255  1.00  0.00      1S   
ATOM   2511 HD2  ARG   177     -39.770  23.767 -42.929  1.00  0.00      1S   
ATOM   2512 NE   ARG   177     -39.567  24.794 -44.738  1.00  1.00      1S   
ATOM   2513 HE   ARG   177     -40.145  25.592 -44.555  1.00  0.00      1S   
ATOM   2514 CZ   ARG   177     -38.589  24.945 -45.672  1.00  1.00      1S   
ATOM   2515 NH1  ARG   177     -38.435  26.173 -46.227  1.00  1.00      1S   
ATOM   2516 HH11 ARG   177     -37.698  26.343 -46.886  1.00  0.00      1S   
ATOM   2517 HH12 ARG   177     -39.049  26.910 -45.950  1.00  0.00      1S   
ATOM   2518 NH2  ARG   177     -37.779  23.925 -46.053  1.00  1.00      1S   
ATOM   2519 HH21 ARG   177     -37.940  23.003 -45.699  1.00  0.00      1S   
ATOM   2520 HH22 ARG   177     -37.111  24.082 -46.783  1.00  0.00      1S   
ATOM   2521 C    ARG   177     -42.607  23.522 -41.720  1.00  1.00      1S   
ATOM   2522 O    ARG   177     -41.929  24.466 -41.319  1.00  1.00      1S   
ATOM   2523 N    PRO   178     -43.931  23.679 -41.848  1.00  1.00      1S   
ATOM   2524 CD   PRO   178     -44.867  22.662 -42.327  1.00  1.00      1S   
ATOM   2525 HD1  PRO   178     -44.655  21.662 -41.901  1.00  0.00      1S   
ATOM   2526 HD2  PRO   178     -44.814  22.627 -43.437  1.00  0.00      1S   
ATOM   2527 CA   PRO   178     -44.596  24.963 -41.645  1.00  1.00      1S   
ATOM   2528 HA   PRO   178     -44.124  25.708 -42.270  1.00  0.00      1S   
ATOM   2529 CB   PRO   178     -46.065  24.693 -42.022  1.00  1.00      1S   
ATOM   2530 HB1  PRO   178     -46.220  24.968 -43.088  1.00  0.00      1S   
ATOM   2531 HB2  PRO   178     -46.793  25.252 -41.400  1.00  0.00      1S   
ATOM   2532 CG   PRO   178     -46.229  23.176 -41.877  1.00  1.00      1S   
ATOM   2533 HG1  PRO   178     -46.383  22.914 -40.807  1.00  0.00      1S   
ATOM   2534 HG2  PRO   178     -47.064  22.771 -42.482  1.00  0.00      1S   
ATOM   2535 C    PRO   178     -44.504  25.427 -40.210  1.00  1.00      1S   
ATOM   2536 O    PRO   178     -44.433  26.634 -39.982  1.00  1.00      1S   
ATOM   2537 N    LEU   179     -44.483  24.487 -39.240  1.00  1.00      1S   
ATOM   2538 HN   LEU   179     -44.569  23.521 -39.470  1.00  0.00      1S   
ATOM   2539 CA   LEU   179     -44.374  24.780 -37.831  1.00  1.00      1S   
ATOM   2540 HA   LEU   179     -45.121  25.520 -37.578  1.00  0.00      1S   
ATOM   2541 CB   LEU   179     -44.567  23.515 -36.973  1.00  1.00      1S   
ATOM   2542 HB1  LEU   179     -44.341  23.738 -35.907  1.00  0.00      1S   
ATOM   2543 HB2  LEU   179     -43.847  22.738 -37.316  1.00  0.00      1S   
ATOM   2544 CG   LEU   179     -45.991  22.926 -37.040  1.00  1.00      1S   
ATOM   2545 HG   LEU   179     -46.309  22.890 -38.107  1.00  0.00      1S   
ATOM   2546 CD1  LEU   179     -45.987  21.481 -36.523  1.00  1.00      1S   
ATOM   2547 HD11 LEU   179     -45.667  21.451 -35.460  1.00  0.00      1S   
ATOM   2548 HD12 LEU   179     -45.289  20.859 -37.123  1.00  0.00      1S   
ATOM   2549 HD13 LEU   179     -47.004  21.044 -36.604  1.00  0.00      1S   
ATOM   2550 CD2  LEU   179     -47.010  23.787 -36.268  1.00  1.00      1S   
ATOM   2551 HD21 LEU   179     -47.058  24.815 -36.686  1.00  0.00      1S   
ATOM   2552 HD22 LEU   179     -46.724  23.854 -35.197  1.00  0.00      1S   
ATOM   2553 HD23 LEU   179     -48.022  23.336 -36.334  1.00  0.00      1S   
ATOM   2554 C    LEU   179     -43.023  25.352 -37.506  1.00  1.00      1S   
ATOM   2555 O    LEU   179     -42.929  26.302 -36.734  1.00  1.00      1S   
ATOM   2556 N    TYR   180     -41.942  24.800 -38.112  1.00  1.00      1S   
ATOM   2557 HN   TYR   180     -42.043  24.024 -38.734  1.00  0.00      1S   
ATOM   2558 CA   TYR   180     -40.584  25.230 -37.871  1.00  1.00      1S   
ATOM   2559 HA   TYR   180     -40.468  25.239 -36.797  1.00  0.00      1S   
ATOM   2560 CB   TYR   180     -39.523  24.275 -38.483  1.00  1.00      1S   
ATOM   2561 HB1  TYR   180     -39.385  24.458 -39.570  1.00  0.00      1S   
ATOM   2562 HB2  TYR   180     -39.849  23.222 -38.345  1.00  0.00      1S   
ATOM   2563 CG   TYR   180     -38.206  24.422 -37.758  1.00  1.00      1S   
ATOM   2564 CD1  TYR   180     -38.075  23.941 -36.445  1.00  1.00      1S   
ATOM   2565 HD1  TYR   180     -38.903  23.439 -35.974  1.00  0.00      1S   
ATOM   2566 CE1  TYR   180     -36.887  24.124 -35.729  1.00  1.00      1S   
ATOM   2567 HE1  TYR   180     -36.818  23.767 -34.712  1.00  0.00      1S   
ATOM   2568 CZ   TYR   180     -35.807  24.788 -36.326  1.00  1.00      1S   
ATOM   2569 OH   TYR   180     -34.625  25.013 -35.589  1.00  1.00      1S   
ATOM   2570 HH   TYR   180     -34.826  24.845 -34.665  1.00  0.00      1S   
ATOM   2571 CD2  TYR   180     -37.111  25.074 -38.348  1.00  1.00      1S   
ATOM   2572 HD2  TYR   180     -37.193  25.454 -39.350  1.00  0.00      1S   
ATOM   2573 CE2  TYR   180     -35.916  25.256 -37.641  1.00  1.00      1S   
ATOM   2574 HE2  TYR   180     -35.091  25.776 -38.105  1.00  0.00      1S   
ATOM   2575 C    TYR   180     -40.362  26.634 -38.383  1.00  1.00      1S   
ATOM   2576 O    TYR   180     -39.646  27.408 -37.758  1.00  1.00      1S   
ATOM   2577 N    GLU   181     -41.009  27.022 -39.507  1.00  1.00      1S   
ATOM   2578 HN   GLU   181     -41.586  26.387 -40.017  1.00  0.00      1S   
ATOM   2579 CA   GLU   181     -40.924  28.366 -40.043  1.00  1.00      1S   
ATOM   2580 HA   GLU   181     -39.884  28.599 -40.190  1.00  0.00      1S   
ATOM   2581 CB   GLU   181     -41.635  28.502 -41.405  1.00  1.00      1S   
ATOM   2582 HB1  GLU   181     -41.516  29.548 -41.770  1.00  0.00      1S   
ATOM   2583 HB2  GLU   181     -42.722  28.296 -41.288  1.00  0.00      1S   
ATOM   2584 CG   GLU   181     -41.045  27.549 -42.461  1.00  1.00      1S   
ATOM   2585 HG1  GLU   181     -41.225  26.498 -42.172  1.00  0.00      1S   
ATOM   2586 HG2  GLU   181     -39.948  27.708 -42.525  1.00  0.00      1S   
ATOM   2587 CD   GLU   181     -41.652  27.777 -43.840  1.00  1.00      1S   
ATOM   2588 OE1  GLU   181     -42.655  28.531 -43.952  1.00  1.00      1S   
ATOM   2589 OE2  GLU   181     -41.088  27.211 -44.815  1.00  1.00      1S   
ATOM   2590 C    GLU   181     -41.479  29.395 -39.090  1.00  1.00      1S   
ATOM   2591 O    GLU   181     -40.880  30.450 -38.891  1.00  1.00      1S   
ATOM   2592 N    GLU   182     -42.626  29.087 -38.450  1.00  1.00      1S   
ATOM   2593 HN   GLU   182     -43.081  28.212 -38.607  1.00  0.00      1S   
ATOM   2594 CA   GLU   182     -43.301  29.986 -37.545  1.00  1.00      1S   
ATOM   2595 HA   GLU   182     -43.265  30.978 -37.976  1.00  0.00      1S   
ATOM   2596 CB   GLU   182     -44.779  29.576 -37.402  1.00  1.00      1S   
ATOM   2597 HB1  GLU   182     -44.855  28.598 -36.879  1.00  0.00      1S   
ATOM   2598 HB2  GLU   182     -45.177  29.434 -38.434  1.00  0.00      1S   
ATOM   2599 CG   GLU   182     -45.642  30.634 -36.690  1.00  1.00      1S   
ATOM   2600 HG1  GLU   182     -45.515  31.622 -37.180  1.00  0.00      1S   
ATOM   2601 HG2  GLU   182     -45.315  30.724 -35.634  1.00  0.00      1S   
ATOM   2602 CD   GLU   182     -47.124  30.258 -36.719  1.00  1.00      1S   
ATOM   2603 OE1  GLU   182     -47.532  29.460 -37.604  1.00  1.00      1S   
ATOM   2604 OE2  GLU   182     -47.872  30.779 -35.847  1.00  1.00      1S   
ATOM   2605 C    GLU   182     -42.617  30.037 -36.194  1.00  1.00      1S   
ATOM   2606 O    GLU   182     -42.592  31.079 -35.540  1.00  1.00      1S   
ATOM   2607 N    TYR   183     -41.991  28.912 -35.776  1.00  1.00      1S   
ATOM   2608 HN   TYR   183     -42.074  28.073 -36.310  1.00  0.00      1S   
ATOM   2609 CA   TYR   183     -41.141  28.795 -34.608  1.00  1.00      1S   
ATOM   2610 HA   TYR   183     -41.724  29.080 -33.743  1.00  0.00      1S   
ATOM   2611 CB   TYR   183     -40.695  27.307 -34.444  1.00  1.00      1S   
ATOM   2612 HB1  TYR   183     -40.551  26.871 -35.451  1.00  0.00      1S   
ATOM   2613 HB2  TYR   183     -41.508  26.733 -33.954  1.00  0.00      1S   
ATOM   2614 CG   TYR   183     -39.423  27.058 -33.677  1.00  1.00      1S   
ATOM   2615 CD1  TYR   183     -38.204  27.023 -34.374  1.00  1.00      1S   
ATOM   2616 HD1  TYR   183     -38.193  27.183 -35.441  1.00  0.00      1S   
ATOM   2617 CE1  TYR   183     -37.005  26.782 -33.704  1.00  1.00      1S   
ATOM   2618 HE1  TYR   183     -36.077  26.781 -34.253  1.00  0.00      1S   
ATOM   2619 CZ   TYR   183     -37.015  26.514 -32.335  1.00  1.00      1S   
ATOM   2620 OH   TYR   183     -35.794  26.212 -31.701  1.00  1.00      1S   
ATOM   2621 HH   TYR   183     -35.954  26.167 -30.748  1.00  0.00      1S   
ATOM   2622 CD2  TYR   183     -39.425  26.827 -32.294  1.00  1.00      1S   
ATOM   2623 HD2  TYR   183     -40.356  26.848 -31.747  1.00  0.00      1S   
ATOM   2624 CE2  TYR   183     -38.227  26.533 -31.629  1.00  1.00      1S   
ATOM   2625 HE2  TYR   183     -38.247  26.316 -30.575  1.00  0.00      1S   
ATOM   2626 C    TYR   183     -39.971  29.757 -34.702  1.00  1.00      1S   
ATOM   2627 O    TYR   183     -39.690  30.461 -33.736  1.00  1.00      1S   
ATOM   2628 N    VAL   184     -39.281  29.824 -35.871  1.00  1.00      1S   
ATOM   2629 HN   VAL   184     -39.532  29.239 -36.641  1.00  0.00      1S   
ATOM   2630 CA   VAL   184     -38.131  30.684 -36.092  1.00  1.00      1S   
ATOM   2631 HA   VAL   184     -37.406  30.454 -35.323  1.00  0.00      1S   
ATOM   2632 CB   VAL   184     -37.476  30.474 -37.459  1.00  1.00      1S   
ATOM   2633 HB   VAL   184     -38.250  30.550 -38.256  1.00  0.00      1S   
ATOM   2634 CG1  VAL   184     -36.387  31.538 -37.727  1.00  1.00      1S   
ATOM   2635 HG11 VAL   184     -35.716  31.617 -36.850  1.00  0.00      1S   
ATOM   2636 HG12 VAL   184     -36.832  32.536 -37.917  1.00  0.00      1S   
ATOM   2637 HG13 VAL   184     -35.780  31.256 -38.612  1.00  0.00      1S   
ATOM   2638 CG2  VAL   184     -36.851  29.065 -37.520  1.00  1.00      1S   
ATOM   2639 HG21 VAL   184     -37.572  28.283 -37.231  1.00  0.00      1S   
ATOM   2640 HG22 VAL   184     -35.981  28.993 -36.839  1.00  0.00      1S   
ATOM   2641 HG23 VAL   184     -36.498  28.851 -38.550  1.00  0.00      1S   
ATOM   2642 C    VAL   184     -38.513  32.137 -35.931  1.00  1.00      1S   
ATOM   2643 O    VAL   184     -37.803  32.885 -35.264  1.00  1.00      1S   
ATOM   2644 N    VAL   185     -39.666  32.560 -36.511  1.00  1.00      1S   
ATOM   2645 HN   VAL   185     -40.234  31.929 -37.036  1.00  0.00      1S   
ATOM   2646 CA   VAL   185     -40.157  33.924 -36.431  1.00  1.00      1S   
ATOM   2647 HA   VAL   185     -39.381  34.565 -36.825  1.00  0.00      1S   
ATOM   2648 CB   VAL   185     -41.427  34.147 -37.253  1.00  1.00      1S   
ATOM   2649 HB   VAL   185     -42.188  33.379 -36.987  1.00  0.00      1S   
ATOM   2650 CG1  VAL   185     -42.031  35.545 -36.982  1.00  1.00      1S   
ATOM   2651 HG11 VAL   185     -41.252  36.331 -37.075  1.00  0.00      1S   
ATOM   2652 HG12 VAL   185     -42.474  35.601 -35.965  1.00  0.00      1S   
ATOM   2653 HG13 VAL   185     -42.838  35.762 -37.713  1.00  0.00      1S   
ATOM   2654 CG2  VAL   185     -41.079  33.990 -38.749  1.00  1.00      1S   
ATOM   2655 HG21 VAL   185     -40.687  32.977 -38.968  1.00  0.00      1S   
ATOM   2656 HG22 VAL   185     -40.315  34.739 -39.047  1.00  0.00      1S   
ATOM   2657 HG23 VAL   185     -41.987  34.153 -39.368  1.00  0.00      1S   
ATOM   2658 C    VAL   185     -40.386  34.329 -34.992  1.00  1.00      1S   
ATOM   2659 O    VAL   185     -39.883  35.360 -34.555  1.00  1.00      1S   
ATOM   2660 N    LEU   186     -41.125  33.510 -34.215  1.00  1.00      1S   
ATOM   2661 HN   LEU   186     -41.484  32.648 -34.569  1.00  0.00      1S   
ATOM   2662 CA   LEU   186     -41.526  33.848 -32.867  1.00  1.00      1S   
ATOM   2663 HA   LEU   186     -41.897  34.863 -32.880  1.00  0.00      1S   
ATOM   2664 CB   LEU   186     -42.651  32.912 -32.385  1.00  1.00      1S   
ATOM   2665 HB1  LEU   186     -42.808  33.013 -31.288  1.00  0.00      1S   
ATOM   2666 HB2  LEU   186     -42.348  31.863 -32.596  1.00  0.00      1S   
ATOM   2667 CG   LEU   186     -43.993  33.203 -33.093  1.00  1.00      1S   
ATOM   2668 HG   LEU   186     -43.783  33.408 -34.169  1.00  0.00      1S   
ATOM   2669 CD1  LEU   186     -44.931  31.987 -33.048  1.00  1.00      1S   
ATOM   2670 HD11 LEU   186     -45.173  31.717 -31.999  1.00  0.00      1S   
ATOM   2671 HD12 LEU   186     -44.443  31.118 -33.538  1.00  0.00      1S   
ATOM   2672 HD13 LEU   186     -45.876  32.210 -33.588  1.00  0.00      1S   
ATOM   2673 CD2  LEU   186     -44.681  34.446 -32.503  1.00  1.00      1S   
ATOM   2674 HD21 LEU   186     -44.033  35.342 -32.591  1.00  0.00      1S   
ATOM   2675 HD22 LEU   186     -44.902  34.271 -31.429  1.00  0.00      1S   
ATOM   2676 HD23 LEU   186     -45.636  34.649 -33.032  1.00  0.00      1S   
ATOM   2677 C    LEU   186     -40.375  33.816 -31.892  1.00  1.00      1S   
ATOM   2678 O    LEU   186     -40.291  34.672 -31.015  1.00  1.00      1S   
ATOM   2679 N    LYS   187     -39.436  32.855 -32.039  1.00  1.00      1S   
ATOM   2680 HN   LYS   187     -39.533  32.141 -32.732  1.00  0.00      1S   
ATOM   2681 CA   LYS   187     -38.236  32.775 -31.232  1.00  1.00      1S   
ATOM   2682 HA   LYS   187     -38.528  32.817 -30.193  1.00  0.00      1S   
ATOM   2683 CB   LYS   187     -37.446  31.481 -31.505  1.00  1.00      1S   
ATOM   2684 HB1  LYS   187     -36.418  31.563 -31.092  1.00  0.00      1S   
ATOM   2685 HB2  LYS   187     -37.359  31.335 -32.604  1.00  0.00      1S   
ATOM   2686 CG   LYS   187     -38.084  30.239 -30.873  1.00  1.00      1S   
ATOM   2687 HG1  LYS   187     -37.600  29.342 -31.322  1.00  0.00      1S   
ATOM   2688 HG2  LYS   187     -39.167  30.201 -31.117  1.00  0.00      1S   
ATOM   2689 CD   LYS   187     -37.890  30.176 -29.351  1.00  1.00      1S   
ATOM   2690 HD1  LYS   187     -38.359  31.053 -28.858  1.00  0.00      1S   
ATOM   2691 HD2  LYS   187     -36.800  30.233 -29.159  1.00  0.00      1S   
ATOM   2692 CE   LYS   187     -38.440  28.879 -28.755  1.00  1.00      1S   
ATOM   2693 HE1  LYS   187     -38.028  28.017 -29.317  1.00  0.00      1S   
ATOM   2694 HE2  LYS   187     -39.547  28.848 -28.806  1.00  0.00      1S   
ATOM   2695 NZ   LYS   187     -38.037  28.709 -27.343  1.00  1.00      1S   
ATOM   2696 HZ1  LYS   187     -38.755  29.100 -26.703  1.00  0.00      1S   
ATOM   2697 HZ2  LYS   187     -37.119  29.172 -27.183  1.00  0.00      1S   
ATOM   2698 HZ3  LYS   187     -37.921  27.683 -27.160  1.00  0.00      1S   
ATOM   2699 C    LYS   187     -37.300  33.928 -31.485  1.00  1.00      1S   
ATOM   2700 O    LYS   187     -36.640  34.400 -30.563  1.00  1.00      1S   
ATOM   2701 N    ASN   188     -37.232  34.429 -32.739  1.00  1.00      1S   
ATOM   2702 HN   ASN   188     -37.744  34.015 -33.490  1.00  0.00      1S   
ATOM   2703 CA   ASN   188     -36.448  35.596 -33.075  1.00  1.00      1S   
ATOM   2704 HA   ASN   188     -35.480  35.492 -32.602  1.00  0.00      1S   
ATOM   2705 CB   ASN   188     -36.304  35.800 -34.605  1.00  1.00      1S   
ATOM   2706 HB1  ASN   188     -36.176  36.874 -34.854  1.00  0.00      1S   
ATOM   2707 HB2  ASN   188     -37.217  35.429 -35.117  1.00  0.00      1S   
ATOM   2708 CG   ASN   188     -35.065  35.061 -35.125  1.00  1.00      1S   
ATOM   2709 OD1  ASN   188     -34.147  34.720 -34.372  1.00  1.00      1S   
ATOM   2710 ND2  ASN   188     -35.021  34.851 -36.473  1.00  1.00      1S   
ATOM   2711 HD21 ASN   188     -34.182  34.494 -36.880  1.00  0.00      1S   
ATOM   2712 HD22 ASN   188     -35.814  35.068 -37.041  1.00  0.00      1S   
ATOM   2713 C    ASN   188     -37.055  36.829 -32.465  1.00  1.00      1S   
ATOM   2714 O    ASN   188     -36.327  37.643 -31.911  1.00  1.00      1S   
ATOM   2715 N    GLU   189     -38.398  36.984 -32.492  1.00  1.00      1S   
ATOM   2716 HN   GLU   189     -38.987  36.332 -32.966  1.00  0.00      1S   
ATOM   2717 CA   GLU   189     -39.077  38.083 -31.832  1.00  1.00      1S   
ATOM   2718 HA   GLU   189     -38.680  39.005 -32.233  1.00  0.00      1S   
ATOM   2719 CB   GLU   189     -40.600  38.057 -32.070  1.00  1.00      1S   
ATOM   2720 HB1  GLU   189     -41.084  38.814 -31.410  1.00  0.00      1S   
ATOM   2721 HB2  GLU   189     -41.002  37.057 -31.795  1.00  0.00      1S   
ATOM   2722 CG   GLU   189     -40.982  38.379 -33.528  1.00  1.00      1S   
ATOM   2723 HG1  GLU   189     -40.550  37.624 -34.214  1.00  0.00      1S   
ATOM   2724 HG2  GLU   189     -40.580  39.375 -33.809  1.00  0.00      1S   
ATOM   2725 CD   GLU   189     -42.498  38.397 -33.701  1.00  1.00      1S   
ATOM   2726 OE1  GLU   189     -42.971  38.269 -34.860  1.00  1.00      1S   
ATOM   2727 OE2  GLU   189     -43.210  38.560 -32.677  1.00  1.00      1S   
ATOM   2728 C    GLU   189     -38.830  38.086 -30.339  1.00  1.00      1S   
ATOM   2729 O    GLU   189     -38.590  39.139 -29.753  1.00  1.00      1S   
ATOM   2730 N    MET   190     -38.837  36.890 -29.706  1.00  1.00      1S   
ATOM   2731 HN   MET   190     -39.062  36.058 -30.211  1.00  0.00      1S   
ATOM   2732 CA   MET   190     -38.550  36.692 -28.302  1.00  1.00      1S   
ATOM   2733 HA   MET   190     -39.240  37.301 -27.734  1.00  0.00      1S   
ATOM   2734 CB   MET   190     -38.748  35.203 -27.919  1.00  1.00      1S   
ATOM   2735 HB1  MET   190     -38.147  34.556 -28.591  1.00  0.00      1S   
ATOM   2736 HB2  MET   190     -39.813  34.953 -28.110  1.00  0.00      1S   
ATOM   2737 CG   MET   190     -38.438  34.822 -26.459  1.00  1.00      1S   
ATOM   2738 HG1  MET   190     -39.059  33.930 -26.222  1.00  0.00      1S   
ATOM   2739 HG2  MET   190     -38.785  35.645 -25.797  1.00  0.00      1S   
ATOM   2740 SD   MET   190     -36.683  34.427 -26.135  1.00  1.00      1S   
ATOM   2741 CE   MET   190     -36.905  33.088 -24.933  1.00  1.00      1S   
ATOM   2742 HE1  MET   190     -36.653  32.105 -25.382  1.00  0.00      1S   
ATOM   2743 HE2  MET   190     -37.951  33.037 -24.567  1.00  0.00      1S   
ATOM   2744 HE3  MET   190     -36.242  33.241 -24.056  1.00  0.00      1S   
ATOM   2745 C    MET   190     -37.148  37.136 -27.969  1.00  1.00      1S   
ATOM   2746 O    MET   190     -36.931  37.861 -27.000  1.00  1.00      1S   
ATOM   2747 N    ALA   191     -36.160  36.718 -28.789  1.00  1.00      1S   
ATOM   2748 HN   ALA   191     -36.362  36.150 -29.585  1.00  0.00      1S   
ATOM   2749 CA   ALA   191     -34.762  36.970 -28.548  1.00  1.00      1S   
ATOM   2750 HA   ALA   191     -34.549  36.694 -27.524  1.00  0.00      1S   
ATOM   2751 CB   ALA   191     -33.882  36.122 -29.475  1.00  1.00      1S   
ATOM   2752 HB1  ALA   191     -34.087  36.349 -30.542  1.00  0.00      1S   
ATOM   2753 HB2  ALA   191     -34.093  35.045 -29.303  1.00  0.00      1S   
ATOM   2754 HB3  ALA   191     -32.806  36.301 -29.268  1.00  0.00      1S   
ATOM   2755 C    ALA   191     -34.411  38.425 -28.725  1.00  1.00      1S   
ATOM   2756 O    ALA   191     -33.699  38.988 -27.898  1.00  1.00      1S   
ATOM   2757 N    ARG   192     -34.933  39.082 -29.788  1.00  1.00      1S   
ATOM   2758 HN   ARG   192     -35.506  38.604 -30.454  1.00  0.00      1S   
ATOM   2759 CA   ARG   192     -34.689  40.482 -30.068  1.00  1.00      1S   
ATOM   2760 HA   ARG   192     -33.631  40.644 -30.021  1.00  0.00      1S   
ATOM   2761 CB   ARG   192     -35.179  40.923 -31.461  1.00  1.00      1S   
ATOM   2762 HB1  ARG   192     -34.989  42.012 -31.594  1.00  0.00      1S   
ATOM   2763 HB2  ARG   192     -36.277  40.752 -31.531  1.00  0.00      1S   
ATOM   2764 CG   ARG   192     -34.493  40.187 -32.625  1.00  1.00      1S   
ATOM   2765 HG1  ARG   192     -34.630  39.096 -32.491  1.00  0.00      1S   
ATOM   2766 HG2  ARG   192     -33.397  40.375 -32.602  1.00  0.00      1S   
ATOM   2767 CD   ARG   192     -35.073  40.629 -33.978  1.00  1.00      1S   
ATOM   2768 HD1  ARG   192     -34.561  41.541 -34.355  1.00  0.00      1S   
ATOM   2769 HD2  ARG   192     -36.155  40.856 -33.860  1.00  0.00      1S   
ATOM   2770 NE   ARG   192     -34.977  39.513 -34.980  1.00  1.00      1S   
ATOM   2771 HE   ARG   192     -35.771  38.923 -35.104  1.00  0.00      1S   
ATOM   2772 CZ   ARG   192     -33.870  39.270 -35.737  1.00  1.00      1S   
ATOM   2773 NH1  ARG   192     -33.861  38.225 -36.607  1.00  1.00      1S   
ATOM   2774 HH11 ARG   192     -34.681  37.668 -36.729  1.00  0.00      1S   
ATOM   2775 HH12 ARG   192     -33.032  38.016 -37.120  1.00  0.00      1S   
ATOM   2776 NH2  ARG   192     -32.772  40.055 -35.641  1.00  1.00      1S   
ATOM   2777 HH21 ARG   192     -32.722  40.723 -34.900  1.00  0.00      1S   
ATOM   2778 HH22 ARG   192     -31.925  39.769 -36.085  1.00  0.00      1S   
ATOM   2779 C    ARG   192     -35.311  41.390 -29.043  1.00  1.00      1S   
ATOM   2780 O    ARG   192     -34.740  42.424 -28.705  1.00  1.00      1S   
ATOM   2781 N    ALA   193     -36.482  41.004 -28.489  1.00  1.00      1S   
ATOM   2782 HN   ALA   193     -36.956  40.181 -28.798  1.00  0.00      1S   
ATOM   2783 CA   ALA   193     -37.135  41.733 -27.426  1.00  1.00      1S   
ATOM   2784 HA   ALA   193     -37.215  42.767 -27.732  1.00  0.00      1S   
ATOM   2785 CB   ALA   193     -38.549  41.187 -27.180  1.00  1.00      1S   
ATOM   2786 HB1  ALA   193     -38.505  40.109 -26.921  1.00  0.00      1S   
ATOM   2787 HB2  ALA   193     -39.163  41.291 -28.100  1.00  0.00      1S   
ATOM   2788 HB3  ALA   193     -39.056  41.743 -26.363  1.00  0.00      1S   
ATOM   2789 C    ALA   193     -36.336  41.683 -26.135  1.00  1.00      1S   
ATOM   2790 O    ALA   193     -36.375  42.626 -25.347  1.00  1.00      1S   
ATOM   2791 N    ASN   194     -35.550  40.598 -25.920  1.00  1.00      1S   
ATOM   2792 HN   ASN   194     -35.562  39.831 -26.558  1.00  0.00      1S   
ATOM   2793 CA   ASN   194     -34.608  40.481 -24.822  1.00  1.00      1S   
ATOM   2794 HA   ASN   194     -34.953  41.087 -23.995  1.00  0.00      1S   
ATOM   2795 CB   ASN   194     -34.438  39.010 -24.366  1.00  1.00      1S   
ATOM   2796 HB1  ASN   194     -33.542  38.884 -23.719  1.00  0.00      1S   
ATOM   2797 HB2  ASN   194     -34.333  38.342 -25.246  1.00  0.00      1S   
ATOM   2798 CG   ASN   194     -35.639  38.618 -23.509  1.00  1.00      1S   
ATOM   2799 OD1  ASN   194     -35.860  39.232 -22.462  1.00  1.00      1S   
ATOM   2800 ND2  ASN   194     -36.410  37.586 -23.950  1.00  1.00      1S   
ATOM   2801 HD21 ASN   194     -37.212  37.314 -23.422  1.00  0.00      1S   
ATOM   2802 HD22 ASN   194     -36.246  37.194 -24.855  1.00  0.00      1S   
ATOM   2803 C    ASN   194     -33.236  41.004 -25.195  1.00  1.00      1S   
ATOM   2804 O    ASN   194     -32.271  40.765 -24.471  1.00  1.00      1S   
ATOM   2805 N    HSD   195     -33.120  41.761 -26.310  1.00  1.00      1S   
ATOM   2806 HN   HSD   195     -33.913  41.913 -26.898  1.00  0.00      1S   
ATOM   2807 CA   HSD   195     -31.934  42.497 -26.699  1.00  1.00      1S   
ATOM   2808 HA   HSD   195     -32.230  43.051 -27.578  1.00  0.00      1S   
ATOM   2809 CB   HSD   195     -31.462  43.532 -25.650  1.00  1.00      1S   
ATOM   2810 HB1  HSD   195     -30.698  44.203 -26.099  1.00  0.00      1S   
ATOM   2811 HB2  HSD   195     -30.993  43.009 -24.788  1.00  0.00      1S   
ATOM   2812 ND1  HSD   195     -33.159  44.232 -23.888  1.00  1.00      1S   
ATOM   2813 HD1  HSD   195     -32.883  43.564 -23.194  1.00  0.00      1S   
ATOM   2814 CG   HSD   195     -32.592  44.378 -25.137  1.00  1.00      1S   
ATOM   2815 CE1  HSD   195     -34.156  45.146 -23.802  1.00  1.00      1S   
ATOM   2816 HE1  HSD   195     -34.778  45.259 -22.915  1.00  0.00      1S   
ATOM   2817 NE2  HSD   195     -34.272  45.863 -24.903  1.00  1.00      1S   
ATOM   2818 CD2  HSD   195     -33.288  45.376 -25.745  1.00  1.00      1S   
ATOM   2819 HD2  HSD   195     -33.174  45.791 -26.738  1.00  0.00      1S   
ATOM   2820 C    HSD   195     -30.782  41.618 -27.114  1.00  1.00      1S   
ATOM   2821 O    HSD   195     -29.618  41.987 -26.967  1.00  1.00      1S   
ATOM   2822 N    TYR   196     -31.096  40.438 -27.688  1.00  1.00      1S   
ATOM   2823 HN   TYR   196     -32.045  40.131 -27.744  1.00  0.00      1S   
ATOM   2824 CA   TYR   196     -30.140  39.604 -28.375  1.00  1.00      1S   
ATOM   2825 HA   TYR   196     -29.128  39.891 -28.121  1.00  0.00      1S   
ATOM   2826 CB   TYR   196     -30.346  38.092 -28.115  1.00  1.00      1S   
ATOM   2827 HB1  TYR   196     -29.689  37.482 -28.771  1.00  0.00      1S   
ATOM   2828 HB2  TYR   196     -31.402  37.799 -28.295  1.00  0.00      1S   
ATOM   2829 CG   TYR   196     -29.999  37.784 -26.685  1.00  1.00      1S   
ATOM   2830 CD1  TYR   196     -30.945  37.935 -25.657  1.00  1.00      1S   
ATOM   2831 HD1  TYR   196     -31.942  38.271 -25.896  1.00  0.00      1S   
ATOM   2832 CE1  TYR   196     -30.604  37.666 -24.325  1.00  1.00      1S   
ATOM   2833 HE1  TYR   196     -31.338  37.799 -23.545  1.00  0.00      1S   
ATOM   2834 CZ   TYR   196     -29.311  37.230 -24.010  1.00  1.00      1S   
ATOM   2835 OH   TYR   196     -28.956  36.964 -22.671  1.00  1.00      1S   
ATOM   2836 HH   TYR   196     -28.019  36.754 -22.650  1.00  0.00      1S   
ATOM   2837 CD2  TYR   196     -28.706  37.349 -26.355  1.00  1.00      1S   
ATOM   2838 HD2  TYR   196     -27.974  37.217 -27.137  1.00  0.00      1S   
ATOM   2839 CE2  TYR   196     -28.366  37.064 -25.027  1.00  1.00      1S   
ATOM   2840 HE2  TYR   196     -27.372  36.720 -24.790  1.00  0.00      1S   
ATOM   2841 C    TYR   196     -30.367  39.897 -29.828  1.00  1.00      1S   
ATOM   2842 O    TYR   196     -31.394  40.453 -30.203  1.00  1.00      1S   
ATOM   2843 N    GLU   197     -29.405  39.562 -30.709  1.00  1.00      1S   
ATOM   2844 HN   GLU   197     -28.551  39.121 -30.432  1.00  0.00      1S   
ATOM   2845 CA   GLU   197     -29.559  39.880 -32.112  1.00  1.00      1S   
ATOM   2846 HA   GLU   197     -30.103  40.812 -32.193  1.00  0.00      1S   
ATOM   2847 CB   GLU   197     -28.224  40.130 -32.853  1.00  1.00      1S   
ATOM   2848 HB1  GLU   197     -27.751  41.002 -32.348  1.00  0.00      1S   
ATOM   2849 HB2  GLU   197     -28.421  40.422 -33.907  1.00  0.00      1S   
ATOM   2850 CG   GLU   197     -27.265  38.932 -32.829  1.00  1.00      1S   
ATOM   2851 HG1  GLU   197     -27.560  38.177 -33.587  1.00  0.00      1S   
ATOM   2852 HG2  GLU   197     -27.345  38.471 -31.833  1.00  0.00      1S   
ATOM   2853 CD   GLU   197     -25.799  39.324 -33.018  1.00  1.00      1S   
ATOM   2854 OE1  GLU   197     -25.409  40.437 -32.575  1.00  1.00      1S   
ATOM   2855 OE2  GLU   197     -25.041  38.486 -33.576  1.00  1.00      1S   
ATOM   2856 C    GLU   197     -30.390  38.835 -32.803  1.00  1.00      1S   
ATOM   2857 O    GLU   197     -31.014  39.151 -33.802  1.00  1.00      1S   
ATOM   2858 N    ASP   198     -30.462  37.592 -32.278  1.00  1.00      1S   
ATOM   2859 HN   ASP   198     -29.946  37.332 -31.466  1.00  0.00      1S   
ATOM   2860 CA   ASP   198     -31.365  36.589 -32.792  1.00  1.00      1S   
ATOM   2861 HA   ASP   198     -32.360  37.017 -32.805  1.00  0.00      1S   
ATOM   2862 CB   ASP   198     -31.016  36.074 -34.220  1.00  1.00      1S   
ATOM   2863 HB1  ASP   198     -31.181  36.904 -34.941  1.00  0.00      1S   
ATOM   2864 HB2  ASP   198     -31.691  35.250 -34.520  1.00  0.00      1S   
ATOM   2865 CG   ASP   198     -29.564  35.611 -34.348  1.00  1.00      1S   
ATOM   2866 OD1  ASP   198     -29.230  34.538 -33.786  1.00  1.00      1S   
ATOM   2867 OD2  ASP   198     -28.771  36.320 -35.020  1.00  1.00      1S   
ATOM   2868 C    ASP   198     -31.380  35.474 -31.781  1.00  1.00      1S   
ATOM   2869 O    ASP   198     -30.770  35.585 -30.720  1.00  1.00      1S   
ATOM   2870 N    TYR   199     -32.096  34.365 -32.081  1.00  1.00      1S   
ATOM   2871 HN   TYR   199     -32.595  34.293 -32.943  1.00  0.00      1S   
ATOM   2872 CA   TYR   199     -32.273  33.263 -31.161  1.00  1.00      1S   
ATOM   2873 HA   TYR   199     -32.460  33.697 -30.191  1.00  0.00      1S   
ATOM   2874 CB   TYR   199     -33.489  32.393 -31.567  1.00  1.00      1S   
ATOM   2875 HB1  TYR   199     -33.285  31.887 -32.536  1.00  0.00      1S   
ATOM   2876 HB2  TYR   199     -34.380  33.044 -31.697  1.00  0.00      1S   
ATOM   2877 CG   TYR   199     -33.842  31.358 -30.524  1.00  1.00      1S   
ATOM   2878 CD1  TYR   199     -33.953  31.681 -29.157  1.00  1.00      1S   
ATOM   2879 HD1  TYR   199     -33.801  32.694 -28.818  1.00  0.00      1S   
ATOM   2880 CE1  TYR   199     -34.259  30.693 -28.214  1.00  1.00      1S   
ATOM   2881 HE1  TYR   199     -34.341  30.956 -27.169  1.00  0.00      1S   
ATOM   2882 CZ   TYR   199     -34.487  29.376 -28.629  1.00  1.00      1S   
ATOM   2883 OH   TYR   199     -34.867  28.397 -27.687  1.00  1.00      1S   
ATOM   2884 HH   TYR   199     -35.092  27.590 -28.167  1.00  0.00      1S   
ATOM   2885 CD2  TYR   199     -34.077  30.035 -30.923  1.00  1.00      1S   
ATOM   2886 HD2  TYR   199     -34.019  29.779 -31.967  1.00  0.00      1S   
ATOM   2887 CE2  TYR   199     -34.402  29.050 -29.988  1.00  1.00      1S   
ATOM   2888 HE2  TYR   199     -34.591  28.043 -30.322  1.00  0.00      1S   
ATOM   2889 C    TYR   199     -31.028  32.406 -31.051  1.00  1.00      1S   
ATOM   2890 O    TYR   199     -30.789  31.770 -30.026  1.00  1.00      1S   
ATOM   2891 N    GLY   200     -30.171  32.392 -32.092  1.00  1.00      1S   
ATOM   2892 HN   GLY   200     -30.355  32.914 -32.924  1.00  0.00      1S   
ATOM   2893 CA   GLY   200     -28.890  31.724 -32.042  1.00  1.00      1S   
ATOM   2894 HA1  GLY   200     -28.474  31.757 -33.038  1.00  0.00      1S   
ATOM   2895 HA2  GLY   200     -29.040  30.719 -31.670  1.00  0.00      1S   
ATOM   2896 C    GLY   200     -27.960  32.448 -31.113  1.00  1.00      1S   
ATOM   2897 O    GLY   200     -27.259  31.821 -30.327  1.00  1.00      1S   
ATOM   2898 N    ASP   201     -27.962  33.800 -31.161  1.00  1.00      1S   
ATOM   2899 HN   ASP   201     -28.507  34.276 -31.852  1.00  0.00      1S   
ATOM   2900 CA   ASP   201     -27.218  34.657 -30.262  1.00  1.00      1S   
ATOM   2901 HA   ASP   201     -26.183  34.352 -30.305  1.00  0.00      1S   
ATOM   2902 CB   ASP   201     -27.337  36.131 -30.704  1.00  1.00      1S   
ATOM   2903 HB1  ASP   201     -28.393  36.467 -30.657  1.00  0.00      1S   
ATOM   2904 HB2  ASP   201     -27.007  36.205 -31.763  1.00  0.00      1S   
ATOM   2905 CG   ASP   201     -26.465  37.074 -29.875  1.00  1.00      1S   
ATOM   2906 OD1  ASP   201     -25.270  36.743 -29.661  1.00  1.00      1S   
ATOM   2907 OD2  ASP   201     -26.986  38.138 -29.446  1.00  1.00      1S   
ATOM   2908 C    ASP   201     -27.685  34.493 -28.836  1.00  1.00      1S   
ATOM   2909 O    ASP   201     -26.866  34.442 -27.924  1.00  1.00      1S   
ATOM   2910 N    TYR   202     -29.013  34.348 -28.622  1.00  1.00      1S   
ATOM   2911 HN   TYR   202     -29.653  34.440 -29.384  1.00  0.00      1S   
ATOM   2912 CA   TYR   202     -29.619  34.026 -27.345  1.00  1.00      1S   
ATOM   2913 HA   TYR   202     -29.390  34.832 -26.666  1.00  0.00      1S   
ATOM   2914 CB   TYR   202     -31.165  33.922 -27.497  1.00  1.00      1S   
ATOM   2915 HB1  TYR   202     -31.426  33.150 -28.242  1.00  0.00      1S   
ATOM   2916 HB2  TYR   202     -31.554  34.895 -27.867  1.00  0.00      1S   
ATOM   2917 CG   TYR   202     -31.899  33.573 -26.229  1.00  1.00      1S   
ATOM   2918 CD1  TYR   202     -31.981  32.234 -25.804  1.00  1.00      1S   
ATOM   2919 HD1  TYR   202     -31.517  31.455 -26.392  1.00  0.00      1S   
ATOM   2920 CE1  TYR   202     -32.643  31.898 -24.620  1.00  1.00      1S   
ATOM   2921 HE1  TYR   202     -32.674  30.866 -24.301  1.00  0.00      1S   
ATOM   2922 CZ   TYR   202     -33.261  32.899 -23.860  1.00  1.00      1S   
ATOM   2923 OH   TYR   202     -33.919  32.568 -22.657  1.00  1.00      1S   
ATOM   2924 HH   TYR   202     -33.739  31.644 -22.470  1.00  0.00      1S   
ATOM   2925 CD2  TYR   202     -32.540  34.565 -25.471  1.00  1.00      1S   
ATOM   2926 HD2  TYR   202     -32.510  35.593 -25.799  1.00  0.00      1S   
ATOM   2927 CE2  TYR   202     -33.222  34.232 -24.294  1.00  1.00      1S   
ATOM   2928 HE2  TYR   202     -33.708  35.006 -23.719  1.00  0.00      1S   
ATOM   2929 C    TYR   202     -29.015  32.759 -26.767  1.00  1.00      1S   
ATOM   2930 O    TYR   202     -28.627  32.733 -25.601  1.00  1.00      1S   
ATOM   2931 N    TRP   203     -28.892  31.692 -27.590  1.00  1.00      1S   
ATOM   2932 HN   TRP   203     -29.230  31.731 -28.530  1.00  0.00      1S   
ATOM   2933 CA   TRP   203     -28.304  30.431 -27.191  1.00  1.00      1S   
ATOM   2934 HA   TRP   203     -28.768  30.144 -26.260  1.00  0.00      1S   
ATOM   2935 CB   TRP   203     -28.513  29.331 -28.256  1.00  1.00      1S   
ATOM   2936 HB1  TRP   203     -27.755  28.525 -28.147  1.00  0.00      1S   
ATOM   2937 HB2  TRP   203     -28.395  29.762 -29.274  1.00  0.00      1S   
ATOM   2938 CG   TRP   203     -29.856  28.649 -28.147  1.00  1.00      1S   
ATOM   2939 CD1  TRP   203     -30.722  28.624 -27.086  1.00  1.00      1S   
ATOM   2940 HD1  TRP   203     -30.591  29.144 -26.149  1.00  0.00      1S   
ATOM   2941 NE1  TRP   203     -31.793  27.820 -27.364  1.00  1.00      1S   
ATOM   2942 HE1  TRP   203     -32.571  27.684 -26.787  1.00  0.00      1S   
ATOM   2943 CE2  TRP   203     -31.640  27.301 -28.624  1.00  1.00      1S   
ATOM   2944 CD2  TRP   203     -30.429  27.798 -29.155  1.00  1.00      1S   
ATOM   2945 CE3  TRP   203     -29.990  27.430 -30.422  1.00  1.00      1S   
ATOM   2946 HE3  TRP   203     -29.062  27.785 -30.841  1.00  0.00      1S   
ATOM   2947 CZ3  TRP   203     -30.807  26.564 -31.164  1.00  1.00      1S   
ATOM   2948 HZ3  TRP   203     -30.497  26.262 -32.152  1.00  0.00      1S   
ATOM   2949 CZ2  TRP   203     -32.442  26.441 -29.361  1.00  1.00      1S   
ATOM   2950 HZ2  TRP   203     -33.374  26.062 -28.970  1.00  0.00      1S   
ATOM   2951 CH2  TRP   203     -32.024  26.095 -30.648  1.00  1.00      1S   
ATOM   2952 HH2  TRP   203     -32.655  25.461 -31.250  1.00  0.00      1S   
ATOM   2953 C    TRP   203     -26.841  30.527 -26.869  1.00  1.00      1S   
ATOM   2954 O    TRP   203     -26.389  29.926 -25.896  1.00  1.00      1S   
ATOM   2955 N    ARG   204     -26.066  31.320 -27.641  1.00  1.00      1S   
ATOM   2956 HN   ARG   204     -26.440  31.787 -28.441  1.00  0.00      1S   
ATOM   2957 CA   ARG   204     -24.659  31.542 -27.376  1.00  1.00      1S   
ATOM   2958 HA   ARG   204     -24.193  30.573 -27.262  1.00  0.00      1S   
ATOM   2959 CB   ARG   204     -23.965  32.274 -28.541  1.00  1.00      1S   
ATOM   2960 HB1  ARG   204     -22.910  32.498 -28.262  1.00  0.00      1S   
ATOM   2961 HB2  ARG   204     -24.482  33.238 -28.743  1.00  0.00      1S   
ATOM   2962 CG   ARG   204     -23.933  31.426 -29.821  1.00  1.00      1S   
ATOM   2963 HG1  ARG   204     -24.960  31.261 -30.202  1.00  0.00      1S   
ATOM   2964 HG2  ARG   204     -23.527  30.425 -29.559  1.00  0.00      1S   
ATOM   2965 CD   ARG   204     -23.058  32.016 -30.931  1.00  1.00      1S   
ATOM   2966 HD1  ARG   204     -22.942  31.295 -31.768  1.00  0.00      1S   
ATOM   2967 HD2  ARG   204     -22.048  32.249 -30.532  1.00  0.00      1S   
ATOM   2968 NE   ARG   204     -23.660  33.295 -31.447  1.00  1.00      1S   
ATOM   2969 HE   ARG   204     -23.313  34.163 -31.101  1.00  0.00      1S   
ATOM   2970 CZ   ARG   204     -24.625  33.320 -32.413  1.00  1.00      1S   
ATOM   2971 NH1  ARG   204     -25.148  32.171 -32.915  1.00  1.00      1S   
ATOM   2972 HH11 ARG   204     -24.850  31.291 -32.541  1.00  0.00      1S   
ATOM   2973 HH12 ARG   204     -25.874  32.206 -33.592  1.00  0.00      1S   
ATOM   2974 NH2  ARG   204     -25.071  34.511 -32.894  1.00  1.00      1S   
ATOM   2975 HH21 ARG   204     -24.731  35.367 -32.506  1.00  0.00      1S   
ATOM   2976 HH22 ARG   204     -25.835  34.529 -33.538  1.00  0.00      1S   
ATOM   2977 C    ARG   204     -24.418  32.317 -26.095  1.00  1.00      1S   
ATOM   2978 O    ARG   204     -23.289  32.378 -25.611  1.00  1.00      1S   
ATOM   2979 N    GLY   205     -25.494  32.878 -25.490  1.00  1.00      1S   
ATOM   2980 HN   GLY   205     -26.389  32.828 -25.930  1.00  0.00      1S   
ATOM   2981 CA   GLY   205     -25.493  33.550 -24.210  1.00  1.00      1S   
ATOM   2982 HA1  GLY   205     -26.509  33.870 -24.030  1.00  0.00      1S   
ATOM   2983 HA2  GLY   205     -24.796  34.370 -24.270  1.00  0.00      1S   
ATOM   2984 C    GLY   205     -25.067  32.703 -23.048  1.00  1.00      1S   
ATOM   2985 O    GLY   205     -24.631  33.245 -22.035  1.00  1.00      1S   
ATOM   2986 N    ASP   206     -25.146  31.353 -23.162  1.00  1.00      1S   
ATOM   2987 HN   ASP   206     -25.521  30.927 -23.984  1.00  0.00      1S   
ATOM   2988 CA   ASP   206     -24.721  30.434 -22.124  1.00  1.00      1S   
ATOM   2989 HA   ASP   206     -25.275  30.696 -21.232  1.00  0.00      1S   
ATOM   2990 CB   ASP   206     -25.043  28.963 -22.511  1.00  1.00      1S   
ATOM   2991 HB1  ASP   206     -24.365  28.617 -23.319  1.00  0.00      1S   
ATOM   2992 HB2  ASP   206     -26.085  28.897 -22.889  1.00  0.00      1S   
ATOM   2993 CG   ASP   206     -24.921  28.037 -21.298  1.00  1.00      1S   
ATOM   2994 OD1  ASP   206     -25.804  28.103 -20.402  1.00  1.00      1S   
ATOM   2995 OD2  ASP   206     -23.929  27.266 -21.248  1.00  1.00      1S   
ATOM   2996 C    ASP   206     -23.234  30.568 -21.819  1.00  1.00      1S   
ATOM   2997 O    ASP   206     -22.798  30.323 -20.695  1.00  1.00      1S   
ATOM   2998 N    TYR   207     -22.425  30.984 -22.820  1.00  1.00      1S   
ATOM   2999 HN   TYR   207     -22.798  31.221 -23.715  1.00  0.00      1S   
ATOM   3000 CA   TYR   207     -20.987  31.059 -22.702  1.00  1.00      1S   
ATOM   3001 HA   TYR   207     -20.660  30.415 -21.897  1.00  0.00      1S   
ATOM   3002 CB   TYR   207     -20.277  30.614 -24.006  1.00  1.00      1S   
ATOM   3003 HB1  TYR   207     -19.173  30.692 -23.901  1.00  0.00      1S   
ATOM   3004 HB2  TYR   207     -20.601  31.238 -24.867  1.00  0.00      1S   
ATOM   3005 CG   TYR   207     -20.617  29.176 -24.303  1.00  1.00      1S   
ATOM   3006 CD1  TYR   207     -21.786  28.847 -25.014  1.00  1.00      1S   
ATOM   3007 HD1  TYR   207     -22.444  29.631 -25.357  1.00  0.00      1S   
ATOM   3008 CE1  TYR   207     -22.115  27.514 -25.273  1.00  1.00      1S   
ATOM   3009 HE1  TYR   207     -23.021  27.281 -25.815  1.00  0.00      1S   
ATOM   3010 CZ   TYR   207     -21.271  26.491 -24.831  1.00  1.00      1S   
ATOM   3011 OH   TYR   207     -21.608  25.149 -25.080  1.00  1.00      1S   
ATOM   3012 HH   TYR   207     -22.549  25.120 -25.298  1.00  0.00      1S   
ATOM   3013 CD2  TYR   207     -19.776  28.137 -23.865  1.00  1.00      1S   
ATOM   3014 HD2  TYR   207     -18.874  28.370 -23.318  1.00  0.00      1S   
ATOM   3015 CE2  TYR   207     -20.100  26.801 -24.130  1.00  1.00      1S   
ATOM   3016 HE2  TYR   207     -19.456  26.008 -23.784  1.00  0.00      1S   
ATOM   3017 C    TYR   207     -20.538  32.464 -22.371  1.00  1.00      1S   
ATOM   3018 O    TYR   207     -19.349  32.705 -22.189  1.00  1.00      1S   
ATOM   3019 N    GLU   208     -21.465  33.442 -22.266  1.00  1.00      1S   
ATOM   3020 HN   GLU   208     -22.439  33.256 -22.383  1.00  0.00      1S   
ATOM   3021 CA   GLU   208     -21.106  34.823 -22.036  1.00  1.00      1S   
ATOM   3022 HA   GLU   208     -20.316  35.070 -22.731  1.00  0.00      1S   
ATOM   3023 CB   GLU   208     -22.295  35.765 -22.311  1.00  1.00      1S   
ATOM   3024 HB1  GLU   208     -23.073  35.629 -21.526  1.00  0.00      1S   
ATOM   3025 HB2  GLU   208     -22.748  35.459 -23.280  1.00  0.00      1S   
ATOM   3026 CG   GLU   208     -21.898  37.248 -22.407  1.00  1.00      1S   
ATOM   3027 HG1  GLU   208     -21.083  37.365 -23.154  1.00  0.00      1S   
ATOM   3028 HG2  GLU   208     -21.526  37.605 -21.424  1.00  0.00      1S   
ATOM   3029 CD   GLU   208     -23.083  38.110 -22.833  1.00  1.00      1S   
ATOM   3030 OE1  GLU   208     -24.225  37.583 -22.904  1.00  1.00      1S   
ATOM   3031 OE2  GLU   208     -22.855  39.319 -23.102  1.00  1.00      1S   
ATOM   3032 C    GLU   208     -20.620  35.065 -20.621  1.00  1.00      1S   
ATOM   3033 O    GLU   208     -21.205  34.572 -19.659  1.00  1.00      1S   
ATOM   3034 N    VAL   209     -19.516  35.837 -20.482  1.00  1.00      1S   
ATOM   3035 HN   VAL   209     -19.041  36.190 -21.288  1.00  0.00      1S   
ATOM   3036 CA   VAL   209     -18.981  36.283 -19.217  1.00  1.00      1S   
ATOM   3037 HA   VAL   209     -19.731  36.177 -18.445  1.00  0.00      1S   
ATOM   3038 CB   VAL   209     -17.705  35.552 -18.806  1.00  1.00      1S   
ATOM   3039 HB   VAL   209     -16.953  35.626 -19.624  1.00  0.00      1S   
ATOM   3040 CG1  VAL   209     -17.100  36.185 -17.532  1.00  1.00      1S   
ATOM   3041 HG11 VAL   209     -17.819  36.129 -16.689  1.00  0.00      1S   
ATOM   3042 HG12 VAL   209     -16.818  37.246 -17.692  1.00  0.00      1S   
ATOM   3043 HG13 VAL   209     -16.171  35.653 -17.248  1.00  0.00      1S   
ATOM   3044 CG2  VAL   209     -18.026  34.054 -18.602  1.00  1.00      1S   
ATOM   3045 HG21 VAL   209     -18.420  33.598 -19.535  1.00  0.00      1S   
ATOM   3046 HG22 VAL   209     -18.782  33.929 -17.799  1.00  0.00      1S   
ATOM   3047 HG23 VAL   209     -17.108  33.498 -18.320  1.00  0.00      1S   
ATOM   3048 C    VAL   209     -18.694  37.752 -19.405  1.00  1.00      1S   
ATOM   3049 O    VAL   209     -18.077  38.148 -20.392  1.00  1.00      1S   
ATOM   3050 N    ASN   210     -19.151  38.595 -18.450  1.00  1.00      1S   
ATOM   3051 HN   ASN   210     -19.652  38.256 -17.657  1.00  0.00      1S   
ATOM   3052 CA   ASN   210     -18.917  40.020 -18.468  1.00  1.00      1S   
ATOM   3053 HA   ASN   210     -18.152  40.268 -19.193  1.00  0.00      1S   
ATOM   3054 CB   ASN   210     -20.207  40.837 -18.723  1.00  1.00      1S   
ATOM   3055 HB1  ASN   210     -20.039  41.916 -18.512  1.00  0.00      1S   
ATOM   3056 HB2  ASN   210     -21.022  40.472 -18.063  1.00  0.00      1S   
ATOM   3057 CG   ASN   210     -20.607  40.719 -20.195  1.00  1.00      1S   
ATOM   3058 OD1  ASN   210     -19.892  41.204 -21.079  1.00  1.00      1S   
ATOM   3059 ND2  ASN   210     -21.780  40.075 -20.453  1.00  1.00      1S   
ATOM   3060 HD21 ASN   210     -22.082  39.962 -21.403  1.00  0.00      1S   
ATOM   3061 HD22 ASN   210     -22.312  39.679 -19.706  1.00  0.00      1S   
ATOM   3062 C    ASN   210     -18.414  40.433 -17.115  1.00  1.00      1S   
ATOM   3063 O    ASN   210     -18.801  39.871 -16.091  1.00  1.00      1S   
ATOM   3064 N    GLY   211     -17.545  41.472 -17.102  1.00  1.00      1S   
ATOM   3065 HN   GLY   211     -17.184  41.833 -17.959  1.00  0.00      1S   
ATOM   3066 CA   GLY   211     -17.146  42.198 -15.919  1.00  1.00      1S   
ATOM   3067 HA1  GLY   211     -18.042  42.469 -15.380  1.00  0.00      1S   
ATOM   3068 HA2  GLY   211     -16.588  43.056 -16.264  1.00  0.00      1S   
ATOM   3069 C    GLY   211     -16.253  41.433 -14.986  1.00  1.00      1S   
ATOM   3070 O    GLY   211     -16.290  41.666 -13.780  1.00  1.00      1S   
ATOM   3071 N    VAL   212     -15.420  40.511 -15.519  1.00  1.00      1S   
ATOM   3072 HN   VAL   212     -15.430  40.302 -16.499  1.00  0.00      1S   
ATOM   3073 CA   VAL   212     -14.416  39.823 -14.743  1.00  1.00      1S   
ATOM   3074 HA   VAL   212     -14.225  40.365 -13.827  1.00  0.00      1S   
ATOM   3075 CB   VAL   212     -14.746  38.365 -14.417  1.00  1.00      1S   
ATOM   3076 HB   VAL   212     -14.723  37.741 -15.339  1.00  0.00      1S   
ATOM   3077 CG1  VAL   212     -13.709  37.819 -13.413  1.00  1.00      1S   
ATOM   3078 HG11 VAL   212     -13.724  38.420 -12.479  1.00  0.00      1S   
ATOM   3079 HG12 VAL   212     -12.686  37.851 -13.839  1.00  0.00      1S   
ATOM   3080 HG13 VAL   212     -13.947  36.766 -13.153  1.00  0.00      1S   
ATOM   3081 CG2  VAL   212     -16.171  38.273 -13.835  1.00  1.00      1S   
ATOM   3082 HG21 VAL   212     -16.930  38.501 -14.612  1.00  0.00      1S   
ATOM   3083 HG22 VAL   212     -16.288  38.991 -12.998  1.00  0.00      1S   
ATOM   3084 HG23 VAL   212     -16.366  37.251 -13.450  1.00  0.00      1S   
ATOM   3085 C    VAL   212     -13.187  39.895 -15.605  1.00  1.00      1S   
ATOM   3086 O    VAL   212     -13.078  39.171 -16.593  1.00  1.00      1S   
ATOM   3087 N    ASP   213     -12.231  40.793 -15.258  1.00  1.00      1S   
ATOM   3088 HN   ASP   213     -12.333  41.369 -14.451  1.00  0.00      1S   
ATOM   3089 CA   ASP   213     -11.050  41.067 -16.054  1.00  1.00      1S   
ATOM   3090 HA   ASP   213     -11.387  41.385 -17.032  1.00  0.00      1S   
ATOM   3091 CB   ASP   213     -10.140  42.156 -15.425  1.00  1.00      1S   
ATOM   3092 HB1  ASP   213      -9.111  42.112 -15.844  1.00  0.00      1S   
ATOM   3093 HB2  ASP   213     -10.078  42.002 -14.327  1.00  0.00      1S   
ATOM   3094 CG   ASP   213     -10.691  43.547 -15.726  1.00  1.00      1S   
ATOM   3095 OD1  ASP   213     -10.721  43.914 -16.931  1.00  1.00      1S   
ATOM   3096 OD2  ASP   213     -11.069  44.262 -14.761  1.00  1.00      1S   
ATOM   3097 C    ASP   213     -10.208  39.831 -16.244  1.00  1.00      1S   
ATOM   3098 O    ASP   213      -9.879  39.123 -15.293  1.00  1.00      1S   
ATOM   3099 N    GLY   214      -9.873  39.541 -17.522  1.00  1.00      1S   
ATOM   3100 HN   GLY   214     -10.158  40.135 -18.270  1.00  0.00      1S   
ATOM   3101 CA   GLY   214      -9.060  38.409 -17.891  1.00  1.00      1S   
ATOM   3102 HA1  GLY   214      -8.288  38.280 -17.145  1.00  0.00      1S   
ATOM   3103 HA2  GLY   214      -8.660  38.622 -18.871  1.00  0.00      1S   
ATOM   3104 C    GLY   214      -9.843  37.130 -17.985  1.00  1.00      1S   
ATOM   3105 O    GLY   214      -9.244  36.073 -18.156  1.00  1.00      1S   
ATOM   3106 N    TYR   215     -11.190  37.175 -17.868  1.00  1.00      1S   
ATOM   3107 HN   TYR   215     -11.670  38.034 -17.694  1.00  0.00      1S   
ATOM   3108 CA   TYR   215     -12.008  35.982 -17.891  1.00  1.00      1S   
ATOM   3109 HA   TYR   215     -11.484  35.184 -18.402  1.00  0.00      1S   
ATOM   3110 CB   TYR   215     -12.430  35.528 -16.472  1.00  1.00      1S   
ATOM   3111 HB1  TYR   215     -13.203  34.732 -16.503  1.00  0.00      1S   
ATOM   3112 HB2  TYR   215     -12.832  36.387 -15.894  1.00  0.00      1S   
ATOM   3113 CG   TYR   215     -11.246  34.954 -15.751  1.00  1.00      1S   
ATOM   3114 CD1  TYR   215     -10.782  33.663 -16.057  1.00  1.00      1S   
ATOM   3115 HD1  TYR   215     -11.279  33.076 -16.812  1.00  0.00      1S   
ATOM   3116 CE1  TYR   215      -9.683  33.121 -15.380  1.00  1.00      1S   
ATOM   3117 HE1  TYR   215      -9.342  32.125 -15.621  1.00  0.00      1S   
ATOM   3118 CZ   TYR   215      -9.014  33.886 -14.415  1.00  1.00      1S   
ATOM   3119 OH   TYR   215      -7.880  33.385 -13.746  1.00  1.00      1S   
ATOM   3120 HH   TYR   215      -7.755  32.456 -13.990  1.00  0.00      1S   
ATOM   3121 CD2  TYR   215     -10.573  35.705 -14.775  1.00  1.00      1S   
ATOM   3122 HD2  TYR   215     -10.906  36.705 -14.542  1.00  0.00      1S   
ATOM   3123 CE2  TYR   215      -9.460  35.177 -14.113  1.00  1.00      1S   
ATOM   3124 HE2  TYR   215      -8.946  35.769 -13.370  1.00  0.00      1S   
ATOM   3125 C    TYR   215     -13.264  36.223 -18.680  1.00  1.00      1S   
ATOM   3126 O    TYR   215     -14.117  35.341 -18.755  1.00  1.00      1S   
ATOM   3127 N    ASP   216     -13.412  37.403 -19.326  1.00  1.00      1S   
ATOM   3128 HN   ASP   216     -12.726  38.123 -19.273  1.00  0.00      1S   
ATOM   3129 CA   ASP   216     -14.589  37.719 -20.105  1.00  1.00      1S   
ATOM   3130 HA   ASP   216     -15.456  37.481 -19.505  1.00  0.00      1S   
ATOM   3131 CB   ASP   216     -14.662  39.207 -20.528  1.00  1.00      1S   
ATOM   3132 HB1  ASP   216     -15.557  39.386 -21.162  1.00  0.00      1S   
ATOM   3133 HB2  ASP   216     -13.754  39.485 -21.103  1.00  0.00      1S   
ATOM   3134 CG   ASP   216     -14.779  40.101 -19.297  1.00  1.00      1S   
ATOM   3135 OD1  ASP   216     -15.500  39.704 -18.345  1.00  1.00      1S   
ATOM   3136 OD2  ASP   216     -14.160  41.197 -19.298  1.00  1.00      1S   
ATOM   3137 C    ASP   216     -14.656  36.870 -21.350  1.00  1.00      1S   
ATOM   3138 O    ASP   216     -13.655  36.316 -21.805  1.00  1.00      1S   
ATOM   3139 N    TYR   217     -15.874  36.727 -21.905  1.00  1.00      1S   
ATOM   3140 HN   TYR   217     -16.681  37.182 -21.529  1.00  0.00      1S   
ATOM   3141 CA   TYR   217     -16.092  35.888 -23.048  1.00  1.00      1S   
ATOM   3142 HA   TYR   217     -15.266  36.016 -23.735  1.00  0.00      1S   
ATOM   3143 CB   TYR   217     -16.271  34.403 -22.635  1.00  1.00      1S   
ATOM   3144 HB1  TYR   217     -17.264  34.223 -22.172  1.00  0.00      1S   
ATOM   3145 HB2  TYR   217     -15.495  34.134 -21.885  1.00  0.00      1S   
ATOM   3146 CG   TYR   217     -16.088  33.491 -23.811  1.00  1.00      1S   
ATOM   3147 CD1  TYR   217     -17.188  33.116 -24.596  1.00  1.00      1S   
ATOM   3148 HD1  TYR   217     -18.171  33.498 -24.362  1.00  0.00      1S   
ATOM   3149 CE1  TYR   217     -17.024  32.255 -25.684  1.00  1.00      1S   
ATOM   3150 HE1  TYR   217     -17.881  31.976 -26.275  1.00  0.00      1S   
ATOM   3151 CZ   TYR   217     -15.753  31.761 -25.995  1.00  1.00      1S   
ATOM   3152 OH   TYR   217     -15.600  30.870 -27.070  1.00  1.00      1S   
ATOM   3153 HH   TYR   217     -14.677  30.909 -27.357  1.00  0.00      1S   
ATOM   3154 CD2  TYR   217     -14.812  33.003 -24.142  1.00  1.00      1S   
ATOM   3155 HD2  TYR   217     -13.957  33.286 -23.546  1.00  0.00      1S   
ATOM   3156 CE2  TYR   217     -14.643  32.143 -25.233  1.00  1.00      1S   
ATOM   3157 HE2  TYR   217     -13.660  31.766 -25.471  1.00  0.00      1S   
ATOM   3158 C    TYR   217     -17.344  36.420 -23.682  1.00  1.00      1S   
ATOM   3159 O    TYR   217     -18.365  36.565 -23.017  1.00  1.00      1S   
ATOM   3160 N    SER   218     -17.294  36.748 -24.991  1.00  1.00      1S   
ATOM   3161 HN   SER   218     -16.468  36.625 -25.535  1.00  0.00      1S   
ATOM   3162 CA   SER   218     -18.432  37.306 -25.684  1.00  1.00      1S   
ATOM   3163 HA   SER   218     -19.091  37.773 -24.965  1.00  0.00      1S   
ATOM   3164 CB   SER   218     -18.034  38.409 -26.704  1.00  1.00      1S   
ATOM   3165 HB1  SER   218     -17.356  39.130 -26.197  1.00  0.00      1S   
ATOM   3166 HB2  SER   218     -18.936  38.960 -27.043  1.00  0.00      1S   
ATOM   3167 OG   SER   218     -17.357  37.895 -27.846  1.00  1.00      1S   
ATOM   3168 HG1  SER   218     -16.975  38.647 -28.307  1.00  0.00      1S   
ATOM   3169 C    SER   218     -19.189  36.185 -26.350  1.00  1.00      1S   
ATOM   3170 O    SER   218     -18.694  35.069 -26.488  1.00  1.00      1S   
ATOM   3171 N    ARG   219     -20.427  36.468 -26.798  1.00  1.00      1S   
ATOM   3172 HN   ARG   219     -20.840  37.365 -26.661  1.00  0.00      1S   
ATOM   3173 CA   ARG   219     -21.261  35.490 -27.454  1.00  1.00      1S   
ATOM   3174 HA   ARG   219     -21.229  34.574 -26.880  1.00  0.00      1S   
ATOM   3175 CB   ARG   219     -22.716  35.969 -27.529  1.00  1.00      1S   
ATOM   3176 HB1  ARG   219     -23.338  35.195 -28.032  1.00  0.00      1S   
ATOM   3177 HB2  ARG   219     -22.787  36.907 -28.122  1.00  0.00      1S   
ATOM   3178 CG   ARG   219     -23.285  36.212 -26.126  1.00  1.00      1S   
ATOM   3179 HG1  ARG   219     -22.812  37.106 -25.664  1.00  0.00      1S   
ATOM   3180 HG2  ARG   219     -23.032  35.329 -25.496  1.00  0.00      1S   
ATOM   3181 CD   ARG   219     -24.802  36.367 -26.114  1.00  1.00      1S   
ATOM   3182 HD1  ARG   219     -25.192  36.449 -25.079  1.00  0.00      1S   
ATOM   3183 HD2  ARG   219     -25.258  35.477 -26.591  1.00  0.00      1S   
ATOM   3184 NE   ARG   219     -25.193  37.560 -26.921  1.00  1.00      1S   
ATOM   3185 HE   ARG   219     -25.312  37.439 -27.910  1.00  0.00      1S   
ATOM   3186 CZ   ARG   219     -25.502  38.772 -26.382  1.00  1.00      1S   
ATOM   3187 NH1  ARG   219     -25.372  39.019 -25.053  1.00  1.00      1S   
ATOM   3188 HH11 ARG   219     -24.970  38.323 -24.445  1.00  0.00      1S   
ATOM   3189 HH12 ARG   219     -25.605  39.908 -24.680  1.00  0.00      1S   
ATOM   3190 NH2  ARG   219     -25.970  39.754 -27.196  1.00  1.00      1S   
ATOM   3191 HH21 ARG   219     -26.137  39.540 -28.162  1.00  0.00      1S   
ATOM   3192 HH22 ARG   219     -26.215  40.643 -26.817  1.00  0.00      1S   
ATOM   3193 C    ARG   219     -20.775  35.190 -28.847  1.00  1.00      1S   
ATOM   3194 O    ARG   219     -20.859  34.053 -29.305  1.00  1.00      1S   
ATOM   3195 N    GLY   220     -20.214  36.207 -29.542  1.00  1.00      1S   
ATOM   3196 HN   GLY   220     -20.149  37.121 -29.150  1.00  0.00      1S   
ATOM   3197 CA   GLY   220     -19.668  36.048 -30.872  1.00  1.00      1S   
ATOM   3198 HA1  GLY   220     -19.489  37.040 -31.259  1.00  0.00      1S   
ATOM   3199 HA2  GLY   220     -20.373  35.482 -31.466  1.00  0.00      1S   
ATOM   3200 C    GLY   220     -18.356  35.312 -30.860  1.00  1.00      1S   
ATOM   3201 O    GLY   220     -17.976  34.708 -31.860  1.00  1.00      1S   
ATOM   3202 N    GLN   221     -17.639  35.321 -29.710  1.00  1.00      1S   
ATOM   3203 HN   GLN   221     -17.962  35.822 -28.910  1.00  0.00      1S   
ATOM   3204 CA   GLN   221     -16.359  34.665 -29.545  1.00  1.00      1S   
ATOM   3205 HA   GLN   221     -15.728  34.995 -30.359  1.00  0.00      1S   
ATOM   3206 CB   GLN   221     -15.701  35.048 -28.195  1.00  1.00      1S   
ATOM   3207 HB1  GLN   221     -16.341  34.695 -27.358  1.00  0.00      1S   
ATOM   3208 HB2  GLN   221     -15.659  36.156 -28.134  1.00  0.00      1S   
ATOM   3209 CG   GLN   221     -14.269  34.528 -27.972  1.00  1.00      1S   
ATOM   3210 HG1  GLN   221     -14.274  33.420 -27.944  1.00  0.00      1S   
ATOM   3211 HG2  GLN   221     -13.888  34.899 -26.997  1.00  0.00      1S   
ATOM   3212 CD   GLN   221     -13.348  35.036 -29.085  1.00  1.00      1S   
ATOM   3213 OE1  GLN   221     -13.368  36.223 -29.428  1.00  1.00      1S   
ATOM   3214 NE2  GLN   221     -12.517  34.114 -29.653  1.00  1.00      1S   
ATOM   3215 HE21 GLN   221     -12.534  33.159 -29.345  1.00  0.00      1S   
ATOM   3216 HE22 GLN   221     -11.915  34.389 -30.399  1.00  0.00      1S   
ATOM   3217 C    GLN   221     -16.494  33.164 -29.631  1.00  1.00      1S   
ATOM   3218 O    GLN   221     -15.577  32.479 -30.079  1.00  1.00      1S   
ATOM   3219 N    LEU   222     -17.676  32.618 -29.251  1.00  1.00      1S   
ATOM   3220 HN   LEU   222     -18.406  33.192 -28.887  1.00  0.00      1S   
ATOM   3221 CA   LEU   222     -17.976  31.207 -29.349  1.00  1.00      1S   
ATOM   3222 HA   LEU   222     -17.196  30.673 -28.834  1.00  0.00      1S   
ATOM   3223 CB   LEU   222     -19.333  30.839 -28.716  1.00  1.00      1S   
ATOM   3224 HB1  LEU   222     -20.145  31.345 -29.281  1.00  0.00      1S   
ATOM   3225 HB2  LEU   222     -19.370  31.227 -27.676  1.00  0.00      1S   
ATOM   3226 CG   LEU   222     -19.607  29.316 -28.674  1.00  1.00      1S   
ATOM   3227 HG   LEU   222     -19.314  28.864 -29.649  1.00  0.00      1S   
ATOM   3228 CD1  LEU   222     -18.776  28.606 -27.588  1.00  1.00      1S   
ATOM   3229 HD11 LEU   222     -19.036  29.001 -26.585  1.00  0.00      1S   
ATOM   3230 HD12 LEU   222     -17.690  28.765 -27.756  1.00  0.00      1S   
ATOM   3231 HD13 LEU   222     -18.975  27.514 -27.603  1.00  0.00      1S   
ATOM   3232 CD2  LEU   222     -21.111  29.044 -28.546  1.00  1.00      1S   
ATOM   3233 HD21 LEU   222     -21.640  29.494 -29.412  1.00  0.00      1S   
ATOM   3234 HD22 LEU   222     -21.512  29.490 -27.614  1.00  0.00      1S   
ATOM   3235 HD23 LEU   222     -21.307  27.951 -28.545  1.00  0.00      1S   
ATOM   3236 C    LEU   222     -17.973  30.723 -30.773  1.00  1.00      1S   
ATOM   3237 O    LEU   222     -17.443  29.650 -31.049  1.00  1.00      1S   
ATOM   3238 N    ILE   223     -18.531  31.517 -31.720  1.00  1.00      1S   
ATOM   3239 HN   ILE   223     -18.943  32.391 -31.472  1.00  0.00      1S   
ATOM   3240 CA   ILE   223     -18.534  31.204 -33.139  1.00  1.00      1S   
ATOM   3241 HA   ILE   223     -19.054  30.264 -33.262  1.00  0.00      1S   
ATOM   3242 CB   ILE   223     -19.240  32.275 -33.978  1.00  1.00      1S   
ATOM   3243 HB   ILE   223     -18.839  33.275 -33.700  1.00  0.00      1S   
ATOM   3244 CG2  ILE   223     -18.979  32.068 -35.491  1.00  1.00      1S   
ATOM   3245 HG21 ILE   223     -19.317  31.060 -35.808  1.00  0.00      1S   
ATOM   3246 HG22 ILE   223     -17.903  32.180 -35.740  1.00  0.00      1S   
ATOM   3247 HG23 ILE   223     -19.515  32.829 -36.092  1.00  0.00      1S   
ATOM   3248 CG1  ILE   223     -20.754  32.261 -33.663  1.00  1.00      1S   
ATOM   3249 HG11 ILE   223     -20.889  32.405 -32.570  1.00  0.00      1S   
ATOM   3250 HG12 ILE   223     -21.165  31.263 -33.928  1.00  0.00      1S   
ATOM   3251 CD   ILE   223     -21.558  33.341 -34.394  1.00  1.00      1S   
ATOM   3252 HD1  ILE   223     -21.467  33.237 -35.495  1.00  0.00      1S   
ATOM   3253 HD2  ILE   223     -21.207  34.352 -34.098  1.00  0.00      1S   
ATOM   3254 HD3  ILE   223     -22.633  33.251 -34.144  1.00  0.00      1S   
ATOM   3255 C    ILE   223     -17.120  31.010 -33.634  1.00  1.00      1S   
ATOM   3256 O    ILE   223     -16.829  30.035 -34.323  1.00  1.00      1S   
ATOM   3257 N    GLU   224     -16.203  31.927 -33.256  1.00  1.00      1S   
ATOM   3258 HN   GLU   224     -16.446  32.675 -32.642  1.00  0.00      1S   
ATOM   3259 CA   GLU   224     -14.842  31.940 -33.733  1.00  1.00      1S   
ATOM   3260 HA   GLU   224     -14.863  31.826 -34.809  1.00  0.00      1S   
ATOM   3261 CB   GLU   224     -14.150  33.274 -33.389  1.00  1.00      1S   
ATOM   3262 HB1  GLU   224     -13.054  33.210 -33.572  1.00  0.00      1S   
ATOM   3263 HB2  GLU   224     -14.307  33.476 -32.306  1.00  0.00      1S   
ATOM   3264 CG   GLU   224     -14.713  34.430 -34.244  1.00  1.00      1S   
ATOM   3265 HG1  GLU   224     -15.792  34.254 -34.447  1.00  0.00      1S   
ATOM   3266 HG2  GLU   224     -14.183  34.463 -35.220  1.00  0.00      1S   
ATOM   3267 CD   GLU   224     -14.583  35.788 -33.554  1.00  1.00      1S   
ATOM   3268 OE1  GLU   224     -15.331  36.716 -33.964  1.00  1.00      1S   
ATOM   3269 OE2  GLU   224     -13.750  35.920 -32.620  1.00  1.00      1S   
ATOM   3270 C    GLU   224     -14.049  30.794 -33.171  1.00  1.00      1S   
ATOM   3271 O    GLU   224     -13.284  30.171 -33.898  1.00  1.00      1S   
ATOM   3272 N    ASP   225     -14.229  30.459 -31.874  1.00  1.00      1S   
ATOM   3273 HN   ASP   225     -14.850  30.975 -31.286  1.00  0.00      1S   
ATOM   3274 CA   ASP   225     -13.490  29.394 -31.232  1.00  1.00      1S   
ATOM   3275 HA   ASP   225     -12.457  29.468 -31.549  1.00  0.00      1S   
ATOM   3276 CB   ASP   225     -13.547  29.470 -29.691  1.00  1.00      1S   
ATOM   3277 HB1  ASP   225     -13.049  28.587 -29.235  1.00  0.00      1S   
ATOM   3278 HB2  ASP   225     -14.605  29.499 -29.352  1.00  0.00      1S   
ATOM   3279 CG   ASP   225     -12.817  30.721 -29.206  1.00  1.00      1S   
ATOM   3280 OD1  ASP   225     -11.908  31.216 -29.923  1.00  1.00      1S   
ATOM   3281 OD2  ASP   225     -13.145  31.194 -28.089  1.00  1.00      1S   
ATOM   3282 C    ASP   225     -13.967  28.038 -31.671  1.00  1.00      1S   
ATOM   3283 O    ASP   225     -13.153  27.133 -31.805  1.00  1.00      1S   
ATOM   3284 N    VAL   226     -15.279  27.860 -31.958  1.00  1.00      1S   
ATOM   3285 HN   VAL   226     -15.941  28.595 -31.822  1.00  0.00      1S   
ATOM   3286 CA   VAL   226     -15.810  26.630 -32.520  1.00  1.00      1S   
ATOM   3287 HA   VAL   226     -15.480  25.810 -31.897  1.00  0.00      1S   
ATOM   3288 CB   VAL   226     -17.337  26.615 -32.560  1.00  1.00      1S   
ATOM   3289 HB   VAL   226     -17.709  27.604 -32.910  1.00  0.00      1S   
ATOM   3290 CG1  VAL   226     -17.877  25.532 -33.518  1.00  1.00      1S   
ATOM   3291 HG11 VAL   226     -17.426  24.543 -33.292  1.00  0.00      1S   
ATOM   3292 HG12 VAL   226     -17.659  25.795 -34.574  1.00  0.00      1S   
ATOM   3293 HG13 VAL   226     -18.978  25.454 -33.416  1.00  0.00      1S   
ATOM   3294 CG2  VAL   226     -17.858  26.365 -31.129  1.00  1.00      1S   
ATOM   3295 HG21 VAL   226     -17.501  27.148 -30.430  1.00  0.00      1S   
ATOM   3296 HG22 VAL   226     -17.510  25.376 -30.762  1.00  0.00      1S   
ATOM   3297 HG23 VAL   226     -18.969  26.368 -31.124  1.00  0.00      1S   
ATOM   3298 C    VAL   226     -15.224  26.408 -33.896  1.00  1.00      1S   
ATOM   3299 O    VAL   226     -14.763  25.313 -34.200  1.00  1.00      1S   
ATOM   3300 N    GLU   227     -15.192  27.457 -34.746  1.00  1.00      1S   
ATOM   3301 HN   GLU   227     -15.567  28.345 -34.482  1.00  0.00      1S   
ATOM   3302 CA   GLU   227     -14.673  27.386 -36.093  1.00  1.00      1S   
ATOM   3303 HA   GLU   227     -15.136  26.537 -36.578  1.00  0.00      1S   
ATOM   3304 CB   GLU   227     -15.051  28.655 -36.885  1.00  1.00      1S   
ATOM   3305 HB1  GLU   227     -14.439  28.739 -37.811  1.00  0.00      1S   
ATOM   3306 HB2  GLU   227     -14.864  29.554 -36.258  1.00  0.00      1S   
ATOM   3307 CG   GLU   227     -16.533  28.570 -37.293  1.00  1.00      1S   
ATOM   3308 HG1  GLU   227     -17.169  28.345 -36.411  1.00  0.00      1S   
ATOM   3309 HG2  GLU   227     -16.603  27.723 -38.002  1.00  0.00      1S   
ATOM   3310 CD   GLU   227     -17.077  29.822 -37.976  1.00  1.00      1S   
ATOM   3311 OE1  GLU   227     -16.393  30.878 -37.960  1.00  1.00      1S   
ATOM   3312 OE2  GLU   227     -18.211  29.723 -38.522  1.00  1.00      1S   
ATOM   3313 C    GLU   227     -13.184  27.155 -36.139  1.00  1.00      1S   
ATOM   3314 O    GLU   227     -12.710  26.354 -36.942  1.00  1.00      1S   
ATOM   3315 N    HSD   228     -12.407  27.820 -35.255  1.00  1.00      1S   
ATOM   3316 HN   HSD   228     -12.805  28.479 -34.616  1.00  0.00      1S   
ATOM   3317 CA   HSD   228     -10.968  27.684 -35.197  1.00  1.00      1S   
ATOM   3318 HA   HSD   228     -10.583  27.801 -36.200  1.00  0.00      1S   
ATOM   3319 CB   HSD   228     -10.309  28.743 -34.288  1.00  1.00      1S   
ATOM   3320 HB1  HSD   228      -9.222  28.534 -34.181  1.00  0.00      1S   
ATOM   3321 HB2  HSD   228     -10.774  28.706 -33.279  1.00  0.00      1S   
ATOM   3322 ND1  HSD   228     -10.179  31.275 -34.103  1.00  1.00      1S   
ATOM   3323 HD1  HSD   228      -9.900  31.302 -33.142  1.00  0.00      1S   
ATOM   3324 CG   HSD   228     -10.448  30.139 -34.835  1.00  1.00      1S   
ATOM   3325 CE1  HSD   228     -10.389  32.332 -34.927  1.00  1.00      1S   
ATOM   3326 HE1  HSD   228     -10.256  33.365 -34.609  1.00  0.00      1S   
ATOM   3327 NE2  HSD   228     -10.768  31.957 -36.133  1.00  1.00      1S   
ATOM   3328 CD2  HSD   228     -10.804  30.576 -36.076  1.00  1.00      1S   
ATOM   3329 HD2  HSD   228     -11.087  30.015 -36.958  1.00  0.00      1S   
ATOM   3330 C    HSD   228     -10.568  26.314 -34.721  1.00  1.00      1S   
ATOM   3331 O    HSD   228      -9.697  25.691 -35.320  1.00  1.00      1S   
ATOM   3332 N    THR   229     -11.226  25.789 -33.662  1.00  1.00      1S   
ATOM   3333 HN   THR   229     -11.926  26.312 -33.179  1.00  0.00      1S   
ATOM   3334 CA   THR   229     -10.970  24.455 -33.157  1.00  1.00      1S   
ATOM   3335 HA   THR   229      -9.901  24.365 -33.015  1.00  0.00      1S   
ATOM   3336 CB   THR   229     -11.635  24.174 -31.813  1.00  1.00      1S   
ATOM   3337 HB   THR   229     -11.497  23.111 -31.558  1.00  0.00      1S   
ATOM   3338 OG1  THR   229     -13.040  24.382 -31.826  1.00  1.00      1S   
ATOM   3339 HG1  THR   229     -13.164  25.332 -31.922  1.00  0.00      1S   
ATOM   3340 CG2  THR   229     -10.992  25.021 -30.694  1.00  1.00      1S   
ATOM   3341 HG21 THR   229     -11.127  26.105 -30.884  1.00  0.00      1S   
ATOM   3342 HG22 THR   229      -9.903  24.814 -30.630  1.00  0.00      1S   
ATOM   3343 HG23 THR   229     -11.453  24.779 -29.713  1.00  0.00      1S   
ATOM   3344 C    THR   229     -11.373  23.392 -34.165  1.00  1.00      1S   
ATOM   3345 O    THR   229     -10.733  22.348 -34.263  1.00  1.00      1S   
ATOM   3346 N    PHE   230     -12.434  23.649 -34.966  1.00  1.00      1S   
ATOM   3347 HN   PHE   230     -12.946  24.502 -34.882  1.00  0.00      1S   
ATOM   3348 CA   PHE   230     -12.958  22.706 -35.929  1.00  1.00      1S   
ATOM   3349 HA   PHE   230     -13.045  21.756 -35.419  1.00  0.00      1S   
ATOM   3350 CB   PHE   230     -14.361  23.121 -36.446  1.00  1.00      1S   
ATOM   3351 HB1  PHE   230     -14.311  24.097 -36.974  1.00  0.00      1S   
ATOM   3352 HB2  PHE   230     -15.060  23.221 -35.589  1.00  0.00      1S   
ATOM   3353 CG   PHE   230     -14.934  22.078 -37.365  1.00  1.00      1S   
ATOM   3354 CD1  PHE   230     -15.258  20.803 -36.876  1.00  1.00      1S   
ATOM   3355 HD1  PHE   230     -15.138  20.581 -35.827  1.00  0.00      1S   
ATOM   3356 CE1  PHE   230     -15.698  19.803 -37.747  1.00  1.00      1S   
ATOM   3357 HE1  PHE   230     -15.932  18.826 -37.355  1.00  0.00      1S   
ATOM   3358 CZ   PHE   230     -15.824  20.071 -39.116  1.00  1.00      1S   
ATOM   3359 HZ   PHE   230     -16.161  19.302 -39.795  1.00  0.00      1S   
ATOM   3360 CD2  PHE   230     -15.053  22.337 -38.740  1.00  1.00      1S   
ATOM   3361 HD2  PHE   230     -14.779  23.307 -39.127  1.00  0.00      1S   
ATOM   3362 CE2  PHE   230     -15.502  21.339 -39.612  1.00  1.00      1S   
ATOM   3363 HE2  PHE   230     -15.597  21.547 -40.667  1.00  0.00      1S   
ATOM   3364 C    PHE   230     -12.008  22.520 -37.091  1.00  1.00      1S   
ATOM   3365 O    PHE   230     -11.881  21.413 -37.607  1.00  1.00      1S   
ATOM   3366 N    GLU   231     -11.296  23.591 -37.513  1.00  1.00      1S   
ATOM   3367 HN   GLU   231     -11.434  24.490 -37.102  1.00  0.00      1S   
ATOM   3368 CA   GLU   231     -10.293  23.530 -38.560  1.00  1.00      1S   
ATOM   3369 HA   GLU   231     -10.776  23.191 -39.465  1.00  0.00      1S   
ATOM   3370 CB   GLU   231      -9.632  24.908 -38.801  1.00  1.00      1S   
ATOM   3371 HB1  GLU   231      -8.640  24.793 -39.293  1.00  0.00      1S   
ATOM   3372 HB2  GLU   231      -9.451  25.388 -37.815  1.00  0.00      1S   
ATOM   3373 CG   GLU   231     -10.481  25.863 -39.661  1.00  1.00      1S   
ATOM   3374 HG1  GLU   231     -10.044  26.883 -39.616  1.00  0.00      1S   
ATOM   3375 HG2  GLU   231     -11.517  25.909 -39.265  1.00  0.00      1S   
ATOM   3376 CD   GLU   231     -10.518  25.426 -41.126  1.00  1.00      1S   
ATOM   3377 OE1  GLU   231      -9.533  24.815 -41.618  1.00  1.00      1S   
ATOM   3378 OE2  GLU   231     -11.552  25.716 -41.783  1.00  1.00      1S   
ATOM   3379 C    GLU   231      -9.195  22.544 -38.234  1.00  1.00      1S   
ATOM   3380 O    GLU   231      -8.720  21.822 -39.107  1.00  1.00      1S   
ATOM   3381 N    GLU   232      -8.793  22.472 -36.947  1.00  1.00      1S   
ATOM   3382 HN   GLU   232      -9.201  23.055 -36.247  1.00  0.00      1S   
ATOM   3383 CA   GLU   232      -7.732  21.607 -36.490  1.00  1.00      1S   
ATOM   3384 HA   GLU   232      -6.929  21.649 -37.213  1.00  0.00      1S   
ATOM   3385 CB   GLU   232      -7.196  22.085 -35.125  1.00  1.00      1S   
ATOM   3386 HB1  GLU   232      -6.261  21.531 -34.886  1.00  0.00      1S   
ATOM   3387 HB2  GLU   232      -7.958  21.847 -34.352  1.00  0.00      1S   
ATOM   3388 CG   GLU   232      -6.925  23.604 -35.070  1.00  1.00      1S   
ATOM   3389 HG1  GLU   232      -7.879  24.153 -35.200  1.00  0.00      1S   
ATOM   3390 HG2  GLU   232      -6.234  23.902 -35.885  1.00  0.00      1S   
ATOM   3391 CD   GLU   232      -6.318  24.011 -33.727  1.00  1.00      1S   
ATOM   3392 OE1  GLU   232      -5.214  23.501 -33.399  1.00  1.00      1S   
ATOM   3393 OE2  GLU   232      -6.949  24.838 -33.014  1.00  1.00      1S   
ATOM   3394 C    GLU   232      -8.195  20.165 -36.357  1.00  1.00      1S   
ATOM   3395 O    GLU   232      -7.377  19.248 -36.319  1.00  1.00      1S   
ATOM   3396 N    ILE   233      -9.531  19.940 -36.300  1.00  1.00      1S   
ATOM   3397 HN   ILE   233     -10.163  20.713 -36.332  1.00  0.00      1S   
ATOM   3398 CA   ILE   233     -10.173  18.641 -36.212  1.00  1.00      1S   
ATOM   3399 HA   ILE   233      -9.550  17.992 -35.612  1.00  0.00      1S   
ATOM   3400 CB   ILE   233     -11.546  18.765 -35.542  1.00  1.00      1S   
ATOM   3401 HB   ILE   233     -11.936  19.786 -35.753  1.00  0.00      1S   
ATOM   3402 CG2  ILE   233     -12.606  17.763 -36.067  1.00  1.00      1S   
ATOM   3403 HG21 ILE   233     -12.225  16.722 -36.014  1.00  0.00      1S   
ATOM   3404 HG22 ILE   233     -12.880  17.997 -37.118  1.00  0.00      1S   
ATOM   3405 HG23 ILE   233     -13.533  17.823 -35.462  1.00  0.00      1S   
ATOM   3406 CG1  ILE   233     -11.371  18.651 -34.013  1.00  1.00      1S   
ATOM   3407 HG11 ILE   233     -10.421  19.143 -33.708  1.00  0.00      1S   
ATOM   3408 HG12 ILE   233     -11.295  17.575 -33.745  1.00  0.00      1S   
ATOM   3409 CD   ILE   233     -12.519  19.301 -33.237  1.00  1.00      1S   
ATOM   3410 HD1  ILE   233     -13.503  18.950 -33.611  1.00  0.00      1S   
ATOM   3411 HD2  ILE   233     -12.478  20.405 -33.352  1.00  0.00      1S   
ATOM   3412 HD3  ILE   233     -12.444  19.056 -32.157  1.00  0.00      1S   
ATOM   3413 C    ILE   233     -10.273  18.008 -37.579  1.00  1.00      1S   
ATOM   3414 O    ILE   233     -10.207  16.784 -37.689  1.00  1.00      1S   
ATOM   3415 N    LYS   234     -10.419  18.825 -38.652  1.00  1.00      1S   
ATOM   3416 HN   LYS   234     -10.450  19.815 -38.530  1.00  0.00      1S   
ATOM   3417 CA   LYS   234     -10.573  18.372 -40.023  1.00  1.00      1S   
ATOM   3418 HA   LYS   234     -11.557  17.927 -40.075  1.00  0.00      1S   
ATOM   3419 CB   LYS   234     -10.538  19.515 -41.061  1.00  1.00      1S   
ATOM   3420 HB1  LYS   234     -10.384  19.110 -42.088  1.00  0.00      1S   
ATOM   3421 HB2  LYS   234      -9.686  20.191 -40.836  1.00  0.00      1S   
ATOM   3422 CG   LYS   234     -11.829  20.333 -41.093  1.00  1.00      1S   
ATOM   3423 HG1  LYS   234     -12.047  20.717 -40.073  1.00  0.00      1S   
ATOM   3424 HG2  LYS   234     -12.673  19.675 -41.400  1.00  0.00      1S   
ATOM   3425 CD   LYS   234     -11.726  21.512 -42.064  1.00  1.00      1S   
ATOM   3426 HD1  LYS   234     -11.647  21.117 -43.102  1.00  0.00      1S   
ATOM   3427 HD2  LYS   234     -10.794  22.080 -41.839  1.00  0.00      1S   
ATOM   3428 CE   LYS   234     -12.930  22.446 -41.944  1.00  1.00      1S   
ATOM   3429 HE1  LYS   234     -12.983  22.872 -40.918  1.00  0.00      1S   
ATOM   3430 HE2  LYS   234     -13.868  21.895 -42.165  1.00  0.00      1S   
ATOM   3431 NZ   LYS   234     -12.830  23.568 -42.897  1.00  1.00      1S   
ATOM   3432 HZ1  LYS   234     -12.639  23.216 -43.855  1.00  0.00      1S   
ATOM   3433 HZ2  LYS   234     -12.054  24.204 -42.594  1.00  0.00      1S   
ATOM   3434 HZ3  LYS   234     -13.715  24.113 -42.889  1.00  0.00      1S   
ATOM   3435 C    LYS   234      -9.605  17.305 -40.486  1.00  1.00      1S   
ATOM   3436 O    LYS   234     -10.109  16.384 -41.117  1.00  1.00      1S   
ATOM   3437 N    PRO   235      -8.289  17.281 -40.258  1.00  1.00      1S   
ATOM   3438 CD   PRO   235      -7.497  18.386 -39.718  1.00  1.00      1S   
ATOM   3439 HD1  PRO   235      -7.377  18.212 -38.628  1.00  0.00      1S   
ATOM   3440 HD2  PRO   235      -7.960  19.377 -39.898  1.00  0.00      1S   
ATOM   3441 CA   PRO   235      -7.436  16.256 -40.840  1.00  1.00      1S   
ATOM   3442 HA   PRO   235      -7.653  16.202 -41.899  1.00  0.00      1S   
ATOM   3443 CB   PRO   235      -6.005  16.743 -40.575  1.00  1.00      1S   
ATOM   3444 HB1  PRO   235      -5.320  16.472 -41.404  1.00  0.00      1S   
ATOM   3445 HB2  PRO   235      -5.612  16.335 -39.619  1.00  0.00      1S   
ATOM   3446 CG   PRO   235      -6.154  18.260 -40.427  1.00  1.00      1S   
ATOM   3447 HG1  PRO   235      -5.325  18.720 -39.855  1.00  0.00      1S   
ATOM   3448 HG2  PRO   235      -6.227  18.731 -41.432  1.00  0.00      1S   
ATOM   3449 C    PRO   235      -7.691  14.896 -40.230  1.00  1.00      1S   
ATOM   3450 O    PRO   235      -7.685  13.913 -40.966  1.00  1.00      1S   
ATOM   3451 N    LEU   236      -7.967  14.817 -38.905  1.00  1.00      1S   
ATOM   3452 HN   LEU   236      -7.933  15.629 -38.327  1.00  0.00      1S   
ATOM   3453 CA   LEU   236      -8.366  13.592 -38.239  1.00  1.00      1S   
ATOM   3454 HA   LEU   236      -7.602  12.853 -38.429  1.00  0.00      1S   
ATOM   3455 CB   LEU   236      -8.520  13.791 -36.708  1.00  1.00      1S   
ATOM   3456 HB1  LEU   236      -9.236  14.621 -36.519  1.00  0.00      1S   
ATOM   3457 HB2  LEU   236      -7.533  14.112 -36.307  1.00  0.00      1S   
ATOM   3458 CG   LEU   236      -8.987  12.553 -35.898  1.00  1.00      1S   
ATOM   3459 HG   LEU   236     -10.041  12.334 -36.187  1.00  0.00      1S   
ATOM   3460 CD1  LEU   236      -8.164  11.283 -36.190  1.00  1.00      1S   
ATOM   3461 HD11 LEU   236      -7.081  11.490 -36.066  1.00  0.00      1S   
ATOM   3462 HD12 LEU   236      -8.342  10.925 -37.225  1.00  0.00      1S   
ATOM   3463 HD13 LEU   236      -8.453  10.469 -35.493  1.00  0.00      1S   
ATOM   3464 CD2  LEU   236      -8.993  12.861 -34.388  1.00  1.00      1S   
ATOM   3465 HD21 LEU   236      -9.649  13.729 -34.168  1.00  0.00      1S   
ATOM   3466 HD22 LEU   236      -7.965  13.091 -34.038  1.00  0.00      1S   
ATOM   3467 HD23 LEU   236      -9.370  11.983 -33.823  1.00  0.00      1S   
ATOM   3468 C    LEU   236      -9.664  13.083 -38.815  1.00  1.00      1S   
ATOM   3469 O    LEU   236      -9.796  11.897 -39.110  1.00  1.00      1S   
ATOM   3470 N    TYR   237     -10.640  13.992 -39.031  1.00  1.00      1S   
ATOM   3471 HN   TYR   237     -10.501  14.957 -38.814  1.00  0.00      1S   
ATOM   3472 CA   TYR   237     -11.938  13.647 -39.554  1.00  1.00      1S   
ATOM   3473 HA   TYR   237     -12.297  12.815 -38.962  1.00  0.00      1S   
ATOM   3474 CB   TYR   237     -12.944  14.817 -39.419  1.00  1.00      1S   
ATOM   3475 HB1  TYR   237     -12.587  15.707 -39.980  1.00  0.00      1S   
ATOM   3476 HB2  TYR   237     -13.057  15.094 -38.349  1.00  0.00      1S   
ATOM   3477 CG   TYR   237     -14.298  14.405 -39.936  1.00  1.00      1S   
ATOM   3478 CD1  TYR   237     -15.002  13.353 -39.323  1.00  1.00      1S   
ATOM   3479 HD1  TYR   237     -14.602  12.870 -38.445  1.00  0.00      1S   
ATOM   3480 CE1  TYR   237     -16.229  12.925 -39.840  1.00  1.00      1S   
ATOM   3481 HE1  TYR   237     -16.778  12.138 -39.344  1.00  0.00      1S   
ATOM   3482 CZ   TYR   237     -16.763  13.551 -40.971  1.00  1.00      1S   
ATOM   3483 OH   TYR   237     -18.039  13.163 -41.405  1.00  1.00      1S   
ATOM   3484 HH   TYR   237     -18.264  13.689 -42.182  1.00  0.00      1S   
ATOM   3485 CD2  TYR   237     -14.825  15.001 -41.095  1.00  1.00      1S   
ATOM   3486 HD2  TYR   237     -14.276  15.791 -41.586  1.00  0.00      1S   
ATOM   3487 CE2  TYR   237     -16.056  14.580 -41.613  1.00  1.00      1S   
ATOM   3488 HE2  TYR   237     -16.463  15.070 -42.485  1.00  0.00      1S   
ATOM   3489 C    TYR   237     -11.865  13.181 -40.994  1.00  1.00      1S   
ATOM   3490 O    TYR   237     -12.509  12.197 -41.337  1.00  1.00      1S   
ATOM   3491 N    GLU   238     -11.088  13.859 -41.867  1.00  1.00      1S   
ATOM   3492 HN   GLU   238     -10.594  14.681 -41.582  1.00  0.00      1S   
ATOM   3493 CA   GLU   238     -10.933  13.501 -43.263  1.00  1.00      1S   
ATOM   3494 HA   GLU   238     -11.912  13.504 -43.717  1.00  0.00      1S   
ATOM   3495 CB   GLU   238     -10.017  14.481 -44.029  1.00  1.00      1S   
ATOM   3496 HB1  GLU   238      -9.722  14.021 -45.000  1.00  0.00      1S   
ATOM   3497 HB2  GLU   238      -9.092  14.661 -43.439  1.00  0.00      1S   
ATOM   3498 CG   GLU   238     -10.707  15.819 -44.348  1.00  1.00      1S   
ATOM   3499 HG1  GLU   238     -10.987  16.350 -43.416  1.00  0.00      1S   
ATOM   3500 HG2  GLU   238     -11.633  15.627 -44.931  1.00  0.00      1S   
ATOM   3501 CD   GLU   238      -9.785  16.706 -45.183  1.00  1.00      1S   
ATOM   3502 OE1  GLU   238      -9.123  16.171 -46.112  1.00  1.00      1S   
ATOM   3503 OE2  GLU   238      -9.743  17.934 -44.907  1.00  1.00      1S   
ATOM   3504 C    GLU   238     -10.355  12.120 -43.424  1.00  1.00      1S   
ATOM   3505 O    GLU   238     -10.777  11.366 -44.297  1.00  1.00      1S   
ATOM   3506 N    HSD   239      -9.389  11.750 -42.558  1.00  1.00      1S   
ATOM   3507 HN   HSD   239      -9.057  12.385 -41.862  1.00  0.00      1S   
ATOM   3508 CA   HSD   239      -8.772  10.448 -42.570  1.00  1.00      1S   
ATOM   3509 HA   HSD   239      -8.582  10.187 -43.603  1.00  0.00      1S   
ATOM   3510 CB   HSD   239      -7.420  10.464 -41.825  1.00  1.00      1S   
ATOM   3511 HB1  HSD   239      -7.136   9.441 -41.510  1.00  0.00      1S   
ATOM   3512 HB2  HSD   239      -7.502  11.095 -40.914  1.00  0.00      1S   
ATOM   3513 ND1  HSD   239      -5.701  10.187 -43.669  1.00  1.00      1S   
ATOM   3514 HD1  HSD   239      -5.815   9.200 -43.780  1.00  0.00      1S   
ATOM   3515 CG   HSD   239      -6.317  10.974 -42.719  1.00  1.00      1S   
ATOM   3516 CE1  HSD   239      -4.827  10.978 -44.336  1.00  1.00      1S   
ATOM   3517 HE1  HSD   239      -4.193  10.610 -45.141  1.00  0.00      1S   
ATOM   3518 NE2  HSD   239      -4.832  12.214 -43.882  1.00  1.00      1S   
ATOM   3519 CD2  HSD   239      -5.770  12.212 -42.865  1.00  1.00      1S   
ATOM   3520 HD2  HSD   239      -5.952  13.133 -42.335  1.00  0.00      1S   
ATOM   3521 C    HSD   239      -9.697   9.383 -42.019  1.00  1.00      1S   
ATOM   3522 O    HSD   239      -9.750   8.279 -42.555  1.00  1.00      1S   
ATOM   3523 N    LEU   240     -10.496   9.686 -40.968  1.00  1.00      1S   
ATOM   3524 HN   LEU   240     -10.425  10.567 -40.502  1.00  0.00      1S   
ATOM   3525 CA   LEU   240     -11.512   8.784 -40.452  1.00  1.00      1S   
ATOM   3526 HA   LEU   240     -11.025   7.850 -40.208  1.00  0.00      1S   
ATOM   3527 CB   LEU   240     -12.204   9.355 -39.187  1.00  1.00      1S   
ATOM   3528 HB1  LEU   240     -12.653  10.340 -39.438  1.00  0.00      1S   
ATOM   3529 HB2  LEU   240     -11.423   9.538 -38.416  1.00  0.00      1S   
ATOM   3530 CG   LEU   240     -13.301   8.456 -38.561  1.00  1.00      1S   
ATOM   3531 HG   LEU   240     -14.029   8.182 -39.359  1.00  0.00      1S   
ATOM   3532 CD1  LEU   240     -12.727   7.146 -37.990  1.00  1.00      1S   
ATOM   3533 HD11 LEU   240     -11.984   7.365 -37.195  1.00  0.00      1S   
ATOM   3534 HD12 LEU   240     -12.233   6.550 -38.786  1.00  0.00      1S   
ATOM   3535 HD13 LEU   240     -13.540   6.531 -37.551  1.00  0.00      1S   
ATOM   3536 CD2  LEU   240     -14.106   9.218 -37.491  1.00  1.00      1S   
ATOM   3537 HD21 LEU   240     -14.570  10.126 -37.931  1.00  0.00      1S   
ATOM   3538 HD22 LEU   240     -13.443   9.526 -36.655  1.00  0.00      1S   
ATOM   3539 HD23 LEU   240     -14.913   8.572 -37.085  1.00  0.00      1S   
ATOM   3540 C    LEU   240     -12.558   8.507 -41.509  1.00  1.00      1S   
ATOM   3541 O    LEU   240     -12.904   7.357 -41.760  1.00  1.00      1S   
ATOM   3542 N    HSE   241     -13.041   9.573 -42.186  1.00  1.00      1S   
ATOM   3543 HN   HSE   241     -12.734  10.492 -41.938  1.00  0.00      1S   
ATOM   3544 CA   HSE   241     -13.995   9.539 -43.271  1.00  1.00      1S   
ATOM   3545 HA   HSE   241     -14.902   9.089 -42.892  1.00  0.00      1S   
ATOM   3546 CB   HSE   241     -14.311  10.977 -43.767  1.00  1.00      1S   
ATOM   3547 HB1  HSE   241     -13.375  11.473 -44.100  1.00  0.00      1S   
ATOM   3548 HB2  HSE   241     -14.699  11.557 -42.901  1.00  0.00      1S   
ATOM   3549 ND1  HSE   241     -15.012  10.741 -46.172  1.00  1.00      1S   
ATOM   3550 CG   HSE   241     -15.332  11.093 -44.870  1.00  1.00      1S   
ATOM   3551 CE1  HSE   241     -16.106  10.977 -46.865  1.00  1.00      1S   
ATOM   3552 HE1  HSE   241     -16.218  10.806 -47.935  1.00  0.00      1S   
ATOM   3553 NE2  HSE   241     -17.101  11.467 -46.089  1.00  1.00      1S   
ATOM   3554 HE2  HSE   241     -18.022  11.743 -46.378  1.00  0.00      1S   
ATOM   3555 CD2  HSE   241     -16.611  11.546 -44.806  1.00  1.00      1S   
ATOM   3556 HD2  HSE   241     -17.182  11.918 -43.967  1.00  0.00      1S   
ATOM   3557 C    HSE   241     -13.502   8.694 -44.420  1.00  1.00      1S   
ATOM   3558 O    HSE   241     -14.245   7.859 -44.927  1.00  1.00      1S   
ATOM   3559 N    ALA   242     -12.230   8.877 -44.849  1.00  1.00      1S   
ATOM   3560 HN   ALA   242     -11.639   9.561 -44.424  1.00  0.00      1S   
ATOM   3561 CA   ALA   242     -11.658   8.177 -45.978  1.00  1.00      1S   
ATOM   3562 HA   ALA   242     -12.342   8.289 -46.808  1.00  0.00      1S   
ATOM   3563 CB   ALA   242     -10.295   8.762 -46.387  1.00  1.00      1S   
ATOM   3564 HB1  ALA   242      -9.571   8.706 -45.548  1.00  0.00      1S   
ATOM   3565 HB2  ALA   242     -10.418   9.829 -46.667  1.00  0.00      1S   
ATOM   3566 HB3  ALA   242      -9.875   8.219 -47.261  1.00  0.00      1S   
ATOM   3567 C    ALA   242     -11.494   6.700 -45.709  1.00  1.00      1S   
ATOM   3568 O    ALA   242     -11.745   5.881 -46.591  1.00  1.00      1S   
ATOM   3569 N    TYR   243     -11.109   6.324 -44.466  1.00  1.00      1S   
ATOM   3570 HN   TYR   243     -10.888   7.004 -43.769  1.00  0.00      1S   
ATOM   3571 CA   TYR   243     -11.009   4.944 -44.038  1.00  1.00      1S   
ATOM   3572 HA   TYR   243     -10.387   4.422 -44.753  1.00  0.00      1S   
ATOM   3573 CB   TYR   243     -10.360   4.838 -42.631  1.00  1.00      1S   
ATOM   3574 HB1  TYR   243     -10.900   5.491 -41.912  1.00  0.00      1S   
ATOM   3575 HB2  TYR   243      -9.306   5.185 -42.690  1.00  0.00      1S   
ATOM   3576 CG   TYR   243     -10.346   3.428 -42.089  1.00  1.00      1S   
ATOM   3577 CD1  TYR   243      -9.519   2.447 -42.659  1.00  1.00      1S   
ATOM   3578 HD1  TYR   243      -8.855   2.707 -43.471  1.00  0.00      1S   
ATOM   3579 CE1  TYR   243      -9.561   1.128 -42.194  1.00  1.00      1S   
ATOM   3580 HE1  TYR   243      -8.925   0.379 -42.644  1.00  0.00      1S   
ATOM   3581 CZ   TYR   243     -10.436   0.778 -41.158  1.00  1.00      1S   
ATOM   3582 OH   TYR   243     -10.484  -0.560 -40.718  1.00  1.00      1S   
ATOM   3583 HH   TYR   243     -11.200  -0.634 -40.077  1.00  0.00      1S   
ATOM   3584 CD2  TYR   243     -11.218   3.069 -41.046  1.00  1.00      1S   
ATOM   3585 HD2  TYR   243     -11.873   3.810 -40.614  1.00  0.00      1S   
ATOM   3586 CE2  TYR   243     -11.262   1.751 -40.579  1.00  1.00      1S   
ATOM   3587 HE2  TYR   243     -11.940   1.499 -39.778  1.00  0.00      1S   
ATOM   3588 C    TYR   243     -12.376   4.293 -44.042  1.00  1.00      1S   
ATOM   3589 O    TYR   243     -12.536   3.208 -44.593  1.00  1.00      1S   
ATOM   3590 N    VAL   244     -13.391   4.956 -43.442  1.00  1.00      1S   
ATOM   3591 HN   VAL   244     -13.234   5.848 -43.020  1.00  0.00      1S   
ATOM   3592 CA   VAL   244     -14.746   4.453 -43.324  1.00  1.00      1S   
ATOM   3593 HA   VAL   244     -14.688   3.473 -42.869  1.00  0.00      1S   
ATOM   3594 CB   VAL   244     -15.599   5.350 -42.431  1.00  1.00      1S   
ATOM   3595 HB   VAL   244     -15.421   6.416 -42.699  1.00  0.00      1S   
ATOM   3596 CG1  VAL   244     -17.109   5.064 -42.579  1.00  1.00      1S   
ATOM   3597 HG11 VAL   244     -17.315   3.981 -42.452  1.00  0.00      1S   
ATOM   3598 HG12 VAL   244     -17.482   5.389 -43.573  1.00  0.00      1S   
ATOM   3599 HG13 VAL   244     -17.676   5.625 -41.806  1.00  0.00      1S   
ATOM   3600 CG2  VAL   244     -15.150   5.126 -40.970  1.00  1.00      1S   
ATOM   3601 HG21 VAL   244     -14.073   5.352 -40.839  1.00  0.00      1S   
ATOM   3602 HG22 VAL   244     -15.323   4.070 -40.673  1.00  0.00      1S   
ATOM   3603 HG23 VAL   244     -15.732   5.781 -40.288  1.00  0.00      1S   
ATOM   3604 C    VAL   244     -15.363   4.265 -44.689  1.00  1.00      1S   
ATOM   3605 O    VAL   244     -15.998   3.246 -44.940  1.00  1.00      1S   
ATOM   3606 N    ARG   245     -15.140   5.215 -45.624  1.00  1.00      1S   
ATOM   3607 HN   ARG   245     -14.631   6.045 -45.396  1.00  0.00      1S   
ATOM   3608 CA   ARG   245     -15.604   5.136 -46.990  1.00  1.00      1S   
ATOM   3609 HA   ARG   245     -16.677   5.014 -46.966  1.00  0.00      1S   
ATOM   3610 CB   ARG   245     -15.251   6.410 -47.783  1.00  1.00      1S   
ATOM   3611 HB1  ARG   245     -14.156   6.585 -47.705  1.00  0.00      1S   
ATOM   3612 HB2  ARG   245     -15.758   7.275 -47.299  1.00  0.00      1S   
ATOM   3613 CG   ARG   245     -15.667   6.369 -49.267  1.00  1.00      1S   
ATOM   3614 HG1  ARG   245     -16.742   6.088 -49.332  1.00  0.00      1S   
ATOM   3615 HG2  ARG   245     -15.080   5.590 -49.803  1.00  0.00      1S   
ATOM   3616 CD   ARG   245     -15.472   7.703 -49.984  1.00  1.00      1S   
ATOM   3617 HD1  ARG   245     -16.149   8.464 -49.541  1.00  0.00      1S   
ATOM   3618 HD2  ARG   245     -15.663   7.609 -51.072  1.00  0.00      1S   
ATOM   3619 NE   ARG   245     -14.050   8.120 -49.792  1.00  1.00      1S   
ATOM   3620 HE   ARG   245     -13.387   7.450 -49.473  1.00  0.00      1S   
ATOM   3621 CZ   ARG   245     -13.649   9.407 -49.954  1.00  1.00      1S   
ATOM   3622 NH1  ARG   245     -12.362   9.745 -49.693  1.00  1.00      1S   
ATOM   3623 HH11 ARG   245     -11.684   9.055 -49.454  1.00  0.00      1S   
ATOM   3624 HH12 ARG   245     -12.090  10.705 -49.810  1.00  0.00      1S   
ATOM   3625 NH2  ARG   245     -14.512  10.371 -50.372  1.00  1.00      1S   
ATOM   3626 HH21 ARG   245     -15.469  10.139 -50.565  1.00  0.00      1S   
ATOM   3627 HH22 ARG   245     -14.181  11.303 -50.485  1.00  0.00      1S   
ATOM   3628 C    ARG   245     -15.033   3.955 -47.724  1.00  1.00      1S   
ATOM   3629 O    ARG   245     -15.762   3.277 -48.439  1.00  1.00      1S   
ATOM   3630 N    ALA   246     -13.724   3.665 -47.552  1.00  1.00      1S   
ATOM   3631 HN   ALA   246     -13.142   4.229 -46.968  1.00  0.00      1S   
ATOM   3632 CA   ALA   246     -13.070   2.547 -48.194  1.00  1.00      1S   
ATOM   3633 HA   ALA   246     -13.270   2.615 -49.255  1.00  0.00      1S   
ATOM   3634 CB   ALA   246     -11.547   2.578 -47.972  1.00  1.00      1S   
ATOM   3635 HB1  ALA   246     -11.303   2.548 -46.890  1.00  0.00      1S   
ATOM   3636 HB2  ALA   246     -11.125   3.514 -48.398  1.00  0.00      1S   
ATOM   3637 HB3  ALA   246     -11.057   1.717 -48.476  1.00  0.00      1S   
ATOM   3638 C    ALA   246     -13.613   1.225 -47.700  1.00  1.00      1S   
ATOM   3639 O    ALA   246     -13.849   0.313 -48.490  1.00  1.00      1S   
ATOM   3640 N    LYS   247     -13.868   1.110 -46.376  1.00  1.00      1S   
ATOM   3641 HN   LYS   247     -13.661   1.859 -45.748  1.00  0.00      1S   
ATOM   3642 CA   LYS   247     -14.437  -0.074 -45.770  1.00  1.00      1S   
ATOM   3643 HA   LYS   247     -13.854  -0.923 -46.094  1.00  0.00      1S   
ATOM   3644 CB   LYS   247     -14.429   0.006 -44.227  1.00  1.00      1S   
ATOM   3645 HB1  LYS   247     -14.987  -0.857 -43.802  1.00  0.00      1S   
ATOM   3646 HB2  LYS   247     -14.960   0.934 -43.921  1.00  0.00      1S   
ATOM   3647 CG   LYS   247     -13.024   0.034 -43.599  1.00  1.00      1S   
ATOM   3648 HG1  LYS   247     -13.128   0.163 -42.499  1.00  0.00      1S   
ATOM   3649 HG2  LYS   247     -12.472   0.917 -43.980  1.00  0.00      1S   
ATOM   3650 CD   LYS   247     -12.164  -1.213 -43.865  1.00  1.00      1S   
ATOM   3651 HD1  LYS   247     -11.143  -1.004 -43.471  1.00  0.00      1S   
ATOM   3652 HD2  LYS   247     -12.068  -1.376 -44.960  1.00  0.00      1S   
ATOM   3653 CE   LYS   247     -12.707  -2.475 -43.187  1.00  1.00      1S   
ATOM   3654 HE1  LYS   247     -13.684  -2.770 -43.624  1.00  0.00      1S   
ATOM   3655 HE2  LYS   247     -12.829  -2.303 -42.096  1.00  0.00      1S   
ATOM   3656 NZ   LYS   247     -11.773  -3.610 -43.356  1.00  1.00      1S   
ATOM   3657 HZ1  LYS   247     -10.856  -3.368 -42.929  1.00  0.00      1S   
ATOM   3658 HZ2  LYS   247     -11.644  -3.809 -44.368  1.00  0.00      1S   
ATOM   3659 HZ3  LYS   247     -12.163  -4.451 -42.883  1.00  0.00      1S   
ATOM   3660 C    LYS   247     -15.856  -0.309 -46.228  1.00  1.00      1S   
ATOM   3661 O    LYS   247     -16.222  -1.436 -46.558  1.00  1.00      1S   
ATOM   3662 N    LEU   248     -16.684   0.759 -46.294  1.00  1.00      1S   
ATOM   3663 HN   LEU   248     -16.383   1.669 -46.009  1.00  0.00      1S   
ATOM   3664 CA   LEU   248     -18.049   0.665 -46.756  1.00  1.00      1S   
ATOM   3665 HA   LEU   248     -18.509  -0.180 -46.264  1.00  0.00      1S   
ATOM   3666 CB   LEU   248     -18.882   1.935 -46.471  1.00  1.00      1S   
ATOM   3667 HB1  LEU   248     -19.874   1.831 -46.966  1.00  0.00      1S   
ATOM   3668 HB2  LEU   248     -18.366   2.815 -46.916  1.00  0.00      1S   
ATOM   3669 CG   LEU   248     -19.176   2.232 -44.984  1.00  1.00      1S   
ATOM   3670 HG   LEU   248     -18.209   2.393 -44.458  1.00  0.00      1S   
ATOM   3671 CD1  LEU   248     -19.991   3.534 -44.871  1.00  1.00      1S   
ATOM   3672 HD11 LEU   248     -20.956   3.432 -45.412  1.00  0.00      1S   
ATOM   3673 HD12 LEU   248     -19.423   4.377 -45.315  1.00  0.00      1S   
ATOM   3674 HD13 LEU   248     -20.204   3.772 -43.808  1.00  0.00      1S   
ATOM   3675 CD2  LEU   248     -19.896   1.071 -44.274  1.00  1.00      1S   
ATOM   3676 HD21 LEU   248     -19.263   0.159 -44.264  1.00  0.00      1S   
ATOM   3677 HD22 LEU   248     -20.852   0.838 -44.788  1.00  0.00      1S   
ATOM   3678 HD23 LEU   248     -20.116   1.347 -43.221  1.00  0.00      1S   
ATOM   3679 C    LEU   248     -18.124   0.401 -48.238  1.00  1.00      1S   
ATOM   3680 O    LEU   248     -19.063  -0.244 -48.688  1.00  1.00      1S   
ATOM   3681 N    MET   249     -17.138   0.865 -49.040  1.00  1.00      1S   
ATOM   3682 HN   MET   249     -16.392   1.418 -48.674  1.00  0.00      1S   
ATOM   3683 CA   MET   249     -17.108   0.646 -50.469  1.00  1.00      1S   
ATOM   3684 HA   MET   249     -18.077   0.925 -50.862  1.00  0.00      1S   
ATOM   3685 CB   MET   249     -16.032   1.499 -51.174  1.00  1.00      1S   
ATOM   3686 HB1  MET   249     -15.023   1.154 -50.859  1.00  0.00      1S   
ATOM   3687 HB2  MET   249     -16.145   2.552 -50.835  1.00  0.00      1S   
ATOM   3688 CG   MET   249     -16.152   1.489 -52.709  1.00  1.00      1S   
ATOM   3689 HG1  MET   249     -17.191   1.792 -52.967  1.00  0.00      1S   
ATOM   3690 HG2  MET   249     -16.014   0.451 -53.081  1.00  0.00      1S   
ATOM   3691 SD   MET   249     -14.988   2.590 -53.561  1.00  1.00      1S   
ATOM   3692 CE   MET   249     -13.443   1.799 -53.022  1.00  1.00      1S   
ATOM   3693 HE1  MET   249     -13.473   0.702 -53.197  1.00  0.00      1S   
ATOM   3694 HE2  MET   249     -13.257   1.971 -51.941  1.00  0.00      1S   
ATOM   3695 HE3  MET   249     -12.574   2.210 -53.580  1.00  0.00      1S   
ATOM   3696 C    MET   249     -16.868  -0.809 -50.788  1.00  1.00      1S   
ATOM   3697 O    MET   249     -17.441  -1.343 -51.731  1.00  1.00      1S   
ATOM   3698 N    ASN   250     -16.049  -1.513 -49.973  1.00  1.00      1S   
ATOM   3699 HN   ASN   250     -15.559  -1.068 -49.226  1.00  0.00      1S   
ATOM   3700 CA   ASN   250     -15.825  -2.939 -50.121  1.00  1.00      1S   
ATOM   3701 HA   ASN   250     -15.511  -3.123 -51.140  1.00  0.00      1S   
ATOM   3702 CB   ASN   250     -14.751  -3.469 -49.135  1.00  1.00      1S   
ATOM   3703 HB1  ASN   250     -14.719  -4.580 -49.164  1.00  0.00      1S   
ATOM   3704 HB2  ASN   250     -14.999  -3.147 -48.102  1.00  0.00      1S   
ATOM   3705 CG   ASN   250     -13.358  -2.953 -49.519  1.00  1.00      1S   
ATOM   3706 OD1  ASN   250     -13.122  -2.476 -50.633  1.00  1.00      1S   
ATOM   3707 ND2  ASN   250     -12.396  -3.081 -48.556  1.00  1.00      1S   
ATOM   3708 HD21 ASN   250     -11.465  -2.785 -48.756  1.00  0.00      1S   
ATOM   3709 HD22 ASN   250     -12.627  -3.485 -47.671  1.00  0.00      1S   
ATOM   3710 C    ASN   250     -17.100  -3.733 -49.900  1.00  1.00      1S   
ATOM   3711 O    ASN   250     -17.314  -4.752 -50.554  1.00  1.00      1S   
ATOM   3712 N    ALA   251     -17.985  -3.267 -48.987  1.00  1.00      1S   
ATOM   3713 HN   ALA   251     -17.804  -2.427 -48.481  1.00  0.00      1S   
ATOM   3714 CA   ALA   251     -19.221  -3.942 -48.656  1.00  1.00      1S   
ATOM   3715 HA   ALA   251     -19.071  -5.008 -48.761  1.00  0.00      1S   
ATOM   3716 CB   ALA   251     -19.640  -3.655 -47.203  1.00  1.00      1S   
ATOM   3717 HB1  ALA   251     -19.782  -2.566 -47.037  1.00  0.00      1S   
ATOM   3718 HB2  ALA   251     -18.848  -4.013 -46.510  1.00  0.00      1S   
ATOM   3719 HB3  ALA   251     -20.584  -4.184 -46.951  1.00  0.00      1S   
ATOM   3720 C    ALA   251     -20.359  -3.546 -49.571  1.00  1.00      1S   
ATOM   3721 O    ALA   251     -21.265  -4.345 -49.804  1.00  1.00      1S   
ATOM   3722 N    TYR   252     -20.347  -2.307 -50.113  1.00  1.00      1S   
ATOM   3723 HN   TYR   252     -19.613  -1.661 -49.906  1.00  0.00      1S   
ATOM   3724 CA   TYR   252     -21.388  -1.811 -50.989  1.00  1.00      1S   
ATOM   3725 HA   TYR   252     -22.054  -2.610 -51.288  1.00  0.00      1S   
ATOM   3726 CB   TYR   252     -22.210  -0.685 -50.312  1.00  1.00      1S   
ATOM   3727 HB1  TYR   252     -22.976  -0.287 -51.001  1.00  0.00      1S   
ATOM   3728 HB2  TYR   252     -21.544   0.145 -50.004  1.00  0.00      1S   
ATOM   3729 CG   TYR   252     -22.923  -1.179 -49.090  1.00  1.00      1S   
ATOM   3730 CD1  TYR   252     -24.129  -1.892 -49.200  1.00  1.00      1S   
ATOM   3731 HD1  TYR   252     -24.548  -2.095 -50.174  1.00  0.00      1S   
ATOM   3732 CE1  TYR   252     -24.793  -2.343 -48.052  1.00  1.00      1S   
ATOM   3733 HE1  TYR   252     -25.720  -2.890 -48.151  1.00  0.00      1S   
ATOM   3734 CZ   TYR   252     -24.245  -2.085 -46.787  1.00  1.00      1S   
ATOM   3735 OH   TYR   252     -24.873  -2.528 -45.612  1.00  1.00      1S   
ATOM   3736 HH   TYR   252     -25.673  -3.002 -45.868  1.00  0.00      1S   
ATOM   3737 CD2  TYR   252     -22.395  -0.919 -47.815  1.00  1.00      1S   
ATOM   3738 HD2  TYR   252     -21.472  -0.368 -47.715  1.00  0.00      1S   
ATOM   3739 CE2  TYR   252     -23.048  -1.375 -46.668  1.00  1.00      1S   
ATOM   3740 HE2  TYR   252     -22.626  -1.176 -45.694  1.00  0.00      1S   
ATOM   3741 C    TYR   252     -20.755  -1.226 -52.237  1.00  1.00      1S   
ATOM   3742 O    TYR   252     -20.792  -0.005 -52.400  1.00  1.00      1S   
ATOM   3743 N    PRO   253     -20.177  -2.006 -53.159  1.00  1.00      1S   
ATOM   3744 CD   PRO   253     -19.990  -3.450 -53.014  1.00  1.00      1S   
ATOM   3745 HD1  PRO   253     -20.937  -3.960 -52.738  1.00  0.00      1S   
ATOM   3746 HD2  PRO   253     -19.212  -3.626 -52.239  1.00  0.00      1S   
ATOM   3747 CA   PRO   253     -19.333  -1.467 -54.220  1.00  1.00      1S   
ATOM   3748 HA   PRO   253     -18.620  -0.783 -53.784  1.00  0.00      1S   
ATOM   3749 CB   PRO   253     -18.654  -2.701 -54.850  1.00  1.00      1S   
ATOM   3750 HB1  PRO   253     -17.621  -2.784 -54.446  1.00  0.00      1S   
ATOM   3751 HB2  PRO   253     -18.600  -2.663 -55.957  1.00  0.00      1S   
ATOM   3752 CG   PRO   253     -19.471  -3.907 -54.371  1.00  1.00      1S   
ATOM   3753 HG1  PRO   253     -20.330  -4.078 -55.056  1.00  0.00      1S   
ATOM   3754 HG2  PRO   253     -18.861  -4.830 -54.300  1.00  0.00      1S   
ATOM   3755 C    PRO   253     -20.103  -0.697 -55.258  1.00  1.00      1S   
ATOM   3756 O    PRO   253     -19.498   0.139 -55.926  1.00  1.00      1S   
ATOM   3757 N    SER   254     -21.419  -0.953 -55.419  1.00  1.00      1S   
ATOM   3758 HN   SER   254     -21.888  -1.642 -54.871  1.00  0.00      1S   
ATOM   3759 CA   SER   254     -22.203  -0.312 -56.448  1.00  1.00      1S   
ATOM   3760 HA   SER   254     -21.541   0.007 -57.242  1.00  0.00      1S   
ATOM   3761 CB   SER   254     -23.226  -1.288 -57.090  1.00  1.00      1S   
ATOM   3762 HB1  SER   254     -22.692  -2.220 -57.377  1.00  0.00      1S   
ATOM   3763 HB2  SER   254     -23.652  -0.839 -58.014  1.00  0.00      1S   
ATOM   3764 OG   SER   254     -24.289  -1.641 -56.209  1.00  1.00      1S   
ATOM   3765 HG1  SER   254     -24.899  -0.897 -56.223  1.00  0.00      1S   
ATOM   3766 C    SER   254     -22.912   0.919 -55.928  1.00  1.00      1S   
ATOM   3767 O    SER   254     -23.620   1.578 -56.686  1.00  1.00      1S   
ATOM   3768 N    TYR   255     -22.759   1.247 -54.623  1.00  1.00      1S   
ATOM   3769 HN   TYR   255     -22.164   0.719 -54.020  1.00  0.00      1S   
ATOM   3770 CA   TYR   255     -23.519   2.309 -54.000  1.00  1.00      1S   
ATOM   3771 HA   TYR   255     -24.211   2.744 -54.708  1.00  0.00      1S   
ATOM   3772 CB   TYR   255     -24.314   1.801 -52.773  1.00  1.00      1S   
ATOM   3773 HB1  TYR   255     -24.792   2.650 -52.241  1.00  0.00      1S   
ATOM   3774 HB2  TYR   255     -23.634   1.287 -52.065  1.00  0.00      1S   
ATOM   3775 CG   TYR   255     -25.426   0.863 -53.176  1.00  1.00      1S   
ATOM   3776 CD1  TYR   255     -26.508   1.334 -53.942  1.00  1.00      1S   
ATOM   3777 HD1  TYR   255     -26.523   2.361 -54.276  1.00  0.00      1S   
ATOM   3778 CE1  TYR   255     -27.596   0.501 -54.235  1.00  1.00      1S   
ATOM   3779 HE1  TYR   255     -28.428   0.890 -54.803  1.00  0.00      1S   
ATOM   3780 CZ   TYR   255     -27.613  -0.818 -53.765  1.00  1.00      1S   
ATOM   3781 OH   TYR   255     -28.723  -1.651 -54.018  1.00  1.00      1S   
ATOM   3782 HH   TYR   255     -29.384  -1.131 -54.480  1.00  0.00      1S   
ATOM   3783 CD2  TYR   255     -25.449  -0.470 -52.731  1.00  1.00      1S   
ATOM   3784 HD2  TYR   255     -24.636  -0.856 -52.140  1.00  0.00      1S   
ATOM   3785 CE2  TYR   255     -26.534  -1.306 -53.019  1.00  1.00      1S   
ATOM   3786 HE2  TYR   255     -26.542  -2.321 -52.650  1.00  0.00      1S   
ATOM   3787 C    TYR   255     -22.637   3.437 -53.524  1.00  1.00      1S   
ATOM   3788 O    TYR   255     -23.159   4.485 -53.148  1.00  1.00      1S   
ATOM   3789 N    ILE   256     -21.294   3.262 -53.501  1.00  1.00      1S   
ATOM   3790 HN   ILE   256     -20.870   2.428 -53.847  1.00  0.00      1S   
ATOM   3791 CA   ILE   256     -20.386   4.233 -52.920  1.00  1.00      1S   
ATOM   3792 HA   ILE   256     -20.902   5.166 -52.734  1.00  0.00      1S   
ATOM   3793 CB   ILE   256     -19.810   3.731 -51.595  1.00  1.00      1S   
ATOM   3794 HB   ILE   256     -19.574   2.648 -51.713  1.00  0.00      1S   
ATOM   3795 CG2  ILE   256     -18.508   4.456 -51.179  1.00  1.00      1S   
ATOM   3796 HG21 ILE   256     -18.658   5.556 -51.171  1.00  0.00      1S   
ATOM   3797 HG22 ILE   256     -17.676   4.213 -51.873  1.00  0.00      1S   
ATOM   3798 HG23 ILE   256     -18.196   4.137 -50.163  1.00  0.00      1S   
ATOM   3799 CG1  ILE   256     -20.887   3.873 -50.494  1.00  1.00      1S   
ATOM   3800 HG11 ILE   256     -21.893   3.668 -50.916  1.00  0.00      1S   
ATOM   3801 HG12 ILE   256     -20.888   4.920 -50.120  1.00  0.00      1S   
ATOM   3802 CD   ILE   256     -20.665   2.914 -49.332  1.00  1.00      1S   
ATOM   3803 HD1  ILE   256     -19.734   3.180 -48.790  1.00  0.00      1S   
ATOM   3804 HD2  ILE   256     -20.559   1.878 -49.712  1.00  0.00      1S   
ATOM   3805 HD3  ILE   256     -21.518   2.948 -48.622  1.00  0.00      1S   
ATOM   3806 C    ILE   256     -19.304   4.523 -53.925  1.00  1.00      1S   
ATOM   3807 O    ILE   256     -18.654   3.618 -54.444  1.00  1.00      1S   
ATOM   3808 N    SER   257     -19.086   5.834 -54.199  1.00  1.00      1S   
ATOM   3809 HN   SER   257     -19.663   6.536 -53.790  1.00  0.00      1S   
ATOM   3810 CA   SER   257     -18.010   6.336 -55.026  1.00  1.00      1S   
ATOM   3811 HA   SER   257     -17.895   5.658 -55.858  1.00  0.00      1S   
ATOM   3812 CB   SER   257     -18.352   7.760 -55.564  1.00  1.00      1S   
ATOM   3813 HB1  SER   257     -18.832   8.355 -54.758  1.00  0.00      1S   
ATOM   3814 HB2  SER   257     -19.079   7.650 -56.395  1.00  0.00      1S   
ATOM   3815 OG   SER   257     -17.234   8.493 -56.058  1.00  1.00      1S   
ATOM   3816 HG1  SER   257     -17.567   9.356 -56.317  1.00  0.00      1S   
ATOM   3817 C    SER   257     -16.742   6.385 -54.189  1.00  1.00      1S   
ATOM   3818 O    SER   257     -16.832   6.676 -52.997  1.00  1.00      1S   
ATOM   3819 N    PRO   258     -15.549   6.147 -54.745  1.00  1.00      1S   
ATOM   3820 CD   PRO   258     -15.357   5.642 -56.107  1.00  1.00      1S   
ATOM   3821 HD1  PRO   258     -15.912   6.258 -56.847  1.00  0.00      1S   
ATOM   3822 HD2  PRO   258     -15.706   4.587 -56.146  1.00  0.00      1S   
ATOM   3823 CA   PRO   258     -14.294   6.232 -54.010  1.00  1.00      1S   
ATOM   3824 HA   PRO   258     -14.397   5.707 -53.071  1.00  0.00      1S   
ATOM   3825 CB   PRO   258     -13.257   5.590 -54.952  1.00  1.00      1S   
ATOM   3826 HB1  PRO   258     -13.165   4.510 -54.707  1.00  0.00      1S   
ATOM   3827 HB2  PRO   258     -12.250   6.049 -54.886  1.00  0.00      1S   
ATOM   3828 CG   PRO   258     -13.853   5.723 -56.357  1.00  1.00      1S   
ATOM   3829 HG1  PRO   258     -13.602   6.721 -56.778  1.00  0.00      1S   
ATOM   3830 HG2  PRO   258     -13.497   4.930 -57.045  1.00  0.00      1S   
ATOM   3831 C    PRO   258     -13.897   7.661 -53.712  1.00  1.00      1S   
ATOM   3832 O    PRO   258     -12.963   7.846 -52.933  1.00  1.00      1S   
ATOM   3833 N    ILE   259     -14.558   8.671 -54.323  1.00  1.00      1S   
ATOM   3834 HN   ILE   259     -15.303   8.489 -54.962  1.00  0.00      1S   
ATOM   3835 CA   ILE   259     -14.192  10.061 -54.154  1.00  1.00      1S   
ATOM   3836 HA   ILE   259     -13.393  10.144 -53.431  1.00  0.00      1S   
ATOM   3837 CB   ILE   259     -13.726  10.716 -55.453  1.00  1.00      1S   
ATOM   3838 HB   ILE   259     -13.425  11.766 -55.226  1.00  0.00      1S   
ATOM   3839 CG2  ILE   259     -12.466   9.970 -55.946  1.00  1.00      1S   
ATOM   3840 HG21 ILE   259     -12.733   8.958 -56.317  1.00  0.00      1S   
ATOM   3841 HG22 ILE   259     -11.730   9.861 -55.122  1.00  0.00      1S   
ATOM   3842 HG23 ILE   259     -11.985  10.529 -56.775  1.00  0.00      1S   
ATOM   3843 CG1  ILE   259     -14.827  10.755 -56.543  1.00  1.00      1S   
ATOM   3844 HG11 ILE   259     -15.801  11.055 -56.100  1.00  0.00      1S   
ATOM   3845 HG12 ILE   259     -14.952   9.735 -56.966  1.00  0.00      1S   
ATOM   3846 CD   ILE   259     -14.524  11.744 -57.670  1.00  1.00      1S   
ATOM   3847 HD1  ILE   259     -13.580  11.479 -58.189  1.00  0.00      1S   
ATOM   3848 HD2  ILE   259     -14.430  12.773 -57.260  1.00  0.00      1S   
ATOM   3849 HD3  ILE   259     -15.350  11.740 -58.413  1.00  0.00      1S   
ATOM   3850 C    ILE   259     -15.352  10.852 -53.607  1.00  1.00      1S   
ATOM   3851 O    ILE   259     -15.222  12.054 -53.392  1.00  1.00      1S   
ATOM   3852 N    GLY   260     -16.524  10.217 -53.381  1.00  1.00      1S   
ATOM   3853 HN   GLY   260     -16.609   9.228 -53.483  1.00  0.00      1S   
ATOM   3854 CA   GLY   260     -17.742  10.937 -53.088  1.00  1.00      1S   
ATOM   3855 HA1  GLY   260     -18.546  10.385 -53.552  1.00  0.00      1S   
ATOM   3856 HA2  GLY   260     -17.672  11.954 -53.449  1.00  0.00      1S   
ATOM   3857 C    GLY   260     -18.008  10.973 -51.621  1.00  1.00      1S   
ATOM   3858 O    GLY   260     -17.298  10.383 -50.810  1.00  1.00      1S   
ATOM   3859 N    CYS   261     -19.095  11.671 -51.246  1.00  1.00      1S   
ATOM   3860 HN   CYS   261     -19.651  12.160 -51.913  1.00  0.00      1S   
ATOM   3861 CA   CYS   261     -19.568  11.730 -49.889  1.00  1.00      1S   
ATOM   3862 HA   CYS   261     -18.732  11.891 -49.221  1.00  0.00      1S   
ATOM   3863 CB   CYS   261     -20.604  12.861 -49.730  1.00  1.00      1S   
ATOM   3864 HB1  CYS   261     -21.087  12.793 -48.735  1.00  0.00      1S   
ATOM   3865 HB2  CYS   261     -21.393  12.708 -50.492  1.00  0.00      1S   
ATOM   3866 SG   CYS   261     -19.891  14.519 -49.946  1.00  1.00      1S   
ATOM   3867 HG1  CYS   261     -19.500  14.323 -51.197  1.00  0.00      1S   
ATOM   3868 C    CYS   261     -20.232  10.420 -49.538  1.00  1.00      1S   
ATOM   3869 O    CYS   261     -20.589   9.631 -50.411  1.00  1.00      1S   
ATOM   3870 N    LEU   262     -20.406  10.155 -48.227  1.00  1.00      1S   
ATOM   3871 HN   LEU   262     -20.110  10.797 -47.520  1.00  0.00      1S   
ATOM   3872 CA   LEU   262     -21.031   8.947 -47.751  1.00  1.00      1S   
ATOM   3873 HA   LEU   262     -20.682   8.126 -48.355  1.00  0.00      1S   
ATOM   3874 CB   LEU   262     -20.693   8.667 -46.271  1.00  1.00      1S   
ATOM   3875 HB1  LEU   262     -21.293   7.805 -45.901  1.00  0.00      1S   
ATOM   3876 HB2  LEU   262     -20.965   9.557 -45.661  1.00  0.00      1S   
ATOM   3877 CG   LEU   262     -19.203   8.345 -46.040  1.00  1.00      1S   
ATOM   3878 HG   LEU   262     -18.591   9.150 -46.508  1.00  0.00      1S   
ATOM   3879 CD1  LEU   262     -18.854   8.336 -44.540  1.00  1.00      1S   
ATOM   3880 HD11 LEU   262     -19.429   7.547 -44.012  1.00  0.00      1S   
ATOM   3881 HD12 LEU   262     -19.097   9.320 -44.085  1.00  0.00      1S   
ATOM   3882 HD13 LEU   262     -17.770   8.141 -44.399  1.00  0.00      1S   
ATOM   3883 CD2  LEU   262     -18.816   7.015 -46.706  1.00  1.00      1S   
ATOM   3884 HD21 LEU   262     -18.834   7.099 -47.812  1.00  0.00      1S   
ATOM   3885 HD22 LEU   262     -19.519   6.213 -46.399  1.00  0.00      1S   
ATOM   3886 HD23 LEU   262     -17.794   6.731 -46.389  1.00  0.00      1S   
ATOM   3887 C    LEU   262     -22.528   9.108 -47.857  1.00  1.00      1S   
ATOM   3888 O    LEU   262     -23.025  10.160 -47.461  1.00  1.00      1S   
ATOM   3889 N    PRO   263     -23.304   8.143 -48.350  1.00  1.00      1S   
ATOM   3890 CD   PRO   263     -22.819   7.048 -49.192  1.00  1.00      1S   
ATOM   3891 HD1  PRO   263     -22.450   6.235 -48.532  1.00  0.00      1S   
ATOM   3892 HD2  PRO   263     -22.012   7.390 -49.877  1.00  0.00      1S   
ATOM   3893 CA   PRO   263     -24.755   8.241 -48.377  1.00  1.00      1S   
ATOM   3894 HA   PRO   263     -25.024   9.139 -48.915  1.00  0.00      1S   
ATOM   3895 CB   PRO   263     -25.218   6.968 -49.099  1.00  1.00      1S   
ATOM   3896 HB1  PRO   263     -26.145   7.140 -49.683  1.00  0.00      1S   
ATOM   3897 HB2  PRO   263     -25.390   6.140 -48.377  1.00  0.00      1S   
ATOM   3898 CG   PRO   263     -24.036   6.594 -49.999  1.00  1.00      1S   
ATOM   3899 HG1  PRO   263     -24.006   5.512 -50.235  1.00  0.00      1S   
ATOM   3900 HG2  PRO   263     -24.088   7.178 -50.943  1.00  0.00      1S   
ATOM   3901 C    PRO   263     -25.300   8.314 -46.968  1.00  1.00      1S   
ATOM   3902 O    PRO   263     -24.844   7.556 -46.114  1.00  1.00      1S   
ATOM   3903 N    ALA   264     -26.239   9.253 -46.709  1.00  1.00      1S   
ATOM   3904 HN   ALA   264     -26.579   9.834 -47.447  1.00  0.00      1S   
ATOM   3905 CA   ALA   264     -26.660   9.657 -45.386  1.00  1.00      1S   
ATOM   3906 HA   ALA   264     -25.772   9.931 -44.837  1.00  0.00      1S   
ATOM   3907 CB   ALA   264     -27.613  10.868 -45.446  1.00  1.00      1S   
ATOM   3908 HB1  ALA   264     -28.568  10.598 -45.944  1.00  0.00      1S   
ATOM   3909 HB2  ALA   264     -27.144  11.693 -46.022  1.00  0.00      1S   
ATOM   3910 HB3  ALA   264     -27.837  11.243 -44.424  1.00  0.00      1S   
ATOM   3911 C    ALA   264     -27.347   8.560 -44.625  1.00  1.00      1S   
ATOM   3912 O    ALA   264     -27.303   8.520 -43.397  1.00  1.00      1S   
ATOM   3913 N    HSE   265     -27.982   7.625 -45.355  1.00  1.00      1S   
ATOM   3914 HN   HSE   265     -27.985   7.660 -46.353  1.00  0.00      1S   
ATOM   3915 CA   HSE   265     -28.715   6.533 -44.780  1.00  1.00      1S   
ATOM   3916 HA   HSE   265     -29.192   6.888 -43.877  1.00  0.00      1S   
ATOM   3917 CB   HSE   265     -29.829   6.045 -45.738  1.00  1.00      1S   
ATOM   3918 HB1  HSE   265     -30.452   6.918 -46.030  1.00  0.00      1S   
ATOM   3919 HB2  HSE   265     -30.490   5.330 -45.202  1.00  0.00      1S   
ATOM   3920 ND1  HSE   265     -28.616   6.078 -47.941  1.00  1.00      1S   
ATOM   3921 CG   HSE   265     -29.353   5.381 -46.999  1.00  1.00      1S   
ATOM   3922 CE1  HSE   265     -28.399   5.209 -48.907  1.00  1.00      1S   
ATOM   3923 HE1  HSE   265     -27.847   5.415 -49.822  1.00  0.00      1S   
ATOM   3924 NE2  HSE   265     -28.949   4.001 -48.635  1.00  1.00      1S   
ATOM   3925 HE2  HSE   265     -28.917   3.181 -49.211  1.00  0.00      1S   
ATOM   3926 CD2  HSE   265     -29.559   4.105 -47.411  1.00  1.00      1S   
ATOM   3927 HD2  HSE   265     -30.074   3.290 -46.931  1.00  0.00      1S   
ATOM   3928 C    HSE   265     -27.836   5.360 -44.405  1.00  1.00      1S   
ATOM   3929 O    HSE   265     -28.361   4.370 -43.911  1.00  1.00      1S   
ATOM   3930 N    LEU   266     -26.496   5.425 -44.615  1.00  1.00      1S   
ATOM   3931 HN   LEU   266     -26.075   6.241 -45.009  1.00  0.00      1S   
ATOM   3932 CA   LEU   266     -25.592   4.317 -44.356  1.00  1.00      1S   
ATOM   3933 HA   LEU   266     -26.148   3.443 -44.055  1.00  0.00      1S   
ATOM   3934 CB   LEU   266     -24.741   3.972 -45.607  1.00  1.00      1S   
ATOM   3935 HB1  LEU   266     -24.018   3.162 -45.361  1.00  0.00      1S   
ATOM   3936 HB2  LEU   266     -24.158   4.869 -45.912  1.00  0.00      1S   
ATOM   3937 CG   LEU   266     -25.552   3.480 -46.827  1.00  1.00      1S   
ATOM   3938 HG   LEU   266     -26.230   4.304 -47.151  1.00  0.00      1S   
ATOM   3939 CD1  LEU   266     -24.607   3.167 -48.002  1.00  1.00      1S   
ATOM   3940 HD11 LEU   266     -23.891   2.367 -47.720  1.00  0.00      1S   
ATOM   3941 HD12 LEU   266     -24.032   4.073 -48.288  1.00  0.00      1S   
ATOM   3942 HD13 LEU   266     -25.186   2.824 -48.881  1.00  0.00      1S   
ATOM   3943 CD2  LEU   266     -26.429   2.261 -46.485  1.00  1.00      1S   
ATOM   3944 HD21 LEU   266     -27.251   2.553 -45.800  1.00  0.00      1S   
ATOM   3945 HD22 LEU   266     -25.818   1.473 -45.996  1.00  0.00      1S   
ATOM   3946 HD23 LEU   266     -26.883   1.840 -47.405  1.00  0.00      1S   
ATOM   3947 C    LEU   266     -24.633   4.633 -43.232  1.00  1.00      1S   
ATOM   3948 O    LEU   266     -23.467   4.244 -43.290  1.00  1.00      1S   
ATOM   3949 N    LEU   267     -25.085   5.343 -42.170  1.00  1.00      1S   
ATOM   3950 HN   LEU   267     -26.032   5.644 -42.107  1.00  0.00      1S   
ATOM   3951 CA   LEU   267     -24.173   5.879 -41.178  1.00  1.00      1S   
ATOM   3952 HA   LEU   267     -23.157   5.614 -41.424  1.00  0.00      1S   
ATOM   3953 CB   LEU   267     -24.261   7.413 -41.126  1.00  1.00      1S   
ATOM   3954 HB1  LEU   267     -23.625   7.806 -40.301  1.00  0.00      1S   
ATOM   3955 HB2  LEU   267     -25.314   7.708 -40.923  1.00  0.00      1S   
ATOM   3956 CG   LEU   267     -23.794   8.088 -42.433  1.00  1.00      1S   
ATOM   3957 HG   LEU   267     -24.417   7.697 -43.271  1.00  0.00      1S   
ATOM   3958 CD1  LEU   267     -24.031   9.603 -42.372  1.00  1.00      1S   
ATOM   3959 HD11 LEU   267     -23.433  10.055 -41.552  1.00  0.00      1S   
ATOM   3960 HD12 LEU   267     -25.106   9.818 -42.194  1.00  0.00      1S   
ATOM   3961 HD13 LEU   267     -23.734  10.067 -43.334  1.00  0.00      1S   
ATOM   3962 CD2  LEU   267     -22.321   7.770 -42.759  1.00  1.00      1S   
ATOM   3963 HD21 LEU   267     -22.197   6.702 -43.033  1.00  0.00      1S   
ATOM   3964 HD22 LEU   267     -21.676   7.987 -41.882  1.00  0.00      1S   
ATOM   3965 HD23 LEU   267     -21.977   8.387 -43.613  1.00  0.00      1S   
ATOM   3966 C    LEU   267     -24.384   5.338 -39.793  1.00  1.00      1S   
ATOM   3967 O    LEU   267     -23.652   5.705 -38.877  1.00  1.00      1S   
ATOM   3968 N    GLY   268     -25.352   4.422 -39.595  1.00  1.00      1S   
ATOM   3969 HN   GLY   268     -25.950   4.127 -40.335  1.00  0.00      1S   
ATOM   3970 CA   GLY   268     -25.457   3.703 -38.347  1.00  1.00      1S   
ATOM   3971 HA1  GLY   268     -24.518   3.743 -37.811  1.00  0.00      1S   
ATOM   3972 HA2  GLY   268     -25.731   2.691 -38.604  1.00  0.00      1S   
ATOM   3973 C    GLY   268     -26.525   4.234 -37.442  1.00  1.00      1S   
ATOM   3974 O    GLY   268     -26.855   3.587 -36.457  1.00  1.00      1S   
ATOM   3975 N    ASP   269     -27.128   5.400 -37.737  1.00  1.00      1S   
ATOM   3976 HN   ASP   269     -26.847   5.972 -38.503  1.00  0.00      1S   
ATOM   3977 CA   ASP   269     -28.339   5.785 -37.054  1.00  1.00      1S   
ATOM   3978 HA   ASP   269     -28.922   4.888 -36.888  1.00  0.00      1S   
ATOM   3979 CB   ASP   269     -28.147   6.455 -35.653  1.00  1.00      1S   
ATOM   3980 HB1  ASP   269     -27.574   5.743 -35.017  1.00  0.00      1S   
ATOM   3981 HB2  ASP   269     -29.135   6.599 -35.169  1.00  0.00      1S   
ATOM   3982 CG   ASP   269     -27.403   7.793 -35.639  1.00  1.00      1S   
ATOM   3983 OD1  ASP   269     -27.606   8.607 -36.573  1.00  1.00      1S   
ATOM   3984 OD2  ASP   269     -26.653   8.040 -34.658  1.00  1.00      1S   
ATOM   3985 C    ASP   269     -29.133   6.587 -38.045  1.00  1.00      1S   
ATOM   3986 O    ASP   269     -28.791   6.632 -39.227  1.00  1.00      1S   
ATOM   3987 N    MET   270     -30.241   7.218 -37.592  1.00  1.00      1S   
ATOM   3988 HN   MET   270     -30.479   7.205 -36.624  1.00  0.00      1S   
ATOM   3989 CA   MET   270     -31.201   7.863 -38.458  1.00  1.00      1S   
ATOM   3990 HA   MET   270     -31.445   7.159 -39.238  1.00  0.00      1S   
ATOM   3991 CB   MET   270     -32.508   8.195 -37.683  1.00  1.00      1S   
ATOM   3992 HB1  MET   270     -32.257   8.844 -36.820  1.00  0.00      1S   
ATOM   3993 HB2  MET   270     -32.914   7.245 -37.267  1.00  0.00      1S   
ATOM   3994 CG   MET   270     -33.632   8.883 -38.487  1.00  1.00      1S   
ATOM   3995 HG1  MET   270     -33.275   9.893 -38.784  1.00  0.00      1S   
ATOM   3996 HG2  MET   270     -34.499   9.047 -37.809  1.00  0.00      1S   
ATOM   3997 SD   MET   270     -34.171   7.975 -39.968  1.00  1.00      1S   
ATOM   3998 CE   MET   270     -35.483   7.007 -39.187  1.00  1.00      1S   
ATOM   3999 HE1  MET   270     -36.261   7.667 -38.748  1.00  0.00      1S   
ATOM   4000 HE2  MET   270     -35.082   6.364 -38.374  1.00  0.00      1S   
ATOM   4001 HE3  MET   270     -35.979   6.352 -39.935  1.00  0.00      1S   
ATOM   4002 C    MET   270     -30.628   9.087 -39.138  1.00  1.00      1S   
ATOM   4003 O    MET   270     -31.114   9.477 -40.195  1.00  1.00      1S   
ATOM   4004 N    TRP   271     -29.566   9.708 -38.573  1.00  1.00      1S   
ATOM   4005 HN   TRP   271     -29.121   9.334 -37.759  1.00  0.00      1S   
ATOM   4006 CA   TRP   271     -29.080  10.994 -39.026  1.00  1.00      1S   
ATOM   4007 HA   TRP   271     -29.610  11.301 -39.916  1.00  0.00      1S   
ATOM   4008 CB   TRP   271     -29.278  12.060 -37.922  1.00  1.00      1S   
ATOM   4009 HB1  TRP   271     -29.026  13.061 -38.335  1.00  0.00      1S   
ATOM   4010 HB2  TRP   271     -28.608  11.848 -37.062  1.00  0.00      1S   
ATOM   4011 CG   TRP   271     -30.705  12.111 -37.422  1.00  1.00      1S   
ATOM   4012 CD1  TRP   271     -31.762  12.780 -37.966  1.00  1.00      1S   
ATOM   4013 HD1  TRP   271     -31.698  13.466 -38.798  1.00  0.00      1S   
ATOM   4014 NE1  TRP   271     -32.915  12.466 -37.298  1.00  1.00      1S   
ATOM   4015 HE1  TRP   271     -33.806  12.826 -37.490  1.00  0.00      1S   
ATOM   4016 CE2  TRP   271     -32.617  11.615 -36.263  1.00  1.00      1S   
ATOM   4017 CD2  TRP   271     -31.229  11.361 -36.305  1.00  1.00      1S   
ATOM   4018 CE3  TRP   271     -30.624  10.514 -35.380  1.00  1.00      1S   
ATOM   4019 HE3  TRP   271     -29.568  10.294 -35.405  1.00  0.00      1S   
ATOM   4020 CZ3  TRP   271     -31.437   9.933 -34.393  1.00  1.00      1S   
ATOM   4021 HZ3  TRP   271     -30.997   9.271 -33.662  1.00  0.00      1S   
ATOM   4022 CZ2  TRP   271     -33.422  11.036 -35.288  1.00  1.00      1S   
ATOM   4023 HZ2  TRP   271     -34.485  11.218 -35.253  1.00  0.00      1S   
ATOM   4024 CH2  TRP   271     -32.816  10.195 -34.346  1.00  1.00      1S   
ATOM   4025 HH2  TRP   271     -33.419   9.733 -33.577  1.00  0.00      1S   
ATOM   4026 C    TRP   271     -27.618  10.957 -39.383  1.00  1.00      1S   
ATOM   4027 O    TRP   271     -27.108  11.883 -40.014  1.00  1.00      1S   
ATOM   4028 N    GLY   272     -26.890   9.905 -38.953  1.00  1.00      1S   
ATOM   4029 HN   GLY   272     -27.322   9.124 -38.504  1.00  0.00      1S   
ATOM   4030 CA   GLY   272     -25.447   9.890 -38.956  1.00  1.00      1S   
ATOM   4031 HA1  GLY   272     -25.091  10.265 -39.904  1.00  0.00      1S   
ATOM   4032 HA2  GLY   272     -25.138   8.878 -38.743  1.00  0.00      1S   
ATOM   4033 C    GLY   272     -24.914  10.768 -37.868  1.00  1.00      1S   
ATOM   4034 O    GLY   272     -23.856  11.377 -38.021  1.00  1.00      1S   
ATOM   4035 N    ARG   273     -25.643  10.841 -36.727  1.00  1.00      1S   
ATOM   4036 HN   ARG   273     -26.494  10.324 -36.634  1.00  0.00      1S   
ATOM   4037 CA   ARG   273     -25.256  11.623 -35.578  1.00  1.00      1S   
ATOM   4038 HA   ARG   273     -25.029  12.620 -35.919  1.00  0.00      1S   
ATOM   4039 CB   ARG   273     -26.359  11.712 -34.498  1.00  1.00      1S   
ATOM   4040 HB1  ARG   273     -26.628  10.693 -34.143  1.00  0.00      1S   
ATOM   4041 HB2  ARG   273     -27.267  12.161 -34.958  1.00  0.00      1S   
ATOM   4042 CG   ARG   273     -25.934  12.580 -33.301  1.00  1.00      1S   
ATOM   4043 HG1  ARG   273     -25.605  13.571 -33.684  1.00  0.00      1S   
ATOM   4044 HG2  ARG   273     -25.058  12.099 -32.808  1.00  0.00      1S   
ATOM   4045 CD   ARG   273     -27.024  12.779 -32.248  1.00  1.00      1S   
ATOM   4046 HD1  ARG   273     -27.353  11.797 -31.847  1.00  0.00      1S   
ATOM   4047 HD2  ARG   273     -27.891  13.336 -32.664  1.00  0.00      1S   
ATOM   4048 NE   ARG   273     -26.399  13.599 -31.159  1.00  1.00      1S   
ATOM   4049 HE   ARG   273     -25.606  14.156 -31.389  1.00  0.00      1S   
ATOM   4050 CZ   ARG   273     -26.831  13.604 -29.867  1.00  1.00      1S   
ATOM   4051 NH1  ARG   273     -26.174  14.372 -28.958  1.00  1.00      1S   
ATOM   4052 HH11 ARG   273     -25.403  14.936 -29.248  1.00  0.00      1S   
ATOM   4053 HH12 ARG   273     -26.472  14.386 -28.005  1.00  0.00      1S   
ATOM   4054 NH2  ARG   273     -27.888  12.849 -29.469  1.00  1.00      1S   
ATOM   4055 HH21 ARG   273     -28.356  12.274 -30.140  1.00  0.00      1S   
ATOM   4056 HH22 ARG   273     -28.159  12.838 -28.514  1.00  0.00      1S   
ATOM   4057 C    ARG   273     -24.007  11.037 -34.982  1.00  1.00      1S   
ATOM   4058 O    ARG   273     -23.057  11.761 -34.699  1.00  1.00      1S   
ATOM   4059 N    PHE   274     -23.978   9.699 -34.815  1.00  1.00      1S   
ATOM   4060 HN   PHE   274     -24.770   9.130 -35.038  1.00  0.00      1S   
ATOM   4061 CA   PHE   274     -22.802   8.988 -34.383  1.00  1.00      1S   
ATOM   4062 HA   PHE   274     -21.942   9.645 -34.377  1.00  0.00      1S   
ATOM   4063 CB   PHE   274     -22.971   8.308 -33.002  1.00  1.00      1S   
ATOM   4064 HB1  PHE   274     -21.998   7.896 -32.660  1.00  0.00      1S   
ATOM   4065 HB2  PHE   274     -23.708   7.477 -33.066  1.00  0.00      1S   
ATOM   4066 CG   PHE   274     -23.462   9.277 -31.956  1.00  1.00      1S   
ATOM   4067 CD1  PHE   274     -22.576  10.166 -31.326  1.00  1.00      1S   
ATOM   4068 HD1  PHE   274     -21.536  10.167 -31.606  1.00  0.00      1S   
ATOM   4069 CE1  PHE   274     -23.026  11.040 -30.328  1.00  1.00      1S   
ATOM   4070 HE1  PHE   274     -22.334  11.719 -29.851  1.00  0.00      1S   
ATOM   4071 CZ   PHE   274     -24.371  11.025 -29.943  1.00  1.00      1S   
ATOM   4072 HZ   PHE   274     -24.717  11.690 -29.166  1.00  0.00      1S   
ATOM   4073 CD2  PHE   274     -24.814   9.283 -31.570  1.00  1.00      1S   
ATOM   4074 HD2  PHE   274     -25.510   8.609 -32.050  1.00  0.00      1S   
ATOM   4075 CE2  PHE   274     -25.267  10.146 -30.565  1.00  1.00      1S   
ATOM   4076 HE2  PHE   274     -26.306  10.137 -30.274  1.00  0.00      1S   
ATOM   4077 C    PHE   274     -22.577   7.910 -35.410  1.00  1.00      1S   
ATOM   4078 O    PHE   274     -23.528   7.422 -36.019  1.00  1.00      1S   
ATOM   4079 N    TRP   275     -21.301   7.509 -35.631  1.00  1.00      1S   
ATOM   4080 HN   TRP   275     -20.530   7.929 -35.154  1.00  0.00      1S   
ATOM   4081 CA   TRP   275     -20.950   6.475 -36.588  1.00  1.00      1S   
ATOM   4082 HA   TRP   275     -21.785   6.281 -37.244  1.00  0.00      1S   
ATOM   4083 CB   TRP   275     -19.727   6.857 -37.461  1.00  1.00      1S   
ATOM   4084 HB1  TRP   275     -19.406   5.990 -38.075  1.00  0.00      1S   
ATOM   4085 HB2  TRP   275     -18.867   7.135 -36.820  1.00  0.00      1S   
ATOM   4086 CG   TRP   275     -19.981   7.985 -38.438  1.00  1.00      1S   
ATOM   4087 CD1  TRP   275     -21.130   8.694 -38.665  1.00  1.00      1S   
ATOM   4088 HD1  TRP   275     -22.069   8.553 -38.150  1.00  0.00      1S   
ATOM   4089 NE1  TRP   275     -20.937   9.610 -39.666  1.00  1.00      1S   
ATOM   4090 HE1  TRP   275     -21.601  10.254 -39.982  1.00  0.00      1S   
ATOM   4091 CE2  TRP   275     -19.648   9.492 -40.128  1.00  1.00      1S   
ATOM   4092 CD2  TRP   275     -19.008   8.481 -39.378  1.00  1.00      1S   
ATOM   4093 CE3  TRP   275     -17.681   8.133 -39.621  1.00  1.00      1S   
ATOM   4094 HE3  TRP   275     -17.174   7.363 -39.062  1.00  0.00      1S   
ATOM   4095 CZ3  TRP   275     -16.997   8.824 -40.635  1.00  1.00      1S   
ATOM   4096 HZ3  TRP   275     -15.966   8.580 -40.844  1.00  0.00      1S   
ATOM   4097 CZ2  TRP   275     -18.973  10.165 -41.136  1.00  1.00      1S   
ATOM   4098 HZ2  TRP   275     -19.456  10.934 -41.720  1.00  0.00      1S   
ATOM   4099 CH2  TRP   275     -17.636   9.826 -41.380  1.00  1.00      1S   
ATOM   4100 HH2  TRP   275     -17.089  10.348 -42.152  1.00  0.00      1S   
ATOM   4101 C    TRP   275     -20.647   5.186 -35.873  1.00  1.00      1S   
ATOM   4102 O    TRP   275     -20.049   4.282 -36.452  1.00  1.00      1S   
ATOM   4103 N    THR   276     -21.085   5.063 -34.598  1.00  1.00      1S   
ATOM   4104 HN   THR   276     -21.561   5.829 -34.172  1.00  0.00      1S   
ATOM   4105 CA   THR   276     -20.873   3.941 -33.700  1.00  1.00      1S   
ATOM   4106 HA   THR   276     -19.830   3.966 -33.415  1.00  0.00      1S   
ATOM   4107 CB   THR   276     -21.741   4.064 -32.453  1.00  1.00      1S   
ATOM   4108 HB   THR   276     -22.811   3.890 -32.703  1.00  0.00      1S   
ATOM   4109 OG1  THR   276     -21.647   5.377 -31.916  1.00  1.00      1S   
ATOM   4110 HG1  THR   276     -22.268   5.405 -31.183  1.00  0.00      1S   
ATOM   4111 CG2  THR   276     -21.288   3.058 -31.376  1.00  1.00      1S   
ATOM   4112 HG21 THR   276     -20.215   3.211 -31.129  1.00  0.00      1S   
ATOM   4113 HG22 THR   276     -21.425   2.013 -31.723  1.00  0.00      1S   
ATOM   4114 HG23 THR   276     -21.886   3.190 -30.450  1.00  0.00      1S   
ATOM   4115 C    THR   276     -21.161   2.592 -34.323  1.00  1.00      1S   
ATOM   4116 O    THR   276     -20.380   1.652 -34.181  1.00  1.00      1S   
ATOM   4117 N    ASN   277     -22.303   2.473 -35.040  1.00  1.00      1S   
ATOM   4118 HN   ASN   277     -22.891   3.262 -35.199  1.00  0.00      1S   
ATOM   4119 CA   ASN   277     -22.800   1.208 -35.536  1.00  1.00      1S   
ATOM   4120 HA   ASN   277     -22.542   0.439 -34.820  1.00  0.00      1S   
ATOM   4121 CB   ASN   277     -24.338   1.233 -35.698  1.00  1.00      1S   
ATOM   4122 HB1  ASN   277     -24.705   0.291 -36.157  1.00  0.00      1S   
ATOM   4123 HB2  ASN   277     -24.630   2.080 -36.346  1.00  0.00      1S   
ATOM   4124 CG   ASN   277     -24.980   1.368 -34.311  1.00  1.00      1S   
ATOM   4125 OD1  ASN   277     -24.623   0.640 -33.381  1.00  1.00      1S   
ATOM   4126 ND2  ASN   277     -25.946   2.319 -34.164  1.00  1.00      1S   
ATOM   4127 HD21 ASN   277     -26.234   2.864 -34.959  1.00  0.00      1S   
ATOM   4128 HD22 ASN   277     -26.408   2.425 -33.289  1.00  0.00      1S   
ATOM   4129 C    ASN   277     -22.162   0.798 -36.845  1.00  1.00      1S   
ATOM   4130 O    ASN   277     -22.499  -0.249 -37.394  1.00  1.00      1S   
ATOM   4131 N    LEU   278     -21.174   1.576 -37.349  1.00  1.00      1S   
ATOM   4132 HN   LEU   278     -20.929   2.447 -36.926  1.00  0.00      1S   
ATOM   4133 CA   LEU   278     -20.365   1.185 -38.482  1.00  1.00      1S   
ATOM   4134 HA   LEU   278     -20.967   0.597 -39.161  1.00  0.00      1S   
ATOM   4135 CB   LEU   278     -19.780   2.400 -39.244  1.00  1.00      1S   
ATOM   4136 HB1  LEU   278     -19.202   2.034 -40.123  1.00  0.00      1S   
ATOM   4137 HB2  LEU   278     -19.077   2.955 -38.584  1.00  0.00      1S   
ATOM   4138 CG   LEU   278     -20.848   3.388 -39.764  1.00  1.00      1S   
ATOM   4139 HG   LEU   278     -21.318   3.885 -38.883  1.00  0.00      1S   
ATOM   4140 CD1  LEU   278     -20.203   4.493 -40.620  1.00  1.00      1S   
ATOM   4141 HD11 LEU   278     -19.736   4.050 -41.525  1.00  0.00      1S   
ATOM   4142 HD12 LEU   278     -19.417   5.025 -40.044  1.00  0.00      1S   
ATOM   4143 HD13 LEU   278     -20.967   5.231 -40.940  1.00  0.00      1S   
ATOM   4144 CD2  LEU   278     -21.965   2.672 -40.544  1.00  1.00      1S   
ATOM   4145 HD21 LEU   278     -22.580   2.042 -39.867  1.00  0.00      1S   
ATOM   4146 HD22 LEU   278     -21.531   2.029 -41.338  1.00  0.00      1S   
ATOM   4147 HD23 LEU   278     -22.637   3.412 -41.020  1.00  0.00      1S   
ATOM   4148 C    LEU   278     -19.205   0.325 -38.051  1.00  1.00      1S   
ATOM   4149 O    LEU   278     -18.433  -0.118 -38.895  1.00  1.00      1S   
ATOM   4150 N    TYR   279     -19.049   0.046 -36.733  1.00  1.00      1S   
ATOM   4151 HN   TYR   279     -19.714   0.374 -36.065  1.00  0.00      1S   
ATOM   4152 CA   TYR   279     -17.900  -0.640 -36.177  1.00  1.00      1S   
ATOM   4153 HA   TYR   279     -17.029  -0.068 -36.467  1.00  0.00      1S   
ATOM   4154 CB   TYR   279     -17.956  -0.694 -34.624  1.00  1.00      1S   
ATOM   4155 HB1  TYR   279     -18.867  -1.236 -34.292  1.00  0.00      1S   
ATOM   4156 HB2  TYR   279     -18.002   0.341 -34.223  1.00  0.00      1S   
ATOM   4157 CG   TYR   279     -16.738  -1.363 -34.025  1.00  1.00      1S   
ATOM   4158 CD1  TYR   279     -15.497  -0.704 -33.988  1.00  1.00      1S   
ATOM   4159 HD1  TYR   279     -15.412   0.305 -34.362  1.00  0.00      1S   
ATOM   4160 CE1  TYR   279     -14.364  -1.350 -33.477  1.00  1.00      1S   
ATOM   4161 HE1  TYR   279     -13.420  -0.828 -33.453  1.00  0.00      1S   
ATOM   4162 CZ   TYR   279     -14.465  -2.660 -32.988  1.00  1.00      1S   
ATOM   4163 OH   TYR   279     -13.333  -3.306 -32.454  1.00  1.00      1S   
ATOM   4164 HH   TYR   279     -12.575  -2.735 -32.601  1.00  0.00      1S   
ATOM   4165 CD2  TYR   279     -16.819  -2.688 -33.560  1.00  1.00      1S   
ATOM   4166 HD2  TYR   279     -17.758  -3.219 -33.620  1.00  0.00      1S   
ATOM   4167 CE2  TYR   279     -15.691  -3.333 -33.042  1.00  1.00      1S   
ATOM   4168 HE2  TYR   279     -15.768  -4.353 -32.691  1.00  0.00      1S   
ATOM   4169 C    TYR   279     -17.725  -2.033 -36.734  1.00  1.00      1S   
ATOM   4170 O    TYR   279     -16.601  -2.433 -37.014  1.00  1.00      1S   
ATOM   4171 N    SER   280     -18.818  -2.806 -36.923  1.00  1.00      1S   
ATOM   4172 HN   SER   280     -19.735  -2.474 -36.716  1.00  0.00      1S   
ATOM   4173 CA   SER   280     -18.729  -4.175 -37.395  1.00  1.00      1S   
ATOM   4174 HA   SER   280     -18.046  -4.687 -36.732  1.00  0.00      1S   
ATOM   4175 CB   SER   280     -20.090  -4.920 -37.322  1.00  1.00      1S   
ATOM   4176 HB1  SER   280     -20.510  -4.795 -36.301  1.00  0.00      1S   
ATOM   4177 HB2  SER   280     -19.932  -6.005 -37.502  1.00  0.00      1S   
ATOM   4178 OG   SER   280     -21.046  -4.428 -38.258  1.00  1.00      1S   
ATOM   4179 HG1  SER   280     -21.784  -5.043 -38.239  1.00  0.00      1S   
ATOM   4180 C    SER   280     -18.152  -4.264 -38.796  1.00  1.00      1S   
ATOM   4181 O    SER   280     -17.417  -5.196 -39.115  1.00  1.00      1S   
ATOM   4182 N    LEU   281     -18.460  -3.264 -39.653  1.00  1.00      1S   
ATOM   4183 HN   LEU   281     -19.058  -2.517 -39.370  1.00  0.00      1S   
ATOM   4184 CA   LEU   281     -18.000  -3.215 -41.018  1.00  1.00      1S   
ATOM   4185 HA   LEU   281     -17.834  -4.223 -41.362  1.00  0.00      1S   
ATOM   4186 CB   LEU   281     -19.031  -2.510 -41.936  1.00  1.00      1S   
ATOM   4187 HB1  LEU   281     -18.565  -2.272 -42.919  1.00  0.00      1S   
ATOM   4188 HB2  LEU   281     -19.344  -1.550 -41.471  1.00  0.00      1S   
ATOM   4189 CG   LEU   281     -20.283  -3.372 -42.225  1.00  1.00      1S   
ATOM   4190 HG   LEU   281     -20.827  -3.533 -41.266  1.00  0.00      1S   
ATOM   4191 CD1  LEU   281     -21.247  -2.654 -43.188  1.00  1.00      1S   
ATOM   4192 HD11 LEU   281     -20.743  -2.445 -44.155  1.00  0.00      1S   
ATOM   4193 HD12 LEU   281     -21.597  -1.696 -42.750  1.00  0.00      1S   
ATOM   4194 HD13 LEU   281     -22.129  -3.297 -43.388  1.00  0.00      1S   
ATOM   4195 CD2  LEU   281     -19.902  -4.758 -42.784  1.00  1.00      1S   
ATOM   4196 HD21 LEU   281     -19.504  -5.408 -41.976  1.00  0.00      1S   
ATOM   4197 HD22 LEU   281     -19.123  -4.651 -43.570  1.00  0.00      1S   
ATOM   4198 HD23 LEU   281     -20.787  -5.260 -43.226  1.00  0.00      1S   
ATOM   4199 C    LEU   281     -16.670  -2.522 -41.164  1.00  1.00      1S   
ATOM   4200 O    LEU   281     -16.054  -2.631 -42.223  1.00  1.00      1S   
ATOM   4201 N    THR   282     -16.188  -1.796 -40.127  1.00  1.00      1S   
ATOM   4202 HN   THR   282     -16.670  -1.749 -39.255  1.00  0.00      1S   
ATOM   4203 CA   THR   282     -15.001  -0.974 -40.254  1.00  1.00      1S   
ATOM   4204 HA   THR   282     -14.588  -1.091 -41.244  1.00  0.00      1S   
ATOM   4205 CB   THR   282     -15.266   0.519 -40.072  1.00  1.00      1S   
ATOM   4206 HB   THR   282     -14.329   1.089 -40.274  1.00  0.00      1S   
ATOM   4207 OG1  THR   282     -15.699   0.841 -38.757  1.00  1.00      1S   
ATOM   4208 HG1  THR   282     -16.604   0.519 -38.696  1.00  0.00      1S   
ATOM   4209 CG2  THR   282     -16.335   0.998 -41.073  1.00  1.00      1S   
ATOM   4210 HG21 THR   282     -17.300   0.477 -40.917  1.00  0.00      1S   
ATOM   4211 HG22 THR   282     -16.014   0.799 -42.112  1.00  0.00      1S   
ATOM   4212 HG23 THR   282     -16.509   2.089 -40.959  1.00  0.00      1S   
ATOM   4213 C    THR   282     -13.914  -1.399 -39.302  1.00  1.00      1S   
ATOM   4214 O    THR   282     -12.852  -0.784 -39.300  1.00  1.00      1S   
ATOM   4215 N    VAL   283     -14.131  -2.449 -38.470  1.00  1.00      1S   
ATOM   4216 HN   VAL   283     -15.000  -2.939 -38.480  1.00  0.00      1S   
ATOM   4217 CA   VAL   283     -13.205  -2.875 -37.434  1.00  1.00      1S   
ATOM   4218 HA   VAL   283     -13.146  -2.042 -36.755  1.00  0.00      1S   
ATOM   4219 CB   VAL   283     -13.717  -4.047 -36.590  1.00  1.00      1S   
ATOM   4220 HB   VAL   283     -14.588  -3.674 -36.000  1.00  0.00      1S   
ATOM   4221 CG1  VAL   283     -14.228  -5.199 -37.478  1.00  1.00      1S   
ATOM   4222 HG11 VAL   283     -13.411  -5.610 -38.105  1.00  0.00      1S   
ATOM   4223 HG12 VAL   283     -15.049  -4.855 -38.140  1.00  0.00      1S   
ATOM   4224 HG13 VAL   283     -14.622  -6.018 -36.841  1.00  0.00      1S   
ATOM   4225 CG2  VAL   283     -12.654  -4.524 -35.573  1.00  1.00      1S   
ATOM   4226 HG21 VAL   283     -12.268  -3.671 -34.979  1.00  0.00      1S   
ATOM   4227 HG22 VAL   283     -11.802  -5.015 -36.088  1.00  0.00      1S   
ATOM   4228 HG23 VAL   283     -13.102  -5.262 -34.874  1.00  0.00      1S   
ATOM   4229 C    VAL   283     -11.845  -3.184 -38.045  1.00  1.00      1S   
ATOM   4230 O    VAL   283     -11.799  -3.922 -39.030  1.00  1.00      1S   
ATOM   4231 N    PRO   284     -10.728  -2.627 -37.564  1.00  1.00      1S   
ATOM   4232 CD   PRO   284     -10.698  -1.547 -36.572  1.00  1.00      1S   
ATOM   4233 HD1  PRO   284     -10.725  -2.003 -35.561  1.00  0.00      1S   
ATOM   4234 HD2  PRO   284     -11.543  -0.838 -36.696  1.00  0.00      1S   
ATOM   4235 CA   PRO   284      -9.445  -2.772 -38.227  1.00  1.00      1S   
ATOM   4236 HA   PRO   284      -9.544  -2.457 -39.256  1.00  0.00      1S   
ATOM   4237 CB   PRO   284      -8.489  -1.869 -37.435  1.00  1.00      1S   
ATOM   4238 HB1  PRO   284      -7.719  -1.439 -38.094  1.00  0.00      1S   
ATOM   4239 HB2  PRO   284      -7.977  -2.406 -36.611  1.00  0.00      1S   
ATOM   4240 CG   PRO   284      -9.385  -0.805 -36.803  1.00  1.00      1S   
ATOM   4241 HG1  PRO   284      -8.974  -0.415 -35.851  1.00  0.00      1S   
ATOM   4242 HG2  PRO   284      -9.543   0.034 -37.514  1.00  0.00      1S   
ATOM   4243 C    PRO   284      -8.963  -4.195 -38.210  1.00  1.00      1S   
ATOM   4244 O    PRO   284      -8.740  -4.772 -39.273  1.00  1.00      1S   
ATOM   4245 N    PHE   285      -8.804  -4.756 -36.999  1.00  1.00      1S   
ATOM   4246 HN   PHE   285      -9.015  -4.241 -36.169  1.00  0.00      1S   
ATOM   4247 CA   PHE   285      -8.232  -6.054 -36.785  1.00  1.00      1S   
ATOM   4248 HA   PHE   285      -7.880  -6.472 -37.719  1.00  0.00      1S   
ATOM   4249 CB   PHE   285      -7.069  -5.979 -35.772  1.00  1.00      1S   
ATOM   4250 HB1  PHE   285      -6.613  -6.979 -35.615  1.00  0.00      1S   
ATOM   4251 HB2  PHE   285      -7.420  -5.583 -34.795  1.00  0.00      1S   
ATOM   4252 CG   PHE   285      -6.003  -5.048 -36.306  1.00  1.00      1S   
ATOM   4253 CD1  PHE   285      -5.141  -5.469 -37.333  1.00  1.00      1S   
ATOM   4254 HD1  PHE   285      -5.248  -6.460 -37.748  1.00  0.00      1S   
ATOM   4255 CE1  PHE   285      -4.127  -4.627 -37.806  1.00  1.00      1S   
ATOM   4256 HE1  PHE   285      -3.461  -4.969 -38.584  1.00  0.00      1S   
ATOM   4257 CZ   PHE   285      -3.966  -3.348 -37.259  1.00  1.00      1S   
ATOM   4258 HZ   PHE   285      -3.173  -2.705 -37.612  1.00  0.00      1S   
ATOM   4259 CD2  PHE   285      -5.841  -3.751 -35.780  1.00  1.00      1S   
ATOM   4260 HD2  PHE   285      -6.496  -3.407 -34.993  1.00  0.00      1S   
ATOM   4261 CE2  PHE   285      -4.828  -2.907 -36.250  1.00  1.00      1S   
ATOM   4262 HE2  PHE   285      -4.702  -1.922 -35.829  1.00  0.00      1S   
ATOM   4263 C    PHE   285      -9.356  -6.904 -36.269  1.00  1.00      1S   
ATOM   4264 O    PHE   285      -9.600  -6.989 -35.067  1.00  1.00      1S   
ATOM   4265 N    GLY   286     -10.099  -7.534 -37.207  1.00  1.00      1S   
ATOM   4266 HN   GLY   286      -9.835  -7.493 -38.168  1.00  0.00      1S   
ATOM   4267 CA   GLY   286     -11.412  -8.089 -36.956  1.00  1.00      1S   
ATOM   4268 HA1  GLY   286     -11.854  -8.251 -37.928  1.00  0.00      1S   
ATOM   4269 HA2  GLY   286     -11.970  -7.374 -36.369  1.00  0.00      1S   
ATOM   4270 C    GLY   286     -11.447  -9.405 -36.234  1.00  1.00      1S   
ATOM   4271 O    GLY   286     -12.531  -9.953 -36.044  1.00  1.00      1S   
ATOM   4272 N    GLN   287     -10.283  -9.957 -35.814  1.00  1.00      1S   
ATOM   4273 HN   GLN   287      -9.408  -9.512 -35.989  1.00  0.00      1S   
ATOM   4274 CA   GLN   287     -10.236 -11.224 -35.116  1.00  1.00      1S   
ATOM   4275 HA   GLN   287     -11.238 -11.605 -34.978  1.00  0.00      1S   
ATOM   4276 CB   GLN   287      -9.438 -12.294 -35.890  1.00  1.00      1S   
ATOM   4277 HB1  GLN   287      -9.573 -13.265 -35.362  1.00  0.00      1S   
ATOM   4278 HB2  GLN   287      -8.353 -12.051 -35.889  1.00  0.00      1S   
ATOM   4279 CG   GLN   287      -9.925 -12.410 -37.347  1.00  1.00      1S   
ATOM   4280 HG1  GLN   287      -9.518 -11.565 -37.943  1.00  0.00      1S   
ATOM   4281 HG2  GLN   287     -11.034 -12.357 -37.379  1.00  0.00      1S   
ATOM   4282 CD   GLN   287      -9.478 -13.726 -37.985  1.00  1.00      1S   
ATOM   4283 OE1  GLN   287      -8.736 -13.735 -38.972  1.00  1.00      1S   
ATOM   4284 NE2  GLN   287      -9.969 -14.865 -37.410  1.00  1.00      1S   
ATOM   4285 HE21 GLN   287      -9.728 -15.753 -37.793  1.00  0.00      1S   
ATOM   4286 HE22 GLN   287     -10.562 -14.798 -36.607  1.00  0.00      1S   
ATOM   4287 C    GLN   287      -9.642 -11.073 -33.744  1.00  1.00      1S   
ATOM   4288 O    GLN   287      -9.558 -12.046 -32.996  1.00  1.00      1S   
ATOM   4289 N    LYS   288      -9.233  -9.843 -33.359  1.00  1.00      1S   
ATOM   4290 HN   LYS   288      -9.312  -9.051 -33.960  1.00  0.00      1S   
ATOM   4291 CA   LYS   288      -8.689  -9.587 -32.047  1.00  1.00      1S   
ATOM   4292 HA   LYS   288      -8.030 -10.407 -31.808  1.00  0.00      1S   
ATOM   4293 CB   LYS   288      -7.899  -8.263 -32.007  1.00  1.00      1S   
ATOM   4294 HB1  LYS   288      -7.823  -7.883 -30.966  1.00  0.00      1S   
ATOM   4295 HB2  LYS   288      -8.448  -7.503 -32.604  1.00  0.00      1S   
ATOM   4296 CG   LYS   288      -6.472  -8.403 -32.549  1.00  1.00      1S   
ATOM   4297 HG1  LYS   288      -6.078  -7.381 -32.743  1.00  0.00      1S   
ATOM   4298 HG2  LYS   288      -6.483  -8.951 -33.515  1.00  0.00      1S   
ATOM   4299 CD   LYS   288      -5.531  -9.101 -31.552  1.00  1.00      1S   
ATOM   4300 HD1  LYS   288      -5.889 -10.135 -31.356  1.00  0.00      1S   
ATOM   4301 HD2  LYS   288      -5.575  -8.542 -30.593  1.00  0.00      1S   
ATOM   4302 CE   LYS   288      -4.080  -9.157 -32.037  1.00  1.00      1S   
ATOM   4303 HE1  LYS   288      -3.749  -8.161 -32.390  1.00  0.00      1S   
ATOM   4304 HE2  LYS   288      -3.973  -9.890 -32.863  1.00  0.00      1S   
ATOM   4305 NZ   LYS   288      -3.171  -9.551 -30.941  1.00  1.00      1S   
ATOM   4306 HZ1  LYS   288      -3.505 -10.427 -30.496  1.00  0.00      1S   
ATOM   4307 HZ2  LYS   288      -3.149  -8.790 -30.221  1.00  0.00      1S   
ATOM   4308 HZ3  LYS   288      -2.211  -9.686 -31.316  1.00  0.00      1S   
ATOM   4309 C    LYS   288      -9.816  -9.504 -31.039  1.00  1.00      1S   
ATOM   4310 O    LYS   288     -10.860  -8.939 -31.366  1.00  1.00      1S   
ATOM   4311 N    PRO   289      -9.678 -10.045 -29.824  1.00  1.00      1S   
ATOM   4312 CD   PRO   289      -8.486 -10.747 -29.342  1.00  1.00      1S   
ATOM   4313 HD1  PRO   289      -7.570 -10.145 -29.518  1.00  0.00      1S   
ATOM   4314 HD2  PRO   289      -8.417 -11.725 -29.865  1.00  0.00      1S   
ATOM   4315 CA   PRO   289     -10.763 -10.096 -28.861  1.00  1.00      1S   
ATOM   4316 HA   PRO   289     -11.655 -10.477 -29.339  1.00  0.00      1S   
ATOM   4317 CB   PRO   289     -10.252 -11.026 -27.746  1.00  1.00      1S   
ATOM   4318 HB1  PRO   289     -10.577 -12.066 -27.970  1.00  0.00      1S   
ATOM   4319 HB2  PRO   289     -10.618 -10.747 -26.737  1.00  0.00      1S   
ATOM   4320 CG   PRO   289      -8.724 -10.953 -27.846  1.00  1.00      1S   
ATOM   4321 HG1  PRO   289      -8.357 -10.064 -27.288  1.00  0.00      1S   
ATOM   4322 HG2  PRO   289      -8.230 -11.866 -27.458  1.00  0.00      1S   
ATOM   4323 C    PRO   289     -11.052  -8.720 -28.316  1.00  1.00      1S   
ATOM   4324 O    PRO   289     -10.123  -7.958 -28.048  1.00  1.00      1S   
ATOM   4325 N    ASN   290     -12.352  -8.401 -28.151  1.00  1.00      1S   
ATOM   4326 HN   ASN   290     -13.074  -9.039 -28.406  1.00  0.00      1S   
ATOM   4327 CA   ASN   290     -12.799  -7.157 -27.582  1.00  1.00      1S   
ATOM   4328 HA   ASN   290     -12.049  -6.399 -27.771  1.00  0.00      1S   
ATOM   4329 CB   ASN   290     -14.165  -6.730 -28.187  1.00  1.00      1S   
ATOM   4330 HB1  ASN   290     -15.005  -7.245 -27.676  1.00  0.00      1S   
ATOM   4331 HB2  ASN   290     -14.186  -7.040 -29.254  1.00  0.00      1S   
ATOM   4332 CG   ASN   290     -14.369  -5.211 -28.101  1.00  1.00      1S   
ATOM   4333 OD1  ASN   290     -14.506  -4.640 -27.015  1.00  1.00      1S   
ATOM   4334 ND2  ASN   290     -14.388  -4.539 -29.291  1.00  1.00      1S   
ATOM   4335 HD21 ASN   290     -14.501  -3.549 -29.293  1.00  0.00      1S   
ATOM   4336 HD22 ASN   290     -14.271  -5.040 -30.149  1.00  0.00      1S   
ATOM   4337 C    ASN   290     -12.929  -7.387 -26.096  1.00  1.00      1S   
ATOM   4338 O    ASN   290     -13.321  -8.470 -25.661  1.00  1.00      1S   
ATOM   4339 N    ILE   291     -12.597  -6.360 -25.278  1.00  1.00      1S   
ATOM   4340 HN   ILE   291     -12.261  -5.496 -25.644  1.00  0.00      1S   
ATOM   4341 CA   ILE   291     -12.748  -6.411 -23.841  1.00  1.00      1S   
ATOM   4342 HA   ILE   291     -12.409  -7.379 -23.494  1.00  0.00      1S   
ATOM   4343 CB   ILE   291     -11.954  -5.327 -23.114  1.00  1.00      1S   
ATOM   4344 HB   ILE   291     -12.228  -4.331 -23.531  1.00  0.00      1S   
ATOM   4345 CG2  ILE   291     -12.279  -5.321 -21.599  1.00  1.00      1S   
ATOM   4346 HG21 ILE   291     -12.013  -6.297 -21.142  1.00  0.00      1S   
ATOM   4347 HG22 ILE   291     -13.351  -5.114 -21.407  1.00  0.00      1S   
ATOM   4348 HG23 ILE   291     -11.710  -4.521 -21.083  1.00  0.00      1S   
ATOM   4349 CG1  ILE   291     -10.447  -5.552 -23.363  1.00  1.00      1S   
ATOM   4350 HG11 ILE   291     -10.230  -5.452 -24.449  1.00  0.00      1S   
ATOM   4351 HG12 ILE   291     -10.194  -6.591 -23.057  1.00  0.00      1S   
ATOM   4352 CD   ILE   291      -9.546  -4.587 -22.595  1.00  1.00      1S   
ATOM   4353 HD1  ILE   291      -9.590  -4.785 -21.504  1.00  0.00      1S   
ATOM   4354 HD2  ILE   291      -9.860  -3.537 -22.774  1.00  0.00      1S   
ATOM   4355 HD3  ILE   291      -8.490  -4.705 -22.918  1.00  0.00      1S   
ATOM   4356 C    ILE   291     -14.210  -6.259 -23.514  1.00  1.00      1S   
ATOM   4357 O    ILE   291     -14.816  -5.225 -23.789  1.00  1.00      1S   
ATOM   4358 N    ASP   292     -14.794  -7.309 -22.900  1.00  1.00      1S   
ATOM   4359 HN   ASP   292     -14.304  -8.162 -22.739  1.00  0.00      1S   
ATOM   4360 CA   ASP   292     -16.127  -7.250 -22.372  1.00  1.00      1S   
ATOM   4361 HA   ASP   292     -16.356  -6.228 -22.118  1.00  0.00      1S   
ATOM   4362 CB   ASP   292     -17.194  -7.787 -23.362  1.00  1.00      1S   
ATOM   4363 HB1  ASP   292     -17.001  -8.855 -23.591  1.00  0.00      1S   
ATOM   4364 HB2  ASP   292     -17.121  -7.211 -24.310  1.00  0.00      1S   
ATOM   4365 CG   ASP   292     -18.617  -7.627 -22.825  1.00  1.00      1S   
ATOM   4366 OD1  ASP   292     -18.788  -6.967 -21.766  1.00  1.00      1S   
ATOM   4367 OD2  ASP   292     -19.554  -8.167 -23.468  1.00  1.00      1S   
ATOM   4368 C    ASP   292     -16.086  -8.055 -21.102  1.00  1.00      1S   
ATOM   4369 O    ASP   292     -15.937  -9.275 -21.129  1.00  1.00      1S   
ATOM   4370 N    VAL   293     -16.220  -7.366 -19.946  1.00  1.00      1S   
ATOM   4371 HN   VAL   293     -16.359  -6.379 -19.946  1.00  0.00      1S   
ATOM   4372 CA   VAL   293     -16.105  -7.982 -18.645  1.00  1.00      1S   
ATOM   4373 HA   VAL   293     -15.458  -8.845 -18.728  1.00  0.00      1S   
ATOM   4374 CB   VAL   293     -15.480  -7.059 -17.606  1.00  1.00      1S   
ATOM   4375 HB   VAL   293     -15.423  -7.615 -16.645  1.00  0.00      1S   
ATOM   4376 CG1  VAL   293     -14.037  -6.719 -18.032  1.00  1.00      1S   
ATOM   4377 HG11 VAL   293     -14.026  -6.171 -18.996  1.00  0.00      1S   
ATOM   4378 HG12 VAL   293     -13.434  -7.646 -18.139  1.00  0.00      1S   
ATOM   4379 HG13 VAL   293     -13.558  -6.078 -17.261  1.00  0.00      1S   
ATOM   4380 CG2  VAL   293     -16.319  -5.785 -17.375  1.00  1.00      1S   
ATOM   4381 HG21 VAL   293     -17.338  -6.031 -17.014  1.00  0.00      1S   
ATOM   4382 HG22 VAL   293     -16.398  -5.201 -18.311  1.00  0.00      1S   
ATOM   4383 HG23 VAL   293     -15.829  -5.144 -16.611  1.00  0.00      1S   
ATOM   4384 C    VAL   293     -17.441  -8.471 -18.135  1.00  1.00      1S   
ATOM   4385 O    VAL   293     -17.534  -8.883 -16.982  1.00  1.00      1S   
ATOM   4386 N    THR   294     -18.504  -8.467 -18.979  1.00  1.00      1S   
ATOM   4387 HN   THR   294     -18.395  -8.145 -19.919  1.00  0.00      1S   
ATOM   4388 CA   THR   294     -19.862  -8.836 -18.608  1.00  1.00      1S   
ATOM   4389 HA   THR   294     -20.164  -8.158 -17.821  1.00  0.00      1S   
ATOM   4390 CB   THR   294     -20.848  -8.708 -19.761  1.00  1.00      1S   
ATOM   4391 HB   THR   294     -20.523  -9.323 -20.630  1.00  0.00      1S   
ATOM   4392 OG1  THR   294     -20.918  -7.353 -20.181  1.00  1.00      1S   
ATOM   4393 HG1  THR   294     -20.182  -7.227 -20.799  1.00  0.00      1S   
ATOM   4394 CG2  THR   294     -22.263  -9.144 -19.328  1.00  1.00      1S   
ATOM   4395 HG21 THR   294     -22.502  -8.715 -18.335  1.00  0.00      1S   
ATOM   4396 HG22 THR   294     -22.335 -10.249 -19.257  1.00  0.00      1S   
ATOM   4397 HG23 THR   294     -23.023  -8.795 -20.059  1.00  0.00      1S   
ATOM   4398 C    THR   294     -19.948 -10.233 -18.047  1.00  1.00      1S   
ATOM   4399 O    THR   294     -20.518 -10.428 -16.975  1.00  1.00      1S   
ATOM   4400 N    ASP   295     -19.351 -11.234 -18.739  1.00  1.00      1S   
ATOM   4401 HN   ASP   295     -18.904 -11.061 -19.612  1.00  0.00      1S   
ATOM   4402 CA   ASP   295     -19.322 -12.614 -18.294  1.00  1.00      1S   
ATOM   4403 HA   ASP   295     -20.346 -12.942 -18.167  1.00  0.00      1S   
ATOM   4404 CB   ASP   295     -18.571 -13.545 -19.282  1.00  1.00      1S   
ATOM   4405 HB1  ASP   295     -18.303 -14.508 -18.793  1.00  0.00      1S   
ATOM   4406 HB2  ASP   295     -17.635 -13.051 -19.617  1.00  0.00      1S   
ATOM   4407 CG   ASP   295     -19.427 -13.888 -20.504  1.00  1.00      1S   
ATOM   4408 OD1  ASP   295     -20.681 -13.832 -20.406  1.00  1.00      1S   
ATOM   4409 OD2  ASP   295     -18.822 -14.240 -21.551  1.00  1.00      1S   
ATOM   4410 C    ASP   295     -18.661 -12.752 -16.946  1.00  1.00      1S   
ATOM   4411 O    ASP   295     -19.158 -13.485 -16.102  1.00  1.00      1S   
ATOM   4412 N    ALA   296     -17.555 -12.014 -16.697  1.00  1.00      1S   
ATOM   4413 HN   ALA   296     -17.182 -11.404 -17.390  1.00  0.00      1S   
ATOM   4414 CA   ALA   296     -16.837 -12.046 -15.442  1.00  1.00      1S   
ATOM   4415 HA   ALA   296     -16.627 -13.083 -15.217  1.00  0.00      1S   
ATOM   4416 CB   ALA   296     -15.499 -11.293 -15.539  1.00  1.00      1S   
ATOM   4417 HB1  ALA   296     -15.660 -10.225 -15.798  1.00  0.00      1S   
ATOM   4418 HB2  ALA   296     -14.869 -11.751 -16.332  1.00  0.00      1S   
ATOM   4419 HB3  ALA   296     -14.941 -11.347 -14.580  1.00  0.00      1S   
ATOM   4420 C    ALA   296     -17.641 -11.474 -14.293  1.00  1.00      1S   
ATOM   4421 O    ALA   296     -17.531 -11.948 -13.166  1.00  1.00      1S   
ATOM   4422 N    MET   297     -18.505 -10.463 -14.551  1.00  1.00      1S   
ATOM   4423 HN   MET   297     -18.570 -10.066 -15.466  1.00  0.00      1S   
ATOM   4424 CA   MET   297     -19.401  -9.902 -13.559  1.00  1.00      1S   
ATOM   4425 HA   MET   297     -18.819  -9.662 -12.679  1.00  0.00      1S   
ATOM   4426 CB   MET   297     -20.114  -8.620 -14.053  1.00  1.00      1S   
ATOM   4427 HB1  MET   297     -20.806  -8.258 -13.261  1.00  0.00      1S   
ATOM   4428 HB2  MET   297     -20.722  -8.863 -14.951  1.00  0.00      1S   
ATOM   4429 CG   MET   297     -19.155  -7.466 -14.398  1.00  1.00      1S   
ATOM   4430 HG1  MET   297     -18.302  -7.879 -14.972  1.00  0.00      1S   
ATOM   4431 HG2  MET   297     -18.732  -7.058 -13.454  1.00  0.00      1S   
ATOM   4432 SD   MET   297     -19.899  -6.132 -15.383  1.00  1.00      1S   
ATOM   4433 CE   MET   297     -21.011  -5.479 -14.107  1.00  1.00      1S   
ATOM   4434 HE1  MET   297     -20.435  -5.120 -13.229  1.00  0.00      1S   
ATOM   4435 HE2  MET   297     -21.737  -6.244 -13.763  1.00  0.00      1S   
ATOM   4436 HE3  MET   297     -21.597  -4.621 -14.497  1.00  0.00      1S   
ATOM   4437 C    MET   297     -20.457 -10.914 -13.167  1.00  1.00      1S   
ATOM   4438 O    MET   297     -20.766 -11.061 -11.989  1.00  1.00      1S   
ATOM   4439 N    VAL   298     -21.009 -11.664 -14.152  1.00  1.00      1S   
ATOM   4440 HN   VAL   298     -20.741 -11.526 -15.104  1.00  0.00      1S   
ATOM   4441 CA   VAL   298     -22.005 -12.698 -13.935  1.00  1.00      1S   
ATOM   4442 HA   VAL   298     -22.765 -12.287 -13.285  1.00  0.00      1S   
ATOM   4443 CB   VAL   298     -22.674 -13.131 -15.238  1.00  1.00      1S   
ATOM   4444 HB   VAL   298     -21.900 -13.452 -15.971  1.00  0.00      1S   
ATOM   4445 CG1  VAL   298     -23.647 -14.309 -15.006  1.00  1.00      1S   
ATOM   4446 HG11 VAL   298     -24.346 -14.077 -14.175  1.00  0.00      1S   
ATOM   4447 HG12 VAL   298     -23.095 -15.241 -14.761  1.00  0.00      1S   
ATOM   4448 HG13 VAL   298     -24.242 -14.497 -15.925  1.00  0.00      1S   
ATOM   4449 CG2  VAL   298     -23.432 -11.920 -15.824  1.00  1.00      1S   
ATOM   4450 HG21 VAL   298     -22.745 -11.079 -16.047  1.00  0.00      1S   
ATOM   4451 HG22 VAL   298     -24.202 -11.565 -15.107  1.00  0.00      1S   
ATOM   4452 HG23 VAL   298     -23.939 -12.211 -16.768  1.00  0.00      1S   
ATOM   4453 C    VAL   298     -21.391 -13.886 -13.218  1.00  1.00      1S   
ATOM   4454 O    VAL   298     -22.008 -14.451 -12.316  1.00  1.00      1S   
ATOM   4455 N    ASP   299     -20.139 -14.264 -13.574  1.00  1.00      1S   
ATOM   4456 HN   ASP   299     -19.675 -13.812 -14.336  1.00  0.00      1S   
ATOM   4457 CA   ASP   299     -19.380 -15.341 -12.965  1.00  1.00      1S   
ATOM   4458 HA   ASP   299     -19.954 -16.252 -13.065  1.00  0.00      1S   
ATOM   4459 CB   ASP   299     -17.977 -15.514 -13.616  1.00  1.00      1S   
ATOM   4460 HB1  ASP   299     -17.330 -16.162 -12.986  1.00  0.00      1S   
ATOM   4461 HB2  ASP   299     -17.489 -14.522 -13.709  1.00  0.00      1S   
ATOM   4462 CG   ASP   299     -18.046 -16.159 -15.005  1.00  1.00      1S   
ATOM   4463 OD1  ASP   299     -19.144 -16.618 -15.416  1.00  1.00      1S   
ATOM   4464 OD2  ASP   299     -16.975 -16.210 -15.667  1.00  1.00      1S   
ATOM   4465 C    ASP   299     -19.178 -15.098 -11.487  1.00  1.00      1S   
ATOM   4466 O    ASP   299     -19.351 -16.006 -10.675  1.00  1.00      1S   
ATOM   4467 N    GLN   300     -18.835 -13.849 -11.102  1.00  1.00      1S   
ATOM   4468 HN   GLN   300     -18.696 -13.124 -11.776  1.00  0.00      1S   
ATOM   4469 CA   GLN   300     -18.586 -13.483  -9.726  1.00  1.00      1S   
ATOM   4470 HA   GLN   300     -18.186 -14.339  -9.202  1.00  0.00      1S   
ATOM   4471 CB   GLN   300     -17.556 -12.339  -9.644  1.00  1.00      1S   
ATOM   4472 HB1  GLN   300     -17.390 -12.052  -8.580  1.00  0.00      1S   
ATOM   4473 HB2  GLN   300     -17.957 -11.456 -10.190  1.00  0.00      1S   
ATOM   4474 CG   GLN   300     -16.205 -12.735 -10.258  1.00  1.00      1S   
ATOM   4475 HG1  GLN   300     -16.355 -13.113 -11.292  1.00  0.00      1S   
ATOM   4476 HG2  GLN   300     -15.736 -13.542  -9.658  1.00  0.00      1S   
ATOM   4477 CD   GLN   300     -15.277 -11.521 -10.294  1.00  1.00      1S   
ATOM   4478 OE1  GLN   300     -15.354 -10.617  -9.455  1.00  1.00      1S   
ATOM   4479 NE2  GLN   300     -14.368 -11.521 -11.311  1.00  1.00      1S   
ATOM   4480 HE21 GLN   300     -13.695 -10.781 -11.373  1.00  0.00      1S   
ATOM   4481 HE22 GLN   300     -14.356 -12.272 -11.969  1.00  0.00      1S   
ATOM   4482 C    GLN   300     -19.844 -13.047  -9.011  1.00  1.00      1S   
ATOM   4483 O    GLN   300     -19.771 -12.593  -7.870  1.00  1.00      1S   
ATOM   4484 N    ALA   301     -21.028 -13.192  -9.657  1.00  1.00      1S   
ATOM   4485 HN   ALA   301     -21.050 -13.552 -10.587  1.00  0.00      1S   
ATOM   4486 CA   ALA   301     -22.330 -12.939  -9.078  1.00  1.00      1S   
ATOM   4487 HA   ALA   301     -23.037 -13.098  -9.880  1.00  0.00      1S   
ATOM   4488 CB   ALA   301     -22.685 -13.921  -7.941  1.00  1.00      1S   
ATOM   4489 HB1  ALA   301     -22.026 -13.760  -7.062  1.00  0.00      1S   
ATOM   4490 HB2  ALA   301     -22.550 -14.966  -8.291  1.00  0.00      1S   
ATOM   4491 HB3  ALA   301     -23.742 -13.793  -7.623  1.00  0.00      1S   
ATOM   4492 C    ALA   301     -22.509 -11.515  -8.614  1.00  1.00      1S   
ATOM   4493 O    ALA   301     -23.052 -11.255  -7.540  1.00  1.00      1S   
ATOM   4494 N    TRP   302     -22.069 -10.546  -9.447  1.00  1.00      1S   
ATOM   4495 HN   TRP   302     -21.596 -10.774 -10.298  1.00  0.00      1S   
ATOM   4496 CA   TRP   302     -22.258  -9.138  -9.200  1.00  1.00      1S   
ATOM   4497 HA   TRP   302     -22.009  -8.926  -8.168  1.00  0.00      1S   
ATOM   4498 CB   TRP   302     -21.423  -8.224 -10.137  1.00  1.00      1S   
ATOM   4499 HB1  TRP   302     -21.801  -7.179 -10.090  1.00  0.00      1S   
ATOM   4500 HB2  TRP   302     -21.548  -8.577 -11.183  1.00  0.00      1S   
ATOM   4501 CG   TRP   302     -19.940  -8.178  -9.824  1.00  1.00      1S   
ATOM   4502 CD1  TRP   302     -19.143  -9.141  -9.273  1.00  1.00      1S   
ATOM   4503 HD1  TRP   302     -19.471 -10.126  -8.982  1.00  0.00      1S   
ATOM   4504 NE1  TRP   302     -17.859  -8.680  -9.130  1.00  1.00      1S   
ATOM   4505 HE1  TRP   302     -17.092  -9.206  -8.822  1.00  0.00      1S   
ATOM   4506 CE2  TRP   302     -17.805  -7.385  -9.574  1.00  1.00      1S   
ATOM   4507 CD2  TRP   302     -19.095  -7.028 -10.028  1.00  1.00      1S   
ATOM   4508 CE3  TRP   302     -19.355  -5.761 -10.539  1.00  1.00      1S   
ATOM   4509 HE3  TRP   302     -20.333  -5.466 -10.882  1.00  0.00      1S   
ATOM   4510 CZ3  TRP   302     -18.290  -4.850 -10.595  1.00  1.00      1S   
ATOM   4511 HZ3  TRP   302     -18.459  -3.857 -10.981  1.00  0.00      1S   
ATOM   4512 CZ2  TRP   302     -16.753  -6.481  -9.629  1.00  1.00      1S   
ATOM   4513 HZ2  TRP   302     -15.762  -6.739  -9.286  1.00  0.00      1S   
ATOM   4514 CH2  TRP   302     -17.008  -5.212 -10.152  1.00  1.00      1S   
ATOM   4515 HH2  TRP   302     -16.204  -4.492 -10.204  1.00  0.00      1S   
ATOM   4516 C    TRP   302     -23.705  -8.810  -9.423  1.00  1.00      1S   
ATOM   4517 O    TRP   302     -24.393  -9.447 -10.218  1.00  1.00      1S   
ATOM   4518 N    ASP   303     -24.187  -7.798  -8.687  1.00  1.00      1S   
ATOM   4519 HN   ASP   303     -23.628  -7.328  -8.008  1.00  0.00      1S   
ATOM   4520 CA   ASP   303     -25.523  -7.289  -8.814  1.00  1.00      1S   
ATOM   4521 HA   ASP   303     -25.971  -7.664  -9.723  1.00  0.00      1S   
ATOM   4522 CB   ASP   303     -26.439  -7.676  -7.614  1.00  1.00      1S   
ATOM   4523 HB1  ASP   303     -26.578  -8.779  -7.645  1.00  0.00      1S   
ATOM   4524 HB2  ASP   303     -27.440  -7.211  -7.723  1.00  0.00      1S   
ATOM   4525 CG   ASP   303     -25.882  -7.330  -6.225  1.00  1.00      1S   
ATOM   4526 OD1  ASP   303     -24.818  -6.666  -6.123  1.00  1.00      1S   
ATOM   4527 OD2  ASP   303     -26.545  -7.733  -5.233  1.00  1.00      1S   
ATOM   4528 C    ASP   303     -25.383  -5.804  -8.983  1.00  1.00      1S   
ATOM   4529 O    ASP   303     -24.273  -5.277  -9.038  1.00  1.00      1S   
ATOM   4530 N    ALA   304     -26.525  -5.087  -9.065  1.00  1.00      1S   
ATOM   4531 HN   ALA   304     -27.413  -5.538  -9.038  1.00  0.00      1S   
ATOM   4532 CA   ALA   304     -26.566  -3.652  -9.213  1.00  1.00      1S   
ATOM   4533 HA   ALA   304     -26.009  -3.393 -10.103  1.00  0.00      1S   
ATOM   4534 CB   ALA   304     -28.003  -3.136  -9.346  1.00  1.00      1S   
ATOM   4535 HB1  ALA   304     -28.604  -3.411  -8.453  1.00  0.00      1S   
ATOM   4536 HB2  ALA   304     -28.479  -3.590 -10.242  1.00  0.00      1S   
ATOM   4537 HB3  ALA   304     -28.024  -2.031  -9.465  1.00  0.00      1S   
ATOM   4538 C    ALA   304     -25.929  -2.965  -8.037  1.00  1.00      1S   
ATOM   4539 O    ALA   304     -25.152  -2.036  -8.212  1.00  1.00      1S   
ATOM   4540 N    GLN   305     -26.191  -3.454  -6.803  1.00  1.00      1S   
ATOM   4541 HN   GLN   305     -26.803  -4.233  -6.689  1.00  0.00      1S   
ATOM   4542 CA   GLN   305     -25.597  -2.959  -5.579  1.00  1.00      1S   
ATOM   4543 HA   GLN   305     -25.932  -1.940  -5.440  1.00  0.00      1S   
ATOM   4544 CB   GLN   305     -26.037  -3.829  -4.379  1.00  1.00      1S   
ATOM   4545 HB1  GLN   305     -25.840  -4.893  -4.637  1.00  0.00      1S   
ATOM   4546 HB2  GLN   305     -27.138  -3.734  -4.253  1.00  0.00      1S   
ATOM   4547 CG   GLN   305     -25.336  -3.554  -3.032  1.00  1.00      1S   
ATOM   4548 HG1  GLN   305     -24.237  -3.459  -3.157  1.00  0.00      1S   
ATOM   4549 HG2  GLN   305     -25.520  -4.424  -2.364  1.00  0.00      1S   
ATOM   4550 CD   GLN   305     -25.881  -2.299  -2.347  1.00  1.00      1S   
ATOM   4551 OE1  GLN   305     -26.753  -1.587  -2.854  1.00  1.00      1S   
ATOM   4552 NE2  GLN   305     -25.344  -2.042  -1.116  1.00  1.00      1S   
ATOM   4553 HE21 GLN   305     -25.682  -1.270  -0.585  1.00  0.00      1S   
ATOM   4554 HE22 GLN   305     -24.632  -2.644  -0.753  1.00  0.00      1S   
ATOM   4555 C    GLN   305     -24.089  -2.947  -5.659  1.00  1.00      1S   
ATOM   4556 O    GLN   305     -23.467  -1.929  -5.373  1.00  1.00      1S   
ATOM   4557 N    ARG   306     -23.475  -4.070  -6.099  1.00  1.00      1S   
ATOM   4558 HN   ARG   306     -24.003  -4.894  -6.313  1.00  0.00      1S   
ATOM   4559 CA   ARG   306     -22.046  -4.197  -6.254  1.00  1.00      1S   
ATOM   4560 HA   ARG   306     -21.614  -3.973  -5.290  1.00  0.00      1S   
ATOM   4561 CB   ARG   306     -21.634  -5.625  -6.675  1.00  1.00      1S   
ATOM   4562 HB1  ARG   306     -22.152  -5.898  -7.620  1.00  0.00      1S   
ATOM   4563 HB2  ARG   306     -21.982  -6.334  -5.890  1.00  0.00      1S   
ATOM   4564 CG   ARG   306     -20.121  -5.820  -6.868  1.00  1.00      1S   
ATOM   4565 HG1  ARG   306     -19.764  -5.181  -7.706  1.00  0.00      1S   
ATOM   4566 HG2  ARG   306     -19.952  -6.876  -7.171  1.00  0.00      1S   
ATOM   4567 CD   ARG   306     -19.307  -5.502  -5.606  1.00  1.00      1S   
ATOM   4568 HD1  ARG   306     -19.632  -6.120  -4.743  1.00  0.00      1S   
ATOM   4569 HD2  ARG   306     -19.403  -4.429  -5.335  1.00  0.00      1S   
ATOM   4570 NE   ARG   306     -17.861  -5.748  -5.884  1.00  1.00      1S   
ATOM   4571 HE   ARG   306     -17.256  -4.962  -6.044  1.00  0.00      1S   
ATOM   4572 CZ   ARG   306     -17.300  -6.989  -5.929  1.00  1.00      1S   
ATOM   4573 NH1  ARG   306     -18.039  -8.111  -5.726  1.00  1.00      1S   
ATOM   4574 HH11 ARG   306     -19.022  -8.022  -5.571  1.00  0.00      1S   
ATOM   4575 HH12 ARG   306     -17.615  -9.009  -5.791  1.00  0.00      1S   
ATOM   4576 NH2  ARG   306     -15.969  -7.093  -6.184  1.00  1.00      1S   
ATOM   4577 HH21 ARG   306     -15.438  -6.260  -6.338  1.00  0.00      1S   
ATOM   4578 HH22 ARG   306     -15.536  -7.992  -6.231  1.00  0.00      1S   
ATOM   4579 C    ARG   306     -21.487  -3.210  -7.252  1.00  1.00      1S   
ATOM   4580 O    ARG   306     -20.468  -2.586  -6.980  1.00  1.00      1S   
ATOM   4581 N    ILE   307     -22.158  -3.016  -8.412  1.00  1.00      1S   
ATOM   4582 HN   ILE   307     -22.985  -3.541  -8.606  1.00  0.00      1S   
ATOM   4583 CA   ILE   307     -21.772  -2.067  -9.445  1.00  1.00      1S   
ATOM   4584 HA   ILE   307     -20.795  -2.363  -9.802  1.00  0.00      1S   
ATOM   4585 CB   ILE   307     -22.750  -2.092 -10.622  1.00  1.00      1S   
ATOM   4586 HB   ILE   307     -23.788  -2.018 -10.230  1.00  0.00      1S   
ATOM   4587 CG2  ILE   307     -22.527  -0.895 -11.574  1.00  1.00      1S   
ATOM   4588 HG21 ILE   307     -21.481  -0.892 -11.944  1.00  0.00      1S   
ATOM   4589 HG22 ILE   307     -22.730   0.071 -11.070  1.00  0.00      1S   
ATOM   4590 HG23 ILE   307     -23.215  -0.951 -12.443  1.00  0.00      1S   
ATOM   4591 CG1  ILE   307     -22.620  -3.440 -11.373  1.00  1.00      1S   
ATOM   4592 HG11 ILE   307     -22.700  -4.277 -10.647  1.00  0.00      1S   
ATOM   4593 HG12 ILE   307     -21.611  -3.499 -11.835  1.00  0.00      1S   
ATOM   4594 CD   ILE   307     -23.685  -3.645 -12.454  1.00  1.00      1S   
ATOM   4595 HD1  ILE   307     -23.540  -2.935 -13.296  1.00  0.00      1S   
ATOM   4596 HD2  ILE   307     -24.700  -3.494 -12.031  1.00  0.00      1S   
ATOM   4597 HD3  ILE   307     -23.627  -4.677 -12.859  1.00  0.00      1S   
ATOM   4598 C    ILE   307     -21.641  -0.663  -8.889  1.00  1.00      1S   
ATOM   4599 O    ILE   307     -20.630   0.003  -9.109  1.00  1.00      1S   
ATOM   4600 N    PHE   308     -22.651  -0.188  -8.127  1.00  1.00      1S   
ATOM   4601 HN   PHE   308     -23.463  -0.739  -7.942  1.00  0.00      1S   
ATOM   4602 CA   PHE   308     -22.642   1.148  -7.570  1.00  1.00      1S   
ATOM   4603 HA   PHE   308     -22.276   1.824  -8.333  1.00  0.00      1S   
ATOM   4604 CB   PHE   308     -24.047   1.613  -7.118  1.00  1.00      1S   
ATOM   4605 HB1  PHE   308     -23.987   2.486  -6.434  1.00  0.00      1S   
ATOM   4606 HB2  PHE   308     -24.593   0.790  -6.609  1.00  0.00      1S   
ATOM   4607 CG   PHE   308     -24.815   2.048  -8.329  1.00  1.00      1S   
ATOM   4608 CD1  PHE   308     -25.522   1.121  -9.100  1.00  1.00      1S   
ATOM   4609 HD1  PHE   308     -25.562   0.096  -8.804  1.00  0.00      1S   
ATOM   4610 CE1  PHE   308     -26.183   1.508 -10.261  1.00  1.00      1S   
ATOM   4611 HE1  PHE   308     -26.696   0.767 -10.842  1.00  0.00      1S   
ATOM   4612 CZ   PHE   308     -26.157   2.841 -10.663  1.00  1.00      1S   
ATOM   4613 HZ   PHE   308     -26.692   3.126 -11.544  1.00  0.00      1S   
ATOM   4614 CD2  PHE   308     -24.788   3.387  -8.747  1.00  1.00      1S   
ATOM   4615 HD2  PHE   308     -24.252   4.111  -8.163  1.00  0.00      1S   
ATOM   4616 CE2  PHE   308     -25.447   3.784  -9.915  1.00  1.00      1S   
ATOM   4617 HE2  PHE   308     -25.394   4.804 -10.248  1.00  0.00      1S   
ATOM   4618 C    PHE   308     -21.680   1.265  -6.415  1.00  1.00      1S   
ATOM   4619 O    PHE   308     -21.134   2.341  -6.188  1.00  1.00      1S   
ATOM   4620 N    LYS   309     -21.417   0.164  -5.670  1.00  1.00      1S   
ATOM   4621 HN   LYS   309     -21.903  -0.695  -5.830  1.00  0.00      1S   
ATOM   4622 CA   LYS   309     -20.429   0.138  -4.609  1.00  1.00      1S   
ATOM   4623 HA   LYS   309     -20.597   1.006  -3.990  1.00  0.00      1S   
ATOM   4624 CB   LYS   309     -20.500  -1.149  -3.747  1.00  1.00      1S   
ATOM   4625 HB1  LYS   309     -19.562  -1.272  -3.159  1.00  0.00      1S   
ATOM   4626 HB2  LYS   309     -20.594  -2.029  -4.419  1.00  0.00      1S   
ATOM   4627 CG   LYS   309     -21.664  -1.150  -2.742  1.00  1.00      1S   
ATOM   4628 HG1  LYS   309     -21.756  -2.164  -2.293  1.00  0.00      1S   
ATOM   4629 HG2  LYS   309     -22.612  -0.927  -3.278  1.00  0.00      1S   
ATOM   4630 CD   LYS   309     -21.472  -0.124  -1.613  1.00  1.00      1S   
ATOM   4631 HD1  LYS   309     -21.254   0.869  -2.064  1.00  0.00      1S   
ATOM   4632 HD2  LYS   309     -20.589  -0.419  -1.003  1.00  0.00      1S   
ATOM   4633 CE   LYS   309     -22.701   0.034  -0.716  1.00  1.00      1S   
ATOM   4634 HE1  LYS   309     -22.910  -0.897  -0.152  1.00  0.00      1S   
ATOM   4635 HE2  LYS   309     -23.588   0.298  -1.331  1.00  0.00      1S   
ATOM   4636 NZ   LYS   309     -22.487   1.131   0.254  1.00  1.00      1S   
ATOM   4637 HZ1  LYS   309     -22.032   1.933  -0.232  1.00  0.00      1S   
ATOM   4638 HZ2  LYS   309     -21.870   0.802   1.022  1.00  0.00      1S   
ATOM   4639 HZ3  LYS   309     -23.401   1.439   0.644  1.00  0.00      1S   
ATOM   4640 C    LYS   309     -19.035   0.274  -5.164  1.00  1.00      1S   
ATOM   4641 O    LYS   309     -18.192   0.932  -4.560  1.00  1.00      1S   
ATOM   4642 N    GLU   310     -18.769  -0.312  -6.350  1.00  1.00      1S   
ATOM   4643 HN   GLU   310     -19.454  -0.883  -6.803  1.00  0.00      1S   
ATOM   4644 CA   GLU   310     -17.512  -0.177  -7.048  1.00  1.00      1S   
ATOM   4645 HA   GLU   310     -16.717  -0.377  -6.344  1.00  0.00      1S   
ATOM   4646 CB   GLU   310     -17.402  -1.157  -8.231  1.00  1.00      1S   
ATOM   4647 HB1  GLU   310     -16.535  -0.893  -8.879  1.00  0.00      1S   
ATOM   4648 HB2  GLU   310     -18.319  -1.077  -8.856  1.00  0.00      1S   
ATOM   4649 CG   GLU   310     -17.241  -2.619  -7.780  1.00  1.00      1S   
ATOM   4650 HG1  GLU   310     -17.290  -3.255  -8.679  1.00  0.00      1S   
ATOM   4651 HG2  GLU   310     -18.072  -2.911  -7.109  1.00  0.00      1S   
ATOM   4652 CD   GLU   310     -15.909  -2.878  -7.070  1.00  1.00      1S   
ATOM   4653 OE1  GLU   310     -14.932  -2.121  -7.303  1.00  1.00      1S   
ATOM   4654 OE2  GLU   310     -15.853  -3.851  -6.271  1.00  1.00      1S   
ATOM   4655 C    GLU   310     -17.308   1.218  -7.579  1.00  1.00      1S   
ATOM   4656 O    GLU   310     -16.194   1.734  -7.530  1.00  1.00      1S   
ATOM   4657 N    ALA   311     -18.378   1.880  -8.079  1.00  1.00      1S   
ATOM   4658 HN   ALA   311     -19.273   1.442  -8.146  1.00  0.00      1S   
ATOM   4659 CA   ALA   311     -18.304   3.244  -8.557  1.00  1.00      1S   
ATOM   4660 HA   ALA   311     -17.454   3.313  -9.217  1.00  0.00      1S   
ATOM   4661 CB   ALA   311     -19.563   3.676  -9.327  1.00  1.00      1S   
ATOM   4662 HB1  ALA   311     -20.465   3.619  -8.682  1.00  0.00      1S   
ATOM   4663 HB2  ALA   311     -19.714   3.010 -10.204  1.00  0.00      1S   
ATOM   4664 HB3  ALA   311     -19.455   4.717  -9.701  1.00  0.00      1S   
ATOM   4665 C    ALA   311     -18.056   4.206  -7.427  1.00  1.00      1S   
ATOM   4666 O    ALA   311     -17.257   5.126  -7.561  1.00  1.00      1S   
ATOM   4667 N    GLU   312     -18.694   3.980  -6.257  1.00  1.00      1S   
ATOM   4668 HN   GLU   312     -19.377   3.255  -6.183  1.00  0.00      1S   
ATOM   4669 CA   GLU   312     -18.449   4.720  -5.037  1.00  1.00      1S   
ATOM   4670 HA   GLU   312     -18.642   5.765  -5.236  1.00  0.00      1S   
ATOM   4671 CB   GLU   312     -19.382   4.242  -3.900  1.00  1.00      1S   
ATOM   4672 HB1  GLU   312     -19.314   3.136  -3.814  1.00  0.00      1S   
ATOM   4673 HB2  GLU   312     -20.426   4.489  -4.199  1.00  0.00      1S   
ATOM   4674 CG   GLU   312     -19.094   4.869  -2.523  1.00  1.00      1S   
ATOM   4675 HG1  GLU   312     -19.087   5.976  -2.612  1.00  0.00      1S   
ATOM   4676 HG2  GLU   312     -18.102   4.537  -2.147  1.00  0.00      1S   
ATOM   4677 CD   GLU   312     -20.161   4.439  -1.520  1.00  1.00      1S   
ATOM   4678 OE1  GLU   312     -20.257   3.217  -1.229  1.00  1.00      1S   
ATOM   4679 OE2  GLU   312     -20.907   5.326  -1.034  1.00  1.00      1S   
ATOM   4680 C    GLU   312     -17.006   4.596  -4.618  1.00  1.00      1S   
ATOM   4681 O    GLU   312     -16.362   5.595  -4.315  1.00  1.00      1S   
ATOM   4682 N    LYS   313     -16.450   3.364  -4.657  1.00  1.00      1S   
ATOM   4683 HN   LYS   313     -17.003   2.569  -4.900  1.00  0.00      1S   
ATOM   4684 CA   LYS   313     -15.069   3.077  -4.340  1.00  1.00      1S   
ATOM   4685 HA   LYS   313     -14.905   3.411  -3.325  1.00  0.00      1S   
ATOM   4686 CB   LYS   313     -14.800   1.561  -4.417  1.00  1.00      1S   
ATOM   4687 HB1  LYS   313     -14.732   1.232  -5.477  1.00  0.00      1S   
ATOM   4688 HB2  LYS   313     -15.687   1.059  -3.971  1.00  0.00      1S   
ATOM   4689 CG   LYS   313     -13.553   1.089  -3.653  1.00  1.00      1S   
ATOM   4690 HG1  LYS   313     -13.669   1.355  -2.579  1.00  0.00      1S   
ATOM   4691 HG2  LYS   313     -12.657   1.623  -4.040  1.00  0.00      1S   
ATOM   4692 CD   LYS   313     -13.314  -0.428  -3.776  1.00  1.00      1S   
ATOM   4693 HD1  LYS   313     -12.414  -0.687  -3.174  1.00  0.00      1S   
ATOM   4694 HD2  LYS   313     -13.095  -0.662  -4.841  1.00  0.00      1S   
ATOM   4695 CE   LYS   313     -14.503  -1.280  -3.300  1.00  1.00      1S   
ATOM   4696 HE1  LYS   313     -15.422  -1.050  -3.880  1.00  0.00      1S   
ATOM   4697 HE2  LYS   313     -14.697  -1.093  -2.223  1.00  0.00      1S   
ATOM   4698 NZ   LYS   313     -14.242  -2.727  -3.475  1.00  1.00      1S   
ATOM   4699 HZ1  LYS   313     -13.281  -2.952  -3.149  1.00  0.00      1S   
ATOM   4700 HZ2  LYS   313     -14.341  -2.976  -4.482  1.00  0.00      1S   
ATOM   4701 HZ3  LYS   313     -14.935  -3.269  -2.919  1.00  0.00      1S   
ATOM   4702 C    LYS   313     -14.103   3.807  -5.249  1.00  1.00      1S   
ATOM   4703 O    LYS   313     -13.082   4.307  -4.784  1.00  1.00      1S   
ATOM   4704 N    PHE   314     -14.435   3.930  -6.561  1.00  1.00      1S   
ATOM   4705 HN   PHE   314     -15.259   3.486  -6.912  1.00  0.00      1S   
ATOM   4706 CA   PHE   314     -13.686   4.696  -7.542  1.00  1.00      1S   
ATOM   4707 HA   PHE   314     -12.690   4.278  -7.578  1.00  0.00      1S   
ATOM   4708 CB   PHE   314     -14.312   4.593  -8.972  1.00  1.00      1S   
ATOM   4709 HB1  PHE   314     -15.404   4.754  -8.925  1.00  0.00      1S   
ATOM   4710 HB2  PHE   314     -14.140   3.574  -9.380  1.00  0.00      1S   
ATOM   4711 CG   PHE   314     -13.749   5.598  -9.953  1.00  1.00      1S   
ATOM   4712 CD1  PHE   314     -12.471   5.429 -10.501  1.00  1.00      1S   
ATOM   4713 HD1  PHE   314     -11.913   4.539 -10.260  1.00  0.00      1S   
ATOM   4714 CE1  PHE   314     -11.912   6.412 -11.330  1.00  1.00      1S   
ATOM   4715 HE1  PHE   314     -10.922   6.275 -11.739  1.00  0.00      1S   
ATOM   4716 CZ   PHE   314     -12.636   7.576 -11.617  1.00  1.00      1S   
ATOM   4717 HZ   PHE   314     -12.211   8.338 -12.253  1.00  0.00      1S   
ATOM   4718 CD2  PHE   314     -14.467   6.770 -10.249  1.00  1.00      1S   
ATOM   4719 HD2  PHE   314     -15.441   6.925  -9.812  1.00  0.00      1S   
ATOM   4720 CE2  PHE   314     -13.912   7.755 -11.072  1.00  1.00      1S   
ATOM   4721 HE2  PHE   314     -14.468   8.654 -11.274  1.00  0.00      1S   
ATOM   4722 C    PHE   314     -13.554   6.146  -7.112  1.00  1.00      1S   
ATOM   4723 O    PHE   314     -12.452   6.687  -7.097  1.00  1.00      1S   
ATOM   4724 N    PHE   315     -14.668   6.819  -6.753  1.00  1.00      1S   
ATOM   4725 HN   PHE   315     -15.567   6.384  -6.763  1.00  0.00      1S   
ATOM   4726 CA   PHE   315     -14.630   8.223  -6.397  1.00  1.00      1S   
ATOM   4727 HA   PHE   315     -14.039   8.736  -7.145  1.00  0.00      1S   
ATOM   4728 CB   PHE   315     -16.034   8.859  -6.334  1.00  1.00      1S   
ATOM   4729 HB1  PHE   315     -15.988   9.895  -5.934  1.00  0.00      1S   
ATOM   4730 HB2  PHE   315     -16.713   8.254  -5.695  1.00  0.00      1S   
ATOM   4731 CG   PHE   315     -16.594   8.946  -7.723  1.00  1.00      1S   
ATOM   4732 CD1  PHE   315     -16.075   9.868  -8.647  1.00  1.00      1S   
ATOM   4733 HD1  PHE   315     -15.260  10.516  -8.370  1.00  0.00      1S   
ATOM   4734 CE1  PHE   315     -16.604   9.956  -9.936  1.00  1.00      1S   
ATOM   4735 HE1  PHE   315     -16.224  10.699 -10.615  1.00  0.00      1S   
ATOM   4736 CZ   PHE   315     -17.605   9.071 -10.342  1.00  1.00      1S   
ATOM   4737 HZ   PHE   315     -17.993   9.114 -11.346  1.00  0.00      1S   
ATOM   4738 CD2  PHE   315     -17.629   8.095  -8.129  1.00  1.00      1S   
ATOM   4739 HD2  PHE   315     -18.046   7.396  -7.423  1.00  0.00      1S   
ATOM   4740 CE2  PHE   315     -18.100   8.124  -9.444  1.00  1.00      1S   
ATOM   4741 HE2  PHE   315     -18.834   7.407  -9.768  1.00  0.00      1S   
ATOM   4742 C    PHE   315     -13.942   8.445  -5.073  1.00  1.00      1S   
ATOM   4743 O    PHE   315     -13.202   9.412  -4.914  1.00  1.00      1S   
ATOM   4744 N    VAL   316     -14.120   7.525  -4.099  1.00  1.00      1S   
ATOM   4745 HN   VAL   316     -14.730   6.745  -4.234  1.00  0.00      1S   
ATOM   4746 CA   VAL   316     -13.462   7.593  -2.809  1.00  1.00      1S   
ATOM   4747 HA   VAL   316     -13.656   8.572  -2.401  1.00  0.00      1S   
ATOM   4748 CB   VAL   316     -14.010   6.560  -1.828  1.00  1.00      1S   
ATOM   4749 HB   VAL   316     -14.016   5.556  -2.307  1.00  0.00      1S   
ATOM   4750 CG1  VAL   316     -13.159   6.485  -0.540  1.00  1.00      1S   
ATOM   4751 HG11 VAL   316     -13.013   7.502  -0.117  1.00  0.00      1S   
ATOM   4752 HG12 VAL   316     -12.165   6.035  -0.743  1.00  0.00      1S   
ATOM   4753 HG13 VAL   316     -13.670   5.857   0.219  1.00  0.00      1S   
ATOM   4754 CG2  VAL   316     -15.459   6.957  -1.477  1.00  1.00      1S   
ATOM   4755 HG21 VAL   316     -16.104   6.996  -2.377  1.00  0.00      1S   
ATOM   4756 HG22 VAL   316     -15.476   7.959  -0.998  1.00  0.00      1S   
ATOM   4757 HG23 VAL   316     -15.894   6.221  -0.768  1.00  0.00      1S   
ATOM   4758 C    VAL   316     -11.959   7.478  -2.959  1.00  1.00      1S   
ATOM   4759 O    VAL   316     -11.212   8.120  -2.221  1.00  1.00      1S   
ATOM   4760 N    SER   317     -11.476   6.700  -3.958  1.00  1.00      1S   
ATOM   4761 HN   SER   317     -12.095   6.203  -4.564  1.00  0.00      1S   
ATOM   4762 CA   SER   317     -10.063   6.481  -4.185  1.00  1.00      1S   
ATOM   4763 HA   SER   317      -9.661   6.135  -3.243  1.00  0.00      1S   
ATOM   4764 CB   SER   317      -9.783   5.356  -5.224  1.00  1.00      1S   
ATOM   4765 HB1  SER   317     -10.440   4.485  -5.014  1.00  0.00      1S   
ATOM   4766 HB2  SER   317      -8.733   5.026  -5.110  1.00  0.00      1S   
ATOM   4767 OG   SER   317      -9.957   5.752  -6.581  1.00  1.00      1S   
ATOM   4768 HG1  SER   317     -10.896   5.937  -6.700  1.00  0.00      1S   
ATOM   4769 C    SER   317      -9.315   7.749  -4.550  1.00  1.00      1S   
ATOM   4770 O    SER   317      -8.123   7.864  -4.275  1.00  1.00      1S   
ATOM   4771 N    VAL   318     -10.012   8.738  -5.164  1.00  1.00      1S   
ATOM   4772 HN   VAL   318     -10.985   8.640  -5.364  1.00  0.00      1S   
ATOM   4773 CA   VAL   318      -9.408   9.983  -5.577  1.00  1.00      1S   
ATOM   4774 HA   VAL   318      -8.334   9.857  -5.576  1.00  0.00      1S   
ATOM   4775 CB   VAL   318      -9.768  10.387  -7.006  1.00  1.00      1S   
ATOM   4776 HB   VAL   318      -9.132  11.254  -7.301  1.00  0.00      1S   
ATOM   4777 CG1  VAL   318      -9.424   9.215  -7.950  1.00  1.00      1S   
ATOM   4778 HG11 VAL   318     -10.113   8.359  -7.787  1.00  0.00      1S   
ATOM   4779 HG12 VAL   318      -8.383   8.871  -7.780  1.00  0.00      1S   
ATOM   4780 HG13 VAL   318      -9.520   9.538  -9.008  1.00  0.00      1S   
ATOM   4781 CG2  VAL   318     -11.240  10.812  -7.155  1.00  1.00      1S   
ATOM   4782 HG21 VAL   318     -11.474  11.684  -6.511  1.00  0.00      1S   
ATOM   4783 HG22 VAL   318     -11.913   9.972  -6.894  1.00  0.00      1S   
ATOM   4784 HG23 VAL   318     -11.441  11.098  -8.210  1.00  0.00      1S   
ATOM   4785 C    VAL   318      -9.701  11.093  -4.583  1.00  1.00      1S   
ATOM   4786 O    VAL   318      -9.332  12.239  -4.811  1.00  1.00      1S   
ATOM   4787 N    GLY   319     -10.332  10.797  -3.422  1.00  1.00      1S   
ATOM   4788 HN   GLY   319     -10.664   9.875  -3.229  1.00  0.00      1S   
ATOM   4789 CA   GLY   319     -10.414  11.748  -2.327  1.00  1.00      1S   
ATOM   4790 HA1  GLY   319      -9.676  12.528  -2.458  1.00  0.00      1S   
ATOM   4791 HA2  GLY   319     -10.252  11.187  -1.419  1.00  0.00      1S   
ATOM   4792 C    GLY   319     -11.753  12.417  -2.218  1.00  1.00      1S   
ATOM   4793 O    GLY   319     -11.902  13.379  -1.467  1.00  1.00      1S   
ATOM   4794 N    LEU   320     -12.765  11.926  -2.964  1.00  1.00      1S   
ATOM   4795 HN   LEU   320     -12.636  11.121  -3.539  1.00  0.00      1S   
ATOM   4796 CA   LEU   320     -14.085  12.514  -3.010  1.00  1.00      1S   
ATOM   4797 HA   LEU   320     -14.027  13.550  -2.712  1.00  0.00      1S   
ATOM   4798 CB   LEU   320     -14.686  12.387  -4.428  1.00  1.00      1S   
ATOM   4799 HB1  LEU   320     -15.775  12.592  -4.424  1.00  0.00      1S   
ATOM   4800 HB2  LEU   320     -14.562  11.340  -4.769  1.00  0.00      1S   
ATOM   4801 CG   LEU   320     -14.027  13.330  -5.454  1.00  1.00      1S   
ATOM   4802 HG   LEU   320     -12.922  13.201  -5.376  1.00  0.00      1S   
ATOM   4803 CD1  LEU   320     -14.433  12.954  -6.886  1.00  1.00      1S   
ATOM   4804 HD11 LEU   320     -15.290  13.576  -7.216  1.00  0.00      1S   
ATOM   4805 HD12 LEU   320     -14.728  11.887  -6.922  1.00  0.00      1S   
ATOM   4806 HD13 LEU   320     -13.593  13.120  -7.592  1.00  0.00      1S   
ATOM   4807 CD2  LEU   320     -14.374  14.799  -5.168  1.00  1.00      1S   
ATOM   4808 HD21 LEU   320     -13.984  15.120  -4.180  1.00  0.00      1S   
ATOM   4809 HD22 LEU   320     -15.478  14.933  -5.170  1.00  0.00      1S   
ATOM   4810 HD23 LEU   320     -13.939  15.458  -5.948  1.00  0.00      1S   
ATOM   4811 C    LEU   320     -14.962  11.784  -2.033  1.00  1.00      1S   
ATOM   4812 O    LEU   320     -14.625  10.660  -1.662  1.00  1.00      1S   
ATOM   4813 N    PRO   321     -16.079  12.344  -1.559  1.00  1.00      1S   
ATOM   4814 CD   PRO   321     -16.604  13.668  -1.911  1.00  1.00      1S   
ATOM   4815 HD1  PRO   321     -16.627  13.826  -3.008  1.00  0.00      1S   
ATOM   4816 HD2  PRO   321     -15.974  14.444  -1.426  1.00  0.00      1S   
ATOM   4817 CA   PRO   321     -16.866  11.714  -0.520  1.00  1.00      1S   
ATOM   4818 HA   PRO   321     -16.225  11.422   0.300  1.00  0.00      1S   
ATOM   4819 CB   PRO   321     -17.910  12.775  -0.119  1.00  1.00      1S   
ATOM   4820 HB1  PRO   321     -17.514  13.369   0.734  1.00  0.00      1S   
ATOM   4821 HB2  PRO   321     -18.891  12.346   0.172  1.00  0.00      1S   
ATOM   4822 CG   PRO   321     -18.024  13.688  -1.341  1.00  1.00      1S   
ATOM   4823 HG1  PRO   321     -18.729  13.230  -2.069  1.00  0.00      1S   
ATOM   4824 HG2  PRO   321     -18.371  14.708  -1.088  1.00  0.00      1S   
ATOM   4825 C    PRO   321     -17.544  10.489  -1.064  1.00  1.00      1S   
ATOM   4826 O    PRO   321     -17.723  10.348  -2.274  1.00  1.00      1S   
ATOM   4827 N    ASN   322     -17.947   9.599  -0.145  1.00  1.00      1S   
ATOM   4828 HN   ASN   322     -17.753   9.739   0.823  1.00  0.00      1S   
ATOM   4829 CA   ASN   322     -18.814   8.490  -0.422  1.00  1.00      1S   
ATOM   4830 HA   ASN   322     -18.496   8.026  -1.345  1.00  0.00      1S   
ATOM   4831 CB   ASN   322     -18.793   7.411   0.705  1.00  1.00      1S   
ATOM   4832 HB1  ASN   322     -17.866   6.810   0.576  1.00  0.00      1S   
ATOM   4833 HB2  ASN   322     -19.653   6.718   0.606  1.00  0.00      1S   
ATOM   4834 CG   ASN   322     -18.789   7.987   2.135  1.00  1.00      1S   
ATOM   4835 OD1  ASN   322     -19.053   9.165   2.393  1.00  1.00      1S   
ATOM   4836 ND2  ASN   322     -18.457   7.091   3.112  1.00  1.00      1S   
ATOM   4837 HD21 ASN   322     -18.403   7.402   4.060  1.00  0.00      1S   
ATOM   4838 HD22 ASN   322     -18.270   6.139   2.875  1.00  0.00      1S   
ATOM   4839 C    ASN   322     -20.203   9.032  -0.640  1.00  1.00      1S   
ATOM   4840 O    ASN   322     -20.477  10.217  -0.447  1.00  1.00      1S   
ATOM   4841 N    MET   323     -21.128   8.160  -1.068  1.00  1.00      1S   
ATOM   4842 HN   MET   323     -20.918   7.193  -1.220  1.00  0.00      1S   
ATOM   4843 CA   MET   323     -22.499   8.532  -1.262  1.00  1.00      1S   
ATOM   4844 HA   MET   323     -22.546   9.482  -1.774  1.00  0.00      1S   
ATOM   4845 CB   MET   323     -23.264   7.465  -2.064  1.00  1.00      1S   
ATOM   4846 HB1  MET   323     -24.337   7.741  -2.122  1.00  0.00      1S   
ATOM   4847 HB2  MET   323     -23.194   6.495  -1.528  1.00  0.00      1S   
ATOM   4848 CG   MET   323     -22.739   7.255  -3.495  1.00  1.00      1S   
ATOM   4849 HG1  MET   323     -23.223   6.330  -3.881  1.00  0.00      1S   
ATOM   4850 HG2  MET   323     -21.646   7.052  -3.473  1.00  0.00      1S   
ATOM   4851 SD   MET   323     -23.125   8.631  -4.625  1.00  1.00      1S   
ATOM   4852 CE   MET   323     -21.559   9.544  -4.514  1.00  1.00      1S   
ATOM   4853 HE1  MET   323     -20.701   8.898  -4.800  1.00  0.00      1S   
ATOM   4854 HE2  MET   323     -21.372   9.925  -3.489  1.00  0.00      1S   
ATOM   4855 HE3  MET   323     -21.573  10.419  -5.198  1.00  0.00      1S   
ATOM   4856 C    MET   323     -23.145   8.682   0.081  1.00  1.00      1S   
ATOM   4857 O    MET   323     -22.725   8.072   1.065  1.00  1.00      1S   
ATOM   4858 N    THR   324     -24.200   9.522   0.143  1.00  1.00      1S   
ATOM   4859 HN   THR   324     -24.510  10.032  -0.655  1.00  0.00      1S   
ATOM   4860 CA   THR   324     -24.957   9.741   1.352  1.00  1.00      1S   
ATOM   4861 HA   THR   324     -24.253   9.927   2.151  1.00  0.00      1S   
ATOM   4862 CB   THR   324     -25.904  10.942   1.257  1.00  1.00      1S   
ATOM   4863 HB   THR   324     -26.394  11.110   2.242  1.00  0.00      1S   
ATOM   4864 OG1  THR   324     -26.917  10.757   0.272  1.00  1.00      1S   
ATOM   4865 HG1  THR   324     -27.466  11.544   0.307  1.00  0.00      1S   
ATOM   4866 CG2  THR   324     -25.102  12.203   0.879  1.00  1.00      1S   
ATOM   4867 HG21 THR   324     -24.719  12.136  -0.162  1.00  0.00      1S   
ATOM   4868 HG22 THR   324     -24.241  12.341   1.565  1.00  0.00      1S   
ATOM   4869 HG23 THR   324     -25.752  13.102   0.946  1.00  0.00      1S   
ATOM   4870 C    THR   324     -25.726   8.477   1.679  1.00  1.00      1S   
ATOM   4871 O    THR   324     -25.897   7.598   0.835  1.00  1.00      1S   
ATOM   4872 N    GLN   325     -26.224   8.354   2.927  1.00  1.00      1S   
ATOM   4873 HN   GLN   325     -26.044   9.035   3.632  1.00  0.00      1S   
ATOM   4874 CA   GLN   325     -27.050   7.235   3.324  1.00  1.00      1S   
ATOM   4875 HA   GLN   325     -26.539   6.321   3.052  1.00  0.00      1S   
ATOM   4876 CB   GLN   325     -27.305   7.242   4.847  1.00  1.00      1S   
ATOM   4877 HB1  GLN   325     -27.764   8.215   5.133  1.00  0.00      1S   
ATOM   4878 HB2  GLN   325     -26.318   7.170   5.358  1.00  0.00      1S   
ATOM   4879 CG   GLN   325     -28.201   6.089   5.336  1.00  1.00      1S   
ATOM   4880 HG1  GLN   325     -27.731   5.115   5.082  1.00  0.00      1S   
ATOM   4881 HG2  GLN   325     -29.194   6.143   4.842  1.00  0.00      1S   
ATOM   4882 CD   GLN   325     -28.407   6.173   6.850  1.00  1.00      1S   
ATOM   4883 OE1  GLN   325     -27.829   7.021   7.538  1.00  1.00      1S   
ATOM   4884 NE2  GLN   325     -29.267   5.252   7.378  1.00  1.00      1S   
ATOM   4885 HE21 GLN   325     -29.829   4.694   6.759  1.00  0.00      1S   
ATOM   4886 HE22 GLN   325     -29.396   5.202   8.363  1.00  0.00      1S   
ATOM   4887 C    GLN   325     -28.370   7.283   2.590  1.00  1.00      1S   
ATOM   4888 O    GLN   325     -28.906   6.249   2.192  1.00  1.00      1S   
ATOM   4889 N    GLY   326     -28.885   8.513   2.347  1.00  1.00      1S   
ATOM   4890 HN   GLY   326     -28.412   9.327   2.671  1.00  0.00      1S   
ATOM   4891 CA   GLY   326     -30.109   8.759   1.621  1.00  1.00      1S   
ATOM   4892 HA1  GLY   326     -30.278   9.825   1.632  1.00  0.00      1S   
ATOM   4893 HA2  GLY   326     -30.896   8.198   2.107  1.00  0.00      1S   
ATOM   4894 C    GLY   326     -30.030   8.314   0.189  1.00  1.00      1S   
ATOM   4895 O    GLY   326     -31.019   7.847  -0.359  1.00  1.00      1S   
ATOM   4896 N    PHE   327     -28.842   8.406  -0.454  1.00  1.00      1S   
ATOM   4897 HN   PHE   327     -28.054   8.834  -0.016  1.00  0.00      1S   
ATOM   4898 CA   PHE   327     -28.598   7.877  -1.781  1.00  1.00      1S   
ATOM   4899 HA   PHE   327     -29.285   8.365  -2.458  1.00  0.00      1S   
ATOM   4900 CB   PHE   327     -27.141   8.172  -2.242  1.00  1.00      1S   
ATOM   4901 HB1  PHE   327     -26.426   7.832  -1.470  1.00  0.00      1S   
ATOM   4902 HB2  PHE   327     -27.011   9.269  -2.368  1.00  0.00      1S   
ATOM   4903 CG   PHE   327     -26.763   7.497  -3.538  1.00  1.00      1S   
ATOM   4904 CD1  PHE   327     -26.206   6.203  -3.524  1.00  1.00      1S   
ATOM   4905 HD1  PHE   327     -26.026   5.706  -2.583  1.00  0.00      1S   
ATOM   4906 CE1  PHE   327     -25.889   5.548  -4.718  1.00  1.00      1S   
ATOM   4907 HE1  PHE   327     -25.469   4.553  -4.693  1.00  0.00      1S   
ATOM   4908 CZ   PHE   327     -26.109   6.190  -5.940  1.00  1.00      1S   
ATOM   4909 HZ   PHE   327     -25.863   5.688  -6.864  1.00  0.00      1S   
ATOM   4910 CD2  PHE   327     -26.974   8.134  -4.767  1.00  1.00      1S   
ATOM   4911 HD2  PHE   327     -27.397   9.127  -4.797  1.00  0.00      1S   
ATOM   4912 CE2  PHE   327     -26.642   7.485  -5.960  1.00  1.00      1S   
ATOM   4913 HE2  PHE   327     -26.801   7.991  -6.893  1.00  0.00      1S   
ATOM   4914 C    PHE   327     -28.898   6.392  -1.820  1.00  1.00      1S   
ATOM   4915 O    PHE   327     -29.676   5.943  -2.653  1.00  1.00      1S   
ATOM   4916 N    TRP   328     -28.314   5.591  -0.904  1.00  1.00      1S   
ATOM   4917 HN   TRP   328     -27.701   5.956  -0.207  1.00  0.00      1S   
ATOM   4918 CA   TRP   328     -28.501   4.155  -0.909  1.00  1.00      1S   
ATOM   4919 HA   TRP   328     -28.310   3.806  -1.915  1.00  0.00      1S   
ATOM   4920 CB   TRP   328     -27.524   3.445   0.055  1.00  1.00      1S   
ATOM   4921 HB1  TRP   328     -27.746   2.356   0.070  1.00  0.00      1S   
ATOM   4922 HB2  TRP   328     -27.661   3.847   1.083  1.00  0.00      1S   
ATOM   4923 CG   TRP   328     -26.072   3.604  -0.351  1.00  1.00      1S   
ATOM   4924 CD1  TRP   328     -25.085   4.350   0.233  1.00  1.00      1S   
ATOM   4925 HD1  TRP   328     -25.213   4.953   1.120  1.00  0.00      1S   
ATOM   4926 NE1  TRP   328     -23.914   4.232  -0.479  1.00  1.00      1S   
ATOM   4927 HE1  TRP   328     -23.067   4.689  -0.285  1.00  0.00      1S   
ATOM   4928 CE2  TRP   328     -24.137   3.416  -1.562  1.00  1.00      1S   
ATOM   4929 CD2  TRP   328     -25.480   2.983  -1.511  1.00  1.00      1S   
ATOM   4930 CE3  TRP   328     -25.999   2.121  -2.474  1.00  1.00      1S   
ATOM   4931 HE3  TRP   328     -27.022   1.780  -2.457  1.00  0.00      1S   
ATOM   4932 CZ3  TRP   328     -25.137   1.675  -3.487  1.00  1.00      1S   
ATOM   4933 HZ3  TRP   328     -25.501   0.988  -4.238  1.00  0.00      1S   
ATOM   4934 CZ2  TRP   328     -23.299   3.000  -2.588  1.00  1.00      1S   
ATOM   4935 HZ2  TRP   328     -22.278   3.327  -2.667  1.00  0.00      1S   
ATOM   4936 CH2  TRP   328     -23.809   2.111  -3.535  1.00  1.00      1S   
ATOM   4937 HH2  TRP   328     -23.159   1.748  -4.308  1.00  0.00      1S   
ATOM   4938 C    TRP   328     -29.919   3.757  -0.560  1.00  1.00      1S   
ATOM   4939 O    TRP   328     -30.424   2.757  -1.064  1.00  1.00      1S   
ATOM   4940 N    GLU   329     -30.600   4.553   0.291  1.00  1.00      1S   
ATOM   4941 HN   GLU   329     -30.168   5.361   0.689  1.00  0.00      1S   
ATOM   4942 CA   GLU   329     -31.954   4.299   0.726  1.00  1.00      1S   
ATOM   4943 HA   GLU   329     -32.048   3.244   0.945  1.00  0.00      1S   
ATOM   4944 CB   GLU   329     -32.267   5.103   2.012  1.00  1.00      1S   
ATOM   4945 HB1  GLU   329     -33.303   5.508   2.015  1.00  0.00      1S   
ATOM   4946 HB2  GLU   329     -31.574   5.973   2.039  1.00  0.00      1S   
ATOM   4947 CG   GLU   329     -32.094   4.240   3.278  1.00  1.00      1S   
ATOM   4948 HG1  GLU   329     -31.270   3.513   3.115  1.00  0.00      1S   
ATOM   4949 HG2  GLU   329     -33.029   3.670   3.468  1.00  0.00      1S   
ATOM   4950 CD   GLU   329     -31.755   5.067   4.517  1.00  1.00      1S   
ATOM   4951 OE1  GLU   329     -31.345   4.431   5.526  1.00  1.00      1S   
ATOM   4952 OE2  GLU   329     -31.880   6.319   4.481  1.00  1.00      1S   
ATOM   4953 C    GLU   329     -32.977   4.627  -0.336  1.00  1.00      1S   
ATOM   4954 O    GLU   329     -33.943   3.886  -0.506  1.00  1.00      1S   
ATOM   4955 N    ASN   330     -32.807   5.761  -1.050  1.00  1.00      1S   
ATOM   4956 HN   ASN   330     -31.984   6.317  -0.943  1.00  0.00      1S   
ATOM   4957 CA   ASN   330     -33.871   6.362  -1.826  1.00  1.00      1S   
ATOM   4958 HA   ASN   330     -34.811   5.884  -1.582  1.00  0.00      1S   
ATOM   4959 CB   ASN   330     -34.007   7.874  -1.545  1.00  1.00      1S   
ATOM   4960 HB1  ASN   330     -34.836   8.291  -2.151  1.00  0.00      1S   
ATOM   4961 HB2  ASN   330     -33.066   8.401  -1.811  1.00  0.00      1S   
ATOM   4962 CG   ASN   330     -34.351   8.099  -0.069  1.00  1.00      1S   
ATOM   4963 OD1  ASN   330     -35.223   7.421   0.484  1.00  1.00      1S   
ATOM   4964 ND2  ASN   330     -33.657   9.082   0.576  1.00  1.00      1S   
ATOM   4965 HD21 ASN   330     -33.813   9.232   1.550  1.00  0.00      1S   
ATOM   4966 HD22 ASN   330     -32.973   9.616   0.079  1.00  0.00      1S   
ATOM   4967 C    ASN   330     -33.683   6.206  -3.309  1.00  1.00      1S   
ATOM   4968 O    ASN   330     -34.631   6.422  -4.062  1.00  1.00      1S   
ATOM   4969 N    SER   331     -32.475   5.823  -3.785  1.00  1.00      1S   
ATOM   4970 HN   SER   331     -31.700   5.656  -3.178  1.00  0.00      1S   
ATOM   4971 CA   SER   331     -32.235   5.612  -5.199  1.00  1.00      1S   
ATOM   4972 HA   SER   331     -32.614   6.468  -5.743  1.00  0.00      1S   
ATOM   4973 CB   SER   331     -30.742   5.408  -5.542  1.00  1.00      1S   
ATOM   4974 HB1  SER   331     -30.612   5.157  -6.613  1.00  0.00      1S   
ATOM   4975 HB2  SER   331     -30.314   4.579  -4.939  1.00  0.00      1S   
ATOM   4976 OG   SER   331     -29.999   6.591  -5.291  1.00  1.00      1S   
ATOM   4977 HG1  SER   331     -29.768   6.556  -4.355  1.00  0.00      1S   
ATOM   4978 C    SER   331     -32.957   4.377  -5.673  1.00  1.00      1S   
ATOM   4979 O    SER   331     -33.256   3.478  -4.889  1.00  1.00      1S   
ATOM   4980 N    MET   332     -33.251   4.316  -6.988  1.00  1.00      1S   
ATOM   4981 HN   MET   332     -33.025   5.066  -7.607  1.00  0.00      1S   
ATOM   4982 CA   MET   332     -33.798   3.138  -7.610  1.00  1.00      1S   
ATOM   4983 HA   MET   332     -33.978   2.364  -6.876  1.00  0.00      1S   
ATOM   4984 CB   MET   332     -35.113   3.415  -8.367  1.00  1.00      1S   
ATOM   4985 HB1  MET   332     -34.997   4.308  -9.018  1.00  0.00      1S   
ATOM   4986 HB2  MET   332     -35.882   3.660  -7.602  1.00  0.00      1S   
ATOM   4987 CG   MET   332     -35.586   2.225  -9.222  1.00  1.00      1S   
ATOM   4988 HG1  MET   332     -35.493   1.297  -8.616  1.00  0.00      1S   
ATOM   4989 HG2  MET   332     -34.895   2.119 -10.087  1.00  0.00      1S   
ATOM   4990 SD   MET   332     -37.283   2.368  -9.842  1.00  1.00      1S   
ATOM   4991 CE   MET   332     -38.087   2.162  -8.225  1.00  1.00      1S   
ATOM   4992 HE1  MET   332     -37.952   3.062  -7.588  1.00  0.00      1S   
ATOM   4993 HE2  MET   332     -37.673   1.287  -7.679  1.00  0.00      1S   
ATOM   4994 HE3  MET   332     -39.179   2.000  -8.351  1.00  0.00      1S   
ATOM   4995 C    MET   332     -32.741   2.655  -8.553  1.00  1.00      1S   
ATOM   4996 O    MET   332     -32.479   3.280  -9.576  1.00  1.00      1S   
ATOM   4997 N    LEU   333     -32.080   1.531  -8.199  1.00  1.00      1S   
ATOM   4998 HN   LEU   333     -32.317   1.030  -7.370  1.00  0.00      1S   
ATOM   4999 CA   LEU   333     -30.913   1.059  -8.906  1.00  1.00      1S   
ATOM   5000 HA   LEU   333     -30.597   1.802  -9.626  1.00  0.00      1S   
ATOM   5001 CB   LEU   333     -29.725   0.774  -7.962  1.00  1.00      1S   
ATOM   5002 HB1  LEU   333     -28.840   0.481  -8.570  1.00  0.00      1S   
ATOM   5003 HB2  LEU   333     -29.982  -0.081  -7.298  1.00  0.00      1S   
ATOM   5004 CG   LEU   333     -29.309   1.966  -7.066  1.00  1.00      1S   
ATOM   5005 HG   LEU   333     -30.174   2.224  -6.412  1.00  0.00      1S   
ATOM   5006 CD1  LEU   333     -28.148   1.545  -6.149  1.00  1.00      1S   
ATOM   5007 HD11 LEU   333     -27.263   1.268  -6.759  1.00  0.00      1S   
ATOM   5008 HD12 LEU   333     -28.441   0.667  -5.535  1.00  0.00      1S   
ATOM   5009 HD13 LEU   333     -27.866   2.377  -5.470  1.00  0.00      1S   
ATOM   5010 CD2  LEU   333     -28.939   3.231  -7.867  1.00  1.00      1S   
ATOM   5011 HD21 LEU   333     -29.807   3.603  -8.452  1.00  0.00      1S   
ATOM   5012 HD22 LEU   333     -28.104   3.017  -8.565  1.00  0.00      1S   
ATOM   5013 HD23 LEU   333     -28.619   4.039  -7.176  1.00  0.00      1S   
ATOM   5014 C    LEU   333     -31.198  -0.200  -9.677  1.00  1.00      1S   
ATOM   5015 O    LEU   333     -30.349  -0.633 -10.448  1.00  1.00      1S   
ATOM   5016 N    THR   334     -32.386  -0.822  -9.526  1.00  1.00      1S   
ATOM   5017 HN   THR   334     -33.077  -0.499  -8.884  1.00  0.00      1S   
ATOM   5018 CA   THR   334     -32.779  -1.937 -10.367  1.00  1.00      1S   
ATOM   5019 HA   THR   334     -32.125  -2.006 -11.226  1.00  0.00      1S   
ATOM   5020 CB   THR   334     -32.805  -3.296  -9.666  1.00  1.00      1S   
ATOM   5021 HB   THR   334     -33.200  -4.079 -10.352  1.00  0.00      1S   
ATOM   5022 OG1  THR   334     -33.608  -3.278  -8.489  1.00  1.00      1S   
ATOM   5023 HG1  THR   334     -34.519  -3.230  -8.790  1.00  0.00      1S   
ATOM   5024 CG2  THR   334     -31.368  -3.690  -9.280  1.00  1.00      1S   
ATOM   5025 HG21 THR   334     -30.934  -2.951  -8.573  1.00  0.00      1S   
ATOM   5026 HG22 THR   334     -30.730  -3.732 -10.188  1.00  0.00      1S   
ATOM   5027 HG23 THR   334     -31.354  -4.688  -8.793  1.00  0.00      1S   
ATOM   5028 C    THR   334     -34.148  -1.617 -10.889  1.00  1.00      1S   
ATOM   5029 O    THR   334     -34.865  -0.802 -10.309  1.00  1.00      1S   
ATOM   5030 N    ASP   335     -34.554  -2.297 -11.992  1.00  1.00      1S   
ATOM   5031 HN   ASP   335     -33.931  -2.911 -12.468  1.00  0.00      1S   
ATOM   5032 CA   ASP   335     -35.891  -2.248 -12.548  1.00  1.00      1S   
ATOM   5033 HA   ASP   335     -36.072  -1.220 -12.824  1.00  0.00      1S   
ATOM   5034 CB   ASP   335     -35.991  -3.167 -13.801  1.00  1.00      1S   
ATOM   5035 HB1  ASP   335     -35.948  -4.234 -13.499  1.00  0.00      1S   
ATOM   5036 HB2  ASP   335     -35.113  -2.972 -14.451  1.00  0.00      1S   
ATOM   5037 CG   ASP   335     -37.256  -2.937 -14.634  1.00  1.00      1S   
ATOM   5038 OD1  ASP   335     -38.376  -3.075 -14.081  1.00  1.00      1S   
ATOM   5039 OD2  ASP   335     -37.106  -2.644 -15.850  1.00  1.00      1S   
ATOM   5040 C    ASP   335     -36.856  -2.735 -11.475  1.00  1.00      1S   
ATOM   5041 O    ASP   335     -36.594  -3.804 -10.922  1.00  1.00      1S   
ATOM   5042 N    PRO   336     -37.916  -2.016 -11.100  1.00  1.00      1S   
ATOM   5043 CD   PRO   336     -38.326  -0.758 -11.734  1.00  1.00      1S   
ATOM   5044 HD1  PRO   336     -38.486  -0.889 -12.825  1.00  0.00      1S   
ATOM   5045 HD2  PRO   336     -37.541   0.007 -11.551  1.00  0.00      1S   
ATOM   5046 CA   PRO   336     -38.677  -2.287  -9.885  1.00  1.00      1S   
ATOM   5047 HA   PRO   336     -38.012  -2.549  -9.074  1.00  0.00      1S   
ATOM   5048 CB   PRO   336     -39.397  -0.959  -9.633  1.00  1.00      1S   
ATOM   5049 HB1  PRO   336     -38.705  -0.295  -9.074  1.00  0.00      1S   
ATOM   5050 HB2  PRO   336     -40.324  -1.052  -9.042  1.00  0.00      1S   
ATOM   5051 CG   PRO   336     -39.621  -0.374 -11.026  1.00  1.00      1S   
ATOM   5052 HG1  PRO   336     -40.480  -0.877 -11.521  1.00  0.00      1S   
ATOM   5053 HG2  PRO   336     -39.795   0.719 -10.995  1.00  0.00      1S   
ATOM   5054 C    PRO   336     -39.682  -3.406 -10.065  1.00  1.00      1S   
ATOM   5055 O    PRO   336     -40.757  -3.351  -9.468  1.00  1.00      1S   
ATOM   5056 N    GLY   337     -39.366  -4.439 -10.869  1.00  1.00      1S   
ATOM   5057 HN   GLY   337     -38.475  -4.475 -11.320  1.00  0.00      1S   
ATOM   5058 CA   GLY   337     -40.263  -5.530 -11.136  1.00  1.00      1S   
ATOM   5059 HA1  GLY   337     -40.799  -5.787 -10.232  1.00  0.00      1S   
ATOM   5060 HA2  GLY   337     -39.665  -6.339 -11.529  1.00  0.00      1S   
ATOM   5061 C    GLY   337     -41.235  -5.111 -12.194  1.00  1.00      1S   
ATOM   5062 O    GLY   337     -41.078  -4.073 -12.834  1.00  1.00      1S   
ATOM   5063 N    ASN   338     -42.273  -5.942 -12.412  1.00  1.00      1S   
ATOM   5064 HN   ASN   338     -42.406  -6.761 -11.861  1.00  0.00      1S   
ATOM   5065 CA   ASN   338     -43.159  -5.784 -13.539  1.00  1.00      1S   
ATOM   5066 HA   ASN   338     -42.686  -5.126 -14.256  1.00  0.00      1S   
ATOM   5067 CB   ASN   338     -43.420  -7.155 -14.213  1.00  1.00      1S   
ATOM   5068 HB1  ASN   338     -44.101  -7.771 -13.591  1.00  0.00      1S   
ATOM   5069 HB2  ASN   338     -42.448  -7.691 -14.299  1.00  0.00      1S   
ATOM   5070 CG   ASN   338     -43.978  -6.989 -15.633  1.00  1.00      1S   
ATOM   5071 OD1  ASN   338     -43.837  -5.939 -16.265  1.00  1.00      1S   
ATOM   5072 ND2  ASN   338     -44.618  -8.075 -16.154  1.00  1.00      1S   
ATOM   5073 HD21 ASN   338     -45.013  -8.014 -17.068  1.00  0.00      1S   
ATOM   5074 HD22 ASN   338     -44.672  -8.923 -15.628  1.00  0.00      1S   
ATOM   5075 C    ASN   338     -44.467  -5.145 -13.132  1.00  1.00      1S   
ATOM   5076 O    ASN   338     -45.177  -4.617 -13.985  1.00  1.00      1S   
ATOM   5077 N    VAL   339     -44.824  -5.156 -11.821  1.00  1.00      1S   
ATOM   5078 HN   VAL   339     -44.247  -5.588 -11.132  1.00  0.00      1S   
ATOM   5079 CA   VAL   339     -46.056  -4.563 -11.328  1.00  1.00      1S   
ATOM   5080 HA   VAL   339     -46.872  -5.000 -11.889  1.00  0.00      1S   
ATOM   5081 CB   VAL   339     -46.298  -4.828  -9.842  1.00  1.00      1S   
ATOM   5082 HB   VAL   339     -45.446  -4.439  -9.241  1.00  0.00      1S   
ATOM   5083 CG1  VAL   339     -47.594  -4.129  -9.370  1.00  1.00      1S   
ATOM   5084 HG11 VAL   339     -48.442  -4.395 -10.036  1.00  0.00      1S   
ATOM   5085 HG12 VAL   339     -47.477  -3.025  -9.365  1.00  0.00      1S   
ATOM   5086 HG13 VAL   339     -47.845  -4.449  -8.337  1.00  0.00      1S   
ATOM   5087 CG2  VAL   339     -46.392  -6.352  -9.613  1.00  1.00      1S   
ATOM   5088 HG21 VAL   339     -45.449  -6.862  -9.896  1.00  0.00      1S   
ATOM   5089 HG22 VAL   339     -47.225  -6.780 -10.209  1.00  0.00      1S   
ATOM   5090 HG23 VAL   339     -46.589  -6.560  -8.539  1.00  0.00      1S   
ATOM   5091 C    VAL   339     -46.051  -3.074 -11.608  1.00  1.00      1S   
ATOM   5092 O    VAL   339     -46.907  -2.568 -12.333  1.00  1.00      1S   
ATOM   5093 N    GLN   340     -45.049  -2.352 -11.065  1.00  1.00      1S   
ATOM   5094 HN   GLN   340     -44.354  -2.777 -10.492  1.00  0.00      1S   
ATOM   5095 CA   GLN   340     -44.877  -0.943 -11.310  1.00  1.00      1S   
ATOM   5096 HA   GLN   340     -45.828  -0.501 -11.575  1.00  0.00      1S   
ATOM   5097 CB   GLN   340     -44.335  -0.196 -10.072  1.00  1.00      1S   
ATOM   5098 HB1  GLN   340     -45.158  -0.122  -9.326  1.00  0.00      1S   
ATOM   5099 HB2  GLN   340     -44.059   0.840 -10.367  1.00  0.00      1S   
ATOM   5100 CG   GLN   340     -43.145  -0.907  -9.399  1.00  1.00      1S   
ATOM   5101 HG1  GLN   340     -42.318  -1.039 -10.125  1.00  0.00      1S   
ATOM   5102 HG2  GLN   340     -43.451  -1.913  -9.040  1.00  0.00      1S   
ATOM   5103 CD   GLN   340     -42.632  -0.121  -8.189  1.00  1.00      1S   
ATOM   5104 OE1  GLN   340     -42.435  -0.686  -7.108  1.00  1.00      1S   
ATOM   5105 NE2  GLN   340     -42.387   1.206  -8.383  1.00  1.00      1S   
ATOM   5106 HE21 GLN   340     -42.494   1.607  -9.295  1.00  0.00      1S   
ATOM   5107 HE22 GLN   340     -42.068   1.767  -7.624  1.00  0.00      1S   
ATOM   5108 C    GLN   340     -43.931  -0.753 -12.468  1.00  1.00      1S   
ATOM   5109 O    GLN   340     -42.942  -1.470 -12.613  1.00  1.00      1S   
ATOM   5110 N    LYS   341     -44.245   0.235 -13.335  1.00  1.00      1S   
ATOM   5111 HN   LYS   341     -45.065   0.788 -13.213  1.00  0.00      1S   
ATOM   5112 CA   LYS   341     -43.438   0.568 -14.485  1.00  1.00      1S   
ATOM   5113 HA   LYS   341     -42.733  -0.227 -14.681  1.00  0.00      1S   
ATOM   5114 CB   LYS   341     -44.287   0.833 -15.751  1.00  1.00      1S   
ATOM   5115 HB1  LYS   341     -43.609   1.095 -16.594  1.00  0.00      1S   
ATOM   5116 HB2  LYS   341     -44.965   1.698 -15.578  1.00  0.00      1S   
ATOM   5117 CG   LYS   341     -45.147  -0.368 -16.186  1.00  1.00      1S   
ATOM   5118 HG1  LYS   341     -45.524  -0.160 -17.211  1.00  0.00      1S   
ATOM   5119 HG2  LYS   341     -46.031  -0.457 -15.516  1.00  0.00      1S   
ATOM   5120 CD   LYS   341     -44.390  -1.708 -16.169  1.00  1.00      1S   
ATOM   5121 HD1  LYS   341     -44.378  -2.086 -15.121  1.00  0.00      1S   
ATOM   5122 HD2  LYS   341     -43.332  -1.545 -16.474  1.00  0.00      1S   
ATOM   5123 CE   LYS   341     -45.006  -2.785 -17.062  1.00  1.00      1S   
ATOM   5124 HE1  LYS   341     -46.102  -2.856 -16.910  1.00  0.00      1S   
ATOM   5125 HE2  LYS   341     -44.540  -3.764 -16.837  1.00  0.00      1S   
ATOM   5126 NZ   LYS   341     -44.742  -2.491 -18.488  1.00  1.00      1S
[truncated: 342,747 more chars]
