# Supplementary material for: Genetic Uniformity of a Specific Region in SARS-CoV-2 Genome and In-Silico Target-Oriented Repurposing of N-Acetyl-D-Glucosamine
Source: Preprints.org preprint supplement (doi:10.20944/preprints202005.0397.v1), 2020-05-24
Supplement: Supplementary file 7 [file supplementary › S7 File/clusters.dock4.csv]

Cluster ClusterRank deltaG deltaGelec deltaGvdw deltaGligsolvnonpol deltaGligsolvpol deltaGprotsolvnonpol deltaGprotsolvpol deltaGcompsolvnonpol deltaGcompsolvpol extraFull surfFull solvFull IntraFull InterFull FullFitness SimpleFitness Energy
0 0 -6.569576 0.0 -30.5056 6.56504 -16.3419 355.646 -2902.69 355.976 -2904.39 0.0 355.976 -2904.39 59.6586 -30.5056 -2519.2607 1.33709 1.33709
0 1 -6.5191793 0.0 -29.1277 6.80349 -19.2098 355.646 -2902.69 355.746 -2907.84 0.0 355.746 -2907.84 70.1699 -29.1277 -2511.0518 6.44385 6.44385
0 2 -6.6624546 0.0 -32.4176 7.01927 -19.3055 355.646 -2902.69 355.715 -2904.81 0.0 355.715 -2904.81 70.5596 -32.4176 -2510.953 8.09675 8.09675
0 3 -6.5879545 0.0 -32.5404 6.96182 -20.2884 355.646 -2902.69 355.932 -2904.81 0.0 355.932 -2904.81 70.8499 -32.5404 -2510.5684 8.22256 8.22256
0 4 -6.8032455 0.0 -31.6343 7.11115 -19.5125 355.646 -2902.69 355.795 -2908.51 0.0 355.795 -2908.51 73.985 -31.6343 -2510.3645 8.68002 8.68002
0 5 -5.913542 0.0 -23.1335 6.71244 -18.6095 355.646 -2902.69 355.429 -2906.26 0.0 355.429 -2906.26 70.1128 -23.1335 -2503.8518 8.68095 8.68095
1 0 -6.469402 0.0 -28.155 6.6145 -17.4839 355.646 -2902.69 355.166 -2906.2 0.0 355.166 -2906.2 63.4499 -28.155 -2515.739 3.82075 3.82075
1 1 -6.4852643 0.0 -28.4801 6.61453 -17.6344 355.646 -2902.69 355.155 -2906.09 0.0 355.155 -2906.09 63.741 -28.4801 -2515.674 3.86982 3.86982
2 0 -6.666751 0.0 -34.8415 6.83753 -16.2697 355.646 -2902.69 355.483 -2898.02 0.0 355.483 -2898.02 61.6614 -34.8415 -2515.7173 -0.168407 -0.168407
2 1 -6.3386664 0.0 -30.725 6.83457 -15.1976 355.646 -2902.69 355.454 -2897.91 0.0 355.454 -2897.91 59.4424 -30.725 -2513.7385 1.10494 1.10494
2 2 -6.4976735 0.0 -33.1957 6.83798 -16.1032 355.646 -2902.69 355.545 -2897.73 0.0 355.545 -2897.73 61.8586 -33.1957 -2513.5222 2.30413 2.30413
2 3 -6.90132 0.0 -41.0726 7.02245 -22.0214 355.646 -2902.69 355.459 -2897.65 0.0 355.459 -2897.65 77.4131 -41.0726 -2505.8503 9.29913 9.29913
2 4 -6.348218 0.0 -30.7627 6.97194 -19.5658 355.646 -2902.69 355.4 -2902.08 0.0 355.4 -2902.08 72.1211 -30.7627 -2505.3218 8.78986 8.78986
2 5 -6.2335544 0.0 -27.7955 6.53412 -16.0537 355.646 -2902.69 355.298 -2901.8 0.0 355.298 -2901.8 74.3408 -27.7955 -2499.9565 12.9679 12.9679
2 6 -5.7131505 0.0 -26.2251 6.78378 -21.3655 355.646 -2902.69 355.408 -2900.82 0.0 355.408 -2900.82 72.3917 -26.2251 -2499.2456 8.9146 8.9146
2 7 -6.23959 0.0 -29.2454 6.9367 -19.4253 355.646 -2902.69 355.436 -2902.62 0.0 355.436 -2902.62 88.5704 -29.2454 -2487.8591 27.1908 27.1908
3 0 -6.2182007 0.0 -23.6632 6.37416 -14.5313 355.646 -2902.69 355.103 -2906.36 0.0 355.103 -2906.36 59.2965 -23.6632 -2515.6238 4.07915 4.07915
3 1 -6.2182007 0.0 -23.6632 6.37416 -14.5313 355.646 -2902.69 355.103 -2906.36 0.0 355.103 -2906.36 59.2965 -23.6632 -2515.6238 4.07915 4.07915
3 2 -6.2182007 0.0 -23.6632 6.37416 -14.5313 355.646 -2902.69 355.103 -2906.36 0.0 355.103 -2906.36 59.2965 -23.6632 -2515.6238 4.07915 4.07915
3 3 -6.2722735 0.0 -25.2194 6.69694 -15.0081 355.646 -2902.69 355.455 -2905.36 0.0 355.455 -2905.36 60.583 -25.2194 -2514.5415 1.95528 1.95528
3 4 -6.24993 0.0 -24.9154 6.68872 -14.9673 355.646 -2902.69 355.457 -2905.44 0.0 355.457 -2905.44 60.4944 -24.9154 -2514.4038 1.89457 1.89457
3 5 -5.953445 0.0 -20.1753 6.39477 -14.8039 355.646 -2902.69 355.209 -2907.83 0.0 355.209 -2907.83 58.9764 -20.1753 -2513.82 6.07512 6.07512
3 6 -5.953445 0.0 -20.1753 6.39477 -14.8039 355.646 -2902.69 355.209 -2907.83 0.0 355.209 -2907.83 58.9764 -20.1753 -2513.82 6.07512 6.07512
3 7 -6.115522 0.0 -22.4604 6.38337 -15.9693 355.646 -2902.69 355.106 -2907.97 0.0 355.106 -2907.97 61.6848 -22.4604 -2513.6396 5.87414 5.87414
3 8 -6.115522 0.0 -22.4604 6.38337 -15.9693 355.646 -2902.69 355.106 -2907.97 0.0 355.106 -2907.97 61.6848 -22.4604 -2513.6396 5.87414 5.87414
3 9 -6.115522 0.0 -22.4604 6.38337 -15.9693 355.646 -2902.69 355.106 -2907.97 0.0 355.106 -2907.97 61.6848 -22.4604 -2513.6396 5.87414 5.87414
3 10 -5.979037 0.0 -22.5133 6.56927 -17.1318 355.646 -2902.69 355.311 -2906.85 0.0 355.311 -2906.85 66.9411 -22.5133 -2507.1113 8.67251 8.67251
3 11 -5.953003 0.0 -22.1325 6.84438 -17.7086 355.646 -2902.69 355.696 -2907.76 0.0 355.696 -2907.76 72.1988 -22.1325 -2501.9976 17.3733 17.3733
3 12 -5.655249 0.0 -18.6757 6.57822 -16.2134 355.646 -2902.69 355.331 -2906.59 0.0 355.331 -2906.59 68.3262 -18.6757 -2501.6086 14.1215 14.1215
3 13 -6.0361195 0.0 -25.2303 6.53792 -19.9469 355.646 -2902.69 355.048 -2906.04 0.0 355.048 -2906.04 75.7082 -25.2303 -2500.5142 14.4273 14.4273
4 0 -6.221276 0.0 -26.9604 6.48553 -15.9089 355.646 -2902.69 355.123 -2902.55 0.0 355.123 -2902.55 58.9796 -26.9604 -2515.4077 1.30623 1.30623
4 1 -6.221276 0.0 -26.9604 6.48553 -15.9089 355.646 -2902.69 355.123 -2902.55 0.0 355.123 -2902.55 58.9796 -26.9604 -2515.4077 1.30623 1.30623
4 2 -6.2254 0.0 -26.9647 6.48758 -15.8823 355.646 -2902.69 355.09 -2902.53 0.0 355.09 -2902.53 59.1127 -26.9647 -2515.292 1.44792 1.44792
4 3 -6.2254 0.0 -26.9647 6.48758 -15.8823 355.646 -2902.69 355.09 -2902.53 0.0 355.09 -2902.53 59.1127 -26.9647 -2515.292 1.44792 1.44792
4 4 -6.033135 0.0 -23.5081 6.52529 -16.2905 355.646 -2902.69 354.992 -2904.93 0.0 354.992 -2904.93 60.4138 -23.5081 -2513.0322 6.32606 6.32606
4 5 -6.033135 0.0 -23.5081 6.52529 -16.2905 355.646 -2902.69 354.992 -2904.93 0.0 354.992 -2904.93 60.4138 -23.5081 -2513.0322 6.32606 6.32606
4 6 -6.033135 0.0 -23.5081 6.52529 -16.2905 355.646 -2902.69 354.992 -2904.93 0.0 354.992 -2904.93 60.4138 -23.5081 -2513.0322 6.32606 6.32606
4 7 -6.033135 0.0 -23.5081 6.52529 -16.2905 355.646 -2902.69 354.992 -2904.93 0.0 354.992 -2904.93 60.4138 -23.5081 -2513.0322 6.32606 6.32606
5 0 -6.19187 0.0 -24.219 6.65709 -16.3952 355.646 -2902.69 354.723 -2905.91 0.0 354.723 -2905.91 60.6097 -24.219 -2514.7964 4.14134 4.14134
5 1 -6.19187 0.0 -24.219 6.65709 -16.3952 355.646 -2902.69 354.723 -2905.91 0.0 354.723 -2905.91 60.6097 -24.219 -2514.7964 4.14134 4.14134
5 2 -6.1917696 0.0 -24.2226 6.65685 -16.4097 355.646 -2902.69 354.731 -2905.93 0.0 354.731 -2905.93 60.6267 -24.2226 -2514.795 4.14271 4.14271
5 3 -6.1917696 0.0 -24.2226 6.65685 -16.4097 355.646 -2902.69 354.731 -2905.93 0.0 354.731 -2905.93 60.6267 -24.2226 -2514.795 4.14271 4.14271
5 4 -6.1917696 0.0 -24.2226 6.65685 -16.4097 355.646 -2902.69 354.731 -2905.93 0.0 354.731 -2905.93 60.6267 -24.2226 -2514.795 4.14271 4.14271
5 5 -6.186695 0.0 -24.1391 6.65694 -16.4168 355.646 -2902.69 354.729 -2905.98 0.0 354.729 -2905.98 60.6086 -24.1391 -2514.7815 4.13862 4.13862
5 6 -6.186695 0.0 -24.1391 6.65694 -16.4168 355.646 -2902.69 354.729 -2905.98 0.0 354.729 -2905.98 60.6086 -24.1391 -2514.7815 4.13862 4.13862
5 7 -6.186695 0.0 -24.1391 6.65694 -16.4168 355.646 -2902.69 354.729 -2905.98 0.0 354.729 -2905.98 60.6086 -24.1391 -2514.7815 4.13862 4.13862
6 0 -6.49816 0.0 -31.3466 6.48594 -17.7258 355.646 -2902.69 355.032 -2901.97 0.0 355.032 -2901.97 63.5146 -31.3466 -2514.77 0.171982 0.171982
6 1 -6.5230675 0.0 -31.7404 6.48161 -17.657 355.646 -2902.69 355.028 -2901.7 0.0 355.028 -2901.7 63.6614 -31.7404 -2514.751 -0.01806096 -0.01806096
6 2 -6.5230675 0.0 -31.7404 6.48161 -17.657 355.646 -2902.69 355.028 -2901.7 0.0 355.028 -2901.7 63.6614 -31.7404 -2514.751 -0.01806096 -0.01806096
6 3 -6.3470507 0.0 -29.4639 6.49187 -17.6407 355.646 -2902.69 355.157 -2902.51 0.0 355.157 -2902.51 65.2773 -29.4639 -2511.5396 5.19009 5.19009
6 4 -5.598879 0.0 -20.1394 6.50229 -17.6645 355.646 -2902.69 355.179 -2904.74 0.0 355.179 -2904.74 65.8705 -20.1394 -2503.8298 9.63813 9.63813
6 5 -5.4869604 0.0 -19.0902 6.53289 -17.4949 355.646 -2902.69 355.188 -2904.33 0.0 355.188 -2904.33 64.8941 -19.0902 -2503.3381 9.32529 9.32529
6 6 -5.4869604 0.0 -19.0902 6.53289 -17.4949 355.646 -2902.69 355.188 -2904.33 0.0 355.188 -2904.33 64.8941 -19.0902 -2503.3381 9.32529 9.32529
6 7 -5.416583 0.0 -18.0892 6.50202 -17.1928 355.646 -2902.69 355.186 -2904.47 0.0 355.186 -2904.47 67.0281 -18.0892 -2500.345 11.2012 11.2012
7 0 -6.5642743 0.0 -33.8267 6.64149 -16.7962 355.646 -2902.69 355.597 -2898.92 0.0 355.597 -2898.92 62.6038 -33.8267 -2514.546 1.87273 1.87273
7 1 -6.5642743 0.0 -33.8267 6.64149 -16.7962 355.646 -2902.69 355.597 -2898.92 0.0 355.597 -2898.92 62.6038 -33.8267 -2514.546 1.87273 1.87273
7 2 -6.5642743 0.0 -33.8267 6.64149 -16.7962 355.646 -2902.69 355.597 -2898.92 0.0 355.597 -2898.92 62.6038 -33.8267 -2514.546 1.87273 1.87273
7 3 -6.5642743 0.0 -33.8267 6.64149 -16.7962 355.646 -2902.69 355.597 -2898.92 0.0 355.597 -2898.92 62.6038 -33.8267 -2514.546 1.87273 1.87273
7 4 -6.5587697 0.0 -33.7693 6.64104 -16.8277 355.646 -2902.69 355.564 -2898.9 0.0 355.564 -2898.9 62.5881 -33.7693 -2514.517 1.8361 1.8361
7 5 -6.6299458 0.0 -34.7157 6.6344 -17.064 355.646 -2902.69 355.508 -2898.76 0.0 355.508 -2898.76 63.4699 -34.7157 -2514.4978 2.00727 2.00727
7 6 -6.6299458 0.0 -34.7157 6.6344 -17.064 355.646 -2902.69 355.508 -2898.76 0.0 355.508 -2898.76 63.4699 -34.7157 -2514.4978 2.00727 2.00727
7 7 -6.6299458 0.0 -34.7157 6.6344 -17.064 355.646 -2902.69 355.508 -2898.76 0.0 355.508 -2898.76 63.4699 -34.7157 -2514.4978 2.00727 2.00727
8 0 -6.0365977 0.0 -20.2797 6.64373 -15.3577 355.646 -2902.69 355.703 -2909.96 0.0 355.703 -2909.96 60.0215 -20.2797 -2514.5151 2.35766 2.35766
8 1 -6.0365977 0.0 -20.2797 6.64373 -15.3577 355.646 -2902.69 355.703 -2909.96 0.0 355.703 -2909.96 60.0215 -20.2797 -2514.5151 2.35766 2.35766
8 2 -6.0365977 0.0 -20.2797 6.64373 -15.3577 355.646 -2902.69 355.703 -2909.96 0.0 355.703 -2909.96 60.0215 -20.2797 -2514.5151 2.35766 2.35766
8 3 -6.0365977 0.0 -20.2797 6.64373 -15.3577 355.646 -2902.69 355.703 -2909.96 0.0 355.703 -2909.96 60.0215 -20.2797 -2514.5151 2.35766 2.35766
8 4 -6.020441 0.0 -19.9958 6.63989 -15.2785 355.646 -2902.69 355.715 -2910.08 0.0 355.715 -2910.08 59.8607 -19.9958 -2514.5 2.37049 2.37049
8 5 -6.020441 0.0 -19.9958 6.63989 -15.2785 355.646 -2902.69 355.715 -2910.08 0.0 355.715 -2910.08 59.8607 -19.9958 -2514.5 2.37049 2.37049
8 6 -6.037869 0.0 -20.4293 6.65829 -14.6226 355.646 -2902.69 355.773 -2909.1 0.0 355.773 -2909.1 59.3264 -20.4293 -2514.43 2.33422 2.33422
8 7 -6.037869 0.0 -20.4293 6.65829 -14.6226 355.646 -2902.69 355.773 -2909.1 0.0 355.773 -2909.1 59.3264 -20.4293 -2514.43 2.33422 2.33422
9 0 -6.714167 0.0 -40.0679 6.6325 -19.6747 355.646 -2902.69 355.549 -2894.54 0.0 355.549 -2894.54 64.7401 -40.0679 -2514.3188 0.261955 0.261955
9 1 -6.6860085 0.0 -39.8386 6.63544 -19.701 355.646 -2902.69 355.545 -2894.45 0.0 355.545 -2894.45 64.7256 -39.8386 -2514.018 0.341985 0.341985
9 2 -6.0529547 0.0 -32.5498 6.83529 -22.0867 355.646 -2902.69 355.649 -2897.61 0.0 355.649 -2897.61 69.1232 -32.5498 -2505.3877 6.34582 6.34582
9 3 -6.1226616 0.0 -33.065 6.69129 -20.855 355.646 -2902.69 355.446 -2896.63 0.0 355.446 -2896.63 71.4025 -33.065 -2502.8464 8.38634 8.38634
9 4 -5.8586287 0.0 -27.7415 6.78857 -16.5734 355.646 -2902.69 355.852 -2896.74 0.0 355.852 -2896.74 66.7145 -27.7415 -2501.915 8.84581 8.84581
9 5 -5.2558994 0.0 -20.0393 6.83344 -20.7974 355.646 -2902.69 355.482 -2902.38 0.0 355.482 -2902.38 70.1836 -20.0393 -2496.7537 11.2779 11.2779
10 0 -5.9813695 0.0 -20.888 6.44101 -15.1075 355.646 -2902.69 356.162 -2908.89 0.0 356.162 -2908.89 59.3082 -20.888 -2514.3076 6.83654 6.83654
10 1 -6.319073 0.0 -28.3472 6.98692 -18.4382 355.646 -2902.69 355.939 -2905.02 0.0 355.939 -2905.02 70.352 -28.3472 -2507.0762 11.74 11.74
10 2 -5.718209 0.0 -19.7908 6.45898 -17.2765 355.646 -2902.69 355.711 -2907.73 0.0 355.711 -2907.73 65.675 -19.7908 -2506.1348 11.8293 11.8293
10 3 -6.268531 0.0 -27.9267 6.96433 -18.9194 355.646 -2902.69 355.997 -2905.45 0.0 355.997 -2905.45 71.2783 -27.9267 -2506.1013 12.5368 12.5368
10 4 -5.979742 0.0 -22.5077 6.85034 -16.9949 355.646 -2902.69 355.868 -2907.16 0.0 355.868 -2907.16 69.7523 -22.5077 -2504.0474 13.9622 13.9622
10 5 -5.618089 0.0 -16.5932 6.77272 -19.3436 355.646 -2902.69 355.977 -2913.03 0.0 355.977 -2913.03 70.2237 -16.5932 -2503.4224 14.0741 14.0741
10 6 -5.5945745 0.0 -18.1141 6.46324 -18.057 355.646 -2902.69 356.018 -2909.55 0.0 356.018 -2909.55 69.4527 -18.1141 -2502.1934 12.8523 12.8523
10 7 -5.590861 0.0 -18.0875 6.46292 -18.073 355.646 -2902.69 356.02 -2909.55 0.0 356.02 -2909.55 69.4756 -18.0875 -2502.1418 12.8521 12.8521
11 0 -5.9414554 0.0 -20.2148 6.67799 -15.0596 355.646 -2902.69 354.969 -2907.02 0.0 354.969 -2907.02 58.2295 -20.2148 -2514.0364 4.57486 4.57486
11 1 -6.0209312 0.0 -21.7493 6.82067 -14.9452 355.646 -2902.69 354.819 -2905.38 0.0 354.819 -2905.38 60.968 -21.7493 -2511.342 6.31348 6.31348
11 2 -6.0141225 0.0 -21.654 6.82298 -14.9766 355.646 -2902.69 354.823 -2905.45 0.0 354.823 -2905.45 60.9469 -21.654 -2511.334 6.31042 6.31042
11 3 -5.765664 0.0 -19.3182 6.69622 -18.7631 355.646 -2902.69 354.711 -2908.81 0.0 354.711 -2908.81 66.1616 -19.3182 -2507.2556 9.21488 9.21488
12 0 -6.3118906 0.0 -28.3899 6.79083 -18.8939 355.646 -2902.69 355.625 -2905.11 0.0 355.625 -2905.11 63.995 -28.3899 -2513.8801 2.48356 2.48356
12 1 -6.3108935 0.0 -28.3737 6.79055 -18.8952 355.646 -2902.69 355.631 -2905.13 0.0 355.631 -2905.13 63.9952 -28.3737 -2513.8772 2.48395 2.48395
12 2 -5.9127154 0.0 -22.8372 6.54691 -15.7654 355.646 -2902.69 355.289 -2903.9 0.0 355.289 -2903.9 61.4682 -22.8372 -2509.9797 2.94213 2.94213
12 3 -6.036794 0.0 -24.0772 6.58521 -16.0285 355.646 -2902.69 355.396 -2904.38 0.0 355.396 -2904.38 67.1392 -24.0772 -2505.9219 8.48353 8.48353
12 4 -5.7953777 0.0 -22.2259 6.63852 -16.8527 355.646 -2902.69 355.287 -2903.87 0.0 355.287 -2903.87 64.9204 -22.2259 -2505.8887 7.60067 7.60067
12 5 -5.7453575 0.0 -21.5631 6.96169 -16.4427 355.646 -2902.69 355.476 -2903.46 0.0 355.476 -2903.46 66.7214 -21.5631 -2502.8257 10.0314 10.0314
12 6 -5.5799403 0.0 -19.3637 6.85792 -20.9255 355.646 -2902.69 355.89 -2909.44 0.0 355.89 -2909.44 81.8833 -19.3637 -2491.0303 24.2049 24.2049
13 0 -6.2632732 0.0 -25.0352 6.83393 -16.7619 355.646 -2902.69 355.675 -2907.38 0.0 355.675 -2907.38 62.9084 -25.0352 -2513.8315 5.31183 5.31183
13 1 -5.7048373 0.0 -19.4266 6.73156 -18.057 355.646 -2902.69 355.644 -2908.33 0.0 355.644 -2908.33 63.1482 -19.4266 -2508.9644 6.69081 6.69081
13 2 -5.781296 0.0 -20.2632 6.60233 -16.0205 355.646 -2902.69 355.502 -2906.23 0.0 355.502 -2906.23 64.5801 -20.2632 -2506.4111 11.4582 11.4582
13 3 -6.139141 0.0 -23.0015 6.79013 -19.449 355.646 -2902.69 355.455 -2910.91 0.0 355.455 -2910.91 73.3603 -23.0015 -2505.096 12.7357 12.7357
13 4 -6.0693035 0.0 -25.1633 7.06643 -16.7812 355.646 -2902.69 355.654 -2903.64 0.0 355.654 -2903.64 69.607 -25.1633 -2503.5422 13.5812 13.5812
13 5 -6.0755115 0.0 -25.2744 7.06648 -16.6955 355.646 -2902.69 355.658 -2903.49 0.0 355.658 -2903.49 69.5815 -25.2744 -2503.525 13.5549 13.5549
14 0 -6.4841638 0.0 -30.3418 6.76825 -18.7794 355.646 -2902.69 355.445 -2904.55 0.0 355.445 -2904.55 65.7051 -30.3418 -2513.7417 3.13277 3.13277
14 1 -6.483777 0.0 -30.3584 6.76944 -18.7863 355.646 -2902.69 355.443 -2904.52 0.0 355.443 -2904.52 65.818 -30.3584 -2513.6172 3.16274 3.16274
14 2 -6.4861064 0.0 -30.3928 6.76901 -18.7938 355.646 -2902.69 355.441 -2904.51 0.0 355.441 -2904.51 65.8537 -30.3928 -2513.6082 3.16994 3.16994
14 3 -6.5556374 0.0 -29.4842 6.71837 -20.3557 355.646 -2902.69 355.434 -2908.68 0.0 355.434 -2908.68 72.5696 -29.4842 -2510.1604 7.21179 7.21179
14 4 -6.3059707 0.0 -26.0103 6.70753 -17.5792 355.646 -2902.69 355.479 -2907.28 0.0 355.479 -2907.28 68.5969 -26.0103 -2509.2144 7.25142 7.25142
14 5 -6.2828746 0.0 -25.9502 6.71935 -19.663 355.646 -2902.69 355.433 -2908.99 0.0 355.433 -2908.99 71.8827 -25.9502 -2507.6243 8.20952 8.20952
14 6 -6.065927 0.0 -25.3152 6.89394 -20.5554 355.646 -2902.69 355.55 -2907.23 0.0 355.55 -2907.23 75.988 -25.3152 -2501.007 12.2672 12.2672
14 7 -5.77582 0.0 -21.7981 6.89747 -19.5831 355.646 -2902.69 355.538 -2906.93 0.0 355.538 -2906.93 74.1636 -21.7981 -2499.0264 12.9132 12.9132
15 0 -6.697593 0.0 -37.6127 6.74664 -18.1705 355.646 -2902.69 356.627 -2898.05 0.0 356.627 -2898.05 65.6561 -37.6127 -2513.3796 1.16136 1.16136
15 1 -6.706673 0.0 -38.1549 6.56655 -18.8423 355.646 -2902.69 356.245 -2897.72 0.0 356.245 -2897.72 70.9727 -38.1549 -2508.6572 5.58296 5.58296
15 2 -6.298707 0.0 -31.2213 7.01363 -17.1857 355.646 -2902.69 356.773 -2900.24 0.0 356.773 -2900.24 66.0826 -31.2213 -2508.6057 5.61536 5.61536
15 3 -6.0434523 0.0 -28.6895 6.6169 -17.3965 355.646 -2902.69 356.594 -2900.53 0.0 356.594 -2900.53 64.996 -28.6895 -2507.6296 4.13433 4.13433
15 4 -5.8275313 0.0 -27.603 6.59961 -16.9629 355.646 -2902.69 356.617 -2898.31 0.0 356.617 -2898.31 64.2148 -27.603 -2505.0813 6.8194 6.8194
15 5 -5.711323 0.0 -25.1093 6.96566 -20.051 355.646 -2902.69 356.547 -2902.68 0.0 356.547 -2902.68 86.1196 -25.1093 -2485.1226 26.6489 26.6489
15 6 -5.7936196 0.0 -27.256 6.97924 -19.7049 355.646 -2902.69 356.554 -2900.35 0.0 356.554 -2900.35 86.7095 -27.256 -2484.3425 27.2389 27.2389
16 0 -6.2238045 0.0 -26.387 6.43829 -19.0626 355.646 -2902.69 355.146 -2906.74 0.0 355.146 -2906.74 65.4115 -26.387 -2512.5696 4.01064 4.01064
16 1 -6.172379 0.0 -26.3988 6.53438 -16.7964 355.646 -2902.69 355.575 -2904.13 0.0 355.575 -2904.13 66.9515 -26.3988 -2508.0022 9.992 9.992
16 2 -5.939186 0.0 -21.9569 6.582 -14.8913 355.646 -2902.69 355.797 -2905.55 0.0 355.797 -2905.55 67.6466 -21.9569 -2504.0635 13.9759 13.9759
16 3 -6.0481925 0.0 -22.8755 6.54245 -16.6347 355.646 -2902.69 355.308 -2906.96 0.0 355.308 -2906.96 71.2009 -22.8755 -2503.3264 14.1788 14.1788
16 4 -5.683833 0.0 -19.7438 6.74985 -18.8039 355.646 -2902.69 355.77 -2908.41 0.0 355.77 -2908.41 69.442 -19.7438 -2502.9417 15.0867 15.0867
16 5 -5.488001 0.0 -16.7879 6.84315 -17.8722 355.646 -2902.69 356.182 -2909.34 0.0 356.182 -2909.34 67.7445 -16.7879 -2502.2017 16.612 16.612
16 6 -6.04075 0.0 -23.2181 6.70662 -14.5331 355.646 -2902.69 355.694 -2904.55 0.0 355.694 -2904.55 71.2954 -23.2181 -2500.7786 16.6949 16.6949
16 7 -5.615108 0.0 -20.0053 6.52173 -19.0278 355.646 -2902.69 355.667 -2907.3 0.0 355.667 -2907.3 72.3787 -20.0053 -2499.2598 15.1173 15.1173
17 0 -6.350327 0.0 -28.1226 6.89748 -18.009 355.646 -2902.69 355.637 -2905.12 0.0 355.637 -2905.12 65.256 -28.1226 -2512.3499 5.75588 5.75588
17 1 -6.350327 0.0 -28.1226 6.89748 -18.009 355.646 -2902.69 355.637 -2905.12 0.0 355.637 -2905.12 65.256 -28.1226 -2512.3499 5.75588 5.75588
17 2 -6.350327 0.0 -28.1226 6.89748 -18.009 355.646 -2902.69 355.637 -2905.12 0.0 355.637 -2905.12 65.256 -28.1226 -2512.3499 5.75588 5.75588
17 3 -6.3513923 0.0 -28.1399 6.89834 -18.0081 355.646 -2902.69 355.638 -2905.11 0.0 355.638 -2905.11 65.2649 -28.1399 -2512.3472 5.75632 5.75632
17 4 -6.3513923 0.0 -28.1399 6.89834 -18.0081 355.646 -2902.69 355.638 -2905.11 0.0 355.638 -2905.11 65.2649 -28.1399 -2512.3472 5.75632 5.75632
17 5 -6.3513923 0.0 -28.1399 6.89834 -18.0081 355.646 -2902.69 355.638 -2905.11 0.0 355.638 -2905.11 65.2649 -28.1399 -2512.3472 5.75632 5.75632
17 6 -6.348815 0.0 -28.1134 6.89444 -18.023 355.646 -2902.69 355.638 -2905.13 0.0 355.638 -2905.13 65.3024 -28.1134 -2512.303 5.76132 5.76132
17 7 -6.348815 0.0 -28.1134 6.89444 -18.023 355.646 -2902.69 355.638 -2905.13 0.0 355.638 -2905.13 65.3024 -28.1134 -2512.303 5.76132 5.76132
18 0 -5.691665 0.0 -15.1354 6.61206 -15.2794 355.646 -2902.69 353.881 -2909.43 0.0 353.881 -2909.43 58.6139 -15.1354 -2512.0703 8.02109 8.02109
18 1 -5.649736 0.0 -16.7005 6.59843 -15.5966 355.646 -2902.69 354.008 -2906.86 0.0 354.008 -2906.86 58.7107 -16.7005 -2510.8418 8.01411 8.01411
18 2 -5.636461 0.0 -16.7221 6.59734 -15.6118 355.646 -2902.69 354.023 -2906.65 0.0 354.023 -2906.65 58.6771 -16.7221 -2510.6719 8.06834 8.06834
18 3 -5.782646 0.0 -20.0745 6.67432 -17.0159 355.646 -2902.69 354.119 -2905.29 0.0 354.119 -2905.29 62.5266 -20.0745 -2508.719 9.52011 9.52011
18 4 -5.782646 0.0 -20.0745 6.67432 -17.0159 355.646 -2902.69 354.119 -2905.29 0.0 354.119 -2905.29 62.5266 -20.0745 -2508.719 9.52011 9.52011
18 5 -5.758885 0.0 -19.7417 6.67398 -16.951 355.646 -2902.69 354.079 -2905.29 0.0 354.079 -2905.29 62.3451 -19.7417 -2508.6074 9.61897 9.61897
18 6 -5.563019 0.0 -17.3275 6.69516 -17.0018 355.646 -2902.69 353.84 -2905.47 0.0 353.84 -2905.47 62.3242 -17.3275 -2506.6333 11.1325 11.1325
18 7 -5.563019 0.0 -17.3275 6.69516 -17.0018 355.646 -2902.69 353.84 -2905.47 0.0 353.84 -2905.47 62.3242 -17.3275 -2506.6333 11.1325 11.1325
19 0 -5.914072 0.0 -19.7805 6.56469 -16.4469 355.646 -2902.69 355.353 -2909.4 0.0 355.353 -2909.4 61.9651 -19.7805 -2511.8623 5.39438 5.39438
19 1 -5.914072 0.0 -19.7805 6.56469 -16.4469 355.646 -2902.69 355.353 -2909.4 0.0 355.353 -2909.4 61.9651 -19.7805 -2511.8623 5.39438 5.39438
19 2 -5.914072 0.0 -19.7805 6.56469 -16.4469 355.646 -2902.69 355.353 -2909.4 0.0 355.353 -2909.4 61.9651 -19.7805 -2511.8623 5.39438 5.39438
19 3 -5.914072 0.0 -19.7805 6.56469 -16.4469 355.646 -2902.69 355.353 -2909.4 0.0 355.353 -2909.4 61.9651 -19.7805 -2511.8623 5.39438 5.39438
19 4 -5.914072 0.0 -19.7805 6.56469 -16.4469 355.646 -2902.69 355.353 -2909.4 0.0 355.353 -2909.4 61.9651 -19.7805 -2511.8623 5.39438 5.39438
19 5 -5.80029 0.0 -19.8199 6.54094 -16.5306 355.646 -2902.69 355.107 -2907.22 0.0 355.107 -2907.22 61.9626 -19.8199 -2509.9702 3.39338 3.39338
19 6 -5.80029 0.0 -19.8199 6.54094 -16.5306 355.646 -2902.69 355.107 -2907.22 0.0 355.107 -2907.22 61.9626 -19.8199 -2509.9702 3.39338 3.39338
19 7 -5.793392 0.0 -19.7426 6.5389 -16.5184 355.646 -2902.69 355.102 -2907.21 0.0 355.102 -2907.21 61.8976 -19.7426 -2509.953 3.37217 3.37217
20 0 -5.7321844 0.0 -18.8364 6.54152 -14.2846 355.646 -2902.69 356.614 -2907.71 0.0 356.614 -2907.71 58.2187 -18.8364 -2511.7136 7.05928 7.05928
20 1 -5.6953793 0.0 -18.4716 6.54064 -14.3022 355.646 -2902.69 356.626 -2907.71 0.0 356.626 -2907.71 58.0181 -18.4716 -2511.5376 6.88716 6.88716
20 2 -5.7002773 0.0 -18.5586 6.5412 -14.289 355.646 -2902.69 356.625 -2907.64 0.0 356.625 -2907.64 58.0465 -18.5586 -2511.527 6.90429 6.90429
20 3 -5.2772903 0.0 -13.1287 6.60932 -20.4993 355.646 -2902.69 356.446 -2914.95 0.0 356.446 -2914.95 68.0728 -13.1287 -2503.5598 12.8816 12.8816
20 4 -5.2640343 0.0 -12.7683 6.60809 -20.4087 355.646 -2902.69 356.406 -2915.14 0.0 356.406 -2915.14 68.1187 -12.7683 -2503.3835 12.926 12.926
20 5 -5.7126093 0.0 -24.0534 6.88638 -20.8101 355.646 -2902.69 356.738 -2905.51 0.0 356.738 -2905.51 84.1746 -24.0534 -2488.651 27.2562 27.2562
20 6 -5.691701 0.0 -24.3445 6.86962 -20.6922 355.646 -2902.69 356.585 -2904.39 0.0 356.585 -2904.39 83.9922 -24.3445 -2488.1572 27.0131 27.0131
20 7 -5.6577044 0.0 -21.9074 6.89065 -19.8537 355.646 -2902.69 356.714 -2906.93 0.0 356.714 -2906.93 84.0029 -21.9074 -2488.1206 27.971 27.971
21 0 -6.4846954 0.0 -35.1115 6.69122 -19.4048 355.646 -2902.69 354.953 -2897.17 0.0 354.953 -2897.17 66.0297 -35.1115 -2511.2988 3.81656 3.81656
21 1 -6.4846954 0.0 -35.1115 6.69122 -19.4048 355.646 -2902.69 354.953 -2897.17 0.0 354.953 -2897.17 66.0297 -35.1115 -2511.2988 3.81656 3.81656
21 2 -6.481845 0.0 -35.0611 6.69078 -19.4051 355.646 -2902.69 354.958 -2897.21 0.0 354.958 -2897.21 66.0298 -35.0611 -2511.2832 3.81049 3.81049
21 3 -6.4332886 0.0 -34.0379 6.68302 -19.417 355.646 -2902.69 355.002 -2898.09 0.0 355.002 -2898.09 65.9126 -34.0379 -2511.2134 3.8572 3.8572
21 4 -6.4332886 0.0 -34.0379 6.68302 -19.417 355.646 -2902.69 355.002 -2898.09 0.0 355.002 -2898.09 65.9126 -34.0379 -2511.2134 3.8572 3.8572
21 5 -6.313214 0.0 -32.2216 6.70624 -19.0376 355.646 -2902.69 355.17 -2898.78 0.0 355.17 -2898.78 65.1162 -32.2216 -2510.7156 4.40598 4.40598
21 6 -6.2775517 0.0 -31.5167 6.70681 -19.0545 355.646 -2902.69 355.207 -2899.36 0.0 355.207 -2899.36 65.185 -31.5167 -2510.4849 4.49164 4.49164
21 7 -6.2775517 0.0 -31.5167 6.70681 -19.0545 355.646 -2902.69 355.207 -2899.36 0.0 355.207 -2899.36 65.185 -31.5167 -2510.4849 4.49164 4.49164
22 0 -6.119563 0.0 -25.1591 6.57313 -18.8442 355.646 -2902.69 356.189 -2908.12 0.0 356.189 -2908.12 66.1607 -25.1591 -2510.9294 9.63746 9.63746
22 1 -6.1217785 0.0 -25.1983 6.57945 -18.8362 355.646 -2902.69 356.158 -2908.03 0.0 356.158 -2908.03 66.1749 -25.1983 -2510.8955 9.64162 9.64162
22 2 -5.8194757 0.0 -20.9562 6.51415 -17.0389 355.646 -2902.69 356.183 -2907.99 0.0 356.183 -2907.99 64.365 -20.9562 -2508.3982 10.2926 10.2926
22 3 -5.4785447 0.0 -15.5527 6.51389 -15.724 355.646 -2902.69 355.952 -2909.1 0.0 355.952 -2909.1 63.3708 -15.5527 -2505.33 13.0586 13.0586
22 4 -5.1008525 0.0 -11.6637 6.50231 -18.9759 355.646 -2902.69 355.965 -2912.23 0.0 355.965 -2912.23 68.9171 -11.6637 -2499.0115 14.508 14.508
22 5 -5.6775413 0.0 -19.7967 7.04051 -18.3091 355.646 -2902.69 356.138 -2907.85 0.0 356.138 -2907.85 76.7435 -19.7967 -2494.7654 23.1406 23.1406
23 0 -6.151028 0.0 -28.9439 6.69664 -16.5192 355.646 -2902.69 355.11 -2898.6 0.0 355.11 -2898.6 61.7507 -28.9439 -2510.683 2.54689 2.54689
23 1 -6.151028 0.0 -28.9439 6.69664 -16.5192 355.646 -2902.69 355.11 -2898.6 0.0 355.11 -2898.6 61.7507 -28.9439 -2510.683 2.54689 2.54689
23 2 -6.121392 0.0 -28.8456 6.71584 -16.6283 355.646 -2902.69 355.073 -2898.29 0.0 355.073 -2898.29 61.5429 -28.8456 -2510.5198 2.38401 2.38401
23 3 -6.121392 0.0 -28.8456 6.71584 -16.6283 355.646 -2902.69 355.073 -2898.29 0.0 355.073 -2898.29 61.5429 -28.8456 -2510.5198 2.38401 2.38401
23 4 -6.121392 0.0 -28.8456 6.71584 -16.6283 355.646 -2902.69 355.073 -2898.29 0.0 355.073 -2898.29 61.5429 -28.8456 -2510.5198 2.38401 2.38401
23 5 -6.121392 0.0 -28.8456 6.71584 -16.6283 355.646 -2902.69 355.073 -2898.29 0.0 355.073 -2898.29 61.5429 -28.8456 -2510.5198 2.38401 2.38401
23 6 -6.1114078 0.0 -28.6893 6.71568 -16.6317 355.646 -2902.69 355.078 -2898.38 0.0 355.078 -2898.38 61.4999 -28.6893 -2510.4912 2.41305 2.41305
23 7 -6.1114078 0.0 -28.6893 6.71568 -16.6317 355.646 -2902.69 355.078 -2898.38 0.0 355.078 -2898.38 61.4999 -28.6893 -2510.4912 2.41305 2.41305
24 0 -6.0481944 0.0 -24.0288 6.56661 -16.4368 355.646 -2902.69 355.035 -2904.52 0.0 355.035 -2904.52 62.8463 -24.0288 -2510.6677 4.23704 4.23704
24 1 -6.0483108 0.0 -24.0684 6.56431 -16.4648 355.646 -2902.69 355.04 -2904.5 0.0 355.04 -2904.5 62.8835 -24.0684 -2510.6448 4.24742 4.24742
25 0 -5.9218287 0.0 -23.649 6.47923 -16.4482 355.646 -2902.69 355.107 -2903.3 0.0 355.107 -2903.3 61.4098 -23.649 -2510.4324 3.15251 3.15251
25 1 -5.822371 0.0 -22.3058 6.46554 -16.2755 355.646 -2902.69 355.049 -2903.51 0.0 355.049 -2903.51 61.3523 -22.3058 -2509.4146 4.49119 4.49119
25 2 -5.538089 0.0 -19.6792 6.518 -15.3107 355.646 -2902.69 355.509 -2902.59 0.0 355.509 -2902.59 64.2697 -19.6792 -2502.4905 8.13443 8.13443
25 3 -6.3106604 0.0 -33.8767 6.66786 -20.8013 355.646 -2902.69 355.291 -2898.19 0.0 355.291 -2898.19 74.9608 -33.8767 -2501.815 10.6309 10.6309
25 4 -6.258308 0.0 -33.5719 6.62596 -21.1238 355.646 -2902.69 355.302 -2898.21 0.0 355.302 -2898.21 75.3821 -33.5719 -2501.0977 12.0443 12.0443
25 5 -5.6869917 0.0 -21.4146 6.62479 -16.1819 355.646 -2902.69 355.634 -2903.24 0.0 355.634 -2903.24 69.2206 -21.4146 -2499.8 15.2663 15.2663
25 6 -6.2784004 0.0 -34.2526 6.44877 -18.0534 355.646 -2902.69 355.684 -2895.28 0.0 355.684 -2895.28 74.4744 -34.2526 -2499.374 12.8451 12.8451
25 7 -5.4200883 0.0 -17.6353 6.71412 -18.2811 355.646 -2902.69 355.484 -2906.45 0.0 355.484 -2906.45 69.4749 -17.6353 -2499.1265 10.8096 10.8096
26 0 -6.156947 0.0 -24.4431 6.70144 -19.0764 355.646 -2902.69 355.03 -2908.08 0.0 355.03 -2908.08 67.0633 -24.4431 -2510.43 6.73686 6.73686
26 1 -6.140777 0.0 -24.906 6.67833 -19.1451 355.646 -2902.69 355.221 -2907.5 0.0 355.221 -2907.5 66.9123 -24.906 -2510.2727 5.86975 5.86975
27 0 -6.5900016 0.0 -36.5843 6.83548 -19.2001 355.646 -2902.69 356.081 -2897.93 0.0 356.081 -2897.93 68.2322 -36.5843 -2510.201 4.33184 4.33184
27 1 -6.5391088 0.0 -36.4191 6.81638 -19.8279 355.646 -2902.69 356.035 -2897.94 0.0 356.035 -2897.94 68.3043 -36.4191 -2510.0198 4.36597 4.36597
27 2 -6.021381 0.0 -32.2902 6.77361 -17.8846 355.646 -2902.69 356.342 -2894.46 0.0 356.342 -2894.46 67.7935 -32.2902 -2502.6145 9.08413 9.08413
27 3 -6.041443 0.0 -30.5135 6.93323 -17.1798 355.646 -2902.69 356.405 -2896.68 0.0 356.405 -2896.68 68.9142 -30.5135 -2501.8743 11.3819 11.3819
27 4 -5.98924 0.0 -32.6884 6.71682 -18.4956 355.646 -2902.69 356.285 -2893.93 0.0 356.285 -2893.93 68.9332 -32.6884 -2501.4001 9.51267 9.51267
27 5 -5.8753443 0.0 -30.5546 6.86992 -18.4354 355.646 -2902.69 356.33 -2895.14 0.0 356.33 -2895.14 69.9352 -30.5546 -2499.4292 11.3065 11.3065
27 6 -6.1378517 0.0 -36.7244 6.82961 -21.722 355.646 -2902.69 356.077 -2892.85 0.0 356.077 -2892.85 75.212 -36.7244 -2498.2856 12.542 12.542
28 0 -6.1413784 0.0 -24.1047 6.57218 -20.2047 355.646 -2902.69 354.618 -2909.04 0.0 354.618 -2909.04 68.4514 -24.1047 -2510.0754 4.97512 4.97512
28 1 -5.90696 0.0 -19.6227 6.46325 -16.9199 355.646 -2902.69 354.352 -2908.61 0.0 354.352 -2908.61 64.0478 -19.6227 -2509.833 5.61007 5.61007
28 2 -5.6591034 0.0 -18.6944 6.82534 -19.8674 355.646 -2902.69 354.499 -2908.61 0.0 354.499 -2908.61 72.9545 -18.6944 -2499.851 15.01 15.01
28 3 -5.648099 0.0 -21.5511 6.48074 -18.9741 355.646 -2902.69 354.6 -2903.81 0.0 354.6 -2903.81 71.0699 -21.5511 -2499.6912 13.0786 13.0786
28 4 -5.8659096 0.0 -23.552 6.81373 -21.3197 355.646 -2902.69 354.466 -2905.9 0.0 354.466 -2905.9 75.7354 -23.552 -2499.2505 14.9259 14.9259
28 5 -5.495359 0.0 -18.2797 6.36494 -19.6177 355.646 -2902.69 354.533 -2907.09 0.0 354.533 -2907.09 74.498 -18.2797 -2496.3389 15.8845 15.8845
28 6 -5.3840537 0.0 -16.4414 6.54823 -15.2471 355.646 -2902.69 354.249 -2903.02 0.0 354.249 -2903.02 70.044 -16.4414 -2495.1685 19.6154 19.6154
29 0 -6.6698823 0.0 -37.78 7.0306 -20.9687 355.646 -2902.69 355.865 -2898.52 0.0 355.865 -2898.52 70.4243 -37.78 -2510.0107 4.02078 4.02078
29 1 -6.489488 0.0 -35.6009 6.85103 -17.3084 355.646 -2902.69 355.588 -2895.13 0.0 355.588 -2895.13 65.4571 -35.6009 -2509.6855 3.96318 3.96318
29 2 -6.481354 0.0 -35.5695 6.83901 -17.3795 355.646 -2902.69 355.604 -2895.16 0.0 355.604 -2895.16 65.526 -35.5695 -2509.5994 3.94657 3.94657
29 3 -6.5840197 0.0 -37.63 6.88016 -18.4 355.646 -2902.69 355.611 -2894.62 0.0 355.611 -2894.62 67.9918 -37.63 -2508.6472 4.47962 4.47962
29 4 -6.39975 0.0 -31.2862 6.85103 -18.8615 355.646 -2902.69 355.804 -2902.22 0.0 355.804 -2902.22 69.1277 -31.2862 -2508.5745 5.65851 5.65851
29 5 -6.537694 0.0 -36.1424 7.03723 -18.9447 355.646 -2902.69 356.158 -2897.31 0.0 356.158 -2897.31 69.509 -36.1424 -2507.7854 6.03703 6.03703
29 6 -6.4619546 0.0 -35.0273 6.99955 -18.4683 355.646 -2902.69 355.674 -2896.63 0.0 355.674 -2896.63 69.4901 -35.0273 -2506.493 6.44112 6.44112
29 7 -6.669726 0.0 -40.2644 6.8567 -21.9003 355.646 -2902.69 355.679 -2895.59 0.0 355.679 -2895.59 77.0242 -40.2644 -2503.1514 9.5367 9.5367
30 0 -5.99986 0.0 -28.2697 6.46446 -16.6428 355.646 -2902.69 355.935 -2898.93 0.0 355.935 -2898.93 61.3721 -28.2697 -2509.8926 2.20502 2.20502
31 0 -6.3058677 0.0 -26.9706 6.82626 -16.9642 355.646 -2902.69 356.006 -2905.81 0.0 356.006 -2905.81 67.0023 -26.9706 -2509.7722 8.78866 8.78866
31 1 -6.2394695 0.0 -24.4003 6.79958 -16.3929 355.646 -2902.69 356.059 -2908.25 0.0 356.059 -2908.25 67.7153 -24.4003 -2508.876 9.76353 9.76353
32 0 -6.475306 0.0 -33.274 6.70872 -16.3237 355.646 -2902.69 353.977 -2895.24 0.0 353.977 -2895.24 65.2582 -33.274 -2509.2788 4.41784 4.41784
32 1 -6.6633325 0.0 -36.4079 6.65031 -16.867 355.646 -2902.69 354.06 -2894.23 0.0 354.06 -2894.23 67.3917 -36.4079 -2509.186 4.02784 4.02784
32 2 -6.3437533 0.0 -31.987 6.64336 -17.2798 355.646 -2902.69 354.173 -2896.44 0.0 354.173 -2896.44 66.0953 -31.987 -2508.1584 2.41039 2.41039
32 3 -5.795538 0.0 -25.0454 6.7088 -19.7124 355.646 -2902.69 354.093 -2900.42 0.0 354.093 -2900.42 72.8129 -25.0454 -2498.5593 10.9519 10.9519
32 4 -5.468387 0.0 -23.5317 6.67116 -19.6235 355.646 -2902.69 354.149 -2897.47 0.0 354.149 -2897.47 68.9828 -23.5317 -2497.8699 12.355 12.355
32 5 -5.10824 0.0 -20.1165 6.65986 -20.1345 355.646 -2902.69 354.186 -2897.45 0.0 354.186 -2897.45 71.5489 -20.1165 -2491.8315 15.7648 15.7648
32 6 -5.088081 0.0 -13.9554 6.76834 -19.6755 355.646 -2902.69 353.793 -2905.41 0.0 353.793 -2905.41 80.1142 -13.9554 -2485.4583 27.2299 27.2299
33 0 -5.9169617 0.0 -19.7504 6.49905 -15.3485 355.646 -2902.69 354.223 -2906.75 0.0 354.223 -2906.75 63.0538 -19.7504 -2509.2236 7.81006 7.81006
33 1 -5.91063 0.0 -19.7004 6.50052 -15.5999 355.646 -2902.69 354.234 -2906.99 0.0 354.234 -2906.99 63.3073 -19.7004 -2509.149 7.82855 7.82855
33 2 -5.9697022 0.0 -20.4899 6.49511 -14.8929 355.646 -2902.69 354.23 -2906.03 0.0 354.23 -2906.03 63.2644 -20.4899 -2509.0256 8.07269 8.07269
34 0 -6.2663875 0.0 -26.007 6.82569 -17.252 355.646 -2902.69 355.674 -2906.43 0.0 355.674 -2906.43 68.2124 -26.007 -2508.5505 12.2504 12.2504
35 0 -5.9354186 0.0 -21.2485 6.93201 -19.3571 355.646 -2902.69 355.52 -2910.08 0.0 355.52 -2910.08 67.9324 -21.2485 -2507.8762 10.2791 10.2791
35 1 -5.9184155 0.0 -21.1653 6.93953 -19.3753 355.646 -2902.69 355.554 -2909.99 0.0 355.554 -2909.99 67.7889 -21.1653 -2507.8125 10.1605 10.1605
36 0 -5.6618695 0.0 -19.5934 6.96128 -18.5592 355.646 -2902.69 356.668 -2909.1 0.0 356.668 -2909.1 64.4614 -19.5934 -2507.5642 5.30433 5.30433
37 0 -5.829831 0.0 -17.1937 6.83331 -16.6818 355.646 -2902.69 354.181 -2910.03 0.0 354.181 -2910.03 66.2211 -17.1937 -2506.8218 10.6187 10.6187
38 0 -5.755384 0.0 -23.7594 6.64768 -18.0882 355.646 -2902.69 356.039 -2903.23 0.0 356.039 -2903.23 64.9301 -23.7594 -2506.0203 6.91334 6.91334
39 0 -6.37343 0.0 -36.1153 6.65381 -20.2503 355.646 -2902.69 355.313 -2895.26 0.0 355.313 -2895.26 71.3615 -36.1153 -2504.701 9.04553 9.04553
40 0 -6.573897 0.0 -37.8889 6.64576 -17.2881 355.646 -2902.69 356.19 -2894.2 0.0 356.19 -2894.2 71.5996 -37.8889 -2504.2993 12.2204 12.2204
41 0 -6.3401847 0.0 -27.0666 6.70791 -15.8727 355.646 -2902.69 355.389 -2904.36 0.0 355.389 -2904.36 72.6632 -27.0666 -2503.3745 14.6484 14.6484
42 0 -5.410374 0.0 -20.605 6.83459 -16.6919 355.646 -2902.69 355.474 -2899.91 0.0 355.474 -2899.91 62.0001 -20.605 -2503.041 6.98027 6.98027
42 1 -5.4942627 0.0 -23.8151 6.6598 -17.702 355.646 -2902.69 355.326 -2897.37 0.0 355.326 -2897.37 66.5993 -23.8151 -2499.26 10.4391 10.4391
42 2 -5.7092338 0.0 -28.2156 6.66237 -19.6141 355.646 -2902.69 355.398 -2896.1 0.0 355.398 -2896.1 74.5146 -28.2156 -2494.403 14.0685 14.0685
43 0 -5.466866 0.0 -17.8875 6.64277 -18.0074 355.646 -2902.69 354.927 -2905.8 0.0 354.927 -2905.8 65.9265 -17.8875 -2502.834 9.77581 9.77581
44 0 -6.1800613 0.0 -27.5837 6.44257 -19.1252 355.646 -2902.69 354.537 -2903.29 0.0 354.537 -2903.29 73.6829 -27.5837 -2502.6538 11.1657 11.1657
45 0 -5.714765 0.0 -18.6216 6.54213 -13.1272 355.646 -2902.69 356.0 -2905.65 0.0 356.0 -2905.65 65.8026 -18.6216 -2502.469 16.289 16.289
46 0 -5.421527 0.0 -20.031 6.93438 -20.4056 355.646 -2902.69 355.41 -2904.44 0.0 355.41 -2904.44 67.1643 -20.031 -2501.8967 9.77988 9.77988
46 1 -5.892473 0.0 -25.9306 7.15571 -20.7961 355.646 -2902.69 355.679 -2903.48 0.0 355.679 -2903.48 74.5176 -25.9306 -2499.214 13.553 13.553
47 0 -5.479368 0.0 -17.6995 6.54434 -20.5561 355.646 -2902.69 356.023 -2910.69 0.0 356.023 -2910.69 70.6664 -17.6995 -2501.7002 16.8724 16.8724
47 1 -5.4035153 0.0 -17.8023 6.53874 -20.5192 355.646 -2902.69 355.885 -2909.05 0.0 355.885 -2909.05 70.9956 -17.8023 -2499.9717 16.757 16.757
48 0 -6.244602 0.0 -24.784 6.85394 -16.7401 355.646 -2902.69 355.416 -2907.01 0.0 355.416 -2907.01 75.1406 -24.784 -2501.2373 14.4778 14.4778
48 1 -6.0126896 0.0 -22.959 6.86359 -19.3162 355.646 -2902.69 355.44 -2908.64 0.0 355.44 -2908.64 79.0123 -22.959 -2497.1467 17.0333 17.0333
49 0 -5.616016 0.0 -21.8928 6.72225 -18.0795 355.646 -2902.69 356.444 -2904.34 0.0 356.444 -2904.34 69.7255 -21.8928 -2500.0632 13.4052 13.4052
50 0 -5.537658 0.0 -23.7908 6.4646 -14.4147 355.646 -2902.69 355.584 -2895.53 0.0 355.584 -2895.53 64.1331 -23.7908 -2499.6038 11.9475 11.9475
51 0 -5.7088857 0.0 -20.6573 6.70239 -15.9405 355.646 -2902.69 354.976 -2903.39 0.0 354.976 -2903.39 69.801 -20.6573 -2499.27 16.389 16.389
52 0 -6.129434 0.0 -31.7023 6.55844 -21.9809 355.646 -2902.69 355.486 -2900.24 0.0 355.486 -2900.24 77.2619 -31.7023 -2499.1943 13.8558 13.8558
52 1 -5.8180585 0.0 -27.5217 6.54428 -21.2174 355.646 -2902.69 355.523 -2900.93 0.0 355.523 -2900.93 75.047 -27.5217 -2497.8816 14.3583 14.3583
53 0 -6.3931046 0.0 -30.3096 6.98111 -22.8325 355.646 -2902.69 355.357 -2906.7 0.0 355.357 -2906.7 83.8115 -30.3096 -2497.841 16.9478 16.9478
54 0 -5.174754 0.0 -16.2969 6.89704 -16.5565 355.646 -2902.69 355.01 -2901.77 0.0 355.01 -2901.77 67.3588 -16.2969 -2495.698 16.7478 16.7478
54 1 -5.475628 0.0 -21.6846 7.04747 -20.6404 355.646 -2902.69 355.075 -2902.31 0.0 355.075 -2902.31 77.4356 -21.6846 -2491.4841 20.7217 20.7217
55 0 -5.1373696 0.0 -12.7747 6.86065 -15.913 355.646 -2902.69 355.2 -2906.31 0.0 355.2 -2906.31 72.1671 -12.7747 -2491.7178 19.4348 19.4348
