# Supplementary material for: Genetic Uniformity of a Specific Region in SARS-CoV-2 Genome and In-Silico Target-Oriented Repurposing of N-Acetyl-D-Glucosamine
Source: Preprints.org preprint supplement (doi:10.20944/preprints202005.0397.v1), 2020-05-24
Supplement: Supplementary file 7 [file supplementary › S7 File/clusters.dock4.pdb]

REMARK  Energy: 1.33709
REMARK  SimpleFitness: 1.33709
REMARK  FullFitness: -2519.2607
REMARK  InterFull: -30.5056
REMARK  IntraFull: 59.6586
REMARK  solvFull: -2904.39
REMARK  surfFull: 355.976
REMARK  extraFull: 0.0
REMARK  deltaGcompsolvpol: -2904.39
REMARK  deltaGcompsolvnonpol: 355.976
REMARK  deltaGprotsolvpol: -2902.69
REMARK  deltaGprotsolvnonpol: 355.646
REMARK  deltaGligsolvpol: -16.3419
REMARK  deltaGligsolvnonpol: 6.56504
REMARK  deltaGvdw: -30.5056
REMARK  deltaGelec: 0.0
REMARK  deltaG: -6.569576
REMARK  Cluster: 0
REMARK  ClusterRank: 0
ATOM   7134 C    LIG     1      18.556  -0.352  24.396  1.00  0.00      LIG  
ATOM   7135 C1   LIG     1      19.205  -0.964  23.192  1.00  0.00      LIG  
ATOM   7136 O    LIG     1      19.804  -0.291  22.366  1.00  0.00      LIG  
ATOM   7137 N    LIG     1      19.020  -2.324  23.105  1.00  0.00      LIG  
ATOM   7138 C2   LIG     1      19.529  -3.073  21.965  1.00  0.00      LIG  
ATOM   7139 C3   LIG     1      19.736  -4.490  22.440  1.00  0.00      LIG  
ATOM   7140 O1   LIG     1      20.433  -5.280  21.821  1.00  0.00      LIG  
ATOM   7141 C4   LIG     1      18.583  -2.978  20.751  1.00  0.00      LIG  
ATOM   7142 C5   LIG     1      19.182  -3.546  19.457  1.00  0.00      LIG  
ATOM   7143 C6   LIG     1      18.423  -3.026  18.235  1.00  0.00      LIG  
ATOM   7144 C7   LIG     1      19.072  -3.434  16.919  1.00  0.00      LIG  
ATOM   7145 O2   LIG     1      19.218  -4.846  16.856  1.00  0.00      LIG  
ATOM   7146 O3   LIG     1      17.074  -3.490  18.259  1.00  0.00      LIG  
ATOM   7147 O4   LIG     1      20.546  -3.149  19.334  1.00  0.00      LIG  
ATOM   7148 O5   LIG     1      17.324  -3.607  21.022  1.00  0.00      LIG  
ATOM   7149 H    LIG     1      19.255   0.354  24.851  1.00  0.00      LIG  
ATOM   7150 H1   LIG     1      18.293  -1.112  25.139  1.00  0.00      LIG  
ATOM   7151 H2   LIG     1      17.650   0.173  24.081  1.00  0.00      LIG  
ATOM   7152 H3   LIG     1      18.434  -2.789  23.791  1.00  0.00      LIG  
ATOM   7153 H4   LIG     1      20.512  -2.661  21.719  1.00  0.00      LIG  
ATOM   7154 H5   LIG     1      18.960  -4.879  23.120  1.00  0.00      LIG  
ATOM   7155 H6   LIG     1      18.371  -1.919  20.579  1.00  0.00      LIG  
ATOM   7156 H7   LIG     1      19.135  -4.639  19.478  1.00  0.00      LIG  
ATOM   7157 H8   LIG     1      18.398  -1.934  18.263  1.00  0.00      LIG  
ATOM   7158 H9   LIG     1      20.060  -2.981  16.804  1.00  0.00      LIG  
ATOM   7159 H10  LIG     1      18.448  -3.131  16.075  1.00  0.00      LIG  
ATOM   7160 H11  LIG     1      18.342  -5.214  17.074  1.00  0.00      LIG  
ATOM   7161 H12  LIG     1      16.694  -3.311  17.379  1.00  0.00      LIG  
ATOM   7162 H13  LIG     1      21.038  -3.625  20.025  1.00  0.00      LIG  
ATOM   7163 H14  LIG     1      16.896  -3.731  20.154  1.00  0.00      LIG  
TER
REMARK  Energy: 6.44385
REMARK  SimpleFitness: 6.44385
REMARK  FullFitness: -2511.0518
REMARK  InterFull: -29.1277
REMARK  IntraFull: 70.1699
REMARK  solvFull: -2907.84
REMARK  surfFull: 355.746
REMARK  extraFull: 0.0
REMARK  deltaGcompsolvpol: -2907.84
REMARK  deltaGcompsolvnonpol: 355.746
REMARK  deltaGprotsolvpol: -2902.69
REMARK  deltaGprotsolvnonpol: 355.646
REMARK  deltaGligsolvpol: -19.2098
REMARK  deltaGligsolvnonpol: 6.80349
REMARK  deltaGvdw: -29.1277
REMARK  deltaGelec: 0.0
REMARK  deltaG: -6.5191793
REMARK  Cluster: 0
REMARK  ClusterRank: 1
ATOM   7134 C    LIG     1      21.023   0.520  21.970  1.00  0.00      LIG  
ATOM   7135 C1   LIG     1      21.096  -0.755  21.183  1.00  0.00      LIG  
ATOM   7136 O    LIG     1      22.095  -1.066  20.554  1.00  0.00      LIG  
ATOM   7137 N    LIG     1      19.953  -1.520  21.274  1.00  0.00      LIG  
ATOM   7138 C2   LIG     1      19.854  -2.847  20.680  1.00  0.00      LIG  
ATOM   7139 C3   LIG     1      19.917  -3.796  21.860  1.00  0.00      LIG  
ATOM   7140 O1   LIG     1      19.494  -4.942  21.804  1.00  0.00      LIG  
ATOM   7141 C4   LIG     1      18.595  -2.983  19.793  1.00  0.00      LIG  
ATOM   7142 C5   LIG     1      18.672  -4.077  18.714  1.00  0.00      LIG  
ATOM   7143 C6   LIG     1      18.853  -3.451  17.326  1.00  0.00      LIG  
ATOM   7144 C7   LIG     1      20.247  -2.878  17.094  1.00  0.00      LIG  
ATOM   7145 O2   LIG     1      20.283  -2.153  15.867  1.00  0.00      LIG  
ATOM   7146 O3   LIG     1      18.626  -4.455  16.342  1.00  0.00      LIG  
ATOM   7147 O4   LIG     1      19.736  -4.995  18.966  1.00  0.00      LIG  
ATOM   7148 O5   LIG     1      17.407  -3.176  20.570  1.00  0.00      LIG  
ATOM   7149 H    LIG     1      21.149   1.363  21.285  1.00  0.00      LIG  
ATOM   7150 H1   LIG     1      21.825   0.521  22.712  1.00  0.00      LIG  
ATOM   7151 H2   LIG     1      20.063   0.621  22.487  1.00  0.00      LIG  
ATOM   7152 H3   LIG     1      19.191  -1.187  21.857  1.00  0.00      LIG  
ATOM   7153 H4   LIG     1      20.753  -3.012  20.080  1.00  0.00      LIG  
ATOM   7154 H5   LIG     1      20.658  -3.539  22.634  1.00  0.00      LIG  
ATOM   7155 H6   LIG     1      18.431  -2.038  19.271  1.00  0.00      LIG  
ATOM   7156 H7   LIG     1      17.753  -4.673  18.707  1.00  0.00      LIG  
ATOM   7157 H8   LIG     1      18.097  -2.678  17.160  1.00  0.00      LIG  
ATOM   7158 H9   LIG     1      21.000  -3.669  17.032  1.00  0.00      LIG  
ATOM   7159 H10  LIG     1      20.525  -2.188  17.894  1.00  0.00      LIG  
ATOM   7160 H11  LIG     1      19.383  -1.818  15.704  1.00  0.00      LIG  
ATOM   7161 H12  LIG     1      17.751  -4.845  16.535  1.00  0.00      LIG  
ATOM   7162 H13  LIG     1      19.603  -5.342  19.868  1.00  0.00      LIG  
ATOM   7163 H14  LIG     1      17.552  -3.976  21.107  1.00  0.00      LIG  
TER
REMARK  Energy: 8.09675
REMARK  SimpleFitness: 8.09675
REMARK  FullFitness: -2510.953
REMARK  InterFull: -32.4176
REMARK  IntraFull: 70.5596
REMARK  solvFull: -2904.81
REMARK  surfFull: 355.715
REMARK  extraFull: 0.0
REMARK  deltaGcompsolvpol: -2904.81
REMARK  deltaGcompsolvnonpol: 355.715
REMARK  deltaGprotsolvpol: -2902.69
REMARK  deltaGprotsolvnonpol: 355.646
REMARK  deltaGligsolvpol: -19.3055
REMARK  deltaGligsolvnonpol: 7.01927
REMARK  deltaGvdw: -32.4176
REMARK  deltaGelec: 0.0
REMARK  deltaG: -6.6624546
REMARK  Cluster: 0
REMARK  ClusterRank: 2
ATOM   7134 C    LIG     1      22.412  -1.517  21.105  1.00  0.00      LIG  
ATOM   7135 C1   LIG     1      21.004  -1.011  21.003  1.00  0.00      LIG  
ATOM   7136 O    LIG     1      20.782   0.168  20.779  1.00  0.00      LIG  
ATOM   7137 N    LIG     1      19.994  -1.943  21.159  1.00  0.00      LIG  
ATOM   7138 C2   LIG     1      20.138  -3.329  21.603  1.00  0.00      LIG  
ATOM   7139 C3   LIG     1      19.627  -3.315  23.027  1.00  0.00      LIG  
ATOM   7140 O1   LIG     1      18.734  -2.579  23.426  1.00  0.00      LIG  
ATOM   7141 C4   LIG     1      19.321  -4.361  20.797  1.00  0.00      LIG  
ATOM   7142 C5   LIG     1      19.443  -4.267  19.265  1.00  0.00      LIG  
ATOM   7143 C6   LIG     1      18.443  -3.287  18.651  1.00  0.00      LIG  
ATOM   7144 C7   LIG     1      18.650  -3.106  17.150  1.00  0.00      LIG  
ATOM   7145 O2   LIG     1      18.734  -4.362  16.486  1.00  0.00      LIG  
ATOM   7146 O3   LIG     1      17.114  -3.745  18.907  1.00  0.00      LIG  
ATOM   7147 O4   LIG     1      20.774  -3.909  18.896  1.00  0.00      LIG  
ATOM   7148 O5   LIG     1      19.814  -5.651  21.173  1.00  0.00      LIG  
ATOM   7149 H    LIG     1      23.095  -0.693  20.880  1.00  0.00      LIG  
ATOM   7150 H1   LIG     1      22.576  -2.319  20.380  1.00  0.00      LIG  
ATOM   7151 H2   LIG     1      22.606  -1.875  22.120  1.00  0.00      LIG  
ATOM   7152 H3   LIG     1      19.050  -1.571  21.127  1.00  0.00      LIG  
ATOM   7153 H4   LIG     1      21.187  -3.628  21.654  1.00  0.00      LIG  
ATOM   7154 H5   LIG     1      19.956  -4.167  23.642  1.00  0.00      LIG  
ATOM   7155 H6   LIG     1      18.266  -4.335  21.086  1.00  0.00      LIG  
ATOM   7156 H7   LIG     1      19.255  -5.259  18.840  1.00  0.00      LIG  
ATOM   7157 H8   LIG     1      18.535  -2.303  19.113  1.00  0.00      LIG  
ATOM   7158 H9   LIG     1      19.578  -2.563  16.955  1.00  0.00      LIG  
ATOM   7159 H10  LIG     1      17.820  -2.550  16.706  1.00  0.00      LIG  
ATOM   7160 H11  LIG     1      17.845  -4.762  16.532  1.00  0.00      LIG  
ATOM   7161 H12  LIG     1      16.939  -4.480  18.293  1.00  0.00      LIG  
ATOM   7162 H13  LIG     1      21.362  -4.551  19.331  1.00  0.00      LIG  
ATOM   7163 H14  LIG     1      19.167  -6.308  20.858  1.00  0.00      LIG  
TER
REMARK  Energy: 8.22256
REMARK  SimpleFitness: 8.22256
REMARK  FullFitness: -2510.5684
REMARK  InterFull: -32.5404
REMARK  IntraFull: 70.8499
REMARK  solvFull: -2904.81
REMARK  surfFull: 355.932
REMARK  extraFull: 0.0
REMARK  deltaGcompsolvpol: -2904.81
REMARK  deltaGcompsolvnonpol: 355.932
REMARK  deltaGprotsolvpol: -2902.69
REMARK  deltaGprotsolvnonpol: 355.646
REMARK  deltaGligsolvpol: -20.2884
REMARK  deltaGligsolvnonpol: 6.96182
REMARK  deltaGvdw: -32.5404
REMARK  deltaGelec: 0.0
REMARK  deltaG: -6.5879545
REMARK  Cluster: 0
REMARK  ClusterRank: 3
ATOM   7134 C    LIG     1      22.494  -1.516  21.031  1.00  0.00      LIG  
ATOM   7135 C1   LIG     1      21.068  -1.053  20.978  1.00  0.00      LIG  
ATOM   7136 O    LIG     1      20.800   0.121  20.776  1.00  0.00      LIG  
ATOM   7137 N    LIG     1      20.093  -2.018  21.152  1.00  0.00      LIG  
ATOM   7138 C2   LIG     1      20.301  -3.414  21.536  1.00  0.00      LIG  
ATOM   7139 C3   LIG     1      19.926  -3.476  23.005  1.00  0.00      LIG  
ATOM   7140 O1   LIG     1      20.005  -2.530  23.778  1.00  0.00      LIG  
ATOM   7141 C4   LIG     1      19.427  -4.416  20.750  1.00  0.00      LIG  
ATOM   7142 C5   LIG     1      19.489  -4.287  19.217  1.00  0.00      LIG  
ATOM   7143 C6   LIG     1      18.473  -3.288  18.660  1.00  0.00      LIG  
ATOM   7144 C7   LIG     1      18.632  -3.073  17.159  1.00  0.00      LIG  
ATOM   7145 O2   LIG     1      18.703  -4.314  16.464  1.00  0.00      LIG  
ATOM   7146 O3   LIG     1      17.151  -3.749  18.948  1.00  0.00      LIG  
ATOM   7147 O4   LIG     1      20.807  -3.928  18.806  1.00  0.00      LIG  
ATOM   7148 O5   LIG     1      19.904  -5.727  21.069  1.00  0.00      LIG  
ATOM   7149 H    LIG     1      23.146  -0.662  20.833  1.00  0.00      LIG  
ATOM   7150 H1   LIG     1      22.667  -2.278  20.266  1.00  0.00      LIG  
ATOM   7151 H2   LIG     1      22.720  -1.914  22.025  1.00  0.00      LIG  
ATOM   7152 H3   LIG     1      19.139  -1.675  21.153  1.00  0.00      LIG  
ATOM   7153 H4   LIG     1      21.350  -3.712  21.473  1.00  0.00      LIG  
ATOM   7154 H5   LIG     1      19.814  -4.494  23.408  1.00  0.00      LIG  
ATOM   7155 H6   LIG     1      18.386  -4.372  21.087  1.00  0.00      LIG  
ATOM   7156 H7   LIG     1      19.279  -5.268  18.776  1.00  0.00      LIG  
ATOM   7157 H8   LIG     1      18.583  -2.316  19.142  1.00  0.00      LIG  
ATOM   7158 H9   LIG     1      19.552  -2.521  16.948  1.00  0.00      LIG  
ATOM   7159 H10  LIG     1      17.787  -2.511  16.753  1.00  0.00      LIG  
ATOM   7160 H11  LIG     1      17.818  -4.720  16.528  1.00  0.00      LIG  
ATOM   7161 H12  LIG     1      16.959  -4.475  18.328  1.00  0.00      LIG  
ATOM   7162 H13  LIG     1      21.407  -4.586  19.197  1.00  0.00      LIG  
ATOM   7163 H14  LIG     1      19.235  -6.360  20.750  1.00  0.00      LIG  
TER
REMARK  Energy: 8.68002
REMARK  SimpleFitness: 8.68002
REMARK  FullFitness: -2510.3645
REMARK  InterFull: -31.6343
REMARK  IntraFull: 73.985
REMARK  solvFull: -2908.51
REMARK  surfFull: 355.795
REMARK  extraFull: 0.0
REMARK  deltaGcompsolvpol: -2908.51
REMARK  deltaGcompsolvnonpol: 355.795
REMARK  deltaGprotsolvpol: -2902.69
REMARK  deltaGprotsolvnonpol: 355.646
REMARK  deltaGligsolvpol: -19.5125
REMARK  deltaGligsolvnonpol: 7.11115
REMARK  deltaGvdw: -31.6343
REMARK  deltaGelec: 0.0
REMARK  deltaG: -6.8032455
REMARK  Cluster: 0
REMARK  ClusterRank: 4
ATOM   7134 C    LIG     1      20.401  -0.656  21.589  1.00  0.00      LIG  
ATOM   7135 C1   LIG     1      19.804  -2.005  21.338  1.00  0.00      LIG  
ATOM   7136 O    LIG     1      18.838  -2.410  21.965  1.00  0.00      LIG  
ATOM   7137 N    LIG     1      20.539  -2.723  20.414  1.00  0.00      LIG  
ATOM   7138 C2   LIG     1      20.299  -4.117  20.043  1.00  0.00      LIG  
ATOM   7139 C3   LIG     1      20.835  -4.987  21.164  1.00  0.00      LIG  
ATOM   7140 O1   LIG     1      21.769  -4.664  21.885  1.00  0.00      LIG  
ATOM   7141 C4   LIG     1      18.840  -4.465  19.695  1.00  0.00      LIG  
ATOM   7142 C5   LIG     1      18.178  -3.488  18.694  1.00  0.00      LIG  
ATOM   7143 C6   LIG     1      18.680  -3.439  17.233  1.00  0.00      LIG  
ATOM   7144 C7   LIG     1      19.833  -2.461  17.079  1.00  0.00      LIG  
ATOM   7145 O2   LIG     1      20.071  -2.163  15.707  1.00  0.00      LIG  
ATOM   7146 O3   LIG     1      19.104  -4.713  16.757  1.00  0.00      LIG  
ATOM   7147 O4   LIG     1      16.782  -3.787  18.670  1.00  0.00      LIG  
ATOM   7148 O5   LIG     1      18.773  -5.809  19.203  1.00  0.00      LIG  
ATOM   7149 H    LIG     1      21.295  -0.763  22.209  1.00  0.00      LIG  
ATOM   7150 H1   LIG     1      19.665  -0.039  22.110  1.00  0.00      LIG  
ATOM   7151 H2   LIG     1      20.660  -0.172  20.642  1.00  0.00      LIG  
ATOM   7152 H3   LIG     1      21.388  -2.292  20.064  1.00  0.00      LIG  
ATOM   7153 H4   LIG     1      20.928  -4.335  19.176  1.00  0.00      LIG  
ATOM   7154 H5   LIG     1      20.531  -6.043  21.117  1.00  0.00      LIG  
ATOM   7155 H6   LIG     1      18.239  -4.466  20.610  1.00  0.00      LIG  
ATOM   7156 H7   LIG     1      18.236  -2.476  19.099  1.00  0.00      LIG  
ATOM   7157 H8   LIG     1      17.867  -3.126  16.571  1.00  0.00      LIG  
ATOM   7158 H9   LIG     1      20.761  -2.868  17.489  1.00  0.00      LIG  
ATOM   7159 H10  LIG     1      19.595  -1.526  17.590  1.00  0.00      LIG  
ATOM   7160 H11  LIG     1      19.231  -1.828  15.340  1.00  0.00      LIG  
ATOM   7161 H12  LIG     1      18.809  -5.362  17.424  1.00  0.00      LIG  
ATOM   7162 H13  LIG     1      16.662  -4.534  18.052  1.00  0.00      LIG  
ATOM   7163 H14  LIG     1      18.672  -6.394  19.977  1.00  0.00      LIG  
TER
REMARK  Energy: 8.68095
REMARK  SimpleFitness: 8.68095
REMARK  FullFitness: -2503.8518
REMARK  InterFull: -23.1335
REMARK  IntraFull: 70.1128
REMARK  solvFull: -2906.26
REMARK  surfFull: 355.429
REMARK  extraFull: 0.0
REMARK  deltaGcompsolvpol: -2906.26
REMARK  deltaGcompsolvnonpol: 355.429
REMARK  deltaGprotsolvpol: -2902.69
REMARK  deltaGprotsolvnonpol: 355.646
REMARK  deltaGligsolvpol: -18.6095
REMARK  deltaGligsolvnonpol: 6.71244
REMARK  deltaGvdw: -23.1335
REMARK  deltaGelec: 0.0
REMARK  deltaG: -5.913542
REMARK  Cluster: 0
REMARK  ClusterRank: 5
ATOM   7134 C    LIG     1      19.795  -0.145  22.766  1.00  0.00      LIG  
ATOM   7135 C1   LIG     1      19.886  -1.166  21.675  1.00  0.00      LIG  
ATOM   7136 O    LIG     1      20.570  -1.009  20.675  1.00  0.00      LIG  
ATOM   7137 N    LIG     1      19.213  -2.319  21.996  1.00  0.00      LIG  
ATOM   7138 C2   LIG     1      19.313  -3.516  21.182  1.00  0.00      LIG  
ATOM   7139 C3   LIG     1      19.006  -4.638  22.149  1.00  0.00      LIG  
ATOM   7140 O1   LIG     1      18.252  -4.531  23.107  1.00  0.00      LIG  
ATOM   7141 C4   LIG     1      18.419  -3.450  19.916  1.00  0.00      LIG  
ATOM   7142 C5   LIG     1      18.873  -4.350  18.754  1.00  0.00      LIG  
ATOM   7143 C6   LIG     1      19.924  -3.723  17.829  1.00  0.00      LIG  
ATOM   7144 C7   LIG     1      19.297  -2.638  16.963  1.00  0.00      LIG  
ATOM   7145 O2   LIG     1      20.169  -2.309  15.886  1.00  0.00      LIG  
ATOM   7146 O3   LIG     1      21.019  -3.169  18.561  1.00  0.00      LIG  
ATOM   7147 O4   LIG     1      19.365  -5.599  19.240  1.00  0.00      LIG  
ATOM   7148 O5   LIG     1      17.058  -3.776  20.221  1.00  0.00      LIG  
ATOM   7149 H    LIG     1      20.191   0.803  22.393  1.00  0.00      LIG  
ATOM   7150 H1   LIG     1      20.385  -0.474  23.626  1.00  0.00      LIG  
ATOM   7151 H2   LIG     1      18.751  -0.003  23.062  1.00  0.00      LIG  
ATOM   7152 H3   LIG     1      18.667  -2.360  22.851  1.00  0.00      LIG  
ATOM   7153 H4   LIG     1      20.363  -3.613  20.899  1.00  0.00      LIG  
ATOM   7154 H5   LIG     1      19.409  -5.622  21.866  1.00  0.00      LIG  
ATOM   7155 H6   LIG     1      18.388  -2.420  19.550  1.00  0.00      LIG  
ATOM   7156 H7   LIG     1      18.011  -4.599  18.130  1.00  0.00      LIG  
ATOM   7157 H8   LIG     1      20.351  -4.497  17.187  1.00  0.00      LIG  
ATOM   7158 H9   LIG     1      19.115  -1.724  17.534  1.00  0.00      LIG  
ATOM   7159 H10  LIG     1      18.353  -2.984  16.535  1.00  0.00      LIG  
ATOM   7160 H11  LIG     1      20.478  -3.146  15.500  1.00  0.00      LIG  
ATOM   7161 H12  LIG     1      20.694  -2.376  19.026  1.00  0.00      LIG  
ATOM   7162 H13  LIG     1      18.638  -6.024  19.729  1.00  0.00      LIG  
ATOM   7163 H14  LIG     1      16.645  -4.066  19.388  1.00  0.00      LIG  
TER
REMARK  Energy: 3.82075
REMARK  SimpleFitness: 3.82075
REMARK  FullFitness: -2515.739
REMARK  InterFull: -28.155
REMARK  IntraFull: 63.4499
REMARK  solvFull: -2906.2
REMARK  surfFull: 355.166
REMARK  extraFull: 0.0
REMARK  deltaGcompsolvpol: -2906.2
REMARK  deltaGcompsolvnonpol: 355.166
REMARK  deltaGprotsolvpol: -2902.69
REMARK  deltaGprotsolvnonpol: 355.646
REMARK  deltaGligsolvpol: -17.4839
REMARK  deltaGligsolvnonpol: 6.6145
REMARK  deltaGvdw: -28.155
REMARK  deltaGelec: 0.0
REMARK  deltaG: -6.469402
REMARK  Cluster: 1
REMARK  ClusterRank: 0
ATOM   7134 C    LIG     1      23.032  -8.435  19.027  1.00  0.00      LIG  
ATOM   7135 C1   LIG     1      21.755  -7.695  18.758  1.00  0.00      LIG  
ATOM   7136 O    LIG     1      20.940  -8.091  17.939  1.00  0.00      LIG  
ATOM   7137 N    LIG     1      21.593  -6.590  19.563  1.00  0.00      LIG  
ATOM   7138 C2   LIG     1      20.426  -5.724  19.455  1.00  0.00      LIG  
ATOM   7139 C3   LIG     1      19.944  -5.514  20.873  1.00  0.00      LIG  
ATOM   7140 O1   LIG     1      19.198  -4.596  21.183  1.00  0.00      LIG  
ATOM   7141 C4   LIG     1      20.744  -4.426  18.683  1.00  0.00      LIG  
ATOM   7142 C5   LIG     1      19.479  -3.867  18.031  1.00  0.00      LIG  
ATOM   7143 C6   LIG     1      19.657  -2.498  17.365  1.00  0.00      LIG  
ATOM   7144 C7   LIG     1      20.352  -2.532  16.004  1.00  0.00      LIG  
ATOM   7145 O2   LIG     1      21.728  -2.863  16.125  1.00  0.00      LIG  
ATOM   7146 O3   LIG     1      18.361  -1.939  17.169  1.00  0.00      LIG  
ATOM   7147 O4   LIG     1      19.014  -4.805  17.065  1.00  0.00      LIG  
ATOM   7148 O5   LIG     1      21.370  -3.435  19.506  1.00  0.00      LIG  
ATOM   7149 H    LIG     1      23.495  -8.693  18.071  1.00  0.00      LIG  
ATOM   7150 H1   LIG     1      22.801  -9.345  19.586  1.00  0.00      LIG  
ATOM   7151 H2   LIG     1      23.735  -7.825  19.603  1.00  0.00      LIG  
ATOM   7152 H3   LIG     1      22.343  -6.330  20.195  1.00  0.00      LIG  
ATOM   7153 H4   LIG     1      19.644  -6.290  18.942  1.00  0.00      LIG  
ATOM   7154 H5   LIG     1      19.994  -6.402  21.524  1.00  0.00      LIG  
ATOM   7155 H6   LIG     1      21.460  -4.668  17.896  1.00  0.00      LIG  
ATOM   7156 H7   LIG     1      18.700  -3.786  18.794  1.00  0.00      LIG  
ATOM   7157 H8   LIG     1      20.192  -1.833  18.044  1.00  0.00      LIG  
ATOM   7158 H9   LIG     1      20.281  -1.555  15.519  1.00  0.00      LIG  
ATOM   7159 H10  LIG     1      19.873  -3.246  15.335  1.00  0.00      LIG  
ATOM   7160 H11  LIG     1      22.078  -2.923  15.219  1.00  0.00      LIG  
ATOM   7161 H12  LIG     1      18.396  -1.393  16.363  1.00  0.00      LIG  
ATOM   7162 H13  LIG     1      18.121  -4.512  16.806  1.00  0.00      LIG  
ATOM   7163 H14  LIG     1      20.751  -3.247  20.234  1.00  0.00      LIG  
TER
REMARK  Energy: 3.86982
REMARK  SimpleFitness: 3.86982
REMARK  FullFitness: -2515.674
REMARK  InterFull: -28.4801
REMARK  IntraFull: 63.741
REMARK  solvFull: -2906.09
REMARK  surfFull: 355.155
REMARK  extraFull: 0.0
REMARK  deltaGcompsolvpol: -2906.09
REMARK  deltaGcompsolvnonpol: 355.155
REMARK  deltaGprotsolvpol: -2902.69
REMARK  deltaGprotsolvnonpol: 355.646
REMARK  deltaGligsolvpol: -17.6344
REMARK  deltaGligsolvnonpol: 6.61453
REMARK  deltaGvdw: -28.4801
REMARK  deltaGelec: 0.0
REMARK  deltaG: -6.4852643
REMARK  Cluster: 1
REMARK  ClusterRank: 1
ATOM   7134 C    LIG     1      22.950  -8.428  19.166  1.00  0.00      LIG  
ATOM   7135 C1   LIG     1      21.700  -7.661  18.853  1.00  0.00      LIG  
ATOM   7136 O    LIG     1      20.917  -8.026  17.990  1.00  0.00      LIG  
ATOM   7137 N    LIG     1      21.513  -6.576  19.680  1.00  0.00      LIG  
ATOM   7138 C2   LIG     1      20.366  -5.692  19.534  1.00  0.00      LIG  
ATOM   7139 C3   LIG     1      19.876  -5.428  20.941  1.00  0.00      LIG  
ATOM   7140 O1   LIG     1      19.137  -4.494  21.214  1.00  0.00      LIG  
ATOM   7141 C4   LIG     1      20.714  -4.425  18.723  1.00  0.00      LIG  
ATOM   7142 C5   LIG     1      19.460  -3.874  18.043  1.00  0.00      LIG  
ATOM   7143 C6   LIG     1      19.641  -2.507  17.371  1.00  0.00      LIG  
ATOM   7144 C7   LIG     1      20.346  -2.546  16.016  1.00  0.00      LIG  
ATOM   7145 O2   LIG     1      21.717  -2.893  16.147  1.00  0.00      LIG  
ATOM   7146 O3   LIG     1      18.345  -1.954  17.163  1.00  0.00      LIG  
ATOM   7147 O4   LIG     1      19.019  -4.822  17.075  1.00  0.00      LIG  
ATOM   7148 O5   LIG     1      21.342  -3.417  19.523  1.00  0.00      LIG  
ATOM   7149 H    LIG     1      23.431  -8.710  18.226  1.00  0.00      LIG  
ATOM   7150 H1   LIG     1      22.684  -9.324  19.731  1.00  0.00      LIG  
ATOM   7151 H2   LIG     1      23.653  -7.825  19.751  1.00  0.00      LIG  
ATOM   7152 H3   LIG     1      22.240  -6.338  20.347  1.00  0.00      LIG  
ATOM   7153 H4   LIG     1      19.578  -6.261  19.031  1.00  0.00      LIG  
ATOM   7154 H5   LIG     1      19.913  -6.294  21.623  1.00  0.00      LIG  
ATOM   7155 H6   LIG     1      21.434  -4.701  17.951  1.00  0.00      LIG  
ATOM   7156 H7   LIG     1      18.666  -3.795  18.790  1.00  0.00      LIG  
ATOM   7157 H8   LIG     1      20.169  -1.836  18.049  1.00  0.00      LIG  
ATOM   7158 H9   LIG     1      20.289  -1.567  15.533  1.00  0.00      LIG  
ATOM   7159 H10  LIG     1      19.864  -3.253  15.342  1.00  0.00      LIG  
ATOM   7160 H11  LIG     1      22.072  -2.963  15.244  1.00  0.00      LIG  
ATOM   7161 H12  LIG     1      18.383  -1.419  16.348  1.00  0.00      LIG  
ATOM   7162 H13  LIG     1      18.121  -4.550  16.812  1.00  0.00      LIG  
ATOM   7163 H14  LIG     1      20.716  -3.197  20.236  1.00  0.00      LIG  
TER
REMARK  Energy: -0.168407
REMARK  SimpleFitness: -0.168407
REMARK  FullFitness: -2515.7173
REMARK  InterFull: -34.8415
REMARK  IntraFull: 61.6614
REMARK  solvFull: -2898.02
REMARK  surfFull: 355.483
REMARK  extraFull: 0.0
REMARK  deltaGcompsolvpol: -2898.02
REMARK  deltaGcompsolvnonpol: 355.483
REMARK  deltaGprotsolvpol: -2902.69
REMARK  deltaGprotsolvnonpol: 355.646
REMARK  deltaGligsolvpol: -16.2697
REMARK  deltaGligsolvnonpol: 6.83753
REMARK  deltaGvdw: -34.8415
REMARK  deltaGelec: 0.0
REMARK  deltaG: -6.666751
REMARK  Cluster: 2
REMARK  ClusterRank: 0
ATOM   7134 C    LIG     1       5.837 -16.673  40.615  1.00  0.00      LIG  
ATOM   7135 C1   LIG     1       6.561 -16.080  41.787  1.00  0.00      LIG  
ATOM   7136 O    LIG     1       7.363 -16.717  42.454  1.00  0.00      LIG  
ATOM   7137 N    LIG     1       6.275 -14.749  41.972  1.00  0.00      LIG  
ATOM   7138 C2   LIG     1       6.903 -13.970  43.027  1.00  0.00      LIG  
ATOM   7139 C3   LIG     1       6.827 -12.529  42.591  1.00  0.00      LIG  
ATOM   7140 O1   LIG     1       6.985 -11.597  43.366  1.00  0.00      LIG  
ATOM   7141 C4   LIG     1       6.315 -14.195  44.436  1.00  0.00      LIG  
ATOM   7142 C5   LIG     1       4.821 -14.576  44.451  1.00  0.00      LIG  
ATOM   7143 C6   LIG     1       4.192 -14.652  45.850  1.00  0.00      LIG  
ATOM   7144 C7   LIG     1       4.468 -15.991  46.526  1.00  0.00      LIG  
ATOM   7145 O2   LIG     1       3.555 -16.193  47.599  1.00  0.00      LIG  
ATOM   7146 O3   LIG     1       4.681 -13.593  46.675  1.00  0.00      LIG  
ATOM   7147 O4   LIG     1       4.081 -13.621  43.697  1.00  0.00      LIG  
ATOM   7148 O5   LIG     1       7.083 -15.216  45.073  1.00  0.00      LIG  
ATOM   7149 H    LIG     1       5.532 -17.691  40.870  1.00  0.00      LIG  
ATOM   7150 H1   LIG     1       6.509 -16.690  39.753  1.00  0.00      LIG  
ATOM   7151 H2   LIG     1       4.943 -16.092  40.366  1.00  0.00      LIG  
ATOM   7152 H3   LIG     1       5.549 -14.316  41.407  1.00  0.00      LIG  
ATOM   7153 H4   LIG     1       7.966 -14.233  43.016  1.00  0.00      LIG  
ATOM   7154 H5   LIG     1       6.997 -12.358  41.515  1.00  0.00      LIG  
ATOM   7155 H6   LIG     1       6.466 -13.292  45.032  1.00  0.00      LIG  
ATOM   7156 H7   LIG     1       4.676 -15.545  43.967  1.00  0.00      LIG  
ATOM   7157 H8   LIG     1       3.110 -14.501  45.778  1.00  0.00      LIG  
ATOM   7158 H9   LIG     1       5.478 -16.032  46.942  1.00  0.00      LIG  
ATOM   7159 H10  LIG     1       4.336 -16.814  45.819  1.00  0.00      LIG  
ATOM   7160 H11  LIG     1       2.665 -16.023  47.241  1.00  0.00      LIG  
ATOM   7161 H12  LIG     1       5.620 -13.780  46.844  1.00  0.00      LIG  
ATOM   7162 H13  LIG     1       4.018 -12.817  44.246  1.00  0.00      LIG  
ATOM   7163 H14  LIG     1       7.208 -15.919  44.408  1.00  0.00      LIG  
TER
REMARK  Energy: 1.10494
REMARK  SimpleFitness: 1.10494
REMARK  FullFitness: -2513.7385
REMARK  InterFull: -30.725
REMARK  IntraFull: 59.4424
REMARK  solvFull: -2897.91
REMARK  surfFull: 355.454
REMARK  extraFull: 0.0
REMARK  deltaGcompsolvpol: -2897.91
REMARK  deltaGcompsolvnonpol: 355.454
REMARK  deltaGprotsolvpol: -2902.69
REMARK  deltaGprotsolvnonpol: 355.646
REMARK  deltaGligsolvpol: -15.1976
REMARK  deltaGligsolvnonpol: 6.83457
REMARK  deltaGvdw: -30.725
REMARK  deltaGelec: 0.0
REMARK  deltaG: -6.3386664
REMARK  Cluster: 2
REMARK  ClusterRank: 1
ATOM   7134 C    LIG     1       5.308 -16.333  40.374  1.00  0.00      LIG  
ATOM   7135 C1   LIG     1       6.253 -15.946  41.472  1.00  0.00      LIG  
ATOM   7136 O    LIG     1       7.137 -16.691  41.869  1.00  0.00      LIG  
ATOM   7137 N    LIG     1       6.055 -14.659  41.913  1.00  0.00      LIG  
ATOM   7138 C2   LIG     1       6.913 -14.037  42.909  1.00  0.00      LIG  
ATOM   7139 C3   LIG     1       6.703 -12.555  42.754  1.00  0.00      LIG  
ATOM   7140 O1   LIG     1       6.957 -11.747  43.636  1.00  0.00      LIG  
ATOM   7141 C4   LIG     1       6.708 -14.520  44.358  1.00  0.00      LIG  
ATOM   7142 C5   LIG     1       5.286 -14.978  44.700  1.00  0.00      LIG  
ATOM   7143 C6   LIG     1       5.192 -15.443  46.165  1.00  0.00      LIG  
ATOM   7144 C7   LIG     1       5.426 -14.360  47.221  1.00  0.00      LIG  
ATOM   7145 O2   LIG     1       4.507 -13.281  47.123  1.00  0.00      LIG  
ATOM   7146 O3   LIG     1       3.929 -16.064  46.396  1.00  0.00      LIG  
ATOM   7147 O4   LIG     1       4.349 -13.942  44.411  1.00  0.00      LIG  
ATOM   7148 O5   LIG     1       7.606 -15.602  44.599  1.00  0.00      LIG  
ATOM   7149 H    LIG     1       5.021 -17.378  40.511  1.00  0.00      LIG  
ATOM   7150 H1   LIG     1       5.811 -16.208  39.412  1.00  0.00      LIG  
ATOM   7151 H2   LIG     1       4.403 -15.717  40.393  1.00  0.00      LIG  
ATOM   7152 H3   LIG     1       5.278 -14.125  41.533  1.00  0.00      LIG  
ATOM   7153 H4   LIG     1       7.943 -14.233  42.596  1.00  0.00      LIG  
ATOM   7154 H5   LIG     1       6.688 -12.205  41.710  1.00  0.00      LIG  
ATOM   7155 H6   LIG     1       7.004 -13.725  45.047  1.00  0.00      LIG  
ATOM   7156 H7   LIG     1       5.013 -15.830  44.070  1.00  0.00      LIG  
ATOM   7157 H8   LIG     1       5.936 -16.225  46.334  1.00  0.00      LIG  
ATOM   7158 H9   LIG     1       6.433 -13.948  47.136  1.00  0.00      LIG  
ATOM   7159 H10  LIG     1       5.317 -14.783  48.224  1.00  0.00      LIG  
ATOM   7160 H11  LIG     1       3.622 -13.665  47.245  1.00  0.00      LIG  
ATOM   7161 H12  LIG     1       3.259 -15.536  45.924  1.00  0.00      LIG  
ATOM   7162 H13  LIG     1       4.471 -13.250  45.088  1.00  0.00      LIG  
ATOM   7163 H14  LIG     1       7.532 -16.197  43.828  1.00  0.00      LIG  
TER
REMARK  Energy: 2.30413
REMARK  SimpleFitness: 2.30413
REMARK  FullFitness: -2513.5222
REMARK  InterFull: -33.1957
REMARK  IntraFull: 61.8586
REMARK  solvFull: -2897.73
REMARK  surfFull: 355.545
REMARK  extraFull: 0.0
REMARK  deltaGcompsolvpol: -2897.73
REMARK  deltaGcompsolvnonpol: 355.545
REMARK  deltaGprotsolvpol: -2902.69
REMARK  deltaGprotsolvnonpol: 355.646
REMARK  deltaGligsolvpol: -16.1032
REMARK  deltaGligsolvnonpol: 6.83798
REMARK  deltaGvdw: -33.1957
REMARK  deltaGelec: 0.0
REMARK  deltaG: -6.4976735
REMARK  Cluster: 2
REMARK  ClusterRank: 2
ATOM   7134 C    LIG     1       6.005 -16.674  41.287  1.00  0.00      LIG  
ATOM   7135 C1   LIG     1       6.718 -15.948  42.387  1.00  0.00      LIG  
ATOM   7136 O    LIG     1       7.610 -16.464  43.042  1.00  0.00      LIG  
ATOM   7137 N    LIG     1       6.206 -14.693  42.617  1.00  0.00      LIG  
ATOM   7138 C2   LIG     1       6.742 -13.838  43.663  1.00  0.00      LIG  
ATOM   7139 C3   LIG     1       6.461 -12.412  43.272  1.00  0.00      LIG  
ATOM   7140 O1   LIG     1       6.995 -11.469  43.839  1.00  0.00      LIG  
ATOM   7141 C4   LIG     1       6.200 -14.139  45.075  1.00  0.00      LIG  
ATOM   7142 C5   LIG     1       4.739 -14.632  45.135  1.00  0.00      LIG  
ATOM   7143 C6   LIG     1       4.137 -14.638  46.554  1.00  0.00      LIG  
ATOM   7144 C7   LIG     1       4.499 -15.871  47.368  1.00  0.00      LIG  
ATOM   7145 O2   LIG     1       4.027 -17.044  46.720  1.00  0.00      LIG  
ATOM   7146 O3   LIG     1       4.535 -13.480  47.285  1.00  0.00      LIG  
ATOM   7147 O4   LIG     1       3.909 -13.801  44.326  1.00  0.00      LIG  
ATOM   7148 O5   LIG     1       7.053 -15.110  45.679  1.00  0.00      LIG  
ATOM   7149 H    LIG     1       5.262 -17.344  41.727  1.00  0.00      LIG  
ATOM   7150 H1   LIG     1       6.737 -17.253  40.717  1.00  0.00      LIG  
ATOM   7151 H2   LIG     1       5.507 -15.975  40.607  1.00  0.00      LIG  
ATOM   7152 H3   LIG     1       5.407 -14.376  42.076  1.00  0.00      LIG  
ATOM   7153 H4   LIG     1       7.829 -13.960  43.650  1.00  0.00      LIG  
ATOM   7154 H5   LIG     1       5.491 -12.243  42.786  1.00  0.00      LIG  
ATOM   7155 H6   LIG     1       6.305 -13.233  45.677  1.00  0.00      LIG  
ATOM   7156 H7   LIG     1       4.675 -15.640  44.716  1.00  0.00      LIG  
ATOM   7157 H8   LIG     1       3.047 -14.596  46.471  1.00  0.00      LIG  
ATOM   7158 H9   LIG     1       4.047 -15.817  48.363  1.00  0.00      LIG  
ATOM   7159 H10  LIG     1       5.577 -15.956  47.520  1.00  0.00      LIG  
ATOM   7160 H11  LIG     1       3.078 -16.902  46.554  1.00  0.00      LIG  
ATOM   7161 H12  LIG     1       5.496 -13.548  47.419  1.00  0.00      LIG  
ATOM   7162 H13  LIG     1       3.827 -12.945  44.787  1.00  0.00      LIG  
ATOM   7163 H14  LIG     1       7.187 -15.809  45.012  1.00  0.00      LIG  
TER
REMARK  Energy: 9.29913
REMARK  SimpleFitness: 9.29913
REMARK  FullFitness: -2505.8503
REMARK  InterFull: -41.0726
REMARK  IntraFull: 77.4131
REMARK  solvFull: -2897.65
REMARK  surfFull: 355.459
REMARK  extraFull: 0.0
REMARK  deltaGcompsolvpol: -2897.65
REMARK  deltaGcompsolvnonpol: 355.459
REMARK  deltaGprotsolvpol: -2902.69
REMARK  deltaGprotsolvnonpol: 355.646
REMARK  deltaGligsolvpol: -22.0214
REMARK  deltaGligsolvnonpol: 7.02245
REMARK  deltaGvdw: -41.0726
REMARK  deltaGelec: 0.0
REMARK  deltaG: -6.90132
REMARK  Cluster: 2
REMARK  ClusterRank: 3
ATOM   7134 C    LIG     1       5.175 -16.477  40.042  1.00  0.00      LIG  
ATOM   7135 C1   LIG     1       6.199 -16.117  41.078  1.00  0.00      LIG  
ATOM   7136 O    LIG     1       7.053 -16.910  41.442  1.00  0.00      LIG  
ATOM   7137 N    LIG     1       6.057 -14.830  41.549  1.00  0.00      LIG  
ATOM   7138 C2   LIG     1       6.922 -14.274  42.577  1.00  0.00      LIG  
ATOM   7139 C3   LIG     1       7.041 -12.814  42.209  1.00  0.00      LIG  
ATOM   7140 O1   LIG     1       7.286 -11.931  43.019  1.00  0.00      LIG  
ATOM   7141 C4   LIG     1       6.465 -14.484  44.032  1.00  0.00      LIG  
ATOM   7142 C5   LIG     1       5.128 -13.807  44.408  1.00  0.00      LIG  
ATOM   7143 C6   LIG     1       3.837 -14.640  44.526  1.00  0.00      LIG  
ATOM   7144 C7   LIG     1       3.397 -15.213  43.186  1.00  0.00      LIG  
ATOM   7145 O2   LIG     1       2.003 -15.486  43.177  1.00  0.00      LIG  
ATOM   7146 O3   LIG     1       3.968 -15.699  45.478  1.00  0.00      LIG  
ATOM   7147 O4   LIG     1       5.334 -13.160  45.667  1.00  0.00      LIG  
ATOM   7148 O5   LIG     1       6.495 -15.869  44.370  1.00  0.00      LIG  
ATOM   7149 H    LIG     1       4.578 -17.312  40.416  1.00  0.00      LIG  
ATOM   7150 H1   LIG     1       5.692 -16.773  39.126  1.00  0.00      LIG  
ATOM   7151 H2   LIG     1       4.510 -15.637  39.818  1.00  0.00      LIG  
ATOM   7152 H3   LIG     1       5.302 -14.257  41.180  1.00  0.00      LIG  
ATOM   7153 H4   LIG     1       7.909 -14.731  42.454  1.00  0.00      LIG  
ATOM   7154 H5   LIG     1       7.211 -12.613  41.138  1.00  0.00      LIG  
ATOM   7155 H6   LIG     1       7.255 -14.040  44.647  1.00  0.00      LIG  
ATOM   7156 H7   LIG     1       4.934 -13.003  43.696  1.00  0.00      LIG  
ATOM   7157 H8   LIG     1       3.048 -13.993  44.923  1.00  0.00      LIG  
ATOM   7158 H9   LIG     1       3.921 -16.146  42.961  1.00  0.00      LIG  
ATOM   7159 H10  LIG     1       3.581 -14.492  42.387  1.00  0.00      LIG  
ATOM   7160 H11  LIG     1       1.744 -15.665  44.099  1.00  0.00      LIG  
ATOM   7161 H12  LIG     1       3.062 -15.984  45.700  1.00  0.00      LIG  
ATOM   7162 H13  LIG     1       4.595 -12.535  45.778  1.00  0.00      LIG  
ATOM   7163 H14  LIG     1       5.779 -16.005  45.020  1.00  0.00      LIG  
TER
REMARK  Energy: 8.78986
REMARK  SimpleFitness: 8.78986
REMARK  FullFitness: -2505.3218
REMARK  InterFull: -30.7627
REMARK  IntraFull: 72.1211
REMARK  solvFull: -2902.08
REMARK  surfFull: 355.4
REMARK  extraFull: 0.0
REMARK  deltaGcompsolvpol: -2902.08
REMARK  deltaGcompsolvnonpol: 355.4
REMARK  deltaGprotsolvpol: -2902.69
REMARK  deltaGprotsolvnonpol: 355.646
REMARK  deltaGligsolvpol: -19.5658
REMARK  deltaGligsolvnonpol: 6.97194
REMARK  deltaGvdw: -30.7627
REMARK  deltaGelec: 0.0
REMARK  deltaG: -6.348218
REMARK  Cluster: 2
REMARK  ClusterRank: 4
ATOM   7134 C    LIG     1       7.043 -16.888  41.701  1.00  0.00      LIG  
ATOM   7135 C1   LIG     1       6.030 -15.907  41.186  1.00  0.00      LIG  
ATOM   7136 O    LIG     1       5.260 -16.216  40.290  1.00  0.00      LIG  
ATOM   7137 N    LIG     1       5.952 -14.684  41.827  1.00  0.00      LIG  
ATOM   7138 C2   LIG     1       6.860 -14.140  42.835  1.00  0.00      LIG  
ATOM   7139 C3   LIG     1       6.721 -12.646  42.674  1.00  0.00      LIG  
ATOM   7140 O1   LIG     1       6.984 -11.846  43.560  1.00  0.00      LIG  
ATOM   7141 C4   LIG     1       6.627 -14.591  44.296  1.00  0.00      LIG  
ATOM   7142 C5   LIG     1       5.236 -15.163  44.595  1.00  0.00      LIG  
ATOM   7143 C6   LIG     1       5.147 -15.693  46.039  1.00  0.00      LIG  
ATOM   7144 C7   LIG     1       5.267 -14.637  47.142  1.00  0.00      LIG  
ATOM   7145 O2   LIG     1       4.264 -13.632  47.055  1.00  0.00      LIG  
ATOM   7146 O3   LIG     1       3.936 -16.426  46.211  1.00  0.00      LIG  
ATOM   7147 O4   LIG     1       4.241 -14.172  44.333  1.00  0.00      LIG  
ATOM   7148 O5   LIG     1       7.612 -15.569  44.628  1.00  0.00      LIG  
ATOM   7149 H    LIG     1       8.017 -16.415  41.847  1.00  0.00      LIG  
ATOM   7150 H1   LIG     1       7.159 -17.685  40.962  1.00  0.00      LIG  
ATOM   7151 H2   LIG     1       6.689 -17.317  42.642  1.00  0.00      LIG  
ATOM   7152 H3   LIG     1       5.248 -14.052  41.452  1.00  0.00      LIG  
ATOM   7153 H4   LIG     1       7.880 -14.378  42.519  1.00  0.00      LIG  
ATOM   7154 H5   LIG     1       6.734 -12.294  41.630  1.00  0.00      LIG  
ATOM   7155 H6   LIG     1       6.810 -13.755  44.976  1.00  0.00      LIG  
ATOM   7156 H7   LIG     1       5.026 -16.005  43.930  1.00  0.00      LIG  
ATOM   7157 H8   LIG     1       5.946 -16.421  46.198  1.00  0.00      LIG  
ATOM   7158 H9   LIG     1       6.240 -14.144  47.101  1.00  0.00      LIG  
ATOM   7159 H10  LIG     1       5.165 -15.108  48.124  1.00  0.00      LIG  
ATOM   7160 H11  LIG     1       4.147 -13.441  46.106  1.00  0.00      LIG  
ATOM   7161 H12  LIG     1       3.204 -15.789  46.121  1.00  0.00      LIG  
ATOM   7162 H13  LIG     1       4.291 -13.967  43.384  1.00  0.00      LIG  
ATOM   7163 H14  LIG     1       7.466 -16.330  44.040  1.00  0.00      LIG  
TER
REMARK  Energy: 12.9679
REMARK  SimpleFitness: 12.9679
REMARK  FullFitness: -2499.9565
REMARK  InterFull: -27.7955
REMARK  IntraFull: 74.3408
REMARK  solvFull: -2901.8
REMARK  surfFull: 355.298
REMARK  extraFull: 0.0
REMARK  deltaGcompsolvpol: -2901.8
REMARK  deltaGcompsolvnonpol: 355.298
REMARK  deltaGprotsolvpol: -2902.69
REMARK  deltaGprotsolvnonpol: 355.646
REMARK  deltaGligsolvpol: -16.0537
REMARK  deltaGligsolvnonpol: 6.53412
REMARK  deltaGvdw: -27.7955
REMARK  deltaGelec: 0.0
REMARK  deltaG: -6.2335544
REMARK  Cluster: 2
REMARK  ClusterRank: 5
ATOM   7134 C    LIG     1       4.985 -16.146  40.705  1.00  0.00      LIG  
ATOM   7135 C1   LIG     1       5.104 -15.194  41.860  1.00  0.00      LIG  
ATOM   7136 O    LIG     1       4.115 -14.830  42.477  1.00  0.00      LIG  
ATOM   7137 N    LIG     1       6.419 -14.854  42.124  1.00  0.00      LIG  
ATOM   7138 C2   LIG     1       6.907 -13.825  43.050  1.00  0.00      LIG  
ATOM   7139 C3   LIG     1       7.089 -12.612  42.146  1.00  0.00      LIG  
ATOM   7140 O1   LIG     1       7.360 -11.495  42.562  1.00  0.00      LIG  
ATOM   7141 C4   LIG     1       6.075 -13.530  44.328  1.00  0.00      LIG  
ATOM   7142 C5   LIG     1       5.999 -14.683  45.364  1.00  0.00      LIG  
ATOM   7143 C6   LIG     1       4.704 -14.724  46.202  1.00  0.00      LIG  
ATOM   7144 C7   LIG     1       4.768 -13.903  47.488  1.00  0.00      LIG  
ATOM   7145 O2   LIG     1       4.939 -12.513  47.245  1.00  0.00      LIG  
ATOM   7146 O3   LIG     1       3.566 -14.324  45.438  1.00  0.00      LIG  
ATOM   7147 O4   LIG     1       6.136 -15.957  44.743  1.00  0.00      LIG  
ATOM   7148 O5   LIG     1       6.644 -12.428  45.036  1.00  0.00      LIG  
ATOM   7149 H    LIG     1       4.511 -17.066  41.056  1.00  0.00      LIG  
ATOM   7150 H1   LIG     1       5.962 -16.392  40.276  1.00  0.00      LIG  
ATOM   7151 H2   LIG     1       4.366 -15.682  39.932  1.00  0.00      LIG  
ATOM   7152 H3   LIG     1       7.113 -15.236  41.488  1.00  0.00      LIG  
ATOM   7153 H4   LIG     1       7.914 -14.140  43.332  1.00  0.00      LIG  
ATOM   7154 H5   LIG     1       7.322 -12.831  41.090  1.00  0.00      LIG  
ATOM   7155 H6   LIG     1       5.083 -13.204  44.014  1.00  0.00      LIG  
ATOM   7156 H7   LIG     1       6.838 -14.617  46.064  1.00  0.00      LIG  
ATOM   7157 H8   LIG     1       4.509 -15.757  46.506  1.00  0.00      LIG  
ATOM   7158 H9   LIG     1       5.598 -14.244  48.114  1.00  0.00      LIG  
ATOM   7159 H10  LIG     1       3.838 -14.016  48.052  1.00  0.00      LIG  
ATOM   7160 H11  LIG     1       4.223 -12.253  46.637  1.00  0.00      LIG  
ATOM   7161 H12  LIG     1       3.622 -14.773  44.575  1.00  0.00      LIG  
ATOM   7162 H13  LIG     1       5.573 -15.941  43.949  1.00  0.00      LIG  
ATOM   7163 H14  LIG     1       6.088 -12.281  45.824  1.00  0.00      LIG  
TER
REMARK  Energy: 8.9146
REMARK  SimpleFitness: 8.9146
REMARK  FullFitness: -2499.2456
REMARK  InterFull: -26.2251
REMARK  IntraFull: 72.3917
REMARK  solvFull: -2900.82
REMARK  surfFull: 355.408
REMARK  extraFull: 0.0
REMARK  deltaGcompsolvpol: -2900.82
REMARK  deltaGcompsolvnonpol: 355.408
REMARK  deltaGprotsolvpol: -2902.69
REMARK  deltaGprotsolvnonpol: 355.646
REMARK  deltaGligsolvpol: -21.3655
REMARK  deltaGligsolvnonpol: 6.78378
REMARK  deltaGvdw: -26.2251
REMARK  deltaGelec: 0.0
REMARK  deltaG: -5.7131505
REMARK  Cluster: 2
REMARK  ClusterRank: 6
ATOM   7134 C    LIG     1       6.944 -16.860  42.218  1.00  0.00      LIG  
ATOM   7135 C1   LIG     1       6.216 -15.914  41.308  1.00  0.00      LIG  
ATOM   7136 O    LIG     1       5.866 -16.255  40.188  1.00  0.00      LIG  
ATOM   7137 N    LIG     1       6.020 -14.636  41.790  1.00  0.00      LIG  
ATOM   7138 C2   LIG     1       6.339 -14.143  43.127  1.00  0.00      LIG  
ATOM   7139 C3   LIG     1       6.673 -12.678  42.951  1.00  0.00      LIG  
ATOM   7140 O1   LIG     1       7.164 -12.213  41.932  1.00  0.00      LIG  
ATOM   7141 C4   LIG     1       5.186 -14.388  44.127  1.00  0.00      LIG  
ATOM   7142 C5   LIG     1       5.514 -13.895  45.539  1.00  0.00      LIG  
ATOM   7143 C6   LIG     1       4.419 -14.190  46.577  1.00  0.00      LIG  
ATOM   7144 C7   LIG     1       4.430 -15.615  47.127  1.00  0.00      LIG  
ATOM   7145 O2   LIG     1       3.988 -16.548  46.154  1.00  0.00      LIG  
ATOM   7146 O3   LIG     1       4.615 -13.313  47.686  1.00  0.00      LIG  
ATOM   7147 O4   LIG     1       6.754 -14.447  45.968  1.00  0.00      LIG  
ATOM   7148 O5   LIG     1       3.960 -13.785  43.699  1.00  0.00      LIG  
ATOM   7149 H    LIG     1       7.034 -17.825  41.714  1.00  0.00      LIG  
ATOM   7150 H1   LIG     1       6.384 -16.998  43.147  1.00  0.00      LIG  
ATOM   7151 H2   LIG     1       7.946 -16.476  42.429  1.00  0.00      LIG  
ATOM   7152 H3   LIG     1       5.535 -13.991  41.171  1.00  0.00      LIG  
ATOM   7153 H4   LIG     1       7.250 -14.624  43.492  1.00  0.00      LIG  
ATOM   7154 H5   LIG     1       6.744 -12.095  43.880  1.00  0.00      LIG  
ATOM   7155 H6   LIG     1       5.012 -15.465  44.152  1.00  0.00      LIG  
ATOM   7156 H7   LIG     1       5.652 -12.811  45.507  1.00  0.00      LIG  
ATOM   7157 H8   LIG     1       3.436 -13.963  46.155  1.00  0.00      LIG  
ATOM   7158 H9   LIG     1       3.766 -15.693  47.993  1.00  0.00      LIG  
ATOM   7159 H10  LIG     1       5.425 -15.907  47.474  1.00  0.00      LIG  
ATOM   7160 H11  LIG     1       3.084 -16.277  45.908  1.00  0.00      LIG  
ATOM   7161 H12  LIG     1       4.574 -12.406  47.337  1.00  0.00      LIG  
ATOM   7162 H13  LIG     1       6.827 -14.210  46.909  1.00  0.00      LIG  
ATOM   7163 H14  LIG     1       4.015 -12.834  43.903  1.00  0.00      LIG  
TER
REMARK  Energy: 27.1908
REMARK  SimpleFitness: 27.1908
REMARK  FullFitness: -2487.8591
REMARK  InterFull: -29.2454
REMARK  IntraFull: 88.5704
REMARK  solvFull: -2902.62
REMARK  surfFull: 355.436
REMARK  extraFull: 0.0
REMARK  deltaGcompsolvpol: -2902.62
REMARK  deltaGcompsolvnonpol: 355.436
REMARK  deltaGprotsolvpol: -2902.69
REMARK  deltaGprotsolvnonpol: 355.646
REMARK  deltaGligsolvpol: -19.4253
REMARK  deltaGligsolvnonpol: 6.9367
REMARK  deltaGvdw: -29.2454
REMARK  deltaGelec: 0.0
REMARK  deltaG: -6.23959
REMARK  Cluster: 2
REMARK  ClusterRank: 7
ATOM   7134 C    LIG     1       3.914 -15.103  42.436  1.00  0.00      LIG  
ATOM   7135 C1   LIG     1       4.971 -15.672  41.543  1.00  0.00      LIG  
ATOM   7136 O    LIG     1       4.667 -16.438  40.643  1.00  0.00      LIG  
ATOM   7137 N    LIG     1       6.294 -15.344  41.791  1.00  0.00      LIG  
ATOM   7138 C2   LIG     1       6.922 -14.420  42.751  1.00  0.00      LIG  
ATOM   7139 C3   LIG     1       6.847 -13.029  42.152  1.00  0.00      LIG  
ATOM   7140 O1   LIG     1       7.245 -12.015  42.706  1.00  0.00      LIG  
ATOM   7141 C4   LIG     1       6.678 -14.617  44.280  1.00  0.00      LIG  
ATOM   7142 C5   LIG     1       5.755 -13.598  44.997  1.00  0.00      LIG  
ATOM   7143 C6   LIG     1       5.203 -14.010  46.371  1.00  0.00      LIG  
ATOM   7144 C7   LIG     1       3.878 -14.745  46.242  1.00  0.00      LIG  
ATOM   7145 O2   LIG     1       3.242 -14.821  47.515  1.00  0.00      LIG  
ATOM   7146 O3   LIG     1       6.136 -14.836  47.062  1.00  0.00      LIG  
ATOM   7147 O4   LIG     1       6.492 -12.399  45.225  1.00  0.00      LIG  
ATOM   7148 O5   LIG     1       6.291 -15.969  44.546  1.00  0.00      LIG  
ATOM   7149 H    LIG     1       2.946 -15.217  41.942  1.00  0.00      LIG  
ATOM   7150 H1   LIG     1       4.084 -14.039  42.608  1.00  0.00      LIG  
ATOM   7151 H2   LIG     1       3.899 -15.646  43.383  1.00  0.00      LIG  
ATOM   7152 H3   LIG     1       6.943 -15.756  41.127  1.00  0.00      LIG  
ATOM   7153 H4   LIG     1       7.973 -14.685  42.614  1.00  0.00      LIG  
ATOM   7154 H5   LIG     1       6.756 -13.004  41.054  1.00  0.00      LIG  
ATOM   7155 H6   LIG     1       7.664 -14.508  44.740  1.00  0.00      LIG  
ATOM   7156 H7   LIG     1       4.917 -13.325  44.357  1.00  0.00      LIG  
ATOM   7157 H8   LIG     1       5.052 -13.129  47.005  1.00  0.00      LIG  
ATOM   7158 H9   LIG     1       3.207 -14.210  45.565  1.00  0.00      LIG  
ATOM   7159 H10  LIG     1       4.016 -15.766  45.877  1.00  0.00      LIG  
ATOM   7160 H11  LIG     1       3.288 -13.932  47.904  1.00  0.00      LIG  
ATOM   7161 H12  LIG     1       6.254 -15.619  46.493  1.00  0.00      LIG  
ATOM   7162 H13  LIG     1       6.797 -12.085  44.352  1.00  0.00      LIG  
ATOM   7163 H14  LIG     1       6.627 -16.505  43.806  1.00  0.00      LIG  
TER
REMARK  Energy: 4.07915
REMARK  SimpleFitness: 4.07915
REMARK  FullFitness: -2515.6238
REMARK  InterFull: -23.6632
REMARK  IntraFull: 59.2965
REMARK  solvFull: -2906.36
REMARK  surfFull: 355.103
REMARK  extraFull: 0.0
REMARK  deltaGcompsolvpol: -2906.36
REMARK  deltaGcompsolvnonpol: 355.103
REMARK  deltaGprotsolvpol: -2902.69
REMARK  deltaGprotsolvnonpol: 355.646
REMARK  deltaGligsolvpol: -14.5313
REMARK  deltaGligsolvnonpol: 6.37416
REMARK  deltaGvdw: -23.6632
REMARK  deltaGelec: 0.0
REMARK  deltaG: -6.2182007
REMARK  Cluster: 3
REMARK  ClusterRank: 0
ATOM   7134 C    LIG     1      16.960  28.484  17.364  1.00  0.00      LIG  
ATOM   7135 C1   LIG     1      17.864  27.291  17.250  1.00  0.00      LIG  
ATOM   7136 O    LIG     1      19.008  27.373  16.832  1.00  0.00      LIG  
ATOM   7137 N    LIG     1      17.268  26.120  17.662  1.00  0.00      LIG  
ATOM   7138 C2   LIG     1      17.934  24.819  17.611  1.00  0.00      LIG  
ATOM   7139 C3   LIG     1      18.825  24.734  18.840  1.00  0.00      LIG  
ATOM   7140 O1   LIG     1      19.327  23.692  19.240  1.00  0.00      LIG  
ATOM   7141 C4   LIG     1      16.893  23.685  17.517  1.00  0.00      LIG  
ATOM   7142 C5   LIG     1      17.491  22.318  17.151  1.00  0.00      LIG  
ATOM   7143 C6   LIG     1      16.413  21.230  17.061  1.00  0.00      LIG  
ATOM   7144 C7   LIG     1      16.903  19.962  16.368  1.00  0.00      LIG  
ATOM   7145 O2   LIG     1      18.093  19.480  16.984  1.00  0.00      LIG  
ATOM   7146 O3   LIG     1      15.955  20.879  18.368  1.00  0.00      LIG  
ATOM   7147 O4   LIG     1      18.150  22.443  15.892  1.00  0.00      LIG  
ATOM   7148 O5   LIG     1      16.128  23.604  18.720  1.00  0.00      LIG  
ATOM   7149 H    LIG     1      16.541  28.716  16.383  1.00  0.00      LIG  
ATOM   7150 H1   LIG     1      17.547  29.334  17.723  1.00  0.00      LIG  
ATOM   7151 H2   LIG     1      16.145  28.300  18.071  1.00  0.00      LIG  
ATOM   7152 H3   LIG     1      16.344  26.167  18.080  1.00  0.00      LIG  
ATOM   7153 H4   LIG     1      18.593  24.823  16.737  1.00  0.00      LIG  
ATOM   7154 H5   LIG     1      19.294  25.683  19.143  1.00  0.00      LIG  
ATOM   7155 H6   LIG     1      16.188  23.953  16.723  1.00  0.00      LIG  
ATOM   7156 H7   LIG     1      18.225  22.014  17.900  1.00  0.00      LIG  
ATOM   7157 H8   LIG     1      15.553  21.611  16.509  1.00  0.00      LIG  
ATOM   7158 H9   LIG     1      17.113  20.147  15.311  1.00  0.00      LIG  
ATOM   7159 H10  LIG     1      16.151  19.172  16.446  1.00  0.00      LIG  
ATOM   7160 H11  LIG     1      18.333  18.664  16.513  1.00  0.00      LIG  
ATOM   7161 H12  LIG     1      16.618  20.262  18.724  1.00  0.00      LIG  
ATOM   7162 H13  LIG     1      18.942  22.987  16.043  1.00  0.00      LIG  
ATOM   7163 H14  LIG     1      15.742  22.708  18.735  1.00  0.00      LIG  
TER
REMARK  Energy: 4.07915
REMARK  SimpleFitness: 4.07915
REMARK  FullFitness: -2515.6238
REMARK  InterFull: -23.6632
REMARK  IntraFull: 59.2965
REMARK  solvFull: -2906.36
REMARK  surfFull: 355.103
REMARK  extraFull: 0.0
REMARK  deltaGcompsolvpol: -2906.36
REMARK  deltaGcompsolvnonpol: 355.103
REMARK  deltaGprotsolvpol: -2902.69
REMARK  deltaGprotsolvnonpol: 355.646
REMARK  deltaGligsolvpol: -14.5313
REMARK  deltaGligsolvnonpol: 6.37416
REMARK  deltaGvdw: -23.6632
REMARK  deltaGelec: 0.0
REMARK  deltaG: -6.2182007
REMARK  Cluster: 3
REMARK  ClusterRank: 1
ATOM   7134 C    LIG     1      16.960  28.484  17.364  1.00  0.00      LIG  
ATOM   7135 C1   LIG     1      17.864  27.291  17.250  1.00  0.00      LIG  
ATOM   7136 O    LIG     1      19.008  27.373  16.832  1.00  0.00      LIG  
ATOM   7137 N    LIG     1      17.268  26.120  17.662  1.00  0.00      LIG  
ATOM   7138 C2   LIG     1      17.934  24.819  17.611  1.00  0.00      LIG  
ATOM   7139 C3   LIG     1      18.825  24.734  18.840  1.00  0.00      LIG  
ATOM   7140 O1   LIG     1      19.327  23.692  19.240  1.00  0.00      LIG  
ATOM   7141 C4   LIG     1      16.893  23.685  17.517  1.00  0.00      LIG  
ATOM   7142 C5   LIG     1      17.491  22.318  17.151  1.00  0.00      LIG  
ATOM   7143 C6   LIG     1      16.413  21.230  17.061  1.00  0.00      LIG  
ATOM   7144 C7   LIG     1      16.903  19.962  16.368  1.00  0.00      LIG  
ATOM   7145 O2   LIG     1      18.093  19.480  16.984  1.00  0.00      LIG  
ATOM   7146 O3   LIG     1      15.955  20.879  18.368  1.00  0.00      LIG  
ATOM   7147 O4   LIG     1      18.150  22.443  15.892  1.00  0.00      LIG  
ATOM   7148 O5   LIG     1      16.128  23.604  18.720  1.00  0.00      LIG  
ATOM   7149 H    LIG     1      16.541  28.716  16.383  1.00  0.00      LIG  
ATOM   7150 H1   LIG     1      17.547  29.334  17.723  1.00  0.00      LIG  
ATOM   7151 H2   LIG     1      16.145  28.300  18.071  1.00  0.00      LIG  
ATOM   7152 H3   LIG     1      16.344  26.167  18.080  1.00  0.00      LIG  
ATOM   7153 H4   LIG     1      18.593  24.823  16.737  1.00  0.00      LIG  
ATOM   7154 H5   LIG     1      19.294  25.683  19.143  1.00  0.00      LIG  
ATOM   7155 H6   LIG     1      16.188  23.953  16.723  1.00  0.00      LIG  
ATOM   7156 H7   LIG     1      18.225  22.014  17.900  1.00  0.00      LIG  
ATOM   7157 H8   LIG     1      15.553  21.611  16.509  1.00  0.00      LIG  
ATOM   7158 H9   LIG     1      17.113  20.147  15.311  1.00  0.00      LIG  
ATOM   7159 H10  LIG     1      16.151  19.172  16.446  1.00  0.00      LIG  
ATOM   7160 H11  LIG     1      18.333  18.664  16.513  1.00  0.00      LIG  
ATOM   7161 H12  LIG     1      16.618  20.262  18.724  1.00  0.00      LIG  
ATOM   7162 H13  LIG     1      18.942  22.987  16.043  1.00  0.00      LIG  
ATOM   7163 H14  LIG     1      15.742  22.708  18.735  1.00  0.00      LIG  
TER
REMARK  Energy: 4.07915
REMARK  SimpleFitness: 4.07915
REMARK  FullFitness: -2515.6238
REMARK  InterFull: -23.6632
REMARK  IntraFull: 59.2965
REMARK  solvFull: -2906.36
REMARK  surfFull: 355.103
REMARK  extraFull: 0.0
REMARK  deltaGcompsolvpol: -2906.36
REMARK  deltaGcompsolvnonpol: 355.103
REMARK  deltaGprotsolvpol: -2902.69
REMARK  deltaGprotsolvnonpol: 355.646
REMARK  deltaGligsolvpol: -14.5313
REMARK  deltaGligsolvnonpol: 6.37416
REMARK  deltaGvdw: -23.6632
REMARK  deltaGelec: 0.0
REMARK  deltaG: -6.2182007
REMARK  Cluster: 3
REMARK  ClusterRank: 2
ATOM   7134 C    LIG     1      16.960  28.484  17.364  1.00  0.00      LIG  
ATOM   7135 C1   LIG     1      17.864  27.291  17.250  1.00  0.00      LIG  
ATOM   7136 O    LIG     1      19.008  27.373  16.832  1.00  0.00      LIG  
ATOM   7137 N    LIG     1      17.268  26.120  17.662  1.00  0.00      LIG  
ATOM   7138 C2   LIG     1      17.934  24.819  17.611  1.00  0.00      LIG  
ATOM   7139 C3   LIG     1      18.825  24.734  18.840  1.00  0.00      LIG  
ATOM   7140 O1   LIG     1      19.327  23.692  19.240  1.00  0.00      LIG  
ATOM   7141 C4   LIG     1      16.893  23.685  17.517  1.00  0.00      LIG  
ATOM   7142 C5   LIG     1      17.491  22.318  17.151  1.00  0.00      LIG  
ATOM   7143 C6   LIG     1      16.413  21.230  17.061  1.00  0.00      LIG  
ATOM   7144 C7   LIG     1      16.903  19.962  16.368  1.00  0.00      LIG  
ATOM   7145 O2   LIG     1      18.093  19.480  16.984  1.00  0.00      LIG  
ATOM   7146 O3   LIG     1      15.955  20.879  18.368  1.00  0.00      LIG  
ATOM   7147 O4   LIG     1      18.150  22.443  15.892  1.00  0.00      LIG  
ATOM   7148 O5   LIG     1      16.128  23.604  18.720  1.00  0.00      LIG  
ATOM   7149 H    LIG     1      16.541  28.716  16.383  1.00  0.00      LIG  
ATOM   7150 H1   LIG     1      17.547  29.334  17.723  1.00  0.00      LIG  
ATOM   7151 H2   LIG     1      16.145  28.300  18.071  1.00  0.00      LIG  
ATOM   7152 H3   LIG     1      16.344  26.167  18.080  1.00  0.00      LIG  
ATOM   7153 H4   LIG     1      18.593  24.823  16.737  1.00  0.00      LIG  
ATOM   7154 H5   LIG     1      19.294  25.683  19.143  1.00  0.00      LIG  
ATOM   7155 H6   LIG     1      16.188  23.953  16.723  1.00  0.00      LIG  
ATOM   7156 H7   LIG     1      18.225  22.014  17.900  1.00  0.00      LIG  
ATOM   7157 H8   LIG     1      15.553  21.611  16.509  1.00  0.00      LIG  
ATOM   7158 H9   LIG     1      17.113  20.147  15.311  1.00  0.00      LIG  
ATOM   7159 H10  LIG     1      16.151  19.172  16.446  1.00  0.00      LIG  
ATOM   7160 H11  LIG     1      18.333  18.664  16.513  1.00  0.00      LIG  
ATOM   7161 H12  LIG     1      16.618  20.262  18.724  1.00  0.00      LIG  
ATOM   7162 H13  LIG     1      18.942  22.987  16.043  1.00  0.00      LIG  
ATOM   7163 H14  LIG     1      15.742  22.708  18.735  1.00  0.00      LIG  
TER
REMARK  Energy: 1.95528
REMARK  SimpleFitness: 1.95528
REMARK  FullFitness: -2514.5415
REMARK  InterFull: -25.2194
REMARK  IntraFull: 60.583
REMARK  solvFull: -2905.36
REMARK  surfFull: 355.455
REMARK  extraFull: 0.0
REMARK  deltaGcompsolvpol: -2905.36
REMARK  deltaGcompsolvnonpol: 355.455
REMARK  deltaGprotsolvpol: -2902.69
REMARK  deltaGprotsolvnonpol: 355.646
REMARK  deltaGligsolvpol: -15.0081
REMARK  deltaGligsolvnonpol: 6.69694
REMARK  deltaGvdw: -25.2194
REMARK  deltaGelec: 0.0
REMARK  deltaG: -6.2722735
REMARK  Cluster: 3
REMARK  ClusterRank: 3
ATOM   7134 C    LIG     1      16.197  27.767  17.603  1.00  0.00      LIG  
ATOM   7135 C1   LIG     1      16.447  26.323  17.284  1.00  0.00      LIG  
ATOM   7136 O    LIG     1      15.691  25.660  16.590  1.00  0.00      LIG  
ATOM   7137 N    LIG     1      17.596  25.844  17.865  1.00  0.00      LIG  
ATOM   7138 C2   LIG     1      18.040  24.473  17.680  1.00  0.00      LIG  
ATOM   7139 C3   LIG     1      19.550  24.560  17.753  1.00  0.00      LIG  
ATOM   7140 O1   LIG     1      20.155  25.391  18.418  1.00  0.00      LIG  
ATOM   7141 C4   LIG     1      17.385  23.510  18.701  1.00  0.00      LIG  
ATOM   7142 C5   LIG     1      17.395  22.035  18.266  1.00  0.00      LIG  
ATOM   7143 C6   LIG     1      16.401  21.784  17.129  1.00  0.00      LIG  
ATOM   7144 C7   LIG     1      16.458  20.353  16.607  1.00  0.00      LIG  
ATOM   7145 O2   LIG     1      17.571  20.174  15.741  1.00  0.00      LIG  
ATOM   7146 O3   LIG     1      15.089  22.037  17.622  1.00  0.00      LIG  
ATOM   7147 O4   LIG     1      18.708  21.636  17.882  1.00  0.00      LIG  
ATOM   7148 O5   LIG     1      17.992  23.611  19.995  1.00  0.00      LIG  
ATOM   7149 H    LIG     1      15.673  28.232  16.766  1.00  0.00      LIG  
ATOM   7150 H1   LIG     1      17.139  28.303  17.759  1.00  0.00      LIG  
ATOM   7151 H2   LIG     1      15.584  27.834  18.505  1.00  0.00      LIG  
ATOM   7152 H3   LIG     1      18.170  26.470  18.422  1.00  0.00      LIG  
ATOM   7153 H4   LIG     1      17.776  24.185  16.659  1.00  0.00      LIG  
ATOM   7154 H5   LIG     1      20.093  23.729  17.278  1.00  0.00      LIG  
ATOM   7155 H6   LIG     1      16.343  23.809  18.848  1.00  0.00      LIG  
ATOM   7156 H7   LIG     1      17.115  21.413  19.122  1.00  0.00      LIG  
ATOM   7157 H8   LIG     1      16.599  22.473  16.304  1.00  0.00      LIG  
ATOM   7158 H9   LIG     1      15.552  20.104  16.048  1.00  0.00      LIG  
ATOM   7159 H10  LIG     1      16.534  19.642  17.434  1.00  0.00      LIG  
ATOM   7160 H11  LIG     1      18.344  20.506  16.232  1.00  0.00      LIG  
ATOM   7161 H12  LIG     1      14.541  22.267  16.847  1.00  0.00      LIG  
ATOM   7162 H13  LIG     1      19.274  21.786  18.660  1.00  0.00      LIG  
ATOM   7163 H14  LIG     1      18.060  24.560  20.198  1.00  0.00      LIG  
TER
REMARK  Energy: 1.89457
REMARK  SimpleFitness: 1.89457
REMARK  FullFitness: -2514.4038
REMARK  InterFull: -24.9154
REMARK  IntraFull: 60.4944
REMARK  solvFull: -2905.44
REMARK  surfFull: 355.457
REMARK  extraFull: 0.0
REMARK  deltaGcompsolvpol: -2905.44
REMARK  deltaGcompsolvnonpol: 355.457
REMARK  deltaGprotsolvpol: -2902.69
REMARK  deltaGprotsolvnonpol: 355.646
REMARK  deltaGligsolvpol: -14.9673
REMARK  deltaGligsolvnonpol: 6.68872
REMARK  deltaGvdw: -24.9154
REMARK  deltaGelec: 0.0
REMARK  deltaG: -6.24993
REMARK  Cluster: 3
REMARK  ClusterRank: 4
ATOM   7134 C    LIG     1      16.176  27.898  17.595  1.00  0.00      LIG  
ATOM   7135 C1   LIG     1      16.395  26.442  17.300  1.00  0.00      LIG  
ATOM   7136 O    LIG     1      15.585  25.764  16.688  1.00  0.00      LIG  
ATOM   7137 N    LIG     1      17.588  25.973  17.793  1.00  0.00      LIG  
ATOM   7138 C2   LIG     1      18.009  24.595  17.602  1.00  0.00      LIG  
ATOM   7139 C3   LIG     1      19.522  24.669  17.601  1.00  0.00      LIG  
ATOM   7140 O1   LIG     1      20.166  25.500  18.228  1.00  0.00      LIG  
ATOM   7141 C4   LIG     1      17.396  23.646  18.662  1.00  0.00      LIG  
ATOM   7142 C5   LIG     1      17.410  22.161  18.264  1.00  0.00      LIG  
ATOM   7143 C6   LIG     1      16.403  21.872  17.149  1.00  0.00      LIG  
ATOM   7144 C7   LIG     1      16.461  20.428  16.663  1.00  0.00      LIG  
ATOM   7145 O2   LIG     1      17.567  20.232  15.791  1.00  0.00      LIG  
ATOM   7146 O3   LIG     1      15.096  22.129  17.652  1.00  0.00      LIG  
ATOM   7147 O4   LIG     1      18.721  21.758  17.875  1.00  0.00      LIG  
ATOM   7148 O5   LIG     1      18.040  23.786  19.935  1.00  0.00      LIG  
ATOM   7149 H    LIG     1      15.664  28.360  16.748  1.00  0.00      LIG  
ATOM   7150 H1   LIG     1      17.127  28.418  17.748  1.00  0.00      LIG  
ATOM   7151 H2   LIG     1      15.561  27.992  18.493  1.00  0.00      LIG  
ATOM   7152 H3   LIG     1      18.208  26.608  18.286  1.00  0.00      LIG  
ATOM   7153 H4   LIG     1      17.693  24.300  16.598  1.00  0.00      LIG  
ATOM   7154 H5   LIG     1      20.033  23.834  17.099  1.00  0.00      LIG  
ATOM   7155 H6   LIG     1      16.356  23.937  18.833  1.00  0.00      LIG  
ATOM   7156 H7   LIG     1      17.146  21.560  19.141  1.00  0.00      LIG  
ATOM   7157 H8   LIG     1      16.585  22.540  16.304  1.00  0.00      LIG  
ATOM   7158 H9   LIG     1      15.550  20.163  16.118  1.00  0.00      LIG  
ATOM   7159 H10  LIG     1      16.547  19.739  17.507  1.00  0.00      LIG  
ATOM   7160 H11  LIG     1      18.343  20.578  16.267  1.00  0.00      LIG  
ATOM   7161 H12  LIG     1      14.539  22.346  16.880  1.00  0.00      LIG  
ATOM   7162 H13  LIG     1      19.297  21.942  18.638  1.00  0.00      LIG  
ATOM   7163 H14  LIG     1      18.105  24.740  20.111  1.00  0.00      LIG  
TER
REMARK  Energy: 6.07512
REMARK  SimpleFitness: 6.07512
REMARK  FullFitness: -2513.82
REMARK  InterFull: -20.1753
REMARK  IntraFull: 58.9764
REMARK  solvFull: -2907.83
REMARK  surfFull: 355.209
REMARK  extraFull: 0.0
REMARK  deltaGcompsolvpol: -2907.83
REMARK  deltaGcompsolvnonpol: 355.209
REMARK  deltaGprotsolvpol: -2902.69
REMARK  deltaGprotsolvnonpol: 355.646
REMARK  deltaGligsolvpol: -14.8039
REMARK  deltaGligsolvnonpol: 6.39477
REMARK  deltaGvdw: -20.1753
REMARK  deltaGelec: 0.0
REMARK  deltaG: -5.953445
REMARK  Cluster: 3
REMARK  ClusterRank: 5
ATOM   7134 C    LIG     1      18.602  28.621  17.349  1.00  0.00      LIG  
ATOM   7135 C1   LIG     1      19.100  27.222  17.147  1.00  0.00      LIG  
ATOM   7136 O    LIG     1      20.169  26.984  16.604  1.00  0.00      LIG  
ATOM   7137 N    LIG     1      18.283  26.269  17.718  1.00  0.00      LIG  
ATOM   7138 C2   LIG     1      18.622  24.848  17.730  1.00  0.00      LIG  
ATOM   7139 C3   LIG     1      19.424  24.626  19.002  1.00  0.00      LIG  
ATOM   7140 O1   LIG     1      19.656  23.520  19.467  1.00  0.00      LIG  
ATOM   7141 C4   LIG     1      17.359  23.967  17.615  1.00  0.00      LIG  
ATOM   7142 C5   LIG     1      17.683  22.506  17.265  1.00  0.00      LIG  
ATOM   7143 C6   LIG     1      16.415  21.656  17.137  1.00  0.00      LIG  
ATOM   7144 C7   LIG     1      16.656  20.330  16.418  1.00  0.00      LIG  
ATOM   7145 O2   LIG     1      17.687  19.588  17.061  1.00  0.00      LIG  
ATOM   7146 O3   LIG     1      15.857  21.385  18.423  1.00  0.00      LIG  
ATOM   7147 O4   LIG     1      18.389  22.491  16.026  1.00  0.00      LIG  
ATOM   7148 O5   LIG     1      16.557  24.059  18.794  1.00  0.00      LIG  
ATOM   7149 H    LIG     1      18.887  29.224  16.483  1.00  0.00      LIG  
ATOM   7150 H1   LIG     1      19.058  29.037  18.251  1.00  0.00      LIG  
ATOM   7151 H2   LIG     1      17.511  28.643  17.447  1.00  0.00      LIG  
ATOM   7152 H3   LIG     1      17.469  26.575  18.240  1.00  0.00      LIG  
ATOM   7153 H4   LIG     1      19.299  24.664  16.891  1.00  0.00      LIG  
ATOM   7154 H5   LIG     1      20.090  25.457  19.286  1.00  0.00      LIG  
ATOM   7155 H6   LIG     1      16.749  24.369  16.799  1.00  0.00      LIG  
ATOM   7156 H7   LIG     1      18.320  22.068  18.037  1.00  0.00      LIG  
ATOM   7157 H8   LIG     1      15.669  22.218  16.579  1.00  0.00      LIG  
ATOM   7158 H9   LIG     1      16.949  20.494  15.377  1.00  0.00      LIG  
ATOM   7159 H10  LIG     1      15.752  19.717  16.431  1.00  0.00      LIG  
ATOM   7160 H11  LIG     1      17.763  18.751  16.572  1.00  0.00      LIG  
ATOM   7161 H12  LIG     1      16.410  20.683  18.809  1.00  0.00      LIG  
ATOM   7162 H13  LIG     1      19.241  22.938  16.177  1.00  0.00      LIG  
ATOM   7163 H14  LIG     1      15.971  23.278  18.790  1.00  0.00      LIG  
TER
REMARK  Energy: 6.07512
REMARK  SimpleFitness: 6.07512
REMARK  FullFitness: -2513.82
REMARK  InterFull: -20.1753
REMARK  IntraFull: 58.9764
REMARK  solvFull: -2907.83
REMARK  surfFull: 355.209
REMARK  extraFull: 0.0
REMARK  deltaGcompsolvpol: -2907.83
REMARK  deltaGcompsolvnonpol: 355.209
REMARK  deltaGprotsolvpol: -2902.69
REMARK  deltaGprotsolvnonpol: 355.646
REMARK  deltaGligsolvpol: -14.8039
REMARK  deltaGligsolvnonpol: 6.39477
REMARK  deltaGvdw: -20.1753
REMARK  deltaGelec: 0.0
REMARK  deltaG: -5.953445
REMARK  Cluster: 3
REMARK  ClusterRank: 6
ATOM   7134 C    LIG     1      18.602  28.621  17.349  1.00  0.00      LIG  
ATOM   7135 C1   LIG     1      19.100  27.222  17.147  1.00  0.00      LIG  
ATOM   7136 O    LIG     1      20.169  26.984  16.604  1.00  0.00      LIG  
ATOM   7137 N    LIG     1      18.283  26.269  17.718  1.00  0.00      LIG  
ATOM   7138 C2   LIG     1      18.622  24.848  17.730  1.00  0.00      LIG  
ATOM   7139 C3   LIG     1      19.424  24.626  19.002  1.00  0.00      LIG  
ATOM   7140 O1   LIG     1      19.656  23.520  19.467  1.00  0.00      LIG  
ATOM   7141 C4   LIG     1      17.359  23.967  17.615  1.00  0.00      LIG  
ATOM   7142 C5   LIG     1      17.683  22.506  17.265  1.00  0.00      LIG  
ATOM   7143 C6   LIG     1      16.415  21.656  17.137  1.00  0.00      LIG  
ATOM   7144 C7   LIG     1      16.656  20.330  16.418  1.00  0.00      LIG  
ATOM   7145 O2   LIG     1      17.687  19.588  17.061  1.00  0.00      LIG  
ATOM   7146 O3   LIG     1      15.857  21.385  18.423  1.00  0.00      LIG  
ATOM   7147 O4   LIG     1      18.389  22.491  16.026  1.00  0.00      LIG  
ATOM   7148 O5   LIG     1      16.557  24.059  18.794  1.00  0.00      LIG  
ATOM   7149 H    LIG     1      18.887  29.224  16.483  1.00  0.00      LIG  
ATOM   7150 H1   LIG     1      19.058  29.037  18.251  1.00  0.00      LIG  
ATOM   7151 H2   LIG     1      17.511  28.643  17.447  1.00  0.00      LIG  
ATOM   7152 H3   LIG     1      17.469  26.575  18.240  1.00  0.00      LIG  
ATOM   7153 H4   LIG     1      19.299  24.664  16.891  1.00  0.00      LIG  
ATOM   7154 H5   LIG     1      20.090  25.457  19.286  1.00  0.00      LIG  
ATOM   7155 H6   LIG     1      16.749  24.369  16.799  1.00  0.00      LIG  
ATOM   7156 H7   LIG     1      18.320  22.068  18.037  1.00  0.00      LIG  
ATOM   7157 H8   LIG     1      15.669  22.218  16.579  1.00  0.00      LIG  
ATOM   7158 H9   LIG     1      16.949  20.494  15.377  1.00  0.00      LIG  
ATOM   7159 H10  LIG     1      15.752  19.717  16.431  1.00  0.00      LIG  
ATOM   7160 H11  LIG     1      17.763  18.751  16.572  1.00  0.00      LIG  
ATOM   7161 H12  LIG     1      16.410  20.683  18.809  1.00  0.00      LIG  
ATOM   7162 H13  LIG     1      19.241  22.938  16.177  1.00  0.00      LIG  
ATOM   7163 H14  LIG     1      15.971  23.278  18.790  1.00  0.00      LIG  
TER
REMARK  Energy: 5.87414
REMARK  SimpleFitness: 5.87414
REMARK  FullFitness: -2513.6396
REMARK  InterFull: -22.4604
REMARK  IntraFull: 61.6848
REMARK  solvFull: -2907.97
REMARK  surfFull: 355.106
REMARK  extraFull: 0.0
REMARK  deltaGcompsolvpol: -2907.97
REMARK  deltaGcompsolvnonpol: 355.106
REMARK  deltaGprotsolvpol: -2902.69
REMARK  deltaGprotsolvnonpol: 355.646
REMARK  deltaGligsolvpol: -15.9693
REMARK  deltaGligsolvnonpol: 6.38337
REMARK  deltaGvdw: -22.4604
REMARK  deltaGelec: 0.0
REMARK  deltaG: -6.115522
REMARK  Cluster: 3
REMARK  ClusterRank: 7
ATOM   7134 C    LIG     1      17.165  28.441  17.313  1.00  0.00      LIG  
ATOM   7135 C1   LIG     1      18.035  27.221  17.234  1.00  0.00      LIG  
ATOM   7136 O    LIG     1      19.178  27.258  16.803  1.00  0.00      LIG  
ATOM   7137 N    LIG     1      17.403  26.079  17.669  1.00  0.00      LIG  
ATOM   7138 C2   LIG     1      18.027  24.760  17.634  1.00  0.00      LIG  
ATOM   7139 C3   LIG     1      18.893  24.653  18.881  1.00  0.00      LIG  
ATOM   7140 O1   LIG     1      19.337  23.598  19.307  1.00  0.00      LIG  
ATOM   7141 C4   LIG     1      16.954  23.657  17.521  1.00  0.00      LIG  
ATOM   7142 C5   LIG     1      17.526  22.286  17.135  1.00  0.00      LIG  
ATOM   7143 C6   LIG     1      16.433  21.211  17.048  1.00  0.00      LIG  
ATOM   7144 C7   LIG     1      16.897  19.951  16.320  1.00  0.00      LIG  
ATOM   7145 O2   LIG     1      18.103  19.442  16.883  1.00  0.00      LIG  
ATOM   7146 O3   LIG     1      15.987  20.851  18.357  1.00  0.00      LIG  
ATOM   7147 O4   LIG     1      18.174  22.416  15.871  1.00  0.00      LIG  
ATOM   7148 O5   LIG     1      16.176  23.581  18.717  1.00  0.00      LIG  
ATOM   7149 H    LIG     1      16.794  28.679  16.315  1.00  0.00      LIG  
ATOM   7150 H1   LIG     1      17.761  29.276  17.691  1.00  0.00      LIG  
ATOM   7151 H2   LIG     1      16.317  28.286  17.988  1.00  0.00      LIG  
ATOM   7152 H3   LIG     1      16.482  26.164  18.088  1.00  0.00      LIG  
ATOM   7153 H4   LIG     1      18.701  24.743  16.772  1.00  0.00      LIG  
ATOM   7154 H5   LIG     1      19.404  25.585  19.175  1.00  0.00      LIG  
ATOM   7155 H6   LIG     1      16.262  23.952  16.726  1.00  0.00      LIG  
ATOM   7156 H7   LIG     1      18.265  21.965  17.873  1.00  0.00      LIG  
ATOM   7157 H8   LIG     1      15.568  21.607  16.514  1.00  0.00      LIG  
ATOM   7158 H9   LIG     1      17.080  20.159  15.263  1.00  0.00      LIG  
ATOM   7159 H10  LIG     1      16.142  19.164  16.393  1.00  0.00      LIG  
ATOM   7160 H11  LIG     1      17.862  19.031  17.730  1.00  0.00      LIG  
ATOM   7161 H12  LIG     1      16.764  20.516  18.837  1.00  0.00      LIG  
ATOM   7162 H13  LIG     1      18.974  22.951  16.017  1.00  0.00      LIG  
ATOM   7163 H14  LIG     1      15.726  22.717  18.696  1.00  0.00      LIG  
TER
REMARK  Energy: 5.87414
REMARK  SimpleFitness: 5.87414
REMARK  FullFitness: -2513.6396
REMARK  InterFull: -22.4604
REMARK  IntraFull: 61.6848
REMARK  solvFull: -2907.97
REMARK  surfFull: 355.106
REMARK  extraFull: 0.0
REMARK  deltaGcompsolvpol: -2907.97
REMARK  deltaGcompsolvnonpol: 355.106
REMARK  deltaGprotsolvpol: -2902.69
REMARK  deltaGprotsolvnonpol: 355.646
REMARK  deltaGligsolvpol: -15.9693
REMARK  deltaGligsolvnonpol: 6.38337
REMARK  deltaGvdw: -22.4604
REMARK  deltaGelec: 0.0
REMARK  deltaG: -6.115522
REMARK  Cluster: 3
REMARK  ClusterRank: 8
ATOM   7134 C    LIG     1      17.165  28.441  17.313  1.00  0.00      LIG  
ATOM   7135 C1   LIG     1      18.035  27.221  17.234  1.00  0.00      LIG  
ATOM   7136 O    LIG     1      19.178  27.258  16.803  1.00  0.00      LIG  
ATOM   7137 N    LIG     1      17.403  26.079  17.669  1.00  0.00      LIG  
ATOM   7138 C2   LIG     1      18.027  24.760  17.634  1.00  0.00      LIG  
ATOM   7139 C3   LIG     1      18.893  24.653  18.881  1.00  0.00      LIG  
ATOM   7140 O1   LIG     1      19.337  23.598  19.307  1.00  0.00      LIG  
ATOM   7141 C4   LIG     1      16.954  23.657  17.521  1.00  0.00      LIG  
ATOM   7142 C5   LIG     1      17.526  22.286  17.135  1.00  0.00      LIG  
ATOM   7143 C6   LIG     1      16.433  21.211  17.048  1.00  0.00      LIG  
ATOM   7144 C7   LIG     1      16.897  19.951  16.320  1.00  0.00      LIG  
ATOM   7145 O2   LIG     1      18.103  19.442  16.883  1.00  0.00      LIG  
ATOM   7146 O3   LIG     1      15.987  20.851  18.357  1.00  0.00      LIG  
ATOM   7147 O4   LIG     1      18.174  22.416  15.871  1.00  0.00      LIG  
ATOM   7148 O5   LIG     1      16.176  23.581  18.717  1.00  0.00      LIG  
ATOM   7149 H    LIG     1      16.794  28.679  16.315  1.00  0.00      LIG  
ATOM   7150 H1   LIG     1      17.761  29.276  17.691  1.00  0.00      LIG  
ATOM   7151 H2   LIG     1      16.317  28.286  17.988  1.00  0.00      LIG  
ATOM   7152 H3   LIG     1      16.482  26.164  18.088  1.00  0.00      LIG  
ATOM   7153 H4   LIG     1      18.701  24.743  16.772  1.00  0.00      LIG  
ATOM   7154 H5   LIG     1      19.404  25.585  19.175  1.00  0.00      LIG  
ATOM   7155 H6   LIG     1      16.262  23.952  16.726  1.00  0.00      LIG  
ATOM   7156 H7   LIG     1      18.265  21.965  17.873  1.00  0.00      LIG  
ATOM   7157 H8   LIG     1      15.568  21.607  16.514  1.00  0.00      LIG  
ATOM   7158 H9   LIG     1      17.080  20.159  15.263  1.00  0.00      LIG  
ATOM   7159 H10  LIG     1      16.142  19.164  16.393  1.00  0.00      LIG  
ATOM   7160 H11  LIG     1      17.862  19.031  17.730  1.00  0.00      LIG  
ATOM   7161 H12  LIG     1      16.764  20.516  18.837  1.00  0.00      LIG  
ATOM   7162 H13  LIG     1      18.974  22.951  16.017  1.00  0.00      LIG  
ATOM   7163 H14  LIG     1      15.726  22.717  18.696  1.00  0.00      LIG  
TER
REMARK  Energy: 5.87414
REMARK  SimpleFitness: 5.87414
REMARK  FullFitness: -2513.6396
REMARK  InterFull: -22.4604
REMARK  IntraFull: 61.6848
REMARK  solvFull: -2907.97
REMARK  surfFull: 355.106
REMARK  extraFull: 0.0
REMARK  deltaGcompsolvpol: -2907.97
REMARK  deltaGcompsolvnonpol: 355.106
REMARK  deltaGprotsolvpol: -2902.69
REMARK  deltaGprotsolvnonpol: 355.646
REMARK  deltaGligsolvpol: -15.9693
REMARK  deltaGligsolvnonpol: 6.38337
REMARK  deltaGvdw: -22.4604
REMARK  deltaGelec: 0.0
REMARK  deltaG: -6.115522
REMARK  Cluster: 3
REMARK  ClusterRank: 9
ATOM   7134 C    LIG     1      17.165  28.441  17.313  1.00  0.00      LIG  
ATOM   7135 C1   LIG     1      18.035  27.221  17.234  1.00  0.00      LIG  
ATOM   7136 O    LIG     1      19.178  27.258  16.803  1.00  0.00      LIG  
ATOM   7137 N    LIG     1      17.403  26.079  17.669  1.00  0.00      LIG  
ATOM   7138 C2   LIG     1      18.027  24.760  17.634  1.00  0.00      LIG  
ATOM   7139 C3   LIG     1      18.893  24.653  18.881  1.00  0.00      LIG  
ATOM   7140 O1   LIG     1      19.337  23.598  19.307  1.00  0.00      LIG  
ATOM   7141 C4   LIG     1      16.954  23.657  17.521  1.00  0.00      LIG  
ATOM   7142 C5   LIG     1      17.526  22.286  17.135  1.00  0.00      LIG  
ATOM   7143 C6   LIG     1      16.433  21.211  17.048  1.00  0.00      LIG  
ATOM   7144 C7   LIG     1      16.897  19.951  16.320  1.00  0.00      LIG  
ATOM   7145 O2   LIG     1      18.103  19.442  16.883  1.00  0.00      LIG  
ATOM   7146 O3   LIG     1      15.987  20.851  18.357  1.00  0.00      LIG  
ATOM   7147 O4   LIG     1      18.174  22.416  15.871  1.00  0.00      LIG  
ATOM   7148 O5   LIG     1      16.176  23.581  18.717  1.00  0.00      LIG  
ATOM   7149 H    LIG     1      16.794  28.679  16.315  1.00  0.00      LIG  
ATOM   7150 H1   LIG     1      17.761  29.276  17.691  1.00  0.00      LIG  
ATOM   7151 H2   LIG     1      16.317  28.286  17.988  1.00  0.00      LIG  
ATOM   7152 H3   LIG     1      16.482  26.164  18.088  1.00  0.00      LIG  
ATOM   7153 H4   LIG     1      18.701  24.743  16.772  1.00  0.00      LIG  
ATOM   7154 H5   LIG     1      19.404  25.585  19.175  1.00  0.00      LIG  
ATOM   7155 H6   LIG     1      16.262  23.952  16.726  1.00  0.00      LIG  
ATOM   7156 H7   LIG     1      18.265  21.965  17.873  1.00  0.00      LIG  
ATOM   7157 H8   LIG     1      15.568  21.607  16.514  1.00  0.00      LIG  
ATOM   7158 H9   LIG     1      17.080  20.159  15.263  1.00  0.00      LIG  
ATOM   7159 H10  LIG     1      16.142  19.164  16.393  1.00  0.00      LIG  
ATOM   7160 H11  LIG     1      17.862  19.031  17.730  1.00  0.00      LIG  
ATOM   7161 H12  LIG     1      16.764  20.516  18.837  1.00  0.00      LIG  
ATOM   7162 H13  LIG     1      18.974  22.951  16.017  1.00  0.00      LIG  
ATOM   7163 H14  LIG     1      15.726  22.717  18.696  1.00  0.00      LIG  
TER
REMARK  Energy: 8.67251
REMARK  SimpleFitness: 8.67251
REMARK  FullFitness: -2507.1113
REMARK  InterFull: -22.5133
REMARK  IntraFull: 66.9411
REMARK  solvFull: -2906.85
REMARK  surfFull: 355.311
REMARK  extraFull: 0.0
REMARK  deltaGcompsolvpol: -2906.85
REMARK  deltaGcompsolvnonpol: 355.311
REMARK  deltaGprotsolvpol: -2902.69
REMARK  deltaGprotsolvnonpol: 355.646
REMARK  deltaGligsolvpol: -17.1318
REMARK  deltaGligsolvnonpol: 6.56927
REMARK  deltaGvdw: -22.5133
REMARK  deltaGelec: 0.0
REMARK  deltaG: -5.979037
REMARK  Cluster: 3
REMARK  ClusterRank: 10
ATOM   7134 C    LIG     1      16.215  27.968  17.607  1.00  0.00      LIG  
ATOM   7135 C1   LIG     1      16.378  26.531  17.206  1.00  0.00      LIG  
ATOM   7136 O    LIG     1      15.489  25.898  16.660  1.00  0.00      LIG  
ATOM   7137 N    LIG     1      17.620  26.017  17.495  1.00  0.00      LIG  
ATOM   7138 C2   LIG     1      17.959  24.649  17.131  1.00  0.00      LIG  
ATOM   7139 C3   LIG     1      19.475  24.646  17.063  1.00  0.00      LIG  
ATOM   7140 O1   LIG     1      20.148  23.625  17.043  1.00  0.00      LIG  
ATOM   7141 C4   LIG     1      17.281  23.615  18.066  1.00  0.00      LIG  
ATOM   7142 C5   LIG     1      16.632  22.450  17.299  1.00  0.00      LIG  
ATOM   7143 C6   LIG     1      17.608  21.429  16.700  1.00  0.00      LIG  
ATOM   7144 C7   LIG     1      16.913  20.124  16.311  1.00  0.00      LIG  
ATOM   7145 O2   LIG     1      17.879  19.161  15.895  1.00  0.00      LIG  
ATOM   7146 O3   LIG     1      18.186  21.980  15.516  1.00  0.00      LIG  
ATOM   7147 O4   LIG     1      15.728  21.793  18.186  1.00  0.00      LIG  
ATOM   7148 O5   LIG     1      18.136  23.130  19.106  1.00  0.00      LIG  
ATOM   7149 H    LIG     1      15.609  28.019  18.515  1.00  0.00      LIG  
ATOM   7150 H1   LIG     1      15.713  28.505  16.799  1.00  0.00      LIG  
ATOM   7151 H2   LIG     1      17.184  28.444  17.789  1.00  0.00      LIG  
ATOM   7152 H3   LIG     1      18.284  26.583  18.012  1.00  0.00      LIG  
ATOM   7153 H4   LIG     1      17.586  24.514  16.111  1.00  0.00      LIG  
ATOM   7154 H5   LIG     1      19.927  25.569  16.664  1.00  0.00      LIG  
ATOM   7155 H6   LIG     1      16.466  24.114  18.600  1.00  0.00      LIG  
ATOM   7156 H7   LIG     1      16.032  22.879  16.496  1.00  0.00      LIG  
ATOM   7157 H8   LIG     1      18.422  21.211  17.397  1.00  0.00      LIG  
ATOM   7158 H9   LIG     1      16.224  20.283  15.477  1.00  0.00      LIG  
ATOM   7159 H10  LIG     1      16.362  19.686  17.146  1.00  0.00      LIG  
ATOM   7160 H11  LIG     1      18.468  19.012  16.654  1.00  0.00      LIG  
ATOM   7161 H12  LIG     1      18.654  21.247  15.080  1.00  0.00      LIG  
ATOM   7162 H13  LIG     1      15.092  22.473  18.467  1.00  0.00      LIG  
ATOM   7163 H14  LIG     1      17.669  22.381  19.517  1.00  0.00      LIG  
TER
REMARK  Energy: 17.3733
REMARK  SimpleFitness: 17.3733
REMARK  FullFitness: -2501.9976
REMARK  InterFull: -22.1325
REMARK  IntraFull: 72.1988
REMARK  solvFull: -2907.76
REMARK  surfFull: 355.696
REMARK  extraFull: 0.0
REMARK  deltaGcompsolvpol: -2907.76
REMARK  deltaGcompsolvnonpol: 355.696
REMARK  deltaGprotsolvpol: -2902.69
REMARK  deltaGprotsolvnonpol: 355.646
REMARK  deltaGligsolvpol: -17.7086
REMARK  deltaGligsolvnonpol: 6.84438
REMARK  deltaGvdw: -22.1325
REMARK  deltaGelec: 0.0
REMARK  deltaG: -5.953003
REMARK  Cluster: 3
REMARK  ClusterRank: 11
ATOM   7134 C    LIG     1      16.151  26.694  17.512  1.00  0.00      LIG  
ATOM   7135 C1   LIG     1      17.097  25.692  18.101  1.00  0.00      LIG  
ATOM   7136 O    LIG     1      16.764  24.973  19.029  1.00  0.00      LIG  
ATOM   7137 N    LIG     1      18.340  25.714  17.499  1.00  0.00      LIG  
ATOM   7138 C2   LIG     1      19.471  24.824  17.779  1.00  0.00      LIG  
ATOM   7139 C3   LIG     1      19.889  24.906  19.227  1.00  0.00      LIG  
ATOM   7140 O1   LIG     1      20.664  24.107  19.733  1.00  0.00      LIG  
ATOM   7141 C4   LIG     1      19.429  23.375  17.250  1.00  0.00      LIG  
ATOM   7142 C5   LIG     1      18.359  22.445  17.864  1.00  0.00      LIG  
ATOM   7143 C6   LIG     1      17.202  22.077  16.922  1.00  0.00      LIG  
ATOM   7144 C7   LIG     1      16.135  21.244  17.623  1.00  0.00      LIG  
ATOM   7145 O2   LIG     1      16.520  19.877  17.686  1.00  0.00      LIG  
ATOM   7146 O3   LIG     1      16.582  23.261  16.441  1.00  0.00      LIG  
ATOM   7147 O4   LIG     1      19.005  21.242  18.276  1.00  0.00      LIG  
ATOM   7148 O5   LIG     1      19.359  23.387  15.823  1.00  0.00      LIG  
ATOM   7149 H    LIG     1      15.700  27.270  18.324  1.00  0.00      LIG  
ATOM   7150 H1   LIG     1      15.374  26.162  16.958  1.00  0.00      LIG  
ATOM   7151 H2   LIG     1      16.664  27.388  16.837  1.00  0.00      LIG  
ATOM   7152 H3   LIG     1      18.448  26.344  16.711  1.00  0.00      LIG  
ATOM   7153 H4   LIG     1      20.281  25.325  17.241  1.00  0.00      LIG  
ATOM   7154 H5   LIG     1      19.749  25.891  19.699  1.00  0.00      LIG  
ATOM   7155 H6   LIG     1      20.415  22.951  17.469  1.00  0.00      LIG  
ATOM   7156 H7   LIG     1      17.973  22.901  18.777  1.00  0.00      LIG  
ATOM   7157 H8   LIG     1      17.585  21.515  16.064  1.00  0.00      LIG  
ATOM   7158 H9   LIG     1      15.186  21.296  17.080  1.00  0.00      LIG  
ATOM   7159 H10  LIG     1      15.958  21.612  18.637  1.00  0.00      LIG  
ATOM   7160 H11  LIG     1      15.711  19.375  17.893  1.00  0.00      LIG  
ATOM   7161 H12  LIG     1      15.668  23.029  16.192  1.00  0.00      LIG  
ATOM   7162 H13  LIG     1      19.113  20.693  17.481  1.00  0.00      LIG  
ATOM   7163 H14  LIG     1      18.434  23.601  15.603  1.00  0.00      LIG  
TER
REMARK  Energy: 14.1215
REMARK  SimpleFitness: 14.1215
REMARK  FullFitness: -2501.6086
REMARK  InterFull: -18.6757
REMARK  IntraFull: 68.3262
REMARK  solvFull: -2906.59
REMARK  surfFull: 355.331
REMARK  extraFull: 0.0
REMARK  deltaGcompsolvpol: -2906.59
REMARK  deltaGcompsolvnonpol: 355.331
REMARK  deltaGprotsolvpol: -2902.69
REMARK  deltaGprotsolvnonpol: 355.646
REMARK  deltaGligsolvpol: -16.2134
REMARK  deltaGligsolvnonpol: 6.57822
REMARK  deltaGvdw: -18.6757
REMARK  deltaGelec: 0.0
REMARK  deltaG: -5.655249
REMARK  Cluster: 3
REMARK  ClusterRank: 12
ATOM   7134 C    LIG     1      16.079  28.089  17.567  1.00  0.00      LIG  
ATOM   7135 C1   LIG     1      16.583  26.701  17.826  1.00  0.00      LIG  
ATOM   7136 O    LIG     1      16.152  26.017  18.742  1.00  0.00      LIG  
ATOM   7137 N    LIG     1      17.716  26.438  17.084  1.00  0.00      LIG  
ATOM   7138 C2   LIG     1      18.772  25.479  17.426  1.00  0.00      LIG  
ATOM   7139 C3   LIG     1      19.616  26.201  18.464  1.00  0.00      LIG  
ATOM   7140 O1   LIG     1      20.418  25.628  19.187  1.00  0.00      LIG  
ATOM   7141 C4   LIG     1      18.392  24.047  17.875  1.00  0.00      LIG  
ATOM   7142 C5   LIG     1      17.458  23.333  16.884  1.00  0.00      LIG  
ATOM   7143 C6   LIG     1      17.539  21.790  16.891  1.00  0.00      LIG  
ATOM   7144 C7   LIG     1      16.859  21.119  18.086  1.00  0.00      LIG  
ATOM   7145 O2   LIG     1      17.546  21.388  19.300  1.00  0.00      LIG  
ATOM   7146 O3   LIG     1      16.904  21.294  15.714  1.00  0.00      LIG  
ATOM   7147 O4   LIG     1      16.110  23.710  17.150  1.00  0.00      LIG  
ATOM   7148 O5   LIG     1      19.599  23.283  17.963  1.00  0.00      LIG  
ATOM   7149 H    LIG     1      16.832  28.816  17.883  1.00  0.00      LIG  
ATOM   7150 H1   LIG     1      15.168  28.251  18.144  1.00  0.00      LIG  
ATOM   7151 H2   LIG     1      15.858  28.228  16.509  1.00  0.00      LIG  
ATOM   7152 H3   LIG     1      17.958  27.140  16.393  1.00  0.00      LIG  
ATOM   7153 H4   LIG     1      19.400  25.421  16.533  1.00  0.00      LIG  
ATOM   7154 H5   LIG     1      19.721  27.289  18.318  1.00  0.00      LIG  
ATOM   7155 H6   LIG     1      17.940  24.076  18.872  1.00  0.00      LIG  
ATOM   7156 H7   LIG     1      17.691  23.689  15.876  1.00  0.00      LIG  
ATOM   7157 H8   LIG     1      18.579  21.464  16.831  1.00  0.00      LIG  
ATOM   7158 H9   LIG     1      16.842  20.034  17.945  1.00  0.00      LIG  
ATOM   7159 H10  LIG     1      15.816  21.431  18.192  1.00  0.00      LIG  
ATOM   7160 H11  LIG     1      18.494  21.272  19.114  1.00  0.00      LIG  
ATOM   7161 H12  LIG     1      15.982  21.604  15.752  1.00  0.00      LIG  
ATOM   7162 H13  LIG     1      16.134  24.558  17.630  1.00  0.00      LIG  
ATOM   7163 H14  LIG     1      20.208  23.797  18.524  1.00  0.00      LIG  
TER
REMARK  Energy: 14.4273
REMARK  SimpleFitness: 14.4273
REMARK  FullFitness: -2500.5142
REMARK  InterFull: -25.2303
REMARK  IntraFull: 75.7082
REMARK  solvFull: -2906.04
REMARK  surfFull: 355.048
REMARK  extraFull: 0.0
REMARK  deltaGcompsolvpol: -2906.04
REMARK  deltaGcompsolvnonpol: 355.048
REMARK  deltaGprotsolvpol: -2902.69
REMARK  deltaGprotsolvnonpol: 355.646
REMARK  deltaGligsolvpol: -19.9469
REMARK  deltaGligsolvnonpol: 6.53792
REMARK  deltaGvdw: -25.2303
REMARK  deltaGelec: 0.0
REMARK  deltaG: -6.0361195
REMARK  Cluster: 3
REMARK  ClusterRank: 13
ATOM   7134 C    LIG     1      15.976  28.354  17.883  1.00  0.00      LIG  
ATOM   7135 C1   LIG     1      16.886  27.248  17.440  1.00  0.00      LIG  
ATOM   7136 O    LIG     1      17.831  27.460  16.701  1.00  0.00      LIG  
ATOM   7137 N    LIG     1      16.562  26.002  17.940  1.00  0.00      LIG  
ATOM   7138 C2   LIG     1      17.189  24.773  17.449  1.00  0.00      LIG  
ATOM   7139 C3   LIG     1      18.642  24.718  17.893  1.00  0.00      LIG  
ATOM   7140 O1   LIG     1      19.068  25.214  18.926  1.00  0.00      LIG  
ATOM   7141 C4   LIG     1      16.379  23.531  17.879  1.00  0.00      LIG  
ATOM   7142 C5   LIG     1      16.611  22.310  16.980  1.00  0.00      LIG  
ATOM   7143 C6   LIG     1      17.844  21.446  17.319  1.00  0.00      LIG  
ATOM   7144 C7   LIG     1      17.546  20.118  18.023  1.00  0.00      LIG  
ATOM   7145 O2   LIG     1      17.046  20.319  19.338  1.00  0.00      LIG  
ATOM   7146 O3   LIG     1      18.500  21.122  16.094  1.00  0.00      LIG  
ATOM   7147 O4   LIG     1      15.438  21.497  17.029  1.00  0.00      LIG  
ATOM   7148 O5   LIG     1      16.617  23.184  19.240  1.00  0.00      LIG  
ATOM   7149 H    LIG     1      15.323  28.636  17.054  1.00  0.00      LIG  
ATOM   7150 H1   LIG     1      16.586  29.213  18.177  1.00  0.00      LIG  
ATOM   7151 H2   LIG     1      15.371  28.050  18.741  1.00  0.00      LIG  
ATOM   7152 H3   LIG     1      15.759  25.924  18.555  1.00  0.00      LIG  
ATOM   7153 H4   LIG     1      17.193  24.848  16.357  1.00  0.00      LIG  
ATOM   7154 H5   LIG     1      19.289  24.068  17.283  1.00  0.00      LIG  
ATOM   7155 H6   LIG     1      15.316  23.791  17.825  1.00  0.00      LIG  
ATOM   7156 H7   LIG     1      16.678  22.671  15.950  1.00  0.00      LIG  
ATOM   7157 H8   LIG     1      18.552  22.027  17.913  1.00  0.00      LIG  
ATOM   7158 H9   LIG     1      18.457  19.517  18.098  1.00  0.00      LIG  
ATOM   7159 H10  LIG     1      16.833  19.513  17.456  1.00  0.00      LIG  
ATOM   7160 H11  LIG     1      17.753  20.762  19.838  1.00  0.00      LIG  
ATOM   7161 H12  LIG     1      17.875  20.584  15.579  1.00  0.00      LIG  
ATOM   7162 H13  LIG     1      14.707  22.042  16.683  1.00  0.00      LIG  
ATOM   7163 H14  LIG     1      16.257  22.286  19.360  1.00  0.00      LIG  
TER
REMARK  Energy: 1.30623
REMARK  SimpleFitness: 1.30623
REMARK  FullFitness: -2515.4077
REMARK  InterFull: -26.9604
REMARK  IntraFull: 58.9796
REMARK  solvFull: -2902.55
REMARK  surfFull: 355.123
REMARK  extraFull: 0.0
REMARK  deltaGcompsolvpol: -2902.55
REMARK  deltaGcompsolvnonpol: 355.123
REMARK  deltaGprotsolvpol: -2902.69
REMARK  deltaGprotsolvnonpol: 355.646
REMARK  deltaGligsolvpol: -15.9089
REMARK  deltaGligsolvnonpol: 6.48553
REMARK  deltaGvdw: -26.9604
REMARK  deltaGelec: 0.0
REMARK  deltaG: -6.221276
REMARK  Cluster: 4
REMARK  ClusterRank: 0
ATOM   7134 C    LIG     1      18.158  18.984  19.568  1.00  0.00      LIG  
ATOM   7135 C1   LIG     1      18.293  20.403  19.110  1.00  0.00      LIG  
ATOM   7136 O    LIG     1      18.906  21.240  19.755  1.00  0.00      LIG  
ATOM   7137 N    LIG     1      17.745  20.611  17.868  1.00  0.00      LIG  
ATOM   7138 C2   LIG     1      17.804  21.911  17.221  1.00  0.00      LIG  
ATOM   7139 C3   LIG     1      17.568  21.676  15.745  1.00  0.00      LIG  
ATOM   7140 O1   LIG     1      17.330  20.588  15.238  1.00  0.00      LIG  
ATOM   7141 C4   LIG     1      16.817  22.932  17.829  1.00  0.00      LIG  
ATOM   7142 C5   LIG     1      16.919  24.333  17.203  1.00  0.00      LIG  
ATOM   7143 C6   LIG     1      16.345  25.416  18.130  1.00  0.00      LIG  
ATOM   7144 C7   LIG     1      16.293  26.790  17.475  1.00  0.00      LIG  
ATOM   7145 O2   LIG     1      17.590  27.316  17.228  1.00  0.00      LIG  
ATOM   7146 O3   LIG     1      15.017  25.089  18.511  1.00  0.00      LIG  
ATOM   7147 O4   LIG     1      18.284  24.633  16.927  1.00  0.00      LIG  
ATOM   7148 O5   LIG     1      15.470  22.455  17.736  1.00  0.00      LIG  
ATOM   7149 H    LIG     1      18.039  18.977  20.654  1.00  0.00      LIG  
ATOM   7150 H1   LIG     1      19.058  18.430  19.290  1.00  0.00      LIG  
ATOM   7151 H2   LIG     1      17.282  18.507  19.118  1.00  0.00      LIG  
ATOM   7152 H3   LIG     1      17.243  19.860  17.406  1.00  0.00      LIG  
ATOM   7153 H4   LIG     1      18.830  22.274  17.332  1.00  0.00      LIG  
ATOM   7154 H5   LIG     1      17.730  22.556  15.106  1.00  0.00      LIG  
ATOM   7155 H6   LIG     1      17.042  23.021  18.896  1.00  0.00      LIG  
ATOM   7156 H7   LIG     1      16.367  24.350  16.259  1.00  0.00      LIG  
ATOM   7157 H8   LIG     1      16.960  25.471  19.032  1.00  0.00      LIG  
ATOM   7158 H9   LIG     1      15.754  27.497  18.112  1.00  0.00      LIG  
ATOM   7159 H10  LIG     1      15.751  26.725  16.531  1.00  0.00      LIG  
ATOM   7160 H11  LIG     1      17.461  28.190  16.821  1.00  0.00      LIG  
ATOM   7161 H12  LIG     1      14.574  25.917  18.770  1.00  0.00      LIG  
ATOM   7162 H13  LIG     1      18.347  25.606  16.884  1.00  0.00      LIG  
ATOM   7163 H14  LIG     1      14.898  23.229  17.900  1.00  0.00      LIG  
TER
REMARK  Energy: 1.30623
REMARK  SimpleFitness: 1.30623
REMARK  FullFitness: -2515.4077
REMARK  InterFull: -26.9604
REMARK  IntraFull: 58.9796
REMARK  solvFull: -2902.55
REMARK  surfFull: 355.123
REMARK  extraFull: 0.0
REMARK  deltaGcompsolvpol: -2902.55
REMARK  deltaGcompsolvnonpol: 355.123
REMARK  deltaGprotsolvpol: -2902.69
REMARK  deltaGprotsolvnonpol: 355.646
REMARK  deltaGligsolvpol: -15.9089
REMARK  deltaGligsolvnonpol: 6.48553
REMARK  deltaGvdw: -26.9604
REMARK  deltaGelec: 0.0
REMARK  deltaG: -6.221276
REMARK  Cluster: 4
REMARK  ClusterRank: 1
ATOM   7134 C    LIG     1      18.158  18.984  19.568  1.00  0.00      LIG  
ATOM   7135 C1   LIG     1      18.293  20.403  19.110  1.00  0.00      LIG  
ATOM   7136 O    LIG     1      18.906  21.240  19.755  1.00  0.00      LIG  
ATOM   7137 N    LIG     1      17.745  20.611  17.868  1.00  0.00      LIG  
ATOM   7138 C2   LIG     1      17.804  21.911  17.221  1.00  0.00      LIG  
ATOM   7139 C3   LIG     1      17.568  21.676  15.745  1.00  0.00      LIG  
ATOM   7140 O1   LIG     1      17.330  20.588  15.238  1.00  0.00      LIG  
ATOM   7141 C4   LIG     1      16.817  22.932  17.829  1.00  0.00      LIG  
ATOM   7142 C5   LIG     1      16.919  24.333  17.203  1.00  0.00      LIG  
ATOM   7143 C6   LIG     1      16.345  25.416  18.130  1.00  0.00      LIG  
ATOM   7144 C7   LIG     1      16.293  26.790  17.475  1.00  0.00      LIG  
ATOM   7145 O2   LIG     1      17.590  27.316  17.228  1.00  0.00      LIG  
ATOM   7146 O3   LIG     1      15.017  25.089  18.511  1.00  0.00      LIG  
ATOM   7147 O4   LIG     1      18.284  24.633  16.927  1.00  0.00      LIG  
ATOM   7148 O5   LIG     1      15.470  22.455  17.736  1.00  0.00      LIG  
ATOM   7149 H    LIG     1      18.039  18.977  20.654  1.00  0.00      LIG  
ATOM   7150 H1   LIG     1      19.058  18.430  19.290  1.00  0.00      LIG  
ATOM   7151 H2   LIG     1      17.282  18.507  19.118  1.00  0.00      LIG  
ATOM   7152 H3   LIG     1      17.243  19.860  17.406  1.00  0.00      LIG  
ATOM   7153 H4   LIG     1      18.830  22.274  17.332  1.00  0.00      LIG  
ATOM   7154 H5   LIG     1      17.730  22.556  15.106  1.00  0.00      LIG  
ATOM   7155 H6   LIG     1      17.042  23.021  18.896  1.00  0.00      LIG  
ATOM   7156 H7   LIG     1      16.367  24.350  16.259  1.00  0.00      LIG  
ATOM   7157 H8   LIG     1      16.960  25.471  19.032  1.00  0.00      LIG  
ATOM   7158 H9   LIG     1      15.754  27.497  18.112  1.00  0.00      LIG  
ATOM   7159 H10  LIG     1      15.751  26.725  16.531  1.00  0.00      LIG  
ATOM   7160 H11  LIG     1      17.461  28.190  16.821  1.00  0.00      LIG  
ATOM   7161 H12  LIG     1      14.574  25.917  18.770  1.00  0.00      LIG  
ATOM   7162 H13  LIG     1      18.347  25.606  16.884  1.00  0.00      LIG  
ATOM   7163 H14  LIG     1      14.898  23.229  17.900  1.00  0.00      LIG  
TER
REMARK  Energy: 1.44792
REMARK  SimpleFitness: 1.44792
REMARK  FullFitness: -2515.292
REMARK  InterFull: -26.9647
REMARK  IntraFull: 59.1127
REMARK  solvFull: -2902.53
REMARK  surfFull: 355.09
REMARK  extraFull: 0.0
REMARK  deltaGcompsolvpol: -2902.53
REMARK  deltaGcompsolvnonpol: 355.09
REMARK  deltaGprotsolvpol: -2902.69
REMARK  deltaGprotsolvnonpol: 355.646
REMARK  deltaGligsolvpol: -15.8823
REMARK  deltaGligsolvnonpol: 6.48758
REMARK  deltaGvdw: -26.9647
REMARK  deltaGelec: 0.0
REMARK  deltaG: -6.2254
REMARK  Cluster: 4
REMARK  ClusterRank: 2
ATOM   7134 C    LIG     1      18.015  19.065  19.572  1.00  0.00      LIG  
ATOM   7135 C1   LIG     1      18.273  20.461  19.105  1.00  0.00      LIG  
ATOM   7136 O    LIG     1      18.840  21.292  19.798  1.00  0.00      LIG  
ATOM   7137 N    LIG     1      17.752  20.690  17.856  1.00  0.00      LIG  
ATOM   7138 C2   LIG     1      17.824  21.999  17.229  1.00  0.00      LIG  
ATOM   7139 C3   LIG     1      17.612  21.783  15.747  1.00  0.00      LIG  
ATOM   7140 O1   LIG     1      17.371  20.703  15.224  1.00  0.00      LIG  
ATOM   7141 C4   LIG     1      16.825  23.009  17.834  1.00  0.00      LIG  
ATOM   7142 C5   LIG     1      16.922  24.414  17.217  1.00  0.00      LIG  
ATOM   7143 C6   LIG     1      16.332  25.486  18.144  1.00  0.00      LIG  
ATOM   7144 C7   LIG     1      16.280  26.865  17.499  1.00  0.00      LIG  
ATOM   7145 O2   LIG     1      17.577  27.399  17.267  1.00  0.00      LIG  
ATOM   7146 O3   LIG     1      15.003  25.147  18.511  1.00  0.00      LIG  
ATOM   7147 O4   LIG     1      18.289  24.724  16.957  1.00  0.00      LIG  
ATOM   7148 O5   LIG     1      15.482  22.525  17.728  1.00  0.00      LIG  
ATOM   7149 H    LIG     1      18.637  18.865  20.448  1.00  0.00      LIG  
ATOM   7150 H1   LIG     1      18.268  18.348  18.786  1.00  0.00      LIG  
ATOM   7151 H2   LIG     1      16.960  18.969  19.840  1.00  0.00      LIG  
ATOM   7152 H3   LIG     1      17.248  19.950  17.378  1.00  0.00      LIG  
ATOM   7153 H4   LIG     1      18.848  22.360  17.364  1.00  0.00      LIG  
ATOM   7154 H5   LIG     1      17.784  22.670  15.121  1.00  0.00      LIG  
ATOM   7155 H6   LIG     1      17.040  23.093  18.904  1.00  0.00      LIG  
ATOM   7156 H7   LIG     1      16.379  24.432  16.267  1.00  0.00      LIG  
ATOM   7157 H8   LIG     1      16.938  25.535  19.051  1.00  0.00      LIG  
ATOM   7158 H9   LIG     1      15.734  27.563  18.140  1.00  0.00      LIG  
ATOM   7159 H10  LIG     1      15.745  26.808  16.551  1.00  0.00      LIG  
ATOM   7160 H11  LIG     1      17.448  28.279  16.871  1.00  0.00      LIG  
ATOM   7161 H12  LIG     1      14.547  25.972  18.762  1.00  0.00      LIG  
ATOM   7162 H13  LIG     1      18.346  25.698  16.918  1.00  0.00      LIG  
ATOM   7163 H14  LIG     1      14.903  23.291  17.900  1.00  0.00      LIG  
TER
REMARK  Energy: 1.44792
REMARK  SimpleFitness: 1.44792
REMARK  FullFitness: -2515.292
REMARK  InterFull: -26.9647
REMARK  IntraFull: 59.1127
REMARK  solvFull: -2902.53
REMARK  surfFull: 355.09
REMARK  extraFull: 0.0
REMARK  deltaGcompsolvpol: -2902.53
REMARK  deltaGcompsolvnonpol: 355.09
REMARK  deltaGprotsolvpol: -2902.69
REMARK  deltaGprotsolvnonpol: 355.646
REMARK  deltaGligsolvpol: -15.8823
REMARK  deltaGligsolvnonpol: 6.48758
REMARK  deltaGvdw: -26.9647
REMARK  deltaGelec: 0.0
REMARK  deltaG: -6.2254
REMARK  Cluster: 4
REMARK  ClusterRank: 3
ATOM   7134 C    LIG     1      18.015  19.065  19.572  1.00  0.00      LIG  
ATOM   7135 C1   LIG     1      18.273  20.461  19.105  1.00  0.00      LIG  
ATOM   7136 O    LIG     1      18.840  21.292  19.798  1.00  0.00      LIG  
ATOM   7137 N    LIG     1      17.752  20.690  17.856  1.00  0.00      LIG  
ATOM   7138 C2   LIG     1      17.824  21.999  17.229  1.00  0.00      LIG  
ATOM   7139 C3   LIG     1      17.612  21.783  15.747  1.00  0.00      LIG  
ATOM   7140 O1   LIG     1      17.371  20.703  15.224  1.00  0.00      LIG  
ATOM   7141 C4   LIG     1      16.825  23.009  17.834  1.00  0.00      LIG  
ATOM   7142 C5   LIG     1      16.922  24.414  17.217  1.00  0.00      LIG  
ATOM   7143 C6   LIG     1      16.332  25.486  18.144  1.00  0.00      LIG  
ATOM   7144 C7   LIG     1      16.280  26.865  17.499  1.00  0.00      LIG  
ATOM   7145 O2   LIG     1      17.577  27.399  17.267  1.00  0.00      LIG  
ATOM   7146 O3   LIG     1      15.003  25.147  18.511  1.00  0.00      LIG  
ATOM   7147 O4   LIG     1      18.289  24.724  16.957  1.00  0.00      LIG  
ATOM   7148 O5   LIG     1      15.482  22.525  17.728  1.00  0.00      LIG  
ATOM   7149 H    LIG     1      18.637  18.865  20.448  1.00  0.00      LIG  
ATOM   7150 H1   LIG     1      18.268  18.348  18.786  1.00  0.00      LIG  
ATOM   7151 H2   LIG     1      16.960  18.969  19.840  1.00  0.00      LIG  
ATOM   7152 H3   LIG     1      17.248  19.950  17.378  1.00  0.00      LIG  
ATOM   7153 H4   LIG     1      18.848  22.360  17.364  1.00  0.00      LIG  
ATOM   7154 H5   LIG     1      17.784  22.670  15.121  1.00  0.00      LIG  
ATOM   7155 H6   LIG     1      17.040  23.093  18.904  1.00  0.00      LIG  
ATOM   7156 H7   LIG     1      16.379  24.432  16.267  1.00  0.00      LIG  
ATOM   7157 H8   LIG     1      16.938  25.535  19.051  1.00  0.00      LIG  
ATOM   7158 H9   LIG     1      15.734  27.563  18.140  1.00  0.00      LIG  
ATOM   7159 H10  LIG     1      15.745  26.808  16.551  1.00  0.00      LIG  
ATOM   7160 H11  LIG     1      17.448  28.279  16.871  1.00  0.00      LIG  
ATOM   7161 H12  LIG     1      14.547  25.972  18.762  1.00  0.00      LIG  
ATOM   7162 H13  LIG     1      18.346  25.698  16.918  1.00  0.00      LIG  
ATOM   7163 H14  LIG     1      14.903  23.291  17.900  1.00  0.00      LIG  
TER
REMARK  Energy: 6.32606
REMARK  SimpleFitness: 6.32606
REMARK  FullFitness: -2513.0322
REMARK  InterFull: -23.5081
REMARK  IntraFull: 60.4138
REMARK  solvFull: -2904.93
REMARK  surfFull: 354.992
REMARK  extraFull: 0.0
REMARK  deltaGcompsolvpol: -2904.93
REMARK  deltaGcompsolvnonpol: 354.992
REMARK  deltaGprotsolvpol: -2902.69
REMARK  deltaGprotsolvnonpol: 355.646
REMARK  deltaGligsolvpol: -16.2905
REMARK  deltaGligsolvnonpol: 6.52529
REMARK  deltaGvdw: -23.5081
REMARK  deltaGelec: 0.0
REMARK  deltaG: -6.033135
REMARK  Cluster: 4
REMARK  ClusterRank: 4
ATOM   7134 C    LIG     1      17.936  19.600  19.948  1.00  0.00      LIG  
ATOM   7135 C1   LIG     1      18.188  21.059  19.734  1.00  0.00      LIG  
ATOM   7136 O    LIG     1      18.216  21.865  20.651  1.00  0.00      LIG  
ATOM   7137 N    LIG     1      18.398  21.362  18.411  1.00  0.00      LIG  
ATOM   7138 C2   LIG     1      18.579  22.734  17.966  1.00  0.00      LIG  
ATOM   7139 C3   LIG     1      19.356  22.672  16.670  1.00  0.00      LIG  
ATOM   7140 O1   LIG     1      19.448  21.677  15.964  1.00  0.00      LIG  
ATOM   7141 C4   LIG     1      17.241  23.484  17.816  1.00  0.00      LIG  
ATOM   7142 C5   LIG     1      17.440  24.969  17.493  1.00  0.00      LIG  
ATOM   7143 C6   LIG     1      16.097  25.709  17.475  1.00  0.00      LIG  
ATOM   7144 C7   LIG     1      16.202  27.222  17.645  1.00  0.00      LIG  
ATOM   7145 O2   LIG     1      17.283  27.769  16.900  1.00  0.00      LIG  
ATOM   7146 O3   LIG     1      15.452  25.452  16.237  1.00  0.00      LIG  
ATOM   7147 O4   LIG     1      18.299  25.532  18.477  1.00  0.00      LIG  
ATOM   7148 O5   LIG     1      16.416  22.860  16.827  1.00  0.00      LIG  
ATOM   7149 H    LIG     1      17.671  19.440  20.997  1.00  0.00      LIG  
ATOM   7150 H1   LIG     1      18.839  19.031  19.711  1.00  0.00      LIG  
ATOM   7151 H2   LIG     1      17.106  19.267  19.317  1.00  0.00      LIG  
ATOM   7152 H3   LIG     1      18.312  20.632  17.711  1.00  0.00      LIG  
ATOM   7153 H4   LIG     1      19.214  23.234  18.703  1.00  0.00      LIG  
ATOM   7154 H5   LIG     1      19.783  23.631  16.336  1.00  0.00      LIG  
ATOM   7155 H6   LIG     1      16.704  23.408  18.766  1.00  0.00      LIG  
ATOM   7156 H7   LIG     1      17.924  25.067  16.516  1.00  0.00      LIG  
ATOM   7157 H8   LIG     1      15.448  25.318  18.263  1.00  0.00      LIG  
ATOM   7158 H9   LIG     1      16.361  27.464  18.689  1.00  0.00      LIG  
ATOM   7159 H10  LIG     1      15.290  27.731  17.328  1.00  0.00      LIG  
ATOM   7160 H11  LIG     1      17.008  27.763  15.966  1.00  0.00      LIG  
ATOM   7161 H12  LIG     1      14.534  25.764  16.329  1.00  0.00      LIG  
ATOM   7162 H13  LIG     1      18.373  26.479  18.260  1.00  0.00      LIG  
ATOM   7163 H14  LIG     1      15.711  23.494  16.598  1.00  0.00      LIG  
TER
REMARK  Energy: 6.32606
REMARK  SimpleFitness: 6.32606
REMARK  FullFitness: -2513.0322
REMARK  InterFull: -23.5081
REMARK  IntraFull: 60.4138
REMARK  solvFull: -2904.93
REMARK  surfFull: 354.992
REMARK  extraFull: 0.0
REMARK  deltaGcompsolvpol: -2904.93
REMARK  deltaGcompsolvnonpol: 354.992
REMARK  deltaGprotsolvpol: -2902.69
REMARK  deltaGprotsolvnonpol: 355.646
REMARK  deltaGligsolvpol: -16.2905
REMARK  deltaGligsolvnonpol: 6.52529
REMARK  deltaGvdw: -23.5081
REMARK  deltaGelec: 0.0
REMARK  deltaG: -6.033135
REMARK  Cluster: 4
REMARK  ClusterRank: 5
ATOM   7134 C    LIG     1      17.936  19.600  19.948  1.00  0.00      LIG  
ATOM   7135 C1   LIG     1      18.188  21.059  19.734  1.00  0.00      LIG  
ATOM   7136 O    LIG     1      18.216  21.865  20.651  1.00  0.00      LIG  
ATOM   7137 N    LIG     1      18.398  21.362  18.411  1.00  0.00      LIG  
ATOM   7138 C2   LIG     1      18.579  22.734  17.966  1.00  0.00      LIG  
ATOM   7139 C3   LIG     1      19.356  22.672  16.670  1.00  0.00      LIG  
ATOM   7140 O1   LIG     1      19.448  21.677  15.964  1.00  0.00      LIG  
ATOM   7141 C4   LIG     1      17.241  23.484  17.816  1.00  0.00      LIG  
ATOM   7142 C5   LIG     1      17.440  24.969  17.493  1.00  0.00      LIG  
ATOM   7143 C6   LIG     1      16.097  25.709  17.475  1.00  0.00      LIG  
ATOM   7144 C7   LIG     1      16.202  27.222  17.645  1.00  0.00      LIG  
ATOM   7145 O2   LIG     1      17.283  27.769  16.900  1.00  0.00      LIG  
ATOM   7146 O3   LIG     1      15.452  25.452  16.237  1.00  0.00      LIG  
ATOM   7147 O4   LIG     1      18.299  25.532  18.477  1.00  0.00      LIG  
ATOM   7148 O5   LIG     1      16.416  22.860  16.827  1.00  0.00      LIG  
ATOM   7149 H    LIG     1      17.671  19.440  20.997  1.00  0.00      LIG  
ATOM   7150 H1   LIG     1      18.839  19.031  19.711  1.00  0.00      LIG  
ATOM   7151 H2   LIG     1      17.106  19.267  19.317  1.00  0.00      LIG  
ATOM   7152 H3   LIG     1      18.312  20.632  17.711  1.00  0.00      LIG  
ATOM   7153 H4   LIG     1      19.214  23.234  18.703  1.00  0.00      LIG  
ATOM   7154 H5   LIG     1      19.783  23.631  16.336  1.00  0.00      LIG  
ATOM   7155 H6   LIG     1      16.704  23.408  18.766  1.00  0.00      LIG  
ATOM   7156 H7   LIG     1      17.924  25.067  16.516  1.00  0.00      LIG  
ATOM   7157 H8   LIG     1      15.448  25.318  18.263  1.00  0.00      LIG  
ATOM   7158 H9   LIG     1      16.361  27.464  18.689  1.00  0.00      LIG  
ATOM   7159 H10  LIG     1      15.290  27.731  17.328  1.00  0.00      LIG  
ATOM   7160 H11  LIG     1      17.008  27.763  15.966  1.00  0.00      LIG  
ATOM   7161 H12  LIG     1      14.534  25.764  16.329  1.00  0.00      LIG  
ATOM   7162 H13  LIG     1      18.373  26.479  18.260  1.00  0.00      LIG  
ATOM   7163 H14  LIG     1      15.711  23.494  16.598  1.00  0.00      LIG  
TER
REMARK  Energy: 6.32606
REMARK  SimpleFitness: 6.32606
REMARK  FullFitness: -2513.0322
REMARK  InterFull: -23.5081
REMARK  IntraFull: 60.4138
REMARK  solvFull: -2904.93
REMARK  surfFull: 354.992
REMARK  extraFull: 0.0
REMARK  deltaGcompsolvpol: -2904.93
REMARK  deltaGcompsolvnonpol: 354.992
REMARK  deltaGprotsolvpol: -2902.69
REMARK  deltaGprotsolvnonpol: 355.646
REMARK  deltaGligsolvpol: -16.2905
REMARK  deltaGligsolvnonpol: 6.52529
REMARK  deltaGvdw: -23.5081
REMARK  deltaGelec: 0.0
REMARK  deltaG: -6.033135
REMARK  Cluster: 4
REMARK  ClusterRank: 6
ATOM   7134 C    LIG     1      17.936  19.600  19.948  1.00  0.00      LIG  
ATOM   7135 C1   LIG     1      18.188  21.059  19.734  1.00  0.00      LIG  
ATOM   7136 O    LIG     1      18.216  21.865  20.651  1.00  0.00      LIG  
ATOM   7137 N    LIG     1      18.398  21.362  18.411  1.00  0.00      LIG  
ATOM   7138 C2   LIG     1      18.579  22.734  17.966  1.00  0.00      LIG  
ATOM   7139 C3   LIG     1      19.356  22.672  16.670  1.00  0.00      LIG  
ATOM   7140 O1   LIG     1      19.448  21.677  15.964  1.00  0.00      LIG  
ATOM   7141 C4   LIG     1      17.241  23.484  17.816  1.00  0.00      LIG  
ATOM   7142 C5   LIG     1      17.440  24.969  17.493  1.00  0.00      LIG  
ATOM   7143 C6   LIG     1      16.097  25.709  17.475  1.00  0.00      LIG  
ATOM   7144 C7   LIG     1      16.202  27.222  17.645  1.00  0.00      LIG  
ATOM   7145 O2   LIG     1      17.283  27.769  16.900  1.00  0.00      LIG  
ATOM   7146 O3   LIG     1      15.452  25.452  16.237  1.00  0.00      LIG  
ATOM   7147 O4   LIG     1      18.299  25.532  18.477  1.00  0.00      LIG  
ATOM   7148 O5   LIG     1      16.416  22.860  16.827  1.00  0.00      LIG  
ATOM   7149 H    LIG     1      17.671  19.440  20.997  1.00  0.00      LIG  
ATOM   7150 H1   LIG     1      18.839  19.031  19.711  1.00  0.00      LIG  
ATOM   7151 H2   LIG     1      17.106  19.267  19.317  1.00  0.00      LIG  
ATOM   7152 H3   LIG     1      18.312  20.632  17.711  1.00  0.00      LIG  
ATOM   7153 H4   LIG     1      19.214  23.234  18.703  1.00  0.00      LIG  
ATOM   7154 H5   LIG     1      19.783  23.631  16.336  1.00  0.00      LIG  
ATOM   7155 H6   LIG     1      16.704  23.408  18.766  1.00  0.00      LIG  
ATOM   7156 H7   LIG     1      17.924  25.067  16.516  1.00  0.00      LIG  
ATOM   7157 H8   LIG     1      15.448  25.318  18.263  1.00  0.00      LIG  
ATOM   7158 H9   LIG     1      16.361  27.464  18.689  1.00  0.00      LIG  
ATOM   7159 H10  LIG     1      15.290  27.731  17.328  1.00  0.00      LIG  
ATOM   7160 H11  LIG     1      17.008  27.763  15.966  1.00  0.00      LIG  
ATOM   7161 H12  LIG     1      14.534  25.764  16.329  1.00  0.00      LIG  
ATOM   7162 H13  LIG     1      18.373  26.479  18.260  1.00  0.00      LIG  
ATOM   7163 H14  LIG     1      15.711  23.494  16.598  1.00  0.00      LIG  
TER
REMARK  Energy: 6.32606
REMARK  SimpleFitness: 6.32606
REMARK  FullFitness: -2513.0322
REMARK  InterFull: -23.5081
REMARK  IntraFull: 60.4138
REMARK  solvFull: -2904.93
REMARK  surfFull: 354.992
REMARK  extraFull: 0.0
REMARK  deltaGcompsolvpol: -2904.93
REMARK  deltaGcompsolvnonpol: 354.992
REMARK  deltaGprotsolvpol: -2902.69
REMARK  deltaGprotsolvnonpol: 355.646
REMARK  deltaGligsolvpol: -16.2905
REMARK  deltaGligsolvnonpol: 6.52529
REMARK  deltaGvdw: -23.5081
REMARK  deltaGelec: 0.0
REMARK  deltaG: -6.033135
REMARK  Cluster: 4
REMARK  ClusterRank: 7
ATOM   7134 C    LIG     1      17.936  19.600  19.948  1.00  0.00      LIG  
ATOM   7135 C1   LIG     1      18.188  21.059  19.734  1.00  0.00      LIG  
ATOM   7136 O    LIG     1      18.216  21.865  20.651  1.00  0.00      LIG  
ATOM   7137 N    LIG     1      18.398  21.362  18.411  1.00  0.00      LIG  
ATOM   7138 C2   LIG     1      18.579  22.734  17.966  1.00  0.00      LIG  
ATOM   7139 C3   LIG     1      19.356  22.672  16.670  1.00  0.00      LIG  
ATOM   7140 O1   LIG     1      19.448  21.677  15.964  1.00  0.00      LIG  
ATOM   7141 C4   LIG     1      17.241  23.484  17.816  1.00  0.00      LIG  
ATOM   7142 C5   LIG     1      17.440  24.969  17.493  1.00  0.00      LIG  
ATOM   7143 C6   LIG     1      16.097  25.709  17.475  1.00  0.00      LIG  
ATOM   7144 C7   LIG     1      16.202  27.222  17.645  1.00  0.00      LIG  
ATOM   7145 O2   LIG     1      17.283  27.769  16.900  1.00  0.00      LIG  
ATOM   7146 O3   LIG     1      15.452  25.452  16.237  1.00  0.00      LIG  
ATOM   7147 O4   LIG     1      18.299  25.532  18.477  1.00  0.00      LIG  
ATOM   7148 O5   LIG     1      16.416  22.860  16.827  1.00  0.00      LIG  
ATOM   7149 H    LIG     1      17.671  19.440  20.997  1.00  0.00      LIG  
ATOM   7150 H1   LIG     1      18.839  19.031  19.711  1.00  0.00      LIG  
ATOM   7151 H2   LIG     1      17.106  19.267  19.317  1.00  0.00      LIG  
ATOM   7152 H3   LIG     1      18.312  20.632  17.711  1.00  0.00      LIG  
ATOM   7153 H4   LIG     1      19.214  23.234  18.703  1.00  0.00      LIG  
ATOM   7154 H5   LIG     1      19.783  23.631  16.336  1.00  0.00      LIG  
ATOM   7155 H6   LIG     1      16.704  23.408  18.766  1.00  0.00      LIG  
ATOM   7156 H7   LIG     1      17.924  25.067  16.516  1.00  0.00      LIG  
ATOM   7157 H8   LIG     1      15.448  25.318  18.263  1.00  0.00      LIG  
ATOM   7158 H9   LIG     1      16.361  27.464  18.689  1.00  0.00      LIG  
ATOM   7159 H10  LIG     1      15.290  27.731  17.328  1.00  0.00      LIG  
ATOM   7160 H11  LIG     1      17.008  27.763  15.966  1.00  0.00      LIG  
ATOM   7161 H12  LIG     1      14.534  25.764  16.329  1.00  0.00      LIG  
ATOM   7162 H13  LIG     1      18.373  26.479  18.260  1.00  0.00      LIG  
ATOM   7163 H14  LIG     1      15.711  23.494  16.598  1.00  0.00      LIG  
TER
REMARK  Energy: 4.14134
REMARK  SimpleFitness: 4.14134
REMARK  FullFitness: -2514.7964
REMARK  InterFull: -24.219
REMARK  IntraFull: 60.6097
REMARK  solvFull: -2905.91
REMARK  surfFull: 354.723
REMARK  extraFull: 0.0
REMARK  deltaGcompsolvpol: -2905.91
REMARK  deltaGcompsolvnonpol: 354.723
REMARK  deltaGprotsolvpol: -2902.69
REMARK  deltaGprotsolvnonpol: 355.646
REMARK  deltaGligsolvpol: -16.3952
REMARK  deltaGligsolvnonpol: 6.65709
REMARK  deltaGvdw: -24.219
REMARK  deltaGelec: 0.0
REMARK  deltaG: -6.19187
REMARK  Cluster: 5
REMARK  ClusterRank: 0
ATOM   7134 C    LIG     1       9.520   5.595  31.577  1.00  0.00      LIG  
ATOM   7135 C1   LIG     1       8.780   6.119  32.771  1.00  0.00      LIG  
ATOM   7136 O    LIG     1       9.080   5.793  33.909  1.00  0.00      LIG  
ATOM   7137 N    LIG     1       7.814   7.046  32.442  1.00  0.00      LIG  
ATOM   7138 C2   LIG     1       7.072   7.786  33.455  1.00  0.00      LIG  
ATOM   7139 C3   LIG     1       7.731   9.137  33.580  1.00  0.00      LIG  
ATOM   7140 O1   LIG     1       7.175  10.087  34.114  1.00  0.00      LIG  
ATOM   7141 C4   LIG     1       5.567   7.910  33.161  1.00  0.00      LIG  
ATOM   7142 C5   LIG     1       5.208   8.267  31.711  1.00  0.00      LIG  
ATOM   7143 C6   LIG     1       3.693   8.431  31.535  1.00  0.00      LIG  
ATOM   7144 C7   LIG     1       3.176   9.731  32.151  1.00  0.00      LIG  
ATOM   7145 O2   LIG     1       1.756   9.705  32.214  1.00  0.00      LIG  
ATOM   7146 O3   LIG     1       3.393   8.446  30.137  1.00  0.00      LIG  
ATOM   7147 O4   LIG     1       5.861   9.471  31.307  1.00  0.00      LIG  
ATOM   7148 O5   LIG     1       4.925   6.680  33.493  1.00  0.00      LIG  
ATOM   7149 H    LIG     1      10.511   6.056  31.543  1.00  0.00      LIG  
ATOM   7150 H1   LIG     1       8.988   5.818  30.646  1.00  0.00      LIG  
ATOM   7151 H2   LIG     1       9.618   4.510  31.672  1.00  0.00      LIG  
ATOM   7152 H3   LIG     1       7.717   7.317  31.469  1.00  0.00      LIG  
ATOM   7153 H4   LIG     1       7.219   7.284  34.417  1.00  0.00      LIG  
ATOM   7154 H5   LIG     1       8.828   9.143  33.482  1.00  0.00      LIG  
ATOM   7155 H6   LIG     1       5.149   8.665  33.830  1.00  0.00      LIG  
ATOM   7156 H7   LIG     1       5.552   7.475  31.038  1.00  0.00      LIG  
ATOM   7157 H8   LIG     1       3.157   7.574  31.953  1.00  0.00      LIG  
ATOM   7158 H9   LIG     1       3.463  10.598  31.549  1.00  0.00      LIG  
ATOM   7159 H10  LIG     1       3.546   9.870  33.169  1.00  0.00      LIG  
ATOM   7160 H11  LIG     1       1.451   9.438  31.330  1.00  0.00      LIG  
ATOM   7161 H12  LIG     1       4.021   9.070  29.730  1.00  0.00      LIG  
ATOM   7162 H13  LIG     1       5.750  10.114  32.029  1.00  0.00      LIG  
ATOM   7163 H14  LIG     1       5.313   6.367  34.332  1.00  0.00      LIG  
TER
REMARK  Energy: 4.14134
REMARK  SimpleFitness: 4.14134
REMARK  FullFitness: -2514.7964
REMARK  InterFull: -24.219
REMARK  IntraFull: 60.6097
REMARK  solvFull: -2905.91
REMARK  surfFull: 354.723
REMARK  extraFull: 0.0
REMARK  deltaGcompsolvpol: -2905.91
REMARK  deltaGcompsolvnonpol: 354.723
REMARK  deltaGprotsolvpol: -2902.69
REMARK  deltaGprotsolvnonpol: 355.646
REMARK  deltaGligsolvpol: -16.3952
REMARK  deltaGligsolvnonpol: 6.65709
REMARK  deltaGvdw: -24.219
REMARK  deltaGelec: 0.0
REMARK  deltaG: -6.19187
REMARK  Cluster: 5
REMARK  ClusterRank: 1
ATOM   7134 C    LIG     1       9.520   5.595  31.577  1.00  0.00      LIG  
ATOM   7135 C1   LIG     1       8.780   6.119  32.771  1.00  0.00      LIG  
ATOM   7136 O    LIG     1       9.080   5.793  33.909  1.00  0.00      LIG  
ATOM   7137 N    LIG     1       7.814   7.046  32.442  1.00  0.00      LIG  
ATOM   7138 C2   LIG     1       7.072   7.786  33.455  1.00  0.00      LIG  
ATOM   7139 C3   LIG     1       7.731   9.137  33.580  1.00  0.00      LIG  
ATOM   7140 O1   LIG     1       7.175  10.087  34.114  1.00  0.00      LIG  
ATOM   7141 C4   LIG     1       5.567   7.910  33.161  1.00  0.00      LIG  
ATOM   7142 C5   LIG     1       5.208   8.267  31.711  1.00  0.00      LIG  
ATOM   7143 C6   LIG     1       3.693   8.431  31.535  1.00  0.00      LIG  
ATOM   7144 C7   LIG     1       3.176   9.731  32.151  1.00  0.00      LIG  
ATOM   7145 O2   LIG     1       1.756   9.705  32.214  1.00  0.00      LIG  
ATOM   7146 O3   LIG     1       3.393   8.446  30.137  1.00  0.00      LIG  
ATOM   7147 O4   LIG     1       5.861   9.471  31.307  1.00  0.00      LIG  
ATOM   7148 O5   LIG     1       4.925   6.680  33.493  1.00  0.00      LIG  
ATOM   7149 H    LIG     1      10.511   6.056  31.543  1.00  0.00      LIG  
ATOM   7150 H1   LIG     1       8.988   5.818  30.646  1.00  0.00      LIG  
ATOM   7151 H2   LIG     1       9.618   4.510  31.672  1.00  0.00      LIG  
ATOM   7152 H3   LIG     1       7.717   7.317  31.469  1.00  0.00      LIG  
ATOM   7153 H4   LIG     1       7.219   7.284  34.417  1.00  0.00      LIG  
ATOM   7154 H5   LIG     1       8.828   9.143  33.482  1.00  0.00      LIG  
ATOM   7155 H6   LIG     1       5.149   8.665  33.830  1.00  0.00      LIG  
ATOM   7156 H7   LIG     1       5.552   7.475  31.038  1.00  0.00      LIG  
ATOM   7157 H8   LIG     1       3.157   7.574  31.953  1.00  0.00      LIG  
ATOM   7158 H9   LIG     1       3.463  10.598  31.549  1.00  0.00      LIG  
ATOM   7159 H10  LIG     1       3.546   9.870  33.169  1.00  0.00      LIG  
ATOM   7160 H11  LIG     1       1.451   9.438  31.330  1.00  0.00      LIG  
ATOM   7161 H12  LIG     1       4.021   9.070  29.730  1.00  0.00      LIG  
ATOM   7162 H13  LIG     1       5.750  10.114  32.029  1.00  0.00      LIG  
ATOM   7163 H14  LIG     1       5.313   6.367  34.332  1.00  0.00      LIG  
TER
REMARK  Energy: 4.14271
REMARK  SimpleFitness: 4.14271
REMARK  FullFitness: -2514.795
REMARK  InterFull: -24.2226
REMARK  IntraFull: 60.6267
REMARK  solvFull: -2905.93
REMARK  surfFull: 354.731
REMARK  extraFull: 0.0
REMARK  deltaGcompsolvpol: -2905.93
REMARK  deltaGcompsolvnonpol: 354.731
REMARK  deltaGprotsolvpol: -2902.69
REMARK  deltaGprotsolvnonpol: 355.646
REMARK  deltaGligsolvpol: -16.4097
REMARK  deltaGligsolvnonpol: 6.65685
REMARK  deltaGvdw: -24.2226
REMARK  deltaGelec: 0.0
REMARK  deltaG: -6.1917696
REMARK  Cluster: 5
REMARK  ClusterRank: 2
ATOM   7134 C    LIG     1       9.539   5.590  31.578  1.00  0.00      LIG  
ATOM   7135 C1   LIG     1       8.790   6.110  32.769  1.00  0.00      LIG  
ATOM   7136 O    LIG     1       9.088   5.787  33.908  1.00  0.00      LIG  
ATOM   7137 N    LIG     1       7.821   7.033  32.437  1.00  0.00      LIG  
ATOM   7138 C2   LIG     1       7.078   7.772  33.450  1.00  0.00      LIG  
ATOM   7139 C3   LIG     1       7.741   9.121  33.580  1.00  0.00      LIG  
ATOM   7140 O1   LIG     1       7.191  10.070  34.120  1.00  0.00      LIG  
ATOM   7141 C4   LIG     1       5.575   7.901  33.151  1.00  0.00      LIG  
ATOM   7142 C5   LIG     1       5.223   8.263  31.701  1.00  0.00      LIG  
ATOM   7143 C6   LIG     1       3.709   8.427  31.518  1.00  0.00      LIG  
ATOM   7144 C7   LIG     1       3.188   9.724  32.136  1.00  0.00      LIG  
ATOM   7145 O2   LIG     1       1.766   9.697  32.189  1.00  0.00      LIG  
ATOM   7146 O3   LIG     1       3.417   8.449  30.118  1.00  0.00      LIG  
ATOM   7147 O4   LIG     1       5.879   9.467  31.301  1.00  0.00      LIG  
ATOM   7148 O5   LIG     1       4.930   6.671  33.476  1.00  0.00      LIG  
ATOM   7149 H    LIG     1      10.530   6.050  31.555  1.00  0.00      LIG  
ATOM   7150 H1   LIG     1       9.015   5.819  30.644  1.00  0.00      LIG  
ATOM   7151 H2   LIG     1       9.634   4.505  31.669  1.00  0.00      LIG  
ATOM   7152 H3   LIG     1       7.720   7.300  31.463  1.00  0.00      LIG  
ATOM   7153 H4   LIG     1       7.220   7.268  34.412  1.00  0.00      LIG  
ATOM   7154 H5   LIG     1       8.839   9.122  33.480  1.00  0.00      LIG  
ATOM   7155 H6   LIG     1       5.154   8.654  33.821  1.00  0.00      LIG  
ATOM   7156 H7   LIG     1       5.569   7.474  31.028  1.00  0.00      LIG  
ATOM   7157 H8   LIG     1       3.171   7.568  31.929  1.00  0.00      LIG  
ATOM   7158 H9   LIG     1       3.478  10.595  31.541  1.00  0.00      LIG  
ATOM   7159 H10  LIG     1       3.549   9.859  33.158  1.00  0.00      LIG  
ATOM   7160 H11  LIG     1       1.469   9.438  31.299  1.00  0.00      LIG  
ATOM   7161 H12  LIG     1       4.035   9.089  29.721  1.00  0.00      LIG  
ATOM   7162 H13  LIG     1       5.755  10.114  32.018  1.00  0.00      LIG  
ATOM   7163 H14  LIG     1       5.308   6.360  34.321  1.00  0.00      LIG  
TER
REMARK  Energy: 4.14271
REMARK  SimpleFitness: 4.14271
REMARK  FullFitness: -2514.795
REMARK  InterFull: -24.2226
REMARK  IntraFull: 60.6267
REMARK  solvFull: -2905.93
REMARK  surfFull: 354.731
REMARK  extraFull: 0.0
REMARK  deltaGcompsolvpol: -2905.93
REMARK  deltaGcompsolvnonpol: 354.731
REMARK  deltaGprotsolvpol: -2902.69
REMARK  deltaGprotsolvnonpol: 355.646
REMARK  deltaGligsolvpol: -16.4097
REMARK  deltaGligsolvnonpol: 6.65685
REMARK  deltaGvdw: -24.2226
REMARK  deltaGelec: 0.0
REMARK  deltaG: -6.1917696
REMARK  Cluster: 5
REMARK  ClusterRank: 3
ATOM   7134 C    LIG     1       9.539   5.590  31.578  1.00  0.00      LIG  
ATOM   7135 C1   LIG     1       8.790   6.110  32.769  1.00  0.00      LIG  
ATOM   7136 O    LIG     1       9.088   5.787  33.908  1.00  0.00      LIG  
ATOM   7137 N    LIG     1       7.821   7.033  32.437  1.00  0.00      LIG  
ATOM   7138 C2   LIG     1       7.078   7.772  33.450  1.00  0.00      LIG  
ATOM   7139 C3   LIG     1       7.741   9.121  33.580  1.00  0.00      LIG  
ATOM   7140 O1   LIG     1       7.191  10.070  34.120  1.00  0.00      LIG  
ATOM   7141 C4   LIG     1       5.575   7.901  33.151  1.00  0.00      LIG  
ATOM   7142 C5   LIG     1       5.223   8.263  31.701  1.00  0.00      LIG  
ATOM   7143 C6   LIG     1       3.709   8.427  31.518  1.00  0.00      LIG  
ATOM   7144 C7   LIG     1       3.188   9.724  32.136  1.00  0.00      LIG  
ATOM   7145 O2   LIG     1       1.766   9.697  32.189  1.00  0.00      LIG  
ATOM   7146 O3   LIG     1       3.417   8.449  30.118  1.00  0.00      LIG  
ATOM   7147 O4   LIG     1       5.879   9.467  31.301  1.00  0.00      LIG  
ATOM   7148 O5   LIG     1       4.930   6.671  33.476  1.00  0.00      LIG  
ATOM   7149 H    LIG     1      10.530   6.050  31.555  1.00  0.00      LIG  
ATOM   7150 H1   LIG     1       9.015   5.819  30.644  1.00  0.00      LIG  
ATOM   7151 H2   LIG     1       9.634   4.505  31.669  1.00  0.00      LIG  
ATOM   7152 H3   LIG     1       7.720   7.300  31.463  1.00  0.00      LIG  
ATOM   7153 H4   LIG     1       7.220   7.268  34.412  1.00  0.00      LIG  
ATOM   7154 H5   LIG     1       8.839   9.122  33.480  1.00  0.00      LIG  
ATOM   7155 H6   LIG     1       5.154   8.654  33.821  1.00  0.00      LIG  
ATOM   7156 H7   LIG     1       5.569   7.474  31.028  1.00  0.00      LIG  
ATOM   7157 H8   LIG     1       3.171   7.568  31.929  1.00  0.00      LIG  
ATOM   7158 H9   LIG     1       3.478  10.595  31.541  1.00  0.00      LIG  
ATOM   7159 H10  LIG     1       3.549   9.859  33.158  1.00  0.00      LIG  
ATOM   7160 H11  LIG     1       1.469   9.438  31.299  1.00  0.00      LIG  
ATOM   7161 H12  LIG     1       4.035   9.089  29.721  1.00  0.00      LIG  
ATOM   7162 H13  LIG     1       5.755  10.114  32.018  1.00  0.00      LIG  
ATOM   7163 H14  LIG     1       5.308   6.360  34.321  1.00  0.00      LIG  
TER
REMARK  Energy: 4.14271
REMARK  SimpleFitness: 4.14271
REMARK  FullFitness: -2514.795
REMARK  InterFull: -24.2226
REMARK  IntraFull: 60.6267
REMARK  solvFull: -2905.93
REMARK  surfFull: 354.731
REMARK  extraFull: 0.0
REMARK  deltaGcompsolvpol: -2905.93
REMARK  deltaGcompsolvnonpol: 354.731
REMARK  deltaGprotsolvpol: -2902.69
REMARK  deltaGprotsolvnonpol: 355.646
REMARK  deltaGligsolvpol: -16.4097
REMARK  deltaGligsolvnonpol: 6.65685
REMARK  deltaGvdw: -24.2226
REMARK  deltaGelec: 0.0
REMARK  deltaG: -6.1917696
REMARK  Cluster: 5
REMARK  ClusterRank: 4
ATOM   7134 C    LIG     1       9.539   5.590  31.578  1.00  0.00      LIG  
ATOM   7135 C1   LIG     1       8.790   6.110  32.769  1.00  0.00      LIG  
ATOM   7136 O    LIG     1       9.088   5.787  33.908  1.00  0.00      LIG  
ATOM   7137 N    LIG     1       7.821   7.033  32.437  1.00  0.00      LIG  
ATOM   7138 C2   LIG     1       7.078   7.772  33.450  1.00  0.00      LIG  
ATOM   7139 C3   LIG     1       7.741   9.121  33.580  1.00  0.00      LIG  
ATOM   7140 O1   LIG     1       7.191  10.070  34.120  1.00  0.00      LIG  
ATOM   7141 C4   LIG     1       5.575   7.901  33.151  1.00  0.00      LIG  
ATOM   7142 C5   LIG     1       5.223   8.263  31.701  1.00  0.00      LIG  
ATOM   7143 C6   LIG     1       3.709   8.427  31.518  1.00  0.00      LIG  
ATOM   7144 C7   LIG     1       3.188   9.724  32.136  1.00  0.00      LIG  
ATOM   7145 O2   LIG     1       1.766   9.697  32.189  1.00  0.00      LIG  
ATOM   7146 O3   LIG     1       3.417   8.449  30.118  1.00  0.00      LIG  
ATOM   7147 O4   LIG     1       5.879   9.467  31.301  1.00  0.00      LIG  
ATOM   7148 O5   LIG     1       4.930   6.671  33.476  1.00  0.00      LIG  
ATOM   7149 H    LIG     1      10.530   6.050  31.555  1.00  0.00      LIG  
ATOM   7150 H1   LIG     1       9.015   5.819  30.644  1.00  0.00      LIG  
ATOM   7151 H2   LIG     1       9.634   4.505  31.669  1.00  0.00      LIG  
ATOM   7152 H3   LIG     1       7.720   7.300  31.463  1.00  0.00      LIG  
ATOM   7153 H4   LIG     1       7.220   7.268  34.412  1.00  0.00      LIG  
ATOM   7154 H5   LIG     1       8.839   9.122  33.480  1.00  0.00      LIG  
ATOM   7155 H6   LIG     1       5.154   8.654  33.821  1.00  0.00      LIG  
ATOM   7156 H7   LIG     1       5.569   7.474  31.028  1.00  0.00      LIG  
ATOM   7157 H8   LIG     1       3.171   7.568  31.929  1.00  0.00      LIG  
ATOM   7158 H9   LIG     1       3.478  10.595  31.541  1.00  0.00      LIG  
ATOM   7159 H10  LIG     1       3.549   9.859  33.158  1.00  0.00      LIG  
ATOM   7160 H11  LIG     1       1.469   9.438  31.299  1.00  0.00      LIG  
ATOM   7161 H12  LIG     1       4.035   9.089  29.721  1.00  0.00      LIG  
ATOM   7162 H13  LIG     1       5.755  10.114  32.018  1.00  0.00      LIG  
ATOM   7163 H14  LIG     1       5.308   6.360  34.321  1.00  0.00      LIG  
TER
REMARK  Energy: 4.13862
REMARK  SimpleFitness: 4.13862
REMARK  FullFitness: -2514.7815
REMARK  InterFull: -24.1391
REMARK  IntraFull: 60.6086
REMARK  solvFull: -2905.98
REMARK  surfFull: 354.729
REMARK  extraFull: 0.0
REMARK  deltaGcompsolvpol: -2905.98
REMARK  deltaGcompsolvnonpol: 354.729
REMARK  deltaGprotsolvpol: -2902.69
REMARK  deltaGprotsolvnonpol: 355.646
REMARK  deltaGligsolvpol: -16.4168
REMARK  deltaGligsolvnonpol: 6.65694
REMARK  deltaGvdw: -24.1391
REMARK  deltaGelec: 0.0
REMARK  deltaG: -6.186695
REMARK  Cluster: 5
REMARK  ClusterRank: 5
ATOM   7134 C    LIG     1       9.531   5.600  31.573  1.00  0.00      LIG  
ATOM   7135 C1   LIG     1       8.786   6.121  32.765  1.00  0.00      LIG  
ATOM   7136 O    LIG     1       9.088   5.801  33.904  1.00  0.00      LIG  
ATOM   7137 N    LIG     1       7.818   7.046  32.434  1.00  0.00      LIG  
ATOM   7138 C2   LIG     1       7.076   7.786  33.448  1.00  0.00      LIG  
ATOM   7139 C3   LIG     1       7.740   9.135  33.578  1.00  0.00      LIG  
ATOM   7140 O1   LIG     1       7.191  10.083  34.120  1.00  0.00      LIG  
ATOM   7141 C4   LIG     1       5.573   7.915  33.150  1.00  0.00      LIG  
ATOM   7142 C5   LIG     1       5.220   8.274  31.699  1.00  0.00      LIG  
ATOM   7143 C6   LIG     1       3.706   8.436  31.519  1.00  0.00      LIG  
ATOM   7144 C7   LIG     1       3.183   9.735  32.134  1.00  0.00      LIG  
ATOM   7145 O2   LIG     1       1.762   9.706  32.189  1.00  0.00      LIG  
ATOM   7146 O3   LIG     1       3.413   8.452  30.120  1.00  0.00      LIG  
ATOM   7147 O4   LIG     1       5.874   9.478  31.298  1.00  0.00      LIG  
ATOM   7148 O5   LIG     1       4.929   6.685  33.479  1.00  0.00      LIG  
ATOM   7149 H    LIG     1      10.517   6.071  31.537  1.00  0.00      LIG  
ATOM   7150 H1   LIG     1       8.997   5.813  30.641  1.00  0.00      LIG  
ATOM   7151 H2   LIG     1       9.642   4.517  31.672  1.00  0.00      LIG  
ATOM   7152 H3   LIG     1       7.715   7.312  31.460  1.00  0.00      LIG  
ATOM   7153 H4   LIG     1       7.218   7.282  34.409  1.00  0.00      LIG  
ATOM   7154 H5   LIG     1       8.838   9.135  33.477  1.00  0.00      LIG  
ATOM   7155 H6   LIG     1       5.152   8.671  33.818  1.00  0.00      LIG  
ATOM   7156 H7   LIG     1       5.566   7.483  31.028  1.00  0.00      LIG  
ATOM   7157 H8   LIG     1       3.170   7.578  31.933  1.00  0.00      LIG  
ATOM   7158 H9   LIG     1       3.471  10.604  31.535  1.00  0.00      LIG  
ATOM   7159 H10  LIG     1       3.546   9.875  33.154  1.00  0.00      LIG  
ATOM   7160 H11  LIG     1       1.462   9.442  31.302  1.00  0.00      LIG  
ATOM   7161 H12  LIG     1       4.039   9.081  29.720  1.00  0.00      LIG  
ATOM   7162 H13  LIG     1       5.743  10.128  32.011  1.00  0.00      LIG  
ATOM   7163 H14  LIG     1       5.310   6.374  34.322  1.00  0.00      LIG  
TER
REMARK  Energy: 4.13862
REMARK  SimpleFitness: 4.13862
REMARK  FullFitness: -2514.7815
REMARK  InterFull: -24.1391
REMARK  IntraFull: 60.6086
REMARK  solvFull: -2905.98
REMARK  surfFull: 354.729
REMARK  extraFull: 0.0
REMARK  deltaGcompsolvpol: -2905.98
REMARK  deltaGcompsolvnonpol: 354.729
REMARK  deltaGprotsolvpol: -2902.69
REMARK  deltaGprotsolvnonpol: 355.646
REMARK  deltaGligsolvpol: -16.4168
REMARK  deltaGligsolvnonpol: 6.65694
REMARK  deltaGvdw: -24.1391
REMARK  deltaGelec: 0.0
REMARK  deltaG: -6.186695
REMARK  Cluster: 5
REMARK  ClusterRank: 6
ATOM   7134 C    LIG     1       9.531   5.600  31.573  1.00  0.00      LIG  
ATOM   7135 C1   LIG     1       8.786   6.121  32.765  1.00  0.00      LIG  
ATOM   7136 O    LIG     1       9.088   5.801  33.904  1.00  0.00      LIG  
ATOM   7137 N    LIG     1       7.818   7.046  32.434  1.00  0.00      LIG  
ATOM   7138 C2   LIG     1       7.076   7.786  33.448  1.00  0.00      LIG  
ATOM   7139 C3   LIG     1       7.740   9.135  33.578  1.00  0.00      LIG  
ATOM   7140 O1   LIG     1       7.191  10.083  34.120  1.00  0.00      LIG  
ATOM   7141 C4   LIG     1       5.573   7.915  33.150  1.00  0.00      LIG  
ATOM   7142 C5   LIG     1       5.220   8.274  31.699  1.00  0.00      LIG  
ATOM   7143 C6   LIG     1       3.706   8.436  31.519  1.00  0.00      LIG  
ATOM   7144 C7   LIG     1       3.183   9.735  32.134  1.00  0.00      LIG  
ATOM   7145 O2   LIG     1       1.762   9.706  32.189  1.00  0.00      LIG  
ATOM   7146 O3   LIG     1       3.413   8.452  30.120  1.00  0.00      LIG  
ATOM   7147 O4   LIG     1       5.874   9.478  31.298  1.00  0.00      LIG  
ATOM   7148 O5   LIG     1       4.929   6.685  33.479  1.00  0.00      LIG  
ATOM   7149 H    LIG     1      10.517   6.071  31.537  1.00  0.00      LIG  
ATOM   7150 H1   LIG     1       8.997   5.813  30.641  1.00  0.00      LIG  
ATOM   7151 H2   LIG     1       9.642   4.517  31.672  1.00  0.00      LIG  
ATOM   7152 H3   LIG     1       7.715   7.312  31.460  1.00  0.00      LIG  
ATOM   7153 H4   LIG     1       7.218   7.282  34.409  1.00  0.00      LIG  
ATOM   7154 H5   LIG     1       8.838   9.135  33.477  1.00  0.00      LIG  
ATOM   7155 H6   LIG     1       5.152   8.671  33.818  1.00  0.00      LIG  
ATOM   7156 H7   LIG     1       5.566   7.483  31.028  1.00  0.00      LIG  
ATOM   7157 H8   LIG     1       3.170   7.578  31.933  1.00  0.00      LIG  
ATOM   7158 H9   LIG     1       3.471  10.604  31.535  1.00  0.00      LIG  
ATOM   7159 H10  LIG     1       3.546   9.875  33.154  1.00  0.00      LIG  
ATOM   7160 H11  LIG     1       1.462   9.442  31.302  1.00  0.00      LIG  
ATOM   7161 H12  LIG     1       4.039   9.081  29.720  1.00  0.00      LIG  
ATOM   7162 H13  LIG     1       5.743  10.128  32.011  1.00  0.00      LIG  
ATOM   7163 H14  LIG     1       5.310   6.374  34.322  1.00  0.00      LIG  
TER
REMARK  Energy: 4.13862
REMARK  SimpleFitness: 4.13862
REMARK  FullFitness: -2514.7815
REMARK  InterFull: -24.1391
REMARK  IntraFull: 60.6086
REMARK  solvFull: -2905.98
REMARK  surfFull: 354.729
REMARK  extraFull: 0.0
REMARK  deltaGcompsolvpol: -2905.98
REMARK  deltaGcompsolvnonpol: 354.729
REMARK  deltaGprotsolvpol: -2902.69
REMARK  deltaGprotsolvnonpol: 355.646
REMARK  deltaGligsolvpol: -16.4168
REMARK  deltaGligsolvnonpol: 6.65694
REMARK  deltaGvdw: -24.1391
REMARK  deltaGelec: 0.0
REMARK  deltaG: -6.186695
REMARK  Cluster: 5
REMARK  ClusterRank: 7
ATOM   7134 C    LIG     1       9.531   5.600  31.573  1.00  0.00      LIG  
ATOM   7135 C1   LIG     1       8.786   6.121  32.765  1.00  0.00      LIG  
ATOM   7136 O    LIG     1       9.088   5.801  33.904  1.00  0.00      LIG  
ATOM   7137 N    LIG     1       7.818   7.046  32.434  1.00  0.00      LIG  
ATOM   7138 C2   LIG     1       7.076   7.786  33.448  1.00  0.00      LIG  
ATOM   7139 C3   LIG     1       7.740   9.135  33.578  1.00  0.00      LIG  
ATOM   7140 O1   LIG     1       7.191  10.083  34.120  1.00  0.00      LIG  
ATOM   7141 C4   LIG     1       5.573   7.915  33.150  1.00  0.00      LIG  
ATOM   7142 C5   LIG     1       5.220   8.274  31.699  1.00  0.00      LIG  
ATOM   7143 C6   LIG     1       3.706   8.436  31.519  1.00  0.00      LIG  
ATOM   7144 C7   LIG     1       3.183   9.735  32.134  1.00  0.00      LIG  
ATOM   7145 O2   LIG     1       1.762   9.706  32.189  1.00  0.00      LIG  
ATOM   7146 O3   LIG     1       3.413   8.452  30.120  1.00  0.00      LIG  
ATOM   7147 O4   LIG     1       5.874   9.478  31.298  1.00  0.00      LIG  
ATOM   7148 O5   LIG     1       4.929   6.685  33.479  1.00  0.00      LIG  
ATOM   7149 H    LIG     1      10.517   6.071  31.537  1.00  0.00      LIG  
ATOM   7150 H1   LIG     1       8.997   5.813  30.641  1.00  0.00      LIG  
ATOM   7151 H2   LIG     1       9.642   4.517  31.672  1.00  0.00      LIG  
ATOM   7152 H3   LIG     1       7.715   7.312  31.460  1.00  0.00      LIG  
ATOM   7153 H4   LIG     1       7.218   7.282  34.409  1.00  0.00      LIG  
ATOM   7154 H5   LIG     1       8.838   9.135  33.477  1.00  0.00      LIG  
ATOM   7155 H6   LIG     1       5.152   8.671  33.818  1.00  0.00      LIG  
ATOM   7156 H7   LIG     1       5.566   7.483  31.028  1.00  0.00      LIG  
ATOM   7157 H8   LIG     1       3.170   7.578  31.933  1.00  0.00      LIG  
ATOM   7158 H9   LIG     1       3.471  10.604  31.535  1.00  0.00      LIG  
ATOM   7159 H10  LIG     1       3.546   9.875  33.154  1.00  0.00      LIG  
ATOM   7160 H11  LIG     1       1.462   9.442  31.302  1.00  0.00      LIG  
ATOM   7161 H12  LIG     1       4.039   9.081  29.720  1.00  0.00      LIG  
ATOM   7162 H13  LIG     1       5.743  10.128  32.011  1.00  0.00      LIG  
ATOM   7163 H14  LIG     1       5.310   6.374  34.322  1.00  0.00      LIG  
TER
REMARK  Energy: 0.171982
REMARK  SimpleFitness: 0.171982
REMARK  FullFitness: -2514.77
REMARK  InterFull: -31.3466
REMARK  IntraFull: 63.5146
REMARK  solvFull: -2901.97
REMARK  surfFull: 355.032
REMARK  extraFull: 0.0
REMARK  deltaGcompsolvpol: -2901.97
REMARK  deltaGcompsolvnonpol: 355.032
REMARK  deltaGprotsolvpol: -2902.69
REMARK  deltaGprotsolvnonpol: 355.646
REMARK  deltaGligsolvpol: -17.7258
REMARK  deltaGligsolvnonpol: 6.48594
REMARK  deltaGvdw: -31.3466
REMARK  deltaGelec: 0.0
REMARK  deltaG: -6.49816
REMARK  Cluster: 6
REMARK  ClusterRank: 0
ATOM   7134 C    LIG     1       8.819  31.080  34.793  1.00  0.00      LIG  
ATOM   7135 C1   LIG     1       8.402  29.975  35.717  1.00  0.00      LIG  
ATOM   7136 O    LIG     1       7.255  29.858  36.116  1.00  0.00      LIG  
ATOM   7137 N    LIG     1       9.432  29.123  36.037  1.00  0.00      LIG  
ATOM   7138 C2   LIG     1       9.244  28.017  36.965  1.00  0.00      LIG  
ATOM   7139 C3   LIG     1      10.366  27.052  36.634  1.00  0.00      LIG  
ATOM   7140 O1   LIG     1      10.699  26.126  37.359  1.00  0.00      LIG  
ATOM   7141 C4   LIG     1       9.211  28.492  38.434  1.00  0.00      LIG  
ATOM   7142 C5   LIG     1       8.664  27.402  39.366  1.00  0.00      LIG  
ATOM   7143 C6   LIG     1       8.732  27.782  40.847  1.00  0.00      LIG  
ATOM   7144 C7   LIG     1       7.877  26.841  41.688  1.00  0.00      LIG  
ATOM   7145 O2   LIG     1       7.956  27.164  43.073  1.00  0.00      LIG  
ATOM   7146 O3   LIG     1      10.086  27.699  41.302  1.00  0.00      LIG  
ATOM   7147 O4   LIG     1       7.319  27.128  38.981  1.00  0.00      LIG  
ATOM   7148 O5   LIG     1      10.491  28.970  38.861  1.00  0.00      LIG  
ATOM   7149 H    LIG     1       9.901  31.088  34.627  1.00  0.00      LIG  
ATOM   7150 H1   LIG     1       8.524  32.036  35.233  1.00  0.00      LIG  
ATOM   7151 H2   LIG     1       8.316  30.943  33.833  1.00  0.00      LIG  
ATOM   7152 H3   LIG     1      10.369  29.354  35.723  1.00  0.00      LIG  
ATOM   7153 H4   LIG     1       8.299  27.535  36.696  1.00  0.00      LIG  
ATOM   7154 H5   LIG     1      10.639  26.997  35.568  1.00  0.00      LIG  
ATOM   7155 H6   LIG     1       8.535  29.351  38.492  1.00  0.00      LIG  
ATOM   7156 H7   LIG     1       9.239  26.483  39.232  1.00  0.00      LIG  
ATOM   7157 H8   LIG     1       8.390  28.810  40.991  1.00  0.00      LIG  
ATOM   7158 H9   LIG     1       8.206  25.807  41.569  1.00  0.00      LIG  
ATOM   7159 H10  LIG     1       6.830  26.905  41.391  1.00  0.00      LIG  
ATOM   7160 H11  LIG     1       8.900  27.313  43.257  1.00  0.00      LIG  
ATOM   7161 H12  LIG     1      10.650  27.953  40.549  1.00  0.00      LIG  
ATOM   7162 H13  LIG     1       6.795  27.940  39.112  1.00  0.00      LIG  
ATOM   7163 H14  LIG     1      10.329  29.551  39.625  1.00  0.00      LIG  
TER
REMARK  Energy: -0.01806096
REMARK  SimpleFitness: -0.01806096
REMARK  FullFitness: -2514.751
REMARK  InterFull: -31.7404
REMARK  IntraFull: 63.6614
REMARK  solvFull: -2901.7
REMARK  surfFull: 355.028
REMARK  extraFull: 0.0
REMARK  deltaGcompsolvpol: -2901.7
REMARK  deltaGcompsolvnonpol: 355.028
REMARK  deltaGprotsolvpol: -2902.69
REMARK  deltaGprotsolvnonpol: 355.646
REMARK  deltaGligsolvpol: -17.657
REMARK  deltaGligsolvnonpol: 6.48161
REMARK  deltaGvdw: -31.7404
REMARK  deltaGelec: 0.0
REMARK  deltaG: -6.5230675
REMARK  Cluster: 6
REMARK  ClusterRank: 1
ATOM   7134 C    LIG     1       8.903  31.200  34.705  1.00  0.00      LIG  
ATOM   7135 C1   LIG     1       8.456  30.106  35.629  1.00  0.00      LIG  
ATOM   7136 O    LIG     1       7.307  30.018  36.032  1.00  0.00      LIG  
ATOM   7137 N    LIG     1       9.464  29.225  35.938  1.00  0.00      LIG  
ATOM   7138 C2   LIG     1       9.251  28.106  36.844  1.00  0.00      LIG  
ATOM   7139 C3   LIG     1      10.364  27.129  36.509  1.00  0.00      LIG  
ATOM   7140 O1   LIG     1      10.652  26.164  37.201  1.00  0.00      LIG  
ATOM   7141 C4   LIG     1       9.212  28.553  38.321  1.00  0.00      LIG  
ATOM   7142 C5   LIG     1       8.656  27.450  39.231  1.00  0.00      LIG  
ATOM   7143 C6   LIG     1       8.727  27.803  40.719  1.00  0.00      LIG  
ATOM   7144 C7   LIG     1       7.864  26.856  41.544  1.00  0.00      LIG  
ATOM   7145 O2   LIG     1       7.957  27.150  42.936  1.00  0.00      LIG  
ATOM   7146 O3   LIG     1      10.079  27.694  41.170  1.00  0.00      LIG  
ATOM   7147 O4   LIG     1       7.311  27.190  38.838  1.00  0.00      LIG  
ATOM   7148 O5   LIG     1      10.498  29.009  38.755  1.00  0.00      LIG  
ATOM   7149 H    LIG     1       9.989  31.191  34.564  1.00  0.00      LIG  
ATOM   7150 H1   LIG     1       8.613  32.161  35.136  1.00  0.00      LIG  
ATOM   7151 H2   LIG     1       8.420  31.066  33.734  1.00  0.00      LIG  
ATOM   7152 H3   LIG     1      10.401  29.425  35.604  1.00  0.00      LIG  
ATOM   7153 H4   LIG     1       8.301  27.647  36.556  1.00  0.00      LIG  
ATOM   7154 H5   LIG     1      10.696  27.132  35.459  1.00  0.00      LIG  
ATOM   7155 H6   LIG     1       8.541  29.415  38.394  1.00  0.00      LIG  
ATOM   7156 H7   LIG     1       9.226  26.531  39.082  1.00  0.00      LIG  
ATOM   7157 H8   LIG     1       8.396  28.832  40.886  1.00  0.00      LIG  
ATOM   7158 H9   LIG     1       8.182  25.821  41.400  1.00  0.00      LIG  
ATOM   7159 H10  LIG     1       6.814  26.939  41.255  1.00  0.00      LIG  
ATOM   7160 H11  LIG     1       8.903  27.306  43.109  1.00  0.00      LIG  
ATOM   7161 H12  LIG     1      10.646  27.908  40.407  1.00  0.00      LIG  
ATOM   7162 H13  LIG     1       6.787  27.997  39.002  1.00  0.00      LIG  
ATOM   7163 H14  LIG     1      10.346  29.583  39.526  1.00  0.00      LIG  
TER
REMARK  Energy: -0.01806096
REMARK  SimpleFitness: -0.01806096
REMARK  FullFitness: -2514.751
REMARK  InterFull: -31.7404
REMARK  IntraFull: 63.6614
REMARK  solvFull: -2901.7
REMARK  surfFull: 355.028
REMARK  extraFull: 0.0
REMARK  deltaGcompsolvpol: -2901.7
REMARK  deltaGcompsolvnonpol: 355.028
REMARK  deltaGprotsolvpol: -2902.69
REMARK  deltaGprotsolvnonpol: 355.646
REMARK  deltaGligsolvpol: -17.657
REMARK  deltaGligsolvnonpol: 6.48161
REMARK  deltaGvdw: -31.7404
REMARK  deltaGelec: 0.0
REMARK  deltaG: -6.5230675
REMARK  Cluster: 6
REMARK  ClusterRank: 2
ATOM   7134 C    LIG     1       8.903  31.200  34.705  1.00  0.00      LIG  
ATOM   7135 C1   LIG     1       8.456  30.106  35.629  1.00  0.00      LIG  
ATOM   7136 O    LIG     1       7.307  30.018  36.032  1.00  0.00      LIG  
ATOM   7137 N    LIG     1       9.464  29.225  35.938  1.00  0.00      LIG  
ATOM   7138 C2   LIG     1       9.251  28.106  36.844  1.00  0.00      LIG  
ATOM   7139 C3   LIG     1      10.364  27.129  36.509  1.00  0.00      LIG  
ATOM   7140 O1   LIG     1      10.652  26.164  37.201  1.00  0.00      LIG  
ATOM   7141 C4   LIG     1       9.212  28.553  38.321  1.00  0.00      LIG  
ATOM   7142 C5   LIG     1       8.656  27.450  39.231  1.00  0.00      LIG  
ATOM   7143 C6   LIG     1       8.727  27.803  40.719  1.00  0.00      LIG  
ATOM   7144 C7   LIG     1       7.864  26.856  41.544  1.00  0.00      LIG  
ATOM   7145 O2   LIG     1       7.957  27.150  42.936  1.00  0.00      LIG  
ATOM   7146 O3   LIG     1      10.079  27.694  41.170  1.00  0.00      LIG  
ATOM   7147 O4   LIG     1       7.311  27.190  38.838  1.00  0.00      LIG  
ATOM   7148 O5   LIG     1      10.498  29.009  38.755  1.00  0.00      LIG  
ATOM   7149 H    LIG     1       9.989  31.191  34.564  1.00  0.00      LIG  
ATOM   7150 H1   LIG     1       8.613  32.161  35.136  1.00  0.00      LIG  
ATOM   7151 H2   LIG     1       8.420  31.066  33.734  1.00  0.00      LIG  
ATOM   7152 H3   LIG     1      10.401  29.425  35.604  1.00  0.00      LIG  
ATOM   7153 H4   LIG     1       8.301  27.647  36.556  1.00  0.00      LIG  
ATOM   7154 H5   LIG     1      10.696  27.132  35.459  1.00  0.00      LIG  
ATOM   7155 H6   LIG     1       8.541  29.415  38.394  1.00  0.00      LIG  
ATOM   7156 H7   LIG     1       9.226  26.531  39.082  1.00  0.00      LIG  
ATOM   7157 H8   LIG     1       8.396  28.832  40.886  1.00  0.00      LIG  
ATOM   7158 H9   LIG     1       8.182  25.821  41.400  1.00  0.00      LIG  
ATOM   7159 H10  LIG     1       6.814  26.939  41.255  1.00  0.00      LIG  
ATOM   7160 H11  LIG     1       8.903  27.306  43.109  1.00  0.00      LIG  
ATOM   7161 H12  LIG     1      10.646  27.908  40.407  1.00  0.00      LIG  
ATOM   7162 H13  LIG     1       6.787  27.997  39.002  1.00  0.00      LIG  
ATOM   7163 H14  LIG     1      10.346  29.583  39.526  1.00  0.00      LIG  
TER
REMARK  Energy: 5.19009
REMARK  SimpleFitness: 5.19009
REMARK  FullFitness: -2511.5396
REMARK  InterFull: -29.4639
REMARK  IntraFull: 65.2773
REMARK  solvFull: -2902.51
REMARK  surfFull: 355.157
REMARK  extraFull: 0.0
REMARK  deltaGcompsolvpol: -2902.51
REMARK  deltaGcompsolvnonpol: 355.157
REMARK  deltaGprotsolvpol: -2902.69
REMARK  deltaGprotsolvnonpol: 355.646
REMARK  deltaGligsolvpol: -17.6407
REMARK  deltaGligsolvnonpol: 6.49187
REMARK  deltaGvdw: -29.4639
REMARK  deltaGelec: 0.0
REMARK  deltaG: -6.3470507
REMARK  Cluster: 6
REMARK  ClusterRank: 3
ATOM   7134 C    LIG     1       7.793  30.225  35.712  1.00  0.00      LIG  
ATOM   7135 C1   LIG     1       7.871  29.015  36.591  1.00  0.00      LIG  
ATOM   7136 O    LIG     1       6.939  28.242  36.748  1.00  0.00      LIG  
ATOM   7137 N    LIG     1       9.115  28.844  37.142  1.00  0.00      LIG  
ATOM   7138 C2   LIG     1       9.359  27.790  38.114  1.00  0.00      LIG  
ATOM   7139 C3   LIG     1      10.814  27.415  37.916  1.00  0.00      LIG  
ATOM   7140 O1   LIG     1      11.452  26.748  38.717  1.00  0.00      LIG  
ATOM   7141 C4   LIG     1       8.976  28.248  39.537  1.00  0.00      LIG  
ATOM   7142 C5   LIG     1       8.883  27.064  40.505  1.00  0.00      LIG  
ATOM   7143 C6   LIG     1       8.681  27.501  41.959  1.00  0.00      LIG  
ATOM   7144 C7   LIG     1       8.163  26.414  42.904  1.00  0.00      LIG  
ATOM   7145 O2   LIG     1       7.420  26.991  43.969  1.00  0.00      LIG  
ATOM   7146 O3   LIG     1       9.929  27.949  42.492  1.00  0.00      LIG  
ATOM   7147 O4   LIG     1       7.821  26.219  40.069  1.00  0.00      LIG  
ATOM   7148 O5   LIG     1       9.870  29.260  40.015  1.00  0.00      LIG  
ATOM   7149 H    LIG     1       8.377  31.049  36.133  1.00  0.00      LIG  
ATOM   7150 H1   LIG     1       6.748  30.538  35.645  1.00  0.00      LIG  
ATOM   7151 H2   LIG     1       8.167  29.976  34.716  1.00  0.00      LIG  
ATOM   7152 H3   LIG     1       9.814  29.567  37.005  1.00  0.00      LIG  
ATOM   7153 H4   LIG     1       8.760  26.924  37.817  1.00  0.00      LIG  
ATOM   7154 H5   LIG     1      11.165  27.443  36.871  1.00  0.00      LIG  
ATOM   7155 H6   LIG     1       7.987  28.715  39.483  1.00  0.00      LIG  
ATOM   7156 H7   LIG     1       9.812  26.505  40.439  1.00  0.00      LIG  
ATOM   7157 H8   LIG     1       7.991  28.342  41.956  1.00  0.00      LIG  
ATOM   7158 H9   LIG     1       8.973  25.847  43.366  1.00  0.00      LIG  
ATOM   7159 H10  LIG     1       7.511  25.715  42.397  1.00  0.00      LIG  
ATOM   7160 H11  LIG     1       8.053  27.502  44.506  1.00  0.00      LIG  
ATOM   7161 H12  LIG     1      10.418  28.358  41.755  1.00  0.00      LIG  
ATOM   7162 H13  LIG     1       6.989  26.712  40.183  1.00  0.00      LIG  
ATOM   7163 H14  LIG     1       9.420  29.703  40.755  1.00  0.00      LIG  
TER
REMARK  Energy: 9.63813
REMARK  SimpleFitness: 9.63813
REMARK  FullFitness: -2503.8298
REMARK  InterFull: -20.1394
REMARK  IntraFull: 65.8705
REMARK  solvFull: -2904.74
REMARK  surfFull: 355.179
REMARK  extraFull: 0.0
REMARK  deltaGcompsolvpol: -2904.74
REMARK  deltaGcompsolvnonpol: 355.179
REMARK  deltaGprotsolvpol: -2902.69
REMARK  deltaGprotsolvnonpol: 355.646
REMARK  deltaGligsolvpol: -17.6645
REMARK  deltaGligsolvnonpol: 6.50229
REMARK  deltaGvdw: -20.1394
REMARK  deltaGelec: 0.0
REMARK  deltaG: -5.598879
REMARK  Cluster: 6
REMARK  ClusterRank: 4
ATOM   7134 C    LIG     1       8.307  30.213  35.413  1.00  0.00      LIG  
ATOM   7135 C1   LIG     1       8.055  29.046  36.321  1.00  0.00      LIG  
ATOM   7136 O    LIG     1       6.934  28.710  36.665  1.00  0.00      LIG  
ATOM   7137 N    LIG     1       9.204  28.455  36.779  1.00  0.00      LIG  
ATOM   7138 C2   LIG     1       9.154  27.431  37.810  1.00  0.00      LIG  
ATOM   7139 C3   LIG     1      10.379  26.565  37.614  1.00  0.00      LIG  
ATOM   7140 O1   LIG     1      10.924  26.395  36.532  1.00  0.00      LIG  
ATOM   7141 C4   LIG     1       9.072  28.055  39.219  1.00  0.00      LIG  
ATOM   7142 C5   LIG     1       8.739  27.018  40.299  1.00  0.00      LIG  
ATOM   7143 C6   LIG     1       8.670  27.665  41.685  1.00  0.00      LIG  
ATOM   7144 C7   LIG     1       7.853  26.935  42.755  1.00  0.00      LIG  
ATOM   7145 O2   LIG     1       8.428  25.743  43.253  1.00  0.00      LIG  
ATOM   7146 O3   LIG     1       9.981  27.929  42.187  1.00  0.00      LIG  
ATOM   7147 O4   LIG     1       7.499  26.401  39.970  1.00  0.00      LIG  
ATOM   7148 O5   LIG     1      10.280  28.755  39.541  1.00  0.00      LIG  
ATOM   7149 H    LIG     1       7.587  30.180  34.592  1.00  0.00      LIG  
ATOM   7150 H1   LIG     1       9.317  30.179  34.992  1.00  0.00      LIG  
ATOM   7151 H2   LIG     1       8.180  31.139  35.980  1.00  0.00      LIG  
ATOM   7152 H3   LIG     1      10.104  28.822  36.489  1.00  0.00      LIG  
ATOM   7153 H4   LIG     1       8.276  26.804  37.632  1.00  0.00      LIG  
ATOM   7154 H5   LIG     1      10.608  25.882  38.445  1.00  0.00      LIG  
ATOM   7155 H6   LIG     1       8.271  28.801  39.213  1.00  0.00      LIG  
ATOM   7156 H7   LIG     1       9.514  26.262  40.291  1.00  0.00      LIG  
ATOM   7157 H8   LIG     1       8.176  28.625  41.533  1.00  0.00      LIG  
ATOM   7158 H9   LIG     1       6.877  26.682  42.363  1.00  0.00      LIG  
ATOM   7159 H10  LIG     1       7.718  27.582  43.625  1.00  0.00      LIG  
ATOM   7160 H11  LIG     1       9.223  26.007  43.746  1.00  0.00      LIG  
ATOM   7161 H12  LIG     1      10.424  27.069  42.284  1.00  0.00      LIG  
ATOM   7162 H13  LIG     1       6.823  27.101  39.936  1.00  0.00      LIG  
ATOM   7163 H14  LIG     1      10.280  28.885  40.508  1.00  0.00      LIG  
TER
REMARK  Energy: 9.32529
REMARK  SimpleFitness: 9.32529
REMARK  FullFitness: -2503.3381
REMARK  InterFull: -19.0902
REMARK  IntraFull: 64.8941
REMARK  solvFull: -2904.33
REMARK  surfFull: 355.188
REMARK  extraFull: 0.0
REMARK  deltaGcompsolvpol: -2904.33
REMARK  deltaGcompsolvnonpol: 355.188
REMARK  deltaGprotsolvpol: -2902.69
REMARK  deltaGprotsolvnonpol: 355.646
REMARK  deltaGligsolvpol: -17.4949
REMARK  deltaGligsolvnonpol: 6.53289
REMARK  deltaGvdw: -19.0902
REMARK  deltaGelec: 0.0
REMARK  deltaG: -5.4869604
REMARK  Cluster: 6
REMARK  ClusterRank: 5
ATOM   7134 C    LIG     1       8.500  30.404  35.190  1.00  0.00      LIG  
ATOM   7135 C1   LIG     1       8.225  29.295  36.161  1.00  0.00      LIG  
ATOM   7136 O    LIG     1       7.108  29.079  36.604  1.00  0.00      LIG  
ATOM   7137 N    LIG     1       9.337  28.557  36.485  1.00  0.00      LIG  
ATOM   7138 C2   LIG     1       9.262  27.511  37.491  1.00  0.00      LIG  
ATOM   7139 C3   LIG     1      10.412  26.563  37.230  1.00  0.00      LIG  
ATOM   7140 O1   LIG     1      10.926  26.408  36.131  1.00  0.00      LIG  
ATOM   7141 C4   LIG     1       9.269  28.101  38.916  1.00  0.00      LIG  
ATOM   7142 C5   LIG     1       8.848  27.077  39.971  1.00  0.00      LIG  
ATOM   7143 C6   LIG     1       8.781  27.734  41.350  1.00  0.00      LIG  
ATOM   7144 C7   LIG     1       7.817  27.073  42.330  1.00  0.00      LIG  
ATOM   7145 O2   LIG     1       8.165  25.763  42.731  1.00  0.00      LIG  
ATOM   7146 O3   LIG     1      10.080  27.835  41.936  1.00  0.00      LIG  
ATOM   7147 O4   LIG     1       7.572  26.556  39.610  1.00  0.00      LIG  
ATOM   7148 O5   LIG     1      10.539  28.671  39.250  1.00  0.00      LIG  
ATOM   7149 H    LIG     1       7.958  30.200  34.264  1.00  0.00      LIG  
ATOM   7150 H1   LIG     1       9.569  30.489  34.969  1.00  0.00      LIG  
ATOM   7151 H2   LIG     1       8.148  31.345  35.621  1.00  0.00      LIG  
ATOM   7152 H3   LIG     1      10.240  28.810  36.098  1.00  0.00      LIG  
ATOM   7153 H4   LIG     1       8.336  26.954  37.323  1.00  0.00      LIG  
ATOM   7154 H5   LIG     1      10.578  25.805  38.010  1.00  0.00      LIG  
ATOM   7155 H6   LIG     1       8.542  28.920  38.945  1.00  0.00      LIG  
ATOM   7156 H7   LIG     1       9.565  26.258  39.979  1.00  0.00      LIG  
ATOM   7157 H8   LIG     1       8.414  28.752  41.198  1.00  0.00      LIG  
ATOM   7158 H9   LIG     1       6.835  27.023  41.869  1.00  0.00      LIG  
ATOM   7159 H10  LIG     1       7.748  27.653  43.250  1.00  0.00      LIG  
ATOM   7160 H11  LIG     1       8.960  25.841  43.284  1.00  0.00      LIG  
ATOM   7161 H12  LIG     1      10.416  26.928  42.038  1.00  0.00      LIG  
ATOM   7162 H13  LIG     1       6.921  27.275  39.697  1.00  0.00      LIG  
ATOM   7163 H14  LIG     1      10.490  28.924  40.191  1.00  0.00      LIG  
TER
REMARK  Energy: 9.32529
REMARK  SimpleFitness: 9.32529
REMARK  FullFitness: -2503.3381
REMARK  InterFull: -19.0902
REMARK  IntraFull: 64.8941
REMARK  solvFull: -2904.33
REMARK  surfFull: 355.188
REMARK  extraFull: 0.0
REMARK  deltaGcompsolvpol: -2904.33
REMARK  deltaGcompsolvnonpol: 355.188
REMARK  deltaGprotsolvpol: -2902.69
REMARK  deltaGprotsolvnonpol: 355.646
REMARK  deltaGligsolvpol: -17.4949
REMARK  deltaGligsolvnonpol: 6.53289
REMARK  deltaGvdw: -19.0902
REMARK  deltaGelec: 0.0
REMARK  deltaG: -5.4869604
REMARK  Cluster: 6
REMARK  ClusterRank: 6
ATOM   7134 C    LIG     1       8.500  30.404  35.190  1.00  0.00      LIG  
ATOM   7135 C1   LIG     1       8.225  29.295  36.161  1.00  0.00      LIG  
ATOM   7136 O    LIG     1       7.108  29.079  36.604  1.00  0.00      LIG  
ATOM   7137 N    LIG     1       9.337  28.557  36.485  1.00  0.00      LIG  
ATOM   7138 C2   LIG     1       9.262  27.511  37.491  1.00  0.00      LIG  
ATOM   7139 C3   LIG     1      10.412  26.563  37.230  1.00  0.00      LIG  
ATOM   7140 O1   LIG     1      10.926  26.408  36.131  1.00  0.00      LIG  
ATOM   7141 C4   LIG     1       9.269  28.101  38.916  1.00  0.00      LIG  
ATOM   7142 C5   LIG     1       8.848  27.077  39.971  1.00  0.00      LIG  
ATOM   7143 C6   LIG     1       8.781  27.734  41.350  1.00  0.00      LIG  
ATOM   7144 C7   LIG     1       7.817  27.073  42.330  1.00  0.00      LIG  
ATOM   7145 O2   LIG     1       8.165  25.763  42.731  1.00  0.00      LIG  
ATOM   7146 O3   LIG     1      10.080  27.835  41.936  1.00  0.00      LIG  
ATOM   7147 O4   LIG     1       7.572  26.556  39.610  1.00  0.00      LIG  
ATOM   7148 O5   LIG     1      10.539  28.671  39.250  1.00  0.00      LIG  
ATOM   7149 H    LIG     1       7.958  30.200  34.264  1.00  0.00      LIG  
ATOM   7150 H1   LIG     1       9.569  30.489  34.969  1.00  0.00      LIG  
ATOM   7151 H2   LIG     1       8.148  31.345  35.621  1.00  0.00      LIG  
ATOM   7152 H3   LIG     1      10.240  28.810  36.098  1.00  0.00      LIG  
ATOM   7153 H4   LIG     1       8.336  26.954  37.323  1.00  0.00      LIG  
ATOM   7154 H5   LIG     1      10.578  25.805  38.010  1.00  0.00      LIG  
ATOM   7155 H6   LIG     1       8.542  28.920  38.945  1.00  0.00      LIG  
ATOM   7156 H7   LIG     1       9.565  26.258  39.979  1.00  0.00      LIG  
ATOM   7157 H8   LIG     1       8.414  28.752  41.198  1.00  0.00      LIG  
ATOM   7158 H9   LIG     1       6.835  27.023  41.869  1.00  0.00      LIG  
ATOM   7159 H10  LIG     1       7.748  27.653  43.250  1.00  0.00      LIG  
ATOM   7160 H11  LIG     1       8.960  25.841  43.284  1.00  0.00      LIG  
ATOM   7161 H12  LIG     1      10.416  26.928  42.038  1.00  0.00      LIG  
ATOM   7162 H13  LIG     1       6.921  27.275  39.697  1.00  0.00      LIG  
ATOM   7163 H14  LIG     1      10.490  28.924  40.191  1.00  0.00      LIG  
TER
REMARK  Energy: 11.2012
REMARK  SimpleFitness: 11.2012
REMARK  FullFitness: -2500.345
REMARK  InterFull: -18.0892
REMARK  IntraFull: 67.0281
REMARK  solvFull: -2904.47
REMARK  surfFull: 355.186
REMARK  extraFull: 0.0
REMARK  deltaGcompsolvpol: -2904.47
REMARK  deltaGcompsolvnonpol: 355.186
REMARK  deltaGprotsolvpol: -2902.69
REMARK  deltaGprotsolvnonpol: 355.646
REMARK  deltaGligsolvpol: -17.1928
REMARK  deltaGligsolvnonpol: 6.50202
REMARK  deltaGvdw: -18.0892
REMARK  deltaGelec: 0.0
REMARK  deltaG: -5.416583
REMARK  Cluster: 6
REMARK  ClusterRank: 7
ATOM   7134 C    LIG     1       8.192  30.187  35.510  1.00  0.00      LIG  
ATOM   7135 C1   LIG     1       7.982  28.997  36.400  1.00  0.00      LIG  
ATOM   7136 O    LIG     1       6.874  28.582  36.697  1.00  0.00      LIG  
ATOM   7137 N    LIG     1       9.149  28.473  36.893  1.00  0.00      LIG  
ATOM   7138 C2   LIG     1       9.126  27.443  37.916  1.00  0.00      LIG  
ATOM   7139 C3   LIG     1      10.367  26.601  37.708  1.00  0.00      LIG  
ATOM   7140 O1   LIG     1      10.895  26.430  36.618  1.00  0.00      LIG  
ATOM   7141 C4   LIG     1       9.033  28.061  39.325  1.00  0.00      LIG  
ATOM   7142 C5   LIG     1       8.663  27.015  40.386  1.00  0.00      LIG  
ATOM   7143 C6   LIG     1       8.661  27.620  41.793  1.00  0.00      LIG  
ATOM   7144 C7   LIG     1       7.857  26.889  42.872  1.00  0.00      LIG  
ATOM   7145 O2   LIG     1       8.435  25.685  43.343  1.00  0.00      LIG  
ATOM   7146 O3   LIG     1       9.991  27.847  42.263  1.00  0.00      LIG  
ATOM   7147 O4   LIG     1       7.373  26.494  40.080  1.00  0.00      LIG  
ATOM   7148 O5   LIG     1      10.245  28.745  39.662  1.00  0.00      LIG  
ATOM   7149 H    LIG     1       7.563  30.080  34.622  1.00  0.00      LIG  
ATOM   7150 H1   LIG     1       9.238  30.267  35.191  1.00  0.00      LIG  
ATOM   7151 H2   LIG     1       7.912  31.094  36.057  1.00  0.00      LIG  
ATOM   7152 H3   LIG     1      10.033  28.900  36.637  1.00  0.00      LIG  
ATOM   7153 H4   LIG     1       8.261  26.796  37.744  1.00  0.00      LIG  
ATOM   7154 H5   LIG     1      10.625  25.936  38.544  1.00  0.00      LIG  
ATOM   7155 H6   LIG     1       8.241  28.819  39.315  1.00  0.00      LIG  
ATOM   7156 H7   LIG     1       9.384  26.207  40.334  1.00  0.00      LIG  
ATOM   7157 H8   LIG     1       8.182  28.591  41.673  1.00  0.00      LIG  
ATOM   7158 H9   LIG     1       6.869  26.648  42.504  1.00  0.00      LIG  
ATOM   7159 H10  LIG     1       7.746  27.531  43.749  1.00  0.00      LIG  
ATOM   7160 H11  LIG     1       9.248  25.937  43.813  1.00  0.00      LIG  
ATOM   7161 H12  LIG     1      10.418  26.976  42.331  1.00  0.00      LIG  
ATOM   7162 H13  LIG     1       7.149  26.768  39.171  1.00  0.00      LIG  
ATOM   7163 H14  LIG     1      10.245  28.855  40.631  1.00  0.00      LIG  
TER
REMARK  Energy: 1.87273
REMARK  SimpleFitness: 1.87273
REMARK  FullFitness: -2514.546
REMARK  InterFull: -33.8267
REMARK  IntraFull: 62.6038
REMARK  solvFull: -2898.92
REMARK  surfFull: 355.597
REMARK  extraFull: 0.0
REMARK  deltaGcompsolvpol: -2898.92
REMARK  deltaGcompsolvnonpol: 355.597
REMARK  deltaGprotsolvpol: -2902.69
REMARK  deltaGprotsolvnonpol: 355.646
REMARK  deltaGligsolvpol: -16.7962
REMARK  deltaGligsolvnonpol: 6.64149
REMARK  deltaGvdw: -33.8267
REMARK  deltaGelec: 0.0
REMARK  deltaG: -6.5642743
REMARK  Cluster: 7
REMARK  ClusterRank: 0
ATOM   7134 C    LIG     1       6.214 -13.386  45.480  1.00  0.00      LIG  
ATOM   7135 C1   LIG     1       6.507 -14.821  45.174  1.00  0.00      LIG  
ATOM   7136 O    LIG     1       7.223 -15.512  45.884  1.00  0.00      LIG  
ATOM   7137 N    LIG     1       5.905 -15.230  44.006  1.00  0.00      LIG  
ATOM   7138 C2   LIG     1       5.945 -16.607  43.532  1.00  0.00      LIG  
ATOM   7139 C3   LIG     1       4.663 -17.252  44.005  1.00  0.00      LIG  
ATOM   7140 O1   LIG     1       4.244 -18.299  43.532  1.00  0.00      LIG  
ATOM   7141 C4   LIG     1       6.110 -16.727  42.005  1.00  0.00      LIG  
ATOM   7142 C5   LIG     1       5.460 -15.590  41.202  1.00  0.00      LIG  
ATOM   7143 C6   LIG     1       5.603 -15.780  39.682  1.00  0.00      LIG  
ATOM   7144 C7   LIG     1       4.478 -16.588  39.039  1.00  0.00      LIG  
ATOM   7145 O2   LIG     1       4.428 -17.916  39.541  1.00  0.00      LIG  
ATOM   7146 O3   LIG     1       5.608 -14.498  39.054  1.00  0.00      LIG  
ATOM   7147 O4   LIG     1       4.079 -15.464  41.545  1.00  0.00      LIG  
ATOM   7148 O5   LIG     1       7.504 -16.779  41.704  1.00  0.00      LIG  
ATOM   7149 H    LIG     1       6.372 -13.215  46.548  1.00  0.00      LIG  
ATOM   7150 H1   LIG     1       5.173 -13.150  45.239  1.00  0.00      LIG  
ATOM   7151 H2   LIG     1       6.883 -12.745  44.900  1.00  0.00      LIG  
ATOM   7152 H3   LIG     1       5.278 -14.582  43.539  1.00  0.00      LIG  
ATOM   7153 H4   LIG     1       6.759 -17.124  44.050  1.00  0.00      LIG  
ATOM   7154 H5   LIG     1       4.326 -16.951  45.010  1.00  0.00      LIG  
ATOM   7155 H6   LIG     1       5.702 -17.685  41.675  1.00  0.00      LIG  
ATOM   7156 H7   LIG     1       5.947 -14.648  41.474  1.00  0.00      LIG  
ATOM   7157 H8   LIG     1       6.564 -16.248  39.459  1.00  0.00      LIG  
ATOM   7158 H9   LIG     1       4.621 -16.637  37.956  1.00  0.00      LIG  
ATOM   7159 H10  LIG     1       3.504 -16.115  39.197  1.00  0.00      LIG  
ATOM   7160 H11  LIG     1       5.305 -18.307  39.392  1.00  0.00      LIG  
ATOM   7161 H12  LIG     1       5.062 -13.911  39.609  1.00  0.00      LIG  
ATOM   7162 H13  LIG     1       3.656 -16.309  41.312  1.00  0.00      LIG  
ATOM   7163 H14  LIG     1       7.806 -15.863  41.559  1.00  0.00      LIG  
TER
REMARK  Energy: 1.87273
REMARK  SimpleFitness: 1.87273
REMARK  FullFitness: -2514.546
REMARK  InterFull: -33.8267
REMARK  IntraFull: 62.6038
REMARK  solvFull: -2898.92
REMARK  surfFull: 355.597
REMARK  extraFull: 0.0
REMARK  deltaGcompsolvpol: -2898.92
REMARK  deltaGcompsolvnonpol: 355.597
REMARK  deltaGprotsolvpol: -2902.69
REMARK  deltaGprotsolvnonpol: 355.646
REMARK  deltaGligsolvpol: -16.7962
REMARK  deltaGligsolvnonpol: 6.64149
REMARK  deltaGvdw: -33.8267
REMARK  deltaGelec: 0.0
REMARK  deltaG: -6.5642743
REMARK  Cluster: 7
REMARK  ClusterRank: 1
ATOM   7134 C    LIG     1       6.214 -13.386  45.480  1.00  0.00      LIG  
ATOM   7135 C1   LIG     1       6.507 -14.821  45.174  1.00  0.00      LIG  
ATOM   7136 O    LIG     1       7.223 -15.512  45.884  1.00  0.00      LIG  
ATOM   7137 N    LIG     1       5.905 -15.230  44.006  1.00  0.00      LIG  
ATOM   7138 C2   LIG     1       5.945 -16.607  43.532  1.00  0.00      LIG  
ATOM   7139 C3   LIG     1       4.663 -17.252  44.005  1.00  0.00      LIG  
ATOM   7140 O1   LIG     1       4.244 -18.299  43.532  1.00  0.00      LIG  
ATOM   7141 C4   LIG     1       6.110 -16.727  42.005  1.00  0.00      LIG  
ATOM   7142 C5   LIG     1       5.460 -15.590  41.202  1.00  0.00      LIG  
ATOM   7143 C6   LIG     1       5.603 -15.780  39.682  1.00  0.00      LIG  
ATOM   7144 C7   LIG     1       4.478 -16.588  39.039  1.00  0.00      LIG  
ATOM   7145 O2   LIG     1       4.428 -17.916  39.541  1.00  0.00      LIG  
ATOM   7146 O3   LIG     1       5.608 -14.498  39.054  1.00  0.00      LIG  
ATOM   7147 O4   LIG     1       4.079 -15.464  41.545  1.00  0.00      LIG  
ATOM   7148 O5   LIG     1       7.504 -16.779  41.704  1.00  0.00      LIG  
ATOM   7149 H    LIG     1       6.372 -13.215  46.548  1.00  0.00      LIG  
ATOM   7150 H1   LIG     1       5.173 -13.150  45.239  1.00  0.00      LIG  
ATOM   7151 H2   LIG     1       6.883 -12.745  44.900  1.00  0.00      LIG  
ATOM   7152 H3   LIG     1       5.278 -14.582  43.539  1.00  0.00      LIG  
ATOM   7153 H4   LIG     1       6.759 -17.124  44.050  1.00  0.00      LIG  
ATOM   7154 H5   LIG     1       4.326 -16.951  45.010  1.00  0.00      LIG  
ATOM   7155 H6   LIG     1       5.702 -17.685  41.675  1.00  0.00      LIG  
ATOM   7156 H7   LIG     1       5.947 -14.648  41.474  1.00  0.00      LIG  
ATOM   7157 H8   LIG     1       6.564 -16.248  39.459  1.00  0.00      LIG  
ATOM   7158 H9   LIG     1       4.621 -16.637  37.956  1.00  0.00      LIG  
ATOM   7159 H10  LIG     1       3.504 -16.115  39.197  1.00  0.00      LIG  
ATOM   7160 H11  LIG     1       5.305 -18.307  39.392  1.00  0.00      LIG  
ATOM   7161 H12  LIG     1       5.062 -13.911  39.609  1.00  0.00      LIG  
ATOM   7162 H13  LIG     1       3.656 -16.309  41.312  1.00  0.00      LIG  
ATOM   7163 H14  LIG     1       7.806 -15.863  41.559  1.00  0.00      LIG  
TER
REMARK  Energy: 1.87273
REMARK  SimpleFitness: 1.87273
REMARK  FullFitness: -2514.546
REMARK  InterFull: -33.8267
REMARK  IntraFull: 62.6038
REMARK  solvFull: -2898.92
REMARK  surfFull: 355.597
REMARK  extraFull: 0.0
REMARK  deltaGcompsolvpol: -2898.92
REMARK  deltaGcompsolvnonpol: 355.597
REMARK  deltaGprotsolvpol: -2902.69
REMARK  deltaGprotsolvnonpol: 355.646
REMARK  deltaGligsolvpol: -16.7962
REMARK  deltaGligsolvnonpol: 6.64149
REMARK  deltaGvdw: -33.8267
REMARK  deltaGelec: 0.0
REMARK  deltaG: -6.5642743
REMARK  Cluster: 7
REMARK  ClusterRank: 2
ATOM   7134 C    LIG     1       6.214 -13.386  45.480  1.00  0.00      LIG  
ATOM   7135 C1   LIG     1       6.507 -14.821  45.174  1.00  0.00      LIG  
ATOM   7136 O    LIG     1       7.223 -15.512  45.884  1.00  0.00      LIG  
ATOM   7137 N    LIG     1       5.905 -15.230  44.006  1.00  0.00      LIG  
ATOM   7138 C2   LIG     1       5.945 -16.607  43.532  1.00  0.00      LIG  
ATOM   7139 C3   LIG     1       4.663 -17.252  44.005  1.00  0.00      LIG  
ATOM   7140 O1   LIG     1       4.244 -18.299  43.532  1.00  0.00      LIG  
ATOM   7141 C4   LIG     1       6.110 -16.727  42.005  1.00  0.00      LIG  
ATOM   7142 C5   LIG     1       5.460 -15.590  41.202  1.00  0.00      LIG  
ATOM   7143 C6   LIG     1       5.603 -15.780  39.682  1.00  0.00      LIG  
ATOM   7144 C7   LIG     1       4.478 -16.588  39.039  1.00  0.00      LIG  
ATOM   7145 O2   LIG     1       4.428 -17.916  39.541  1.00  0.00      LIG  
ATOM   7146 O3   LIG     1       5.608 -14.498  39.054  1.00  0.00      LIG  
ATOM   7147 O4   LIG     1       4.079 -15.464  41.545  1.00  0.00      LIG  
ATOM   7148 O5   LIG     1       7.504 -16.779  41.704  1.00  0.00      LIG  
ATOM   7149 H    LIG     1       6.372 -13.215  46.548  1.00  0.00      LIG  
ATOM   7150 H1   LIG     1       5.173 -13.150  45.239  1.00  0.00      LIG  
ATOM   7151 H2   LIG     1       6.883 -12.745  44.900  1.00  0.00      LIG  
ATOM   7152 H3   LIG     1       5.278 -14.582  43.539  1.00  0.00      LIG  
ATOM   7153 H4   LIG     1       6.759 -17.124  44.050  1.00  0.00      LIG  
ATOM   7154 H5   LIG     1       4.326 -16.951  45.010  1.00  0.00      LIG  
ATOM   7155 H6   LIG     1       5.702 -17.685  41.675  1.00  0.00      LIG  
ATOM   7156 H7   LIG     1       5.947 -14.648  41.474  1.00  0.00      LIG  
ATOM   7157 H8   LIG     1       6.564 -16.248  39.459  1.00  0.00      LIG  
ATOM   7158 H9   LIG     1       4.621 -16.637  37.956  1.00  0.00      LIG  
ATOM   7159 H10  LIG     1       3.504 -16.115  39.197  1.00  0.00      LIG  
ATOM   7160 H11  LIG     1       5.305 -18.307  39.392  1.00  0.00      LIG  
ATOM   7161 H12  LIG     1       5.062 -13.911  39.609  1.00  0.00      LIG  
ATOM   7162 H13  LIG     1       3.656 -16.309  41.312  1.00  0.00      LIG  
ATOM   7163 H14  LIG     1       7.806 -15.863  41.559  1.00  0.00      LIG  
TER
REMARK  Energy: 1.87273
REMARK  SimpleFitness: 1.87273
REMARK  FullFitness: -2514.546
REMARK  InterFull: -33.8267
REMARK  IntraFull: 62.6038
REMARK  solvFull: -2898.92
REMARK  surfFull: 355.597
REMARK  extraFull: 0.0
REMARK  deltaGcompsolvpol: -2898.92
REMARK  deltaGcompsolvnonpol: 355.597
REMARK  deltaGprotsolvpol: -2902.69
REMARK  deltaGprotsolvnonpol: 355.646
REMARK  deltaGligsolvpol: -16.7962
REMARK  deltaGligsolvnonpol: 6.64149
REMARK  deltaGvdw: -33.8267
REMARK  deltaGelec: 0.0
REMARK  deltaG: -6.5642743
REMARK  Cluster: 7
REMARK  ClusterRank: 3
ATOM   7134 C    LIG     1       6.214 -13.386  45.480  1.00  0.00      LIG  
ATOM   7135 C1   LIG     1       6.507 -14.821  45.174  1.00  0.00      LIG  
ATOM   7136 O    LIG     1       7.223 -15.512  45.884  1.00  0.00      LIG  
ATOM   7137 N    LIG     1       5.905 -15.230  44.006  1.00  0.00      LIG  
ATOM   7138 C2   LIG     1       5.945 -16.607  43.532  1.00  0.00      LIG  
ATOM   7139 C3   LIG     1       4.663 -17.252  44.005  1.00  0.00      LIG  
ATOM   7140 O1   LIG     1       4.244 -18.299  43.532  1.00  0.00      LIG  
ATOM   7141 C4   LIG     1       6.110 -16.727  42.005  1.00  0.00      LIG  
ATOM   7142 C5   LIG     1       5.460 -15.590  41.202  1.00  0.00      LIG  
ATOM   7143 C6   LIG     1       5.603 -15.780  39.682  1.00  0.00      LIG  
ATOM   7144 C7   LIG     1       4.478 -16.588  39.039  1.00  0.00      LIG  
ATOM   7145 O2   LIG     1       4.428 -17.916  39.541  1.00  0.00      LIG  
ATOM   7146 O3   LIG     1       5.608 -14.498  39.054  1.00  0.00      LIG  
ATOM   7147 O4   LIG     1       4.079 -15.464  41.545  1.00  0.00      LIG  
ATOM   7148 O5   LIG     1       7.504 -16.779  41.704  1.00  0.00      LIG  
ATOM   7149 H    LIG     1       6.372 -13.215  46.548  1.00  0.00      LIG  
ATOM   7150 H1   LIG     1       5.173 -13.150  45.239  1.00  0.00      LIG  
ATOM   7151 H2   LIG     1       6.883 -12.745  44.900  1.00  0.00      LIG  
ATOM   7152 H3   LIG     1       5.278 -14.582  43.539  1.00  0.00      LIG  
ATOM   7153 H4   LIG     1       6.759 -17.124  44.050  1.00  0.00      LIG  
ATOM   7154 H5   LIG     1       4.326 -16.951  45.010  1.00  0.00      LIG  
ATOM   7155 H6   LIG     1       5.702 -17.685  41.675  1.00  0.00      LIG  
ATOM   7156 H7   LIG     1       5.947 -14.648  41.474  1.00  0.00      LIG  
ATOM   7157 H8   LIG     1       6.564 -16.248  39.459  1.00  0.00      LIG  
ATOM   7158 H9   LIG     1       4.621 -16.637  37.956  1.00  0.00      LIG  
ATOM   7159 H10  LIG     1       3.504 -16.115  39.197  1.00  0.00      LIG  
ATOM   7160 H11  LIG     1       5.305 -18.307  39.392  1.00  0.00      LIG  
ATOM   7161 H12  LIG     1       5.062 -13.911  39.609  1.00  0.00      LIG  
ATOM   7162 H13  LIG     1       3.656 -16.309  41.312  1.00  0.00      LIG  
ATOM   7163 H14  LIG     1       7.806 -15.863  41.559  1.00  0.00      LIG  
TER
REMARK  Energy: 1.8361
REMARK  SimpleFitness: 1.8361
REMARK  FullFitness: -2514.517
REMARK  InterFull: -33.7693
REMARK  IntraFull: 62.5881
REMARK  solvFull: -2898.9
REMARK  surfFull: 355.564
REMARK  extraFull: 0.0
REMARK  deltaGcompsolvpol: -2898.9
REMARK  deltaGcompsolvnonpol: 355.564
REMARK  deltaGprotsolvpol: -2902.69
REMARK  deltaGprotsolvnonpol: 355.646
REMARK  deltaGligsolvpol: -16.8277
REMARK  deltaGligsolvnonpol: 6.64104
REMARK  deltaGvdw: -33.7693
REMARK  deltaGelec: 0.0
REMARK  deltaG: -6.5587697
REMARK  Cluster: 7
REMARK  ClusterRank: 4
ATOM   7134 C    LIG     1       6.196 -13.338  45.478  1.00  0.00      LIG  
ATOM   7135 C1   LIG     1       6.466 -14.779  45.177  1.00  0.00      LIG  
ATOM   7136 O    LIG     1       7.174 -15.476  45.888  1.00  0.00      LIG  
ATOM   7137 N    LIG     1       5.849 -15.184  44.015  1.00  0.00      LIG  
ATOM   7138 C2   LIG     1       5.865 -16.565  43.549  1.00  0.00      LIG  
ATOM   7139 C3   LIG     1       4.563 -17.180  44.008  1.00  0.00      LIG  
ATOM   7140 O1   LIG     1       4.128 -18.219  43.535  1.00  0.00      LIG  
ATOM   7141 C4   LIG     1       6.053 -16.700  42.027  1.00  0.00      LIG  
ATOM   7142 C5   LIG     1       5.414 -15.572  41.203  1.00  0.00      LIG  
ATOM   7143 C6   LIG     1       5.584 -15.774  39.687  1.00  0.00      LIG  
ATOM   7144 C7   LIG     1       4.477 -16.598  39.033  1.00  0.00      LIG  
ATOM   7145 O2   LIG     1       4.431 -17.922  39.544  1.00  0.00      LIG  
ATOM   7146 O3   LIG     1       5.591 -14.498  39.048  1.00  0.00      LIG  
ATOM   7147 O4   LIG     1       4.028 -15.448  41.520  1.00  0.00      LIG  
ATOM   7148 O5   LIG     1       7.451 -16.752  41.746  1.00  0.00      LIG  
ATOM   7149 H    LIG     1       6.402 -13.157  46.536  1.00  0.00      LIG  
ATOM   7150 H1   LIG     1       5.146 -13.101  45.281  1.00  0.00      LIG  
ATOM   7151 H2   LIG     1       6.843 -12.709  44.862  1.00  0.00      LIG  
ATOM   7152 H3   LIG     1       5.231 -14.528  43.547  1.00  0.00      LIG  
ATOM   7153 H4   LIG     1       6.660 -17.097  44.083  1.00  0.00      LIG  
ATOM   7154 H5   LIG     1       4.218 -16.864  45.006  1.00  0.00      LIG  
ATOM   7155 H6   LIG     1       5.649 -17.661  41.702  1.00  0.00      LIG  
ATOM   7156 H7   LIG     1       5.893 -14.626  41.475  1.00  0.00      LIG  
ATOM   7157 H8   LIG     1       6.553 -16.235  39.481  1.00  0.00      LIG  
ATOM   7158 H9   LIG     1       4.636 -16.654  37.953  1.00  0.00      LIG  
ATOM   7159 H10  LIG     1       3.497 -16.133  39.172  1.00  0.00      LIG  
ATOM   7160 H11  LIG     1       5.313 -18.308  39.411  1.00  0.00      LIG  
ATOM   7161 H12  LIG     1       5.052 -13.903  39.602  1.00  0.00      LIG  
ATOM   7162 H13  LIG     1       3.614 -16.302  41.299  1.00  0.00      LIG  
ATOM   7163 H14  LIG     1       7.758 -15.836  41.623  1.00  0.00      LIG  
TER
REMARK  Energy: 2.00727
REMARK  SimpleFitness: 2.00727
REMARK  FullFitness: -2514.4978
REMARK  InterFull: -34.7157
REMARK  IntraFull: 63.4699
REMARK  solvFull: -2898.76
REMARK  surfFull: 355.508
REMARK  extraFull: 0.0
REMARK  deltaGcompsolvpol: -2898.76
REMARK  deltaGcompsolvnonpol: 355.508
REMARK  deltaGprotsolvpol: -2902.69
REMARK  deltaGprotsolvnonpol: 355.646
REMARK  deltaGligsolvpol: -17.064
REMARK  deltaGligsolvnonpol: 6.6344
REMARK  deltaGvdw: -34.7157
REMARK  deltaGelec: 0.0
REMARK  deltaG: -6.6299458
REMARK  Cluster: 7
REMARK  ClusterRank: 5
ATOM   7134 C    LIG     1       6.071 -13.358  45.677  1.00  0.00      LIG  
ATOM   7135 C1   LIG     1       6.390 -14.775  45.322  1.00  0.00      LIG  
ATOM   7136 O    LIG     1       7.121 -15.475  46.007  1.00  0.00      LIG  
ATOM   7137 N    LIG     1       5.779 -15.163  44.152  1.00  0.00      LIG  
ATOM   7138 C2   LIG     1       5.846 -16.526  43.641  1.00  0.00      LIG  
ATOM   7139 C3   LIG     1       4.543 -17.187  44.022  1.00  0.00      LIG  
ATOM   7140 O1   LIG     1       4.151 -18.215  43.489  1.00  0.00      LIG  
ATOM   7141 C4   LIG     1       6.110 -16.604  42.127  1.00  0.00      LIG  
ATOM   7142 C5   LIG     1       5.449 -15.492  41.298  1.00  0.00      LIG  
ATOM   7143 C6   LIG     1       5.637 -15.708  39.786  1.00  0.00      LIG  
ATOM   7144 C7   LIG     1       4.524 -16.518  39.122  1.00  0.00      LIG  
ATOM   7145 O2   LIG     1       4.436 -17.831  39.656  1.00  0.00      LIG  
ATOM   7146 O3   LIG     1       5.675 -14.439  39.135  1.00  0.00      LIG  
ATOM   7147 O4   LIG     1       4.057 -15.398  41.600  1.00  0.00      LIG  
ATOM   7148 O5   LIG     1       7.522 -16.573  41.919  1.00  0.00      LIG  
ATOM   7149 H    LIG     1       6.395 -13.171  46.704  1.00  0.00      LIG  
ATOM   7150 H1   LIG     1       4.992 -13.189  45.613  1.00  0.00      LIG  
ATOM   7151 H2   LIG     1       6.598 -12.682  44.997  1.00  0.00      LIG  
ATOM   7152 H3   LIG     1       5.145 -14.510  43.700  1.00  0.00      LIG  
ATOM   7153 H4   LIG     1       6.629 -17.060  44.191  1.00  0.00      LIG  
ATOM   7154 H5   LIG     1       4.150 -16.919  45.016  1.00  0.00      LIG  
ATOM   7155 H6   LIG     1       5.777 -17.576  41.755  1.00  0.00      LIG  
ATOM   7156 H7   LIG     1       5.905 -14.535  41.573  1.00  0.00      LIG  
ATOM   7157 H8   LIG     1       6.600 -16.191  39.600  1.00  0.00      LIG  
ATOM   7158 H9   LIG     1       4.703 -16.596  38.046  1.00  0.00      LIG  
ATOM   7159 H10  LIG     1       3.554 -16.026  39.233  1.00  0.00      LIG  
ATOM   7160 H11  LIG     1       5.301 -18.253  39.516  1.00  0.00      LIG  
ATOM   7161 H12  LIG     1       5.111 -13.838  39.657  1.00  0.00      LIG  
ATOM   7162 H13  LIG     1       3.663 -16.259  41.366  1.00  0.00      LIG  
ATOM   7163 H14  LIG     1       7.715 -15.865  41.277  1.00  0.00      LIG  
TER
REMARK  Energy: 2.00727
REMARK  SimpleFitness: 2.00727
REMARK  FullFitness: -2514.4978
REMARK  InterFull: -34.7157
REMARK  IntraFull: 63.4699
REMARK  solvFull: -2898.76
REMARK  surfFull: 355.508
REMARK  extraFull: 0.0
REMARK  deltaGcompsolvpol: -2898.76
REMARK  deltaGcompsolvnonpol: 355.508
REMARK  deltaGprotsolvpol: -2902.69
REMARK  deltaGprotsolvnonpol: 355.646
REMARK  deltaGligsolvpol: -17.064
REMARK  deltaGligsolvnonpol: 6.6344
REMARK  deltaGvdw: -34.7157
REMARK  deltaGelec: 0.0
REMARK  deltaG: -6.6299458
REMARK  Cluster: 7
REMARK  ClusterRank: 6
ATOM   7134 C    LIG     1       6.071 -13.358  45.677  1.00  0.00      LIG  
ATOM   7135 C1   LIG     1       6.390 -14.775  45.322  1.00  0.00      LIG  
ATOM   7136 O    LIG     1       7.121 -15.475  46.007  1.00  0.00      LIG  
ATOM   7137 N    LIG     1       5.779 -15.163  44.152  1.00  0.00      LIG  
ATOM   7138 C2   LIG     1       5.846 -16.526  43.641  1.00  0.00      LIG  
ATOM   7139 C3   LIG     1       4.543 -17.187  44.022  1.00  0.00      LIG  
ATOM   7140 O1   LIG     1       4.151 -18.215  43.489  1.00  0.00      LIG  
ATOM   7141 C4   LIG     1       6.110 -16.604  42.127  1.00  0.00      LIG  
ATOM   7142 C5   LIG     1       5.449 -15.492  41.298  1.00  0.00      LIG  
ATOM   7143 C6   LIG     1       5.637 -15.708  39.786  1.00  0.00      LIG  
ATOM   7144 C7   LIG     1       4.524 -16.518  39.122  1.00  0.00      LIG  
ATOM   7145 O2   LIG     1       4.436 -17.831  39.656  1.00  0.00      LIG  
ATOM   7146 O3   LIG     1       5.675 -14.439  39.135  1.00  0.00      LIG  
ATOM   7147 O4   LIG     1       4.057 -15.398  41.600  1.00  0.00      LIG  
ATOM   7148 O5   LIG     1       7.522 -16.573  41.919  1.00  0.00      LIG  
ATOM   7149 H    LIG     1       6.395 -13.171  46.704  1.00  0.00      LIG  
ATOM   7150 H1   LIG     1       4.992 -13.189  45.613  1.00  0.00      LIG  
ATOM   7151 H2   LIG     1       6.598 -12.682  44.997  1.00  0.00      LIG  
ATOM   7152 H3   LIG     1       5.145 -14.510  43.700  1.00  0.00      LIG  
ATOM   7153 H4   LIG     1       6.629 -17.060  44.191  1.00  0.00      LIG  
ATOM   7154 H5   LIG     1       4.150 -16.919  45.016  1.00  0.00      LIG  
ATOM   7155 H6   LIG     1       5.777 -17.576  41.755  1.00  0.00      LIG  
ATOM   7156 H7   LIG     1       5.905 -14.535  41.573  1.00  0.00      LIG  
ATOM   7157 H8   LIG     1       6.600 -16.191  39.600  1.00  0.00      LIG  
ATOM   7158 H9   LIG     1       4.703 -16.596  38.046  1.00  0.00      LIG  
ATOM   7159 H10  LIG     1       3.554 -16.026  39.233  1.00  0.00      LIG  
ATOM   7160 H11  LIG     1       5.301 -18.253  39.516  1.00  0.00      LIG  
ATOM   7161 H12  LIG     1       5.111 -13.838  39.657  1.00  0.00      LIG  
ATOM   7162 H13  LIG     1       3.663 -16.259  41.366  1.00  0.00      LIG  
ATOM   7163 H14  LIG     1       7.715 -15.865  41.277  1.00  0.00      LIG  
TER
REMARK  Energy: 2.00727
REMARK  SimpleFitness: 2.00727
REMARK  FullFitness: -2514.4978
REMARK  InterFull: -34.7157
REMARK  IntraFull: 63.4699
REMARK  solvFull: -2898.76
REMARK  surfFull: 355.508
REMARK  extraFull: 0.0
REMARK  deltaGcompsolvpol: -2898.76
REMARK  deltaGcompsolvnonpol: 355.508
REMARK  deltaGprotsolvpol: -2902.69
REMARK  deltaGprotsolvnonpol: 355.646
REMARK  deltaGligsolvpol: -17.064
REMARK  deltaGligsolvnonpol: 6.6344
REMARK  deltaGvdw: -34.7157
REMARK  deltaGelec: 0.0
REMARK  deltaG: -6.6299458
REMARK  Cluster: 7
REMARK  ClusterRank: 7
ATOM   7134 C    LIG     1       6.071 -13.358  45.677  1.00  0.00      LIG  
ATOM   7135 C1   LIG     1       6.390 -14.775  45.322  1.00  0.00      LIG  
ATOM   7136 O    LIG     1       7.121 -15.475  46.007  1.00  0.00      LIG  
ATOM   7137 N    LIG     1       5.779 -15.163  44.152  1.00  0.00      LIG  
ATOM   7138 C2   LIG     1       5.846 -16.526  43.641  1.00  0.00      LIG  
ATOM   7139 C3   LIG     1       4.543 -17.187  44.022  1.00  0.00      LIG  
ATOM   7140 O1   LIG     1       4.151 -18.215  43.489  1.00  0.00      LIG  
ATOM   7141 C4   LIG     1       6.110 -16.604  42.127  1.00  0.00      LIG  
ATOM   7142 C5   LIG     1       5.449 -15.492  41.298  1.00  0.00      LIG  
ATOM   7143 C6   LIG     1       5.637 -15.708  39.786  1.00  0.00      LIG  
ATOM   7144 C7   LIG     1       4.524 -16.518  39.122  1.00  0.00      LIG  
ATOM   7145 O2   LIG     1       4.436 -17.831  39.656  1.00  0.00      LIG  
ATOM   7146 O3   LIG     1       5.675 -14.439  39.135  1.00  0.00      LIG  
ATOM   7147 O4   LIG     1       4.057 -15.398  41.600  1.00  0.00      LIG  
ATOM   7148 O5   LIG     1       7.522 -16.573  41.919  1.00  0.00      LIG  
ATOM   7149 H    LIG     1       6.395 -13.171  46.704  1.00  0.00      LIG  
ATOM   7150 H1   LIG     1       4.992 -13.189  45.613  1.00  0.00      LIG  
ATOM   7151 H2   LIG     1       6.598 -12.682  44.997  1.00  0.00      LIG  
ATOM   7152 H3   LIG     1       5.145 -14.510  43.700  1.00  0.00      LIG  
ATOM   7153 H4   LIG     1       6.629 -17.060  44.191  1.00  0.00      LIG  
ATOM   7154 H5   LIG     1       4.150 -16.919  45.016  1.00  0.00      LIG  
ATOM   7155 H6   LIG     1       5.777 -17.576  41.755  1.00  0.00      LIG  
ATOM   7156 H7   LIG     1       5.905 -14.535  41.573  1.00  0.00      LIG  
ATOM   7157 H8   LIG     1       6.600 -16.191  39.600  1.00  0.00      LIG  
ATOM   7158 H9   LIG     1       4.703 -16.596  38.046  1.00  0.00      LIG  
ATOM   7159 H10  LIG     1       3.554 -16.026  39.233  1.00  0.00      LIG  
ATOM   7160 H11  LIG     1       5.301 -18.253  39.516  1.00  0.00      LIG  
ATOM   7161 H12  LIG     1       5.111 -13.838  39.657  1.00  0.00      LIG  
ATOM   7162 H13  LIG     1       3.663 -16.259  41.366  1.00  0.00      LIG  
ATOM   7163 H14  LIG     1       7.715 -15.865  41.277  1.00  0.00      LIG  
TER
REMARK  Energy: 2.35766
REMARK  SimpleFitness: 2.35766
REMARK  FullFitness: -2514.5151
REMARK  InterFull: -20.2797
REMARK  IntraFull: 60.0215
REMARK  solvFull: -2909.96
REMARK  surfFull: 355.703
REMARK  extraFull: 0.0
REMARK  deltaGcompsolvpol: -2909.96
REMARK  deltaGcompsolvnonpol: 355.703
REMARK  deltaGprotsolvpol: -2902.69
REMARK  deltaGprotsolvnonpol: 355.646
REMARK  deltaGligsolvpol: -15.3577
REMARK  deltaGligsolvnonpol: 6.64373
REMARK  deltaGvdw: -20.2797
REMARK  deltaGelec: 0.0
REMARK  deltaG: -6.0365977
REMARK  Cluster: 8
REMARK  ClusterRank: 0
ATOM   7134 C    LIG     1      11.376  -4.258  40.282  1.00  0.00      LIG  
ATOM   7135 C1   LIG     1      11.239  -2.796  40.599  1.00  0.00      LIG  
ATOM   7136 O    LIG     1      10.253  -2.142  40.291  1.00  0.00      LIG  
ATOM   7137 N    LIG     1      12.331  -2.282  41.255  1.00  0.00      LIG  
ATOM   7138 C2   LIG     1      12.367  -0.897  41.693  1.00  0.00      LIG  
ATOM   7139 C3   LIG     1      13.401  -0.855  42.802  1.00  0.00      LIG  
ATOM   7140 O1   LIG     1      13.804  -1.844  43.399  1.00  0.00      LIG  
ATOM   7141 C4   LIG     1      12.631   0.068  40.509  1.00  0.00      LIG  
ATOM   7142 C5   LIG     1      12.101   1.493  40.730  1.00  0.00      LIG  
ATOM   7143 C6   LIG     1      10.571   1.544  40.813  1.00  0.00      LIG  
ATOM   7144 C7   LIG     1      10.048   2.975  40.860  1.00  0.00      LIG  
ATOM   7145 O2   LIG     1      10.306   3.576  42.122  1.00  0.00      LIG  
ATOM   7146 O3   LIG     1      10.015   0.913  39.664  1.00  0.00      LIG  
ATOM   7147 O4   LIG     1      12.672   2.059  41.907  1.00  0.00      LIG  
ATOM   7148 O5   LIG     1      14.021   0.130  40.164  1.00  0.00      LIG  
ATOM   7149 H    LIG     1      11.566  -4.374  39.213  1.00  0.00      LIG  
ATOM   7150 H1   LIG     1      10.445  -4.765  40.548  1.00  0.00      LIG  
ATOM   7151 H2   LIG     1      12.195  -4.716  40.846  1.00  0.00      LIG  
ATOM   7152 H3   LIG     1      13.090  -2.902  41.522  1.00  0.00      LIG  
ATOM   7153 H4   LIG     1      11.396  -0.679  42.144  1.00  0.00      LIG  
ATOM   7154 H5   LIG     1      13.625   0.145  43.199  1.00  0.00      LIG  
ATOM   7155 H6   LIG     1      12.140  -0.325  39.615  1.00  0.00      LIG  
ATOM   7156 H7   LIG     1      12.428   2.116  39.892  1.00  0.00      LIG  
ATOM   7157 H8   LIG     1      10.220   1.019  41.705  1.00  0.00      LIG  
ATOM   7158 H9   LIG     1       8.968   2.998  40.687  1.00  0.00      LIG  
ATOM   7159 H10  LIG     1      10.514   3.580  40.078  1.00  0.00      LIG  
ATOM   7160 H11  LIG     1      11.226   3.344  42.347  1.00  0.00      LIG  
ATOM   7161 H12  LIG     1      10.183  -0.043  39.753  1.00  0.00      LIG  
ATOM   7162 H13  LIG     1      13.637   2.017  41.786  1.00  0.00      LIG  
ATOM   7163 H14  LIG     1      14.321  -0.787  40.042  1.00  0.00      LIG  
TER
REMARK  Energy: 2.35766
REMARK  SimpleFitness: 2.35766
REMARK  FullFitness: -2514.5151
REMARK  InterFull: -20.2797
REMARK  IntraFull: 60.0215
REMARK  solvFull: -2909.96
REMARK  surfFull: 355.703
REMARK  extraFull: 0.0
REMARK  deltaGcompsolvpol: -2909.96
REMARK  deltaGcompsolvnonpol: 355.703
REMARK  deltaGprotsolvpol: -2902.69
REMARK  deltaGprotsolvnonpol: 355.646
REMARK  deltaGligsolvpol: -15.3577
REMARK  deltaGligsolvnonpol: 6.64373
REMARK  deltaGvdw: -20.2797
REMARK  deltaGelec: 0.0
REMARK  deltaG: -6.0365977
REMARK  Cluster: 8
REMARK  ClusterRank: 1
ATOM   7134 C    LIG     1      11.376  -4.258  40.282  1.00  0.00      LIG  
ATOM   7135 C1   LIG     1      11.239  -2.796  40.599  1.00  0.00      LIG  
ATOM   7136 O    LIG     1      10.253  -2.142  40.291  1.00  0.00      LIG  
ATOM   7137 N    LIG     1      12.331  -2.282  41.255  1.00  0.00      LIG  
ATOM   7138 C2   LIG     1      12.367  -0.897  41.693  1.00  0.00      LIG  
ATOM   7139 C3   LIG     1      13.401  -0.855  42.802  1.00  0.00      LIG  
ATOM   7140 O1   LIG     1      13.804  -1.844  43.399  1.00  0.00      LIG  
ATOM   7141 C4   LIG     1      12.631   0.068  40.509  1.00  0.00      LIG  
ATOM   7142 C5   LIG     1      12.101   1.493  40.730  1.00  0.00      LIG  
ATOM   7143 C6   LIG     1      10.571   1.544  40.813  1.00  0.00      LIG  
ATOM   7144 C7   LIG     1      10.048   2.975  40.860  1.00  0.00      LIG  
ATOM   7145 O2   LIG     1      10.306   3.576  42.122  1.00  0.00      LIG  
ATOM   7146 O3   LIG     1      10.015   0.913  39.664  1.00  0.00      LIG  
ATOM   7147 O4   LIG     1      12.672   2.059  41.907  1.00  0.00      LIG  
ATOM   7148 O5   LIG     1      14.021   0.130  40.164  1.00  0.00      LIG  
ATOM   7149 H    LIG     1      11.566  -4.374  39.213  1.00  0.00      LIG  
ATOM   7150 H1   LIG     1      10.445  -4.765  40.548  1.00  0.00      LIG  
ATOM   7151 H2   LIG     1      12.195  -4.716  40.846  1.00  0.00      LIG  
ATOM   7152 H3   LIG     1      13.090  -2.902  41.522  1.00  0.00      LIG  
ATOM   7153 H4   LIG     1      11.396  -0.679  42.144  1.00  0.00      LIG  
ATOM   7154 H5   LIG     1      13.625   0.145  43.199  1.00  0.00      LIG  
ATOM   7155 H6   LIG     1      12.140  -0.325  39.615  1.00  0.00      LIG  
ATOM   7156 H7   LIG     1      12.428   2.116  39.892  1.00  0.00      LIG  
ATOM   7157 H8   LIG     1      10.220   1.019  41.705  1.00  0.00      LIG  
ATOM   7158 H9   LIG     1       8.968   2.998  40.687  1.00  0.00      LIG  
ATOM   7159 H10  LIG     1      10.514   3.580  40.078  1.00  0.00      LIG  
ATOM   7160 H11  LIG     1      11.226   3.344  42.347  1.00  0.00      LIG  
ATOM   7161 H12  LIG     1      10.183  -0.043  39.753  1.00  0.00      LIG  
ATOM   7162 H13  LIG     1      13.637   2.017  41.786  1.00  0.00      LIG  
ATOM   7163 H14  LIG     1      14.321  -0.787  40.042  1.00  0.00      LIG  
TER
REMARK  Energy: 2.35766
REMARK  SimpleFitness: 2.35766
REMARK  FullFitness: -2514.5151
REMARK  InterFull: -20.2797
REMARK  IntraFull: 60.0215
REMARK  solvFull: -2909.96
REMARK  surfFull: 355.703
REMARK  extraFull: 0.0
REMARK  deltaGcompsolvpol: -2909.96
REMARK  deltaGcompsolvnonpol: 355.703
REMARK  deltaGprotsolvpol: -2902.69
REMARK  deltaGprotsolvnonpol: 355.646
REMARK  deltaGligsolvpol: -15.3577
REMARK  deltaGligsolvnonpol: 6.64373
REMARK  deltaGvdw: -20.2797
REMARK  deltaGelec: 0.0
REMARK  deltaG: -6.0365977
REMARK  Cluster: 8
REMARK  ClusterRank: 2
ATOM   7134 C    LIG     1      11.376  -4.258  40.282  1.00  0.00      LIG  
ATOM   7135 C1   LIG     1      11.239  -2.796  40.599  1.00  0.00      LIG  
ATOM   7136 O    LIG     1      10.253  -2.142  40.291  1.00  0.00      LIG  
ATOM   7137 N    LIG     1      12.331  -2.282  41.255  1.00  0.00      LIG  
ATOM   7138 C2   LIG     1      12.367  -0.897  41.693  1.00  0.00      LIG  
ATOM   7139 C3   LIG     1      13.401  -0.855  42.802  1.00  0.00      LIG  
ATOM   7140 O1   LIG     1      13.804  -1.844  43.399  1.00  0.00      LIG  
ATOM   7141 C4   LIG     1      12.631   0.068  40.509  1.00  0.00      LIG  
ATOM   7142 C5   LIG     1      12.101   1.493  40.730  1.00  0.00      LIG  
ATOM   7143 C6   LIG     1      10.571   1.544  40.813  1.00  0.00      LIG  
ATOM   7144 C7   LIG     1      10.048   2.975  40.860  1.00  0.00      LIG  
ATOM   7145 O2   LIG     1      10.306   3.576  42.122  1.00  0.00      LIG  
ATOM   7146 O3   LIG     1      10.015   0.913  39.664  1.00  0.00      LIG  
ATOM   7147 O4   LIG     1      12.672   2.059  41.907  1.00  0.00      LIG  
ATOM   7148 O5   LIG     1      14.021   0.130  40.164  1.00  0.00      LIG  
ATOM   7149 H    LIG     1      11.566  -4.374  39.213  1.00  0.00      LIG  
ATOM   7150 H1   LIG     1      10.445  -4.765  40.548  1.00  0.00      LIG  
ATOM   7151 H2   LIG     1      12.195  -4.716  40.846  1.00  0.00      LIG  
ATOM   7152 H3   LIG     1      13.090  -2.902  41.522  1.00  0.00      LIG  
ATOM   7153 H4   LIG     1      11.396  -0.679  42.144  1.00  0.00      LIG  
ATOM   7154 H5   LIG     1      13.625   0.145  43.199  1.00  0.00      LIG  
ATOM   7155 H6   LIG     1      12.140  -0.325  39.615  1.00  0.00      LIG  
ATOM   7156 H7   LIG     1      12.428   2.116  39.892  1.00  0.00      LIG  
ATOM   7157 H8   LIG     1      10.220   1.019  41.705  1.00  0.00      LIG  
ATOM   7158 H9   LIG     1       8.968   2.998  40.687  1.00  0.00      LIG  
ATOM   7159 H10  LIG     1      10.514   3.580  40.078  1.00  0.00      LIG  
ATOM   7160 H11  LIG     1      11.226   3.344  42.347  1.00  0.00      LIG  
ATOM   7161 H12  LIG     1      10.183  -0.043  39.753  1.00  0.00      LIG  
ATOM   7162 H13  LIG     1      13.637   2.017  41.786  1.00  0.00      LIG  
ATOM   7163 H14  LIG     1      14.321  -0.787  40.042  1.00  0.00      LIG  
TER
REMARK  Energy: 2.35766
REMARK  SimpleFitness: 2.35766
REMARK  FullFitness: -2514.5151
REMARK  InterFull: -20.2797
REMARK  IntraFull: 60.0215
REMARK  solvFull: -2909.96
REMARK  surfFull: 355.703
REMARK  extraFull: 0.0
REMARK  deltaGcompsolvpol: -2909.96
REMARK  deltaGcompsolvnonpol: 355.703
REMARK  deltaGprotsolvpol: -2902.69
REMARK  deltaGprotsolvnonpol: 355.646
REMARK  deltaGligsolvpol: -15.3577
REMARK  deltaGligsolvnonpol: 6.64373
REMARK  deltaGvdw: -20.2797
REMARK  deltaGelec: 0.0
REMARK  deltaG: -6.0365977
REMARK  Cluster: 8
REMARK  ClusterRank: 3
ATOM   7134 C    LIG     1      11.376  -4.258  40.282  1.00  0.00      LIG  
ATOM   7135 C1   LIG     1      11.239  -2.796  40.599  1.00  0.00      LIG  
ATOM   7136 O    LIG     1      10.253  -2.142  40.291  1.00  0.00      LIG  
ATOM   7137 N    LIG     1      12.331  -2.282  41.255  1.00  0.00      LIG  
ATOM   7138 C2   LIG     1      12.367  -0.897  41.693  1.00  0.00      LIG  
ATOM   7139 C3   LIG     1      13.401  -0.855  42.802  1.00  0.00      LIG  
ATOM   7140 O1   LIG     1      13.804  -1.844  43.399  1.00  0.00      LIG  
ATOM   7141 C4   LIG     1      12.631   0.068  40.509  1.00  0.00      LIG  
ATOM   7142 C5   LIG     1      12.101   1.493  40.730  1.00  0.00      LIG  
ATOM   7143 C6   LIG     1      10.571   1.544  40.813  1.00  0.00      LIG  
ATOM   7144 C7   LIG     1      10.048   2.975  40.860  1.00  0.00      LIG  
ATOM   7145 O2   LIG     1      10.306   3.576  42.122  1.00  0.00      LIG  
ATOM   7146 O3   LIG     1      10.015   0.913  39.664  1.00  0.00      LIG  
ATOM   7147 O4   LIG     1      12.672   2.059  41.907  1.00  0.00      LIG  
ATOM   7148 O5   LIG     1      14.021   0.130  40.164  1.00  0.00      LIG  
ATOM   7149 H    LIG     1      11.566  -4.374  39.213  1.00  0.00      LIG  
ATOM   7150 H1   LIG     1      10.445  -4.765  40.548  1.00  0.00      LIG  
ATOM   7151 H2   LIG     1      12.195  -4.716  40.846  1.00  0.00      LIG  
ATOM   7152 H3   LIG     1      13.090  -2.902  41.522  1.00  0.00      LIG  
ATOM   7153 H4   LIG     1      11.396  -0.679  42.144  1.00  0.00      LIG  
ATOM   7154 H5   LIG     1      13.625   0.145  43.199  1.00  0.00      LIG  
ATOM   7155 H6   LIG     1      12.140  -0.325  39.615  1.00  0.00      LIG  
ATOM   7156 H7   LIG     1      12.428   2.116  39.892  1.00  0.00      LIG  
ATOM   7157 H8   LIG     1      10.220   1.019  41.705  1.00  0.00      LIG  
ATOM   7158 H9   LIG     1       8.968   2.998  40.687  1.00  0.00      LIG  
ATOM   7159 H10  LIG     1      10.514   3.580  40.078  1.00  0.00      LIG  
ATOM   7160 H11  LIG     1      11.226   3.344  42.347  1.00  0.00      LIG  
ATOM   7161 H12  LIG     1      10.183  -0.043  39.753  1.00  0.00      LIG  
ATOM   7162 H13  LIG     1      13.637   2.017  41.786  1.00  0.00      LIG  
ATOM   7163 H14  LIG     1      14.321  -0.787  40.042  1.00  0.00      LIG  
TER
REMARK  Energy: 2.37049
REMARK  SimpleFitness: 2.37049
REMARK  FullFitness: -2514.5
REMARK  InterFull: -19.9958
REMARK  IntraFull: 59.8607
REMARK  solvFull: -2910.08
REMARK  surfFull: 355.715
REMARK  extraFull: 0.0
REMARK  deltaGcompsolvpol: -2910.08
REMARK  deltaGcompsolvnonpol: 355.715
REMARK  deltaGprotsolvpol: -2902.69
REMARK  deltaGprotsolvnonpol: 355.646
REMARK  deltaGligsolvpol: -15.2785
REMARK  deltaGligsolvnonpol: 6.63989
REMARK  deltaGvdw: -19.9958
REMARK  deltaGelec: 0.0
REMARK  deltaG: -6.020441
REMARK  Cluster: 8
REMARK  ClusterRank: 4
ATOM   7134 C    LIG     1      11.399  -4.343  40.299  1.00  0.00      LIG  
ATOM   7135 C1   LIG     1      11.271  -2.880  40.612  1.00  0.00      LIG  
ATOM   7136 O    LIG     1      10.291  -2.221  40.295  1.00  0.00      LIG  
ATOM   7137 N    LIG     1      12.358  -2.370  41.278  1.00  0.00      LIG  
ATOM   7138 C2   LIG     1      12.396  -0.982  41.708  1.00  0.00      LIG  
ATOM   7139 C3   LIG     1      13.417  -0.932  42.828  1.00  0.00      LIG  
ATOM   7140 O1   LIG     1      13.813  -1.917  43.437  1.00  0.00      LIG  
ATOM   7141 C4   LIG     1      12.675  -0.027  40.520  1.00  0.00      LIG  
ATOM   7142 C5   LIG     1      12.131   1.396  40.720  1.00  0.00      LIG  
ATOM   7143 C6   LIG     1      10.600   1.440  40.797  1.00  0.00      LIG  
ATOM   7144 C7   LIG     1      10.075   2.870  40.766  1.00  0.00      LIG  
ATOM   7145 O2   LIG     1      10.337   3.541  41.991  1.00  0.00      LIG  
ATOM   7146 O3   LIG     1      10.046   0.748  39.682  1.00  0.00      LIG  
ATOM   7147 O4   LIG     1      12.691   1.983  41.893  1.00  0.00      LIG  
ATOM   7148 O5   LIG     1      14.070   0.044  40.199  1.00  0.00      LIG  
ATOM   7149 H    LIG     1      11.560  -4.465  39.225  1.00  0.00      LIG  
ATOM   7150 H1   LIG     1      10.476  -4.849  40.594  1.00  0.00      LIG  
ATOM   7151 H2   LIG     1      12.235  -4.798  40.840  1.00  0.00      LIG  
ATOM   7152 H3   LIG     1      13.111  -2.992  41.558  1.00  0.00      LIG  
ATOM   7153 H4   LIG     1      11.420  -0.759  42.147  1.00  0.00      LIG  
ATOM   7154 H5   LIG     1      13.638   0.071  43.219  1.00  0.00      LIG  
ATOM   7155 H6   LIG     1      12.202  -0.430  39.620  1.00  0.00      LIG  
ATOM   7156 H7   LIG     1      12.458   2.010  39.875  1.00  0.00      LIG  
ATOM   7157 H8   LIG     1      10.251   0.962  41.716  1.00  0.00      LIG  
ATOM   7158 H9   LIG     1       8.994   2.883  40.594  1.00  0.00      LIG  
ATOM   7159 H10  LIG     1      10.537   3.432  39.949  1.00  0.00      LIG  
ATOM   7160 H11  LIG     1      11.252   3.310  42.235  1.00  0.00      LIG  
ATOM   7161 H12  LIG     1      10.210  -0.203  39.823  1.00  0.00      LIG  
ATOM   7162 H13  LIG     1      13.657   1.937  41.782  1.00  0.00      LIG  
ATOM   7163 H14  LIG     1      14.378  -0.872  40.089  1.00  0.00      LIG  
TER
REMARK  Energy: 2.37049
REMARK  SimpleFitness: 2.37049
REMARK  FullFitness: -2514.5
REMARK  InterFull: -19.9958
REMARK  IntraFull: 59.8607
REMARK  solvFull: -2910.08
REMARK  surfFull: 355.715
REMARK  extraFull: 0.0
REMARK  deltaGcompsolvpol: -2910.08
REMARK  deltaGcompsolvnonpol: 355.715
REMARK  deltaGprotsolvpol: -2902.69
REMARK  deltaGprotsolvnonpol: 355.646
REMARK  deltaGligsolvpol: -15.2785
REMARK  deltaGligsolvnonpol: 6.63989
REMARK  deltaGvdw: -19.9958
REMARK  deltaGelec: 0.0
REMARK  deltaG: -6.020441
REMARK  Cluster: 8
REMARK  ClusterRank: 5
ATOM   7134 C    LIG     1      11.399  -4.343  40.299  1.00  0.00      LIG  
ATOM   7135 C1   LIG     1      11.271  -2.880  40.612  1.00  0.00      LIG  
ATOM   7136 O    LIG     1      10.291  -2.221  40.295  1.00  0.00      LIG  
ATOM   7137 N    LIG     1      12.358  -2.370  41.278  1.00  0.00      LIG  
ATOM   7138 C2   LIG     1      12.396  -0.982  41.708  1.00  0.00      LIG  
ATOM   7139 C3   LIG     1      13.417  -0.932  42.828  1.00  0.00      LIG  
ATOM   7140 O1   LIG     1      13.813  -1.917  43.437  1.00  0.00      LIG  
ATOM   7141 C4   LIG     1      12.675  -0.027  40.520  1.00  0.00      LIG  
ATOM   7142 C5   LIG     1      12.131   1.396  40.720  1.00  0.00      LIG  
ATOM   7143 C6   LIG     1      10.600   1.440  40.797  1.00  0.00      LIG  
ATOM   7144 C7   LIG     1      10.075   2.870  40.766  1.00  0.00      LIG  
ATOM   7145 O2   LIG     1      10.337   3.541  41.991  1.00  0.00      LIG  
ATOM   7146 O3   LIG     1      10.046   0.748  39.682  1.00  0.00      LIG  
ATOM   7147 O4   LIG     1      12.691   1.983  41.893  1.00  0.00      LIG  
ATOM   7148 O5   LIG     1      14.070   0.044  40.199  1.00  0.00      LIG  
ATOM   7149 H    LIG     1      11.560  -4.465  39.225  1.00  0.00      LIG  
ATOM   7150 H1   LIG     1      10.476  -4.849  40.594  1.00  0.00      LIG  
ATOM   7151 H2   LIG     1      12.235  -4.798  40.840  1.00  0.00      LIG  
ATOM   7152 H3   LIG     1      13.111  -2.992  41.558  1.00  0.00      LIG  
ATOM   7153 H4   LIG     1      11.420  -0.759  42.147  1.00  0.00      LIG  
ATOM   7154 H5   LIG     1      13.638   0.071  43.219  1.00  0.00      LIG  
ATOM   7155 H6   LIG     1      12.202  -0.430  39.620  1.00  0.00      LIG  
ATOM   7156 H7   LIG     1      12.458   2.010  39.875  1.00  0.00      LIG  
ATOM   7157 H8   LIG     1      10.251   0.962  41.716  1.00  0.00      LIG  
ATOM   7158 H9   LIG     1       8.994   2.883  40.594  1.00  0.00      LIG  
ATOM   7159 H10  LIG     1      10.537   3.432  39.949  1.00  0.00      LIG  
ATOM   7160 H11  LIG     1      11.252   3.310  42.235  1.00  0.00      LIG  
ATOM   7161 H12  LIG     1      10.210  -0.203  39.823  1.00  0.00      LIG  
ATOM   7162 H13  LIG     1      13.657   1.937  41.782  1.00  0.00      LIG  
ATOM   7163 H14  LIG     1      14.378  -0.872  40.089  1.00  0.00      LIG  
TER
REMARK  Energy: 2.33422
REMARK  SimpleFitness: 2.33422
REMARK  FullFitness: -2514.43
REMARK  InterFull: -20.4293
REMARK  IntraFull: 59.3264
REMARK  solvFull: -2909.1
REMARK  surfFull: 355.773
REMARK  extraFull: 0.0
REMARK  deltaGcompsolvpol: -2909.1
REMARK  deltaGcompsolvnonpol: 355.773
REMARK  deltaGprotsolvpol: -2902.69
REMARK  deltaGprotsolvnonpol: 355.646
REMARK  deltaGligsolvpol: -14.6226
REMARK  deltaGligsolvnonpol: 6.65829
REMARK  deltaGvdw: -20.4293
REMARK  deltaGelec: 0.0
REMARK  deltaG: -6.037869
REMARK  Cluster: 8
REMARK  ClusterRank: 6
ATOM   7134 C    LIG     1      11.424  -4.382  40.290  1.00  0.00      LIG  
ATOM   7135 C1   LIG     1      11.282  -2.921  40.610  1.00  0.00      LIG  
ATOM   7136 O    LIG     1      10.299  -2.269  40.295  1.00  0.00      LIG  
ATOM   7137 N    LIG     1      12.361  -2.404  41.286  1.00  0.00      LIG  
ATOM   7138 C2   LIG     1      12.387  -1.014  41.706  1.00  0.00      LIG  
ATOM   7139 C3   LIG     1      13.393  -0.960  42.836  1.00  0.00      LIG  
ATOM   7140 O1   LIG     1      14.290  -1.777  42.994  1.00  0.00      LIG  
ATOM   7141 C4   LIG     1      12.674  -0.057  40.523  1.00  0.00      LIG  
ATOM   7142 C5   LIG     1      12.144   1.369  40.734  1.00  0.00      LIG  
ATOM   7143 C6   LIG     1      10.614   1.421  40.811  1.00  0.00      LIG  
ATOM   7144 C7   LIG     1      10.093   2.853  40.791  1.00  0.00      LIG  
ATOM   7145 O2   LIG     1      10.365   3.516  42.019  1.00  0.00      LIG  
ATOM   7146 O3   LIG     1      10.056   0.738  39.693  1.00  0.00      LIG  
ATOM   7147 O4   LIG     1      12.709   1.936  41.914  1.00  0.00      LIG  
ATOM   7148 O5   LIG     1      14.068   0.008  40.203  1.00  0.00      LIG  
ATOM   7149 H    LIG     1      11.537  -4.497  39.209  1.00  0.00      LIG  
ATOM   7150 H1   LIG     1      10.526  -4.906  40.627  1.00  0.00      LIG  
ATOM   7151 H2   LIG     1      12.294  -4.822  40.789  1.00  0.00      LIG  
ATOM   7152 H3   LIG     1      13.144  -3.005  41.526  1.00  0.00      LIG  
ATOM   7153 H4   LIG     1      11.404  -0.807  42.137  1.00  0.00      LIG  
ATOM   7154 H5   LIG     1      13.334  -0.067  43.476  1.00  0.00      LIG  
ATOM   7155 H6   LIG     1      12.197  -0.454  39.623  1.00  0.00      LIG  
ATOM   7156 H7   LIG     1      12.477   1.988  39.894  1.00  0.00      LIG  
ATOM   7157 H8   LIG     1      10.264   0.938  41.727  1.00  0.00      LIG  
ATOM   7158 H9   LIG     1       9.011   2.867  40.629  1.00  0.00      LIG  
ATOM   7159 H10  LIG     1      10.550   3.419  39.974  1.00  0.00      LIG  
ATOM   7160 H11  LIG     1      11.282   3.284  42.254  1.00  0.00      LIG  
ATOM   7161 H12  LIG     1      10.225  -0.214  39.822  1.00  0.00      LIG  
ATOM   7162 H13  LIG     1      13.675   1.876  41.805  1.00  0.00      LIG  
ATOM   7163 H14  LIG     1      14.393  -0.909  40.170  1.00  0.00      LIG  
TER
REMARK  Energy: 2.33422
REMARK  SimpleFitness: 2.33422
REMARK  FullFitness: -2514.43
REMARK  InterFull: -20.4293
REMARK  IntraFull: 59.3264
REMARK  solvFull: -2909.1
REMARK  surfFull: 355.773
REMARK  extraFull: 0.0
REMARK  deltaGcompsolvpol: -2909.1
REMARK  deltaGcompsolvnonpol: 355.773
REMARK  deltaGprotsolvpol: -2902.69
REMARK  deltaGprotsolvnonpol: 355.646
REMARK  deltaGligsolvpol: -14.6226
REMARK  deltaGligsolvnonpol: 6.65829
REMARK  deltaGvdw: -20.4293
REMARK  deltaGelec: 0.0
REMARK  deltaG: -6.037869
REMARK  Cluster: 8
REMARK  ClusterRank: 7
ATOM   7134 C    LIG     1      11.424  -4.382  40.290  1.00  0.00      LIG  
ATOM   7135 C1   LIG     1      11.282  -2.921  40.610  1.00  0.00      LIG  
ATOM   7136 O    LIG     1      10.299  -2.269  40.295  1.00  0.00      LIG  
ATOM   7137 N    LIG     1      12.361  -2.404  41.286  1.00  0.00      LIG  
ATOM   7138 C2   LIG     1      12.387  -1.014  41.706  1.00  0.00      LIG  
ATOM   7139 C3   LIG     1      13.393  -0.960  42.836  1.00  0.00      LIG  
ATOM   7140 O1   LIG     1      14.290  -1.777  42.994  1.00  0.00      LIG  
ATOM   7141 C4   LIG     1      12.674  -0.057  40.523  1.00  0.00      LIG  
ATOM   7142 C5   LIG     1      12.144   1.369  40.734  1.00  0.00      LIG  
ATOM   7143 C6   LIG     1      10.614   1.421  40.811  1.00  0.00      LIG  
ATOM   7144 C7   LIG     1      10.093   2.853  40.791  1.00  0.00      LIG  
ATOM   7145 O2   LIG     1      10.365   3.516  42.019  1.00  0.00      LIG  
ATOM   7146 O3   LIG     1      10.056   0.738  39.693  1.00  0.00      LIG  
ATOM   7147 O4   LIG     1      12.709   1.936  41.914  1.00  0.00      LIG  
ATOM   7148 O5   LIG     1      14.068   0.008  40.203  1.00  0.00      LIG  
ATOM   7149 H    LIG     1      11.537  -4.497  39.209  1.00  0.00      LIG  
ATOM   7150 H1   LIG     1      10.526  -4.906  40.627  1.00  0.00      LIG  
ATOM   7151 H2   LIG     1      12.294  -4.822  40.789  1.00  0.00      LIG  
ATOM   7152 H3   LIG     1      13.144  -3.005  41.526  1.00  0.00      LIG  
ATOM   7153 H4   LIG     1      11.404  -0.807  42.137  1.00  0.00      LIG  
ATOM   7154 H5   LIG     1      13.334  -0.067  43.476  1.00  0.00      LIG  
ATOM   7155 H6   LIG     1      12.197  -0.454  39.623  1.00  0.00      LIG  
ATOM   7156 H7   LIG     1      12.477   1.988  39.894  1.00  0.00      LIG  
ATOM   7157 H8   LIG     1      10.264   0.938  41.727  1.00  0.00      LIG  
ATOM   7158 H9   LIG     1       9.011   2.867  40.629  1.00  0.00      LIG  
ATOM   7159 H10  LIG     1      10.550   3.419  39.974  1.00  0.00      LIG  
ATOM   7160 H11  LIG     1      11.282   3.284  42.254  1.00  0.00      LIG  
ATOM   7161 H12  LIG     1      10.225  -0.214  39.822  1.00  0.00      LIG  
ATOM   7162 H13  LIG     1      13.675   1.876  41.805  1.00  0.00      LIG  
ATOM   7163 H14  LIG     1      14.393  -0.909  40.170  1.00  0.00      LIG  
TER
REMARK  Energy: 0.261955
REMARK  SimpleFitness: 0.261955
REMARK  FullFitness: -2514.3188
REMARK  InterFull: -40.0679
REMARK  IntraFull: 64.7401
REMARK  solvFull: -2894.54
REMARK  surfFull: 355.549
REMARK  extraFull: 0.0
REMARK  deltaGcompsolvpol: -2894.54
REMARK  deltaGcompsolvnonpol: 355.549
REMARK  deltaGprotsolvpol: -2902.69
REMARK  deltaGprotsolvnonpol: 355.646
REMARK  deltaGligsolvpol: -19.6747
REMARK  deltaGligsolvnonpol: 6.6325
REMARK  deltaGvdw: -40.0679
REMARK  deltaGelec: 0.0
REMARK  deltaG: -6.714167
REMARK  Cluster: 9
REMARK  ClusterRank: 0
ATOM   7134 C    LIG     1      -1.999  40.613  32.416  1.00  0.00      LIG  
ATOM   7135 C1   LIG     1      -2.016  39.486  33.403  1.00  0.00      LIG  
ATOM   7136 O    LIG     1      -1.512  38.400  33.161  1.00  0.00      LIG  
ATOM   7137 N    LIG     1      -2.687  39.807  34.561  1.00  0.00      LIG  
ATOM   7138 C2   LIG     1      -2.760  38.893  35.694  1.00  0.00      LIG  
ATOM   7139 C3   LIG     1      -1.756  39.393  36.700  1.00  0.00      LIG  
ATOM   7140 O1   LIG     1      -1.364  38.699  37.626  1.00  0.00      LIG  
ATOM   7141 C4   LIG     1      -4.172  38.783  36.300  1.00  0.00      LIG  
ATOM   7142 C5   LIG     1      -4.990  40.088  36.287  1.00  0.00      LIG  
ATOM   7143 C6   LIG     1      -6.368  39.918  36.944  1.00  0.00      LIG  
ATOM   7144 C7   LIG     1      -7.066  41.260  37.157  1.00  0.00      LIG  
ATOM   7145 O2   LIG     1      -8.216  41.096  37.980  1.00  0.00      LIG  
ATOM   7146 O3   LIG     1      -7.204  39.101  36.119  1.00  0.00      LIG  
ATOM   7147 O4   LIG     1      -4.256  41.094  36.981  1.00  0.00      LIG  
ATOM   7148 O5   LIG     1      -4.864  37.755  35.596  1.00  0.00      LIG  
ATOM   7149 H    LIG     1      -2.889  40.554  31.784  1.00  0.00      LIG  
ATOM   7150 H1   LIG     1      -1.102  40.523  31.797  1.00  0.00      LIG  
ATOM   7151 H2   LIG     1      -1.974  41.580  32.928  1.00  0.00      LIG  
ATOM   7152 H3   LIG     1      -3.037  40.753  34.672  1.00  0.00      LIG  
ATOM   7153 H4   LIG     1      -2.407  37.906  35.382  1.00  0.00      LIG  
ATOM   7154 H5   LIG     1      -1.649  40.488  36.768  1.00  0.00      LIG  
ATOM   7155 H6   LIG     1      -4.087  38.439  37.337  1.00  0.00      LIG  
ATOM   7156 H7   LIG     1      -5.137  40.415  35.254  1.00  0.00      LIG  
ATOM   7157 H8   LIG     1      -6.256  39.413  37.908  1.00  0.00      LIG  
ATOM   7158 H9   LIG     1      -7.393  41.690  36.206  1.00  0.00      LIG  
ATOM   7159 H10  LIG     1      -6.416  41.979  37.661  1.00  0.00      LIG  
ATOM   7160 H11  LIG     1      -8.840  40.539  37.487  1.00  0.00      LIG  
ATOM   7161 H12  LIG     1      -7.998  38.886  36.640  1.00  0.00      LIG  
ATOM   7162 H13  LIG     1      -4.812  41.893  36.999  1.00  0.00      LIG  
ATOM   7163 H14  LIG     1      -5.804  37.850  35.843  1.00  0.00      LIG  
TER
REMARK  Energy: 0.341985
REMARK  SimpleFitness: 0.341985
REMARK  FullFitness: -2514.018
REMARK  InterFull: -39.8386
REMARK  IntraFull: 64.7256
REMARK  solvFull: -2894.45
REMARK  surfFull: 355.545
REMARK  extraFull: 0.0
REMARK  deltaGcompsolvpol: -2894.45
REMARK  deltaGcompsolvnonpol: 355.545
REMARK  deltaGprotsolvpol: -2902.69
REMARK  deltaGprotsolvnonpol: 355.646
REMARK  deltaGligsolvpol: -19.701
REMARK  deltaGligsolvnonpol: 6.63544
REMARK  deltaGvdw: -39.8386
REMARK  deltaGelec: 0.0
REMARK  deltaG: -6.6860085
REMARK  Cluster: 9
REMARK  ClusterRank: 1
ATOM   7134 C    LIG     1      -2.041  40.711  32.426  1.00  0.00      LIG  
ATOM   7135 C1   LIG     1      -2.060  39.563  33.392  1.00  0.00      LIG  
ATOM   7136 O    LIG     1      -1.540  38.489  33.137  1.00  0.00      LIG  
ATOM   7137 N    LIG     1      -2.739  39.855  34.554  1.00  0.00      LIG  
ATOM   7138 C2   LIG     1      -2.813  38.917  35.666  1.00  0.00      LIG  
ATOM   7139 C3   LIG     1      -1.811  39.400  36.682  1.00  0.00      LIG  
ATOM   7140 O1   LIG     1      -1.414  38.687  37.590  1.00  0.00      LIG  
ATOM   7141 C4   LIG     1      -4.226  38.793  36.269  1.00  0.00      LIG  
ATOM   7142 C5   LIG     1      -5.062  40.087  36.236  1.00  0.00      LIG  
ATOM   7143 C6   LIG     1      -6.438  39.905  36.895  1.00  0.00      LIG  
ATOM   7144 C7   LIG     1      -7.158  41.239  37.085  1.00  0.00      LIG  
ATOM   7145 O2   LIG     1      -8.302  41.068  37.915  1.00  0.00      LIG  
ATOM   7146 O3   LIG     1      -7.260  39.061  36.084  1.00  0.00      LIG  
ATOM   7147 O4   LIG     1      -4.342  41.112  36.917  1.00  0.00      LIG  
ATOM   7148 O5   LIG     1      -4.901  37.747  35.575  1.00  0.00      LIG  
ATOM   7149 H    LIG     1      -2.767  40.521  31.631  1.00  0.00      LIG  
ATOM   7150 H1   LIG     1      -1.037  40.790  32.000  1.00  0.00      LIG  
ATOM   7151 H2   LIG     1      -2.286  41.656  32.920  1.00  0.00      LIG  
ATOM   7152 H3   LIG     1      -3.088  40.798  34.688  1.00  0.00      LIG  
ATOM   7153 H4   LIG     1      -2.458  37.936  35.334  1.00  0.00      LIG  
ATOM   7154 H5   LIG     1      -1.713  40.494  36.776  1.00  0.00      LIG  
ATOM   7155 H6   LIG     1      -4.142  38.464  37.309  1.00  0.00      LIG  
ATOM   7156 H7   LIG     1      -5.214  40.398  35.198  1.00  0.00      LIG  
ATOM   7157 H8   LIG     1      -6.317  39.419  37.867  1.00  0.00      LIG  
ATOM   7158 H9   LIG     1      -7.496  41.645  36.127  1.00  0.00      LIG  
ATOM   7159 H10  LIG     1      -6.519  41.978  37.573  1.00  0.00      LIG  
ATOM   7160 H11  LIG     1      -8.906  40.468  37.444  1.00  0.00      LIG  
ATOM   7161 H12  LIG     1      -8.054  38.848  36.605  1.00  0.00      LIG  
ATOM   7162 H13  LIG     1      -4.902  41.908  36.907  1.00  0.00      LIG  
ATOM   7163 H14  LIG     1      -5.840  37.817  35.834  1.00  0.00      LIG  
TER
REMARK  Energy: 6.34582
REMARK  SimpleFitness: 6.34582
REMARK  FullFitness: -2505.3877
REMARK  InterFull: -32.5498
REMARK  IntraFull: 69.1232
REMARK  solvFull: -2897.61
REMARK  surfFull: 355.649
REMARK  extraFull: 0.0
REMARK  deltaGcompsolvpol: -2897.61
REMARK  deltaGcompsolvnonpol: 355.649
REMARK  deltaGprotsolvpol: -2902.69
REMARK  deltaGprotsolvnonpol: 355.646
REMARK  deltaGligsolvpol: -22.0867
REMARK  deltaGligsolvnonpol: 6.83529
REMARK  deltaGvdw: -32.5498
REMARK  deltaGelec: 0.0
REMARK  deltaG: -6.0529547
REMARK  Cluster: 9
REMARK  ClusterRank: 2
ATOM   7134 C    LIG     1      -1.949  39.192  33.376  1.00  0.00      LIG  
ATOM   7135 C1   LIG     1      -2.291  39.184  34.835  1.00  0.00      LIG  
ATOM   7136 O    LIG     1      -2.096  38.211  35.547  1.00  0.00      LIG  
ATOM   7137 N    LIG     1      -2.773  40.398  35.269  1.00  0.00      LIG  
ATOM   7138 C2   LIG     1      -3.230  40.594  36.640  1.00  0.00      LIG  
ATOM   7139 C3   LIG     1      -3.085  42.061  36.945  1.00  0.00      LIG  
ATOM   7140 O1   LIG     1      -3.627  42.578  37.911  1.00  0.00      LIG  
ATOM   7141 C4   LIG     1      -4.661  40.081  36.913  1.00  0.00      LIG  
ATOM   7142 C5   LIG     1      -5.611  40.220  35.719  1.00  0.00      LIG  
ATOM   7143 C6   LIG     1      -7.015  39.657  35.975  1.00  0.00      LIG  
ATOM   7144 C7   LIG     1      -7.870  40.599  36.819  1.00  0.00      LIG  
ATOM   7145 O2   LIG     1      -9.129  40.002  37.117  1.00  0.00      LIG  
ATOM   7146 O3   LIG     1      -7.658  39.452  34.714  1.00  0.00      LIG  
ATOM   7147 O4   LIG     1      -5.711  41.590  35.327  1.00  0.00      LIG  
ATOM   7148 O5   LIG     1      -4.551  38.706  37.267  1.00  0.00      LIG  
ATOM   7149 H    LIG     1      -2.006  38.168  32.997  1.00  0.00      LIG  
ATOM   7150 H1   LIG     1      -0.937  39.579  33.236  1.00  0.00      LIG  
ATOM   7151 H2   LIG     1      -2.655  39.812  32.815  1.00  0.00      LIG  
ATOM   7152 H3   LIG     1      -2.908  41.132  34.582  1.00  0.00      LIG  
ATOM   7153 H4   LIG     1      -2.514  40.077  37.288  1.00  0.00      LIG  
ATOM   7154 H5   LIG     1      -2.202  42.551  36.504  1.00  0.00      LIG  
ATOM   7155 H6   LIG     1      -5.085  40.595  37.780  1.00  0.00      LIG  
ATOM   7156 H7   LIG     1      -5.189  39.669  34.882  1.00  0.00      LIG  
ATOM   7157 H8   LIG     1      -6.961  38.673  36.446  1.00  0.00      LIG  
ATOM   7158 H9   LIG     1      -8.077  41.532  36.288  1.00  0.00      LIG  
ATOM   7159 H10  LIG     1      -7.374  40.831  37.764  1.00  0.00      LIG  
ATOM   7160 H11  LIG     1      -8.983  39.048  37.247  1.00  0.00      LIG  
ATOM   7161 H12  LIG     1      -8.600  39.305  34.913  1.00  0.00      LIG  
ATOM   7162 H13  LIG     1      -4.814  41.894  35.114  1.00  0.00      LIG  
ATOM   7163 H14  LIG     1      -5.447  38.362  37.439  1.00  0.00      LIG  
TER
REMARK  Energy: 8.38634
REMARK  SimpleFitness: 8.38634
REMARK  FullFitness: -2502.8464
REMARK  InterFull: -33.065
REMARK  IntraFull: 71.4025
REMARK  solvFull: -2896.63
REMARK  surfFull: 355.446
REMARK  extraFull: 0.0
REMARK  deltaGcompsolvpol: -2896.63
REMARK  deltaGcompsolvnonpol: 355.446
REMARK  deltaGprotsolvpol: -2902.69
REMARK  deltaGprotsolvnonpol: 355.646
REMARK  deltaGligsolvpol: -20.855
REMARK  deltaGligsolvnonpol: 6.69129
REMARK  deltaGvdw: -33.065
REMARK  deltaGelec: 0.0
REMARK  deltaG: -6.1226616
REMARK  Cluster: 9
REMARK  ClusterRank: 3
ATOM   7134 C    LIG     1      -1.771  40.835  32.519  1.00  0.00      LIG  
ATOM   7135 C1   LIG     1      -2.018  39.726  33.496  1.00  0.00      LIG  
ATOM   7136 O    LIG     1      -1.746  38.562  33.244  1.00  0.00      LIG  
ATOM   7137 N    LIG     1      -2.490  40.180  34.709  1.00  0.00      LIG  
ATOM   7138 C2   LIG     1      -2.690  39.281  35.837  1.00  0.00      LIG  
ATOM   7139 C3   LIG     1      -1.521  39.572  36.753  1.00  0.00      LIG  
ATOM   7140 O1   LIG     1      -1.196  38.822  37.661  1.00  0.00      LIG  
ATOM   7141 C4   LIG     1      -3.990  39.493  36.640  1.00  0.00      LIG  
ATOM   7142 C5   LIG     1      -5.277  39.757  35.844  1.00  0.00      LIG  
ATOM   7143 C6   LIG     1      -6.479  39.924  36.786  1.00  0.00      LIG  
ATOM   7144 C7   LIG     1      -6.527  41.309  37.427  1.00  0.00      LIG  
ATOM   7145 O2   LIG     1      -7.439  41.300  38.518  1.00  0.00      LIG  
ATOM   7146 O3   LIG     1      -7.688  39.723  36.050  1.00  0.00      LIG  
ATOM   7147 O4   LIG     1      -5.168  40.941  35.055  1.00  0.00      LIG  
ATOM   7148 O5   LIG     1      -4.181  38.281  37.364  1.00  0.00      LIG  
ATOM   7149 H    LIG     1      -1.981  40.469  31.510  1.00  0.00      LIG  
ATOM   7150 H1   LIG     1      -0.726  41.147  32.590  1.00  0.00      LIG  
ATOM   7151 H2   LIG     1      -2.423  41.691  32.722  1.00  0.00      LIG  
ATOM   7152 H3   LIG     1      -2.558  41.182  34.856  1.00  0.00      LIG  
ATOM   7153 H4   LIG     1      -2.590  38.240  35.509  1.00  0.00      LIG  
ATOM   7154 H5   LIG     1      -1.220  40.631  36.816  1.00  0.00      LIG  
ATOM   7155 H6   LIG     1      -3.854  40.301  37.366  1.00  0.00      LIG  
ATOM   7156 H7   LIG     1      -5.467  38.919  35.167  1.00  0.00      LIG  
ATOM   7157 H8   LIG     1      -6.476  39.167  37.569  1.00  0.00      LIG  
ATOM   7158 H9   LIG     1      -6.868  42.069  36.718  1.00  0.00      LIG  
ATOM   7159 H10  LIG     1      -5.549  41.600  37.819  1.00  0.00      LIG  
ATOM   7160 H11  LIG     1      -8.270  40.932  38.170  1.00  0.00      LIG  
ATOM   7161 H12  LIG     1      -7.724  38.781  35.812  1.00  0.00      LIG  
ATOM   7162 H13  LIG     1      -4.448  40.778  34.420  1.00  0.00      LIG  
ATOM   7163 H14  LIG     1      -5.107  38.246  37.668  1.00  0.00      LIG  
TER
REMARK  Energy: 8.84581
REMARK  SimpleFitness: 8.84581
REMARK  FullFitness: -2501.915
REMARK  InterFull: -27.7415
REMARK  IntraFull: 66.7145
REMARK  solvFull: -2896.74
REMARK  surfFull: 355.852
REMARK  extraFull: 0.0
REMARK  deltaGcompsolvpol: -2896.74
REMARK  deltaGcompsolvnonpol: 355.852
REMARK  deltaGprotsolvpol: -2902.69
REMARK  deltaGprotsolvnonpol: 355.646
REMARK  deltaGligsolvpol: -16.5734
REMARK  deltaGligsolvnonpol: 6.78857
REMARK  deltaGvdw: -27.7415
REMARK  deltaGelec: 0.0
REMARK  deltaG: -5.8586287
REMARK  Cluster: 9
REMARK  ClusterRank: 4
ATOM   7134 C    LIG     1      -1.091  42.304  34.186  1.00  0.00      LIG  
ATOM   7135 C1   LIG     1      -1.871  41.026  34.102  1.00  0.00      LIG  
ATOM   7136 O    LIG     1      -2.224  40.549  33.036  1.00  0.00      LIG  
ATOM   7137 N    LIG     1      -2.075  40.443  35.335  1.00  0.00      LIG  
ATOM   7138 C2   LIG     1      -2.753  39.164  35.476  1.00  0.00      LIG  
ATOM   7139 C3   LIG     1      -1.775  38.336  36.269  1.00  0.00      LIG  
ATOM   7140 O1   LIG     1      -1.448  38.611  37.415  1.00  0.00      LIG  
ATOM   7141 C4   LIG     1      -4.103  39.231  36.217  1.00  0.00      LIG  
ATOM   7142 C5   LIG     1      -4.985  40.396  35.737  1.00  0.00      LIG  
ATOM   7143 C6   LIG     1      -6.480  40.210  36.053  1.00  0.00      LIG  
ATOM   7144 C7   LIG     1      -6.836  40.236  37.541  1.00  0.00      LIG  
ATOM   7145 O2   LIG     1      -6.484  41.456  38.184  1.00  0.00      LIG  
ATOM   7146 O3   LIG     1      -7.237  41.209  35.368  1.00  0.00      LIG  
ATOM   7147 O4   LIG     1      -4.504  41.622  36.291  1.00  0.00      LIG  
ATOM   7148 O5   LIG     1      -4.765  37.988  35.969  1.00  0.00      LIG  
ATOM   7149 H    LIG     1      -1.460  42.989  33.419  1.00  0.00      LIG  
ATOM   7150 H1   LIG     1      -0.033  42.089  34.013  1.00  0.00      LIG  
ATOM   7151 H2   LIG     1      -1.213  42.777  35.166  1.00  0.00      LIG  
ATOM   7152 H3   LIG     1      -1.668  40.874  36.158  1.00  0.00      LIG  
ATOM   7153 H4   LIG     1      -2.872  38.683  34.499  1.00  0.00      LIG  
ATOM   7154 H5   LIG     1      -1.167  37.638  35.673  1.00  0.00      LIG  
ATOM   7155 H6   LIG     1      -3.942  39.315  37.297  1.00  0.00      LIG  
ATOM   7156 H7   LIG     1      -4.884  40.496  34.655  1.00  0.00      LIG  
ATOM   7157 H8   LIG     1      -6.819  39.256  35.642  1.00  0.00      LIG  
ATOM   7158 H9   LIG     1      -6.327  39.426  38.068  1.00  0.00      LIG  
ATOM   7159 H10  LIG     1      -7.914  40.108  37.668  1.00  0.00      LIG  
ATOM   7160 H11  LIG     1      -5.651  41.749  37.769  1.00  0.00      LIG  
ATOM   7161 H12  LIG     1      -7.006  42.058  35.784  1.00  0.00      LIG  
ATOM   7162 H13  LIG     1      -3.587  41.717  35.978  1.00  0.00      LIG  
ATOM   7163 H14  LIG     1      -5.468  37.897  36.639  1.00  0.00      LIG  
TER
REMARK  Energy: 11.2779
REMARK  SimpleFitness: 11.2779
REMARK  FullFitness: -2496.7537
REMARK  InterFull: -20.0393
REMARK  IntraFull: 70.1836
REMARK  solvFull: -2902.38
REMARK  surfFull: 355.482
REMARK  extraFull: 0.0
REMARK  deltaGcompsolvpol: -2902.38
REMARK  deltaGcompsolvnonpol: 355.482
REMARK  deltaGprotsolvpol: -2902.69
REMARK  deltaGprotsolvnonpol: 355.646
REMARK  deltaGligsolvpol: -20.7974
REMARK  deltaGligsolvnonpol: 6.83344
REMARK  deltaGvdw: -20.0393
REMARK  deltaGelec: 0.0
REMARK  deltaG: -5.2558994
REMARK  Cluster: 9
REMARK  ClusterRank: 5
ATOM   7134 C    LIG     1      -1.804  40.647  32.350  1.00  0.00      LIG  
ATOM   7135 C1   LIG     1      -2.062  40.500  33.817  1.00  0.00      LIG  
ATOM   7136 O    LIG     1      -1.617  41.289  34.636  1.00  0.00      LIG  
ATOM   7137 N    LIG     1      -2.745  39.334  34.106  1.00  0.00      LIG  
ATOM   7138 C2   LIG     1      -3.118  38.902  35.450  1.00  0.00      LIG  
ATOM   7139 C3   LIG     1      -1.839  38.416  36.104  1.00  0.00      LIG  
ATOM   7140 O1   LIG     1      -1.698  38.299  37.312  1.00  0.00      LIG  
ATOM   7141 C4   LIG     1      -3.893  39.939  36.283  1.00  0.00      LIG  
ATOM   7142 C5   LIG     1      -5.118  40.551  35.574  1.00  0.00      LIG  
ATOM   7143 C6   LIG     1      -6.418  39.724  35.703  1.00  0.00      LIG  
ATOM   7144 C7   LIG     1      -7.572  40.323  34.904  1.00  0.00      LIG  
ATOM   7145 O2   LIG     1      -8.027  41.546  35.465  1.00  0.00      LIG  
ATOM   7146 O3   LIG     1      -6.224  38.386  35.244  1.00  0.00      LIG  
ATOM   7147 O4   LIG     1      -5.334  41.842  36.142  1.00  0.00      LIG  
ATOM   7148 O5   LIG     1      -4.372  39.317  37.468  1.00  0.00      LIG  
ATOM   7149 H    LIG     1      -1.399  41.644  32.160  1.00  0.00      LIG  
ATOM   7150 H1   LIG     1      -2.737  40.533  31.790  1.00  0.00      LIG  
ATOM   7151 H2   LIG     1      -1.080  39.894  32.025  1.00  0.00      LIG  
ATOM   7152 H3   LIG     1      -3.074  38.777  33.322  1.00  0.00      LIG  
ATOM   7153 H4   LIG     1      -3.724  38.004  35.321  1.00  0.00      LIG  
ATOM   7154 H5   LIG     1      -1.170  37.845  35.442  1.00  0.00      LIG  
ATOM   7155 H6   LIG     1      -3.206  40.730  36.602  1.00  0.00      LIG  
ATOM   7156 H7   LIG     1      -4.892  40.723  34.522  1.00  0.00      LIG  
ATOM   7157 H8   LIG     1      -6.728  39.688  36.751  1.00  0.00      LIG  
ATOM   7158 H9   LIG     1      -8.417  39.628  34.870  1.00  0.00      LIG  
ATOM   7159 H10  LIG     1      -7.271  40.509  33.871  1.00  0.00      LIG  
ATOM   7160 H11  LIG     1      -7.225  42.035  35.730  1.00  0.00      LIG  
ATOM   7161 H12  LIG     1      -5.770  38.435  34.385  1.00  0.00      LIG  
ATOM   7162 H13  LIG     1      -4.487  42.316  36.078  1.00  0.00      LIG  
ATOM   7163 H14  LIG     1      -5.022  39.927  37.856  1.00  0.00      LIG  
TER
REMARK  Energy: 6.83654
REMARK  SimpleFitness: 6.83654
REMARK  FullFitness: -2514.3076
REMARK  InterFull: -20.888
REMARK  IntraFull: 59.3082
REMARK  solvFull: -2908.89
REMARK  surfFull: 356.162
REMARK  extraFull: 0.0
REMARK  deltaGcompsolvpol: -2908.89
REMARK  deltaGcompsolvnonpol: 356.162
REMARK  deltaGprotsolvpol: -2902.69
REMARK  deltaGprotsolvnonpol: 355.646
REMARK  deltaGligsolvpol: -15.1075
REMARK  deltaGligsolvnonpol: 6.44101
REMARK  deltaGvdw: -20.888
REMARK  deltaGelec: 0.0
REMARK  deltaG: -5.9813695
REMARK  Cluster: 10
REMARK  ClusterRank: 0
ATOM   7134 C    LIG     1      25.775  -0.091  20.233  1.00  0.00      LIG  
ATOM   7135 C1   LIG     1      25.126  -0.846  19.111  1.00  0.00      LIG  
ATOM   7136 O    LIG     1      25.394  -0.623  17.941  1.00  0.00      LIG  
ATOM   7137 N    LIG     1      24.187  -1.758  19.544  1.00  0.00      LIG  
ATOM   7138 C2   LIG     1      23.417  -2.591  18.627  1.00  0.00      LIG  
ATOM   7139 C3   LIG     1      24.089  -3.949  18.625  1.00  0.00      LIG  
ATOM   7140 O1   LIG     1      23.571  -4.944  18.140  1.00  0.00      LIG  
ATOM   7141 C4   LIG     1      21.926  -2.620  19.023  1.00  0.00      LIG  
ATOM   7142 C5   LIG     1      21.001  -3.228  17.959  1.00  0.00      LIG  
ATOM   7143 C6   LIG     1      19.551  -2.787  18.187  1.00  0.00      LIG  
ATOM   7144 C7   LIG     1      18.636  -3.194  17.039  1.00  0.00      LIG  
ATOM   7145 O2   LIG     1      18.799  -4.575  16.741  1.00  0.00      LIG  
ATOM   7146 O3   LIG     1      19.043  -3.345  19.398  1.00  0.00      LIG  
ATOM   7147 O4   LIG     1      21.403  -2.804  16.659  1.00  0.00      LIG  
ATOM   7148 O5   LIG     1      21.729  -3.278  20.279  1.00  0.00      LIG  
ATOM   7149 H    LIG     1      25.482   0.960  20.165  1.00  0.00      LIG  
ATOM   7150 H1   LIG     1      26.861  -0.180  20.137  1.00  0.00      LIG  
ATOM   7151 H2   LIG     1      25.475  -0.481  21.211  1.00  0.00      LIG  
ATOM   7152 H3   LIG     1      24.076  -1.907  20.542  1.00  0.00      LIG  
ATOM   7153 H4   LIG     1      23.542  -2.176  17.624  1.00  0.00      LIG  
ATOM   7154 H5   LIG     1      25.186  -3.928  18.731  1.00  0.00      LIG  
ATOM   7155 H6   LIG     1      21.614  -1.584  19.176  1.00  0.00      LIG  
ATOM   7156 H7   LIG     1      21.058  -4.319  18.004  1.00  0.00      LIG  
ATOM   7157 H8   LIG     1      19.507  -1.699  18.285  1.00  0.00      LIG  
ATOM   7158 H9   LIG     1      18.866  -2.627  16.134  1.00  0.00      LIG  
ATOM   7159 H10  LIG     1      17.588  -3.032  17.304  1.00  0.00      LIG  
ATOM   7160 H11  LIG     1      17.921  -4.894  16.459  1.00  0.00      LIG  
ATOM   7161 H12  LIG     1      18.859  -4.282  19.206  1.00  0.00      LIG  
ATOM   7162 H13  LIG     1      22.249  -3.243  16.468  1.00  0.00      LIG  
ATOM   7163 H14  LIG     1      20.764  -3.357  20.395  1.00  0.00      LIG  
TER
REMARK  Energy: 11.74
REMARK  SimpleFitness: 11.74
REMARK  FullFitness: -2507.0762
REMARK  InterFull: -28.3472
REMARK  IntraFull: 70.352
REMARK  solvFull: -2905.02
REMARK  surfFull: 355.939
REMARK  extraFull: 0.0
REMARK  deltaGcompsolvpol: -2905.02
REMARK  deltaGcompsolvnonpol: 355.939
REMARK  deltaGprotsolvpol: -2902.69
REMARK  deltaGprotsolvnonpol: 355.646
REMARK  deltaGligsolvpol: -18.4382
REMARK  deltaGligsolvnonpol: 6.98692
REMARK  deltaGvdw: -28.3472
REMARK  deltaGelec: 0.0
REMARK  deltaG: -6.319073
REMARK  Cluster: 10
REMARK  ClusterRank: 1
ATOM   7134 C    LIG     1      24.558  -3.542  16.573  1.00  0.00      LIG  
ATOM   7135 C1   LIG     1      23.657  -2.956  17.620  1.00  0.00      LIG  
ATOM   7136 O    LIG     1      23.644  -1.758  17.850  1.00  0.00      LIG  
ATOM   7137 N    LIG     1      22.961  -3.920  18.330  1.00  0.00      LIG  
ATOM   7138 C2   LIG     1      22.088  -3.648  19.471  1.00  0.00      LIG  
ATOM   7139 C3   LIG     1      22.964  -3.258  20.648  1.00  0.00      LIG  
ATOM   7140 O1   LIG     1      24.109  -3.659  20.804  1.00  0.00      LIG  
ATOM   7141 C4   LIG     1      20.979  -2.613  19.201  1.00  0.00      LIG  
ATOM   7142 C5   LIG     1      20.130  -2.950  17.957  1.00  0.00      LIG  
ATOM   7143 C6   LIG     1      19.416  -4.319  17.982  1.00  0.00      LIG  
ATOM   7144 C7   LIG     1      18.296  -4.528  19.011  1.00  0.00      LIG  
ATOM   7145 O2   LIG     1      17.216  -3.614  18.859  1.00  0.00      LIG  
ATOM   7146 O3   LIG     1      18.897  -4.575  16.675  1.00  0.00      LIG  
ATOM   7147 O4   LIG     1      19.201  -1.889  17.718  1.00  0.00      LIG  
ATOM   7148 O5   LIG     1      20.139  -2.488  20.350  1.00  0.00      LIG  
ATOM   7149 H    LIG     1      25.597  -3.362  16.861  1.00  0.00      LIG  
ATOM   7150 H1   LIG     1      24.349  -3.058  15.615  1.00  0.00      LIG  
ATOM   7151 H2   LIG     1      24.405  -4.620  16.466  1.00  0.00      LIG  
ATOM   7152 H3   LIG     1      23.135  -4.889  18.088  1.00  0.00      LIG  
ATOM   7153 H4   LIG     1      21.627  -4.597  19.759  1.00  0.00      LIG  
ATOM   7154 H5   LIG     1      22.428  -2.813  21.500  1.00  0.00      LIG  
ATOM   7155 H6   LIG     1      21.428  -1.627  19.064  1.00  0.00      LIG  
ATOM   7156 H7   LIG     1      20.792  -2.943  17.087  1.00  0.00      LIG  
ATOM   7157 H8   LIG     1      20.165  -5.095  18.156  1.00  0.00      LIG  
ATOM   7158 H9   LIG     1      18.671  -4.448  20.033  1.00  0.00      LIG  
ATOM   7159 H10  LIG     1      17.878  -5.531  18.901  1.00  0.00      LIG  
ATOM   7160 H11  LIG     1      16.908  -3.703  17.940  1.00  0.00      LIG  
ATOM   7161 H12  LIG     1      18.089  -5.110  16.789  1.00  0.00      LIG  
ATOM   7162 H13  LIG     1      18.681  -2.149  16.937  1.00  0.00      LIG  
ATOM   7163 H14  LIG     1      19.364  -1.973  20.060  1.00  0.00      LIG  
TER
REMARK  Energy: 11.8293
REMARK  SimpleFitness: 11.8293
REMARK  FullFitness: -2506.1348
REMARK  InterFull: -19.7908
REMARK  IntraFull: 65.675
REMARK  solvFull: -2907.73
REMARK  surfFull: 355.711
REMARK  extraFull: 0.0
REMARK  deltaGcompsolvpol: -2907.73
REMARK  deltaGcompsolvnonpol: 355.711
REMARK  deltaGprotsolvpol: -2902.69
REMARK  deltaGprotsolvnonpol: 355.646
REMARK  deltaGligsolvpol: -17.2765
REMARK  deltaGligsolvnonpol: 6.45898
REMARK  deltaGvdw: -19.7908
REMARK  deltaGelec: 0.0
REMARK  deltaG: -5.718209
REMARK  Cluster: 10
REMARK  ClusterRank: 2
ATOM   7134 C    LIG     1      25.454  -0.792  17.749  1.00  0.00      LIG  
ATOM   7135 C1   LIG     1      24.394  -1.692  17.185  1.00  0.00      LIG  
ATOM   7136 O    LIG     1      24.244  -1.839  15.981  1.00  0.00      LIG  
ATOM   7137 N    LIG     1      23.664  -2.336  18.158  1.00  0.00      LIG  
ATOM   7138 C2   LIG     1      22.656  -3.340  17.842  1.00  0.00      LIG  
ATOM   7139 C3   LIG     1      23.224  -4.674  18.285  1.00  0.00      LIG  
ATOM   7140 O1   LIG     1      24.420  -4.933  18.317  1.00  0.00      LIG  
ATOM   7141 C4   LIG     1      21.302  -3.018  18.509  1.00  0.00      LIG  
ATOM   7142 C5   LIG     1      20.160  -3.852  17.900  1.00  0.00      LIG  
ATOM   7143 C6   LIG     1      18.765  -3.644  18.515  1.00  0.00      LIG  
ATOM   7144 C7   LIG     1      18.359  -4.793  19.429  1.00  0.00      LIG  
ATOM   7145 O2   LIG     1      19.375  -5.112  20.373  1.00  0.00      LIG  
ATOM   7146 O3   LIG     1      18.692  -2.415  19.232  1.00  0.00      LIG  
ATOM   7147 O4   LIG     1      20.073  -3.518  16.517  1.00  0.00      LIG  
ATOM   7148 O5   LIG     1      21.372  -3.167  19.932  1.00  0.00      LIG  
ATOM   7149 H    LIG     1      25.444   0.150  17.194  1.00  0.00      LIG  
ATOM   7150 H1   LIG     1      26.427  -1.277  17.640  1.00  0.00      LIG  
ATOM   7151 H2   LIG     1      25.274  -0.575  18.807  1.00  0.00      LIG  
ATOM   7152 H3   LIG     1      23.920  -2.196  19.130  1.00  0.00      LIG  
ATOM   7153 H4   LIG     1      22.528  -3.393  16.758  1.00  0.00      LIG  
ATOM   7154 H5   LIG     1      22.494  -5.494  18.346  1.00  0.00      LIG  
ATOM   7155 H6   LIG     1      21.089  -1.965  18.318  1.00  0.00      LIG  
ATOM   7156 H7   LIG     1      20.402  -4.917  17.944  1.00  0.00      LIG  
ATOM   7157 H8   LIG     1      18.005  -3.577  17.731  1.00  0.00      LIG  
ATOM   7158 H9   LIG     1      18.181  -5.691  18.833  1.00  0.00      LIG  
ATOM   7159 H10  LIG     1      17.450  -4.545  19.985  1.00  0.00      LIG  
ATOM   7160 H11  LIG     1      19.060  -5.896  20.859  1.00  0.00      LIG  
ATOM   7161 H12  LIG     1      19.392  -2.448  19.909  1.00  0.00      LIG  
ATOM   7162 H13  LIG     1      19.715  -2.613  16.466  1.00  0.00      LIG  
ATOM   7163 H14  LIG     1      20.864  -3.968  20.163  1.00  0.00      LIG  
TER
REMARK  Energy: 12.5368
REMARK  SimpleFitness: 12.5368
REMARK  FullFitness: -2506.1013
REMARK  InterFull: -27.9267
REMARK  IntraFull: 71.2783
REMARK  solvFull: -2905.45
REMARK  surfFull: 355.997
REMARK  extraFull: 0.0
REMARK  deltaGcompsolvpol: -2905.45
REMARK  deltaGcompsolvnonpol: 355.997
REMARK  deltaGprotsolvpol: -2902.69
REMARK  deltaGprotsolvnonpol: 355.646
REMARK  deltaGligsolvpol: -18.9194
REMARK  deltaGligsolvnonpol: 6.96433
REMARK  deltaGvdw: -27.9267
REMARK  deltaGelec: 0.0
REMARK  deltaG: -6.268531
REMARK  Cluster: 10
REMARK  ClusterRank: 3
ATOM   7134 C    LIG     1      24.430  -3.037  16.528  1.00  0.00      LIG  
ATOM   7135 C1   LIG     1      23.693  -2.725  17.794  1.00  0.00      LIG  
ATOM   7136 O    LIG     1      23.772  -1.632  18.329  1.00  0.00      LIG  
ATOM   7137 N    LIG     1      23.028  -3.824  18.312  1.00  0.00      LIG  
ATOM   7138 C2   LIG     1      22.183  -3.786  19.504  1.00  0.00      LIG  
ATOM   7139 C3   LIG     1      23.059  -3.590  20.731  1.00  0.00      LIG  
ATOM   7140 O1   LIG     1      24.206  -4.002  20.814  1.00  0.00      LIG  
ATOM   7141 C4   LIG     1      21.037  -2.758  19.412  1.00  0.00      LIG  
ATOM   7142 C5   LIG     1      20.143  -3.000  18.176  1.00  0.00      LIG  
ATOM   7143 C6   LIG     1      19.412  -4.359  18.124  1.00  0.00      LIG  
ATOM   7144 C7   LIG     1      18.261  -4.592  19.115  1.00  0.00      LIG  
ATOM   7145 O2   LIG     1      17.168  -3.695  18.939  1.00  0.00      LIG  
ATOM   7146 O3   LIG     1      18.920  -4.550  16.794  1.00  0.00      LIG  
ATOM   7147 O4   LIG     1      19.219  -1.919  18.050  1.00  0.00      LIG  
ATOM   7148 O5   LIG     1      20.249  -2.776  20.602  1.00  0.00      LIG  
ATOM   7149 H    LIG     1      25.445  -3.363  16.769  1.00  0.00      LIG  
ATOM   7150 H1   LIG     1      24.466  -2.131  15.917  1.00  0.00      LIG  
ATOM   7151 H2   LIG     1      23.918  -3.818  15.958  1.00  0.00      LIG  
ATOM   7152 H3   LIG     1      23.085  -4.693  17.792  1.00  0.00      LIG  
ATOM   7153 H4   LIG     1      21.756  -4.783  19.631  1.00  0.00      LIG  
ATOM   7154 H5   LIG     1      22.513  -3.330  21.651  1.00  0.00      LIG  
ATOM   7155 H6   LIG     1      21.452  -1.747  19.356  1.00  0.00      LIG  
ATOM   7156 H7   LIG     1      20.775  -2.929  17.288  1.00  0.00      LIG  
ATOM   7157 H8   LIG     1      20.142  -5.156  18.278  1.00  0.00      LIG  
ATOM   7158 H9   LIG     1      18.603  -4.517  20.147  1.00  0.00      LIG  
ATOM   7159 H10  LIG     1      17.863  -5.601  18.983  1.00  0.00      LIG  
ATOM   7160 H11  LIG     1      16.838  -3.837  18.034  1.00  0.00      LIG  
ATOM   7161 H12  LIG     1      18.139  -5.129  16.861  1.00  0.00      LIG  
ATOM   7162 H13  LIG     1      18.645  -2.137  17.296  1.00  0.00      LIG  
ATOM   7163 H14  LIG     1      19.491  -2.190  20.428  1.00  0.00      LIG  
TER
REMARK  Energy: 13.9622
REMARK  SimpleFitness: 13.9622
REMARK  FullFitness: -2504.0474
REMARK  InterFull: -22.5077
REMARK  IntraFull: 69.7523
REMARK  solvFull: -2907.16
REMARK  surfFull: 355.868
REMARK  extraFull: 0.0
REMARK  deltaGcompsolvpol: -2907.16
REMARK  deltaGcompsolvnonpol: 355.868
REMARK  deltaGprotsolvpol: -2902.69
REMARK  deltaGprotsolvnonpol: 355.646
REMARK  deltaGligsolvpol: -16.9949
REMARK  deltaGligsolvnonpol: 6.85034
REMARK  deltaGvdw: -22.5077
REMARK  deltaGelec: 0.0
REMARK  deltaG: -5.979742
REMARK  Cluster: 10
REMARK  ClusterRank: 4
ATOM   7134 C    LIG     1      23.739  -3.078  16.622  1.00  0.00      LIG  
ATOM   7135 C1   LIG     1      23.696  -2.421  17.970  1.00  0.00      LIG  
ATOM   7136 O    LIG     1      24.233  -1.342  18.159  1.00  0.00      LIG  
ATOM   7137 N    LIG     1      22.997  -3.084  18.961  1.00  0.00      LIG  
ATOM   7138 C2   LIG     1      22.459  -4.441  18.914  1.00  0.00      LIG  
ATOM   7139 C3   LIG     1      23.209  -5.173  20.004  1.00  0.00      LIG  
ATOM   7140 O1   LIG     1      23.612  -4.646  21.033  1.00  0.00      LIG  
ATOM   7141 C4   LIG     1      20.944  -4.539  19.177  1.00  0.00      LIG  
ATOM   7142 C5   LIG     1      20.132  -3.588  18.282  1.00  0.00      LIG  
ATOM   7143 C6   LIG     1      18.657  -3.980  18.080  1.00  0.00      LIG  
ATOM   7144 C7   LIG     1      17.743  -3.653  19.260  1.00  0.00      LIG  
ATOM   7145 O2   LIG     1      18.076  -4.402  20.419  1.00  0.00      LIG  
ATOM   7146 O3   LIG     1      18.157  -3.269  16.950  1.00  0.00      LIG  
ATOM   7147 O4   LIG     1      20.181  -2.270  18.824  1.00  0.00      LIG  
ATOM   7148 O5   LIG     1      20.543  -5.886  18.917  1.00  0.00      LIG  
ATOM   7149 H    LIG     1      24.234  -2.402  15.920  1.00  0.00      LIG  
ATOM   7150 H1   LIG     1      22.723  -3.272  16.266  1.00  0.00      LIG  
ATOM   7151 H2   LIG     1      24.306  -4.010  16.680  1.00  0.00      LIG  
ATOM   7152 H3   LIG     1      22.978  -2.623  19.865  1.00  0.00      LIG  
ATOM   7153 H4   LIG     1      22.720  -4.941  17.980  1.00  0.00      LIG  
ATOM   7154 H5   LIG     1      23.198  -6.270  19.914  1.00  0.00      LIG  
ATOM   7155 H6   LIG     1      20.740  -4.325  20.231  1.00  0.00      LIG  
ATOM   7156 H7   LIG     1      20.615  -3.546  17.301  1.00  0.00      LIG  
ATOM   7157 H8   LIG     1      18.584  -5.041  17.836  1.00  0.00      LIG  
ATOM   7158 H9   LIG     1      16.705  -3.879  18.999  1.00  0.00      LIG  
ATOM   7159 H10  LIG     1      17.773  -2.591  19.513  1.00  0.00      LIG  
ATOM   7160 H11  LIG     1      18.929  -4.059  20.736  1.00  0.00      LIG  
ATOM   7161 H12  LIG     1      17.243  -3.575  16.808  1.00  0.00      LIG  
ATOM   7162 H13  LIG     1      19.634  -1.719  18.237  1.00  0.00      LIG  
ATOM   7163 H14  LIG     1      19.614  -5.964  19.199  1.00  0.00      LIG  
TER
REMARK  Energy: 14.0741
REMARK  SimpleFitness: 14.0741
REMARK  FullFitness: -2503.4224
REMARK  InterFull: -16.5932
REMARK  IntraFull: 70.2237
REMARK  solvFull: -2913.03
REMARK  surfFull: 355.977
REMARK  extraFull: 0.0
REMARK  deltaGcompsolvpol: -2913.03
REMARK  deltaGcompsolvnonpol: 355.977
REMARK  deltaGprotsolvpol: -2902.69
REMARK  deltaGprotsolvnonpol: 355.646
REMARK  deltaGligsolvpol: -19.3436
REMARK  deltaGligsolvnonpol: 6.77272
REMARK  deltaGvdw: -16.5932
REMARK  deltaGelec: 0.0
REMARK  deltaG: -5.618089
REMARK  Cluster: 10
REMARK  ClusterRank: 5
ATOM   7134 C    LIG     1      24.233  -2.842  15.584  1.00  0.00      LIG  
ATOM   7135 C1   LIG     1      24.140  -1.935  16.774  1.00  0.00      LIG  
ATOM   7136 O    LIG     1      24.558  -0.790  16.721  1.00  0.00      LIG  
ATOM   7137 N    LIG     1      23.564  -2.465  17.917  1.00  0.00      LIG  
ATOM   7138 C2   LIG     1      23.179  -3.858  18.143  1.00  0.00      LIG  
ATOM   7139 C3   LIG     1      24.416  -4.484  18.761  1.00  0.00      LIG  
ATOM   7140 O1   LIG     1      24.389  -5.534  19.386  1.00  0.00      LIG  
ATOM   7141 C4   LIG     1      21.971  -4.005  19.086  1.00  0.00      LIG  
ATOM   7142 C5   LIG     1      20.780  -3.075  18.773  1.00  0.00      LIG  
ATOM   7143 C6   LIG     1      19.961  -3.487  17.532  1.00  0.00      LIG  
ATOM   7144 C7   LIG     1      18.611  -2.781  17.447  1.00  0.00      LIG  
ATOM   7145 O2   LIG     1      17.676  -3.361  18.349  1.00  0.00      LIG  
ATOM   7146 O3   LIG     1      20.692  -3.161  16.354  1.00  0.00      LIG  
ATOM   7147 O4   LIG     1      19.941  -3.060  19.929  1.00  0.00      LIG  
ATOM   7148 O5   LIG     1      21.506  -5.357  19.043  1.00  0.00      LIG  
ATOM   7149 H    LIG     1      24.700  -2.293  14.762  1.00  0.00      LIG  
ATOM   7150 H1   LIG     1      23.232  -3.154  15.275  1.00  0.00      LIG  
ATOM   7151 H2   LIG     1      24.847  -3.715  15.821  1.00  0.00      LIG  
ATOM   7152 H3   LIG     1      23.552  -1.846  18.721  1.00  0.00      LIG  
ATOM   7153 H4   LIG     1      23.003  -4.368  17.196  1.00  0.00      LIG  
ATOM   7154 H5   LIG     1      25.375  -4.162  18.324  1.00  0.00      LIG  
ATOM   7155 H6   LIG     1      22.294  -3.823  20.117  1.00  0.00      LIG  
ATOM   7156 H7   LIG     1      21.143  -2.052  18.646  1.00  0.00      LIG  
ATOM   7157 H8   LIG     1      19.781  -4.565  17.534  1.00  0.00      LIG  
ATOM   7158 H9   LIG     1      18.195  -2.853  16.438  1.00  0.00      LIG  
ATOM   7159 H10  LIG     1      18.716  -1.718  17.680  1.00  0.00      LIG  
ATOM   7160 H11  LIG     1      18.142  -3.432  19.202  1.00  0.00      LIG  
ATOM   7161 H12  LIG     1      20.663  -2.194  16.260  1.00  0.00      LIG  
ATOM   7162 H13  LIG     1      20.513  -2.863  20.691  1.00  0.00      LIG  
ATOM   7163 H14  LIG     1      20.713  -5.396  19.607  1.00  0.00      LIG  
TER
REMARK  Energy: 12.8523
REMARK  SimpleFitness: 12.8523
REMARK  FullFitness: -2502.1934
REMARK  InterFull: -18.1141
REMARK  IntraFull: 69.4527
REMARK  solvFull: -2909.55
REMARK  surfFull: 356.018
REMARK  extraFull: 0.0
REMARK  deltaGcompsolvpol: -2909.55
REMARK  deltaGcompsolvnonpol: 356.018
REMARK  deltaGprotsolvpol: -2902.69
REMARK  deltaGprotsolvnonpol: 355.646
REMARK  deltaGligsolvpol: -18.057
REMARK  deltaGligsolvnonpol: 6.46324
REMARK  deltaGvdw: -18.1141
REMARK  deltaGelec: 0.0
REMARK  deltaG: -5.5945745
REMARK  Cluster: 10
REMARK  ClusterRank: 6
ATOM   7134 C    LIG     1      24.747  -1.761  14.962  1.00  0.00      LIG  
ATOM   7135 C1   LIG     1      24.568  -2.705  16.111  1.00  0.00      LIG  
ATOM   7136 O    LIG     1      24.869  -3.886  16.045  1.00  0.00      LIG  
ATOM   7137 N    LIG     1      23.930  -2.112  17.178  1.00  0.00      LIG  
ATOM   7138 C2   LIG     1      23.646  -2.821  18.422  1.00  0.00      LIG  
ATOM   7139 C3   LIG     1      24.650  -2.170  19.360  1.00  0.00      LIG  
ATOM   7140 O1   LIG     1      24.547  -2.176  20.578  1.00  0.00      LIG  
ATOM   7141 C4   LIG     1      22.186  -2.680  18.922  1.00  0.00      LIG  
ATOM   7142 C5   LIG     1      21.092  -3.230  17.975  1.00  0.00      LIG  
ATOM   7143 C6   LIG     1      19.665  -2.771  18.342  1.00  0.00      LIG  
ATOM   7144 C7   LIG     1      18.617  -3.731  17.793  1.00  0.00      LIG  
ATOM   7145 O2   LIG     1      18.664  -3.817  16.377  1.00  0.00      LIG  
ATOM   7146 O3   LIG     1      19.457  -2.681  19.749  1.00  0.00      LIG  
ATOM   7147 O4   LIG     1      21.312  -2.853  16.619  1.00  0.00      LIG  
ATOM   7148 O5   LIG     1      22.061  -3.419  20.140  1.00  0.00      LIG  
ATOM   7149 H    LIG     1      25.596  -2.094  14.361  1.00  0.00      LIG  
ATOM   7150 H1   LIG     1      24.947  -0.746  15.320  1.00  0.00      LIG  
ATOM   7151 H2   LIG     1      23.839  -1.761  14.353  1.00  0.00      LIG  
ATOM   7152 H3   LIG     1      23.742  -1.116  17.131  1.00  0.00      LIG  
ATOM   7153 H4   LIG     1      23.928  -3.874  18.327  1.00  0.00      LIG  
ATOM   7154 H5   LIG     1      25.654  -2.006  18.934  1.00  0.00      LIG  
ATOM   7155 H6   LIG     1      21.981  -1.629  19.142  1.00  0.00      LIG  
ATOM   7156 H7   LIG     1      21.116  -4.323  18.014  1.00  0.00      LIG  
ATOM   7157 H8   LIG     1      19.487  -1.778  17.916  1.00  0.00      LIG  
ATOM   7158 H9   LIG     1      17.613  -3.411  18.086  1.00  0.00      LIG  
ATOM   7159 H10  LIG     1      18.763  -4.734  18.205  1.00  0.00      LIG  
ATOM   7160 H11  LIG     1      18.676  -2.904  16.040  1.00  0.00      LIG  
ATOM   7161 H12  LIG     1      18.513  -2.489  19.882  1.00  0.00      LIG  
ATOM   7162 H13  LIG     1      22.249  -3.034  16.427  1.00  0.00      LIG  
ATOM   7163 H14  LIG     1      21.127  -3.336  20.407  1.00  0.00      LIG  
TER
REMARK  Energy: 12.8521
REMARK  SimpleFitness: 12.8521
REMARK  FullFitness: -2502.1418
REMARK  InterFull: -18.0875
REMARK  IntraFull: 69.4756
REMARK  solvFull: -2909.55
REMARK  surfFull: 356.02
REMARK  extraFull: 0.0
REMARK  deltaGcompsolvpol: -2909.55
REMARK  deltaGcompsolvnonpol: 356.02
REMARK  deltaGprotsolvpol: -2902.69
REMARK  deltaGprotsolvnonpol: 355.646
REMARK  deltaGligsolvpol: -18.073
REMARK  deltaGligsolvnonpol: 6.46292
REMARK  deltaGvdw: -18.0875
REMARK  deltaGelec: 0.0
REMARK  deltaG: -5.590861
REMARK  Cluster: 10
REMARK  ClusterRank: 7
ATOM   7134 C    LIG     1      24.737  -1.751  14.961  1.00  0.00      LIG  
ATOM   7135 C1   LIG     1      24.562  -2.701  16.105  1.00  0.00      LIG  
ATOM   7136 O    LIG     1      24.865  -3.881  16.032  1.00  0.00      LIG  
ATOM   7137 N    LIG     1      23.925  -2.115  17.177  1.00  0.00      LIG  
ATOM   7138 C2   LIG     1      23.643  -2.831  18.416  1.00  0.00      LIG  
ATOM   7139 C3   LIG     1      24.653  -2.190  19.356  1.00  0.00      LIG  
ATOM   7140 O1   LIG     1      24.554  -2.205  20.574  1.00  0.00      LIG  
ATOM   7141 C4   LIG     1      22.185  -2.689  18.921  1.00  0.00      LIG  
ATOM   7142 C5   LIG     1      21.087  -3.232  17.975  1.00  0.00      LIG  
ATOM   7143 C6   LIG     1      19.664  -2.767  18.346  1.00  0.00      LIG  
ATOM   7144 C7   LIG     1      18.609  -3.718  17.795  1.00  0.00      LIG  
ATOM   7145 O2   LIG     1      18.649  -3.792  16.378  1.00  0.00      LIG  
ATOM   7146 O3   LIG     1      19.459  -2.683  19.755  1.00  0.00      LIG  
ATOM   7147 O4   LIG     1      21.306  -2.854  16.619  1.00  0.00      LIG  
ATOM   7148 O5   LIG     1      22.062  -3.431  20.137  1.00  0.00      LIG  
ATOM   7149 H    LIG     1      25.593  -2.073  14.362  1.00  0.00      LIG  
ATOM   7150 H1   LIG     1      24.926  -0.735  15.324  1.00  0.00      LIG  
ATOM   7151 H2   LIG     1      23.833  -1.757  14.347  1.00  0.00      LIG  
ATOM   7152 H3   LIG     1      23.736  -1.119  17.136  1.00  0.00      LIG  
ATOM   7153 H4   LIG     1      23.921  -3.885  18.314  1.00  0.00      LIG  
ATOM   7154 H5   LIG     1      25.656  -2.026  18.926  1.00  0.00      LIG  
ATOM   7155 H6   LIG     1      21.984  -1.638  19.146  1.00  0.00      LIG  
ATOM   7156 H7   LIG     1      21.106  -4.326  18.013  1.00  0.00      LIG  
ATOM   7157 H8   LIG     1      19.491  -1.771  17.926  1.00  0.00      LIG  
ATOM   7158 H9   LIG     1      17.607  -3.395  18.094  1.00  0.00      LIG  
ATOM   7159 H10  LIG     1      18.752  -4.724  18.198  1.00  0.00      LIG  
ATOM   7160 H11  LIG     1      18.654  -2.877  16.048  1.00  0.00      LIG  
ATOM   7161 H12  LIG     1      18.516  -2.487  19.890  1.00  0.00      LIG  
ATOM   7162 H13  LIG     1      22.242  -3.040  16.425  1.00  0.00      LIG  
ATOM   7163 H14  LIG     1      21.128  -3.347  20.407  1.00  0.00      LIG  
TER
REMARK  Energy: 4.57486
REMARK  SimpleFitness: 4.57486
REMARK  FullFitness: -2514.0364
REMARK  InterFull: -20.2148
REMARK  IntraFull: 58.2295
REMARK  solvFull: -2907.02
REMARK  surfFull: 354.969
REMARK  extraFull: 0.0
REMARK  deltaGcompsolvpol: -2907.02
REMARK  deltaGcompsolvnonpol: 354.969
REMARK  deltaGprotsolvpol: -2902.69
REMARK  deltaGprotsolvnonpol: 355.646
REMARK  deltaGligsolvpol: -15.0596
REMARK  deltaGligsolvnonpol: 6.67799
REMARK  deltaGvdw: -20.2148
REMARK  deltaGelec: 0.0
REMARK  deltaG: -5.9414554
REMARK  Cluster: 11
REMARK  ClusterRank: 0
ATOM   7134 C    LIG     1       3.547   4.091  33.483  1.00  0.00      LIG  
ATOM   7135 C1   LIG     1       3.528   5.567  33.735  1.00  0.00      LIG  
ATOM   7136 O    LIG     1       2.808   6.070  34.584  1.00  0.00      LIG  
ATOM   7137 N    LIG     1       4.523   6.231  33.056  1.00  0.00      LIG  
ATOM   7138 C2   LIG     1       4.869   7.610  33.368  1.00  0.00      LIG  
ATOM   7139 C3   LIG     1       6.322   7.794  33.016  1.00  0.00      LIG  
ATOM   7140 O1   LIG     1       6.822   8.902  32.885  1.00  0.00      LIG  
ATOM   7141 C4   LIG     1       3.951   8.680  32.748  1.00  0.00      LIG  
ATOM   7142 C5   LIG     1       3.560   8.420  31.285  1.00  0.00      LIG  
ATOM   7143 C6   LIG     1       2.794   9.595  30.666  1.00  0.00      LIG  
ATOM   7144 C7   LIG     1       2.548   9.371  29.175  1.00  0.00      LIG  
ATOM   7145 O2   LIG     1       2.053  10.566  28.581  1.00  0.00      LIG  
ATOM   7146 O3   LIG     1       1.529   9.761  31.307  1.00  0.00      LIG  
ATOM   7147 O4   LIG     1       4.734   8.189  30.512  1.00  0.00      LIG  
ATOM   7148 O5   LIG     1       2.784   8.785  33.564  1.00  0.00      LIG  
ATOM   7149 H    LIG     1       2.547   3.693  33.665  1.00  0.00      LIG  
ATOM   7150 H1   LIG     1       4.260   3.617  34.160  1.00  0.00      LIG  
ATOM   7151 H2   LIG     1       3.836   3.871  32.454  1.00  0.00      LIG  
ATOM   7152 H3   LIG     1       5.062   5.727  32.360  1.00  0.00      LIG  
ATOM   7153 H4   LIG     1       4.823   7.687  34.454  1.00  0.00      LIG  
ATOM   7154 H5   LIG     1       6.973   6.934  33.241  1.00  0.00      LIG  
ATOM   7155 H6   LIG     1       4.447   9.654  32.800  1.00  0.00      LIG  
ATOM   7156 H7   LIG     1       2.931   7.529  31.240  1.00  0.00      LIG  
ATOM   7157 H8   LIG     1       3.356  10.523  30.804  1.00  0.00      LIG  
ATOM   7158 H9   LIG     1       1.802   8.587  29.018  1.00  0.00      LIG  
ATOM   7159 H10  LIG     1       3.462   9.097  28.642  1.00  0.00      LIG  
ATOM   7160 H11  LIG     1       1.387  10.917  29.197  1.00  0.00      LIG  
ATOM   7161 H12  LIG     1       1.692   9.659  32.263  1.00  0.00      LIG  
ATOM   7162 H13  LIG     1       5.276   8.995  30.568  1.00  0.00      LIG  
ATOM   7163 H14  LIG     1       2.563   7.878  33.850  1.00  0.00      LIG  
TER
REMARK  Energy: 6.31348
REMARK  SimpleFitness: 6.31348
REMARK  FullFitness: -2511.342
REMARK  InterFull: -21.7493
REMARK  IntraFull: 60.968
REMARK  solvFull: -2905.38
REMARK  surfFull: 354.819
REMARK  extraFull: 0.0
REMARK  deltaGcompsolvpol: -2905.38
REMARK  deltaGcompsolvnonpol: 354.819
REMARK  deltaGprotsolvpol: -2902.69
REMARK  deltaGprotsolvnonpol: 355.646
REMARK  deltaGligsolvpol: -14.9452
REMARK  deltaGligsolvnonpol: 6.82067
REMARK  deltaGvdw: -21.7493
REMARK  deltaGelec: 0.0
REMARK  deltaG: -6.0209312
REMARK  Cluster: 11
REMARK  ClusterRank: 1
ATOM   7134 C    LIG     1       3.544   4.116  33.498  1.00  0.00      LIG  
ATOM   7135 C1   LIG     1       3.565   5.596  33.725  1.00  0.00      LIG  
ATOM   7136 O    LIG     1       2.845   6.138  34.549  1.00  0.00      LIG  
ATOM   7137 N    LIG     1       4.587   6.216  33.044  1.00  0.00      LIG  
ATOM   7138 C2   LIG     1       4.985   7.586  33.328  1.00  0.00      LIG  
ATOM   7139 C3   LIG     1       6.408   7.736  32.862  1.00  0.00      LIG  
ATOM   7140 O1   LIG     1       6.913   7.047  31.986  1.00  0.00      LIG  
ATOM   7141 C4   LIG     1       4.072   8.679  32.743  1.00  0.00      LIG  
ATOM   7142 C5   LIG     1       3.567   8.401  31.323  1.00  0.00      LIG  
ATOM   7143 C6   LIG     1       2.539   9.448  30.857  1.00  0.00      LIG  
ATOM   7144 C7   LIG     1       3.062  10.884  30.756  1.00  0.00      LIG  
ATOM   7145 O2   LIG     1       4.170  11.001  29.870  1.00  0.00      LIG  
ATOM   7146 O3   LIG     1       1.996   9.052  29.596  1.00  0.00      LIG  
ATOM   7147 O4   LIG     1       4.669   8.319  30.417  1.00  0.00      LIG  
ATOM   7148 O5   LIG     1       2.954   8.850  33.611  1.00  0.00      LIG  
ATOM   7149 H    LIG     1       2.533   3.748  33.689  1.00  0.00      LIG  
ATOM   7150 H1   LIG     1       4.245   3.634  34.182  1.00  0.00      LIG  
ATOM   7151 H2   LIG     1       3.824   3.872  32.471  1.00  0.00      LIG  
ATOM   7152 H3   LIG     1       5.180   5.657  32.438  1.00  0.00      LIG  
ATOM   7153 H4   LIG     1       5.009   7.678  34.414  1.00  0.00      LIG  
ATOM   7154 H5   LIG     1       6.941   8.611  33.264  1.00  0.00      LIG  
ATOM   7155 H6   LIG     1       4.621   9.626  32.747  1.00  0.00      LIG  
ATOM   7156 H7   LIG     1       3.066   7.432  31.302  1.00  0.00      LIG  
ATOM   7157 H8   LIG     1       1.697   9.450  31.553  1.00  0.00      LIG  
ATOM   7158 H9   LIG     1       3.374  11.251  31.737  1.00  0.00      LIG  
ATOM   7159 H10  LIG     1       2.278  11.545  30.378  1.00  0.00      LIG  
ATOM   7160 H11  LIG     1       4.689  10.182  29.971  1.00  0.00      LIG  
ATOM   7161 H12  LIG     1       2.719   9.145  28.951  1.00  0.00      LIG  
ATOM   7162 H13  LIG     1       5.285   7.650  30.769  1.00  0.00      LIG  
ATOM   7163 H14  LIG     1       2.649   7.954  33.851  1.00  0.00      LIG  
TER
REMARK  Energy: 6.31042
REMARK  SimpleFitness: 6.31042
REMARK  FullFitness: -2511.334
REMARK  InterFull: -21.654
REMARK  IntraFull: 60.9469
REMARK  solvFull: -2905.45
REMARK  surfFull: 354.823
REMARK  extraFull: 0.0
REMARK  deltaGcompsolvpol: -2905.45
REMARK  deltaGcompsolvnonpol: 354.823
REMARK  deltaGprotsolvpol: -2902.69
REMARK  deltaGprotsolvnonpol: 355.646
REMARK  deltaGligsolvpol: -14.9766
REMARK  deltaGligsolvnonpol: 6.82298
REMARK  deltaGvdw: -21.654
REMARK  deltaGelec: 0.0
REMARK  deltaG: -6.0141225
REMARK  Cluster: 11
REMARK  ClusterRank: 2
ATOM   7134 C    LIG     1       3.552   4.125  33.492  1.00  0.00      LIG  
ATOM   7135 C1   LIG     1       3.574   5.605  33.721  1.00  0.00      LIG  
ATOM   7136 O    LIG     1       2.850   6.146  34.543  1.00  0.00      LIG  
ATOM   7137 N    LIG     1       4.597   6.225  33.043  1.00  0.00      LIG  
ATOM   7138 C2   LIG     1       4.991   7.597  33.324  1.00  0.00      LIG  
ATOM   7139 C3   LIG     1       6.414   7.751  32.857  1.00  0.00      LIG  
ATOM   7140 O1   LIG     1       6.923   7.058  31.987  1.00  0.00      LIG  
ATOM   7141 C4   LIG     1       4.075   8.686  32.736  1.00  0.00      LIG  
ATOM   7142 C5   LIG     1       3.566   8.399  31.320  1.00  0.00      LIG  
ATOM   7143 C6   LIG     1       2.540   9.446  30.848  1.00  0.00      LIG  
ATOM   7144 C7   LIG     1       3.066  10.880  30.739  1.00  0.00      LIG  
ATOM   7145 O2   LIG     1       4.179  10.989  29.858  1.00  0.00      LIG  
ATOM   7146 O3   LIG     1       1.996   9.043  29.590  1.00  0.00      LIG  
ATOM   7147 O4   LIG     1       4.666   8.306  30.411  1.00  0.00      LIG  
ATOM   7148 O5   LIG     1       2.959   8.859  33.607  1.00  0.00      LIG  
ATOM   7149 H    LIG     1       2.539   3.758  33.670  1.00  0.00      LIG  
ATOM   7150 H1   LIG     1       4.244   3.641  34.184  1.00  0.00      LIG  
ATOM   7151 H2   LIG     1       3.845   3.880  32.469  1.00  0.00      LIG  
ATOM   7152 H3   LIG     1       5.193   5.666  32.441  1.00  0.00      LIG  
ATOM   7153 H4   LIG     1       5.015   7.692  34.410  1.00  0.00      LIG  
ATOM   7154 H5   LIG     1       6.942   8.632  33.254  1.00  0.00      LIG  
ATOM   7155 H6   LIG     1       4.622   9.634  32.734  1.00  0.00      LIG  
ATOM   7156 H7   LIG     1       3.061   7.432  31.307  1.00  0.00      LIG  
ATOM   7157 H8   LIG     1       1.698   9.454  31.545  1.00  0.00      LIG  
ATOM   7158 H9   LIG     1       3.375  11.254  31.718  1.00  0.00      LIG  
ATOM   7159 H10  LIG     1       2.285  11.540  30.352  1.00  0.00      LIG  
ATOM   7160 H11  LIG     1       4.695  10.168  29.967  1.00  0.00      LIG  
ATOM   7161 H12  LIG     1       2.725   9.106  28.949  1.00  0.00      LIG  
ATOM   7162 H13  LIG     1       5.280   7.639  30.768  1.00  0.00      LIG  
ATOM   7163 H14  LIG     1       2.655   7.964  33.850  1.00  0.00      LIG  
TER
REMARK  Energy: 9.21488
REMARK  SimpleFitness: 9.21488
REMARK  FullFitness: -2507.2556
REMARK  InterFull: -19.3182
REMARK  IntraFull: 66.1616
REMARK  solvFull: -2908.81
REMARK  surfFull: 354.711
REMARK  extraFull: 0.0
REMARK  deltaGcompsolvpol: -2908.81
REMARK  deltaGcompsolvnonpol: 354.711
REMARK  deltaGprotsolvpol: -2902.69
REMARK  deltaGprotsolvnonpol: 355.646
REMARK  deltaGligsolvpol: -18.7631
REMARK  deltaGligsolvnonpol: 6.69622
REMARK  deltaGvdw: -19.3182
REMARK  deltaGelec: 0.0
REMARK  deltaG: -5.765664
REMARK  Cluster: 11
REMARK  ClusterRank: 3
ATOM   7134 C    LIG     1       3.600   4.196  33.491  1.00  0.00      LIG  
ATOM   7135 C1   LIG     1       3.575   5.675  33.717  1.00  0.00      LIG  
ATOM   7136 O    LIG     1       2.803   6.203  34.502  1.00  0.00      LIG  
ATOM   7137 N    LIG     1       4.572   6.328  33.027  1.00  0.00      LIG  
ATOM   7138 C2   LIG     1       4.939   7.702  33.345  1.00  0.00      LIG  
ATOM   7139 C3   LIG     1       6.396   7.874  33.005  1.00  0.00      LIG  
ATOM   7140 O1   LIG     1       6.918   8.976  32.926  1.00  0.00      LIG  
ATOM   7141 C4   LIG     1       4.046   8.808  32.748  1.00  0.00      LIG  
ATOM   7142 C5   LIG     1       3.644   8.646  31.270  1.00  0.00      LIG  
ATOM   7143 C6   LIG     1       3.248   9.975  30.598  1.00  0.00      LIG  
ATOM   7144 C7   LIG     1       1.985  10.627  31.146  1.00  0.00      LIG  
ATOM   7145 O2   LIG     1       0.900   9.710  31.146  1.00  0.00      LIG  
ATOM   7146 O3   LIG     1       4.307  10.927  30.702  1.00  0.00      LIG  
ATOM   7147 O4   LIG     1       4.715   8.093  30.505  1.00  0.00      LIG  
ATOM   7148 O5   LIG     1       2.863   8.894  33.542  1.00  0.00      LIG  
ATOM   7149 H    LIG     1       3.195   3.967  32.507  1.00  0.00      LIG  
ATOM   7150 H1   LIG     1       2.983   3.713  34.254  1.00  0.00      LIG  
ATOM   7151 H2   LIG     1       4.623   3.817  33.570  1.00  0.00      LIG  
ATOM   7152 H3   LIG     1       5.194   5.769  32.453  1.00  0.00      LIG  
ATOM   7153 H4   LIG     1       4.892   7.767  34.432  1.00  0.00      LIG  
ATOM   7154 H5   LIG     1       7.032   6.994  33.195  1.00  0.00      LIG  
ATOM   7155 H6   LIG     1       4.557   9.766  32.873  1.00  0.00      LIG  
ATOM   7156 H7   LIG     1       2.807   7.949  31.188  1.00  0.00      LIG  
ATOM   7157 H8   LIG     1       3.101   9.783  29.531  1.00  0.00      LIG  
ATOM   7158 H9   LIG     1       1.713  11.489  30.531  1.00  0.00      LIG  
ATOM   7159 H10  LIG     1       2.133  11.004  32.162  1.00  0.00      LIG  
ATOM   7160 H11  LIG     1       1.084   9.074  31.858  1.00  0.00      LIG  
ATOM   7161 H12  LIG     1       5.121  10.453  30.457  1.00  0.00      LIG  
ATOM   7162 H13  LIG     1       4.873   7.199  30.852  1.00  0.00      LIG  
ATOM   7163 H14  LIG     1       2.647   7.983  33.820  1.00  0.00      LIG  
TER
REMARK  Energy: 2.48356
REMARK  SimpleFitness: 2.48356
REMARK  FullFitness: -2513.8801
REMARK  InterFull: -28.3899
REMARK  IntraFull: 63.995
REMARK  solvFull: -2905.11
REMARK  surfFull: 355.625
REMARK  extraFull: 0.0
REMARK  deltaGcompsolvpol: -2905.11
REMARK  deltaGcompsolvnonpol: 355.625
REMARK  deltaGprotsolvpol: -2902.69
REMARK  deltaGprotsolvnonpol: 355.646
REMARK  deltaGligsolvpol: -18.8939
REMARK  deltaGligsolvnonpol: 6.79083
REMARK  deltaGvdw: -28.3899
REMARK  deltaGelec: 0.0
REMARK  deltaG: -6.3118906
REMARK  Cluster: 12
REMARK  ClusterRank: 0
ATOM   7134 C    LIG     1      11.291  30.784  40.699  1.00  0.00      LIG  
ATOM   7135 C1   LIG     1      11.039  29.311  40.821  1.00  0.00      LIG  
ATOM   7136 O    LIG     1      11.923  28.519  41.104  1.00  0.00      LIG  
ATOM   7137 N    LIG     1       9.710  28.984  40.662  1.00  0.00      LIG  
ATOM   7138 C2   LIG     1       9.217  27.623  40.807  1.00  0.00      LIG  
ATOM   7139 C3   LIG     1       8.760  27.492  42.244  1.00  0.00      LIG  
ATOM   7140 O1   LIG     1       7.974  26.631  42.612  1.00  0.00      LIG  
ATOM   7141 C4   LIG     1       8.074  27.309  39.833  1.00  0.00      LIG  
ATOM   7142 C5   LIG     1       8.331  27.790  38.388  1.00  0.00      LIG  
ATOM   7143 C6   LIG     1       9.414  27.021  37.619  1.00  0.00      LIG  
ATOM   7144 C7   LIG     1       9.474  27.438  36.154  1.00  0.00      LIG  
ATOM   7145 O2   LIG     1       9.494  28.855  36.018  1.00  0.00      LIG  
ATOM   7146 O3   LIG     1      10.707  27.221  38.184  1.00  0.00      LIG  
ATOM   7147 O4   LIG     1       7.120  27.671  37.640  1.00  0.00      LIG  
ATOM   7148 O5   LIG     1       7.861  25.898  39.835  1.00  0.00      LIG  
ATOM   7149 H    LIG     1      12.250  30.936  40.197  1.00  0.00      LIG  
ATOM   7150 H1   LIG     1      11.320  31.225  41.699  1.00  0.00      LIG  
ATOM   7151 H2   LIG     1      10.507  31.273  40.110  1.00  0.00      LIG  
ATOM   7152 H3   LIG     1       9.041  29.738  40.545  1.00  0.00      LIG  
ATOM   7153 H4   LIG     1      10.049  26.926  40.683  1.00  0.00      LIG  
ATOM   7154 H5   LIG     1       9.437  27.939  42.989  1.00  0.00      LIG  
ATOM   7155 H6   LIG     1       7.142  27.762  40.186  1.00  0.00      LIG  
ATOM   7156 H7   LIG     1       8.579  28.853  38.410  1.00  0.00      LIG  
ATOM   7157 H8   LIG     1       9.210  25.951  37.650  1.00  0.00      LIG  
ATOM   7158 H9   LIG     1       8.606  27.062  35.605  1.00  0.00      LIG  
ATOM   7159 H10  LIG     1      10.379  27.048  35.680  1.00  0.00      LIG  
ATOM   7160 H11  LIG     1       8.636  29.174  36.348  1.00  0.00      LIG  
ATOM   7161 H12  LIG     1      10.972  28.128  37.952  1.00  0.00      LIG  
ATOM   7162 H13  LIG     1       6.409  28.050  38.191  1.00  0.00      LIG  
ATOM   7163 H14  LIG     1       7.567  25.665  40.735  1.00  0.00      LIG  
TER
REMARK  Energy: 2.48395
REMARK  SimpleFitness: 2.48395
REMARK  FullFitness: -2513.8772
REMARK  InterFull: -28.3737
REMARK  IntraFull: 63.9952
REMARK  solvFull: -2905.13
REMARK  surfFull: 355.631
REMARK  extraFull: 0.0
REMARK  deltaGcompsolvpol: -2905.13
REMARK  deltaGcompsolvnonpol: 355.631
REMARK  deltaGprotsolvpol: -2902.69
REMARK  deltaGprotsolvnonpol: 355.646
REMARK  deltaGligsolvpol: -18.8952
REMARK  deltaGligsolvnonpol: 6.79055
REMARK  deltaGvdw: -28.3737
REMARK  deltaGelec: 0.0
REMARK  deltaG: -6.3108935
REMARK  Cluster: 12
REMARK  ClusterRank: 1
ATOM   7134 C    LIG     1      11.312  30.769  40.698  1.00  0.00      LIG  
ATOM   7135 C1   LIG     1      11.049  29.298  40.825  1.00  0.00      LIG  
ATOM   7136 O    LIG     1      11.929  28.500  41.107  1.00  0.00      LIG  
ATOM   7137 N    LIG     1       9.719  28.979  40.665  1.00  0.00      LIG  
ATOM   7138 C2   LIG     1       9.218  27.620  40.809  1.00  0.00      LIG  
ATOM   7139 C3   LIG     1       8.760  27.491  42.246  1.00  0.00      LIG  
ATOM   7140 O1   LIG     1       7.970  26.633  42.614  1.00  0.00      LIG  
ATOM   7141 C4   LIG     1       8.076  27.310  39.834  1.00  0.00      LIG  
ATOM   7142 C5   LIG     1       8.335  27.791  38.390  1.00  0.00      LIG  
ATOM   7143 C6   LIG     1       9.416  27.020  37.621  1.00  0.00      LIG  
ATOM   7144 C7   LIG     1       9.478  27.438  36.156  1.00  0.00      LIG  
ATOM   7145 O2   LIG     1       9.505  28.855  36.022  1.00  0.00      LIG  
ATOM   7146 O3   LIG     1      10.709  27.215  38.187  1.00  0.00      LIG  
ATOM   7147 O4   LIG     1       7.125  27.676  37.641  1.00  0.00      LIG  
ATOM   7148 O5   LIG     1       7.859  25.900  39.835  1.00  0.00      LIG  
ATOM   7149 H    LIG     1      12.253  30.912  40.161  1.00  0.00      LIG  
ATOM   7150 H1   LIG     1      11.384  31.205  41.698  1.00  0.00      LIG  
ATOM   7151 H2   LIG     1      10.513  31.269  40.141  1.00  0.00      LIG  
ATOM   7152 H3   LIG     1       9.054  29.736  40.547  1.00  0.00      LIG  
ATOM   7153 H4   LIG     1      10.048  26.919  40.687  1.00  0.00      LIG  
ATOM   7154 H5   LIG     1       9.437  27.936  42.992  1.00  0.00      LIG  
ATOM   7155 H6   LIG     1       7.144  27.765  40.187  1.00  0.00      LIG  
ATOM   7156 H7   LIG     1       8.586  28.854  38.412  1.00  0.00      LIG  
ATOM   7157 H8   LIG     1       9.209  25.950  37.650  1.00  0.00      LIG  
ATOM   7158 H9   LIG     1       8.610  27.066  35.607  1.00  0.00      LIG  
ATOM   7159 H10  LIG     1      10.382  27.045  35.682  1.00  0.00      LIG  
ATOM   7160 H11  LIG     1       8.648  29.178  36.351  1.00  0.00      LIG  
ATOM   7161 H12  LIG     1      10.977  28.122  37.956  1.00  0.00      LIG  
ATOM   7162 H13  LIG     1       6.413  28.055  38.191  1.00  0.00      LIG  
ATOM   7163 H14  LIG     1       7.566  25.666  40.736  1.00  0.00      LIG  
TER
REMARK  Energy: 2.94213
REMARK  SimpleFitness: 2.94213
REMARK  FullFitness: -2509.9797
REMARK  InterFull: -22.8372
REMARK  IntraFull: 61.4682
REMARK  solvFull: -2903.9
REMARK  surfFull: 355.289
REMARK  extraFull: 0.0
REMARK  deltaGcompsolvpol: -2903.9
REMARK  deltaGcompsolvnonpol: 355.289
REMARK  deltaGprotsolvpol: -2902.69
REMARK  deltaGprotsolvnonpol: 355.646
REMARK  deltaGligsolvpol: -15.7654
REMARK  deltaGligsolvnonpol: 6.54691
REMARK  deltaGvdw: -22.8372
REMARK  deltaGelec: 0.0
REMARK  deltaG: -5.9127154
REMARK  Cluster: 12
REMARK  ClusterRank: 2
ATOM   7134 C    LIG     1      11.440  28.236  42.612  1.00  0.00      LIG  
ATOM   7135 C1   LIG     1      11.015  27.821  41.236  1.00  0.00      LIG  
ATOM   7136 O    LIG     1      11.818  27.504  40.371  1.00  0.00      LIG  
ATOM   7137 N    LIG     1       9.655  27.894  41.058  1.00  0.00      LIG  
ATOM   7138 C2   LIG     1       9.019  27.545  39.796  1.00  0.00      LIG  
ATOM   7139 C3   LIG     1       7.559  27.328  40.113  1.00  0.00      LIG  
ATOM   7140 O1   LIG     1       7.130  27.223  41.253  1.00  0.00      LIG  
ATOM   7141 C4   LIG     1       9.242  28.611  38.705  1.00  0.00      LIG  
ATOM   7142 C5   LIG     1       8.643  28.205  37.350  1.00  0.00      LIG  
ATOM   7143 C6   LIG     1       9.070  29.093  36.174  1.00  0.00      LIG  
ATOM   7144 C7   LIG     1       8.228  30.358  36.057  1.00  0.00      LIG  
ATOM   7145 O2   LIG     1       8.454  30.962  34.789  1.00  0.00      LIG  
ATOM   7146 O3   LIG     1      10.448  29.452  36.290  1.00  0.00      LIG  
ATOM   7147 O4   LIG     1       9.058  26.874  37.056  1.00  0.00      LIG  
ATOM   7148 O5   LIG     1       8.727  29.883  39.101  1.00  0.00      LIG  
ATOM   7149 H    LIG     1      10.646  28.048  43.343  1.00  0.00      LIG  
ATOM   7150 H1   LIG     1      11.683  29.302  42.604  1.00  0.00      LIG  
ATOM   7151 H2   LIG     1      12.321  27.655  42.897  1.00  0.00      LIG  
ATOM   7152 H3   LIG     1       9.061  28.123  41.849  1.00  0.00      LIG  
ATOM   7153 H4   LIG     1       9.435  26.585  39.476  1.00  0.00      LIG  
ATOM   7154 H5   LIG     1       6.920  27.065  39.257  1.00  0.00      LIG  
ATOM   7155 H6   LIG     1      10.323  28.730  38.599  1.00  0.00      LIG  
ATOM   7156 H7   LIG     1       7.551  28.200  37.402  1.00  0.00      LIG  
ATOM   7157 H8   LIG     1       8.991  28.526  35.244  1.00  0.00      LIG  
ATOM   7158 H9   LIG     1       8.495  31.092  36.822  1.00  0.00      LIG  
ATOM   7159 H10  LIG     1       7.163  30.125  36.136  1.00  0.00      LIG  
ATOM   7160 H11  LIG     1       9.412  30.914  34.627  1.00  0.00      LIG  
ATOM   7161 H12  LIG     1      10.520  30.044  37.059  1.00  0.00      LIG  
ATOM   7162 H13  LIG     1      10.002  26.924  36.824  1.00  0.00      LIG  
ATOM   7163 H14  LIG     1       9.048  30.041  40.006  1.00  0.00      LIG  
TER
REMARK  Energy: 8.48353
REMARK  SimpleFitness: 8.48353
REMARK  FullFitness: -2505.9219
REMARK  InterFull: -24.0772
REMARK  IntraFull: 67.1392
REMARK  solvFull: -2904.38
REMARK  surfFull: 355.396
REMARK  extraFull: 0.0
REMARK  deltaGcompsolvpol: -2904.38
REMARK  deltaGcompsolvnonpol: 355.396
REMARK  deltaGprotsolvpol: -2902.69
REMARK  deltaGprotsolvnonpol: 355.646
REMARK  deltaGligsolvpol: -16.0285
REMARK  deltaGligsolvnonpol: 6.58521
REMARK  deltaGvdw: -24.0772
REMARK  deltaGelec: 0.0
REMARK  deltaG: -6.036794
REMARK  Cluster: 12
REMARK  ClusterRank: 3
ATOM   7134 C    LIG     1      11.700  28.065  43.310  1.00  0.00      LIG  
ATOM   7135 C1   LIG     1      11.382  27.855  41.859  1.00  0.00      LIG  
ATOM   7136 O    LIG     1      12.245  27.591  41.035  1.00  0.00      LIG  
ATOM   7137 N    LIG     1      10.039  27.943  41.581  1.00  0.00      LIG  
ATOM   7138 C2   LIG     1       9.518  27.749  40.238  1.00  0.00      LIG  
ATOM   7139 C3   LIG     1       8.066  27.350  40.414  1.00  0.00      LIG  
ATOM   7140 O1   LIG     1       7.564  27.061  41.492  1.00  0.00      LIG  
ATOM   7141 C4   LIG     1       9.754  28.988  39.348  1.00  0.00      LIG  
ATOM   7142 C5   LIG     1       9.684  28.636  37.853  1.00  0.00      LIG  
ATOM   7143 C6   LIG     1       8.278  28.731  37.230  1.00  0.00      LIG  
ATOM   7144 C7   LIG     1       8.019  29.959  36.352  1.00  0.00      LIG  
ATOM   7145 O2   LIG     1       8.218  31.175  37.063  1.00  0.00      LIG  
ATOM   7146 O3   LIG     1       8.087  27.583  36.410  1.00  0.00      LIG  
ATOM   7147 O4   LIG     1      10.586  29.477  37.133  1.00  0.00      LIG  
ATOM   7148 O5   LIG     1       8.871  30.061  39.686  1.00  0.00      LIG  
ATOM   7149 H    LIG     1      12.448  28.856  43.395  1.00  0.00      LIG  
ATOM   7150 H1   LIG     1      12.095  27.133  43.722  1.00  0.00      LIG  
ATOM   7151 H2   LIG     1      10.812  28.357  43.881  1.00  0.00      LIG  
ATOM   7152 H3   LIG     1       9.387  28.159  42.329  1.00  0.00      LIG  
ATOM   7153 H4   LIG     1      10.046  26.895  39.802  1.00  0.00      LIG  
ATOM   7154 H5   LIG     1       7.520  27.135  39.484  1.00  0.00      LIG  
ATOM   7155 H6   LIG     1      10.761  29.367  39.554  1.00  0.00      LIG  
ATOM   7156 H7   LIG     1      10.084  27.624  37.737  1.00  0.00      LIG  
ATOM   7157 H8   LIG     1       7.525  28.680  38.016  1.00  0.00      LIG  
ATOM   7158 H9   LIG     1       6.988  29.942  35.988  1.00  0.00      LIG  
ATOM   7159 H10  LIG     1       8.658  29.960  35.464  1.00  0.00      LIG  
ATOM   7160 H11  LIG     1       9.181  31.317  37.076  1.00  0.00      LIG  
ATOM   7161 H12  LIG     1       8.735  27.648  35.687  1.00  0.00      LIG  
ATOM   7162 H13  LIG     1      11.452  29.402  37.568  1.00  0.00      LIG  
ATOM   7163 H14  LIG     1       8.846  30.664  38.921  1.00  0.00      LIG  
TER
REMARK  Energy: 7.60067
REMARK  SimpleFitness: 7.60067
REMARK  FullFitness: -2505.8887
REMARK  InterFull: -22.2259
REMARK  IntraFull: 64.9204
REMARK  solvFull: -2903.87
REMARK  surfFull: 355.287
REMARK  extraFull: 0.0
REMARK  deltaGcompsolvpol: -2903.87
REMARK  deltaGcompsolvnonpol: 355.287
REMARK  deltaGprotsolvpol: -2902.69
REMARK  deltaGprotsolvnonpol: 355.646
REMARK  deltaGligsolvpol: -16.8527
REMARK  deltaGligsolvnonpol: 6.63852
REMARK  deltaGvdw: -22.2259
REMARK  deltaGelec: 0.0
REMARK  deltaG: -5.7953777
REMARK  Cluster: 12
REMARK  ClusterRank: 4
ATOM   7134 C    LIG     1      11.553  27.833  41.878  1.00  0.00      LIG  
ATOM   7135 C1   LIG     1      11.065  29.096  41.236  1.00  0.00      LIG  
ATOM   7136 O    LIG     1      11.461  30.187  41.614  1.00  0.00      LIG  
ATOM   7137 N    LIG     1      10.132  28.960  40.226  1.00  0.00      LIG  
ATOM   7138 C2   LIG     1       9.532  27.731  39.704  1.00  0.00      LIG  
ATOM   7139 C3   LIG     1       8.190  27.573  40.376  1.00  0.00      LIG  
ATOM   7140 O1   LIG     1       7.342  26.802  39.952  1.00  0.00      LIG  
ATOM   7141 C4   LIG     1       9.397  27.739  38.167  1.00  0.00      LIG  
ATOM   7142 C5   LIG     1       9.146  29.131  37.561  1.00  0.00      LIG  
ATOM   7143 C6   LIG     1       8.846  29.067  36.061  1.00  0.00      LIG  
ATOM   7144 C7   LIG     1       8.332  30.396  35.505  1.00  0.00      LIG  
ATOM   7145 O2   LIG     1       9.202  31.469  35.853  1.00  0.00      LIG  
ATOM   7146 O3   LIG     1      10.021  28.688  35.342  1.00  0.00      LIG  
ATOM   7147 O4   LIG     1       8.040  29.740  38.217  1.00  0.00      LIG  
ATOM   7148 O5   LIG     1      10.589  27.177  37.623  1.00  0.00      LIG  
ATOM   7149 H    LIG     1      12.302  28.090  42.631  1.00  0.00      LIG  
ATOM   7150 H1   LIG     1      12.014  27.184  41.128  1.00  0.00      LIG  
ATOM   7151 H2   LIG     1      10.718  27.322  42.365  1.00  0.00      LIG  
ATOM   7152 H3   LIG     1       9.777  29.832  39.842  1.00  0.00      LIG  
ATOM   7153 H4   LIG     1      10.128  26.873  40.020  1.00  0.00      LIG  
ATOM   7154 H5   LIG     1       8.149  27.884  41.433  1.00  0.00      LIG  
ATOM   7155 H6   LIG     1       8.583  27.076  37.859  1.00  0.00      LIG  
ATOM   7156 H7   LIG     1      10.030  29.757  37.716  1.00  0.00      LIG  
ATOM   7157 H8   LIG     1       8.086  28.303  35.872  1.00  0.00      LIG  
ATOM   7158 H9   LIG     1       7.338  30.626  35.897  1.00  0.00      LIG  
ATOM   7159 H10  LIG     1       8.273  30.360  34.414  1.00  0.00      LIG  
ATOM   7160 H11  LIG     1      10.101  31.181  35.618  1.00  0.00      LIG  
ATOM   7161 H12  LIG     1       9.871  28.921  34.410  1.00  0.00      LIG  
ATOM   7162 H13  LIG     1       7.274  29.147  38.112  1.00  0.00      LIG  
ATOM   7163 H14  LIG     1      10.630  27.469  36.693  1.00  0.00      LIG  
TER
REMARK  Energy: 10.0314
REMARK  SimpleFitness: 10.0314
REMARK  FullFitness: -2502.8257
REMARK  InterFull: -21.5631
REMARK  IntraFull: 66.7214
REMARK  solvFull: -2903.46
REMARK  surfFull: 355.476
REMARK  extraFull: 0.0
REMARK  deltaGcompsolvpol: -2903.46
REMARK  deltaGcompsolvnonpol: 355.476
REMARK  deltaGprotsolvpol: -2902.69
REMARK  deltaGprotsolvnonpol: 355.646
REMARK  deltaGligsolvpol: -16.4427
REMARK  deltaGligsolvnonpol: 6.96169
REMARK  deltaGvdw: -21.5631
REMARK  deltaGelec: 0.0
REMARK  deltaG: -5.7453575
REMARK  Cluster: 12
REMARK  ClusterRank: 5
ATOM   7134 C    LIG     1      12.262  27.465  40.767  1.00  0.00      LIG  
ATOM   7135 C1   LIG     1      11.579  28.799  40.773  1.00  0.00      LIG  
ATOM   7136 O    LIG     1      12.218  29.835  40.854  1.00  0.00      LIG  
ATOM   7137 N    LIG     1      10.199  28.788  40.687  1.00  0.00      LIG  
ATOM   7138 C2   LIG     1       9.311  27.629  40.638  1.00  0.00      LIG  
ATOM   7139 C3   LIG     1       8.849  27.497  42.080  1.00  0.00      LIG  
ATOM   7140 O1   LIG     1       7.865  26.852  42.412  1.00  0.00      LIG  
ATOM   7141 C4   LIG     1       8.131  27.823  39.662  1.00  0.00      LIG  
ATOM   7142 C5   LIG     1       8.535  27.962  38.178  1.00  0.00      LIG  
ATOM   7143 C6   LIG     1       9.186  29.292  37.788  1.00  0.00      LIG  
ATOM   7144 C7   LIG     1       9.326  29.436  36.277  1.00  0.00      LIG  
ATOM   7145 O2   LIG     1       8.064  29.330  35.630  1.00  0.00      LIG  
ATOM   7146 O3   LIG     1       8.432  30.384  38.306  1.00  0.00      LIG  
ATOM   7147 O4   LIG     1       9.424  26.906  37.816  1.00  0.00      LIG  
ATOM   7148 O5   LIG     1       7.278  26.674  39.720  1.00  0.00      LIG  
ATOM   7149 H    LIG     1      12.008  26.916  39.855  1.00  0.00      LIG  
ATOM   7150 H1   LIG     1      11.967  26.894  41.651  1.00  0.00      LIG  
ATOM   7151 H2   LIG     1      13.343  27.625  40.792  1.00  0.00      LIG  
ATOM   7152 H3   LIG     1       9.758  29.703  40.712  1.00  0.00      LIG  
ATOM   7153 H4   LIG     1       9.863  26.721  40.396  1.00  0.00      LIG  
ATOM   7154 H5   LIG     1       9.624  27.685  42.842  1.00  0.00      LIG  
ATOM   7155 H6   LIG     1       7.525  28.681  39.967  1.00  0.00      LIG  
ATOM   7156 H7   LIG     1       7.631  27.826  37.577  1.00  0.00      LIG  
ATOM   7157 H8   LIG     1      10.194  29.358  38.203  1.00  0.00      LIG  
ATOM   7158 H9   LIG     1       9.977  28.655  35.875  1.00  0.00      LIG  
ATOM   7159 H10  LIG     1       9.747  30.412  36.017  1.00  0.00      LIG  
ATOM   7160 H11  LIG     1       7.585  30.158  35.808  1.00  0.00      LIG  
ATOM   7161 H12  LIG     1       7.522  30.270  37.980  1.00  0.00      LIG  
ATOM   7162 H13  LIG     1       9.010  26.086  38.138  1.00  0.00      LIG  
ATOM   7163 H14  LIG     1       7.052  26.535  40.659  1.00  0.00      LIG  
TER
REMARK  Energy: 24.2049
REMARK  SimpleFitness: 24.2049
REMARK  FullFitness: -2491.0303
REMARK  InterFull: -19.3637
REMARK  IntraFull: 81.8833
REMARK  solvFull: -2909.44
REMARK  surfFull: 355.89
REMARK  extraFull: 0.0
REMARK  deltaGcompsolvpol: -2909.44
REMARK  deltaGcompsolvnonpol: 355.89
REMARK  deltaGprotsolvpol: -2902.69
REMARK  deltaGprotsolvnonpol: 355.646
REMARK  deltaGligsolvpol: -20.9255
REMARK  deltaGligsolvnonpol: 6.85792
REMARK  deltaGvdw: -19.3637
REMARK  deltaGelec: 0.0
REMARK  deltaG: -5.5799403
REMARK  Cluster: 12
REMARK  ClusterRank: 6
ATOM   7134 C    LIG     1      11.784  29.880  40.741  1.00  0.00      LIG  
ATOM   7135 C1   LIG     1      12.180  28.486  40.338  1.00  0.00      LIG  
ATOM   7136 O    LIG     1      13.322  28.255  39.973  1.00  0.00      LIG  
ATOM   7137 N    LIG     1      11.227  27.480  40.393  1.00  0.00      LIG  
ATOM   7138 C2   LIG     1       9.794  27.543  40.697  1.00  0.00      LIG  
ATOM   7139 C3   LIG     1       9.605  27.727  42.193  1.00  0.00      LIG  
ATOM   7140 O1   LIG     1      10.485  27.546  43.025  1.00  0.00      LIG  
ATOM   7141 C4   LIG     1       8.955  28.449  39.767  1.00  0.00      LIG  
ATOM   7142 C5   LIG     1       8.633  27.752  38.441  1.00  0.00      LIG  
ATOM   7143 C6   LIG     1       8.039  28.761  37.447  1.00  0.00      LIG  
ATOM   7144 C7   LIG     1       8.999  29.247  36.366  1.00  0.00      LIG  
ATOM   7145 O2   LIG     1      10.127  29.893  36.943  1.00  0.00      LIG  
ATOM   7146 O3   LIG     1       6.924  28.160  36.803  1.00  0.00      LIG  
ATOM   7147 O4   LIG     1       9.775  27.113  37.873  1.00  0.00      LIG  
ATOM   7148 O5   LIG     1       7.704  28.790  40.368  1.00  0.00      LIG  
ATOM   7149 H    LIG     1      11.383  30.408  39.872  1.00  0.00      LIG  
ATOM   7150 H1   LIG     1      12.676  30.401  41.099  1.00  0.00      LIG  
ATOM   7151 H2   LIG     1      11.049  29.875  41.548  1.00  0.00      LIG  
ATOM   7152 H3   LIG     1      11.590  26.561  40.164  1.00  0.00      LIG  
ATOM   7153 H4   LIG     1       9.420  26.532  40.523  1.00  0.00      LIG  
ATOM   7154 H5   LIG     1       8.557  27.787  42.524  1.00  0.00      LIG  
ATOM   7155 H6   LIG     1       9.478  29.383  39.562  1.00  0.00      LIG  
ATOM   7156 H7   LIG     1       7.903  26.960  38.642  1.00  0.00      LIG  
ATOM   7157 H8   LIG     1       7.658  29.629  37.990  1.00  0.00      LIG  
ATOM   7158 H9   LIG     1       8.492  29.959  35.709  1.00  0.00      LIG  
ATOM   7159 H10  LIG     1       9.340  28.426  35.728  1.00  0.00      LIG  
ATOM   7160 H11  LIG     1      10.622  29.198  37.412  1.00  0.00      LIG  
ATOM   7161 H12  LIG     1       6.219  28.099  37.473  1.00  0.00      LIG  
ATOM   7162 H13  LIG     1      10.204  26.607  38.584  1.00  0.00      LIG  
ATOM   7163 H14  LIG     1       7.113  29.113  39.665  1.00  0.00      LIG  
TER
REMARK  Energy: 5.31183
REMARK  SimpleFitness: 5.31183
REMARK  FullFitness: -2513.8315
REMARK  InterFull: -25.0352
REMARK  IntraFull: 62.9084
REMARK  solvFull: -2907.38
REMARK  surfFull: 355.675
REMARK  extraFull: 0.0
REMARK  deltaGcompsolvpol: -2907.38
REMARK  deltaGcompsolvnonpol: 355.675
REMARK  deltaGprotsolvpol: -2902.69
REMARK  deltaGprotsolvnonpol: 355.646
REMARK  deltaGligsolvpol: -16.7619
REMARK  deltaGligsolvnonpol: 6.83393
REMARK  deltaGvdw: -25.0352
REMARK  deltaGelec: 0.0
REMARK  deltaG: -6.2632732
REMARK  Cluster: 13
REMARK  ClusterRank: 0
ATOM   7134 C    LIG     1      21.758  -8.287  18.361  1.00  0.00      LIG  
ATOM   7135 C1   LIG     1      20.761  -7.529  19.184  1.00  0.00      LIG  
ATOM   7136 O    LIG     1      19.618  -7.925  19.345  1.00  0.00      LIG  
ATOM   7137 N    LIG     1      21.286  -6.392  19.754  1.00  0.00      LIG  
ATOM   7138 C2   LIG     1      20.530  -5.558  20.678  1.00  0.00      LIG  
ATOM   7139 C3   LIG     1      21.106  -5.855  22.044  1.00  0.00      LIG  
ATOM   7140 O1   LIG     1      22.270  -6.177  22.241  1.00  0.00      LIG  
ATOM   7141 C4   LIG     1      20.672  -4.066  20.345  1.00  0.00      LIG  
ATOM   7142 C5   LIG     1      20.214  -3.733  18.913  1.00  0.00      LIG  
ATOM   7143 C6   LIG     1      18.719  -3.413  18.765  1.00  0.00      LIG  
ATOM   7144 C7   LIG     1      18.361  -3.137  17.308  1.00  0.00      LIG  
ATOM   7145 O2   LIG     1      18.709  -4.242  16.480  1.00  0.00      LIG  
ATOM   7146 O3   LIG     1      17.901  -4.476  19.258  1.00  0.00      LIG  
ATOM   7147 O4   LIG     1      20.936  -2.583  18.477  1.00  0.00      LIG  
ATOM   7148 O5   LIG     1      19.931  -3.272  21.275  1.00  0.00      LIG  
ATOM   7149 H    LIG     1      21.275  -8.609  17.434  1.00  0.00      LIG  
ATOM   7150 H1   LIG     1      22.096  -9.160  18.926  1.00  0.00      LIG  
ATOM   7151 H2   LIG     1      22.623  -7.666  18.106  1.00  0.00      LIG  
ATOM   7152 H3   LIG     1      22.283  -6.228  19.662  1.00  0.00      LIG  
ATOM   7153 H4   LIG     1      19.482  -5.865  20.701  1.00  0.00      LIG  
ATOM   7154 H5   LIG     1      20.460  -5.570  22.888  1.00  0.00      LIG  
ATOM   7155 H6   LIG     1      21.723  -3.779  20.466  1.00  0.00      LIG  
ATOM   7156 H7   LIG     1      20.492  -4.547  18.240  1.00  0.00      LIG  
ATOM   7157 H8   LIG     1      18.469  -2.515  19.336  1.00  0.00      LIG  
ATOM   7158 H9   LIG     1      18.888  -2.255  16.937  1.00  0.00      LIG  
ATOM   7159 H10  LIG     1      17.287  -2.972  17.197  1.00  0.00      LIG  
ATOM   7160 H11  LIG     1      17.948  -4.851  16.521  1.00  0.00      LIG  
ATOM   7161 H12  LIG     1      18.070  -5.248  18.691  1.00  0.00      LIG  
ATOM   7162 H13  LIG     1      21.882  -2.792  18.568  1.00  0.00      LIG  
ATOM   7163 H14  LIG     1      19.974  -2.355  20.952  1.00  0.00      LIG  
TER
REMARK  Energy: 6.69081
REMARK  SimpleFitness: 6.69081
REMARK  FullFitness: -2508.9644
REMARK  InterFull: -19.4266
REMARK  IntraFull: 63.1482
REMARK  solvFull: -2908.33
REMARK  surfFull: 355.644
REMARK  extraFull: 0.0
REMARK  deltaGcompsolvpol: -2908.33
REMARK  deltaGcompsolvnonpol: 355.644
REMARK  deltaGprotsolvpol: -2902.69
REMARK  deltaGprotsolvnonpol: 355.646
REMARK  deltaGligsolvpol: -18.057
REMARK  deltaGligsolvnonpol: 6.73156
REMARK  deltaGvdw: -19.4266
REMARK  deltaGelec: 0.0
REMARK  deltaG: -5.7048373
REMARK  Cluster: 13
REMARK  ClusterRank: 1
ATOM   7134 C    LIG     1      21.911  -8.604  18.132  1.00  0.00      LIG  
ATOM   7135 C1   LIG     1      21.729  -7.721  19.327  1.00  0.00      LIG  
ATOM   7136 O    LIG     1      21.269  -8.136  20.379  1.00  0.00      LIG  
ATOM   7137 N    LIG     1      22.095  -6.418  19.076  1.00  0.00      LIG  
ATOM   7138 C2   LIG     1      21.967  -5.369  20.078  1.00  0.00      LIG  
ATOM   7139 C3   LIG     1      23.132  -4.439  19.855  1.00  0.00      LIG  
ATOM   7140 O1   LIG     1      23.144  -3.294  20.281  1.00  0.00      LIG  
ATOM   7141 C4   LIG     1      20.614  -4.633  20.050  1.00  0.00      LIG  
ATOM   7142 C5   LIG     1      20.023  -4.422  18.646  1.00  0.00      LIG  
ATOM   7143 C6   LIG     1      18.707  -3.630  18.708  1.00  0.00      LIG  
ATOM   7144 C7   LIG     1      18.290  -3.084  17.349  1.00  0.00      LIG  
ATOM   7145 O2   LIG     1      19.003  -1.891  17.051  1.00  0.00      LIG  
ATOM   7146 O3   LIG     1      17.654  -4.466  19.187  1.00  0.00      LIG  
ATOM   7147 O4   LIG     1      20.979  -3.730  17.843  1.00  0.00      LIG  
ATOM   7148 O5   LIG     1      19.703  -5.353  20.871  1.00  0.00      LIG  
ATOM   7149 H    LIG     1      22.135  -9.616  18.475  1.00  0.00      LIG  
ATOM   7150 H1   LIG     1      22.746  -8.259  17.515  1.00  0.00      LIG  
ATOM   7151 H2   LIG     1      20.991  -8.606  17.540  1.00  0.00      LIG  
ATOM   7152 H3   LIG     1      22.397  -6.171  18.140  1.00  0.00      LIG  
ATOM   7153 H4   LIG     1      22.125  -5.832  21.058  1.00  0.00      LIG  
ATOM   7154 H5   LIG     1      24.088  -4.930  19.611  1.00  0.00      LIG  
ATOM   7155 H6   LIG     1      20.725  -3.652  20.521  1.00  0.00      LIG  
ATOM   7156 H7   LIG     1      19.822  -5.392  18.180  1.00  0.00      LIG  
ATOM   7157 H8   LIG     1      18.828  -2.799  19.411  1.00  0.00      LIG  
ATOM   7158 H9   LIG     1      17.223  -2.850  17.334  1.00  0.00      LIG  
ATOM   7159 H10  LIG     1      18.473  -3.816  16.558  1.00  0.00      LIG  
ATOM   7160 H11  LIG     1      19.938  -2.151  16.968  1.00  0.00      LIG  
ATOM   7161 H12  LIG     1      17.279  -4.924  18.412  1.00  0.00      LIG  
ATOM   7162 H13  LIG     1      21.345  -3.015  18.394  1.00  0.00      LIG  
ATOM   7163 H14  LIG     1      18.807  -5.109  20.575  1.00  0.00      LIG  
TER
REMARK  Energy: 11.4582
REMARK  SimpleFitness: 11.4582
REMARK  FullFitness: -2506.4111
REMARK  InterFull: -20.2632
REMARK  IntraFull: 64.5801
REMARK  solvFull: -2906.23
REMARK  surfFull: 355.502
REMARK  extraFull: 0.0
REMARK  deltaGcompsolvpol: -2906.23
REMARK  deltaGcompsolvnonpol: 355.502
REMARK  deltaGprotsolvpol: -2902.69
REMARK  deltaGprotsolvnonpol: 355.646
REMARK  deltaGligsolvpol: -16.0205
REMARK  deltaGligsolvnonpol: 6.60233
REMARK  deltaGvdw: -20.2632
REMARK  deltaGelec: 0.0
REMARK  deltaG: -5.781296
REMARK  Cluster: 13
REMARK  ClusterRank: 2
ATOM   7134 C    LIG     1      22.420  -8.656  18.573  1.00  0.00      LIG  
ATOM   7135 C1   LIG     1      22.790  -7.328  19.160  1.00  0.00      LIG  
ATOM   7136 O    LIG     1      23.761  -7.183  19.886  1.00  0.00      LIG  
ATOM   7137 N    LIG     1      21.895  -6.333  18.837  1.00  0.00      LIG  
ATOM   7138 C2   LIG     1      22.044  -4.958  19.298  1.00  0.00      LIG  
ATOM   7139 C3   LIG     1      22.822  -4.195  18.253  1.00  0.00      LIG  
ATOM   7140 O1   LIG     1      22.804  -2.974  18.184  1.00  0.00      LIG  
ATOM   7141 C4   LIG     1      20.702  -4.276  19.626  1.00  0.00      LIG  
ATOM   7142 C5   LIG     1      19.541  -4.622  18.664  1.00  0.00      LIG  
ATOM   7143 C6   LIG     1      18.286  -3.742  18.789  1.00  0.00      LIG  
ATOM   7144 C7   LIG     1      17.240  -4.278  19.758  1.00  0.00      LIG  
ATOM   7145 O2   LIG     1      17.633  -4.194  21.121  1.00  0.00      LIG  
ATOM   7146 O3   LIG     1      18.628  -2.399  19.121  1.00  0.00      LIG  
ATOM   7147 O4   LIG     1      19.982  -4.475  17.316  1.00  0.00      LIG  
ATOM   7148 O5   LIG     1      20.366  -4.657  20.956  1.00  0.00      LIG  
ATOM   7149 H    LIG     1      21.808  -9.207  19.291  1.00  0.00      LIG  
ATOM   7150 H1   LIG     1      23.337  -9.212  18.365  1.00  0.00      LIG  
ATOM   7151 H2   LIG     1      21.866  -8.532  17.636  1.00  0.00      LIG  
ATOM   7152 H3   LIG     1      21.161  -6.543  18.167  1.00  0.00      LIG  
ATOM   7153 H4   LIG     1      22.685  -4.973  20.186  1.00  0.00      LIG  
ATOM   7154 H5   LIG     1      23.659  -4.746  17.796  1.00  0.00      LIG  
ATOM   7155 H6   LIG     1      20.856  -3.195  19.647  1.00  0.00      LIG  
ATOM   7156 H7   LIG     1      19.241  -5.666  18.793  1.00  0.00      LIG  
ATOM   7157 H8   LIG     1      17.791  -3.690  17.814  1.00  0.00      LIG  
ATOM   7158 H9   LIG     1      17.003  -5.318  19.524  1.00  0.00      LIG  
ATOM   7159 H10  LIG     1      16.326  -3.696  19.668  1.00  0.00      LIG  
ATOM   7160 H11  LIG     1      17.800  -3.251  21.295  1.00  0.00      LIG  
ATOM   7161 H12  LIG     1      19.218  -2.075  18.419  1.00  0.00      LIG  
ATOM   7162 H13  LIG     1      20.308  -3.564  17.219  1.00  0.00      LIG  
ATOM   7163 H14  LIG     1      19.416  -4.472  21.076  1.00  0.00      LIG  
TER
REMARK  Energy: 12.7357
REMARK  SimpleFitness: 12.7357
REMARK  FullFitness: -2505.096
REMARK  InterFull: -23.0015
REMARK  IntraFull: 73.3603
REMARK  solvFull: -2910.91
REMARK  surfFull: 355.455
REMARK  extraFull: 0.0
REMARK  deltaGcompsolvpol: -2910.91
REMARK  deltaGcompsolvnonpol: 355.455
REMARK  deltaGprotsolvpol: -2902.69
REMARK  deltaGprotsolvnonpol: 355.646
REMARK  deltaGligsolvpol: -19.449
REMARK  deltaGligsolvnonpol: 6.79013
REMARK  deltaGvdw: -23.0015
REMARK  deltaGelec: 0.0
REMARK  deltaG: -6.139141
REMARK  Cluster: 13
REMARK  ClusterRank: 3
ATOM   7134 C    LIG     1      22.464  -8.702  18.578  1.00  0.00      LIG  
ATOM   7135 C1   LIG     1      21.329  -7.768  18.864  1.00  0.00      LIG  
ATOM   7136 O    LIG     1      20.168  -8.143  18.904  1.00  0.00      LIG  
ATOM   7137 N    LIG     1      21.751  -6.489  19.147  1.00  0.00      LIG  
ATOM   7138 C2   LIG     1      20.826  -5.420  19.504  1.00  0.00      LIG  
ATOM   7139 C3   LIG     1      20.844  -5.371  21.017  1.00  0.00      LIG  
ATOM   7140 O1   LIG     1      19.939  -4.874  21.670  1.00  0.00      LIG  
ATOM   7141 C4   LIG     1      21.249  -4.106  18.810  1.00  0.00      LIG  
ATOM   7142 C5   LIG     1      20.250  -2.938  18.826  1.00  0.00      LIG  
ATOM   7143 C6   LIG     1      18.933  -3.253  18.084  1.00  0.00      LIG  
ATOM   7144 C7   LIG     1      17.764  -3.841  18.894  1.00  0.00      LIG  
ATOM   7145 O2   LIG     1      17.398  -3.065  20.028  1.00  0.00      LIG  
ATOM   7146 O3   LIG     1      18.484  -2.054  17.454  1.00  0.00      LIG  
ATOM   7147 O4   LIG     1      20.037  -2.445  20.147  1.00  0.00      LIG  
ATOM   7148 O5   LIG     1      22.516  -3.642  19.299  1.00  0.00      LIG  
ATOM   7149 H    LIG     1      22.107  -9.489  17.909  1.00  0.00      LIG  
ATOM   7150 H1   LIG     1      22.813  -9.144  19.515  1.00  0.00      LIG  
ATOM   7151 H2   LIG     1      23.289  -8.175  18.088  1.00  0.00      LIG  
ATOM   7152 H3   LIG     1      22.748  -6.302  19.185  1.00  0.00      LIG  
ATOM   7153 H4   LIG     1      19.825  -5.718  19.192  1.00  0.00      LIG  
ATOM   7154 H5   LIG     1      21.838  -5.479  21.480  1.00  0.00      LIG  
ATOM   7155 H6   LIG     1      21.416  -4.340  17.755  1.00  0.00      LIG  
ATOM   7156 H7   LIG     1      20.745  -2.110  18.309  1.00  0.00      LIG  
ATOM   7157 H8   LIG     1      19.162  -3.940  17.264  1.00  0.00      LIG  
ATOM   7158 H9   LIG     1      17.992  -4.848  19.246  1.00  0.00      LIG  
ATOM   7159 H10  LIG     1      16.873  -3.897  18.265  1.00  0.00      LIG  
ATOM   7160 H11  LIG     1      18.238  -2.774  20.432  1.00  0.00      LIG  
ATOM   7161 H12  LIG     1      17.650  -2.264  16.998  1.00  0.00      LIG  
ATOM   7162 H13  LIG     1      20.902  -2.467  20.593  1.00  0.00      LIG  
ATOM   7163 H14  LIG     1      22.725  -2.826  18.812  1.00  0.00      LIG  
TER
REMARK  Energy: 13.5812
REMARK  SimpleFitness: 13.5812
REMARK  FullFitness: -2503.5422
REMARK  InterFull: -25.1633
REMARK  IntraFull: 69.607
REMARK  solvFull: -2903.64
REMARK  surfFull: 355.654
REMARK  extraFull: 0.0
REMARK  deltaGcompsolvpol: -2903.64
REMARK  deltaGcompsolvnonpol: 355.654
REMARK  deltaGprotsolvpol: -2902.69
REMARK  deltaGprotsolvnonpol: 355.646
REMARK  deltaGligsolvpol: -16.7812
REMARK  deltaGligsolvnonpol: 7.06643
REMARK  deltaGvdw: -25.1633
REMARK  deltaGelec: 0.0
REMARK  deltaG: -6.0693035
REMARK  Cluster: 13
REMARK  ClusterRank: 4
ATOM   7134 C    LIG     1      20.870  -7.441  21.078  1.00  0.00      LIG  
ATOM   7135 C1   LIG     1      20.848  -7.390  19.579  1.00  0.00      LIG  
ATOM   7136 O    LIG     1      20.291  -8.255  18.923  1.00  0.00      LIG  
ATOM   7137 N    LIG     1      21.493  -6.327  18.979  1.00  0.00      LIG  
ATOM   7138 C2   LIG     1      22.091  -5.171  19.639  1.00  0.00      LIG  
ATOM   7139 C3   LIG     1      23.328  -4.865  18.833  1.00  0.00      LIG  
ATOM   7140 O1   LIG     1      23.901  -3.788  18.903  1.00  0.00      LIG  
ATOM   7141 C4   LIG     1      21.179  -3.934  19.712  1.00  0.00      LIG  
ATOM   7142 C5   LIG     1      20.428  -3.639  18.399  1.00  0.00      LIG  
ATOM   7143 C6   LIG     1      19.062  -4.335  18.222  1.00  0.00      LIG  
ATOM   7144 C7   LIG     1      17.836  -3.484  18.561  1.00  0.00      LIG  
ATOM   7145 O2   LIG     1      17.750  -3.170  19.943  1.00  0.00      LIG  
ATOM   7146 O3   LIG     1      18.938  -4.678  16.843  1.00  0.00      LIG  
ATOM   7147 O4   LIG     1      20.244  -2.232  18.297  1.00  0.00      LIG  
ATOM   7148 O5   LIG     1      20.282  -4.079  20.808  1.00  0.00      LIG  
ATOM   7149 H    LIG     1      20.399  -8.372  21.401  1.00  0.00      LIG  
ATOM   7150 H1   LIG     1      20.306  -6.601  21.491  1.00  0.00      LIG  
ATOM   7151 H2   LIG     1      21.901  -7.425  21.442  1.00  0.00      LIG  
ATOM   7152 H3   LIG     1      21.458  -6.318  17.965  1.00  0.00      LIG  
ATOM   7153 H4   LIG     1      22.430  -5.458  20.637  1.00  0.00      LIG  
ATOM   7154 H5   LIG     1      23.892  -5.743  18.478  1.00  0.00      LIG  
ATOM   7155 H6   LIG     1      21.792  -3.065  19.971  1.00  0.00      LIG  
ATOM   7156 H7   LIG     1      21.096  -3.897  17.572  1.00  0.00      LIG  
ATOM   7157 H8   LIG     1      19.043  -5.268  18.790  1.00  0.00      LIG  
ATOM   7158 H9   LIG     1      16.918  -4.009  18.290  1.00  0.00      LIG  
ATOM   7159 H10  LIG     1      17.829  -2.558  17.981  1.00  0.00      LIG  
ATOM   7160 H11  LIG     1      17.769  -4.017  20.421  1.00  0.00      LIG  
ATOM   7161 H12  LIG     1      18.019  -4.983  16.718  1.00  0.00      LIG  
ATOM   7162 H13  LIG     1      19.758  -2.077  17.468  1.00  0.00      LIG  
ATOM   7163 H14  LIG     1      19.678  -3.315  20.765  1.00  0.00      LIG  
TER
REMARK  Energy: 13.5549
REMARK  SimpleFitness: 13.5549
REMARK  FullFitness: -2503.525
REMARK  InterFull: -25.2744
REMARK  IntraFull: 69.5815
REMARK  solvFull: -2903.49
REMARK  surfFull: 355.658
REMARK  extraFull: 0.0
REMARK  deltaGcompsolvpol: -2903.49
REMARK  deltaGcompsolvnonpol: 355.658
REMARK  deltaGprotsolvpol: -2902.69
REMARK  deltaGprotsolvnonpol: 355.646
REMARK  deltaGligsolvpol: -16.6955
REMARK  deltaGligsolvnonpol: 7.06648
REMARK  deltaGvdw: -25.2744
REMARK  deltaGelec: 0.0
REMARK  deltaG: -6.0755115
REMARK  Cluster: 13
REMARK  ClusterRank: 5
ATOM   7134 C    LIG     1      20.833  -7.453  21.096  1.00  0.00      LIG  
ATOM   7135 C1   LIG     1      20.768  -7.417  19.598  1.00  0.00      LIG  
ATOM   7136 O    LIG     1      20.156  -8.264  18.970  1.00  0.00      LIG  
ATOM   7137 N    LIG     1      21.443  -6.393  18.966  1.00  0.00      LIG  
ATOM   7138 C2   LIG     1      22.096  -5.249  19.594  1.00  0.00      LIG  
ATOM   7139 C3   LIG     1      23.333  -5.008  18.767  1.00  0.00      LIG  
ATOM   7140 O1   LIG     1      23.952  -3.955  18.810  1.00  0.00      LIG  
ATOM   7141 C4   LIG     1      21.232  -3.977  19.657  1.00  0.00      LIG  
ATOM   7142 C5   LIG     1      20.476  -3.672  18.349  1.00  0.00      LIG  
ATOM   7143 C6   LIG     1      19.090  -4.332  18.187  1.00  0.00      LIG  
ATOM   7144 C7   LIG     1      17.886  -3.453  18.533  1.00  0.00      LIG  
ATOM   7145 O2   LIG     1      17.819  -3.133  19.916  1.00  0.00      LIG  
ATOM   7146 O3   LIG     1      18.944  -4.677  16.812  1.00  0.00      LIG  
ATOM   7147 O4   LIG     1      20.328  -2.261  18.239  1.00  0.00      LIG  
ATOM   7148 O5   LIG     1      20.344  -4.070  20.765  1.00  0.00      LIG  
ATOM   7149 H    LIG     1      20.321  -8.353  21.444  1.00  0.00      LIG  
ATOM   7150 H1   LIG     1      20.332  -6.578  21.516  1.00  0.00      LIG  
ATOM   7151 H2   LIG     1      21.875  -7.492  21.427  1.00  0.00      LIG  
ATOM   7152 H3   LIG     1      21.380  -6.395  17.954  1.00  0.00      LIG  
ATOM   7153 H4   LIG     1      22.438  -5.530  20.593  1.00  0.00      LIG  
ATOM   7154 H5   LIG     1      23.855  -5.916  18.420  1.00  0.00      LIG  
ATOM   7155 H6   LIG     1      21.883  -3.128  19.895  1.00  0.00      LIG  
ATOM   7156 H7   LIG     1      21.129  -3.953  17.518  1.00  0.00      LIG  
ATOM   7157 H8   LIG     1      19.050  -5.262  18.758  1.00  0.00      LIG  
ATOM   7158 H9   LIG     1      16.955  -3.960  18.270  1.00  0.00      LIG  
ATOM   7159 H10  LIG     1      17.893  -2.527  17.951  1.00  0.00      LIG  
ATOM   7160 H11  LIG     1      17.844  -3.979  20.396  1.00  0.00      LIG  
ATOM   7161 H12  LIG     1      18.019  -4.967  16.698  1.00  0.00      LIG  
ATOM   7162 H13  LIG     1      19.847  -2.099  17.408  1.00  0.00      LIG  
ATOM   7163 H14  LIG     1      19.769  -3.285  20.718  1.00  0.00      LIG  
TER
REMARK  Energy: 3.13277
REMARK  SimpleFitness: 3.13277
REMARK  FullFitness: -2513.7417
REMARK  InterFull: -30.3418
REMARK  IntraFull: 65.7051
REMARK  solvFull: -2904.55
REMARK  surfFull: 355.445
REMARK  extraFull: 0.0
REMARK  deltaGcompsolvpol: -2904.55
REMARK  deltaGcompsolvnonpol: 355.445
REMARK  deltaGprotsolvpol: -2902.69
REMARK  deltaGprotsolvnonpol: 355.646
REMARK  deltaGligsolvpol: -18.7794
REMARK  deltaGligsolvnonpol: 6.76825
REMARK  deltaGvdw: -30.3418
REMARK  deltaGelec: 0.0
REMARK  deltaG: -6.4841638
REMARK  Cluster: 14
REMARK  ClusterRank: 0
ATOM   7134 C    LIG     1      20.574  25.450  18.051  1.00  0.00      LIG  
ATOM   7135 C1   LIG     1      19.330  24.914  18.693  1.00  0.00      LIG  
ATOM   7136 O    LIG     1      19.277  24.644  19.883  1.00  0.00      LIG  
ATOM   7137 N    LIG     1      18.270  24.857  17.820  1.00  0.00      LIG  
ATOM   7138 C2   LIG     1      16.961  24.361  18.215  1.00  0.00      LIG  
ATOM   7139 C3   LIG     1      15.929  25.058  17.363  1.00  0.00      LIG  
ATOM   7140 O1   LIG     1      16.152  25.500  16.244  1.00  0.00      LIG  
ATOM   7141 C4   LIG     1      16.796  22.830  18.123  1.00  0.00      LIG  
ATOM   7142 C5   LIG     1      17.547  22.111  16.990  1.00  0.00      LIG  
ATOM   7143 C6   LIG     1      16.885  20.762  16.683  1.00  0.00      LIG  
ATOM   7144 C7   LIG     1      17.529  20.054  15.493  1.00  0.00      LIG  
ATOM   7145 O2   LIG     1      18.940  19.964  15.654  1.00  0.00      LIG  
ATOM   7146 O3   LIG     1      16.934  19.905  17.824  1.00  0.00      LIG  
ATOM   7147 O4   LIG     1      17.548  22.878  15.793  1.00  0.00      LIG  
ATOM   7148 O5   LIG     1      17.214  22.264  19.359  1.00  0.00      LIG  
ATOM   7149 H    LIG     1      21.438  24.932  18.474  1.00  0.00      LIG  
ATOM   7150 H1   LIG     1      20.648  26.522  18.255  1.00  0.00      LIG  
ATOM   7151 H2   LIG     1      20.565  25.285  16.969  1.00  0.00      LIG  
ATOM   7152 H3   LIG     1      18.428  25.071  16.840  1.00  0.00      LIG  
ATOM   7153 H4   LIG     1      16.785  24.693  19.244  1.00  0.00      LIG  
ATOM   7154 H5   LIG     1      14.898  25.004  17.746  1.00  0.00      LIG  
ATOM   7155 H6   LIG     1      15.730  22.597  18.031  1.00  0.00      LIG  
ATOM   7156 H7   LIG     1      18.587  21.948  17.291  1.00  0.00      LIG  
ATOM   7157 H8   LIG     1      15.829  20.923  16.448  1.00  0.00      LIG  
ATOM   7158 H9   LIG     1      17.327  20.590  14.562  1.00  0.00      LIG  
ATOM   7159 H10  LIG     1      17.147  19.035  15.398  1.00  0.00      LIG  
ATOM   7160 H11  LIG     1      19.092  19.627  16.553  1.00  0.00      LIG  
ATOM   7161 H12  LIG     1      16.471  19.085  17.572  1.00  0.00      LIG  
ATOM   7162 H13  LIG     1      16.646  23.222  15.673  1.00  0.00      LIG  
ATOM   7163 H14  LIG     1      17.239  21.299  19.219  1.00  0.00      LIG  
TER
REMARK  Energy: 3.16274
REMARK  SimpleFitness: 3.16274
REMARK  FullFitness: -2513.6172
REMARK  InterFull: -30.3584
REMARK  IntraFull: 65.818
REMARK  solvFull: -2904.52
REMARK  surfFull: 355.443
REMARK  extraFull: 0.0
REMARK  deltaGcompsolvpol: -2904.52
REMARK  deltaGcompsolvnonpol: 355.443
REMARK  deltaGprotsolvpol: -2902.69
REMARK  deltaGprotsolvnonpol: 355.646
REMARK  deltaGligsolvpol: -18.7863
REMARK  deltaGligsolvnonpol: 6.76944
REMARK  deltaGvdw: -30.3584
REMARK  deltaGelec: 0.0
REMARK  deltaG: -6.483777
REMARK  Cluster: 14
REMARK  ClusterRank: 1
ATOM   7134 C    LIG     1      20.551  25.556  18.022  1.00  0.00      LIG  
ATOM   7135 C1   LIG     1      19.334  24.994  18.692  1.00  0.00      LIG  
ATOM   7136 O    LIG     1      19.323  24.700  19.878  1.00  0.00      LIG  
ATOM   7137 N    LIG     1      18.245  24.947  17.854  1.00  0.00      LIG  
ATOM   7138 C2   LIG     1      16.953  24.435  18.281  1.00  0.00      LIG  
ATOM   7139 C3   LIG     1      15.892  25.124  17.459  1.00  0.00      LIG  
ATOM   7140 O1   LIG     1      16.079  25.565  16.333  1.00  0.00      LIG  
ATOM   7141 C4   LIG     1      16.800  22.903  18.190  1.00  0.00      LIG  
ATOM   7142 C5   LIG     1      17.524  22.193  17.034  1.00  0.00      LIG  
ATOM   7143 C6   LIG     1      16.852  20.849  16.731  1.00  0.00      LIG  
ATOM   7144 C7   LIG     1      17.466  20.149  15.520  1.00  0.00      LIG  
ATOM   7145 O2   LIG     1      18.881  20.053  15.647  1.00  0.00      LIG  
ATOM   7146 O3   LIG     1      16.924  19.982  17.863  1.00  0.00      LIG  
ATOM   7147 O4   LIG     1      17.497  22.971  15.845  1.00  0.00      LIG  
ATOM   7148 O5   LIG     1      17.257  22.336  19.413  1.00  0.00      LIG  
ATOM   7149 H    LIG     1      21.433  25.032  18.400  1.00  0.00      LIG  
ATOM   7150 H1   LIG     1      20.625  26.622  18.252  1.00  0.00      LIG  
ATOM   7151 H2   LIG     1      20.504  25.420  16.936  1.00  0.00      LIG  
ATOM   7152 H3   LIG     1      18.370  25.180  16.874  1.00  0.00      LIG  
ATOM   7153 H4   LIG     1      16.802  24.763  19.315  1.00  0.00      LIG  
ATOM   7154 H5   LIG     1      14.873  25.062  17.871  1.00  0.00      LIG  
ATOM   7155 H6   LIG     1      15.734  22.660  18.128  1.00  0.00      LIG  
ATOM   7156 H7   LIG     1      18.570  22.027  17.308  1.00  0.00      LIG  
ATOM   7157 H8   LIG     1      15.792  21.014  16.521  1.00  0.00      LIG  
ATOM   7158 H9   LIG     1      17.245  20.694  14.598  1.00  0.00      LIG  
ATOM   7159 H10  LIG     1      17.078  19.132  15.425  1.00  0.00      LIG  
ATOM   7160 H11  LIG     1      19.052  19.708  16.540  1.00  0.00      LIG  
ATOM   7161 H12  LIG     1      16.457  19.165  17.614  1.00  0.00      LIG  
ATOM   7162 H13  LIG     1      16.589  23.305  15.741  1.00  0.00      LIG  
ATOM   7163 H14  LIG     1      17.283  21.372  19.270  1.00  0.00      LIG  
TER
REMARK  Energy: 3.16994
REMARK  SimpleFitness: 3.16994
REMARK  FullFitness: -2513.6082
REMARK  InterFull: -30.3928
REMARK  IntraFull: 65.8537
REMARK  solvFull: -2904.51
REMARK  surfFull: 355.441
REMARK  extraFull: 0.0
REMARK  deltaGcompsolvpol: -2904.51
REMARK  deltaGcompsolvnonpol: 355.441
REMARK  deltaGprotsolvpol: -2902.69
REMARK  deltaGprotsolvnonpol: 355.646
REMARK  deltaGligsolvpol: -18.7938
REMARK  deltaGligsolvnonpol: 6.76901
REMARK  deltaGvdw: -30.3928
REMARK  deltaGelec: 0.0
REMARK  deltaG: -6.4861064
REMARK  Cluster: 14
REMARK  ClusterRank: 2
ATOM   7134 C    LIG     1      20.548  25.584  17.997  1.00  0.00      LIG  
ATOM   7135 C1   LIG     1      19.338  25.019  18.678  1.00  0.00      LIG  
ATOM   7136 O    LIG     1      19.339  24.723  19.863  1.00  0.00      LIG  
ATOM   7137 N    LIG     1      18.242  24.971  17.850  1.00  0.00      LIG  
ATOM   7138 C2   LIG     1      16.954  24.459  18.289  1.00  0.00      LIG  
ATOM   7139 C3   LIG     1      15.886  25.143  17.472  1.00  0.00      LIG  
ATOM   7140 O1   LIG     1      16.062  25.577  16.342  1.00  0.00      LIG  
ATOM   7141 C4   LIG     1      16.801  22.926  18.205  1.00  0.00      LIG  
ATOM   7142 C5   LIG     1      17.516  22.211  17.046  1.00  0.00      LIG  
ATOM   7143 C6   LIG     1      16.840  20.867  16.752  1.00  0.00      LIG  
ATOM   7144 C7   LIG     1      17.441  20.164  15.537  1.00  0.00      LIG  
ATOM   7145 O2   LIG     1      18.856  20.066  15.650  1.00  0.00      LIG  
ATOM   7146 O3   LIG     1      16.922  20.003  17.886  1.00  0.00      LIG  
ATOM   7147 O4   LIG     1      17.482  22.985  15.855  1.00  0.00      LIG  
ATOM   7148 O5   LIG     1      17.268  22.364  19.427  1.00  0.00      LIG  
ATOM   7149 H    LIG     1      21.435  25.062  18.367  1.00  0.00      LIG  
ATOM   7150 H1   LIG     1      20.621  26.650  18.228  1.00  0.00      LIG  
ATOM   7151 H2   LIG     1      20.492  25.450  16.912  1.00  0.00      LIG  
ATOM   7152 H3   LIG     1      18.357  25.204  16.869  1.00  0.00      LIG  
ATOM   7153 H4   LIG     1      16.811  24.790  19.323  1.00  0.00      LIG  
ATOM   7154 H5   LIG     1      14.870  25.083  17.893  1.00  0.00      LIG  
ATOM   7155 H6   LIG     1      15.735  22.682  18.151  1.00  0.00      LIG  
ATOM   7156 H7   LIG     1      18.565  22.044  17.313  1.00  0.00      LIG  
ATOM   7157 H8   LIG     1      15.778  21.033  16.553  1.00  0.00      LIG  
ATOM   7158 H9   LIG     1      17.212  20.707  14.616  1.00  0.00      LIG  
ATOM   7159 H10  LIG     1      17.050  19.147  15.448  1.00  0.00      LIG  
ATOM   7160 H11  LIG     1      19.036  19.719  16.541  1.00  0.00      LIG  
ATOM   7161 H12  LIG     1      16.452  19.186  17.645  1.00  0.00      LIG  
ATOM   7162 H13  LIG     1      16.573  23.317  15.754  1.00  0.00      LIG  
ATOM   7163 H14  LIG     1      17.294  21.399  19.287  1.00  0.00      LIG  
TER
REMARK  Energy: 7.21179
REMARK  SimpleFitness: 7.21179
REMARK  FullFitness: -2510.1604
REMARK  InterFull: -29.4842
REMARK  IntraFull: 72.5696
REMARK  solvFull: -2908.68
REMARK  surfFull: 355.434
REMARK  extraFull: 0.0
REMARK  deltaGcompsolvpol: -2908.68
REMARK  deltaGcompsolvnonpol: 355.434
REMARK  deltaGprotsolvpol: -2902.69
REMARK  deltaGprotsolvnonpol: 355.646
REMARK  deltaGligsolvpol: -20.3557
REMARK  deltaGligsolvnonpol: 6.71837
REMARK  deltaGvdw: -29.4842
REMARK  deltaGelec: 0.0
REMARK  deltaG: -6.5556374
REMARK  Cluster: 14
REMARK  ClusterRank: 3
ATOM   7134 C    LIG     1      19.823  25.532  17.030  1.00  0.00      LIG  
ATOM   7135 C1   LIG     1      18.516  24.825  16.834  1.00  0.00      LIG  
ATOM   7136 O    LIG     1      18.112  24.512  15.725  1.00  0.00      LIG  
ATOM   7137 N    LIG     1      17.883  24.545  18.031  1.00  0.00      LIG  
ATOM   7138 C2   LIG     1      16.582  23.887  18.154  1.00  0.00      LIG  
ATOM   7139 C3   LIG     1      15.541  24.922  17.757  1.00  0.00      LIG  
ATOM   7140 O1   LIG     1      15.711  26.130  17.858  1.00  0.00      LIG  
ATOM   7141 C4   LIG     1      16.416  22.542  17.403  1.00  0.00      LIG  
ATOM   7142 C5   LIG     1      17.371  21.439  17.890  1.00  0.00      LIG  
ATOM   7143 C6   LIG     1      17.106  20.095  17.179  1.00  0.00      LIG  
ATOM   7144 C7   LIG     1      17.303  20.103  15.658  1.00  0.00      LIG  
ATOM   7145 O2   LIG     1      18.583  20.584  15.266  1.00  0.00      LIG  
ATOM   7146 O3   LIG     1      17.917  19.069  17.754  1.00  0.00      LIG  
ATOM   7147 O4   LIG     1      18.736  21.824  17.737  1.00  0.00      LIG  
ATOM   7148 O5   LIG     1      15.092  22.040  17.604  1.00  0.00      LIG  
ATOM   7149 H    LIG     1      19.934  26.288  16.248  1.00  0.00      LIG  
ATOM   7150 H1   LIG     1      20.636  24.804  16.961  1.00  0.00      LIG  
ATOM   7151 H2   LIG     1      19.864  26.031  18.004  1.00  0.00      LIG  
ATOM   7152 H3   LIG     1      18.284  24.947  18.872  1.00  0.00      LIG  
ATOM   7153 H4   LIG     1      16.421  23.699  19.218  1.00  0.00      LIG  
ATOM   7154 H5   LIG     1      14.525  24.531  17.613  1.00  0.00      LIG  
ATOM   7155 H6   LIG     1      16.551  22.702  16.331  1.00  0.00      LIG  
ATOM   7156 H7   LIG     1      17.216  21.285  18.963  1.00  0.00      LIG  
ATOM   7157 H8   LIG     1      16.077  19.790  17.370  1.00  0.00      LIG  
ATOM   7158 H9   LIG     1      16.552  20.735  15.178  1.00  0.00      LIG  
ATOM   7159 H10  LIG     1      17.206  19.092  15.255  1.00  0.00      LIG  
ATOM   7160 H11  LIG     1      18.920  21.095  16.025  1.00  0.00      LIG  
ATOM   7161 H12  LIG     1      17.892  19.198  18.717  1.00  0.00      LIG  
ATOM   7162 H13  LIG     1      18.797  22.750  18.034  1.00  0.00      LIG  
ATOM   7163 H14  LIG     1      14.510  22.532  16.994  1.00  0.00      LIG  
TER
REMARK  Energy: 7.25142
REMARK  SimpleFitness: 7.25142
REMARK  FullFitness: -2509.2144
REMARK  InterFull: -26.0103
REMARK  IntraFull: 68.5969
REMARK  solvFull: -2907.28
REMARK  surfFull: 355.479
REMARK  extraFull: 0.0
REMARK  deltaGcompsolvpol: -2907.28
REMARK  deltaGcompsolvnonpol: 355.479
REMARK  deltaGprotsolvpol: -2902.69
REMARK  deltaGprotsolvnonpol: 355.646
REMARK  deltaGligsolvpol: -17.5792
REMARK  deltaGligsolvnonpol: 6.70753
REMARK  deltaGvdw: -26.0103
REMARK  deltaGelec: 0.0
REMARK  deltaG: -6.3059707
REMARK  Cluster: 14
REMARK  ClusterRank: 4
ATOM   7134 C    LIG     1      19.805  25.432  16.873  1.00  0.00      LIG  
ATOM   7135 C1   LIG     1      18.504  24.703  16.727  1.00  0.00      LIG  
ATOM   7136 O    LIG     1      18.090  24.329  15.640  1.00  0.00      LIG  
ATOM   7137 N    LIG     1      17.903  24.456  17.947  1.00  0.00      LIG  
ATOM   7138 C2   LIG     1      16.626  23.765  18.128  1.00  0.00      LIG  
ATOM   7139 C3   LIG     1      15.537  24.728  17.683  1.00  0.00      LIG  
ATOM   7140 O1   LIG     1      15.662  25.946  17.683  1.00  0.00      LIG  
ATOM   7141 C4   LIG     1      16.500  22.367  17.475  1.00  0.00      LIG  
ATOM   7142 C5   LIG     1      17.535  21.364  18.014  1.00  0.00      LIG  
ATOM   7143 C6   LIG     1      17.247  19.918  17.569  1.00  0.00      LIG  
ATOM   7144 C7   LIG     1      17.279  19.681  16.055  1.00  0.00      LIG  
ATOM   7145 O2   LIG     1      18.508  20.074  15.453  1.00  0.00      LIG  
ATOM   7146 O3   LIG     1      18.163  19.026  18.207  1.00  0.00      LIG  
ATOM   7147 O4   LIG     1      18.858  21.744  17.636  1.00  0.00      LIG  
ATOM   7148 O5   LIG     1      15.206  21.832  17.766  1.00  0.00      LIG  
ATOM   7149 H    LIG     1      19.948  26.075  16.001  1.00  0.00      LIG  
ATOM   7150 H1   LIG     1      20.618  24.704  16.933  1.00  0.00      LIG  
ATOM   7151 H2   LIG     1      19.807  26.059  17.771  1.00  0.00      LIG  
ATOM   7152 H3   LIG     1      18.315  24.896  18.764  1.00  0.00      LIG  
ATOM   7153 H4   LIG     1      16.486  23.645  19.205  1.00  0.00      LIG  
ATOM   7154 H5   LIG     1      14.533  24.289  17.607  1.00  0.00      LIG  
ATOM   7155 H6   LIG     1      16.587  22.461  16.389  1.00  0.00      LIG  
ATOM   7156 H7   LIG     1      17.510  21.386  19.108  1.00  0.00      LIG  
ATOM   7157 H8   LIG     1      16.260  19.624  17.929  1.00  0.00      LIG  
ATOM   7158 H9   LIG     1      16.474  20.231  15.562  1.00  0.00      LIG  
ATOM   7159 H10  LIG     1      17.149  18.617  15.842  1.00  0.00      LIG  
ATOM   7160 H11  LIG     1      18.825  20.846  15.957  1.00  0.00      LIG  
ATOM   7161 H12  LIG     1      19.049  19.279  17.895  1.00  0.00      LIG  
ATOM   7162 H13  LIG     1      18.936  22.695  17.830  1.00  0.00      LIG  
ATOM   7163 H14  LIG     1      15.111  21.012  17.251  1.00  0.00      LIG  
TER
REMARK  Energy: 8.20952
REMARK  SimpleFitness: 8.20952
REMARK  FullFitness: -2507.6243
REMARK  InterFull: -25.9502
REMARK  IntraFull: 71.8827
REMARK  solvFull: -2908.99
REMARK  surfFull: 355.433
REMARK  extraFull: 0.0
REMARK  deltaGcompsolvpol: -2908.99
REMARK  deltaGcompsolvnonpol: 355.433
REMARK  deltaGprotsolvpol: -2902.69
REMARK  deltaGprotsolvnonpol: 355.646
REMARK  deltaGligsolvpol: -19.663
REMARK  deltaGligsolvnonpol: 6.71935
REMARK  deltaGvdw: -25.9502
REMARK  deltaGelec: 0.0
REMARK  deltaG: -6.2828746
REMARK  Cluster: 14
REMARK  ClusterRank: 5
ATOM   7134 C    LIG     1      19.741  25.502  17.060  1.00  0.00      LIG  
ATOM   7135 C1   LIG     1      18.450  24.759  16.893  1.00  0.00      LIG  
ATOM   7136 O    LIG     1      17.992  24.503  15.790  1.00  0.00      LIG  
ATOM   7137 N    LIG     1      17.899  24.379  18.103  1.00  0.00      LIG  
ATOM   7138 C2   LIG     1      16.631  23.663  18.255  1.00  0.00      LIG  
ATOM   7139 C3   LIG     1      15.540  24.678  17.960  1.00  0.00      LIG  
ATOM   7140 O1   LIG     1      15.642  25.871  18.214  1.00  0.00      LIG  
ATOM   7141 C4   LIG     1      16.472  22.355  17.442  1.00  0.00      LIG  
ATOM   7142 C5   LIG     1      17.500  21.271  17.814  1.00  0.00      LIG  
ATOM   7143 C6   LIG     1      17.246  19.952  17.057  1.00  0.00      LIG  
ATOM   7144 C7   LIG     1      17.332  20.045  15.529  1.00  0.00      LIG  
ATOM   7145 O2   LIG     1      18.543  20.640  15.080  1.00  0.00      LIG  
ATOM   7146 O3   LIG     1      18.145  18.942  17.518  1.00  0.00      LIG  
ATOM   7147 O4   LIG     1      18.836  21.724  17.600  1.00  0.00      LIG  
ATOM   7148 O5   LIG     1      15.183  21.794  17.706  1.00  0.00      LIG  
ATOM   7149 H    LIG     1      19.786  26.298  16.314  1.00  0.00      LIG  
ATOM   7150 H1   LIG     1      20.573  24.807  16.913  1.00  0.00      LIG  
ATOM   7151 H2   LIG     1      19.814  25.953  18.055  1.00  0.00      LIG  
ATOM   7152 H3   LIG     1      18.335  24.739  18.946  1.00  0.00      LIG  
ATOM   7153 H4   LIG     1      16.528  23.416  19.314  1.00  0.00      LIG  
ATOM   7154 H5   LIG     1      14.551  24.252  17.746  1.00  0.00      LIG  
ATOM   7155 H6   LIG     1      16.526  22.584  16.375  1.00  0.00      LIG  
ATOM   7156 H7   LIG     1      17.419  21.060  18.884  1.00  0.00      LIG  
ATOM   7157 H8   LIG     1      16.248  19.585  17.304  1.00  0.00      LIG  
ATOM   7158 H9   LIG     1      16.506  20.640  15.135  1.00  0.00      LIG  
ATOM   7159 H10  LIG     1      17.281  19.049  15.081  1.00  0.00      LIG  
ATOM   7160 H11  LIG     1      18.919  21.103  15.852  1.00  0.00      LIG  
ATOM   7161 H12  LIG     1      18.226  19.055  18.480  1.00  0.00      LIG  
ATOM   7162 H13  LIG     1      18.873  22.640  17.929  1.00  0.00      LIG  
ATOM   7163 H14  LIG     1      15.063  21.047  17.094  1.00  0.00      LIG  
TER
REMARK  Energy: 12.2672
REMARK  SimpleFitness: 12.2672
REMARK  FullFitness: -2501.007
REMARK  InterFull: -25.3152
REMARK  IntraFull: 75.988
REMARK  solvFull: -2907.23
REMARK  surfFull: 355.55
REMARK  extraFull: 0.0
REMARK  deltaGcompsolvpol: -2907.23
REMARK  deltaGcompsolvnonpol: 355.55
REMARK  deltaGprotsolvpol: -2902.69
REMARK  deltaGprotsolvnonpol: 355.646
REMARK  deltaGligsolvpol: -20.5554
REMARK  deltaGligsolvnonpol: 6.89394
REMARK  deltaGvdw: -25.3152
REMARK  deltaGelec: 0.0
REMARK  deltaG: -6.065927
REMARK  Cluster: 14
REMARK  ClusterRank: 6
ATOM   7134 C    LIG     1      20.212  24.911  17.706  1.00  0.00      LIG  
ATOM   7135 C1   LIG     1      19.344  24.728  16.495  1.00  0.00      LIG  
ATOM   7136 O    LIG     1      19.824  24.666  15.375  1.00  0.00      LIG  
ATOM   7137 N    LIG     1      17.983  24.641  16.714  1.00  0.00      LIG  
ATOM   7138 C2   LIG     1      17.302  24.594  18.005  1.00  0.00      LIG  
ATOM   7139 C3   LIG     1      16.039  25.392  17.836  1.00  0.00      LIG  
ATOM   7140 O1   LIG     1      15.367  25.702  18.808  1.00  0.00      LIG  
ATOM   7141 C4   LIG     1      16.934  23.176  18.476  1.00  0.00      LIG  
ATOM   7142 C5   LIG     1      16.444  22.250  17.340  1.00  0.00      LIG  
ATOM   7143 C6   LIG     1      17.344  21.046  17.039  1.00  0.00      LIG  
ATOM   7144 C7   LIG     1      16.729  20.177  15.946  1.00  0.00      LIG  
ATOM   7145 O2   LIG     1      17.423  18.938  15.852  1.00  0.00      LIG  
ATOM   7146 O3   LIG     1      18.626  21.497  16.595  1.00  0.00      LIG  
ATOM   7147 O4   LIG     1      15.149  21.771  17.693  1.00  0.00      LIG  
ATOM   7148 O5   LIG     1      18.030  22.620  19.200  1.00  0.00      LIG  
ATOM   7149 H    LIG     1      19.912  25.809  18.253  1.00  0.00      LIG  
ATOM   7150 H1   LIG     1      21.247  25.031  17.377  1.00  0.00      LIG  
ATOM   7151 H2   LIG     1      20.145  24.031  18.351  1.00  0.00      LIG  
ATOM   7152 H3   LIG     1      17.417  24.511  15.883  1.00  0.00      LIG  
ATOM   7153 H4   LIG     1      17.897  25.106  18.766  1.00  0.00      LIG  
ATOM   7154 H5   LIG     1      15.557  25.332  16.847  1.00  0.00      LIG  
ATOM   7155 H6   LIG     1      16.145  23.267  19.229  1.00  0.00      LIG  
ATOM   7156 H7   LIG     1      16.303  22.825  16.423  1.00  0.00      LIG  
ATOM   7157 H8   LIG     1      17.491  20.439  17.937  1.00  0.00      LIG  
ATOM   7158 H9   LIG     1      16.793  20.671  14.972  1.00  0.00      LIG  
ATOM   7159 H10  LIG     1      15.684  19.944  16.157  1.00  0.00      LIG  
ATOM   7160 H11  LIG     1      16.862  18.358  15.305  1.00  0.00      LIG  
ATOM   7161 H12  LIG     1      18.503  21.893  15.716  1.00  0.00      LIG  
ATOM   7162 H13  LIG     1      14.527  22.498  17.511  1.00  0.00      LIG  
ATOM   7163 H14  LIG     1      17.832  21.677  19.333  1.00  0.00      LIG  
TER
REMARK  Energy: 12.9132
REMARK  SimpleFitness: 12.9132
REMARK  FullFitness: -2499.0264
REMARK  InterFull: -21.7981
REMARK  IntraFull: 74.1636
REMARK  solvFull: -2906.93
REMARK  surfFull: 355.538
REMARK  extraFull: 0.0
REMARK  deltaGcompsolvpol: -2906.93
REMARK  deltaGcompsolvnonpol: 355.538
REMARK  deltaGprotsolvpol: -2902.69
REMARK  deltaGprotsolvnonpol: 355.646
REMARK  deltaGligsolvpol: -19.5831
REMARK  deltaGligsolvnonpol: 6.89747
REMARK  deltaGvdw: -21.7981
REMARK  deltaGelec: 0.0
REMARK  deltaG: -5.77582
REMARK  Cluster: 14
REMARK  ClusterRank: 7
ATOM   7134 C    LIG     1      20.136  25.047  18.047  1.00  0.00      LIG  
ATOM   7135 C1   LIG     1      19.380  24.913  16.757  1.00  0.00      LIG  
ATOM   7136 O    LIG     1      19.949  24.985  15.680  1.00  0.00      LIG  
ATOM   7137 N    LIG     1      18.020  24.692  16.853  1.00  0.00      LIG  
ATOM   7138 C2   LIG     1      17.246  24.509  18.078  1.00  0.00      LIG  
ATOM   7139 C3   LIG     1      15.966  25.269  17.867  1.00  0.00      LIG  
ATOM   7140 O1   LIG     1      15.214  25.491  18.803  1.00  0.00      LIG  
ATOM   7141 C4   LIG     1      16.910  23.043  18.404  1.00  0.00      LIG  
ATOM   7142 C5   LIG     1      16.552  22.190  17.167  1.00  0.00      LIG  
ATOM   7143 C6   LIG     1      17.574  21.115  16.773  1.00  0.00      LIG  
ATOM   7144 C7   LIG     1      17.104  20.365  15.529  1.00  0.00      LIG  
ATOM   7145 O2   LIG     1      17.964  19.262  15.264  1.00  0.00      LIG  
ATOM   7146 O3   LIG     1      18.842  21.707  16.486  1.00  0.00      LIG  
ATOM   7147 O4   LIG     1      15.309  21.544  17.426  1.00  0.00      LIG  
ATOM   7148 O5   LIG     1      17.972  22.467  19.162  1.00  0.00      LIG  
ATOM   7149 H    LIG     1      19.743  25.889  18.625  1.00  0.00      LIG  
ATOM   7150 H1   LIG     1      21.186  25.239  17.815  1.00  0.00      LIG  
ATOM   7151 H2   LIG     1      20.064  24.121  18.623  1.00  0.00      LIG  
ATOM   7152 H3   LIG     1      17.529  24.600  15.971  1.00  0.00      LIG  
ATOM   7153 H4   LIG     1      17.752  24.979  18.925  1.00  0.00      LIG  
ATOM   7154 H5   LIG     1      15.560  25.258  16.842  1.00  0.00      LIG  
ATOM   7155 H6   LIG     1      16.061  23.042  19.097  1.00  0.00      LIG  
ATOM   7156 H7   LIG     1      16.374  22.843  16.310  1.00  0.00      LIG  
ATOM   7157 H8   LIG     1      17.716  20.397  17.587  1.00  0.00      LIG  
ATOM   7158 H9   LIG     1      17.127  21.019  14.652  1.00  0.00      LIG  
ATOM   7159 H10  LIG     1      16.091  19.975  15.650  1.00  0.00      LIG  
ATOM   7160 H11  LIG     1      18.868  19.579  15.435  1.00  0.00      LIG  
ATOM   7161 H12  LIG     1      18.691  22.416  15.838  1.00  0.00      LIG  
ATOM   7162 H13  LIG     1      14.613  22.205  17.255  1.00  0.00      LIG  
ATOM   7163 H14  LIG     1      17.774  21.519  19.250  1.00  0.00      LIG  
TER
REMARK  Energy: 1.16136
REMARK  SimpleFitness: 1.16136
REMARK  FullFitness: -2513.3796
REMARK  InterFull: -37.6127
REMARK  IntraFull: 65.6561
REMARK  solvFull: -2898.05
REMARK  surfFull: 356.627
REMARK  extraFull: 0.0
REMARK  deltaGcompsolvpol: -2898.05
REMARK  deltaGcompsolvnonpol: 356.627
REMARK  deltaGprotsolvpol: -2902.69
REMARK  deltaGprotsolvnonpol: 355.646
REMARK  deltaGligsolvpol: -18.1705
REMARK  deltaGligsolvnonpol: 6.74664
REMARK  deltaGvdw: -37.6127
REMARK  deltaGelec: 0.0
REMARK  deltaG: -6.697593
REMARK  Cluster: 15
REMARK  ClusterRank: 0
ATOM   7134 C    LIG     1      -6.612  36.476  17.172  1.00  0.00      LIG  
ATOM   7135 C1   LIG     1      -5.747  36.758  15.984  1.00  0.00      LIG  
ATOM   7136 O    LIG     1      -4.850  37.584  16.017  1.00  0.00      LIG  
ATOM   7137 N    LIG     1      -6.169  36.111  14.847  1.00  0.00      LIG  
ATOM   7138 C2   LIG     1      -5.504  36.293  13.566  1.00  0.00      LIG  
ATOM   7139 C3   LIG     1      -5.359  34.895  13.008  1.00  0.00      LIG  
ATOM   7140 O1   LIG     1      -6.142  33.981  13.227  1.00  0.00      LIG  
ATOM   7141 C4   LIG     1      -6.269  37.190  12.571  1.00  0.00      LIG  
ATOM   7142 C5   LIG     1      -6.612  38.573  13.146  1.00  0.00      LIG  
ATOM   7143 C6   LIG     1      -6.971  39.608  12.069  1.00  0.00      LIG  
ATOM   7144 C7   LIG     1      -8.332  39.326  11.437  1.00  0.00      LIG  
ATOM   7145 O2   LIG     1      -8.498  40.128  10.274  1.00  0.00      LIG  
ATOM   7146 O3   LIG     1      -7.007  40.909  12.660  1.00  0.00      LIG  
ATOM   7147 O4   LIG     1      -7.712  38.446  14.048  1.00  0.00      LIG  
ATOM   7148 O5   LIG     1      -5.453  37.375  11.415  1.00  0.00      LIG  
ATOM   7149 H    LIG     1      -7.463  37.162  17.173  1.00  0.00      LIG  
ATOM   7150 H1   LIG     1      -6.017  36.614  18.079  1.00  0.00      LIG  
ATOM   7151 H2   LIG     1      -6.968  35.443  17.144  1.00  0.00      LIG  
ATOM   7152 H3   LIG     1      -6.920  35.430  14.916  1.00  0.00      LIG  
ATOM   7153 H4   LIG     1      -4.493  36.678  13.728  1.00  0.00      LIG  
ATOM   7154 H5   LIG     1      -4.593  34.790  12.224  1.00  0.00      LIG  
ATOM   7155 H6   LIG     1      -7.187  36.685  12.255  1.00  0.00      LIG  
ATOM   7156 H7   LIG     1      -5.760  38.946  13.722  1.00  0.00      LIG  
ATOM   7157 H8   LIG     1      -6.200  39.661  11.297  1.00  0.00      LIG  
ATOM   7158 H9   LIG     1      -9.147  39.571  12.124  1.00  0.00      LIG  
ATOM   7159 H10  LIG     1      -8.424  38.281  11.133  1.00  0.00      LIG  
ATOM   7160 H11  LIG     1      -8.270  41.035  10.541  1.00  0.00      LIG  
ATOM   7161 H12  LIG     1      -6.162  41.027  13.137  1.00  0.00      LIG  
ATOM   7162 H13  LIG     1      -7.466  37.752  14.684  1.00  0.00      LIG  
ATOM   7163 H14  LIG     1      -4.608  37.763  11.715  1.00  0.00      LIG  
TER
REMARK  Energy: 5.58296
REMARK  SimpleFitness: 5.58296
REMARK  FullFitness: -2508.6572
REMARK  InterFull: -38.1549
REMARK  IntraFull: 70.9727
REMARK  solvFull: -2897.72
REMARK  surfFull: 356.245
REMARK  extraFull: 0.0
REMARK  deltaGcompsolvpol: -2897.72
REMARK  deltaGcompsolvnonpol: 356.245
REMARK  deltaGprotsolvpol: -2902.69
REMARK  deltaGprotsolvnonpol: 355.646
REMARK  deltaGligsolvpol: -18.8423
REMARK  deltaGligsolvnonpol: 6.56655
REMARK  deltaGvdw: -38.1549
REMARK  deltaGelec: 0.0
REMARK  deltaG: -6.706673
REMARK  Cluster: 15
REMARK  ClusterRank: 1
ATOM   7134 C    LIG     1      -7.481  36.921  17.429  1.00  0.00      LIG  
ATOM   7135 C1   LIG     1      -6.327  36.930  16.472  1.00  0.00      LIG  
ATOM   7136 O    LIG     1      -5.233  37.375  16.777  1.00  0.00      LIG  
ATOM   7137 N    LIG     1      -6.634  36.395  15.242  1.00  0.00      LIG  
ATOM   7138 C2   LIG     1      -5.626  36.215  14.207  1.00  0.00      LIG  
ATOM   7139 C3   LIG     1      -5.489  34.713  14.180  1.00  0.00      LIG  
ATOM   7140 O1   LIG     1      -6.327  33.989  13.661  1.00  0.00      LIG  
ATOM   7141 C4   LIG     1      -6.048  36.730  12.816  1.00  0.00      LIG  
ATOM   7142 C5   LIG     1      -6.249  38.258  12.755  1.00  0.00      LIG  
ATOM   7143 C6   LIG     1      -6.580  38.755  11.333  1.00  0.00      LIG  
ATOM   7144 C7   LIG     1      -7.105  40.190  11.311  1.00  0.00      LIG  
ATOM   7145 O2   LIG     1      -8.475  40.244  11.687  1.00  0.00      LIG  
ATOM   7146 O3   LIG     1      -5.418  38.725  10.505  1.00  0.00      LIG  
ATOM   7147 O4   LIG     1      -7.298  38.637  13.641  1.00  0.00      LIG  
ATOM   7148 O5   LIG     1      -5.034  36.351  11.885  1.00  0.00      LIG  
ATOM   7149 H    LIG     1      -7.598  37.924  17.847  1.00  0.00      LIG  
ATOM   7150 H1   LIG     1      -7.268  36.209  18.230  1.00  0.00      LIG  
ATOM   7151 H2   LIG     1      -8.414  36.635  16.933  1.00  0.00      LIG  
ATOM   7152 H3   LIG     1      -7.547  35.970  15.112  1.00  0.00      LIG  
ATOM   7153 H4   LIG     1      -4.660  36.636  14.503  1.00  0.00      LIG  
ATOM   7154 H5   LIG     1      -4.740  34.297  14.870  1.00  0.00      LIG  
ATOM   7155 H6   LIG     1      -6.979  36.240  12.511  1.00  0.00      LIG  
ATOM   7156 H7   LIG     1      -5.330  38.746  13.093  1.00  0.00      LIG  
ATOM   7157 H8   LIG     1      -7.332  38.094  10.891  1.00  0.00      LIG  
ATOM   7158 H9   LIG     1      -7.016  40.624  10.311  1.00  0.00      LIG  
ATOM   7159 H10  LIG     1      -6.527  40.822  11.991  1.00  0.00      LIG  
ATOM   7160 H11  LIG     1      -8.532  39.775  12.539  1.00  0.00      LIG  
ATOM   7161 H12  LIG     1      -4.688  39.098  11.029  1.00  0.00      LIG  
ATOM   7162 H13  LIG     1      -7.119  38.190  14.487  1.00  0.00      LIG  
ATOM   7163 H14  LIG     1      -4.283  36.963  12.008  1.00  0.00      LIG  
TER
REMARK  Energy: 5.61536
REMARK  SimpleFitness: 5.61536
REMARK  FullFitness: -2508.6057
REMARK  InterFull: -31.2213
REMARK  IntraFull: 66.0826
REMARK  solvFull: -2900.24
REMARK  surfFull: 356.773
REMARK  extraFull: 0.0
REMARK  deltaGcompsolvpol: -2900.24
REMARK  deltaGcompsolvnonpol: 356.773
REMARK  deltaGprotsolvpol: -2902.69
REMARK  deltaGprotsolvnonpol: 355.646
REMARK  deltaGligsolvpol: -17.1857
REMARK  deltaGligsolvnonpol: 7.01363
REMARK  deltaGvdw: -31.2213
REMARK  deltaGelec: 0.0
REMARK  deltaG: -6.298707
REMARK  Cluster: 15
REMARK  ClusterRank: 2
ATOM   7134 C    LIG     1      -6.891  36.444  17.298  1.00  0.00      LIG  
ATOM   7135 C1   LIG     1      -6.039  36.949  16.177  1.00  0.00      LIG  
ATOM   7136 O    LIG     1      -5.379  37.970  16.279  1.00  0.00      LIG  
ATOM   7137 N    LIG     1      -6.082  36.153  15.056  1.00  0.00      LIG  
ATOM   7138 C2   LIG     1      -5.380  36.513  13.836  1.00  0.00      LIG  
ATOM   7139 C3   LIG     1      -4.379  35.396  13.680  1.00  0.00      LIG  
ATOM   7140 O1   LIG     1      -4.674  34.301  13.220  1.00  0.00      LIG  
ATOM   7141 C4   LIG     1      -6.280  36.592  12.582  1.00  0.00      LIG  
ATOM   7142 C5   LIG     1      -7.601  37.368  12.744  1.00  0.00      LIG  
ATOM   7143 C6   LIG     1      -8.742  36.520  13.318  1.00  0.00      LIG  
ATOM   7144 C7   LIG     1     -10.031  37.318  13.484  1.00  0.00      LIG  
ATOM   7145 O2   LIG     1     -10.365  38.012  12.285  1.00  0.00      LIG  
ATOM   7146 O3   LIG     1      -8.982  35.405  12.462  1.00  0.00      LIG  
ATOM   7147 O4   LIG     1      -7.410  38.528  13.552  1.00  0.00      LIG  
ATOM   7148 O5   LIG     1      -5.542  37.274  11.563  1.00  0.00      LIG  
ATOM   7149 H    LIG     1      -6.269  35.874  17.992  1.00  0.00      LIG  
ATOM   7150 H1   LIG     1      -7.700  35.812  16.920  1.00  0.00      LIG  
ATOM   7151 H2   LIG     1      -7.331  37.299  17.816  1.00  0.00      LIG  
ATOM   7152 H3   LIG     1      -6.598  35.280  15.093  1.00  0.00      LIG  
ATOM   7153 H4   LIG     1      -4.815  37.442  13.967  1.00  0.00      LIG  
ATOM   7154 H5   LIG     1      -3.458  35.511  14.270  1.00  0.00      LIG  
ATOM   7155 H6   LIG     1      -6.499  35.597  12.185  1.00  0.00      LIG  
ATOM   7156 H7   LIG     1      -7.909  37.725  11.756  1.00  0.00      LIG  
ATOM   7157 H8   LIG     1      -8.478  36.123  14.299  1.00  0.00      LIG  
ATOM   7158 H9   LIG     1      -9.932  38.057  14.283  1.00  0.00      LIG  
ATOM   7159 H10  LIG     1     -10.866  36.654  13.724  1.00  0.00      LIG  
ATOM   7160 H11  LIG     1      -9.649  38.652  12.130  1.00  0.00      LIG  
ATOM   7161 H12  LIG     1      -9.476  35.749  11.697  1.00  0.00      LIG  
ATOM   7162 H13  LIG     1      -6.623  38.985  13.204  1.00  0.00      LIG  
ATOM   7163 H14  LIG     1      -4.600  37.261  11.816  1.00  0.00      LIG  
TER
REMARK  Energy: 4.13433
REMARK  SimpleFitness: 4.13433
REMARK  FullFitness: -2507.6296
REMARK  InterFull: -28.6895
REMARK  IntraFull: 64.996
REMARK  solvFull: -2900.53
REMARK  surfFull: 356.594
REMARK  extraFull: 0.0
REMARK  deltaGcompsolvpol: -2900.53
REMARK  deltaGcompsolvnonpol: 356.594
REMARK  deltaGprotsolvpol: -2902.69
REMARK  deltaGprotsolvnonpol: 355.646
REMARK  deltaGligsolvpol: -17.3965
REMARK  deltaGligsolvnonpol: 6.6169
REMARK  deltaGvdw: -28.6895
REMARK  deltaGelec: 0.0
REMARK  deltaG: -6.0434523
REMARK  Cluster: 15
REMARK  ClusterRank: 3
ATOM   7134 C    LIG     1      -6.397  36.614  17.470  1.00  0.00      LIG  
ATOM   7135 C1   LIG     1      -5.992  37.218  16.162  1.00  0.00      LIG  
ATOM   7136 O    LIG     1      -5.912  38.426  16.002  1.00  0.00      LIG  
ATOM   7137 N    LIG     1      -5.693  36.280  15.205  1.00  0.00      LIG  
ATOM   7138 C2   LIG     1      -5.432  36.664  13.829  1.00  0.00      LIG  
ATOM   7139 C3   LIG     1      -4.634  35.539  13.210  1.00  0.00      LIG  
ATOM   7140 O1   LIG     1      -4.685  34.376  13.583  1.00  0.00      LIG  
ATOM   7141 C4   LIG     1      -6.729  36.976  13.057  1.00  0.00      LIG  
ATOM   7142 C5   LIG     1      -6.433  37.562  11.669  1.00  0.00      LIG  
ATOM   7143 C6   LIG     1      -7.667  37.902  10.822  1.00  0.00      LIG  
ATOM   7144 C7   LIG     1      -8.198  36.687  10.068  1.00  0.00      LIG  
ATOM   7145 O2   LIG     1      -9.065  37.109   9.023  1.00  0.00      LIG  
ATOM   7146 O3   LIG     1      -8.701  38.434  11.649  1.00  0.00      LIG  
ATOM   7147 O4   LIG     1      -5.696  38.767  11.844  1.00  0.00      LIG  
ATOM   7148 O5   LIG     1      -7.561  35.815  12.954  1.00  0.00      LIG  
ATOM   7149 H    LIG     1      -7.272  37.147  17.851  1.00  0.00      LIG  
ATOM   7150 H1   LIG     1      -5.566  36.709  18.174  1.00  0.00      LIG  
ATOM   7151 H2   LIG     1      -6.653  35.556  17.360  1.00  0.00      LIG  
ATOM   7152 H3   LIG     1      -5.788  35.294  15.428  1.00  0.00      LIG  
ATOM   7153 H4   LIG     1      -4.789  37.548  13.856  1.00  0.00      LIG  
ATOM   7154 H5   LIG     1      -4.099  35.799  12.283  1.00  0.00      LIG  
ATOM   7155 H6   LIG     1      -7.287  37.712  13.642  1.00  0.00      LIG  
ATOM   7156 H7   LIG     1      -5.804  36.881  11.093  1.00  0.00      LIG  
ATOM   7157 H8   LIG     1      -7.421  38.688  10.099  1.00  0.00      LIG  
ATOM   7158 H9   LIG     1      -8.773  36.025  10.721  1.00  0.00      LIG  
ATOM   7159 H10  LIG     1      -7.380  36.122   9.615  1.00  0.00      LIG  
ATOM   7160 H11  LIG     1      -9.693  37.732   9.429  1.00  0.00      LIG  
ATOM   7161 H12  LIG     1      -8.306  39.180  12.135  1.00  0.00      LIG  
ATOM   7162 H13  LIG     1      -4.824  38.532  12.209  1.00  0.00      LIG  
ATOM   7163 H14  LIG     1      -8.403  36.115  12.568  1.00  0.00      LIG  
TER
REMARK  Energy: 6.8194
REMARK  SimpleFitness: 6.8194
REMARK  FullFitness: -2505.0813
REMARK  InterFull: -27.603
REMARK  IntraFull: 64.2148
REMARK  solvFull: -2898.31
REMARK  surfFull: 356.617
REMARK  extraFull: 0.0
REMARK  deltaGcompsolvpol: -2898.31
REMARK  deltaGcompsolvnonpol: 356.617
REMARK  deltaGprotsolvpol: -2902.69
REMARK  deltaGprotsolvnonpol: 355.646
REMARK  deltaGligsolvpol: -16.9629
REMARK  deltaGligsolvnonpol: 6.59961
REMARK  deltaGvdw: -27.603
REMARK  deltaGelec: 0.0
REMARK  deltaG: -5.8275313
REMARK  Cluster: 15
REMARK  ClusterRank: 4
ATOM   7134 C    LIG     1      -6.349  36.606  17.209  1.00  0.00      LIG  
ATOM   7135 C1   LIG     1      -5.850  36.959  15.840  1.00  0.00      LIG  
ATOM   7136 O    LIG     1      -5.302  38.026  15.609  1.00  0.00      LIG  
ATOM   7137 N    LIG     1      -6.166  36.020  14.888  1.00  0.00      LIG  
ATOM   7138 C2   LIG     1      -5.981  36.285  13.468  1.00  0.00      LIG  
ATOM   7139 C3   LIG     1      -5.938  34.946  12.768  1.00  0.00      LIG  
ATOM   7140 O1   LIG     1      -6.401  33.909  13.224  1.00  0.00      LIG  
ATOM   7141 C4   LIG     1      -7.071  37.220  12.897  1.00  0.00      LIG  
ATOM   7142 C5   LIG     1      -6.875  37.525  11.403  1.00  0.00      LIG  
ATOM   7143 C6   LIG     1      -7.786  38.624  10.837  1.00  0.00      LIG  
ATOM   7144 C7   LIG     1      -9.158  38.083  10.453  1.00  0.00      LIG  
ATOM   7145 O2   LIG     1      -9.834  39.022   9.625  1.00  0.00      LIG  
ATOM   7146 O3   LIG     1      -7.950  39.679  11.786  1.00  0.00      LIG  
ATOM   7147 O4   LIG     1      -5.526  37.924  11.183  1.00  0.00      LIG  
ATOM   7148 O5   LIG     1      -8.378  36.676  13.110  1.00  0.00      LIG  
ATOM   7149 H    LIG     1      -7.225  37.219  17.438  1.00  0.00      LIG  
ATOM   7150 H1   LIG     1      -5.555  36.807  17.933  1.00  0.00      LIG  
ATOM   7151 H2   LIG     1      -6.623  35.549  17.275  1.00  0.00      LIG  
ATOM   7152 H3   LIG     1      -6.681  35.190  15.164  1.00  0.00      LIG  
ATOM   7153 H4   LIG     1      -4.996  36.745  13.350  1.00  0.00      LIG  
ATOM   7154 H5   LIG     1      -5.529  34.967  11.746  1.00  0.00      LIG  
ATOM   7155 H6   LIG     1      -7.017  38.149  13.471  1.00  0.00      LIG  
ATOM   7156 H7   LIG     1      -7.036  36.620  10.811  1.00  0.00      LIG  
ATOM   7157 H8   LIG     1      -7.324  39.079   9.954  1.00  0.00      LIG  
ATOM   7158 H9   LIG     1      -9.784  37.913  11.332  1.00  0.00      LIG  
ATOM   7159 H10  LIG     1      -9.063  37.148   9.893  1.00  0.00      LIG  
ATOM   7160 H11  LIG     1      -9.766  39.880  10.078  1.00  0.00      LIG  
ATOM   7161 H12  LIG     1      -7.063  40.029  11.981  1.00  0.00      LIG  
ATOM   7162 H13  LIG     1      -5.278  38.543  11.892  1.00  0.00      LIG  
ATOM   7163 H14  LIG     1      -9.012  37.376  12.879  1.00  0.00      LIG  
TER
REMARK  Energy: 26.6489
REMARK  SimpleFitness: 26.6489
REMARK  FullFitness: -2485.1226
REMARK  InterFull: -25.1093
REMARK  IntraFull: 86.1196
REMARK  solvFull: -2902.68
REMARK  surfFull: 356.547
REMARK  extraFull: 0.0
REMARK  deltaGcompsolvpol: -2902.68
REMARK  deltaGcompsolvnonpol: 356.547
REMARK  deltaGprotsolvpol: -2902.69
REMARK  deltaGprotsolvnonpol: 355.646
REMARK  deltaGligsolvpol: -20.051
REMARK  deltaGligsolvnonpol: 6.96566
REMARK  deltaGvdw: -25.1093
REMARK  deltaGelec: 0.0
REMARK  deltaG: -5.711323
REMARK  Cluster: 15
REMARK  ClusterRank: 5
ATOM   7134 C    LIG     1      -6.701  35.806  15.372  1.00  0.00      LIG  
ATOM   7135 C1   LIG     1      -5.502  36.654  15.052  1.00  0.00      LIG  
ATOM   7136 O    LIG     1      -4.949  37.278  15.944  1.00  0.00      LIG  
ATOM   7137 N    LIG     1      -4.927  36.555  13.794  1.00  0.00      LIG  
ATOM   7138 C2   LIG     1      -5.466  36.179  12.481  1.00  0.00      LIG  
ATOM   7139 C3   LIG     1      -5.893  34.743  12.330  1.00  0.00      LIG  
ATOM   7140 O1   LIG     1      -5.522  33.846  13.068  1.00  0.00      LIG  
ATOM   7141 C4   LIG     1      -6.412  37.185  11.791  1.00  0.00      LIG  
ATOM   7142 C5   LIG     1      -7.783  37.428  12.453  1.00  0.00      LIG  
ATOM   7143 C6   LIG     1      -8.670  38.477  11.752  1.00  0.00      LIG  
ATOM   7144 C7   LIG     1      -8.745  39.796  12.519  1.00  0.00      LIG  
ATOM   7145 O2   LIG     1      -7.471  40.236  12.973  1.00  0.00      LIG  
ATOM   7146 O3   LIG     1      -8.240  38.724  10.413  1.00  0.00      LIG  
ATOM   7147 O4   LIG     1      -8.513  36.201  12.451  1.00  0.00      LIG  
ATOM   7148 O5   LIG     1      -5.709  38.418  11.609  1.00  0.00      LIG  
ATOM   7149 H    LIG     1      -7.388  36.392  15.988  1.00  0.00      LIG  
ATOM   7150 H1   LIG     1      -6.370  34.925  15.929  1.00  0.00      LIG  
ATOM   7151 H2   LIG     1      -7.230  35.475  14.482  1.00  0.00      LIG  
ATOM   7152 H3   LIG     1      -4.067  37.093  13.725  1.00  0.00      LIG  
ATOM   7153 H4   LIG     1      -4.563  36.198  11.866  1.00  0.00      LIG  
ATOM   7154 H5   LIG     1      -6.363  34.499  11.364  1.00  0.00      LIG  
ATOM   7155 H6   LIG     1      -6.602  36.789  10.789  1.00  0.00      LIG  
ATOM   7156 H7   LIG     1      -7.663  37.721  13.499  1.00  0.00      LIG  
ATOM   7157 H8   LIG     1      -9.698  38.113  11.661  1.00  0.00      LIG  
ATOM   7158 H9   LIG     1      -9.375  39.672  13.403  1.00  0.00      LIG  
ATOM   7159 H10  LIG     1      -9.167  40.588  11.893  1.00  0.00      LIG  
ATOM   7160 H11  LIG     1      -6.809  39.932  12.326  1.00  0.00      LIG  
ATOM   7161 H12  LIG     1      -7.286  38.918  10.462  1.00  0.00      LIG  
ATOM   7162 H13  LIG     1      -8.098  35.621  13.111  1.00  0.00      LIG  
ATOM   7163 H14  LIG     1      -4.760  38.233  11.736  1.00  0.00      LIG  
TER
REMARK  Energy: 27.2389
REMARK  SimpleFitness: 27.2389
REMARK  FullFitness: -2484.3425
REMARK  InterFull: -27.256
REMARK  IntraFull: 86.7095
REMARK  solvFull: -2900.35
REMARK  surfFull: 356.554
REMARK  extraFull: 0.0
REMARK  deltaGcompsolvpol: -2900.35
REMARK  deltaGcompsolvnonpol: 356.554
REMARK  deltaGprotsolvpol: -2902.69
REMARK  deltaGprotsolvnonpol: 355.646
REMARK  deltaGligsolvpol: -19.7049
REMARK  deltaGligsolvnonpol: 6.97924
REMARK  deltaGvdw: -27.256
REMARK  deltaGelec: 0.0
REMARK  deltaG: -5.7936196
REMARK  Cluster: 15
REMARK  ClusterRank: 6
ATOM   7134 C    LIG     1      -6.744  35.765  15.434  1.00  0.00      LIG  
ATOM   7135 C1   LIG     1      -5.509  36.571  15.150  1.00  0.00      LIG  
ATOM   7136 O    LIG     1      -4.965  37.183  16.057  1.00  0.00      LIG  
ATOM   7137 N    LIG     1      -4.893  36.452  13.913  1.00  0.00      LIG  
ATOM   7138 C2   LIG     1      -5.391  36.106  12.576  1.00  0.00      LIG  
ATOM   7139 C3   LIG     1      -5.714  34.655  12.319  1.00  0.00      LIG  
ATOM   7140 O1   LIG     1      -5.970  33.824  13.177  1.00  0.00      LIG  
ATOM   7141 C4   LIG     1      -6.345  37.105  11.883  1.00  0.00      LIG  
ATOM   7142 C5   LIG     1      -7.770  37.224  12.458  1.00  0.00      LIG  
ATOM   7143 C6   LIG     1      -8.671  38.267  11.764  1.00  0.00      LIG  
ATOM   7144 C7   LIG     1      -8.879  39.526  12.604  1.00  0.00      LIG  
ATOM   7145 O2   LIG     1      -7.675  39.989  13.205  1.00  0.00      LIG  
ATOM   7146 O3   LIG     1      -8.169  38.626  10.476  1.00  0.00      LIG  
ATOM   7147 O4   LIG     1      -8.421  35.960  12.336  1.00  0.00      LIG  
ATOM   7148 O5   LIG     1      -5.713  38.386  11.825  1.00  0.00      LIG  
ATOM   7149 H    LIG     1      -7.436  36.377  16.018  1.00  0.00      LIG  
ATOM   7150 H1   LIG     1      -6.460  34.880  16.009  1.00  0.00      LIG  
ATOM   7151 H2   LIG     1      -7.252  35.443  14.528  1.00  0.00      LIG  
ATOM   7152 H3   LIG     1      -4.017  36.963  13.878  1.00  0.00      LIG  
ATOM   7153 H4   LIG     1      -4.461  36.200  12.007  1.00  0.00      LIG  
ATOM   7154 H5   LIG     1      -5.756  34.376  11.255  1.00  0.00      LIG  
ATOM   7155 H6   LIG     1      -6.446  36.765  10.847  1.00  0.00      LIG  
ATOM   7156 H7   LIG     1      -7.738  37.458  13.523  1.00  0.00      LIG  
ATOM   7157 H8   LIG     1      -9.666  37.850  11.579  1.00  0.00      LIG  
ATOM   7158 H9   LIG     1      -9.583  39.317  13.413  1.00  0.00      LIG  
ATOM   7159 H10  LIG     1      -9.282  40.339  11.993  1.00  0.00      LIG  
ATOM   7160 H11  LIG     1      -6.954  39.838  12.568  1.00  0.00      LIG  
ATOM   7161 H12  LIG     1      -7.238  38.881  10.604  1.00  0.00      LIG  
ATOM   7162 H13  LIG     1      -7.944  35.333  12.906  1.00  0.00      LIG  
ATOM   7163 H14  LIG     1      -4.749  38.236  11.864  1.00  0.00      LIG  
TER
REMARK  Energy: 4.01064
REMARK  SimpleFitness: 4.01064
REMARK  FullFitness: -2512.5696
REMARK  InterFull: -26.387
REMARK  IntraFull: 65.4115
REMARK  solvFull: -2906.74
REMARK  surfFull: 355.146
REMARK  extraFull: 0.0
REMARK  deltaGcompsolvpol: -2906.74
REMARK  deltaGcompsolvnonpol: 355.146
REMARK  deltaGprotsolvpol: -2902.69
REMARK  deltaGprotsolvnonpol: 355.646
REMARK  deltaGligsolvpol: -19.0626
REMARK  deltaGligsolvnonpol: 6.43829
REMARK  deltaGvdw: -26.387
REMARK  deltaGelec: 0.0
REMARK  deltaG: -6.2238045
REMARK  Cluster: 16
REMARK  ClusterRank: 0
ATOM   7134 C    LIG     1       9.726   3.450  41.780  1.00  0.00      LIG  
ATOM   7135 C1   LIG     1      10.078   2.386  40.783  1.00  0.00      LIG  
ATOM   7136 O    LIG     1       9.527   2.302  39.697  1.00  0.00      LIG  
ATOM   7137 N    LIG     1      11.032   1.502  41.236  1.00  0.00      LIG  
ATOM   7138 C2   LIG     1      11.501   0.398  40.409  1.00  0.00      LIG  
ATOM   7139 C3   LIG     1      12.796   0.830  39.750  1.00  0.00      LIG  
ATOM   7140 O1   LIG     1      13.072   1.989  39.472  1.00  0.00      LIG  
ATOM   7141 C4   LIG     1      11.653  -0.898  41.232  1.00  0.00      LIG  
ATOM   7142 C5   LIG     1      11.579  -2.133  40.326  1.00  0.00      LIG  
ATOM   7143 C6   LIG     1      11.788  -3.433  41.109  1.00  0.00      LIG  
ATOM   7144 C7   LIG     1      11.267  -4.704  40.445  1.00  0.00      LIG  
ATOM   7145 O2   LIG     1      11.780  -4.882  39.136  1.00  0.00      LIG  
ATOM   7146 O3   LIG     1      13.151  -3.609  41.490  1.00  0.00      LIG  
ATOM   7147 O4   LIG     1      10.281  -2.130  39.749  1.00  0.00      LIG  
ATOM   7148 O5   LIG     1      12.841  -0.889  42.032  1.00  0.00      LIG  
ATOM   7149 H    LIG     1      10.449   3.485  42.602  1.00  0.00      LIG  
ATOM   7150 H1   LIG     1       8.732   3.243  42.185  1.00  0.00      LIG  
ATOM   7151 H2   LIG     1       9.724   4.418  41.273  1.00  0.00      LIG  
ATOM   7152 H3   LIG     1      11.508   1.699  42.111  1.00  0.00      LIG  
ATOM   7153 H4   LIG     1      10.784   0.237  39.600  1.00  0.00      LIG  
ATOM   7154 H5   LIG     1      13.379   0.012  39.301  1.00  0.00      LIG  
ATOM   7155 H6   LIG     1      10.813  -0.955  41.932  1.00  0.00      LIG  
ATOM   7156 H7   LIG     1      12.316  -2.043  39.528  1.00  0.00      LIG  
ATOM   7157 H8   LIG     1      11.233  -3.332  42.026  1.00  0.00      LIG  
ATOM   7158 H9   LIG     1      10.179  -4.681  40.374  1.00  0.00      LIG  
ATOM   7159 H10  LIG     1      11.549  -5.584  41.027  1.00  0.00      LIG  
ATOM   7160 H11  LIG     1      12.732  -5.052  39.229  1.00  0.00      LIG  
ATOM   7161 H12  LIG     1      13.664  -3.738  40.675  1.00  0.00      LIG  
ATOM   7162 H13  LIG     1      10.258  -2.841  39.079  1.00  0.00      LIG  
ATOM   7163 H14  LIG     1      13.030  -1.817  42.263  1.00  0.00      LIG  
TER
REMARK  Energy: 9.992
REMARK  SimpleFitness: 9.992
REMARK  FullFitness: -2508.0022
REMARK  InterFull: -26.3988
REMARK  IntraFull: 66.9515
REMARK  solvFull: -2904.13
REMARK  surfFull: 355.575
REMARK  extraFull: 0.0
REMARK  deltaGcompsolvpol: -2904.13
REMARK  deltaGcompsolvnonpol: 355.575
REMARK  deltaGprotsolvpol: -2902.69
REMARK  deltaGprotsolvnonpol: 355.646
REMARK  deltaGligsolvpol: -16.7964
REMARK  deltaGligsolvnonpol: 6.53438
REMARK  deltaGvdw: -26.3988
REMARK  deltaGelec: 0.0
REMARK  deltaG: -6.172379
REMARK  Cluster: 16
REMARK  ClusterRank: 1
ATOM   7134 C    LIG     1      10.117   2.016  40.103  1.00  0.00      LIG  
ATOM   7135 C1   LIG     1      11.487   1.414  40.117  1.00  0.00      LIG  
ATOM   7136 O    LIG     1      12.357   1.752  39.330  1.00  0.00      LIG  
ATOM   7137 N    LIG     1      11.632   0.428  41.065  1.00  0.00      LIG  
ATOM   7138 C2   LIG     1      12.907  -0.238  41.288  1.00  0.00      LIG  
ATOM   7139 C3   LIG     1      13.549   0.550  42.414  1.00  0.00      LIG  
ATOM   7140 O1   LIG     1      12.925   1.084  43.321  1.00  0.00      LIG  
ATOM   7141 C4   LIG     1      12.816  -1.724  41.696  1.00  0.00      LIG  
ATOM   7142 C5   LIG     1      11.978  -2.619  40.753  1.00  0.00      LIG  
ATOM   7143 C6   LIG     1      11.979  -4.105  41.162  1.00  0.00      LIG  
ATOM   7144 C7   LIG     1      11.086  -4.961  40.283  1.00  0.00      LIG  
ATOM   7145 O2   LIG     1      11.540  -5.015  38.937  1.00  0.00      LIG  
ATOM   7146 O3   LIG     1      13.272  -4.705  41.229  1.00  0.00      LIG  
ATOM   7147 O4   LIG     1      10.617  -2.192  40.736  1.00  0.00      LIG  
ATOM   7148 O5   LIG     1      14.158  -2.213  41.744  1.00  0.00      LIG  
ATOM   7149 H    LIG     1      10.198   3.068  39.818  1.00  0.00      LIG  
ATOM   7150 H1   LIG     1       9.650   1.956  41.091  1.00  0.00      LIG  
ATOM   7151 H2   LIG     1       9.502   1.483  39.374  1.00  0.00      LIG  
ATOM   7152 H3   LIG     1      10.881   0.280  41.731  1.00  0.00      LIG  
ATOM   7153 H4   LIG     1      13.547  -0.117  40.407  1.00  0.00      LIG  
ATOM   7154 H5   LIG     1      14.643   0.442  42.485  1.00  0.00      LIG  
ATOM   7155 H6   LIG     1      12.405  -1.794  42.706  1.00  0.00      LIG  
ATOM   7156 H7   LIG     1      12.361  -2.514  39.739  1.00  0.00      LIG  
ATOM   7157 H8   LIG     1      11.566  -4.175  42.159  1.00  0.00      LIG  
ATOM   7158 H9   LIG     1      10.065  -4.595  40.284  1.00  0.00      LIG  
ATOM   7159 H10  LIG     1      11.060  -5.979  40.662  1.00  0.00      LIG  
ATOM   7160 H11  LIG     1      11.018  -4.360  38.438  1.00  0.00      LIG  
ATOM   7161 H12  LIG     1      13.128  -5.655  41.385  1.00  0.00      LIG  
ATOM   7162 H13  LIG     1      10.184  -2.666  40.005  1.00  0.00      LIG  
ATOM   7163 H14  LIG     1      14.097  -3.187  41.716  1.00  0.00      LIG  
TER
REMARK  Energy: 13.9759
REMARK  SimpleFitness: 13.9759
REMARK  FullFitness: -2504.0635
REMARK  InterFull: -21.9569
REMARK  IntraFull: 67.6466
REMARK  solvFull: -2905.55
REMARK  surfFull: 355.797
REMARK  extraFull: 0.0
REMARK  deltaGcompsolvpol: -2905.55
REMARK  deltaGcompsolvnonpol: 355.797
REMARK  deltaGprotsolvpol: -2902.69
REMARK  deltaGprotsolvnonpol: 355.646
REMARK  deltaGligsolvpol: -14.8913
REMARK  deltaGligsolvnonpol: 6.582
REMARK  deltaGvdw: -21.9569
REMARK  deltaGelec: 0.0
REMARK  deltaG: -5.939186
REMARK  Cluster: 16
REMARK  ClusterRank: 2
ATOM   7134 C    LIG     1      10.585   1.688  39.988  1.00  0.00      LIG  
ATOM   7135 C1   LIG     1      11.348   0.834  40.954  1.00  0.00      LIG  
ATOM   7136 O    LIG     1      10.922   0.592  42.072  1.00  0.00      LIG  
ATOM   7137 N    LIG     1      12.499   0.305  40.404  1.00  0.00      LIG  
ATOM   7138 C2   LIG     1      13.479  -0.511  41.121  1.00  0.00      LIG  
ATOM   7139 C3   LIG     1      14.247   0.407  42.056  1.00  0.00      LIG  
ATOM   7140 O1   LIG     1      14.429   1.598  41.837  1.00  0.00      LIG  
ATOM   7141 C4   LIG     1      12.950  -1.775  41.838  1.00  0.00      LIG  
ATOM   7142 C5   LIG     1      12.104  -2.666  40.899  1.00  0.00      LIG  
ATOM   7143 C6   LIG     1      12.068  -4.169  41.234  1.00  0.00      LIG  
ATOM   7144 C7   LIG     1      11.097  -4.935  40.352  1.00  0.00      LIG  
ATOM   7145 O2   LIG     1      11.501  -4.936  38.990  1.00  0.00      LIG  
ATOM   7146 O3   LIG     1      13.345  -4.815  41.185  1.00  0.00      LIG  
ATOM   7147 O4   LIG     1      10.761  -2.182  40.910  1.00  0.00      LIG  
ATOM   7148 O5   LIG     1      14.080  -2.493  42.334  1.00  0.00      LIG  
ATOM   7149 H    LIG     1      10.127   2.515  40.535  1.00  0.00      LIG  
ATOM   7150 H1   LIG     1       9.808   1.087  39.509  1.00  0.00      LIG  
ATOM   7151 H2   LIG     1      11.246   2.102  39.222  1.00  0.00      LIG  
ATOM   7152 H3   LIG     1      12.768   0.645  39.487  1.00  0.00      LIG  
ATOM   7153 H4   LIG     1      14.211  -0.833  40.376  1.00  0.00      LIG  
ATOM   7154 H5   LIG     1      14.881  -0.111  42.791  1.00  0.00      LIG  
ATOM   7155 H6   LIG     1      12.356  -1.480  42.707  1.00  0.00      LIG  
ATOM   7156 H7   LIG     1      12.471  -2.543  39.883  1.00  0.00      LIG  
ATOM   7157 H8   LIG     1      11.701  -4.286  42.242  1.00  0.00      LIG  
ATOM   7158 H9   LIG     1      10.095  -4.518  40.406  1.00  0.00      LIG  
ATOM   7159 H10  LIG     1      11.037  -5.970  40.679  1.00  0.00      LIG  
ATOM   7160 H11  LIG     1      10.938  -4.283  38.531  1.00  0.00      LIG  
ATOM   7161 H12  LIG     1      13.181  -5.770  41.277  1.00  0.00      LIG  
ATOM   7162 H13  LIG     1      10.816  -1.214  41.003  1.00  0.00      LIG  
ATOM   7163 H14  LIG     1      13.935  -3.433  42.116  1.00  0.00      LIG  
TER
REMARK  Energy: 14.1788
REMARK  SimpleFitness: 14.1788
REMARK  FullFitness: -2503.3264
REMARK  InterFull: -22.8755
REMARK  IntraFull: 71.2009
REMARK  solvFull: -2906.96
REMARK  surfFull: 355.308
REMARK  extraFull: 0.0
REMARK  deltaGcompsolvpol: -2906.96
REMARK  deltaGcompsolvnonpol: 355.308
REMARK  deltaGprotsolvpol: -2902.69
REMARK  deltaGprotsolvnonpol: 355.646
REMARK  deltaGligsolvpol: -16.6347
REMARK  deltaGligsolvnonpol: 6.54245
REMARK  deltaGvdw: -22.8755
REMARK  deltaGelec: 0.0
REMARK  deltaG: -6.0481925
REMARK  Cluster: 16
REMARK  ClusterRank: 3
ATOM   7134 C    LIG     1      11.853   2.644  39.796  1.00  0.00      LIG  
ATOM   7135 C1   LIG     1      10.722   1.671  39.960  1.00  0.00      LIG  
ATOM   7136 O    LIG     1       9.613   1.922  39.521  1.00  0.00      LIG  
ATOM   7137 N    LIG     1      10.999   0.515  40.667  1.00  0.00      LIG  
ATOM   7138 C2   LIG     1      12.298   0.082  41.169  1.00  0.00      LIG  
ATOM   7139 C3   LIG     1      12.522   0.832  42.472  1.00  0.00      LIG  
ATOM   7140 O1   LIG     1      11.626   1.163  43.236  1.00  0.00      LIG  
ATOM   7141 C4   LIG     1      12.422  -1.426  41.496  1.00  0.00      LIG  
ATOM   7142 C5   LIG     1      11.784  -2.450  40.527  1.00  0.00      LIG  
ATOM   7143 C6   LIG     1      11.876  -3.878  41.101  1.00  0.00      LIG  
ATOM   7144 C7   LIG     1      11.142  -4.926  40.284  1.00  0.00      LIG  
ATOM   7145 O2   LIG     1      11.708  -5.086  38.992  1.00  0.00      LIG  
ATOM   7146 O3   LIG     1      13.208  -4.330  41.343  1.00  0.00      LIG  
ATOM   7147 O4   LIG     1      10.399  -2.181  40.319  1.00  0.00      LIG  
ATOM   7148 O5   LIG     1      13.822  -1.695  41.590  1.00  0.00      LIG  
ATOM   7149 H    LIG     1      11.496   3.489  39.201  1.00  0.00      LIG  
ATOM   7150 H1   LIG     1      12.685   2.171  39.268  1.00  0.00      LIG  
ATOM   7151 H2   LIG     1      12.178   3.013  40.773  1.00  0.00      LIG  
ATOM   7152 H3   LIG     1      10.224  -0.131  40.789  1.00  0.00      LIG  
ATOM   7153 H4   LIG     1      13.078   0.396  40.470  1.00  0.00      LIG  
ATOM   7154 H5   LIG     1      13.573   0.885  42.797  1.00  0.00      LIG  
ATOM   7155 H6   LIG     1      11.995  -1.613  42.482  1.00  0.00      LIG  
ATOM   7156 H7   LIG     1      12.282  -2.393  39.561  1.00  0.00      LIG  
ATOM   7157 H8   LIG     1      11.388  -3.865  42.066  1.00  0.00      LIG  
ATOM   7158 H9   LIG     1      10.092  -4.673  40.168  1.00  0.00      LIG  
ATOM   7159 H10  LIG     1      11.194  -5.888  40.787  1.00  0.00      LIG  
ATOM   7160 H11  LIG     1      12.673  -5.111  39.118  1.00  0.00      LIG  
ATOM   7161 H12  LIG     1      13.133  -5.221  41.728  1.00  0.00      LIG  
ATOM   7162 H13  LIG     1      10.119  -2.740  39.571  1.00  0.00      LIG  
ATOM   7163 H14  LIG     1      13.912  -2.666  41.631  1.00  0.00      LIG  
TER
REMARK  Energy: 15.0867
REMARK  SimpleFitness: 15.0867
REMARK  FullFitness: -2502.9417
REMARK  InterFull: -19.7438
REMARK  IntraFull: 69.442
REMARK  solvFull: -2908.41
REMARK  surfFull: 355.77
REMARK  extraFull: 0.0
REMARK  deltaGcompsolvpol: -2908.41
REMARK  deltaGcompsolvnonpol: 355.77
REMARK  deltaGprotsolvpol: -2902.69
REMARK  deltaGprotsolvnonpol: 355.646
REMARK  deltaGligsolvpol: -18.8039
REMARK  deltaGligsolvnonpol: 6.74985
REMARK  deltaGvdw: -19.7438
REMARK  deltaGelec: 0.0
REMARK  deltaG: -5.683833
REMARK  Cluster: 16
REMARK  ClusterRank: 4
ATOM   7134 C    LIG     1      10.072   2.145  39.871  1.00  0.00      LIG  
ATOM   7135 C1   LIG     1      11.098   1.531  40.771  1.00  0.00      LIG  
ATOM   7136 O    LIG     1      11.209   1.863  41.944  1.00  0.00      LIG  
ATOM   7137 N    LIG     1      11.902   0.630  40.102  1.00  0.00      LIG  
ATOM   7138 C2   LIG     1      12.970  -0.149  40.725  1.00  0.00      LIG  
ATOM   7139 C3   LIG     1      14.201   0.724  40.901  1.00  0.00      LIG  
ATOM   7140 O1   LIG     1      14.474   1.666  40.162  1.00  0.00      LIG  
ATOM   7141 C4   LIG     1      12.492  -0.951  41.970  1.00  0.00      LIG  
ATOM   7142 C5   LIG     1      12.683  -2.462  41.772  1.00  0.00      LIG  
ATOM   7143 C6   LIG     1      11.794  -3.046  40.654  1.00  0.00      LIG  
ATOM   7144 C7   LIG     1      11.639  -4.565  40.769  1.00  0.00      LIG  
ATOM   7145 O2   LIG     1      12.881  -5.248  40.647  1.00  0.00      LIG  
ATOM   7146 O3   LIG     1      10.493  -2.466  40.701  1.00  0.00      LIG  
ATOM   7147 O4   LIG     1      14.060  -2.742  41.539  1.00  0.00      LIG  
ATOM   7148 O5   LIG     1      13.133  -0.554  43.194  1.00  0.00      LIG  
ATOM   7149 H    LIG     1       9.229   2.491  40.480  1.00  0.00      LIG  
ATOM   7150 H1   LIG     1       9.700   1.404  39.151  1.00  0.00      LIG  
ATOM   7151 H2   LIG     1      10.515   2.991  39.332  1.00  0.00      LIG  
ATOM   7152 H3   LIG     1      11.728   0.488  39.112  1.00  0.00      LIG  
ATOM   7153 H4   LIG     1      13.257  -0.862  39.949  1.00  0.00      LIG  
ATOM   7154 H5   LIG     1      14.992   0.296  41.535  1.00  0.00      LIG  
ATOM   7155 H6   LIG     1      11.425  -0.776  42.140  1.00  0.00      LIG  
ATOM   7156 H7   LIG     1      12.464  -2.974  42.705  1.00  0.00      LIG  
ATOM   7157 H8   LIG     1      12.219  -2.812  39.676  1.00  0.00      LIG  
ATOM   7158 H9   LIG     1      10.965  -4.946  39.993  1.00  0.00      LIG  
ATOM   7159 H10  LIG     1      11.201  -4.837  41.732  1.00  0.00      LIG  
ATOM   7160 H11  LIG     1      13.516  -4.790  41.227  1.00  0.00      LIG  
ATOM   7161 H12  LIG     1      10.020  -2.788  39.913  1.00  0.00      LIG  
ATOM   7162 H13  LIG     1      14.551  -2.329  42.272  1.00  0.00      LIG  
ATOM   7163 H14  LIG     1      12.665  -1.005  43.920  1.00  0.00      LIG  
TER
REMARK  Energy: 16.612
REMARK  SimpleFitness: 16.612
REMARK  FullFitness: -2502.2017
REMARK  InterFull: -16.7879
REMARK  IntraFull: 67.7445
REMARK  solvFull: -2909.34
REMARK  surfFull: 356.182
REMARK  extraFull: 0.0
REMARK  deltaGcompsolvpol: -2909.34
REMARK  deltaGcompsolvnonpol: 356.182
REMARK  deltaGprotsolvpol: -2902.69
REMARK  deltaGprotsolvnonpol: 355.646
REMARK  deltaGligsolvpol: -17.8722
REMARK  deltaGligsolvnonpol: 6.84315
REMARK  deltaGvdw: -16.7879
REMARK  deltaGelec: 0.0
REMARK  deltaG: -5.488001
REMARK  Cluster: 16
REMARK  ClusterRank: 5
ATOM   7134 C    LIG     1      11.159   1.260  39.807  1.00  0.00      LIG  
ATOM   7135 C1   LIG     1      12.012   0.830  40.959  1.00  0.00      LIG  
ATOM   7136 O    LIG     1      11.718   1.114  42.110  1.00  0.00      LIG  
ATOM   7137 N    LIG     1      13.087   0.056  40.559  1.00  0.00      LIG  
ATOM   7138 C2   LIG     1      14.040  -0.579  41.471  1.00  0.00      LIG  
ATOM   7139 C3   LIG     1      14.944   0.520  42.008  1.00  0.00      LIG  
ATOM   7140 O1   LIG     1      15.192   1.553  41.400  1.00  0.00      LIG  
ATOM   7141 C4   LIG     1      13.377  -1.487  42.544  1.00  0.00      LIG  
ATOM   7142 C5   LIG     1      13.072  -2.907  42.032  1.00  0.00      LIG  
ATOM   7143 C6   LIG     1      12.005  -2.989  40.928  1.00  0.00      LIG  
ATOM   7144 C7   LIG     1      11.511  -4.420  40.729  1.00  0.00      LIG  
ATOM   7145 O2   LIG     1      12.504  -5.251  40.145  1.00  0.00      LIG  
ATOM   7146 O3   LIG     1      10.880  -2.184  41.262  1.00  0.00      LIG  
ATOM   7147 O4   LIG     1      14.277  -3.548  41.618  1.00  0.00      LIG  
ATOM   7148 O5   LIG     1      14.203  -1.637  43.708  1.00  0.00      LIG  
ATOM   7149 H    LIG     1      10.694   2.219  40.050  1.00  0.00      LIG  
ATOM   7150 H1   LIG     1      10.386   0.506  39.635  1.00  0.00      LIG  
ATOM   7151 H2   LIG     1      11.761   1.383  38.903  1.00  0.00      LIG  
ATOM   7152 H3   LIG     1      13.256  -0.034  39.564  1.00  0.00      LIG  
ATOM   7153 H4   LIG     1      14.694  -1.196  40.850  1.00  0.00      LIG  
ATOM   7154 H5   LIG     1      15.608   0.217  42.831  1.00  0.00      LIG  
ATOM   7155 H6   LIG     1      12.451  -1.039  42.906  1.00  0.00      LIG  
ATOM   7156 H7   LIG     1      12.730  -3.497  42.880  1.00  0.00      LIG  
ATOM   7157 H8   LIG     1      12.413  -2.612  39.990  1.00  0.00      LIG  
ATOM   7158 H9   LIG     1      10.626  -4.440  40.086  1.00  0.00      LIG  
ATOM   7159 H10  LIG     1      11.221  -4.856  41.687  1.00  0.00      LIG  
ATOM   7160 H11  LIG     1      13.330  -5.064  40.627  1.00  0.00      LIG  
ATOM   7161 H12  LIG     1      10.254  -2.271  40.522  1.00  0.00      LIG  
ATOM   7162 H13  LIG     1      14.934  -3.370  42.315  1.00  0.00      LIG  
ATOM   7163 H14  LIG     1      13.717  -2.210  44.325  1.00  0.00      LIG  
TER
REMARK  Energy: 16.6949
REMARK  SimpleFitness: 16.6949
REMARK  FullFitness: -2500.7786
REMARK  InterFull: -23.2181
REMARK  IntraFull: 71.2954
REMARK  solvFull: -2904.55
REMARK  surfFull: 355.694
REMARK  extraFull: 0.0
REMARK  deltaGcompsolvpol: -2904.55
REMARK  deltaGcompsolvnonpol: 355.694
REMARK  deltaGprotsolvpol: -2902.69
REMARK  deltaGprotsolvnonpol: 355.646
REMARK  deltaGligsolvpol: -14.5331
REMARK  deltaGligsolvnonpol: 6.70662
REMARK  deltaGvdw: -23.2181
REMARK  deltaGelec: 0.0
REMARK  deltaG: -6.04075
REMARK  Cluster: 16
REMARK  ClusterRank: 6
ATOM   7134 C    LIG     1      10.460   1.540  41.687  1.00  0.00      LIG  
ATOM   7135 C1   LIG     1      10.559   1.236  40.219  1.00  0.00      LIG  
ATOM   7136 O    LIG     1       9.722   1.669  39.445  1.00  0.00      LIG  
ATOM   7137 N    LIG     1      11.689   0.573  39.762  1.00  0.00      LIG  
ATOM   7138 C2   LIG     1      12.781  -0.056  40.508  1.00  0.00      LIG  
ATOM   7139 C3   LIG     1      13.575   1.046  41.192  1.00  0.00      LIG  
ATOM   7140 O1   LIG     1      14.382   0.843  42.088  1.00  0.00      LIG  
ATOM   7141 C4   LIG     1      12.415  -1.289  41.374  1.00  0.00      LIG  
ATOM   7142 C5   LIG     1      11.810  -2.420  40.507  1.00  0.00      LIG  
ATOM   7143 C6   LIG     1      11.882  -3.832  41.124  1.00  0.00      LIG  
ATOM   7144 C7   LIG     1      11.123  -4.887  40.337  1.00  0.00      LIG  
ATOM   7145 O2   LIG     1      11.663  -5.065  39.035  1.00  0.00      LIG  
ATOM   7146 O3   LIG     1      13.211  -4.312  41.321  1.00  0.00      LIG  
ATOM   7147 O4   LIG     1      10.444  -2.114  40.236  1.00  0.00      LIG  
ATOM   7148 O5   LIG     1      13.590  -1.760  42.034  1.00  0.00      LIG  
ATOM   7149 H    LIG     1       9.517   2.063  41.866  1.00  0.00      LIG  
ATOM   7150 H1   LIG     1      11.282   2.189  41.997  1.00  0.00      LIG  
ATOM   7151 H2   LIG     1      10.456   0.619  42.271  1.00  0.00      LIG  
ATOM   7152 H3   LIG     1      11.700   0.419  38.760  1.00  0.00      LIG  
ATOM   7153 H4   LIG     1      13.461  -0.404  39.727  1.00  0.00      LIG  
ATOM   7154 H5   LIG     1      13.634   1.993  40.631  1.00  0.00      LIG  
ATOM   7155 H6   LIG     1      11.706  -1.003  42.154  1.00  0.00      LIG  
ATOM   7156 H7   LIG     1      12.322  -2.422  39.548  1.00  0.00      LIG  
ATOM   7157 H8   LIG     1      11.420  -3.788  42.098  1.00  0.00      LIG  
ATOM   7158 H9   LIG     1      10.073  -4.627  40.240  1.00  0.00      LIG  
ATOM   7159 H10  LIG     1      11.179  -5.847  40.847  1.00  0.00      LIG  
ATOM   7160 H11  LIG     1      12.625  -5.144  39.157  1.00  0.00      LIG  
ATOM   7161 H12  LIG     1      13.695  -3.580  41.748  1.00  0.00      LIG  
ATOM   7162 H13  LIG     1      10.158  -2.722  39.529  1.00  0.00      LIG  
ATOM   7163 H14  LIG     1      14.045  -0.971  42.386  1.00  0.00      LIG  
TER
REMARK  Energy: 15.1173
REMARK  SimpleFitness: 15.1173
REMARK  FullFitness: -2499.2598
REMARK  InterFull: -20.0053
REMARK  IntraFull: 72.3787
REMARK  solvFull: -2907.3
REMARK  surfFull: 355.667
REMARK  extraFull: 0.0
REMARK  deltaGcompsolvpol: -2907.3
REMARK  deltaGcompsolvnonpol: 355.667
REMARK  deltaGprotsolvpol: -2902.69
REMARK  deltaGprotsolvnonpol: 355.646
REMARK  deltaGligsolvpol: -19.0278
REMARK  deltaGligsolvnonpol: 6.52173
REMARK  deltaGvdw: -20.0053
REMARK  deltaGelec: 0.0
REMARK  deltaG: -5.615108
REMARK  Cluster: 16
REMARK  ClusterRank: 7
ATOM   7134 C    LIG     1       9.870   2.133  40.218  1.00  0.00      LIG  
ATOM   7135 C1   LIG     1      10.768   1.142  40.887  1.00  0.00      LIG  
ATOM   7136 O    LIG     1      10.744   0.948  42.092  1.00  0.00      LIG  
ATOM   7137 N    LIG     1      11.717   0.656  40.010  1.00  0.00      LIG  
ATOM   7138 C2   LIG     1      12.925  -0.065  40.410  1.00  0.00      LIG  
ATOM   7139 C3   LIG     1      13.824   1.004  41.028  1.00  0.00      LIG  
ATOM   7140 O1   LIG     1      14.828   0.767  41.684  1.00  0.00      LIG  
ATOM   7141 C4   LIG     1      12.738  -1.356  41.251  1.00  0.00      LIG  
ATOM   7142 C5   LIG     1      11.902  -2.432  40.512  1.00  0.00      LIG  
ATOM   7143 C6   LIG     1      11.907  -3.844  41.140  1.00  0.00      LIG  
ATOM   7144 C7   LIG     1      11.113  -4.859  40.332  1.00  0.00      LIG  
ATOM   7145 O2   LIG     1      11.707  -5.111  39.064  1.00  0.00      LIG  
ATOM   7146 O3   LIG     1      13.197  -4.405  41.390  1.00  0.00      LIG  
ATOM   7147 O4   LIG     1      10.542  -2.012  40.441  1.00  0.00      LIG  
ATOM   7148 O5   LIG     1      14.035  -1.884  41.525  1.00  0.00      LIG  
ATOM   7149 H    LIG     1      10.446   3.015  39.923  1.00  0.00      LIG  
ATOM   7150 H1   LIG     1       9.085   2.430  40.918  1.00  0.00      LIG  
ATOM   7151 H2   LIG     1       9.409   1.679  39.337  1.00  0.00      LIG  
ATOM   7152 H3   LIG     1      11.665   0.977  39.049  1.00  0.00      LIG  
ATOM   7153 H4   LIG     1      13.413  -0.329  39.469  1.00  0.00      LIG  
ATOM   7154 H5   LIG     1      13.732   2.006  40.579  1.00  0.00      LIG  
ATOM   7155 H6   LIG     1      12.268  -1.113  42.208  1.00  0.00      LIG  
ATOM   7156 H7   LIG     1      12.257  -2.505  39.487  1.00  0.00      LIG  
ATOM   7157 H8   LIG     1      11.419  -3.768  42.099  1.00  0.00      LIG  
ATOM   7158 H9   LIG     1      10.096  -4.519  40.168  1.00  0.00      LIG  
ATOM   7159 H10  LIG     1      11.068  -5.810  40.863  1.00  0.00      LIG  
ATOM   7160 H11  LIG     1      12.666  -5.154  39.219  1.00  0.00      LIG  
ATOM   7161 H12  LIG     1      13.045  -5.276  41.798  1.00  0.00      LIG  
ATOM   7162 H13  LIG     1      10.556  -1.094  40.120  1.00  0.00      LIG  
ATOM   7163 H14  LIG     1      13.915  -2.831  41.728  1.00  0.00      LIG  
TER
REMARK  Energy: 5.75588
REMARK  SimpleFitness: 5.75588
REMARK  FullFitness: -2512.3499
REMARK  InterFull: -28.1226
REMARK  IntraFull: 65.256
REMARK  solvFull: -2905.12
REMARK  surfFull: 355.637
REMARK  extraFull: 0.0
REMARK  deltaGcompsolvpol: -2905.12
REMARK  deltaGcompsolvnonpol: 355.637
REMARK  deltaGprotsolvpol: -2902.69
REMARK  deltaGprotsolvnonpol: 355.646
REMARK  deltaGligsolvpol: -18.009
REMARK  deltaGligsolvnonpol: 6.89748
REMARK  deltaGvdw: -28.1226
REMARK  deltaGelec: 0.0
REMARK  deltaG: -6.350327
REMARK  Cluster: 17
REMARK  ClusterRank: 0
ATOM   7134 C    LIG     1      18.228  -4.259  22.952  1.00  0.00      LIG  
ATOM   7135 C1   LIG     1      19.372  -3.613  22.234  1.00  0.00      LIG  
ATOM   7136 O    LIG     1      19.519  -2.401  22.206  1.00  0.00      LIG  
ATOM   7137 N    LIG     1      20.161  -4.525  21.571  1.00  0.00      LIG  
ATOM   7138 C2   LIG     1      21.291  -4.121  20.746  1.00  0.00      LIG  
ATOM   7139 C3   LIG     1      22.256  -5.277  20.745  1.00  0.00      LIG  
ATOM   7140 O1   LIG     1      21.917  -6.445  20.881  1.00  0.00      LIG  
ATOM   7141 C4   LIG     1      20.919  -3.712  19.307  1.00  0.00      LIG  
ATOM   7142 C5   LIG     1      19.769  -4.540  18.697  1.00  0.00      LIG  
ATOM   7143 C6   LIG     1      19.224  -4.012  17.358  1.00  0.00      LIG  
ATOM   7144 C7   LIG     1      18.098  -3.008  17.547  1.00  0.00      LIG  
ATOM   7145 O2   LIG     1      17.030  -3.585  18.289  1.00  0.00      LIG  
ATOM   7146 O3   LIG     1      20.256  -3.402  16.584  1.00  0.00      LIG  
ATOM   7147 O4   LIG     1      20.229  -5.875  18.487  1.00  0.00      LIG  
ATOM   7148 O5   LIG     1      20.612  -2.321  19.308  1.00  0.00      LIG  
ATOM   7149 H    LIG     1      17.362  -4.289  22.286  1.00  0.00      LIG  
ATOM   7150 H1   LIG     1      17.992  -3.668  23.841  1.00  0.00      LIG  
ATOM   7151 H2   LIG     1      18.484  -5.276  23.267  1.00  0.00      LIG  
ATOM   7152 H3   LIG     1      19.932  -5.512  21.638  1.00  0.00      LIG  
ATOM   7153 H4   LIG     1      21.790  -3.291  21.258  1.00  0.00      LIG  
ATOM   7154 H5   LIG     1      23.280  -5.026  20.427  1.00  0.00      LIG  
ATOM   7155 H6   LIG     1      21.807  -3.823  18.676  1.00  0.00      LIG  
ATOM   7156 H7   LIG     1      18.935  -4.613  19.397  1.00  0.00      LIG  
ATOM   7157 H8   LIG     1      18.837  -4.851  16.772  1.00  0.00      LIG  
ATOM   7158 H9   LIG     1      17.713  -2.678  16.579  1.00  0.00      LIG  
ATOM   7159 H10  LIG     1      18.442  -2.113  18.068  1.00  0.00      LIG  
ATOM   7160 H11  LIG     1      16.709  -4.345  17.766  1.00  0.00      LIG  
ATOM   7161 H12  LIG     1      19.829  -3.000  15.808  1.00  0.00      LIG  
ATOM   7162 H13  LIG     1      20.591  -6.193  19.334  1.00  0.00      LIG  
ATOM   7163 H14  LIG     1      20.425  -2.086  18.382  1.00  0.00      LIG  
TER
REMARK  Energy: 5.75588
REMARK  SimpleFitness: 5.75588
REMARK  FullFitness: -2512.3499
REMARK  InterFull: -28.1226
REMARK  IntraFull: 65.256
REMARK  solvFull: -2905.12
REMARK  surfFull: 355.637
REMARK  extraFull: 0.0
REMARK  deltaGcompsolvpol: -2905.12
REMARK  deltaGcompsolvnonpol: 355.637
REMARK  deltaGprotsolvpol: -2902.69
REMARK  deltaGprotsolvnonpol: 355.646
REMARK  deltaGligsolvpol: -18.009
REMARK  deltaGligsolvnonpol: 6.89748
REMARK  deltaGvdw: -28.1226
REMARK  deltaGelec: 0.0
REMARK  deltaG: -6.350327
REMARK  Cluster: 17
REMARK  ClusterRank: 1
ATOM   7134 C    LIG     1      18.228  -4.259  22.952  1.00  0.00      LIG  
ATOM   7135 C1   LIG     1      19.372  -3.613  22.234  1.00  0.00      LIG  
ATOM   7136 O    LIG     1      19.519  -2.401  22.206  1.00  0.00      LIG  
ATOM   7137 N    LIG     1      20.161  -4.525  21.571  1.00  0.00      LIG  
ATOM   7138 C2   LIG     1      21.291  -4.121  20.746  1.00  0.00      LIG  
ATOM   7139 C3   LIG     1      22.256  -5.277  20.745  1.00  0.00      LIG  
ATOM   7140 O1   LIG     1      21.917  -6.445  20.881  1.00  0.00      LIG  
ATOM   7141 C4   LIG     1      20.919  -3.712  19.307  1.00  0.00      LIG  
ATOM   7142 C5   LIG     1      19.769  -4.540  18.697  1.00  0.00      LIG  
ATOM   7143 C6   LIG     1      19.224  -4.012  17.358  1.00  0.00      LIG  
ATOM   7144 C7   LIG     1      18.098  -3.008  17.547  1.00  0.00      LIG  
ATOM   7145 O2   LIG     1      17.030  -3.585  18.289  1.00  0.00      LIG  
ATOM   7146 O3   LIG     1      20.256  -3.402  16.584  1.00  0.00      LIG  
ATOM   7147 O4   LIG     1      20.229  -5.875  18.487  1.00  0.00      LIG  
ATOM   7148 O5   LIG     1      20.612  -2.321  19.308  1.00  0.00      LIG  
ATOM   7149 H    LIG     1      17.362  -4.289  22.286  1.00  0.00      LIG  
ATOM   7150 H1   LIG     1      17.992  -3.668  23.841  1.00  0.00      LIG  
ATOM   7151 H2   LIG     1      18.484  -5.276  23.267  1.00  0.00      LIG  
ATOM   7152 H3   LIG     1      19.932  -5.512  21.638  1.00  0.00      LIG  
ATOM   7153 H4   LIG     1      21.790  -3.291  21.258  1.00  0.00      LIG  
ATOM   7154 H5   LIG     1      23.280  -5.026  20.427  1.00  0.00      LIG  
ATOM   7155 H6   LIG     1      21.807  -3.823  18.676  1.00  0.00      LIG  
ATOM   7156 H7   LIG     1      18.935  -4.613  19.397  1.00  0.00      LIG  
ATOM   7157 H8   LIG     1      18.837  -4.851  16.772  1.00  0.00      LIG  
ATOM   7158 H9   LIG     1      17.713  -2.678  16.579  1.00  0.00      LIG  
ATOM   7159 H10  LIG     1      18.442  -2.113  18.068  1.00  0.00      LIG  
ATOM   7160 H11  LIG     1      16.709  -4.345  17.766  1.00  0.00      LIG  
ATOM   7161 H12  LIG     1      19.829  -3.000  15.808  1.00  0.00      LIG  
ATOM   7162 H13  LIG     1      20.591  -6.193  19.334  1.00  0.00      LIG  
ATOM   7163 H14  LIG     1      20.425  -2.086  18.382  1.00  0.00      LIG  
TER
REMARK  Energy: 5.75588
REMARK  SimpleFitness: 5.75588
REMARK  FullFitness: -2512.3499
REMARK  InterFull: -28.1226
REMARK  IntraFull: 65.256
REMARK  solvFull: -2905.12
REMARK  surfFull: 355.637
REMARK  extraFull: 0.0
REMARK  deltaGcompsolvpol: -2905.12
REMARK  deltaGcompsolvnonpol: 355.637
REMARK  deltaGprotsolvpol: -2902.69
REMARK  deltaGprotsolvnonpol: 355.646
REMARK  deltaGligsolvpol: -18.009
REMARK  deltaGligsolvnonpol: 6.89748
REMARK  deltaGvdw: -28.1226
REMARK  deltaGelec: 0.0
REMARK  deltaG: -6.350327
REMARK  Cluster: 17
REMARK  ClusterRank: 2
ATOM   7134 C    LIG     1      18.228  -4.259  22.952  1.00  0.00      LIG  
ATOM   7135 C1   LIG     1      19.372  -3.613  22.234  1.00  0.00      LIG  
ATOM   7136 O    LIG     1      19.519  -2.401  22.206  1.00  0.00      LIG  
ATOM   7137 N    LIG     1      20.161  -4.525  21.571  1.00  0.00      LIG  
ATOM   7138 C2   LIG     1      21.291  -4.121  20.746  1.00  0.00      LIG  
ATOM   7139 C3   LIG     1      22.256  -5.277  20.745  1.00  0.00      LIG  
ATOM   7140 O1   LIG     1      21.917  -6.445  20.881  1.00  0.00      LIG  
ATOM   7141 C4   LIG     1      20.919  -3.712  19.307  1.00  0.00      LIG  
ATOM   7142 C5   LIG     1      19.769  -4.540  18.697  1.00  0.00      LIG  
ATOM   7143 C6   LIG     1      19.224  -4.012  17.358  1.00  0.00      LIG  
ATOM   7144 C7   LIG     1      18.098  -3.008  17.547  1.00  0.00      LIG  
ATOM   7145 O2   LIG     1      17.030  -3.585  18.289  1.00  0.00      LIG  
ATOM   7146 O3   LIG     1      20.256  -3.402  16.584  1.00  0.00      LIG  
ATOM   7147 O4   LIG     1      20.229  -5.875  18.487  1.00  0.00      LIG  
ATOM   7148 O5   LIG     1      20.612  -2.321  19.308  1.00  0.00      LIG  
ATOM   7149 H    LIG     1      17.362  -4.289  22.286  1.00  0.00      LIG  
ATOM   7150 H1   LIG     1      17.992  -3.668  23.841  1.00  0.00      LIG  
ATOM   7151 H2   LIG     1      18.484  -5.276  23.267  1.00  0.00      LIG  
ATOM   7152 H3   LIG     1      19.932  -5.512  21.638  1.00  0.00      LIG  
ATOM   7153 H4   LIG     1      21.790  -3.291  21.258  1.00  0.00      LIG  
ATOM   7154 H5   LIG     1      23.280  -5.026  20.427  1.00  0.00      LIG  
ATOM   7155 H6   LIG     1      21.807  -3.823  18.676  1.00  0.00      LIG  
ATOM   7156 H7   LIG     1      18.935  -4.613  19.397  1.00  0.00      LIG  
ATOM   7157 H8   LIG     1      18.837  -4.851  16.772  1.00  0.00      LIG  
ATOM   7158 H9   LIG     1      17.713  -2.678  16.579  1.00  0.00      LIG  
ATOM   7159 H10  LIG     1      18.442  -2.113  18.068  1.00  0.00      LIG  
ATOM   7160 H11  LIG     1      16.709  -4.345  17.766  1.00  0.00      LIG  
ATOM   7161 H12  LIG     1      19.829  -3.000  15.808  1.00  0.00      LIG  
ATOM   7162 H13  LIG     1      20.591  -6.193  19.334  1.00  0.00      LIG  
ATOM   7163 H14  LIG     1      20.425  -2.086  18.382  1.00  0.00      LIG  
TER
REMARK  Energy: 5.75632
REMARK  SimpleFitness: 5.75632
REMARK  FullFitness: -2512.3472
REMARK  InterFull: -28.1399
REMARK  IntraFull: 65.2649
REMARK  solvFull: -2905.11
REMARK  surfFull: 355.638
REMARK  extraFull: 0.0
REMARK  deltaGcompsolvpol: -2905.11
REMARK  deltaGcompsolvnonpol: 355.638
REMARK  deltaGprotsolvpol: -2902.69
REMARK  deltaGprotsolvnonpol: 355.646
REMARK  deltaGligsolvpol: -18.0081
REMARK  deltaGligsolvnonpol: 6.89834
REMARK  deltaGvdw: -28.1399
REMARK  deltaGelec: 0.0
REMARK  deltaG: -6.3513923
REMARK  Cluster: 17
REMARK  ClusterRank: 3
ATOM   7134 C    LIG     1      18.220  -4.256  22.946  1.00  0.00      LIG  
ATOM   7135 C1   LIG     1      19.364  -3.608  22.229  1.00  0.00      LIG  
ATOM   7136 O    LIG     1      19.507  -2.396  22.199  1.00  0.00      LIG  
ATOM   7137 N    LIG     1      20.158  -4.520  21.572  1.00  0.00      LIG  
ATOM   7138 C2   LIG     1      21.288  -4.117  20.747  1.00  0.00      LIG  
ATOM   7139 C3   LIG     1      22.254  -5.271  20.748  1.00  0.00      LIG  
ATOM   7140 O1   LIG     1      21.917  -6.440  20.885  1.00  0.00      LIG  
ATOM   7141 C4   LIG     1      20.918  -3.710  19.307  1.00  0.00      LIG  
ATOM   7142 C5   LIG     1      19.768  -4.540  18.697  1.00  0.00      LIG  
ATOM   7143 C6   LIG     1      19.223  -4.012  17.359  1.00  0.00      LIG  
ATOM   7144 C7   LIG     1      18.095  -3.010  17.548  1.00  0.00      LIG  
ATOM   7145 O2   LIG     1      17.029  -3.587  18.291  1.00  0.00      LIG  
ATOM   7146 O3   LIG     1      20.253  -3.401  16.584  1.00  0.00      LIG  
ATOM   7147 O4   LIG     1      20.231  -5.873  18.487  1.00  0.00      LIG  
ATOM   7148 O5   LIG     1      20.610  -2.319  19.306  1.00  0.00      LIG  
ATOM   7149 H    LIG     1      17.356  -4.294  22.276  1.00  0.00      LIG  
ATOM   7150 H1   LIG     1      17.977  -3.663  23.831  1.00  0.00      LIG  
ATOM   7151 H2   LIG     1      18.479  -5.271  23.266  1.00  0.00      LIG  
ATOM   7152 H3   LIG     1      19.931  -5.508  21.640  1.00  0.00      LIG  
ATOM   7153 H4   LIG     1      21.786  -3.285  21.258  1.00  0.00      LIG  
ATOM   7154 H5   LIG     1      23.278  -5.020  20.430  1.00  0.00      LIG  
ATOM   7155 H6   LIG     1      21.807  -3.821  18.677  1.00  0.00      LIG  
ATOM   7156 H7   LIG     1      18.935  -4.614  19.397  1.00  0.00      LIG  
ATOM   7157 H8   LIG     1      18.836  -4.851  16.773  1.00  0.00      LIG  
ATOM   7158 H9   LIG     1      17.709  -2.682  16.580  1.00  0.00      LIG  
ATOM   7159 H10  LIG     1      18.439  -2.113  18.067  1.00  0.00      LIG  
ATOM   7160 H11  LIG     1      16.709  -4.348  17.771  1.00  0.00      LIG  
ATOM   7161 H12  LIG     1      19.824  -3.001  15.808  1.00  0.00      LIG  
ATOM   7162 H13  LIG     1      20.593  -6.192  19.333  1.00  0.00      LIG  
ATOM   7163 H14  LIG     1      20.423  -2.085  18.380  1.00  0.00      LIG  
TER
REMARK  Energy: 5.75632
REMARK  SimpleFitness: 5.75632
REMARK  FullFitness: -2512.3472
REMARK  InterFull: -28.1399
REMARK  IntraFull: 65.2649
REMARK  solvFull: -2905.11
REMARK  surfFull: 355.638
REMARK  extraFull: 0.0
REMARK  deltaGcompsolvpol: -2905.11
REMARK  deltaGcompsolvnonpol: 355.638
REMARK  deltaGprotsolvpol: -2902.69
REMARK  deltaGprotsolvnonpol: 355.646
REMARK  deltaGligsolvpol: -18.0081
REMARK  deltaGligsolvnonpol: 6.89834
REMARK  deltaGvdw: -28.1399
REMARK  deltaGelec: 0.0
REMARK  deltaG: -6.3513923
REMARK  Cluster: 17
REMARK  ClusterRank: 4
ATOM   7134 C    LIG     1      18.220  -4.256  22.946  1.00  0.00      LIG  
ATOM   7135 C1   LIG     1      19.364  -3.608  22.229  1.00  0.00      LIG  
ATOM   7136 O    LIG     1      19.507  -2.396  22.199  1.00  0.00      LIG  
ATOM   7137 N    LIG     1      20.158  -4.520  21.572  1.00  0.00      LIG  
ATOM   7138 C2   LIG     1      21.288  -4.117  20.747  1.00  0.00      LIG  
ATOM   7139 C3   LIG     1      22.254  -5.271  20.748  1.00  0.00      LIG  
ATOM   7140 O1   LIG     1      21.917  -6.440  20.885  1.00  0.00      LIG  
ATOM   7141 C4   LIG     1      20.918  -3.710  19.307  1.00  0.00      LIG  
ATOM   7142 C5   LIG     1      19.768  -4.540  18.697  1.00  0.00      LIG  
ATOM   7143 C6   LIG     1      19.223  -4.012  17.359  1.00  0.00      LIG  
ATOM   7144 C7   LIG     1      18.095  -3.010  17.548  1.00  0.00      LIG  
ATOM   7145 O2   LIG     1      17.029  -3.587  18.291  1.00  0.00      LIG  
ATOM   7146 O3   LIG     1      20.253  -3.401  16.584  1.00  0.00      LIG  
ATOM   7147 O4   LIG     1      20.231  -5.873  18.487  1.00  0.00      LIG  
ATOM   7148 O5   LIG     1      20.610  -2.319  19.306  1.00  0.00      LIG  
ATOM   7149 H    LIG     1      17.356  -4.294  22.276  1.00  0.00      LIG  
ATOM   7150 H1   LIG     1      17.977  -3.663  23.831  1.00  0.00      LIG  
ATOM   7151 H2   LIG     1      18.479  -5.271  23.266  1.00  0.00      LIG  
ATOM   7152 H3   LIG     1      19.931  -5.508  21.640  1.00  0.00      LIG  
ATOM   7153 H4   LIG     1      21.786  -3.285  21.258  1.00  0.00      LIG  
ATOM   7154 H5   LIG     1      23.278  -5.020  20.430  1.00  0.00      LIG  
ATOM   7155 H6   LIG     1      21.807  -3.821  18.677  1.00  0.00      LIG  
ATOM   7156 H7   LIG     1      18.935  -4.614  19.397  1.00  0.00      LIG  
ATOM   7157 H8   LIG     1      18.836  -4.851  16.773  1.00  0.00      LIG  
ATOM   7158 H9   LIG     1      17.709  -2.682  16.580  1.00  0.00      LIG  
ATOM   7159 H10  LIG     1      18.439  -2.113  18.067  1.00  0.00      LIG  
ATOM   7160 H11  LIG     1      16.709  -4.348  17.771  1.00  0.00      LIG  
ATOM   7161 H12  LIG     1      19.824  -3.001  15.808  1.00  0.00      LIG  
ATOM   7162 H13  LIG     1      20.593  -6.192  19.333  1.00  0.00      LIG  
ATOM   7163 H14  LIG     1      20.423  -2.085  18.380  1.00  0.00      LIG  
TER
REMARK  Energy: 5.75632
REMARK  SimpleFitness: 5.75632
REMARK  FullFitness: -2512.3472
REMARK  InterFull: -28.1399
REMARK  IntraFull: 65.2649
REMARK  solvFull: -2905.11
REMARK  surfFull: 355.638
REMARK  extraFull: 0.0
REMARK  deltaGcompsolvpol: -2905.11
REMARK  deltaGcompsolvnonpol: 355.638
REMARK  deltaGprotsolvpol: -2902.69
REMARK  deltaGprotsolvnonpol: 355.646
REMARK  deltaGligsolvpol: -18.0081
REMARK  deltaGligsolvnonpol: 6.89834
REMARK  deltaGvdw: -28.1399
REMARK  deltaGelec: 0.0
REMARK  deltaG: -6.3513923
REMARK  Cluster: 17
REMARK  ClusterRank: 5
ATOM   7134 C    LIG     1      18.220  -4.256  22.946  1.00  0.00      LIG  
ATOM   7135 C1   LIG     1      19.364  -3.608  22.229  1.00  0.00      LIG  
ATOM   7136 O    LIG     1      19.507  -2.396  22.199  1.00  0.00      LIG  
ATOM   7137 N    LIG     1      20.158  -4.520  21.572  1.00  0.00      LIG  
ATOM   7138 C2   LIG     1      21.288  -4.117  20.747  1.00  0.00      LIG  
ATOM   7139 C3   LIG     1      22.254  -5.271  20.748  1.00  0.00      LIG  
ATOM   7140 O1   LIG     1      21.917  -6.440  20.885  1.00  0.00      LIG  
ATOM   7141 C4   LIG     1      20.918  -3.710  19.307  1.00  0.00      LIG  
ATOM   7142 C5   LIG     1      19.768  -4.540  18.697  1.00  0.00      LIG  
ATOM   7143 C6   LIG     1      19.223  -4.012  17.359  1.00  0.00      LIG  
ATOM   7144 C7   LIG     1      18.095  -3.010  17.548  1.00  0.00      LIG  
ATOM   7145 O2   LIG     1      17.029  -3.587  18.291  1.00  0.00      LIG  
ATOM   7146 O3   LIG     1      20.253  -3.401  16.584  1.00  0.00      LIG  
ATOM   7147 O4   LIG     1      20.231  -5.873  18.487  1.00  0.00      LIG  
ATOM   7148 O5   LIG     1      20.610  -2.319  19.306  1.00  0.00      LIG  
ATOM   7149 H    LIG     1      17.356  -4.294  22.276  1.00  0.00      LIG  
ATOM   7150 H1   LIG     1      17.977  -3.663  23.831  1.00  0.00      LIG  
ATOM   7151 H2   LIG     1      18.479  -5.271  23.266  1.00  0.00      LIG  
ATOM   7152 H3   LIG     1      19.931  -5.508  21.640  1.00  0.00      LIG  
ATOM   7153 H4   LIG     1      21.786  -3.285  21.258  1.00  0.00      LIG  
ATOM   7154 H5   LIG     1      23.278  -5.020  20.430  1.00  0.00      LIG  
ATOM   7155 H6   LIG     1      21.807  -3.821  18.677  1.00  0.00      LIG  
ATOM   7156 H7   LIG     1      18.935  -4.614  19.397  1.00  0.00      LIG  
ATOM   7157 H8   LIG     1      18.836  -4.851  16.773  1.00  0.00      LIG  
ATOM   7158 H9   LIG     1      17.709  -2.682  16.580  1.00  0.00      LIG  
ATOM   7159 H10  LIG     1      18.439  -2.113  18.067  1.00  0.00      LIG  
ATOM   7160 H11  LIG     1      16.709  -4.348  17.771  1.00  0.00      LIG  
ATOM   7161 H12  LIG     1      19.824  -3.001  15.808  1.00  0.00      LIG  
ATOM   7162 H13  LIG     1      20.593  -6.192  19.333  1.00  0.00      LIG  
ATOM   7163 H14  LIG     1      20.423  -2.085  18.380  1.00  0.00      LIG  
TER
REMARK  Energy: 5.76132
REMARK  SimpleFitness: 5.76132
REMARK  FullFitness: -2512.303
REMARK  InterFull: -28.1134
REMARK  IntraFull: 65.3024
REMARK  solvFull: -2905.13
REMARK  surfFull: 355.638
REMARK  extraFull: 0.0
REMARK  deltaGcompsolvpol: -2905.13
REMARK  deltaGcompsolvnonpol: 355.638
REMARK  deltaGprotsolvpol: -2902.69
REMARK  deltaGprotsolvnonpol: 355.646
REMARK  deltaGligsolvpol: -18.023
REMARK  deltaGligsolvnonpol: 6.89444
REMARK  deltaGvdw: -28.1134
REMARK  deltaGelec: 0.0
REMARK  deltaG: -6.348815
REMARK  Cluster: 17
REMARK  ClusterRank: 6
ATOM   7134 C    LIG     1      18.231  -4.259  22.966  1.00  0.00      LIG  
ATOM   7135 C1   LIG     1      19.383  -3.623  22.250  1.00  0.00      LIG  
ATOM   7136 O    LIG     1      19.544  -2.412  22.230  1.00  0.00      LIG  
ATOM   7137 N    LIG     1      20.160  -4.539  21.581  1.00  0.00      LIG  
ATOM   7138 C2   LIG     1      21.292  -4.142  20.755  1.00  0.00      LIG  
ATOM   7139 C3   LIG     1      22.249  -5.305  20.749  1.00  0.00      LIG  
ATOM   7140 O1   LIG     1      21.904  -6.470  20.890  1.00  0.00      LIG  
ATOM   7141 C4   LIG     1      20.920  -3.727  19.317  1.00  0.00      LIG  
ATOM   7142 C5   LIG     1      19.772  -4.556  18.703  1.00  0.00      LIG  
ATOM   7143 C6   LIG     1      19.226  -4.022  17.367  1.00  0.00      LIG  
ATOM   7144 C7   LIG     1      18.100  -3.019  17.558  1.00  0.00      LIG  
ATOM   7145 O2   LIG     1      17.035  -3.594  18.303  1.00  0.00      LIG  
ATOM   7146 O3   LIG     1      20.258  -3.411  16.594  1.00  0.00      LIG  
ATOM   7147 O4   LIG     1      20.237  -5.887  18.485  1.00  0.00      LIG  
ATOM   7148 O5   LIG     1      20.608  -2.337  19.326  1.00  0.00      LIG  
ATOM   7149 H    LIG     1      17.360  -4.263  22.304  1.00  0.00      LIG  
ATOM   7150 H1   LIG     1      18.011  -3.679  23.866  1.00  0.00      LIG  
ATOM   7151 H2   LIG     1      18.469  -5.286  23.262  1.00  0.00      LIG  
ATOM   7152 H3   LIG     1      19.921  -5.524  21.642  1.00  0.00      LIG  
ATOM   7153 H4   LIG     1      21.798  -3.316  21.266  1.00  0.00      LIG  
ATOM   7154 H5   LIG     1      23.272  -5.061  20.425  1.00  0.00      LIG  
ATOM   7155 H6   LIG     1      21.809  -3.833  18.687  1.00  0.00      LIG  
ATOM   7156 H7   LIG     1      18.938  -4.636  19.403  1.00  0.00      LIG  
ATOM   7157 H8   LIG     1      18.839  -4.860  16.778  1.00  0.00      LIG  
ATOM   7158 H9   LIG     1      17.712  -2.691  16.590  1.00  0.00      LIG  
ATOM   7159 H10  LIG     1      18.446  -2.121  18.075  1.00  0.00      LIG  
ATOM   7160 H11  LIG     1      16.712  -4.355  17.783  1.00  0.00      LIG  
ATOM   7161 H12  LIG     1      19.831  -3.008  15.818  1.00  0.00      LIG  
ATOM   7162 H13  LIG     1      20.598  -6.210  19.331  1.00  0.00      LIG  
ATOM   7163 H14  LIG     1      20.411  -2.100  18.403  1.00  0.00      LIG  
TER
REMARK  Energy: 5.76132
REMARK  SimpleFitness: 5.76132
REMARK  FullFitness: -2512.303
REMARK  InterFull: -28.1134
REMARK  IntraFull: 65.3024
REMARK  solvFull: -2905.13
REMARK  surfFull: 355.638
REMARK  extraFull: 0.0
REMARK  deltaGcompsolvpol: -2905.13
REMARK  deltaGcompsolvnonpol: 355.638
REMARK  deltaGprotsolvpol: -2902.69
REMARK  deltaGprotsolvnonpol: 355.646
REMARK  deltaGligsolvpol: -18.023
REMARK  deltaGligsolvnonpol: 6.89444
REMARK  deltaGvdw: -28.1134
REMARK  deltaGelec: 0.0
REMARK  deltaG: -6.348815
REMARK  Cluster: 17
REMARK  ClusterRank: 7
ATOM   7134 C    LIG     1      18.231  -4.259  22.966  1.00  0.00      LIG  
ATOM   7135 C1   LIG     1      19.383  -3.623  22.250  1.00  0.00      LIG  
ATOM   7136 O    LIG     1      19.544  -2.412  22.230  1.00  0.00      LIG  
ATOM   7137 N    LIG     1      20.160  -4.539  21.581  1.00  0.00      LIG  
ATOM   7138 C2   LIG     1      21.292  -4.142  20.755  1.00  0.00      LIG  
ATOM   7139 C3   LIG     1      22.249  -5.305  20.749  1.00  0.00      LIG  
ATOM   7140 O1   LIG     1      21.904  -6.470  20.890  1.00  0.00      LIG  
ATOM   7141 C4   LIG     1      20.920  -3.727  19.317  1.00  0.00      LIG  
ATOM   7142 C5   LIG     1      19.772  -4.556  18.703  1.00  0.00      LIG  
ATOM   7143 C6   LIG     1      19.226  -4.022  17.367  1.00  0.00      LIG  
ATOM   7144 C7   LIG     1      18.100  -3.019  17.558  1.00  0.00      LIG  
ATOM   7145 O2   LIG     1      17.035  -3.594  18.303  1.00  0.00      LIG  
ATOM   7146 O3   LIG     1      20.258  -3.411  16.594  1.00  0.00      LIG  
ATOM   7147 O4   LIG     1      20.237  -5.887  18.485  1.00  0.00      LIG  
ATOM   7148 O5   LIG     1      20.608  -2.337  19.326  1.00  0.00      LIG  
ATOM   7149 H    LIG     1      17.360  -4.263  22.304  1.00  0.00      LIG  
ATOM   7150 H1   LIG     1      18.011  -3.679  23.866  1.00  0.00      LIG  
ATOM   7151 H2   LIG     1      18.469  -5.286  23.262  1.00  0.00      LIG  
ATOM   7152 H3   LIG     1      19.921  -5.524  21.642  1.00  0.00      LIG  
ATOM   7153 H4   LIG     1      21.798  -3.316  21.266  1.00  0.00      LIG  
ATOM   7154 H5   LIG     1      23.272  -5.061  20.425  1.00  0.00      LIG  
ATOM   7155 H6   LIG     1      21.809  -3.833  18.687  1.00  0.00      LIG  
ATOM   7156 H7   LIG     1      18.938  -4.636  19.403  1.00  0.00      LIG  
ATOM   7157 H8   LIG     1      18.839  -4.860  16.778  1.00  0.00      LIG  
ATOM   7158 H9   LIG     1      17.712  -2.691  16.590  1.00  0.00      LIG  
ATOM   7159 H10  LIG     1      18.446  -2.121  18.075  1.00  0.00      LIG  
ATOM   7160 H11  LIG     1      16.712  -4.355  17.783  1.00  0.00      LIG  
ATOM   7161 H12  LIG     1      19.831  -3.008  15.818  1.00  0.00      LIG  
ATOM   7162 H13  LIG     1      20.598  -6.210  19.331  1.00  0.00      LIG  
ATOM   7163 H14  LIG     1      20.411  -2.100  18.403  1.00  0.00      LIG  
TER
REMARK  Energy: 8.02109
REMARK  SimpleFitness: 8.02109
REMARK  FullFitness: -2512.0703
REMARK  InterFull: -15.1354
REMARK  IntraFull: 58.6139
REMARK  solvFull: -2909.43
REMARK  surfFull: 353.881
REMARK  extraFull: 0.0
REMARK  deltaGcompsolvpol: -2909.43
REMARK  deltaGcompsolvnonpol: 353.881
REMARK  deltaGprotsolvpol: -2902.69
REMARK  deltaGprotsolvnonpol: 355.646
REMARK  deltaGligsolvpol: -15.2794
REMARK  deltaGligsolvnonpol: 6.61206
REMARK  deltaGvdw: -15.1354
REMARK  deltaGelec: 0.0
REMARK  deltaG: -5.691665
REMARK  Cluster: 18
REMARK  ClusterRank: 0
ATOM   7134 C    LIG     1       8.360  10.977  16.483  1.00  0.00      LIG  
ATOM   7135 C1   LIG     1       7.030  11.617  16.232  1.00  0.00      LIG  
ATOM   7136 O    LIG     1       6.917  12.702  15.685  1.00  0.00      LIG  
ATOM   7137 N    LIG     1       5.983  10.839  16.675  1.00  0.00      LIG  
ATOM   7138 C2   LIG     1       4.589  11.241  16.524  1.00  0.00      LIG  
ATOM   7139 C3   LIG     1       4.080  10.621  15.245  1.00  0.00      LIG  
ATOM   7140 O1   LIG     1       2.887  10.506  15.004  1.00  0.00      LIG  
ATOM   7141 C4   LIG     1       3.714  10.870  17.735  1.00  0.00      LIG  
ATOM   7142 C5   LIG     1       4.038   9.505  18.368  1.00  0.00      LIG  
ATOM   7143 C6   LIG     1       3.027   9.134  19.461  1.00  0.00      LIG  
ATOM   7144 C7   LIG     1       3.178   7.687  19.920  1.00  0.00      LIG  
ATOM   7145 O2   LIG     1       4.530   7.407  20.272  1.00  0.00      LIG  
ATOM   7146 O3   LIG     1       3.172   9.986  20.597  1.00  0.00      LIG  
ATOM   7147 O4   LIG     1       4.015   8.491  17.363  1.00  0.00      LIG  
ATOM   7148 O5   LIG     1       3.851  11.908  18.705  1.00  0.00      LIG  
ATOM   7149 H    LIG     1       8.509  10.844  17.558  1.00  0.00      LIG  
ATOM   7150 H1   LIG     1       9.145  11.629  16.092  1.00  0.00      LIG  
ATOM   7151 H2   LIG     1       8.411  10.010  15.975  1.00  0.00      LIG  
ATOM   7152 H3   LIG     1       6.184   9.911  17.035  1.00  0.00      LIG  
ATOM   7153 H4   LIG     1       4.567  12.324  16.361  1.00  0.00      LIG  
ATOM   7154 H5   LIG     1       4.799  10.606  14.410  1.00  0.00      LIG  
ATOM   7155 H6   LIG     1       2.661  10.871  17.438  1.00  0.00      LIG  
ATOM   7156 H7   LIG     1       5.040   9.538  18.807  1.00  0.00      LIG  
ATOM   7157 H8   LIG     1       2.011   9.267  19.080  1.00  0.00      LIG  
ATOM   7158 H9   LIG     1       2.888   6.999  19.122  1.00  0.00      LIG  
ATOM   7159 H10  LIG     1       2.556   7.488  20.798  1.00  0.00      LIG  
ATOM   7160 H11  LIG     1       4.661   6.456  20.103  1.00  0.00      LIG  
ATOM   7161 H12  LIG     1       3.953   9.661  21.080  1.00  0.00      LIG  
ATOM   7162 H13  LIG     1       3.132   8.516  16.954  1.00  0.00      LIG  
ATOM   7163 H14  LIG     1       3.492  11.552  19.539  1.00  0.00      LIG  
TER
REMARK  Energy: 8.01411
REMARK  SimpleFitness: 8.01411
REMARK  FullFitness: -2510.8418
REMARK  InterFull: -16.7005
REMARK  IntraFull: 58.7107
REMARK  solvFull: -2906.86
REMARK  surfFull: 354.008
REMARK  extraFull: 0.0
REMARK  deltaGcompsolvpol: -2906.86
REMARK  deltaGcompsolvnonpol: 354.008
REMARK  deltaGprotsolvpol: -2902.69
REMARK  deltaGprotsolvnonpol: 355.646
REMARK  deltaGligsolvpol: -15.5966
REMARK  deltaGligsolvnonpol: 6.59843
REMARK  deltaGvdw: -16.7005
REMARK  deltaGelec: 0.0
REMARK  deltaG: -5.649736
REMARK  Cluster: 18
REMARK  ClusterRank: 1
ATOM   7134 C    LIG     1       8.494  10.922  16.430  1.00  0.00      LIG  
ATOM   7135 C1   LIG     1       7.117  11.395  16.083  1.00  0.00      LIG  
ATOM   7136 O    LIG     1       6.918  12.318  15.309  1.00  0.00      LIG  
ATOM   7137 N    LIG     1       6.137  10.621  16.663  1.00  0.00      LIG  
ATOM   7138 C2   LIG     1       4.716  10.839  16.413  1.00  0.00      LIG  
ATOM   7139 C3   LIG     1       4.328   9.961  15.247  1.00  0.00      LIG  
ATOM   7140 O1   LIG     1       3.167   9.665  15.007  1.00  0.00      LIG  
ATOM   7141 C4   LIG     1       3.833  10.579  17.647  1.00  0.00      LIG  
ATOM   7142 C5   LIG     1       4.264   9.382  18.514  1.00  0.00      LIG  
ATOM   7143 C6   LIG     1       3.231   9.098  19.612  1.00  0.00      LIG  
ATOM   7144 C7   LIG     1       3.440   7.748  20.294  1.00  0.00      LIG  
ATOM   7145 O2   LIG     1       4.803   7.573  20.669  1.00  0.00      LIG  
ATOM   7146 O3   LIG     1       3.274  10.117  20.610  1.00  0.00      LIG  
ATOM   7147 O4   LIG     1       4.408   8.216  17.705  1.00  0.00      LIG  
ATOM   7148 O5   LIG     1       3.819  11.771  18.431  1.00  0.00      LIG  
ATOM   7149 H    LIG     1       8.590  10.809  17.514  1.00  0.00      LIG  
ATOM   7150 H1   LIG     1       9.218  11.663  16.086  1.00  0.00      LIG  
ATOM   7151 H2   LIG     1       8.688   9.965  15.937  1.00  0.00      LIG  
ATOM   7152 H3   LIG     1       6.416   9.805  17.198  1.00  0.00      LIG  
ATOM   7153 H4   LIG     1       4.590  11.871  16.068  1.00  0.00      LIG  
ATOM   7154 H5   LIG     1       5.075   9.894  14.440  1.00  0.00      LIG  
ATOM   7155 H6   LIG     1       2.800  10.417  17.327  1.00  0.00      LIG  
ATOM   7156 H7   LIG     1       5.230   9.602  18.980  1.00  0.00      LIG  
ATOM   7157 H8   LIG     1       2.226   9.108  19.181  1.00  0.00      LIG  
ATOM   7158 H9   LIG     1       3.165   6.927  19.627  1.00  0.00      LIG  
ATOM   7159 H10  LIG     1       2.835   7.673  21.202  1.00  0.00      LIG  
ATOM   7160 H11  LIG     1       5.301   7.488  19.836  1.00  0.00      LIG  
ATOM   7161 H12  LIG     1       4.034   9.908  21.182  1.00  0.00      LIG  
ATOM   7162 H13  LIG     1       3.554   8.069  17.261  1.00  0.00      LIG  
ATOM   7163 H14  LIG     1       3.457  11.521  19.302  1.00  0.00      LIG  
TER
REMARK  Energy: 8.06834
REMARK  SimpleFitness: 8.06834
REMARK  FullFitness: -2510.6719
REMARK  InterFull: -16.7221
REMARK  IntraFull: 58.6771
REMARK  solvFull: -2906.65
REMARK  surfFull: 354.023
REMARK  extraFull: 0.0
REMARK  deltaGcompsolvpol: -2906.65
REMARK  deltaGcompsolvnonpol: 354.023
REMARK  deltaGprotsolvpol: -2902.69
REMARK  deltaGprotsolvnonpol: 355.646
REMARK  deltaGligsolvpol: -15.6118
REMARK  deltaGligsolvnonpol: 6.59734
REMARK  deltaGvdw: -16.7221
REMARK  deltaGelec: 0.0
REMARK  deltaG: -5.636461
REMARK  Cluster: 18
REMARK  ClusterRank: 2
ATOM   7134 C    LIG     1       8.435  10.915  16.400  1.00  0.00      LIG  
ATOM   7135 C1   LIG     1       7.049  11.351  16.038  1.00  0.00      LIG  
ATOM   7136 O    LIG     1       6.834  12.256  15.247  1.00  0.00      LIG  
ATOM   7137 N    LIG     1       6.081  10.563  16.621  1.00  0.00      LIG  
ATOM   7138 C2   LIG     1       4.657  10.747  16.358  1.00  0.00      LIG  
ATOM   7139 C3   LIG     1       4.295   9.845  15.204  1.00  0.00      LIG  
ATOM   7140 O1   LIG     1       3.139   9.527  14.958  1.00  0.00      LIG  
ATOM   7141 C4   LIG     1       3.771  10.489  17.590  1.00  0.00      LIG  
ATOM   7142 C5   LIG     1       4.220   9.315  18.480  1.00  0.00      LIG  
ATOM   7143 C6   LIG     1       3.184   9.027  19.574  1.00  0.00      LIG  
ATOM   7144 C7   LIG     1       3.414   7.692  20.278  1.00  0.00      LIG  
ATOM   7145 O2   LIG     1       4.775   7.549  20.671  1.00  0.00      LIG  
ATOM   7146 O3   LIG     1       3.198  10.062  20.557  1.00  0.00      LIG  
ATOM   7147 O4   LIG     1       4.395   8.139  17.691  1.00  0.00      LIG  
ATOM   7148 O5   LIG     1       3.726  11.692  18.355  1.00  0.00      LIG  
ATOM   7149 H    LIG     1       8.506  10.738  17.478  1.00  0.00      LIG  
ATOM   7150 H1   LIG     1       9.135  11.708  16.128  1.00  0.00      LIG  
ATOM   7151 H2   LIG     1       8.686  10.000  15.856  1.00  0.00      LIG  
ATOM   7152 H3   LIG     1       6.374   9.758  17.165  1.00  0.00      LIG  
ATOM   7153 H4   LIG     1       4.512  11.770  15.995  1.00  0.00      LIG  
ATOM   7154 H5   LIG     1       5.049   9.781  14.403  1.00  0.00      LIG  
ATOM   7155 H6   LIG     1       2.743  10.299  17.265  1.00  0.00      LIG  
ATOM   7156 H7   LIG     1       5.178   9.564  18.949  1.00  0.00      LIG  
ATOM   7157 H8   LIG     1       2.184   9.012  19.133  1.00  0.00      LIG  
ATOM   7158 H9   LIG     1       3.161   6.857  19.620  1.00  0.00      LIG  
ATOM   7159 H10  LIG     1       2.799   7.619  21.180  1.00  0.00      LIG  
ATOM   7160 H11  LIG     1       5.285   7.448  19.847  1.00  0.00      LIG  
ATOM   7161 H12  LIG     1       3.953   9.873  21.142  1.00  0.00      LIG  
ATOM   7162 H13  LIG     1       3.546   7.961  17.249  1.00  0.00      LIG  
ATOM   7163 H14  LIG     1       3.368  11.447  19.229  1.00  0.00      LIG  
TER
REMARK  Energy: 9.52011
REMARK  SimpleFitness: 9.52011
REMARK  FullFitness: -2508.719
REMARK  InterFull: -20.0745
REMARK  IntraFull: 62.5266
REMARK  solvFull: -2905.29
REMARK  surfFull: 354.119
REMARK  extraFull: 0.0
REMARK  deltaGcompsolvpol: -2905.29
REMARK  deltaGcompsolvnonpol: 354.119
REMARK  deltaGprotsolvpol: -2902.69
REMARK  deltaGprotsolvnonpol: 355.646
REMARK  deltaGligsolvpol: -17.0159
REMARK  deltaGligsolvnonpol: 6.67432
REMARK  deltaGvdw: -20.0745
REMARK  deltaGelec: 0.0
REMARK  deltaG: -5.782646
REMARK  Cluster: 18
REMARK  ClusterRank: 3
ATOM   7134 C    LIG     1       8.554  11.068  15.957  1.00  0.00      LIG  
ATOM   7135 C1   LIG     1       7.114  11.474  15.877  1.00  0.00      LIG  
ATOM   7136 O    LIG     1       6.725  12.372  15.150  1.00  0.00      LIG  
ATOM   7137 N    LIG     1       6.302  10.644  16.616  1.00  0.00      LIG  
ATOM   7138 C2   LIG     1       4.847  10.749  16.620  1.00  0.00      LIG  
ATOM   7139 C3   LIG     1       4.338   9.832  15.533  1.00  0.00      LIG  
ATOM   7140 O1   LIG     1       3.175   9.463  15.477  1.00  0.00      LIG  
ATOM   7141 C4   LIG     1       4.216  10.410  17.984  1.00  0.00      LIG  
ATOM   7142 C5   LIG     1       4.972   9.337  18.782  1.00  0.00      LIG  
ATOM   7143 C6   LIG     1       4.285   9.019  20.122  1.00  0.00      LIG  
ATOM   7144 C7   LIG     1       2.871   8.443  20.020  1.00  0.00      LIG  
ATOM   7145 O2   LIG     1       2.814   7.282  19.200  1.00  0.00      LIG  
ATOM   7146 O3   LIG     1       5.095   8.119  20.882  1.00  0.00      LIG  
ATOM   7147 O4   LIG     1       5.142   8.162  17.987  1.00  0.00      LIG  
ATOM   7148 O5   LIG     1       4.151  11.607  18.759  1.00  0.00      LIG  
ATOM   7149 H    LIG     1       9.174  11.903  15.622  1.00  0.00      LIG  
ATOM   7150 H1   LIG     1       8.722  10.202  15.311  1.00  0.00      LIG  
ATOM   7151 H2   LIG     1       8.824  10.819  16.988  1.00  0.00      LIG  
ATOM   7152 H3   LIG     1       6.725   9.846  17.080  1.00  0.00      LIG  
ATOM   7153 H4   LIG     1       4.582  11.766  16.311  1.00  0.00      LIG  
ATOM   7154 H5   LIG     1       4.950   9.804  14.616  1.00  0.00      LIG  
ATOM   7155 H6   LIG     1       3.181  10.090  17.834  1.00  0.00      LIG  
ATOM   7156 H7   LIG     1       5.976   9.702  19.017  1.00  0.00      LIG  
ATOM   7157 H8   LIG     1       4.226   9.938  20.711  1.00  0.00      LIG  
ATOM   7158 H9   LIG     1       2.183   9.183  19.603  1.00  0.00      LIG  
ATOM   7159 H10  LIG     1       2.504   8.158  21.010  1.00  0.00      LIG  
ATOM   7160 H11  LIG     1       3.474   6.658  19.555  1.00  0.00      LIG  
ATOM   7161 H12  LIG     1       6.010   8.441  20.815  1.00  0.00      LIG  
ATOM   7162 H13  LIG     1       4.298   7.677  18.030  1.00  0.00      LIG  
ATOM   7163 H14  LIG     1       3.764  11.371  19.618  1.00  0.00      LIG  
TER
REMARK  Energy: 9.52011
REMARK  SimpleFitness: 9.52011
REMARK  FullFitness: -2508.719
REMARK  InterFull: -20.0745
REMARK  IntraFull: 62.5266
REMARK  solvFull: -2905.29
REMARK  surfFull: 354.119
REMARK  extraFull: 0.0
REMARK  deltaGcompsolvpol: -2905.29
REMARK  deltaGcompsolvnonpol: 354.119
REMARK  deltaGprotsolvpol: -2902.69
REMARK  deltaGprotsolvnonpol: 355.646
REMARK  deltaGligsolvpol: -17.0159
REMARK  deltaGligsolvnonpol: 6.67432
REMARK  deltaGvdw: -20.0745
REMARK  deltaGelec: 0.0
REMARK  deltaG: -5.782646
REMARK  Cluster: 18
REMARK  ClusterRank: 4
ATOM   7134 C    LIG     1       8.554  11.068  15.957  1.00  0.00      LIG  
ATOM   7135 C1   LIG     1       7.114  11.474  15.877  1.00  0.00      LIG  
ATOM   7136 O    LIG     1       6.725  12.372  15.150  1.00  0.00      LIG  
ATOM   7137 N    LIG     1       6.302  10.644  16.616  1.00  0.00      LIG  
ATOM   7138 C2   LIG     1       4.847  10.749  16.620  1.00  0.00      LIG  
ATOM   7139 C3   LIG     1       4.338   9.832  15.533  1.00  0.00      LIG  
ATOM   7140 O1   LIG     1       3.175   9.463  15.477  1.00  0.00      LIG  
ATOM   7141 C4   LIG     1       4.216  10.410  17.984  1.00  0.00      LIG  
ATOM   7142 C5   LIG     1       4.972   9.337  18.782  1.00  0.00      LIG  
ATOM   7143 C6   LIG     1       4.285   9.019  20.122  1.00  0.00      LIG  
ATOM   7144 C7   LIG     1       2.871   8.443  20.020  1.00  0.00      LIG  
ATOM   7145 O2   LIG     1       2.814   7.282  19.200  1.00  0.00      LIG  
ATOM   7146 O3   LIG     1       5.095   8.119  20.882  1.00  0.00      LIG  
ATOM   7147 O4   LIG     1       5.142   8.162  17.987  1.00  0.00      LIG  
ATOM   7148 O5   LIG     1       4.151  11.607  18.759  1.00  0.00      LIG  
ATOM   7149 H    LIG     1       9.174  11.903  15.622  1.00  0.00      LIG  
ATOM   7150 H1   LIG     1       8.722  10.202  15.311  1.00  0.00      LIG  
ATOM   7151 H2   LIG     1       8.824  10.819  16.988  1.00  0.00      LIG  
ATOM   7152 H3   LIG     1       6.725   9.846  17.080  1.00  0.00      LIG  
ATOM   7153 H4   LIG     1       4.582  11.766  16.311  1.00  0.00      LIG  
ATOM   7154 H5   LIG     1       4.950   9.804  14.616  1.00  0.00      LIG  
ATOM   7155 H6   LIG     1       3.181  10.090  17.834  1.00  0.00      LIG  
ATOM   7156 H7   LIG     1       5.976   9.702  19.017  1.00  0.00      LIG  
ATOM   7157 H8   LIG     1       4.226   9.938  20.711  1.00  0.00      LIG  
ATOM   7158 H9   LIG     1       2.183   9.183  19.603  1.00  0.00      LIG  
ATOM   7159 H10  LIG     1       2.504   8.158  21.010  1.00  0.00      LIG  
ATOM   7160 H11  LIG     1       3.474   6.658  19.555  1.00  0.00      LIG  
ATOM   7161 H12  LIG     1       6.010   8.441  20.815  1.00  0.00      LIG  
ATOM   7162 H13  LIG     1       4.298   7.677  18.030  1.00  0.00      LIG  
ATOM   7163 H14  LIG     1       3.764  11.371  19.618  1.00  0.00      LIG  
TER
REMARK  Energy: 9.61897
REMARK  SimpleFitness: 9.61897
REMARK  FullFitness: -2508.6074
REMARK  InterFull: -19.7417
REMARK  IntraFull: 62.3451
REMARK  solvFull: -2905.29
REMARK  surfFull: 354.079
REMARK  extraFull: 0.0
REMARK  deltaGcompsolvpol: -2905.29
REMARK  deltaGcompsolvnonpol: 354.079
REMARK  deltaGprotsolvpol: -2902.69
REMARK  deltaGprotsolvnonpol: 355.646
REMARK  deltaGligsolvpol: -16.951
REMARK  deltaGligsolvnonpol: 6.67398
REMARK  deltaGvdw: -19.7417
REMARK  deltaGelec: 0.0
REMARK  deltaG: -5.758885
REMARK  Cluster: 18
REMARK  ClusterRank: 5
ATOM   7134 C    LIG     1       8.504  11.129  16.005  1.00  0.00      LIG  
ATOM   7135 C1   LIG     1       7.058  11.500  15.891  1.00  0.00      LIG  
ATOM   7136 O    LIG     1       6.664  12.384  15.145  1.00  0.00      LIG  
ATOM   7137 N    LIG     1       6.250  10.666  16.628  1.00  0.00      LIG  
ATOM   7138 C2   LIG     1       4.794  10.754  16.617  1.00  0.00      LIG  
ATOM   7139 C3   LIG     1       4.304   9.807  15.546  1.00  0.00      LIG  
ATOM   7140 O1   LIG     1       3.143   9.427  15.486  1.00  0.00      LIG  
ATOM   7141 C4   LIG     1       4.152  10.443  17.983  1.00  0.00      LIG  
ATOM   7142 C5   LIG     1       4.911   9.400  18.818  1.00  0.00      LIG  
ATOM   7143 C6   LIG     1       4.210   9.113  20.159  1.00  0.00      LIG  
ATOM   7144 C7   LIG     1       2.810   8.501  20.061  1.00  0.00      LIG  
ATOM   7145 O2   LIG     1       2.791   7.309  19.287  1.00  0.00      LIG  
ATOM   7146 O3   LIG     1       5.029   8.261  20.961  1.00  0.00      LIG  
ATOM   7147 O4   LIG     1       5.111   8.207  18.057  1.00  0.00      LIG  
ATOM   7148 O5   LIG     1       4.064  11.659  18.726  1.00  0.00      LIG  
ATOM   7149 H    LIG     1       9.113  11.975  15.675  1.00  0.00      LIG  
ATOM   7150 H1   LIG     1       8.708  10.261  15.373  1.00  0.00      LIG  
ATOM   7151 H2   LIG     1       8.758  10.898  17.045  1.00  0.00      LIG  
ATOM   7152 H3   LIG     1       6.679   9.879  17.105  1.00  0.00      LIG  
ATOM   7153 H4   LIG     1       4.519  11.760  16.283  1.00  0.00      LIG  
ATOM   7154 H5   LIG     1       4.923   9.764  14.636  1.00  0.00      LIG  
ATOM   7155 H6   LIG     1       3.124  10.107  17.829  1.00  0.00      LIG  
ATOM   7156 H7   LIG     1       5.908   9.784  19.055  1.00  0.00      LIG  
ATOM   7157 H8   LIG     1       4.116  10.050  20.713  1.00  0.00      LIG
[truncated: 339,981 more chars]
