# Supplementary material for: Genetic Uniformity of a Specific Region in SARS-CoV-2 Genome and In-Silico Target-Oriented Repurposing of N-Acetyl-D-Glucosamine
Source: Preprints.org preprint supplement (doi:10.20944/preprints202005.0397.v1), 2020-05-24
Supplement: Supplementary file 7 [file supplementary › S7 File/complex.crd]

* PYCHARMM CRD
*  DATE:     5/ 8/20     12:11:43      CREATED BY USER: root
*
 7163
    1    1 ALA  N     -5.48245  -2.52882  27.58753 1S   50     1.00000
    2    1 ALA  HT1   -4.58332  -2.56926  27.06314 1S   50     0.00000
    3    1 ALA  HT2   -6.27936  -2.57608  26.92070 1S   50     0.00000
    4    1 ALA  HT3   -5.53587  -3.32988  28.25008 1S   50     0.00000
    5    1 ALA  CA    -5.55294  -1.24754  28.33696 1S   50     1.00000
    6    1 ALA  HA    -5.35908  -0.44590  27.64143 1S   50     0.00000
    7    1 ALA  CB    -6.96240  -1.09826  28.94930 1S   50     1.00000
    8    1 ALA  HB1   -7.19939  -1.94165  29.63418 1S   50     0.00000
    9    1 ALA  HB2   -7.72772  -1.07586  28.14444 1S   50     0.00000
   10    1 ALA  HB3   -7.04129  -0.14754  29.52018 1S   50     0.00000
   11    1 ALA  C     -4.52053  -1.17792  29.41919 1S   50     1.00000
   12    1 ALA  O     -4.84575  -0.93752  30.57198 1S   50     1.00000
   13    2 SER  N     -3.23466  -1.40542  29.09062 1S   51     1.00000
   14    2 SER  HN    -2.97912  -1.61978  28.14795 1S   51     0.00000
   15    2 SER  CA    -2.14876  -1.38213  30.04841 1S   51     1.00000
   16    2 SER  HA    -2.53658  -1.45633  31.05414 1S   51     0.00000
   17    2 SER  CB    -1.20255  -2.57735  29.78635 1S   51     1.00000
   18    2 SER  HB1   -0.88307  -2.52350  28.73061 1S   51     0.00000
   19    2 SER  HB2   -1.75667  -3.52165  29.96888 1S   51     0.00000
   20    2 SER  OG    -0.01745  -2.62289  30.56142 1S   51     1.00000
   21    2 SER  HG1   -0.26344  -2.98374  31.42403 1S   51     0.00000
   22    2 SER  C     -1.41888  -0.06999  29.90336 1S   51     1.00000
   23    2 SER  O     -1.81187   0.79174  29.12330 1S   51     1.00000
   24    3 TRP  N     -0.32710   0.09677  30.67866 1S   52     1.00000
   25    3 TRP  HN    -0.05970  -0.63654  31.30239 1S   52     0.00000
   26    3 TRP  CA     0.55088   1.23170  30.64561 1S   52     1.00000
   27    3 TRP  HA     0.07646   2.02161  30.09728 1S   52     0.00000
   28    3 TRP  CB     0.89718   1.70683  32.07025 1S   52     1.00000
   29    3 TRP  HB1    1.85434   2.26665  32.07980 1S   52     0.00000
   30    3 TRP  HB2    1.00375   0.81174  32.72593 1S   52     0.00000
   31    3 TRP  CG    -0.15977   2.61123  32.66259 1S   52     1.00000
   32    3 TRP  CD1   -1.22193   2.24435  33.42056 1S   52     1.00000
   33    3 TRP  HD1   -1.46280   1.22600  33.64376 1S   52     0.00000
   34    3 TRP  NE1   -1.94626   3.34331  33.79938 1S   52     1.00000
   35    3 TRP  HE1   -2.75097   3.32942  34.35591 1S   52     0.00000
   36    3 TRP  CE2   -1.37783   4.45685  33.25840 1S   52     1.00000
   37    3 TRP  CD2   -0.24458   4.04182  32.52944 1S   52     1.00000
   38    3 TRP  CE3    0.54552   4.96326  31.86000 1S   52     1.00000
   39    3 TRP  HE3    1.40497   4.66117  31.29406 1S   52     0.00000
   40    3 TRP  CZ3    0.18408   6.31615  31.93179 1S   52     1.00000
   41    3 TRP  HZ3    0.77889   7.05296  31.41432 1S   52     0.00000
   42    3 TRP  CZ2   -1.74373   5.79211  33.33123 1S   52     1.00000
   43    3 TRP  HZ2   -2.61975   6.11198  33.87465 1S   52     0.00000
   44    3 TRP  CH2   -0.94438   6.72501  32.65986 1S   52     1.00000
   45    3 TRP  HH2   -1.21258   7.76981  32.69358 1S   52     0.00000
   46    3 TRP  C      1.82226   0.93117  29.90586 1S   52     1.00000
   47    3 TRP  O      2.31111   1.78261  29.16276 1S   52     1.00000
   48    4 PHE  N      2.40151  -0.27230  30.09733 1S   53     1.00000
   49    4 PHE  HN     1.98629  -0.97872  30.66307 1S   53     0.00000
   50    4 PHE  CA     3.69658  -0.59452  29.55504 1S   53     1.00000
   51    4 PHE  HA     4.18795   0.31457  29.25605 1S   53     0.00000
   52    4 PHE  CB     4.60521  -1.35179  30.55559 1S   53     1.00000
   53    4 PHE  HB1    5.62934  -1.46966  30.14247 1S   53     0.00000
   54    4 PHE  HB2    4.18545  -2.35471  30.77953 1S   53     0.00000
   55    4 PHE  CG     4.71688  -0.60678  31.85455 1S   53     1.00000
   56    4 PHE  CD1    5.72874   0.34648  32.05041 1S   53     1.00000
   57    4 PHE  HD1    6.43371   0.54853  31.25871 1S   53     0.00000
   58    4 PHE  CE1    5.83513   1.02701  33.26894 1S   53     1.00000
   59    4 PHE  HE1    6.61298   1.76038  33.40774 1S   53     0.00000
   60    4 PHE  CZ     4.93373   0.74839  34.30370 1S   53     1.00000
   61    4 PHE  HZ     5.00806   1.24913  35.25111 1S   53     0.00000
   62    4 PHE  CD2    3.81798  -0.87329  32.90260 1S   53     1.00000
   63    4 PHE  HD2    3.03670  -1.60490  32.76451 1S   53     0.00000
   64    4 PHE  CE2    3.92510  -0.20010  34.12226 1S   53     1.00000
   65    4 PHE  HE2    3.23521  -0.41104  34.92556 1S   53     0.00000
   66    4 PHE  C      3.51472  -1.44789  28.33376 1S   53     1.00000
   67    4 PHE  O      2.44491  -2.00223  28.09135 1S   53     1.00000
   68    5 THR  N      4.58212  -1.59088  27.51921 1S   54     1.00000
   69    5 THR  HN     5.41092  -1.04701  27.64725 1S   54     0.00000
   70    5 THR  CA     4.60212  -2.50115  26.39913 1S   54     1.00000
   71    5 THR  HA     3.69355  -2.34878  25.83295 1S   54     0.00000
   72    5 THR  CB     5.80122  -2.29929  25.47892 1S   54     1.00000
   73    5 THR  HB     5.69911  -2.93367  24.56973 1S   54     0.00000
   74    5 THR  OG1    7.02706  -2.62632  26.12769 1S   54     1.00000
   75    5 THR  HG1    6.95134  -3.55699  26.36174 1S   54     0.00000
   76    5 THR  CG2    5.85897  -0.82332  25.04189 1S   54     1.00000
   77    5 THR  HG21   5.97897  -0.15749  25.91648 1S   54     0.00000
   78    5 THR  HG22   4.93122  -0.53244  24.50895 1S   54     0.00000
   79    5 THR  HG23   6.73003  -0.65429  24.37476 1S   54     0.00000
   80    5 THR  C      4.59039  -3.91346  26.92574 1S   54     1.00000
   81    5 THR  O      4.99416  -4.17642  28.05375 1S   54     1.00000
   82    6 ALA  N      4.10488  -4.86555  26.12250 1S   55     1.00000
   83    6 ALA  HN     3.77087  -4.67747  25.20379 1S   55     0.00000
   84    6 ALA  CA     3.99236  -6.21448  26.58750 1S   55     1.00000
   85    6 ALA  HA     3.77352  -6.22117  27.64736 1S   55     0.00000
   86    6 ALA  CB     2.86125  -6.94009  25.86577 1S   55     1.00000
   87    6 ALA  HB1    3.03285  -6.95363  24.76785 1S   55     0.00000
   88    6 ALA  HB2    1.89557  -6.42765  26.06140 1S   55     0.00000
   89    6 ALA  HB3    2.77918  -7.98334  26.23321 1S   55     0.00000
   90    6 ALA  C      5.27879  -6.95254  26.35938 1S   55     1.00000
   91    6 ALA  O      6.00329  -6.70100  25.39677 1S   55     1.00000
   92    7 LEU  N      5.58313  -7.90333  27.26626 1S   56     1.00000
   93    7 LEU  HN     5.03770  -8.03276  28.09259 1S   56     0.00000
   94    7 LEU  CA     6.67894  -8.81545  27.09088 1S   56     1.00000
   95    7 LEU  HA     7.49439  -8.30778  26.59609 1S   56     0.00000
   96    7 LEU  CB     7.15155  -9.40825  28.43054 1S   56     1.00000
   97    7 LEU  HB1    7.78436 -10.30202  28.24466 1S   56     0.00000
   98    7 LEU  HB2    6.26407  -9.72740  29.02030 1S   56     0.00000
   99    7 LEU  CG     7.98842  -8.43375  29.27727 1S   56     1.00000
  100    7 LEU  HG     7.39633  -7.50610  29.44806 1S   56     0.00000
  101    7 LEU  CD1    8.29774  -9.05701  30.64582 1S   56     1.00000
  102    7 LEU  HD11   8.87649  -9.99528  30.50868 1S   56     0.00000
  103    7 LEU  HD12   7.35303  -9.29195  31.17922 1S   56     0.00000
  104    7 LEU  HD13   8.89429  -8.35460  31.26456 1S   56     0.00000
  105    7 LEU  CD2    9.28498  -8.04483  28.54973 1S   56     1.00000
  106    7 LEU  HD21   9.05807  -7.39633  27.67804 1S   56     0.00000
  107    7 LEU  HD22   9.80866  -8.95635  28.19273 1S   56     0.00000
  108    7 LEU  HD23   9.96255  -7.48790  29.22877 1S   56     0.00000
  109    7 LEU  C      6.21923  -9.93669  26.20644 1S   56     1.00000
  110    7 LEU  O      5.40437 -10.76826  26.60039 1S   56     1.00000
  111    8 THR  N      6.74113  -9.96700  24.96139 1S   57     1.00000
  112    8 THR  HN     7.38199  -9.26846  24.65322 1S   57     0.00000
  113    8 THR  CA     6.36462 -10.94358  23.96801 1S   57     1.00000
  114    8 THR  HA     5.28448 -11.01780  23.96838 1S   57     0.00000
  115    8 THR  CB     6.84076 -10.55111  22.58005 1S   57     1.00000
  116    8 THR  HB     7.95329 -10.55416  22.53687 1S   57     0.00000
  117    8 THR  OG1    6.39206  -9.23756  22.26557 1S   57     1.00000
  118    8 THR  HG1    6.97664  -8.63372  22.73104 1S   57     0.00000
  119    8 THR  CG2    6.28239 -11.51991  21.52126 1S   57     1.00000
  120    8 THR  HG21   5.18364 -11.62979  21.63847 1S   57     0.00000
  121    8 THR  HG22   6.75568 -12.51885  21.62351 1S   57     0.00000
  122    8 THR  HG23   6.49729 -11.13643  20.50162 1S   57     0.00000
  123    8 THR  C      6.94134 -12.28387  24.34687 1S   57     1.00000
  124    8 THR  O      8.09937 -12.38946  24.74806 1S   57     1.00000
  125    9 GLN  N      6.10940 -13.34085  24.25416 1S   58     1.00000
  126    9 GLN  HN     5.16320 -13.24328  23.94806 1S   58     0.00000
  127    9 GLN  CA     6.49650 -14.66375  24.64657 1S   58     1.00000
  128    9 GLN  HA     7.28242 -14.61297  25.38718 1S   58     0.00000
  129    9 GLN  CB     5.30138 -15.41494  25.23847 1S   58     1.00000
  130    9 GLN  HB1    4.69581 -15.81244  24.40353 1S   58     0.00000
  131    9 GLN  HB2    4.65530 -14.69783  25.79524 1S   58     0.00000
  132    9 GLN  CG     5.71303 -16.51189  26.21500 1S   58     1.00000
  133    9 GLN  HG1    5.55853 -16.11877  27.24055 1S   58     0.00000
  134    9 GLN  HG2    6.78101 -16.79023  26.08719 1S   58     0.00000
  135    9 GLN  CD     4.83077 -17.74099  26.05691 1S   58     1.00000
  136    9 GLN  OE1    4.18735 -18.00264  25.03995 1S   58     1.00000
  137    9 GLN  NE2    4.85442 -18.57601  27.12083 1S   58     1.00000
  138    9 GLN  HE21   4.24130 -19.35989  27.14122 1S   58     0.00000
  139    9 GLN  HE22   5.67054 -18.58305  27.69628 1S   58     0.00000
  140    9 GLN  C      6.99510 -15.41074  23.43964 1S   58     1.00000
  141    9 GLN  O      6.25868 -15.62436  22.47493 1S   58     1.00000
  142   10 HSD  N      8.28483 -15.80885  23.47495 1S   59     1.00000
  143   10 HSD  HN     8.86410 -15.62619  24.26608 1S   59     0.00000
  144   10 HSD  CA     8.92111 -16.49184  22.37984 1S   59     1.00000
  145   10 HSD  HA     8.27211 -16.50851  21.51404 1S   59     0.00000
  146   10 HSD  CB    10.29570 -15.97229  21.99694 1S   59     1.00000
  147   10 HSD  HB1   10.72648 -16.55592  21.15638 1S   59     0.00000
  148   10 HSD  HB2   10.97697 -16.02159  22.87112 1S   59     0.00000
  149   10 HSD  ND1   11.15880 -13.63821  21.89710 1S   59     1.00000
  150   10 HSD  HD1   11.98768 -13.80361  22.43330 1S   59     0.00000
  151   10 HSD  CG    10.20157 -14.57252  21.59223 1S   59     1.00000
  152   10 HSD  CE1   10.70827 -12.46204  21.43753 1S   59     1.00000
  153   10 HSD  HE1   11.28826 -11.54089  21.49392 1S   59     0.00000
  154   10 HSD  NE2    9.53225 -12.59499  20.86847 1S   59     1.00000
  155   10 HSD  CD2    9.21471 -13.92064  20.94284 1S   59     1.00000
  156   10 HSD  HD2    8.29605 -14.26460  20.47927 1S   59     0.00000
  157   10 HSD  C      9.14776 -17.87318  22.77335 1S   59     1.00000
  158   10 HSD  O     10.03576 -18.21542  23.55433 1S   59     1.00000
  159   11 GLY  N      8.28127 -18.69837  22.19582 1S   60     1.00000
  160   11 GLY  HN     7.50103 -18.41028  21.65990 1S   60     0.00000
  161   11 GLY  CA     8.12049 -20.02155  22.55471 1S   60     1.00000
  162   11 GLY  HA1    8.93020 -20.24483  23.30558 1S   60     0.00000
  163   11 GLY  HA2    8.29390 -20.65440  21.70023 1S   60     0.00000
  164   11 GLY  C      6.46480 -20.13529  22.80543 1S   60     1.00000
  165   11 GLY  O      5.60587 -19.49258  22.32148 1S   60     1.00000
  166   12 LYS  N      5.99351 -20.83166  23.86693 1S   61     1.00000
  167   12 LYS  HN     7.03400 -20.77216  24.13966 1S   61     0.00000
  168   12 LYS  CA     5.24046 -22.08926  24.99920 1S   61     1.00000
  169   12 LYS  HA     4.27074 -21.89166  24.88520 1S   61     0.00000
  170   12 LYS  CB     5.42799 -23.67462  24.86003 1S   61     1.00000
  171   12 LYS  HB1    4.39746 -23.91641  24.54019 1S   61     0.00000
  172   12 LYS  HB2    5.54699 -24.26994  25.81111 1S   61     0.00000
  173   12 LYS  CG     6.36212 -24.40258  23.87081 1S   61     0.00000
  174   12 LYS  HG1    5.72005 -24.69591  22.99863 1S   61     0.00000
  175   12 LYS  HG2    6.84187 -25.28059  24.38884 1S   61     0.00000
  176   12 LYS  CD     7.53333 -23.60369  23.40757 1S   61     0.00000
  177   12 LYS  HD1    7.42600 -23.52414  22.25566 1S   61     0.00000
  178   12 LYS  HD2    8.51778 -24.12629  23.46730 1S   61     0.00000
  179   12 LYS  CE     7.91554 -22.33054  24.44034 1S   61     0.00000
  180   12 LYS  HE1    7.46277 -22.23611  23.48737 1S   61     0.00000
  181   12 LYS  HE2    8.80272 -21.90823  24.24736 1S   61     0.00000
  182   12 LYS  NZ     7.31004 -20.78417  25.64021 1S   61     0.00000
  183   12 LYS  HZ1    6.87757 -21.33816  26.43257 1S   61     0.00000
  184   12 LYS  HZ2    6.19102 -20.52021  25.41409 1S   61     0.00000
  185   12 LYS  HZ3    7.60586 -19.83951  25.44601 1S   61     0.00000
  186   12 LYS  C      5.46100 -22.18173  26.99529 1S   61     1.00000
  187   12 LYS  O      4.55985 -22.55892  27.74302 1S   61     1.00000
  188   13 GLU  N      6.69315 -22.27380  27.65627 1S   62     1.00000
  189   13 GLU  HN     7.49309 -22.61158  27.15864 1S   62     0.00000
  190   13 GLU  CA     7.10014 -21.72562  28.94837 1S   62     1.00000
  191   13 GLU  HA     6.55315 -22.28245  29.69513 1S   62     0.00000
  192   13 GLU  CB     8.62216 -21.87664  29.29957 1S   62     1.00000
  193   13 GLU  HB1    8.79711 -22.89383  29.70742 1S   62     0.00000
  194   13 GLU  HB2    8.86847 -21.17279  30.12994 1S   62     0.00000
  195   13 GLU  CG     9.67014 -21.60755  28.18554 1S   62     0.00000
  196   13 GLU  HG1   10.66304 -21.46584  28.67005 1S   62     0.00000
  197   13 GLU  HG2    9.43272 -20.67513  27.63491 1S   62     0.00000
  198   13 GLU  CD     9.82738 -22.76549  27.19383 1S   62     0.00000
  199   13 GLU  OE1   10.62039 -22.58905  26.22726 1S   62     0.00000
  200   13 GLU  OE2    9.16726 -23.81964  27.36662 1S   62     0.00000
  201   13 GLU  C      6.75469 -20.25454  29.12882 1S   62     1.00000
  202   13 GLU  O      7.25513 -19.35576  28.45390 1S   62     1.00000
  203   14 ASP  N      5.84734 -20.05558  30.09811 1S   63     1.00000
  204   14 ASP  HN     5.53183 -20.93045  30.44695 1S   63     0.00000
  205   14 ASP  CA     5.10883 -18.90051  30.46742 1S   63     1.00000
  206   14 ASP  HA     4.86329 -18.33541  29.58366 1S   63     0.00000
  207   14 ASP  CB     3.83353 -19.32313  31.21634 1S   63     1.00000
  208   14 ASP  HB1    3.43197 -18.47695  31.80783 1S   63     0.00000
  209   14 ASP  HB2    4.09312 -20.15875  31.90436 1S   63     0.00000
  210   14 ASP  CG     2.73648 -19.80321  30.26114 1S   63     1.00000
  211   14 ASP  OD1    2.85290 -19.61034  29.02244 1S   63     1.00000
  212   14 ASP  OD2    1.73308 -20.35563  30.78397 1S   63     1.00000
  213   14 ASP  C      5.96190 -18.01844  31.32647 1S   63     1.00000
  214   14 ASP  O      7.01597 -18.40695  31.83183 1S   63     1.00000
  215   15 LEU  N      5.51865 -16.76024  31.46076 1S   64     1.00000
  216   15 LEU  HN     4.65002 -16.47391  31.06431 1S   64     0.00000
  217   15 LEU  CA     6.28496 -15.74528  32.11907 1S   64     1.00000
  218   15 LEU  HA     7.32079 -15.86092  31.83260 1S   64     0.00000
  219   15 LEU  CB     5.77627 -14.35004  31.71208 1S   64     1.00000
  220   15 LEU  HB1    4.69144 -14.27202  31.94207 1S   64     0.00000
  221   15 LEU  HB2    5.87900 -14.25791  30.60928 1S   64     0.00000
  222   15 LEU  CG     6.51958 -13.16396  32.35252 1S   64     1.00000
  223   15 LEU  HG     6.38909 -13.21789  33.45753 1S   64     0.00000
  224   15 LEU  CD1    8.02730 -13.20535  32.05589 1S   64     1.00000
  225   15 LEU  HD11   8.19714 -13.33099  30.96925 1S   64     0.00000
  226   15 LEU  HD12   8.50737 -14.05237  32.58528 1S   64     0.00000
  227   15 LEU  HD13   8.51416 -12.26647  32.38540 1S   64     0.00000
  228   15 LEU  CD2    5.89412 -11.84204  31.89061 1S   64     1.00000
  229   15 LEU  HD21   4.82130 -11.80743  32.17587 1S   64     0.00000
  230   15 LEU  HD22   5.98268 -11.74353  30.78856 1S   64     0.00000
  231   15 LEU  HD23   6.41519 -10.98825  32.36686 1S   64     0.00000
  232   15 LEU  C      6.17816 -15.91664  33.60323 1S   64     1.00000
  233   15 LEU  O      5.11022 -16.22993  34.12046 1S   64     1.00000
  234   16 LYS  N      7.30873 -15.73071  34.31533 1S   65     1.00000
  235   16 LYS  HN     8.18178 -15.53421  33.87645 1S   65     0.00000
  236   16 LYS  CA     7.31462 -15.76230  35.74725 1S   65     1.00000
  237   16 LYS  HA     6.43745 -15.24561  36.10916 1S   65     0.00000
  238   16 LYS  CB     7.33060 -17.20341  36.30364 1S   65     1.00000
  239   16 LYS  HB1    6.72392 -17.84959  35.62759 1S   65     0.00000
  240   16 LYS  HB2    6.83386 -17.20615  37.29747 1S   65     0.00000
  241   16 LYS  CG     8.71894 -17.83603  36.43869 1S   65     1.00000
  242   16 LYS  HG1    9.43682 -17.13051  36.91209 1S   65     0.00000
  243   16 LYS  HG2    9.10630 -18.09353  35.42956 1S   65     0.00000
  244   16 LYS  CD     8.70704 -19.05820  37.35180 1S   65     1.00000
  245   16 LYS  HD1    8.13311 -19.87506  36.86610 1S   65     0.00000
  246   16 LYS  HD2    8.18552 -18.78460  38.29923 1S   65     0.00000
  247   16 LYS  CE    10.12663 -19.50903  37.69369 1S   65     1.00000
  248   16 LYS  HE1   10.09879 -20.41949  38.32515 1S   65     0.00000
  249   16 LYS  HE2   10.66643 -18.69650  38.22820 1S   65     0.00000
  250   16 LYS  NZ    10.88464 -19.81713  36.45888 1S   65     1.00000
  251   16 LYS  HZ1   10.93423 -18.96518  35.86266 1S   65     0.00000
  252   16 LYS  HZ2   10.39767 -20.57176  35.93486 1S   65     0.00000
  253   16 LYS  HZ3   11.84605 -20.12315  36.70680 1S   65     0.00000
  254   16 LYS  C      8.51950 -15.00014  36.21564 1S   65     1.00000
  255   16 LYS  O      9.50134 -14.85784  35.48542 1S   65     1.00000
  256   17 PHE  N      8.47590 -14.51455  37.47468 1S   66     1.00000
  257   17 PHE  HN     7.67832 -14.63955  38.05997 1S   66     0.00000
  258   17 PHE  CA     9.58005 -13.79033  38.05055 1S   66     1.00000
  259   17 PHE  HA    10.46260 -13.97068  37.46226 1S   66     0.00000
  260   17 PHE  CB     9.30147 -12.27739  38.14609 1S   66     1.00000
  261   17 PHE  HB1   10.05017 -11.77211  38.79205 1S   66     0.00000
  262   17 PHE  HB2    8.29040 -12.11065  38.56774 1S   66     0.00000
  263   17 PHE  CG     9.36369 -11.63057  36.79601 1S   66     1.00000
  264   17 PHE  CD1   10.58042 -11.12122  36.31390 1S   66     1.00000
  265   17 PHE  HD1   11.47708 -11.21034  36.91026 1S   66     0.00000
  266   17 PHE  CE1   10.62966 -10.46998  35.07720 1S   66     1.00000
  267   17 PHE  HE1   11.56002 -10.07135  34.71454 1S   66     0.00000
  268   17 PHE  CZ     9.47196 -10.32531  34.30707 1S   66     1.00000
  269   17 PHE  HZ     9.51827  -9.82943  33.34890 1S   66     0.00000
  270   17 PHE  CD2    8.20375 -11.48004  36.01798 1S   66     1.00000
  271   17 PHE  HD2    7.26061 -11.86103  36.37959 1S   66     0.00000
  272   17 PHE  CE2    8.25719 -10.82720  34.78335 1S   66     1.00000
  273   17 PHE  HE2    7.35931 -10.71239  34.20057 1S   66     0.00000
  274   17 PHE  C      9.80874 -14.28877  39.45475 1S   66     1.00000
  275   17 PHE  O      8.85635 -14.71101  40.11304 1S   66     1.00000
  276   18 PRO  N     11.03827 -14.22998  39.97889 1S   67     1.00000
  277   18 PRO  CD    12.27344 -14.05581  39.20736 1S   67     1.00000
  278   18 PRO  HD1   12.46816 -12.96967  39.07314 1S   67     0.00000
  279   18 PRO  HD2   12.22492 -14.56451  38.21975 1S   67     0.00000
  280   18 PRO  CA    11.31164 -14.51800  41.37672 1S   67     1.00000
  281   18 PRO  HA    10.88213 -15.47593  41.63353 1S   67     0.00000
  282   18 PRO  CB    12.84844 -14.49092  41.49133 1S   67     1.00000
  283   18 PRO  HB1   13.21920 -15.29238  42.16301 1S   67     0.00000
  284   18 PRO  HB2   13.21595 -13.50669  41.85786 1S   67     0.00000
  285   18 PRO  CG    13.35810 -14.69863  40.06353 1S   67     1.00000
  286   18 PRO  HG1   14.35103 -14.23390  39.90145 1S   67     0.00000
  287   18 PRO  HG2   13.40801 -15.78650  39.83752 1S   67     0.00000
  288   18 PRO  C     10.70869 -13.46381  42.26596 1S   67     1.00000
  289   18 PRO  O     10.19093 -12.45765  41.78175 1S   67     1.00000
  290   19 ARG  N     10.78285 -13.67771  43.58926 1S   68     1.00000
  291   19 ARG  HN    11.20262 -14.50197  43.96113 1S   68     0.00000
  292   19 ARG  CA    10.24462 -12.74930  44.54265 1S   68     1.00000
  293   19 ARG  HA     9.23934 -12.49005  44.23766 1S   68     0.00000
  294   19 ARG  CB    10.19779 -13.39058  45.93599 1S   68     1.00000
  295   19 ARG  HB1   11.22488 -13.68435  46.24758 1S   68     0.00000
  296   19 ARG  HB2    9.59496 -14.32277  45.84983 1S   68     0.00000
  297   19 ARG  CG     9.58224 -12.49443  47.01765 1S   68     1.00000
  298   19 ARG  HG1    8.54650 -12.21719  46.72151 1S   68     0.00000
  299   19 ARG  HG2   10.17757 -11.55719  47.09989 1S   68     0.00000
  300   19 ARG  CD     9.57207 -13.15756  48.39364 1S   68     1.00000
  301   19 ARG  HD1    9.02342 -12.52314  49.12217 1S   68     0.00000
  302   19 ARG  HD2   10.61298 -13.33948  48.74087 1S   68     0.00000
  303   19 ARG  NE     8.87678 -14.47584  48.28016 1S   68     1.00000
  304   19 ARG  HE     8.62237 -14.81565  47.37583 1S   68     0.00000
  305   19 ARG  CZ     8.62298 -15.25078  49.36799 1S   68     1.00000
  306   19 ARG  NH1    8.00933 -16.44988  49.20228 1S   68     1.00000
  307   19 ARG  HH11   7.75469 -16.75003  48.28486 1S   68     0.00000
  308   19 ARG  HH12   7.81135 -17.01692  49.99857 1S   68     0.00000
  309   19 ARG  NH2    8.97339 -14.83548  50.61211 1S   68     1.00000
  310   19 ARG  HH21   9.42424 -13.95130  50.72216 1S   68     0.00000
  311   19 ARG  HH22   8.77143 -15.40722  51.40348 1S   68     0.00000
  312   19 ARG  C     11.08786 -11.49988  44.58656 1S   68     1.00000
  313   19 ARG  O     12.30543 -11.56548  44.74878 1S   68     1.00000
  314   20 GLY  N     10.43421 -10.32763  44.41328 1S   69     1.00000
  315   20 GLY  HN     9.44570 -10.30433  44.27736 1S   69     0.00000
  316   20 GLY  CA    11.09599  -9.04447  44.46814 1S   69     1.00000
  317   20 GLY  HA1   12.07136  -9.15294  44.91905 1S   69     0.00000
  318   20 GLY  HA2   10.45022  -8.39022  45.03372 1S   69     0.00000
  319   20 GLY  C     11.26719  -8.43886  43.10501 1S   69     1.00000
  320   20 GLY  O     11.35537  -7.21850  42.98412 1S   69     1.00000
  321   21 GLN  N     11.34338  -9.27124  42.04189 1S   70     1.00000
  322   21 GLN  HN    11.28067 -10.26152  42.14970 1S   70     0.00000
  323   21 GLN  CA    11.57433  -8.79896  40.69609 1S   70     1.00000
  324   21 GLN  HA    11.85395  -7.75497  40.70903 1S   70     0.00000
  325   21 GLN  CB    12.69394  -9.60024  39.99315 1S   70     1.00000
  326   21 GLN  HB1   12.89196  -9.15120  38.99591 1S   70     0.00000
  327   21 GLN  HB2   12.35606 -10.65093  39.84871 1S   70     0.00000
  328   21 GLN  CG    14.00768  -9.60346  40.79643 1S   70     1.00000
  329   21 GLN  HG1   13.82009  -9.96569  41.83012 1S   70     0.00000
  330   21 GLN  HG2   14.41484  -8.57090  40.84707 1S   70     0.00000
  331   21 GLN  CD    15.03930 -10.52848  40.14450 1S   70     1.00000
  332   21 GLN  OE1   14.76660 -11.22720  39.16292 1S   70     1.00000
  333   21 GLN  NE2   16.27071 -10.52750  40.73311 1S   70     1.00000
  334   21 GLN  HE21  16.99284 -11.11092  40.36538 1S   70     0.00000
  335   21 GLN  HE22  16.44031  -9.94509  41.52739 1S   70     0.00000
  336   21 GLN  C     10.30647  -8.93036  39.89870 1S   70     1.00000
  337   21 GLN  O      9.43123  -9.72887  40.23020 1S   70     1.00000
  338   22 GLY  N     10.19273  -8.13059  38.81048 1S   71     1.00000
  339   22 GLY  HN    10.88508  -7.44412  38.60370 1S   71     0.00000
  340   22 GLY  CA     9.14480  -8.29639  37.82881 1S   71     1.00000
  341   22 GLY  HA1    8.44805  -9.04597  38.16497 1S   71     0.00000
  342   22 GLY  HA2    9.62386  -8.56782  36.90190 1S   71     0.00000
  343   22 GLY  C      8.36465  -7.05224  37.56737 1S   71     1.00000
  344   22 GLY  O      7.68071  -6.96575  36.54941 1S   71     1.00000
  345   23 VAL  N      8.41712  -6.05246  38.47387 1S   72     1.00000
  346   23 VAL  HN     8.98305  -6.10214  39.29250 1S   72     0.00000
  347   23 VAL  CA     7.59626  -4.87209  38.34239 1S   72     1.00000
  348   23 VAL  HA     6.64042  -5.18342  37.95791 1S   72     0.00000
  349   23 VAL  CB     7.32997  -4.18161  39.66724 1S   72     1.00000
  350   23 VAL  HB     8.27977  -3.78809  40.09478 1S   72     0.00000
  351   23 VAL  CG1    6.33860  -3.01974  39.46136 1S   72     1.00000
  352   23 VAL  HG11   5.45182  -3.35673  38.88753 1S   72     0.00000
  353   23 VAL  HG12   6.82575  -2.18204  38.92119 1S   72     0.00000
  354   23 VAL  HG13   5.98722  -2.64902  40.44454 1S   72     0.00000
  355   23 VAL  CG2    6.75182  -5.20703  40.65908 1S   72     1.00000
  356   23 VAL  HG21   7.46316  -6.03856  40.84110 1S   72     0.00000
  357   23 VAL  HG22   5.79645  -5.61751  40.27538 1S   72     0.00000
  358   23 VAL  HG23   6.55365  -4.70987  41.63135 1S   72     0.00000
  359   23 VAL  C      8.28537  -3.91712  37.39285 1S   72     1.00000
  360   23 VAL  O      9.46515  -3.63005  37.60591 1S   72     1.00000
  361   24 PRO  N      7.63585  -3.39837  36.34467 1S   73     1.00000
  362   24 PRO  CD     6.29648  -3.78410  35.89516 1S   73     1.00000
  363   24 PRO  HD1    5.55078  -3.15730  36.43022 1S   73     0.00000
  364   24 PRO  HD2    6.08295  -4.86235  36.05756 1S   73     0.00000
  365   24 PRO  CA     8.27283  -2.49512  35.40669 1S   73     1.00000
  366   24 PRO  HA     9.18059  -2.94697  35.04025 1S   73     0.00000
  367   24 PRO  CB     7.23319  -2.27786  34.29841 1S   73     1.00000
  368   24 PRO  HB1    7.70546  -2.22280  33.29778 1S   73     0.00000
  369   24 PRO  HB2    6.64611  -1.35327  34.47725 1S   73     0.00000
  370   24 PRO  CG     6.28719  -3.47319  34.40520 1S   73     1.00000
  371   24 PRO  HG1    5.27112  -3.24599  34.02711 1S   73     0.00000
  372   24 PRO  HG2    6.71192  -4.33551  33.84837 1S   73     0.00000
  373   24 PRO  C      8.61554  -1.19242  36.07268 1S   73     1.00000
  374   24 PRO  O      7.95846  -0.79716  37.03547 1S   73     1.00000
  375   25 ILE  N      9.66075  -0.52069  35.56491 1S   74     1.00000
  376   25 ILE  HN    10.18100  -0.89668  34.79646 1S   74     0.00000
  377   25 ILE  CA    10.16171   0.71247  36.09959 1S   74     1.00000
  378   25 ILE  HA    10.22920   0.60977  37.17316 1S   74     0.00000
  379   25 ILE  CB    11.53801   1.05205  35.53682 1S   74     1.00000
  380   25 ILE  HB    11.49666   0.99713  34.42447 1S   74     0.00000
  381   25 ILE  CG2   11.95532   2.48131  35.93820 1S   74     1.00000
  382   25 ILE  HG21  11.99646   2.55850  37.04505 1S   74     0.00000
  383   25 ILE  HG22  11.24391   3.23418  35.54353 1S   74     0.00000
  384   25 ILE  HG23  12.95261   2.72646  35.52123 1S   74     0.00000
  385   25 ILE  CG1   12.58098   0.02078  36.02950 1S   74     1.00000
  386   25 ILE  HG11  12.26374  -1.00073  35.73562 1S   74     0.00000
  387   25 ILE  HG12  12.62231   0.04805  37.13929 1S   74     0.00000
  388   25 ILE  CD    13.98316   0.26777  35.46929 1S   74     1.00000
  389   25 ILE  HD1   14.42782   1.18230  35.91437 1S   74     0.00000
  390   25 ILE  HD2   13.93708   0.39977  34.36935 1S   74     0.00000
  391   25 ILE  HD3   14.64694  -0.58982  35.69975 1S   74     0.00000
  392   25 ILE  C      9.16840   1.79250  35.77388 1S   74     1.00000
  393   25 ILE  O      8.71345   1.91168  34.63861 1S   74     1.00000
  394   26 ASN  N      8.80622   2.59800  36.79230 1S   75     1.00000
  395   26 ASN  HN     9.14285   2.45715  37.72043 1S   75     0.00000
  396   26 ASN  CA     7.94223   3.72240  36.58802 1S   75     1.00000
  397   26 ASN  HA     8.06609   4.09385  35.57924 1S   75     0.00000
  398   26 ASN  CB     6.46570   3.34262  36.82651 1S   75     1.00000
  399   26 ASN  HB1    6.32570   2.97121  37.85924 1S   75     0.00000
  400   26 ASN  HB2    6.22508   2.50678  36.14433 1S   75     0.00000
  401   26 ASN  CG     5.50342   4.49640  36.52413 1S   75     1.00000
  402   26 ASN  OD1    5.88108   5.52217  35.94926 1S   75     1.00000
  403   26 ASN  ND2    4.21799   4.30915  36.93476 1S   75     1.00000
  404   26 ASN  HD21   3.56155   5.05536  36.83769 1S   75     0.00000
  405   26 ASN  HD22   3.97947   3.47851  37.43945 1S   75     0.00000
  406   26 ASN  C      8.39562   4.78536  37.54472 1S   75     1.00000
  407   26 ASN  O      8.13412   4.73581  38.74053 1S   75     1.00000
  408   27 THR  N      9.08130   5.81817  37.02586 1S   76     1.00000
  409   27 THR  HN     9.35412   5.82954  36.06701 1S   76     0.00000
  410   27 THR  CA     9.52665   6.94905  37.81191 1S   76     1.00000
  411   27 THR  HA    10.05930   6.55737  38.66883 1S   76     0.00000
  412   27 THR  CB    10.46250   7.84863  37.01667 1S   76     1.00000
  413   27 THR  HB    10.81678   8.69178  37.65140 1S   76     0.00000
  414   27 THR  OG1    9.82561   8.38158  35.85893 1S   76     1.00000
  415   27 THR  HG1    9.37418   9.17725  36.15129 1S   76     0.00000
  416   27 THR  CG2   11.68810   7.03128  36.56035 1S   76     1.00000
  417   27 THR  HG21  11.38960   6.18428  35.90777 1S   76     0.00000
  418   27 THR  HG22  12.23751   6.62996  37.43711 1S   76     0.00000
  419   27 THR  HG23  12.37673   7.68230  35.98031 1S   76     0.00000
  420   27 THR  C      8.36954   7.76810  38.35696 1S   76     1.00000
  421   27 THR  O      8.51898   8.45816  39.36221 1S   76     1.00000
  422   28 ASN  N      7.17944   7.68677  37.71522 1S   77     1.00000
  423   28 ASN  HN     7.07949   7.13420  36.88816 1S   77     0.00000
  424   28 ASN  CA     5.99301   8.38742  38.14781 1S   77     1.00000
  425   28 ASN  HA     6.30170   9.25162  38.71891 1S   77     0.00000
  426   28 ASN  CB     5.17590   8.82912  36.90672 1S   77     1.00000
  427   28 ASN  HB1    4.61244   7.96833  36.48743 1S   77     0.00000
  428   28 ASN  HB2    5.88277   9.18530  36.12589 1S   77     0.00000
  429   28 ASN  CG     4.22363   9.98418  37.23862 1S   77     1.00000
  430   28 ASN  OD1    4.40457  10.71937  38.21455 1S   77     1.00000
  431   28 ASN  ND2    3.17597  10.13780  36.38009 1S   77     1.00000
  432   28 ASN  HD21   2.51445  10.86674  36.54566 1S   77     0.00000
  433   28 ASN  HD22   3.07624   9.51362  35.60654 1S   77     0.00000
  434   28 ASN  C      5.13857   7.50491  39.04405 1S   77     1.00000
  435   28 ASN  O      3.91616   7.45427  38.90450 1S   77     1.00000
  436   29 SER  N      5.76530   6.78992  40.00480 1S   78     1.00000
  437   29 SER  HN     6.75364   6.84312  40.13352 1S   78     0.00000
  438   29 SER  CA     5.04320   5.91170  40.89564 1S   78     1.00000
  439   29 SER  HA     4.07617   6.34562  41.10745 1S   78     0.00000
  440   29 SER  CB     4.83787   4.49517  40.31657 1S   78     1.00000
  441   29 SER  HB1    4.31541   4.59185  39.34743 1S   78     0.00000
  442   29 SER  HB2    4.21457   3.86870  40.98375 1S   78     0.00000
  443   29 SER  OG     6.07014   3.82134  40.11885 1S   78     1.00000
  444   29 SER  HG1    6.66842   4.47277  39.72541 1S   78     0.00000
  445   29 SER  C      5.79197   5.80482  42.18842 1S   78     1.00000
  446   29 SER  O      7.01006   5.97211  42.23483 1S   78     1.00000
  447   30 SER  N      5.05495   5.50351  43.27658 1S   79     1.00000
  448   30 SER  HN     4.07052   5.35016  43.21601 1S   79     0.00000
  449   30 SER  CA     5.62579   5.41264  44.59576 1S   79     1.00000
  450   30 SER  HA     6.49346   6.05115  44.62349 1S   79     0.00000
  451   30 SER  CB     4.63497   5.89620  45.67415 1S   79     1.00000
  452   30 SER  HB1    4.29867   6.92255  45.40887 1S   79     0.00000
  453   30 SER  HB2    5.10843   5.91782  46.67305 1S   79     0.00000
  454   30 SER  OG     3.49010   5.06991  45.76783 1S   79     1.00000
  455   30 SER  HG1    3.77735   4.20803  46.07456 1S   79     0.00000
  456   30 SER  C      6.03230   3.98930  44.89748 1S   79     1.00000
  457   30 SER  O      5.51679   3.07806  44.25405 1S   79     1.00000
  458   31 PRO  N      6.89278   3.73104  45.88437 1S   80     1.00000
  459   31 PRO  CD     7.73277   4.74633  46.53145 1S   80     1.00000
  460   31 PRO  HD1    7.16808   5.18777  47.38037 1S   80     0.00000
  461   31 PRO  HD2    8.05546   5.54768  45.83040 1S   80     0.00000
  462   31 PRO  CA     7.32642   2.37850  46.21407 1S   80     1.00000
  463   31 PRO  HA     7.69816   1.91132  45.31368 1S   80     0.00000
  464   31 PRO  CB     8.39800   2.57667  47.29598 1S   80     1.00000
  465   31 PRO  HB1    9.19675   1.81210  47.22362 1S   80     0.00000
  466   31 PRO  HB2    7.95080   2.55357  48.31558 1S   80     0.00000
  467   31 PRO  CG     8.94832   3.98215  47.04310 1S   80     1.00000
  468   31 PRO  HG1    9.37441   4.43735  47.95937 1S   80     0.00000
  469   31 PRO  HG2    9.72025   3.94318  46.24389 1S   80     0.00000
  470   31 PRO  C      6.21172   1.51723  46.74415 1S   80     1.00000
  471   31 PRO  O      6.29347   0.29633  46.62398 1S   80     1.00000
  472   32 ASP  N      5.14723   2.12639  47.30704 1S   81     1.00000
  473   32 ASP  HN     5.12185   3.11221  47.45441 1S   81     0.00000
  474   32 ASP  CA     4.01536   1.39195  47.80939 1S   81     1.00000
  475   32 ASP  HA     4.37734   0.55536  48.39037 1S   81     0.00000
  476   32 ASP  CB     3.10480   2.28186  48.68451 1S   81     1.00000
  477   32 ASP  HB1    2.22379   1.70010  49.02570 1S   81     0.00000
  478   32 ASP  HB2    2.75122   3.15732  48.09987 1S   81     0.00000
  479   32 ASP  CG     3.86096   2.78172  49.91800 1S   81     1.00000
  480   32 ASP  OD1    4.79231   2.07575  50.38641 1S   81     1.00000
  481   32 ASP  OD2    3.50339   3.88520  50.40916 1S   81     1.00000
  482   32 ASP  C      3.19573   0.81341  46.68919 1S   81     1.00000
  483   32 ASP  O      2.42757  -0.11417  46.91953 1S   81     1.00000
  484   33 ASP  N      3.36613   1.32050  45.44778 1S   82     1.00000
  485   33 ASP  HN     4.04865   2.02316  45.25590 1S   82     0.00000
  486   33 ASP  CA     2.56244   0.93058  44.32321 1S   82     1.00000
  487   33 ASP  HA     1.62165   0.58503  44.67936 1S   82     0.00000
  488   33 ASP  CB     2.28449   2.08925  43.36431 1S   82     1.00000
  489   33 ASP  HB1    1.59607   1.77743  42.54940 1S   82     0.00000
  490   33 ASP  HB2    3.24041   2.44616  42.91862 1S   82     0.00000
  491   33 ASP  CG     1.63763   3.25336  44.08800 1S   82     1.00000
  492   33 ASP  OD1    0.79727   3.07886  45.00855 1S   82     1.00000
  493   33 ASP  OD2    1.99297   4.38306  43.66774 1S   82     1.00000
  494   33 ASP  C      3.16952  -0.16965  43.51388 1S   82     1.00000
  495   33 ASP  O      2.53305  -0.64200  42.57741 1S   82     1.00000
  496   34 GLN  N      4.40221  -0.60777  43.84314 1S   83     1.00000
  497   34 GLN  HN     4.87655  -0.24996  44.64502 1S   83     0.00000
  498   34 GLN  CA     5.16560  -1.52243  43.02809 1S   83     1.00000
  499   34 GLN  HA     5.00025  -1.27600  41.98890 1S   83     0.00000
  500   34 GLN  CB     6.66916  -1.35750  43.34092 1S   83     1.00000
  501   34 GLN  HB1    7.09304  -2.32127  43.65678 1S   83     0.00000
  502   34 GLN  HB2    6.79092  -0.66471  44.20170 1S   83     0.00000
  503   34 GLN  CG     7.54010  -0.86244  42.17331 1S   83     1.00000
  504   34 GLN  HG1    7.55558  -1.63616  41.38183 1S   83     0.00000
  505   34 GLN  HG2    8.58149  -0.71553  42.52902 1S   83     0.00000
  506   34 GLN  CD     7.01473   0.45886  41.61369 1S   83     1.00000
  507   34 GLN  OE1    6.66435   1.37314  42.36307 1S   83     1.00000
  508   34 GLN  NE2    6.97006   0.55552  40.25366 1S   83     1.00000
  509   34 GLN  HE21   6.65749   1.41050  39.84151 1S   83     0.00000
  510   34 GLN  HE22   7.28686  -0.20856  39.69220 1S   83     0.00000
  511   34 GLN  C      4.69975  -2.95068  43.22905 1S   83     1.00000
  512   34 GLN  O      5.35902  -3.77886  43.85357 1S   83     1.00000
  513   35 ILE  N      3.51066  -3.26154  42.68334 1S   84     1.00000
  514   35 ILE  HN     2.98159  -2.56693  42.19732 1S   84     0.00000
  515   35 ILE  CA     2.87377  -4.53096  42.87552 1S   84     1.00000
  516   35 ILE  HA     3.59647  -5.29449  42.62980 1S   84     0.00000
  517   35 ILE  CB     2.36452  -4.73323  44.30283 1S   84     1.00000
  518   35 ILE  HB     3.24371  -4.67755  44.98841 1S   84     0.00000
  519   35 ILE  CG2    1.38926  -3.61267  44.71167 1S   84     1.00000
  520   35 ILE  HG21   0.42840  -3.73194  44.17099 1S   84     0.00000
  521   35 ILE  HG22   1.80795  -2.61112  44.49327 1S   84     0.00000
  522   35 ILE  HG23   1.18393  -3.66553  45.79977 1S   84     0.00000
  523   35 ILE  CG1    1.73759  -6.12477  44.49073 1S   84     1.00000
  524   35 ILE  HG11   2.49208  -6.88896  44.21393 1S   84     0.00000
  525   35 ILE  HG12   0.87179  -6.23483  43.80307 1S   84     0.00000
  526   35 ILE  CD     1.25916  -6.37165  45.91920 1S   84     1.00000
  527   35 ILE  HD1    0.37440  -5.73880  46.14148 1S   84     0.00000
  528   35 ILE  HD2    2.06063  -6.12678  46.64692 1S   84     0.00000
  529   35 ILE  HD3    0.96756  -7.43388  46.04314 1S   84     0.00000
  530   35 ILE  C      1.76242  -4.61798  41.86494 1S   84     1.00000
  531   35 ILE  O      1.05235  -3.64640  41.60718 1S   84     1.00000
  532   36 GLY  N      1.60177  -5.80495  41.24197 1S   85     1.00000
  533   36 GLY  HN     2.15503  -6.60374  41.47516 1S   85     0.00000
  534   36 GLY  CA     0.61205  -5.97621  40.21530 1S   85     1.00000
  535   36 GLY  HA1    0.77429  -5.22206  39.45982 1S   85     0.00000
  536   36 GLY  HA2   -0.36099  -5.93245  40.67926 1S   85     0.00000
  537   36 GLY  C      0.75775  -7.31864  39.58644 1S   85     1.00000
  538   36 GLY  O      1.28388  -8.25120  40.19007 1S   85     1.00000
  539   37 TYR  N      0.25817  -7.44557  38.34056 1S   86     1.00000
  540   37 TYR  HN    -0.11762  -6.65904  37.84745 1S   86     0.00000
  541   37 TYR  CA     0.14695  -8.71764  37.67943 1S   86     1.00000
  542   37 TYR  HA     0.93981  -9.35673  38.03604 1S   86     0.00000
  543   37 TYR  CB    -1.22147  -9.40523  37.93961 1S   86     1.00000
  544   37 TYR  HB1   -1.35059  -9.51263  39.02768 1S   86     0.00000
  545   37 TYR  HB2   -1.24177 -10.41924  37.49283 1S   86     0.00000
  546   37 TYR  CG    -2.41005  -8.64213  37.42742 1S   86     1.00000
  547   37 TYR  CD1   -2.89608  -8.91539  36.13856 1S   86     1.00000
  548   37 TYR  HD1   -2.41413  -9.66028  35.52451 1S   86     0.00000
  549   37 TYR  CE1   -3.99661  -8.22655  35.63609 1S   86     1.00000
  550   37 TYR  HE1   -4.36518  -8.43144  34.64147 1S   86     0.00000
  551   37 TYR  CZ    -4.61730  -7.26066  36.42379 1S   86     1.00000
  552   37 TYR  OH    -5.69024  -6.56553  35.86766 1S   86     1.00000
  553   37 TYR  HH    -5.92760  -5.86887  36.49317 1S   86     0.00000
  554   37 TYR  CD2   -3.05298  -7.66978  38.21478 1S   86     1.00000
  555   37 TYR  HD2   -2.68990  -7.44973  39.20675 1S   86     0.00000
  556   37 TYR  CE2   -4.15984  -6.97618  37.71579 1S   86     1.00000
  557   37 TYR  HE2   -4.64805  -6.22651  38.32236 1S   86     0.00000
  558   37 TYR  C      0.35405  -8.55980  36.20588 1S   86     1.00000
  559   37 TYR  O      0.25006  -7.46396  35.67403 1S   86     1.00000
  560   38 TYR  N      0.62885  -9.68273  35.51331 1S   87     1.00000
  561   38 TYR  HN     0.76188 -10.54821  35.99112 1S   87     0.00000
  562   38 TYR  CA     0.71468  -9.73668  34.07421 1S   87     1.00000
  563   38 TYR  HA     0.60616  -8.75006  33.65421 1S   87     0.00000
  564   38 TYR  CB     2.03037 -10.38020  33.59473 1S   87     1.00000
  565   38 TYR  HB1    1.95425 -10.69828  32.53641 1S   87     0.00000
  566   38 TYR  HB2    2.25260 -11.26433  34.21687 1S   87     0.00000
  567   38 TYR  CG     3.19650  -9.44661  33.69087 1S   87     1.00000
  568   38 TYR  CD1    3.52158  -8.63489  32.59495 1S   87     1.00000
  569   38 TYR  HD1    2.90597  -8.64929  31.70866 1S   87     0.00000
  570   38 TYR  CE1    4.64996  -7.81426  32.63095 1S   87     1.00000
  571   38 TYR  HE1    4.85958  -7.18290  31.78385 1S   87     0.00000
  572   38 TYR  CZ     5.44932  -7.76916  33.77942 1S   87     1.00000
  573   38 TYR  OH     6.56065  -6.90754  33.83909 1S   87     1.00000
  574   38 TYR  HH     6.96057  -7.00334  34.70897 1S   87     0.00000
  575   38 TYR  CD2    4.01810  -9.41659  34.83137 1S   87     1.00000
  576   38 TYR  HD2    3.79050 -10.04830  35.67645 1S   87     0.00000
  577   38 TYR  CE2    5.13897  -8.57892  34.87771 1S   87     1.00000
  578   38 TYR  HE2    5.75183  -8.55153  35.76577 1S   87     0.00000
  579   38 TYR  C     -0.41304 -10.59791  33.56085 1S   87     1.00000
  580   38 TYR  O     -0.67546 -11.67042  34.09964 1S   87     1.00000
  581   39 ARG  N     -1.10036 -10.13804  32.48973 1S   88     1.00000
  582   39 ARG  HN    -0.87828  -9.25050  32.08311 1S   88     0.00000
  583   39 ARG  CA    -2.20055 -10.84228  31.87616 1S   88     1.00000
  584   39 ARG  HA    -2.44192 -11.72133  32.45067 1S   88     0.00000
  585   39 ARG  CB    -3.45366  -9.95755  31.77668 1S   88     1.00000
  586   39 ARG  HB1   -3.23107  -9.08762  31.12699 1S   88     0.00000
  587   39 ARG  HB2   -3.68952  -9.57240  32.79396 1S   88     0.00000
  588   39 ARG  CG    -4.70326 -10.66160  31.22975 1S   88     1.00000
  589   39 ARG  HG1   -4.90519 -11.56256  31.84921 1S   88     0.00000
  590   39 ARG  HG2   -4.50831 -10.99344  30.18542 1S   88     0.00000
  591   39 ARG  CD    -5.90610  -9.71173  31.25023 1S   88     1.00000
  592   39 ARG  HD1   -5.72608  -8.84931  30.57495 1S   88     0.00000
  593   39 ARG  HD2   -6.07375  -9.34016  32.28308 1S   88     0.00000
  594   39 ARG  NE    -7.15304 -10.42562  30.83484 1S   88     1.00000
  595   39 ARG  HE    -7.66822 -10.92379  31.53422 1S   88     0.00000
  596   39 ARG  CZ    -7.58055 -10.50505  29.54505 1S   88     1.00000
  597   39 ARG  NH1   -6.99476  -9.84018  28.52046 1S   88     1.00000
  598   39 ARG  HH11  -6.39730 -10.41262  27.93164 1S   88     0.00000
  599   39 ARG  HH12  -6.69916  -8.89703  28.61993 1S   88     0.00000
  600   39 ARG  NH2   -8.66547 -11.26106  29.24475 1S   88     1.00000
  601   39 ARG  HH21  -9.25772 -11.57954  29.97940 1S   88     0.00000
  602   39 ARG  HH22  -8.91084 -11.36165  28.28195 1S   88     0.00000
  603   39 ARG  C     -1.80623 -11.27104  30.49359 1S   88     1.00000
  604   39 ARG  O     -1.25887 -10.48968  29.72037 1S   88     1.00000
  605   40 ARG  N     -2.09413 -12.54391  30.15093 1S   89     1.00000
  606   40 ARG  HN    -2.57560 -13.15039  30.78140 1S   89     0.00000
  607   40 ARG  CA    -1.71906 -13.12454  28.88788 1S   89     1.00000
  608   40 ARG  HA    -0.83192 -12.64130  28.50885 1S   89     0.00000
  609   40 ARG  CB    -1.46138 -14.63210  29.03675 1S   89     1.00000
  610   40 ARG  HB1   -2.36365 -15.11251  29.47671 1S   89     0.00000
  611   40 ARG  HB2   -0.63395 -14.76058  29.76204 1S   89     0.00000
  612   40 ARG  CG    -1.07805 -15.35052  27.73260 1S   89     1.00000
  613   40 ARG  HG1   -0.19285 -14.84084  27.29016 1S   89     0.00000
  614   40 ARG  HG2   -1.91662 -15.28026  27.00544 1S   89     0.00000
  615   40 ARG  CD    -0.73063 -16.82543  27.93955 1S   89     1.00000
  616   40 ARG  HD1    0.18543 -16.91374  28.55556 1S   89     0.00000
  617   40 ARG  HD2   -0.58714 -17.34271  26.96913 1S   89     0.00000
  618   40 ARG  NE    -1.84781 -17.49880  28.66347 1S   89     1.00000
  619   40 ARG  HE    -2.71422 -17.01773  28.79186 1S   89     0.00000
  620   40 ARG  CZ    -1.69445 -18.73075  29.21907 1S   89     1.00000
  621   40 ARG  NH1   -0.53114 -19.41831  29.09941 1S   89     1.00000
  622   40 ARG  HH11  -0.38227 -20.25288  29.62969 1S   89     0.00000
  623   40 ARG  HH12   0.21580 -19.04778  28.55113 1S   89     0.00000
  624   40 ARG  NH2   -2.72794 -19.27830  29.89886 1S   89     1.00000
  625   40 ARG  HH21  -3.59503 -18.79274  29.98546 1S   89     0.00000
  626   40 ARG  HH22  -2.64853 -20.19057  30.30344 1S   89     0.00000
  627   40 ARG  C     -2.82740 -12.95580  27.90368 1S   89     1.00000
  628   40 ARG  O     -3.86463 -13.60591  28.04487 1S   89     1.00000
  629   41 ALA  N     -2.61255 -12.08130  26.88019 1S   90     1.00000
  630   41 ALA  HN    -1.75142 -11.57634  26.82740 1S   90     0.00000
  631   41 ALA  CA    -3.54936 -11.81397  25.80156 1S   90     1.00000
  632   41 ALA  HA    -3.21403 -10.91690  25.29398 1S   90     0.00000
  633   41 ALA  CB    -3.61137 -12.98271  24.81185 1S   90     1.00000
  634   41 ALA  HB1   -3.96993 -13.88773  25.34892 1S   90     0.00000
  635   41 ALA  HB2   -2.60543 -13.18606  24.39399 1S   90     0.00000
  636   41 ALA  HB3   -4.31567 -12.75784  23.98295 1S   90     0.00000
  637   41 ALA  C     -4.96898 -11.56708  26.33336 1S   90     1.00000
  638   41 ALA  OT1   -5.97433 -11.79764  25.61328 1S   90     1.00000
  639   41 ALA  OT2   -5.04282 -11.19320  27.52713 1S   90     0.00000
  640   42 PRO  N      1.83188 -14.79024  21.86853 2S   106    1.00000
  641   42 PRO  HN1    1.24268 -14.81918  21.05309 2S   106    0.00000
  642   42 PRO  HN2    2.62487 -14.20759  21.66020 2S   106    0.00000
  643   42 PRO  CD     2.28947 -16.19007  22.17488 2S   106    1.00000
  644   42 PRO  HD1    3.37941 -16.29221  21.98208 2S   106    0.00000
  645   42 PRO  HD2    1.72853 -16.91549  21.54671 2S   106    0.00000
  646   42 PRO  CA     1.05652 -14.24022  23.02606 2S   106    1.00000
  647   42 PRO  HA     0.18037 -13.78109  22.59364 2S   106    0.00000
  648   42 PRO  CB     0.80136 -15.43647  23.93984 2S   106    1.00000
  649   42 PRO  HB1   -0.15892 -15.92414  23.67045 2S   106    0.00000
  650   42 PRO  HB2    0.78253 -15.15408  25.01478 2S   106    0.00000
  651   42 PRO  CG     1.95152 -16.39461  23.64979 2S   106    1.00000
  652   42 PRO  HG1    2.80933 -16.07836  24.27070 2S   106    0.00000
  653   42 PRO  HG2    1.69940 -17.44656  23.88458 2S   106    0.00000
  654   42 PRO  C      1.86735 -13.18042  23.71683 2S   106    1.00000
  655   42 PRO  O      3.09610 -13.24856  23.74144 2S   106    1.00000
  656   43 ARG  N      1.16752 -12.18022  24.28828 2S   107    1.00000
  657   43 ARG  HN     0.17016 -12.15925  24.26038 2S   107    0.00000
  658   43 ARG  CA     1.79259 -11.04499  24.91074 2S   107    1.00000
  659   43 ARG  HA     2.86493 -11.17282  24.95224 2S   107    0.00000
  660   43 ARG  CB     1.45692  -9.76003  24.14870 2S   107    1.00000
  661   43 ARG  HB1    1.72422  -8.87495  24.75134 2S   107    0.00000
  662   43 ARG  HB2    0.36248  -9.71426  23.95900 2S   107    0.00000
  663   43 ARG  CG     2.19855  -9.63999  22.81773 2S   107    1.00000
  664   43 ARG  HG1    2.06877 -10.58025  22.23824 2S   107    0.00000
  665   43 ARG  HG2    3.28577  -9.50969  23.02054 2S   107    0.00000
  666   43 ARG  CD     1.65650  -8.46097  22.00642 2S   107    1.00000
  667   43 ARG  HD1    1.57626  -7.55546  22.64423 2S   107    0.00000
  668   43 ARG  HD2    0.65584  -8.69977  21.58365 2S   107    0.00000
  669   43 ARG  NE     2.60691  -8.14661  20.90018 2S   107    1.00000
  670   43 ARG  HE     3.21179  -7.35821  20.99979 2S   107    0.00000
  671   43 ARG  CZ     2.67476  -8.88154  19.75566 2S   107    1.00000
  672   43 ARG  NH1    3.55645  -8.51950  18.79000 2S   107    1.00000
  673   43 ARG  HH11   4.13568  -7.71898  18.93017 2S   107    0.00000
  674   43 ARG  HH12   3.60418  -9.04673  17.94378 2S   107    0.00000
  675   43 ARG  NH2    1.87578  -9.96301  19.56480 2S   107    1.00000
  676   43 ARG  HH21   1.23415 -10.22332  20.28396 2S   107    0.00000
  677   43 ARG  HH22   1.94373 -10.49073  18.72084 2S   107    0.00000
  678   43 ARG  C      1.29287 -10.90721  26.31578 2S   107    1.00000
  679   43 ARG  O      0.14747 -11.23033  26.61726 2S   107    1.00000
  680   44 TRP  N      2.17739 -10.41891  27.21125 2S   108    1.00000
  681   44 TRP  HN     3.10024 -10.16044  26.93406 2S   108    0.00000
  682   44 TRP  CA     1.90677 -10.31280  28.62226 2S   108    1.00000
  683   44 TRP  HA     0.93860 -10.73133  28.84464 2S   108    0.00000
  684   44 TRP  CB     2.96318 -11.05788  29.46458 2S   108    1.00000
  685   44 TRP  HB1    2.79056 -10.87347  30.54469 2S   108    0.00000
  686   44 TRP  HB2    3.97220 -10.67186  29.19681 2S   108    0.00000
  687   44 TRP  CG     2.95404 -12.55411  29.21073 2S   108    1.00000
  688   44 TRP  CD1    3.51282 -13.22362  28.15760 2S   108    1.00000
  689   44 TRP  HD1    4.05260 -12.75792  27.34786 2S   108    0.00000
  690   44 TRP  NE1    3.27451 -14.57064  28.26429 2S   108    1.00000
  691   44 TRP  HE1    3.56844 -15.25643  27.63634 2S   108    0.00000
  692   44 TRP  CE2    2.55213 -14.79994  29.40940 2S   108    1.00000
  693   44 TRP  CD2    2.31622 -13.55458  30.03078 2S   108    1.00000
  694   44 TRP  CE3    1.58769 -13.47449  31.21737 2S   108    1.00000
  695   44 TRP  HE3    1.37782 -12.54011  31.70683 2S   108    0.00000
  696   44 TRP  CZ3    1.10631 -14.66867  31.77746 2S   108    1.00000
  697   44 TRP  HZ3    0.53057 -14.63626  32.69109 2S   108    0.00000
  698   44 TRP  CZ2    2.07953 -15.97872  29.96590 2S   108    1.00000
  699   44 TRP  HZ2    2.24205 -16.93280  29.48851 2S   108    0.00000
  700   44 TRP  CH2    1.34619 -15.90381  31.15671 2S   108    1.00000
  701   44 TRP  HH2    0.94737 -16.81018  31.58845 2S   108    0.00000
  702   44 TRP  C      1.89246  -8.85878  28.99461 2S   108    1.00000
  703   44 TRP  O      2.92442  -8.19124  28.98496 2S   108    1.00000
  704   45 TYR  N      0.69400  -8.33579  29.32810 2S   109    1.00000
  705   45 TYR  HN    -0.13226  -8.89880  29.32145 2S   109    0.00000
  706   45 TYR  CA     0.48925  -6.94665  29.64851 2S   109    1.00000
  707   45 TYR  HA     1.31017  -6.36137  29.26357 2S   109    0.00000
  708   45 TYR  CB    -0.85013  -6.40083  29.09587 2S   109    1.00000
  709   45 TYR  HB1   -1.06893  -5.41266  29.54995 2S   109    0.00000
  710   45 TYR  HB2   -1.67743  -7.09765  29.34440 2S   109    0.00000
  711   45 TYR  CG    -0.82938  -6.23157  27.59836 2S   109    1.00000
  712   45 TYR  CD1   -0.81121  -7.33703  26.73243 2S   109    1.00000
  713   45 TYR  HD1   -0.79088  -8.33704  27.13589 2S   109    0.00000
  714   45 TYR  CE1   -0.82930  -7.15572  25.34391 2S   109    1.00000
  715   45 TYR  HE1   -0.81218  -8.01362  24.69419 2S   109    0.00000
  716   45 TYR  CZ    -0.86537  -5.86464  24.80402 2S   109    1.00000
  717   45 TYR  OH    -0.92429  -5.66198  23.41344 2S   109    1.00000
  718   45 TYR  HH    -1.42163  -6.39232  23.04147 2S   109    0.00000
  719   45 TYR  CD2   -0.87961  -4.95015  27.03034 2S   109    1.00000
  720   45 TYR  HD2   -0.92597  -4.09503  27.66115 2S   109    0.00000
  721   45 TYR  CE2   -0.88518  -4.75862  25.64839 2S   109    1.00000
  722   45 TYR  HE2   -0.92500  -3.76168  25.23538 2S   109    0.00000
  723   45 TYR  C      0.44700  -6.80827  31.14774 2S   109    1.00000
  724   45 TYR  O     -0.29735  -7.51244  31.81892 2S   109    1.00000
  725   46 PHE  N      1.24277  -5.87833  31.71335 2S   110    1.00000
  726   46 PHE  HN     1.83310  -5.30094  31.14647 2S   110    0.00000
  727   46 PHE  CA     1.31223  -5.63523  33.13086 2S   110    1.00000
  728   46 PHE  HA     1.16917  -6.57739  33.63545 2S   110    0.00000
  729   46 PHE  CB     2.68746  -5.04589  33.53413 2S   110    1.00000
  730   46 PHE  HB1    2.89536  -4.11696  32.96398 2S   110    0.00000
  731   46 PHE  HB2    3.47804  -5.77461  33.29210 2S   110    0.00000
  732   46 PHE  CG     2.79998  -4.74926  35.00235 2S   110    1.00000
  733   46 PHE  CD1    3.12308  -5.75476  35.92288 2S   110    1.00000
  734   46 PHE  HD1    3.30398  -6.76022  35.57993 2S   110    0.00000
  735   46 PHE  CE1    3.19884  -5.45701  37.28611 2S   110    1.00000
  736   46 PHE  HE1    3.43794  -6.22609  37.99095 2S   110    0.00000
  737   46 PHE  CZ     2.94611  -4.16178  37.74508 2S   110    1.00000
  738   46 PHE  HZ     3.01009  -3.94079  38.79984 2S   110    0.00000
  739   46 PHE  CD2    2.53554  -3.45220  35.46911 2S   110    1.00000
  740   46 PHE  HD2    2.25463  -2.68208  34.76750 2S   110    0.00000
  741   46 PHE  CE2    2.60726  -3.15882  36.83285 2S   110    1.00000
  742   46 PHE  HE2    2.40135  -2.15947  37.17698 2S   110    0.00000
  743   46 PHE  C      0.22156  -4.68585  33.55368 2S   110    1.00000
  744   46 PHE  O     -0.03594  -3.67001  32.92482 2S   110    1.00000
  745   47 TYR  N     -0.42815  -4.98531  34.68410 2S   111    1.00000
  746   47 TYR  HN    -0.22263  -5.82612  35.18696 2S   111    0.00000
  747   47 TYR  CA    -1.42858  -4.12915  35.24861 2S   111    1.00000
  748   47 TYR  HA    -1.35529  -3.13091  34.84291 2S   111    0.00000
  749   47 TYR  CB    -2.84769  -4.69688  35.06087 2S   111    1.00000
  750   47 TYR  HB1   -3.60476  -4.03854  35.53721 2S   111    0.00000
  751   47 TYR  HB2   -2.89750  -5.70553  35.51207 2S   111    0.00000
  752   47 TYR  CG    -3.19560  -4.84193  33.60791 2S   111    1.00000
  753   47 TYR  CD1   -3.01952  -6.06500  32.92972 2S   111    1.00000
  754   47 TYR  HD1   -2.60372  -6.91451  33.44828 2S   111    0.00000
  755   47 TYR  CE1   -3.36749  -6.18694  31.57864 2S   111    1.00000
  756   47 TYR  HE1   -3.21791  -7.11185  31.05479 2S   111    0.00000
  757   47 TYR  CZ    -3.91009  -5.10166  30.89528 2S   111    1.00000
  758   47 TYR  OH    -4.27022  -5.20896  29.53523 2S   111    1.00000
  759   47 TYR  HH    -4.06335  -6.10318  29.25495 2S   111    0.00000
  760   47 TYR  CD2   -3.73445  -3.75416  32.91019 2S   111    1.00000
  761   47 TYR  HD2   -3.89044  -2.80743  33.40769 2S   111    0.00000
  762   47 TYR  CE2   -4.10430  -3.90419  31.57383 2S   111    1.00000
  763   47 TYR  HE2   -4.56380  -3.10206  31.05616 2S   111    0.00000
  764   47 TYR  C     -1.13701  -4.05452  36.71364 2S   111    1.00000
  765   47 TYR  O     -0.90241  -5.06910  37.36276 2S   111    1.00000
  766   48 TYR  N     -1.15837  -2.83120  37.28729 2S   112    1.00000
  767   48 TYR  HN    -1.32698  -2.00908  36.74922 2S   112    0.00000
  768   48 TYR  CA    -0.95462  -2.61869  38.70201 2S   112    1.00000
  769   48 TYR  HA    -0.04103  -3.11668  38.99656 2S   112    0.00000
  770   48 TYR  CB    -0.89214  -1.11344  39.05781 2S   112    1.00000
  771   48 TYR  HB1   -1.06950  -0.95168  40.14095 2S   112    0.00000
  772   48 TYR  HB2   -1.66106  -0.55808  38.47810 2S   112    0.00000
  773   48 TYR  CG     0.45997  -0.53386  38.74337 2S   112    1.00000
  774   48 TYR  CD1    1.53934  -0.75522  39.61408 2S   112    1.00000
  775   48 TYR  HD1    1.39519  -1.36039  40.49445 2S   112    0.00000
  776   48 TYR  CE1    2.79587  -0.19310  39.35775 2S   112    1.00000
  777   48 TYR  HE1    3.61591  -0.37157  40.03860 2S   112    0.00000
  778   48 TYR  CZ     2.98200   0.60047  38.22124 2S   112    1.00000
  779   48 TYR  OH     4.25410   1.13622  37.95080 2S   112    1.00000
  780   48 TYR  HH     4.88600   0.66128  38.49489 2S   112    0.00000
  781   48 TYR  CD2    0.66266   0.26587  37.60650 2S   112    1.00000
  782   48 TYR  HD2   -0.15764   0.45754  36.93334 2S   112    0.00000
  783   48 TYR  CE2    1.91539   0.83636  37.34640 2S   112    1.00000
  784   48 TYR  HE2    2.05669   1.44832  36.46726 2S   112    0.00000
  785   48 TYR  C     -2.08336  -3.25452  39.47226 2S   112    1.00000
  786   48 TYR  O     -3.19377  -3.40215  38.96892 2S   112    1.00000
  787   49 LEU  N     -1.80574  -3.69437  40.71604 2S   113    1.00000
  788   49 LEU  HN    -0.89435  -3.58236  41.11109 2S   113    0.00000
  789   49 LEU  CA    -2.73420  -4.45318  41.51747 2S   113    1.00000
  790   49 LEU  HA    -2.97208  -5.36407  40.98427 2S   113    0.00000
  791   49 LEU  CB    -2.10330  -4.80324  42.88047 2S   113    1.00000
  792   49 LEU  HB1   -1.66526  -3.87811  43.31631 2S   113    0.00000
  793   49 LEU  HB2   -1.26707  -5.51730  42.70641 2S   113    0.00000
  794   49 LEU  CG    -3.05821  -5.42500  43.91553 2S   113    1.00000
  795   49 LEU  HG    -3.88737  -4.70747  44.11691 2S   113    0.00000
  796   49 LEU  CD1   -3.66785  -6.74212  43.41416 2S   113    1.00000
  797   49 LEU  HD11  -2.85629  -7.47297  43.22230 2S   113    0.00000
  798   49 LEU  HD12  -4.23813  -6.58389  42.47552 2S   113    0.00000
  799   49 LEU  HD13  -4.35448  -7.16597  44.17506 2S   113    0.00000
  800   49 LEU  CD2   -2.32432  -5.63241  45.24280 2S   113    1.00000
  801   49 LEU  HD21  -1.94050  -4.66383  45.62803 2S   113    0.00000
  802   49 LEU  HD22  -1.47268  -6.32917  45.09931 2S   113    0.00000
  803   49 LEU  HD23  -3.02330  -6.06337  45.98585 2S   113    0.00000
  804   49 LEU  C     -4.00115  -3.67216  41.73011 2S   113    1.00000
  805   49 LEU  O     -3.96451  -2.55488  42.23099 2S   113    1.00000
  806   50 GLY  N     -5.14633  -4.24078  41.29403 2S   114    1.00000
  807   50 GLY  HN    -5.14918  -5.15079  40.88438 2S   114    0.00000
  808   50 GLY  CA    -6.42956  -3.60187  41.44842 2S   114    1.00000
  809   50 GLY  HA1   -6.38561  -2.90102  42.26825 2S   114    0.00000
  810   50 GLY  HA2   -7.13839  -4.38984  41.62997 2S   114    0.00000
  811   50 GLY  C     -6.88561  -2.85052  40.22987 2S   114    1.00000
  812   50 GLY  O     -7.95615  -2.25112  40.26310 2S   114    1.00000
  813   51 THR  N     -6.10487  -2.84298  39.12474 2S   115    1.00000
  814   51 THR  HN    -5.21402  -3.29599  39.11352 2S   115    0.00000
  815   51 THR  CA    -6.48435  -2.14753  37.90546 2S   115    1.00000
  816   51 THR  HA    -7.49855  -1.78466  37.98714 2S   115    0.00000
  817   51 THR  CB    -5.55967  -0.98855  37.56171 2S   115    1.00000
  818   51 THR  HB    -5.85845  -0.52342  36.59794 2S   115    0.00000
  819   51 THR  OG1   -4.20293  -1.39447  37.43996 2S   115    1.00000
  820   51 THR  HG1   -4.02775  -1.93927  38.21777 2S   115    0.00000
  821   51 THR  CG2   -5.66016   0.07782  38.66067 2S   115    1.00000
  822   51 THR  HG21  -5.35869  -0.33438  39.64664 2S   115    0.00000
  823   51 THR  HG22  -6.70246   0.45324  38.73575 2S   115    0.00000
  824   51 THR  HG23  -4.98939   0.92831  38.42090 2S   115    0.00000
  825   51 THR  C     -6.47894  -3.13082  36.77935 2S   115    1.00000
  826   51 THR  O     -5.97208  -4.23027  36.94488 2S   115    1.00000
  827   52 GLY  N     -7.03756  -2.74529  35.60676 2S   116    1.00000
  828   52 GLY  HN    -7.45974  -1.84677  35.51418 2S   116    0.00000
  829   52 GLY  CA    -7.00819  -3.55265  34.40578 2S   116    1.00000
  830   52 GLY  HA1   -6.07756  -4.09936  34.38458 2S   116    0.00000
  831   52 GLY  HA2   -7.12543  -2.87806  33.57020 2S   116    0.00000
  832   52 GLY  C     -8.14840  -4.52937  34.37253 2S   116    1.00000
  833   52 GLY  O     -9.09893  -4.38898  35.14229 2S   116    1.00000
  834   53 PRO  N     -8.10198  -5.54255  33.50491 2S   117    1.00000
  835   53 PRO  CD    -7.12322  -5.65797  32.41761 2S   117    1.00000
  836   53 PRO  HD1   -6.25336  -6.24616  32.78429 2S   117    0.00000
  837   53 PRO  HD2   -6.78167  -4.67260  32.03069 2S   117    0.00000
  838   53 PRO  CA    -9.20093  -6.48593  33.35118 2S   117    1.00000
  839   53 PRO  HA   -10.12003  -5.92905  33.23993 2S   117    0.00000
  840   53 PRO  CB    -8.83872  -7.30494  32.09926 2S   117    1.00000
  841   53 PRO  HB1   -9.73654  -7.53548  31.49077 2S   117    0.00000
  842   53 PRO  HB2   -8.32603  -8.25322  32.37194 2S   117    0.00000
  843   53 PRO  CG    -7.85632  -6.42435  31.31924 2S   117    1.00000
  844   53 PRO  HG1   -7.16956  -7.02144  30.68765 2S   117    0.00000
  845   53 PRO  HG2   -8.42101  -5.70852  30.68293 2S   117    0.00000
  846   53 PRO  C     -9.36288  -7.38771  34.54959 2S   117    1.00000
  847   53 PRO  O    -10.45464  -7.91803  34.73716 2S   117    1.00000
  848   54 GLU  N     -8.30724  -7.57931  35.36482 2S   118    1.00000
  849   54 GLU  HN    -7.41056  -7.18104  35.16644 2S   118    0.00000
  850   54 GLU  CA    -8.37423  -8.41258  36.53971 2S   118    1.00000
  851   54 GLU  HA    -9.34583  -8.87666  36.60944 2S   118    0.00000
  852   54 GLU  CB    -7.30692  -9.51916  36.51892 2S   118    1.00000
  853   54 GLU  HB1   -7.47317 -10.18961  37.38185 2S   118    0.00000
  854   54 GLU  HB2   -6.29862  -9.08408  36.65350 2S   118    0.00000
  855   54 GLU  CG    -7.27647 -10.31948  35.20551 2S   118    1.00000
  856   54 GLU  HG1   -6.38754 -10.97247  35.22286 2S   118    0.00000
  857   54 GLU  HG2   -7.17951  -9.63478  34.33748 2S   118    0.00000
  858   54 GLU  CD    -8.51276 -11.19368  35.02073 2S   118    1.00000
  859   54 GLU  OE1   -9.17288 -11.54076  36.03455 2S   118    1.00000
  860   54 GLU  OE2   -8.80045 -11.54490  33.84483 2S   118    1.00000
  861   54 GLU  C     -8.17473  -7.56723  37.76633 2S   118    1.00000
  862   54 GLU  O     -7.24550  -7.77016  38.54693 2S   118    1.00000
  863   55 ALA  N     -9.07238  -6.58498  37.97699 2S   119    1.00000
  864   55 ALA  HN    -9.82568  -6.42563  37.34311 2S   119    0.00000
  865   55 ALA  CA    -8.96703  -5.66063  39.07672 2S   119    1.00000
  866   55 ALA  HA    -7.93583  -5.34351  39.15587 2S   119    0.00000
  867   55 ALA  CB    -9.85816  -4.43121  38.84210 2S   119    1.00000
  868   55 ALA  HB1  -10.92013  -4.72576  38.71564 2S   119    0.00000
  869   55 ALA  HB2   -9.52638  -3.90373  37.92136 2S   119    0.00000
  870   55 ALA  HB3   -9.78765  -3.72411  39.69413 2S   119    0.00000
  871   55 ALA  C     -9.34729  -6.31202  40.38165 2S   119    1.00000
  872   55 ALA  O     -8.61715  -6.21739  41.36532 2S   119    1.00000
  873   56 GLY  N    -10.49643  -7.02433  40.41693 2S   120    1.00000
  874   56 GLY  HN   -11.06847  -7.11715  39.60589 2S   120    0.00000
  875   56 GLY  CA   -11.01214  -7.61699  41.63399 2S   120    1.00000
  876   56 GLY  HA1  -12.01035  -7.96389  41.41551 2S   120    0.00000
  877   56 GLY  HA2  -10.99228  -6.86110  42.40670 2S   120    0.00000
  878   56 GLY  C    -10.22763  -8.79890  42.13237 2S   120    1.00000
  879   56 GLY  O    -10.48113  -9.28039  43.23424 2S   120    1.00000
  880   57 LEU  N     -9.24518  -9.29801  41.34818 2S   121    1.00000
  881   57 LEU  HN    -9.03430  -8.90131  40.45733 2S   121    0.00000
  882   57 LEU  CA    -8.43654 -10.42606  41.73792 2S   121    1.00000
  883   57 LEU  HA    -9.10780 -11.20073  42.06663 2S   121    0.00000
  884   57 LEU  CB    -7.60036 -10.96446  40.55683 2S   121    1.00000
  885   57 LEU  HB1   -6.60102 -11.30145  40.90770 2S   121    0.00000
  886   57 LEU  HB2   -7.44248 -10.13792  39.83028 2S   121    0.00000
  887   57 LEU  CG    -8.23727 -12.15644  39.81535 2S   121    1.00000
  888   57 LEU  HG    -8.33536 -12.99800  40.54075 2S   121    0.00000
  889   57 LEU  CD1   -9.63512 -11.81867  39.27013 2S   121    1.00000
  890   57 LEU  HD11  -9.56385 -10.95643  38.57202 2S   121    0.00000
  891   57 LEU  HD12 -10.32525 -11.54495  40.09488 2S   121    0.00000
  892   57 LEU  HD13 -10.06073 -12.68464  38.72359 2S   121    0.00000
  893   57 LEU  CD2   -7.29882 -12.63168  38.69484 2S   121    1.00000
  894   57 LEU  HD21  -6.23957 -12.42698  38.95348 2S   121    0.00000
  895   57 LEU  HD22  -7.53453 -12.10278  37.75356 2S   121    0.00000
  896   57 LEU  HD23  -7.42178 -13.71577  38.51444 2S   121    0.00000
  897   57 LEU  C     -7.48934 -10.02660  42.84941 2S   121    1.00000
  898   57 LEU  O     -6.73639  -9.06753  42.67355 2S   121    1.00000
  899   58 PRO  N     -7.47095 -10.70148  44.00019 2S   122    1.00000
  900   58 PRO  CD    -8.38120 -11.79126  44.37483 2S   122    1.00000
  901   58 PRO  HD1   -8.40499 -12.57990  43.59147 2S   122    0.00000
  902   58 PRO  HD2   -9.40247 -11.37958  44.53138 2S   122    0.00000
  903   58 PRO  CA    -6.52774 -10.38823  45.05432 2S   122    1.00000
  904   58 PRO  HA    -6.47728  -9.31960  45.20568 2S   122    0.00000
  905   58 PRO  CB    -7.05537 -11.15883  46.27335 2S   122    1.00000
  906   58 PRO  HB1   -7.76557 -10.51124  46.83282 2S   122    0.00000
  907   58 PRO  HB2   -6.25297 -11.49392  46.96176 2S   122    0.00000
  908   58 PRO  CG    -7.82235 -12.34576  45.68442 2S   122    1.00000
  909   58 PRO  HG1   -7.10677 -13.16749  45.46536 2S   122    0.00000
  910   58 PRO  HG2   -8.61686 -12.71112  46.36435 2S   122    0.00000
  911   58 PRO  C     -5.16175 -10.88247  44.67500 2S   122    1.00000
  912   58 PRO  O     -5.03515 -11.75917  43.82148 2S   122    1.00000
  913   59 TYR  N     -4.11819 -10.32631  45.31922 2S   123    1.00000
  914   59 TYR  HN    -4.25500  -9.59991  45.98858 2S   123    0.00000
  915   59 TYR  CA    -2.75460 -10.71050  45.06822 2S   123    1.00000
  916   59 TYR  HA    -2.58282 -10.63858  44.00335 2S   123    0.00000
  917   59 TYR  CB    -1.78165  -9.77683  45.82088 2S   123    1.00000
  918   59 TYR  HB1   -1.94929  -9.87858  46.91060 2S   123    0.00000
  919   59 TYR  HB2   -1.97583  -8.72267  45.52770 2S   123    0.00000
  920   59 TYR  CG    -0.34029 -10.08228  45.53712 2S   123    1.00000
  921   59 TYR  CD1    0.30357  -9.49985  44.43838 2S   123    1.00000
  922   59 TYR  HD1   -0.23752  -8.82035  43.79646 2S   123    0.00000
  923   59 TYR  CE1    1.64989  -9.77551  44.18301 2S   123    1.00000
  924   59 TYR  HE1    2.12908  -9.32731  43.32742 2S   123    0.00000
  925   59 TYR  CZ     2.35441 -10.65990  45.00840 2S   123    1.00000
  926   59 TYR  OH     3.70253 -10.95495  44.72938 2S   123    1.00000
  927   59 TYR  HH     3.95014 -10.45343  43.95028 2S   123    0.00000
  928   59 TYR  CD2    0.37612 -10.96161  46.36812 2S   123    1.00000
  929   59 TYR  HD2   -0.11557 -11.42517  47.21110 2S   123    0.00000
  930   59 TYR  CE2    1.71746 -11.25465  46.10282 2S   123    1.00000
  931   59 TYR  HE2    2.25671 -11.93726  46.74319 2S   123    0.00000
  932   59 TYR  C     -2.55060 -12.13984  45.50799 2S   123    1.00000
  933   59 TYR  O     -2.93260 -12.52820  46.61108 2S   123    1.00000
  934   60 GLY  N     -1.95341 -12.95347  44.61415 2S   124    1.00000
  935   60 GLY  HN    -1.62768 -12.61258  43.73397 2S   124    0.00000
  936   60 GLY  CA    -1.70381 -14.34146  44.89517 2S   124    1.00000
  937   60 GLY  HA1   -1.61706 -14.48630  45.96298 2S   124    0.00000
  938   60 GLY  HA2   -0.80043 -14.60363  44.36604 2S   124    0.00000
  939   60 GLY  C     -2.78796 -15.23906  44.38590 2S   124    1.00000
  940   60 GLY  O     -2.64725 -16.45013  44.51193 2S   124    1.00000
  941   61 ALA  N     -3.87554 -14.68892  43.78555 2S   125    1.00000
  942   61 ALA  HN    -4.00643 -13.69977  43.76600 2S   125    0.00000
  943   61 ALA  CA    -4.93358 -15.45549  43.16273 2S   125    1.00000
  944   61 ALA  HA    -5.32441 -16.11627  43.92714 2S   125    0.00000
  945   61 ALA  CB    -6.10109 -14.58076  42.71389 2S   125    1.00000
  946   61 ALA  HB1   -5.74069 -13.86612  41.94563 2S   125    0.00000
  947   61 ALA  HB2   -6.50245 -14.00374  43.57160 2S   125    0.00000
  948   61 ALA  HB3   -6.92066 -15.20084  42.29142 2S   125    0.00000
  949   61 ALA  C     -4.45074 -16.22149  41.92008 2S   125    1.00000
  950   61 ALA  O     -3.66181 -15.75061  41.11759 2S   125    1.00000
  951   62 ASN  N     -4.90354 -17.47286  41.77460 2S   126    1.00000
  952   62 ASN  HN    -5.49493 -17.81808  42.49077 2S   126    0.00000
  953   62 ASN  CA    -4.20782 -18.58303  41.18498 2S   126    1.00000
  954   62 ASN  HA    -3.28177 -18.24711  40.73216 2S   126    0.00000
  955   62 ASN  CB    -3.93310 -19.81598  42.16147 2S   126    1.00000
  956   62 ASN  HB1   -2.86450 -20.09591  42.04127 2S   126    0.00000
  957   62 ASN  HB2   -4.45511 -20.72208  41.78191 2S   126    0.00000
  958   62 ASN  CG    -4.30363 -19.61609  43.67800 2S   126    0.00000
  959   62 ASN  OD1   -4.46755 -20.48513  44.52063 2S   126    0.00000
  960   62 ASN  ND2   -4.58442 -18.39951  44.16221 2S   126    0.00000
  961   62 ASN  HD21  -4.05136 -17.61874  43.81232 2S   126    0.00000
  962   62 ASN  HD22  -5.56754 -18.27637  44.29010 2S   126    0.00000
  963   62 ASN  C     -5.18848 -18.91202  40.11794 2S   126    1.00000
  964   62 ASN  O     -5.94087 -19.88379  40.17311 2S   126    1.00000
  965   63 LYS  N     -5.22669 -18.00728  39.13182 2S   127    1.00000
  966   63 LYS  HN    -4.68698 -17.16965  39.19772 2S   127    0.00000
  967   63 LYS  CA    -6.01115 -18.17735  37.95348 2S   127    1.00000
  968   63 LYS  HA    -6.59258 -19.08573  38.01768 2S   127    0.00000
  969   63 LYS  CB    -6.94800 -16.97774  37.72499 2S   127    1.00000
  970   63 LYS  HB1   -6.33172 -16.05644  37.62417 2S   127    0.00000
  971   63 LYS  HB2   -7.58505 -16.84796  38.62933 2S   127    0.00000
  972   63 LYS  CG    -7.87103 -17.12853  36.50783 2S   127    1.00000
  973   63 LYS  HG1   -8.88435 -17.43112  36.84267 2S   127    0.00000
  974   63 LYS  HG2   -7.51055 -17.93842  35.84522 2S   127    0.00000
  975   63 LYS  CD    -7.92839 -15.85268  35.66852 2S   127    1.00000
  976   63 LYS  HD1   -8.19032 -16.10955  34.61864 2S   127    0.00000
  977   63 LYS  HD2   -6.91288 -15.39392  35.64742 2S   127    0.00000
  978   63 LYS  CE    -8.92931 -14.84305  36.22247 2S   127    1.00000
  979   63 LYS  HE1   -8.82353 -13.88584  35.67852 2S   127    0.00000
  980   63 LYS  HE2   -8.76153 -14.68437  37.30701 2S   127    0.00000
  981   63 LYS  NZ   -10.32210 -15.31420  36.05109 2S   127    1.00000
  982   63 LYS  HZ1  -10.49587 -16.12341  36.68093 2S   127    0.00000
  983   63 LYS  HZ2  -10.46829 -15.60537  35.06380 2S   127    0.00000
  984   63 LYS  HZ3  -10.97477 -14.54005  36.28748 2S   127    0.00000
  985   63 LYS  C     -5.02593 -18.30827  36.82916 2S   127    1.00000
  986   63 LYS  O     -3.94190 -17.72659  36.85641 2S   127    1.00000
  987   64 ASP  N     -5.39272 -19.09775  35.79760 2S   128    1.00000
  988   64 ASP  HN    -6.27743 -19.55854  35.79523 2S   128    0.00000
  989   64 ASP  CA    -4.58299 -19.31187  34.63119 2S   128    1.00000
  990   64 ASP  HA    -3.60314 -19.60674  34.98080 2S   128    0.00000
  991   64 ASP  CB    -5.19812 -20.42316  33.74856 2S   128    1.00000
  992   64 ASP  HB1   -6.08665 -20.03229  33.20710 2S   128    0.00000
  993   64 ASP  HB2   -5.52770 -21.26410  34.39508 2S   128    0.00000
  994   64 ASP  CG    -4.18651 -20.97055  32.74855 2S   128    1.00000
  995   64 ASP  OD1   -3.20757 -21.63072  33.18360 2S   128    1.00000
  996   64 ASP  OD2   -4.39122 -20.73213  31.53202 2S   128    1.00000
  997   64 ASP  C     -4.46265 -18.02952  33.83438 2S   128    1.00000
  998   64 ASP  O     -5.41650 -17.26190  33.70559 2S   128    1.00000
  999   65 GLY  N     -3.24687 -17.76669  33.30756 2S   129    1.00000
 1000   65 GLY  HN    -2.49561 -18.41499  33.41098 2S   129    0.00000
 1001   65 GLY  CA    -2.97788 -16.59089  32.51385 2S   129    1.00000
 1002   65 GLY  HA1   -3.85603 -16.36932  31.92277 2S   129    0.00000
 1003   65 GLY  HA2   -2.11296 -16.81227  31.90803 2S   129    0.00000
 1004   65 GLY  C     -2.65717 -15.37960  33.34355 2S   129    1.00000
 1005   65 GLY  O     -2.57652 -14.28212  32.79570 2S   129    1.00000
 1006   66 ILE  N     -2.47798 -15.54336  34.67847 2S   130    1.00000
 1007   66 ILE  HN    -2.55497 -16.44082  35.10699 2S   130    0.00000
 1008   66 ILE  CA    -2.20043 -14.45302  35.58518 2S   130    1.00000
 1009   66 ILE  HA    -1.87754 -13.59458  35.02183 2S   130    0.00000
 1010   66 ILE  CB    -3.40259 -14.08684  36.46251 2S   130    1.00000
 1011   66 ILE  HB    -3.78524 -15.00884  36.95844 2S   130    0.00000
 1012   66 ILE  CG2   -3.01138 -13.07516  37.56133 2S   130    1.00000
 1013   66 ILE  HG21  -2.47300 -12.21281  37.11676 2S   130    0.00000
 1014   66 ILE  HG22  -2.35959 -13.55079  38.32176 2S   130    0.00000
 1015   66 ILE  HG23  -3.92338 -12.69794  38.07107 2S   130    0.00000
 1016   66 ILE  CG1   -4.54970 -13.51416  35.60053 2S   130    1.00000
 1017   66 ILE  HG11  -5.43065 -13.32564  36.25458 2S   130    0.00000
 1018   66 ILE  HG12  -4.85114 -14.26824  34.84235 2S   130    0.00000
 1019   66 ILE  CD    -4.17565 -12.20877  34.89476 2S   130    1.00000
 1020   66 ILE  HD1   -3.22066 -12.29768  34.34638 2S   130    0.00000
 1021   66 ILE  HD2   -4.07793 -11.38475  35.63244 2S   130    0.00000
 1022   66 ILE  HD3   -4.95416 -11.94015  34.15335 2S   130    0.00000
 1023   66 ILE  C     -1.03420 -14.86056  36.43338 2S   130    1.00000
 1024   66 ILE  O     -1.06162 -15.90531  37.08095 2S   130    1.00000
 1025   67 ILE  N      0.02911 -14.02068  36.44597 2S   131    1.00000
 1026   67 ILE  HN     0.06874 -13.22090  35.84932 2S   131    0.00000
 1027   67 ILE  CA     1.14224 -14.18070  37.35281 2S   131    1.00000
 1028   67 ILE  HA     0.93403 -14.97927  38.05037 2S   131    0.00000
 1029   67 ILE  CB     2.45894 -14.45990  36.64901 2S   131    1.00000
 1030   67 ILE  HB     3.26270 -14.57050  37.41385 2S   131    0.00000
 1031   67 ILE  CG2    2.33910 -15.79199  35.88269 2S   131    1.00000
 1032   67 ILE  HG21   1.80645 -15.63613  34.91965 2S   131    0.00000
 1033   67 ILE  HG22   1.78848 -16.54806  36.47824 2S   131    0.00000
 1034   67 ILE  HG23   3.34750 -16.19163  35.66299 2S   131    0.00000
 1035   67 ILE  CG1    2.83422 -13.31091  35.69469 2S   131    1.00000
 1036   67 ILE  HG11   2.58708 -12.33105  36.15092 2S   131    0.00000
 1037   67 ILE  HG12   2.23450 -13.40376  34.76131 2S   131    0.00000
 1038   67 ILE  CD     4.31439 -13.26196  35.35203 2S   131    1.00000
 1039   67 ILE  HD1    4.53269 -13.99444  34.55520 2S   131    0.00000
 1040   67 ILE  HD2    4.93002 -13.49244  36.24742 2S   131    0.00000
 1041   67 ILE  HD3    4.58492 -12.25282  34.97728 2S   131    0.00000
 1042   67 ILE  C      1.26011 -12.91501  38.16034 2S   131    1.00000
 1043   67 ILE  O      0.78146 -11.86194  37.74744 2S   131    1.00000
 1044   68 TRP  N      1.90858 -12.99607  39.34130 2S   132    1.00000
 1045   68 TRP  HN     2.32015 -13.84964  39.64952 2S   132    0.00000
 1046   68 TRP  CA     1.97306 -11.89358  40.27129 2S   132    1.00000
 1047   68 TRP  HA     1.49432 -11.01815  39.85404 2S   132    0.00000
 1048   68 TRP  CB     1.28500 -12.23964  41.60465 2S   132    1.00000
 1049   68 TRP  HB1    1.40480 -11.40714  42.31914 2S   132    0.00000
 1050   68 TRP  HB2    1.75318 -13.15106  42.03927 2S   132    0.00000
 1051   68 TRP  CG    -0.18995 -12.50031  41.43513 2S   132    1.00000
 1052   68 TRP  CD1   -0.79494 -13.70792  41.26670 2S   132    1.00000
 1053   68 TRP  HD1   -0.28629 -14.66128  41.26618 2S   132    0.00000
 1054   68 TRP  NE1   -2.13935 -13.53633  41.09221 2S   132    1.00000
 1055   68 TRP  HE1   -2.79013 -14.26021  40.97381 2S   132    0.00000
 1056   68 TRP  CE2   -2.43940 -12.20558  41.14392 2S   132    1.00000
 1057   68 TRP  CD2   -1.23481 -11.50933  41.35805 2S   132    1.00000
 1058   68 TRP  CE3   -1.22277 -10.12291  41.45185 2S   132    1.00000
 1059   68 TRP  HE3   -0.31343  -9.56300  41.58721 2S   132    0.00000
 1060   68 TRP  CZ3   -2.44641  -9.44599  41.32610 2S   132    1.00000
 1061   68 TRP  HZ3   -2.46051  -8.36843  41.35612 2S   132    0.00000
 1062   68 TRP  CZ2   -3.64961 -11.53936  41.02160 2S   132    1.00000
 1063   68 TRP  HZ2   -4.57408 -12.07191  40.86708 2S   132    0.00000
 1064   68 TRP  CH2   -3.64391 -10.14319  41.11399 2S   132    1.00000
 1065   68 TRP  HH2   -4.57342  -9.60082  41.01902 2S   132    0.00000
 1066   68 TRP  C      3.40399 -11.53942  40.54323 2S   132    1.00000
 1067   68 TRP  O      4.25291 -12.41015  40.72889 2S   132    1.00000
 1068   69 VAL  N      3.69027 -10.21838  40.56300 2S   133    1.00000
 1069   69 VAL  HN     2.98630  -9.53729  40.36467 2S   133    0.00000
 1070   69 VAL  CA     5.00080  -9.68551  40.85328 2S   133    1.00000
 1071   69 VAL  HA     5.60947 -10.45392  41.30893 2S   133    0.00000
 1072   69 VAL  CB     5.71658  -9.13213  39.62807 2S   133    1.00000
 1073   69 VAL  HB     6.67717  -8.65157  39.92798 2S   133    0.00000
 1074   69 VAL  CG1    6.03525 -10.28293  38.66015 2S   133    1.00000
 1075   69 VAL  HG11   5.10865 -10.79299  38.32626 2S   133    0.00000
 1076   69 VAL  HG12   6.69372 -11.02057  39.15952 2S   133    0.00000
 1077   69 VAL  HG13   6.54795  -9.88681  37.75842 2S   133    0.00000
 1078   69 VAL  CG2    4.84502  -8.08693  38.92646 2S   133    1.00000
 1079   69 VAL  HG21   4.63320  -7.23226  39.59996 2S   133    0.00000
 1080   69 VAL  HG22   3.87859  -8.52703  38.60126 2S   133    0.00000
 1081   69 VAL  HG23   5.36689  -7.69713  38.02705 2S   133    0.00000
 1082   69 VAL  C      4.82990  -8.58911  41.87045 2S   133    1.00000
 1083   69 VAL  O      3.76153  -7.98865  41.98837 2S   133    1.00000
 1084   70 ALA  N      5.90025  -8.31225  42.64555 2S   134    1.00000
 1085   70 ALA  HN     6.76783  -8.79292  42.54254 2S   134    0.00000
 1086   70 ALA  CA     5.84996  -7.30219  43.66808 2S   134    1.00000
 1087   70 ALA  HA     5.40803  -6.40880  43.25023 2S   134    0.00000
 1088   70 ALA  CB     5.06643  -7.75920  44.91270 2S   134    1.00000
 1089   70 ALA  HB1    5.59460  -8.57851  45.44376 2S   134    0.00000
 1090   70 ALA  HB2    4.07619  -8.14954  44.60006 2S   134    0.00000
 1091   70 ALA  HB3    4.90101  -6.91206  45.61098 2S   134    0.00000
 1092   70 ALA  C      7.25521  -6.98576  44.08083 2S   134    1.00000
 1093   70 ALA  O      8.09828  -7.87521  44.16981 2S   134    1.00000
 1094   71 THR  N      7.53300  -5.69038  44.33969 2S   135    1.00000
 1095   71 THR  HN     6.83845  -4.98111  44.21930 2S   135    0.00000
 1096   71 THR  CA     8.83153  -5.21552  44.76182 2S   135    1.00000
 1097   71 THR  HA     9.59001  -5.91207  44.43893 2S   135    0.00000
 1098   71 THR  CB     9.15207  -3.84047  44.20082 2S   135    1.00000
 1099   71 THR  HB     8.50609  -3.07652  44.68686 2S   135    0.00000
 1100   71 THR  OG1    8.91975  -3.84056  42.79726 2S   135    1.00000
 1101   71 THR  HG1    9.06598  -2.93919  42.50067 2S   135    0.00000
 1102   71 THR  CG2   10.61618  -3.43906  44.42567 2S   135    1.00000
 1103   71 THR  HG21  11.28824  -4.25485  44.08715 2S   135    0.00000
 1104   71 THR  HG22  10.79743  -3.23142  45.50039 2S   135    0.00000
 1105   71 THR  HG23  10.85195  -2.51473  43.85531 2S   135    0.00000
 1106   71 THR  C      8.82411  -5.17059  46.26172 2S   135    1.00000
 1107   71 THR  O      7.77577  -5.00247  46.88399 2S   135    1.00000
 1108   72 GLU  N     10.01536  -5.32455  46.88337 2S   136    1.00000
 1109   72 GLU  HN    10.85225  -5.47631  46.36222 2S   136    0.00000
 1110   72 GLU  CA    10.18662  -5.26933  48.31263 2S   136    1.00000
 1111   72 GLU  HA     9.58417  -6.05685  48.74074 2S   136    0.00000
 1112   72 GLU  CB    11.66895  -5.49539  48.69510 2S   136    1.00000
 1113   72 GLU  HB1   12.28731  -4.75303  48.14081 2S   136    0.00000
 1114   72 GLU  HB2   11.97858  -6.50535  48.34390 2S   136    0.00000
 1115   72 GLU  CG    11.99724  -5.35899  50.19626 2S   136    1.00000
 1116   72 GLU  HG1   11.56381  -4.42412  50.60580 2S   136    0.00000
 1117   72 GLU  HG2   13.10114  -5.29952  50.31013 2S   136    0.00000
 1118   72 GLU  CD    11.47939  -6.54843  51.00508 2S   136    1.00000
 1119   72 GLU  OE1   10.23629  -6.74106  51.07107 2S   136    1.00000
 1120   72 GLU  OE2   12.33172  -7.27457  51.58252 2S   136    1.00000
 1121   72 GLU  C      9.71393  -3.93935  48.86228 2S   136    1.00000
 1122   72 GLU  O     10.19036  -2.87987  48.45585 2S   136    1.00000
 1123   73 GLY  N      8.72773  -3.99175  49.78971 2S   137    1.00000
 1124   73 GLY  HN     8.36542  -4.87068  50.09463 2S   137    0.00000
 1125   73 GLY  CA     8.21177  -2.81761  50.45762 2S   137    1.00000
 1126   73 GLY  HA1    8.90327  -1.99905  50.31901 2S   137    0.00000
 1127   73 GLY  HA2    8.08922  -3.08186  51.49653 2S   137    0.00000
 1128   73 GLY  C      6.87558  -2.36314  49.94127 2S   137    1.00000
 1129   73 GLY  O      6.38923  -1.31457  50.35938 2S   137    1.00000
 1130   74 ALA  N      6.23385  -3.12122  49.02311 2S   138    1.00000
 1131   74 ALA  HN     6.60950  -3.98386  48.69215 2S   138    0.00000
 1132   74 ALA  CA     4.99131  -2.70241  48.41648 2S   138    1.00000
 1133   74 ALA  HA     5.01134  -1.62903  48.28214 2S   138    0.00000
 1134   74 ALA  CB     4.78711  -3.36046  47.04457 2S   138    1.00000
 1135   74 ALA  HB1    4.77907  -4.46753  47.14093 2S   138    0.00000
 1136   74 ALA  HB2    5.62613  -3.07911  46.37242 2S   138    0.00000
 1137   74 ALA  HB3    3.83688  -3.02994  46.57454 2S   138    0.00000
 1138   74 ALA  C      3.81957  -3.04827  49.29687 2S   138    1.00000
 1139   74 ALA  O      3.88833  -3.95606  50.12446 2S   138    1.00000
 1140   75 LEU  N      2.70659  -2.29805  49.13597 2S   139    1.00000
 1141   75 LEU  HN     2.67113  -1.55956  48.46494 2S   139    0.00000
 1142   75 LEU  CA     1.51924  -2.47923  49.93383 2S   139    1.00000
 1143   75 LEU  HA     1.73953  -3.10238  50.78876 2S   139    0.00000
 1144   75 LEU  CB     0.92332  -1.13682  50.41344 2S   139    1.00000
 1145   75 LEU  HB1   -0.01500  -1.33632  50.97742 2S   139    0.00000
 1146   75 LEU  HB2    0.67427  -0.51301  49.52758 2S   139    0.00000
 1147   75 LEU  CG     1.84784  -0.30844  51.33287 2S   139    1.00000
 1148   75 LEU  HG     2.80021  -0.09605  50.79226 2S   139    0.00000
 1149   75 LEU  CD1    1.18659   1.03963  51.67157 2S   139    1.00000
 1150   75 LEU  HD11   0.22538   0.87023  52.20053 2S   139    0.00000
 1151   75 LEU  HD12   0.97907   1.61435  50.74571 2S   139    0.00000
 1152   75 LEU  HD13   1.85250   1.64464  52.32258 2S   139    0.00000
 1153   75 LEU  CD2    2.20197  -1.07051  52.61860 2S   139    1.00000
 1154   75 LEU  HD21   2.74378  -2.00892  52.37932 2S   139    0.00000
 1155   75 LEU  HD22   1.27254  -1.32028  53.17348 2S   139    0.00000
 1156   75 LEU  HD23   2.85255  -0.44577  53.26603 2S   139    0.00000
 1157   75 LEU  C      0.48051  -3.18160  49.10904 2S   139    1.00000
 1158   75 LEU  O      0.27755  -2.85882  47.94073 2S   139    1.00000
 1159   76 ASN  N     -0.21711  -4.16771  49.72091 2S   140    1.00000
 1160   76 ASN  HN    -0.02195  -4.42070  50.66559 2S   140    0.00000
 1161   76 ASN  CA    -1.23691  -4.95835  49.06868 2S   140    1.00000
 1162   76 ASN  HA    -0.94286  -5.10911  48.03855 2S   140    0.00000
 1163   76 ASN  CB    -1.38155  -6.33336  49.76722 2S   140    1.00000
 1164   76 ASN  HB1   -1.84767  -6.21541  50.76765 2S   140    0.00000
 1165   76 ASN  HB2   -0.36050  -6.75100  49.91382 2S   140    0.00000
 1166   76 ASN  CG    -2.20682  -7.32438  48.93590 2S   140    1.00000
 1167   76 ASN  OD1   -3.12325  -6.96934  48.18972 2S   140    1.00000
 1168   76 ASN  ND2   -1.86427  -8.63314  49.08863 2S   140    1.00000
 1169   76 ASN  HD21  -2.36525  -9.32288  48.56826 2S   140    0.00000
 1170   76 ASN  HD22  -1.10700  -8.88500  49.68791 2S   140    0.00000
 1171   76 ASN  C     -2.54620  -4.20199  49.09407 2S   140    1.00000
 1172   76 ASN  O     -3.45586  -4.50572  49.86555 2S   140    1.00000
 1173   77 THR  N     -2.64814  -3.17556  48.22896 2S   141    1.00000
 1174   77 THR  HN    -1.88658  -2.95073  47.62394 2S   141    0.00000
 1175   77 THR  CA    -3.79783  -2.30710  48.16423 2S   141    1.00000
 1176   77 THR  HA    -4.63340  -2.81082  48.62296 2S   141    0.00000
 1177   77 THR  CB    -3.57475  -0.95988  48.85102 2S   141    1.00000
 1178   77 THR  HB    -4.42465  -0.26968  48.66848 2S   141    0.00000
 1179   77 THR  OG1   -2.41034  -0.33214  48.37577 2S   141    1.00000
 1180   77 THR  HG1   -2.24414   0.43234  48.92989 2S   141    0.00000
 1181   77 THR  CG2   -3.37835  -1.14948  50.35878 2S   141    1.00000
 1182   77 THR  HG21  -2.50477  -1.80414  50.56732 2S   141    0.00000
 1183   77 THR  HG22  -4.28684  -1.60446  50.80114 2S   141    0.00000
 1184   77 THR  HG23  -3.19245  -0.16530  50.84100 2S   141    0.00000
 1185   77 THR  C     -4.11521  -2.10144  46.70155 2S   141    1.00000
 1186   77 THR  O     -3.24267  -2.29121  45.85673 2S   141    1.00000
 1187   78 PRO  N     -5.32735  -1.71819  46.33345 2S   142    1.00000
 1188   78 PRO  CD    -6.50887  -1.72723  47.19984 2S   142    1.00000
 1189   78 PRO  HD1   -6.32705  -1.17512  48.14628 2S   142    0.00000
 1190   78 PRO  HD2   -6.79295  -2.77999  47.41893 2S   142    0.00000
 1191   78 PRO  CA    -5.65350  -1.38468  44.95993 2S   142    1.00000
 1192   78 PRO  HA    -5.26758  -2.14825  44.30029 2S   142    0.00000
 1193   78 PRO  CB    -7.18342  -1.32378  44.93480 2S   142    1.00000
 1194   78 PRO  HB1   -7.58998  -2.30926  44.62032 2S   142    0.00000
 1195   78 PRO  HB2   -7.57097  -0.54374  44.25591 2S   142    0.00000
 1196   78 PRO  CG    -7.59524  -1.03949  46.38089 2S   142    1.00000
 1197   78 PRO  HG1   -7.55552   0.05771  46.56142 2S   142    0.00000
 1198   78 PRO  HG2   -8.60816  -1.42461  46.60744 2S   142    0.00000
 1199   78 PRO  C     -5.04997  -0.05641  44.56010 2S   142    1.00000
 1200   78 PRO  O     -5.23203   0.94128  45.25803 2S   142    1.00000
 1201   79 LYS  N     -4.32212  -0.03402  43.42368 2S   143    1.00000
 1202   79 LYS  HN    -4.16716  -0.87731  42.90693 2S   143    0.00000
 1203   79 LYS  CA    -3.63356   1.13319  42.92966 2S   143    1.00000
 1204   79 LYS  HA    -3.47291   1.82044  43.74808 2S   143    0.00000
 1205   79 LYS  CB    -2.27211   0.77754  42.29389 2S   143    1.00000
 1206   79 LYS  HB1   -1.70438   1.71623  42.10803 2S   143    0.00000
 1207   79 LYS  HB2   -2.43433   0.26008  41.32276 2S   143    0.00000
 1208   79 LYS  CG    -1.41742  -0.15052  43.16730 2S   143    1.00000
 1209   79 LYS  HG1   -0.42240  -0.28614  42.68652 2S   143    0.00000
 1210   79 LYS  HG2   -1.89856  -1.15185  43.22928 2S   143    0.00000
 1211   79 LYS  CD    -1.21432   0.37890  44.58829 2S   143    1.00000
 1212   79 LYS  HD1   -2.19188   0.62320  45.05833 2S   143    0.00000
 1213   79 LYS  HD2   -0.63127   1.31839  44.52279 2S   143    0.00000
 1214   79 LYS  CE    -0.49732  -0.63870  45.46436 2S   143    1.00000
 1215   79 LYS  HE1    0.49379  -0.89937  45.05443 2S   143    0.00000
 1216   79 LYS  HE2   -1.07311  -1.57763  45.54528 2S   143    0.00000
 1217   79 LYS  NZ    -0.29586  -0.09661  46.81068 2S   143    1.00000
 1218   79 LYS  HZ1   -1.04067  -0.50319  47.42271 2S   143    0.00000
 1219   79 LYS  HZ2   -0.39328   0.93773  46.82673 2S   143    0.00000
 1220   79 LYS  HZ3    0.63262  -0.37651  47.18970 2S   143    0.00000
 1221   79 LYS  C     -4.48877   1.82828  41.91680 2S   143    1.00000
 1222   79 LYS  O     -4.11870   2.00058  40.75663 2S   143    1.00000
 1223   80 ASP  N     -5.67536   2.27577  42.36319 2S   144    1.00000
 1224   80 ASP  HN    -5.96597   2.10007  43.30242 2S   144    0.00000
 1225   80 ASP  CA    -6.67986   2.85673  41.50802 2S   144    1.00000
 1226   80 ASP  HA    -6.79509   2.22237  40.64161 2S   144    0.00000
 1227   80 ASP  CB    -8.03219   2.97193  42.23962 2S   144    1.00000
 1228   80 ASP  HB1   -8.81881   3.34248  41.54903 2S   144    0.00000
 1229   80 ASP  HB2   -7.90784   3.68422  43.07757 2S   144    0.00000
 1230   80 ASP  CG    -8.48342   1.62616  42.80918 2S   144    1.00000
 1231   80 ASP  OD1   -8.09743   0.57356  42.23691 2S   144    1.00000
 1232   80 ASP  OD2   -9.22511   1.63876  43.82678 2S   144    1.00000
 1233   80 ASP  C     -6.27711   4.22649  41.01965 2S   144    1.00000
 1234   80 ASP  O     -6.70336   4.65722  39.95131 2S   144    1.00000
 1235   81 HSD  N     -5.40636   4.93751  41.77149 2S   145    1.00000
 1236   81 HSD  HN    -5.06617   4.58691  42.64222 2S   145    0.00000
 1237   81 HSD  CA    -4.93381   6.25174  41.40827 2S   145    1.00000
 1238   81 HSD  HA    -5.80121   6.84203  41.15171 2S   145    0.00000
 1239   81 HSD  CB    -4.20351   6.94861  42.57828 2S   145    1.00000
 1240   81 HSD  HB1   -4.92771   7.09215  43.41082 2S   145    0.00000
 1241   81 HSD  HB2   -3.85064   7.95061  42.25897 2S   145    0.00000
 1242   81 HSD  ND1   -3.15969   5.11820  43.97047 2S   145    1.00000
 1243   81 HSD  HD1   -4.03064   4.75694  44.30977 2S   145    0.00000
 1244   81 HSD  CG    -3.03516   6.18927  43.12164 2S   145    1.00000
 1245   81 HSD  CE1   -1.92462   4.65882  44.23444 2S   145    1.00000
 1246   81 HSD  HE1   -1.74098   3.81756  44.90397 2S   145    0.00000
 1247   81 HSD  NE2   -1.01211   5.36200  43.60564 2S   145    1.00000
 1248   81 HSD  CD2   -1.70692   6.33255  42.91060 2S   145    1.00000
 1249   81 HSD  HD2   -1.17230   7.07034  42.32635 2S   145    0.00000
 1250   81 HSD  C     -4.03584   6.22873  40.19157 2S   145    1.00000
 1251   81 HSD  O     -3.90094   7.23452  39.50014 2S   145    1.00000
 1252   82 ILE  N     -3.42241   5.06956  39.87120 2S   146    1.00000
 1253   82 ILE  HN    -3.50491   4.25766  40.44599 2S   146    0.00000
 1254   82 ILE  CA    -2.63907   4.91577  38.66710 2S   146    1.00000
 1255   82 ILE  HA    -2.16843   5.86112  38.43515 2S   146    0.00000
 1256   82 ILE  CB    -1.55853   3.86203  38.83962 2S   146    1.00000
 1257   82 ILE  HB    -2.02420   2.89489  39.13743 2S   146    0.00000
 1258   82 ILE  CG2   -0.79144   3.65981  37.51654 2S   146    1.00000
 1259   82 ILE  HG21  -0.32074   4.61395  37.19912 2S   146    0.00000
 1260   82 ILE  HG22  -1.46203   3.29625  36.71277 2S   146    0.00000
 1261   82 ILE  HG23   0.00510   2.90228  37.64753 2S   146    0.00000
 1262   82 ILE  CG1   -0.59813   4.29469  39.97111 2S   146    1.00000
 1263   82 ILE  HG11  -1.17142   4.42198  40.91467 2S   146    0.00000
 1264   82 ILE  HG12  -0.14592   5.27664  39.70632 2S   146    0.00000
 1265   82 ILE  CD     0.51952   3.28252  40.22100 2S   146    1.00000
 1266   82 ILE  HD1    1.23753   3.27260  39.37362 2S   146    0.00000
 1267   82 ILE  HD2    0.09241   2.26289  40.33619 2S   146    0.00000
 1268   82 ILE  HD3    1.07522   3.55024  41.14219 2S   146    0.00000
 1269   82 ILE  C     -3.55176   4.59152  37.50947 2S   146    1.00000
 1270   82 ILE  O     -3.45536   5.21447  36.45196 2S   146    1.00000
 1271   83 GLY  N     -4.46827   3.60877  37.67495 2S   147    1.00000
 1272   83 GLY  HN    -4.53828   3.09740  38.52864 2S   147    0.00000
 1273   83 GLY  CA    -5.45245   3.29779  36.66106 2S   147    1.00000
 1274   83 GLY  HA1   -5.95166   4.21370  36.37754 2S   147    0.00000
 1275   83 GLY  HA2   -6.12233   2.55922  37.07307 2S   147    0.00000
 1276   83 GLY  C     -4.81954   2.69643  35.44891 2S   147    1.00000
 1277   83 GLY  O     -3.77058   2.06165  35.52782 2S   147    1.00000
 1278   84 THR  N     -5.47364   2.88784  34.29101 2S   148    1.00000
 1279   84 THR  HN    -6.32339   3.40693  34.24507 2S   148    0.00000
 1280   84 THR  CA    -5.05149   2.32072  33.04487 2S   148    1.00000
 1281   84 THR  HA    -4.01936   2.00912  33.08471 2S   148    0.00000
 1282   84 THR  CB    -5.90467   1.13144  32.63212 2S   148    1.00000
 1283   84 THR  HB    -5.61313   0.81888  31.61635 2S   148    0.00000
 1284   84 THR  OG1   -7.29383   1.43620  32.60014 2S   148    1.00000
 1285   84 THR  HG1   -7.37544   2.13900  31.94745 2S   148    0.00000
 1286   84 THR  CG2   -5.67148  -0.02603  33.62448 2S   148    1.00000
 1287   84 THR  HG21  -6.12038   0.22159  34.60931 2S   148    0.00000
 1288   84 THR  HG22  -4.58663  -0.21359  33.76748 2S   148    0.00000
 1289   84 THR  HG23  -6.14376  -0.95613  33.24936 2S   148    0.00000
 1290   84 THR  C     -5.15249   3.42300  32.03731 2S   148    1.00000
 1291   84 THR  O     -6.21843   4.02130  31.88802 2S   148    1.00000
 1292   85 ARG  N     -4.05154   3.69384  31.28997 2S   149    1.00000
 1293   85 ARG  HN    -3.17630   3.24351  31.44161 2S   149    0.00000
 1294   85 ARG  CA    -4.09997   4.54314  30.12575 2S   149    1.00000
 1295   85 ARG  HA    -4.68326   5.42188  30.38732 2S   149    0.00000
 1296   85 ARG  CB    -2.68144   5.06547  29.75746 2S   149    1.00000
 1297   85 ARG  HB1   -2.19165   5.47611  30.66983 2S   149    0.00000
 1298   85 ARG  HB2   -2.74913   5.91043  29.03938 2S   149    0.00000
 1299   85 ARG  CG    -1.74533   3.98590  29.21987 2S   149    1.00000
 1300   85 ARG  HG1   -2.31360   3.20798  28.68756 2S   149    0.00000
 1301   85 ARG  HG2   -1.27946   3.45024  30.06454 2S   149    0.00000
 1302   85 ARG  CD    -0.73485   4.52535  28.21903 2S   149    1.00000
 1303   85 ARG  HD1   -0.03222   5.21919  28.72153 2S   149    0.00000
 1304   85 ARG  HD2   -1.24698   5.04815  27.37900 2S   149    0.00000
 1305   85 ARG  NE     0.03539   3.36133  27.68617 2S   149    1.00000
 1306   85 ARG  HE     0.91313   3.13984  28.10937 2S   149    0.00000
 1307   85 ARG  CZ    -0.39679   2.60087  26.63963 2S   149    1.00000
 1308   85 ARG  NH1   -1.57862   2.85094  26.01948 2S   149    1.00000
 1309   85 ARG  HH11  -1.84064   2.33607  25.20661 2S   149    0.00000
 1310   85 ARG  HH12  -2.22669   3.48559  26.44336 2S   149    0.00000
 1311   85 ARG  NH2    0.38744   1.58361  26.19909 2S   149    1.00000
 1312   85 ARG  HH21   1.20397   1.33609  26.71832 2S   149    0.00000
 1313   85 ARG  HH22   0.13886   1.09159  25.36797 2S   149    0.00000
 1314   85 ARG  C     -4.81572   3.67017  29.02314 2S   149    1.00000
 1315   85 ARG  OT1   -4.29975   3.41721  27.90992 2S   149    1.00000
 1316   85 ARG  OT2   -5.92237   3.15598  29.32680 2S   149    0.00000
 1317   86 ALA  N      2.59490   4.99504  24.90043 3S   156    1.00000
 1318   86 ALA  HT1    2.52880   5.79997  25.55619 3S   156    0.00000
 1319   86 ALA  HT2    1.67140   4.82384  24.45496 3S   156    0.00000
 1320   86 ALA  HT3    3.30426   5.20616  24.16905 3S   156    0.00000
 1321   86 ALA  CA     3.02671   3.78900  25.64658 3S   156    1.00000
 1322   86 ALA  HA     2.27529   3.59428  26.39295 3S   156    0.00000
 1323   86 ALA  CB     3.15242   2.59323  24.68419 3S   156    1.00000
 1324   86 ALA  HB1    3.91054   2.79672  23.89812 3S   156    0.00000
 1325   86 ALA  HB2    2.17797   2.39694  24.18734 3S   156    0.00000
 1326   86 ALA  HB3    3.44719   1.67384  25.23441 3S   156    0.00000
 1327   86 ALA  C      4.32962   4.01270  26.34647 3S   156    1.00000
 1328   86 ALA  O      4.99861   5.02164  26.12893 3S   156    1.00000
 1329   87 ILE  N      4.70182   3.07172  27.24175 3S   157    1.00000
 1330   87 ILE  HN     4.12769   2.28140  27.44796 3S   157    0.00000
 1331   87 ILE  CA     5.93045   3.16043  27.99124 3S   157    1.00000
 1332   87 ILE  HA     6.56602   3.93043  27.57978 3S   157    0.00000
 1333   87 ILE  CB     5.71822   3.41698  29.48172 3S   157    1.00000
 1334   87 ILE  HB     5.01761   2.66053  29.90710 3S   157    0.00000
 1335   87 ILE  CG2    7.05501   3.30410  30.24578 3S   157    1.00000
 1336   87 ILE  HG21   7.83895   3.90979  29.74657 3S   157    0.00000
 1337   87 ILE  HG22   7.39113   2.24899  30.29203 3S   157    0.00000
 1338   87 ILE  HG23   6.93067   3.66435  31.28859 3S   157    0.00000
 1339   87 ILE  CG1    5.09871   4.81353  29.70496 3S   157    1.00000
 1340   87 ILE  HG11   5.44319   5.50341  28.90449 3S   157    0.00000
 1341   87 ILE  HG12   5.46638   5.21221  30.67696 3S   157    0.00000
 1342   87 ILE  CD     3.57329   4.79245  29.75348 3S   157    1.00000
 1343   87 ILE  HD1    3.23439   4.00661  30.46273 3S   157    0.00000
 1344   87 ILE  HD2    3.14376   4.56822  28.75746 3S   157    0.00000
 1345   87 ILE  HD3    3.18525   5.77612  30.09100 3S   157    0.00000
 1346   87 ILE  C      6.62406   1.85582  27.79438 3S   157    1.00000
 1347   87 ILE  O      6.06421   0.80646  28.08089 3S   157    1.00000
 1348   88 VAL  N      7.89149   1.87789  27.32129 3S   158    1.00000
 1349   88 VAL  HN     8.33366   2.73174  27.06141 3S   158    0.00000
 1350   88 VAL  CA     8.71093   0.69312  27.18273 3S   158    1.00000
 1351   88 VAL  HA     8.21865   0.02555  26.49021 3S   158    0.00000
 1352   88 VAL  CB    10.10497   1.02303  26.65992 3S   158    1.00000
 1353   88 VAL  HB    10.55488   1.82846  27.28501 3S   158    0.00000
 1354   88 VAL  CG1   11.02909  -0.21011  26.70870 3S   158    1.00000
 1355   88 VAL  HG11  10.53069  -1.08095  26.23392 3S   158    0.00000
 1356   88 VAL  HG12  11.28915  -0.46539  27.75751 3S   158    0.00000
 1357   88 VAL  HG13  11.97114   0.00203  26.16062 3S   158    0.00000
 1358   88 VAL  CG2    9.98884   1.54644  25.21607 3S   158    1.00000
 1359   88 VAL  HG21   9.36492   2.46201  25.17088 3S   158    0.00000
 1360   88 VAL  HG22   9.54265   0.76821  24.56099 3S   158    0.00000
 1361   88 VAL  HG23  11.00141   1.79274  24.82929 3S   158    0.00000
 1362   88 VAL  C      8.81425  -0.00199  28.51754 3S   158    1.00000
 1363   88 VAL  O      9.16403   0.61211  29.52372 3S   158    1.00000
 1364   89 LEU  N      8.46377  -1.30829  28.55067 3S   159    1.00000
 1365   89 LEU  HN     8.10440  -1.77494  27.74240 3S   159    0.00000
 1366   89 LEU  CA     8.54893  -2.10424  29.74647 3S   159    1.00000
 1367   89 LEU  HA     8.04724  -1.56919  30.54255 3S   159    0.00000
 1368   89 LEU  CB     7.87055  -3.46916  29.54775 3S   159    1.00000
 1369   89 LEU  HB1    8.43975  -4.08562  28.81852 3S   159    0.00000
 1370   89 LEU  HB2    6.87795  -3.26438  29.09615 3S   159    0.00000
 1371   89 LEU  CG     7.64109  -4.28350  30.83283 3S   159    1.00000
 1372   89 LEU  HG     7.58796  -3.58623  31.69715 3S   159    0.00000
 1373   89 LEU  CD1    6.29926  -5.02294  30.76549 3S   159    1.00000
 1374   89 LEU  HD11   6.28338  -5.71836  29.90047 3S   159    0.00000
 1375   89 LEU  HD12   5.45921  -4.30574  30.65890 3S   159    0.00000
 1376   89 LEU  HD13   6.15253  -5.59886  31.69785 3S   159    0.00000
 1377   89 LEU  CD2    8.78868  -5.26811  31.08547 3S   159    1.00000
 1378   89 LEU  HD21   9.71601  -4.72464  31.35497 3S   159    0.00000
 1379   89 LEU  HD22   8.97879  -5.84598  30.15889 3S   159    0.00000
 1380   89 LEU  HD23   8.52770  -5.97174  31.90295 3S   159    0.00000
 1381   89 LEU  C      9.99982  -2.29407  30.08935 3S   159    1.00000
 1382   89 LEU  O     10.72044  -3.02767  29.41465 3S   159    1.00000
 1383   90 GLN  N     10.46211  -1.56674  31.12657 3S   160    1.00000
 1384   90 GLN  HN     9.86032  -0.95859  31.64038 3S   160    0.00000
 1385   90 GLN  CA    11.85702  -1.51439  31.46889 3S   160    1.00000
 1386   90 GLN  HA    12.43657  -2.09145  30.76407 3S   160    0.00000
 1387   90 GLN  CB    12.38023  -0.06102  31.49121 3S   160    1.00000
 1388   90 GLN  HB1   11.99509   0.47852  32.38359 3S   160    0.00000
 1389   90 GLN  HB2   11.96008   0.44384  30.59157 3S   160    0.00000
 1390   90 GLN  CG    13.91419   0.03971  31.45111 3S   160    1.00000
 1391   90 GLN  HG1   14.31301  -0.64743  30.67474 3S   160    0.00000
 1392   90 GLN  HG2   14.33581  -0.25433  32.43412 3S   160    0.00000
 1393   90 GLN  CD    14.34538   1.47065  31.11027 3S   160    1.00000
 1394   90 GLN  OE1   13.54031   2.32276  30.72024 3S   160    1.00000
 1395   90 GLN  NE2   15.67718   1.72923  31.25601 3S   160    1.00000
 1396   90 GLN  HE21  16.02283   2.64112  31.03962 3S   160    0.00000
 1397   90 GLN  HE22  16.29143   1.00863  31.57375 3S   160    0.00000
 1398   90 GLN  C     11.99715  -2.13554  32.81355 3S   160    1.00000
 1399   90 GLN  O     11.26442  -1.78715  33.72781 3S   160    1.00000
 1400   91 LEU  N     12.92336  -3.10119  32.95918 3S   161    1.00000
 1401   91 LEU  HN    13.45851  -3.42349  32.18384 3S   161    0.00000
 1402   91 LEU  CA    13.16805  -3.76235  34.21588 3S   161    1.00000
 1403   91 LEU  HA    12.44838  -3.42383  34.94013 3S   161    0.00000
 1404   91 LEU  CB    13.09091  -5.29461  34.07666 3S   161    1.00000
 1405   91 LEU  HB1   13.37309  -5.76926  35.03967 3S   161    0.00000
 1406   91 LEU  HB2   13.81239  -5.62868  33.29848 3S   161    0.00000
 1407   91 LEU  CG    11.68581  -5.80600  33.70697 3S   161    1.00000
 1408   91 LEU  HG    11.36255  -5.30214  32.76787 3S   161    0.00000
 1409   91 LEU  CD1   11.72190  -7.31071  33.43536 3S   161    1.00000
 1410   91 LEU  HD11  11.88676  -7.85938  34.38133 3S   161    0.00000
 1411   91 LEU  HD12  12.55321  -7.54873  32.73898 3S   161    0.00000
 1412   91 LEU  HD13  10.76314  -7.65810  32.99885 3S   161    0.00000
 1413   91 LEU  CD2   10.66609  -5.48557  34.80838 3S   161    1.00000
 1414   91 LEU  HD21  10.59828  -4.39086  34.95790 3S   161    0.00000
 1415   91 LEU  HD22  10.98302  -5.95085  35.76641 3S   161    0.00000
 1416   91 LEU  HD23   9.66200  -5.86798  34.53204 3S   161    0.00000
 1417   91 LEU  C     14.54328  -3.39577  34.69747 3S   161    1.00000
 1418   91 LEU  O     15.39596  -3.06761  33.87089 3S   161    1.00000
 1419   92 PRO  N     14.83036  -3.44606  36.00577 3S   162    1.00000
 1420   92 PRO  CD    13.84395  -3.62723  37.07931 3S   162    1.00000
 1421   92 PRO  HD1   13.64122  -4.71310  37.20026 3S   162    0.00000
 1422   92 PRO  HD2   12.89604  -3.08074  36.88019 3S   162    0.00000
 1423   92 PRO  CA    16.14487  -3.11268  36.53121 3S   162    1.00000
 1424   92 PRO  HA    16.40558  -2.11278  36.21582 3S   162    0.00000
 1425   92 PRO  CB    16.00494  -3.25003  38.05685 3S   162    1.00000
 1426   92 PRO  HB1   16.60652  -2.48823  38.59320 3S   162    0.00000
 1427   92 PRO  HB2   16.30337  -4.26528  38.40128 3S   162    0.00000
 1428   92 PRO  CG    14.51012  -3.06374  38.33191 3S   162    1.00000
 1429   92 PRO  HG1   14.18616  -3.59248  39.25077 3S   162    0.00000
 1430   92 PRO  HG2   14.27737  -1.97977  38.41802 3S   162    0.00000
 1431   92 PRO  C     17.18519  -4.06102  36.00422 3S   162    1.00000
 1432   92 PRO  O     16.87782  -5.22038  35.74207 3S   162    1.00000
 1433   93 GLN  N     18.42468  -3.57849  35.81568 3S   163    1.00000
 1434   93 GLN  HN    18.63897  -2.62548  36.01020 3S   163    0.00000
 1435   93 GLN  CA    19.49334  -4.37146  35.26150 3S   163    1.00000
 1436   93 GLN  HA    19.16534  -4.76264  34.30749 3S   163    0.00000
 1437   93 GLN  CB    20.76576  -3.52067  35.06759 3S   163    1.00000
 1438   93 GLN  HB1   21.65268  -4.17499  34.92367 3S   163    0.00000
 1439   93 GLN  HB2   20.92714  -2.93060  35.99887 3S   163    0.00000
 1440   93 GLN  CG    20.67331  -2.52974  33.89160 3S   163    1.00000
 1441   93 GLN  HG1   21.53640  -1.83150  33.94032 3S   163    0.00000
 1442   93 GLN  HG2   19.73422  -1.94110  33.96289 3S   163    0.00000
 1443   93 GLN  CD    20.72427  -3.26587  32.54656 3S   163    1.00000
 1444   93 GLN  OE1   21.19727  -4.40230  32.43968 3S   163    1.00000
 1445   93 GLN  NE2   20.22433  -2.57171  31.48325 3S   163    1.00000
 1446   93 GLN  HE21  20.23055  -2.99284  30.57737 3S   163    0.00000
 1447   93 GLN  HE22  19.85361  -1.65426  31.61956 3S   163    0.00000
 1448   93 GLN  C     19.80976  -5.53217  36.17262 3S   163    1.00000
 1449   93 GLN  O     20.15416  -5.34101  37.33751 3S   163    1.00000
 1450   94 GLY  N     19.64726  -6.76937  35.64577 3S   164    1.00000
 1451   94 GLY  HN    19.39735  -6.88793  34.68686 3S   164    0.00000
 1452   94 GLY  CA    19.86276  -7.97812  36.41019 3S   164    1.00000
 1453   94 GLY  HA1   20.30543  -7.72736  37.36295 3S   164    0.00000
 1454   94 GLY  HA2   20.49519  -8.61526  35.81248 3S   164    0.00000
 1455   94 GLY  C     18.59746  -8.73233  36.70485 3S   164    1.00000
 1456   94 GLY  O     18.61074  -9.64666  37.52716 3S   164    1.00000
 1457   95 THR  N     17.46493  -8.39417  36.04693 3S   165    1.00000
 1458   95 THR  HN    17.43973  -7.64518  35.38983 3S   165    0.00000
 1459   95 THR  CA    16.20196  -9.06066  36.28842 3S   165    1.00000
 1460   95 THR  HA    16.09250  -9.21846  37.35442 3S   165    0.00000
 1461   95 THR  CB    15.02558  -8.24421  35.79735 3S   165    1.00000
 1462   95 THR  HB    15.09751  -8.05977  34.70075 3S   165    0.00000
 1463   95 THR  OG1   15.01359  -6.99644  36.46965 3S   165    1.00000
 1464   95 THR  HG1   15.74926  -6.48765  36.10469 3S   165    0.00000
 1465   95 THR  CG2   13.70223  -8.95176  36.11408 3S   165    1.00000
 1466   95 THR  HG21  13.73332  -9.40558  37.12322 3S   165    0.00000
 1467   95 THR  HG22  13.51620  -9.75022  35.36703 3S   165    0.00000
 1468   95 THR  HG23  12.86016  -8.22822  36.08691 3S   165    0.00000
 1469   95 THR  C     16.20689 -10.40033  35.60257 3S   165    1.00000
 1470   95 THR  O     16.44536 -10.49190  34.40036 3S   165    1.00000
 1471   96 THR  N     15.95289 -11.48150  36.37654 3S   166    1.00000
 1472   96 THR  HN    15.77242 -11.38680  37.35536 3S   166    0.00000
 1473   96 THR  CA    15.95651 -12.83825  35.87943 3S   166    1.00000
 1474   96 THR  HA    16.83724 -12.96992  35.26390 3S   166    0.00000
 1475   96 THR  CB    15.99242 -13.84787  37.01184 3S   166    1.00000
 1476   96 THR  HB    15.13940 -13.67702  37.70626 3S   166    0.00000
 1477   96 THR  OG1   17.20329 -13.69501  37.74369 3S   166    1.00000
 1478   96 THR  HG1   17.25821 -12.76730  37.98538 3S   166    0.00000
 1479   96 THR  CG2   15.92256 -15.28816  36.46809 3S   166    1.00000
 1480   96 THR  HG21  16.68100 -15.43370  35.66996 3S   166    0.00000
 1481   96 THR  HG22  14.91593 -15.49627  36.04856 3S   166    0.00000
 1482   96 THR  HG23  16.11337 -16.01750  37.28312 3S   166    0.00000
 1483   96 THR  C     14.73607 -13.06393  35.02148 3S   166    1.00000
 1484   96 THR  O     13.61095 -13.13746  35.51539 3S   166    1.00000
 1485   97 LEU  N     14.96354 -13.15839  33.69115 3S   167    1.00000
 1486   97 LEU  HN    15.88050 -13.04642  33.31708 3S   167    0.00000
 1487   97 LEU  CA    13.92793 -13.35025  32.71244 3S   167    1.00000
 1488   97 LEU  HA    12.98802 -13.09912  33.16557 3S   167    0.00000
 1489   97 LEU  CB    14.13917 -12.46642  31.46842 3S   167    1.00000
 1490   97 LEU  HB1   13.39804 -12.73590  30.68366 3S   167    0.00000
 1491   97 LEU  HB2   15.15772 -12.64913  31.06188 3S   167    0.00000
 1492   97 LEU  CG    13.98510 -10.96065  31.74431 3S   167    1.00000
 1493   97 LEU  HG    14.58764 -10.68763  32.64125 3S   167    0.00000
 1494   97 LEU  CD1   14.51656 -10.15032  30.55457 3S   167    1.00000
 1495   97 LEU  HD11  13.93911 -10.40476  29.64041 3S   167    0.00000
 1496   97 LEU  HD12  15.58693 -10.38828  30.37887 3S   167    0.00000
 1497   97 LEU  HD13  14.41656  -9.06346  30.75292 3S   167    0.00000
 1498   97 LEU  CD2   12.51993 -10.60945  32.02562 3S   167    1.00000
 1499   97 LEU  HD21  12.15263 -11.15829  32.91545 3S   167    0.00000
 1500   97 LEU  HD22  11.88812 -10.87556  31.15282 3S   167    0.00000
 1501   97 LEU  HD23  12.42368  -9.52510  32.21248 3S   167    0.00000
 1502   97 LEU  C     13.93801 -14.78744  32.25652 3S   167    1.00000
 1503   97 LEU  O     15.02022 -15.35159  32.08474 3S   167    1.00000
 1504   98 PRO  N     12.78923 -15.42903  32.02495 3S   168    1.00000
 1505   98 PRO  CD    11.45821 -14.93572  32.38861 3S   168    1.00000
 1506   98 PRO  HD1   11.05147 -14.33857  31.54390 3S   168    0.00000
 1507   98 PRO  HD2   11.46633 -14.32916  33.32028 3S   168    0.00000
 1508   98 PRO  CA    12.74659 -16.80356  31.55569 3S   168    1.00000
 1509   98 PRO  HA    13.40197 -17.40852  32.16517 3S   168    0.00000
 1510   98 PRO  CB    11.26646 -17.21909  31.67445 3S   168    1.00000
 1511   98 PRO  HB1   11.16308 -18.24498  32.08091 3S   168    0.00000
 1512   98 PRO  HB2   10.74256 -17.17147  30.69712 3S   168    0.00000
 1513   98 PRO  CG    10.63184 -16.19499  32.61665 3S   168    1.00000
 1514   98 PRO  HG1    9.55847 -16.03425  32.39747 3S   168    0.00000
 1515   98 PRO  HG2   10.75702 -16.52570  33.67098 3S   168    0.00000
 1516   98 PRO  C     13.20591 -16.89408  30.12523 3S   168    1.00000
 1517   98 PRO  O     13.43505 -15.87330  29.47638 3S   168    1.00000
 1518   99 LYS  N     13.32966 -18.13018  29.61108 3S   169    1.00000
 1519   99 LYS  HN    13.15846 -18.93962  30.16670 3S   169    0.00000
 1520   99 LYS  CA    13.75093 -18.37582  28.25767 3S   169    1.00000
 1521   99 LYS  HA    14.67565 -17.83939  28.09333 3S   169    0.00000
 1522   99 LYS  CB    13.96678 -19.88137  28.00643 3S   169    1.00000
 1523   99 LYS  HB1   14.32412 -20.04036  26.96519 3S   169    0.00000
 1524   99 LYS  HB2   12.99577 -20.41085  28.12951 3S   169    0.00000
 1525   99 LYS  CG    14.97687 -20.52209  28.96945 3S   169    1.00000
 1526   99 LYS  HG1   14.90894 -21.62827  28.86432 3S   169    0.00000
 1527   99 LYS  HG2   14.72221 -20.27489  30.02324 3S   169    0.00000
 1528   99 LYS  CD    16.42148 -20.09320  28.68562 3S   169    1.00000
 1529   99 LYS  HD1   16.51858 -18.99904  28.86305 3S   169    0.00000
 1530   99 LYS  HD2   16.64210 -20.29339  27.61275 3S   169    0.00000
 1531   99 LYS  CE    17.41680 -20.84993  29.56707 3S   169    1.00000
 1532   99 LYS  HE1   17.31004 -21.94414  29.40705 3S   169    0.00000
 1533   99 LYS  HE2   17.23466 -20.61223  30.63656 3S   169    0.00000
 1534   99 LYS  NZ    18.81121 -20.47612  29.24369 3S   169    1.00000
 1535   99 LYS  HZ1   18.94363 -19.45616  29.39733 3S   169    0.00000
 1536   99 LYS  HZ2   19.01126 -20.70580  28.24914 3S   169    0.00000
 1537   99 LYS  HZ3   19.46000 -21.00738  29.85896 3S   169    0.00000
 1538   99 LYS  C     12.71190 -17.86261  27.29284 3S   169    1.00000
 1539   99 LYS  O     11.52014 -18.12515  27.44669 3S   169    1.00000
 1540  100 GLY  N     13.15949 -17.07234  26.29213 3S   170    1.00000
 1541  100 GLY  HN    14.13135 -16.88147  26.17684 3S   170    0.00000
 1542  100 GLY  CA    12.27667 -16.50673  25.30176 3S   170    1.00000
 1543  100 GLY  HA1   11.43981 -17.17517  25.17483 3S   170    0.00000
 1544  100 GLY  HA2   12.85205 -16.38908  24.39639 3S   170    0.00000
 1545  100 GLY  C     11.72266 -15.16084  25.68139 3S   170    1.00000
 1546  100 GLY  O     10.74160 -14.71917  25.08651 3S   170    1.00000
 1547  101 PHE  N     12.32742 -14.46930  26.67358 3S   171    1.00000
 1548  101 PHE  HN    13.10691 -14.84357  27.17092 3S   171    0.00000
 1549  101 PHE  CA    11.86733 -13.16630  27.10683 3S   171    1.00000
 1550  101 PHE  HA    11.13641 -12.77524  26.41054 3S   171    0.00000
 1551  101 PHE  CB    11.29275 -13.17246  28.53793 3S   171    1.00000
 1552  101 PHE  HB1   11.12728 -12.13743  28.90560 3S   171    0.00000
 1553  101 PHE  HB2   11.98971 -13.69843  29.22473 3S   171    0.00000
 1554  101 PHE  CG     9.97321 -13.88025  28.57255 3S   171    1.00000
 1555  101 PHE  CD1    9.90683 -15.24295  28.89515 3S   171    1.00000
 1556  101 PHE  HD1   10.81567 -15.78716  29.08605 3S   171    0.00000
 1557  101 PHE  CE1    8.67699 -15.89677  28.98586 3S   171    1.00000
 1558  101 PHE  HE1    8.63671 -16.94173  29.25305 3S   171    0.00000
 1559  101 PHE  CZ     7.50024 -15.18664  28.74250 3S   171    1.00000
 1560  101 PHE  HZ     6.55328 -15.68420  28.86143 3S   171    0.00000
 1561  101 PHE  CD2    8.78333 -13.18314  28.30883 3S   171    1.00000
 1562  101 PHE  HD2    8.82552 -12.13416  28.06557 3S   171    0.00000
 1563  101 PHE  CE2    7.54656 -13.83317  28.38685 3S   171    1.00000
 1564  101 PHE  HE2    6.63337 -13.28765  28.19930 3S   171    0.00000
 1565  101 PHE  C     13.03738 -12.22707  27.10103 3S   171    1.00000
 1566  101 PHE  O     14.14463 -12.58813  27.49770 3S   171    1.00000
 1567  102 TYR  N     12.80593 -10.98658  26.61281 3S   172    1.00000
 1568  102 TYR  HN    11.89657 -10.69311  26.32711 3S   172    0.00000
 1569  102 TYR  CA    13.86688 -10.04021  26.37242 3S   172    1.00000
 1570  102 TYR  HA    14.71647 -10.27498  26.99954 3S   172    0.00000
 1571  102 TYR  CB    14.30361  -9.98248  24.87927 3S   172    1.00000
 1572  102 TYR  HB1   15.17400  -9.30189  24.76130 3S   172    0.00000
 1573  102 TYR  HB2   13.46884  -9.61489  24.24657 3S   172    0.00000
 1574  102 TYR  CG    14.69951 -11.34671  24.36004 3S   172    1.00000
 1575  102 TYR  CD1   13.72498 -12.24426  23.88113 3S   172    1.00000
 1576  102 TYR  HD1   12.68346 -11.95708  23.88317 3S   172    0.00000
 1577  102 TYR  CE1   14.08946 -13.52055  23.44014 3S   172    1.00000
 1578  102 TYR  HE1   13.34488 -14.21060  23.07930 3S   172    0.00000
 1579  102 TYR  CZ    15.43392 -13.89249  23.39764 3S   172    1.00000
 1580  102 TYR  OH    15.79216 -15.14621  22.86253 3S   172    1.00000
 1581  102 TYR  HH    16.74920 -15.17303  22.79841 3S   172    0.00000
 1582  102 TYR  CD2   16.04788 -11.74624  24.34093 3S   172    1.00000
 1583  102 TYR  HD2   16.81174 -11.07165  24.69634 3S   172    0.00000
 1584  102 TYR  CE2   16.41569 -13.00809  23.85406 3S   172    1.00000
 1585  102 TYR  HE2   17.45695 -13.29313  23.82619 3S   172    0.00000
 1586  102 TYR  C     13.34723  -8.69419  26.79967 3S   172    1.00000
 1587  102 TYR  O     12.17919  -8.37396  26.59229 3S   172    1.00000
 1588  103 ALA  N     14.21905  -7.89373  27.44171 3S   173    1.00000
 1589  103 ALA  HN    15.16393  -8.16193  27.60177 3S   173    0.00000
 1590  103 ALA  CA    13.93400  -6.56486  27.89929 3S   173    1.00000
 1591  103 ALA  HA    13.17563  -6.10665  27.27408 3S   173    0.00000
 1592  103 ALA  CB    13.48940  -6.56451  29.37586 3S   173    1.00000
 1593  103 ALA  HB1   14.31761  -6.94290  30.01085 3S   173    0.00000
 1594  103 ALA  HB2   12.61528  -7.23814  29.50688 3S   173    0.00000
 1595  103 ALA  HB3   13.20742  -5.54586  29.71480 3S   173    0.00000
 1596  103 ALA  C     15.30531  -5.87315  27.72876 3S   173    1.00000
 1597  103 ALA  OT1   15.86888  -5.34655  28.72068 3S   173    1.00000
 1598  103 ALA  OT2   15.86106  -5.94529  26.60130 3S   173    0.00000
 1599  104 ASN  N      3.13696   2.33320   5.64201 4S   48     1.00000
 1600  104 ASN  HT1    3.54081   1.66933   6.32578 4S   48     0.00000
 1601  104 ASN  HT2    3.81209   2.49577   4.86894 4S   48     0.00000
 1602  104 ASN  HT3    2.33568   1.85937   5.16373 4S   48     0.00000
 1603  104 ASN  CA     2.61683   3.63121   5.94712 4S   48     1.00000
 1604  104 ASN  HA     3.44869   4.16625   6.37601 4S   48     0.00000
 1605  104 ASN  CB     1.99221   4.35823   4.67274 4S   48     1.00000
 1606  104 ASN  HB1    2.51392   5.33915   4.62890 4S   48     0.00000
 1607  104 ASN  HB2    0.94493   4.64957   4.91254 4S   48     0.00000
 1608  104 ASN  CG     2.04309   3.63072   3.26336 4S   48     0.00000
 1609  104 ASN  OD1    1.65608   4.04679   2.18374 4S   48     0.00000
 1610  104 ASN  ND2    2.56630   2.39507   3.15534 4S   48     0.00000
 1611  104 ASN  HD21   1.99605   1.63958   3.47662 4S   48     0.00000
 1612  104 ASN  HD22   3.56674   2.34657   3.18548 4S   48     0.00000
 1613  104 ASN  C      1.60305   3.34997   6.97368 4S   48     1.00000
 1614  104 ASN  O      0.56204   2.75949   6.67939 4S   48     1.00000
 1615  105 THR  N      1.95191   3.72827   8.22052 4S   49     1.00000
 1616  105 THR  HN     2.83027   4.17757   8.36492 4S   49     0.00000
 1617  105 THR  CA     1.09219   3.66629   9.37741 4S   49     1.00000
 1618  105 THR  HA     1.64371   4.17780  10.15404 4S   49     0.00000
 1619  105 THR  CB    -0.22476   4.39913   9.16240 4S   49     1.00000
 1620  105 THR  HB    -0.85188   3.84368   8.43048 4S   49     0.00000
 1621  105 THR  OG1    0.02349   5.70230   8.64490 4S   49     1.00000
 1622  105 THR  HG1   -0.83837   6.09682   8.49259 4S   49     0.00000
 1623  105 THR  CG2   -0.99176   4.54779  10.48289 4S   49     1.00000
 1624  105 THR  HG21  -0.39371   5.13188  11.21372 4S   49     0.00000
 1625  105 THR  HG22  -1.21621   3.55248  10.91398 4S   49     0.00000
 1626  105 THR  HG23  -1.95510   5.06973  10.30312 4S   49     0.00000
 1627  105 THR  C      0.89186   2.24721   9.87203 4S   49     1.00000
 1628  105 THR  O      0.75491   2.00587  11.06276 4S   49     1.00000
 1629  106 ALA  N      0.91444   1.23120   8.98936 4S   50     1.00000
 1630  106 ALA  HN     0.98468   1.41690   8.01053 4S   50     0.00000
 1631  106 ALA  CA     0.76845  -0.15031   9.36594 4S   50     1.00000
 1632  106 ALA  HA    -0.04803  -0.21991  10.07146 4S   50     0.00000
 1633  106 ALA  CB     0.44129  -1.00946   8.13043 4S   50     1.00000
 1634  106 ALA  HB1    1.24016  -0.92633   7.36391 4S   50     0.00000
 1635  106 ALA  HB2   -0.51183  -0.66303   7.67436 4S   50     0.00000
 1636  106 ALA  HB3    0.32101  -2.07659   8.41316 4S   50     0.00000
 1637  106 ALA  C      2.01668  -0.69713  10.03191 4S   50     1.00000
 1638  106 ALA  O      2.05126  -1.85583  10.42960 4S   50     1.00000
 1639  107 SER  N      3.07489   0.13072  10.18432 4S   51     1.00000
 1640  107 SER  HN     3.00558   1.08472   9.90385 4S   51     0.00000
 1641  107 SER  CA     4.33381  -0.24934  10.78028 4S   51     1.00000
 1642  107 SER  HA     4.49341  -1.30821  10.62929 4S   51     0.00000
 1643  107 SER  CB     5.49801   0.56124  10.14143 4S   51     1.00000
 1644  107 SER  HB1    5.17572   1.61477  10.01215 4S   51     0.00000
 1645  107 SER  HB2    5.71862   0.13565   9.14310 4S   51     0.00000
 1646  107 SER  OG     6.71321   0.56904  10.88388 4S   51     1.00000
 1647  107 SER  HG1    7.23099  -0.18077  10.56705 4S   51     0.00000
 1648  107 SER  C      4.29294   0.01455  12.25602 4S   51     1.00000
 1649  107 SER  O      3.61571   0.92422  12.72521 4S   51     1.00000
 1650  108 TRP  N      5.09003  -0.76701  13.01593 4S   52     1.00000
 1651  108 TRP  HN     5.65081  -1.49016  12.60845 4S   52     0.00000
 1652  108 TRP  CA     5.24051  -0.59609  14.43535 4S   52     1.00000
 1653  108 TRP  HA     4.25651  -0.49340  14.85825 4S   52     0.00000
 1654  108 TRP  CB     5.95078  -1.80130  15.08660 4S   52     1.00000
 1655  108 TRP  HB1    6.33924  -1.53079  16.09155 4S   52     0.00000
 1656  108 TRP  HB2    6.81181  -2.09838  14.44667 4S   52     0.00000
 1657  108 TRP  CG     5.04229  -2.99946  15.25911 4S   52     1.00000
 1658  108 TRP  CD1    4.98154  -4.11837  14.48352 4S   52     1.00000
 1659  108 TRP  HD1    5.59026  -4.30112  13.61082 4S   52     0.00000
 1660  108 TRP  NE1    4.03886  -4.98549  14.97447 4S   52     1.00000
 1661  108 TRP  HE1    3.79970  -5.84654  14.57654 4S   52     0.00000
 1662  108 TRP  CE2    3.44501  -4.42812  16.07319 4S   52     1.00000
 1663  108 TRP  CD2    4.05160  -3.17321  16.29563 4S   52     1.00000
 1664  108 TRP  CE3    3.65367  -2.36734  17.36102 4S   52     1.00000
 1665  108 TRP  HE3    4.09311  -1.40086  17.55253 4S   52     0.00000
 1666  108 TRP  CZ3    2.63902  -2.85130  18.20238 4S   52     1.00000
 1667  108 TRP  HZ3    2.31495  -2.25568  19.04127 4S   52     0.00000
 1668  108 TRP  CZ2    2.43651  -4.90169  16.90060 4S   52     1.00000
 1669  108 TRP  HZ2    1.96638  -5.85914  16.73254 4S   52     0.00000
 1670  108 TRP  CH2    2.03899  -4.09897  17.97485 4S   52     1.00000
 1671  108 TRP  HH2    1.26252  -4.45300  18.63691 4S   52     0.00000
 1672  108 TRP  C      5.99095   0.65677  14.78746 4S   52     1.00000
 1673  108 TRP  O      5.75642   1.21334  15.85440 4S   52     1.00000
 1674  109 PHE  N      6.89935   1.13563  13.91328 4S   53     1.00000
 1675  109 PHE  HN     7.03805   0.72507  13.01374 4S   53     0.00000
 1676  109 PHE  CA     7.74767   2.25359  14.23295 4S   53     1.00000
 1677  109 PHE  HA     7.65723   2.48662  15.28007 4S   53     0.00000
 1678  109 PHE  CB     9.23407   1.98613  13.90574 4S   53     1.00000
 1679  109 PHE  HB1    9.86037   2.87345  14.13650 4S   53     0.00000
 1680  109 PHE  HB2    9.35325   1.72054  12.83374 4S   53     0.00000
 1681  109 PHE  CG     9.74811   0.84577  14.73098 4S   53     1.00000
 1682  109 PHE  CD1    9.69698  -0.46611  14.23304 4S   53     1.00000
 1683  109 PHE  HD1    9.26688  -0.65187  13.26084 4S   53     0.00000
 1684  109 PHE  CE1   10.19170  -1.53195  14.98712 4S   53     1.00000
 1685  109 PHE  HE1   10.16109  -2.53637  14.59506 4S   53     0.00000
 1686  109 PHE  CZ    10.73263  -1.29197  16.25192 4S   53     1.00000
 1687  109 PHE  HZ    11.10667  -2.11893  16.82080 4S   53     0.00000
 1688  109 PHE  CD2   10.29553   1.07499  16.00461 4S   53     1.00000
 1689  109 PHE  HD2   10.33955   2.07965  16.39836 4S   53     0.00000
 1690  109 PHE  CE2   10.78770   0.00873  16.76569 4S   53     1.00000
 1691  109 PHE  HE2   11.21551   0.19113  17.73987 4S   53     0.00000
 1692  109 PHE  C      7.30834   3.46117  13.46176 4S   53     1.00000
 1693  109 PHE  O      6.60479   3.37153  12.45695 4S   53     1.00000
 1694  110 THR  N      7.75350   4.65278  13.91818 4S   54     1.00000
 1695  110 THR  HN     8.24060   4.72851  14.78847 4S   54     0.00000
 1696  110 THR  CA     7.58137   5.88790  13.19379 4S   54     1.00000
 1697  110 THR  HA     6.55483   5.93774  12.85844 4S   54     0.00000
 1698  110 THR  CB     7.89065   7.12474  14.02336 4S   54     1.00000
 1699  110 THR  HB     7.80124   8.04987  13.41257 4S   54     0.00000
 1700  110 THR  OG1    9.20935   7.07630  14.54854 4S   54     1.00000
 1701  110 THR  HG1    9.79455   6.99449  13.78998 4S   54     0.00000
 1702  110 THR  CG2    6.88950   7.21909  15.18945 4S   54     1.00000
 1703  110 THR  HG21   6.94439   6.32187  15.84003 4S   54     0.00000
 1704  110 THR  HG22   5.85462   7.31021  14.79951 4S   54     0.00000
 1705  110 THR  HG23   7.11583   8.11199  15.81063 4S   54     0.00000
 1706  110 THR  C      8.47415   5.87757  11.97754 4S   54     1.00000
 1707  110 THR  O      9.34470   5.02400  11.81958 4S   54     1.00000
 1708  111 ALA  N      8.26360   6.84618  11.07440 4S   55     1.00000
 1709  111 ALA  HN     7.57327   7.55203  11.20507 4S   55     0.00000
 1710  111 ALA  CA     8.98281   6.87383   9.83675 4S   55     1.00000
 1711  111 ALA  HA     9.14490   5.85824   9.49993 4S   55     0.00000
 1712  111 ALA  CB     8.18874   7.61519   8.76238 4S   55     1.00000
 1713  111 ALA  HB1    8.25109   8.71313   8.90097 4S   55     0.00000
 1714  111 ALA  HB2    7.12130   7.34233   8.83829 4S   55     0.00000
 1715  111 ALA  HB3    8.55231   7.34018   7.75042 4S   55     0.00000
 1716  111 ALA  C     10.30435   7.57271   9.99198 4S   55     1.00000
 1717  111 ALA  O     10.46448   8.47588  10.81240 4S   55     1.00000
 1718  112 LEU  N     11.27682   7.16701   9.15652 4S   56     1.00000
 1719  112 LEU  HN    11.15732   6.33960   8.60533 4S   56     0.00000
 1720  112 LEU  CA    12.48764   7.89739   8.90984 4S   56     1.00000
 1721  112 LEU  HA    12.71654   8.51399   9.76380 4S   56     0.00000
 1722  112 LEU  CB    13.65245   6.95187   8.54886 4S   56     1.00000
 1723  112 LEU  HB1   14.34492   7.45302   7.83592 4S   56     0.00000
 1724  112 LEU  HB2   13.23537   6.05236   8.04318 4S   56     0.00000
 1725  112 LEU  CG    14.52066   6.48218   9.72884 4S   56     1.00000
 1726  112 LEU  HG    13.90760   5.85758  10.41566 4S   56     0.00000
 1727  112 LEU  CD1   15.66262   5.61793   9.17365 4S   56     1.00000
 1728  112 LEU  HD11  16.27651   6.21929   8.46900 4S   56     0.00000
 1729  112 LEU  HD12  15.25112   4.74926   8.61989 4S   56     0.00000
 1730  112 LEU  HD13  16.31110   5.25188   9.99534 4S   56     0.00000
 1731  112 LEU  CD2   15.07984   7.66750  10.53043 4S   56     1.00000
 1732  112 LEU  HD21  14.26953   8.16998  11.09917 4S   56     0.00000
 1733  112 LEU  HD22  15.54136   8.40277   9.83678 4S   56     0.00000
 1734  112 LEU  HD23  15.84643   7.31956  11.25293 4S   56     0.00000
 1735  112 LEU  C     12.25283   8.80228   7.72910 4S   56     1.00000
 1736  112 LEU  O     12.04555   8.34564   6.61141 4S   56     1.00000
 1737  113 THR  N     12.29088  10.13008   7.94997 4S   57     1.00000
 1738  113 THR  HN    12.50825  10.49894   8.84896 4S   57     0.00000
 1739  113 THR  CA    11.97265  11.09768   6.92309 4S   57     1.00000
 1740  113 THR  HA    11.29030  10.64972   6.21192 4S   57     0.00000
 1741  113 THR  CB    11.30549  12.32675   7.50298 4S   57     1.00000
 1742  113 THR  HB    11.97162  12.81517   8.25027 4S   57     0.00000
 1743  113 THR  OG1   10.10273  11.93469   8.14088 4S   57     1.00000
 1744  113 THR  HG1   10.36690  11.61944   9.01464 4S   57     0.00000
 1745  113 THR  CG2   10.91320  13.33573   6.41864 4S   57     1.00000
 1746  113 THR  HG21  10.32837  12.82920   5.62141 4S   57     0.00000
 1747  113 THR  HG22  11.81376  13.80779   5.97713 4S   57     0.00000
 1748  113 THR  HG23  10.28296  14.13584   6.86022 4S   57     0.00000
 1749  113 THR  C     13.23575  11.47613   6.19855 4S   57     1.00000
 1750  113 THR  O     14.25821  11.77208   6.81298 4S   57     1.00000
 1751  114 GLN  N     13.17702  11.45804   4.85108 4S   58     1.00000
 1752  114 GLN  HN    12.33227  11.20044   4.37755 4S   58     0.00000
 1753  114 GLN  CA    14.27463  11.77543   3.98326 4S   58     1.00000
 1754  114 GLN  HA    15.20576  11.59165   4.50019 4S   58     0.00000
 1755  114 GLN  CB    14.23588  10.91524   2.70143 4S   58     1.00000
 1756  114 GLN  HB1   13.25787  11.04923   2.19849 4S   58     0.00000
 1757  114 GLN  HB2   14.29461   9.84719   2.99918 4S   58     0.00000
 1758  114 GLN  CG    15.37009  11.22563   1.71640 4S   58     1.00000
 1759  114 GLN  HG1   16.35280  11.01780   2.18963 4S   58     0.00000
 1760  114 GLN  HG2   15.32710  12.29813   1.44429 4S   58     0.00000
 1761  114 GLN  CD    15.22525  10.38305   0.44730 4S   58     1.00000
 1762  114 GLN  OE1   14.51734   9.37152   0.40867 4S   58     1.00000
 1763  114 GLN  NE2   15.94002  10.82854  -0.62389 4S   58     1.00000
 1764  114 GLN  HE21  16.06217  10.23788  -1.42121 4S   58     0.00000
 1765  114 GLN  HE22  16.45997  11.68040  -0.54534 4S   58     0.00000
 1766  114 GLN  C     14.19356  13.23337   3.62146 4S   58     1.00000
 1767  114 GLN  O     13.42624  13.64672   2.75748 4S   58     1.00000
 1768  115 HSD  N     15.01444  14.06492   4.28536 4S   59     1.00000
 1769  115 HSD  HN    15.59484  13.73071   5.02745 4S   59     0.00000
 1770  115 HSD  CA    15.04974  15.48731   4.04501 4S   59     1.00000
 1771  115 HSD  HA    14.05811  15.82242   3.77177 4S   59     0.00000
 1772  115 HSD  CB    15.49950  16.25616   5.30354 4S   59     1.00000
 1773  115 HSD  HB1   15.48448  17.34869   5.10623 4S   59     0.00000
 1774  115 HSD  HB2   16.53210  15.95841   5.58200 4S   59     0.00000
 1775  115 HSD  ND1   14.79324  14.89947   7.31951 4S   59     1.00000
 1776  115 HSD  HD1   15.50247  14.19645   7.22986 4S   59     0.00000
 1777  115 HSD  CG    14.61966  15.97989   6.48118 4S   59     1.00000
 1778  115 HSD  CE1   13.78796  14.93484   8.21826 4S   59     1.00000
 1779  115 HSD  HE1   13.69413  14.20673   9.02314 4S   59     0.00000
 1780  115 HSD  NE2   12.97479  15.94893   8.00627 4S   59     1.00000
 1781  115 HSD  CD2   13.50603  16.62003   6.92226 4S   59     1.00000
 1782  115 HSD  HD2   13.03104  17.52707   6.56689 4S   59     0.00000
 1783  115 HSD  C     15.97747  15.84586   2.90962 4S   59     1.00000
 1784  115 HSD  O     15.93915  16.97682   2.42942 4S   59     1.00000
 1785  116 GLY  N     16.82435  14.89596   2.44387 4S   60     1.00000
 1786  116 GLY  HN    16.82878  13.97531   2.82766 4S   60     0.00000
 1787  116 GLY  CA    17.78558  15.15607   1.39375 4S   60     1.00000
 1788  116 GLY  HA1   18.74420  14.81478   1.75014 4S   60     0.00000
 1789  116 GLY  HA2   17.78624  16.20582   1.13848 4S   60     0.00000
 1790  116 GLY  C     17.45080  14.38692   0.15527 4S   60     1.00000
 1791  116 GLY  O     16.37033  13.82459   0.00655 4S   60     1.00000
 1792  117 LYS  N     18.40207  14.36498  -0.79786 4S   61     1.00000
 1793  117 LYS  HN    19.25576  14.86667  -0.68649 4S   61     0.00000
 1794  117 LYS  CA    18.22676  13.71138  -2.06952 4S   61     1.00000
 1795  117 LYS  HA    17.18549  13.75066  -2.35895 4S   61     0.00000
 1796  117 LYS  CB    19.07737  14.38221  -3.15624 4S   61     1.00000
 1797  117 LYS  HB1   18.96056  13.80008  -4.09335 4S   61     0.00000
 1798  117 LYS  HB2   20.15232  14.35845  -2.87034 4S   61     0.00000
 1799  117 LYS  CG    18.68157  15.84076  -3.42378 4S   61     1.00000
 1800  117 LYS  HG1   18.90445  16.44621  -2.51636 4S   61     0.00000
 1801  117 LYS  HG2   17.58741  15.91106  -3.61406 4S   61     0.00000
 1802  117 LYS  CD    19.43579  16.44076  -4.61892 4S   61     1.00000
 1803  117 LYS  HD1   20.48911  16.08526  -4.61282 4S   61     0.00000
 1804  117 LYS  HD2   19.45747  17.54751  -4.49011 4S   61     0.00000
 1805  117 LYS  CE    18.76790  16.14227  -5.97189 4S   61     1.00000
 1806  117 LYS  HE1   19.22333  16.77089  -6.76445 4S   61     0.00000
 1807  117 LYS  HE2   17.68036  16.35980  -5.90467 4S   61     0.00000
 1808  117 LYS  NZ    18.91976  14.72538  -6.38737 4S   61     1.00000
 1809  117 LYS  HZ1   18.48970  14.10896  -5.66705 4S   61     0.00000
 1810  117 LYS  HZ2   19.92932  14.49150  -6.47345 4S   61     0.00000
 1811  117 LYS  HZ3   18.44400  14.57132  -7.29796 4S   61     0.00000
 1812  117 LYS  C     18.62333  12.26438  -2.02296 4S   61     1.00000
 1813  117 LYS  O     18.08506  11.45594  -2.77699 4S   61     1.00000
 1814  118 GLU  N     19.57552  11.89350  -1.14018 4S   62     1.00000
 1815  118 GLU  HN    20.00245  12.53985  -0.51427 4S   62     0.00000
 1816  118 GLU  CA    20.06879  10.54291  -1.07045 4S   62     1.00000
 1817  118 GLU  HA    20.30505  10.21156  -2.07205 4S   62     0.00000
 1818  118 GLU  CB    21.33739  10.42864  -0.20797 4S   62     1.00000
 1819  118 GLU  HB1   21.66123   9.36451  -0.17823 4S   62     0.00000
 1820  118 GLU  HB2   21.10250  10.74398   0.83515 4S   62     0.00000
 1821  118 GLU  CG    22.45888  11.29309  -0.81783 4S   62     1.00000
 1822  118 GLU  HG1   22.22102  12.36887  -0.65828 4S   62     0.00000
 1823  118 GLU  HG2   22.53255  11.09285  -1.90564 4S   62     0.00000
 1824  118 GLU  CD    23.85152  10.94253  -0.31126 4S   62     1.00000
 1825  118 GLU  OE1   24.03250   9.81030   0.21303 4S   62     1.00000
 1826  118 GLU  OE2   24.75096  11.82196  -0.41433 4S   62     1.00000
 1827  118 GLU  C     19.03496   9.64089  -0.48428 4S   62     1.00000
 1828  118 GLU  O     18.43472   9.95394   0.53977 4S   62     1.00000
 1829  119 ASP  N     18.81342   8.47802  -1.12764 4S   63     1.00000
 1830  119 ASP  HN    19.26569   8.26637  -1.98986 4S   63     0.00000
 1831  119 ASP  CA    17.89378   7.47984  -0.65229 4S   63     1.00000
 1832  119 ASP  HA    16.94679   7.95746  -0.43832 4S   63     0.00000
 1833  119 ASP  CB    17.68044   6.33242  -1.67327 4S   63     1.00000
 1834  119 ASP  HB1   17.04534   5.53520  -1.22987 4S   63     0.00000
 1835  119 ASP  HB2   18.66405   5.89129  -1.94398 4S   63     0.00000
 1836  119 ASP  CG    16.99280   6.82267  -2.95150 4S   63     1.00000
 1837  119 ASP  OD1   16.68109   8.03726  -3.06215 4S   63     1.00000
 1838  119 ASP  OD2   16.76136   5.96250  -3.84229 4S   63     1.00000
 1839  119 ASP  C     18.43549   6.89555   0.62537 4S   63     1.00000
 1840  119 ASP  O     19.59778   7.08411   0.98878 4S   63     1.00000
 1841  120 LEU  N     17.57521   6.17613   1.36182 4S   64     1.00000
 1842  120 LEU  HN    16.62611   6.04399   1.08783 4S   64     0.00000
 1843  120 LEU  CA    17.97367   5.56870   2.59698 4S   64     1.00000
 1844  120 LEU  HA    18.58386   6.26855   3.14268 4S   64     0.00000
 1845  120 LEU  CB    16.73876   5.20168   3.43503 4S   64     1.00000
 1846  120 LEU  HB1   16.08025   4.53520   2.83663 4S   64     0.00000
 1847  120 LEU  HB2   16.16718   6.13382   3.63456 4S   64     0.00000
 1848  120 LEU  CG    17.03221   4.53998   4.79060 4S   64     1.00000
 1849  120 LEU  HG    17.66248   3.64143   4.62200 4S   64     0.00000
 1850  120 LEU  CD1   17.80452   5.47398   5.72984 4S   64     1.00000
 1851  120 LEU  HD11  17.20595   6.38644   5.92249 4S   64     0.00000
 1852  120 LEU  HD12  18.77356   5.76768   5.27855 4S   64     0.00000
 1853  120 LEU  HD13  18.00321   4.96646   6.69455 4S   64     0.00000
 1854  120 LEU  CD2   15.72381   4.06431   5.42669 4S   64     1.00000
 1855  120 LEU  HD21  15.20962   3.35133   4.74652 4S   64     0.00000
 1856  120 LEU  HD22  15.05947   4.93429   5.60635 4S   64     0.00000
 1857  120 LEU  HD23  15.92798   3.55751   6.39152 4S   64     0.00000
 1858  120 LEU  C     18.77818   4.33430   2.30993 4S   64     1.00000
 1859  120 LEU  O     18.44513   3.57856   1.40337 4S   64     1.00000
 1860  121 LYS  N     19.86799   4.11695   3.07772 4S   65     1.00000
 1861  121 LYS  HN    20.19190   4.79113   3.73703 4S   65     0.00000
 1862  121 LYS  CA    20.58085   2.87000   3.04722 4S   65     1.00000
 1863  121 LYS  HA    19.86543   2.06315   3.03974 4S   65     0.00000
 1864  121 LYS  CB    21.51208   2.72478   1.82843 4S   65     1.00000
 1865  121 LYS  HB1   20.92578   2.96875   0.91365 4S   65     0.00000
 1866  121 LYS  HB2   21.83999   1.66605   1.74365 4S   65     0.00000
 1867  121 LYS  CG    22.74704   3.63041   1.85609 4S   65     1.00000
 1868  121 LYS  HG1   23.32852   3.44935   2.78766 4S   65     0.00000
 1869  121 LYS  HG2   22.42075   4.69320   1.85141 4S   65     0.00000
 1870  121 LYS  CD    23.66907   3.35705   0.66647 4S   65     1.00000
 1871  121 LYS  HD1   23.11777   3.55892  -0.27767 4S   65     0.00000
 1872  121 LYS  HD2   23.93788   2.27505   0.67571 4S   65     0.00000
 1873  121 LYS  CE    24.95844   4.18002   0.71619 4S   65     1.00000
 1874  121 LYS  HE1   25.59692   3.93886  -0.15868 4S   65     0.00000
 1875  121 LYS  HE2   25.51171   3.95929   1.65421 4S   65     0.00000
 1876  121 LYS  NZ    24.67133   5.63470   0.68925 4S   65     1.00000
 1877  121 LYS  HZ1   24.08542   5.89028   1.50977 4S   65     0.00000
 1878  121 LYS  HZ2   24.16021   5.87577  -0.18362 4S   65     0.00000
 1879  121 LYS  HZ3   25.56465   6.16517   0.72513 4S   65     0.00000
 1880  121 LYS  C     21.37544   2.75512   4.31105 4S   65     1.00000
 1881  121 LYS  O     21.65267   3.75213   4.97804 4S   65     1.00000
 1882  122 PHE  N     21.76652   1.51256   4.66518 4S   66     1.00000
 1883  122 PHE  HN    21.50112   0.70572   4.14206 4S   66     0.00000
 1884  122 PHE  CA    22.57964   1.27516   5.82989 4S   66     1.00000
 1885  122 PHE  HA    22.98574   2.21075   6.17371 4S   66     0.00000
 1886  122 PHE  CB    21.78499   0.59818   6.96785 4S   66     1.00000
 1887  122 PHE  HB1   22.46018   0.27332   7.78720 4S   66     0.00000
 1888  122 PHE  HB2   21.23333  -0.28506   6.58123 4S   66     0.00000
 1889  122 PHE  CG    20.79422   1.56108   7.55505 4S   66     1.00000
 1890  122 PHE  CD1   21.20374   2.49975   8.51528 4S   66     1.00000
 1891  122 PHE  HD1   22.23881   2.54267   8.82158 4S   66     0.00000
 1892  122 PHE  CE1   20.27358   3.36731   9.09629 4S   66     1.00000
 1893  122 PHE  HE1   20.59954   4.07025   9.84474 4S   66     0.00000
 1894  122 PHE  CZ    18.92494   3.30811   8.72462 4S   66     1.00000
 1895  122 PHE  HZ    18.20807   3.97850   9.17340 4S   66     0.00000
 1896  122 PHE  CD2   19.44058   1.51654   7.18110 4S   66     1.00000
 1897  122 PHE  HD2   19.11498   0.79703   6.44732 4S   66     0.00000
 1898  122 PHE  CE2   18.50682   2.37648   7.76827 4S   66     1.00000
 1899  122 PHE  HE2   17.46694   2.31927   7.48459 4S   66     0.00000
 1900  122 PHE  C     23.71686   0.36081   5.44995 4S   66     1.00000
 1901  122 PHE  O     23.55116  -0.48949   4.57359 4S   66     1.00000
 1902  123 PRO  N     24.88301   0.46226   6.09690 4S   67     1.00000
 1903  123 PRO  CD    25.36596   1.67119   6.76893 4S   67     1.00000
 1904  123 PRO  HD1   25.00599   1.67438   7.82083 4S   67     0.00000
 1905  123 PRO  HD2   25.03254   2.59281   6.24320 4S   67     0.00000
 1906  123 PRO  CA    25.91523  -0.55553   6.00840 4S   67     1.00000
 1907  123 PRO  HA    26.11683  -0.77692   4.97082 4S   67     0.00000
 1908  123 PRO  CB    27.12163   0.04085   6.75196 4S   67     1.00000
 1909  123 PRO  HB1   28.07945  -0.22874   6.26317 4S   67     0.00000
 1910  123 PRO  HB2   27.14843  -0.29093   7.81257 4S   67     0.00000
 1911  123 PRO  CG    26.88614   1.55317   6.71514 4S   67     1.00000
 1912  123 PRO  HG1   27.37997   2.07734   7.55682 4S   67     0.00000
 1913  123 PRO  HG2   27.25352   1.96111   5.74801 4S   67     0.00000
 1914  123 PRO  C     25.43556  -1.80098   6.69233 4S   67     1.00000
 1915  123 PRO  O     24.58006  -1.71196   7.57325 4S   67     1.00000
 1916  124 ARG  N     25.97192  -2.97147   6.29453 4S   68     1.00000
 1917  124 ARG  HN    26.66429  -3.00712   5.57771 4S   68     0.00000
 1918  124 ARG  CA    25.53699  -4.24200   6.81388 4S   68     1.00000
 1919  124 ARG  HA    24.48404  -4.34718   6.58934 4S   68     0.00000
 1920  124 ARG  CB    26.30751  -5.39806   6.15089 4S   68     1.00000
 1921  124 ARG  HB1   27.39868  -5.24635   6.31097 4S   68     0.00000
 1922  124 ARG  HB2   26.12258  -5.36071   5.05377 4S   68     0.00000
 1923  124 ARG  CG    25.91403  -6.78517   6.67534 4S   68     1.00000
 1924  124 ARG  HG1   24.83468  -6.96638   6.47762 4S   68     0.00000
 1925  124 ARG  HG2   26.06759  -6.81434   7.77755 4S   68     0.00000
 1926  124 ARG  CD    26.76348  -7.90412   6.08023 4S   68     1.00000
 1927  124 ARG  HD1   26.52338  -8.86914   6.57649 4S   68     0.00000
 1928  124 ARG  HD2   27.84536  -7.66988   6.19058 4S   68     0.00000
 1929  124 ARG  NE    26.44901  -8.01816   4.62537 4S   68     1.00000
 1930  124 ARG  HE    25.85079  -7.34155   4.19868 4S   68     0.00000
 1931  124 ARG  CZ    26.96194  -9.02133   3.86286 4S   68     1.00000
 1932  124 ARG  NH1   26.64530  -9.08413   2.54493 4S   68     1.00000
 1933  124 ARG  HH11  26.04107  -8.39421   2.15111 4S   68     0.00000
 1934  124 ARG  HH12  27.01659  -9.81998   1.98310 4S   68     0.00000
 1935  124 ARG  NH2   27.78322  -9.95794   4.40452 4S   68     1.00000
 1936  124 ARG  HH21  28.01097  -9.90734   5.37548 4S   68     0.00000
 1937  124 ARG  HH22  28.14824 -10.69027   3.83447 4S   68     0.00000
 1938  124 ARG  C     25.72616  -4.30054   8.31209 4S   68     1.00000
 1939  124 ARG  O     26.80348  -3.99997   8.82422 4S   68     1.00000
 1940  125 GLY  N     24.64067  -4.65296   9.03872 4S   69     1.00000
 1941  125 GLY  HN    23.78015  -4.89609   8.59507 4S   69     0.00000
 1942  125 GLY  CA    24.66919  -4.75356  10.47932 4S   69     1.00000
 1943  125 GLY  HA1   25.69122  -4.75387  10.82602 4S   69     0.00000
 1944  125 GLY  HA2   24.15946  -5.66655  10.73555 4S   69     0.00000
 1945  125 GLY  C     23.94585  -3.62498  11.15676 4S   69     1.00000
 1946  125 GLY  O     23.73992  -3.67926  12.36768 4S   69     1.00000
 1947  126 GLN  N     23.55943  -2.56464  10.40958 4S   70     1.00000
 1948  126 GLN  HN    23.72757  -2.52693   9.42620 4S   70     0.00000
 1949  126 GLN  CA    22.94677  -1.38693  10.97808 4S   70     1.00000
 1950  126 GLN  HA    22.84216  -1.49608  12.04825 4S   70     0.00000
 1951  126 GLN  CB    23.77744  -0.11449  10.67987 4S   70     1.00000
 1952  126 GLN  HB1   23.25775   0.76471  11.10878 4S   70     0.00000
 1953  126 GLN  HB2   23.84445   0.03356   9.57996 4S   70     0.00000
 1954  126 GLN  CG    25.20083  -0.19153  11.26675 4S   70     1.00000
 1955  126 GLN  HG1   25.70280  -1.11377  10.90951 4S   70     0.00000
 1956  126 GLN  HG2   25.14785  -0.21247  12.37641 4S   70     0.00000
 1957  126 GLN  CD    26.02760   1.02241  10.84741 4S   70     1.00000
 1958  126 GLN  OE1   25.61399   2.15664  11.07155 4S   70     1.00000
 1959  126 GLN  NE2   27.22197   0.78048  10.24107 4S   70     1.00000
 1960  126 GLN  HE21  27.79469   1.54891   9.95638 4S   70     0.00000
 1961  126 GLN  HE22  27.50140  -0.16254  10.07115 4S   70     0.00000
 1962  126 GLN  C     21.56868  -1.21918  10.40136 4S   70     1.00000
 1963  126 GLN  O     21.21200  -1.85287   9.40921 4S   70     1.00000
 1964  127 GLY  N     20.75682  -0.33770  11.03094 4S   71     1.00000
 1965  127 GLY  HN    21.03189   0.10189  11.88577 4S   71     0.00000
 1966  127 GLY  CA    19.50975   0.11421  10.46921 4S   71     1.00000
 1967  127 GLY  HA1   19.46609  -0.14056   9.42214 4S   71     0.00000
 1968  127 GLY  HA2   19.46017   1.18029  10.63321 4S   71     0.00000
 1969  127 GLY  C     18.32072  -0.48218  11.12828 4S   71     1.00000
 1970  127 GLY  O     17.21830  -0.00340  10.92261 4S   71     1.00000
 1971  128 VAL  N     18.46719  -1.54044  11.94312 4S   72     1.00000
 1972  128 VAL  HN    19.35623  -1.95120  12.11960 4S   72     0.00000
 1973  128 VAL  CA    17.32762  -2.15267  12.58738 4S   72     1.00000
 1974  128 VAL  HA    16.54418  -2.24641  11.85422 4S   72     0.00000
 1975  128 VAL  CB    17.64339  -3.55108  13.07441 4S   72     1.00000
 1976  128 VAL  HB    18.55758  -3.52547  13.70870 4S   72     0.00000
 1977  128 VAL  CG1   16.47590  -4.12034  13.89755 4S   72     1.00000
 1978  128 VAL  HG11  15.51797  -4.00532  13.34900 4S   72     0.00000
 1979  128 VAL  HG12  16.40316  -3.60916  14.88001 4S   72     0.00000
 1980  128 VAL  HG13  16.64632  -5.19654  14.08441 4S   72     0.00000
 1981  128 VAL  CG2   17.92280  -4.44694  11.85391 4S   72     1.00000
 1982  128 VAL  HG21  18.78433  -4.06814  11.26713 4S   72     0.00000
 1983  128 VAL  HG22  17.02772  -4.50039  11.19913 4S   72     0.00000
 1984  128 VAL  HG23  18.16429  -5.47316  12.20005 4S   72     0.00000
 1985  128 VAL  C     16.88589  -1.27111  13.74377 4S   72     1.00000
 1986  128 VAL  O     17.73251  -0.91595  14.56586 4S   72     1.00000
 1987  129 PRO  N     15.61150  -0.87453  13.86478 4S   73     1.00000
 1988  129 PRO  CD    14.56554  -1.05325  12.85493 4S   73     1.00000
 1989  129 PRO  HD1   14.05976  -2.02640  13.03525 4S   73     0.00000
 1990  129 PRO  HD2   14.95970  -1.01277  11.81683 4S   73     0.00000
 1991  129 PRO  CA    15.17723   0.01488  14.92500 4S   73     1.00000
 1992  129 PRO  HA    15.82318   0.87769  14.94607 4S   73     0.00000
 1993  129 PRO  CB    13.72634   0.36875  14.58101 4S   73     1.00000
 1994  129 PRO  HB1   13.49813   1.42313  14.82537 4S   73     0.00000
 1995  129 PRO  HB2   13.00774  -0.29420  15.10727 4S   73     0.00000
 1996  129 PRO  CG    13.60217   0.10520  13.08488 4S   73     1.00000
 1997  129 PRO  HG1   12.56281  -0.14051  12.79448 4S   73     0.00000
 1998  129 PRO  HG2   13.94719   0.99663  12.52159 4S   73     0.00000
 1999  129 PRO  C     15.23465  -0.66090  16.26125 4S   73     1.00000
 2000  129 PRO  O     15.03393  -1.87228  16.34306 4S   73     1.00000
 2001  130 ILE  N     15.50649   0.12546  17.31988 4S   74     1.00000
 2002  130 ILE  HN    15.66017   1.10661  17.20193 4S   74     0.00000
 2003  130 ILE  CA    15.66211  -0.37329  18.65961 4S   74     1.00000
 2004  130 ILE  HA    16.36030  -1.19916  18.62501 4S   74     0.00000
 2005  130 ILE  CB    16.20872   0.69173  19.60196 4S   74     1.00000
 2006  130 ILE  HB    15.63693   1.63672  19.45114 4S   74     0.00000
 2007  130 ILE  CG2   16.03692   0.24772  21.07173 4S   74     1.00000
 2008  130 ILE  HG21  16.44658  -0.77540  21.20602 4S   74     0.00000
 2009  130 ILE  HG22  14.96460   0.25464  21.35738 4S   74     0.00000
 2010  130 ILE  HG23  16.55745   0.93615  21.76419 4S   74     0.00000
 2011  130 ILE  CG1   17.68887   0.98552  19.26684 4S   74     1.00000
 2012  130 ILE  HG11  17.76819   1.31800  18.20893 4S   74     0.00000
 2013  130 ILE  HG12  18.27950   0.04975  19.37804 4S   74     0.00000
 2014  130 ILE  CD    18.29209   2.06871  20.16416 4S   74     1.00000
 2015  130 ILE  HD1   18.41558   1.69101  21.20157 4S   74     0.00000
 2016  130 ILE  HD2   17.62788   2.95923  20.18911 4S   74     0.00000
 2017  130 ILE  HD3   19.28955   2.37162  19.78837 4S   74     0.00000
 2018  130 ILE  C     14.33491  -0.88869  19.15491 4S   74     1.00000
 2019  130 ILE  O     13.34534  -0.15951  19.20129 4S   74     1.00000
 2020  131 ASN  N     14.30987  -2.18580  19.52824 4S   75     1.00000
 2021  131 ASN  HN    15.11121  -2.77103  19.42608 4S   75     0.00000
 2022  131 ASN  CA    13.14609  -2.80427  20.09468 4S   75     1.00000
 2023  131 ASN  HA    12.51618  -2.04586  20.54146 4S   75     0.00000
 2024  131 ASN  CB    12.36238  -3.60162  19.03427 4S   75     1.00000
 2025  131 ASN  HB1   12.93863  -4.48250  18.68847 4S   75     0.00000
 2026  131 ASN  HB2   12.23763  -2.94075  18.15771 4S   75     0.00000
 2027  131 ASN  CG    10.98339  -4.02808  19.55751 4S   75     1.00000
 2028  131 ASN  OD1   10.66975  -3.91083  20.74622 4S   75     1.00000
 2029  131 ASN  ND2   10.13553  -4.54309  18.62555 4S   75     1.00000
 2030  131 ASN  HD21  10.44672  -4.62017  17.67465 4S   75     0.00000
 2031  131 ASN  HD22   9.22876  -4.86217  18.88998 4S   75     0.00000
 2032  131 ASN  C     13.65669  -3.71737  21.16677 4S   75     1.00000
 2033  131 ASN  O     14.06604  -4.84429  20.90764 4S   75     1.00000
 2034  132 THR  N     13.64735  -3.24541  22.42479 4S   76     1.00000
 2035  132 THR  HN    13.27846  -2.34439  22.64131 4S   76     0.00000
 2036  132 THR  CA    14.25908  -3.94347  23.53432 4S   76     1.00000
 2037  132 THR  HA    15.27761  -4.17279  23.24930 4S   76     0.00000
 2038  132 THR  CB    14.27825  -3.08035  24.78587 4S   76     1.00000
 2039  132 THR  HB    14.71954  -3.64279  25.63944 4S   76     0.00000
 2040  132 THR  OG1   12.97055  -2.64064  25.14073 4S   76     1.00000
 2041  132 THR  HG1   12.71789  -3.15938  25.90826 4S   76     0.00000
 2042  132 THR  CG2   15.14227  -1.83338  24.51644 4S   76     1.00000
 2043  132 THR  HG21  14.72800  -1.23071  23.68106 4S   76     0.00000
 2044  132 THR  HG22  16.18161  -2.12839  24.26238 4S   76     0.00000
 2045  132 THR  HG23  15.16747  -1.19244  25.42346 4S   76     0.00000
 2046  132 THR  C     13.57979  -5.26284  23.82826 4S   76     1.00000
 2047  132 THR  O     14.22944  -6.23323  24.20947 4S   76     1.00000
 2048  133 ASN  N     12.24688  -5.33080  23.62039 4S   77     1.00000
 2049  133 ASN  HN    11.74251  -4.54759  23.26442 4S   77     0.00000
 2050  133 ASN  CA    11.46458  -6.49494  23.95026 4S   77     1.00000
 2051  133 ASN  HA    12.00720  -7.08474  24.66786 4S   77     0.00000
 2052  133 ASN  CB    10.08717  -6.11017  24.53921 4S   77     1.00000
 2053  133 ASN  HB1    9.55202  -7.02410  24.87262 4S   77     0.00000
 2054  133 ASN  HB2    9.48125  -5.59344  23.76483 4S   77     0.00000
 2055  133 ASN  CG    10.26572  -5.18600  25.75304 4S   77     1.00000
 2056  133 ASN  OD1   10.69168  -5.60888  26.83108 4S   77     1.00000
 2057  133 ASN  ND2    9.92176  -3.87950  25.56198 4S   77     1.00000
 2058  133 ASN  HD21  10.00467  -3.23515  26.32087 4S   77     0.00000
 2059  133 ASN  HD22   9.58617  -3.58022  24.66987 4S   77     0.00000
 2060  133 ASN  C     11.27820  -7.35409  22.72613 4S   77     1.00000
 2061  133 ASN  O     10.15806  -7.60605  22.28125 4S   77     1.00000
 2062  134 SER  N     12.40309  -7.83741  22.15818 4S   78     1.00000
 2063  134 SER  HN    13.30516  -7.63552  22.53747 4S   78     0.00000
 2064  134 SER  CA    12.37357  -8.64926  20.97169 4S   78     1.00000
 2065  134 SER  HA    11.59111  -9.38744  21.07979 4S   78     0.00000
 2066  134 SER  CB    12.12553  -7.82307  19.68443 4S   78     1.00000
 2067  134 SER  HB1   11.18513  -7.24374  19.80311 4S   78     0.00000
 2068  134 SER  HB2   12.02599  -8.49231  18.80629 4S   78     0.00000
 2069  134 SER  OG    13.17200  -6.90246  19.42235 4S   78     1.00000
 2070  134 SER  HG1   13.23875  -6.32849  20.19686 4S   78     0.00000
 2071  134 SER  C     13.68560  -9.37376  20.90356 4S   78     1.00000
 2072  134 SER  O     14.72821  -8.82951  21.26671 4S   78     1.00000
 2073  135 SER  N     13.66245 -10.64084  20.43620 4S   79     1.00000
 2074  135 SER  HN    12.82629 -11.06021  20.09510 4S   79     0.00000
 2075  135 SER  CA    14.83037 -11.49054  20.44184 4S   79     1.00000
 2076  135 SER  HA    15.25353 -11.42463  21.43053 4S   79     0.00000
 2077  135 SER  CB    14.48305 -12.97132  20.14277 4S   79     1.00000
 2078  135 SER  HB1   13.85504 -13.35913  20.96429 4S   79     0.00000
 2079  135 SER  HB2   15.40022 -13.59329  20.07582 4S   79     0.00000
 2080  135 SER  OG    13.71273 -13.12996  18.96269 4S   79     1.00000
 2081  135 SER  HG1   14.32929 -13.06910  18.22668 4S   79     0.00000
 2082  135 SER  C     15.85122 -11.02274  19.43706 4S   79     1.00000
 2083  135 SER  O     15.46340 -10.37692  18.47005 4S   79     1.00000
 2084  136 PRO  N     17.14000 -11.33365  19.56645 4S   80     1.00000
 2085  136 PRO  CD    17.75465 -11.79185  20.81422 4S   80     1.00000
 2086  136 PRO  HD1   17.60421 -12.88910  20.89875 4S   80     0.00000
 2087  136 PRO  HD2   17.33341 -11.27418  21.70478 4S   80     0.00000
 2088  136 PRO  CA    18.14176 -10.98237  18.56908 4S   80     1.00000
 2089  136 PRO  HA    18.11909  -9.91411  18.42873 4S   80     0.00000
 2090  136 PRO  CB    19.46183 -11.48638  19.15538 4S   80     1.00000
 2091  136 PRO  HB1   20.31322 -10.84219  18.85710 4S   80     0.00000
 2092  136 PRO  HB2   19.66125 -12.53691  18.84525 4S   80     0.00000
 2093  136 PRO  CG    19.23801 -11.45907  20.66807 4S   80     1.00000
 2094  136 PRO  HG1   19.88606 -12.18728  21.19446 4S   80     0.00000
 2095  136 PRO  HG2   19.42893 -10.43276  21.05158 4S   80     0.00000
 2096  136 PRO  C     17.88298 -11.64148  17.24122 4S   80     1.00000
 2097  136 PRO  O     18.34661 -11.13805  16.22035 4S   80     1.00000
 2098  137 ASP  N     17.10497 -12.74315  17.22724 4S   81     1.00000
 2099  137 ASP  HN    16.79369 -13.17774  18.06972 4S   81     0.00000
 2100  137 ASP  CA    16.70660 -13.39173  16.00981 4S   81     1.00000
 2101  137 ASP  HA    17.58208 -13.50195  15.38886 4S   81     0.00000
 2102  137 ASP  CB    16.08865 -14.77885  16.27825 4S   81     1.00000
 2103  137 ASP  HB1   15.80531 -15.25731  15.31769 4S   81     0.00000
 2104  137 ASP  HB2   15.18326 -14.68182  16.91353 4S   81     0.00000
 2105  137 ASP  CG    17.10373 -15.67545  16.98997 4S   81     1.00000
 2106  137 ASP  OD1   18.30501 -15.64565  16.61241 4S   81     1.00000
 2107  137 ASP  OD2   16.67977 -16.40581  17.92335 4S   81     1.00000
 2108  137 ASP  C     15.72721 -12.55824  15.22730 4S   81     1.00000
 2109  137 ASP  O     15.56721 -12.77898  14.03489 4S   81     1.00000
 2110  138 ASP  N     15.08346 -11.55459  15.85880 4S   82     1.00000
 2111  138 ASP  HN    15.25231 -11.35135  16.82266 4S   82     0.00000
 2112  138 ASP  CA    14.08243 -10.73220  15.22930 4S   82     1.00000
 2113  138 ASP  HA    13.55568 -11.31389  14.49401 4S   82     0.00000
 2114  138 ASP  CB    13.05998 -10.18965  16.24441 4S   82     1.00000
 2115  138 ASP  HB1   12.32859  -9.51219  15.75194 4S   82     0.00000
 2116  138 ASP  HB2   13.58245  -9.61604  17.04047 4S   82     0.00000
 2117  138 ASP  CG    12.28723 -11.32508  16.89822 4S   82     1.00000
 2118  138 ASP  OD1   12.39195 -12.51271  16.49503 4S   82     1.00000
 2119  138 ASP  OD2   11.55909 -11.00045  17.86673 4S   82     1.00000
 2120  138 ASP  C     14.67109  -9.54986  14.52147 4S   82     1.00000
 2121  138 ASP  O     13.95406  -8.88489  13.78375 4S   82     1.00000
 2122  139 GLN  N     15.97319  -9.24378  14.71138 4S   83     1.00000
 2123  139 GLN  HN    16.57041  -9.81870  15.26628 4S   83     0.00000
 2124  139 GLN  CA    16.55732  -8.00649  14.24690 4S   83     1.00000
 2125  139 GLN  HA    15.83087  -7.21431  14.36650 4S   83     0.00000
 2126  139 GLN  CB    17.80265  -7.63857  15.07673 4S   83     1.00000
 2127  139 GLN  HB1   18.09828  -6.59214  14.85347 4S   83     0.00000
 2128  139 GLN  HB2   18.64261  -8.31519  14.80089 4S   83     0.00000
 2129  139 GLN  CG    17.61260  -7.77156  16.59454 4S   83     1.00000
 2130  139 GLN  HG1   18.51847  -7.41537  17.12722 4S   83     0.00000
 2131  139 GLN  HG2   17.46913  -8.84497  16.82802 4S   83     0.00000
 2132  139 GLN  CD    16.40060  -6.96969  17.07066 4S   83     1.00000
 2133  139 GLN  OE1   16.23785  -5.78680  16.75783 4S   83     1.00000
 2134  139 GLN  NE2   15.52337  -7.65571  17.85347 4S   83     1.00000
 2135  139 GLN  HE21  14.70565  -7.20403  18.21231 4S   83     0.00000
 2136  139 GLN  HE22  15.69464  -8.61965  18.07076 4S   83     0.00000
 2137  139 GLN  C     16.91937  -8.07621  12.78479 4S   83     1.00000
 2138  139 GLN  O     18.08665  -8.06872  12.40855 4S   83     1.00000
 2139  140 ILE  N     15.89093  -8.14789  11.92175 4S   84     1.00000
 2140  140 ILE  HN    14.95287  -8.17961  12.26556 4S   84     0.00000
 2141  140 ILE  CA    16.04969  -8.29255  10.50528 4S   84     1.00000
 2142  140 ILE  HA    16.80960  -7.59547  10.18965 4S   84     0.00000
 2143  140 ILE  CB    16.44346  -9.70766  10.09465 4S   84     1.00000
 2144  140 ILE  HB    17.42932  -9.93043  10.56473 4S   84     0.00000
 2145  140 ILE  CG2   15.42627 -10.73581  10.61827 4S   84     1.00000
 2146  140 ILE  HG21  14.47800 -10.65595  10.04838 4S   84     0.00000
 2147  140 ILE  HG22  15.22087 -10.60102  11.69780 4S   84     0.00000
 2148  140 ILE  HG23  15.82741 -11.75561  10.47633 4S   84     0.00000
 2149  140 ILE  CG1   16.63232  -9.84191   8.57560 4S   84     1.00000
 2150  140 ILE  HG11  17.31548  -9.03929   8.23456 4S   84     0.00000
 2151  140 ILE  HG12  15.65345  -9.68995   8.07244 4S   84     0.00000
 2152  140 ILE  CD    17.20026 -11.19958   8.16375 4S   84     1.00000
 2153  140 ILE  HD1   16.51451 -12.01767   8.46724 4S   84     0.00000
 2154  140 ILE  HD2   18.18862 -11.36852   8.64053 4S   84     0.00000
 2155  140 ILE  HD3   17.31729 -11.24256   7.06233 4S   84     0.00000
 2156  140 ILE  C     14.75057  -7.86073   9.88218 4S   84     1.00000
 2157  140 ILE  O     13.66603  -8.17409  10.37397 4S   84     1.00000
 2158  141 GLY  N     14.83572  -7.08858   8.77939 4S   85     1.00000
 2159  141 GLY  HN    15.71471  -6.85538   8.36158 4S   85     0.00000
 2160  141 GLY  CA    13.65513  -6.54620   8.16674 4S   85     1.00000
 2161  141 GLY  HA1   13.11964  -5.98105   8.91453 4S   85     0.00000
 2162  141 GLY  HA2   13.09198  -7.36221   7.73975 4S   85     0.00000
 2163  141 GLY  C     14.04262  -5.61415   7.07155 4S   85     1.00000
 2164  141 GLY  O     15.15237  -5.67083   6.55043 4S   85     1.00000
 2165  142 TYR  N     13.10760  -4.72559   6.68497 4S   86     1.00000
 2166  142 TYR  HN    12.21661  -4.67369   7.13781 4S   86     0.00000
 2167  142 TYR  CA    13.29538  -3.85338   5.55805 4S   86     1.00000
 2168  142 TYR  HA    14.35102  -3.65578   5.44683 4S   86     0.00000
 2169  142 TYR  CB    12.74807  -4.44690   4.23233 4S   86     1.00000
 2170  142 TYR  HB1   13.23655  -5.41543   4.04872 4S   86     0.00000
 2171  142 TYR  HB2   12.98294  -3.78278   3.37678 4S   86     0.00000
 2172  142 TYR  CG    11.27007  -4.70027   4.24836 4S   86     1.00000
 2173  142 TYR  CD1   10.74416  -5.86548   4.83018 4S   86     1.00000
 2174  142 TYR  HD1   11.40403  -6.59368   5.27619 4S   86     0.00000
 2175  142 TYR  CE1    9.36545  -6.08157   4.85251 4S   86     1.00000
 2176  142 TYR  HE1    8.96857  -6.97160   5.31844 4S   86     0.00000
 2177  142 TYR  CZ     8.51474  -5.12604   4.28829 4S   86     1.00000
 2178  142 TYR  OH     7.13358  -5.29819   4.34508 4S   86     1.00000
 2179  142 TYR  HH     6.97622  -6.14998   4.77276 4S   86     0.00000
 2180  142 TYR  CD2   10.39766  -3.75254   3.68952 4S   86     1.00000
 2181  142 TYR  HD2   10.79357  -2.84998   3.24889 4S   86     0.00000
 2182  142 TYR  CE2    9.01963  -3.96545   3.70622 4S   86     1.00000
 2183  142 TYR  HE2    8.34505  -3.24042   3.27711 4S   86     0.00000
 2184  142 TYR  C     12.63030  -2.53787   5.81127 4S   86     1.00000
 2185  142 TYR  O     11.72476  -2.43270   6.63005 4S   86     1.00000
 2186  143 TYR  N     13.06284  -1.50678   5.06269 4S   87     1.00000
 2187  143 TYR  HN    13.84265  -1.62033   4.44826 4S   87     0.00000
 2188  143 TYR  CA    12.44134  -0.21133   5.05445 4S   87     1.00000
 2189  143 TYR  HA    11.70619  -0.15299   5.83603 4S   87     0.00000
 2190  143 TYR  CB    13.45524   0.93492   5.20192 4S   87     1.00000
 2191  143 TYR  HB1   13.01980   1.90279   4.88516 4S   87     0.00000
 2192  143 TYR  HB2   14.34002   0.72333   4.58336 4S   87     0.00000
 2193  143 TYR  CG    13.92108   1.09072   6.61093 4S   87     1.00000
 2194  143 TYR  CD1   14.83554   0.19066   7.18064 4S   87     1.00000
 2195  143 TYR  HD1   15.20018  -0.65324   6.61282 4S   87     0.00000
 2196  143 TYR  CE1   15.28120   0.38095   8.49085 4S   87     1.00000
 2197  143 TYR  HE1   15.96730  -0.33039   8.91483 4S   87     0.00000
 2198  143 TYR  CZ    14.82228   1.47620   9.23429 4S   87     1.00000
 2199  143 TYR  OH    15.26578   1.70688  10.54311 4S   87     1.00000
 2200  143 TYR  HH    15.95303   1.05299  10.72366 4S   87     0.00000
 2201  143 TYR  CD2   13.47258   2.18418   7.36857 4S   87     1.00000
 2202  143 TYR  HD2   12.78788   2.89635   6.93982 4S   87     0.00000
 2203  143 TYR  CE2   13.91861   2.37557   8.67500 4S   87     1.00000
 2204  143 TYR  HE2   13.57191   3.22317   9.24668 4S   87     0.00000
 2205  143 TYR  C     11.75387  -0.03038   3.73186 4S   87     1.00000
 2206  143 TYR  O     12.34518  -0.26809   2.68400 4S   87     1.00000
 2207  144 ARG  N     10.47934   0.41143   3.76679 4S   88     1.00000
 2208  144 ARG  HN    10.02130   0.57753   4.63958 4S   88     0.00000
 2209  144 ARG  CA     9.67907   0.67098   2.60546 4S   88     1.00000
 2210  144 ARG  HA    10.21344   0.37320   1.72547 4S   88     0.00000
 2211  144 ARG  CB     8.34726  -0.09176   2.65797 4S   88     1.00000
 2212  144 ARG  HB1    7.76716   0.22567   3.55105 4S   88     0.00000
 2213  144 ARG  HB2    8.57651  -1.17416   2.77554 4S   88     0.00000
 2214  144 ARG  CG     7.47783   0.06785   1.40741 4S   88     1.00000
 2215  144 ARG  HG1    8.04321  -0.26124   0.50889 4S   88     0.00000
 2216  144 ARG  HG2    7.21562   1.13956   1.26922 4S   88     0.00000
 2217  144 ARG  CD     6.20758  -0.76164   1.54266 4S   88     1.00000
 2218  144 ARG  HD1    5.62427  -0.41893   2.42510 4S   88     0.00000
 2219  144 ARG  HD2    6.44574  -1.83905   1.66639 4S   88     0.00000
 2220  144 ARG  NE     5.39637  -0.61421   0.29807 4S   88     1.00000
 2221  144 ARG  HE     5.51181  -1.28323  -0.43474 4S   88     0.00000
 2222  144 ARG  CZ     4.46491   0.36605   0.14668 4S   88     1.00000
 2223  144 ARG  NH1    4.26684   1.29351   1.11321 4S   88     1.00000
 2224  144 ARG  HH11   4.86357   1.29622   1.91258 4S   88     0.00000
 2225  144 ARG  HH12   3.49048   1.92175   1.05417 4S   88     0.00000
 2226  144 ARG  NH2    3.72510   0.41655  -0.98803 4S   88     1.00000
 2227  144 ARG  HH21   3.89550  -0.25077  -1.70954 4S   88     0.00000
 2228  144 ARG  HH22   3.05847   1.14912  -1.10938 4S   88     0.00000
 2229  144 ARG  C      9.41026   2.14130   2.51836 4S   88     1.00000
 2230  144 ARG  O      8.83154   2.73649   3.42483 4S   88     1.00000
 2231  145 ARG  N      9.82208   2.76549   1.39622 4S   89     1.00000
 2232  145 ARG  HN    10.31207   2.26898   0.67741 4S   89     0.00000
 2233  145 ARG  CA     9.61453   4.16836   1.15588 4S   89     1.00000
 2234  145 ARG  HA     9.81766   4.71172   2.06733 4S   89     0.00000
 2235  145 ARG  CB    10.55759   4.66644   0.05154 4S   89     1.00000
 2236  145 ARG  HB1   10.47322   3.97842  -0.81652 4S   89     0.00000
 2237  145 ARG  HB2   11.59267   4.58482   0.42990 4S   89     0.00000
 2238  145 ARG  CG    10.36149   6.11876  -0.40552 4S   89     1.00000
 2239  145 ARG  HG1   10.59286   6.80029   0.44386 4S   89     0.00000
 2240  145 ARG  HG2    9.30462   6.28557  -0.70504 4S   89     0.00000
 2241  145 ARG  CD    11.26165   6.47350  -1.58853 4S   89     1.00000
 2242  145 ARG  HD1   12.32569   6.34448  -1.29908 4S   89     0.00000
 2243  145 ARG  HD2   11.07645   7.51216  -1.93139 4S   89     0.00000
 2244  145 ARG  NE    10.93947   5.54336  -2.71680 4S   89     1.00000
 2245  145 ARG  HE    10.06498   5.05953  -2.70775 4S   89     0.00000
 2246  145 ARG  CZ    11.81139   5.29942  -3.73284 4S   89     1.00000
 2247  145 ARG  NH1   13.02758   5.90215  -3.77192 4S   89     1.00000
 2248  145 ARG  HH11  13.29223   6.52778  -3.04006 4S   89     0.00000
 2249  145 ARG  HH12  13.65578   5.72105  -4.52591 4S   89     0.00000
 2250  145 ARG  NH2   11.45396   4.43799  -4.71958 4S   89     1.00000
 2251  145 ARG  HH21  10.56205   3.99069  -4.68396 4S   89     0.00000
 2252  145 ARG  HH22  12.08232   4.26614  -5.47497 4S   89     0.00000
 2253  145 ARG  C      8.19430   4.41993   0.72518 4S   89     1.00000
 2254  145 ARG  O      7.64326   3.69784  -0.10450 4S   89     1.00000
 2255  146 ALA  N      7.57930   5.47578   1.29976 4S   90     1.00000
 2256  146 ALA  HN     8.04221   6.00991   2.00887 4S   90     0.00000
 2257  146 ALA  CA     6.24756   5.90627   0.96579 4S   90     1.00000
 2258  146 ALA  HA     5.87062   5.31516   0.14448 4S   90     0.00000
 2259  146 ALA  CB     5.30268   5.76079   2.17344 4S   90     1.00000
 2260  146 ALA  HB1    5.66980   6.35547   3.03736 4S   90     0.00000
 2261  146 ALA  HB2    5.26339   4.69352   2.48398 4S   90     0.00000
 2262  146 ALA  HB3    4.27536   6.08900   1.91271 4S   90     0.00000
 2263  146 ALA  C      6.30440   7.34761   0.50939 4S   90     1.00000
 2264  146 ALA  O      6.86935   8.19576   1.20278 4S   90     1.00000
 2265  147 THR  N      5.71829   7.62773  -0.69567 4S   91     1.00000
 2266  147 THR  HN     5.24765   6.90645  -1.19421 4S   91     0.00000
 2267  147 THR  CA     5.70122   8.92948  -1.36695 4S   91     1.00000
 2268  147 THR  HA     6.03926   9.66904  -0.64478 4S   91     0.00000
 2269  147 THR  CB     6.51044   9.06922  -2.63736 4S   91     1.00000
 2270  147 THR  HB     6.04872   8.42934  -3.42555 4S   91     0.00000
 2271  147 THR  OG1    7.82004   8.60943  -2.40487 4S   91     1.00000
 2272  147 THR  HG1    8.31760   9.07606  -3.07776 4S   91     0.00000
 2273  147 THR  CG2    6.65662  10.53516  -3.16090 4S   91     1.00000
 2274  147 THR  HG21   7.03985  11.20462  -2.35960 4S   91     0.00000
 2275  147 THR  HG22   5.72790  10.99722  -3.53415 4S   91     0.00000
 2276  147 THR  HG23   7.26097  10.57637  -4.08225 4S   91     0.00000
 2277  147 THR  C      4.30502   9.21628  -1.91824 4S   91     1.00000
 2278  147 THR  O      3.45620   8.34644  -2.06084 4S   91     1.00000
 2279  148 ARG  N      4.01877  10.53512  -2.11835 4S   92     1.00000
 2280  148 ARG  HN     4.64151  11.14671  -1.63049 4S   92     0.00000
 2281  148 ARG  CA     2.65363  11.20823  -1.88446 4S   92     1.00000
 2282  148 ARG  HA     2.01483  10.57522  -2.63815 4S   92     0.00000
 2283  148 ARG  CB     1.57845  11.10896   1.99600 4S   92     1.00000
 2284  148 ARG  HB1    0.90367  10.36215   1.60866 4S   92     0.00000
 2285  148 ARG  HB2    1.48374  12.15556   1.90867 4S   92     0.00000
 2286  148 ARG  CG     3.04752  10.62744   2.56776 4S   92     0.00000
 2287  148 ARG  HG1    2.46587   9.70073   2.75138 4S   92     0.00000
 2288  148 ARG  HG2    3.16637  11.70669   2.85060 4S   92     0.00000
 2289  148 ARG  CD     4.25113  10.24438   1.72861 4S   92     0.00000
 2290  148 ARG  HD1    4.45802   9.17060   1.59069 4S   92     0.00000
 2291  148 ARG  HD2    5.19281  10.82966   1.87839 4S   92     0.00000
 2292  148 ARG  NE     3.78153  10.58007   0.50090 4S   92     0.00000
 2293  148 ARG  HE     4.52465  10.48152  -0.16762 4S   92     0.00000
 2294  148 ARG  CZ     2.48797  10.36442   0.05386 4S   92     0.00000
 2295  148 ARG  NH1    2.65447  11.90015   0.20010 4S   92     0.00000
 2296  148 ARG  HH11   2.65107  12.86665  -0.04004 4S   92     0.00000
 2297  148 ARG  HH12   2.09744  11.16094   0.65014 4S   92     0.00000
 2298  148 ARG  NH2    1.10456  11.19665  -0.28770 4S   92     0.00000
 2299  148 ARG  HH21   1.01665  12.18091   0.22488 4S   92     0.00000
 2300  148 ARG  HH22   0.23162  10.91476  -0.57680 4S   92     0.00000
 2301  148 ARG  C      3.24406  12.63204  -2.33396 4S   92     1.00000
 2302  148 ARG  OT1    2.86838  13.31967  -3.28256 4S   92     1.00000
 2303  148 ARG  OT2    4.07060  13.07746  -1.47543 4S   92     0.00000
 2304  149 LYS  N      2.75850  17.85538  -4.72050 5S   102    1.00000
 2305  149 LYS  HT1    2.77476  17.17803  -5.53429 5S   102    0.00000
 2306  149 LYS  HT2    2.33835  18.28378  -5.57957 5S   102    0.00000
 2307  149 LYS  HT3    1.94416  18.41310  -4.40909 5S   102    0.00000
 2308  149 LYS  CA     4.17412  18.76691  -4.34194 5S   102    1.00000
 2309  149 LYS  HA     4.89076  18.88428  -5.15236 5S   102    0.00000
 2310  149 LYS  CB     4.61833  20.33142  -4.17203 5S   102    1.00000
 2311  149 LYS  HB1    5.40613  20.72945  -4.89036 5S   102    0.00000
 2312  149 LYS  HB2    5.17448  20.38765  -3.21650 5S   102    0.00000
 2313  149 LYS  CG     3.59661  21.45248  -4.22834 5S   102    0.00000
 2314  149 LYS  HG1    3.95912  22.36073  -4.77674 5S   102    0.00000
 2315  149 LYS  HG2    3.40206  21.72070  -3.15720 5S   102    0.00000
 2316  149 LYS  CD     2.33157  21.10030  -4.95772 5S   102    0.00000
 2317  149 LYS  HD1    1.90077  21.95380  -5.50661 5S   102    0.00000
 2318  149 LYS  HD2    1.57471  20.97147  -4.12133 5S   102    0.00000
 2319  149 LYS  CE     2.33718  20.07677  -6.19562 5S   102    0.00000
 2320  149 LYS  HE1    1.55542  20.15736  -6.90318 5S   102    0.00000
 2321  149 LYS  HE2    1.75072  19.56238  -5.41490 5S   102    0.00000
 2322  149 LYS  NZ     3.45397  19.04803  -6.83063 5S   102    0.00000
 2323  149 LYS  HZ1    3.71917  18.53593  -5.96152 5S   102    0.00000
 2324  149 LYS  HZ2    4.41940  19.38735  -6.65853 5S   102    0.00000
 2325  149 LYS  HZ3    3.29599  17.99642  -6.82162 5S   102    0.00000
 2326  149 LYS  C      4.72042  17.72566  -3.70946 5S   102    1.00000
 2327  149 LYS  O      4.08168  17.30322  -2.75666 5S   102    1.00000
 2328  150 ASP  N      5.80622  17.13511  -4.25984 5S   103    1.00000
 2329  150 ASP  HN     6.32020  17.39991  -5.08236 5S   103    0.00000
 2330  150 ASP  CA     6.19267  15.93413  -3.61644 5S   103    1.00000
 2331  150 ASP  HA     5.29828  15.33587  -3.46393 5S   103    0.00000
 2332  150 ASP  CB     7.27105  15.14225  -4.36891 5S   103    1.00000
 2333  150 ASP  HB1    7.84789  14.52658  -3.64679 5S   103    0.00000
 2334  150 ASP  HB2    7.95751  15.85813  -4.86814 5S   103    0.00000
 2335  150 ASP  CG     6.67740  14.19900  -5.41552 5S   103    1.00000
 2336  150 ASP  OD1    5.55008  13.68058  -5.20607 5S   103    1.00000
 2337  150 ASP  OD2    7.37376  13.96697  -6.43873 5S   103    1.00000
 2338  150 ASP  C      6.73573  16.36279  -2.28606 5S   103    1.00000
 2339  150 ASP  O      7.39048  17.39879  -2.16559 5S   103    1.00000
 2340  151 LEU  N      6.35270  15.60981  -1.25296 5S   104    1.00000
 2341  151 LEU  HN     5.73407  14.83287  -1.36611 5S   104    0.00000
 2342  151 LEU  CA     6.79836  15.89011   0.07118 5S   104    1.00000
 2343  151 LEU  HA     7.07332  16.93127   0.17036 5S   104    0.00000
 2344  151 LEU  CB     5.71812  15.52178   1.09745 5S   104    1.00000
 2345  151 LEU  HB1    6.13296  15.58970   2.11868 5S   104    0.00000
 2346  151 LEU  HB2    5.40652  14.46695   0.94116 5S   104    0.00000
 2347  151 LEU  CG     4.47041  16.42593   1.04577 5S   104    1.00000
 2348  151 LEU  HG     4.07160  16.43976   0.00548 5S   104    0.00000
 2349  151 LEU  CD1    3.38625  15.83487   1.95753 5S   104    1.00000
 2350  151 LEU  HD11   3.81729  15.63425   2.96062 5S   104    0.00000
 2351  151 LEU  HD12   3.00805  14.87859   1.54200 5S   104    0.00000
 2352  151 LEU  HD13   2.53963  16.54426   2.06351 5S   104    0.00000
 2353  151 LEU  CD2    4.79613  17.87923   1.43735 5S   104    1.00000
 2354  151 LEU  HD21   5.54653  18.31629   0.74734 5S   104    0.00000
 2355  151 LEU  HD22   5.19424  17.91609   2.47117 5S   104    0.00000
 2356  151 LEU  HD23   3.87890  18.50262   1.39919 5S   104    0.00000
 2357  151 LEU  C      8.02361  15.07004   0.30593 5S   104    1.00000
 2358  151 LEU  O      8.43330  14.26776  -0.53380 5S   104    1.00000
 2359  152 SER  N      8.65072  15.26490   1.48296 5S   105    1.00000
 2360  152 SER  HN     8.33495  15.94695   2.14035 5S   105    0.00000
 2361  152 SER  CA     9.82427  14.52999   1.86937 5S   105    1.00000
 2362  152 SER  HA    10.55741  14.69437   1.09960 5S   105    0.00000
 2363  152 SER  CB    10.40029  15.03549   3.20299 5S   105    1.00000
 2364  152 SER  HB1   11.31264  14.46841   3.47480 5S   105    0.00000
 2365  152 SER  HB2    9.65012  14.91334   4.01384 5S   105    0.00000
 2366  152 SER  OG    10.72382  16.41634   3.09429 5S   105    1.00000
 2367  152 SER  HG1   11.28897  16.49700   2.32084 5S   105    0.00000
 2368  152 SER  C      9.48251  13.06033   2.00474 5S   105    1.00000
 2369  152 SER  O      8.48770  12.75217   2.66427 5S   105    1.00000
 2370  153 PRO  N     10.21180  12.11960   1.39624 5S   106    1.00000
 2371  153 PRO  CD    11.34752  12.36171   0.50284 5S   106    1.00000
 2372  153 PRO  HD1   12.26457  12.41076   1.11752 5S   106    0.00000
 2373  153 PRO  HD2   11.25288  13.28996  -0.09878 5S   106    0.00000
 2374  153 PRO  CA     9.84347  10.71463   1.42959 5S   106    1.00000
 2375  153 PRO  HA     8.80580  10.61105   1.14390 5S   106    0.00000
 2376  153 PRO  CB    10.81166  10.02121   0.45553 5S   106    1.00000
 2377  153 PRO  HB1   10.28037   9.27884  -0.17387 5S   106    0.00000
 2378  153 PRO  HB2   11.64571   9.52031   0.99481 5S   106    0.00000
 2379  153 PRO  CG    11.39146  11.14423  -0.41099 5S   106    1.00000
 2380  153 PRO  HG1   12.42113  10.91724  -0.75377 5S   106    0.00000
 2381  153 PRO  HG2   10.73144  11.32934  -1.28591 5S   106    0.00000
 2382  153 PRO  C     10.01248  10.17822   2.82112 5S   106    1.00000
 2383  153 PRO  O     10.87440  10.65902   3.54816 5S   106    1.00000
 2384  154 ARG  N      9.16736   9.21360   3.21306 5S   107    1.00000
 2385  154 ARG  HN     8.47156   8.85983   2.59287 5S   107    0.00000
 2386  154 ARG  CA     9.15251   8.69472   4.55199 5S   107    1.00000
 2387  154 ARG  HA     9.96610   9.11094   5.13211 5S   107    0.00000
 2388  154 ARG  CB     7.81671   8.99040   5.25946 5S   107    1.00000
 2389  154 ARG  HB1    7.80774   8.45920   6.23154 5S   107    0.00000
 2390  154 ARG  HB2    6.96908   8.60516   4.65409 5S   107    0.00000
 2391  154 ARG  CG     7.59548  10.48666   5.53028 5S   107    1.00000
 2392  154 ARG  HG1    6.95337  10.92771   4.73752 5S   107    0.00000
 2393  154 ARG  HG2    8.58060  11.00620   5.48336 5S   107    0.00000
 2394  154 ARG  CD     7.01606  10.74803   6.92250 5S   107    1.00000
 2395  154 ARG  HD1    7.33659  11.74194   7.28593 5S   107    0.00000
 2396  154 ARG  HD2    7.35633   9.97738   7.63849 5S   107    0.00000
 2397  154 ARG  NE     5.52543  10.70989   6.87824 5S   107    1.00000
 2398  154 ARG  HE     5.06613  10.47864   6.02219 5S   107    0.00000
 2399  154 ARG  CZ     4.77056  10.99923   7.97513 5S   107    1.00000
 2400  154 ARG  NH1    5.34871  11.32832   9.15870 5S   107    1.00000
 2401  154 ARG  HH11   4.78827  11.69916   9.89767 5S   107    0.00000
 2402  154 ARG  HH12   6.34064  11.28248   9.25232 5S   107    0.00000
 2403  154 ARG  NH2    3.41744  10.96057   7.88343 5S   107    1.00000
 2404  154 ARG  HH21   2.85635  11.10944   8.69398 5S   107    0.00000
 2405  154 ARG  HH22   2.99860  10.87993   6.97943 5S   107    0.00000
 2406  154 ARG  C      9.35072   7.21195   4.46531 5S   107    1.00000
 2407  154 ARG  O      8.67163   6.52851   3.70711 5S   107    1.00000
 2408  155 TRP  N     10.31418   6.68246   5.24177 5S   108    1.00000
 2409  155 TRP  HN    10.84665   7.26079   5.86221 5S   108    0.00000
 2410  155 TRP  CA    10.73570   5.30697   5.17758 5S   108    1.00000
 2411  155 TRP  HA    10.29567   4.82348   4.31859 5S   108    0.00000
 2412  155 TRP  CB    12.27148   5.18444   5.08738 5S   108    1.00000
 2413  155 TRP  HB1   12.57508   4.12201   5.17795 5S   108    0.00000
 2414  155 TRP  HB2   12.73033   5.75333   5.92644 5S   108    0.00000
 2415  155 TRP  CG    12.83909   5.73682   3.79529 5S   108    1.00000
 2416  155 TRP  CD1   13.08897   7.04301   3.48152 5S   108    1.00000
 2417  155 TRP  HD1   12.91394   7.87910   4.14190 5S   108    0.00000
 2418  155 TRP  NE1   13.59841   7.14138   2.21062 5S   108    1.00000
 2419  155 TRP  HE1   13.85999   7.96641   1.75367 5S   108    0.00000
 2420  155 TRP  CE2   13.69166   5.88022   1.67428 5S   108    1.00000
 2421  155 TRP  CD2   13.21614   4.96416   2.63779 5S   108    1.00000
 2422  155 TRP  CE3   13.18102   3.59616   2.36857 5S   108    1.00000
 2423  155 TRP  HE3   12.79608   2.87780   3.07017 5S   108    0.00000
 2424  155 TRP  CZ3   13.63875   3.15908   1.11529 5S   108    1.00000
 2425  155 TRP  HZ3   13.60227   2.10714   0.87304 5S   108    0.00000
 2426  155 TRP  CZ2   14.14441   5.44753   0.43472 5S   108    1.00000
 2427  155 TRP  HZ2   14.48933   6.14343  -0.31457 5S   108    0.00000
 2428  155 TRP  CH2   14.11138   4.07331   0.16039 5S   108    1.00000
 2429  155 TRP  HH2   14.42821   3.72087  -0.80988 5S   108    0.00000
 2430  155 TRP  C     10.25613   4.61285   6.41680 5S   108    1.00000
 2431  155 TRP  O     10.56285   5.02268   7.53007 5S   108    1.00000
 2432  156 TYR  N      9.46990   3.53352   6.24943 5S   109    1.00000
 2433  156 TYR  HN     9.24463   3.19803   5.33512 5S   109    0.00000
 2434  156 TYR  CA     8.86006   2.83290   7.35668 5S   109    1.00000
 2435  156 TYR  HA     9.06535   3.33770   8.29050 5S   109    0.00000
 2436  156 TYR  CB     7.33362   2.66518   7.16383 5S   109    1.00000
 2437  156 TYR  HB1    6.92845   1.94065   7.90144 5S   109    0.00000
 2438  156 TYR  HB2    7.12144   2.29366   6.13803 5S   109    0.00000
 2439  156 TYR  CG     6.59922   3.96930   7.35255 5S   109    1.00000
 2440  156 TYR  CD1    6.38572   4.84746   6.27286 5S   109    1.00000
 2441  156 TYR  HD1    6.77850   4.60545   5.29611 5S   109    0.00000
 2442  156 TYR  CE1    5.66094   6.03365   6.44861 5S   109    1.00000
 2443  156 TYR  HE1    5.51768   6.70793   5.61656 5S   109    0.00000
 2444  156 TYR  CZ     5.12702   6.34525   7.70478 5S   109    1.00000
 2445  156 TYR  OH     4.42759   7.55308   7.90033 5S   109    1.00000
 2446  156 TYR  HH     4.17473   7.59611   8.82544 5S   109    0.00000
 2447  156 TYR  CD2    6.07229   4.30585   8.61252 5S   109    1.00000
 2448  156 TYR  HD2    6.22746   3.64774   9.45481 5S   109    0.00000
 2449  156 TYR  CE2    5.33387   5.48179   8.78842 5S   109    1.00000
 2450  156 TYR  HE2    4.95287   5.73489   9.76758 5S   109    0.00000
 2451  156 TYR  C      9.47248   1.46440   7.44041 5S   109    1.00000
 2452  156 TYR  O      9.69695   0.82167   6.42345 5S   109    1.00000
 2453  157 PHE  N      9.75369   0.97890   8.66950 5S   110    1.00000
 2454  157 PHE  HN     9.53888   1.49686   9.49333 5S   110    0.00000
 2455  157 PHE  CA    10.40696  -0.29225   8.88104 5S   110    1.00000
 2456  157 PHE  HA    10.98027  -0.54811   8.00251 5S   110    0.00000
 2457  157 PHE  CB    11.37620  -0.22805  10.09051 5S   110    1.00000
 2458  157 PHE  HB1   10.84919   0.18415  10.97728 5S   110    0.00000
 2459  157 PHE  HB2   12.22386   0.44434   9.84248 5S   110    0.00000
 2460  157 PHE  CG    11.95137  -1.57023  10.46129 5S   110    1.00000
 2461  157 PHE  CD1   13.04150  -2.10676   9.76451 5S   110    1.00000
 2462  157 PHE  HD1   13.48743  -1.54740   8.95924 5S   110    0.00000
 2463  157 PHE  CE1   13.54343  -3.36736  10.10344 5S   110    1.00000
 2464  157 PHE  HE1   14.37945  -3.77688   9.56630 5S   110    0.00000
 2465  157 PHE  CZ    12.95521  -4.10729  11.13425 5S   110    1.00000
 2466  157 PHE  HZ    13.34418  -5.08030  11.39357 5S   110    0.00000
 2467  157 PHE  CD2   11.35463  -2.32751  11.48312 5S   110    1.00000
 2468  157 PHE  HD2   10.49157  -1.94081  11.99914 5S   110    0.00000
 2469  157 PHE  CE2   11.85605  -3.58546  11.82156 5S   110    1.00000
 2470  157 PHE  HE2   11.39567  -4.14897  12.61385 5S   110    0.00000
 2471  157 PHE  C      9.37477  -1.36860   9.09960 5S   110    1.00000
 2472  157 PHE  O      8.42730  -1.20456   9.85851 5S   110    1.00000
 2473  158 TYR  N      9.58035  -2.53278   8.45938 5S   111    1.00000
 2474  158 TYR  HN    10.34391  -2.64259   7.82077 5S   111    0.00000
 2475  158 TYR  CA     8.76258  -3.69416   8.66918 5S   111    1.00000
 2476  158 TYR  HA     8.17978  -3.59223   9.57033 5S   111    0.00000
 2477  158 TYR  CB     7.85028  -3.99322   7.46467 5S   111    1.00000
 2478  158 TYR  HB1    7.29398  -4.94333   7.60791 5S   111    0.00000
 2479  158 TYR  HB2    8.46844  -4.06051   6.54969 5S   111    0.00000
 2480  158 TYR  CG     6.85110  -2.89839   7.24842 5S   111    1.00000
 2481  158 TYR  CD1    5.61117  -2.94110   7.90848 5S   111    1.00000
 2482  158 TYR  HD1    5.37492  -3.75299   8.57835 5S   111    0.00000
 2483  158 TYR  CE1    4.65651  -1.95283   7.68077 5S   111    1.00000
 2484  158 TYR  HE1    3.69808  -1.99010   8.17751 5S   111    0.00000
 2485  158 TYR  CZ     4.95361  -0.91072   6.81242 5S   111    1.00000
 2486  158 TYR  OH     3.98794   0.05786   6.62763 5S   111    1.00000
 2487  158 TYR  HH     3.22472  -0.15861   7.16488 5S   111    0.00000
 2488  158 TYR  CD2    7.12486  -1.83668   6.36230 5S   111    1.00000
 2489  158 TYR  HD2    8.07048  -1.79263   5.84311 5S   111    0.00000
 2490  158 TYR  CE2    6.17850  -0.83146   6.14885 5S   111    1.00000
 2491  158 TYR  HE2    6.39108  -0.01158   5.47666 5S   111    0.00000
 2492  158 TYR  C      9.69622  -4.85106   8.85807 5S   111    1.00000
 2493  158 TYR  O     10.65844  -5.01570   8.11424 5S   111    1.00000
 2494  159 TYR  N      9.42277  -5.70706   9.86785 5S   112    1.00000
 2495  159 TYR  HN     8.64635  -5.56310  10.47574 5S   112    0.00000
 2496  159 TYR  CA    10.20013  -6.89616  10.13586 5S   112    1.00000
 2497  159 TYR  HA    11.23766  -6.60704  10.22871 5S   112    0.00000
 2498  159 TYR  CB     9.73108  -7.62253  11.42176 5S   112    1.00000
 2499  159 TYR  HB1   10.17512  -8.63700  11.48844 5S   112    0.00000
 2500  159 TYR  HB2    8.62428  -7.71293  11.42929 5S   112    0.00000
 2501  159 TYR  CG    10.14343  -6.88478  12.66047 5S   112    1.00000
 2502  159 TYR  CD1   11.36983  -7.18581  13.27238 5S   112    1.00000
 2503  159 TYR  HD1   12.01303  -7.92305  12.82254 5S   112    0.00000
 2504  159 TYR  CE1   11.75777  -6.54719  14.45360 5S   112    1.00000
 2505  159 TYR  HE1   12.70651  -6.78079  14.91722 5S   112    0.00000
 2506  159 TYR  CZ    10.91577  -5.59247  15.02243 5S   112    1.00000
 2507  159 TYR  OH    11.36263  -4.89079  16.14545 5S   112    1.00000
 2508  159 TYR  HH    12.29276  -5.09045  16.26955 5S   112    0.00000
 2509  159 TYR  CD2    9.29864  -5.93377  13.25691 5S   112    1.00000
 2510  159 TYR  HD2    8.34659  -5.70221  12.80478 5S   112    0.00000
 2511  159 TYR  CE2    9.67618  -5.29543  14.44445 5S   112    1.00000
 2512  159 TYR  HE2    9.02534  -4.55872  14.89286 5S   112    0.00000
 2513  159 TYR  C     10.10943  -7.87001   8.98191 5S   112    1.00000
 2514  159 TYR  O      9.23745  -7.79750   8.12085 5S   112    1.00000
 2515  160 LEU  N     11.05718  -8.81423   8.90411 5S   113    1.00000
 2516  160 LEU  HN    11.80895  -8.85096   9.55971 5S   113    0.00000
 2517  160 LEU  CA    11.11816  -9.74987   7.81165 5S   113    1.00000
 2518  160 LEU  HA    11.17144  -9.18716   6.88925 5S   113    0.00000
 2519  160 LEU  CB    12.36256 -10.63229   7.97210 5S   113    1.00000
 2520  160 LEU  HB1   12.32956 -11.11205   8.97601 5S   113    0.00000
 2521  160 LEU  HB2   13.25801  -9.97131   7.94496 5S   113    0.00000
 2522  160 LEU  CG    12.53681 -11.72456   6.90686 5S   113    1.00000
 2523  160 LEU  HG    11.63321 -12.37787   6.90811 5S   113    0.00000
 2524  160 LEU  CD1   12.70722 -11.11849   5.50723 5S   113    1.00000
 2525  160 LEU  HD11  13.60394 -10.46234   5.49581 5S   113    0.00000
 2526  160 LEU  HD12  11.82134 -10.51094   5.22890 5S   113    0.00000
 2527  160 LEU  HD13  12.83844 -11.92040   4.75248 5S   113    0.00000
 2528  160 LEU  CD2   13.73014 -12.60919   7.27238 5S   113    1.00000
 2529  160 LEU  HD21  13.65448 -12.93527   8.33054 5S   113    0.00000
 2530  160 LEU  HD22  14.67484 -12.04319   7.14483 5S   113    0.00000
 2531  160 LEU  HD23  13.74732 -13.50642   6.62058 5S   113    0.00000
 2532  160 LEU  C      9.88777 -10.61680   7.77522 5S   113    1.00000
 2533  160 LEU  O      9.43923 -11.10619   8.80359 5S   113    1.00000
 2534  161 GLY  N      9.27568 -10.77194   6.58220 5S   114    1.00000
 2535  161 GLY  HN     9.65185 -10.37665   5.74706 5S   114    0.00000
 2536  161 GLY  CA     8.07707 -11.55981   6.43248 5S   114    1.00000
 2537  161 GLY  HA1    8.19958 -12.47811   6.98505 5S   114    0.00000
 2538  161 GLY  HA2    7.95656 -11.72911   5.37822 5S   114    0.00000
 2539  161 GLY  C      6.83935 -10.87315   6.94267 5S   114    1.00000
 2540  161 GLY  O      5.83338 -11.53466   7.18674 5S   114    1.00000
 2541  162 THR  N      6.87798  -9.53097   7.12354 5S   115    1.00000
 2542  162 THR  HN     7.71279  -9.01141   6.95203 5S   115    0.00000
 2543  162 THR  CA     5.73992  -8.76613   7.59522 5S   115    1.00000
 2544  162 THR  HA     4.84831  -9.37374   7.53954 5S   115    0.00000
 2545  162 THR  CB     5.89361  -8.23899   9.01991 5S   115    1.00000
 2546  162 THR  HB     4.94874  -7.76528   9.35979 5S   115    0.00000
 2547  162 THR  OG1    6.89993  -7.25194   9.14327 5S   115    1.00000
 2548  162 THR  HG1    7.69832  -7.66729   8.78676 5S   115    0.00000
 2549  162 THR  CG2    6.24909  -9.39550   9.96172 5S   115    1.00000
 2550  162 THR  HG21   7.26935  -9.78484   9.75203 5S   115    0.00000
 2551  162 THR  HG22   5.52290 -10.22542   9.83575 5S   115    0.00000
 2552  162 THR  HG23   6.22300  -9.04669  11.01517 5S   115    0.00000
 2553  162 THR  C      5.54600  -7.61382   6.65839 5S   115    1.00000
 2554  162 THR  O      6.40934  -7.34653   5.83129 5S   115    1.00000
 2555  163 GLY  N      4.40697  -6.89567   6.79079 5S   116    1.00000
 2556  163 GLY  HN     3.69313  -7.18285   7.42398 5S   116    0.00000
 2557  163 GLY  CA     4.18636  -5.63133   6.12736 5S   116    1.00000
 2558  163 GLY  HA1    5.10107  -5.06169   6.19583 5S   116    0.00000
 2559  163 GLY  HA2    3.35208  -5.15716   6.62140 5S   116    0.00000
 2560  163 GLY  C      3.82440  -5.80648   4.68245 5S   116    1.00000
 2561  163 GLY  O      3.48725  -6.91229   4.26002 5S   116    1.00000
 2562  164 PRO  N      3.90083  -4.74465   3.88098 5S   117    1.00000
 2563  164 PRO  CD     4.11928  -3.37443   4.35803 5S   117    1.00000
 2564  164 PRO  HD1    5.21428  -3.19651   4.43815 5S   117    0.00000
 2565  164 PRO  HD2    3.62741  -3.17297   5.33557 5S   117    0.00000
 2566  164 PRO  CA     3.48964  -4.77945   2.48443 5S   117    1.00000
 2567  164 PRO  HA     2.47907  -5.15667   2.43411 5S   117    0.00000
 2568  164 PRO  CB     3.62191  -3.32386   2.01023 5S   117    1.00000
 2569  164 PRO  HB1    2.83093  -3.05584   1.28163 5S   117    0.00000
 2570  164 PRO  HB2    4.61876  -3.14593   1.55068 5S   117    0.00000
 2571  164 PRO  CG     3.50975  -2.47996   3.28307 5S   117    1.00000
 2572  164 PRO  HG1    4.04125  -1.51419   3.19609 5S   117    0.00000
 2573  164 PRO  HG2    2.43966  -2.29158   3.51331 5S   117    0.00000
 2574  164 PRO  C      4.34763  -5.67791   1.63044 5S   117    1.00000
 2575  164 PRO  O      3.90425  -6.04336   0.54537 5S   117    1.00000
 2576  165 GLU  N      5.56505  -6.03864   2.08097 5S   118    1.00000
 2577  165 GLU  HN     5.93265  -5.68777   2.94375 5S   118    0.00000
 2578  165 GLU  CA     6.43676  -6.89917   1.32628 5S   118    1.00000
 2579  165 GLU  HA     5.93551  -7.24558   0.43596 5S   118    0.00000
 2580  165 GLU  CB     7.73929  -6.18851   0.92064 5S   118    1.00000
 2581  165 GLU  HB1    8.34822  -6.86720   0.28795 5S   118    0.00000
 2582  165 GLU  HB2    8.33573  -5.95834   1.82855 5S   118    0.00000
 2583  165 GLU  CG     7.49018  -4.86750   0.17015 5S   118    1.00000
 2584  165 GLU  HG1    8.45062  -4.32563   0.08910 5S   118    0.00000
 2585  165 GLU  HG2    6.78404  -4.22950   0.74278 5S   118    0.00000
 2586  165 GLU  CD     6.93969  -5.08646  -1.23933 5S   118    1.00000
 2587  165 GLU  OE1    7.00630  -6.23058  -1.76159 5S   118    1.00000
 2588  165 GLU  OE2    6.46050  -4.08375  -1.83397 5S   118    1.00000
 2589  165 GLU  C      6.77069  -8.10291   2.14797 5S   118    1.00000
 2590  165 GLU  O      7.92555  -8.51877   2.23366 5S   118    1.00000
 2591  166 ALA  N      5.73984  -8.73485   2.74874 5S   119    1.00000
 2592  166 ALA  HN     4.80594  -8.38572   2.68998 5S   119    0.00000
 2593  166 ALA  CA     5.91850  -9.90675   3.56848 5S   119    1.00000
 2594  166 ALA  HA     6.69844  -9.68690   4.28398 5S   119    0.00000
 2595  166 ALA  CB     4.62366 -10.25453   4.32283 5S   119    1.00000
 2596  166 ALA  HB1    3.78967 -10.44510   3.61755 5S   119    0.00000
 2597  166 ALA  HB2    4.33396  -9.40895   4.98093 5S   119    0.00000
 2598  166 ALA  HB3    4.76582 -11.15268   4.95968 5S   119    0.00000
 2599  166 ALA  C      6.35528 -11.11817   2.77682 5S   119    1.00000
 2600  166 ALA  O      6.84989 -12.08647   3.34702 5S   119    1.00000
 2601  167 GLY  N      6.20779 -11.09279   1.43347 5S   120    1.00000
 2602  167 GLY  HN     5.81572 -10.30021   0.97122 5S   120    0.00000
 2603  167 GLY  CA     6.57290 -12.22021   0.60812 5S   120    1.00000
 2604  167 GLY  HA1    5.88267 -12.23779  -0.21943 5S   120    0.00000
 2605  167 GLY  HA2    6.53207 -13.12121   1.20313 5S   120    0.00000
 2606  167 GLY  C      7.95699 -12.12966   0.04167 5S   120    1.00000
 2607  167 GLY  O      8.42994 -13.09359  -0.55718 5S   120    1.00000
 2608  168 LEU  N      8.65697 -10.98398   0.19973 5S   121    1.00000
 2609  168 LEU  HN     8.29940 -10.19609   0.69634 5S   121    0.00000
 2610  168 LEU  CA     9.97470 -10.83314  -0.36149 5S   121    1.00000
 2611  168 LEU  HA     9.97591 -11.29589  -1.33012 5S   121    0.00000
 2612  168 LEU  CB    10.37834  -9.35672  -0.52248 5S   121    1.00000
 2613  168 LEU  HB1   11.47578  -9.28975  -0.69580 5S   121    0.00000
 2614  168 LEU  HB2   10.14073  -8.81517   0.42038 5S   121    0.00000
 2615  168 LEU  CG     9.70152  -8.62070  -1.69477 5S   121    1.00000
 2616  168 LEU  HG     8.60952  -8.53726  -1.48569 5S   121    0.00000
 2617  168 LEU  CD1   10.28498  -7.20325  -1.79507 5S   121    1.00000
 2618  168 LEU  HD11  11.33632  -7.24810  -2.15047 5S   121    0.00000
 2619  168 LEU  HD12  10.26745  -6.70668  -0.80251 5S   121    0.00000
 2620  168 LEU  HD13   9.68816  -6.59975  -2.50616 5S   121    0.00000
 2621  168 LEU  CD2    9.87475  -9.36603  -3.02872 5S   121    1.00000
 2622  168 LEU  HD21   9.27187 -10.29856  -3.03239 5S   121    0.00000
 2623  168 LEU  HD22  10.94457  -9.63044  -3.17194 5S   121    0.00000
 2624  168 LEU  HD23   9.54203  -8.73080  -3.87486 5S   121    0.00000
 2625  168 LEU  C     11.00039 -11.49609   0.52638 5S   121    1.00000
 2626  168 LEU  O     10.99888 -11.24190   1.73184 5S   121    1.00000
 2627  169 PRO  N     11.90886 -12.32889   0.00441 5S   122    1.00000
 2628  169 PRO  CD    11.86585 -12.90959  -1.34062 5S   122    1.00000
 2629  169 PRO  HD1   12.34176 -12.20401  -2.05518 5S   122    0.00000
 2630  169 PRO  HD2   10.82593 -13.13725  -1.66149 5S   122    0.00000
 2631  169 PRO  CA    13.00342 -12.86446   0.79020 5S   122    1.00000
 2632  169 PRO  HA    12.61808 -13.27650   1.71151 5S   122    0.00000
 2633  169 PRO  CB    13.67904 -13.91260  -0.11575 5S   122    1.00000
 2634  169 PRO  HB1   13.90784 -14.83937   0.44988 5S   122    0.00000
 2635  169 PRO  HB2   14.61610 -13.52433  -0.57220 5S   122    0.00000
 2636  169 PRO  CG    12.67126 -14.19961  -1.23462 5S   122    1.00000
 2637  169 PRO  HG1   13.17193 -14.45765  -2.18927 5S   122    0.00000
 2638  169 PRO  HG2   11.99564 -15.02757  -0.92668 5S   122    0.00000
 2639  169 PRO  C     13.96220 -11.75762   1.11432 5S   122    1.00000
 2640  169 PRO  O     13.99964 -10.75783   0.39720 5S   122    1.00000
 2641  170 TYR  N     14.75497 -11.92509   2.19004 5S   123    1.00000
 2642  170 TYR  HN    14.68001 -12.73608   2.76597 5S   123    0.00000
 2643  170 TYR  CA    15.72885 -10.94554   2.59532 5S   123    1.00000
 2644  170 TYR  HA    15.20482 -10.01232   2.75085 5S   123    0.00000
 2645  170 TYR  CB    16.42548 -11.38320   3.90637 5S   123    1.00000
 2646  170 TYR  HB1   16.91974 -12.36554   3.75907 5S   123    0.00000
 2647  170 TYR  HB2   15.66579 -11.48780   4.71083 5S   123    0.00000
 2648  170 TYR  CG    17.45952 -10.40003   4.37105 5S   123    1.00000
 2649  170 TYR  CD1   17.08311  -9.29972   5.14643 5S   123    1.00000
 2650  170 TYR  HD1   16.04986  -9.16549   5.43035 5S   123    0.00000
 2651  170 TYR  CE1   18.04236  -8.38189   5.57284 5S   123    1.00000
 2652  170 TYR  HE1   17.72760  -7.53591   6.15223 5S   123    0.00000
 2653  170 TYR  CZ    19.38586  -8.54393   5.22287 5S   123    1.00000
 2654  170 TYR  OH    20.33451  -7.59660   5.65477 5S   123    1.00000
 2655  170 TYR  HH    19.86827  -6.95041   6.19002 5S   123    0.00000
 2656  170 TYR  CD2   18.81113 -10.56122   4.01676 5S   123    1.00000
 2657  170 TYR  HD2   19.10626 -11.39725   3.40057 5S   123    0.00000
 2658  170 TYR  CE2   19.77312  -9.63749   4.44124 5S   123    1.00000
 2659  170 TYR  HE2   20.80809  -9.76931   4.16332 5S   123    0.00000
 2660  170 TYR  C     16.74713 -10.76088   1.49278 5S   123    1.00000
 2661  170 TYR  O     17.24221 -11.73080   0.91957 5S   123    1.00000
 2662  171 GLY  N     17.04721  -9.48556   1.16789 5S   124    1.00000
 2663  171 GLY  HN    16.63264  -8.71613   1.65193 5S   124    0.00000
 2664  171 GLY  CA    18.03024  -9.15838   0.16544 5S   124    1.00000
 2665  171 GLY  HA1   18.74210  -9.96726   0.09105 5S   124    0.00000
 2666  171 GLY  HA2   18.48635  -8.23012   0.47377 5S   124    0.00000
 2667  171 GLY  C     17.44046  -8.94187  -1.19745 5S   124    1.00000
 2668  171 GLY  O     18.16240  -8.53921  -2.10699 5S   124    1.00000
 2669  172 ALA  N     16.12224  -9.19455  -1.39308 5S   125    1.00000
 2670  172 ALA  HN    15.53793  -9.52950  -0.65521 5S   125    0.00000
 2671  172 ALA  CA    15.47387  -9.05148  -2.67877 5S   125    1.00000
 2672  172 ALA  HA    16.00965  -9.66631  -3.38982 5S   125    0.00000
 2673  172 ALA  CB    14.00719  -9.51005  -2.62299 5S   125    1.00000
 2674  172 ALA  HB1   13.44660  -8.91276  -1.87184 5S   125    0.00000
 2675  172 ALA  HB2   13.96092 -10.57734  -2.31886 5S   125    0.00000
 2676  172 ALA  HB3   13.51251  -9.40287  -3.61144 5S   125    0.00000
 2677  172 ALA  C     15.50006  -7.62067  -3.16306 5S   125    1.00000
 2678  172 ALA  O     15.23231  -6.68355  -2.41690 5S   125    1.00000
 2679  173 ASN  N     15.85697  -7.41774  -4.44688 5S   126    1.00000
 2680  173 ASN  HN    16.06214  -8.17627  -5.05924 5S   126    0.00000
 2681  173 ASN  CA    16.01030  -6.09639  -5.00106 5S   126    1.00000
 2682  173 ASN  HA    16.40364  -5.43761  -4.23621 5S   126    0.00000
 2683  173 ASN  CB    16.98315  -6.10416  -6.20743 5S   126    1.00000
 2684  173 ASN  HB1   16.64754  -6.86491  -6.94314 5S   126    0.00000
 2685  173 ASN  HB2   17.99342  -6.39171  -5.84636 5S   126    0.00000
 2686  173 ASN  CG    17.08848  -4.72680  -6.88097 5S   126    1.00000
 2687  173 ASN  OD1   17.75829  -3.81789  -6.38249 5S   126    1.00000
 2688  173 ASN  ND2   16.36324  -4.58352  -8.02888 5S   126    1.00000
 2689  173 ASN  HD21  16.35643  -3.70470  -8.50226 5S   126    0.00000
 2690  173 ASN  HD22  15.80407  -5.34547  -8.35589 5S   126    0.00000
 2691  173 ASN  C     14.65921  -5.58922  -5.42677 5S   126    1.00000
 2692  173 ASN  O     13.94085  -6.24406  -6.18134 5S   126    1.00000
 2693  174 LYS  N     14.31950  -4.37802  -4.94778 5S   127    1.00000
 2694  174 LYS  HN    14.90892  -3.85724  -4.33459 5S   127    0.00000
 2695  174 LYS  CA    13.09995  -3.73327  -5.30345 5S   127    1.00000
 2696  174 LYS  HA    12.98284  -3.76477  -6.38270 5S   127    0.00000
 2697  174 LYS  CB    11.88234  -4.36077  -4.60171 5S   127    1.00000
 2698  174 LYS  HB1   11.94578  -4.17651  -3.50916 5S   127    0.00000
 2699  174 LYS  HB2   11.93217  -5.46194  -4.75950 5S   127    0.00000
 2700  174 LYS  CG    10.52314  -3.88828  -5.12136 5S   127    1.00000
 2701  174 LYS  HG1   10.52313  -3.91321  -6.23482 5S   127    0.00000
 2702  174 LYS  HG2   10.34355  -2.83916  -4.79945 5S   127    0.00000
 2703  174 LYS  CD     9.39520  -4.78758  -4.60322 5S   127    1.00000
 2704  174 LYS  HD1    9.34417  -4.68867  -3.49586 5S   127    0.00000
 2705  174 LYS  HD2    9.64827  -5.84576  -4.84478 5S   127    0.00000
 2706  174 LYS  CE     8.04446  -4.43068  -5.22150 5S   127    1.00000
 2707  174 LYS  HE1    8.10205  -4.52320  -6.32728 5S   127    0.00000
 2708  174 LYS  HE2    7.76932  -3.39056  -4.94819 5S   127    0.00000
 2709  174 LYS  NZ     6.97085  -5.33116  -4.74260 5S   127    1.00000
 2710  174 LYS  HZ1    6.88277  -5.25854  -3.70412 5S   127    0.00000
 2711  174 LYS  HZ2    7.19367  -6.31353  -4.99937 5S   127    0.00000
 2712  174 LYS  HZ3    6.07177  -5.05355  -5.18454 5S   127    0.00000
 2713  174 LYS  C     13.27461  -2.32107  -4.84159 5S   127    1.00000
 2714  174 LYS  O     13.76355  -2.03633  -3.75386 5S   127    1.00000
 2715  175 ASP  N     12.82080  -1.41315  -5.73522 5S   128    1.00000
 2716  175 ASP  HN    12.43136  -1.72871  -6.59827 5S   128    0.00000
 2717  175 ASP  CA    12.87591   0.02275  -5.63887 5S   128    1.00000
 2718  175 ASP  HA    13.89779   0.28404  -5.40103 5S   128    0.00000
 2719  175 ASP  CB    12.45690   0.76709  -6.95366 5S   128    1.00000
 2720  175 ASP  HB1   13.26642   1.46896  -7.24332 5S   128    0.00000
 2721  175 ASP  HB2   11.53341   1.36650  -6.79943 5S   128    0.00000
 2722  175 ASP  CG    12.19885  -0.17665  -8.13823 5S   128    0.00000
 2723  175 ASP  OD1   11.03857  -0.22530  -8.60953 5S   128    0.00000
 2724  175 ASP  OD2   13.16693  -0.86166  -8.58018 5S   128    0.00000
 2725  175 ASP  C     11.98473   0.45263  -4.50468 5S   128    1.00000
 2726  175 ASP  O     10.83025   0.03458  -4.41418 5S   128    1.00000
 2727  176 GLY  N     12.53049   1.27690  -3.58273 5S   129    1.00000
 2728  176 GLY  HN    13.43467   1.67362  -3.72054 5S   129    0.00000
 2729  176 GLY  CA    11.81335   1.68261  -2.40517 5S   129    1.00000
 2730  176 GLY  HA1   10.76536   1.77886  -2.65567 5S   129    0.00000
 2731  176 GLY  HA2   12.25253   2.61132  -2.07792 5S   129    0.00000
 2732  176 GLY  C     11.93364   0.70021  -1.27882 5S   129    1.00000
 2733  176 GLY  O     11.30093   0.90864  -0.25247 5S   129    1.00000
 2734  177 ILE  N     12.72485  -0.38994  -1.42927 5S   130    1.00000
 2735  177 ILE  HN    13.20950  -0.57193  -2.28263 5S   130    0.00000
 2736  177 ILE  CA    12.89734  -1.39182  -0.40176 5S   130    1.00000
 2737  177 ILE  HA    12.47264  -1.03753   0.51878 5S   130    0.00000
 2738  177 ILE  CB    12.27116  -2.74151  -0.74632 5S   130    1.00000
 2739  177 ILE  HB    12.69566  -3.10906  -1.70653 5S   130    0.00000
 2740  177 ILE  CG2   12.58340  -3.78279   0.35283 5S   130    1.00000
 2741  177 ILE  HG21  12.33296  -3.37034   1.35228 5S   130    0.00000
 2742  177 ILE  HG22  13.65603  -4.06274   0.34524 5S   130    0.00000
 2743  177 ILE  HG23  11.97946  -4.70027   0.18840 5S   130    0.00000
 2744  177 ILE  CG1   10.74652  -2.60159  -0.94500 5S   130    1.00000
 2745  177 ILE  HG11  10.34192  -3.56564  -1.32321 5S   130    0.00000
 2746  177 ILE  HG12  10.53869  -1.82244  -1.71000 5S   130    0.00000
 2747  177 ILE  CD    10.01588  -2.24393   0.34403 5S   130    1.00000
 2748  177 ILE  HD1   10.39922  -1.29040   0.74536 5S   130    0.00000
 2749  177 ILE  HD2   10.15871  -3.02682   1.11449 5S   130    0.00000
 2750  177 ILE  HD3    8.92935  -2.14112   0.15380 5S   130    0.00000
 2751  177 ILE  C     14.36848  -1.56121  -0.17897 5S   130    1.00000
 2752  177 ILE  O     15.09486  -1.99978  -1.06848 5S   130    1.00000
 2753  178 ILE  N     14.84177  -1.22430   1.04164 5S   131    1.00000
 2754  178 ILE  HN    14.26014  -0.78930   1.72741 5S   131    0.00000
 2755  178 ILE  CA    16.19417  -1.51489   1.45163 5S   131    1.00000
 2756  178 ILE  HA    16.72984  -1.99656   0.64635 5S   131    0.00000
 2757  178 ILE  CB    16.96367  -0.27734   1.87351 5S   131    1.00000
 2758  178 ILE  HB    18.03128  -0.55228   2.03872 5S   131    0.00000
 2759  178 ILE  CG2   16.89236   0.75922   0.73482 5S   131    1.00000
 2760  178 ILE  HG21  15.92513   1.30649   0.77340 5S   131    0.00000
 2761  178 ILE  HG22  16.99473   0.28198  -0.25945 5S   131    0.00000
 2762  178 ILE  HG23  17.70715   1.49474   0.85418 5S   131    0.00000
 2763  178 ILE  CG1   16.39847   0.34330   3.16041 5S   131    1.00000
 2764  178 ILE  HG11  16.00897  -0.42512   3.85479 5S   131    0.00000
 2765  178 ILE  HG12  15.54548   1.00609   2.89200 5S   131    0.00000
 2766  178 ILE  CD    17.42983   1.11661   3.95344 5S   131    1.00000
 2767  178 ILE  HD1   17.80473   1.95997   3.34335 5S   131    0.00000
 2768  178 ILE  HD2   18.27760   0.45502   4.23194 5S   131    0.00000
 2769  178 ILE  HD3   16.96198   1.51213   4.88020 5S   131    0.00000
 2770  178 ILE  C     16.11858  -2.50365   2.58440 5S   131    1.00000
 2771  178 ILE  O     15.13288  -2.54157   3.31409 5S   131    1.00000
 2772  179 TRP  N     17.16404  -3.33383   2.76118 5S   132    1.00000
 2773  179 TRP  HN    17.96556  -3.29144   2.17166 5S   132    0.00000
 2774  179 TRP  CA    17.15940  -4.38331   3.75355 5S   132    1.00000
 2775  179 TRP  HA    16.18981  -4.45193   4.22889 5S   132    0.00000
 2776  179 TRP  CB    17.49493  -5.74880   3.13522 5S   132    1.00000
 2777  179 TRP  HB1   17.62179  -6.50910   3.92739 5S   132    0.00000
 2778  179 TRP  HB2   18.44527  -5.66795   2.56175 5S   132    0.00000
 2779  179 TRP  CG    16.41199  -6.22068   2.20277 5S   132    1.00000
 2780  179 TRP  CD1   16.34756  -6.03672   0.85534 5S   132    1.00000
 2781  179 TRP  HD1   17.10914  -5.55189   0.26207 5S   132    0.00000
 2782  179 TRP  NE1   15.18710  -6.57058   0.36315 5S   132    1.00000
 2783  179 TRP  HE1   14.93836  -6.59813  -0.58366 5S   132    0.00000
 2784  179 TRP  CE2   14.47096  -7.11653   1.39385 5S   132    1.00000
 2785  179 TRP  CD2   15.20610  -6.91507   2.57682 5S   132    1.00000
 2786  179 TRP  CE3   14.72179  -7.36316   3.80031 5S   132    1.00000
 2787  179 TRP  HE3   15.25355  -7.20002   4.71950 5S   132    0.00000
 2788  179 TRP  CZ3   13.47678  -8.01133   3.82124 5S   132    1.00000
 2789  179 TRP  HZ3   13.06156  -8.33682   4.76275 5S   132    0.00000
 2790  179 TRP  CZ2   13.24819  -7.76904   1.40885 5S   132    1.00000
 2791  179 TRP  HZ2   12.69050  -7.93326   0.50285 5S   132    0.00000
 2792  179 TRP  CH2   12.75151  -8.21608   2.63906 5S   132    1.00000
 2793  179 TRP  HH2   11.79849  -8.72326   2.67291 5S   132    0.00000
 2794  179 TRP  C     18.16444  -4.09038   4.82196 5S   132    1.00000
 2795  179 TRP  O     19.24512  -3.56500   4.55864 5S   132    1.00000
 2796  180 VAL  N     17.79697  -4.43271   6.07635 5S   133    1.00000
 2797  180 VAL  HN    16.89993  -4.83658   6.25823 5S   133    0.00000
 2798  180 VAL  CA    18.62697  -4.22510   7.23597 5S   133    1.00000
 2799  180 VAL  HA    19.65327  -4.09679   6.92186 5S   133    0.00000
 2800  180 VAL  CB    18.19345  -3.03180   8.07625 5S   133    1.00000
 2801  180 VAL  HB    18.82061  -2.96558   8.99495 5S   133    0.00000
 2802  180 VAL  CG1   18.39369  -1.74621   7.25782 5S   133    1.00000
 2803  180 VAL  HG11  17.78172  -1.76644   6.33164 5S   133    0.00000
 2804  180 VAL  HG12  19.46111  -1.62814   6.97895 5S   133    0.00000
 2805  180 VAL  HG13  18.07424  -0.86589   7.85277 5S   133    0.00000
 2806  180 VAL  CG2   16.72148  -3.16246   8.49478 5S   133    1.00000
 2807  180 VAL  HG21  16.52299  -4.14082   8.97475 5S   133    0.00000
 2808  180 VAL  HG22  16.05417  -3.05292   7.61339 5S   133    0.00000
 2809  180 VAL  HG23  16.47034  -2.37074   9.22981 5S   133    0.00000
 2810  180 VAL  C     18.57389  -5.47308   8.07370 5S   133    1.00000
 2811  180 VAL  O     17.59599  -6.21689   8.05152 5S   133    1.00000
 2812  181 ALA  N     19.65085  -5.73299   8.84061 5S   134    1.00000
 2813  181 ALA  HN    20.42918  -5.11261   8.87703 5S   134    0.00000
 2814  181 ALA  CA    19.72498  -6.90403   9.67237 5S   134    1.00000
 2815  181 ALA  HA    18.82492  -6.96066  10.26481 5S   134    0.00000
 2816  181 ALA  CB    19.92410  -8.20368   8.87108 5S   134    1.00000
 2817  181 ALA  HB1   20.91353  -8.22339   8.36884 5S   134    0.00000
 2818  181 ALA  HB2   19.15334  -8.26182   8.07837 5S   134    0.00000
 2819  181 ALA  HB3   19.81843  -9.09778   9.52020 5S   134    0.00000
 2820  181 ALA  C     20.88985  -6.73955  10.59501 5S   134    1.00000
 2821  181 ALA  O     21.97726  -6.37118  10.16361 5S   134    1.00000
 2822  182 THR  N     20.67614  -7.01474  11.89749 5S   135    1.00000
 2823  182 THR  HN    19.76528  -7.27159  12.22037 5S   135    0.00000
 2824  182 THR  CA    21.68257  -6.93996  12.92958 5S   135    1.00000
 2825  182 THR  HA    22.40567  -6.18309  12.66273 5S   135    0.00000
 2826  182 THR  CB    21.07956  -6.60644  14.28625 5S   135    1.00000
 2827  182 THR  HB    20.49970  -7.47285  14.67159 5S   135    0.00000
 2828  182 THR  OG1   20.20792  -5.49314  14.14985 5S   135    1.00000
 2829  182 THR  HG1   19.79972  -5.36416  15.00945 5S   135    0.00000
 2830  182 THR  CG2   22.14930  -6.22523  15.32076 5S   135    1.00000
 2831  182 THR  HG21  22.82601  -5.45257  14.89868 5S   135    0.00000
 2832  182 THR  HG22  22.74389  -7.11507  15.61194 5S   135    0.00000
 2833  182 THR  HG23  21.66974  -5.82208  16.23830 5S   135    0.00000
 2834  182 THR  C     22.37254  -8.27290  12.98960 5S   135    1.00000
 2835  182 THR  O     21.80633  -9.29783  12.61063 5S   135    1.00000
 2836  183 GLU  N     23.63355  -8.27528  13.47549 5S   136    1.00000
 2837  183 GLU  HN    24.06868  -7.42148  13.75171 5S   136    0.00000
 2838  183 GLU  CA    24.45146  -9.44577  13.65756 5S   136    1.00000
 2839  183 GLU  HA    24.65550  -9.85349  12.67811 5S   136    0.00000
 2840  183 GLU  CB    25.78010  -9.05157  14.34314 5S   136    1.00000
 2841  183 GLU  HB1   25.54720  -8.61227  15.33989 5S   136    0.00000
 2842  183 GLU  HB2   26.26556  -8.25181  13.73935 5S   136    0.00000
 2843  183 GLU  CG    26.78422 -10.19982  14.54840 5S   136    1.00000
 2844  183 GLU  HG1   26.30568 -11.03405  15.10147 5S   136    0.00000
 2845  183 GLU  HG2   27.63714  -9.82313  15.15313 5S   136    0.00000
 2846  183 GLU  CD    27.31146 -10.71112  13.20990 5S   136    1.00000
 2847  183 GLU  OE1   26.65091 -11.60102  12.61037 5S   136    1.00000
 2848  183 GLU  OE2   28.38633 -10.21972  12.77409 5S   136    1.00000
 2849  183 GLU  C     23.74824 -10.49689  14.49008 5S   136    1.00000
 2850  183 GLU  O     23.40783 -10.26771  15.65039 5S   136    1.00000
 2851  184 GLY  N     23.49389 -11.67443  13.87330 5S   137    1.00000
 2852  184 GLY  HN    23.76967 -11.81992  12.92524 5S   137    0.00000
 2853  184 GLY  CA    22.91811 -12.80916  14.55709 5S   137    1.00000
 2854  184 GLY  HA1   23.10362 -12.70594  15.61673 5S   137    0.00000
 2855  184 GLY  HA2   23.38031 -13.69012  14.14045 5S   137    0.00000
 2856  184 GLY  C     21.43360 -12.94190  14.37983 5S   137    1.00000
 2857  184 GLY  O     20.78031 -13.56106  15.21678 5S   137    1.00000
 2858  185 ALA  N     20.84826 -12.39023  13.29292 5S   138    1.00000
 2859  185 ALA  HN    21.36252 -11.88454  12.60445 5S   138    0.00000
 2860  185 ALA  CA    19.42358 -12.47737  13.08106 5S   138    1.00000
 2861  185 ALA  HA    18.92444 -12.63768  14.02486 5S   138    0.00000
 2862  185 ALA  CB    18.85449 -11.19460  12.46862 5S   138    1.00000
 2863  185 ALA  HB1   19.33271 -10.97761  11.48961 5S   138    0.00000
 2864  185 ALA  HB2   19.05551 -10.33997  13.14962 5S   138    0.00000
 2865  185 ALA  HB3   17.75547 -11.27423  12.32809 5S   138    0.00000
 2866  185 ALA  C     19.10517 -13.63491  12.17931 5S   138    1.00000
 2867  185 ALA  O     19.86530 -13.96787  11.27097 5S   138    1.00000
 2868  186 LEU  N     17.94898 -14.28751  12.42841 5S   139    1.00000
 2869  186 LEU  HN    17.34635 -14.01827  13.17661 5S   139    0.00000
 2870  186 LEU  CA    17.52348 -15.42975  11.66287 5S   139    1.00000
 2871  186 LEU  HA    18.39014 -15.95510  11.28859 5S   139    0.00000
 2872  186 LEU  CB    16.64651 -16.38882  12.49056 5S   139    1.00000
 2873  186 LEU  HB1   16.20775 -17.16420  11.82475 5S   139    0.00000
 2874  186 LEU  HB2   15.81281 -15.81452  12.95176 5S   139    0.00000
 2875  186 LEU  CG    17.40402 -17.12773  13.61048 5S   139    1.00000
 2876  186 LEU  HG    17.78800 -16.37510  14.33509 5S   139    0.00000
 2877  186 LEU  CD1   16.44211 -18.06642  14.35550 5S   139    1.00000
 2878  186 LEU  HD11  16.02959 -18.81818  13.64987 5S   139    0.00000
 2879  186 LEU  HD12  15.60026 -17.48874  14.79147 5S   139    0.00000
 2880  186 LEU  HD13  16.97448 -18.59487  15.17410 5S   139    0.00000
 2881  186 LEU  CD2   18.61653 -17.90257  13.07508 5S   139    1.00000
 2882  186 LEU  HD21  19.40844 -17.19634  12.74686 5S   139    0.00000
 2883  186 LEU  HD22  18.31503 -18.53138  12.21179 5S   139    0.00000
 2884  186 LEU  HD23  19.03734 -18.55313  13.87029 5S   139    0.00000
 2885  186 LEU  C     16.72050 -14.97769  10.48317 5S   139    1.00000
 2886  186 LEU  O     15.90458 -14.06583  10.58207 5S   139    1.00000
 2887  187 ASN  N     16.93363 -15.63910   9.32502 5S   140    1.00000
 2888  187 ASN  HN    17.60206 -16.37753   9.27391 5S   140    0.00000
 2889  187 ASN  CA    16.28172 -15.30857   8.08138 5S   140    1.00000
 2890  187 ASN  HA    16.08686 -14.24510   8.06536 5S   140    0.00000
 2891  187 ASN  CB    17.20671 -15.67741   6.90083 5S   140    1.00000
 2892  187 ASN  HB1   17.26898 -16.77998   6.78171 5S   140    0.00000
 2893  187 ASN  HB2   18.22923 -15.30127   7.13026 5S   140    0.00000
 2894  187 ASN  CG    16.74137 -15.04486   5.58648 5S   140    1.00000
 2895  187 ASN  OD1   15.57083 -14.71769   5.36822 5S   140    1.00000
 2896  187 ASN  ND2   17.72542 -14.88034   4.66314 5S   140    1.00000
 2897  187 ASN  HD21  17.46108 -14.63531   3.72739 5S   140    0.00000
 2898  187 ASN  HD22  18.67880 -15.05597   4.89890 5S   140    0.00000
 2899  187 ASN  C     14.96288 -16.04504   7.99398 5S   140    1.00000
 2900  187 ASN  O     14.74372 -16.87861   7.11539 5S   140    1.00000
 2901  188 THR  N     14.04750 -15.73730   8.93416 5S   141    1.00000
 2902  188 THR  HN    14.26203 -15.07611   9.65002 5S   141    0.00000
 2903  188 THR  CA    12.76319 -16.38429   9.02327 5S   141    1.00000
 2904  188 THR  HA    12.61776 -16.97823   8.13444 5S   141    0.00000
 2905  188 THR  CB    12.63279 -17.26488  10.26475 5S   141    1.00000
 2906  188 THR  HB    11.64144 -17.77050  10.26257 5S   141    0.00000
 2907  188 THR  OG1   12.76376 -16.51884  11.47204 5S   141    1.00000
 2908  188 THR  HG1   12.48439 -17.10708  12.17669 5S   141    0.00000
 2909  188 THR  CG2   13.73131 -18.34267  10.24784 5S   141    1.00000
 2910  188 THR  HG21  14.74066 -17.88097  10.27333 5S   141    0.00000
 2911  188 THR  HG22  13.65040 -18.96529   9.33262 5S   141    0.00000
 2912  188 THR  HG23  13.62997 -18.99978  11.13713 5S   141    0.00000
 2913  188 THR  C     11.69517 -15.32006   9.05706 5S   141    1.00000
 2914  188 THR  O     11.95900 -14.22691   9.55123 5S   141    1.00000
 2915  189 PRO  N     10.47746 -15.56588   8.59262 5S   142    1.00000
 2916  189 PRO  CD    10.06436 -16.78927   7.90130 5S   142    1.00000
 2917  189 PRO  HD1   10.44887 -17.70094   8.40580 5S   142    0.00000
 2918  189 PRO  HD2   10.42716 -16.75110   6.85071 5S   142    0.00000
 2919  189 PRO  CA     9.38704 -14.61590   8.71856 5S   142    1.00000
 2920  189 PRO  HA     9.69499 -13.66237   8.31271 5S   142    0.00000
 2921  189 PRO  CB     8.22746 -15.25235   7.94185 5S   142    1.00000
 2922  189 PRO  HB1    8.23702 -14.88168   6.89385 5S   142    0.00000
 2923  189 PRO  HB2    7.23499 -15.04164   8.39041 5S   142    0.00000
 2924  189 PRO  CG     8.53995 -16.75128   7.94465 5S   142    1.00000
 2925  189 PRO  HG1    8.18975 -17.19436   8.90350 5S   142    0.00000
 2926  189 PRO  HG2    8.07438 -17.28008   7.09125 5S   142    0.00000
 2927  189 PRO  C      9.00030 -14.41632  10.16378 5S   142    1.00000
 2928  189 PRO  O      8.81541 -15.38802  10.89579 5S   142    1.00000
 2929  190 LYS  N      8.88444 -13.14296  10.58720 5S   143    1.00000
 2930  190 LYS  HN     9.10156 -12.38151   9.97427 5S   143    0.00000
 2931  190 LYS  CA     8.55488 -12.76917  11.93657 5S   143    1.00000
 2932  190 LYS  HA     8.85957 -13.56315  12.60435 5S   143    0.00000
 2933  190 LYS  CB     9.24882 -11.45677  12.36533 5S   143    1.00000
 2934  190 LYS  HB1    9.13406 -11.32916  13.46451 5S   143    0.00000
 2935  190 LYS  HB2    8.78027 -10.58710  11.85349 5S   143    0.00000
 2936  190 LYS  CG    10.74533 -11.44299  12.02847 5S   143    1.00000
 2937  190 LYS  HG1   11.20994 -10.52789  12.45734 5S   143    0.00000
 2938  190 LYS  HG2   10.87287 -11.39211  10.92365 5S   143    0.00000
 2939  190 LYS  CD    11.47940 -12.67861  12.55791 5S   143    1.00000
 2940  190 LYS  HD1   10.99972 -13.60154  12.16092 5S   143    0.00000
 2941  190 LYS  HD2   11.39909 -12.69761  13.66678 5S   143    0.00000
 2942  190 LYS  CE    12.93287 -12.69888  12.11487 5S   143    1.00000
 2943  190 LYS  HE1   13.47289 -11.83042  12.53843 5S   143    0.00000
 2944  190 LYS  HE2   13.01256 -12.65678  11.00997 5S   143    0.00000
 2945  190 LYS  NZ    13.58931 -13.93564  12.57272 5S   143    1.00000
 2946  190 LYS  HZ1   13.12823 -14.77771  12.16708 5S   143    0.00000
 2947  190 LYS  HZ2   13.55756 -13.97647  13.61251 5S   143    0.00000
 2948  190 LYS  HZ3   14.58736 -13.90708  12.27347 5S   143    0.00000
 2949  190 LYS  C      7.07222 -12.62619  12.03845 5S   143    1.00000
 2950  190 LYS  O      6.53308 -11.53929  12.23910 5S   143    1.00000
 2951  191 ASP  N      6.36654 -13.76741  11.91846 5S   144    1.00000
 2952  191 ASP  HN     6.82292 -14.63977  11.74435 5S   144    0.00000
 2953  191 ASP  CA     4.92774 -13.79765  11.91946 5S   144    1.00000
 2954  191 ASP  HA     4.57442 -12.99950  11.28034 5S   144    0.00000
 2955  191 ASP  CB     4.38761 -15.15647  11.41435 5S   144    1.00000
 2956  191 ASP  HB1    3.29036 -15.21411  11.57606 5S   144    0.00000
 2957  191 ASP  HB2    4.87964 -15.98326  11.96992 5S   144    0.00000
 2958  191 ASP  CG     4.65465 -15.33694   9.91738 5S   144    1.00000
 2959  191 ASP  OD1    4.62056 -14.32407   9.17003 5S   144    1.00000
 2960  191 ASP  OD2    4.88173 -16.50458   9.50338 5S   144    1.00000
 2961  191 ASP  C      4.37755 -13.52712  13.29875 5S   144    1.00000
 2962  191 ASP  O      3.25733 -13.04009  13.43283 5S   144    1.00000
 2963  192 HSD  N      5.16653 -13.79301  14.36699 5S   145    1.00000
 2964  192 HSD  HN     6.07981 -14.17938  14.25648 5S   145    0.00000
 2965  192 HSD  CA     4.72682 -13.56487  15.72554 5S   145    1.00000
 2966  192 HSD  HA     3.69664 -13.88330  15.79233 5S   145    0.00000
 2967  192 HSD  CB     5.54238 -14.39890  16.73831 5S   145    1.00000
 2968  192 HSD  HB1    5.50412 -15.46556  16.42559 5S   145    0.00000
 2969  192 HSD  HB2    5.07856 -14.32382  17.74468 5S   145    0.00000
 2970  192 HSD  ND1    7.99767 -14.62958  16.14302 5S   145    1.00000
 2971  192 HSD  HD1    7.89016 -15.40496  15.51942 5S   145    0.00000
 2972  192 HSD  CG     6.98599 -14.01143  16.84503 5S   145    1.00000
 2973  192 HSD  CE1    9.14984 -14.01475  16.49316 5S   145    1.00000
 2974  192 HSD  HE1   10.12257 -14.31518  16.10531 5S   145    0.00000
 2975  192 HSD  NE2    8.94630 -13.04750  17.36346 5S   145    1.00000
 2976  192 HSD  CD2    7.58344 -13.04397  17.58816 5S   145    1.00000
 2977  192 HSD  HD2    7.15137 -12.32466  18.27436 5S   145    0.00000
 2978  192 HSD  C      4.76277 -12.10363  16.12705 5S   145    1.00000
 2979  192 HSD  O      4.23190 -11.73940  17.17568 5S   145    1.00000
 2980  193 ILE  N      5.37845 -11.23031  15.29674 5S   146    1.00000
 2981  193 ILE  HN     5.83069 -11.54590  14.46443 5S   146    0.00000
 2982  193 ILE  CA     5.42490  -9.80466  15.53243 5S   146    1.00000
 2983  193 ILE  HA     5.19213  -9.60455  16.56822 5S   146    0.00000
 2984  193 ILE  CB     6.80458  -9.23937  15.22694 5S   146    1.00000
 2985  193 ILE  HB     7.13524  -9.58571  14.22101 5S   146    0.00000
 2986  193 ILE  CG2    6.78204  -7.69724  15.23308 5S   146    1.00000
 2987  193 ILE  HG21   6.44637  -7.32104  16.22159 5S   146    0.00000
 2988  193 ILE  HG22   6.11310  -7.30328  14.44379 5S   146    0.00000
 2989  193 ILE  HG23   7.79261  -7.29741  15.02376 5S   146    0.00000
 2990  193 ILE  CG1    7.81264  -9.78119  16.26313 5S   146    1.00000
 2991  193 ILE  HG11   7.86802 -10.88632  16.16582 5S   146    0.00000
 2992  193 ILE  HG12   7.44802  -9.54379  17.28768 5S   146    0.00000
 2993  193 ILE  CD     9.21912  -9.20758  16.09283 5S   146    1.00000
 2994  193 ILE  HD1    9.24892  -8.13618  16.38355 5S   146    0.00000
 2995  193 ILE  HD2    9.55509  -9.30630  15.03897 5S   146    0.00000
 2996  193 ILE  HD3    9.92672  -9.75163  16.74270 5S   146    0.00000
 2997  193 ILE  C      4.35003  -9.12793  14.71917 5S   146    1.00000
 2998  193 ILE  O      3.55485  -8.36282  15.26640 5S   146    1.00000
 2999  194 GLY  N      4.31309  -9.38147  13.38835 5S   147    1.00000
 3000  194 GLY  HN     4.96635 -10.00810  12.96958 5S   147    0.00000
 3001  194 GLY  CA     3.30767  -8.84434  12.49528 5S   147    1.00000
 3002  194 GLY  HA1    2.33568  -9.11721  12.88204 5S   147    0.00000
 3003  194 GLY  HA2    3.50511  -9.25586  11.51763 5S   147    0.00000
 3004  194 GLY  C      3.36479  -7.35195  12.36122 5S   147    1.00000
 3005  194 GLY  O      4.33686  -6.70203  12.73424 5S   147    1.00000
 3006  195 THR  N      2.28344  -6.77959  11.80320 5S   148    1.00000
 3007  195 THR  HN     1.53366  -7.33383  11.45082 5S   148    0.00000
 3008  195 THR  CA     2.10953  -5.35820  11.63769 5S   148    1.00000
 3009  195 THR  HA     3.08042  -4.88954  11.54332 5S   148    0.00000
 3010  195 THR  CB     1.27840  -5.04938  10.40022 5S   148    1.00000
 3011  195 THR  HB     1.06637  -3.96553  10.31278 5S   148    0.00000
 3012  195 THR  OG1    0.03495  -5.74242  10.42231 5S   148    1.00000
 3013  195 THR  HG1   -0.48193  -5.33081  11.11959 5S   148    0.00000
 3014  195 THR  CG2    2.06774  -5.48295   9.14979 5S   148    1.00000
 3015  195 THR  HG21   2.27817  -6.57272   9.16855 5S   148    0.00000
 3016  195 THR  HG22   3.03205  -4.93545   9.08981 5S   148    0.00000
 3017  195 THR  HG23   1.47859  -5.25936   8.23492 5S   148    0.00000
 3018  195 THR  C      1.45115  -4.79619  12.87722 5S   148    1.00000
 3019  195 THR  O      1.16392  -5.51688  13.83188 5S   148    1.00000
 3020  196 ARG  N      1.21008  -3.47085  12.88802 5S   149    1.00000
 3021  196 ARG  HN     1.44089  -2.88949  12.10807 5S   149    0.00000
 3022  196 ARG  CA     0.61521  -2.79903  14.01169 5S   149    1.00000
 3023  196 ARG  HA     0.54834  -3.45830  14.86522 5S   149    0.00000
 3024  196 ARG  CB     1.43745  -1.55944  14.39605 5S   149    1.00000
 3025  196 ARG  HB1    1.57705  -0.92367  13.49492 5S   149    0.00000
 3026  196 ARG  HB2    2.44497  -1.90335  14.71607 5S   149    0.00000
 3027  196 ARG  CG     0.84422  -0.71812  15.53185 5S   149    1.00000
 3028  196 ARG  HG1    0.80489  -1.33623  16.45538 5S   149    0.00000
 3029  196 ARG  HG2   -0.19496  -0.41074  15.28250 5S   149    0.00000
 3030  196 ARG  CD     1.66455   0.53456  15.81482 5S   149    1.00000
 3031  196 ARG  HD1    2.72269   0.27644  16.01954 5S   149    0.00000
 3032  196 ARG  HD2    1.25490   1.07102  16.69155 5S   149    0.00000
 3033  196 ARG  NE     1.62835   1.41719  14.60553 5S   149    1.00000
 3034  196 ARG  HE     2.30717   1.26128  13.88159 5S   149    0.00000
 3035  196 ARG  CZ     0.80322   2.49216  14.49237 5S   149    1.00000
 3036  196 ARG  NH1   -0.11757   2.76856  15.44223 5S   149    1.00000
 3037  196 ARG  HH11  -0.68059   3.58704  15.37724 5S   149    0.00000
 3038  196 ARG  HH12  -0.26830   2.10469  16.17977 5S   149    0.00000
 3039  196 ARG  NH2    0.91027   3.31884  13.42537 5S   149    1.00000
 3040  196 ARG  HH21   1.43859   3.00963  12.63189 5S   149    0.00000
 3041  196 ARG  HH22   0.30832   4.10861  13.34665 5S   149    0.00000
 3042  196 ARG  C     -0.76721  -2.37484  13.62622 5S   149    1.00000
 3043  196 ARG  O     -0.99364  -1.92083  12.50669 5S   149    1.00000
 3044  197 ASN  N     -1.72645  -2.51315  14.57107 5S   150    1.00000
 3045  197 ASN  HN    -1.53113  -2.93999  15.45152 5S   150    0.00000
 3046  197 ASN  CA    -3.06950  -2.02652  14.40100 5S   150    1.00000
 3047  197 ASN  HA    -3.28938  -1.96393  13.34772 5S   150    0.00000
 3048  197 ASN  CB    -4.09002  -2.98843  15.05374 5S   150    1.00000
 3049  197 ASN  HB1   -4.05378  -2.92238  16.16033 5S   150    0.00000
 3050  197 ASN  HB2   -3.80869  -4.02509  14.76404 5S   150    0.00000
 3051  197 ASN  CG    -5.51773  -2.71333  14.56145 5S   150    1.00000
 3052  197 ASN  OD1   -5.85969  -1.61096  14.12127 5S   150    1.00000
 3053  197 ASN  ND2   -6.37109  -3.77424  14.63415 5S   150    1.00000
 3054  197 ASN  HD21  -7.28640  -3.69536  14.24428 5S   150    0.00000
 3055  197 ASN  HD22  -6.09016  -4.59875  15.12468 5S   150    0.00000
 3056  197 ASN  C     -3.14224  -0.66918  15.06553 5S   150    1.00000
 3057  197 ASN  O     -3.03361  -0.62470  16.29077 5S   150    1.00000
 3058  198 PRO  N     -3.34417   0.45144  14.36045 5S   151    1.00000
 3059  198 PRO  CD    -3.29581   0.53026  12.89578 5S   151    1.00000
 3060  198 PRO  HD1   -4.29121   0.24957  12.49056 5S   151    0.00000
 3061  198 PRO  HD2   -2.51563  -0.12727  12.46091 5S   151    0.00000
 3062  198 PRO  CA    -3.36768   1.77525  14.96978 5S   151    1.00000
 3063  198 PRO  HA    -2.45180   1.90437  15.51775 5S   151    0.00000
 3064  198 PRO  CB    -3.52391   2.74387  13.78615 5S   151    1.00000
 3065  198 PRO  HB1   -2.97288   3.69125  13.95168 5S   151    0.00000
 3066  198 PRO  HB2   -4.59699   2.96693  13.59238 5S   151    0.00000
 3067  198 PRO  CG    -2.96668   1.98519  12.58094 5S   151    1.00000
 3068  198 PRO  HG1   -3.42454   2.32042  11.62836 5S   151    0.00000
 3069  198 PRO  HG2   -1.86285   2.11320  12.53536 5S   151    0.00000
 3070  198 PRO  C     -4.49335   1.96662  15.95052 5S   151    1.00000
 3071  198 PRO  O     -4.42509   2.89786  16.74944 5S   151    1.00000
 3072  199 ALA  N     -5.52235   1.09535  15.92114 5S   152    1.00000
 3073  199 ALA  HN    -5.56428   0.36260  15.24214 5S   152    0.00000
 3074  199 ALA  CA    -6.62707   1.17138  16.83768 5S   152    1.00000
 3075  199 ALA  HA    -6.87232   2.21300  16.98825 5S   152    0.00000
 3076  199 ALA  CB    -7.85432   0.44708  16.26021 5S   152    1.00000
 3077  199 ALA  HB1   -7.62529  -0.62108  16.05866 5S   152    0.00000
 3078  199 ALA  HB2   -8.14804   0.92597  15.30083 5S   152    0.00000
 3079  199 ALA  HB3   -8.71489   0.50905  16.95924 5S   152    0.00000
 3080  199 ALA  C     -6.29668   0.58296  18.19108 5S   152    1.00000
 3081  199 ALA  O     -6.98523   0.87802  19.16599 5S   152    1.00000
 3082  200 ASN  N     -5.24122  -0.26072  18.28929 5S   153    1.00000
 3083  200 ASN  HN    -4.67365  -0.47251  17.49517 5S   153    0.00000
 3084  200 ASN  CA    -4.92147  -0.96875  19.51167 5S   153    1.00000
 3085  200 ASN  HA    -5.65501  -0.74039  20.27236 5S   153    0.00000
 3086  200 ASN  CB    -4.86099  -2.49984  19.30080 5S   153    1.00000
 3087  200 ASN  HB1   -4.69446  -3.01245  20.27229 5S   153    0.00000
 3088  200 ASN  HB2   -4.03090  -2.75791  18.60843 5S   153    0.00000
 3089  200 ASN  CG    -6.16839  -3.01852  18.69227 5S   153    1.00000
 3090  200 ASN  OD1   -6.16368  -3.61566  17.61268 5S   153    1.00000
 3091  200 ASN  ND2   -7.30613  -2.79537  19.40899 5S   153    1.00000
 3092  200 ASN  HD21  -8.18014  -3.11762  19.04796 5S   153    0.00000
 3093  200 ASN  HD22  -7.25794  -2.30786  20.27918 5S   153    0.00000
 3094  200 ASN  C     -3.59637  -0.54293  20.07746 5S   153    1.00000
 3095  200 ASN  O     -3.42328  -0.55101  21.29543 5S   153    1.00000
 3096  201 ASN  N     -2.61652  -0.18619  19.22016 5S   154    1.00000
 3097  201 ASN  HN    -2.75510  -0.16711  18.23032 5S   154    0.00000
 3098  201 ASN  CA    -1.29696   0.16380  19.68395 5S   154    1.00000
 3099  201 ASN  HA    -1.32647   0.46964  20.72031 5S   154    0.00000
 3100  201 ASN  CB    -0.26739  -0.97284  19.47876 5S   154    1.00000
 3101  201 ASN  HB1    0.74625  -0.64069  19.79029 5S   154    0.00000
 3102  201 ASN  HB2   -0.23433  -1.26857  18.40830 5S   154    0.00000
 3103  201 ASN  CG    -0.64968  -2.20931  20.30053 5S   154    1.00000
 3104  201 ASN  OD1   -0.84539  -3.29948  19.75411 5S   154    1.00000
 3105  201 ASN  ND2   -0.74601  -2.02387  21.64870 5S   154    1.00000
 3106  201 ASN  HD21  -0.89884  -2.81202  22.24244 5S   154    0.00000
 3107  201 ASN  HD22  -0.74115  -1.09569  22.01829 5S   154    0.00000
 3108  201 ASN  C     -0.84463   1.34168  18.88940 5S   154    1.00000
 3109  201 ASN  O     -1.07949   1.40879  17.68721 5S   154    1.00000
 3110  202 ALA  N     -0.16867   2.30636  19.55164 5S   155    1.00000
 3111  202 ALA  HN    -0.03452   2.27516  20.53882 5S   155    0.00000
 3112  202 ALA  CA     0.41224   3.43843  18.87821 5S   155    1.00000
 3113  202 ALA  HA    -0.19017   3.68599  18.01622 5S   155    0.00000
 3114  202 ALA  CB     0.49503   4.67847  19.78180 5S   155    1.00000
 3115  202 ALA  HB1    1.10911   4.46768  20.68275 5S   155    0.00000
 3116  202 ALA  HB2   -0.52719   4.96352  20.11073 5S   155    0.00000
 3117  202 ALA  HB3    0.93776   5.53979  19.23706 5S   155    0.00000
 3118  202 ALA  C      1.79375   3.08304  18.40535 5S   155    1.00000
 3119  202 ALA  O      2.39187   2.09823  18.83961 5S   155    1.00000
 3120  203 ALA  N      2.32439   3.89214  17.46388 5S   156    1.00000
 3121  203 ALA  HN     1.81706   4.66758  17.09761 5S   156    0.00000
 3122  203 ALA  CA     3.62816   3.68176  16.89534 5S   156    1.00000
 3123  203 ALA  HA     3.70881   2.64065  16.61276 5S   156    0.00000
 3124  203 ALA  CB     3.85104   4.55516  15.64921 5S   156    1.00000
 3125  203 ALA  HB1    3.74575   5.63043  15.90886 5S   156    0.00000
 3126  203 ALA  HB2    3.09215   4.31015  14.87697 5S   156    0.00000
 3127  203 ALA  HB3    4.85872   4.38410  15.21515 5S   156    0.00000
 3128  203 ALA  C      4.70089   3.99687  17.90515 5S   156    1.00000
 3129  203 ALA  O      4.53708   4.84770  18.77837 5S   156    1.00000
 3130  204 ILE  N      5.82901   3.27133  17.80331 5S   157    1.00000
 3131  204 ILE  HN     5.90651   2.54581  17.11805 5S   157    0.00000
 3132  204 ILE  CA     6.97160   3.42386  18.66331 5S   157    1.00000
 3133  204 ILE  HA     6.67141   3.87888  19.59566 5S   157    0.00000
 3134  204 ILE  CB     7.65307   2.08739  18.93025 5S   157    1.00000
 3135  204 ILE  HB     7.95926   1.62974  17.96012 5S   157    0.00000
 3136  204 ILE  CG2    8.91263   2.27505  19.80330 5S   157    1.00000
 3137  204 ILE  HG21   8.63914   2.74362  20.77215 5S   157    0.00000
 3138  204 ILE  HG22   9.66102   2.91278  19.29169 5S   157    0.00000
 3139  204 ILE  HG23   9.39097   1.29465  20.00684 5S   157    0.00000
 3140  204 ILE  CG1    6.65058   1.12135  19.60038 5S   157    1.00000
 3141  204 ILE  HG11   5.69005   1.12568  19.04139 5S   157    0.00000
 3142  204 ILE  HG12   6.44529   1.47204  20.63574 5S   157    0.00000
 3143  204 ILE  CD     7.15707  -0.31965  19.63739 5S   157    1.00000
 3144  204 ILE  HD1    8.00183  -0.41860  20.35103 5S   157    0.00000
 3145  204 ILE  HD2    7.50444  -0.62616  18.62675 5S   157    0.00000
 3146  204 ILE  HD3    6.33865  -0.99876  19.95647 5S   157    0.00000
 3147  204 ILE  C      7.89797   4.35154  17.94288 5S   157    1.00000
 3148  204 ILE  O      8.14908   4.18822  16.75414 5S   157    1.00000
 3149  205 VAL  N      8.44699   5.36684  18.64564 5S   158    1.00000
 3150  205 VAL  HN     8.23864   5.51165  19.60872 5S   158    0.00000
 3151  205 VAL  CA     9.37173   6.30586  18.05428 5S   158    1.00000
 3152  205 VAL  HA     8.89399   6.73189  17.18337 5S   158    0.00000
 3153  205 VAL  CB     9.75361   7.42987  19.00653 5S   158    1.00000
 3154  205 VAL  HB    10.18704   6.99875  19.93749 5S   158    0.00000
 3155  205 VAL  CG1   10.79370   8.36451  18.35664 5S   158    1.00000
 3156  205 VAL  HG11  10.44999   8.67965  17.34845 5S   158    0.00000
 3157  205 VAL  HG12  11.77494   7.85426  18.26089 5S   158    0.00000
 3158  205 VAL  HG13  10.93163   9.27054  18.98342 5S   158    0.00000
 3159  205 VAL  CG2    8.48613   8.21869  19.38835 5S   158    1.00000
 3160  205 VAL  HG21   7.74277   7.56678  19.89068 5S   158    0.00000
 3161  205 VAL  HG22   8.02361   8.66508  18.48249 5S   158    0.00000
 3162  205 VAL  HG23   8.75714   9.03965  20.08655 5S   158    0.00000
 3163  205 VAL  C     10.60410   5.55224  17.61571 5S   158    1.00000
 3164  205 VAL  O     11.20833   4.81673  18.39289 5S   158    1.00000
 3165  206 LEU  N     10.96721   5.68547  16.32286 5S   159    1.00000
 3166  206 LEU  HN    10.43639   6.25552  15.69392 5S   159    0.00000
 3167  206 LEU  CA    12.07034   4.97904  15.73490 5S   159    1.00000
 3168  206 LEU  HA    11.97690   3.93647  16.00803 5S   159    0.00000
 3169  206 LEU  CB    12.05922   5.11295  14.19744 5S   159    1.00000
 3170  206 LEU  HB1   12.33405   6.14902  13.90361 5S   159    0.00000
 3171  206 LEU  HB2   11.01078   4.94355  13.86383 5S   159    0.00000
 3172  206 LEU  CG    12.95153   4.12392  13.42066 5S   159    1.00000
 3173  206 LEU  HG    12.92772   3.14176  13.93987 5S   159    0.00000
 3174  206 LEU  CD1   12.38184   3.90737  12.01149 5S   159    1.00000
 3175  206 LEU  HD11  12.34103   4.87680  11.47224 5S   159    0.00000
 3176  206 LEU  HD12  11.35404   3.49321  12.07144 5S   159    0.00000
 3177  206 LEU  HD13  13.01930   3.19948  11.44359 5S   159    0.00000
 3178  206 LEU  CD2   14.41043   4.59445  13.33213 5S   159    1.00000
 3179  206 LEU  HD21  14.90286   4.53657  14.32268 5S   159    0.00000
 3180  206 LEU  HD22  14.44114   5.64744  12.97870 5S   159    0.00000
 3181  206 LEU  HD23  14.97818   3.95853  12.62156 5S   159    0.00000
 3182  206 LEU  C     13.34401   5.53973  16.29678 5S   159    1.00000
 3183  206 LEU  O     13.58810   6.74421  16.23598 5S   159    1.00000
 3184  207 GLN  N     14.16041   4.65231  16.89836 5S   160    1.00000
 3185  207 GLN  HN    13.91127   3.68964  16.97033 5S   160    0.00000
 3186  207 GLN  CA    15.42059   5.02436  17.48006 5S   160    1.00000
 3187  207 GLN  HA    15.68556   6.03078  17.18778 5S   160    0.00000
 3188  207 GLN  CB    15.42101   4.90399  19.01958 5S   160    1.00000
 3189  207 GLN  HB1   16.44008   5.14125  19.39855 5S   160    0.00000
 3190  207 GLN  HB2   15.17136   3.85816  19.30785 5S   160    0.00000
 3191  207 GLN  CG    14.40477   5.85219  19.67978 5S   160    1.00000
 3192  207 GLN  HG1   13.37788   5.55475  19.38144 5S   160    0.00000
 3193  207 GLN  HG2   14.58393   6.89233  19.33549 5S   160    0.00000
 3194  207 GLN  CD    14.54143   5.80704  21.20402 5S   160    1.00000
 3195  207 GLN  OE1   15.62314   6.03340  21.75666 5S   160    1.00000
 3196  207 GLN  NE2   13.40086   5.51824  21.89575 5S   160    1.00000
 3197  207 GLN  HE21  13.42681   5.49231  22.89379 5S   160    0.00000
 3198  207 GLN  HE22  12.55158   5.34521  21.39849 5S   160    0.00000
 3199  207 GLN  C     16.45130   4.09344  16.93003 5S   160    1.00000
 3200  207 GLN  O     16.20900   2.89497  16.80925 5S   160    1.00000
 3201  208 LEU  N     17.63398   4.63850  16.57286 5S   161    1.00000
 3202  208 LEU  HN    17.79087   5.62234  16.61113 5S   161    0.00000
 3203  208 LEU  CA    18.74002   3.84951  16.09619 5S   161    1.00000
 3204  208 LEU  HA    18.43450   2.82275  16.04660 5S   161    0.00000
 3205  208 LEU  CB    19.24050   4.33425  14.72590 5S   161    1.00000
 3206  208 LEU  HB1   20.18382   3.81050  14.45713 5S   161    0.00000
 3207  208 LEU  HB2   19.45224   5.42619  14.76396 5S   161    0.00000
 3208  208 LEU  CG    18.22171   4.05028  13.61206 5S   161    1.00000
 3209  208 LEU  HG    17.30580   4.65460  13.80636 5S   161    0.00000
 3210  208 LEU  CD1   18.79708   4.48101  12.26723 5S   161    1.00000
 3211  208 LEU  HD11  19.61361   3.79366  11.97055 5S   161    0.00000
 3212  208 LEU  HD12  19.20886   5.50780  12.35753 5S   161    0.00000
 3213  208 LEU  HD13  18.01575   4.45916  11.48061 5S   161    0.00000
 3214  208 LEU  CD2   17.83508   2.56453  13.58546 5S   161    1.00000
 3215  208 LEU  HD21  17.22816   2.31516  14.47846 5S   161    0.00000
 3216  208 LEU  HD22  18.75446   1.93912  13.59962 5S   161    0.00000
 3217  208 LEU  HD23  17.23742   2.32469  12.68493 5S   161    0.00000
 3218  208 LEU  C     19.86759   3.93213  17.06983 5S   161    1.00000
 3219  208 LEU  O     19.99839   4.96044  17.73395 5S   161    1.00000
 3220  209 PRO  N     20.72239   2.90516  17.19398 5S   162    1.00000
 3221  209 PRO  CD    20.63745   1.62497  16.47889 5S   162    1.00000
 3222  209 PRO  HD1   21.09307   1.76429  15.48221 5S   162    0.00000
 3223  209 PRO  HD2   19.59954   1.24930  16.35854 5S   162    0.00000
 3224  209 PRO  CA    21.80808   2.90812  18.15803 5S   162    1.00000
 3225  209 PRO  HA    21.39213   3.04094  19.14540 5S   162    0.00000
 3226  209 PRO  CB    22.50992   1.54879  17.97155 5S   162    1.00000
 3227  209 PRO  HB1   22.83797   1.12246  18.94138 5S   162    0.00000
 3228  209 PRO  HB2   23.38639   1.63399  17.29122 5S   162    0.00000
 3229  209 PRO  CG    21.46391   0.64822  17.30807 5S   162    1.00000
 3230  209 PRO  HG1   21.92880  -0.14627  16.68915 5S   162    0.00000
 3231  209 PRO  HG2   20.81155   0.18986  18.08256 5S   162    0.00000
 3232  209 PRO  C     22.75395   4.04666  17.89117 5S   162    1.00000
 3233  209 PRO  O     22.86597   4.51556  16.76352 5S   162    1.00000
 3234  210 GLN  N     23.43007   4.54609  18.92915 5S   163    1.00000
 3235  210 GLN  HN    23.27177   4.21691  19.85486 5S   163    0.00000
 3236  210 GLN  CA    24.35835   5.63359  18.77077 5S   163    1.00000
 3237  210 GLN  HA    23.85432   6.44451  18.25966 5S   163    0.00000
 3238  210 GLN  CB    24.86928   6.10896  20.14139 5S   163    1.00000
 3239  210 GLN  HB1   25.75575   6.76728  20.01667 5S   163    0.00000
 3240  210 GLN  HB2   25.18720   5.20911  20.71656 5S   163    0.00000
 3241  210 GLN  CG    23.79968   6.84511  20.96801 5S   163    1.00000
 3242  210 GLN  HG1   24.18661   7.00178  21.99739 5S   163    0.00000
 3243  210 GLN  HG2   22.87247   6.23572  21.02425 5S   163    0.00000
 3244  210 GLN  CD    23.48391   8.21384  20.35273 5S   163    1.00000
 3245  210 GLN  OE1   24.24837   8.76475  19.55324 5S   163    1.00000
 3246  210 GLN  NE2   22.31038   8.77831  20.75981 5S   163    1.00000
 3247  210 GLN  HE21  22.04531   9.67031  20.39667 5S   163    0.00000
 3248  210 GLN  HE22  21.72457   8.29374  21.40784 5S   163    0.00000
 3249  210 GLN  C     25.53219   5.19379  17.93215 5S   163    1.00000
 3250  210 GLN  O     26.13199   4.15057  18.18484 5S   163    1.00000
 3251  211 GLY  N     25.84168   5.97698  16.87432 5S   164    1.00000
 3252  211 GLY  HN    25.35790   6.83391  16.70549 5S   164    0.00000
 3253  211 GLY  CA    26.90245   5.64250  15.95184 5S   164    1.00000
 3254  211 GLY  HA1   27.58120   4.94472  16.41891 5S   164    0.00000
 3255  211 GLY  HA2   27.37932   6.57015  15.67608 5S   164    0.00000
 3256  211 GLY  C     26.40227   5.00272  14.69264 5S   164    1.00000
 3257  211 GLY  O     27.20433   4.61503  13.84477 5S   164    1.00000
 3258  212 THR  N     25.06603   4.88392  14.51099 5S   165    1.00000
 3259  212 THR  HN    24.41202   5.14060  15.21893 5S   165    0.00000
 3260  212 THR  CA    24.49591   4.34923  13.29426 5S   165    1.00000
 3261  212 THR  HA    24.99209   3.41048  13.08461 5S   165    0.00000
 3262  212 THR  CB    23.00720   4.10530  13.40085 5S   165    1.00000
 3263  212 THR  HB    22.45405   5.05838  13.55770 5S   165    0.00000
 3264  212 THR  OG1   22.75710   3.24541  14.49286 5S   165    1.00000
 3265  212 THR  HG1   22.78471   3.80911  15.27809 5S   165    0.00000
 3266  212 THR  CG2   22.47672   3.38813  12.15761 5S   165    1.00000
 3267  212 THR  HG21  23.10935   2.50481  11.95335 5S   165    0.00000
 3268  212 THR  HG22  22.48899   4.05813  11.27574 5S   165    0.00000
 3269  212 THR  HG23  21.43945   3.03491  12.33324 5S   165    0.00000
 3270  212 THR  C     24.74278   5.32007  12.16858 5S   165    1.00000
 3271  212 THR  O     24.44600   6.50711  12.27787 5S   165    1.00000
 3272  213 THR  N     25.32392   4.82772  11.05760 5S   166    1.00000
 3273  213 THR  HN    25.56311   3.85621  10.99216 5S   166    0.00000
 3274  213 THR  CA    25.65595   5.62113   9.90892 5S   166    1.00000
 3275  213 THR  HA    26.05732   6.56049  10.26102 5S   166    0.00000
 3276  213 THR  CB    26.67053   4.95109   9.00521 5S   166    1.00000
 3277  213 THR  HB    26.24251   4.03323   8.54304 5S   166    0.00000
 3278  213 THR  OG1   27.81571   4.58165   9.76399 5S   166    1.00000
 3279  213 THR  HG1   27.48973   4.32864  10.63199 5S   166    0.00000
 3280  213 THR  CG2   27.11463   5.93091   7.90422 5S   166    1.00000
 3281  213 THR  HG21  27.57088   6.83402   8.36465 5S   166    0.00000
 3282  213 THR  HG22  26.25095   6.24794   7.28418 5S   166    0.00000
 3283  213 THR  HG23  27.86558   5.45130   7.24239 5S   166    0.00000
 3284  213 THR  C     24.38849   5.87893   9.14964 5S   166    1.00000
 3285  213 THR  O     23.70484   4.95376   8.71075 5S   166    1.00000
 3286  214 LEU  N     24.04527   7.17580   9.01815 5S   167    1.00000
 3287  214 LEU  HN    24.60497   7.90381   9.40634 5S   167    0.00000
 3288  214 LEU  CA    22.84671   7.59760   8.35299 5S   167    1.00000
 3289  214 LEU  HA    22.28616   6.72936   8.07466 5S   167    0.00000
 3290  214 LEU  CB    21.98804   8.52130   9.23937 5S   167    1.00000
 3291  214 LEU  HB1   21.20585   9.01537   8.62365 5S   167    0.00000
 3292  214 LEU  HB2   22.63020   9.31434   9.67990 5S   167    0.00000
 3293  214 LEU  CG    21.26899   7.76620  10.37023 5S   167    1.00000
 3294  214 LEU  HG    22.01724   7.15341  10.92535 5S   167    0.00000
 3295  214 LEU  CD1   20.62880   8.74474  11.36468 5S   167    1.00000
 3296  214 LEU  HD11  19.87611   9.36889  10.84129 5S   167    0.00000
 3297  214 LEU  HD12  21.40285   9.41022  11.80163 5S   167    0.00000
 3298  214 LEU  HD13  20.12068   8.19218  12.18223 5S   167    0.00000
 3299  214 LEU  CD2   20.20986   6.82565   9.78262 5S   167    1.00000
 3300  214 LEU  HD21  20.67819   6.07698   9.11405 5S   167    0.00000
 3301  214 LEU  HD22  19.45954   7.39973   9.20223 5S   167    0.00000
 3302  214 LEU  HD23  19.69009   6.28789  10.59225 5S   167    0.00000
 3303  214 LEU  C     23.20150   8.34798   7.10813 5S   167    1.00000
 3304  214 LEU  O     24.18824   9.09138   7.12050 5S   167    1.00000
 3305  215 PRO  N     22.39796   8.20292   6.02137 5S   168    1.00000
 3306  215 PRO  CD    21.38911   7.20038   5.78523 5S   168    1.00000
 3307  215 PRO  HD1   20.44409   7.64590   6.15810 5S   168    0.00000
 3308  215 PRO  HD2   21.62953   6.23224   6.26535 5S   168    0.00000
 3309  215 PRO  CA    22.42145   9.06647   4.88188 5S   168    1.00000
 3310  215 PRO  HA    23.49746   9.02546   4.70002 5S   168    0.00000
 3311  215 PRO  CB    21.74684   8.40596   3.71456 5S   168    1.00000
 3312  215 PRO  HB1   22.40074   8.34581   2.81636 5S   168    0.00000
 3313  215 PRO  HB2   20.83491   8.96419   3.42971 5S   168    0.00000
 3314  215 PRO  CG    21.36109   7.05197   4.25707 5S   168    1.00000
 3315  215 PRO  HG1   20.35483   6.82332   3.86703 5S   168    0.00000
 3316  215 PRO  HG2   22.12199   6.31832   3.91458 5S   168    0.00000
 3317  215 PRO  C     21.67890  10.48933   5.10851 5S   168    1.00000
 3318  215 PRO  O     21.40344  10.66784   6.28938 5S   168    1.00000
 3319  216 LYS  N     21.56367  11.51655   4.02014 5S   169    1.00000
 3320  216 LYS  HN    21.92761  11.16663   3.17848 5S   169    0.00000
 3321  216 LYS  CA    21.86058  13.08754   3.83433 5S   169    1.00000
 3322  216 LYS  HA    22.42125  13.65151   4.57715 5S   169    0.00000
 3323  216 LYS  CB    22.88872  13.84269   2.83722 5S   169    1.00000
 3324  216 LYS  HB1   23.62110  14.57731   3.29478 5S   169    0.00000
 3325  216 LYS  HB2   22.30856  14.46090   2.12622 5S   169    0.00000
 3326  216 LYS  CG    23.90847  13.00744   2.09930 5S   169    0.00000
 3327  216 LYS  HG1   24.93140  13.41310   1.95370 5S   169    0.00000
 3328  216 LYS  HG2   23.40477  12.97384   1.10340 5S   169    0.00000
 3329  216 LYS  CD    24.15382  11.61534   2.59898 5S   169    0.00000
 3330  216 LYS  HD1   25.06476  11.12215   2.20338 5S   169    0.00000
 3331  216 LYS  HD2   23.30073  11.11973   2.03851 5S   169    0.00000
 3332  216 LYS  CE    24.30887  11.27679   4.11573 5S   169    0.00000
 3333  216 LYS  HE1   24.84898  10.41624   4.45927 5S   169    0.00000
 3334  216 LYS  HE2   23.51953  10.61692   3.71903 5S   169    0.00000
 3335  216 LYS  NZ    23.75422  12.08840   5.36947 5S   169    0.00000
 3336  216 LYS  HZ1   22.80282  12.21133   4.94616 5S   169    0.00000
 3337  216 LYS  HZ2   23.87603  13.08697   5.18124 5S   169    0.00000
 3338  216 LYS  HZ3   22.90347  11.82420   5.96793 5S   169    0.00000
 3339  216 LYS  C     20.56598  13.47435   4.00653 5S   169    1.00000
 3340  216 LYS  O     19.76138  13.07743   3.18020 5S   169    1.00000
 3341  217 GLY  N     20.29050  14.03818   5.19277 5S   170    1.00000
 3342  217 GLY  HN    20.95999  14.29478   5.89551 5S   170    0.00000
 3343  217 GLY  CA    18.92061  14.24021   5.48681 5S   170    1.00000
 3344  217 GLY  HA1   18.38859  14.30588   4.54799 5S   170    0.00000
 3345  217 GLY  HA2   18.88770  15.15767   6.03748 5S   170    0.00000
 3346  217 GLY  C     18.24108  13.15438   6.28172 5S   170    1.00000
 3347  217 GLY  O     17.01839  13.09499   6.21955 5S   170    1.00000
 3348  218 PHE  N     18.94493  12.28574   7.05436 5S   171    1.00000
 3349  218 PHE  HN    19.94210  12.27560   7.09811 5S   171    0.00000
 3350  218 PHE  CA    18.27561  11.30118   7.89569 5S   171    1.00000
 3351  218 PHE  HA    17.20634  11.46588   7.90084 5S   171    0.00000
 3352  218 PHE  CB    18.56466   9.83931   7.49775 5S   171    1.00000
 3353  218 PHE  HB1   18.22482   9.12681   8.27659 5S   171    0.00000
 3354  218 PHE  HB2   19.65078   9.69328   7.35867 5S   171    0.00000
 3355  218 PHE  CG    17.86094   9.48083   6.22368 5S   171    1.00000
 3356  218 PHE  CD1   16.53131   9.05866   6.23228 5S   171    1.00000
 3357  218 PHE  HD1   16.00154   9.01277   7.16923 5S   171    0.00000
 3358  218 PHE  CE1   15.90391   8.68503   5.03726 5S   171    1.00000
 3359  218 PHE  HE1   14.88086   8.36370   5.05997 5S   171    0.00000
 3360  218 PHE  CZ    16.60484   8.72601   3.82187 5S   171    1.00000
 3361  218 PHE  HZ    16.13271   8.43703   2.89735 5S   171    0.00000
 3362  218 PHE  CD2   18.51478   9.52932   4.99469 5S   171    1.00000
 3363  218 PHE  HD2   19.49684   9.86239   4.95792 5S   171    0.00000
 3364  218 PHE  CE2   17.92580   9.15435   3.79805 5S   171    1.00000
 3365  218 PHE  HE2   18.49574   9.19827   2.88097 5S   171    0.00000
 3366  218 PHE  C     18.76007  11.47491   9.30677 5S   171    1.00000
 3367  218 PHE  O     19.95921  11.60388   9.54854 5S   171    1.00000
 3368  219 TYR  N     17.81477  11.50676  10.27735 5S   172    1.00000
 3369  219 TYR  HN    16.84590  11.37046  10.08416 5S   172    0.00000
 3370  219 TYR  CA    18.12711  11.85753  11.64153 5S   172    1.00000
 3371  219 TYR  HA    19.17345  11.66531  11.83934 5S   172    0.00000
 3372  219 TYR  CB    17.79150  13.34022  11.98742 5S   172    1.00000
 3373  219 TYR  HB1   18.14774  13.58025  13.01298 5S   172    0.00000
 3374  219 TYR  HB2   16.69499  13.50785  11.94108 5S   172    0.00000
 3375  219 TYR  CG    18.43916  14.31419  11.02361 5S   172    1.00000
 3376  219 TYR  CD1   17.86722  14.57009   9.76132 5S   172    1.00000
 3377  219 TYR  HD1   16.96465  14.05489   9.46637 5S   172    0.00000
 3378  219 TYR  CE1   18.45927  15.47384   8.87220 5S   172    1.00000
 3379  219 TYR  HE1   17.99813  15.65873   7.91414 5S   172    0.00000
 3380  219 TYR  CZ    19.63224  16.14309   9.23549 5S   172    1.00000
 3381  219 TYR  OH    20.21620  17.09207   8.37077 5S   172    1.00000
 3382  219 TYR  HH    19.51174  17.62357   7.99151 5S   172    0.00000
 3383  219 TYR  CD2   19.61296  15.00338  11.37701 5S   172    1.00000
 3384  219 TYR  HD2   20.06032  14.83974  12.34583 5S   172    0.00000
 3385  219 TYR  CE2   20.20984  15.90651  10.48759 5S   172    1.00000
 3386  219 TYR  HE2   21.10289  16.44083  10.77778 5S   172    0.00000
 3387  219 TYR  C     17.32485  10.94250  12.53069 5S   172    1.00000
 3388  219 TYR  O     16.24115  10.48382  12.17098 5S   172    1.00000
 3389  220 ALA  N     17.87121  10.65029  13.72327 5S   173    1.00000
 3390  220 ALA  HN    18.74831  11.02007  14.01714 5S   173    0.00000
 3391  220 ALA  CA    17.23219   9.87840  14.74461 5S   173    1.00000
 3392  220 ALA  HA    16.16965  10.09676  14.76587 5S   173    0.00000
 3393  220 ALA  CB    17.46572   8.36679  14.53771 5S   173    1.00000
 3394  220 ALA  HB1   18.54975   8.14198  14.60599 5S   173    0.00000
 3395  220 ALA  HB2   17.11554   8.07601  13.52232 5S   173    0.00000
 3396  220 ALA  HB3   16.91182   7.76021  15.28394 5S   173    0.00000
 3397  220 ALA  C     17.94917  10.45004  15.98896 5S   173    1.00000
 3398  220 ALA  OT1   18.66308   9.71191  16.71011 5S   173    1.00000
 3399  220 ALA  OT2   17.87381  11.69538  16.16820 5S   173    0.00000
 3400  221 ALA  N     -4.13272  21.14086  16.17429 6S   50     1.00000
 3401  221 ALA  HT1   -3.72455  21.43612  15.26443 6S   50     0.00000
 3402  221 ALA  HT2   -5.16204  21.28831  16.16307 6S   50     0.00000
 3403  221 ALA  HT3   -3.92764  20.13317  16.33798 6S   50     0.00000
 3404  221 ALA  CA    -3.52933  21.94718  17.26327 6S   50     1.00000
 3405  221 ALA  HA    -3.91498  22.95275  17.17493 6S   50     0.00000
 3406  221 ALA  CB    -3.91240  21.35216  18.62247 6S   50     1.00000
 3407  221 ALA  HB1   -3.54930  20.30306  18.70735 6S   50     0.00000
 3408  221 ALA  HB2   -5.01855  21.35367  18.73407 6S   50     0.00000
 3409  221 ALA  HB3   -3.48661  21.93724  19.46433 6S   50     0.00000
 3410  221 ALA  C     -2.03827  21.99524  17.16902 6S   50     1.00000
 3411  221 ALA  O     -1.41552  21.30341  16.36742 6S   50     1.00000
 3412  222 SER  N     -1.42159  22.86557  17.99208 6S   51     1.00000
 3413  222 SER  HN    -1.94240  23.44978  18.61066 6S   51     0.00000
 3414  222 SER  CA     0.00622  23.05676  18.01167 6S   51     1.00000
 3415  222 SER  HA     0.37409  23.07967  16.99455 6S   51     0.00000
 3416  222 SER  CB     0.35075  24.38976  18.72145 6S   51     1.00000
 3417  222 SER  HB1   -0.18016  24.43649  19.69431 6S   51     0.00000
 3418  222 SER  HB2    0.00559  25.23156  18.08534 6S   51     0.00000
 3419  222 SER  OG     1.73621  24.56893  18.97554 6S   51     1.00000
 3420  222 SER  HG1    2.11203  24.94539  18.16900 6S   51     0.00000
 3421  222 SER  C      0.64427  21.90229  18.73113 6S   51     1.00000
 3422  222 SER  O      0.03845  21.28556  19.60122 6S   51     1.00000
 3423  223 TRP  N      1.91025  21.59771  18.38153 6S   52     1.00000
 3424  223 TRP  HN     2.36862  22.06909  17.63048 6S   52     0.00000
 3425  223 TRP  CA     2.69157  20.60993  19.08396 6S   52     1.00000
 3426  223 TRP  HA     2.05780  19.76906  19.32034 6S   52     0.00000
 3427  223 TRP  CB     3.89423  20.13137  18.24597 6S   52     1.00000
 3428  223 TRP  HB1    4.65640  19.64296  18.88887 6S   52     0.00000
 3429  223 TRP  HB2    4.36221  21.00970  17.74686 6S   52     0.00000
 3430  223 TRP  CG     3.49555  19.13491  17.18812 6S   52     1.00000
 3431  223 TRP  CD1    3.22012  19.38386  15.88031 6S   52     1.00000
 3432  223 TRP  HD1    3.26567  20.35642  15.41538 6S   52     0.00000
 3433  223 TRP  NE1    2.88406  18.22048  15.24169 6S   52     1.00000
 3434  223 TRP  HE1    2.65166  18.14010  14.29458 6S   52     0.00000
 3435  223 TRP  CE2    2.91884  17.18767  16.13198 6S   52     1.00000
 3436  223 TRP  CD2    3.30747  17.71678  17.37849 6S   52     1.00000
 3437  223 TRP  CE3    3.43996  16.89175  18.49177 6S   52     1.00000
 3438  223 TRP  HE3    3.71160  17.27386  19.46340 6S   52     0.00000
 3439  223 TRP  CZ3    3.15479  15.52491  18.33185 6S   52     1.00000
 3440  223 TRP  HZ3    3.22723  14.86147  19.18027 6S   52     0.00000
 3441  223 TRP  CZ2    2.65028  15.83664  15.96881 6S   52     1.00000
 3442  223 TRP  HZ2    2.35089  15.42876  15.01466 6S   52     0.00000
 3443  223 TRP  CH2    2.76798  15.00555  17.08709 6S   52     1.00000
 3444  223 TRP  HH2    2.56086  13.95067  16.98203 6S   52     0.00000
 3445  223 TRP  C      3.20840  21.13665  20.39113 6S   52     1.00000
 3446  223 TRP  O      3.51948  20.35009  21.28147 6S   52     1.00000
 3447  224 PHE  N      3.31013  22.47240  20.53994 6S   53     1.00000
 3448  224 PHE  HN     2.98303  23.10983  19.84407 6S   53     0.00000
 3449  224 PHE  CA     3.93729  23.07041  21.68492 6S   53     1.00000
 3450  224 PHE  HA     4.32191  22.29831  22.32681 6S   53     0.00000
 3451  224 PHE  CB     5.09324  24.02607  21.30615 6S   53     1.00000
 3452  224 PHE  HB1    5.62680  24.37886  22.21324 6S   53     0.00000
 3453  224 PHE  HB2    4.70743  24.90209  20.74304 6S   53     0.00000
 3454  224 PHE  CG     6.09057  23.32343  20.43198 6S   53     1.00000
 3455  224 PHE  CD1    5.95738  23.37947  19.03725 6S   53     1.00000
 3456  224 PHE  HD1    5.11907  23.91062  18.61398 6S   53     0.00000
 3457  224 PHE  CE1    6.88804  22.75312  18.20438 6S   53     1.00000
 3458  224 PHE  HE1    6.78871  22.82096  17.13299 6S   53     0.00000
 3459  224 PHE  CZ     7.95206  22.04745  18.76910 6S   53     1.00000
 3460  224 PHE  HZ     8.67353  21.56774  18.13930 6S   53     0.00000
 3461  224 PHE  CD2    7.16349  22.60686  20.98540 6S   53     1.00000
 3462  224 PHE  HD2    7.27508  22.55009  22.05672 6S   53     0.00000
 3463  224 PHE  CE2    8.09130  21.96678  20.15691 6S   53     1.00000
 3464  224 PHE  HE2    8.92166  21.42475  20.58269 6S   53     0.00000
 3465  224 PHE  C      2.90149  23.83034  22.45702 6S   53     1.00000
 3466  224 PHE  O      1.87052  24.24170  21.92781 6S   53     1.00000
 3467  225 THR  N      3.16796  24.05189  23.75999 6S   54     1.00000
 3468  225 THR  HN     3.96401  23.64052  24.20354 6S   54     0.00000
 3469  225 THR  CA     2.35418  24.87847  24.61815 6S   54     1.00000
 3470  225 THR  HA     1.32022  24.59440  24.47897 6S   54     0.00000
 3471  225 THR  CB     2.72944  24.73869  26.08409 6S   54     1.00000
 3472  225 THR  HB     2.13230  25.43816  26.71182 6S   54     0.00000
 3473  225 THR  OG1    4.11441  25.00387  26.27207 6S   54     1.00000
 3474  225 THR  HG1    4.21457  25.35751  27.16181 6S   54     0.00000
 3475  225 THR  CG2    2.44897  23.29394  26.53779 6S   54     1.00000
 3476  225 THR  HG21   3.04586  22.56909  25.94532 6S   54     0.00000
 3477  225 THR  HG22   1.37364  23.04948  26.41399 6S   54     0.00000
 3478  225 THR  HG23   2.72155  23.17030  27.60731 6S   54     0.00000
 3479  225 THR  C      2.50737  26.31691  24.19491 6S   54     1.00000
 3480  225 THR  O      3.50618  26.70214  23.59039 6S   54     1.00000
 3481  226 ALA  N      1.49369  27.15256  24.47711 6S   55     1.00000
 3482  226 ALA  HN     0.69351  26.87214  24.99967 6S   55     0.00000
 3483  226 ALA  CA     1.49016  28.49278  23.96493 6S   55     1.00000
 3484  226 ALA  HA     1.84523  28.47547  22.94252 6S   55     0.00000
 3485  226 ALA  CB     0.08165  29.09545  23.96918 6S   55     1.00000
 3486  226 ALA  HB1   -0.28308  29.26775  25.00383 6S   55     0.00000
 3487  226 ALA  HB2   -0.61938  28.39683  23.47621 6S   55     0.00000
 3488  226 ALA  HB3    0.06212  30.05219  23.40622 6S   55     0.00000
 3489  226 ALA  C      2.39182  29.37374  24.78078 6S   55     1.00000
 3490  226 ALA  O      2.59228  29.16106  25.97588 6S   55     1.00000
 3491  227 LEU  N      2.95245  30.40536  24.12504 6S   56     1.00000
 3492  227 LEU  HN     2.87677  30.49098  23.13124 6S   56     0.00000
 3493  227 LEU  CA     3.61205  31.48793  24.79495 6S   56     1.00000
 3494  227 LEU  HA     4.01794  31.15196  25.73761 6S   56     0.00000
 3495  227 LEU  CB     4.71566  32.10503  23.91411 6S   56     1.00000
 3496  227 LEU  HB1    4.90478  33.14735  24.22433 6S   56     0.00000
 3497  227 LEU  HB2    4.36293  32.12661  22.86001 6S   56     0.00000
 3498  227 LEU  CG     6.07790  31.39063  23.96905 6S   56     1.00000
 3499  227 LEU  HG     5.92280  30.30666  23.77250 6S   56     0.00000
 3500  227 LEU  CD1    6.99529  31.95782  22.87462 6S   56     1.00000
 3501  227 LEU  HD11   7.14994  33.04567  23.04039 6S   56     0.00000
 3502  227 LEU  HD12   6.53126  31.81572  21.87684 6S   56     0.00000
 3503  227 LEU  HD13   7.98206  31.45069  22.88972 6S   56     0.00000
 3504  227 LEU  CD2    6.74214  31.54053  25.34684 6S   56     1.00000
 3505  227 LEU  HD21   6.10907  31.09388  26.14057 6S   56     0.00000
 3506  227 LEU  HD22   6.89684  32.61662  25.57581 6S   56     0.00000
 3507  227 LEU  HD23   7.72809  31.03046  25.35538 6S   56     0.00000
 3508  227 LEU  C      2.57123  32.53822  25.07449 6S   56     1.00000
 3509  227 LEU  O      2.11901  33.24024  24.17604 6S   56     1.00000
 3510  228 THR  N      2.16403  32.66892  26.35429 6S   57     1.00000
 3511  228 THR  HN     2.51731  32.07260  27.06988 6S   57     0.00000
 3512  228 THR  CA     1.18926  33.64897  26.77731 6S   57     1.00000
 3513  228 THR  HA     0.41629  33.70351  26.02577 6S   57     0.00000
 3514  228 THR  CB     0.55282  33.27425  28.10449 6S   57     1.00000
 3515  228 THR  HB     1.31761  33.28524  28.91130 6S   57     0.00000
 3516  228 THR  OG1    0.01344  31.95855  28.03401 6S   57     1.00000
 3517  228 THR  HG1    0.70894  31.39708  27.68202 6S   57     0.00000
 3518  228 THR  CG2   -0.58646  34.24850  28.46072 6S   57     1.00000
 3519  228 THR  HG21  -1.28837  34.35468  27.60556 6S   57     0.00000
 3520  228 THR  HG22  -0.17519  35.24951  28.70760 6S   57     0.00000
 3521  228 THR  HG23  -1.15351  33.87678  29.33924 6S   57     0.00000
 3522  228 THR  C      1.86683  34.99892  26.88390 6S   57     1.00000
 3523  228 THR  O      2.98717  35.10715  27.37372 6S   57     1.00000
 3524  229 GLN  N      1.19332  36.05800  26.39397 6S   58     1.00000
 3525  229 GLN  HN     0.28313  35.93429  25.99234 6S   58     0.00000
 3526  229 GLN  CA     1.67733  37.40722  26.34502 6S   58     1.00000
 3527  229 GLN  HA     2.75624  37.40018  26.37087 6S   58     0.00000
 3528  229 GLN  CB     1.19065  38.12002  25.06343 6S   58     1.00000
 3529  229 GLN  HB1    0.08434  38.05604  25.00299 6S   58     0.00000
 3530  229 GLN  HB2    1.58964  37.56648  24.18702 6S   58     0.00000
 3531  229 GLN  CG     1.62486  39.58951  24.97198 6S   58     1.00000
 3532  229 GLN  HG1    2.73167  39.65211  24.92337 6S   58     0.00000
 3533  229 GLN  HG2    1.28062  40.13716  25.87199 6S   58     0.00000
 3534  229 GLN  CD     1.00916  40.24468  23.73342 6S   58     1.00000
 3535  229 GLN  OE1    0.50571  39.57442  22.82655 6S   58     1.00000
 3536  229 GLN  NE2    1.06285  41.60611  23.71161 6S   58     1.00000
 3537  229 GLN  HE21   0.78023  42.10281  22.89213 6S   58     0.00000
 3538  229 GLN  HE22   1.57430  42.07874  24.43192 6S   58     0.00000
 3539  229 GLN  C      1.15289  38.15533  27.53639 6S   58     1.00000
 3540  229 GLN  O     -0.02619  38.48425  27.60723 6S   58     1.00000
 3541  230 HSD  N      2.03349  38.46789  28.50545 6S   59     1.00000
 3542  230 HSD  HN     2.99327  38.19658  28.43497 6S   59     0.00000
 3543  230 HSD  CA     1.63734  39.11846  29.73404 6S   59     1.00000
 3544  230 HSD  HA     0.59825  38.89859  29.93526 6S   59     0.00000
 3545  230 HSD  CB     2.46644  38.63959  30.94238 6S   59     1.00000
 3546  230 HSD  HB1    2.21995  39.23082  31.84959 6S   59     0.00000
 3547  230 HSD  HB2    3.54323  38.76814  30.73503 6S   59     0.00000
 3548  230 HSD  ND1    2.94398  36.16758  30.66526 6S   59     1.00000
 3549  230 HSD  HD1    3.65985  36.27322  29.96892 6S   59     0.00000
 3550  230 HSD  CG     2.24850  37.19804  31.25939 6S   59     1.00000
 3551  230 HSD  CE1    2.47958  35.01929  31.19534 6S   59     1.00000
 3552  230 HSD  HE1    2.86799  34.03940  30.92016 6S   59     0.00000
 3553  230 HSD  NE2    1.53152  35.24129  32.07843 6S   59     1.00000
 3554  230 HSD  CD2    1.38453  36.61325  32.12493 6S   59     1.00000
 3555  230 HSD  HD2    0.65549  37.05779  32.79283 6S   59     0.00000
 3556  230 HSD  C      1.76583  40.61636  29.66471 6S   59     1.00000
 3557  230 HSD  O      1.34457  41.29385  30.59992 6S   59     1.00000
 3558  231 GLY  N      2.33455  41.18274  28.57494 6S   60     1.00000
 3559  231 GLY  HN     2.67152  40.63420  27.81241 6S   60     0.00000
 3560  231 GLY  CA     2.49401  42.61927  28.46997 6S   60     1.00000
 3561  231 GLY  HA1    3.55035  42.81735  28.37291 6S   60     0.00000
 3562  231 GLY  HA2    2.04972  43.11206  29.32306 6S   60     0.00000
 3563  231 GLY  C      1.79536  43.13801  27.25435 6S   60     1.00000
 3564  231 GLY  O      1.03331  42.43498  26.59862 6S   60     1.00000
 3565  232 LYS  N      2.04181  44.42338  26.92329 6S   61     1.00000
 3566  232 LYS  HN     2.60558  45.00889  27.50149 6S   61     0.00000
 3567  232 LYS  CA     1.46786  45.06030  25.75870 6S   61     1.00000
 3568  232 LYS  HA     0.45659  44.70408  25.62300 6S   61     0.00000
 3569  232 LYS  CB     1.44982  46.59277  25.91161 6S   61     1.00000
 3570  232 LYS  HB1    1.10222  47.06359  24.96417 6S   61     0.00000
 3571  232 LYS  HB2    2.48068  46.95481  26.12377 6S   61     0.00000
 3572  232 LYS  CG     0.52549  47.07216  27.03712 6S   61     1.00000
 3573  232 LYS  HG1    0.81940  46.59177  27.99668 6S   61     0.00000
 3574  232 LYS  HG2   -0.51862  46.76743  26.80419 6S   61     0.00000
 3575  232 LYS  CD     0.58904  48.59426  27.20624 6S   61     1.00000
 3576  232 LYS  HD1    0.26947  49.08217  26.25899 6S   61     0.00000
 3577  232 LYS  HD2    1.65094  48.87863  27.38851 6S   61     0.00000
 3578  232 LYS  CE    -0.25790  49.10671  28.37478 6S   61     1.00000
 3579  232 LYS  HE1   -0.11428  50.20043  28.49874 6S   61     0.00000
 3580  232 LYS  HE2    0.03302  48.58446  29.31106 6S   61     0.00000
 3581  232 LYS  NZ    -1.70153  48.86019  28.14543 6S   61     1.00000
 3582  232 LYS  HZ1   -1.86920  47.83919  28.03906 6S   61     0.00000
 3583  232 LYS  HZ2   -2.00640  49.35076  27.28059 6S   61     0.00000
 3584  232 LYS  HZ3   -2.24532  49.21712  28.95666 6S   61     0.00000
 3585  232 LYS  C      2.23291  44.72654  24.50408 6S   61     1.00000
 3586  232 LYS  O      1.70300  44.84866  23.40179 6S   61     1.00000
 3587  233 GLU  N      3.49890  44.28121  24.63779 6S   62     1.00000
 3588  233 GLU  HN     3.92522  44.17815  25.53291 6S   62     0.00000
 3589  233 GLU  CA     4.35069  43.98209  23.51525 6S   62     1.00000
 3590  233 GLU  HA     4.25116  44.77120  22.78312 6S   62     0.00000
 3591  233 GLU  CB     5.82645  43.84439  23.94181 6S   62     1.00000
 3592  233 GLU  HB1    6.47172  43.84917  23.03498 6S   62     0.00000
 3593  233 GLU  HB2    5.97563  42.87304  24.46919 6S   62     0.00000
 3594  233 GLU  CG     6.26452  44.97426  24.88967 6S   62     1.00000
 3595  233 GLU  HG1    5.58327  45.02371  25.76672 6S   62     0.00000
 3596  233 GLU  HG2    6.22613  45.94551  24.35438 6S   62     0.00000
 3597  233 GLU  CD     7.67662  44.74797  25.42232 6S   62     1.00000
 3598  233 GLU  OE1    8.36727  43.80114  24.96141 6S   62     1.00000
 3599  233 GLU  OE2    8.07502  45.52846  26.32811 6S   62     1.00000
 3600  233 GLU  C      3.95494  42.67603  22.90300 6S   62     1.00000
 3601  233 GLU  O      3.87496  41.66609  23.59783 6S   62     1.00000
 3602  234 ASP  N      3.71704  42.65935  21.57369 6S   63     1.00000
 3603  234 ASP  HN     3.74725  43.48775  21.02004 6S   63     0.00000
 3604  234 ASP  CA     3.43586  41.43767  20.86168 6S   63     1.00000
 3605  234 ASP  HA     2.72965  40.85348  21.43669 6S   63     0.00000
 3606  234 ASP  CB     2.87333  41.70074  19.44252 6S   63     1.00000
 3607  234 ASP  HB1    2.92673  40.78255  18.82034 6S   63     0.00000
 3608  234 ASP  HB2    3.47730  42.49558  18.95420 6S   63     0.00000
 3609  234 ASP  CG     1.40892  42.14360  19.49147 6S   63     1.00000
 3610  234 ASP  OD1    0.63569  41.59302  20.31914 6S   63     1.00000
 3611  234 ASP  OD2    1.03746  43.02059  18.66799 6S   63     1.00000
 3612  234 ASP  C      4.70362  40.62606  20.74468 6S   63     1.00000
 3613  234 ASP  O      5.81017  41.10707  20.99207 6S   63     1.00000
 3614  235 LEU  N      4.55355  39.33658  20.38205 6S   64     1.00000
 3615  235 LEU  HN     3.65499  38.95254  20.18331 6S   64     0.00000
 3616  235 LEU  CA     5.65820  38.41823  20.31006 6S   64     1.00000
 3617  235 LEU  HA     6.26433  38.55857  21.19392 6S   64     0.00000
 3618  235 LEU  CB     5.14045  36.96587  20.24701 6S   64     1.00000
 3619  235 LEU  HB1    4.52174  36.83525  19.33285 6S   64     0.00000
 3620  235 LEU  HB2    4.46916  36.80804  21.11941 6S   64     0.00000
 3621  235 LEU  CG     6.21517  35.86421  20.29171 6S   64     1.00000
 3622  235 LEU  HG     6.85919  35.95561  19.38777 6S   64     0.00000
 3623  235 LEU  CD1    7.11448  35.99936  21.52811 6S   64     1.00000
 3624  235 LEU  HD11   6.48763  36.09347  22.43572 6S   64     0.00000
 3625  235 LEU  HD12   7.75996  36.89757  21.44562 6S   64     0.00000
 3626  235 LEU  HD13   7.76003  35.10583  21.63689 6S   64     0.00000
 3627  235 LEU  CD2    5.55385  34.47958  20.24472 6S   64     1.00000
 3628  235 LEU  HD21   4.95029  34.37682  19.31819 6S   64     0.00000
 3629  235 LEU  HD22   4.89065  34.34612  21.12492 6S   64     0.00000
 3630  235 LEU  HD23   6.32634  33.68324  20.25797 6S   64     0.00000
 3631  235 LEU  C      6.49488  38.71487  19.09621 6S   64     1.00000
 3632  235 LEU  O      5.96284  39.01272  18.02852 6S   64     1.00000
 3633  236 LYS  N      7.83604  38.66765  19.25229 6S   65     1.00000
 3634  236 LYS  HN     8.25985  38.50495  20.14033 6S   65     0.00000
 3635  236 LYS  CA     8.73191  38.86430  18.14545 6S   65     1.00000
 3636  236 LYS  HA     8.38051  38.27263  17.31263 6S   65     0.00000
 3637  236 LYS  CB     8.84340  40.34171  17.72065 6S   65     1.00000
 3638  236 LYS  HB1    7.84347  40.67853  17.36417 6S   65     0.00000
 3639  236 LYS  HB2    9.55325  40.44055  16.87136 6S   65     0.00000
 3640  236 LYS  CG     9.27410  41.27456  18.85542 6S   65     1.00000
 3641  236 LYS  HG1   10.27274  40.96230  19.23397 6S   65     0.00000
 3642  236 LYS  HG2    8.54938  41.20313  19.69757 6S   65     0.00000
 3643  236 LYS  CD     9.35848  42.72729  18.39149 6S   65     1.00000
 3644  236 LYS  HD1    8.35994  43.04034  18.01156 6S   65     0.00000
 3645  236 LYS  HD2   10.08617  42.78441  17.55052 6S   65     0.00000
 3646  236 LYS  CE     9.79642  43.64691  19.52875 6S   65     1.00000
 3647  236 LYS  HE1   10.76629  43.30139  19.94650 6S   65     0.00000
 3648  236 LYS  HE2    9.02850  43.65506  20.33139 6S   65     0.00000
 3649  236 LYS  NZ     9.97370  45.02986  19.04053 6S   65     1.00000
 3650  236 LYS  HZ1    9.07425  45.37764  18.65115 6S   65     0.00000
 3651  236 LYS  HZ2   10.70058  45.04199  18.29637 6S   65     0.00000
 3652  236 LYS  HZ3   10.27217  45.63796  19.82927 6S   65     0.00000
 3653  236 LYS  C     10.09110  38.35404  18.52714 6S   65     1.00000
 3654  236 LYS  O     10.47234  38.36455  19.69773 6S   65     1.00000
 3655  237 PHE  N     10.85031  37.87413  17.51706 6S   66     1.00000
 3656  237 PHE  HN    10.52015  37.86608  16.57636 6S   66     0.00000
 3657  237 PHE  CA    12.15784  37.30221  17.72637 6S   66     1.00000
 3658  237 PHE  HA    12.50805  37.57329  18.70803 6S   66     0.00000
 3659  237 PHE  CB    12.17478  35.76657  17.55052 6S   66     1.00000
 3660  237 PHE  HB1   13.21060  35.37559  17.62959 6S   66     0.00000
 3661  237 PHE  HB2   11.76130  35.48300  16.55923 6S   66     0.00000
 3662  237 PHE  CG    11.35585  35.09208  18.60855 6S   66     1.00000
 3663  237 PHE  CD1   11.94867  34.69047  19.81686 6S   66     1.00000
 3664  237 PHE  HD1   12.99740  34.88122  19.99137 6S   66     0.00000
 3665  237 PHE  CE1   11.19762  34.00833  20.78039 6S   66     1.00000
 3666  237 PHE  HE1   11.66734  33.68661  21.69585 6S   66     0.00000
 3667  237 PHE  CZ     9.84648  33.72647  20.54765 6S   66     1.00000
 3668  237 PHE  HZ     9.26465  33.20734  21.29444 6S   66     0.00000
 3669  237 PHE  CD2    9.99915  34.80509  18.38390 6S   66     1.00000
 3670  237 PHE  HD2    9.53456  35.10064  17.45475 6S   66     0.00000
 3671  237 PHE  CE2    9.24917  34.12394  19.34599 6S   66     1.00000
 3672  237 PHE  HE2    8.21020  33.90683  19.15671 6S   66     0.00000
 3673  237 PHE  C     13.09297  37.86137  16.68549 6S   66     1.00000
 3674  237 PHE  O     12.64630  38.17434  15.58034 6S   66     1.00000
 3675  238 PRO  N     14.39882  37.97641  16.95061 6S   67     1.00000
 3676  238 PRO  CD    15.00358  37.92617  18.28277 6S   67     1.00000
 3677  238 PRO  HD1   15.23547  36.86932  18.53430 6S   67     0.00000
 3678  238 PRO  HD2   14.34696  38.37168  19.06043 6S   67     0.00000
 3679  238 PRO  CA    15.37652  38.29525  15.92524 6S   67     1.00000
 3680  238 PRO  HA    15.04874  39.16227  15.37059 6S   67     0.00000
 3681  238 PRO  CB    16.69756  38.51599  16.68515 6S   67     1.00000
 3682  238 PRO  HB1   17.24699  39.39503  16.29021 6S   67     0.00000
 3683  238 PRO  HB2   17.35757  37.62195  16.63325 6S   67     0.00000
 3684  238 PRO  CG    16.28470  38.74197  18.14339 6S   67     1.00000
 3685  238 PRO  HG1   17.06858  38.41852  18.85534 6S   67     0.00000
 3686  238 PRO  HG2   16.05529  39.81736  18.30471 6S   67     0.00000
 3687  238 PRO  C     15.50359  37.13500  14.98377 6S   67     1.00000
 3688  238 PRO  O     15.09639  36.02433  15.32572 6S   67     1.00000
 3689  239 ARG  N     16.07167  37.37255  13.78757 6S   68     1.00000
 3690  239 ARG  HN    16.39221  38.27917  13.52533 6S   68     0.00000
 3691  239 ARG  CA    16.19670  36.34008  12.79845 6S   68     1.00000
 3692  239 ARG  HA    15.21442  35.91236  12.64311 6S   68     0.00000
 3693  239 ARG  CB    16.68523  36.88769  11.44957 6S   68     1.00000
 3694  239 ARG  HB1   15.90883  37.57246  11.03668 6S   68     0.00000
 3695  239 ARG  HB2   16.78306  36.03094  10.75079 6S   68     0.00000
 3696  239 ARG  CG    18.01416  37.66594  11.48563 6S   68     1.00000
 3697  239 ARG  HG1   18.70248  37.20713  12.22657 6S   68     0.00000
 3698  239 ARG  HG2   17.82406  38.70951  11.81624 6S   68     0.00000
 3699  239 ARG  CD    18.75928  37.65723  10.14377 6S   68     1.00000
 3700  239 ARG  HD1   19.12474  36.63055   9.92483 6S   68     0.00000
 3701  239 ARG  HD2   19.62978  38.34413  10.17818 6S   68     0.00000
 3702  239 ARG  NE    17.84440  38.12532   9.04951 6S   68     1.00000
 3703  239 ARG  HE    17.69281  39.10671   8.94353 6S   68     0.00000
 3704  239 ARG  CZ    17.22953  37.27488   8.17673 6S   68     1.00000
 3705  239 ARG  NH1   16.42728  37.78391   7.20834 6S   68     1.00000
 3706  239 ARG  HH11  16.30636  38.77188   7.13831 6S   68     0.00000
 3707  239 ARG  HH12  15.96923  37.16474   6.57424 6S   68     0.00000
 3708  239 ARG  NH2   17.39347  35.92897   8.26700 6S   68     1.00000
 3709  239 ARG  HH21  17.96075  35.55862   9.00116 6S   68     0.00000
 3710  239 ARG  HH22  16.91534  35.31811   7.64052 6S   68     0.00000
 3711  239 ARG  C     17.11822  35.24516  13.28583 6S   68     1.00000
 3712  239 ARG  O     18.21638  35.49988  13.77836 6S   68     1.00000
 3713  240 GLY  N     16.63809  33.98644  13.21429 6S   69     1.00000
 3714  240 GLY  HN    15.74205  33.79266  12.82024 6S   69     0.00000
 3715  240 GLY  CA    17.39171  32.85249  13.69520 6S   69     1.00000
 3716  240 GLY  HA1   18.42939  33.12456  13.82008 6S   69     0.00000
 3717  240 GLY  HA2   17.26306  32.06744  12.97089 6S   69     0.00000
 3718  240 GLY  C     16.88444  32.33535  15.00835 6S   69     1.00000
 3719  240 GLY  O     17.26192  31.23723  15.41153 6S   69     1.00000
 3720  241 GLN  N     16.03542  33.10826  15.72385 6S   70     1.00000
 3721  241 GLN  HN    15.74789  34.01132  15.40669 6S   70     0.00000
 3722  241 GLN  CA    15.54203  32.71652  17.02315 6S   70     1.00000
 3723  241 GLN  HA    15.97403  31.77206  17.32175 6S   70     0.00000
 3724  241 GLN  CB    15.86377  33.76728  18.10816 6S   70     1.00000
 3725  241 GLN  HB1   15.61001  33.34475  19.10374 6S   70     0.00000
 3726  241 GLN  HB2   15.24495  34.67652  17.94270 6S   70     0.00000
 3727  241 GLN  CG    17.34684  34.17639  18.10197 6S   70     1.00000
 3728  241 GLN  HG1   17.62884  34.54299  17.09126 6S   70     0.00000
 3729  241 GLN  HG2   17.98050  33.30281  18.36183 6S   70     0.00000
 3730  241 GLN  CD    17.59099  35.29250  19.11569 6S   70     1.00000
 3731  241 GLN  OE1   16.92211  35.38150  20.14752 6S   70     1.00000
 3732  241 GLN  NE2   18.57875  36.17617  18.79568 6S   70     1.00000
 3733  241 GLN  HE21  18.77487  36.93655  19.41286 6S   70     0.00000
 3734  241 GLN  HE22  19.06269  36.08095  17.92697 6S   70     0.00000
 3735  241 GLN  C     14.05600  32.53503  16.94417 6S   70     1.00000
 3736  241 GLN  O     13.41005  32.98519  15.99873 6S   70     1.00000
 3737  242 GLY  N     13.48425  31.85574  17.96457 6S   71     1.00000
 3738  242 GLY  HN    14.03547  31.46921  18.69964 6S   71     0.00000
 3739  242 GLY  CA    12.05686  31.73153  18.11722 6S   71     1.00000
 3740  242 GLY  HA1   11.55829  32.40286  17.44041 6S   71     0.00000
 3741  242 GLY  HA2   11.83144  31.95098  19.14817 6S   71     0.00000
 3742  242 GLY  C     11.56238  30.35566  17.85271 6S   71     1.00000
 3743  242 GLY  O     10.48217  30.00243  18.30538 6S   71     1.00000
 3744  243 VAL  N     12.31481  29.51397  17.11964 6S   72     1.00000
 3745  243 VAL  HN    13.20041  29.77820  16.74915 6S   72     0.00000
 3746  243 VAL  CA    11.85907  28.17887  16.81091 6S   72     1.00000
 3747  243 VAL  HA    10.84348  28.25759  16.46159 6S   72     0.00000
 3748  243 VAL  CB    12.66877  27.54199  15.70053 6S   72     1.00000
 3749  243 VAL  HB    13.75142  27.56063  15.96078 6S   72     0.00000
 3750  243 VAL  CG1   12.22922  26.08538  15.47856 6S   72     1.00000
 3751  243 VAL  HG11  11.12647  26.01498  15.37787 6S   72     0.00000
 3752  243 VAL  HG12  12.56554  25.44467  16.31771 6S   72     0.00000
 3753  243 VAL  HG13  12.68997  25.69556  14.55489 6S   72     0.00000
 3754  243 VAL  CG2   12.46583  28.35914  14.41445 6S   72     1.00000
 3755  243 VAL  HG21  12.80156  29.40762  14.54376 6S   72     0.00000
 3756  243 VAL  HG22  11.39763  28.34618  14.11250 6S   72     0.00000
 3757  243 VAL  HG23  13.06354  27.90624  13.59959 6S   72     0.00000
 3758  243 VAL  C     11.93605  27.33080  18.06595 6S   72     1.00000
 3759  243 VAL  O     12.98958  27.32676  18.70558 6S   72     1.00000
 3760  244 PRO  N     10.88505  26.61165  18.47923 6S   73     1.00000
 3761  244 PRO  CD     9.53348  26.66655  17.91837 6S   73     1.00000
 3762  244 PRO  HD1    9.46660  25.92474  17.09341 6S   73     0.00000
 3763  244 PRO  HD2    9.25820  27.67843  17.55073 6S   73     0.00000
 3764  244 PRO  CA    10.92803  25.80707  19.68283 6S   73     1.00000
 3765  244 PRO  HA    11.27137  26.42299  20.49951 6S   73     0.00000
 3766  244 PRO  CB     9.49030  25.30204  19.87410 6S   73     1.00000
 3767  244 PRO  HB1    9.19460  25.29064  20.94199 6S   73     0.00000
 3768  244 PRO  HB2    9.36292  24.28498  19.44535 6S   73     0.00000
 3769  244 PRO  CG     8.62247  26.26773  19.07214 6S   73     1.00000
 3770  244 PRO  HG1    7.68349  25.79244  18.72902 6S   73     0.00000
 3771  244 PRO  HG2    8.38568  27.16298  19.68499 6S   73     0.00000
 3772  244 PRO  C     11.86468  24.64290  19.52117 6S   73     1.00000
 3773  244 PRO  O     12.18482  24.25090  18.40014 6S   73     1.00000
 3774  245 ILE  N     12.31276  24.08176  20.65341 6S   74     1.00000
 3775  245 ILE  HN    12.04069  24.44093  21.54269 6S   74     0.00000
 3776  245 ILE  CA    13.23621  22.98118  20.66319 6S   74     1.00000
 3777  245 ILE  HA    13.89818  23.06619  19.81084 6S   74     0.00000
 3778  245 ILE  CB    14.07023  22.97201  21.93687 6S   74     1.00000
 3779  245 ILE  HB    13.38998  22.95571  22.81877 6S   74     0.00000
 3780  245 ILE  CG2   14.96822  21.71828  21.98143 6S   74     1.00000
 3781  245 ILE  HG21  15.65817  21.71574  21.11137 6S   74     0.00000
 3782  245 ILE  HG22  14.36231  20.79058  21.97152 6S   74     0.00000
 3783  245 ILE  HG23  15.56984  21.70641  22.91293 6S   74     0.00000
 3784  245 ILE  CG1   14.91514  24.26566  22.01684 6S   74     1.00000
 3785  245 ILE  HG11  14.24357  25.15093  21.97658 6S   74     0.00000
 3786  245 ILE  HG12  15.58902  24.30974  21.13280 6S   74     0.00000
 3787  245 ILE  CD    15.75929  24.36150  23.29010 6S   74     1.00000
 3788  245 ILE  HD1   16.48346  23.52514  23.35981 6S   74     0.00000
 3789  245 ILE  HD2   15.10754  24.35090  24.18934 6S   74     0.00000
 3790  245 ILE  HD3   16.34596  25.29944  23.28590 6S   74     0.00000
 3791  245 ILE  C     12.42980  21.71522  20.52708 6S   74     1.00000
 3792  245 ILE  O     11.50502  21.46863  21.29995 6S   74     1.00000
 3793  246 ASN  N     12.77093  20.88758  19.51454 6S   75     1.00000
 3794  246 ASN  HN    13.47714  21.13171  18.85314 6S   75     0.00000
 3795  246 ASN  CA    12.15456  19.60128  19.33103 6S   75     1.00000
 3796  246 ASN  HA    11.77842  19.24187  20.27977 6S   75     0.00000
 3797  246 ASN  CB    11.00107  19.66901  18.30246 6S   75     1.00000
 3798  246 ASN  HB1   11.37889  20.06255  17.33837 6S   75     0.00000
 3799  246 ASN  HB2   10.24828  20.38612  18.68461 6S   75     0.00000
 3800  246 ASN  CG    10.30946  18.31504  18.09574 6S   75     1.00000
 3801  246 ASN  OD1   10.46897  17.37740  18.88433 6S   75     1.00000
 3802  246 ASN  ND2    9.52060  18.22285  16.98842 6S   75     1.00000
 3803  246 ASN  HD21   9.06145  17.35823  16.78824 6S   75     0.00000
 3804  246 ASN  HD22   9.42066  19.01367  16.38413 6S   75     0.00000
 3805  246 ASN  C     13.24134  18.67141  18.86235 6S   75     1.00000
 3806  246 ASN  O     13.79614  18.83039  17.77821 6S   75     1.00000
 3807  247 THR  N     13.55810  17.64503  19.68039 6S   76     1.00000
 3808  247 THR  HN    13.10918  17.52435  20.56333 6S   76     0.00000
 3809  247 THR  CA    14.59133  16.67658  19.37804 6S   76     1.00000
 3810  247 THR  HA    15.45501  17.22255  19.02304 6S   76     0.00000
 3811  247 THR  CB    14.98953  15.85059  20.59304 6S   76     1.00000
 3812  247 THR  HB    15.74061  15.07953  20.30656 6S   76     0.00000
 3813  247 THR  OG1   13.86642  15.20044  21.18221 6S   76     1.00000
 3814  247 THR  HG1   13.76462  14.36978  20.71013 6S   76     0.00000
 3815  247 THR  CG2   15.62901  16.77601  21.64571 6S   76     1.00000
 3816  247 THR  HG21  14.91662  17.56037  21.97632 6S   76     0.00000
 3817  247 THR  HG22  16.53444  17.26642  21.23078 6S   76     0.00000
 3818  247 THR  HG23  15.92815  16.18007  22.53460 6S   76     0.00000
 3819  247 THR  C     14.18055  15.74265  18.26438 6S   76     1.00000
 3820  247 THR  O     15.03030  15.22182  17.54575 6S   76     1.00000
 3821  248 ASN  N     12.85895  15.52773  18.08229 6S   77     1.00000
 3822  248 ASN  HN    12.18102  15.94299  18.68798 6S   77     0.00000
 3823  248 ASN  CA    12.33565  14.68833  17.02987 6S   77     1.00000
 3824  248 ASN  HA    13.07635  13.95067  16.75264 6S   77     0.00000
 3825  248 ASN  CB    11.03767  13.98083  17.48758 6S   77     1.00000
 3826  248 ASN  HB1   10.54197  13.47444  16.63288 6S   77     0.00000
 3827  248 ASN  HB2   10.34327  14.73407  17.91968 6S   77     0.00000
 3828  248 ASN  CG    11.35774  12.91312  18.54245 6S   77     1.00000
 3829  248 ASN  OD1   12.47533  12.39433  18.63153 6S   77     1.00000
 3830  248 ASN  ND2   10.31886  12.56710  19.35650 6S   77     1.00000
 3831  248 ASN  HD21  10.45822  11.86882  20.05693 6S   77     0.00000
 3832  248 ASN  HD22   9.43182  13.01284  19.24488 6S   77     0.00000
 3833  248 ASN  C     12.05114  15.51331  15.79206 6S   77     1.00000
 3834  248 ASN  O     10.98729  15.40369  15.18272 6S   77     1.00000
 3835  249 SER  N     13.02544  16.34693  15.36533 6S   78     1.00000
 3836  249 SER  HN    13.88167  16.45348  15.86959 6S   78     0.00000
 3837  249 SER  CA    12.89727  17.10467  14.14633 6S   78     1.00000
 3838  249 SER  HA    12.46465  16.46479  13.38999 6S   78     0.00000
 3839  249 SER  CB    12.01991  18.36596  14.30636 6S   78     1.00000
 3840  249 SER  HB1   10.98242  18.05759  14.55732 6S   78     0.00000
 3841  249 SER  HB2   11.99637  18.95293  13.36604 6S   78     0.00000
 3842  249 SER  OG    12.50641  19.20462  15.34163 6S   78     1.00000
 3843  249 SER  HG1   12.86868  18.62064  16.01978 6S   78     0.00000
 3844  249 SER  C     14.27367  17.48441  13.68118 6S   78     1.00000
 3845  249 SER  O     15.18597  17.68535  14.48090 6S   78     1.00000
 3846  250 SER  N     14.45034  17.58032  12.34714 6S   79     1.00000
 3847  250 SER  HN    13.69460  17.45691  11.70576 6S   79     0.00000
 3848  250 SER  CA    15.73798  17.82055  11.74244 6S   79     1.00000
 3849  250 SER  HA    16.48678  17.35303  12.36298 6S   79     0.00000
 3850  250 SER  CB    15.80868  17.20621  10.32429 6S   79     1.00000
 3851  250 SER  HB1   15.59377  16.11901  10.40031 6S   79     0.00000
 3852  250 SER  HB2   16.81529  17.34054   9.88561 6S   79     0.00000
 3853  250 SER  OG    14.86491  17.77425   9.43065 6S   79     1.00000
 3854  250 SER  HG1   15.31760  18.46239   8.93889 6S   79     0.00000
 3855  250 SER  C     16.02004  19.30097  11.65882 6S   79     1.00000
 3856  250 SER  O     15.09443  20.09042  11.81879 6S   79     1.00000
 3857  251 PRO  N     17.24251  19.74511  11.36449 6S   80     1.00000
 3858  251 PRO  CD    18.46253  18.94574  11.50876 6S   80     1.00000
 3859  251 PRO  HD1   18.62648  18.37901  10.56825 6S   80     0.00000
 3860  251 PRO  HD2   18.41404  18.24871  12.37446 6S   80     0.00000
 3861  251 PRO  CA    17.54599  21.15959  11.18684 6S   80     1.00000
 3862  251 PRO  HA    17.23212  21.68755  12.07099 6S   80     0.00000
 3863  251 PRO  CB    19.05900  21.20140  10.96443 6S   80     1.00000
 3864  251 PRO  HB1   19.50363  22.13429  11.36493 6S   80     0.00000
 3865  251 PRO  HB2   19.31031  21.09884   9.88436 6S   80     0.00000
 3866  251 PRO  CG    19.57750  19.96861  11.70592 6S   80     1.00000
 3867  251 PRO  HG1   20.54724  19.61817  11.30082 6S   80     0.00000
 3868  251 PRO  HG2   19.67624  20.20174  12.78849 6S   80     0.00000
 3869  251 PRO  C     16.83040  21.76343  10.01361 6S   80     1.00000
 3870  251 PRO  O     16.59388  22.96920  10.01027 6S   80     1.00000
 3871  252 ASP  N     16.43677  20.93280   9.03002 6S   81     1.00000
 3872  252 ASP  HN    16.74120  19.98409   8.99957 6S   81     0.00000
 3873  252 ASP  CA    15.71880  21.36399   7.86367 6S   81     1.00000
 3874  252 ASP  HA    16.18246  22.25859   7.48055 6S   81     0.00000
 3875  252 ASP  CB    15.71171  20.28878   6.74956 6S   81     1.00000
 3876  252 ASP  HB1   15.17238  20.68558   5.86349 6S   81     0.00000
 3877  252 ASP  HB2   15.17058  19.38201   7.08538 6S   81     0.00000
 3878  252 ASP  CG    17.12961  19.89377   6.30867 6S   81     1.00000
 3879  252 ASP  OD1   18.12961  20.24753   6.98653 6S   81     1.00000
 3880  252 ASP  OD2   17.22308  19.20032   5.26290 6S   81     1.00000
 3881  252 ASP  C     14.29800  21.70739   8.20526 6S   81     1.00000
 3882  252 ASP  O     13.59054  22.21551   7.34611 6S   81     1.00000
 3883  253 ASP  N     13.86372  21.46133   9.46448 6S   82     1.00000
 3884  253 ASP  HN    14.48300  21.09025  10.15446 6S   82     0.00000
 3885  253 ASP  CA    12.50301  21.62626   9.89284 6S   82     1.00000
 3886  253 ASP  HA    11.89367  21.79323   9.03658 6S   82     0.00000
 3887  253 ASP  CB    11.96353  20.38233  10.61379 6S   82     1.00000
 3888  253 ASP  HB1   10.88848  20.51253  10.86324 6S   82     0.00000
 3889  253 ASP  HB2   12.53354  20.21368  11.55286 6S   82     0.00000
 3890  253 ASP  CG    12.08282  19.13895   9.74752 6S   82     1.00000
 3891  253 ASP  OD1   11.99460  19.21188   8.49382 6S   82     1.00000
 3892  253 ASP  OD2   12.21906  18.05678  10.37592 6S   82     1.00000
 3893  253 ASP  C     12.31606  22.79653  10.81490 6S   82     1.00000
 3894  253 ASP  O     11.19840  23.04858  11.25998 6S   82     1.00000
 3895  254 GLN  N     13.39074  23.54774  11.13325 6S   83     1.00000
 3896  254 GLN  HN    14.28492  23.38847  10.72066 6S   83     0.00000
 3897  254 GLN  CA    13.34809  24.54131  12.17885 6S   83     1.00000
 3898  254 GLN  HA    12.63366  24.23622  12.93086 6S   83     0.00000
 3899  254 GLN  CB    14.72466  24.68881  12.85593 6S   83     1.00000
 3900  254 GLN  HB1   14.64389  25.38321  13.71891 6S   83     0.00000
 3901  254 GLN  HB2   15.44973  25.11124  12.12530 6S   83     0.00000
 3902  254 GLN  CG    15.30715  23.36027  13.35852 6S   83     1.00000
 3903  254 GLN  HG1   16.27105  23.54061  13.87780 6S   83     0.00000
 3904  254 GLN  HG2   15.49465  22.70797  12.48146 6S   83     0.00000
 3905  254 GLN  CD    14.33732  22.67567  14.32523 6S   83     1.00000
 3906  254 GLN  OE1   13.87628  23.26555  15.30639 6S   83     1.00000
 3907  254 GLN  NE2   14.02237  21.38629  14.02365 6S   83     1.00000
 3908  254 GLN  HE21  13.40750  20.86365  14.61520 6S   83     0.00000
 3909  254 GLN  HE22  14.42958  20.95349  13.21554 6S   83     0.00000
 3910  254 GLN  C     12.89247  25.86724  11.63829 6S   83     1.00000
 3911  254 GLN  O     13.67063  26.80573  11.50684 6S   83     1.00000
 3912  255 ILE  N     11.59170  25.95751  11.30239 6S   84     1.00000
 3913  255 ILE  HN    10.98271  25.17425  11.41370 6S   84     0.00000
 3914  255 ILE  CA    11.03460  27.10889  10.64849 6S   84     1.00000
 3915  255 ILE  HA    11.32091  27.97831  11.21897 6S   84     0.00000
 3916  255 ILE  CB    11.50354  27.26345   9.19840 6S   84     1.00000
 3917  255 ILE  HB    12.59010  27.52225   9.21813 6S   84     0.00000
 3918  255 ILE  CG2   11.36096  25.93586   8.43749 6S   84     1.00000
 3919  255 ILE  HG21  10.28700  25.72164   8.25676 6S   84     0.00000
 3920  255 ILE  HG22  11.81539  25.09263   8.99202 6S   84     0.00000
 3921  255 ILE  HG23  11.87918  25.99789   7.45890 6S   84     0.00000
 3922  255 ILE  CG1   10.77241  28.39275   8.44850 6S   84     1.00000
 3923  255 ILE  HG11  10.90303  29.33674   9.01271 6S   84     0.00000
 3924  255 ILE  HG12   9.68442  28.16946   8.41182 6S   84     0.00000
 3925  255 ILE  CD    11.27596  28.57017   7.01720 6S   84     1.00000
 3926  255 ILE  HD1   10.96857  27.70490   6.39129 6S   84     0.00000
 3927  255 ILE  HD2   12.38400  28.64201   7.00250 6S   84     0.00000
 3928  255 ILE  HD3   10.84475  29.48958   6.57332 6S   84     0.00000
 3929  255 ILE  C      9.53737  26.98736  10.74499 6S   84     1.00000
 3930  255 ILE  O      8.96315  25.91475  10.55476 6S   84     1.00000
 3931  256 GLY  N      8.86140  28.11183  11.06351 6S   85     1.00000
 3932  256 GLY  HN     9.32636  28.98669  11.21020 6S   85     0.00000
 3933  256 GLY  CA     7.43011  28.10690  11.17886 6S   85     1.00000
 3934  256 GLY  HA1    7.15856  27.38223  11.93153 6S   85     0.00000
 3935  256 GLY  HA2    7.01352  27.91305  10.20080 6S   85     0.00000
 3936  256 GLY  C      6.96108  29.44782  11.62794 6S   85     1.00000
 3937  256 GLY  O      7.68232  30.43864  11.54990 6S   85     1.00000
 3938  257 TYR  N      5.70145  29.50274  12.09947 6S   86     1.00000
 3939  257 TYR  HN     5.13877  28.68021  12.17382 6S   86     0.00000
 3940  257 TYR  CA     5.05923  30.73335  12.47408 6S   86     1.00000
 3941  257 TYR  HA     5.80400  31.51020  12.56173 6S   86     0.00000
 3942  257 TYR  CB     3.98936  31.19690  11.44636 6S   86     1.00000
 3943  257 TYR  HB1    4.46312  31.30125  10.45549 6S   86     0.00000
 3944  257 TYR  HB2    3.57381  32.18519  11.73239 6S   86     0.00000
 3945  257 TYR  CG     2.85128  30.23083  11.29128 6S   86     1.00000
 3946  257 TYR  CD1    2.97577  29.09412  10.47588 6S   86     1.00000
 3947  257 TYR  HD1    3.89735  28.90756   9.94451 6S   86     0.00000
 3948  257 TYR  CE1    1.91388  28.19525  10.35490 6S   86     1.00000
 3949  257 TYR  HE1    2.02422  27.31941   9.73275 6S   86     0.00000
 3950  257 TYR  CZ     0.72348  28.43849  11.05101 6S   86     1.00000
 3951  257 TYR  OH    -0.34484  27.54290  10.95900 6S   86     1.00000
 3952  257 TYR  HH    -0.06035  26.82940  10.37330 6S   86     0.00000
 3953  257 TYR  CD2    1.65464  30.45004  11.99405 6S   86     1.00000
 3954  257 TYR  HD2    1.55691  31.31296  12.63552 6S   86     0.00000
 3955  257 TYR  CE2    0.59382  29.55168  11.88071 6S   86     1.00000
 3956  257 TYR  HE2   -0.32347  29.71676  12.42624 6S   86     0.00000
 3957  257 TYR  C      4.41701  30.58100  13.82038 6S   86     1.00000
 3958  257 TYR  O      3.93713  29.50992  14.18083 6S   86     1.00000
 3959  258 TYR  N      4.35795  31.69336  14.57474 6S   87     1.00000
 3960  258 TYR  HN     4.84037  32.52306  14.29956 6S   87     0.00000
 3961  258 TYR  CA     3.54123  31.80183  15.75435 6S   87     1.00000
 3962  258 TYR  HA     3.31166  30.81937  16.13484 6S   87     0.00000
 3963  258 TYR  CB     4.21070  32.64817  16.84744 6S   87     1.00000
 3964  258 TYR  HB1    3.47954  32.99652  17.60416 6S   87     0.00000
 3965  258 TYR  HB2    4.69388  33.52397  16.39050 6S   87     0.00000
 3966  258 TYR  CG     5.26802  31.87637  17.55913 6S   87     1.00000
 3967  258 TYR  CD1    6.59012  31.83795  17.08651 6S   87     1.00000
 3968  258 TYR  HD1    6.85905  32.34950  16.17361 6S   87     0.00000
 3969  258 TYR  CE1    7.56866  31.14051  17.80020 6S   87     1.00000
 3970  258 TYR  HE1    8.57476  31.12113  17.42096 6S   87     0.00000
 3971  258 TYR  CZ     7.23433  30.48436  18.99200 6S   87     1.00000
 3972  258 TYR  OH     8.20478  29.77623  19.72108 6S   87     1.00000
 3973  258 TYR  HH     9.03424  29.84170  19.23274 6S   87     0.00000
 3974  258 TYR  CD2    4.94311  31.21506  18.75085 6S   87     1.00000
 3975  258 TYR  HD2    3.93276  31.24313  19.12879 6S   87     0.00000
 3976  258 TYR  CE2    5.92281  30.53186  19.46904 6S   87     1.00000
 3977  258 TYR  HE2    5.64934  30.02825  20.38084 6S   87     0.00000
 3978  258 TYR  C      2.25211  32.48593  15.38049 6S   87     1.00000
 3979  258 TYR  O      2.23695  33.40711  14.56753 6S   87     1.00000
 3980  259 ARG  N      1.13240  32.03174  15.98122 6S   88     1.00000
 3981  259 ARG  HN     1.16612  31.25485  16.61098 6S   88     0.00000
 3982  259 ARG  CA    -0.17893  32.55423  15.72175 6S   88     1.00000
 3983  259 ARG  HA    -0.10549  33.42555  15.09657 6S   88     0.00000
 3984  259 ARG  CB    -1.07992  31.51861  15.03330 6S   88     1.00000
 3985  259 ARG  HB1   -1.07854  30.57202  15.61793 6S   88     0.00000
 3986  259 ARG  HB2   -0.65294  31.29599  14.03022 6S   88     0.00000
 3987  259 ARG  CG    -2.52697  31.98162  14.84111 6S   88     1.00000
 3988  259 ARG  HG1   -2.54242  32.93605  14.26942 6S   88     0.00000
 3989  259 ARG  HG2   -2.98487  32.17475  15.83802 6S   88     0.00000
 3990  259 ARG  CD    -3.32878  30.91157  14.10963 6S   88     1.00000
 3991  259 ARG  HD1   -3.22444  29.93106  14.62413 6S   88     0.00000
 3992  259 ARG  HD2   -2.98058  30.81308  13.06082 6S   88     0.00000
 3993  259 ARG  NE    -4.76301  31.31736  14.08866 6S   88     1.00000
 3994  259 ARG  HE    -5.11101  31.81168  13.29355 6S   88     0.00000
 3995  259 ARG  CZ    -5.61785  31.02805  15.10937 6S   88     1.00000
 3996  259 ARG  NH1   -5.19566  30.36496  16.21775 6S   88     1.00000
 3997  259 ARG  HH11  -4.23565  30.10124  16.28961 6S   88     0.00000
 3998  259 ARG  HH12  -5.83762  30.16253  16.95366 6S   88     0.00000
 3999  259 ARG  NH2   -6.91705  31.40503  15.00703 6S   88     1.00000
 4000  259 ARG  HH21  -7.22145  31.89327  14.19158 6S   88     0.00000
 4001  259 ARG  HH22  -7.55161  31.19994  15.74871 6S   88     0.00000
 4002  259 ARG  C     -0.81833  32.96113  17.01212 6S   88     1.00000
 4003  259 ARG  O     -0.90044  32.18248  17.95604 6S   88     1.00000
 4004  260 ARG  N     -1.32768  34.20631  17.06255 6S   89     1.00000
 4005  260 ARG  HN    -1.27679  34.81485  16.26984 6S   89     0.00000
 4006  260 ARG  CA    -1.95150  34.75687  18.23318 6S   89     1.00000
 4007  260 ARG  HA    -1.42034  34.41234  19.10935 6S   89     0.00000
 4008  260 ARG  CB    -1.89302  36.28669  18.18151 6S   89     1.00000
 4009  260 ARG  HB1   -2.35218  36.63541  17.23137 6S   89     0.00000
 4010  260 ARG  HB2   -0.82843  36.58192  18.15166 6S   89     0.00000
 4011  260 ARG  CG    -2.52456  37.01315  19.37312 6S   89     1.00000
 4012  260 ARG  HG1   -1.99704  36.71023  20.30495 6S   89     0.00000
 4013  260 ARG  HG2   -3.59447  36.72764  19.46644 6S   89     0.00000
 4014  260 ARG  CD    -2.41826  38.52555  19.22595 6S   89     1.00000
 4015  260 ARG  HD1   -1.35385  38.81093  19.08655 6S   89     0.00000
 4016  260 ARG  HD2   -2.85544  39.05483  20.09539 6S   89     0.00000
 4017  260 ARG  NE    -3.19228  38.92098  18.01946 6S   89     1.00000
 4018  260 ARG  HE    -3.92307  38.32745  17.68219 6S   89     0.00000
 4019  260 ARG  CZ    -2.90209  40.04981  17.32375 6S   89     1.00000
 4020  260 ARG  NH1   -1.87802  40.86828  17.67341 6S   89     1.00000
 4021  260 ARG  HH11  -1.32912  40.65786  18.48089 6S   89     0.00000
 4022  260 ARG  HH12  -1.71211  41.70384  17.15239 6S   89     0.00000
 4023  260 ARG  NH2   -3.66315  40.35218  16.25216 6S   89     1.00000
 4024  260 ARG  HH21  -4.45574  39.79755  16.00965 6S   89     0.00000
 4025  260 ARG  HH22  -3.40842  41.10319  15.63695 6S   89     0.00000
 4026  260 ARG  C     -3.39491  34.33963  18.32275 6S   89     1.00000
 4027  260 ARG  O     -4.12863  34.36414  17.33573 6S   89     1.00000
 4028  261 ALA  N     -3.82261  33.95227  19.54341 6S   90     1.00000
 4029  261 ALA  HN    -3.18146  33.88910  20.30907 6S   90     0.00000
 4030  261 ALA  CA    -5.18205  33.59621  19.84340 6S   90     1.00000
 4031  261 ALA  HA    -5.82416  33.89423  19.02703 6S   90     0.00000
 4032  261 ALA  CB    -5.32803  32.08684  20.09357 6S   90     1.00000
 4033  261 ALA  HB1   -4.68151  31.76587  20.93763 6S   90     0.00000
 4034  261 ALA  HB2   -5.01244  31.52951  19.18559 6S   90     0.00000
 4035  261 ALA  HB3   -6.38242  31.82509  20.32148 6S   90     0.00000
 4036  261 ALA  C     -5.60067  34.34937  21.07932 6S   90     1.00000
 4037  261 ALA  O     -5.11662  34.08693  22.18133 6S   90     1.00000
 4038  262 THR  N     -6.51590  35.32978  20.90304 6S   91     1.00000
 4039  262 THR  HN    -6.87992  35.54023  19.99962 6S   91     0.00000
 4040  262 THR  CA    -6.93652  36.23448  21.95264 6S   91     1.00000
 4041  262 THR  HA    -6.28161  36.11529  22.80516 6S   91     0.00000
 4042  262 THR  CB    -6.91917  37.69565  21.51530 6S   91     1.00000
 4043  262 THR  HB    -7.88435  37.99038  21.04487 6S   91     0.00000
 4044  262 THR  OG1   -5.87747  37.92284  20.57238 6S   91     1.00000
 4045  262 THR  HG1   -5.85531  38.87128  20.42760 6S   91     0.00000
 4046  262 THR  CG2   -6.64737  38.58921  22.73207 6S   91     1.00000
 4047  262 THR  HG21  -5.67136  38.33052  23.18761 6S   91     0.00000
 4048  262 THR  HG22  -7.43240  38.44904  23.49979 6S   91     0.00000
 4049  262 THR  HG23  -6.62960  39.66013  22.43359 6S   91     0.00000
 4050  262 THR  C     -8.33329  35.85906  22.37361 6S   91     1.00000
 4051  262 THR  O     -9.17229  35.52266  21.53865 6S   91     1.00000
 4052  263 ARG  N     -8.60497  35.89979  23.69640 6S   92     1.00000
 4053  263 ARG  HN    -7.91946  36.18559  24.36175 6S   92     0.00000
 4054  263 ARG  CA    -9.88601  35.53100  24.24494 6S   92     1.00000
 4055  263 ARG  HA   -10.63579  35.52916  23.46705 6S   92     0.00000
 4056  263 ARG  CB    -9.86164  34.14294  24.91517 6S   92     1.00000
 4057  263 ARG  HB1   -9.59404  33.40070  24.12996 6S   92     0.00000
 4058  263 ARG  HB2  -10.86738  33.87200  25.30465 6S   92     0.00000
 4059  263 ARG  CG    -8.84627  34.00984  26.05353 6S   92     1.00000
 4060  263 ARG  HG1   -9.29437  34.40955  26.98490 6S   92     0.00000
 4061  263 ARG  HG2   -7.95338  34.63150  25.82635 6S   92     0.00000
 4062  263 ARG  CD    -8.42222  32.55019  26.24443 6S   92     1.00000
 4063  263 ARG  HD1   -7.91442  32.16814  25.33206 6S   92     0.00000
 4064  263 ARG  HD2   -9.30160  31.91516  26.47450 6S   92     0.00000
 4065  263 ARG  NE    -7.47790  32.44110  27.38899 6S   92     1.00000
 4066  263 ARG  HE    -7.78656  32.00742  28.23533 6S   92     0.00000
 4067  263 ARG  CZ    -6.19771  32.89115  27.31243 6S   92     1.00000
 4068  263 ARG  NH1   -5.37562  32.72058  28.36596 6S   92     1.00000
 4069  263 ARG  HH11  -5.71868  32.29192  29.20682 6S   92     0.00000
 4070  263 ARG  HH12  -4.43385  33.04441  28.34523 6S   92     0.00000
 4071  263 ARG  NH2   -5.70126  33.48544  26.20140 6S   92     1.00000
 4072  263 ARG  HH21  -4.80006  33.91822  26.25165 6S   92     0.00000
 4073  263 ARG  HH22  -6.25286  33.52419  25.37366 6S   92     0.00000
 4074  263 ARG  C    -10.29596  36.55915  25.24596 6S   92     1.00000
 4075  263 ARG  O     -9.51064  37.40547  25.66586 6S   92     1.00000
 4076  264 ARG  N    -11.58138  36.50143  25.63721 6S   93     1.00000
 4077  264 ARG  HN   -12.20493  35.79271  25.32130 6S   93     0.00000
 4078  264 ARG  CA   -12.16168  37.40081  26.57350 6S   93     1.00000
 4079  264 ARG  HA   -11.42590  38.12038  26.89305 6S   93     0.00000
 4080  264 ARG  CB   -13.25251  38.27731  25.86663 6S   93     1.00000
 4081  264 ARG  HB1  -13.60187  39.07489  26.56264 6S   93     0.00000
 4082  264 ARG  HB2  -14.13367  37.65400  25.60348 6S   93     0.00000
 4083  264 ARG  CG   -12.79410  38.98759  24.57385 6S   93     1.00000
 4084  264 ARG  HG1  -13.29549  38.50340  23.70490 6S   93     0.00000
 4085  264 ARG  HG2  -11.69612  38.88136  24.43880 6S   93     0.00000
 4086  264 ARG  CD   -13.12947  40.48050  24.60603 6S   93     1.00000
 4087  264 ARG  HD1  -12.43129  41.00810  25.29269 6S   93     0.00000
 4088  264 ARG  HD2  -14.18125  40.63387  24.93081 6S   93     0.00000
 4089  264 ARG  NE   -12.97911  41.05834  23.23905 6S   93     1.00000
 4090  264 ARG  HE   -12.77119  40.45603  22.46955 6S   93     0.00000
 4091  264 ARG  CZ   -13.15205  42.38910  23.00872 6S   93     1.00000
 4092  264 ARG  NH1  -13.44505  43.24077  24.02622 6S   93     1.00000
 4093  264 ARG  HH11 -13.54103  42.87841  24.94897 6S   93     0.00000
 4094  264 ARG  HH12 -13.56568  44.21382  23.84050 6S   93     0.00000
 4095  264 ARG  NH2  -13.03091  42.86759  21.74533 6S   93     1.00000
 4096  264 ARG  HH21 -12.81601  42.23764  21.00164 6S   93     0.00000
 4097  264 ARG  HH22 -13.15085  43.84254  21.57089 6S   93     0.00000
 4098  264 ARG  C    -12.61732  36.45509  27.74414 6S   93     1.00000
 4099  264 ARG  O    -13.01524  35.32616  27.46540 6S   93     1.00000
 4100  265 ILE  N    -12.70175  37.00977  29.03334 6S   94     1.00000
 4101  265 ILE  HN   -12.33401  37.92163  29.03267 6S   94     0.00000
 4102  265 ILE  CA   -13.16977  36.81482  30.47049 6S   94     1.00000
 4103  265 ILE  HA   -13.28969  35.72080  30.44636 6S   94     0.00000
 4104  265 ILE  CB   -12.25334  37.13788  31.64670 6S   94     1.00000
 4105  265 ILE  HB   -12.67687  37.49415  32.63044 6S   94     0.00000
 4106  265 ILE  CG2  -11.36860  38.01869  30.90517 6S   94     0.00000
 4107  265 ILE  HG21 -12.30554  38.88407  30.51842 6S   94     0.00000
 4108  265 ILE  HG22 -10.98497  36.85278  30.30376 6S   94     0.00000
 4109  265 ILE  HG23  -9.97571  38.96184  31.21262 6S   94     0.00000
 4110  265 ILE  CG1  -11.21678  37.99393  31.62198 6S   94     0.00000
 4111  265 ILE  HG11 -10.37354  37.32938  32.21882 6S   94     0.00000
 4112  265 ILE  HG12 -11.42555  38.98693  32.38343 6S   94     0.00000
 4113  265 ILE  CD   -10.56428  38.63980  29.36102 6S   94     0.00000
 4114  265 ILE  HD1  -11.52356  38.91030  28.92932 6S   94     0.00000
 4115  265 ILE  HD2  -10.48933  37.84352  28.64880 6S   94     0.00000
 4116  265 ILE  HD3   -9.82023  39.37294  29.43101 6S   94     0.00000
 4117  265 ILE  C    -14.35452  37.60338  31.27269 6S   94     1.00000
 4118  265 ILE  O    -14.85124  36.73853  32.01105 6S   94     1.00000
 4119  266 ARG  N    -15.10519  38.96124  30.95160 6S   95     1.00000
 4120  266 ARG  HN   -14.50979  39.37054  30.25952 6S   95     0.00000
 4121  266 ARG  CA   -16.95747  39.29941  30.73539 6S   95     1.00000
 4122  266 ARG  HA   -16.94332  40.38726  30.50596 6S   95     0.00000
 4123  266 ARG  CB   -18.40642  38.18829  29.44944 6S   95     1.00000
 4124  266 ARG  HB1  -18.62945  38.58766  28.46248 6S   95     0.00000
 4125  266 ARG  HB2  -18.74754  37.31587  29.99777 6S   95     0.00000
 4126  266 ARG  CG   -17.80332  36.76126  28.09179 6S   95     0.00000
 4127  266 ARG  HG1  -17.46399  37.06850  27.11861 6S   95     0.00000
 4128  266 ARG  HG2  -17.66353  35.80028  28.67948 6S   95     0.00000
 4129  266 ARG  CD   -15.92194  36.32242  27.87115 6S   95     0.00000
 4130  266 ARG  HD1  -15.35353  36.24871  26.97320 6S   95     0.00000
 4131  266 ARG  HD2  -15.39791  35.62745  28.63780 6S   95     0.00000
 4132  266 ARG  NE   -15.03874  37.49167  28.10311 6S   95     0.00000
 4133  266 ARG  HE   -14.29169  37.63691  28.80433 6S   95     0.00000
 4134  266 ARG  CZ   -15.85144  37.94432  28.77317 6S   95     0.00000
 4135  266 ARG  NH1  -16.26732  37.07151  29.92490 6S   95     0.00000
 4136  266 ARG  HH11 -17.09744  37.18373  30.52823 6S   95     0.00000
 4137  266 ARG  HH12 -16.87728  37.85001  29.92032 6S   95     0.00000
 4138  266 ARG  NH2  -16.33109  39.13026  28.25303 6S   95     0.00000
 4139  266 ARG  HH21 -16.89554  39.47385  29.00357 6S   95     0.00000
 4140  266 ARG  HH22 -17.24557  38.93666  27.86865 6S   95     0.00000
 4141  266 ARG  C    -17.14276  39.11283  32.11166 6S   95     1.00000
 4142  266 ARG  O    -18.16190  38.58668  32.50854 6S   95     1.00000
 4143  267 GLY  N    -16.07243  39.47903  32.86155 6S   96     1.00000
 4144  267 GLY  HN   -15.17295  39.67714  32.44581 6S   96     0.00000
 4145  267 GLY  CA   -16.02247  39.50699  34.22284 6S   96     1.00000
 4146  267 GLY  HA1  -15.01160  39.25939  34.51315 6S   96     0.00000
 4147  267 GLY  HA2  -16.82413  38.86706  34.54530 6S   96     0.00000
 4148  267 GLY  C    -16.33105  40.94527  34.32086 6S   96     1.00000
 4149  267 GLY  O    -15.52958  41.82381  34.01343 6S   96     1.00000
 4150  268 GLY  N    -17.57682  41.20607  34.71446 6S   97     1.00000
 4151  268 GLY  HN   -18.21841  40.46185  34.86458 6S   97     0.00000
 4152  268 GLY  CA   -17.99808  42.52839  35.05877 6S   97     1.00000
 4153  268 GLY  HA1  -19.05854  42.45473  35.23947 6S   97     0.00000
 4154  268 GLY  HA2  -17.75218  43.20317  34.24535 6S   97     0.00000
 4155  268 GLY  C    -17.31493  42.91751  36.39059 6S   97     1.00000
 4156  268 GLY  OT1  -17.98771  43.60009  37.20126 6S   97     1.00000
 4157  268 GLY  OT2  -16.15270  42.50501  36.65361 6S   97     0.00000
 4158  269 LYS  N    -13.05303  42.02284  28.17970 7S   102    1.00000
 4159  269 LYS  HT1  -12.78143  42.81209  27.53295 7S   102    0.00000
 4160  269 LYS  HT2  -13.64473  42.84380  28.39342 7S   102    0.00000
 4161  269 LYS  HT3  -13.97729  41.62148  28.38732 7S   102    0.00000
 4162  269 LYS  CA   -12.00734  41.68942  29.51705 7S   102    1.00000
 4163  269 LYS  HA   -11.41649  42.51996  29.90951 7S   102    0.00000
 4164  269 LYS  CB   -12.12279  41.55321  31.16126 7S   102    1.00000
 4165  269 LYS  HB1  -11.56948  42.27536  31.83988 7S   102    0.00000
 4166  269 LYS  HB2  -11.56647  40.65135  31.42143 7S   102    0.00000
 4167  269 LYS  CG   -13.47172  41.57668  31.85914 7S   102    0.00000
 4168  269 LYS  HG1  -13.49325  42.11680  32.83640 7S   102    0.00000
 4169  269 LYS  HG2  -13.69052  40.51414  32.12277 7S   102    0.00000
 4170  269 LYS  CD   -14.58006  42.23687  31.07543 7S   102    0.00000
 4171  269 LYS  HD1  -15.36230  42.71955  31.68568 7S   102    0.00000
 4172  269 LYS  HD2  -15.10669  41.34244  30.66019 7S   102    0.00000
 4173  269 LYS  CE   -14.34503  43.40401  30.04606 7S   102    0.00000
 4174  269 LYS  HE1  -15.12426  44.09483  29.88622 7S   102    0.00000
 4175  269 LYS  HE2  -14.69819  42.62046  29.33116 7S   102    0.00000
 4176  269 LYS  NZ   -12.96508  44.11115  29.56371 7S   102    0.00000
 4177  269 LYS  HZ1  -12.60036  43.22051  29.18083 7S   102    0.00000
 4178  269 LYS  HZ2  -12.20445  43.93209  30.24601 7S   102    0.00000
 4179  269 LYS  HZ3  -12.63081  44.12427  28.55334 7S   102    0.00000
 4180  269 LYS  C    -11.12821  41.28582  28.53601 7S   102    1.00000
 4181  269 LYS  O    -11.55084  40.45543  27.74662 7S   102    1.00000
 4182  270 ASP  N     -9.97975  41.86940  28.28253 7S   103    1.00000
 4183  270 ASP  HN    -9.77445  42.83153  28.44378 7S   103    0.00000
 4184  270 ASP  CA    -9.27026  41.15515  27.25671 7S   103    1.00000
 4185  270 ASP  HA    -9.85208  40.42176  26.70552 7S   103    0.00000
 4186  270 ASP  CB    -8.71793  42.08625  26.19304 7S   103    1.00000
 4187  270 ASP  HB1   -7.91445  42.69322  26.64776 7S   103    0.00000
 4188  270 ASP  HB2   -9.52575  42.75918  25.82793 7S   103    0.00000
 4189  270 ASP  CG    -8.18359  41.29372  25.00168 7S   103    1.00000
 4190  270 ASP  OD1   -8.37446  40.05096  24.96025 7S   103    1.00000
 4191  270 ASP  OD2   -7.58616  41.93870  24.10462 7S   103    1.00000
 4192  270 ASP  C     -8.21139  40.41791  27.99397 7S   103    1.00000
 4193  270 ASP  O     -7.49383  41.01135  28.79315 7S   103    1.00000
 4194  271 LEU  N     -8.16865  39.07216  27.80771 7S   104    1.00000
 4195  271 LEU  HN    -8.87244  38.60639  27.26974 7S   104    0.00000
 4196  271 LEU  CA    -7.28085  38.22366  28.55567 7S   104    1.00000
 4197  271 LEU  HA    -7.15903  38.64208  29.54726 7S   104    0.00000
 4198  271 LEU  CB    -7.62071  36.69913  28.58400 7S   104    1.00000
 4199  271 LEU  HB1   -6.74050  36.06261  28.78842 7S   104    0.00000
 4200  271 LEU  HB2   -8.09202  36.43701  27.61030 7S   104    0.00000
 4201  271 LEU  CG    -8.57019  36.28843  29.69277 7S   104    1.00000
 4202  271 LEU  HG    -9.43196  36.70788  29.26390 7S   104    0.00000
 4203  271 LEU  CD1   -9.13049  34.87047  29.75450 7S   104    1.00000
 4204  271 LEU  HD11  -8.27879  34.17925  29.69449 7S   104    0.00000
 4205  271 LEU  HD12  -9.84831  34.70502  28.91775 7S   104    0.00000
 4206  271 LEU  HD13  -9.70799  34.73578  30.69761 7S   104    0.00000
 4207  271 LEU  CD2   -8.21206  36.87802  31.05786 7S   104    1.00000
 4208  271 LEU  HD21  -8.43263  37.96041  31.08948 7S   104    0.00000
 4209  271 LEU  HD22  -7.14034  36.78829  31.26754 7S   104    0.00000
 4210  271 LEU  HD23  -8.76989  36.35543  31.85938 7S   104    0.00000
 4211  271 LEU  C     -5.99660  38.29761  27.85389 7S   104    1.00000
 4212  271 LEU  O     -5.89847  38.77888  26.72718 7S   104    1.00000
 4213  272 SER  N     -4.96535  37.78199  28.53179 7S   105    1.00000
 4214  272 SER  HN    -5.07928  37.40359  29.44821 7S   105    0.00000
 4215  272 SER  CA    -3.63641  37.78515  28.01377 7S   105    1.00000
 4216  272 SER  HA    -3.40517  38.81198  27.79431 7S   105    0.00000
 4217  272 SER  CB    -2.64598  37.27672  29.06721 7S   105    1.00000
 4218  272 SER  HB1   -1.61525  37.33083  28.68361 7S   105    0.00000
 4219  272 SER  HB2   -2.86305  36.21946  29.32468 7S   105    0.00000
 4220  272 SER  OG    -2.74319  38.06411  30.24784 7S   105    1.00000
 4221  272 SER  HG1   -2.52485  38.96491  29.99121 7S   105    0.00000
 4222  272 SER  C     -3.55230  36.91105  26.77610 7S   105    1.00000
 4223  272 SER  O     -3.98381  35.75886  26.84505 7S   105    1.00000
 4224  273 PRO  N     -3.05736  37.38544  25.62895 7S   106    1.00000
 4225  273 PRO  CD    -2.70249  38.78793  25.38194 7S   106    1.00000
 4226  273 PRO  HD1   -1.63988  38.93770  25.65901 7S   106    0.00000
 4227  273 PRO  HD2   -3.34019  39.50709  25.94053 7S   106    0.00000
 4228  273 PRO  CA    -3.07738  36.60918  24.39781 7S   106    1.00000
 4229  273 PRO  HA    -4.06598  36.20217  24.24549 7S   106    0.00000
 4230  273 PRO  CB    -2.64009  37.59484  23.30273 7S   106    1.00000
 4231  273 PRO  HB1   -3.21998  37.43671  22.37147 7S   106    0.00000
 4232  273 PRO  HB2   -1.55176  37.51292  23.08251 7S   106    0.00000
 4233  273 PRO  CG    -2.90373  38.98490  23.88536 7S   106    1.00000
 4234  273 PRO  HG1   -2.22582  39.75260  23.46387 7S   106    0.00000
 4235  273 PRO  HG2   -3.95734  39.28123  23.70318 7S   106    0.00000
 4236  273 PRO  C     -2.10825  35.47266  24.46717 7S   106    1.00000
 4237  273 PRO  O     -1.14120  35.56756  25.20352 7S   106    1.00000
 4238  274 ARG  N     -2.36153  34.38613  23.72643 7S   107    1.00000
 4239  274 ARG  HN    -3.19154  34.32841  23.17828 7S   107    0.00000
 4240  274 ARG  CA    -1.50493  33.23037  23.71863 7S   107    1.00000
 4241  274 ARG  HA    -0.61758  33.40266  24.30811 7S   107    0.00000
 4242  274 ARG  CB    -2.24157  31.99014  24.24649 7S   107    1.00000
 4243  274 ARG  HB1   -1.60377  31.09410  24.12202 7S   107    0.00000
 4244  274 ARG  HB2   -3.17433  31.83933  23.66100 7S   107    0.00000
 4245  274 ARG  CG    -2.59500  32.10578  25.73387 7S   107    1.00000
 4246  274 ARG  HG1   -3.26680  32.97230  25.89039 7S   107    0.00000
 4247  274 ARG  HG2   -1.66577  32.32194  26.29820 7S   107    0.00000
 4248  274 ARG  CD    -3.21361  30.82989  26.30790 7S   107    1.00000
 4249  274 ARG  HD1   -3.37796  30.94013  27.40230 7S   107    0.00000
 4250  274 ARG  HD2   -2.55997  29.95607  26.10248 7S   107    0.00000
 4251  274 ARG  NE    -4.53251  30.58999  25.64708 7S   107    1.00000
 4252  274 ARG  HE    -4.86771  31.24797  24.97450 7S   107    0.00000
 4253  274 ARG  CZ    -5.33476  29.54970  26.00211 7S   107    1.00000
 4254  274 ARG  NH1   -4.94448  28.66293  26.95362 7S   107    1.00000
 4255  274 ARG  HH11  -4.05307  28.77359  27.38900 7S   107    0.00000
 4256  274 ARG  HH12  -5.52541  27.88311  27.17500 7S   107    0.00000
 4257  274 ARG  NH2   -6.53849  29.39781  25.39339 7S   107    1.00000
 4258  274 ARG  HH21  -6.77440  29.97961  24.61783 7S   107    0.00000
 4259  274 ARG  HH22  -7.16297  28.68470  25.70483 7S   107    0.00000
 4260  274 ARG  C     -1.07310  32.98570  22.30751 7S   107    1.00000
 4261  274 ARG  O     -1.87596  33.07102  21.38545 7S   107    1.00000
 4262  275 TRP  N      0.22786  32.68946  22.11026 7S   108    1.00000
 4263  275 TRP  HN     0.86925  32.64629  22.87598 7S   108    0.00000
 4264  275 TRP  CA     0.81833  32.52284  20.80615 7S   108    1.00000
 4265  275 TRP  HA     0.10635  32.79613  20.04404 7S   108    0.00000
 4266  275 TRP  CB     2.08479  33.38002  20.62025 7S   108    1.00000
 4267  275 TRP  HB1    2.56603  33.14863  19.64717 7S   108    0.00000
 4268  275 TRP  HB2    2.80417  33.14442  21.43618 7S   108    0.00000
 4269  275 TRP  CG     1.79539  34.86215  20.67592 7S   108    1.00000
 4270  275 TRP  CD1    1.58392  35.62718  21.78512 7S   108    1.00000
 4271  275 TRP  HD1    1.59290  35.25317  22.79582 7S   108    0.00000
 4272  275 TRP  NE1    1.35861  36.93245  21.43473 7S   108    1.00000
 4273  275 TRP  HE1    1.19684  37.67690  22.04840 7S   108    0.00000
 4274  275 TRP  CE2    1.39902  37.02944  20.06649 7S   108    1.00000
 4275  275 TRP  CD2    1.66262  35.74351  19.54675 7S   108    1.00000
 4276  275 TRP  CE3    1.75058  35.52711  18.17305 7S   108    1.00000
 4277  275 TRP  HE3    1.92419  34.55105  17.75099 7S   108    0.00000
 4278  275 TRP  CZ3    1.57617  36.63126  17.32368 7S   108    1.00000
 4279  275 TRP  HZ3    1.60786  36.48978  16.25376 7S   108    0.00000
 4280  275 TRP  CZ2    1.22624  38.11818  19.22732 7S   108    1.00000
 4281  275 TRP  HZ2    1.00264  39.09791  19.61866 7S   108    0.00000
 4282  275 TRP  CH2    1.31664  37.90963  17.84485 7S   108    1.00000
 4283  275 TRP  HH2    1.14766  38.73970  17.17551 7S   108    0.00000
 4284  275 TRP  C      1.19061  31.08297  20.62919 7S   108    1.00000
 4285  275 TRP  O      2.00336  30.54271  21.37435 7S   108    1.00000
 4286  276 TYR  N      0.59158  30.42560  19.61843 7S   109    1.00000
 4287  276 TYR  HN    -0.06246  30.89024  19.02054 7S   109    0.00000
 4288  276 TYR  CA     0.80429  29.02805  19.34860 7S   109    1.00000
 4289  276 TYR  HA     1.27477  28.56009  20.19824 7S   109    0.00000
 4290  276 TYR  CB    -0.50628  28.29054  19.00749 7S   109    1.00000
 4291  276 TYR  HB1   -0.29247  27.26114  18.65286 7S   109    0.00000
 4292  276 TYR  HB2   -1.05852  28.84133  18.21734 7S   109    0.00000
 4293  276 TYR  CG    -1.39971  28.18435  20.20662 7S   109    1.00000
 4294  276 TYR  CD1   -1.33682  27.05447  21.03951 7S   109    1.00000
 4295  276 TYR  HD1   -0.62118  26.27329  20.83536 7S   109    0.00000
 4296  276 TYR  CE1   -2.19999  26.92820  22.13352 7S   109    1.00000
 4297  276 TYR  HE1   -2.13221  26.06002  22.77295 7S   109    0.00000
 4298  276 TYR  CZ    -3.11838  27.94701  22.41536 7S   109    1.00000
 4299  276 TYR  OH    -3.97322  27.82552  23.52606 7S   109    1.00000
 4300  276 TYR  HH    -3.85846  26.94072  23.87809 7S   109    0.00000
 4301  276 TYR  CD2   -2.33289  29.19540  20.49469 7S   109    1.00000
 4302  276 TYR  HD2   -2.39462  30.06757  19.85997 7S   109    0.00000
 4303  276 TYR  CE2   -3.18457  29.08120  21.59881 7S   109    1.00000
 4304  276 TYR  HE2   -3.89623  29.86331  21.81487 7S   109    0.00000
 4305  276 TYR  C      1.71607  28.89005  18.16329 7S   109    1.00000
 4306  276 TYR  O      1.51796  29.53206  17.13932 7S   109    1.00000
 4307  277 PHE  N      2.73937  28.02074  18.27223 7S   110    1.00000
 4308  277 PHE  HN     2.88528  27.50730  19.11884 7S   110    0.00000
 4309  277 PHE  CA     3.68642  27.77419  17.21474 7S   110    1.00000
 4310  277 PHE  HA     3.76766  28.65710  16.59698 7S   110    0.00000
 4311  277 PHE  CB     5.08483  27.43402  17.78649 7S   110    1.00000
 4312  277 PHE  HB1    5.00867  26.60853  18.52658 7S   110    0.00000
 4313  277 PHE  HB2    5.49326  28.32314  18.30083 7S   110    0.00000
 4314  277 PHE  CG     6.07050  27.04453  16.71974 7S   110    1.00000
 4315  277 PHE  CD1    6.73892  28.01246  15.96143 7S   110    1.00000
 4316  277 PHE  HD1    6.55470  29.05754  16.15334 7S   110    0.00000
 4317  277 PHE  CE1    7.63383  27.62411  14.95725 7S   110    1.00000
 4318  277 PHE  HE1    8.15159  28.37169  14.38228 7S   110    0.00000
 4319  277 PHE  CZ     7.85890  26.26565  14.69893 7S   110    1.00000
 4320  277 PHE  HZ     8.55353  25.96359  13.93084 7S   110    0.00000
 4321  277 PHE  CD2    6.27950  25.68961  16.42915 7S   110    1.00000
 4322  277 PHE  HD2    5.72493  24.94585  16.96619 7S   110    0.00000
 4323  277 PHE  CE2    7.17560  25.29634  15.43721 7S   110    1.00000
 4324  277 PHE  HE2    7.33739  24.24862  15.25014 7S   110    0.00000
 4325  277 PHE  C      3.20882  26.63352  16.35678 7S   110    1.00000
 4326  277 PHE  O      2.87946  25.55743  16.83871 7S   110    1.00000
 4327  278 TYR  N      3.22861  26.83649  15.03188 7S   111    1.00000
 4328  278 TYR  HN     3.46489  27.72877  14.64675 7S   111    0.00000
 4329  278 TYR  CA     2.94993  25.78829  14.09008 7S   111    1.00000
 4330  278 TYR  HA     2.93225  24.82260  14.57633 7S   111    0.00000
 4331  278 TYR  CB     1.63141  26.03338  13.33765 7S   111    1.00000
 4332  278 TYR  HB1    1.45432  25.25005  12.57026 7S   111    0.00000
 4333  278 TYR  HB2    1.67700  27.02547  12.85205 7S   111    0.00000
 4334  278 TYR  CG     0.46146  26.05065  14.27837 7S   111    1.00000
 4335  278 TYR  CD1   -0.24223  24.86599  14.53346 7S   111    1.00000
 4336  278 TYR  HD1    0.06879  23.94244  14.06735 7S   111    0.00000
 4337  278 TYR  CE1   -1.36165  24.87752  15.36782 7S   111    1.00000
 4338  278 TYR  HE1   -1.90803  23.96744  15.52955 7S   111    0.00000
 4339  278 TYR  CZ    -1.76837  26.05987  15.99152 7S   111    1.00000
 4340  278 TYR  OH    -2.86736  26.04973  16.87323 7S   111    1.00000
 4341  278 TYR  HH    -2.91130  26.91409  17.28752 7S   111    0.00000
 4342  278 TYR  CD2    0.03146  27.24548  14.88790 7S   111    1.00000
 4343  278 TYR  HD2    0.56282  28.16759  14.70350 7S   111    0.00000
 4344  278 TYR  CE2   -1.07605  27.24911  15.74261 7S   111    1.00000
 4345  278 TYR  HE2   -1.39441  28.17148  16.20250 7S   111    0.00000
 4346  278 TYR  C      4.07694  25.78431  13.09816 7S   111    1.00000
 4347  278 TYR  O      4.66077  26.82080  12.78947 7S   111    1.00000
 4348  279 TYR  N      4.41553  24.59243  12.56239 7S   112    1.00000
 4349  279 TYR  HN     3.94918  23.74987  12.82814 7S   112    0.00000
 4350  279 TYR  CA     5.46903  24.44565  11.58550 7S   112    1.00000
 4351  279 TYR  HA     6.30213  25.07225  11.87469 7S   112    0.00000
 4352  279 TYR  CB     5.93571  22.97686  11.43677 7S   112    1.00000
 4353  279 TYR  HB1    6.55135  22.83829  10.52287 7S   112    0.00000
 4354  279 TYR  HB2    5.05512  22.30088  11.38400 7S   112    0.00000
 4355  279 TYR  CG     6.78222  22.56702  12.60875 7S   112    1.00000
 4356  279 TYR  CD1    8.16994  22.78302  12.59015 7S   112    1.00000
 4357  279 TYR  HD1    8.62665  23.26072  11.73695 7S   112    0.00000
 4358  279 TYR  CE1    8.96819  22.37081  13.66355 7S   112    1.00000
 4359  279 TYR  HE1   10.03483  22.53627  13.64072 7S   112    0.00000
 4360  279 TYR  CZ     8.38284  21.73214  14.76007 7S   112    1.00000
 4361  279 TYR  OH     9.19226  21.33129  15.83076 7S   112    1.00000
 4362  279 TYR  HH     9.94593  21.92452  15.85799 7S   112    0.00000
 4363  279 TYR  CD2    6.21613  21.93385  13.72616 7S   112    1.00000
 4364  279 TYR  HD2    5.16515  21.74361  13.76578 7S   112    0.00000
 4365  279 TYR  CE2    7.00397  21.51355  14.79811 7S   112    1.00000
 4366  279 TYR  HE2    6.53835  21.03525  15.64889 7S   112    0.00000
 4367  279 TYR  C      4.98796  24.92907  10.24333 7S   112    1.00000
 4368  279 TYR  O      3.79095  25.06321   9.99494 7S   112    1.00000
 4369  280 LEU  N      5.94087  25.22332   9.33460 7S   113    1.00000
 4370  280 LEU  HN     6.90988  25.12887   9.55226 7S   113    0.00000
 4371  280 LEU  CA     5.65289  25.76212   8.03012 7S   113    1.00000
 4372  280 LEU  HA     5.09948  26.67978   8.18068 7S   113    0.00000
 4373  280 LEU  CB     6.96214  26.04664   7.26737 7S   113    1.00000
 4374  280 LEU  HB1    7.51995  25.09227   7.14112 7S   113    0.00000
 4375  280 LEU  HB2    7.58333  26.71975   7.90027 7S   113    0.00000
 4376  280 LEU  CG     6.80724  26.71222   5.88606 7S   113    1.00000
 4377  280 LEU  HG     6.27624  26.00890   5.20319 7S   113    0.00000
 4378  280 LEU  CD1    5.99804  28.01428   5.96797 7S   113    1.00000
 4379  280 LEU  HD11   6.51417  28.72276   6.64958 7S   113    0.00000
 4380  280 LEU  HD12   4.97632  27.82299   6.35509 7S   113    0.00000
 4381  280 LEU  HD13   5.90924  28.47970   4.96497 7S   113    0.00000
 4382  280 LEU  CD2    8.19231  26.98746   5.28787 7S   113    1.00000
 4383  280 LEU  HD21   8.76561  26.04257   5.18530 7S   113    0.00000
 4384  280 LEU  HD22   8.75446  27.67865   5.95037 7S   113    0.00000
 4385  280 LEU  HD23   8.08638  27.45791   4.28962 7S   113    0.00000
 4386  280 LEU  C      4.80996  24.80779   7.22494 7S   113    1.00000
 4387  280 LEU  O      5.09757  23.61459   7.14544 7S   113    1.00000
 4388  281 GLY  N      3.70263  25.32384   6.64987 7S   114    1.00000
 4389  281 GLY  HN     3.48705  26.29751   6.70360 7S   114    0.00000
 4390  281 GLY  CA     2.80398  24.51722   5.86676 7S   114    1.00000
 4391  281 GLY  HA1    3.38727  23.85222   5.24787 7S   114    0.00000
 4392  281 GLY  HA2    2.21692  25.20272   5.28473 7S   114    0.00000
 4393  281 GLY  C      1.86076  23.68320   6.68940 7S   114    1.00000
 4394  281 GLY  O      1.19159  22.81504   6.13584 7S   114    1.00000
 4395  282 THR  N      1.77903  23.90463   8.02468 7S   115    1.00000
 4396  282 THR  HN     2.37363  24.56523   8.48106 7S   115    0.00000
 4397  282 THR  CA     0.86122  23.17204   8.87789 7S   115    1.00000
 4398  282 THR  HA     0.15724  22.62706   8.26612 7S   115    0.00000
 4399  282 THR  CB     1.54772  22.19948   9.82909 7S   115    1.00000
 4400  282 THR  HB     0.78710  21.59815  10.37606 7S   115    0.00000
 4401  282 THR  OG1    2.34973  22.86218  10.79507 7S   115    1.00000
 4402  282 THR  HG1    2.86830  23.51257  10.30630 7S   115    0.00000
 4403  282 THR  CG2    2.44436  21.23932   9.03528 7S   115    1.00000
 4404  282 THR  HG21   3.23555  21.78885   8.48458 7S   115    0.00000
 4405  282 THR  HG22   1.83600  20.65982   8.30894 7S   115    0.00000
 4406  282 THR  HG23   2.94662  20.53455   9.72906 7S   115    0.00000
 4407  282 THR  C      0.05760  24.15888   9.67013 7S   115    1.00000
 4408  282 THR  O      0.34266  25.35004   9.64297 7S   115    1.00000
 4409  283 GLY  N     -0.96308  23.66095  10.40614 7S   116    1.00000
 4410  283 GLY  HN    -1.17760  22.68831  10.38038 7S   116    0.00000
 4411  283 GLY  CA    -1.75753  24.45311  11.31563 7S   116    1.00000
 4412  283 GLY  HA1   -1.10861  25.17161  11.79234 7S   116    0.00000
 4413  283 GLY  HA2   -2.21753  23.76893  12.01235 7S   116    0.00000
 4414  283 GLY  C     -2.85126  25.17920  10.58964 7S   116    1.00000
 4415  283 GLY  O     -3.17552  24.83106   9.45426 7S   116    1.00000
 4416  284 PRO  N     -3.44435  26.20337  11.19879 7S   117    1.00000
 4417  284 PRO  CD    -3.28232  26.53132  12.61997 7S   117    1.00000
 4418  284 PRO  HD1   -2.42741  27.23410  12.72931 7S   117    0.00000
 4419  284 PRO  HD2   -3.12111  25.63373  13.25643 7S   117    0.00000
 4420  284 PRO  CA    -4.52114  26.96146  10.58117 7S   117    1.00000
 4421  284 PRO  HA    -5.27665  26.27101  10.23354 7S   117    0.00000
 4422  284 PRO  CB    -5.02869  27.89438  11.69534 7S   117    1.00000
 4423  284 PRO  HB1   -6.13080  28.00868  11.65768 7S   117    0.00000
 4424  284 PRO  HB2   -4.55030  28.89647  11.63373 7S   117    0.00000
 4425  284 PRO  CG    -4.58777  27.22372  13.00247 7S   117    1.00000
 4426  284 PRO  HG1   -4.45468  27.95437  13.82455 7S   117    0.00000
 4427  284 PRO  HG2   -5.33549  26.45639  13.30031 7S   117    0.00000
 4428  284 PRO  C     -4.03751  27.74492   9.38648 7S   117    1.00000
 4429  284 PRO  O     -4.77266  27.84220   8.40659 7S   117    1.00000
 4430  285 GLU  N     -2.80778  28.29634   9.44087 7S   118    1.00000
 4431  285 GLU  HN    -2.23888  28.22478  10.25953 7S   118    0.00000
 4432  285 GLU  CA    -2.25591  29.06902   8.35565 7S   118    1.00000
 4433  285 GLU  HA    -3.04022  29.34585   7.66658 7S   118    0.00000
 4434  285 GLU  CB    -1.57989  30.35254   8.86903 7S   118    1.00000
 4435  285 GLU  HB1   -1.17644  30.93111   8.01123 7S   118    0.00000
 4436  285 GLU  HB2   -0.72541  30.07945   9.52395 7S   118    0.00000
 4437  285 GLU  CG    -2.52986  31.24519   9.68923 7S   118    1.00000
 4438  285 GLU  HG1   -1.95268  32.09704  10.09953 7S   118    0.00000
 4439  285 GLU  HG2   -2.95385  30.66869  10.53891 7S   118    0.00000
 4440  285 GLU  CD    -3.67437  31.80436   8.84730 7S   118    1.00000
 4441  285 GLU  OE1   -3.50394  31.97653   7.61146 7S   118    1.00000
 4442  285 GLU  OE2   -4.73838  32.11163   9.44929 7S   118    1.00000
 4443  285 GLU  C     -1.25649  28.24512   7.59520 7S   118    1.00000
 4444  285 GLU  O     -0.11647  28.65177   7.37447 7S   118    1.00000
 4445  286 ALA  N     -1.68760  27.05375   7.13339 7S   119    1.00000
 4446  286 ALA  HN    -2.60967  26.72470   7.32970 7S   119    0.00000
 4447  286 ALA  CA    -0.84538  26.15305   6.39029 7S   119    1.00000
 4448  286 ALA  HA     0.11241  26.10018   6.88988 7S   119    0.00000
 4449  286 ALA  CB    -1.46967  24.74877   6.34082 7S   119    1.00000
 4450  286 ALA  HB1   -2.47429  24.77190   5.87224 7S   119    0.00000
 4451  286 ALA  HB2   -1.57411  24.34932   7.37183 7S   119    0.00000
 4452  286 ALA  HB3   -0.82932  24.05228   5.76313 7S   119    0.00000
 4453  286 ALA  C     -0.60165  26.62516   4.97537 7S   119    1.00000
 4454  286 ALA  O      0.36971  26.22223   4.34229 7S   119    1.00000
 4455  287 GLY  N     -1.47015  27.50780   4.43549 7S   120    1.00000
 4456  287 GLY  HN    -2.23945  27.86362   4.96018 7S   120    0.00000
 4457  287 GLY  CA    -1.36127  27.93882   3.05906 7S   120    1.00000
 4458  287 GLY  HA1   -2.35172  28.21235   2.73323 7S   120    0.00000
 4459  287 GLY  HA2   -0.93301  27.13822   2.47168 7S   120    0.00000
 4460  287 GLY  C     -0.48000  29.13667   2.89352 7S   120    1.00000
 4461  287 GLY  O     -0.02569  29.41640   1.78591 7S   120    1.00000
 4462  288 LEU  N     -0.21094  29.88492   3.98568 7S   121    1.00000
 4463  288 LEU  HN    -0.56911  29.65544   4.88704 7S   121    0.00000
 4464  288 LEU  CA     0.59473  31.07489   3.91619 7S   121    1.00000
 4465  288 LEU  HA     0.22539  31.66072   3.09715 7S   121    0.00000
 4466  288 LEU  CB     0.50535  31.90149   5.21293 7S   121    1.00000
 4467  288 LEU  HB1    1.38206  32.58343   5.28755 7S   121    0.00000
 4468  288 LEU  HB2    0.53376  31.20709   6.08191 7S   121    0.00000
 4469  288 LEU  CG    -0.75034  32.78651   5.32677 7S   121    1.00000
 4470  288 LEU  HG    -1.65594  32.13813   5.37235 7S   121    0.00000
 4471  288 LEU  CD1   -0.66705  33.59657   6.62821 7S   121    1.00000
 4472  288 LEU  HD11   0.23547  34.24409   6.61550 7S   121    0.00000
 4473  288 LEU  HD12  -0.60249  32.91754   7.50270 7S   121    0.00000
 4474  288 LEU  HD13  -1.56591  34.23353   6.73510 7S   121    0.00000
 4475  288 LEU  CD2   -0.89847  33.72655   4.11831 7S   121    1.00000
 4476  288 LEU  HD21  -1.16818  33.15232   3.20759 7S   121    0.00000
 4477  288 LEU  HD22   0.06306  34.24881   3.93502 7S   121    0.00000
 4478  288 LEU  HD23  -1.69077  34.47996   4.30226 7S   121    0.00000
 4479  288 LEU  C      2.04873  30.73047   3.68513 7S   121    1.00000
 4480  288 LEU  O      2.59216  29.91270   4.42868 7S   121    1.00000
 4481  289 PRO  N      2.73318  31.31606   2.69578 7S   122    1.00000
 4482  289 PRO  CD     2.14789  32.03913   1.56106 7S   122    1.00000
 4483  289 PRO  HD1    2.06616  33.11649   1.82195 7S   122    0.00000
 4484  289 PRO  HD2    1.15151  31.63902   1.27292 7S   122    0.00000
 4485  289 PRO  CA     4.15798  31.10597   2.52135 7S   122    1.00000
 4486  289 PRO  HA     4.37592  30.04960   2.58259 7S   122    0.00000
 4487  289 PRO  CB     4.48565  31.71713   1.14548 7S   122    1.00000
 4488  289 PRO  HB1    5.18388  31.06953   0.57661 7S   122    0.00000
 4489  289 PRO  HB2    4.92375  32.73537   1.23925 7S   122    0.00000
 4490  289 PRO  CG     3.14006  31.83002   0.42337 7S   122    1.00000
 4491  289 PRO  HG1    3.12576  32.66286  -0.30746 7S   122    0.00000
 4492  289 PRO  HG2    2.91025  30.87124  -0.09180 7S   122    0.00000
 4493  289 PRO  C      4.91456  31.82268   3.60186 7S   122    1.00000
 4494  289 PRO  O      4.34199  32.65650   4.30155 7S   122    1.00000
 4495  290 TYR  N      6.21924  31.52114   3.73641 7S   123    1.00000
 4496  290 TYR  HN     6.64993  30.83193   3.15910 7S   123    0.00000
 4497  290 TYR  CA     7.06332  32.14419   4.72213 7S   123    1.00000
 4498  290 TYR  HA     6.58460  32.01637   5.68352 7S   123    0.00000
 4499  290 TYR  CB     8.46022  31.47915   4.73612 7S   123    1.00000
 4500  290 TYR  HB1    8.96152  31.63870   3.75799 7S   123    0.00000
 4501  290 TYR  HB2    8.34677  30.38610   4.90205 7S   123    0.00000
 4502  290 TYR  CG     9.34451  32.01610   5.82466 7S   123    1.00000
 4503  290 TYR  CD1    9.18341  31.58499   7.14854 7S   123    1.00000
 4504  290 TYR  HD1    8.42654  30.85269   7.38627 7S   123    0.00000
 4505  290 TYR  CE1   10.00918  32.08496   8.15982 7S   123    1.00000
 4506  290 TYR  HE1    9.87038  31.74914   9.17743 7S   123    0.00000
 4507  290 TYR  CZ    10.98472  33.04226   7.85760 7S   123    1.00000
 4508  290 TYR  OH    11.78670  33.57104   8.88699 7S   123    1.00000
 4509  290 TYR  HH    11.44344  33.23566   9.71759 7S   123    0.00000
 4510  290 TYR  CD2   10.33029  32.97270   5.52838 7S   123    1.00000
 4511  290 TYR  HD2   10.44866  33.32415   4.51377 7S   123    0.00000
 4512  290 TYR  CE2   11.14961  33.48418   6.54018 7S   123    1.00000
 4513  290 TYR  HE2   11.90248  34.22124   6.30249 7S   123    0.00000
 4514  290 TYR  C      7.19046  33.62412   4.43427 7S   123    1.00000
 4515  290 TYR  O      7.27360  34.04679   3.28176 7S   123    1.00000
 4516  291 GLY  N      7.17606  34.43925   5.51114 7S   124    1.00000
 4517  291 GLY  HN     7.12441  34.06584   6.43517 7S   124    0.00000
 4518  291 GLY  CA     7.32541  35.87025   5.41190 7S   124    1.00000
 4519  291 GLY  HA1    8.00983  36.09045   4.60526 7S   124    0.00000
 4520  291 GLY  HA2    7.68604  36.20958   6.37084 7S   124    0.00000
 4521  291 GLY  C      6.03819  36.59038   5.12956 7S   124    1.00000
 4522  291 GLY  O      6.03991  37.81607   5.03900 7S   124    1.00000
 4523  292 ALA  N      4.90177  35.86702   4.97889 7S   125    1.00000
 4524  292 ALA  HN     4.89469  34.87378   5.08159 7S   125    0.00000
 4525  292 ALA  CA     3.63923  36.45965   4.60630 7S   125    1.00000
 4526  292 ALA  HA     3.79779  37.05889   3.71972 7S   125    0.00000
 4527  292 ALA  CB     2.58456  35.38562   4.29853 7S   125    1.00000
 4528  292 ALA  HB1    2.42173  34.73644   5.18510 7S   125    0.00000
 4529  292 ALA  HB2    2.93514  34.74297   3.46290 7S   125    0.00000
 4530  292 ALA  HB3    1.61675  35.84515   4.00741 7S   125    0.00000
 4531  292 ALA  C      3.11172  37.34517   5.70643 7S   125    1.00000
 4532  292 ALA  O      2.91225  36.90935   6.83802 7S   125    1.00000
 4533  293 ASN  N      2.88982  38.64024   5.39307 7S   126    1.00000
 4534  293 ASN  HN     3.06055  38.99475   4.47681 7S   126    0.00000
 4535  293 ASN  CA     2.45115  39.60372   6.37126 7S   126    1.00000
 4536  293 ASN  HA     3.02141  39.44796   7.27840 7S   126    0.00000
 4537  293 ASN  CB     2.67576  41.05309   5.87157 7S   126    1.00000
 4538  293 ASN  HB1    2.12618  41.19788   4.91668 7S   126    0.00000
 4539  293 ASN  HB2    3.75956  41.20112   5.67680 7S   126    0.00000
 4540  293 ASN  CG     2.22613  42.10129   6.90158 7S   126    1.00000
 4541  293 ASN  OD1    2.17841  41.84930   8.11000 7S   126    1.00000
 4542  293 ASN  ND2    1.87214  43.31111   6.38573 7S   126    1.00000
 4543  293 ASN  HD21   1.54728  44.02482   7.00364 7S   126    0.00000
 4544  293 ASN  HD22   1.93395  43.46644   5.40095 7S   126    0.00000
 4545  293 ASN  C      0.98714  39.38380   6.66214 7S   126    1.00000
 4546  293 ASN  O      0.15982  39.34102   5.75258 7S   126    1.00000
 4547  294 LYS  N      0.65729  39.25092   7.96304 7S   127    1.00000
 4548  294 LYS  HN     1.34307  39.27115   8.68873 7S   127    0.00000
 4549  294 LYS  CA    -0.70488  39.10780   8.37783 7S   127    1.00000
 4550  294 LYS  HA    -1.30660  39.85560   7.88052 7S   127    0.00000
 4551  294 LYS  CB    -1.22486  37.68824   8.09276 7S   127    1.00000
 4552  294 LYS  HB1   -0.59370  36.94137   8.62197 7S   127    0.00000
 4553  294 LYS  HB2   -1.12078  37.49800   7.00039 7S   127    0.00000
 4554  294 LYS  CG    -2.68805  37.47070   8.46410 7S   127    1.00000
 4555  294 LYS  HG1   -3.31438  38.22673   7.93887 7S   127    0.00000
 4556  294 LYS  HG2   -2.82351  37.60634   9.55931 7S   127    0.00000
 4557  294 LYS  CD    -3.15012  36.06828   8.08103 7S   127    1.00000
 4558  294 LYS  HD1   -2.53627  35.32385   8.63655 7S   127    0.00000
 4559  294 LYS  HD2   -2.96592  35.92722   6.99174 7S   127    0.00000
 4560  294 LYS  CE    -4.62829  35.86737   8.39362 7S   127    1.00000
 4561  294 LYS  HE1   -5.22453  36.66715   7.90385 7S   127    0.00000
 4562  294 LYS  HE2   -4.79381  35.89686   9.49142 7S   127    0.00000
 4563  294 LYS  NZ    -5.10509  34.56798   7.88313 7S   127    1.00000
 4564  294 LYS  HZ1   -4.68943  33.78789   8.44115 7S   127    0.00000
 4565  294 LYS  HZ2   -4.82279  34.45140   6.88935 7S   127    0.00000
 4566  294 LYS  HZ3   -6.13973  34.52239   7.96067 7S   127    0.00000
 4567  294 LYS  C     -0.74523  39.36342   9.84884 7S   127    1.00000
 4568  294 LYS  O      0.17016  38.97647  10.56846 7S   127    1.00000
 4569  295 ASP  N     -1.82372  40.01965  10.33728 7S   128    1.00000
 4570  295 ASP  HN    -2.56367  40.31928   9.73962 7S   128    0.00000
 4571  295 ASP  CA    -1.99928  40.34383  11.73085 7S   128    1.00000
 4572  295 ASP  HA    -1.10987  40.86157  12.05892 7S   128    0.00000
 4573  295 ASP  CB    -3.21396  41.28136  11.90727 7S   128    1.00000
 4574  295 ASP  HB1   -4.13210  40.75159  11.57035 7S   128    0.00000
 4575  295 ASP  HB2   -3.07861  42.18963  11.28397 7S   128    0.00000
 4576  295 ASP  CG    -3.41534  41.72898  13.34675 7S   128    1.00000
 4577  295 ASP  OD1   -2.56239  42.47126  13.89883 7S   128    1.00000
 4578  295 ASP  OD2   -4.45752  41.30581  13.90782 7S   128    1.00000
 4579  295 ASP  C     -2.16423  39.07628  12.54837 7S   128    1.00000
 4580  295 ASP  O     -2.84127  38.13227  12.14292 7S   128    1.00000
 4581  296 GLY  N     -1.48809  39.03292  13.71844 7S   129    1.00000
 4582  296 GLY  HN    -0.96499  39.82346  14.03323 7S   129    0.00000
 4583  296 GLY  CA    -1.48340  37.88560  14.59003 7S   129    1.00000
 4584  296 GLY  HA1   -2.49515  37.50966  14.65031 7S   129    0.00000
 4585  296 GLY  HA2   -1.10169  38.21482  15.54440 7S   129    0.00000
 4586  296 GLY  C     -0.60101  36.76955  14.10785 7S   129    1.00000
 4587  296 GLY  O     -0.73296  35.65703  14.60354 7S   129    1.00000
 4588  297 ILE  N      0.30491  37.01963  13.13181 7S   130    1.00000
 4589  297 ILE  HN     0.39475  37.92804  12.73119 7S   130    0.00000
 4590  297 ILE  CA     1.16599  36.00248  12.56779 7S   130    1.00000
 4591  297 ILE  HA     1.20527  35.15563  13.23277 7S   130    0.00000
 4592  297 ILE  CB     0.72012  35.54298  11.17555 7S   130    1.00000
 4593  297 ILE  HB     0.60598  36.43532  10.51882 7S   130    0.00000
 4594  297 ILE  CG2    1.76578  34.60646  10.53181 7S   130    1.00000
 4595  297 ILE  HG21   2.03680  33.79282  11.23668 7S   130    0.00000
 4596  297 ILE  HG22   2.68392  35.16328  10.25603 7S   130    0.00000
 4597  297 ILE  HG23   1.34315  34.15047   9.61074 7S   130    0.00000
 4598  297 ILE  CG1   -0.65527  34.83752  11.23131 7S   130    1.00000
 4599  297 ILE  HG11  -0.98163  34.61737  10.19108 7S   130    0.00000
 4600  297 ILE  HG12  -1.40461  35.52383  11.68104 7S   130    0.00000
 4601  297 ILE  CD    -0.63369  33.52578  12.01799 7S   130    1.00000
 4602  297 ILE  HD1   -0.31667  33.70468  13.06242 7S   130    0.00000
 4603  297 ILE  HD2    0.06923  32.79800  11.56279 7S   130    0.00000
 4604  297 ILE  HD3   -1.64511  33.07208  12.03798 7S   130    0.00000
 4605  297 ILE  C      2.55165  36.58088  12.50532 7S   130    1.00000
 4606  297 ILE  O      2.77042  37.62149  11.88742 7S   130    1.00000
 4607  298 ILE  N      3.53014  35.90456  13.15372 7S   131    1.00000
 4608  298 ILE  HN     3.32434  35.10968  13.72391 7S   131    0.00000
 4609  298 ILE  CA     4.93145  36.24175  13.02388 7S   131    1.00000
 4610  298 ILE  HA     5.05914  36.97271  12.23910 7S   131    0.00000
 4611  298 ILE  CB     5.55290  36.77006  14.30663 7S   131    1.00000
 4612  298 ILE  HB     6.63586  36.97267  14.13542 7S   131    0.00000
 4613  298 ILE  CG2    4.87213  38.09462  14.70055 7S   131    1.00000
 4614  298 ILE  HG21   3.83263  37.90266  15.04349 7S   131    0.00000
 4615  298 ILE  HG22   4.84687  38.79481  13.84133 7S   131    0.00000
 4616  298 ILE  HG23   5.42713  38.57200  15.53529 7S   131    0.00000
 4617  298 ILE  CG1    5.42019  35.75184  15.44633 7S   131    1.00000
 4618  298 ILE  HG11   5.73291  34.74760  15.09323 7S   131    0.00000
 4619  298 ILE  HG12   4.35332  35.69231  15.76405 7S   131    0.00000
 4620  298 ILE  CD     6.27980  36.09427  16.65071 7S   131    1.00000
 4621  298 ILE  HD1    5.76091  36.86266  17.25118 7S   131    0.00000
 4622  298 ILE  HD2    7.26896  36.48317  16.32782 7S   131    0.00000
 4623  298 ILE  HD3    6.42800  35.19858  17.28827 7S   131    0.00000
 4624  298 ILE  C      5.66097  35.00115  12.57750 7S   131    1.00000
 4625  298 ILE  O      5.16139  33.89195  12.73511 7S   131    1.00000
 4626  299 TRP  N      6.86891  35.16980  11.99660 7S   132    1.00000
 4627  299 TRP  HN     7.27697  36.07444  11.90937 7S   132    0.00000
 4628  299 TRP  CA     7.61045  34.08824  11.38927 7S   132    1.00000
 4629  299 TRP  HA     7.08233  33.15208  11.50828 7S   132    0.00000
 4630  299 TRP  CB     7.84786  34.33565   9.88755 7S   132    1.00000
 4631  299 TRP  HB1    8.48461  33.53657   9.47108 7S   132    0.00000
 4632  299 TRP  HB2    8.36576  35.31092   9.74892 7S   132    0.00000
 4633  299 TRP  CG     6.56710  34.36781   9.09554 7S   132    1.00000
 4634  299 TRP  CD1    5.82886  35.46692   8.77312 7S   132    1.00000
 4635  299 TRP  HD1    6.09571  36.48264   9.02553 7S   132    0.00000
 4636  299 TRP  NE1    4.70443  35.09553   8.08689 7S   132    1.00000
 4637  299 TRP  HE1    4.03163  35.70537   7.71933 7S   132    0.00000
 4638  299 TRP  CE2    4.69684  33.73162   7.94539 7S   132    1.00000
 4639  299 TRP  CD2    5.85559  33.22926   8.57169 7S   132    1.00000
 4640  299 TRP  CE3    6.11866  31.86176   8.59961 7S   132    1.00000
 4641  299 TRP  HE3    6.98245  31.44767   9.09484 7S   132    0.00000
 4642  299 TRP  CZ3    5.19440  31.00489   7.97976 7S   132    1.00000
 4643  299 TRP  HZ3    5.35452  29.93901   8.00798 7S   132    0.00000
 4644  299 TRP  CZ2    3.78567  32.88442   7.33325 7S   132    1.00000
 4645  299 TRP  HZ2    2.90252  33.26222   6.84402 7S   132    0.00000
 4646  299 TRP  CH2    4.04507  31.50909   7.35470 7S   132    1.00000
 4647  299 TRP  HH2    3.34823  30.83302   6.88111 7S   132    0.00000
 4648  299 TRP  C      8.94814  33.95392  12.05398 7S   132    1.00000
 4649  299 TRP  O      9.62997  34.94359  12.31466 7S   132    1.00000
 4650  300 VAL  N      9.34915  32.69581  12.34059 7S   133    1.00000
 4651  300 VAL  HN     8.76013  31.90930  12.14978 7S   133    0.00000
 4652  300 VAL  CA    10.62469  32.38031  12.93891 7S   133    1.00000
 4653  300 VAL  HA    11.27679  33.23888  12.86508 7S   133    0.00000
 4654  300 VAL  CB    10.51984  31.94578  14.39348 7S   133    1.00000
 4655  300 VAL  HB    11.51935  31.62358  14.76760 7S   133    0.00000
 4656  300 VAL  CG1   10.05478  33.14607  15.23739 7S   133    1.00000
 4657  300 VAL  HG11   9.06149  33.50753  14.90197 7S   133    0.00000
 4658  300 VAL  HG12  10.78755  33.97678  15.16472 7S   133    0.00000
 4659  300 VAL  HG13   9.95670  32.84351  16.29914 7S   133    0.00000
 4660  300 VAL  CG2    9.54140  30.76857  14.54108 7S   133    1.00000
 4661  300 VAL  HG21   9.88990  29.89140  13.96110 7S   133    0.00000
 4662  300 VAL  HG22   8.52709  31.05251  14.19075 7S   133    0.00000
 4663  300 VAL  HG23   9.47364  30.46906  15.60606 7S   133    0.00000
 4664  300 VAL  C     11.25343  31.28459  12.12557 7S   133    1.00000
 4665  300 VAL  O     10.56589  30.47692  11.50407 7S   133    1.00000
 4666  301 ALA  N     12.60144  31.24899  12.09281 7S   134    1.00000
 4667  301 ALA  HN    13.16468  31.88786  12.60975 7S   134    0.00000
 4668  301 ALA  CA    13.29409  30.29402  11.27350 7S   134    1.00000
 4669  301 ALA  HA    12.87761  29.31487  11.45337 7S   134    0.00000
 4670  301 ALA  CB    13.22128  30.64175   9.77502 7S   134    1.00000
 4671  301 ALA  HB1   13.78504  31.56884   9.54401 7S   134    0.00000
 4672  301 ALA  HB2   12.16461  30.82445   9.49471 7S   134    0.00000
 4673  301 ALA  HB3   13.60667  29.80829   9.15111 7S   134    0.00000
 4674  301 ALA  C     14.73308  30.27553  11.67367 7S   134    1.00000
 4675  301 ALA  O     15.40326  31.30396  11.65327 7S   134    1.00000
 4676  302 THR  N     15.24901  29.08249  12.03051 7S   135    1.00000
 4677  302 THR  HN    14.67231  28.26821  12.10671 7S   135    0.00000
 4678  302 THR  CA    16.64332  28.85899  12.32210 7S   135    1.00000
 4679  302 THR  HA    17.01377  29.70045  12.88808 7S   135    0.00000
 4680  302 THR  CB    16.86922  27.57691  13.10716 7S   135    1.00000
 4681  302 THR  HB    16.75730  26.68960  12.44419 7S   135    0.00000
 4682  302 THR  OG1   15.91682  27.48575  14.15940 7S   135    1.00000
 4683  302 THR  HG1   16.06456  26.63626  14.58201 7S   135    0.00000
 4684  302 THR  CG2   18.26760  27.56260  13.74192 7S   135    1.00000
 4685  302 THR  HG21  18.38095  28.42929  14.42784 7S   135    0.00000
 4686  302 THR  HG22  19.05471  27.61196  12.96301 7S   135    0.00000
 4687  302 THR  HG23  18.41380  26.62536  14.31996 7S   135    0.00000
 4688  302 THR  C     17.37884  28.77500  11.01164 7S   135    1.00000
 4689  302 THR  O     16.84407  28.28222  10.01839 7S   135    1.00000
 4690  303 GLU  N     18.64050  29.26280  10.97534 7S   136    1.00000
 4691  303 GLU  HN    19.06001  29.68621  11.77463 7S   136    0.00000
 4692  303 GLU  CA    19.46246  29.20654   9.79093 7S   136    1.00000
 4693  303 GLU  HA    18.90694  29.68640   8.99644 7S   136    0.00000
 4694  303 GLU  CB    20.80910  29.94495   9.98381 7S   136    1.00000
 4695  303 GLU  HB1   21.48185  29.33314  10.62456 7S   136    0.00000
 4696  303 GLU  HB2   20.60381  30.89646  10.52451 7S   136    0.00000
 4697  303 GLU  CG    21.50881  30.27914   8.65211 7S   136    1.00000
 4698  303 GLU  HG1   20.80490  30.84800   8.00725 7S   136    0.00000
 4699  303 GLU  HG2   21.79240  29.34094   8.13142 7S   136    0.00000
 4700  303 GLU  CD    22.76719  31.11800   8.87179 7S   136    1.00000
 4701  303 GLU  OE1   23.78034  30.55194   9.36042 7S   136    1.00000
 4702  303 GLU  OE2   22.73242  32.33232   8.53700 7S   136    1.00000
 4703  303 GLU  C     19.72269  27.76623   9.40724 7S   136    1.00000
 4704  303 GLU  O     19.92090  26.90939  10.26824 7S   136    1.00000
 4705  304 GLY  N     19.66493  27.46959   8.08991 7S   137    1.00000
 4706  304 GLY  HN    19.51181  28.18406   7.41105 7S   137    0.00000
 4707  304 GLY  CA    19.87588  26.13313   7.58114 7S   137    1.00000
 4708  304 GLY  HA1   20.44931  25.56236   8.29715 7S   137    0.00000
 4709  304 GLY  HA2   20.38322  26.24313   6.63494 7S   137    0.00000
 4710  304 GLY  C     18.59125  25.39717   7.32373 7S   137    1.00000
 4711  304 GLY  O     18.60645  24.33980   6.69632 7S   137    1.00000
 4712  305 ALA  N     17.43907  25.92840   7.79636 7S   138    1.00000
 4713  305 ALA  HN    17.42917  26.77290   8.32688 7S   138    0.00000
 4714  305 ALA  CA    16.15382  25.30312   7.60593 7S   138    1.00000
 4715  305 ALA  HA    16.26690  24.24567   7.77832 7S   138    0.00000
 4716  305 ALA  CB    15.10745  25.84901   8.58626 7S   138    1.00000
 4717  305 ALA  HB1   14.98490  26.94473   8.44813 7S   138    0.00000
 4718  305 ALA  HB2   15.44361  25.66697   9.62964 7S   138    0.00000
 4719  305 ALA  HB3   14.12600  25.35170   8.44407 7S   138    0.00000
 4720  305 ALA  C     15.65796  25.50641   6.19851 7S   138    1.00000
 4721  305 ALA  O     16.06385  26.44145   5.50943 7S   138    1.00000
 4722  306 LEU  N     14.77558  24.59498   5.73191 7S   139    1.00000
 4723  306 LEU  HN    14.44240  23.84762   6.30367 7S   139    0.00000
 4724  306 LEU  CA    14.31476  24.59309   4.36541 7S   139    1.00000
 4725  306 LEU  HA    14.96481  25.20960   3.75992 7S   139    0.00000
 4726  306 LEU  CB    14.27301  23.17236   3.76104 7S   139    1.00000
 4727  306 LEU  HB1   13.89532  23.23582   2.71680 7S   139    0.00000
 4728  306 LEU  HB2   13.56638  22.54609   4.35003 7S   139    0.00000
 4729  306 LEU  CG    15.63592  22.44124   3.71855 7S   139    1.00000
 4730  306 LEU  HG    15.93308  22.19330   4.76109 7S   139    0.00000
 4731  306 LEU  CD1   15.50248  21.12823   2.92627 7S   139    1.00000
 4732  306 LEU  HD11  15.19793  21.35095   1.88132 7S   139    0.00000
 4733  306 LEU  HD12  14.73666  20.46945   3.38687 7S   139    0.00000
 4734  306 LEU  HD13  16.47194  20.58688   2.90498 7S   139    0.00000
 4735  306 LEU  CD2   16.77518  23.30172   3.15187 7S   139    1.00000
 4736  306 LEU  HD21  16.93588  24.19926   3.78497 7S   139    0.00000
 4737  306 LEU  HD22  16.53030  23.61987   2.11780 7S   139    0.00000
 4738  306 LEU  HD23  17.72024  22.71807   3.14319 7S   139    0.00000
 4739  306 LEU  C     12.93608  25.18534   4.29426 7S   139    1.00000
 4740  306 LEU  O     12.10860  24.98483   5.18183 7S   139    1.00000
 4741  307 ASN  N     12.66520  25.94018   3.20305 7S   140    1.00000
 4742  307 ASN  HN    13.35578  26.08181   2.49741 7S   140    0.00000
 4743  307 ASN  CA    11.41516  26.63383   2.99006 7S   140    1.00000
 4744  307 ASN  HA    10.96954  26.85049   3.95137 7S   140    0.00000
 4745  307 ASN  CB    11.66149  27.96127   2.22807 7S   140    1.00000
 4746  307 ASN  HB1   11.98099  27.75328   1.18522 7S   140    0.00000
 4747  307 ASN  HB2   12.49208  28.49761   2.73862 7S   140    0.00000
 4748  307 ASN  CG    10.42495  28.87282   2.21541 7S   140    1.00000
 4749  307 ASN  OD1    9.27759  28.44528   2.37153 7S   140    1.00000
 4750  307 ASN  ND2   10.68304  30.19542   2.01429 7S   140    1.00000
 4751  307 ASN  HD21   9.91778  30.83568   1.98232 7S   140    0.00000
 4752  307 ASN  HD22  11.62524  30.50616   1.90145 7S   140    0.00000
 4753  307 ASN  C     10.48350  25.72946   2.21845 7S   140    1.00000
 4754  307 ASN  O     10.18287  25.95781   1.04663 7S   140    1.00000
 4755  308 THR  N     10.00839  24.66181   2.88638 7S   141    1.00000
 4756  308 THR  HN    10.27340  24.49091   3.83289 7S   141    0.00000
 4757  308 THR  CA     9.16945  23.66484   2.26847 7S   141    1.00000
 4758  308 THR  HA     8.71833  24.09560   1.38855 7S   141    0.00000
 4759  308 THR  CB     9.93418  22.39249   1.91068 7S   141    1.00000
 4760  308 THR  HB     9.22681  21.57570   1.63869 7S   141    0.00000
 4761  308 THR  OG1   10.75706  21.95930   2.99289 7S   141    1.00000
 4762  308 THR  HG1   11.29563  21.24687   2.64117 7S   141    0.00000
 4763  308 THR  CG2   10.82835  22.66840   0.68723 7S   141    1.00000
 4764  308 THR  HG21  11.56850  23.46536   0.90868 7S   141    0.00000
 4765  308 THR  HG22  10.20809  22.99150  -0.17589 7S   141    0.00000
 4766  308 THR  HG23  11.37806  21.74762   0.39974 7S   141    0.00000
 4767  308 THR  C      8.07095  23.31711   3.23791 7S   141    1.00000
 4768  308 THR  O      8.28725  23.43450   4.44337 7S   141    1.00000
 4769  309 PRO  N      6.89705  22.86312   2.78728 7S   142    1.00000
 4770  309 PRO  CD     6.46049  22.90150   1.38680 7S   142    1.00000
 4771  309 PRO  HD1    7.26062  22.57113   0.68984 7S   142    0.00000
 4772  309 PRO  HD2    6.13727  23.93560   1.13070 7S   142    0.00000
 4773  309 PRO  CA     5.85439  22.35565   3.66847 7S   142    1.00000
 4774  309 PRO  HA     5.62969  23.10474   4.41561 7S   142    0.00000
 4775  309 PRO  CB     4.66930  22.04745   2.73898 7S   142    1.00000
 4776  309 PRO  HB1    3.95114  22.89547   2.76488 7S   142    0.00000
 4777  309 PRO  HB2    4.13517  21.11331   3.01071 7S   142    0.00000
 4778  309 PRO  CG     5.27427  21.94509   1.33408 7S   142    1.00000
 4779  309 PRO  HG1    5.64906  20.91125   1.16781 7S   142    0.00000
 4780  309 PRO  HG2    4.54507  22.21450   0.54490 7S   142    0.00000
 4781  309 PRO  C      6.30170  21.10030   4.38041 7S   142    1.00000
 4782  309 PRO  O      7.07074  20.31772   3.82064 7S   142    1.00000
 4783  310 LYS  N      5.85097  20.93366   5.64360 7S   143    1.00000
 4784  310 LYS  HN     5.20052  21.57678   6.04287 7S   143    0.00000
 4785  310 LYS  CA     6.38760  19.93966   6.54091 7S   143    1.00000
 4786  310 LYS  HA     7.01796  19.25205   5.99407 7S   143    0.00000
 4787  310 LYS  CB     7.21636  20.57285   7.67111 7S   143    1.00000
 4788  310 LYS  HB1    7.65196  19.78268   8.32223 7S   143    0.00000
 4789  310 LYS  HB2    6.58687  21.24977   8.29043 7S   143    0.00000
 4790  310 LYS  CG     8.34986  21.38784   7.06989 7S   143    1.00000
 4791  310 LYS  HG1    7.92361  22.21444   6.46053 7S   143    0.00000
 4792  310 LYS  HG2    8.93823  20.72582   6.39475 7S   143    0.00000
 4793  310 LYS  CD     9.26832  22.02786   8.09256 7S   143    1.00000
 4794  310 LYS  HD1    9.75071  21.23237   8.70285 7S   143    0.00000
 4795  310 LYS  HD2    8.67599  22.67420   8.77879 7S   143    0.00000
 4796  310 LYS  CE    10.30727  22.87673   7.36516 7S   143    1.00000
 4797  310 LYS  HE1   11.01721  23.30461   8.09893 7S   143    0.00000
 4798  310 LYS  HE2    9.82811  23.70048   6.80009 7S   143    0.00000
 4799  310 LYS  NZ    11.07904  22.05242   6.40542 7S   143    1.00000
 4800  310 LYS  HZ1   10.73210  22.19370   5.43618 7S   143    0.00000
 4801  310 LYS  HZ2   11.01006  21.04739   6.66831 7S   143    0.00000
 4802  310 LYS  HZ3   12.08410  22.33043   6.46624 7S   143    0.00000
 4803  310 LYS  C      5.26260  19.15805   7.12473 7S   143    1.00000
 4804  310 LYS  O      4.98307  19.21021   8.32233 7S   143    1.00000
 4805  311 ASP  N      4.60087  18.36841   6.26004 7S   144    1.00000
 4806  311 ASP  HN     4.82403  18.36833   5.28713 7S   144    0.00000
 4807  311 ASP  CA     3.47987  17.54759   6.63930 7S   144    1.00000
 4808  311 ASP  HA     2.84487  18.11938   7.30225 7S   144    0.00000
 4809  311 ASP  CB     2.68025  17.10280   5.39964 7S   144    1.00000
 4810  311 ASP  HB1    1.87668  16.39281   5.68715 7S   144    0.00000
 4811  311 ASP  HB2    3.36744  16.60618   4.68609 7S   144    0.00000
 4812  311 ASP  CG     2.03957  18.31823   4.73090 7S   144    1.00000
 4813  311 ASP  OD1    1.22637  19.00140   5.40702 7S   144    1.00000
 4814  311 ASP  OD2    2.35312  18.57829   3.54045 7S   144    1.00000
 4815  311 ASP  C      3.90046  16.31301   7.39741 7S   144    1.00000
 4816  311 ASP  O      3.07244  15.68172   8.05064 7S   144    1.00000
 4817  312 HSE  N      5.20246  15.94369   7.37717 7S   145    1.00000
 4818  312 HSE  HN     5.88815  16.42550   6.83203 7S   145    0.00000
 4819  312 HSE  CA     5.69404  14.82774   8.15235 7S   145    1.00000
 4820  312 HSE  HA     5.01294  14.00286   7.99800 7S   145    0.00000
 4821  312 HSE  CB     7.10423  14.37824   7.71030 7S   145    1.00000
 4822  312 HSE  HB1    7.02971  13.96509   6.67981 7S   145    0.00000
 4823  312 HSE  HB2    7.44623  13.55313   8.37310 7S   145    0.00000
 4824  312 HSE  ND1    8.20626  16.37855   6.67683 7S   145    1.00000
 4825  312 HSE  CG     8.15504  15.45676   7.70939 7S   145    1.00000
 4826  312 HSE  CE1    9.22848  17.15449   6.96674 7S   145    1.00000
 4827  312 HSE  HE1    9.58214  17.99673   6.37412 7S   145    0.00000
 4828  312 HSE  NE2    9.83158  16.79360   8.12175 7S   145    1.00000
 4829  312 HSE  HE2   10.60571  17.28478   8.52009 7S   145    0.00000
 4830  312 HSE  CD2    9.15052  15.69657   8.60582 7S   145    1.00000
 4831  312 HSE  HD2    9.39451  15.16242   9.51334 7S   145    0.00000
 4832  312 HSE  C      5.70523  15.10478   9.63862 7S   145    1.00000
 4833  312 HSE  O      5.74982  14.17091  10.43713 7S   145    1.00000
 4834  313 ILE  N      5.63816  16.39254  10.04285 7S   146    1.00000
 4835  313 ILE  HN     5.66323  17.14134   9.38351 7S   146    0.00000
 4836  313 ILE  CA     5.49974  16.77484  11.42869 7S   146    1.00000
 4837  313 ILE  HA     5.76161  15.93863  12.06135 7S   146    0.00000
 4838  313 ILE  CB     6.39554  17.94901  11.77830 7S   146    1.00000
 4839  313 ILE  HB     6.13029  18.82999  11.15045 7S   146    0.00000
 4840  313 ILE  CG2    6.22200  18.31570  13.26475 7S   146    1.00000
 4841  313 ILE  HG21   6.48947  17.44642  13.90236 7S   146    0.00000
 4842  313 ILE  HG22   5.18240  18.62823  13.48534 7S   146    0.00000
 4843  313 ILE  HG23   6.88725  19.16073  13.52890 7S   146    0.00000
 4844  313 ILE  CG1    7.86638  17.57499  11.48694 7S   146    1.00000
 4845  313 ILE  HG11   7.97933  17.32438  10.41055 7S   146    0.00000
 4846  313 ILE  HG12   8.13159  16.67328  12.08351 7S   146    0.00000
 4847  313 ILE  CD     8.84072  18.70195  11.82528 7S   146    1.00000
 4848  313 ILE  HD1    8.90670  18.84915  12.92444 7S   146    0.00000
 4849  313 ILE  HD2    8.50036  19.65273  11.36064 7S   146    0.00000
 4850  313 ILE  HD3    9.85320  18.45521  11.45017 7S   146    0.00000
 4851  313 ILE  C      4.05075  17.07389  11.70687 7S   146    1.00000
 4852  313 ILE  O      3.50088  16.57899  12.69008 7S   146    1.00000
 4853  314 GLY  N      3.39014  17.88616  10.84441 7S   147    1.00000
 4854  314 GLY  HN     3.86089  18.30223  10.06933 7S   147    0.00000
 4855  314 GLY  CA     1.96286  18.13271  10.91501 7S   147    1.00000
 4856  314 GLY  HA1    1.44983  17.18779  10.82217 7S   147    0.00000
 4857  314 GLY  HA2    1.71856  18.82389  10.12538 7S   147    0.00000
 4858  314 GLY  C      1.56200  18.77584  12.20123 7S   147    1.00000
 4859  314 GLY  O      2.35777  19.46201  12.82691 7S   147    1.00000
 4860  315 THR  N      0.30566  18.54658  12.61720 7S   148    1.00000
 4861  315 THR  HN    -0.31146  17.99177  12.06807 7S   148    0.00000
 4862  315 THR  CA    -0.27401  19.07704  13.82808 7S   148    1.00000
 4863  315 THR  HA     0.39254  19.81112  14.26434 7S   148    0.00000
 4864  315 THR  CB    -1.61630  19.72567  13.54469 7S   148    1.00000
 4865  315 THR  HB    -2.16911  19.94056  14.48199 7S   148    0.00000
 4866  315 THR  OG1   -2.43577  18.89695  12.73018 7S   148    1.00000
 4867  315 THR  HG1   -2.06842  18.96788  11.84525 7S   148    0.00000
 4868  315 THR  CG2   -1.38278  21.05603  12.80783 7S   148    1.00000
 4869  315 THR  HG21  -0.85281  20.88600  11.84711 7S   148    0.00000
 4870  315 THR  HG22  -0.77133  21.74343  13.42971 7S   148    0.00000
 4871  315 THR  HG23  -2.35615  21.54393  12.59060 7S   148    0.00000
 4872  315 THR  C     -0.41523  17.96192  14.83747 7S   148    1.00000
 4873  315 THR  O     -0.01811  16.82514  14.58911 7S   148    1.00000
 4874  316 ARG  N     -0.95754  18.28912  16.03109 7S   149    1.00000
 4875  316 ARG  HN    -1.33305  19.19876  16.19756 7S   149    0.00000
 4876  316 ARG  CA    -0.93908  17.40622  17.16759 7S   149    1.00000
 4877  316 ARG  HA    -0.42631  16.48708  16.92433 7S   149    0.00000
 4878  316 ARG  CB    -0.22425  18.08100  18.34977 7S   149    1.00000
 4879  316 ARG  HB1   -0.86442  18.91303  18.71479 7S   149    0.00000
 4880  316 ARG  HB2    0.71496  18.54389  17.97533 7S   149    0.00000
 4881  316 ARG  CG     0.15956  17.13679  19.50027 7S   149    1.00000
 4882  316 ARG  HG1    1.24895  17.20330  19.69325 7S   149    0.00000
 4883  316 ARG  HG2   -0.05818  16.08380  19.21291 7S   149    0.00000
 4884  316 ARG  CD    -0.56495  17.44855  20.80161 7S   149    1.00000
 4885  316 ARG  HD1   -0.14959  16.85861  21.63664 7S   149    0.00000
 4886  316 ARG  HD2   -1.63880  17.24097  20.69166 7S   149    0.00000
 4887  316 ARG  NE    -0.43054  18.89518  21.10715 7S   149    1.00000
 4888  316 ARG  HE    -0.03335  19.50526  20.41841 7S   149    0.00000
 4889  316 ARG  CZ    -1.00236  19.44953  22.20595 7S   149    1.00000
 4890  316 ARG  NH1   -1.61058  18.67189  23.13701 7S   149    1.00000
 4891  316 ARG  HH11  -1.67857  17.68639  22.98304 7S   149    0.00000
 4892  316 ARG  HH12  -2.00151  19.08784  23.95442 7S   149    0.00000
 4893  316 ARG  NH2   -0.93677  20.79362  22.38018 7S   149    1.00000
 4894  316 ARG  HH21  -0.45584  21.34699  21.69933 7S   149    0.00000
 4895  316 ARG  HH22  -1.29135  21.19830  23.22247 7S   149    0.00000
 4896  316 ARG  C     -2.34290  17.08170  17.58578 7S   149    1.00000
 4897  316 ARG  O     -3.27169  17.86019  17.37045 7S   149    1.00000
 4898  317 ASN  N     -2.51112  15.90336  18.22336 7S   150    1.00000
 4899  317 ASN  HN    -1.75360  15.26394  18.33057 7S   150    0.00000
 4900  317 ASN  CA    -3.75512  15.48641  18.80279 7S   150    1.00000
 4901  317 ASN  HA    -4.54035  15.89306  18.20019 7S   150    0.00000
 4902  317 ASN  CB    -3.84206  13.95408  18.80741 7S   150    1.00000
 4903  317 ASN  HB1   -3.93227  13.58959  19.83776 7S   150    0.00000
 4904  317 ASN  HB2   -2.89965  13.52742  18.41951 7S   150    0.00000
 4905  317 ASN  CG    -5.00539  13.45103  17.94824 7S   150    1.00000
 4906  317 ASN  OD1   -5.98365  14.15925  17.68984 7S   150    1.00000
 4907  317 ASN  ND2   -4.87700  12.17416  17.48724 7S   150    1.00000
 4908  317 ASN  HD21  -5.59463  11.79468  16.90594 7S   150    0.00000
 4909  317 ASN  HD22  -4.06770  11.63841  17.72359 7S   150    0.00000
 4910  317 ASN  C     -3.84872  15.99245  20.23218 7S   150    1.00000
 4911  317 ASN  O     -3.08037  15.52262  21.06779 7S   150    1.00000
 4912  318 PRO  N     -4.71775  16.92492  20.59209 7S   151    1.00000
 4913  318 PRO  CD    -5.77293  17.46148  19.73802 7S   151    1.00000
 4914  318 PRO  HD1   -6.68788  16.85157  19.88789 7S   151    0.00000
 4915  318 PRO  HD2   -5.49942  17.49116  18.66233 7S   151    0.00000
 4916  318 PRO  CA    -4.63822  17.63545  21.85651 7S   151    1.00000
 4917  318 PRO  HA    -3.63318  17.98654  21.99062 7S   151    0.00000
 4918  318 PRO  CB    -5.61367  18.81267  21.71934 7S   151    1.00000
 4919  318 PRO  HB1   -5.15715  19.76182  22.06888 7S   151    0.00000
 4920  318 PRO  HB2   -6.56230  18.64510  22.26499 7S   151    0.00000
 4921  318 PRO  CG    -5.97197  18.88107  20.23655 7S   151    1.00000
 4922  318 PRO  HG1   -6.99998  19.25137  20.06080 7S   151    0.00000
 4923  318 PRO  HG2   -5.24338  19.53070  19.72431 7S   151    0.00000
 4924  318 PRO  C     -4.97292  16.77057  23.04244 7S   151    1.00000
 4925  318 PRO  O     -4.07478  16.42653  23.80727 7S   151    1.00000
 4926  319 ALA  N     -6.25889  16.40509  23.20621 7S   152    1.00000
 4927  319 ALA  HN    -6.96660  16.74437  22.59007 7S   152    0.00000
 4928  319 ALA  CA    -6.71756  15.60955  24.31302 7S   152    1.00000
 4929  319 ALA  HA    -6.23925  15.96860  25.21356 7S   152    0.00000
 4930  319 ALA  CB    -8.23722  15.73932  24.47022 7S   152    1.00000
 4931  319 ALA  HB1   -8.76568  15.43529  23.54172 7S   152    0.00000
 4932  319 ALA  HB2   -8.48736  16.79967  24.68245 7S   152    0.00000
 4933  319 ALA  HB3   -8.60731  15.12175  25.31525 7S   152    0.00000
 4934  319 ALA  C     -6.37150  14.15019  24.15862 7S   152    1.00000
 4935  319 ALA  O     -6.55430  13.37541  25.09476 7S   152    1.00000
 4936  320 ASN  N     -5.84830  13.73779  22.98127 7S   153    1.00000
 4937  320 ASN  HN    -5.73047  14.37240  22.22036 7S   153    0.00000
 4938  320 ASN  CA    -5.45765  12.36644  22.74572 7S   153    1.00000
 4939  320 ASN  HA    -6.01401  11.71945  23.40787 7S   153    0.00000
 4940  320 ASN  CB    -5.72957  11.91958  21.29487 7S   153    1.00000
 4941  320 ASN  HB1   -5.50264  10.84485  21.15680 7S   153    0.00000
 4942  320 ASN  HB2   -5.08953  12.47622  20.61375 7S   153    0.00000
 4943  320 ASN  CG    -7.17004  12.21901  20.87314 7S   153    1.00000
 4944  320 ASN  OD1   -7.42440  13.03711  19.98374 7S   153    1.00000
 4945  320 ASN  ND2   -8.12944  11.52561  21.54054 7S   153    1.00000
 4946  320 ASN  HD21  -9.08708  11.66777  21.29877 7S   153    0.00000
 4947  320 ASN  HD22  -7.85692  10.89154  22.26176 7S   153    0.00000
 4948  320 ASN  C     -3.99283  12.17709  23.06666 7S   153    1.00000
 4949  320 ASN  O     -3.64256  11.31673  23.87168 7S   153    1.00000
 4950  321 ASN  N     -3.09556  12.97986  22.44801 7S   154    1.00000
 4951  321 ASN  HN    -3.37540  13.65413  21.76731 7S   154    0.00000
 4952  321 ASN  CA    -1.67154  12.93134  22.71434 7S   154    1.00000
 4953  321 ASN  HA    -1.41594  11.96559  23.12952 7S   154    0.00000
 4954  321 ASN  CB    -0.82111  13.16922  21.43980 7S   154    1.00000
 4955  321 ASN  HB1    0.26225  13.09583  21.67091 7S   154    0.00000
 4956  321 ASN  HB2   -1.03638  14.17901  21.03231 7S   154    0.00000
 4957  321 ASN  CG    -1.13573  12.11389  20.37167 7S   154    1.00000
 4958  321 ASN  OD1   -1.67039  11.03450  20.64364 7S   154    1.00000
 4959  321 ASN  ND2   -0.77248  12.45337  19.10054 7S   154    1.00000
 4960  321 ASN  HD21  -0.97739  11.82488  18.35157 7S   154    0.00000
 4961  321 ASN  HD22  -0.37241  13.35049  18.92058 7S   154    0.00000
 4962  321 ASN  C     -1.34477  13.97765  23.76076 7S   154    1.00000
 4963  321 ASN  O     -2.18862  14.32465  24.58484 7S   154    1.00000
 4964  322 ALA  N     -0.08820  14.48361  23.77712 7S   155    1.00000
 4965  322 ALA  HN     0.58927  14.22181  23.09431 7S   155    0.00000
 4966  322 ALA  CA     0.37791  15.37645  24.81184 7S   155    1.00000
 4967  322 ALA  HA    -0.45960  15.74183  25.38937 7S   155    0.00000
 4968  322 ALA  CB     1.38444  14.69133  25.75370 7S   155    1.00000
 4969  322 ALA  HB1    2.26532  14.31983  25.18716 7S   155    0.00000
 4970  322 ALA  HB2    0.90009  13.82377  26.25021 7S   155    0.00000
 4971  322 ALA  HB3    1.73435  15.39316  26.54048 7S   155    0.00000
 4972  322 ALA  C      1.05988  16.56200  24.19371 7S   155    1.00000
 4973  322 ALA  O      1.58977  16.49024  23.08660 7S   155    1.00000
 4974  323 ALA  N      1.06051  17.69872  24.92577 7S   156    1.00000
 4975  323 ALA  HN     0.63134  17.73470  25.82461 7S   156    0.00000
 4976  323 ALA  CA     1.66113  18.92913  24.47490 7S   156    1.00000
 4977  323 ALA  HA     1.66308  18.94757  23.39245 7S   156    0.00000
 4978  323 ALA  CB     0.90210  20.15843  24.99823 7S   156    1.00000
 4979  323 ALA  HB1    1.00380  20.26720  26.09683 7S   156    0.00000
 4980  323 ALA  HB2   -0.17872  20.04207  24.78592 7S   156    0.00000
 4981  323 ALA  HB3    1.25535  21.08488  24.49694 7S   156    0.00000
 4982  323 ALA  C      3.07587  19.01565  24.96619 7S   156    1.00000
 4983  323 ALA  O      3.38851  18.59764  26.07991 7S   156    1.00000
 4984  324 ILE  N      3.97148  19.56711  24.12061 7S   157    1.00000
 4985  324 ILE  HN     3.70117  19.89302  23.21479 7S   157    0.00000
 4986  324 ILE  CA     5.37850  19.67505  24.41866 7S   157    1.00000
 4987  324 ILE  HA     5.64528  18.94108  25.16562 7S   157    0.00000
 4988  324 ILE  CB     6.24711  19.46947  23.18202 7S   157    1.00000
 4989  324 ILE  HB     6.04521  20.27994  22.44363 7S   157    0.00000
 4990  324 ILE  CG2    7.74255  19.51306  23.56468 7S   157    1.00000
 4991  324 ILE  HG21   7.96944  18.71217  24.29979 7S   157    0.00000
 4992  324 ILE  HG22   8.01642  20.49462  23.99876 7S   157    0.00000
 4993  324 ILE  HG23   8.37988  19.36097  22.66941 7S   157    0.00000
 4994  324 ILE  CG1    5.88562  18.12990  22.49956 7S   157    1.00000
 4995  324 ILE  HG11   4.81647  18.14766  22.19431 7S   157    0.00000
 4996  324 ILE  HG12   6.02288  17.30183  23.22919 7S   157    0.00000
 4997  324 ILE  CD     6.72915  17.85321  21.25353 7S   157    1.00000
 4998  324 ILE  HD1    7.77859  17.62456  21.53776 7S   157    0.00000
 4999  324 ILE  HD2    6.72747  18.74285  20.58702 7S   157    0.00000
 5000  324 ILE  HD3    6.32003  16.98342  20.69974 7S   157    0.00000
 5001  324 ILE  C      5.60433  21.04372  24.98924 7S   157    1.00000
 5002  324 ILE  O      5.13980  22.03961  24.44744 7S   157    1.00000
 5003  325 VAL  N      6.34096  21.14183  26.11626 7S   158    1.00000
 5004  325 VAL  HN     6.71021  20.33744  26.57304 7S   158    0.00000
 5005  325 VAL  CA     6.64302  22.41187  26.73398 7S   158    1.00000
 5006  325 VAL  HA     5.71390  22.95133  26.85593 7S   158    0.00000
 5007  325 VAL  CB     7.30155  22.24213  28.09497 7S   158    1.00000
 5008  325 VAL  HB     8.18774  21.57374  28.00372 7S   158    0.00000
 5009  325 VAL  CG1    7.75715  23.60116  28.65566 7S   158    1.00000
 5010  325 VAL  HG11   6.92277  24.33132  28.60361 7S   158    0.00000
 5011  325 VAL  HG12   8.62116  23.99535  28.08118 7S   158    0.00000
 5012  325 VAL  HG13   8.06312  23.48994  29.71687 7S   158    0.00000
 5013  325 VAL  CG2    6.29414  21.58291  29.05564 7S   158    1.00000
 5014  325 VAL  HG21   5.97830  20.58642  28.68547 7S   158    0.00000
 5015  325 VAL  HG22   5.39756  22.22902  29.17026 7S   158    0.00000
 5016  325 VAL  HG23   6.76445  21.45436  30.05426 7S   158    0.00000
 5017  325 VAL  C      7.53172  23.20484  25.80732 7S   158    1.00000
 5018  325 VAL  O      8.55896  22.71426  25.34235 7S   158    1.00000
 5019  326 LEU  N      7.11209  24.45084  25.48804 7S   159    1.00000
 5020  326 LEU  HN     6.26518  24.82738  25.86300 7S   159    0.00000
 5021  326 LEU  CA     7.79728  25.29299  24.54455 7S   159    1.00000
 5022  326 LEU  HA     8.04066  24.69791  23.67381 7S   159    0.00000
 5023  326 LEU  CB     6.89917  26.47297  24.11485 7S   159    1.00000
 5024  326 LEU  HB1    6.74935  27.16595  24.97016 7S   159    0.00000
 5025  326 LEU  HB2    5.90251  26.04729  23.86645 7S   159    0.00000
 5026  326 LEU  CG     7.37989  27.28591  22.89508 7S   159    1.00000
 5027  326 LEU  HG     7.96359  26.61931  22.22073 7S   159    0.00000
 5028  326 LEU  CD1    6.18299  27.81112  22.08513 7S   159    1.00000
 5029  326 LEU  HD11   5.54831  28.47259  22.71092 7S   159    0.00000
 5030  326 LEU  HD12   5.55918  26.97397  21.71091 7S   159    0.00000
 5031  326 LEU  HD13   6.55361  28.38505  21.21413 7S   159    0.00000
 5032  326 LEU  CD2    8.28600  28.45005  23.32062 7S   159    1.00000
 5033  326 LEU  HD21   9.26037  28.07103  23.68855 7S   159    0.00000
 5034  326 LEU  HD22   7.79573  29.01842  24.13929 7S   159    0.00000
 5035  326 LEU  HD23   8.46623  29.13391  22.46565 7S   159    0.00000
 5036  326 LEU  C      9.06303  25.79831  25.17771 7S   159    1.00000
 5037  326 LEU  O      9.03508  26.66080  26.05473 7S   159    1.00000
 5038  327 GLN  N     10.20909  25.22804  24.74983 7S   160    1.00000
 5039  327 GLN  HN    10.19644  24.45574  24.11824 7S   160    0.00000
 5040  327 GLN  CA    11.50661  25.64618  25.20978 7S   160    1.00000
 5041  327 GLN  HA    11.40137  26.32813  26.04149 7S   160    0.00000
 5042  327 GLN  CB    12.39726  24.46141  25.63727 7S   160    1.00000
 5043  327 GLN  HB1   13.36718  24.85365  26.01844 7S   160    0.00000
 5044  327 GLN  HB2   12.59883  23.82130  24.74964 7S   160    0.00000
 5045  327 GLN  CG    11.75458  23.59849  26.73625 7S   160    1.00000
 5046  327 GLN  HG1   10.74559  23.27077  26.41045 7S   160    0.00000
 5047  327 GLN  HG2   11.65189  24.18699  27.67155 7S   160    0.00000
 5048  327 GLN  CD    12.62309  22.36676  27.00692 7S   160    1.00000
 5049  327 GLN  OE1   13.85674  22.42762  26.97828 7S   160    1.00000
 5050  327 GLN  NE2   11.94231  21.21508  27.27887 7S   160    1.00000
 5051  327 GLN  HE21  12.45190  20.37792  27.47064 7S   160    0.00000
 5052  327 GLN  HE22  10.94305  21.21961  27.28029 7S   160    0.00000
 5053  327 GLN  C     12.18722  26.37743  24.09382 7S   160    1.00000
 5054  327 GLN  O     11.75724  26.32985  22.94213 7S   160    1.00000
 5055  328 LEU  N     13.27678  27.09293  24.43904 7S   161    1.00000
 5056  328 LEU  HN    13.60856  27.11012  25.37956 7S   161    0.00000
 5057  328 LEU  CA    14.04034  27.86583  23.49682 7S   161    1.00000
 5058  328 LEU  HA    13.92805  27.42637  22.52002 7S   161    0.00000
 5059  328 LEU  CB    13.64084  29.35993  23.49577 7S   161    1.00000
 5060  328 LEU  HB1   14.35973  29.93036  22.86992 7S   161    0.00000
 5061  328 LEU  HB2   13.70229  29.74829  24.53620 7S   161    0.00000
 5062  328 LEU  CG    12.22995  29.65172  22.94266 7S   161    1.00000
 5063  328 LEU  HG    11.49892  28.97498  23.44047 7S   161    0.00000
 5064  328 LEU  CD1   11.80596  31.08905  23.26666 7S   161    1.00000
 5065  328 LEU  HD11  12.51046  31.80723  22.80454 7S   161    0.00000
 5066  328 LEU  HD12  11.80510  31.25614  24.36428 7S   161    0.00000
 5067  328 LEU  HD13  10.78928  31.29123  22.86881 7S   161    0.00000
 5068  328 LEU  CD2   12.16017  29.39956  21.42947 7S   161    1.00000
 5069  328 LEU  HD21  12.39278  28.33915  21.20185 7S   161    0.00000
 5070  328 LEU  HD22  12.89533  30.04662  20.90489 7S   161    0.00000
 5071  328 LEU  HD23  11.14234  29.62908  21.05013 7S   161    0.00000
 5072  328 LEU  C     15.48189  27.76857  23.91961 7S   161    1.00000
 5073  328 LEU  O     15.73886  27.54674  25.10474 7S   161    1.00000
 5074  329 PRO  N     16.46282  27.93152  23.01978 7S   162    1.00000
 5075  329 PRO  CD    16.26313  27.96253  21.56570 7S   162    1.00000
 5076  329 PRO  HD1   15.94515  28.98526  21.27288 7S   162    0.00000
 5077  329 PRO  HD2   15.50933  27.21714  21.22894 7S   162    0.00000
 5078  329 PRO  CA    17.87334  27.85582  23.37049 7S   162    1.00000
 5079  329 PRO  HA    18.07695  26.89752  23.82737 7S   162    0.00000
 5080  329 PRO  CB    18.61982  28.06418  22.04185 7S   162    1.00000
 5081  329 PRO  HB1   19.54990  27.46178  21.99318 7S   162    0.00000
 5082  329 PRO  HB2   18.86780  29.13715  21.88100 7S   162    0.00000
 5083  329 PRO  CG    17.62603  27.62888  20.96104 7S   162    1.00000
 5084  329 PRO  HG1   17.79670  28.16045  20.00318 7S   162    0.00000
 5085  329 PRO  HG2   17.70414  26.53118  20.80210 7S   162    0.00000
 5086  329 PRO  C     18.22809  28.93707  24.35090 7S   162    1.00000
 5087  329 PRO  O     17.63153  30.01030  24.31292 7S   162    1.00000
 5088  330 GLN  N     19.18404  28.66563  25.25542 7S   163    1.00000
 5089  330 GLN  HN    19.62031  27.77066  25.29213 7S   163    0.00000
 5090  330 GLN  CA    19.58991  29.61410  26.26087 7S   163    1.00000
 5091  330 GLN  HA    18.70858  29.93119  26.80236 7S   163    0.00000
 5092  330 GLN  CB    20.60456  28.98306  27.23678 7S   163    1.00000
 5093  330 GLN  HB1   21.10145  29.77260  27.84126 7S   163    0.00000
 5094  330 GLN  HB2   21.38914  28.46886  26.63551 7S   163    0.00000
 5095  330 GLN  CG    19.98050  27.94255  28.18551 7S   163    1.00000
 5096  330 GLN  HG1   20.78930  27.44856  28.76511 7S   163    0.00000
 5097  330 GLN  HG2   19.44097  27.17011  27.59716 7S   163    0.00000
 5098  330 GLN  CD    19.01752  28.61466  29.17221 7S   163    1.00000
 5099  330 GLN  OE1   19.15337  29.79426  29.51444 7S   163    1.00000
 5100  330 GLN  NE2   18.01623  27.81840  29.64682 7S   163    1.00000
 5101  330 GLN  HE21  17.35657  28.19517  30.29544 7S   163    0.00000
 5102  330 GLN  HE22  17.94927  26.87001  29.34017 7S   163    0.00000
 5103  330 GLN  C     20.21244  30.82506  25.61050 7S   163    1.00000
 5104  330 GLN  O     21.20163  30.71179  24.88874 7S   163    1.00000
 5105  331 GLY  N     19.59342  32.00949  25.83123 7S   164    1.00000
 5106  331 GLY  HN    18.80921  32.07145  26.44618 7S   164    0.00000
 5107  331 GLY  CA    20.03368  33.24578  25.22271 7S   164    1.00000
 5108  331 GLY  HA1   20.96808  33.08452  24.70564 7S   164    0.00000
 5109  331 GLY  HA2   20.11695  33.97078  26.01722 7S   164    0.00000
 5110  331 GLY  C     19.06036  33.78472  24.21364 7S   164    1.00000
 5111  331 GLY  O     19.35580  34.77784  23.55114 7S   164    1.00000
 5112  332 THR  N     17.86655  33.16518  24.06431 7S   165    1.00000
 5113  332 THR  HN    17.63641  32.33999  24.57522 7S   165    0.00000
 5114  332 THR  CA    16.85827  33.62050  23.12909 7S   165    1.00000
 5115  332 THR  HA    17.34567  33.84139  22.18758 7S   165    0.00000
 5116  332 THR  CB    15.79014  32.57029  22.89641 7S   165    1.00000
 5117  332 THR  HB    15.30154  32.29185  23.85782 7S   165    0.00000
 5118  332 THR  OG1   16.38698  31.40663  22.34403 7S   165    1.00000
 5119  332 THR  HG1   16.79120  30.93837  23.08611 7S   165    0.00000
 5120  332 THR  CG2   14.72286  33.07139  21.91053 7S   165    1.00000
 5121  332 THR  HG21  15.19743  33.62871  21.08036 7S   165    0.00000
 5122  332 THR  HG22  14.00815  33.74383  22.42940 7S   165    0.00000
 5123  332 THR  HG23  14.15641  32.21512  21.48554 7S   165    0.00000
 5124  332 THR  C     16.22116  34.88383  23.65477 7S   165    1.00000
 5125  332 THR  O     15.77028  34.93587  24.79729 7S   165    1.00000
 5126  333 THR  N     16.19608  35.94840  22.81952 7S   166    1.00000
 5127  333 THR  HN    16.54386  35.87541  21.88282 7S   166    0.00000
 5128  333 THR  CA    15.72252  37.25689  23.20228 7S   166    1.00000
 5129  333 THR  HA    16.04766  37.44931  24.21624 7S   166    0.00000
 5130  333 THR  CB    16.27580  38.34856  22.30389 7S   166    1.00000
 5131  333 THR  HB    15.98687  38.16645  21.24460 7S   166    0.00000
 5132  333 THR  OG1   17.69661  38.35493  22.38719 7S   166    1.00000
 5133  333 THR  HG1   17.97423  37.43621  22.34643 7S   166    0.00000
 5134  333 THR  CG2   15.75649  39.72965  22.74798 7S   166    1.00000
 5135  333 THR  HG21  15.92387  39.86736  23.83749 7S   166    0.00000
 5136  333 THR  HG22  14.67053  39.82394  22.53860 7S   166    0.00000
 5137  333 THR  HG23  16.28671  40.53697  22.20025 7S   166    0.00000
 5138  333 THR  C     14.21573  37.26246  23.17426 7S   166    1.00000
 5139  333 THR  O     13.59080  37.37151  22.11927 7S   166    1.00000
 5140  334 LEU  N     13.60987  37.12743  24.37518 7S   167    1.00000
 5141  334 LEU  HN    14.14385  36.99169  25.20567 7S   167    0.00000
 5142  334 LEU  CA    12.18476  37.11919  24.55948 7S   167    1.00000
 5143  334 LEU  HA    11.73479  36.80475  23.63846 7S   167    0.00000
 5144  334 LEU  CB    11.75278  36.17038  25.69807 7S   167    1.00000
 5145  334 LEU  HB1   10.73246  36.43933  26.05483 7S   167    0.00000
 5146  334 LEU  HB2   12.45931  36.29562  26.54779 7S   167    0.00000
 5147  334 LEU  CG    11.70667  34.67988  25.31057 7S   167    1.00000
 5148  334 LEU  HG    12.69009  34.38363  24.87692 7S   167    0.00000
 5149  334 LEU  CD1   11.45734  33.82986  26.56639 7S   167    1.00000
 5150  334 LEU  HD11  10.48862  34.11941  27.02735 7S   167    0.00000
 5151  334 LEU  HD12  12.26550  33.99749  27.30917 7S   167    0.00000
 5152  334 LEU  HD13  11.42054  32.75166  26.30772 7S   167    0.00000
 5153  334 LEU  CD2   10.61371  34.41828  24.26304 7S   167    1.00000
 5154  334 LEU  HD21  10.81627  34.99018  23.33546 7S   167    0.00000
 5155  334 LEU  HD22   9.62459  34.72590  24.66033 7S   167    0.00000
 5156  334 LEU  HD23  10.57254  33.34155  24.00857 7S   167    0.00000
 5157  334 LEU  C     11.72275  38.50597  24.93142 7S   167    1.00000
 5158  334 LEU  O     12.37065  39.15080  25.75794 7S   167    1.00000
 5159  335 PRO  N     10.60668  39.00732  24.39288 7S   168    1.00000
 5160  335 PRO  CD     9.86495  38.42020  23.27371 7S   168    1.00000
 5161  335 PRO  HD1    9.12781  37.69055  23.67388 7S   168    0.00000
 5162  335 PRO  HD2   10.53339  37.92853  22.53353 7S   168    0.00000
 5163  335 PRO  CA    10.05765  40.29245  24.78841 7S   168    1.00000
 5164  335 PRO  HA    10.83722  41.03994  24.75598 7S   168    0.00000
 5165  335 PRO  CB     8.91874  40.56447  23.78410 7S   168    1.00000
 5166  335 PRO  HB1    8.93165  41.61707  23.43546 7S   168    0.00000
 5167  335 PRO  HB2    7.92084  40.34906  24.22142 7S   168    0.00000
 5168  335 PRO  CG     9.16257  39.60261  22.61932 7S   168    1.00000
 5169  335 PRO  HG1    8.22130  39.30571  22.11730 7S   168    0.00000
 5170  335 PRO  HG2    9.85141  40.07297  21.88341 7S   168    0.00000
 5171  335 PRO  C      9.51317  40.22523  26.19028 7S   168    1.00000
 5172  335 PRO  O      9.46150  39.15089  26.79127 7S   168    1.00000
 5173  336 LYS  N      9.07970  41.37963  26.72368 7S   169    1.00000
 5174  336 LYS  HN     9.13390  42.24242  26.22023 7S   169    0.00000
 5175  336 LYS  CA     8.50703  41.44527  28.03940 7S   169    1.00000
 5176  336 LYS  HA     9.15907  40.91389  28.71840 7S   169    0.00000
 5177  336 LYS  CB     8.32449  42.89895  28.50497 7S   169    1.00000
 5178  336 LYS  HB1    7.76095  42.92970  29.46284 7S   169    0.00000
 5179  336 LYS  HB2    7.73395  43.44642  27.73940 7S   169    0.00000
 5180  336 LYS  CG     9.64979  43.63821  28.70844 7S   169    1.00000
 5181  336 LYS  HG1    9.40818  44.69321  28.96539 7S   169    0.00000
 5182  336 LYS  HG2   10.23863  43.64910  27.76454 7S   169    0.00000
 5183  336 LYS  CD    10.49249  43.01775  29.82810 7S   169    1.00000
 5184  336 LYS  HD1   10.82833  42.00467  29.50974 7S   169    0.00000
 5185  336 LYS  HD2    9.85867  42.89318  30.73454 7S   169    0.00000
 5186  336 LYS  CE    11.72569  43.85334  30.16329 7S   169    1.00000
 5187  336 LYS  HE1   12.36159  43.96396  29.25918 7S   169    0.00000
 5188  336 LYS  HE2   12.30622  43.37152  30.97688 7S   169    0.00000
 5189  336 LYS  NZ    11.33145  45.20818  30.61461 7S   169    1.00000
 5190  336 LYS  HZ1   10.73308  45.13278  31.46180 7S   169    0.00000
 5191  336 LYS  HZ2   10.79192  45.67745  29.85786 7S   169    0.00000
 5192  336 LYS  HZ3   12.18102  45.76532  30.83128 7S   169    0.00000
 5193  336 LYS  C      7.16398  40.77511  28.05784 7S   169    1.00000
 5194  336 LYS  O      6.34652  40.95020  27.15551 7S   169    1.00000
 5195  337 GLY  N      6.92884  39.95551  29.10277 7S   170    1.00000
 5196  337 GLY  HN     7.59894  39.82450  29.83101 7S   170    0.00000
 5197  337 GLY  CA     5.67472  39.27300  29.26197 7S   170    1.00000
 5198  337 GLY  HA1    4.89089  39.84902  28.79053 7S   170    0.00000
 5199  337 GLY  HA2    5.52561  39.16847  30.32532 7S   170    0.00000
 5200  337 GLY  C      5.66819  37.89727  28.66138 7S   170    1.00000
 5201  337 GLY  O      4.64476  37.22556  28.69829 7S   170    1.00000
 5202  338 PHE  N      6.79421  37.42678  28.09081 7S   171    1.00000
 5203  338 PHE  HN     7.60581  37.99758  27.99459 7S   171    0.00000
 5204  338 PHE  CA     6.89209  36.08536  27.55783 7S   171    1.00000
 5205  338 PHE  HA     5.96122  35.54805  27.69248 7S   171    0.00000
 5206  338 PHE  CB     7.30556  36.06359  26.07541 7S   171    1.00000
 5207  338 PHE  HB1    7.45111  35.01998  25.72186 7S   171    0.00000
 5208  338 PHE  HB2    8.24343  36.63993  25.92743 7S   171    0.00000
 5209  338 PHE  CG     6.23876  36.69004  25.23403 7S   171    1.00000
 5210  338 PHE  CD1    5.16812  35.91796  24.77398 7S   171    1.00000
 5211  338 PHE  HD1    5.10418  34.88497  25.05934 7S   171    0.00000
 5212  338 PHE  CE1    4.19446  36.47617  23.94691 7S   171    1.00000
 5213  338 PHE  HE1    3.39223  35.85625  23.59890 7S   171    0.00000
 5214  338 PHE  CZ     4.26848  37.82592  23.58617 7S   171    1.00000
 5215  338 PHE  HZ     3.50973  38.26130  22.95216 7S   171    0.00000
 5216  338 PHE  CD2    6.30092  38.04543  24.87937 7S   171    1.00000
 5217  338 PHE  HD2    7.11415  38.64794  25.24710 7S   171    0.00000
 5218  338 PHE  CE2    5.32110  38.61469  24.06026 7S   171    1.00000
 5219  338 PHE  HE2    5.38186  39.65713  23.79099 7S   171    0.00000
 5220  338 PHE  C      7.95137  35.36263  28.33334 7S   171    1.00000
 5221  338 PHE  O      8.98219  35.93806  28.68005 7S   171    1.00000
 5222  339 TYR  N      7.69709  34.07266  28.65189 7S   172    1.00000
 5223  339 TYR  HN     6.86912  33.60118  28.35802 7S   172    0.00000
 5224  339 TYR  CA     8.56746  33.32074  29.51889 7S   172    1.00000
 5225  339 TYR  HA     9.57026  33.72543  29.46915 7S   172    0.00000
 5226  339 TYR  CB     8.08968  33.28986  30.99908 7S   172    1.00000
 5227  339 TYR  HB1    8.83937  32.77281  31.63622 7S   172    0.00000
 5228  339 TYR  HB2    7.11793  32.75873  31.08232 7S   172    0.00000
 5229  339 TYR  CG     7.89663  34.68681  31.54147 7S   172    1.00000
 5230  339 TYR  CD1    6.67074  35.35616  31.36321 7S   172    1.00000
 5231  339 TYR  HD1    5.86295  34.86678  30.83944 7S   172    0.00000
 5232  339 TYR  CE1    6.49130  36.65868  31.83824 7S   172    1.00000
 5233  339 TYR  HE1    5.54284  37.15683  31.69995 7S   172    0.00000
 5234  339 TYR  CZ     7.52347  37.29877  32.52797 7S   172    1.00000
 5235  339 TYR  OH     7.30086  38.58224  33.06510 7S   172    1.00000
 5236  339 TYR  HH     7.90138  38.69626  33.80482 7S   172    0.00000
 5237  339 TYR  CD2    8.93419  35.34911  32.22186 7S   172    1.00000
 5238  339 TYR  HD2    9.88132  34.85189  32.37012 7S   172    0.00000
 5239  339 TYR  CE2    8.74928  36.64745  32.71768 7S   172    1.00000
 5240  339 TYR  HE2    9.54940  37.13681  33.25384 7S   172    0.00000
 5241  339 TYR  C      8.62398  31.92051  28.97619 7S   172    1.00000
 5242  339 TYR  O      7.64207  31.38364  28.46957 7S   172    1.00000
 5243  340 ALA  N      9.81745  31.31836  29.06554 7S   173    1.00000
 5244  340 ALA  HN    10.59575  31.76311  29.49814 7S   173    0.00000
 5245  340 ALA  CA    10.11069  29.95789  28.74549 7S   173    1.00000
 5246  340 ALA  HA     9.28558  29.32512  29.05082 7S   173    0.00000
 5247  340 ALA  CB    10.35040  29.80609  27.22622 7S   173    1.00000
 5248  340 ALA  HB1   11.22279  30.41337  26.91421 7S   173    0.00000
 5249  340 ALA  HB2    9.45611  30.19632  26.68559 7S   173    0.00000
 5250  340 ALA  HB3   10.49147  28.74980  26.92138 7S   173    0.00000
 5251  340 ALA  C     11.33075  29.77202  29.69478 7S   173    1.00000
 5252  340 ALA  OT1   12.43724  29.34440  29.29719 7S   173    1.00000
 5253  340 ALA  OT2   11.17140  30.17670  30.88027 7S   173    0.00000
 5254  341 THR  N    -15.05000  21.65145  36.12945 8S   49     1.00000
 5255  341 THR  HT1  -15.29986  20.71986  35.75261 8S   49     0.00000
 5256  341 THR  HT2  -15.74801  22.37864  35.87255 8S   49     0.00000
 5257  341 THR  HT3  -15.01715  21.60275  37.17324 8S   49     0.00000
 5258  341 THR  CA   -13.70898  22.14662  35.75634 8S   49     1.00000
 5259  341 THR  HA   -13.76305  22.45531  34.71626 8S   49     0.00000
 5260  341 THR  CB   -13.32740  23.19506  36.84775 8S   49     1.00000
 5261  341 THR  HB   -12.29947  23.00084  37.21386 8S   49     0.00000
 5262  341 THR  OG1  -13.04680  24.49573  36.53105 8S   49     0.00000
 5263  341 THR  HG1  -13.10778  24.79349  37.45771 8S   49     0.00000
 5264  341 THR  CG2  -14.44213  23.66657  37.82220 8S   49     0.00000
 5265  341 THR  HG21 -15.36099  23.07998  37.84598 8S   49     0.00000
 5266  341 THR  HG22 -14.89761  24.68015  37.61508 8S   49     0.00000
 5267  341 THR  HG23 -14.01203  23.70839  38.83795 8S   49     0.00000
 5268  341 THR  C    -12.73844  20.97928  35.84876 8S   49     1.00000
 5269  341 THR  O    -13.12915  19.83747  36.10101 8S   49     1.00000
 5270  342 ALA  N    -11.42771  21.25441  35.65328 8S   50     1.00000
 5271  342 ALA  HN   -11.10741  22.17539  35.44871 8S   50     0.00000
 5272  342 ALA  CA   -10.40840  20.24635  35.78205 8S   50     1.00000
 5273  342 ALA  HA   -10.62504  19.63949  36.65072 8S   50     0.00000
 5274  342 ALA  CB   -10.30789  19.36627  34.52398 8S   50     1.00000
 5275  342 ALA  HB1   -9.77128  19.88640  33.70607 8S   50     0.00000
 5276  342 ALA  HB2  -11.33178  19.12859  34.16196 8S   50     0.00000
 5277  342 ALA  HB3   -9.77936  18.41774  34.74287 8S   50     0.00000
 5278  342 ALA  C     -9.09148  20.93171  36.00772 8S   50     1.00000
 5279  342 ALA  O     -8.83542  22.01272  35.49089 8S   50     1.00000
 5280  343 SER  N     -8.19566  20.31541  36.80131 8S   51     1.00000
 5281  343 SER  HN    -8.40389  19.44403  37.23699 8S   51     0.00000
 5282  343 SER  CA    -6.89998  20.88476  37.09816 8S   51     1.00000
 5283  343 SER  HA    -7.02057  21.93045  37.34561 8S   51     0.00000
 5284  343 SER  CB    -6.24161  20.14722  38.28590 8S   51     1.00000
 5285  343 SER  HB1   -6.30484  19.05491  38.10489 8S   51     0.00000
 5286  343 SER  HB2   -6.80920  20.39253  39.20644 8S   51     0.00000
 5287  343 SER  OG    -4.87479  20.47759  38.50640 8S   51     1.00000
 5288  343 SER  HG1   -4.87186  21.29294  39.02432 8S   51     0.00000
 5289  343 SER  C     -6.01195  20.77186  35.89696 8S   51     1.00000
 5290  343 SER  O     -6.05402  19.78073  35.17713 8S   51     1.00000
 5291  344 TRP  N     -5.15377  21.79174  35.68510 8S   52     1.00000
 5292  344 TRP  HN    -5.14370  22.59352  36.27906 8S   52     0.00000
 5293  344 TRP  CA    -4.18996  21.79781  34.61458 8S   52     1.00000
 5294  344 TRP  HA    -4.69527  21.52022  33.70528 8S   52     0.00000
 5295  344 TRP  CB    -3.53360  23.18440  34.44932 8S   52     1.00000
 5296  344 TRP  HB1   -2.52946  23.09905  33.98183 8S   52     0.00000
 5297  344 TRP  HB2   -3.41350  23.64342  35.45585 8S   52     0.00000
 5298  344 TRP  CG    -4.34160  24.12295  33.58686 8S   52     1.00000
 5299  344 TRP  CD1   -5.16248  25.13319  33.99111 8S   52     1.00000
 5300  344 TRP  HD1   -5.35404  25.39460  35.02118 8S   52     0.00000
 5301  344 TRP  NE1   -5.70937  25.76568  32.90211 8S   52     1.00000
 5302  344 TRP  HE1   -6.33773  26.51354  32.92899 8S   52     0.00000
 5303  344 TRP  CE2   -5.26567  25.14640  31.75958 8S   52     1.00000
 5304  344 TRP  CD2   -4.39283  24.10674  32.14491 8S   52     1.00000
 5305  344 TRP  CE3   -3.77805  23.29449  31.19042 8S   52     1.00000
 5306  344 TRP  HE3   -3.11291  22.48762  31.45703 8S   52     0.00000
 5307  344 TRP  CZ3   -4.05529  23.55003  29.83747 8S   52     1.00000
 5308  344 TRP  HZ3   -3.59320  22.94279  29.07277 8S   52     0.00000
 5309  344 TRP  CZ2   -5.53998  25.39576  30.42192 8S   52     1.00000
 5310  344 TRP  HZ2   -6.20639  26.18934  30.12051 8S   52     0.00000
 5311  344 TRP  CH2   -4.92286  24.58622  29.45984 8S   52     1.00000
 5312  344 TRP  HH2   -5.11735  24.76844  28.41305 8S   52     0.00000
 5313  344 TRP  C     -3.10538  20.78127  34.80334 8S   52     1.00000
 5314  344 TRP  O     -2.45874  20.41050  33.83073 8S   52     1.00000
 5315  345 PHE  N     -2.88545  20.29871  36.04002 8S   53     1.00000
 5316  345 PHE  HN    -3.45288  20.56043  36.81885 8S   53     0.00000
 5317  345 PHE  CA    -1.80758  19.39386  36.31999 8S   53     1.00000
 5318  345 PHE  HA    -1.24325  19.19652  35.42338 8S   53     0.00000
 5319  345 PHE  CB    -0.85139  19.94064  37.40230 8S   53     1.00000
 5320  345 PHE  HB1   -0.01948  19.23169  37.57783 8S   53     0.00000
 5321  345 PHE  HB2   -1.39760  20.10726  38.35247 8S   53     0.00000
 5322  345 PHE  CG    -0.24731  21.25090  36.99506 8S   53     1.00000
 5323  345 PHE  CD1   -0.91269  22.45464  37.27979 8S   53     1.00000
 5324  345 PHE  HD1   -1.87062  22.43126  37.77848 8S   53     0.00000
 5325  345 PHE  CE1   -0.34794  23.68080  36.92074 8S   53     1.00000
 5326  345 PHE  HE1   -0.86696  24.59806  37.14797 8S   53     0.00000
 5327  345 PHE  CZ     0.89347  23.71249  36.27860 8S   53     1.00000
 5328  345 PHE  HZ     1.34068  24.65590  36.02314 8S   53     0.00000
 5329  345 PHE  CD2    1.00023  21.29539  36.35091 8S   53     1.00000
 5330  345 PHE  HD2    1.52800  20.37780  36.13889 8S   53     0.00000
 5331  345 PHE  CE2    1.56817  22.52185  35.98789 8S   53     1.00000
 5332  345 PHE  HE2    2.53268  22.55228  35.50300 8S   53     0.00000
 5333  345 PHE  C     -2.38225  18.08910  36.79445 8S   53     1.00000
 5334  345 PHE  O     -3.55400  17.98658  37.15478 8S   53     1.00000
 5335  346 THR  N     -1.53028  17.04069  36.82441 8S   54     1.00000
 5336  346 THR  HN    -0.61939  17.11317  36.41657 8S   54     0.00000
 5337  346 THR  CA    -1.83126  15.75565  37.40921 8S   54     1.00000
 5338  346 THR  HA    -2.79835  15.44307  37.04065 8S   54     0.00000
 5339  346 THR  CB    -0.78955  14.69479  37.07274 8S   54     1.00000
 5340  346 THR  HB    -1.02005  13.73510  37.58445 8S   54     0.00000
 5341  346 THR  OG1    0.51853  15.09631  37.46215 8S   54     1.00000
 5342  346 THR  HG1    0.56118  14.99464  38.41687 8S   54     0.00000
 5343  346 THR  CG2   -0.79039  14.44444  35.55400 8S   54     1.00000
 5344  346 THR  HG21  -0.55159  15.36820  34.99372 8S   54     0.00000
 5345  346 THR  HG22  -1.78380  14.08413  35.21875 8S   54     0.00000
 5346  346 THR  HG23  -0.02392  13.68331  35.29516 8S   54     0.00000
 5347  346 THR  C     -1.91551  15.89978  38.90887 8S   54     1.00000
 5348  346 THR  O     -1.57171  16.93508  39.46600 8S   54     1.00000
 5349  347 ALA  N     -2.37454  14.85061  39.60881 8S   55     1.00000
 5350  347 ALA  HN    -2.59451  13.98288  39.17400 8S   55     0.00000
 5351  347 ALA  CA    -2.59518  14.93145  41.02749 8S   55     1.00000
 5352  347 ALA  HA    -2.77697  15.95980  41.31404 8S   55     0.00000
 5353  347 ALA  CB    -3.80736  14.09094  41.44843 8S   55     1.00000
 5354  347 ALA  HB1   -3.57828  13.00555  41.47240 8S   55     0.00000
 5355  347 ALA  HB2   -4.60633  14.23331  40.70001 8S   55     0.00000
 5356  347 ALA  HB3   -4.19084  14.41449  42.43914 8S   55     0.00000
 5357  347 ALA  C     -1.39844  14.41687  41.76739 8S   55     1.00000
 5358  347 ALA  O     -0.74692  13.46477  41.33982 8S   55     1.00000
 5359  348 LEU  N     -1.10684  15.03292  42.93111 8S   56     1.00000
 5360  348 LEU  HN    -1.55643  15.88487  43.19580 8S   56     0.00000
 5361  348 LEU  CA    -0.20622  14.47117  43.90368 8S   56     1.00000
 5362  348 LEU  HA     0.54570  13.88208  43.39947 8S   56     0.00000
 5363  348 LEU  CB     0.45579  15.55766  44.76949 8S   56     1.00000
 5364  348 LEU  HB1    0.86730  15.10878  45.69968 8S   56     0.00000
 5365  348 LEU  HB2   -0.31727  16.30422  45.05780 8S   56     0.00000
 5366  348 LEU  CG     1.61548  16.28488  44.06461 8S   56     1.00000
 5367  348 LEU  HG     1.27058  16.62795  43.06133 8S   56     0.00000
 5368  348 LEU  CD1    2.02855  17.51991  44.87804 8S   56     1.00000
 5369  348 LEU  HD11   2.35780  17.21253  45.89301 8S   56     0.00000
 5370  348 LEU  HD12   1.16641  18.20730  44.98624 8S   56     0.00000
 5371  348 LEU  HD13   2.85867  18.05773  44.37446 8S   56     0.00000
 5372  348 LEU  CD2    2.81572  15.34554  43.86482 8S   56     1.00000
 5373  348 LEU  HD21   2.53696  14.47769  43.23276 8S   56     0.00000
 5374  348 LEU  HD22   3.16405  14.97012  44.85113 8S   56     0.00000
 5375  348 LEU  HD23   3.64847  15.88609  43.36945 8S   56     0.00000
 5376  348 LEU  C     -0.99387  13.55896  44.80455 8S   56     1.00000
 5377  348 LEU  O     -1.98691  13.95977  45.40657 8S   56     1.00000
 5378  349 THR  N     -0.56157  12.28356  44.89609 8S   57     1.00000
 5379  349 THR  HN     0.26869  11.98351  44.43241 8S   57     0.00000
 5380  349 THR  CA    -1.29176  11.25546  45.60013 8S   57     1.00000
 5381  349 THR  HA    -2.33452  11.53810  45.66540 8S   57     0.00000
 5382  349 THR  CB    -1.19538   9.92098  44.88244 8S   57     1.00000
 5383  349 THR  HB    -0.13319   9.59412  44.81244 8S   57     0.00000
 5384  349 THR  OG1   -1.71549  10.05605  43.56386 8S   57     1.00000
 5385  349 THR  HG1   -1.34968  10.87557  43.21881 8S   57     0.00000
 5386  349 THR  CG2   -2.00973   8.84345  45.61884 8S   57     1.00000
 5387  349 THR  HG21  -3.03880   9.21285  45.81831 8S   57     0.00000
 5388  349 THR  HG22  -1.52947   8.58500  46.58599 8S   57     0.00000
 5389  349 THR  HG23  -2.07617   7.91909  45.00998 8S   57     0.00000
 5390  349 THR  C     -0.73497  11.13478  46.99494 8S   57     1.00000
 5391  349 THR  O      0.47587  11.04577  47.18650 8S   57     1.00000
 5392  350 GLN  N     -1.63018  11.12831  48.00688 8S   58     1.00000
 5393  350 GLN  HN    -2.60929  11.24389  47.82769 8S   58     0.00000
 5394  350 GLN  CA    -1.28088  10.94754  49.39212 8S   58     1.00000
 5395  350 GLN  HA    -0.28056  11.32181  49.55441 8S   58     0.00000
 5396  350 GLN  CB    -2.26120  11.69757  50.31819 8S   58     1.00000
 5397  350 GLN  HB1   -3.27974  11.29240  50.15873 8S   58     0.00000
 5398  350 GLN  HB2   -2.28451  12.76452  50.00678 8S   58     0.00000
 5399  350 GLN  CG    -1.90200  11.61573  51.81032 8S   58     1.00000
 5400  350 GLN  HG1   -0.90838  12.08530  51.97468 8S   58     0.00000
 5401  350 GLN  HG2   -1.85783  10.55411  52.13261 8S   58     0.00000
 5402  350 GLN  CD    -2.94608  12.34561  52.65824 8S   58     1.00000
 5403  350 GLN  OE1   -3.88642  12.96606  52.15294 8S   58     1.00000
 5404  350 GLN  NE2   -2.74888  12.27593  54.00347 8S   58     1.00000
 5405  350 GLN  HE21  -3.29001  12.86120  54.61092 8S   58     0.00000
 5406  350 GLN  HE22  -1.99110  11.73354  54.36728 8S   58     0.00000
 5407  350 GLN  C     -1.32245   9.47800  49.72521 8S   58     1.00000
 5408  350 GLN  O     -2.24532   8.76650  49.33256 8S   58     1.00000
 5409  351 HSD  N     -0.29358   8.99174  50.45617 8S   59     1.00000
 5410  351 HSD  HN     0.46627   9.58279  50.71625 8S   59     0.00000
 5411  351 HSD  CA    -0.16227   7.59134  50.79452 8S   59     1.00000
 5412  351 HSD  HA    -0.97211   7.03082  50.35029 8S   59     0.00000
 5413  351 HSD  CB     1.17235   6.99487  50.28963 8S   59     1.00000
 5414  351 HSD  HB1    1.25047   5.93135  50.60068 8S   59     0.00000
 5415  351 HSD  HB2    2.01679   7.54985  50.74792 8S   59     0.00000
 5416  351 HSD  ND1    1.59392   8.22808  48.11495 8S   59     1.00000
 5417  351 HSD  HD1    1.75433   9.12055  48.55152 8S   59     0.00000
 5418  351 HSD  CG     1.31299   7.06562  48.78638 8S   59     1.00000
 5419  351 HSD  CE1    1.61219   7.95685  46.79781 8S   59     1.00000
 5420  351 HSD  HE1    1.87362   8.71874  46.06425 8S   59     0.00000
 5421  351 HSD  NE2    1.32910   6.69604  46.55675 8S   59     1.00000
 5422  351 HSD  CD2    1.16644   6.12570  47.81576 8S   59     1.00000
 5423  351 HSD  HD2    0.96990   5.06714  47.91809 8S   59     0.00000
 5424  351 HSD  C     -0.26596   7.37857  52.28267 8S   59     1.00000
 5425  351 HSD  O     -0.89058   6.41194  52.71601 8S   59     1.00000
 5426  352 GLY  N      0.34500   8.26288  53.10782 8S   60     1.00000
 5427  352 GLY  HN     0.83174   9.05799  52.75697 8S   60     0.00000
 5428  352 GLY  CA     0.35878   8.09678  54.54709 8S   60     1.00000
 5429  352 GLY  HA1    1.32870   8.41953  54.89468 8S   60     0.00000
 5430  352 GLY  HA2    0.14495   7.06824  54.80480 8S   60     0.00000
 5431  352 GLY  C     -0.68201   8.96291  55.18673 8S   60     1.00000
 5432  352 GLY  O     -1.64050   9.39926  54.55328 8S   60     1.00000
 5433  353 LYS  N     -0.51138   9.23024  56.49863 8S   61     1.00000
 5434  353 LYS  HN     0.25684   8.85414  57.01178 8S   61     0.00000
 5435  353 LYS  CA    -1.45101  10.01621  57.26266 8S   61     1.00000
 5436  353 LYS  HA    -2.45521   9.76907  56.95060 8S   61     0.00000
 5437  353 LYS  CB    -1.30386   9.76632  58.77477 8S   61     1.00000
 5438  353 LYS  HB1   -1.93120  10.49323  59.34014 8S   61     0.00000
 5439  353 LYS  HB2   -0.24256   9.91501  59.07416 8S   61     0.00000
 5440  353 LYS  CG    -1.73864   8.35739  59.19121 8S   61     1.00000
 5441  353 LYS  HG1   -1.15932   7.59715  58.62218 8S   61     0.00000
 5442  353 LYS  HG2   -2.81460   8.22870  58.93982 8S   61     0.00000
 5443  353 LYS  CD    -1.53063   8.12138  60.69177 8S   61     1.00000
 5444  353 LYS  HD1   -2.03759   8.92956  61.26451 8S   61     0.00000
 5445  353 LYS  HD2   -0.44005   8.19077  60.90813 8S   61     0.00000
 5446  353 LYS  CE    -2.04048   6.75571  61.16061 8S   61     1.00000
 5447  353 LYS  HE1   -1.79609   6.60296  62.23257 8S   61     0.00000
 5448  353 LYS  HE2   -1.57772   5.94882  60.55367 8S   61     0.00000
 5449  353 LYS  NZ    -3.51198   6.65346  61.01044 8S   61     1.00000
 5450  353 LYS  HZ1   -3.76938   6.78225  60.01085 8S   61     0.00000
 5451  353 LYS  HZ2   -3.97267   7.39115  61.58077 8S   61     0.00000
 5452  353 LYS  HZ3   -3.82933   5.71698  61.33147 8S   61     0.00000
 5453  353 LYS  C     -1.26461  11.48311  57.02817 8S   61     1.00000
 5454  353 LYS  O     -2.22652  12.24605  57.08172 8S   61     1.00000
 5455  354 GLU  N     -0.02014  11.92024  56.75959 8S   62     1.00000
 5456  354 GLU  HN     0.75747  11.30494  56.65897 8S   62     0.00000
 5457  354 GLU  CA     0.28182  13.31395  56.64479 8S   62     1.00000
 5458  354 GLU  HA    -0.08244  13.83589  57.51913 8S   62     0.00000
 5459  354 GLU  CB     1.78431  13.53671  56.55372 8S   62     1.00000
 5460  354 GLU  HB1    1.94032  14.57871  56.19138 8S   62     0.00000
 5461  354 GLU  HB2    2.23159  12.84848  55.79939 8S   62     0.00000
 5462  354 GLU  CG     2.46307  13.33084  57.92034 8S   62     1.00000
 5463  354 GLU  HG1    2.51629  12.25064  58.18074 8S   62     0.00000
 5464  354 GLU  HG2    1.90786  13.87844  58.71355 8S   62     0.00000
 5465  354 GLU  CD     3.83135  13.97605  57.87682 8S   62     1.00000
 5466  354 GLU  OE1    4.06923  14.73037  56.89447 8S   62     1.00000
 5467  354 GLU  OE2    4.64069  13.77825  58.81917 8S   62     1.00000
 5468  354 GLU  C     -0.33564  13.92105  55.42774 8S   62     1.00000
 5469  354 GLU  O     -0.01826  13.54268  54.30237 8S   62     1.00000
 5470  355 ASP  N     -1.22848  14.91206  55.64761 8S   63     1.00000
 5471  355 ASP  HN    -1.52925  15.15119  56.56853 8S   63     0.00000
 5472  355 ASP  CA    -1.84099  15.66409  54.58428 8S   63     1.00000
 5473  355 ASP  HA    -2.26026  14.97036  53.86899 8S   63     0.00000
 5474  355 ASP  CB    -2.94324  16.62039  55.10251 8S   63     1.00000
 5475  355 ASP  HB1   -3.20451  17.38124  54.33695 8S   63     0.00000
 5476  355 ASP  HB2   -2.56946  17.15024  56.00168 8S   63     0.00000
 5477  355 ASP  CG    -4.22522  15.86797  55.46563 8S   63     1.00000
 5478  355 ASP  OD1   -4.27988  14.62205  55.29574 8S   63     1.00000
 5479  355 ASP  OD2   -5.18292  16.55610  55.90802 8S   63     1.00000
 5480  355 ASP  C     -0.79201  16.47491  53.87390 8S   63     1.00000
 5481  355 ASP  O      0.34330  16.62363  54.33104 8S   63     1.00000
 5482  356 LEU  N     -1.15660  17.00455  52.69388 8S   64     1.00000
 5483  356 LEU  HN    -2.07320  16.88147  52.32045 8S   64     0.00000
 5484  356 LEU  CA    -0.23468  17.74951  51.88763 8S   64     1.00000
 5485  356 LEU  HA     0.69924  17.20871  51.86015 8S   64     0.00000
 5486  356 LEU  CB    -0.78274  17.92414  50.46345 8S   64     1.00000
 5487  356 LEU  HB1   -1.71766  18.52565  50.50056 8S   64     0.00000
 5488  356 LEU  HB2   -1.05716  16.91859  50.07580 8S   64     0.00000
 5489  356 LEU  CG     0.18974  18.55756  49.45412 8S   64     1.00000
 5490  356 LEU  HG     0.49372  19.56195  49.82475 8S   64     0.00000
 5491  356 LEU  CD1    1.46422  17.72035  49.27580 8S   64     1.00000
 5492  356 LEU  HD11   1.19320  16.66784  49.06671 8S   64     0.00000
 5493  356 LEU  HD12   2.08745  17.75533  50.19302 8S   64     0.00000
 5494  356 LEU  HD13   2.06099  18.10198  48.42326 8S   64     0.00000
 5495  356 LEU  CD2   -0.53128  18.76062  48.11830 8S   64     1.00000
 5496  356 LEU  HD21  -1.41959  19.41168  48.26476 8S   64     0.00000
 5497  356 LEU  HD22  -0.86451  17.78009  47.72092 8S   64     0.00000
 5498  356 LEU  HD23   0.14446  19.23645  47.37968 8S   64     0.00000
 5499  356 LEU  C     -0.00124  19.09673  52.50299 8S   64     1.00000
 5500  356 LEU  O     -0.92868  19.72053  53.01060 8S   64     1.00000
 5501  357 LYS  N      1.26588  19.55265  52.49225 8S   65     1.00000
 5502  357 LYS  HN     2.02227  18.99902  52.15086 8S   65     0.00000
 5503  357 LYS  CA     1.60860  20.86117  52.97314 8S   65     1.00000
 5504  357 LYS  HA     0.90644  21.57319  52.56406 8S   65     0.00000
 5505  357 LYS  CB     1.62052  20.96723  54.51289 8S   65     1.00000
 5506  357 LYS  HB1    0.56307  20.93894  54.86203 8S   65     0.00000
 5507  357 LYS  HB2    2.05288  21.93939  54.83277 8S   65     0.00000
 5508  357 LYS  CG     2.36889  19.82165  55.20197 8S   65     1.00000
 5509  357 LYS  HG1    3.44964  19.87266  54.94575 8S   65     0.00000
 5510  357 LYS  HG2    1.97228  18.85240  54.82779 8S   65     0.00000
 5511  357 LYS  CD     2.20110  19.85400  56.72356 8S   65     1.00000
 5512  357 LYS  HD1    1.11984  19.93788  56.97405 8S   65     0.00000
 5513  357 LYS  HD2    2.70852  20.76576  57.11241 8S   65     0.00000
 5514  357 LYS  CE     2.79500  18.61501  57.40223 8S   65     1.00000
 5515  357 LYS  HE1    2.69116  18.69508  58.50403 8S   65     0.00000
 5516  357 LYS  HE2    3.86852  18.52263  57.13297 8S   65     0.00000
 5517  357 LYS  NZ     2.10923  17.37159  56.96727 8S   65     1.00000
 5518  357 LYS  HZ1    2.05688  17.34342  55.92811 8S   65     0.00000
 5519  357 LYS  HZ2    1.14411  17.34916  57.35427 8S   65     0.00000
 5520  357 LYS  HZ3    2.64375  16.54309  57.30347 8S   65     0.00000
 5521  357 LYS  C      2.96229  21.19124  52.42945 8S   65     1.00000
 5522  357 LYS  O      3.74207  20.30391  52.08211 8S   65     1.00000
 5523  358 PHE  N      3.25302  22.50539  52.32100 8S   66     1.00000
 5524  358 PHE  HN     2.61051  23.21162  52.61050 8S   66     0.00000
 5525  358 PHE  CA     4.49466  22.97461  51.76376 8S   66     1.00000
 5526  358 PHE  HA     5.22707  22.18971  51.84074 8S   66     0.00000
 5527  358 PHE  CB     4.35557  23.44186  50.29543 8S   66     1.00000
 5528  358 PHE  HB1    5.23730  24.03789  49.97608 8S   66     0.00000
 5529  358 PHE  HB2    3.44056  24.05893  50.18084 8S   66     0.00000
 5530  358 PHE  CG     4.25492  22.27003  49.36696 8S   66     1.00000
 5531  358 PHE  CD1    5.41939  21.65645  48.87656 8S   66     1.00000
 5532  358 PHE  HD1    6.39062  22.02202  49.17765 8S   66     0.00000
 5533  358 PHE  CE1    5.32765  20.58619  47.98115 8S   66     1.00000
 5534  358 PHE  HE1    6.22193  20.12428  47.60199 8S   66     0.00000
 5535  358 PHE  CZ     4.07706  20.11411  47.57016 8S   66     1.00000
 5536  358 PHE  HZ     4.01003  19.28340  46.88313 8S   66     0.00000
 5537  358 PHE  CD2    3.00204  21.79380  48.94657 8S   66     1.00000
 5538  358 PHE  HD2    2.10041  22.26062  49.31288 8S   66     0.00000
 5539  358 PHE  CE2    2.91433  20.72358  48.05125 8S   66     1.00000
 5540  358 PHE  HE2    1.94894  20.36682  47.73315 8S   66     0.00000
 5541  358 PHE  C      4.94493  24.16807  52.56589 8S   66     1.00000
 5542  358 PHE  O      4.10544  24.93540  53.04055 8S   66     1.00000
 5543  359 PRO  N      6.25216  24.39824  52.71553 8S   67     1.00000
 5544  359 PRO  CD     7.29991  23.38441  52.57395 8S   67     1.00000
 5545  359 PRO  HD1    7.59820  23.31644  51.50550 8S   67     0.00000
 5546  359 PRO  HD2    6.96072  22.39177  52.94457 8S   67     0.00000
 5547  359 PRO  CA     6.77197  25.64788  53.24135 8S   67     1.00000
 5548  359 PRO  HA     6.28127  25.87542  54.17662 8S   67     0.00000
 5549  359 PRO  CB     8.28763  25.41707  53.38284 8S   67     1.00000
 5550  359 PRO  HB1    8.68406  25.88839  54.30540 8S   67     0.00000
 5551  359 PRO  HB2    8.84687  25.80633  52.50294 8S   67     0.00000
 5552  359 PRO  CG     8.45316  23.89540  53.43055 8S   67     1.00000
 5553  359 PRO  HG1    9.43822  23.56910  53.04171 8S   67     0.00000
 5554  359 PRO  HG2    8.32060  23.53927  54.47582 8S   67     0.00000
 5555  359 PRO  C      6.50543  26.76076  52.26916 8S   67     1.00000
 5556  359 PRO  O      6.28329  26.49940  51.08658 8S   67     1.00000
 5557  360 ARG  N      6.53174  28.01615  52.75434 8S   68     1.00000
 5558  360 ARG  HN     6.70095  28.19685  53.72025 8S   68     0.00000
 5559  360 ARG  CA     6.27243  29.16569  51.93013 8S   68     1.00000
 5560  360 ARG  HA     5.30051  29.03485  51.47330 8S   68     0.00000
 5561  360 ARG  CB     6.26247  30.45108  52.77169 8S   68     1.00000
 5562  360 ARG  HB1    7.24841  30.57289  53.27343 8S   68     0.00000
 5563  360 ARG  HB2    5.49424  30.33137  53.56854 8S   68     0.00000
 5564  360 ARG  CG     5.95084  31.71497  51.95869 8S   68     1.00000
 5565  360 ARG  HG1    4.94974  31.61030  51.48524 8S   68     0.00000
 5566  360 ARG  HG2    6.70439  31.82384  51.14600 8S   68     0.00000
 5567  360 ARG  CD     6.00687  32.98885  52.79495 8S   68     1.00000
 5568  360 ARG  HD1    5.72415  33.86773  52.17676 8S   68     0.00000
 5569  360 ARG  HD2    7.02500  33.12379  53.22266 8S   68     0.00000
 5570  360 ARG  NE     5.03150  32.85528  53.91727 8S   68     1.00000
 5571  360 ARG  HE     4.52860  31.99917  54.02639 8S   68     0.00000
 5572  360 ARG  CZ     4.83479  33.85518  54.81716 8S   68     1.00000
 5573  360 ARG  NH1    3.94811  33.67415  55.82825 8S   68     1.00000
 5574  360 ARG  HH11   3.45475  32.80934  55.89995 8S   68     0.00000
 5575  360 ARG  HH12   3.79406  34.40742  56.48647 8S   68     0.00000
 5576  360 ARG  NH2    5.51227  35.02723  54.71218 8S   68     1.00000
 5577  360 ARG  HH21   6.16400  35.14912  53.96534 8S   68     0.00000
 5578  360 ARG  HH22   5.35286  35.75570  55.37396 8S   68     0.00000
 5579  360 ARG  C      7.31641  29.28543  50.84637 8S   68     1.00000
 5580  360 ARG  O      8.51128  29.14877  51.10386 8S   68     1.00000
 5581  361 GLY  N      6.85631  29.50141  49.59354 8S   69     1.00000
 5582  361 GLY  HN     5.88099  29.61939  49.41776 8S   69     0.00000
 5583  361 GLY  CA     7.73087  29.63368  48.45257 8S   69     1.00000
 5584  361 GLY  HA1    8.74412  29.80929  48.78088 8S   69     0.00000
 5585  361 GLY  HA2    7.34703  30.45377  47.86965 8S   69     0.00000
 5586  361 GLY  C      7.70221  28.40277  47.59119 8S   69     1.00000
 5587  361 GLY  O      7.86407  28.48807  46.37593 8S   69     1.00000
 5588  362 GLN  N      7.51549  27.21165  48.19828 8S   70     1.00000
 5589  362 GLN  HN     7.40408  27.14772  49.18818 8S   70     0.00000
 5590  362 GLN  CA     7.51252  25.95594  47.48351 8S   70     1.00000
 5591  362 GLN  HA     7.95513  26.08501  46.50537 8S   70     0.00000
 5592  362 GLN  CB     8.30554  24.87360  48.24957 8S   70     1.00000
 5593  362 GLN  HB1    8.29252  23.92205  47.67359 8S   70     0.00000
 5594  362 GLN  HB2    7.81563  24.70008  49.23398 8S   70     0.00000
 5595  362 GLN  CG     9.77169  25.28405  48.48295 8S   70     1.00000
 5596  362 GLN  HG1    9.81828  26.28024  48.97224 8S   70     0.00000
 5597  362 GLN  HG2   10.29579  25.34295  47.50413 8S   70     0.00000
 5598  362 GLN  CD    10.48579  24.26716  49.37882 8S   70     1.00000
 5599  362 GLN  OE1    9.88800  23.32796  49.91556 8S   70     1.00000
 5600  362 GLN  NE2   11.82643  24.47423  49.53219 8S   70     1.00000
 5601  362 GLN  HE21  12.38068  23.78638  49.99824 8S   70     0.00000
 5602  362 GLN  HE22  12.24701  25.30360  49.16583 8S   70     0.00000
 5603  362 GLN  C      6.09425  25.48934  47.29283 8S   70     1.00000
 5604  362 GLN  O      5.16997  25.99335  47.92956 8S   70     1.00000
 5605  363 GLY  N      5.90352  24.50144  46.38401 8S   71     1.00000
 5606  363 GLY  HN     6.66786  24.13169  45.86197 8S   71     0.00000
 5607  363 GLY  CA     4.62797  23.85752  46.17098 8S   71     1.00000
 5608  363 GLY  HA1    3.91564  24.22130  46.88820 8S   71     0.00000
 5609  363 GLY  HA2    4.78880  22.79434  46.25757 8S   71     0.00000
 5610  363 GLY  C      4.07160  24.11390  44.81117 8S   71     1.00000
 5611  363 GLY  O      3.37511  23.26501  44.26485 8S   71     1.00000
 5612  364 VAL  N      4.33854  25.29673  44.21852 8S   72     1.00000
 5613  364 VAL  HN     4.91396  25.98116  44.65664 8S   72     0.00000
 5614  364 VAL  CA     3.75923  25.68807  42.95260 8S   72     1.00000
 5615  364 VAL  HA     2.69561  25.54485  43.03391 8S   72     0.00000
 5616  364 VAL  CB     4.00899  27.15541  42.64497 8S   72     1.00000
 5617  364 VAL  HB     5.10212  27.33523  42.53000 8S   72     0.00000
 5618  364 VAL  CG1    3.29725  27.57333  41.34610 8S   72     1.00000
 5619  364 VAL  HG11   2.20128  27.41778  41.42740 8S   72     0.00000
 5620  364 VAL  HG12   3.68552  27.00274  40.47968 8S   72     0.00000
 5621  364 VAL  HG13   3.48534  28.64707  41.15510 8S   72     0.00000
 5622  364 VAL  CG2    3.50438  28.00726  43.82465 8S   72     1.00000
 5623  364 VAL  HG21   4.04016  27.75952  44.76337 8S   72     0.00000
 5624  364 VAL  HG22   2.41561  27.85501  43.97196 8S   72     0.00000
 5625  364 VAL  HG23   3.67862  29.08067  43.60659 8S   72     0.00000
 5626  364 VAL  C      4.34604  24.81961  41.85630 8S   72     1.00000
 5627  364 VAL  O      5.57299  24.72201  41.78944 8S   72     1.00000
 5628  365 PRO  N      3.56330  24.15640  40.99443 8S   73     1.00000
 5629  365 PRO  CD     2.09975  24.09161  41.04510 8S   73     1.00000
 5630  365 PRO  HD1    1.69108  24.96120  40.48636 8S   73     0.00000
 5631  365 PRO  HD2    1.70410  24.07989  42.08371 8S   73     0.00000
 5632  365 PRO  CA     4.10473  23.25592  39.99337 8S   73     1.00000
[truncated: 108,702 more chars]
