# Supplementary material for: Genetic Uniformity of a Specific Region in SARS-CoV-2 Genome and In-Silico Target-Oriented Repurposing of N-Acetyl-D-Glucosamine
Source: Preprints.org preprint supplement (doi:10.20944/preprints202005.0397.v1), 2020-05-24
Supplement: Supplementary file 7 [file supplementary › S7 File/complex.psf]

PSF CMAP CHEQ

       2 !NTITLE
* PYCHARMM PSF                                                                  
*  DATE:     5/ 8/20     12:11:43      CREATED BY USER: root                    

    7163 !NATOM
       1 1S   50   ALA  N      56  -0.300000       14.0070           0   0.00000     -0.301140E-02
       2 1S   50   ALA  HT1     2   0.330000       1.00800           0   0.00000     -0.301140E-02
       3 1S   50   ALA  HT2     2   0.330000       1.00800           0   0.00000     -0.301140E-02
       4 1S   50   ALA  HT3     2   0.330000       1.00800           0   0.00000     -0.301140E-02
       5 1S   50   ALA  CA     22   0.210000       12.0110           0   0.00000     -0.301140E-02
       6 1S   50   ALA  HA      6   0.100000       1.00800           0   0.00000     -0.301140E-02
       7 1S   50   ALA  CB     24  -0.270000       12.0110           0   0.00000     -0.301140E-02
       8 1S   50   ALA  HB1     3   0.900000E-01   1.00800           0   0.00000     -0.301140E-02
       9 1S   50   ALA  HB2     3   0.900000E-01   1.00800           0   0.00000     -0.301140E-02
      10 1S   50   ALA  HB3     3   0.900000E-01   1.00800           0   0.00000     -0.301140E-02
      11 1S   50   ALA  C      20   0.510000       12.0110           0   0.00000     -0.301140E-02
      12 1S   50   ALA  O      70  -0.510000       15.9990           0   0.00000     -0.301140E-02
      13 1S   51   SER  N      54  -0.470000       14.0070           0   0.00000     -0.301140E-02
      14 1S   51   SER  HN      1   0.310000       1.00800           0   0.00000     -0.301140E-02
      15 1S   51   SER  CA     22   0.700000E-01   12.0110           0   0.00000     -0.301140E-02
      16 1S   51   SER  HA      6   0.900000E-01   1.00800           0   0.00000     -0.301140E-02
      17 1S   51   SER  CB     23   0.500000E-01   12.0110           0   0.00000     -0.301140E-02
      18 1S   51   SER  HB1     3   0.900000E-01   1.00800           0   0.00000     -0.301140E-02
      19 1S   51   SER  HB2     3   0.900000E-01   1.00800           0   0.00000     -0.301140E-02
      20 1S   51   SER  OG     73  -0.660000       15.9990           0   0.00000     -0.301140E-02
      21 1S   51   SER  HG1     1   0.430000       1.00800           0   0.00000     -0.301140E-02
      22 1S   51   SER  C      20   0.510000       12.0110           0   0.00000     -0.301140E-02
      23 1S   51   SER  O      70  -0.510000       15.9990           0   0.00000     -0.301140E-02
      24 1S   52   TRP  N      54  -0.470000       14.0070           0   0.00000     -0.301140E-02
      25 1S   52   TRP  HN      1   0.310000       1.00800           0   0.00000     -0.301140E-02
      26 1S   52   TRP  CA     22   0.700000E-01   12.0110           0   0.00000     -0.301140E-02
      27 1S   52   TRP  HA      6   0.900000E-01   1.00800           0   0.00000     -0.301140E-02
      28 1S   52   TRP  CB     23  -0.180000       12.0110           0   0.00000     -0.301140E-02
      29 1S   52   TRP  HB1     3   0.900000E-01   1.00800           0   0.00000     -0.301140E-02
      30 1S   52   TRP  HB2     3   0.900000E-01   1.00800           0   0.00000     -0.301140E-02
      31 1S   52   TRP  CG     28  -0.300000E-01   12.0110           0   0.00000     -0.301140E-02
      32 1S   52   TRP  CD1    21   0.350000E-01   12.0110           0   0.00000     -0.301140E-02
      33 1S   52   TRP  HD1     5   0.115000       1.00800           0   0.00000     -0.301140E-02
      34 1S   52   TRP  NE1    58  -0.610000       14.0070           0   0.00000     -0.301140E-02
      35 1S   52   TRP  HE1     1   0.380000       1.00800           0   0.00000     -0.301140E-02
      36 1S   52   TRP  CE2    27   0.130000       12.0110           0   0.00000     -0.301140E-02
      37 1S   52   TRP  CD2    27  -0.200000E-01   12.0110           0   0.00000     -0.301140E-02
      38 1S   52   TRP  CE3    21  -0.115000       12.0110           0   0.00000     -0.301140E-02
      39 1S   52   TRP  HE3     5   0.115000       1.00800           0   0.00000     -0.301140E-02
      40 1S   52   TRP  CZ3    21  -0.115000       12.0110           0   0.00000     -0.301140E-02
      41 1S   52   TRP  HZ3     5   0.115000       1.00800           0   0.00000     -0.301140E-02
      42 1S   52   TRP  CZ2    21  -0.115000       12.0110           0   0.00000     -0.301140E-02
      43 1S   52   TRP  HZ2     5   0.115000       1.00800           0   0.00000     -0.301140E-02
      44 1S   52   TRP  CH2    21  -0.115000       12.0110           0   0.00000     -0.301140E-02
      45 1S   52   TRP  HH2     5   0.115000       1.00800           0   0.00000     -0.301140E-02
      46 1S   52   TRP  C      20   0.510000       12.0110           0   0.00000     -0.301140E-02
      47 1S   52   TRP  O      70  -0.510000       15.9990           0   0.00000     -0.301140E-02
      48 1S   53   PHE  N      54  -0.470000       14.0070           0   0.00000     -0.301140E-02
      49 1S   53   PHE  HN      1   0.310000       1.00800           0   0.00000     -0.301140E-02
      50 1S   53   PHE  CA     22   0.700000E-01   12.0110           0   0.00000     -0.301140E-02
      51 1S   53   PHE  HA      6   0.900000E-01   1.00800           0   0.00000     -0.301140E-02
      52 1S   53   PHE  CB     23  -0.180000       12.0110           0   0.00000     -0.301140E-02
      53 1S   53   PHE  HB1     3   0.900000E-01   1.00800           0   0.00000     -0.301140E-02
      54 1S   53   PHE  HB2     3   0.900000E-01   1.00800           0   0.00000     -0.301140E-02
      55 1S   53   PHE  CG     21    0.00000       12.0110           0   0.00000     -0.301140E-02
      56 1S   53   PHE  CD1    21  -0.115000       12.0110           0   0.00000     -0.301140E-02
      57 1S   53   PHE  HD1     5   0.115000       1.00800           0   0.00000     -0.301140E-02
      58 1S   53   PHE  CE1    21  -0.115000       12.0110           0   0.00000     -0.301140E-02
      59 1S   53   PHE  HE1     5   0.115000       1.00800           0   0.00000     -0.301140E-02
      60 1S   53   PHE  CZ     21  -0.115000       12.0110           0   0.00000     -0.301140E-02
      61 1S   53   PHE  HZ      5   0.115000       1.00800           0   0.00000     -0.301140E-02
      62 1S   53   PHE  CD2    21  -0.115000       12.0110           0   0.00000     -0.301140E-02
      63 1S   53   PHE  HD2     5   0.115000       1.00800           0   0.00000     -0.301140E-02
      64 1S   53   PHE  CE2    21  -0.115000       12.0110           0   0.00000     -0.301140E-02
      65 1S   53   PHE  HE2     5   0.115000       1.00800           0   0.00000     -0.301140E-02
      66 1S   53   PHE  C      20   0.510000       12.0110           0   0.00000     -0.301140E-02
      67 1S   53   PHE  O      70  -0.510000       15.9990           0   0.00000     -0.301140E-02
      68 1S   54   THR  N      54  -0.470000       14.0070           0   0.00000     -0.301140E-02
      69 1S   54   THR  HN      1   0.310000       1.00800           0   0.00000     -0.301140E-02
      70 1S   54   THR  CA     22   0.700000E-01   12.0110           0   0.00000     -0.301140E-02
      71 1S   54   THR  HA      6   0.900000E-01   1.00800           0   0.00000     -0.301140E-02
      72 1S   54   THR  CB     22   0.140000       12.0110           0   0.00000     -0.301140E-02
      73 1S   54   THR  HB      3   0.900000E-01   1.00800           0   0.00000     -0.301140E-02
      74 1S   54   THR  OG1    73  -0.660000       15.9990           0   0.00000     -0.301140E-02
      75 1S   54   THR  HG1     1   0.430000       1.00800           0   0.00000     -0.301140E-02
      76 1S   54   THR  CG2    24  -0.270000       12.0110           0   0.00000     -0.301140E-02
      77 1S   54   THR  HG21    3   0.900000E-01   1.00800           0   0.00000     -0.301140E-02
      78 1S   54   THR  HG22    3   0.900000E-01   1.00800           0   0.00000     -0.301140E-02
      79 1S   54   THR  HG23    3   0.900000E-01   1.00800           0   0.00000     -0.301140E-02
      80 1S   54   THR  C      20   0.510000       12.0110           0   0.00000     -0.301140E-02
      81 1S   54   THR  O      70  -0.510000       15.9990           0   0.00000     -0.301140E-02
      82 1S   55   ALA  N      54  -0.470000       14.0070           0   0.00000     -0.301140E-02
      83 1S   55   ALA  HN      1   0.310000       1.00800           0   0.00000     -0.301140E-02
      84 1S   55   ALA  CA     22   0.700000E-01   12.0110           0   0.00000     -0.301140E-02
      85 1S   55   ALA  HA      6   0.900000E-01   1.00800           0   0.00000     -0.301140E-02
      86 1S   55   ALA  CB     24  -0.270000       12.0110           0   0.00000     -0.301140E-02
      87 1S   55   ALA  HB1     3   0.900000E-01   1.00800           0   0.00000     -0.301140E-02
      88 1S   55   ALA  HB2     3   0.900000E-01   1.00800           0   0.00000     -0.301140E-02
      89 1S   55   ALA  HB3     3   0.900000E-01   1.00800           0   0.00000     -0.301140E-02
      90 1S   55   ALA  C      20   0.510000       12.0110           0   0.00000     -0.301140E-02
      91 1S   55   ALA  O      70  -0.510000       15.9990           0   0.00000     -0.301140E-02
      92 1S   56   LEU  N      54  -0.470000       14.0070           0   0.00000     -0.301140E-02
      93 1S   56   LEU  HN      1   0.310000       1.00800           0   0.00000     -0.301140E-02
      94 1S   56   LEU  CA     22   0.700000E-01   12.0110           0   0.00000     -0.301140E-02
      95 1S   56   LEU  HA      6   0.900000E-01   1.00800           0   0.00000     -0.301140E-02
      96 1S   56   LEU  CB     23  -0.180000       12.0110           0   0.00000     -0.301140E-02
      97 1S   56   LEU  HB1     3   0.900000E-01   1.00800           0   0.00000     -0.301140E-02
      98 1S   56   LEU  HB2     3   0.900000E-01   1.00800           0   0.00000     -0.301140E-02
      99 1S   56   LEU  CG     22  -0.900000E-01   12.0110           0   0.00000     -0.301140E-02
     100 1S   56   LEU  HG      3   0.900000E-01   1.00800           0   0.00000     -0.301140E-02
     101 1S   56   LEU  CD1    24  -0.270000       12.0110           0   0.00000     -0.301140E-02
     102 1S   56   LEU  HD11    3   0.900000E-01   1.00800           0   0.00000     -0.301140E-02
     103 1S   56   LEU  HD12    3   0.900000E-01   1.00800           0   0.00000     -0.301140E-02
     104 1S   56   LEU  HD13    3   0.900000E-01   1.00800           0   0.00000     -0.301140E-02
     105 1S   56   LEU  CD2    24  -0.270000       12.0110           0   0.00000     -0.301140E-02
     106 1S   56   LEU  HD21    3   0.900000E-01   1.00800           0   0.00000     -0.301140E-02
     107 1S   56   LEU  HD22    3   0.900000E-01   1.00800           0   0.00000     -0.301140E-02
     108 1S   56   LEU  HD23    3   0.900000E-01   1.00800           0   0.00000     -0.301140E-02
     109 1S   56   LEU  C      20   0.510000       12.0110           0   0.00000     -0.301140E-02
     110 1S   56   LEU  O      70  -0.510000       15.9990           0   0.00000     -0.301140E-02
     111 1S   57   THR  N      54  -0.470000       14.0070           0   0.00000     -0.301140E-02
     112 1S   57   THR  HN      1   0.310000       1.00800           0   0.00000     -0.301140E-02
     113 1S   57   THR  CA     22   0.700000E-01   12.0110           0   0.00000     -0.301140E-02
     114 1S   57   THR  HA      6   0.900000E-01   1.00800           0   0.00000     -0.301140E-02
     115 1S   57   THR  CB     22   0.140000       12.0110           0   0.00000     -0.301140E-02
     116 1S   57   THR  HB      3   0.900000E-01   1.00800           0   0.00000     -0.301140E-02
     117 1S   57   THR  OG1    73  -0.660000       15.9990           0   0.00000     -0.301140E-02
     118 1S   57   THR  HG1     1   0.430000       1.00800           0   0.00000     -0.301140E-02
     119 1S   57   THR  CG2    24  -0.270000       12.0110           0   0.00000     -0.301140E-02
     120 1S   57   THR  HG21    3   0.900000E-01   1.00800           0   0.00000     -0.301140E-02
     121 1S   57   THR  HG22    3   0.900000E-01   1.00800           0   0.00000     -0.301140E-02
     122 1S   57   THR  HG23    3   0.900000E-01   1.00800           0   0.00000     -0.301140E-02
     123 1S   57   THR  C      20   0.510000       12.0110           0   0.00000     -0.301140E-02
     124 1S   57   THR  O      70  -0.510000       15.9990           0   0.00000     -0.301140E-02
     125 1S   58   GLN  N      54  -0.470000       14.0070           0   0.00000     -0.301140E-02
     126 1S   58   GLN  HN      1   0.310000       1.00800           0   0.00000     -0.301140E-02
     127 1S   58   GLN  CA     22   0.700000E-01   12.0110           0   0.00000     -0.301140E-02
     128 1S   58   GLN  HA      6   0.900000E-01   1.00800           0   0.00000     -0.301140E-02
     129 1S   58   GLN  CB     23  -0.180000       12.0110           0   0.00000     -0.301140E-02
     130 1S   58   GLN  HB1     3   0.900000E-01   1.00800           0   0.00000     -0.301140E-02
     131 1S   58   GLN  HB2     3   0.900000E-01   1.00800           0   0.00000     -0.301140E-02
     132 1S   58   GLN  CG     23  -0.180000       12.0110           0   0.00000     -0.301140E-02
     133 1S   58   GLN  HG1     3   0.900000E-01   1.00800           0   0.00000     -0.301140E-02
     134 1S   58   GLN  HG2     3   0.900000E-01   1.00800           0   0.00000     -0.301140E-02
     135 1S   58   GLN  CD     32   0.550000       12.0110           0   0.00000     -0.301140E-02
     136 1S   58   GLN  OE1    70  -0.550000       15.9990           0   0.00000     -0.301140E-02
     137 1S   58   GLN  NE2    55  -0.620000       14.0070           0   0.00000     -0.301140E-02
     138 1S   58   GLN  HE21    1   0.320000       1.00800           0   0.00000     -0.301140E-02
     139 1S   58   GLN  HE22    1   0.300000       1.00800           0   0.00000     -0.301140E-02
     140 1S   58   GLN  C      20   0.510000       12.0110           0   0.00000     -0.301140E-02
     141 1S   58   GLN  O      70  -0.510000       15.9990           0   0.00000     -0.301140E-02
     142 1S   59   HSD  N      54  -0.470000       14.0070           0   0.00000     -0.301140E-02
     143 1S   59   HSD  HN      1   0.310000       1.00800           0   0.00000     -0.301140E-02
     144 1S   59   HSD  CA     22   0.700000E-01   12.0110           0   0.00000     -0.301140E-02
     145 1S   59   HSD  HA      6   0.900000E-01   1.00800           0   0.00000     -0.301140E-02
     146 1S   59   HSD  CB     23  -0.900000E-01   12.0110           0   0.00000     -0.301140E-02
     147 1S   59   HSD  HB1     3   0.900000E-01   1.00800           0   0.00000     -0.301140E-02
     148 1S   59   HSD  HB2     3   0.900000E-01   1.00800           0   0.00000     -0.301140E-02
     149 1S   59   HSD  ND1    51  -0.360000       14.0070           0   0.00000     -0.301140E-02
     150 1S   59   HSD  HD1     1   0.320000       1.00800           0   0.00000     -0.301140E-02
     151 1S   59   HSD  CG     25  -0.500000E-01   12.0110           0   0.00000     -0.301140E-02
     152 1S   59   HSD  CE1    26   0.250000       12.0110           0   0.00000     -0.301140E-02
     153 1S   59   HSD  HE1     7   0.130000       1.00800           0   0.00000     -0.301140E-02
     154 1S   59   HSD  NE2    52  -0.700000       14.0070           0   0.00000     -0.301140E-02
     155 1S   59   HSD  CD2    25   0.220000       12.0110           0   0.00000     -0.301140E-02
     156 1S   59   HSD  HD2     9   0.100000       1.00800           0   0.00000     -0.301140E-02
     157 1S   59   HSD  C      20   0.510000       12.0110           0   0.00000     -0.301140E-02
     158 1S   59   HSD  O      70  -0.510000       15.9990           0   0.00000     -0.301140E-02
     159 1S   60   GLY  N      54  -0.470000       14.0070           0   0.00000     -0.301140E-02
     160 1S   60   GLY  HN      1   0.310000       1.00800           0   0.00000     -0.301140E-02
     161 1S   60   GLY  CA     23  -0.200000E-01   12.0110           0   0.00000     -0.301140E-02
     162 1S   60   GLY  HA1     6   0.900000E-01   1.00800           0   0.00000     -0.301140E-02
     163 1S   60   GLY  HA2     6   0.900000E-01   1.00800           0   0.00000     -0.301140E-02
     164 1S   60   GLY  C      20   0.510000       12.0110           0   0.00000     -0.301140E-02
     165 1S   60   GLY  O      70  -0.510000       15.9990           0   0.00000     -0.301140E-02
     166 1S   61   LYS  N      54  -0.470000       14.0070           0   0.00000     -0.301140E-02
     167 1S   61   LYS  HN      1   0.310000       1.00800           0   0.00000     -0.301140E-02
     168 1S   61   LYS  CA     22   0.700000E-01   12.0110           0   0.00000     -0.301140E-02
     169 1S   61   LYS  HA      6   0.900000E-01   1.00800           0   0.00000     -0.301140E-02
     170 1S   61   LYS  CB     23  -0.180000       12.0110           0   0.00000     -0.301140E-02
     171 1S   61   LYS  HB1     3   0.900000E-01   1.00800           0   0.00000     -0.301140E-02
     172 1S   61   LYS  HB2     3   0.900000E-01   1.00800           0   0.00000     -0.301140E-02
     173 1S   61   LYS  CG     23  -0.180000       12.0110           0   0.00000     -0.301140E-02
     174 1S   61   LYS  HG1     3   0.900000E-01   1.00800           0   0.00000     -0.301140E-02
     175 1S   61   LYS  HG2     3   0.900000E-01   1.00800           0   0.00000     -0.301140E-02
     176 1S   61   LYS  CD     23  -0.180000       12.0110           0   0.00000     -0.301140E-02
     177 1S   61   LYS  HD1     3   0.900000E-01   1.00800           0   0.00000     -0.301140E-02
     178 1S   61   LYS  HD2     3   0.900000E-01   1.00800           0   0.00000     -0.301140E-02
     179 1S   61   LYS  CE     23   0.210000       12.0110           0   0.00000     -0.301140E-02
     180 1S   61   LYS  HE1     3   0.500000E-01   1.00800           0   0.00000     -0.301140E-02
     181 1S   61   LYS  HE2     3   0.500000E-01   1.00800           0   0.00000     -0.301140E-02
     182 1S   61   LYS  NZ     56  -0.300000       14.0070           0   0.00000     -0.301140E-02
     183 1S   61   LYS  HZ1     2   0.330000       1.00800           0   0.00000     -0.301140E-02
     184 1S   61   LYS  HZ2     2   0.330000       1.00800           0   0.00000     -0.301140E-02
     185 1S   61   LYS  HZ3     2   0.330000       1.00800           0   0.00000     -0.301140E-02
     186 1S   61   LYS  C      20   0.510000       12.0110           0   0.00000     -0.301140E-02
     187 1S   61   LYS  O      70  -0.510000       15.9990           0   0.00000     -0.301140E-02
     188 1S   62   GLU  N      54  -0.470000       14.0070           0   0.00000     -0.301140E-02
     189 1S   62   GLU  HN      1   0.310000       1.00800           0   0.00000     -0.301140E-02
     190 1S   62   GLU  CA     22   0.700000E-01   12.0110           0   0.00000     -0.301140E-02
     191 1S   62   GLU  HA      6   0.900000E-01   1.00800           0   0.00000     -0.301140E-02
     192 1S   62   GLU  CB     23  -0.180000       12.0110           0   0.00000     -0.301140E-02
     193 1S   62   GLU  HB1     3   0.900000E-01   1.00800           0   0.00000     -0.301140E-02
     194 1S   62   GLU  HB2     3   0.900000E-01   1.00800           0   0.00000     -0.301140E-02
     195 1S   62   GLU  CG     23  -0.280000       12.0110           0   0.00000     -0.301140E-02
     196 1S   62   GLU  HG1     3   0.900000E-01   1.00800           0   0.00000     -0.301140E-02
     197 1S   62   GLU  HG2     3   0.900000E-01   1.00800           0   0.00000     -0.301140E-02
     198 1S   62   GLU  CD     32   0.620000       12.0110           0   0.00000     -0.301140E-02
     199 1S   62   GLU  OE1    72  -0.760000       15.9990           0   0.00000     -0.301140E-02
     200 1S   62   GLU  OE2    72  -0.760000       15.9990           0   0.00000     -0.301140E-02
     201 1S   62   GLU  C      20   0.510000       12.0110           0   0.00000     -0.301140E-02
     202 1S   62   GLU  O      70  -0.510000       15.9990           0   0.00000     -0.301140E-02
     203 1S   63   ASP  N      54  -0.470000       14.0070           0   0.00000     -0.301140E-02
     204 1S   63   ASP  HN      1   0.310000       1.00800           0   0.00000     -0.301140E-02
     205 1S   63   ASP  CA     22   0.700000E-01   12.0110           0   0.00000     -0.301140E-02
     206 1S   63   ASP  HA      6   0.900000E-01   1.00800           0   0.00000     -0.301140E-02
     207 1S   63   ASP  CB     23  -0.280000       12.0110           0   0.00000     -0.301140E-02
     208 1S   63   ASP  HB1     3   0.900000E-01   1.00800           0   0.00000     -0.301140E-02
     209 1S   63   ASP  HB2     3   0.900000E-01   1.00800           0   0.00000     -0.301140E-02
     210 1S   63   ASP  CG     32   0.620000       12.0110           0   0.00000     -0.301140E-02
     211 1S   63   ASP  OD1    72  -0.760000       15.9990           0   0.00000     -0.301140E-02
     212 1S   63   ASP  OD2    72  -0.760000       15.9990           0   0.00000     -0.301140E-02
     213 1S   63   ASP  C      20   0.510000       12.0110           0   0.00000     -0.301140E-02
     214 1S   63   ASP  O      70  -0.510000       15.9990           0   0.00000     -0.301140E-02
     215 1S   64   LEU  N      54  -0.470000       14.0070           0   0.00000     -0.301140E-02
     216 1S   64   LEU  HN      1   0.310000       1.00800           0   0.00000     -0.301140E-02
     217 1S   64   LEU  CA     22   0.700000E-01   12.0110           0   0.00000     -0.301140E-02
     218 1S   64   LEU  HA      6   0.900000E-01   1.00800           0   0.00000     -0.301140E-02
     219 1S   64   LEU  CB     23  -0.180000       12.0110           0   0.00000     -0.301140E-02
     220 1S   64   LEU  HB1     3   0.900000E-01   1.00800           0   0.00000     -0.301140E-02
     221 1S   64   LEU  HB2     3   0.900000E-01   1.00800           0   0.00000     -0.301140E-02
     222 1S   64   LEU  CG     22  -0.900000E-01   12.0110           0   0.00000     -0.301140E-02
     223 1S   64   LEU  HG      3   0.900000E-01   1.00800           0   0.00000     -0.301140E-02
     224 1S   64   LEU  CD1    24  -0.270000       12.0110           0   0.00000     -0.301140E-02
     225 1S   64   LEU  HD11    3   0.900000E-01   1.00800           0   0.00000     -0.301140E-02
     226 1S   64   LEU  HD12    3   0.900000E-01   1.00800           0   0.00000     -0.301140E-02
     227 1S   64   LEU  HD13    3   0.900000E-01   1.00800           0   0.00000     -0.301140E-02
     228 1S   64   LEU  CD2    24  -0.270000       12.0110           0   0.00000     -0.301140E-02
     229 1S   64   LEU  HD21    3   0.900000E-01   1.00800           0   0.00000     -0.301140E-02
     230 1S   64   LEU  HD22    3   0.900000E-01   1.00800           0   0.00000     -0.301140E-02
     231 1S   64   LEU  HD23    3   0.900000E-01   1.00800           0   0.00000     -0.301140E-02
     232 1S   64   LEU  C      20   0.510000       12.0110           0   0.00000     -0.301140E-02
     233 1S   64   LEU  O      70  -0.510000       15.9990           0   0.00000     -0.301140E-02
     234 1S   65   LYS  N      54  -0.470000       14.0070           0   0.00000     -0.301140E-02
     235 1S   65   LYS  HN      1   0.310000       1.00800           0   0.00000     -0.301140E-02
     236 1S   65   LYS  CA     22   0.700000E-01   12.0110           0   0.00000     -0.301140E-02
     237 1S   65   LYS  HA      6   0.900000E-01   1.00800           0   0.00000     -0.301140E-02
     238 1S   65   LYS  CB     23  -0.180000       12.0110           0   0.00000     -0.301140E-02
     239 1S   65   LYS  HB1     3   0.900000E-01   1.00800           0   0.00000     -0.301140E-02
     240 1S   65   LYS  HB2     3   0.900000E-01   1.00800           0   0.00000     -0.301140E-02
     241 1S   65   LYS  CG     23  -0.180000       12.0110           0   0.00000     -0.301140E-02
     242 1S   65   LYS  HG1     3   0.900000E-01   1.00800           0   0.00000     -0.301140E-02
     243 1S   65   LYS  HG2     3   0.900000E-01   1.00800           0   0.00000     -0.301140E-02
     244 1S   65   LYS  CD     23  -0.180000       12.0110           0   0.00000     -0.301140E-02
     245 1S   65   LYS  HD1     3   0.900000E-01   1.00800           0   0.00000     -0.301140E-02
     246 1S   65   LYS  HD2     3   0.900000E-01   1.00800           0   0.00000     -0.301140E-02
     247 1S   65   LYS  CE     23   0.210000       12.0110           0   0.00000     -0.301140E-02
     248 1S   65   LYS  HE1     3   0.500000E-01   1.00800           0   0.00000     -0.301140E-02
     249 1S   65   LYS  HE2     3   0.500000E-01   1.00800           0   0.00000     -0.301140E-02
     250 1S   65   LYS  NZ     56  -0.300000       14.0070           0   0.00000     -0.301140E-02
     251 1S   65   LYS  HZ1     2   0.330000       1.00800           0   0.00000     -0.301140E-02
     252 1S   65   LYS  HZ2     2   0.330000       1.00800           0   0.00000     -0.301140E-02
     253 1S   65   LYS  HZ3     2   0.330000       1.00800           0   0.00000     -0.301140E-02
     254 1S   65   LYS  C      20   0.510000       12.0110           0   0.00000     -0.301140E-02
     255 1S   65   LYS  O      70  -0.510000       15.9990           0   0.00000     -0.301140E-02
     256 1S   66   PHE  N      54  -0.470000       14.0070           0   0.00000     -0.301140E-02
     257 1S   66   PHE  HN      1   0.310000       1.00800           0   0.00000     -0.301140E-02
     258 1S   66   PHE  CA     22   0.700000E-01   12.0110           0   0.00000     -0.301140E-02
     259 1S   66   PHE  HA      6   0.900000E-01   1.00800           0   0.00000     -0.301140E-02
     260 1S   66   PHE  CB     23  -0.180000       12.0110           0   0.00000     -0.301140E-02
     261 1S   66   PHE  HB1     3   0.900000E-01   1.00800           0   0.00000     -0.301140E-02
     262 1S   66   PHE  HB2     3   0.900000E-01   1.00800           0   0.00000     -0.301140E-02
     263 1S   66   PHE  CG     21    0.00000       12.0110           0   0.00000     -0.301140E-02
     264 1S   66   PHE  CD1    21  -0.115000       12.0110           0   0.00000     -0.301140E-02
     265 1S   66   PHE  HD1     5   0.115000       1.00800           0   0.00000     -0.301140E-02
     266 1S   66   PHE  CE1    21  -0.115000       12.0110           0   0.00000     -0.301140E-02
     267 1S   66   PHE  HE1     5   0.115000       1.00800           0   0.00000     -0.301140E-02
     268 1S   66   PHE  CZ     21  -0.115000       12.0110           0   0.00000     -0.301140E-02
     269 1S   66   PHE  HZ      5   0.115000       1.00800           0   0.00000     -0.301140E-02
     270 1S   66   PHE  CD2    21  -0.115000       12.0110           0   0.00000     -0.301140E-02
     271 1S   66   PHE  HD2     5   0.115000       1.00800           0   0.00000     -0.301140E-02
     272 1S   66   PHE  CE2    21  -0.115000       12.0110           0   0.00000     -0.301140E-02
     273 1S   66   PHE  HE2     5   0.115000       1.00800           0   0.00000     -0.301140E-02
     274 1S   66   PHE  C      20   0.510000       12.0110           0   0.00000     -0.301140E-02
     275 1S   66   PHE  O      70  -0.510000       15.9990           0   0.00000     -0.301140E-02
     276 1S   67   PRO  N      50  -0.290000       14.0070           0   0.00000     -0.301140E-02
     277 1S   67   PRO  CD     31    0.00000       12.0110           0   0.00000     -0.301140E-02
     278 1S   67   PRO  HD1     3   0.900000E-01   1.00800           0   0.00000     -0.301140E-02
     279 1S   67   PRO  HD2     3   0.900000E-01   1.00800           0   0.00000     -0.301140E-02
     280 1S   67   PRO  CA     29   0.200000E-01   12.0110           0   0.00000     -0.301140E-02
     281 1S   67   PRO  HA      6   0.900000E-01   1.00800           0   0.00000     -0.301140E-02
     282 1S   67   PRO  CB     30  -0.180000       12.0110           0   0.00000     -0.301140E-02
     283 1S   67   PRO  HB1     3   0.900000E-01   1.00800           0   0.00000     -0.301140E-02
     284 1S   67   PRO  HB2     3   0.900000E-01   1.00800           0   0.00000     -0.301140E-02
     285 1S   67   PRO  CG     30  -0.180000       12.0110           0   0.00000     -0.301140E-02
     286 1S   67   PRO  HG1     3   0.900000E-01   1.00800           0   0.00000     -0.301140E-02
     287 1S   67   PRO  HG2     3   0.900000E-01   1.00800           0   0.00000     -0.301140E-02
     288 1S   67   PRO  C      20   0.510000       12.0110           0   0.00000     -0.301140E-02
     289 1S   67   PRO  O      70  -0.510000       15.9990           0   0.00000     -0.301140E-02
     290 1S   68   ARG  N      54  -0.470000       14.0070           0   0.00000     -0.301140E-02
     291 1S   68   ARG  HN      1   0.310000       1.00800           0   0.00000     -0.301140E-02
     292 1S   68   ARG  CA     22   0.700000E-01   12.0110           0   0.00000     -0.301140E-02
     293 1S   68   ARG  HA      6   0.900000E-01   1.00800           0   0.00000     -0.301140E-02
     294 1S   68   ARG  CB     23  -0.180000       12.0110           0   0.00000     -0.301140E-02
     295 1S   68   ARG  HB1     3   0.900000E-01   1.00800           0   0.00000     -0.301140E-02
     296 1S   68   ARG  HB2     3   0.900000E-01   1.00800           0   0.00000     -0.301140E-02
     297 1S   68   ARG  CG     23  -0.180000       12.0110           0   0.00000     -0.301140E-02
     298 1S   68   ARG  HG1     3   0.900000E-01   1.00800           0   0.00000     -0.301140E-02
     299 1S   68   ARG  HG2     3   0.900000E-01   1.00800           0   0.00000     -0.301140E-02
     300 1S   68   ARG  CD     23   0.200000       12.0110           0   0.00000     -0.301140E-02
     301 1S   68   ARG  HD1     3   0.900000E-01   1.00800           0   0.00000     -0.301140E-02
     302 1S   68   ARG  HD2     3   0.900000E-01   1.00800           0   0.00000     -0.301140E-02
     303 1S   68   ARG  NE     57  -0.700000       14.0070           0   0.00000     -0.301140E-02
     304 1S   68   ARG  HE      2   0.440000       1.00800           0   0.00000     -0.301140E-02
     305 1S   68   ARG  CZ     20   0.640000       12.0110           0   0.00000     -0.301140E-02
     306 1S   68   ARG  NH1    57  -0.800000       14.0070           0   0.00000     -0.301140E-02
     307 1S   68   ARG  HH11    2   0.460000       1.00800           0   0.00000     -0.301140E-02
     308 1S   68   ARG  HH12    2   0.460000       1.00800           0   0.00000     -0.301140E-02
     309 1S   68   ARG  NH2    57  -0.800000       14.0070           0   0.00000     -0.301140E-02
     310 1S   68   ARG  HH21    2   0.460000       1.00800           0   0.00000     -0.301140E-02
     311 1S   68   ARG  HH22    2   0.460000       1.00800           0   0.00000     -0.301140E-02
     312 1S   68   ARG  C      20   0.510000       12.0110           0   0.00000     -0.301140E-02
     313 1S   68   ARG  O      70  -0.510000       15.9990           0   0.00000     -0.301140E-02
     314 1S   69   GLY  N      54  -0.470000       14.0070           0   0.00000     -0.301140E-02
     315 1S   69   GLY  HN      1   0.310000       1.00800           0   0.00000     -0.301140E-02
     316 1S   69   GLY  CA     23  -0.200000E-01   12.0110           0   0.00000     -0.301140E-02
     317 1S   69   GLY  HA1     6   0.900000E-01   1.00800           0   0.00000     -0.301140E-02
     318 1S   69   GLY  HA2     6   0.900000E-01   1.00800           0   0.00000     -0.301140E-02
     319 1S   69   GLY  C      20   0.510000       12.0110           0   0.00000     -0.301140E-02
     320 1S   69   GLY  O      70  -0.510000       15.9990           0   0.00000     -0.301140E-02
     321 1S   70   GLN  N      54  -0.470000       14.0070           0   0.00000     -0.301140E-02
     322 1S   70   GLN  HN      1   0.310000       1.00800           0   0.00000     -0.301140E-02
     323 1S   70   GLN  CA     22   0.700000E-01   12.0110           0   0.00000     -0.301140E-02
     324 1S   70   GLN  HA      6   0.900000E-01   1.00800           0   0.00000     -0.301140E-02
     325 1S   70   GLN  CB     23  -0.180000       12.0110           0   0.00000     -0.301140E-02
     326 1S   70   GLN  HB1     3   0.900000E-01   1.00800           0   0.00000     -0.301140E-02
     327 1S   70   GLN  HB2     3   0.900000E-01   1.00800           0   0.00000     -0.301140E-02
     328 1S   70   GLN  CG     23  -0.180000       12.0110           0   0.00000     -0.301140E-02
     329 1S   70   GLN  HG1     3   0.900000E-01   1.00800           0   0.00000     -0.301140E-02
     330 1S   70   GLN  HG2     3   0.900000E-01   1.00800           0   0.00000     -0.301140E-02
     331 1S   70   GLN  CD     32   0.550000       12.0110           0   0.00000     -0.301140E-02
     332 1S   70   GLN  OE1    70  -0.550000       15.9990           0   0.00000     -0.301140E-02
     333 1S   70   GLN  NE2    55  -0.620000       14.0070           0   0.00000     -0.301140E-02
     334 1S   70   GLN  HE21    1   0.320000       1.00800           0   0.00000     -0.301140E-02
     335 1S   70   GLN  HE22    1   0.300000       1.00800           0   0.00000     -0.301140E-02
     336 1S   70   GLN  C      20   0.510000       12.0110           0   0.00000     -0.301140E-02
     337 1S   70   GLN  O      70  -0.510000       15.9990           0   0.00000     -0.301140E-02
     338 1S   71   GLY  N      54  -0.470000       14.0070           0   0.00000     -0.301140E-02
     339 1S   71   GLY  HN      1   0.310000       1.00800           0   0.00000     -0.301140E-02
     340 1S   71   GLY  CA     23  -0.200000E-01   12.0110           0   0.00000     -0.301140E-02
     341 1S   71   GLY  HA1     6   0.900000E-01   1.00800           0   0.00000     -0.301140E-02
     342 1S   71   GLY  HA2     6   0.900000E-01   1.00800           0   0.00000     -0.301140E-02
     343 1S   71   GLY  C      20   0.510000       12.0110           0   0.00000     -0.301140E-02
     344 1S   71   GLY  O      70  -0.510000       15.9990           0   0.00000     -0.301140E-02
     345 1S   72   VAL  N      54  -0.470000       14.0070           0   0.00000     -0.301140E-02
     346 1S   72   VAL  HN      1   0.310000       1.00800           0   0.00000     -0.301140E-02
     347 1S   72   VAL  CA     22   0.700000E-01   12.0110           0   0.00000     -0.301140E-02
     348 1S   72   VAL  HA      6   0.900000E-01   1.00800           0   0.00000     -0.301140E-02
     349 1S   72   VAL  CB     22  -0.900000E-01   12.0110           0   0.00000     -0.301140E-02
     350 1S   72   VAL  HB      3   0.900000E-01   1.00800           0   0.00000     -0.301140E-02
     351 1S   72   VAL  CG1    24  -0.270000       12.0110           0   0.00000     -0.301140E-02
     352 1S   72   VAL  HG11    3   0.900000E-01   1.00800           0   0.00000     -0.301140E-02
     353 1S   72   VAL  HG12    3   0.900000E-01   1.00800           0   0.00000     -0.301140E-02
     354 1S   72   VAL  HG13    3   0.900000E-01   1.00800           0   0.00000     -0.301140E-02
     355 1S   72   VAL  CG2    24  -0.270000       12.0110           0   0.00000     -0.301140E-02
     356 1S   72   VAL  HG21    3   0.900000E-01   1.00800           0   0.00000     -0.301140E-02
     357 1S   72   VAL  HG22    3   0.900000E-01   1.00800           0   0.00000     -0.301140E-02
     358 1S   72   VAL  HG23    3   0.900000E-01   1.00800           0   0.00000     -0.301140E-02
     359 1S   72   VAL  C      20   0.510000       12.0110           0   0.00000     -0.301140E-02
     360 1S   72   VAL  O      70  -0.510000       15.9990           0   0.00000     -0.301140E-02
     361 1S   73   PRO  N      50  -0.290000       14.0070           0   0.00000     -0.301140E-02
     362 1S   73   PRO  CD     31    0.00000       12.0110           0   0.00000     -0.301140E-02
     363 1S   73   PRO  HD1     3   0.900000E-01   1.00800           0   0.00000     -0.301140E-02
     364 1S   73   PRO  HD2     3   0.900000E-01   1.00800           0   0.00000     -0.301140E-02
     365 1S   73   PRO  CA     29   0.200000E-01   12.0110           0   0.00000     -0.301140E-02
     366 1S   73   PRO  HA      6   0.900000E-01   1.00800           0   0.00000     -0.301140E-02
     367 1S   73   PRO  CB     30  -0.180000       12.0110           0   0.00000     -0.301140E-02
     368 1S   73   PRO  HB1     3   0.900000E-01   1.00800           0   0.00000     -0.301140E-02
     369 1S   73   PRO  HB2     3   0.900000E-01   1.00800           0   0.00000     -0.301140E-02
     370 1S   73   PRO  CG     30  -0.180000       12.0110           0   0.00000     -0.301140E-02
     371 1S   73   PRO  HG1     3   0.900000E-01   1.00800           0   0.00000     -0.301140E-02
     372 1S   73   PRO  HG2     3   0.900000E-01   1.00800           0   0.00000     -0.301140E-02
     373 1S   73   PRO  C      20   0.510000       12.0110           0   0.00000     -0.301140E-02
     374 1S   73   PRO  O      70  -0.510000       15.9990           0   0.00000     -0.301140E-02
     375 1S   74   ILE  N      54  -0.470000       14.0070           0   0.00000     -0.301140E-02
     376 1S   74   ILE  HN      1   0.310000       1.00800           0   0.00000     -0.301140E-02
     377 1S   74   ILE  CA     22   0.700000E-01   12.0110           0   0.00000     -0.301140E-02
     378 1S   74   ILE  HA      6   0.900000E-01   1.00800           0   0.00000     -0.301140E-02
     379 1S   74   ILE  CB     22  -0.900000E-01   12.0110           0   0.00000     -0.301140E-02
     380 1S   74   ILE  HB      3   0.900000E-01   1.00800           0   0.00000     -0.301140E-02
     381 1S   74   ILE  CG2    24  -0.270000       12.0110           0   0.00000     -0.301140E-02
     382 1S   74   ILE  HG21    3   0.900000E-01   1.00800           0   0.00000     -0.301140E-02
     383 1S   74   ILE  HG22    3   0.900000E-01   1.00800           0   0.00000     -0.301140E-02
     384 1S   74   ILE  HG23    3   0.900000E-01   1.00800           0   0.00000     -0.301140E-02
     385 1S   74   ILE  CG1    23  -0.180000       12.0110           0   0.00000     -0.301140E-02
     386 1S   74   ILE  HG11    3   0.900000E-01   1.00800           0   0.00000     -0.301140E-02
     387 1S   74   ILE  HG12    3   0.900000E-01   1.00800           0   0.00000     -0.301140E-02
     388 1S   74   ILE  CD     24  -0.270000       12.0110           0   0.00000     -0.301140E-02
     389 1S   74   ILE  HD1     3   0.900000E-01   1.00800           0   0.00000     -0.301140E-02
     390 1S   74   ILE  HD2     3   0.900000E-01   1.00800           0   0.00000     -0.301140E-02
     391 1S   74   ILE  HD3     3   0.900000E-01   1.00800           0   0.00000     -0.301140E-02
     392 1S   74   ILE  C      20   0.510000       12.0110           0   0.00000     -0.301140E-02
     393 1S   74   ILE  O      70  -0.510000       15.9990           0   0.00000     -0.301140E-02
     394 1S   75   ASN  N      54  -0.470000       14.0070           0   0.00000     -0.301140E-02
     395 1S   75   ASN  HN      1   0.310000       1.00800           0   0.00000     -0.301140E-02
     396 1S   75   ASN  CA     22   0.700000E-01   12.0110           0   0.00000     -0.301140E-02
     397 1S   75   ASN  HA      6   0.900000E-01   1.00800           0   0.00000     -0.301140E-02
     398 1S   75   ASN  CB     23  -0.180000       12.0110           0   0.00000     -0.301140E-02
     399 1S   75   ASN  HB1     3   0.900000E-01   1.00800           0   0.00000     -0.301140E-02
     400 1S   75   ASN  HB2     3   0.900000E-01   1.00800           0   0.00000     -0.301140E-02
     401 1S   75   ASN  CG     32   0.550000       12.0110           0   0.00000     -0.301140E-02
     402 1S   75   ASN  OD1    70  -0.550000       15.9990           0   0.00000     -0.301140E-02
     403 1S   75   ASN  ND2    55  -0.620000       14.0070           0   0.00000     -0.301140E-02
     404 1S   75   ASN  HD21    1   0.320000       1.00800           0   0.00000     -0.301140E-02
     405 1S   75   ASN  HD22    1   0.300000       1.00800           0   0.00000     -0.301140E-02
     406 1S   75   ASN  C      20   0.510000       12.0110           0   0.00000     -0.301140E-02
     407 1S   75   ASN  O      70  -0.510000       15.9990           0   0.00000     -0.301140E-02
     408 1S   76   THR  N      54  -0.470000       14.0070           0   0.00000     -0.301140E-02
     409 1S   76   THR  HN      1   0.310000       1.00800           0   0.00000     -0.301140E-02
     410 1S   76   THR  CA     22   0.700000E-01   12.0110           0   0.00000     -0.301140E-02
     411 1S   76   THR  HA      6   0.900000E-01   1.00800           0   0.00000     -0.301140E-02
     412 1S   76   THR  CB     22   0.140000       12.0110           0   0.00000     -0.301140E-02
     413 1S   76   THR  HB      3   0.900000E-01   1.00800           0   0.00000     -0.301140E-02
     414 1S   76   THR  OG1    73  -0.660000       15.9990           0   0.00000     -0.301140E-02
     415 1S   76   THR  HG1     1   0.430000       1.00800           0   0.00000     -0.301140E-02
     416 1S   76   THR  CG2    24  -0.270000       12.0110           0   0.00000     -0.301140E-02
     417 1S   76   THR  HG21    3   0.900000E-01   1.00800           0   0.00000     -0.301140E-02
     418 1S   76   THR  HG22    3   0.900000E-01   1.00800           0   0.00000     -0.301140E-02
     419 1S   76   THR  HG23    3   0.900000E-01   1.00800           0   0.00000     -0.301140E-02
     420 1S   76   THR  C      20   0.510000       12.0110           0   0.00000     -0.301140E-02
     421 1S   76   THR  O      70  -0.510000       15.9990           0   0.00000     -0.301140E-02
     422 1S   77   ASN  N      54  -0.470000       14.0070           0   0.00000     -0.301140E-02
     423 1S   77   ASN  HN      1   0.310000       1.00800           0   0.00000     -0.301140E-02
     424 1S   77   ASN  CA     22   0.700000E-01   12.0110           0   0.00000     -0.301140E-02
     425 1S   77   ASN  HA      6   0.900000E-01   1.00800           0   0.00000     -0.301140E-02
     426 1S   77   ASN  CB     23  -0.180000       12.0110           0   0.00000     -0.301140E-02
     427 1S   77   ASN  HB1     3   0.900000E-01   1.00800           0   0.00000     -0.301140E-02
     428 1S   77   ASN  HB2     3   0.900000E-01   1.00800           0   0.00000     -0.301140E-02
     429 1S   77   ASN  CG     32   0.550000       12.0110           0   0.00000     -0.301140E-02
     430 1S   77   ASN  OD1    70  -0.550000       15.9990           0   0.00000     -0.301140E-02
     431 1S   77   ASN  ND2    55  -0.620000       14.0070           0   0.00000     -0.301140E-02
     432 1S   77   ASN  HD21    1   0.320000       1.00800           0   0.00000     -0.301140E-02
     433 1S   77   ASN  HD22    1   0.300000       1.00800           0   0.00000     -0.301140E-02
     434 1S   77   ASN  C      20   0.510000       12.0110           0   0.00000     -0.301140E-02
     435 1S   77   ASN  O      70  -0.510000       15.9990           0   0.00000     -0.301140E-02
     436 1S   78   SER  N      54  -0.470000       14.0070           0   0.00000     -0.301140E-02
     437 1S   78   SER  HN      1   0.310000       1.00800           0   0.00000     -0.301140E-02
     438 1S   78   SER  CA     22   0.700000E-01   12.0110           0   0.00000     -0.301140E-02
     439 1S   78   SER  HA      6   0.900000E-01   1.00800           0   0.00000     -0.301140E-02
     440 1S   78   SER  CB     23   0.500000E-01   12.0110           0   0.00000     -0.301140E-02
     441 1S   78   SER  HB1     3   0.900000E-01   1.00800           0   0.00000     -0.301140E-02
     442 1S   78   SER  HB2     3   0.900000E-01   1.00800           0   0.00000     -0.301140E-02
     443 1S   78   SER  OG     73  -0.660000       15.9990           0   0.00000     -0.301140E-02
     444 1S   78   SER  HG1     1   0.430000       1.00800           0   0.00000     -0.301140E-02
     445 1S   78   SER  C      20   0.510000       12.0110           0   0.00000     -0.301140E-02
     446 1S   78   SER  O      70  -0.510000       15.9990           0   0.00000     -0.301140E-02
     447 1S   79   SER  N      54  -0.470000       14.0070           0   0.00000     -0.301140E-02
     448 1S   79   SER  HN      1   0.310000       1.00800           0   0.00000     -0.301140E-02
     449 1S   79   SER  CA     22   0.700000E-01   12.0110           0   0.00000     -0.301140E-02
     450 1S   79   SER  HA      6   0.900000E-01   1.00800           0   0.00000     -0.301140E-02
     451 1S   79   SER  CB     23   0.500000E-01   12.0110           0   0.00000     -0.301140E-02
     452 1S   79   SER  HB1     3   0.900000E-01   1.00800           0   0.00000     -0.301140E-02
     453 1S   79   SER  HB2     3   0.900000E-01   1.00800           0   0.00000     -0.301140E-02
     454 1S   79   SER  OG     73  -0.660000       15.9990           0   0.00000     -0.301140E-02
     455 1S   79   SER  HG1     1   0.430000       1.00800           0   0.00000     -0.301140E-02
     456 1S   79   SER  C      20   0.510000       12.0110           0   0.00000     -0.301140E-02
     457 1S   79   SER  O      70  -0.510000       15.9990           0   0.00000     -0.301140E-02
     458 1S   80   PRO  N      50  -0.290000       14.0070           0   0.00000     -0.301140E-02
     459 1S   80   PRO  CD     31    0.00000       12.0110           0   0.00000     -0.301140E-02
     460 1S   80   PRO  HD1     3   0.900000E-01   1.00800           0   0.00000     -0.301140E-02
     461 1S   80   PRO  HD2     3   0.900000E-01   1.00800           0   0.00000     -0.301140E-02
     462 1S   80   PRO  CA     29   0.200000E-01   12.0110           0   0.00000     -0.301140E-02
     463 1S   80   PRO  HA      6   0.900000E-01   1.00800           0   0.00000     -0.301140E-02
     464 1S   80   PRO  CB     30  -0.180000       12.0110           0   0.00000     -0.301140E-02
     465 1S   80   PRO  HB1     3   0.900000E-01   1.00800           0   0.00000     -0.301140E-02
     466 1S   80   PRO  HB2     3   0.900000E-01   1.00800           0   0.00000     -0.301140E-02
     467 1S   80   PRO  CG     30  -0.180000       12.0110           0   0.00000     -0.301140E-02
     468 1S   80   PRO  HG1     3   0.900000E-01   1.00800           0   0.00000     -0.301140E-02
     469 1S   80   PRO  HG2     3   0.900000E-01   1.00800           0   0.00000     -0.301140E-02
     470 1S   80   PRO  C      20   0.510000       12.0110           0   0.00000     -0.301140E-02
     471 1S   80   PRO  O      70  -0.510000       15.9990           0   0.00000     -0.301140E-02
     472 1S   81   ASP  N      54  -0.470000       14.0070           0   0.00000     -0.301140E-02
     473 1S   81   ASP  HN      1   0.310000       1.00800           0   0.00000     -0.301140E-02
     474 1S   81   ASP  CA     22   0.700000E-01   12.0110           0   0.00000     -0.301140E-02
     475 1S   81   ASP  HA      6   0.900000E-01   1.00800           0   0.00000     -0.301140E-02
     476 1S   81   ASP  CB     23  -0.280000       12.0110           0   0.00000     -0.301140E-02
     477 1S   81   ASP  HB1     3   0.900000E-01   1.00800           0   0.00000     -0.301140E-02
     478 1S   81   ASP  HB2     3   0.900000E-01   1.00800           0   0.00000     -0.301140E-02
     479 1S   81   ASP  CG     32   0.620000       12.0110           0   0.00000     -0.301140E-02
     480 1S   81   ASP  OD1    72  -0.760000       15.9990           0   0.00000     -0.301140E-02
     481 1S   81   ASP  OD2    72  -0.760000       15.9990           0   0.00000     -0.301140E-02
     482 1S   81   ASP  C      20   0.510000       12.0110           0   0.00000     -0.301140E-02
     483 1S   81   ASP  O      70  -0.510000       15.9990           0   0.00000     -0.301140E-02
     484 1S   82   ASP  N      54  -0.470000       14.0070           0   0.00000     -0.301140E-02
     485 1S   82   ASP  HN      1   0.310000       1.00800           0   0.00000     -0.301140E-02
     486 1S   82   ASP  CA     22   0.700000E-01   12.0110           0   0.00000     -0.301140E-02
     487 1S   82   ASP  HA      6   0.900000E-01   1.00800           0   0.00000     -0.301140E-02
     488 1S   82   ASP  CB     23  -0.280000       12.0110           0   0.00000     -0.301140E-02
     489 1S   82   ASP  HB1     3   0.900000E-01   1.00800           0   0.00000     -0.301140E-02
     490 1S   82   ASP  HB2     3   0.900000E-01   1.00800           0   0.00000     -0.301140E-02
     491 1S   82   ASP  CG     32   0.620000       12.0110           0   0.00000     -0.301140E-02
     492 1S   82   ASP  OD1    72  -0.760000       15.9990           0   0.00000     -0.301140E-02
     493 1S   82   ASP  OD2    72  -0.760000       15.9990           0   0.00000     -0.301140E-02
     494 1S   82   ASP  C      20   0.510000       12.0110           0   0.00000     -0.301140E-02
     495 1S   82   ASP  O      70  -0.510000       15.9990           0   0.00000     -0.301140E-02
     496 1S   83   GLN  N      54  -0.470000       14.0070           0   0.00000     -0.301140E-02
     497 1S   83   GLN  HN      1   0.310000       1.00800           0   0.00000     -0.301140E-02
     498 1S   83   GLN  CA     22   0.700000E-01   12.0110           0   0.00000     -0.301140E-02
     499 1S   83   GLN  HA      6   0.900000E-01   1.00800           0   0.00000     -0.301140E-02
     500 1S   83   GLN  CB     23  -0.180000       12.0110           0   0.00000     -0.301140E-02
     501 1S   83   GLN  HB1     3   0.900000E-01   1.00800           0   0.00000     -0.301140E-02
     502 1S   83   GLN  HB2     3   0.900000E-01   1.00800           0   0.00000     -0.301140E-02
     503 1S   83   GLN  CG     23  -0.180000       12.0110           0   0.00000     -0.301140E-02
     504 1S   83   GLN  HG1     3   0.900000E-01   1.00800           0   0.00000     -0.301140E-02
     505 1S   83   GLN  HG2     3   0.900000E-01   1.00800           0   0.00000     -0.301140E-02
     506 1S   83   GLN  CD     32   0.550000       12.0110           0   0.00000     -0.301140E-02
     507 1S   83   GLN  OE1    70  -0.550000       15.9990           0   0.00000     -0.301140E-02
     508 1S   83   GLN  NE2    55  -0.620000       14.0070           0   0.00000     -0.301140E-02
     509 1S   83   GLN  HE21    1   0.320000       1.00800           0   0.00000     -0.301140E-02
     510 1S   83   GLN  HE22    1   0.300000       1.00800           0   0.00000     -0.301140E-02
     511 1S   83   GLN  C      20   0.510000       12.0110           0   0.00000     -0.301140E-02
     512 1S   83   GLN  O      70  -0.510000       15.9990           0   0.00000     -0.301140E-02
     513 1S   84   ILE  N      54  -0.470000       14.0070           0   0.00000     -0.301140E-02
     514 1S   84   ILE  HN      1   0.310000       1.00800           0   0.00000     -0.301140E-02
     515 1S   84   ILE  CA     22   0.700000E-01   12.0110           0   0.00000     -0.301140E-02
     516 1S   84   ILE  HA      6   0.900000E-01   1.00800           0   0.00000     -0.301140E-02
     517 1S   84   ILE  CB     22  -0.900000E-01   12.0110           0   0.00000     -0.301140E-02
     518 1S   84   ILE  HB      3   0.900000E-01   1.00800           0   0.00000     -0.301140E-02
     519 1S   84   ILE  CG2    24  -0.270000       12.0110           0   0.00000     -0.301140E-02
     520 1S   84   ILE  HG21    3   0.900000E-01   1.00800           0   0.00000     -0.301140E-02
     521 1S   84   ILE  HG22    3   0.900000E-01   1.00800           0   0.00000     -0.301140E-02
     522 1S   84   ILE  HG23    3   0.900000E-01   1.00800           0   0.00000     -0.301140E-02
     523 1S   84   ILE  CG1    23  -0.180000       12.0110           0   0.00000     -0.301140E-02
     524 1S   84   ILE  HG11    3   0.900000E-01   1.00800           0   0.00000     -0.301140E-02
     525 1S   84   ILE  HG12    3   0.900000E-01   1.00800           0   0.00000     -0.301140E-02
     526 1S   84   ILE  CD     24  -0.270000       12.0110           0   0.00000     -0.301140E-02
     527 1S   84   ILE  HD1     3   0.900000E-01   1.00800           0   0.00000     -0.301140E-02
     528 1S   84   ILE  HD2     3   0.900000E-01   1.00800           0   0.00000     -0.301140E-02
     529 1S   84   ILE  HD3     3   0.900000E-01   1.00800           0   0.00000     -0.301140E-02
     530 1S   84   ILE  C      20   0.510000       12.0110           0   0.00000     -0.301140E-02
     531 1S   84   ILE  O      70  -0.510000       15.9990           0   0.00000     -0.301140E-02
     532 1S   85   GLY  N      54  -0.470000       14.0070           0   0.00000     -0.301140E-02
     533 1S   85   GLY  HN      1   0.310000       1.00800           0   0.00000     -0.301140E-02
     534 1S   85   GLY  CA     23  -0.200000E-01   12.0110           0   0.00000     -0.301140E-02
     535 1S   85   GLY  HA1     6   0.900000E-01   1.00800           0   0.00000     -0.301140E-02
     536 1S   85   GLY  HA2     6   0.900000E-01   1.00800           0   0.00000     -0.301140E-02
     537 1S   85   GLY  C      20   0.510000       12.0110           0   0.00000     -0.301140E-02
     538 1S   85   GLY  O      70  -0.510000       15.9990           0   0.00000     -0.301140E-02
     539 1S   86   TYR  N      54  -0.470000       14.0070           0   0.00000     -0.301140E-02
     540 1S   86   TYR  HN      1   0.310000       1.00800           0   0.00000     -0.301140E-02
     541 1S   86   TYR  CA     22   0.700000E-01   12.0110           0   0.00000     -0.301140E-02
     542 1S   86   TYR  HA      6   0.900000E-01   1.00800           0   0.00000     -0.301140E-02
     543 1S   86   TYR  CB     23  -0.180000       12.0110           0   0.00000     -0.301140E-02
     544 1S   86   TYR  HB1     3   0.900000E-01   1.00800           0   0.00000     -0.301140E-02
     545 1S   86   TYR  HB2     3   0.900000E-01   1.00800           0   0.00000     -0.301140E-02
     546 1S   86   TYR  CG     21    0.00000       12.0110           0   0.00000     -0.301140E-02
     547 1S   86   TYR  CD1    21  -0.115000       12.0110           0   0.00000     -0.301140E-02
     548 1S   86   TYR  HD1     5   0.115000       1.00800           0   0.00000     -0.301140E-02
     549 1S   86   TYR  CE1    21  -0.115000       12.0110           0   0.00000     -0.301140E-02
     550 1S   86   TYR  HE1     5   0.115000       1.00800           0   0.00000     -0.301140E-02
     551 1S   86   TYR  CZ     21   0.110000       12.0110           0   0.00000     -0.301140E-02
     552 1S   86   TYR  OH     73  -0.540000       15.9990           0   0.00000     -0.301140E-02
     553 1S   86   TYR  HH      1   0.430000       1.00800           0   0.00000     -0.301140E-02
     554 1S   86   TYR  CD2    21  -0.115000       12.0110           0   0.00000     -0.301140E-02
     555 1S   86   TYR  HD2     5   0.115000       1.00800           0   0.00000     -0.301140E-02
     556 1S   86   TYR  CE2    21  -0.115000       12.0110           0   0.00000     -0.301140E-02
     557 1S   86   TYR  HE2     5   0.115000       1.00800           0   0.00000     -0.301140E-02
     558 1S   86   TYR  C      20   0.510000       12.0110           0   0.00000     -0.301140E-02
     559 1S   86   TYR  O      70  -0.510000       15.9990           0   0.00000     -0.301140E-02
     560 1S   87   TYR  N      54  -0.470000       14.0070           0   0.00000     -0.301140E-02
     561 1S   87   TYR  HN      1   0.310000       1.00800           0   0.00000     -0.301140E-02
     562 1S   87   TYR  CA     22   0.700000E-01   12.0110           0   0.00000     -0.301140E-02
     563 1S   87   TYR  HA      6   0.900000E-01   1.00800           0   0.00000     -0.301140E-02
     564 1S   87   TYR  CB     23  -0.180000       12.0110           0   0.00000     -0.301140E-02
     565 1S   87   TYR  HB1     3   0.900000E-01   1.00800           0   0.00000     -0.301140E-02
     566 1S   87   TYR  HB2     3   0.900000E-01   1.00800           0   0.00000     -0.301140E-02
     567 1S   87   TYR  CG     21    0.00000       12.0110           0   0.00000     -0.301140E-02
     568 1S   87   TYR  CD1    21  -0.115000       12.0110           0   0.00000     -0.301140E-02
     569 1S   87   TYR  HD1     5   0.115000       1.00800           0   0.00000     -0.301140E-02
     570 1S   87   TYR  CE1    21  -0.115000       12.0110           0   0.00000     -0.301140E-02
     571 1S   87   TYR  HE1     5   0.115000       1.00800           0   0.00000     -0.301140E-02
     572 1S   87   TYR  CZ     21   0.110000       12.0110           0   0.00000     -0.301140E-02
     573 1S   87   TYR  OH     73  -0.540000       15.9990           0   0.00000     -0.301140E-02
     574 1S   87   TYR  HH      1   0.430000       1.00800           0   0.00000     -0.301140E-02
     575 1S   87   TYR  CD2    21  -0.115000       12.0110           0   0.00000     -0.301140E-02
     576 1S   87   TYR  HD2     5   0.115000       1.00800           0   0.00000     -0.301140E-02
     577 1S   87   TYR  CE2    21  -0.115000       12.0110           0   0.00000     -0.301140E-02
     578 1S   87   TYR  HE2     5   0.115000       1.00800           0   0.00000     -0.301140E-02
     579 1S   87   TYR  C      20   0.510000       12.0110           0   0.00000     -0.301140E-02
     580 1S   87   TYR  O      70  -0.510000       15.9990           0   0.00000     -0.301140E-02
     581 1S   88   ARG  N      54  -0.470000       14.0070           0   0.00000     -0.301140E-02
     582 1S   88   ARG  HN      1   0.310000       1.00800           0   0.00000     -0.301140E-02
     583 1S   88   ARG  CA     22   0.700000E-01   12.0110           0   0.00000     -0.301140E-02
     584 1S   88   ARG  HA      6   0.900000E-01   1.00800           0   0.00000     -0.301140E-02
     585 1S   88   ARG  CB     23  -0.180000       12.0110           0   0.00000     -0.301140E-02
     586 1S   88   ARG  HB1     3   0.900000E-01   1.00800           0   0.00000     -0.301140E-02
     587 1S   88   ARG  HB2     3   0.900000E-01   1.00800           0   0.00000     -0.301140E-02
     588 1S   88   ARG  CG     23  -0.180000       12.0110           0   0.00000     -0.301140E-02
     589 1S   88   ARG  HG1     3   0.900000E-01   1.00800           0   0.00000     -0.301140E-02
     590 1S   88   ARG  HG2     3   0.900000E-01   1.00800           0   0.00000     -0.301140E-02
     591 1S   88   ARG  CD     23   0.200000       12.0110           0   0.00000     -0.301140E-02
     592 1S   88   ARG  HD1     3   0.900000E-01   1.00800           0   0.00000     -0.301140E-02
     593 1S   88   ARG  HD2     3   0.900000E-01   1.00800           0   0.00000     -0.301140E-02
     594 1S   88   ARG  NE     57  -0.700000       14.0070           0   0.00000     -0.301140E-02
     595 1S   88   ARG  HE      2   0.440000       1.00800           0   0.00000     -0.301140E-02
     596 1S   88   ARG  CZ     20   0.640000       12.0110           0   0.00000     -0.301140E-02
     597 1S   88   ARG  NH1    57  -0.800000       14.0070           0   0.00000     -0.301140E-02
     598 1S   88   ARG  HH11    2   0.460000       1.00800           0   0.00000     -0.301140E-02
     599 1S   88   ARG  HH12    2   0.460000       1.00800           0   0.00000     -0.301140E-02
     600 1S   88   ARG  NH2    57  -0.800000       14.0070           0   0.00000     -0.301140E-02
     601 1S   88   ARG  HH21    2   0.460000       1.00800           0   0.00000     -0.301140E-02
     602 1S   88   ARG  HH22    2   0.460000       1.00800           0   0.00000     -0.301140E-02
     603 1S   88   ARG  C      20   0.510000       12.0110           0   0.00000     -0.301140E-02
     604 1S   88   ARG  O      70  -0.510000       15.9990           0   0.00000     -0.301140E-02
     605 1S   89   ARG  N      54  -0.470000       14.0070           0   0.00000     -0.301140E-02
     606 1S   89   ARG  HN      1   0.310000       1.00800           0   0.00000     -0.301140E-02
     607 1S   89   ARG  CA     22   0.700000E-01   12.0110           0   0.00000     -0.301140E-02
     608 1S   89   ARG  HA      6   0.900000E-01   1.00800           0   0.00000     -0.301140E-02
     609 1S   89   ARG  CB     23  -0.180000       12.0110           0   0.00000     -0.301140E-02
     610 1S   89   ARG  HB1     3   0.900000E-01   1.00800           0   0.00000     -0.301140E-02
     611 1S   89   ARG  HB2     3   0.900000E-01   1.00800           0   0.00000     -0.301140E-02
     612 1S   89   ARG  CG     23  -0.180000       12.0110           0   0.00000     -0.301140E-02
     613 1S   89   ARG  HG1     3   0.900000E-01   1.00800           0   0.00000     -0.301140E-02
     614 1S   89   ARG  HG2     3   0.900000E-01   1.00800           0   0.00000     -0.301140E-02
     615 1S   89   ARG  CD     23   0.200000       12.0110           0   0.00000     -0.301140E-02
     616 1S   89   ARG  HD1     3   0.900000E-01   1.00800           0   0.00000     -0.301140E-02
     617 1S   89   ARG  HD2     3   0.900000E-01   1.00800           0   0.00000     -0.301140E-02
     618 1S   89   ARG  NE     57  -0.700000       14.0070           0   0.00000     -0.301140E-02
     619 1S   89   ARG  HE      2   0.440000       1.00800           0   0.00000     -0.301140E-02
     620 1S   89   ARG  CZ     20   0.640000       12.0110           0   0.00000     -0.301140E-02
     621 1S   89   ARG  NH1    57  -0.800000       14.0070           0   0.00000     -0.301140E-02
     622 1S   89   ARG  HH11    2   0.460000       1.00800           0   0.00000     -0.301140E-02
     623 1S   89   ARG  HH12    2   0.460000       1.00800           0   0.00000     -0.301140E-02
     624 1S   89   ARG  NH2    57  -0.800000       14.0070           0   0.00000     -0.301140E-02
     625 1S   89   ARG  HH21    2   0.460000       1.00800           0   0.00000     -0.301140E-02
     626 1S   89   ARG  HH22    2   0.460000       1.00800           0   0.00000     -0.301140E-02
     627 1S   89   ARG  C      20   0.510000       12.0110           0   0.00000     -0.301140E-02
     628 1S   89   ARG  O      70  -0.510000       15.9990           0   0.00000     -0.301140E-02
     629 1S   90   ALA  N      54  -0.470000       14.0070           0   0.00000     -0.301140E-02
     630 1S   90   ALA  HN      1   0.310000       1.00800           0   0.00000     -0.301140E-02
     631 1S   90   ALA  CA     22   0.700000E-01   12.0110           0   0.00000     -0.301140E-02
     632 1S   90   ALA  HA      6   0.900000E-01   1.00800           0   0.00000     -0.301140E-02
     633 1S   90   ALA  CB     24  -0.270000       12.0110           0   0.00000     -0.301140E-02
     634 1S   90   ALA  HB1     3   0.900000E-01   1.00800           0   0.00000     -0.301140E-02
     635 1S   90   ALA  HB2     3   0.900000E-01   1.00800           0   0.00000     -0.301140E-02
     636 1S   90   ALA  HB3     3   0.900000E-01   1.00800           0   0.00000     -0.301140E-02
     637 1S   90   ALA  C      32   0.340000       12.0110           0   0.00000     -0.301140E-02
     638 1S   90   ALA  OT1    72  -0.670000       15.9990           0   0.00000       0.00000    
     639 1S   90   ALA  OT2    72  -0.670000       15.9990           0   0.00000     -0.301140E-02
     640 2S   106  PRO  N      59  -0.700000E-01   14.0070           0   0.00000     -0.301140E-02
     641 2S   106  PRO  HN1     2   0.240000       1.00800           0   0.00000     -0.301140E-02
     642 2S   106  PRO  HN2     2   0.240000       1.00800           0   0.00000     -0.301140E-02
     643 2S   106  PRO  CD     31   0.160000       12.0110           0   0.00000     -0.301140E-02
     644 2S   106  PRO  HD1     3   0.900000E-01   1.00800           0   0.00000     -0.301140E-02
     645 2S   106  PRO  HD2     3   0.900000E-01   1.00800           0   0.00000     -0.301140E-02
     646 2S   106  PRO  CA     29   0.160000       12.0110           0   0.00000     -0.301140E-02
     647 2S   106  PRO  HA      6   0.900000E-01   1.00800           0   0.00000     -0.301140E-02
     648 2S   106  PRO  CB     30  -0.180000       12.0110           0   0.00000     -0.301140E-02
     649 2S   106  PRO  HB1     3   0.900000E-01   1.00800           0   0.00000     -0.301140E-02
     650 2S   106  PRO  HB2     3   0.900000E-01   1.00800           0   0.00000     -0.301140E-02
     651 2S   106  PRO  CG     30  -0.180000       12.0110           0   0.00000     -0.301140E-02
     652 2S   106  PRO  HG1     3   0.900000E-01   1.00800           0   0.00000     -0.301140E-02
     653 2S   106  PRO  HG2     3   0.900000E-01   1.00800           0   0.00000     -0.301140E-02
     654 2S   106  PRO  C      20   0.510000       12.0110           0   0.00000     -0.301140E-02
     655 2S   106  PRO  O      70  -0.510000       15.9990           0   0.00000     -0.301140E-02
     656 2S   107  ARG  N      54  -0.470000       14.0070           0   0.00000     -0.301140E-02
     657 2S   107  ARG  HN      1   0.310000       1.00800           0   0.00000     -0.301140E-02
     658 2S   107  ARG  CA     22   0.700000E-01   12.0110           0   0.00000     -0.301140E-02
     659 2S   107  ARG  HA      6   0.900000E-01   1.00800           0   0.00000     -0.301140E-02
     660 2S   107  ARG  CB     23  -0.180000       12.0110           0   0.00000     -0.301140E-02
     661 2S   107  ARG  HB1     3   0.900000E-01   1.00800           0   0.00000     -0.301140E-02
     662 2S   107  ARG  HB2     3   0.900000E-01   1.00800           0   0.00000     -0.301140E-02
     663 2S   107  ARG  CG     23  -0.180000       12.0110           0   0.00000     -0.301140E-02
     664 2S   107  ARG  HG1     3   0.900000E-01   1.00800           0   0.00000     -0.301140E-02
     665 2S   107  ARG  HG2     3   0.900000E-01   1.00800           0   0.00000     -0.301140E-02
     666 2S   107  ARG  CD     23   0.200000       12.0110           0   0.00000     -0.301140E-02
     667 2S   107  ARG  HD1     3   0.900000E-01   1.00800           0   0.00000     -0.301140E-02
     668 2S   107  ARG  HD2     3   0.900000E-01   1.00800           0   0.00000     -0.301140E-02
     669 2S   107  ARG  NE     57  -0.700000       14.0070           0   0.00000     -0.301140E-02
     670 2S   107  ARG  HE      2   0.440000       1.00800           0   0.00000     -0.301140E-02
     671 2S   107  ARG  CZ     20   0.640000       12.0110           0   0.00000     -0.301140E-02
     672 2S   107  ARG  NH1    57  -0.800000       14.0070           0   0.00000     -0.301140E-02
     673 2S   107  ARG  HH11    2   0.460000       1.00800           0   0.00000     -0.301140E-02
     674 2S   107  ARG  HH12    2   0.460000       1.00800           0   0.00000     -0.301140E-02
     675 2S   107  ARG  NH2    57  -0.800000       14.0070           0   0.00000     -0.301140E-02
     676 2S   107  ARG  HH21    2   0.460000       1.00800           0   0.00000     -0.301140E-02
     677 2S   107  ARG  HH22    2   0.460000       1.00800           0   0.00000     -0.301140E-02
     678 2S   107  ARG  C      20   0.510000       12.0110           0   0.00000     -0.301140E-02
     679 2S   107  ARG  O      70  -0.510000       15.9990           0   0.00000     -0.301140E-02
     680 2S   108  TRP  N      54  -0.470000       14.0070           0   0.00000     -0.301140E-02
     681 2S   108  TRP  HN      1   0.310000       1.00800           0   0.00000     -0.301140E-02
     682 2S   108  TRP  CA     22   0.700000E-01   12.0110           0   0.00000     -0.301140E-02
     683 2S   108  TRP  HA      6   0.900000E-01   1.00800           0   0.00000     -0.301140E-02
     684 2S   108  TRP  CB     23  -0.180000       12.0110           0   0.00000     -0.301140E-02
     685 2S   108  TRP  HB1     3   0.900000E-01   1.00800           0   0.00000     -0.301140E-02
     686 2S   108  TRP  HB2     3   0.900000E-01   1.00800           0   0.00000     -0.301140E-02
     687 2S   108  TRP  CG     28  -0.300000E-01   12.0110           0   0.00000     -0.301140E-02
     688 2S   108  TRP  CD1    21   0.350000E-01   12.0110           0   0.00000     -0.301140E-02
     689 2S   108  TRP  HD1     5   0.115000       1.00800           0   0.00000     -0.301140E-02
     690 2S   108  TRP  NE1    58  -0.610000       14.0070           0   0.00000     -0.301140E-02
     691 2S   108  TRP  HE1     1   0.380000       1.00800           0   0.00000     -0.301140E-02
     692 2S   108  TRP  CE2    27   0.130000       12.0110           0   0.00000     -0.301140E-02
     693 2S   108  TRP  CD2    27  -0.200000E-01   12.0110           0   0.00000     -0.301140E-02
     694 2S   108  TRP  CE3    21  -0.115000       12.0110           0   0.00000     -0.301140E-02
     695 2S   108  TRP  HE3     5   0.115000       1.00800           0   0.00000     -0.301140E-02
     696 2S   108  TRP  CZ3    21  -0.115000       12.0110           0   0.00000     -0.301140E-02
     697 2S   108  TRP  HZ3     5   0.115000       1.00800           0   0.00000     -0.301140E-02
     698 2S   108  TRP  CZ2    21  -0.115000       12.0110           0   0.00000     -0.301140E-02
     699 2S   108  TRP  HZ2     5   0.115000       1.00800           0   0.00000     -0.301140E-02
     700 2S   108  TRP  CH2    21  -0.115000       12.0110           0   0.00000     -0.301140E-02
     701 2S   108  TRP  HH2     5   0.115000       1.00800           0   0.00000     -0.301140E-02
     702 2S   108  TRP  C      20   0.510000       12.0110           0   0.00000     -0.301140E-02
     703 2S   108  TRP  O      70  -0.510000       15.9990           0   0.00000     -0.301140E-02
     704 2S   109  TYR  N      54  -0.470000       14.0070           0   0.00000     -0.301140E-02
     705 2S   109  TYR  HN      1   0.310000       1.00800           0   0.00000     -0.301140E-02
     706 2S   109  TYR  CA     22   0.700000E-01   12.0110           0   0.00000     -0.301140E-02
     707 2S   109  TYR  HA      6   0.900000E-01   1.00800           0   0.00000     -0.301140E-02
     708 2S   109  TYR  CB     23  -0.180000       12.0110           0   0.00000     -0.301140E-02
     709 2S   109  TYR  HB1     3   0.900000E-01   1.00800           0   0.00000     -0.301140E-02
     710 2S   109  TYR  HB2     3   0.900000E-01   1.00800           0   0.00000     -0.301140E-02
     711 2S   109  TYR  CG     21    0.00000       12.0110           0   0.00000     -0.301140E-02
     712 2S   109  TYR  CD1    21  -0.115000       12.0110           0   0.00000     -0.301140E-02
     713 2S   109  TYR  HD1     5   0.115000       1.00800           0   0.00000     -0.301140E-02
     714 2S   109  TYR  CE1    21  -0.115000       12.0110           0   0.00000     -0.301140E-02
     715 2S   109  TYR  HE1     5   0.115000       1.00800           0   0.00000     -0.301140E-02
     716 2S   109  TYR  CZ     21   0.110000       12.0110           0   0.00000     -0.301140E-02
     717 2S   109  TYR  OH     73  -0.540000       15.9990           0   0.00000     -0.301140E-02
     718 2S   109  TYR  HH      1   0.430000       1.00800           0   0.00000     -0.301140E-02
     719 2S   109  TYR  CD2    21  -0.115000       12.0110           0   0.00000     -0.301140E-02
     720 2S   109  TYR  HD2     5   0.115000       1.00800           0   0.00000     -0.301140E-02
     721 2S   109  TYR  CE2    21  -0.115000       12.0110           0   0.00000     -0.301140E-02
     722 2S   109  TYR  HE2     5   0.115000       1.00800           0   0.00000     -0.301140E-02
     723 2S   109  TYR  C      20   0.510000       12.0110           0   0.00000     -0.301140E-02
     724 2S   109  TYR  O      70  -0.510000       15.9990           0   0.00000     -0.301140E-02
     725 2S   110  PHE  N      54  -0.470000       14.0070           0   0.00000     -0.301140E-02
     726 2S   110  PHE  HN      1   0.310000       1.00800           0   0.00000     -0.301140E-02
     727 2S   110  PHE  CA     22   0.700000E-01   12.0110           0   0.00000     -0.301140E-02
     728 2S   110  PHE  HA      6   0.900000E-01   1.00800           0   0.00000     -0.301140E-02
     729 2S   110  PHE  CB     23  -0.180000       12.0110           0   0.00000     -0.301140E-02
     730 2S   110  PHE  HB1     3   0.900000E-01   1.00800           0   0.00000     -0.301140E-02
     731 2S   110  PHE  HB2     3   0.900000E-01   1.00800           0   0.00000     -0.301140E-02
     732 2S   110  PHE  CG     21    0.00000       12.0110           0   0.00000     -0.301140E-02
     733 2S   110  PHE  CD1    21  -0.115000       12.0110           0   0.00000     -0.301140E-02
     734 2S   110  PHE  HD1     5   0.115000       1.00800           0   0.00000     -0.301140E-02
     735 2S   110  PHE  CE1    21  -0.115000       12.0110           0   0.00000     -0.301140E-02
     736 2S   110  PHE  HE1     5   0.115000       1.00800           0   0.00000     -0.301140E-02
     737 2S   110  PHE  CZ     21  -0.115000       12.0110           0   0.00000     -0.301140E-02
     738 2S   110  PHE  HZ      5   0.115000       1.00800           0   0.00000     -0.301140E-02
     739 2S   110  PHE  CD2    21  -0.115000       12.0110           0   0.00000     -0.301140E-02
     740 2S   110  PHE  HD2     5   0.115000       1.00800           0   0.00000     -0.301140E-02
     741 2S   110  PHE  CE2    21  -0.115000       12.0110           0   0.00000     -0.301140E-02
     742 2S   110  PHE  HE2     5   0.115000       1.00800           0   0.00000     -0.301140E-02
     743 2S   110  PHE  C      20   0.510000       12.0110           0   0.00000     -0.301140E-02
     744 2S   110  PHE  O      70  -0.510000       15.9990           0   0.00000     -0.301140E-02
     745 2S   111  TYR  N      54  -0.470000       14.0070           0   0.00000     -0.301140E-02
     746 2S   111  TYR  HN      1   0.310000       1.00800           0   0.00000     -0.301140E-02
     747 2S   111  TYR  CA     22   0.700000E-01   12.0110           0   0.00000     -0.301140E-02
     748 2S   111  TYR  HA      6   0.900000E-01   1.00800           0   0.00000     -0.301140E-02
     749 2S   111  TYR  CB     23  -0.180000       12.0110           0   0.00000     -0.301140E-02
     750 2S   111  TYR  HB1     3   0.900000E-01   1.00800           0   0.00000     -0.301140E-02
     751 2S   111  TYR  HB2     3   0.900000E-01   1.00800           0   0.00000     -0.301140E-02
     752 2S   111  TYR  CG     21    0.00000       12.0110           0   0.00000     -0.301140E-02
     753 2S   111  TYR  CD1    21  -0.115000       12.0110           0   0.00000     -0.301140E-02
     754 2S   111  TYR  HD1     5   0.115000       1.00800           0   0.00000     -0.301140E-02
     755 2S   111  TYR  CE1    21  -0.115000       12.0110           0   0.00000     -0.301140E-02
     756 2S   111  TYR  HE1     5   0.115000       1.00800           0   0.00000     -0.301140E-02
     757 2S   111  TYR  CZ     21   0.110000       12.0110           0   0.00000     -0.301140E-02
     758 2S   111  TYR  OH     73  -0.540000       15.9990           0   0.00000     -0.301140E-02
     759 2S   111  TYR  HH      1   0.430000       1.00800           0   0.00000     -0.301140E-02
     760 2S   111  TYR  CD2    21  -0.115000       12.0110           0   0.00000     -0.301140E-02
     761 2S   111  TYR  HD2     5   0.115000       1.00800           0   0.00000     -0.301140E-02
     762 2S   111  TYR  CE2    21  -0.115000       12.0110           0   0.00000     -0.301140E-02
     763 2S   111  TYR  HE2     5   0.115000       1.00800           0   0.00000     -0.301140E-02
     764 2S   111  TYR  C      20   0.510000       12.0110           0   0.00000     -0.301140E-02
     765 2S   111  TYR  O      70  -0.510000       15.9990           0   0.00000     -0.301140E-02
     766 2S   112  TYR  N      54  -0.470000       14.0070           0   0.00000     -0.301140E-02
     767 2S   112  TYR  HN      1   0.310000       1.00800           0   0.00000     -0.301140E-02
     768 2S   112  TYR  CA     22   0.700000E-01   12.0110           0   0.00000     -0.301140E-02
     769 2S   112  TYR  HA      6   0.900000E-01   1.00800           0   0.00000     -0.301140E-02
     770 2S   112  TYR  CB     23  -0.180000       12.0110           0   0.00000     -0.301140E-02
     771 2S   112  TYR  HB1     3   0.900000E-01   1.00800           0   0.00000     -0.301140E-02
     772 2S   112  TYR  HB2     3   0.900000E-01   1.00800           0   0.00000     -0.301140E-02
     773 2S   112  TYR  CG     21    0.00000       12.0110           0   0.00000     -0.301140E-02
     774 2S   112  TYR  CD1    21  -0.115000       12.0110           0   0.00000     -0.301140E-02
     775 2S   112  TYR  HD1     5   0.115000       1.00800           0   0.00000     -0.301140E-02
     776 2S   112  TYR  CE1    21  -0.115000       12.0110           0   0.00000     -0.301140E-02
     777 2S   112  TYR  HE1     5   0.115000       1.00800           0   0.00000     -0.301140E-02
     778 2S   112  TYR  CZ     21   0.110000       12.0110           0   0.00000     -0.301140E-02
     779 2S   112  TYR  OH     73  -0.540000       15.9990           0   0.00000     -0.301140E-02
     780 2S   112  TYR  HH      1   0.430000       1.00800           0   0.00000     -0.301140E-02
     781 2S   112  TYR  CD2    21  -0.115000       12.0110           0   0.00000     -0.301140E-02
     782 2S   112  TYR  HD2     5   0.115000       1.00800           0   0.00000     -0.301140E-02
     783 2S   112  TYR  CE2    21  -0.115000       12.0110           0   0.00000     -0.301140E-02
     784 2S   112  TYR  HE2     5   0.115000       1.00800           0   0.00000     -0.301140E-02
     785 2S   112  TYR  C      20   0.510000       12.0110           0   0.00000     -0.301140E-02
     786 2S   112  TYR  O      70  -0.510000       15.9990           0   0.00000     -0.301140E-02
     787 2S   113  LEU  N      54  -0.470000       14.0070           0   0.00000     -0.301140E-02
     788 2S   113  LEU  HN      1   0.310000       1.00800           0   0.00000     -0.301140E-02
     789 2S   113  LEU  CA     22   0.700000E-01   12.0110           0   0.00000     -0.301140E-02
     790 2S   113  LEU  HA      6   0.900000E-01   1.00800           0   0.00000     -0.301140E-02
     791 2S   113  LEU  CB     23  -0.180000       12.0110           0   0.00000     -0.301140E-02
     792 2S   113  LEU  HB1     3   0.900000E-01   1.00800           0   0.00000     -0.301140E-02
     793 2S   113  LEU  HB2     3   0.900000E-01   1.00800           0   0.00000     -0.301140E-02
     794 2S   113  LEU  CG     22  -0.900000E-01   12.0110           0   0.00000     -0.301140E-02
     795 2S   113  LEU  HG      3   0.900000E-01   1.00800           0   0.00000     -0.301140E-02
     796 2S   113  LEU  CD1    24  -0.270000       12.0110           0   0.00000     -0.301140E-02
     797 2S   113  LEU  HD11    3   0.900000E-01   1.00800           0   0.00000     -0.301140E-02
     798 2S   113  LEU  HD12    3   0.900000E-01   1.00800           0   0.00000     -0.301140E-02
     799 2S   113  LEU  HD13    3   0.900000E-01   1.00800           0   0.00000     -0.301140E-02
     800 2S   113  LEU  CD2    24  -0.270000       12.0110           0   0.00000     -0.301140E-02
     801 2S   113  LEU  HD21    3   0.900000E-01   1.00800           0   0.00000     -0.301140E-02
     802 2S   113  LEU  HD22    3   0.900000E-01   1.00800           0   0.00000     -0.301140E-02
     803 2S   113  LEU  HD23    3   0.900000E-01   1.00800           0   0.00000     -0.301140E-02
     804 2S   113  LEU  C      20   0.510000       12.0110           0   0.00000     -0.301140E-02
     805 2S   113  LEU  O      70  -0.510000       15.9990           0   0.00000     -0.301140E-02
     806 2S   114  GLY  N      54  -0.470000       14.0070           0   0.00000     -0.301140E-02
     807 2S   114  GLY  HN      1   0.310000       1.00800           0   0.00000     -0.301140E-02
     808 2S   114  GLY  CA     23  -0.200000E-01   12.0110           0   0.00000     -0.301140E-02
     809 2S   114  GLY  HA1     6   0.900000E-01   1.00800           0   0.00000     -0.301140E-02
     810 2S   114  GLY  HA2     6   0.900000E-01   1.00800           0   0.00000     -0.301140E-02
     811 2S   114  GLY  C      20   0.510000       12.0110           0   0.00000     -0.301140E-02
     812 2S   114  GLY  O      70  -0.510000       15.9990           0   0.00000     -0.301140E-02
     813 2S   115  THR  N      54  -0.470000       14.0070           0   0.00000     -0.301140E-02
     814 2S   115  THR  HN      1   0.310000       1.00800           0   0.00000     -0.301140E-02
     815 2S   115  THR  CA     22   0.700000E-01   12.0110           0   0.00000     -0.301140E-02
     816 2S   115  THR  HA      6   0.900000E-01   1.00800           0   0.00000     -0.301140E-02
     817 2S   115  THR  CB     22   0.140000       12.0110           0   0.00000     -0.301140E-02
     818 2S   115  THR  HB      3   0.900000E-01   1.00800           0   0.00000     -0.301140E-02
     819 2S   115  THR  OG1    73  -0.660000       15.9990           0   0.00000     -0.301140E-02
     820 2S   115  THR  HG1     1   0.430000       1.00800           0   0.00000     -0.301140E-02
     821 2S   115  THR  CG2    24  -0.270000       12.0110           0   0.00000     -0.301140E-02
     822 2S   115  THR  HG21    3   0.900000E-01   1.00800           0   0.00000     -0.301140E-02
     823 2S   115  THR  HG22    3   0.900000E-01   1.00800           0   0.00000     -0.301140E-02
     824 2S   115  THR  HG23    3   0.900000E-01   1.00800           0   0.00000     -0.301140E-02
     825 2S   115  THR  C      20   0.510000       12.0110           0   0.00000     -0.301140E-02
     826 2S   115  THR  O      70  -0.510000       15.9990           0   0.00000     -0.301140E-02
     827 2S   116  GLY  N      54  -0.470000       14.0070           0   0.00000     -0.301140E-02
     828 2S   116  GLY  HN      1   0.310000       1.00800           0   0.00000     -0.301140E-02
     829 2S   116  GLY  CA     23  -0.200000E-01   12.0110           0   0.00000     -0.301140E-02
     830 2S   116  GLY  HA1     6   0.900000E-01   1.00800           0   0.00000     -0.301140E-02
     831 2S   116  GLY  HA2     6   0.900000E-01   1.00800           0   0.00000     -0.301140E-02
     832 2S   116  GLY  C      20   0.510000       12.0110           0   0.00000     -0.301140E-02
     833 2S   116  GLY  O      70  -0.510000       15.9990           0   0.00000     -0.301140E-02
     834 2S   117  PRO  N      50  -0.290000       14.0070           0   0.00000     -0.301140E-02
     835 2S   117  PRO  CD     31    0.00000       12.0110           0   0.00000     -0.301140E-02
     836 2S   117  PRO  HD1     3   0.900000E-01   1.00800           0   0.00000     -0.301140E-02
     837 2S   117  PRO  HD2     3   0.900000E-01   1.00800           0   0.00000     -0.301140E-02
     838 2S   117  PRO  CA     29   0.200000E-01   12.0110           0   0.00000     -0.301140E-02
     839 2S   117  PRO  HA      6   0.900000E-01   1.00800           0   0.00000     -0.301140E-02
     840 2S   117  PRO  CB     30  -0.180000       12.0110           0   0.00000     -0.301140E-02
     841 2S   117  PRO  HB1     3   0.900000E-01   1.00800           0   0.00000     -0.301140E-02
     842 2S   117  PRO  HB2     3   0.900000E-01   1.00800           0   0.00000     -0.301140E-02
     843 2S   117  PRO  CG     30  -0.180000       12.0110           0   0.00000     -0.301140E-02
     844 2S   117  PRO  HG1     3   0.900000E-01   1.00800           0   0.00000     -0.301140E-02
     845 2S   117  PRO  HG2     3   0.900000E-01   1.00800           0   0.00000     -0.301140E-02
     846 2S   117  PRO  C      20   0.510000       12.0110           0   0.00000     -0.301140E-02
     847 2S   117  PRO  O      70  -0.510000       15.9990           0   0.00000     -0.301140E-02
     848 2S   118  GLU  N      54  -0.470000       14.0070           0   0.00000     -0.301140E-02
     849 2S   118  GLU  HN      1   0.310000       1.00800           0   0.00000     -0.301140E-02
     850 2S   118  GLU  CA     22   0.700000E-01   12.0110           0   0.00000     -0.301140E-02
     851 2S   118  GLU  HA      6   0.900000E-01   1.00800           0   0.00000     -0.301140E-02
     852 2S   118  GLU  CB     23  -0.180000       12.0110           0   0.00000     -0.301140E-02
     853 2S   118  GLU  HB1     3   0.900000E-01   1.00800           0   0.00000     -0.301140E-02
     854 2S   118  GLU  HB2     3   0.900000E-01   1.00800           0   0.00000     -0.301140E-02
     855 2S   118  GLU  CG     23  -0.280000       12.0110           0   0.00000     -0.301140E-02
     856 2S   118  GLU  HG1     3   0.900000E-01   1.00800           0   0.00000     -0.301140E-02
     857 2S   118  GLU  HG2     3   0.900000E-01   1.00800           0   0.00000     -0.301140E-02
     858 2S   118  GLU  CD     32   0.620000       12.0110           0   0.00000     -0.301140E-02
     859 2S   118  GLU  OE1    72  -0.760000       15.9990           0   0.00000     -0.301140E-02
     860 2S   118  GLU  OE2    72  -0.760000       15.9990           0   0.00000     -0.301140E-02
     861 2S   118  GLU  C      20   0.510000       12.0110           0   0.00000     -0.301140E-02
     862 2S   118  GLU  O      70  -0.510000       15.9990           0   0.00000     -0.301140E-02
     863 2S   119  ALA  N      54  -0.470000       14.0070           0   0.00000     -0.301140E-02
     864 2S   119  ALA  HN      1   0.310000       1.00800           0   0.00000     -0.301140E-02
     865 2S   119  ALA  CA     22   0.700000E-01   12.0110           0   0.00000     -0.301140E-02
     866 2S   119  ALA  HA      6   0.900000E-01   1.00800           0   0.00000     -0.301140E-02
     867 2S   119  ALA  CB     24  -0.270000       12.0110           0   0.00000     -0.301140E-02
     868 2S   119  ALA  HB1     3   0.900000E-01   1.00800           0   0.00000     -0.301140E-02
     869 2S   119  ALA  HB2     3   0.900000E-01   1.00800           0   0.00000     -0.301140E-02
     870 2S   119  ALA  HB3     3   0.900000E-01   1.00800           0   0.00000     -0.301140E-02
     871 2S   119  ALA  C      20   0.510000       12.0110           0   0.00000     -0.301140E-02
     872 2S   119  ALA  O      70  -0.510000       15.9990           0   0.00000     -0.301140E-02
     873 2S   120  GLY  N      54  -0.470000       14.0070           0   0.00000     -0.301140E-02
     874 2S   120  GLY  HN      1   0.310000       1.00800           0   0.00000     -0.301140E-02
     875 2S   120  GLY  CA     23  -0.200000E-01   12.0110           0   0.00000     -0.301140E-02
     876 2S   120  GLY  HA1     6   0.900000E-01   1.00800           0   0.00000     -0.301140E-02
     877 2S   120  GLY  HA2     6   0.900000E-01   1.00800           0   0.00000     -0.301140E-02
     878 2S   120  GLY  C      20   0.510000       12.0110           0   0.00000     -0.301140E-02
     879 2S   120  GLY  O      70  -0.510000       15.9990           0   0.00000     -0.301140E-02
     880 2S   121  LEU  N      54  -0.470000       14.0070           0   0.00000     -0.301140E-02
     881 2S   121  LEU  HN      1   0.310000       1.00800           0   0.00000     -0.301140E-02
     882 2S   121  LEU  CA     22   0.700000E-01   12.0110           0   0.00000     -0.301140E-02
     883 2S   121  LEU  HA      6   0.900000E-01   1.00800           0   0.00000     -0.301140E-02
     884 2S   121  LEU  CB     23  -0.180000       12.0110           0   0.00000     -0.301140E-02
     885 2S   121  LEU  HB1     3   0.900000E-01   1.00800           0   0.00000     -0.301140E-02
     886 2S   121  LEU  HB2     3   0.900000E-01   1.00800           0   0.00000     -0.301140E-02
     887 2S   121  LEU  CG     22  -0.900000E-01   12.0110           0   0.00000     -0.301140E-02
     888 2S   121  LEU  HG      3   0.900000E-01   1.00800           0   0.00000     -0.301140E-02
     889 2S   121  LEU  CD1    24  -0.270000       12.0110           0   0.00000     -0.301140E-02
     890 2S   121  LEU  HD11    3   0.900000E-01   1.00800           0   0.00000     -0.301140E-02
     891 2S   121  LEU  HD12    3   0.900000E-01   1.00800           0   0.00000     -0.301140E-02
     892 2S   121  LEU  HD13    3   0.900000E-01   1.00800           0   0.00000     -0.301140E-02
     893 2S   121  LEU  CD2    24  -0.270000       12.0110           0   0.00000     -0.301140E-02
     894 2S   121  LEU  HD21    3   0.900000E-01   1.00800           0   0.00000     -0.301140E-02
     895 2S   121  LEU  HD22    3   0.900000E-01   1.00800           0   0.00000     -0.301140E-02
     896 2S   121  LEU  HD23    3   0.900000E-01   1.00800           0   0.00000     -0.301140E-02
     897 2S   121  LEU  C      20   0.510000       12.0110           0   0.00000     -0.301140E-02
     898 2S   121  LEU  O      70  -0.510000       15.9990           0   0.00000     -0.301140E-02
     899 2S   122  PRO  N      50  -0.290000       14.0070           0   0.00000     -0.301140E-02
     900 2S   122  PRO  CD     31    0.00000       12.0110           0   0.00000     -0.301140E-02
     901 2S   122  PRO  HD1     3   0.900000E-01   1.00800           0   0.00000     -0.301140E-02
     902 2S   122  PRO  HD2     3   0.900000E-01   1.00800           0   0.00000     -0.301140E-02
     903 2S   122  PRO  CA     29   0.200000E-01   12.0110           0   0.00000     -0.301140E-02
     904 2S   122  PRO  HA      6   0.900000E-01   1.00800           0   0.00000     -0.301140E-02
     905 2S   122  PRO  CB     30  -0.180000       12.0110           0   0.00000     -0.301140E-02
     906 2S   122  PRO  HB1     3   0.900000E-01   1.00800           0   0.00000     -0.301140E-02
     907 2S   122  PRO  HB2     3   0.900000E-01   1.00800           0   0.00000     -0.301140E-02
     908 2S   122  PRO  CG     30  -0.180000       12.0110           0   0.00000     -0.301140E-02
     909 2S   122  PRO  HG1     3   0.900000E-01   1.00800           0   0.00000     -0.301140E-02
     910 2S   122  PRO  HG2     3   0.900000E-01   1.00800           0   0.00000     -0.301140E-02
     911 2S   122  PRO  C      20   0.510000       12.0110           0   0.00000     -0.301140E-02
     912 2S   122  PRO  O      70  -0.510000       15.9990           0   0.00000     -0.301140E-02
     913 2S   123  TYR  N      54  -0.470000       14.0070           0   0.00000     -0.301140E-02
     914 2S   123  TYR  HN      1   0.310000       1.00800           0   0.00000     -0.301140E-02
     915 2S   123  TYR  CA     22   0.700000E-01   12.0110           0   0.00000     -0.301140E-02
     916 2S   123  TYR  HA      6   0.900000E-01   1.00800           0   0.00000     -0.301140E-02
     917 2S   123  TYR  CB     23  -0.180000       12.0110           0   0.00000     -0.301140E-02
     918 2S   123  TYR  HB1     3   0.900000E-01   1.00800           0   0.00000     -0.301140E-02
     919 2S   123  TYR  HB2     3   0.900000E-01   1.00800           0   0.00000     -0.301140E-02
     920 2S   123  TYR  CG     21    0.00000       12.0110           0   0.00000     -0.301140E-02
     921 2S   123  TYR  CD1    21  -0.115000       12.0110           0   0.00000     -0.301140E-02
     922 2S   123  TYR  HD1     5   0.115000       1.00800           0   0.00000     -0.301140E-02
     923 2S   123  TYR  CE1    21  -0.115000       12.0110           0   0.00000     -0.301140E-02
     924 2S   123  TYR  HE1     5   0.115000       1.00800           0   0.00000     -0.301140E-02
     925 2S   123  TYR  CZ     21   0.110000       12.0110           0   0.00000     -0.301140E-02
     926 2S   123  TYR  OH     73  -0.540000       15.9990           0   0.00000     -0.301140E-02
     927 2S   123  TYR  HH      1   0.430000       1.00800           0   0.00000     -0.301140E-02
     928 2S   123  TYR  CD2    21  -0.115000       12.0110           0   0.00000     -0.301140E-02
     929 2S   123  TYR  HD2     5   0.115000       1.00800           0   0.00000     -0.301140E-02
     930 2S   123  TYR  CE2    21  -0.115000       12.0110           0   0.00000     -0.301140E-02
     931 2S   123  TYR  HE2     5   0.115000       1.00800           0   0.00000     -0.301140E-02
     932 2S   123  TYR  C      20   0.510000       12.0110           0   0.00000     -0.301140E-02
     933 2S   123  TYR  O      70  -0.510000       15.9990           0   0.00000     -0.301140E-02
     934 2S   124  GLY  N      54  -0.470000       14.0070           0   0.00000     -0.301140E-02
     935 2S   124  GLY  HN      1   0.310000       1.00800           0   0.00000     -0.301140E-02
     936 2S   124  GLY  CA     23  -0.200000E-01   12.0110           0   0.00000     -0.301140E-02
     937 2S   124  GLY  HA1     6   0.900000E-01   1.00800           0   0.00000     -0.301140E-02
     938 2S   124  GLY  HA2     6   0.900000E-01   1.00800           0   0.00000     -0.301140E-02
     939 2S   124  GLY  C      20   0.510000       12.0110           0   0.00000     -0.301140E-02
     940 2S   124  GLY  O      70  -0.510000       15.9990           0   0.00000     -0.301140E-02
     941 2S   125  ALA  N      54  -0.470000       14.0070           0   0.00000     -0.301140E-02
     942 2S   125  ALA  HN      1   0.310000       1.00800           0   0.00000     -0.301140E-02
     943 2S   125  ALA  CA     22   0.700000E-01   12.0110           0   0.00000     -0.301140E-02
     944 2S   125  ALA  HA      6   0.900000E-01   1.00800           0   0.00000     -0.301140E-02
     945 2S   125  ALA  CB     24  -0.270000       12.0110           0   0.00000     -0.301140E-02
     946 2S   125  ALA  HB1     3   0.900000E-01   1.00800           0   0.00000     -0.301140E-02
     947 2S   125  ALA  HB2     3   0.900000E-01   1.00800           0   0.00000     -0.301140E-02
     948 2S   125  ALA  HB3     3   0.900000E-01   1.00800           0   0.00000     -0.301140E-02
     949 2S   125  ALA  C      20   0.510000       12.0110           0   0.00000     -0.301140E-02
     950 2S   125  ALA  O      70  -0.510000       15.9990           0   0.00000     -0.301140E-02
     951 2S   126  ASN  N      54  -0.470000       14.0070           0   0.00000     -0.301140E-02
     952 2S   126  ASN  HN      1   0.310000       1.00800           0   0.00000     -0.301140E-02
     953 2S   126  ASN  CA     22   0.700000E-01   12.0110           0   0.00000     -0.301140E-02
     954 2S   126  ASN  HA      6   0.900000E-01   1.00800           0   0.00000     -0.301140E-02
     955 2S   126  ASN  CB     23  -0.180000       12.0110           0   0.00000     -0.301140E-02
     956 2S   126  ASN  HB1     3   0.900000E-01   1.00800           0   0.00000     -0.301140E-02
     957 2S   126  ASN  HB2     3   0.900000E-01   1.00800           0   0.00000     -0.301140E-02
     958 2S   126  ASN  CG     32   0.550000       12.0110           0   0.00000     -0.301140E-02
     959 2S   126  ASN  OD1    70  -0.550000       15.9990           0   0.00000     -0.301140E-02
     960 2S   126  ASN  ND2    55  -0.620000       14.0070           0   0.00000     -0.301140E-02
     961 2S   126  ASN  HD21    1   0.320000       1.00800           0   0.00000     -0.301140E-02
     962 2S   126  ASN  HD22    1   0.300000       1.00800           0   0.00000     -0.301140E-02
     963 2S   126  ASN  C      20   0.510000       12.0110           0   0.00000     -0.301140E-02
     964 2S   126  ASN  O      70  -0.510000       15.9990           0   0.00000     -0.301140E-02
     965 2S   127  LYS  N      54  -0.470000       14.0070           0   0.00000     -0.301140E-02
     966 2S   127  LYS  HN      1   0.310000       1.00800           0   0.00000     -0.301140E-02
     967 2S   127  LYS  CA     22   0.700000E-01   12.0110           0   0.00000     -0.301140E-02
     968 2S   127  LYS  HA      6   0.900000E-01   1.00800           0   0.00000     -0.301140E-02
     969 2S   127  LYS  CB     23  -0.180000       12.0110           0   0.00000     -0.301140E-02
     970 2S   127  LYS  HB1     3   0.900000E-01   1.00800           0   0.00000     -0.301140E-02
     971 2S   127  LYS  HB2     3   0.900000E-01   1.00800           0   0.00000     -0.301140E-02
     972 2S   127  LYS  CG     23  -0.180000       12.0110           0   0.00000     -0.301140E-02
     973 2S   127  LYS  HG1     3   0.900000E-01   1.00800           0   0.00000     -0.301140E-02
     974 2S   127  LYS  HG2     3   0.900000E-01   1.00800           0   0.00000     -0.301140E-02
     975 2S   127  LYS  CD     23  -0.180000       12.0110           0   0.00000     -0.301140E-02
     976 2S   127  LYS  HD1     3   0.900000E-01   1.00800           0   0.00000     -0.301140E-02
     977 2S   127  LYS  HD2     3   0.900000E-01   1.00800           0   0.00000     -0.301140E-02
     978 2S   127  LYS  CE     23   0.210000       12.0110           0   0.00000     -0.301140E-02
     979 2S   127  LYS  HE1     3   0.500000E-01   1.00800           0   0.00000     -0.301140E-02
     980 2S   127  LYS  HE2     3   0.500000E-01   1.00800           0   0.00000     -0.301140E-02
     981 2S   127  LYS  NZ     56  -0.300000       14.0070           0   0.00000     -0.301140E-02
     982 2S   127  LYS  HZ1     2   0.330000       1.00800           0   0.00000     -0.301140E-02
     983 2S   127  LYS  HZ2     2   0.330000       1.00800           0   0.00000     -0.301140E-02
     984 2S   127  LYS  HZ3     2   0.330000       1.00800           0   0.00000     -0.301140E-02
     985 2S   127  LYS  C      20   0.510000       12.0110           0   0.00000     -0.301140E-02
     986 2S   127  LYS  O      70  -0.510000       15.9990           0   0.00000     -0.301140E-02
     987 2S   128  ASP  N      54  -0.470000       14.0070           0   0.00000     -0.301140E-02
     988 2S   128  ASP  HN      1   0.310000       1.00800           0   0.00000     -0.301140E-02
     989 2S   128  ASP  CA     22   0.700000E-01   12.0110           0   0.00000     -0.301140E-02
     990 2S   128  ASP  HA      6   0.900000E-01   1.00800           0   0.00000     -0.301140E-02
     991 2S   128  ASP  CB     23  -0.280000       12.0110           0   0.00000     -0.301140E-02
     992 2S   128  ASP  HB1     3   0.900000E-01   1.00800           0   0.00000     -0.301140E-02
     993 2S   128  ASP  HB2     3   0.900000E-01   1.00800           0   0.00000     -0.301140E-02
     994 2S   128  ASP  CG     32   0.620000       12.0110           0   0.00000     -0.301140E-02
     995 2S   128  ASP  OD1    72  -0.760000       15.9990           0   0.00000     -0.301140E-02
     996 2S   128  ASP  OD2    72  -0.760000       15.9990           0   0.00000     -0.301140E-02
     997 2S   128  ASP  C      20   0.510000       12.0110           0   0.00000     -0.301140E-02
     998 2S   128  ASP  O      70  -0.510000       15.9990           0   0.00000     -0.301140E-02
     999 2S   129  GLY  N      54  -0.470000       14.0070           0   0.00000     -0.301140E-02
    1000 2S   129  GLY  HN      1   0.310000       1.00800           0   0.00000     -0.301140E-02
    1001 2S   129  GLY  CA     23  -0.200000E-01   12.0110           0   0.00000     -0.301140E-02
    1002 2S   129  GLY  HA1     6   0.900000E-01   1.00800           0   0.00000     -0.301140E-02
    1003 2S   129  GLY  HA2     6   0.900000E-01   1.00800           0   0.00000     -0.301140E-02
    1004 2S   129  GLY  C      20   0.510000       12.0110           0   0.00000     -0.301140E-02
    1005 2S   129  GLY  O      70  -0.510000       15.9990           0   0.00000     -0.301140E-02
    1006 2S   130  ILE  N      54  -0.470000       14.0070           0   0.00000     -0.301140E-02
    1007 2S   130  ILE  HN      1   0.310000       1.00800           0   0.00000     -0.301140E-02
    1008 2S   130  ILE  CA     22   0.700000E-01   12.0110           0   0.00000     -0.301140E-02
    1009 2S   130  ILE  HA      6   0.900000E-01   1.00800           0   0.00000     -0.301140E-02
    1010 2S   130  ILE  CB     22  -0.900000E-01   12.0110           0   0.00000     -0.301140E-02
    1011 2S   130  ILE  HB      3   0.900000E-01   1.00800           0   0.00000     -0.301140E-02
    1012 2S   130  ILE  CG2    24  -0.270000       12.0110           0   0.00000     -0.301140E-02
    1013 2S   130  ILE  HG21    3   0.900000E-01   1.00800           0   0.00000     -0.301140E-02
    1014 2S   130  ILE  HG22    3   0.900000E-01   1.00800           0   0.00000     -0.301140E-02
    1015 2S   130  ILE  HG23    3   0.900000E-01   1.00800           0   0.00000     -0.301140E-02
    1016 2S   130  ILE  CG1    23  -0.180000       12.0110           0   0.00000     -0.301140E-02
    1017 2S   130  ILE  HG11    3   0.900000E-01   1.00800           0   0.00000     -0.301140E-02
    1018 2S   130  ILE  HG12    3   0.900000E-01   1.00800           0   0.00000     -0.301140E-02
    1019 2S   130  ILE  CD     24  -0.270000       12.0110           0   0.00000     -0.301140E-02
    1020 2S   130  ILE  HD1     3   0.900000E-01   1.00800           0   0.00000     -0.301140E-02
    1021 2S   130  ILE  HD2     3   0.900000E-01   1.00800           0   0.00000     -0.301140E-02
    1022 2S   130  ILE  HD3     3   0.900000E-01   1.00800           0   0.00000     -0.301140E-02
    1023 2S   130  ILE  C      20   0.510000       12.0110           0   0.00000     -0.301140E-02
    1024 2S   130  ILE  O      70  -0.510000       15.9990           0   0.00000     -0.301140E-02
    1025 2S   131  ILE  N      54  -0.470000       14.0070           0   0.00000     -0.301140E-02
    1026 2S   131  ILE  HN      1   0.310000       1.00800           0   0.00000     -0.301140E-02
    1027 2S   131  ILE  CA     22   0.700000E-01   12.0110           0   0.00000     -0.301140E-02
    1028 2S   131  ILE  HA      6   0.900000E-01   1.00800           0   0.00000     -0.301140E-02
    1029 2S   131  ILE  CB     22  -0.900000E-01   12.0110           0   0.00000     -0.301140E-02
    1030 2S   131  ILE  HB      3   0.900000E-01   1.00800           0   0.00000     -0.301140E-02
    1031 2S   131  ILE  CG2    24  -0.270000       12.0110           0   0.00000     -0.301140E-02
    1032 2S   131  ILE  HG21    3   0.900000E-01   1.00800           0   0.00000     -0.301140E-02
    1033 2S   131  ILE  HG22    3   0.900000E-01   1.00800           0   0.00000     -0.301140E-02
    1034 2S   131  ILE  HG23    3   0.900000E-01   1.00800           0   0.00000     -0.301140E-02
    1035 2S   131  ILE  CG1    23  -0.180000       12.0110           0   0.00000     -0.301140E-02
    1036 2S   131  ILE  HG11    3   0.900000E-01   1.00800           0   0.00000     -0.301140E-02
    1037 2S   131  ILE  HG12    3   0.900000E-01   1.00800           0   0.00000     -0.301140E-02
    1038 2S   131  ILE  CD     24  -0.270000       12.0110           0   0.00000     -0.301140E-02
    1039 2S   131  ILE  HD1     3   0.900000E-01   1.00800           0   0.00000     -0.301140E-02
    1040 2S   131  ILE  HD2     3   0.900000E-01   1.00800           0   0.00000     -0.301140E-02
    1041 2S   131  ILE  HD3     3   0.900000E-01   1.00800           0   0.00000     -0.301140E-02
    1042 2S   131  ILE  C      20   0.510000       12.0110           0   0.00000     -0.301140E-02
    1043 2S   131  ILE  O      70  -0.510000       15.9990           0   0.00000     -0.301140E-02
    1044 2S   132  TRP  N      54  -0.470000       14.0070           0   0.00000     -0.301140E-02
    1045 2S   132  TRP  HN      1   0.310000       1.00800           0   0.00000     -0.301140E-02
    1046 2S   132  TRP  CA     22   0.700000E-01   12.0110           0   0.00000     -0.301140E-02
    1047 2S   132  TRP  HA      6   0.900000E-01   1.00800           0   0.00000     -0.301140E-02
    1048 2S   132  TRP  CB     23  -0.180000       12.0110           0   0.00000     -0.301140E-02
    1049 2S   132  TRP  HB1     3   0.900000E-01   1.00800           0   0.00000     -0.301140E-02
    1050 2S   132  TRP  HB2     3   0.900000E-01   1.00800           0   0.00000     -0.301140E-02
    1051 2S   132  TRP  CG     28  -0.300000E-01   12.0110           0   0.00000     -0.301140E-02
    1052 2S   132  TRP  CD1    21   0.350000E-01   12.0110           0   0.00000     -0.301140E-02
    1053 2S   132  TRP  HD1     5   0.115000       1.00800           0   0.00000     -0.301140E-02
    1054 2S   132  TRP  NE1    58  -0.610000       14.0070           0   0.00000     -0.301140E-02
    1055 2S   132  TRP  HE1     1   0.380000       1.00800           0   0.00000     -0.301140E-02
    1056 2S   132  TRP  CE2    27   0.130000       12.0110           0   0.00000     -0.301140E-02
    1057 2S   132  TRP  CD2    27  -0.200000E-01   12.0110           0   0.00000     -0.301140E-02
    1058 2S   132  TRP  CE3    21  -0.115000       12.0110           0   0.00000     -0.301140E-02
    1059 2S   132  TRP  HE3     5   0.115000       1.00800           0   0.00000     -0.301140E-02
    1060 2S   132  TRP  CZ3    21  -0.115000       12.0110           0   0.00000     -0.301140E-02
    1061 2S   132  TRP  HZ3     5   0.115000       1.00800           0   0.00000     -0.301140E-02
    1062 2S   132  TRP  CZ2    21  -0.115000       12.0110           0   0.00000     -0.301140E-02
    1063 2S   132  TRP  HZ2     5   0.115000       1.00800           0   0.00000     -0.301140E-02
    1064 2S   132  TRP  CH2    21  -0.115000       12.0110           0   0.00000     -0.301140E-02
    1065 2S   132  TRP  HH2     5   0.115000       1.00800           0   0.00000     -0.301140E-02
    1066 2S   132  TRP  C      20   0.510000       12.0110           0   0.00000     -0.301140E-02
    1067 2S   132  TRP  O      70  -0.510000       15.9990           0   0.00000     -0.301140E-02
    1068 2S   133  VAL  N      54  -0.470000       14.0070           0   0.00000     -0.301140E-02
    1069 2S   133  VAL  HN      1   0.310000       1.00800           0   0.00000     -0.301140E-02
    1070 2S   133  VAL  CA     22   0.700000E-01   12.0110           0   0.00000     -0.301140E-02
    1071 2S   133  VAL  HA      6   0.900000E-01   1.00800           0   0.00000     -0.301140E-02
    1072 2S   133  VAL  CB     22  -0.900000E-01   12.0110           0   0.00000     -0.301140E-02
    1073 2S   133  VAL  HB      3   0.900000E-01   1.00800           0   0.00000     -0.301140E-02
    1074 2S   133  VAL  CG1    24  -0.270000       12.0110           0   0.00000     -0.301140E-02
    1075 2S   133  VAL  HG11    3   0.900000E-01   1.00800           0   0.00000     -0.301140E-02
    1076 2S   133  VAL  HG12    3   0.900000E-01   1.00800           0   0.00000     -0.301140E-02
    1077 2S   133  VAL  HG13    3   0.900000E-01   1.00800           0   0.00000     -0.301140E-02
    1078 2S   133  VAL  CG2    24  -0.270000       12.0110           0   0.00000     -0.301140E-02
    1079 2S   133  VAL  HG21    3   0.900000E-01   1.00800           0   0.00000     -0.301140E-02
    1080 2S   133  VAL  HG22    3   0.900000E-01   1.00800           0   0.00000     -0.301140E-02
    1081 2S   133  VAL  HG23    3   0.900000E-01   1.00800           0   0.00000     -0.301140E-02
    1082 2S   133  VAL  C      20   0.510000       12.0110           0   0.00000     -0.301140E-02
    1083 2S   133  VAL  O      70  -0.510000       15.9990           0   0.00000     -0.301140E-02
    1084 2S   134  ALA  N      54  -0.470000       14.0070           0   0.00000     -0.301140E-02
    1085 2S   134  ALA  HN      1   0.310000       1.00800           0   0.00000     -0.301140E-02
    1086 2S   134  ALA  CA     22   0.700000E-01   12.0110           0   0.00000     -0.301140E-02
    1087 2S   134  ALA  HA      6   0.900000E-01   1.00800           0   0.00000     -0.301140E-02
    1088 2S   134  ALA  CB     24  -0.270000       12.0110           0   0.00000     -0.301140E-02
    1089 2S   134  ALA  HB1     3   0.900000E-01   1.00800           0   0.00000     -0.301140E-02
    1090 2S   134  ALA  HB2     3   0.900000E-01   1.00800           0   0.00000     -0.301140E-02
    1091 2S   134  ALA  HB3     3   0.900000E-01   1.00800           0   0.00000     -0.301140E-02
    1092 2S   134  ALA  C      20   0.510000       12.0110           0   0.00000     -0.301140E-02
    1093 2S   134  ALA  O      70  -0.510000       15.9990           0   0.00000     -0.301140E-02
    1094 2S   135  THR  N      54  -0.470000       14.0070           0   0.00000     -0.301140E-02
    1095 2S   135  THR  HN      1   0.310000       1.00800           0   0.00000     -0.301140E-02
    1096 2S   135  THR  CA     22   0.700000E-01   12.0110           0   0.00000     -0.301140E-02
    1097 2S   135  THR  HA      6   0.900000E-01   1.00800           0   0.00000     -0.301140E-02
    1098 2S   135  THR  CB     22   0.140000       12.0110           0   0.00000     -0.301140E-02
    1099 2S   135  THR  HB      3   0.900000E-01   1.00800           0   0.00000     -0.301140E-02
    1100 2S   135  THR  OG1    73  -0.660000       15.9990           0   0.00000     -0.301140E-02
    1101 2S   135  THR  HG1     1   0.430000       1.00800           0   0.00000     -0.301140E-02
    1102 2S   135  THR  CG2    24  -0.270000       12.0110           0   0.00000     -0.301140E-02
    1103 2S   135  THR  HG21    3   0.900000E-01   1.00800           0   0.00000     -0.301140E-02
    1104 2S   135  THR  HG22    3   0.900000E-01   1.00800           0   0.00000     -0.301140E-02
    1105 2S   135  THR  HG23    3   0.900000E-01   1.00800           0   0.00000     -0.301140E-02
    1106 2S   135  THR  C      20   0.510000       12.0110           0   0.00000     -0.301140E-02
    1107 2S   135  THR  O      70  -0.510000       15.9990           0   0.00000     -0.301140E-02
    1108 2S   136  GLU  N      54  -0.470000       14.0070           0   0.00000     -0.301140E-02
    1109 2S   136  GLU  HN      1   0.310000       1.00800           0   0.00000     -0.301140E-02
    1110 2S   136  GLU  CA     22   0.700000E-01   12.0110           0   0.00000     -0.301140E-02
    1111 2S   136  GLU  HA      6   0.900000E-01   1.00800           0   0.00000     -0.301140E-02
    1112 2S   136  GLU  CB     23  -0.180000       12.0110           0   0.00000     -0.301140E-02
    1113 2S   136  GLU  HB1     3   0.900000E-01   1.00800           0   0.00000     -0.301140E-02
    1114 2S   136  GLU  HB2     3   0.900000E-01   1.00800           0   0.00000     -0.301140E-02
    1115 2S   136  GLU  CG     23  -0.280000       12.0110           0   0.00000     -0.301140E-02
    1116 2S   136  GLU  HG1     3   0.900000E-01   1.00800           0   0.00000     -0.301140E-02
    1117 2S   136  GLU  HG2     3   0.900000E-01   1.00800           0   0.00000     -0.301140E-02
    1118 2S   136  GLU  CD     32   0.620000       12.0110           0   0.00000     -0.301140E-02
    1119 2S   136  GLU  OE1    72  -0.760000       15.9990           0   0.00000     -0.301140E-02
    1120 2S   136  GLU  OE2    72  -0.760000       15.9990           0   0.00000     -0.301140E-02
    1121 2S   136  GLU  C      20   0.510000       12.0110           0   0.00000     -0.301140E-02
    1122 2S   136  GLU  O      70  -0.510000       15.9990           0   0.00000     -0.301140E-02
    1123 2S   137  GLY  N      54  -0.470000       14.0070           0   0.00000     -0.301140E-02
    1124 2S   137  GLY  HN      1   0.310000       1.00800           0   0.00000     -0.301140E-02
    1125 2S   137  GLY  CA     23  -0.200000E-01   12.0110           0   0.00000     -0.301140E-02
    1126 2S   137  GLY  HA1     6   0.900000E-01   1.00800           0   0.00000     -0.301140E-02
    1127 2S   137  GLY  HA2     6   0.900000E-01   1.00800           0   0.00000     -0.301140E-02
    1128 2S   137  GLY  C      20   0.510000       12.0110           0   0.00000     -0.301140E-02
    1129 2S   137  GLY  O      70  -0.510000       15.9990           0   0.00000     -0.301140E-02
    1130 2S   138  ALA  N      54  -0.470000       14.0070           0   0.00000     -0.301140E-02
    1131 2S   138  ALA  HN      1   0.310000       1.00800           0   0.00000     -0.301140E-02
    1132 2S   138  ALA  CA     22   0.700000E-01   12.0110           0   0.00000     -0.301140E-02
    1133 2S   138  ALA  HA      6   0.900000E-01   1.00800           0   0.00000     -0.301140E-02
    1134 2S   138  ALA  CB     24  -0.270000       12.0110           0   0.00000     -0.301140E-02
    1135 2S   138  ALA  HB1     3   0.900000E-01   1.00800           0   0.00000     -0.301140E-02
    1136 2S   138  ALA  HB2     3   0.900000E-01   1.00800           0   0.00000     -0.301140E-02
    1137 2S   138  ALA  HB3     3   0.900000E-01   1.00800           0   0.00000     -0.301140E-02
    1138 2S   138  ALA  C      20   0.510000       12.0110           0   0.00000     -0.301140E-02
    1139 2S   138  ALA  O      70  -0.510000       15.9990           0   0.00000     -0.301140E-02
    1140 2S   139  LEU  N      54  -0.470000       14.0070           0   0.00000     -0.301140E-02
    1141 2S   139  LEU  HN      1   0.310000       1.00800           0   0.00000     -0.301140E-02
    1142 2S   139  LEU  CA     22   0.700000E-01   12.0110           0   0.00000     -0.301140E-02
    1143 2S   139  LEU  HA      6   0.900000E-01   1.00800           0   0.00000     -0.301140E-02
    1144 2S   139  LEU  CB     23  -0.180000       12.0110           0   0.00000     -0.301140E-02
    1145 2S   139  LEU  HB1     3   0.900000E-01   1.00800           0   0.00000     -0.301140E-02
    1146 2S   139  LEU  HB2     3   0.900000E-01   1.00800           0   0.00000     -0.301140E-02
    1147 2S   139  LEU  CG     22  -0.900000E-01   12.0110           0   0.00000     -0.301140E-02
    1148 2S   139  LEU  HG      3   0.900000E-01   1.00800           0   0.00000     -0.301140E-02
    1149 2S   139  LEU  CD1    24  -0.270000       12.0110           0   0.00000     -0.301140E-02
    1150 2S   139  LEU  HD11    3   0.900000E-01   1.00800           0   0.00000     -0.301140E-02
    1151 2S   139  LEU  HD12    3   0.900000E-01   1.00800           0   0.00000     -0.301140E-02
    1152 2S   139  LEU  HD13    3   0.900000E-01   1.00800           0   0.00000     -0.301140E-02
    1153 2S   139  LEU  CD2    24  -0.270000       12.0110           0   0.00000     -0.301140E-02
    1154 2S   139  LEU  HD21    3   0.900000E-01   1.00800           0   0.00000     -0.301140E-02
    1155 2S   139  LEU  HD22    3   0.900000E-01   1.00800           0   0.00000     -0.301140E-02
    1156 2S   139  LEU  HD23    3   0.900000E-01   1.00800           0   0.00000     -0.301140E-02
    1157 2S   139  LEU  C      20   0.510000       12.0110           0   0.00000     -0.301140E-02
    1158 2S   139  LEU  O      70  -0.510000       15.9990           0   0.00000     -0.301140E-02
    1159 2S   140  ASN  N      54  -0.470000       14.0070           0   0.00000     -0.301140E-02
    1160 2S   140  ASN  HN      1   0.310000       1.00800           0   0.00000     -0.301140E-02
    1161 2S   140  ASN  CA     22   0.700000E-01   12.0110           0   0.00000     -0.301140E-02
    1162 2S   140  ASN  HA      6   0.900000E-01   1.00800           0   0.00000     -0.301140E-02
    1163 2S   140  ASN  CB     23  -0.180000       12.0110           0   0.00000     -0.301140E-02
    1164 2S   140  ASN  HB1     3   0.900000E-01   1.00800           0   0.00000     -0.301140E-02
    1165 2S   140  ASN  HB2     3   0.900000E-01   1.00800           0   0.00000     -0.301140E-02
    1166 2S   140  ASN  CG     32   0.550000       12.0110           0   0.00000     -0.301140E-02
    1167 2S   140  ASN  OD1    70  -0.550000       15.9990           0   0.00000     -0.301140E-02
    1168 2S   140  ASN  ND2    55  -0.620000       14.0070           0   0.00000     -0.301140E-02
    1169 2S   140  ASN  HD21    1   0.320000       1.00800           0   0.00000     -0.301140E-02
    1170 2S   140  ASN  HD22    1   0.300000       1.00800           0   0.00000     -0.301140E-02
    1171 2S   140  ASN  C      20   0.510000       12.0110           0   0.00000     -0.301140E-02
    1172 2S   140  ASN  O      70  -0.510000       15.9990           0   0.00000     -0.301140E-02
    1173 2S   141  THR  N      54  -0.470000       14.0070           0   0.00000     -0.301140E-02
    1174 2S   141  THR  HN      1   0.310000       1.00800           0   0.00000     -0.301140E-02
    1175 2S   141  THR  CA     22   0.700000E-01   12.0110           0   0.00000     -0.301140E-02
    1176 2S   141  THR  HA      6   0.900000E-01   1.00800           0   0.00000     -0.301140E-02
    1177 2S   141  THR  CB     22   0.140000       12.0110           0   0.00000     -0.301140E-02
    1178 2S   141  THR  HB      3   0.900000E-01   1.00800           0   0.00000     -0.301140E-02
    1179 2S   141  THR  OG1    73  -0.660000       15.9990           0   0.00000     -0.301140E-02
    1180 2S   141  THR  HG1     1   0.430000       1.00800           0   0.00000     -0.301140E-02
    1181 2S   141  THR  CG2    24  -0.270000       12.0110           0   0.00000     -0.301140E-02
    1182 2S   141  THR  HG21    3   0.900000E-01   1.00800           0   0.00000     -0.301140E-02
    1183 2S   141  THR  HG22    3   0.900000E-01   1.00800           0   0.00000     -0.301140E-02
    1184 2S   141  THR  HG23    3   0.900000E-01   1.00800           0   0.00000     -0.301140E-02
    1185 2S   141  THR  C      20   0.510000       12.0110           0   0.00000     -0.301140E-02
    1186 2S   141  THR  O      70  -0.510000       15.9990           0   0.00000     -0.301140E-02
    1187 2S   142  PRO  N      50  -0.290000       14.0070           0   0.00000     -0.301140E-02
    1188 2S   142  PRO  CD     31    0.00000       12.0110           0   0.00000     -0.301140E-02
    1189 2S   142  PRO  HD1     3   0.900000E-01   1.00800           0   0.00000     -0.301140E-02
    1190 2S   142  PRO  HD2     3   0.900000E-01   1.00800           0   0.00000     -0.301140E-02
    1191 2S   142  PRO  CA     29   0.200000E-01   12.0110           0   0.00000     -0.301140E-02
    1192 2S   142  PRO  HA      6   0.900000E-01   1.00800           0   0.00000     -0.301140E-02
    1193 2S   142  PRO  CB     30  -0.180000       12.0110           0   0.00000     -0.301140E-02
    1194 2S   142  PRO  HB1     3   0.900000E-01   1.00800           0   0.00000     -0.301140E-02
    1195 2S   142  PRO  HB2     3   0.900000E-01   1.00800           0   0.00000     -0.301140E-02
    1196 2S   142  PRO  CG     30  -0.180000       12.0110           0   0.00000     -0.301140E-02
    1197 2S   142  PRO  HG1     3   0.900000E-01   1.00800           0   0.00000     -0.301140E-02
    1198 2S   142  PRO  HG2     3   0.900000E-01   1.00800           0   0.00000     -0.301140E-02
    1199 2S   142  PRO  C      20   0.510000       12.0110           0   0.00000     -0.301140E-02
    1200 2S   142  PRO  O      70  -0.510000       15.9990           0   0.00000     -0.301140E-02
    1201 2S   143  LYS  N      54  -0.470000       14.0070           0   0.00000     -0.301140E-02
    1202 2S   143  LYS  HN      1   0.310000       1.00800           0   0.00000     -0.301140E-02
    1203 2S   143  LYS  CA     22   0.700000E-01   12.0110           0   0.00000     -0.301140E-02
    1204 2S   143  LYS  HA      6   0.900000E-01   1.00800           0   0.00000     -0.301140E-02
    1205 2S   143  LYS  CB     23  -0.180000       12.0110           0   0.00000     -0.301140E-02
    1206 2S   143  LYS  HB1     3   0.900000E-01   1.00800           0   0.00000     -0.301140E-02
    1207 2S   143  LYS  HB2     3   0.900000E-01   1.00800           0   0.00000     -0.301140E-02
    1208 2S   143  LYS  CG     23  -0.180000       12.0110           0   0.00000     -0.301140E-02
    1209 2S   143  LYS  HG1     3   0.900000E-01   1.00800           0   0.00000     -0.301140E-02
    1210 2S   143  LYS  HG2     3   0.900000E-01   1.00800           0   0.00000     -0.301140E-02
    1211 2S   143  LYS  CD     23  -0.180000       12.0110           0   0.00000     -0.301140E-02
    1212 2S   143  LYS  HD1     3   0.900000E-01   1.00800           0   0.00000     -0.301140E-02
    1213 2S   143  LYS  HD2     3   0.900000E-01   1.00800           0   0.00000     -0.301140E-02
    1214 2S   143  LYS  CE     23   0.210000       12.0110           0   0.00000     -0.301140E-02
    1215 2S   143  LYS  HE1     3   0.500000E-01   1.00800           0   0.00000     -0.301140E-02
    1216 2S   143  LYS  HE2     3   0.500000E-01   1.00800           0   0.00000     -0.301140E-02
    1217 2S   143  LYS  NZ     56  -0.300000       14.0070           0   0.00000     -0.301140E-02
    1218 2S   143  LYS  HZ1     2   0.330000       1.00800           0   0.00000     -0.301140E-02
    1219 2S   143  LYS  HZ2     2   0.330000       1.00800           0   0.00000     -0.301140E-02
    1220 2S   143  LYS  HZ3     2   0.330000       1.00800           0   0.00000     -0.301140E-02
    1221 2S   143  LYS  C      20   0.510000       12.0110           0   0.00000     -0.301140E-02
    1222 2S   143  LYS  O      70  -0.510000       15.9990           0   0.00000     -0.301140E-02
    1223 2S   144  ASP  N      54  -0.470000       14.0070           0   0.00000     -0.301140E-02
    1224 2S   144  ASP  HN      1   0.310000       1.00800           0   0.00000     -0.301140E-02
    1225 2S   144  ASP  CA     22   0.700000E-01   12.0110           0   0.00000     -0.301140E-02
    1226 2S   144  ASP  HA      6   0.900000E-01   1.00800           0   0.00000     -0.301140E-02
    1227 2S   144  ASP  CB     23  -0.280000       12.0110           0   0.00000     -0.301140E-02
    1228 2S   144  ASP  HB1     3   0.900000E-01   1.00800           0   0.00000     -0.301140E-02
    1229 2S   144  ASP  HB2     3   0.900000E-01   1.00800           0   0.00000     -0.301140E-02
    1230 2S   144  ASP  CG     32   0.620000       12.0110           0   0.00000     -0.301140E-02
    1231 2S   144  ASP  OD1    72  -0.760000       15.9990           0   0.00000     -0.301140E-02
    1232 2S   144  ASP  OD2    72  -0.760000       15.9990           0   0.00000     -0.301140E-02
    1233 2S   144  ASP  C      20   0.510000       12.0110           0   0.00000     -0.301140E-02
    1234 2S   144  ASP  O      70  -0.510000       15.9990           0   0.00000     -0.301140E-02
    1235 2S   145  HSD  N      54  -0.470000       14.0070           0   0.00000     -0.301140E-02
    1236 2S   145  HSD  HN      1   0.310000       1.00800           0   0.00000     -0.301140E-02
    1237 2S   145  HSD  CA     22   0.700000E-01   12.0110           0   0.00000     -0.301140E-02
    1238 2S   145  HSD  HA      6   0.900000E-01   1.00800           0   0.00000     -0.301140E-02
    1239 2S   145  HSD  CB     23  -0.900000E-01   12.0110           0   0.00000     -0.301140E-02
    1240 2S   145  HSD  HB1     3   0.900000E-01   1.00800           0   0.00000     -0.301140E-02
    1241 2S   145  HSD  HB2     3   0.900000E-01   1.00800           0   0.00000     -0.301140E-02
    1242 2S   145  HSD  ND1    51  -0.360000       14.0070           0   0.00000     -0.301140E-02
    1243 2S   145  HSD  HD1     1   0.320000       1.00800           0   0.00000     -0.301140E-02
    1244 2S   145  HSD  CG     25  -0.500000E-01   12.0110           0   0.00000     -0.301140E-02
    1245 2S   145  HSD  CE1    26   0.250000       12.0110           0   0.00000     -0.301140E-02
    1246 2S   145  HSD  HE1     7   0.130000       1.00800           0   0.00000     -0.301140E-02
    1247 2S   145  HSD  NE2    52  -0.700000       14.0070           0   0.00000     -0.301140E-02
    1248 2S   145  HSD  CD2    25   0.220000       12.0110           0   0.00000     -0.301140E-02
    1249 2S   145  HSD  HD2     9   0.100000       1.00800           0   0.00000     -0.301140E-02
    1250 2S   145  HSD  C      20   0.510000       12.0110           0   0.00000     -0.301140E-02
    1251 2S   145  HSD  O      70  -0.510000       15.9990           0   0.00000     -0.301140E-02
    1252 2S   146  ILE  N      54  -0.470000       14.0070           0   0.00000     -0.301140E-02
    1253 2S   146  ILE  HN      1   0.310000       1.00800           0   0.00000     -0.301140E-02
    1254 2S   146  ILE  CA     22   0.700000E-01   12.0110           0   0.00000     -0.301140E-02
    1255 2S   146  ILE  HA      6   0.900000E-01   1.00800           0   0.00000     -0.301140E-02
    1256 2S   146  ILE  CB     22  -0.900000E-01   12.0110           0   0.00000     -0.301140E-02
    1257 2S   146  ILE  HB      3   0.900000E-01   1.00800           0   0.00000     -0.301140E-02
    1258 2S   146  ILE  CG2    24  -0.270000       12.0110           0   0.00000     -0.301140E-02
    1259 2S   146  ILE  HG21    3   0.900000E-01   1.00800           0   0.00000     -0.301140E-02
    1260 2S   146  ILE  HG22    3   0.900000E-01   1.00800           0   0.00000     -0.301140E-02
    1261 2S   146  ILE  HG23    3   0.900000E-01   1.00800           0   0.00000     -0.301140E-02
    1262 2S   146  ILE  CG1    23  -0.180000       12.0110           0   0.00000     -0.301140E-02
    1263 2S   146  ILE  HG11    3   0.900000E-01   1.00800           0   0.00000     -0.301140E-02
    1264 2S   146  ILE  HG12    3   0.900000E-01   1.00800           0   0.00000     -0.301140E-02
    1265 2S   146  ILE  CD     24  -0.270000       12.0110           0   0.00000     -0.301140E-02
    1266 2S   146  ILE  HD1     3   0.900000E-01   1.00800           0   0.00000     -0.301140E-02
    1267 2S   146  ILE  HD2     3   0.900000E-01   1.00800           0   0.00000     -0.301140E-02
    1268 2S   146  ILE  HD3     3   0.900000E-01   1.00800           0   0.00000     -0.301140E-02
    1269 2S   146  ILE  C      20   0.510000       12.0110           0   0.00000     -0.301140E-02
    1270 2S   146  ILE  O      70  -0.510000       15.9990           0   0.00000     -0.301140E-02
    1271 2S   147  GLY  N      54  -0.470000       14.0070           0   0.00000     -0.301140E-02
    1272 2S   147  GLY  HN      1   0.310000       1.00800           0   0.00000     -0.301140E-02
    1273 2S   147  GLY  CA     23  -0.200000E-01   12.0110           0   0.00000     -0.301140E-02
    1274 2S   147  GLY  HA1     6   0.900000E-01   1.00800           0   0.00000     -0.301140E-02
    1275 2S   147  GLY  HA2     6   0.900000E-01   1.00800           0   0.00000     -0.301140E-02
    1276 2S   147  GLY  C      20   0.510000       12.0110           0   0.00000     -0.301140E-02
    1277 2S   147  GLY  O      70  -0.510000       15.9990           0   0.00000     -0.301140E-02
    1278 2S   148  THR  N      54  -0.470000       14.0070           0   0.00000     -0.301140E-02
    1279 2S   148  THR  HN      1   0.310000       1.00800           0   0.00000     -0.301140E-02
    1280 2S   148  THR  CA     22   0.700000E-01   12.0110           0   0.00000     -0.301140E-02
    1281 2S   148  THR  HA      6   0.900000E-01   1.00800           0   0.00000     -0.301140E-02
    1282 2S   148  THR  CB     22   0.140000       12.0110           0   0.00000     -0.301140E-02
    1283 2S   148  THR  HB      3   0.900000E-01   1.00800           0   0.00000     -0.301140E-02
    1284 2S   148  THR  OG1    73  -0.660000       15.9990           0   0.00000     -0.301140E-02
    1285 2S   148  THR  HG1     1   0.430000       1.00800           0   0.00000     -0.301140E-02
    1286 2S   148  THR  CG2    24  -0.270000       12.0110           0   0.00000     -0.301140E-02
    1287 2S   148  THR  HG21    3   0.900000E-01   1.00800           0   0.00000     -0.301140E-02
    1288 2S   148  THR  HG22    3   0.900000E-01   1.00800           0   0.00000     -0.301140E-02
    1289 2S   148  THR  HG23    3   0.900000E-01   1.00800           0   0.00000     -0.301140E-02
    1290 2S   148  THR  C      20   0.510000       12.0110           0   0.00000     -0.301140E-02
    1291 2S   148  THR  O      70  -0.510000       15.9990           0   0.00000     -0.301140E-02
    1292 2S   149  ARG  N      54  -0.470000       14.0070           0   0.00000     -0.301140E-02
    1293 2S   149  ARG  HN      1   0.310000       1.00800           0   0.00000     -0.301140E-02
    1294 2S   149  ARG  CA     22   0.700000E-01   12.0110           0   0.00000     -0.301140E-02
    1295 2S   149  ARG  HA      6   0.900000E-01   1.00800           0   0.00000     -0.301140E-02
    1296 2S   149  ARG  CB     23  -0.180000       12.0110           0   0.00000     -0.301140E-02
    1297 2S   149  ARG  HB1     3   0.900000E-01   1.00800           0   0.00000     -0.301140E-02
    1298 2S   149  ARG  HB2     3   0.900000E-01   1.00800           0   0.00000     -0.301140E-02
    1299 2S   149  ARG  CG     23  -0.180000       12.0110           0   0.00000     -0.301140E-02
    1300 2S   149  ARG  HG1     3   0.900000E-01   1.00800           0   0.00000     -0.301140E-02
    1301 2S   149  ARG  HG2     3   0.900000E-01   1.00800           0   0.00000     -0.301140E-02
    1302 2S   149  ARG  CD     23   0.200000       12.0110           0   0.00000     -0.301140E-02
    1303 2S   149  ARG  HD1     3   0.900000E-01   1.00800           0   0.00000     -0.301140E-02
    1304 2S   149  ARG  HD2     3   0.900000E-01   1.00800           0   0.00000     -0.301140E-02
    1305 2S   149  ARG  NE     57  -0.700000       14.0070           0   0.00000     -0.301140E-02
    1306 2S   149  ARG  HE      2   0.440000       1.00800           0   0.00000     -0.301140E-02
    1307 2S   149  ARG  CZ     20   0.640000       12.0110           0   0.00000     -0.301140E-02
    1308 2S   149  ARG  NH1    57  -0.800000       14.0070           0   0.00000     -0.301140E-02
    1309 2S   149  ARG  HH11    2   0.460000       1.00800           0   0.00000     -0.301140E-02
    1310 2S   149  ARG  HH12    2   0.460000       1.00800           0   0.00000     -0.301140E-02
    1311 2S   149  ARG  NH2    57  -0.800000       14.0070           0   0.00000     -0.301140E-02
    1312 2S   149  ARG  HH21    2   0.460000       1.00800           0   0.00000     -0.301140E-02
    1313 2S   149  ARG  HH22    2   0.460000       1.00800           0   0.00000     -0.301140E-02
    1314 2S   149  ARG  C      32   0.340000       12.0110           0   0.00000     -0.301140E-02
    1315 2S   149  ARG  OT1    72  -0.670000       15.9990           0   0.00000       0.00000    
    1316 2S   149  ARG  OT2    72  -0.670000       15.9990           0   0.00000     -0.301140E-02
    1317 3S   156  ALA  N      56  -0.300000       14.0070           0   0.00000     -0.301140E-02
    1318 3S   156  ALA  HT1     2   0.330000       1.00800           0   0.00000     -0.301140E-02
    1319 3S   156  ALA  HT2     2   0.330000       1.00800           0   0.00000     -0.301140E-02
    1320 3S   156  ALA  HT3     2   0.330000       1.00800           0   0.00000     -0.301140E-02
    1321 3S   156  ALA  CA     22   0.210000       12.0110           0   0.00000     -0.301140E-02
    1322 3S   156  ALA  HA      6   0.100000       1.00800           0   0.00000     -0.301140E-02
    1323 3S   156  ALA  CB     24  -0.270000       12.0110           0   0.00000     -0.301140E-02
    1324 3S   156  ALA  HB1     3   0.900000E-01   1.00800           0   0.00000     -0.301140E-02
    1325 3S   156  ALA  HB2     3   0.900000E-01   1.00800           0   0.00000     -0.301140E-02
    1326 3S   156  ALA  HB3     3   0.900000E-01   1.00800           0   0.00000     -0.301140E-02
    1327 3S   156  ALA  C      20   0.510000       12.0110           0   0.00000     -0.301140E-02
    1328 3S   156  ALA  O      70  -0.510000       15.9990           0   0.00000     -0.301140E-02
    1329 3S   157  ILE  N      54  -0.470000       14.0070           0   0.00000     -0.301140E-02
    1330 3S   157  ILE  HN      1   0.310000       1.00800           0   0.00000     -0.301140E-02
    1331 3S   157  ILE  CA     22   0.700000E-01   12.0110           0   0.00000     -0.301140E-02
    1332 3S   157  ILE  HA      6   0.900000E-01   1.00800           0   0.00000     -0.301140E-02
    1333 3S   157  ILE  CB     22  -0.900000E-01   12.0110           0   0.00000     -0.301140E-02
    1334 3S   157  ILE  HB      3   0.900000E-01   1.00800           0   0.00000     -0.301140E-02
    1335 3S   157  ILE  CG2    24  -0.270000       12.0110           0   0.00000     -0.301140E-02
    1336 3S   157  ILE  HG21    3   0.900000E-01   1.00800           0   0.00000     -0.301140E-02
    1337 3S   157  ILE  HG22    3   0.900000E-01   1.00800           0   0.00000     -0.301140E-02
    1338 3S   157  ILE  HG23    3   0.900000E-01   1.00800           0   0.00000     -0.301140E-02
    1339 3S   157  ILE  CG1    23  -0.180000       12.0110           0   0.00000     -0.301140E-02
    1340 3S   157  ILE  HG11    3   0.900000E-01   1.00800           0   0.00000     -0.301140E-02
    1341 3S   157  ILE  HG12    3   0.900000E-01   1.00800           0   0.00000     -0.301140E-02
    1342 3S   157  ILE  CD     24  -0.270000       12.0110           0   0.00000     -0.301140E-02
    1343 3S   157  ILE  HD1     3   0.900000E-01   1.00800           0   0.00000     -0.301140E-02
    1344 3S   157  ILE  HD2     3   0.900000E-01   1.00800           0   0.00000     -0.301140E-02
    1345 3S   157  ILE  HD3     3   0.900000E-01   1.00800           0   0.00000     -0.301140E-02
    1346 3S   157  ILE  C      20   0.510000       12.0110           0   0.00000     -0.301140E-02
    1347 3S   157  ILE  O      70  -0.510000       15.9990           0   0.00000     -0.301140E-02
    1348 3S   158  VAL  N      54  -0.470000       14.0070           0   0.00000     -0.301140E-02
    1349 3S   158  VAL  HN      1   0.310000       1.00800           0   0.00000     -0.301140E-02
    1350 3S   158  VAL  CA     22   0.700000E-01   12.0110           0   0.00000     -0.301140E-02
    1351 3S   158  VAL  HA      6   0.900000E-01   1.00800           0   0.00000     -0.301140E-02
    1352 3S   158  VAL  CB     22  -0.900000E-01   12.0110           0   0.00000     -0.301140E-02
    1353 3S   158  VAL  HB      3   0.900000E-01   1.00800           0   0.00000     -0.301140E-02
    1354 3S   158  VAL  CG1    24  -0.270000       12.0110           0   0.00000     -0.301140E-02
    1355 3S   158  VAL  HG11    3   0.900000E-01   1.00800           0   0.00000     -0.301140E-02
    1356 3S   158  VAL  HG12    3   0.900000E-01   1.00800           0   0.00000     -0.301140E-02
    1357 3S   158  VAL  HG13    3   0.900000E-01   1.00800           0   0.00000     -0.301140E-02
    1358 3S   158  VAL  CG2    24  -0.270000       12.0110           0   0.00000     -0.301140E-02
    1359 3S   158  VAL  HG21    3   0.900000E-01   1.00800           0   0.00000     -0.301140E-02
    1360 3S   158  VAL  HG22    3   0.900000E-01   1.00800           0   0.00000     -0.301140E-02
    1361 3S   158  VAL  HG23    3   0.900000E-01   1.00800           0   0.00000     -0.301140E-02
    1362 3S   158  VAL  C      20   0.510000       12.0110           0   0.00000     -0.301140E-02
    1363 3S   158  VAL  O      70  -0.510000       15.9990           0   0.00000     -0.301140E-02
    1364 3S   159  LEU  N      54  -0.470000       14.0070           0   0.00000     -0.301140E-02
    1365 3S   159  LEU  HN      1   0.310000       1.00800           0   0.00000     -0.301140E-02
    1366 3S   159  LEU  CA     22   0.700000E-01   12.0110           0   0.00000     -0.301140E-02
    1367 3S   159  LEU  HA      6   0.900000E-01   1.00800           0   0.00000     -0.301140E-02
    1368 3S   159  LEU  CB     23  -0.180000       12.0110           0   0.00000     -0.301140E-02
    1369 3S   159  LEU  HB1     3   0.900000E-01   1.00800           0   0.00000     -0.301140E-02
    1370 3S   159  LEU  HB2     3   0.900000E-01   1.00800           0   0.00000     -0.301140E-02
    1371 3S   159  LEU  CG     22  -0.900000E-01   12.0110           0   0.00000     -0.301140E-02
    1372 3S   159  LEU  HG      3   0.900000E-01   1.00800           0   0.00000     -0.301140E-02
    1373 3S   159  LEU  CD1    24  -0.270000       12.0110           0   0.00000     -0.301140E-02
    1374 3S   159  LEU  HD11    3   0.900000E-01   1.00800           0   0.00000     -0.301140E-02
    1375 3S   159  LEU  HD12    3   0.900000E-01   1.00800           0   0.00000     -0.301140E-02
    1376 3S   159  LEU  HD13    3   0.900000E-01   1.00800           0   0.00000     -0.301140E-02
    1377 3S   159  LEU  CD2    24  -0.270000       12.0110           0   0.00000     -0.301140E-02
    1378 3S   159  LEU  HD21    3   0.900000E-01   1.00800           0   0.00000     -0.301140E-02
    1379 3S   159  LEU  HD22    3   0.900000E-01   1.00800           0   0.00000     -0.301140E-02
    1380 3S   159  LEU  HD23    3   0.900000E-01   1.00800           0   0.00000     -0.301140E-02
    1381 3S   159  LEU  C      20   0.510000       12.0110           0   0.00000     -0.301140E-02
    1382 3S   159  LEU  O      70  -0.510000       15.9990           0   0.00000     -0.301140E-02
    1383 3S   160  GLN  N      54  -0.470000       14.0070           0   0.00000     -0.301140E-02
    1384 3S   160  GLN  HN      1   0.310000       1.00800           0   0.00000     -0.301140E-02
    1385 3S   160  GLN  CA     22   0.700000E-01   12.0110           0   0.00000     -0.301140E-02
    1386 3S   160  GLN  HA      6   0.900000E-01   1.00800           0   0.00000     -0.301140E-02
    1387 3S   160  GLN  CB     23  -0.180000       12.0110           0   0.00000     -0.301140E-02
    1388 3S   160  GLN  HB1     3   0.900000E-01   1.00800           0   0.00000     -0.301140E-02
    1389 3S   160  GLN  HB2     3   0.900000E-01   1.00800           0   0.00000     -0.301140E-02
    1390 3S   160  GLN  CG     23  -0.180000       12.0110           0   0.00000     -0.301140E-02
    1391 3S   160  GLN  HG1     3   0.900000E-01   1.00800           0   0.00000     -0.301140E-02
    1392 3S   160  GLN  HG2     3   0.900000E-01   1.00800           0   0.00000     -0.301140E-02
    1393 3S   160  GLN  CD     32   0.550000       12.0110           0   0.00000     -0.301140E-02
    1394 3S   160  GLN  OE1    70  -0.550000       15.9990           0   0.00000     -0.301140E-02
    1395 3S   160  GLN  NE2    55  -0.620000       14.0070           0   0.00000     -0.301140E-02
    1396 3S   160  GLN  HE21    1   0.320000       1.00800           0   0.00000     -0.301140E-02
    1397 3S   160  GLN  HE22    1   0.300000       1.00800           0   0.00000     -0.301140E-02
    1398 3S   160  GLN  C      20   0.510000       12.0110           0   0.00000     -0.301140E-02
    1399 3S   160  GLN  O      70  -0.510000       15.9990           0   0.00000     -0.301140E-02
    1400 3S   161  LEU  N      54  -0.470000       14.0070           0   0.00000     -0.301140E-02
    1401 3S   161  LEU  HN      1   0.310000       1.00800           0   0.00000     -0.301140E-02
    1402 3S   161  LEU  CA     22   0.700000E-01   12.0110           0   0.00000     -0.301140E-02
    1403 3S   161  LEU  HA      6   0.900000E-01   1.00800           0   0.00000     -0.301140E-02
    1404 3S   161  LEU  CB     23  -0.180000       12.0110           0   0.00000     -0.301140E-02
    1405 3S   161  LEU  HB1     3   0.900000E-01   1.00800           0   0.00000     -0.301140E-02
    1406 3S   161  LEU  HB2     3   0.900000E-01   1.00800           0   0.00000     -0.301140E-02
    1407 3S   161  LEU  CG     22  -0.900000E-01   12.0110           0   0.00000     -0.301140E-02
    1408 3S   161  LEU  HG      3   0.900000E-01   1.00800           0   0.00000     -0.301140E-02
    1409 3S   161  LEU  CD1    24  -0.270000       12.0110           0   0.00000     -0.301140E-02
    1410 3S   161  LEU  HD11    3   0.900000E-01   1.00800           0   0.00000     -0.301140E-02
    1411 3S   161  LEU  HD12    3   0.900000E-01   1.00800           0   0.00000     -0.301140E-02
    1412 3S   161  LEU  HD13    3   0.900000E-01   1.00800           0   0.00000     -0.301140E-02
    1413 3S   161  LEU  CD2    24  -0.270000       12.0110           0   0.00000     -0.301140E-02
    1414 3S   161  LEU  HD21    3   0.900000E-01   1.00800           0   0.00000     -0.301140E-02
    1415 3S   161  LEU  HD22    3   0.900000E-01   1.00800           0   0.00000     -0.301140E-02
    1416 3S   161  LEU  HD23    3   0.900000E-01   1.00800           0   0.00000     -0.301140E-02
    1417 3S   161  LEU  C      20   0.510000       12.0110           0   0.00000     -0.301140E-02
    1418 3S   161  LEU  O      70  -0.510000       15.9990           0   0.00000     -0.301140E-02
    1419 3S   162  PRO  N      50  -0.290000       14.0070           0   0.00000     -0.301140E-02
    1420 3S   162  PRO  CD     31    0.00000       12.0110           0   0.00000     -0.301140E-02
    1421 3S   162  PRO  HD1     3   0.900000E-01   1.00800           0   0.00000     -0.301140E-02
    1422 3S   162  PRO  HD2     3   0.900000E-01   1.00800           0   0.00000     -0.301140E-02
    1423 3S   162  PRO  CA     29   0.200000E-01   12.0110           0   0.00000     -0.301140E-02
    1424 3S   162  PRO  HA      6   0.900000E-01   1.00800           0   0.00000     -0.301140E-02
    1425 3S   162  PRO  CB     30  -0.180000       12.0110           0   0.00000     -0.301140E-02
    1426 3S   162  PRO  HB1     3   0.900000E-01   1.00800           0   0.00000     -0.301140E-02
    1427 3S   162  PRO  HB2     3   0.900000E-01   1.00800           0   0.00000     -0.301140E-02
    1428 3S   162  PRO  CG     30  -0.180000       12.0110           0   0.00000     -0.301140E-02
    1429 3S   162  PRO  HG1     3   0.900000E-01   1.00800           0   0.00000     -0.301140E-02
    1430 3S   162  PRO  HG2     3   0.900000E-01   1.00800           0   0.00000     -0.301140E-02
    1431 3S   162  PRO  C      20   0.510000       12.0110           0   0.00000     -0.301140E-02
    1432 3S   162  PRO  O      70  -0.510000       15.9990           0   0.00000     -0.301140E-02
    1433 3S   163  GLN  N      54  -0.470000       14.0070           0   0.00000     -0.301140E-02
    1434 3S   163  GLN  HN      1   0.310000       1.00800           0   0.00000     -0.301140E-02
    1435 3S   163  GLN  CA     22   0.700000E-01   12.0110           0   0.00000     -0.301140E-02
    1436 3S   163  GLN  HA      6   0.900000E-01   1.00800           0   0.00000     -0.301140E-02
    1437 3S   163  GLN  CB     23  -0.180000       12.0110           0   0.00000     -0.301140E-02
    1438 3S   163  GLN  HB1     3   0.900000E-01   1.00800           0   0.00000     -0.301140E-02
    1439 3S   163  GLN  HB2     3   0.900000E-01   1.00800           0   0.00000     -0.301140E-02
    1440 3S   163  GLN  CG     23  -0.180000       12.0110           0   0.00000     -0.301140E-02
    1441 3S   163  GLN  HG1     3   0.900000E-01   1.00800           0   0.00000     -0.301140E-02
    1442 3S   163  GLN  HG2     3   0.900000E-01   1.00800           0   0.00000     -0.301140E-02
    1443 3S   163  GLN  CD     32   0.550000       12.0110           0   0.00000     -0.301140E-02
    1444 3S   163  GLN  OE1    70  -0.550000       15.9990           0   0.00000     -0.301140E-02
    1445 3S   163  GLN  NE2    55  -0.620000       14.0070           0   0.00000     -0.301140E-02
    1446 3S   163  GLN  HE21    1   0.320000       1.00800           0   0.00000     -0.301140E-02
    1447 3S   163  GLN  HE22    1   0.300000       1.00800           0   0.00000     -0.301140E-02
    1448 3S   163  GLN  C      20   0.510000       12.0110           0   0.00000     -0.301140E-02
    1449 3S   163  GLN  O      70  -0.510000       15.9990           0   0.00000     -0.301140E-02
    1450 3S   164  GLY  N      54  -0.470000       14.0070           0   0.00000     -0.301140E-02
    1451 3S   164  GLY  HN      1   0.310000       1.00800           0   0.00000     -0.301140E-02
    1452 3S   164  GLY  CA     23  -0.200000E-01   12.0110           0   0.00000     -0.301140E-02
    1453 3S   164  GLY  HA1     6   0.900000E-01   1.00800           0   0.00000     -0.301140E-02
    1454 3S   164  GLY  HA2     6   0.900000E-01   1.00800           0   0.00000     -0.301140E-02
    1455 3S   164  GLY  C      20   0.510000       12.0110           0   0.00000     -0.301140E-02
    1456 3S   164  GLY  O      70  -0.510000       15.9990           0   0.00000     -0.301140E-02
    1457 3S   165  THR  N      54  -0.470000       14.0070           0   0.00000     -0.301140E-02
    1458 3S   165  THR  HN      1   0.310000       1.00800           0   0.00000     -0.301140E-02
    1459 3S   165  THR  CA     22   0.700000E-01   12.0110           0   0.00000     -0.301140E-02
    1460 3S   165  THR  HA      6   0.900000E-01   1.00800           0   0.00000     -0.301140E-02
    1461 3S   165  THR  CB     22   0.140000       12.0110           0   0.00000     -0.301140E-02
    1462 3S   165  THR  HB      3   0.900000E-01   1.00800           0   0.00000     -0.301140E-02
    1463 3S   165  THR  OG1    73  -0.660000       15.9990           0   0.00000     -0.301140E-02
    1464 3S   165  THR  HG1     1   0.430000       1.00800           0   0.00000     -0.301140E-02
    1465 3S   165  THR  CG2    24  -0.270000       12.0110           0   0.00000     -0.301140E-02
    1466 3S   165  THR  HG21    3   0.900000E-01   1.00800           0   0.00000     -0.301140E-02
    1467 3S   165  THR  HG22    3   0.900000E-01   1.00800           0   0.00000     -0.301140E-02
    1468 3S   165  THR  HG23    3   0.900000E-01   1.00800           0   0.00000     -0.301140E-02
    1469 3S   165  THR  C      20   0.510000       12.0110           0   0.00000     -0.301140E-02
    1470 3S   165  THR  O      70  -0.510000       15.9990           0   0.00000     -0.301140E-02
    1471 3S   166  THR  N      54  -0.470000       14.0070           0   0.00000     -0.301140E-02
    1472 3S   166  THR  HN      1   0.310000       1.00800           0   0.00000     -0.301140E-02
    1473 3S   166  THR  CA     22   0.700000E-01   12.0110           0   0.00000     -0.301140E-02
    1474 3S   166  THR  HA      6   0.900000E-01   1.00800           0   0.00000     -0.301140E-02
    1475 3S   166  THR  CB     22   0.140000       12.0110           0   0.00000     -0.301140E-02
    1476 3S   166  THR  HB      3   0.900000E-01   1.00800           0   0.00000     -0.301140E-02
    1477 3S   166  THR  OG1    73  -0.660000       15.9990           0   0.00000     -0.301140E-02
    1478 3S   166  THR  HG1     1   0.430000       1.00800           0   0.00000     -0.301140E-02
    1479 3S   166  THR  CG2    24  -0.270000       12.0110           0   0.00000     -0.301140E-02
    1480 3S   166  THR  HG21    3   0.900000E-01   1.00800           0   0.00000     -0.301140E-02
    1481 3S   166  THR  HG22    3   0.900000E-01   1.00800           0   0.00000     -0.301140E-02
    1482 3S   166  THR  HG23    3   0.900000E-01   1.00800           0   0.00000     -0.301140E-02
    1483 3S   166  THR  C      20   0.510000       12.0110           0   0.00000     -0.301140E-02
    1484 3S   166  THR  O      70  -0.510000       15.9990           0   0.00000     -0.301140E-02
    1485 3S   167  LEU  N      54  -0.470000       14.0070           0   0.00000     -0.301140E-02
    1486 3S   167  LEU  HN      1   0.310000       1.00800           0   0.00000     -0.301140E-02
    1487 3S   167  LEU  CA     22   0.700000E-01   12.0110           0   0.00000     -0.301140E-02
    1488 3S   167  LEU  HA      6   0.900000E-01   1.00800           0   0.00000     -0.301140E-02
    1489 3S   167  LEU  CB     23  -0.180000       12.0110           0   0.00000     -0.301140E-02
    1490 3S   167  LEU  HB1     3   0.900000E-01   1.00800           0   0.00000     -0.301140E-02
    1491 3S   167  LEU  HB2     3   0.900000E-01   1.00800           0   0.00000     -0.301140E-02
    1492 3S   167  LEU  CG     22  -0.900000E-01   12.0110           0   0.00000     -0.301140E-02
    1493 3S   167  LEU  HG      3   0.900000E-01   1.00800           0   0.00000     -0.301140E-02
    1494 3S   167  LEU  CD1    24  -0.270000       12.0110           0   0.00000     -0.301140E-02
    1495 3S   167  LEU  HD11    3   0.900000E-01   1.00800           0   0.00000     -0.301140E-02
    1496 3S   167  LEU  HD12    3   0.900000E-01   1.00800           0   0.00000     -0.301140E-02
    1497 3S   167  LEU  HD13    3   0.900000E-01   1.00800           0   0.00000     -0.301140E-02
    1498 3S   167  LEU  CD2    24  -0.270000       12.0110           0   0.00000     -0.301140E-02
    1499 3S   167  LEU  HD21    3   0.900000E-01   1.00800           0   0.00000     -0.301140E-02
    1500 3S   167  LEU  HD22    3   0.900000E-01   1.00800           0   0.00000     -0.301140E-02
    1501 3S   167  LEU  HD23    3   0.900000E-01   1.00800           0   0.00000     -0.301140E-02
    1502 3S   167  LEU  C      20   0.510000       12.0110           0   0.00000     -0.301140E-02
    1503 3S   167  LEU  O      70  -0.510000       15.9990           0   0.00000     -0.301140E-02
    1504 3S   168  PRO  N      50  -0.290000       14.0070           0   0.00000     -0.301140E-02
    1505 3S   168  PRO  CD     31    0.00000       12.0110           0   0.00000     -0.301140E-02
    1506 3S   168  PRO  HD1     3   0.900000E-01   1.00800           0   0.00000     -0.301140E-02
    1507 3S   168  PRO  HD2     3   0.900000E-01   1.00800           0   0.00000     -0.301140E-02
    1508 3S   168  PRO  CA     29   0.200000E-01   12.0110           0   0.00000     -0.301140E-02
    1509 3S   168  PRO  HA      6   0.900000E-01   1.00800           0   0.00000     -0.301140E-02
    1510 3S   168  PRO  CB     30  -0.180000       12.0110           0   0.00000     -0.301140E-02
    1511 3S   168  PRO  HB1     3   0.900000E-01   1.00800           0   0.00000     -0.301140E-02
    1512 3S   168  PRO  HB2     3   0.900000E-01   1.00800           0   0.00000     -0.301140E-02
    1513 3S   168  PRO  CG     30  -0.180000       12.0110           0   0.00000     -0.301140E-02
    1514 3S   168  PRO  HG1     3   0.900000E-01   1.00800           0   0.00000     -0.301140E-02
    1515 3S   168  PRO  HG2     3   0.900000E-01   1.00800           0   0.00000     -0.301140E-02
    1516 3S   168  PRO  C      20   0.510000       12.0110           0   0.00000     -0.301140E-02
    1517 3S   168  PRO  O      70  -0.510000       15.9990           0   0.00000     -0.301140E-02
    1518 3S   169  LYS  N      54  -0.470000       14.0070           0   0.00000     -0.301140E-02
    1519 3S   169  LYS  HN      1   0.310000       1.00800           0   0.00000     -0.301140E-02
    1520 3S   169  LYS  CA     22   0.700000E-01   12.0110           0   0.00000     -0.301140E-02
    1521 3S   169  LYS  HA      6   0.900000E-01   1.00800           0   0.00000     -0.301140E-02
    1522 3S   169  LYS  CB     23  -0.180000       12.0110           0   0.00000     -0.301140E-02
    1523 3S   169  LYS  HB1     3   0.900000E-01   1.00800           0   0.00000     -0.301140E-02
    1524 3S   169  LYS  HB2     3   0.900000E-01   1.00800           0   0.00000     -0.301140E-02
    1525 3S   169  LYS  CG     23  -0.180000       12.0110           0   0.00000     -0.301140E-02
    1526 3S   169  LYS  HG1     3   0.900000E-01   1.00800           0   0.00000     -0.301140E-02
    1527 3S   169  LYS  HG2     3   0.900000E-01   1.00800           0   0.00000     -0.301140E-02
    1528 3S   169  LYS  CD     23  -0.180000       12.0110           0   0.00000     -0.301140E-02
    1529 3S   169  LYS  HD1     3   0.900000E-01   1.00800           0   0.00000     -0.301140E-02
    1530 3S   169  LYS  HD2     3   0.900000E-01   1.00800           0   0.00000     -0.301140E-02
    1531 3S   169  LYS  CE     23   0.210000       12.0110           0   0.00000     -0.301140E-02
    1532 3S   169  LYS  HE1     3   0.500000E-01   1.00800           0   0.00000     -0.301140E-02
    1533 3S   169  LYS  HE2     3   0.500000E-01   1.00800           0   0.00000     -0.301140E-02
    1534 3S   169  LYS  NZ     56  -0.300000       14.0070           0   0.00000     -0.301140E-02
    1535 3S   169  LYS  HZ1     2   0.330000       1.00800           0   0.00000     -0.301140E-02
    1536 3S   169  LYS  HZ2     2   0.330000       1.00800           0   0.00000     -0.301140E-02
    1537 3S   169  LYS  HZ3     2   0.330000       1.00800           0   0.00000     -0.301140E-02
    1538 3S   169  LYS  C      20   0.510000       12.0110           0   0.00000     -0.301140E-02
    1539 3S   169  LYS  O      70  -0.510000       15.9990           0   0.00000     -0.301140E-02
    1540 3S   170  GLY  N      54  -0.470000       14.0070           0   0.00000     -0.301140E-02
    1541 3S   170  GLY  HN      1   0.310000       1.00800           0   0.00000     -0.301140E-02
    1542 3S   170  GLY  CA     23  -0.200000E-01   12.0110           0   0.00000     -0.301140E-02
    1543 3S   170  GLY  HA1     6   0.900000E-01   1.00800           0   0.00000     -0.301140E-02
    1544 3S   170  GLY  HA2     6   0.900000E-01   1.00800           0   0.00000     -0.301140E-02
    1545 3S   170  GLY  C      20   0.510000       12.0110           0   0.00000     -0.301140E-02
    1546 3S   170  GLY  O      70  -0.510000       15.9990           0   0.00000     -0.301140E-02
    1547 3S   171  PHE  N      54  -0.470000       14.0070           0   0.00000     -0.301140E-02
    1548 3S   171  PHE  HN      1   0.310000       1.00800           0   0.00000     -0.301140E-02
    1549 3S   171  PHE  CA     22   0.700000E-01   12.0110           0   0.00000     -0.301140E-02
    1550 3S   171  PHE  HA      6   0.900000E-01   1.00800           0   0.00000     -0.301140E-02
    1551 3S   171  PHE  CB     23  -0.180000       12.0110           0   0.00000     -0.301140E-02
    1552 3S   171  PHE  HB1     3   0.900000E-01   1.00800           0   0.00000     -0.301140E-02
    1553 3S   171  PHE  HB2     3   0.900000E-01   1.00800           0   0.00000     -0.301140E-02
    1554 3S   171  PHE  CG     21    0.00000       12.0110           0   0.00000     -0.301140E-02
    1555 3S   171  PHE  CD1    21  -0.115000       12.0110           0   0.00000     -0.301140E-02
    1556 3S   171  PHE  HD1     5   0.115000       1.00800           0   0.00000     -0.301140E-02
    1557 3S   171  PHE  CE1    21  -0.115000       12.0110           0   0.00000     -0.301140E-02
    1558 3S   171  PHE  HE1     5   0.115000       1.00800           0   0.00000     -0.301140E-02
    1559 3S   171  PHE  CZ     21  -0.115000       12.0110           0   0.00000     -0.301140E-02
    1560 3S   171  PHE  HZ      5   0.115000       1.00800           0   0.00000     -0.301140E-02
    1561 3S   171  PHE  CD2    21  -0.115000       12.0110           0   0.00000     -0.301140E-02
    1562 3S   171  PHE  HD2     5   0.115000       1.00800           0   0.00000     -0.301140E-02
    1563 3S   171  PHE  CE2    21  -0.115000       12.0110           0   0.00000     -0.301140E-02
    1564 3S   171  PHE  HE2     5   0.115000       1.00800           0   0.00000     -0.301140E-02
    1565 3S   171  PHE  C      20   0.510000       12.0110           0   0.00000     -0.301140E-02
    1566 3S   171  PHE  O      70  -0.510000       15.9990           0   0.00000     -0.301140E-02
    1567 3S   172  TYR  N      54  -0.470000       14.0070           0   0.00000     -0.301140E-02
    1568 3S   172  TYR  HN      1   0.310000       1.00800           0   0.00000     -0.301140E-02
    1569 3S   172  TYR  CA     22   0.700000E-01   12.0110           0   0.00000     -0.301140E-02
    1570 3S   172  TYR  HA      6   0.900000E-01   1.00800           0   0.00000     -0.301140E-02
    1571 3S   172  TYR  CB     23  -0.180000       12.0110           0   0.00000     -0.301140E-02
    1572 3S   172  TYR  HB1     3   0.900000E-01   1.00800           0   0.00000     -0.301140E-02
    1573 3S   172  TYR  HB2     3   0.900000E-01   1.00800           0   0.00000     -0.301140E-02
    1574 3S   172  TYR  CG     21    0.00000       12.0110           0   0.00000     -0.301140E-02
    1575 3S   172  TYR  CD1    21  -0.115000       12.0110           0   0.00000     -0.301140E-02
    1576 3S   172  TYR  HD1     5   0.115000       1.00800           0   0.00000     -0.301140E-02
    1577 3S   172  TYR  CE1    21  -0.115000       12.0110           0   0.00000     -0.301140E-02
    1578 3S   172  TYR  HE1     5   0.115000       1.00800           0   0.00000     -0.301140E-02
    1579 3S   172  TYR  CZ     21   0.110000       12.0110           0   0.00000     -0.301140E-02
    1580 3S   172  TYR  OH     73  -0.540000       15.9990           0   0.00000     -0.301140E-02
    1581 3S   172  TYR  HH      1   0.430000       1.00800           0   0.00000     -0.301140E-02
    1582 3S   172  TYR  CD2    21  -0.115000       12.0110           0   0.00000     -0.301140E-02
    1583 3S   172  TYR  HD2     5   0.115000       1.00800           0   0.00000     -0.301140E-02
    1584 3S   172  TYR  CE2    21  -0.115000       12.0110           0   0.00000     -0.301140E-02
    1585 3S   172  TYR  HE2     5   0.115000       1.00800           0   0.00000     -0.301140E-02
    1586 3S   172  TYR  C      20   0.510000       12.0110           0   0.00000     -0.301140E-02
    1587 3S   172  TYR  O      70  -0.510000       15.9990           0   0.00000     -0.301140E-02
    1588 3S   173  ALA  N      54  -0.470000       14.0070           0   0.00000     -0.301140E-02
    1589 3S   173  ALA  HN      1   0.310000       1.00800           0   0.00000     -0.301140E-02
    1590 3S   173  ALA  CA     22   0.700000E-01   12.0110           0   0.00000     -0.301140E-02
    1591 3S   173  ALA  HA      6   0.900000E-01   1.00800           0   0.00000     -0.301140E-02
    1592 3S   173  ALA  CB     24  -0.270000       12.0110           0   0.00000     -0.301140E-02
    1593 3S   173  ALA  HB1     3   0.900000E-01   1.00800           0   0.00000     -0.301140E-02
    1594 3S   173  ALA  HB2     3   0.900000E-01   1.00800           0   0.00000     -0.301140E-02
    1595 3S   173  ALA  HB3     3   0.900000E-01   1.00800           0   0.00000     -0.301140E-02
    1596 3S   173  ALA  C      32   0.340000       12.0110           0   0.00000     -0.301140E-02
    1597 3S   173  ALA  OT1    72  -0.670000       15.9990           0   0.00000       0.00000    
    1598 3S   173  ALA  OT2    72  -0.670000       15.9990           0   0.00000     -0.301140E-02
    1599 4S   48   ASN  N      56  -0.300000       14.0070           0   0.00000     -0.301140E-02
    1600 4S   48   ASN  HT1     2   0.330000       1.00800           0   0.00000     -0.301140E-02
    1601 4S   48   ASN  HT2     2   0.330000       1.00800           0   0.00000     -0.301140E-02
    1602 4S   48   ASN  HT3     2   0.330000       1.00800           0   0.00000     -0.301140E-02
    1603 4S   48   ASN  CA     22   0.210000       12.0110           0   0.00000     -0.301140E-02
    1604 4S   48   ASN  HA      6   0.100000       1.00800           0   0.00000     -0.301140E-02
    1605 4S   48   ASN  CB     23  -0.180000       12.0110           0   0.00000     -0.301140E-02
    1606 4S   48   ASN  HB1     3   0.900000E-01   1.00800           0   0.00000     -0.301140E-02
    1607 4S   48   ASN  HB2     3   0.900000E-01   1.00800           0   0.00000     -0.301140E-02
    1608 4S   48   ASN  CG     32   0.550000       12.0110           0   0.00000     -0.301140E-02
    1609 4S   48   ASN  OD1    70  -0.550000       15.9990           0   0.00000     -0.301140E-02
    1610 4S   48   ASN  ND2    55  -0.620000       14.0070           0   0.00000     -0.301140E-02
    1611 4S   48   ASN  HD21    1   0.320000       1.00800           0   0.00000     -0.301140E-02
    1612 4S   48   ASN  HD22    1   0.300000       1.00800           0   0.00000     -0.301140E-02
    1613 4S   48   ASN  C      20   0.510000       12.0110           0   0.00000     -0.301140E-02
    1614 4S   48   ASN  O      70  -0.510000       15.9990           0   0.00000     -0.301140E-02
    1615 4S   49   THR  N      54  -0.470000       14.0070           0   0.00000     -0.301140E-02
    1616 4S   49   THR  HN      1   0.310000       1.00800           0   0.00000     -0.301140E-02
    1617 4S   49   THR  CA     22   0.700000E-01   12.0110           0   0.00000     -0.301140E-02
    1618 4S   49   THR  HA      6   0.900000E-01   1.00800           0   0.00000     -0.301140E-02
    1619 4S   49   THR  CB     22   0.140000       12.0110           0   0.00000     -0.301140E-02
    1620 4S   49   THR  HB      3   0.900000E-01   1.00800           0   0.00000     -0.301140E-02
    1621 4S   49   THR  OG1    73  -0.660000       15.9990           0   0.00000     -0.301140E-02
    1622 4S   49   THR  HG1     1   0.430000       1.00800           0   0.00000     -0.301140E-02
    1623 4S   49   THR  CG2    24  -0.270000       12.0110           0   0.00000     -0.301140E-02
    1624 4S   49   THR  HG21    3   0.900000E-01   1.00800           0   0.00000     -0.301140E-02
    1625 4S   49   THR  HG22    3   0.900000E-01   1.00800           0   0.00000     -0.301140E-02
    1626 4S   49   THR  HG23    3   0.900000E-01   1.00800           0   0.00000     -0.301140E-02
    1627 4S   49   THR  C      20   0.510000       12.0110           0   0.00000     -0.301140E-02
    1628 4S   49   THR  O      70  -0.510000       15.9990           0   0.00000     -0.301140E-02
    1629 4S   50   ALA  N      54  -0.470000       14.0070           0   0.00000     -0.301140E-02
    1630 4S   50   ALA  HN      1   0.310000       1.00800           0   0.00000     -0.301140E-02
    1631 4S   50   ALA  CA     22   0.700000E-01   12.0110           0   0.00000     -0.301140E-02
    1632 4S   50   ALA  HA      6   0.900000E-01   1.00800           0   0.00000     -0.301140E-02
    1633 4S   50   ALA  CB     24  -0.270000       12.0110           0   0.00000     -0.301140E-02
    1634 4S   50   ALA  HB1     3   0.900000E-01   1.00800           0   0.00000     -0.301140E-02
    1635 4S   50   ALA  HB2     3   0.900000E-01   1.00800           0   0.00000     -0.301140E-02
    1636 4S   50   ALA  HB3     3   0.900000E-01   1.00800           0   0.00000     -0.301140E-02
    1637 4S   50   ALA  C      20   0.510000       12.0110           0   0.00000     -0.301140E-02
    1638 4S   50   ALA  O      70  -0.510000       15.9990           0   0.00000     -0.301140E-02
    1639 4S   51   SER  N      54  -0.470000       14.0070           0   0.00000     -0.301140E-02
    1640 4S   51   SER  HN      1   0.310000       1.00800           0   0.00000     -0.301140E-02
    1641 4S   51   SER  CA     22   0.700000E-01   12.0110           0   0.00000     -0.301140E-02
    1642 4S   51   SER  HA      6   0.900000E-01   1.00800           0   0.00000     -0.301140E-02
    1643 4S   51   SER  CB     23   0.500000E-01   12.0110           0   0.00000     -0.301140E-02
    1644 4S   51   SER  HB1     3   0.900000E-01   1.00800           0   0.00000     -0.301140E-02
    1645 4S   51   SER  HB2     3   0.900000E-01   1.00800           0   0.00000     -0.301140E-02
    1646 4S   51   SER  OG     73  -0.660000       15.9990           0   0.00000     -0.301140E-02
    1647 4S   51   SER  HG1     1   0.430000       1.00800           0   0.00000     -0.301140E-02
    1648 4S   51   SER  C      20   0.510000       12.0110           0   0.00000     -0.301140E-02
    1649 4S   51   SER  O      70  -0.510000       15.9990           0   0.00000     -0.301140E-02
    1650 4S   52   TRP  N      54  -0.470000       14.0070           0   0.00000     -0.301140E-02
    1651 4S   52   TRP  HN      1   0.310000       1.00800           0   0.00000     -0.301140E-02
    1652 4S   52   TRP  CA     22   0.700000E-01   12.0110           0   0.00000     -0.301140E-02
    1653 4S   52   TRP  HA      6   0.900000E-01   1.00800           0   0.00000     -0.301140E-02
    1654 4S   52   TRP  CB     23  -0.180000       12.0110           0   0.00000     -0.301140E-02
    1655 4S   52   TRP  HB1     3   0.900000E-01   1.00800           0   0.00000     -0.301140E-02
    1656 4S   52   TRP  HB2     3   0.900000E-01   1.00800           0   0.00000     -0.301140E-02
    1657 4S   52   TRP  CG     28  -0.300000E-01   12.0110           0   0.00000     -0.301140E-02
    1658 4S   52   TRP  CD1    21   0.350000E-01   12.0110           0   0.00000     -0.301140E-02
    1659 4S   52   TRP  HD1     5   0.115000       1.00800           0   0.00000     -0.301140E-02
    1660 4S   52   TRP  NE1    58  -0.610000       14.0070           0   0.00000     -0.301140E-02
    1661 4S   52   TRP  HE1     1   0.380000       1.00800           0   0.00000     -0.301140E-02
    1662 4S   52   TRP  CE2    27   0.130000       12.0110           0   0.00000     -0.301140E-02
    1663 4S   52   TRP  CD2    27  -0.200000E-01   12.0110           0   0.00000     -0.301140E-02
    1664 4S   52   TRP  CE3    21  -0.115000       12.0110           0   0.00000     -0.301140E-02
    1665 4S   52   TRP  HE3     5   0.115000       1.00800           0   0.00000     -0.301140E-02
    1666 4S   52   TRP  CZ3    21  -0.115000       12.0110           0   0.00000     -0.301140E-02
    1667 4S   52   TRP  HZ3     5   0.115000       1.00800           0   0.00000     -0.301140E-02
    1668 4S   52   TRP  CZ2    21  -0.115000       12.0110           0   0.00000     -0.301140E-02
    1669 4S   52   TRP  HZ2     5   0.115000       1.00800           0   0.00000     -0.301140E-02
    1670 4S   52   TRP  CH2    21  -0.115000       12.0110           0   0.00000     -0.301140E-02
    1671 4S   52   TRP  HH2     5   0.115000       1.00800           0   0.00000     -0.301140E-02
    1672 4S   52   TRP  C      20   0.510000       12.0110           0   0.00000     -0.301140E-02
    1673 4S   52   TRP  O      70  -0.510000       15.9990           0   0.00000     -0.301140E-02
    1674 4S   53   PHE  N      54  -0.470000       14.0070           0   0.00000     -0.301140E-02
    1675 4S   53   PHE  HN      1   0.310000       1.00800           0   0.00000     -0.301140E-02
    1676 4S   53   PHE  CA     22   0.700000E-01   12.0110           0   0.00000     -0.301140E-02
    1677 4S   53   PHE  HA      6   0.900000E-01   1.00800           0   0.00000     -0.301140E-02
    1678 4S   53   PHE  CB     23  -0.180000       12.0110           0   0.00000     -0.301140E-02
    1679 4S   53   PHE  HB1     3   0.900000E-01   1.00800           0   0.00000     -0.301140E-02
    1680 4S   53   PHE  HB2     3   0.900000E-01   1.00800           0   0.00000     -0.301140E-02
    1681 4S   53   PHE  CG     21    0.00000       12.0110           0   0.00000     -0.301140E-02
    1682 4S   53   PHE  CD1    21  -0.115000       12.0110           0   0.00000     -0.301140E-02
    1683 4S   53   PHE  HD1     5   0.115000       1.00800           0   0.00000     -0.301140E-02
    1684 4S   53   PHE  CE1    21  -0.115000       12.0110           0   0.00000     -0.301140E-02
    1685 4S   53   PHE  HE1     5   0.115000       1.00800           0   0.00000     -0.301140E-02
    1686 4S   53   PHE  CZ     21  -0.115000       12.0110           0   0.00000     -0.301140E-02
    1687 4S   53   PHE  HZ      5   0.115000       1.00800           0   0.00000     -0.301140E-02
    1688 4S   53   PHE  CD2    21  -0.115000       12.0110           0   0.00000     -0.301140E-02
    1689 4S   53   PHE  HD2     5   0.115000       1.00800           0   0.00000     -0.301140E-02
    1690 4S   53   PHE  CE2    21  -0.115000       12.0110           0   0.00000     -0.301140E-02
    1691 4S   53   PHE  HE2     5   0.115000       1.00800           0   0.00000     -0.301140E-02
    1692 4S   53   PHE  C      20   0.510000       12.0110           0   0.00000     -0.301140E-02
    1693 4S   53   PHE  O      70  -0.510000       15.9990           0   0.00000     -0.301140E-02
    1694 4S   54   THR  N      54  -0.470000       14.0070           0   0.00000     -0.301140E-02
    1695 4S   54   THR  HN      1   0.310000       1.00800           0   0.00000     -0.301140E-02
    1696 4S   54   THR  CA     22   0.700000E-01   12.0110           0   0.00000     -0.301140E-02
    1697 4S   54   THR  HA      6   0.900000E-01   1.00800           0   0.00000     -0.301140E-02
    1698 4S   54   THR  CB     22   0.140000       12.0110           0   0.00000     -0.301140E-02
    1699 4S   54   THR  HB      3   0.900000E-01   1.00800           0   0.00000     -0.301140E-02
    1700 4S   54   THR  OG1    73  -0.660000       15.9990           0   0.00000     -0.301140E-02
    1701 4S   54   THR  HG1     1   0.430000       1.00800           0   0.00000     -0.301140E-02
    1702 4S   54   THR  CG2    24  -0.270000       12.0110           0   0.00000     -0.301140E-02
    1703 4S   54   THR  HG21    3   0.900000E-01   1.00800           0   0.00000     -0.301140E-02
    1704 4S   54   THR  HG22    3   0.900000E-01   1.00800           0   0.00000     -0.301140E-02
    1705 4S   54   THR  HG23    3   0.900000E-01   1.00800           0   0.00000     -0.301140E-02
    1706 4S   54   THR  C      20   0.510000       12.0110           0   0.00000     -0.301140E-02
    1707 4S   54   THR  O      70  -0.510000       15.9990           0   0.00000     -0.301140E-02
    1708 4S   55   ALA  N      54  -0.470000       14.0070           0   0.00000     -0.301140E-02
    1709 4S   55   ALA  HN      1   0.310000       1.00800           0   0.00000     -0.301140E-02
    1710 4S   55   ALA  CA     22   0.700000E-01   12.0110           0   0.00000     -0.301140E-02
    1711 4S   55   ALA  HA      6   0.900000E-01   1.00800           0   0.00000     -0.301140E-02
    1712 4S   55   ALA  CB     24  -0.270000       12.0110           0   0.00000     -0.301140E-02
    1713 4S   55   ALA  HB1     3   0.900000E-01   1.00800           0   0.00000     -0.301140E-02
    1714 4S   55   ALA  HB2     3   0.900000E-01   1.00800           0   0.00000     -0.301140E-02
    1715 4S   55   ALA  HB3     3   0.900000E-01   1.00800           0   0.00000     -0.301140E-02
    1716 4S   55   ALA  C      20   0.510000       12.0110           0   0.00000     -0.301140E-02
    1717 4S   55   ALA  O      70  -0.510000       15.9990           0   0.00000     -0.301140E-02
    1718 4S   56   LEU  N      54  -0.470000       14.0070           0   0.00000     -0.301140E-02
    1719 4S   56   LEU  HN      1   0.310000       1.00800           0   0.00000     -0.301140E-02
    1720 4S   56   LEU  CA     22   0.700000E-01   12.0110           0   0.00000     -0.301140E-02
    1721 4S   56   LEU  HA      6   0.900000E-01   1.00800           0   0.00000     -0.301140E-02
    1722 4S   56   LEU  CB     23  -0.180000       12.0110           0   0.00000     -0.301140E-02
    1723 4S   56   LEU  HB1     3   0.900000E-01   1.00800           0   0.00000     -0.301140E-02
    1724 4S   56   LEU  HB2     3   0.900000E-01   1.00800           0   0.00000     -0.301140E-02
    1725 4S   56   LEU  CG     22  -0.900000E-01   12.0110           0   0.00000     -0.301140E-02
    1726 4S   56   LEU  HG      3   0.900000E-01   1.00800           0   0.00000     -0.301140E-02
    1727 4S   56   LEU  CD1    24  -0.270000       12.0110           0   0.00000     -0.301140E-02
    1728 4S   56   LEU  HD11    3   0.900000E-01   1.00800           0   0.00000     -0.301140E-02
    1729 4S   56   LEU  HD12    3   0.900000E-01   1.00800           0   0.00000     -0.301140E-02
    1730 4S   56   LEU  HD13    3   0.900000E-01   1.00800           0   0.00000     -0.301140E-02
    1731 4S   56   LEU  CD2    24  -0.270000       12.0110           0   0.00000     -0.301140E-02
    1732 4S   56   LEU  HD21    3   0.900000E-01   1.00800           0   0.00000     -0.301140E-02
    1733 4S   56   LEU  HD22    3   0.900000E-01   1.00800           0   0.00000     -0.301140E-02
    1734 4S   56   LEU  HD23    3   0.900000E-01   1.00800           0   0.00000     -0.301140E-02
    1735 4S   56   LEU  C      20   0.510000       12.0110           0   0.00000     -0.301140E-02
    1736 4S   56   LEU  O      70  -0.510000       15.9990           0   0.00000     -0.301140E-02
    1737 4S   57   THR  N      54  -0.470000       14.0070           0   0.00000     -0.301140E-02
    1738 4S   57   THR  HN      1   0.310000       1.00800           0   0.00000     -0.301140E-02
    1739 4S   57   THR  CA     22   0.700000E-01   12.0110           0   0.00000     -0.301140E-02
    1740 4S   57   THR  HA      6   0.900000E-01   1.00800           0   0.00000     -0.301140E-02
    1741 4S   57   THR  CB     22   0.140000       12.0110           0   0.00000     -0.301140E-02
    1742 4S   57   THR  HB      3   0.900000E-01   1.00800           0   0.00000     -0.301140E-02
    1743 4S   57   THR  OG1    73  -0.660000       15.9990           0   0.00000     -0.301140E-02
    1744 4S   57   THR  HG1     1   0.430000       1.00800           0   0.00000     -0.301140E-02
    1745 4S   57   THR  CG2    24  -0.270000       12.0110           0   0.00000     -0.301140E-02
    1746 4S   57   THR  HG21    3   0.900000E-01   1.00800           0   0.00000     -0.301140E-02
    1747 4S   57   THR  HG22    3   0.900000E-01   1.00800           0   0.00000     -0.301140E-02
    1748 4S   57   THR  HG23    3   0.900000E-01   1.00800           0   0.00000     -0.301140E-02
    1749 4S   57   THR  C      20   0.510000       12.0110           0   0.00000     -0.301140E-02
    1750 4S   57   THR  O      70  -0.510000       15.9990           0   0.00000     -0.301140E-02
    1751 4S   58   GLN  N      54  -0.470000       14.0070           0   0.00000     -0.301140E-02
    1752 4S   58   GLN  HN      1   0.310000       1.00800           0   0.00000     -0.301140E-02
    1753 4S   58   GLN  CA     22   0.700000E-01   12.0110           0   0.00000     -0.301140E-02
    1754 4S   58   GLN  HA      6   0.900000E-01   1.00800           0   0.00000     -0.301140E-02
    1755 4S   58   GLN  CB     23  -0.180000       12.0110           0   0.00000     -0.301140E-02
    1756 4S   58   GLN  HB1     3   0.900000E-01   1.00800           0   0.00000     -0.301140E-02
    1757 4S   58   GLN  HB2     3   0.900000E-01   1.00800           0   0.00000     -0.301140E-02
    1758 4S   58   GLN  CG     23  -0.180000       12.0110           0   0.00000     -0.301140E-02
    1759 4S   58   GLN  HG1     3   0.900000E-01   1.00800           0   0.00000     -0.301140E-02
    1760 4S   58   GLN  HG2     3   0.900000E-01   1.00800           0   0.00000     -0.301140E-02
    1761 4S   58   GLN  CD     32   0.550000       12.0110           0   0.00000     -0.301140E-02
    1762 4S   58   GLN  OE1    70  -0.550000       15.9990           0   0.00000     -0.301140E-02
    1763 4S   58   GLN  NE2    55  -0.620000       14.0070           0   0.00000     -0.301140E-02
    1764 4S   58   GLN  HE21    1   0.320000       1.00800           0   0.00000     -0.301140E-02
    1765 4S   58   GLN  HE22    1   0.300000       1.00800           0   0.00000     -0.301140E-02
    1766 4S   58   GLN  C      20   0.510000       12.0110           0   0.00000     -0.301140E-02
    1767 4S   58   GLN  O      70  -0.510000       15.9990           0   0.00000     -0.301140E-02
    1768 4S   59   HSD  N      54  -0.470000       14.0070           0   0.00000     -0.301140E-02
    1769 4S   59   HSD  HN      1   0.310000       1.00800           0   0.00000     -0.301140E-02
    1770 4S   59   HSD  CA     22   0.700000E-01   12.0110           0   0.00000     -0.301140E-02
    1771 4S   59   HSD  HA      6   0.900000E-01   1.00800           0   0.00000     -0.301140E-02
    1772 4S   59   HSD  CB     23  -0.900000E-01   12.0110           0   0.00000     -0.301140E-02
    1773 4S   59   HSD  HB1     3   0.900000E-01   1.00800           0   0.00000     -0.301140E-02
    1774 4S   59   HSD  HB2     3   0.900000E-01   1.00800           0   0.00000     -0.301140E-02
    1775 4S   59   HSD  ND1    51  -0.360000       14.0070           0   0.00000     -0.301140E-02
    1776 4S   59   HSD  HD1     1   0.320000       1.00800           0   0.00000     -0.301140E-02
    1777 4S   59   HSD  CG     25  -0.500000E-01   12.0110           0   0.00000     -0.301140E-02
    1778 4S   59   HSD  CE1    26   0.250000       12.0110           0   0.00000     -0.301140E-02
    1779 4S   59   HSD  HE1     7   0.130000       1.00800           0   0.00000     -0.301140E-02
    1780 4S   59   HSD  NE2    52  -0.700000       14.0070           0   0.00000     -0.301140E-02
    1781 4S   59   HSD  CD2    25   0.220000       12.0110           0   0.00000     -0.301140E-02
    1782 4S   59   HSD  HD2     9   0.100000       1.00800           0   0.00000     -0.301140E-02
    1783 4S   59   HSD  C      20   0.510000       12.0110           0   0.00000     -0.301140E-02
    1784 4S   59   HSD  O      70  -0.510000       15.9990           0   0.00000     -0.301140E-02
    1785 4S   60   GLY  N      54  -0.470000       14.0070           0   0.00000     -0.301140E-02
    1786 4S   60   GLY  HN      1   0.310000       1.00800           0   0.00000     -0.301140E-02
    1787 4S   60   GLY  CA     23  -0.200000E-01   12.0110           0   0.00000     -0.301140E-02
    1788 4S   60   GLY  HA1     6   0.900000E-01   1.00800           0   0.00000     -0.301140E-02
    1789 4S   60   GLY  HA2     6   0.900000E-01   1.00800           0   0.00000     -0.301140E-02
    1790 4S   60   GLY  C      20   0.510000       12.0110           0   0.00000     -0.301140E-02
    1791 4S   60   GLY  O      70  -0.510000       15.9990           0   0.00000     -0.301140E-02
    1792 4S   61   LYS  N      54  -0.470000       14.0070           0   0.00000     -0.301140E-02
    1793 4S   61   LYS  HN      1   0.310000       1.00800           0   0.00000     -0.301140E-02
    1794 4S   61   LYS  CA     22   0.700000E-01   12.0110           0   0.00000     -0.301140E-02
    1795 4S   61   LYS  HA      6   0.900000E-01   1.00800           0   0.00000     -0.301140E-02
    1796 4S   61   LYS  CB     23  -0.180000       12.0110           0   0.00000     -0.301140E-02
    1797 4S   61   LYS  HB1     3   0.900000E-01   1.00800           0   0.00000     -0.301140E-02
    1798 4S   61   LYS  HB2     3   0.900000E-01   1.00800           0   0.00000     -0.301140E-02
    1799 4S   61   LYS  CG     23  -0.180000       12.0110           0   0.00000     -0.301140E-02
    1800 4S   61   LYS  HG1     3   0.900000E-01   1.00800           0   0.00000     -0.301140E-02
    1801 4S   61   LYS  HG2     3   0.900000E-01   1.00800           0   0.00000     -0.301140E-02
    1802 4S   61   LYS  CD     23  -0.180000       12.0110           0   0.00000     -0.301140E-02
    1803 4S   61   LYS  HD1     3   0.900000E-01   1.00800           0   0.00000     -0.301140E-02
    1804 4S   61   LYS  HD2     3   0.900000E-01   1.00800           0   0.00000     -0.301140E-02
    1805 4S   61   LYS  CE     23   0.210000       12.0110           0   0.00000     -0.301140E-02
    1806 4S   61   LYS  HE1     3   0.500000E-01   1.00800           0   0.00000     -0.301140E-02
    1807 4S   61   LYS  HE2     3   0.500000E-01   1.00800           0   0.00000     -0.301140E-02
    1808 4S   61   LYS  NZ     56  -0.300000       14.0070           0   0.00000     -0.301140E-02
    1809 4S   61   LYS  HZ1     2   0.330000       1.00800           0   0.00000     -0.301140E-02
    1810 4S   61   LYS  HZ2     2   0.330000       1.00800           0   0.00000     -0.301140E-02
    1811 4S   61   LYS  HZ3     2   0.330000       1.00800           0   0.00000     -0.301140E-02
    1812 4S   61   LYS  C      20   0.510000       12.0110           0   0.00000     -0.301140E-02
    1813 4S   61   LYS  O      70  -0.510000       15.9990           0   0.00000     -0.301140E-02
    1814 4S   62   GLU  N      54  -0.470000       14.0070           0   0.00000     -0.301140E-02
    1815 4S   62   GLU  HN      1   0.310000       1.00800           0   0.00000     -0.301140E-02
    1816 4S   62   GLU  CA     22   0.700000E-01   12.0110           0   0.00000     -0.301140E-02
    1817 4S   62   GLU  HA      6   0.900000E-01   1.00800           0   0.00000     -0.301140E-02
    1818 4S   62   GLU  CB     23  -0.180000       12.0110           0   0.00000     -0.301140E-02
    1819 4S   62   GLU  HB1     3   0.900000E-01   1.00800           0   0.00000     -0.301140E-02
    1820 4S   62   GLU  HB2     3   0.900000E-01   1.00800           0   0.00000     -0.301140E-02
    1821 4S   62   GLU  CG     23  -0.280000       12.0110           0   0.00000     -0.301140E-02
    1822 4S   62   GLU  HG1     3   0.900000E-01   1.00800           0   0.00000     -0.301140E-02
    1823 4S   62   GLU  HG2     3   0.900000E-01   1.00800           0   0.00000     -0.301140E-02
    1824 4S   62   GLU  CD     32   0.620000       12.0110           0   0.00000     -0.301140E-02
    1825 4S   62   GLU  OE1    72  -0.760000       15.9990           0   0.00000     -0.301140E-02
    1826 4S   62   GLU  OE2    72  -0.760000       15.9990           0   0.00000     -0.301140E-02
    1827 4S   62   GLU  C      20   0.510000       12.0110           0   0.00000     -0.301140E-02
    1828 4S   62   GLU  O      70  -0.510000       15.9990           0   0.00000     -0.301140E-02
    1829 4S   63   ASP  N      54  -0.470000       14.0070           0   0.00000     -0.301140E-02
    1830 4S   63   ASP  HN      1   0.310000       1.00800           0   0.00000     -0.301140E-02
    1831 4S   63   ASP  CA     22   0.700000E-01   12.0110           0   0.00000     -0.301140E-02
    1832 4S   63   ASP  HA      6   0.900000E-01   1.00800           0   0.00000     -0.301140E-02
    1833 4S   63   ASP  CB     23  -0.280000       12.0110           0   0.00000     -0.301140E-02
    1834 4S   63   ASP  HB1     3   0.900000E-01   1.00800           0   0.00000     -0.301140E-02
    1835 4S   63   ASP  HB2     3   0.900000E-01   1.00800           0   0.00000     -0.301140E-02
    1836 4S   63   ASP  CG     32   0.620000       12.0110           0   0.00000     -0.301140E-02
    1837 4S   63   ASP  OD1    72  -0.760000       15.9990           0   0.00000     -0.301140E-02
    1838 4S   63   ASP  OD2    72  -0.760000       15.9990           0   0.00000     -0.301140E-02
    1839 4S   63   ASP  C      20   0.510000       12.0110           0   0.00000     -0.301140E-02
    1840 4S   63   ASP  O      70  -0.510000       15.9990           0   0.00000     -0.301140E-02
    1841 4S   64   LEU  N      54  -0.470000       14.0070           0   0.00000     -0.301140E-02
    1842 4S   64   LEU  HN      1   0.310000       1.00800           0   0.00000     -0.301140E-02
    1843 4S   64   LEU  CA     22   0.700000E-01   12.0110           0   0.00000     -0.301140E-02
    1844 4S   64   LEU  HA      6   0.900000E-01   1.00800           0   0.00000     -0.301140E-02
    1845 4S   64   LEU  CB     23  -0.180000       12.0110           0   0.00000     -0.301140E-02
    1846 4S   64   LEU  HB1     3   0.900000E-01   1.00800           0   0.00000     -0.301140E-02
    1847 4S   64   LEU  HB2     3   0.900000E-01   1.00800           0   0.00000     -0.301140E-02
    1848 4S   64   LEU  CG     22  -0.900000E-01   12.0110           0   0.00000     -0.301140E-02
    1849 4S   64   LEU  HG      3   0.900000E-01   1.00800           0   0.00000     -0.301140E-02
    1850 4S   64   LEU  CD1    24  -0.270000       12.0110           0   0.00000     -0.301140E-02
    1851 4S   64   LEU  HD11    3   0.900000E-01   1.00800           0   0.00000     -0.301140E-02
    1852 4S   64   LEU  HD12    3   0.900000E-01   1.00800           0   0.00000     -0.301140E-02
    1853 4S   64   LEU  HD13    3   0.900000E-01   1.00800           0   0.00000     -0.301140E-02
    1854 4S   64   LEU  CD2    24  -0.270000       12.0110           0   0.00000     -0.301140E-02
    1855 4S   64   LEU  HD21    3   0.900000E-01   1.00800           0   0.00000     -0.301140E-02
    1856 4S   64   LEU  HD22    3   0.900000E-01   1.00800           0   0.00000     -0.301140E-02
    1857 4S   64   LEU  HD23    3   0.900000E-01   1.00800           0   0.00000     -0.301140E-02
    1858 4S   64   LEU  C      20   0.510000       12.0110           0   0.00000     -0.301140E-02
    1859 4S   64   LEU  O      70  -0.510000       15.9990           0   0.00000     -0.301140E-02
    1860 4S   65   LYS  N      54  -0.470000       14.0070           0   0.00000     -0.301140E-02
    1861 4S   65   LYS  HN      1   0.310000       1.00800           0   0.00000     -0.301140E-02
    1862 4S   65   LYS  CA     22   0.700000E-01   12.0110           0   0.00000     -0.301140E-02
    1863 4S   65   LYS  HA      6   0.900000E-01   1.00800           0   0.00000     -0.301140E-02
    1864 4S   65   LYS  CB     23  -0.180000       12.0110           0   0.00000     -0.301140E-02
    1865 4S   65   LYS  HB1     3   0.900000E-01   1.00800           0   0.00000     -0.301140E-02
    1866 4S   65   LYS  HB2     3   0.900000E-01   1.00800           0   0.00000     -0.301140E-02
    1867 4S   65   LYS  CG     23  -0.180000       12.0110           0   0.00000     -0.301140E-02
    1868 4S   65   LYS  HG1     3   0.900000E-01   1.00800           0   0.00000     -0.301140E-02
    1869 4S   65   LYS  HG2     3   0.900000E-01   1.00800           0   0.00000     -0.301140E-02
    1870 4S   65   LYS  CD     23  -0.180000       12.0110           0   0.00000     -0.301140E-02
    1871 4S   65   LYS  HD1     3   0.900000E-01   1.00800           0   0.00000     -0.301140E-02
    1872 4S   65   LYS  HD2     3   0.900000E-01   1.00800           0   0.00000     -0.301140E-02
    1873 4S   65   LYS  CE     23   0.210000       12.0110           0   0.00000     -0.301140E-02
    1874 4S   65   LYS  HE1     3   0.500000E-01   1.00800           0   0.00000     -0.301140E-02
    1875 4S   65   LYS  HE2     3   0.500000E-01   1.00800           0   0.00000     -0.301140E-02
    1876 4S   65   LYS  NZ     56  -0.300000       14.0070           0   0.00000     -0.301140E-02
    1877 4S   65   LYS  HZ1     2   0.330000       1.00800           0   0.00000     -0.301140E-02
    1878 4S   65   LYS  HZ2     2   0.330000       1.00800           0   0.00000     -0.301140E-02
    1879 4S   65   LYS  HZ3     2   0.330000       1.00800           0   0.00000     -0.301140E-02
    1880 4S   65   LYS  C      20   0.510000       12.0110           0   0.00000     -0.301140E-02
    1881 4S   65   LYS  O      70  -0.510000       15.9990           0   0.00000     -0.301140E-02
    1882 4S   66   PHE  N      54  -0.470000       14.0070           0   0.00000     -0.301140E-02
    1883 4S   66   PHE  HN      1   0.310000       1.00800           0   0.00000     -0.301140E-02
    1884 4S   66   PHE  CA     22   0.700000E-01   12.0110           0   0.00000     -0.301140E-02
    1885 4S   66   PHE  HA      6   0.900000E-01   1.00800           0   0.00000     -0.301140E-02
    1886 4S   66   PHE  CB     23  -0.180000       12.0110           0   0.00000     -0.301140E-02
    1887 4S   66   PHE  HB1     3   0.900000E-01   1.00800           0   0.00000     -0.301140E-02
    1888 4S   66   PHE  HB2     3   0.900000E-01   1.00800           0   0.00000     -0.301140E-02
    1889 4S   66   PHE  CG     21    0.00000       12.0110           0   0.00000     -0.301140E-02
    1890 4S   66   PHE  CD1    21  -0.115000       12.0110           0   0.00000     -0.301140E-02
    1891 4S   66   PHE  HD1     5   0.115000       1.00800           0   0.00000     -0.301140E-02
    1892 4S   66   PHE  CE1    21  -0.115000       12.0110           0   0.00000     -0.301140E-02
    1893 4S   66   PHE  HE1     5   0.115000       1.00800           0   0.00000     -0.301140E-02
    1894 4S   66   PHE  CZ     21  -0.115000       12.0110           0   0.00000     -0.301140E-02
    1895 4S   66   PHE  HZ      5   0.115000       1.00800           0   0.00000     -0.301140E-02
    1896 4S   66   PHE  CD2    21  -0.115000       12.0110           0   0.00000     -0.301140E-02
    1897 4S   66   PHE  HD2     5   0.115000       1.00800           0   0.00000     -0.301140E-02
    1898 4S   66   PHE  CE2    21  -0.115000       12.0110           0   0.00000     -0.301140E-02
    1899 4S   66   PHE  HE2     5   0.115000       1.00800           0   0.00000     -0.301140E-02
    1900 4S   66   PHE  C      20   0.510000       12.0110           0   0.00000     -0.301140E-02
    1901 4S   66   PHE  O      70  -0.510000       15.9990           0   0.00000     -0.301140E-02
    1902 4S   67   PRO  N      50  -0.290000       14.0070           0   0.00000     -0.301140E-02
    1903 4S   67   PRO  CD     31    0.00000       12.0110           0   0.00000     -0.301140E-02
    1904 4S   67   PRO  HD1     3   0.900000E-01   1.00800           0   0.00000     -0.301140E-02
    1905 4S   67   PRO  HD2     3   0.900000E-01   1.00800           0   0.00000     -0.301140E-02
    1906 4S   67   PRO  CA     29   0.200000E-01   12.0110           0   0.00000     -0.301140E-02
    1907 4S   67   PRO  HA      6   0.900000E-01   1.00800           0   0.00000     -0.301140E-02
    1908 4S   67   PRO  CB     30  -0.180000       12.0110           0   0.00000     -0.301140E-02
    1909 4S   67   PRO  HB1     3   0.900000E-01   1.00800           0   0.00000     -0.301140E-02
    1910 4S   67   PRO  HB2     3   0.900000E-01   1.00800           0   0.00000     -0.301140E-02
    1911 4S   67   PRO  CG     30  -0.180000       12.0110           0   0.00000     -0.301140E-02
    1912 4S   67   PRO  HG1     3   0.900000E-01   1.00800           0   0.00000     -0.301140E-02
    1913 4S   67   PRO  HG2     3   0.900000E-01   1.00800           0   0.00000     -0.301140E-02
    1914 4S   67   PRO  C      20   0.510000       12.0110           0   0.00000     -0.301140E-02
    1915 4S   67   PRO  O      70  -0.510000       15.9990           0   0.00000     -0.301140E-02
    1916 4S   68   ARG  N      54  -0.470000       14.0070           0   0.00000     -0.301140E-02
    1917 4S   68   ARG  HN      1   0.310000       1.00800           0   0.00000     -0.301140E-02
    1918 4S   68   ARG  CA     22   0.700000E-01   12.0110           0   0.00000     -0.301140E-02
    1919 4S   68   ARG  HA      6   0.900000E-01   1.00800           0   0.00000     -0.301140E-02
    1920 4S   68   ARG  CB     23  -0.180000       12.0110           0   0.00000     -0.301140E-02
    1921 4S   68   ARG  HB1     3   0.900000E-01   1.00800           0   0.00000     -0.301140E-02
    1922 4S   68   ARG  HB2     3   0.900000E-01   1.00800           0   0.00000     -0.301140E-02
    1923 4S   68   ARG  CG     23  -0.180000       12.0110           0   0.00000     -0.301140E-02
    1924 4S   68   ARG  HG1     3   0.900000E-01   1.00800           0   0.00000     -0.301140E-02
    1925 4S   68   ARG  HG2     3   0.900000E-01   1.00800           0   0.00000     -0.301140E-02
    1926 4S   68   ARG  CD     23   0.200000       12.0110           0   0.00000     -0.301140E-02
    1927 4S   68   ARG  HD1     3   0.900000E-01   1.00800           0   0.00000     -0.301140E-02
    1928 4S   68   ARG  HD2     3   0.900000E-01   1.00800           0   0.00000     -0.301140E-02
    1929 4S   68   ARG  NE     57  -0.700000       14.0070           0   0.00000     -0.301140E-02
    1930 4S   68   ARG  HE      2   0.440000       1.00800           0   0.00000     -0.301140E-02
    1931 4S   68   ARG  CZ     20   0.640000       12.0110           0   0.00000     -0.301140E-02
    1932 4S   68   ARG  NH1    57  -0.800000       14.0070           0   0.00000     -0.301140E-02
    1933 4S   68   ARG  HH11    2   0.460000       1.00800           0   0.00000     -0.301140E-02
    1934 4S   68   ARG  HH12    2   0.460000       1.00800           0   0.00000     -0.301140E-02
    1935 4S   68   ARG  NH2    57  -0.800000       14.0070           0   0.00000     -0.301140E-02
    1936 4S   68   ARG  HH21    2   0.460000       1.00800           0   0.00000     -0.301140E-02
    1937 4S   68   ARG  HH22    2   0.460000       1.00800           0   0.00000     -0.301140E-02
    1938 4S   68   ARG  C      20   0.510000       12.0110           0   0.00000     -0.301140E-02
    1939 4S   68   ARG  O      70  -0.510000       15.9990           0   0.00000     -0.301140E-02
    1940 4S   69   GLY  N      54  -0.470000       14.0070           0   0.00000     -0.301140E-02
    1941 4S   69   GLY  HN      1   0.310000       1.00800           0   0.00000     -0.301140E-02
    1942 4S   69   GLY  CA     23  -0.200000E-01   12.0110           0   0.00000     -0.301140E-02
    1943 4S   69   GLY  HA1     6   0.900000E-01   1.00800           0   0.00000     -0.301140E-02
    1944 4S   69   GLY  HA2     6   0.900000E-01   1.00800           0   0.00000     -0.301140E-02
    1945 4S   69   GLY  C      20   0.510000       12.0110           0   0.00000     -0.301140E-02
    1946 4S   69   GLY  O      70  -0.510000       15.9990           0   0.00000     -0.301140E-02
    1947 4S   70   GLN  N      54  -0.470000       14.0070           0   0.00000     -0.301140E-02
    1948 4S   70   GLN  HN      1   0.310000       1.00800           0   0.00000     -0.301140E-02
    1949 4S   70   GLN  CA     22   0.700000E-01   12.0110           0   0.00000     -0.301140E-02
    1950 4S   70   GLN  HA      6   0.900000E-01   1.00800           0   0.00000     -0.301140E-02
    1951 4S   70   GLN  CB     23  -0.180000       12.0110           0   0.00000     -0.301140E-02
    1952 4S   70   GLN  HB1     3   0.900000E-01   1.00800           0   0.00000     -0.301140E-02
    1953 4S   70   GLN  HB2     3   0.900000E-01   1.00800           0   0.00000     -0.301140E-02
    1954 4S   70   GLN  CG     23  -0.180000       12.0110           0   0.00000     -0.301140E-02
    1955 4S   70   GLN  HG1     3   0.900000E-01   1.00800           0   0.00000     -0.301140E-02
    1956 4S   70   GLN  HG2     3   0.900000E-01   1.00800           0   0.00000     -0.301140E-02
    1957 4S   70   GLN  CD     32   0.550000       12.0110           0   0.00000     -0.301140E-02
    1958 4S   70   GLN  OE1    70  -0.550000       15.9990           0   0.00000     -0.301140E-02
    1959 4S   70   GLN  NE2    55  -0.620000       14.0070           0   0.00000     -0.301140E-02
    1960 4S   70   GLN  HE21    1   0.320000       1.00800           0   0.00000     -0.301140E-02
    1961 4S   70   GLN  HE22    1   0.300000       1.00800           0   0.00000     -0.301140E-02
    1962 4S   70   GLN  C      20   0.510000       12.0110           0   0.00000     -0.301140E-02
    1963 4S   70   GLN  O      70  -0.510000       15.9990           0   0.00000     -0.301140E-02
    1964 4S   71   GLY  N      54  -0.470000       14.0070           0   0.00000     -0.301140E-02
    1965 4S   71   GLY  HN      1   0.310000       1.00800           0   0.00000     -0.301140E-02
    1966 4S   71   GLY  CA     23  -0.200000E-01   12.0110           0   0.00000     -0.301140E-02
    1967 4S   71   GLY  HA1     6   0.900000E-01   1.00800           0   0.00000     -0.301140E-02
    1968 4S   71   GLY  HA2     6   0.900000E-01   1.00800           0   0.00000     -0.301140E-02
    1969 4S   71   GLY  C      20   0.510000       12.0110           0   0.00000     -0.301140E-02
    1970 4S   71   GLY  O      70  -0.510000       15.9990           0   0.00000     -0.301140E-02
    1971 4S   72   VAL  N      54  -0.470000       14.0070           0   0.00000     -0.301140E-02
    1972 4S   72   VAL  HN      1   0.310000       1.00800           0   0.00000     -0.301140E-02
    1973 4S   72   VAL  CA     22   0.700000E-01   12.0110           0   0.00000     -0.301140E-02
    1974 4S   72   VAL  HA      6   0.900000E-01   1.00800           0   0.00000     -0.301140E-02
    1975 4S   72   VAL  CB     22  -0.900000E-01   12.0110           0   0.00000     -0.301140E-02
    1976 4S   72   VAL  HB      3   0.900000E-01   1.00800           0   0.00000     -0.301140E-02
    1977 4S   72   VAL  CG1    24  -0.270000       12.0110           0   0.00000     -0.301140E-02
    1978 4S   72   VAL  HG11    3   0.900000E-01   1.00800           0   0.00000     -0.301140E-02
    1979 4S   72   VAL  HG12    3   0.900000E-01   1.00800           0   0.00000     -0.301140E-02
    1980 4S   72   VAL  HG13    3   0.900000E-01   1.00800           0   0.00000     -0.301140E-02
    1981 4S   72   VAL  CG2    24  -0.270000       12.0110           0   0.00000     -0.301140E-02
    1982 4S   72   VAL  HG21    3   0.900000E-01   1.00800           0   0.00000     -0.301140E-02
    1983 4S   72   VAL  HG22    3   0.900000E-01   1.00800           0   0.00000     -0.301140E-02
    1984 4S   72   VAL  HG23    3   0.900000E-01   1.00800           0   0.00000     -0.301140E-02
    1985 4S   72   VAL  C      20   0.510000       12.0110           0   0.00000     -0.301140E-02
    1986 4S   72   VAL  O      70  -0.510000       15.9990           0   0.00000     -0.301140E-02
    1987 4S   73   PRO  N      50  -0.290000       14.0070           0   0.00000     -0.301140E-02
    1988 4S   73   PRO  CD     31    0.00000       12.0110           0   0.00000     -0.301140E-02
    1989 4S   73   PRO  HD1     3   0.900000E-01   1.00800           0   0.00000     -0.301140E-02
    1990 4S   73   PRO  HD2     3   0.900000E-01   1.00800           0   0.00000     -0.301140E-02
    1991 4S   73   PRO  CA     29   0.200000E-01   12.0110           0   0.00000     -0.301140E-02
    1992 4S   73   PRO  HA      6   0.900000E-01   1.00800           0   0.00000     -0.301140E-02
    1993 4S   73   PRO  CB     30  -0.180000       12.0110           0   0.00000     -0.301140E-02
    1994 4S   73   PRO  HB1     3   0.900000E-01   1.00800           0   0.00000     -0.301140E-02
    1995 4S   73   PRO  HB2     3   0.900000E-01   1.00800           0   0.00000     -0.301140E-02
    1996 4S   73   PRO  CG     30  -0.180000       12.0110           0   0.00000     -0.301140E-02
    1997 4S   73   PRO  HG1     3   0.900000E-01   1.00800           0   0.00000     -0.301140E-02
    1998 4S   73   PRO  HG2     3   0.900000E-01   1.00800           0   0.00000     -0.301140E-02
    1999 4S   73   PRO  C      20   0.510000       12.0110           0   0.00000     -0.301140E-02
    2000 4S   73   PRO  O      70  -0.510000       15.9990           0   0.00000     -0.301140E-02
    2001 4S   74   ILE  N      54  -0.470000       14.0070           0   0.00000     -0.301140E-02
    2002 4S   74   ILE  HN      1   0.310000       1.00800           0   0.00000     -0.301140E-02
    2003 4S   74   ILE  CA     22   0.700000E-01   12.0110           0   0.00000     -0.301140E-02
    2004 4S   74   ILE  HA      6   0.900000E-01   1.00800           0   0.00000     -0.301140E-02
    2005 4S   74   ILE  CB     22  -0.900000E-01   12.0110           0   0.00000     -0.301140E-02
    2006 4S   74   ILE  HB      3   0.900000E-01   1.00800           0   0.00000     -0.301140E-02
    2007 4S   74   ILE  CG2    24  -0.270000       12.0110           0   0.00000     -0.301140E-02
    2008 4S   74   ILE  HG21    3   0.900000E-01   1.00800           0   0.00000     -0.301140E-02
    2009 4S   74   ILE  HG22    3   0.900000E-01   1.00800           0   0.00000     -0.301140E-02
    2010 4S   74   ILE  HG23    3   0.900000E-01   1.00800           0   0.00000     -0.301140E-02
    2011 4S   74   ILE  CG1    23  -0.180000       12.0110           0   0.00000     -0.301140E-02
    2012 4S   74   ILE  HG11    3   0.900000E-01   1.00800           0   0.00000     -0.301140E-02
    2013 4S   74   ILE  HG12    3   0.900000E-01   1.00800           0   0.00000     -0.301140E-02
    2014 4S   74   ILE  CD     24  -0.270000       12.0110           0   0.00000     -0.301140E-02
    2015 4S   74   ILE  HD1     3   0.900000E-01   1.00800           0   0.00000     -0.301140E-02
    2016 4S   74   ILE  HD2     3   0.900000E-01   1.00800           0   0.00000     -0.301140E-02
    2017 4S   74   ILE  HD3     3   0.900000E-01   1.00800           0   0.00000     -0.301140E-02
    2018 4S   74   ILE  C      20   0.510000       12.0110           0   0.00000     -0.301140E-02
    2019 4S   74   ILE  O      70  -0.510000       15.9990           0   0.00000     -0.301140E-02
    2020 4S   75   ASN  N      54  -0.470000       14.0070           0   0.00000     -0.301140E-02
    2021 4S   75   ASN  HN      1   0.310000       1.00800           0   0.00000     -0.301140E-02
    2022 4S   75   ASN  CA     22   0.700000E-01   12.0110           0   0.00000     -0.301140E-02
    2023 4S   75   ASN  HA      6   0.900000E-01   1.00800           0   0.00000     -0.301140E-02
    2024 4S   75   ASN  CB     23  -0.180000       12.0110           0   0.00000     -0.301140E-02
    2025 4S   75   ASN  HB1     3   0.900000E-01   1.00800           0   0.00000     -0.301140E-02
    2026 4S   75   ASN  HB2     3   0.900000E-01   1.00800           0   0.00000     -0.301140E-02
    2027 4S   75   ASN  CG     32   0.550000       12.0110           0   0.00000     -0.301140E-02
    2028 4S   75   ASN  OD1    70  -0.550000       15.9990           0   0.00000     -0.301140E-02
    2029 4S   75   ASN  ND2    55  -0.620000       14.0070           0   0.00000     -0.301140E-02
    2030 4S   75   ASN  HD21    1   0.320000       1.00800           0   0.00000     -0.301140E-02
    2031 4S   75   ASN  HD22    1   0.300000       1.00800           0   0.00000     -0.301140E-02
    2032 4S   75   ASN  C      20   0.510000       12.0110           0   0.00000     -0.301140E-02
    2033 4S   75   ASN  O      70  -0.510000       15.9990           0   0.00000     -0.301140E-02
    2034 4S   76   THR  N      54  -0.470000       14.0070           0   0.00000     -0.301140E-02
    2035 4S   76   THR  HN      1   0.310000       1.00800           0   0.00000     -0.301140E-02
    2036 4S   76   THR  CA     22   0.700000E-01   12.0110           0   0.00000     -0.301140E-02
    2037 4S   76   THR  HA      6   0.900000E-01   1.00800           0   0.00000     -0.301140E-02
    2038 4S   76   THR  CB     22   0.140000       12.0110           0   0.00000     -0.301140E-02
    2039 4S   76   THR  HB      3   0.900000E-01   1.00800           0   0.00000     -0.301140E-02
    2040 4S   76   THR  OG1    73  -0.660000       15.9990           0   0.00000     -0.301140E-02
    2041 4S   76   THR  HG1     1   0.430000       1.00800           0   0.00000     -0.301140E-02
    2042 4S   76   THR  CG2    24  -0.270000       12.0110           0   0.00000     -0.301140E-02
    2043 4S   76   THR  HG21    3   0.900000E-01   1.00800           0   0.00000     -0.301140E-02
    2044 4S   76   THR  HG22    3   0.900000E-01   1.00800           0   0.00000     -0.301140E-02
    2045 4S   76   THR  HG23    3   0.900000E-01   1.00800           0   0.00000     -0.301140E-02
    2046 4S   76   THR  C      20   0.510000       12.0110           0   0.00000     -0.301140E-02
    2047 4S   76   THR  O      70  -0.510000       15.9990           0   0.00000     -0.301140E-02
    2048 4S   77   ASN  N      54  -0.470000       14.0070           0   0.00000     -0.301140E-02
    2049 4S   77   ASN  HN      1   0.310000       1.00800           0   0.00000     -0.301140E-02
    2050 4S   77   ASN  CA     22   0.700000E-01   12.0110           0   0.00000     -0.301140E-02
    2051 4S   77   ASN  HA      6   0.900000E-01   1.00800           0   0.00000     -0.301140E-02
    2052 4S   77   ASN  CB     23  -0.180000       12.0110           0   0.00000     -0.301140E-02
    2053 4S   77   ASN  HB1     3   0.900000E-01   1.00800           0   0.00000     -0.301140E-02
    2054 4S   77   ASN  HB2     3   0.900000E-01   1.00800           0   0.00000     -0.301140E-02
    2055 4S   77   ASN  CG     32   0.550000       12.0110           0   0.00000     -0.301140E-02
    2056 4S   77   ASN  OD1    70  -0.550000       15.9990           0   0.00000     -0.301140E-02
    2057 4S   77   ASN  ND2    55  -0.620000       14.0070           0   0.00000     -0.301140E-02
    2058 4S   77   ASN  HD21    1   0.320000       1.00800           0   0.00000     -0.301140E-02
    2059 4S   77   ASN  HD22    1   0.300000       1.00800           0   0.00000     -0.301140E-02
    2060 4S   77   ASN  C      20   0.510000       12.0110           0   0.00000     -0.301140E-02
    2061 4S   77   ASN  O      70  -0.510000       15.9990           0   0.00000     -0.301140E-02
    2062 4S   78   SER  N      54  -0.470000       14.0070           0   0.00000     -0.301140E-02
    2063 4S   78   SER  HN      1   0.310000       1.00800           0   0.00000     -0.301140E-02
    2064 4S   78   SER  CA     22   0.700000E-01   12.0110           0   0.00000     -0.301140E-02
    2065 4S   78   SER  HA      6   0.900000E-01   1.00800           0   0.00000     -0.301140E-02
    2066 4S   78   SER  CB     23   0.500000E-01   12.0110           0   0.00000     -0.301140E-02
    2067 4S   78   SER  HB1     3   0.900000E-01   1.00800           0   0.00000     -0.301140E-02
    2068 4S   78   SER  HB2     3   0.900000E-01   1.00800           0   0.00000     -0.301140E-02
    2069 4S   78   SER  OG     73  -0.660000       15.9990           0   0.00000     -0.301140E-02
    2070 4S   78   SER  HG1     1   0.430000       1.00800           0   0.00000     -0.301140E-02
    2071 4S   78   SER  C      20   0.510000       12.0110           0   0.00000     -0.301140E-02
    2072 4S   78   SER  O      70  -0.510000       15.9990           0   0.00000     -0.301140E-02
    2073 4S   79   SER  N      54  -0.470000       14.0070           0   0.00000     -0.301140E-02
    2074 4S   79   SER  HN      1   0.310000       1.00800           0   0.00000     -0.301140E-02
    2075 4S   79   SER  CA     22   0.700000E-01   12.0110           0   0.00000     -0.301140E-02
    2076 4S   79   SER  HA      6   0.900000E-01   1.00800           0   0.00000     -0.301140E-02
    2077 4S   79   SER  CB     23   0.500000E-01   12.0110           0   0.00000     -0.301140E-02
    2078 4S   79   SER  HB1     3   0.900000E-01   1.00800           0   0.00000     -0.301140E-02
    2079 4S   79   SER  HB2     3   0.900000E-01   1.00800           0   0.00000     -0.301140E-02
    2080 4S   79   SER  OG     73  -0.660000       15.9990           0   0.00000     -0.301140E-02
    2081 4S   79   SER  HG1     1   0.430000       1.00800           0   0.00000     -0.301140E-02
    2082 4S   79   SER  C      20   0.510000       12.0110           0   0.00000     -0.301140E-02
    2083 4S   79   SER  O      70  -0.510000       15.9990           0   0.00000     -0.301140E-02
    2084 4S   80   PRO  N      50  -0.290000       14.0070           0   0.00000     -0.301140E-02
    2085 4S   80   PRO  CD     31    0.00000       12.0110           0   0.00000     -0.301140E-02
    2086 4S   80   PRO  HD1     3   0.900000E-01   1.00800           0   0.00000     -0.301140E-02
    2087 4S   80   PRO  HD2     3   0.900000E-01   1.00800           0   0.00000     -0.301140E-02
    2088 4S   80   PRO  CA     29   0.200000E-01   12.0110           0   0.00000     -0.301140E-02
    2089 4S   80   PRO  HA      6   0.900000E-01   1.00800           0   0.00000     -0.301140E-02
    2090 4S   80   PRO  CB     30  -0.180000       12.0110           0   0.00000     -0.301140E-02
    2091 4S   80   PRO  HB1     3   0.900000E-01   1.00800           0   0.00000     -0.301140E-02
    2092 4S   80   PRO  HB2     3   0.900000E-01   1.00800           0   0.00000     -0.301140E-02
    2093 4S   80   PRO  CG     30  -0.180000       12.0110           0   0.00000     -0.301140E-02
    2094 4S   80   PRO  HG1     3   0.900000E-01   1.00800           0   0.00000     -0.301140E-02
    2095 4S   80   PRO  HG2     3   0.900000E-01   1.00800           0   0.00000     -0.301140E-02
    2096 4S   80   PRO  C      20   0.510000       12.0110           0   0.00000     -0.301140E-02
    2097 4S   80   PRO  O      70  -0.510000       15.9990           0   0.00000     -0.301140E-02
    2098 4S   81   ASP  N      54  -0.470000       14.0070           0   0.00000     -0.301140E-02
    2099 4S   81   ASP  HN      1   0.310000       1.00800           0   0.00000     -0.301140E-02
    2100 4S   81   ASP  CA     22   0.700000E-01   12.0110           0   0.00000     -0.301140E-02
    2101 4S   81   ASP  HA      6   0.900000E-01   1.00800           0   0.00000     -0.301140E-02
    2102 4S   81   ASP  CB     23  -0.280000       12.0110           0   0.00000     -0.301140E-02
    2103 4S   81   ASP  HB1     3   0.900000E-01   1.00800           0   0.00000     -0.301140E-02
    2104 4S   81   ASP  HB2     3   0.900000E-01   1.00800           0   0.00000     -0.301140E-02
    2105 4S   81   ASP  CG     32   0.620000       12.0110           0   0.00000     -0.301140E-02
    2106 4S   81   ASP  OD1    72  -0.760000       15.9990           0   0.00000     -0.301140E-02
    2107 4S   81   ASP  OD2    72  -0.760000       15.9990           0   0.00000     -0.301140E-02
    2108 4S   81   ASP  C      20   0.510000       12.0110           0   0.00000     -0.301140E-02
    2109 4S   81   ASP  O      70  -0.510000       15.9990           0   0.00000     -0.301140E-02
    2110 4S   82   ASP  N      54  -0.470000       14.0070           0   0.00000     -0.301140E-02
    2111 4S   82   ASP  HN      1   0.310000       1.00800           0   0.00000     -0.301140E-02
    2112 4S   82   ASP  CA     22   0.700000E-01   12.0110           0   0.00000     -0.301140E-02
    2113 4S   82   ASP  HA      6   0.900000E-01   1.00800           0   0.00000     -0.301140E-02
    2114 4S   82   ASP  CB     23  -0.280000       12.0110           0   0.00000     -0.301140E-02
    2115 4S   82   ASP  HB1     3   0.900000E-01   1.00800           0   0.00000     -0.301140E-02
    2116 4S   82   ASP  HB2     3   0.900000E-01   1.00800           0   0.00000     -0.301140E-02
    2117 4S   82   ASP  CG     32   0.620000       12.0110           0   0.00000     -0.301140E-02
    2118 4S   82   ASP  OD1    72  -0.760000       15.9990           0   0.00000     -0.301140E-02
    2119 4S   82   ASP  OD2    72  -0.760000       15.9990           0   0.00000     -0.301140E-02
    2120 4S   82   ASP  C      20   0.510000       12.0110           0   0.00000     -0.301140E-02
    2121 4S   82   ASP  O      70  -0.510000       15.9990           0   0.00000     -0.301140E-02
    2122 4S   83   GLN  N      54  -0.470000       14.0070           0   0.00000     -0.301140E-02
    2123 4S   83   GLN  HN      1   0.310000       1.00800           0   0.00000     -0.301140E-02
    2124 4S   83   GLN  CA     22   0.700000E-01   12.0110           0   0.00000     -0.301140E-02
    2125 4S   83   GLN  HA      6   0.900000E-01   1.00800           0   0.00000     -0.301140E-02
    2126 4S   83   GLN  CB     23  -0.180000       12.0110           0   0.00000     -0.301140E-02
    2127 4S   83   GLN  HB1     3   0.900000E-01   1.00800           0   0.00000     -0.301140E-02
    2128 4S   83   GLN  HB2     3   0.900000E-01   1.00800           0   0.00000     -0.301140E-02
    2129 4S   83   GLN  CG     23  -0.180000       12.0110           0   0.00000     -0.301140E-02
    2130 4S   83   GLN  HG1     3   0.900000E-01   1.00800           0   0.00000     -0.301140E-02
    2131 4S   83   GLN  HG2     3   0.900000E-01   1.00800           0   0.00000     -0.301140E-02
    2132 4S   83   GLN  CD     32   0.550000       12.0110           0   0.00000     -0.301140E-02
    2133 4S   83   GLN  OE1    70  -0.550000       15.9990           0   0.00000     -0.301140E-02
    2134 4S   83   GLN  NE2    55  -0.620000       14.0070           0   0.00000     -0.301140E-02
    2135 4S   83   GLN  HE21    1   0.320000       1.00800           0   0.00000     -0.301140E-02
    2136 4S   83   GLN  HE22    1   0.300000       1.00800           0   0.00000     -0.301140E-02
    2137 4S   83   GLN  C      20   0.510000       12.0110           0   0.00000     -0.301140E-02
    2138 4S   83   GLN  O      70  -0.510000       15.9990           0   0.00000     -0.301140E-02
    2139 4S   84   ILE  N      54  -0.470000       14.0070           0   0.00000     -0.301140E-02
    2140 4S   84   ILE  HN      1   0.310000       1.00800           0   0.00000     -0.301140E-02
    2141 4S   84   ILE  CA     22   0.700000E-01   12.0110           0   0.00000     -0.301140E-02
    2142 4S   84   ILE  HA      6   0.900000E-01   1.00800           0   0.00000     -0.301140E-02
    2143 4S   84   ILE  CB     22  -0.900000E-01   12.0110           0   0.00000     -0.301140E-02
    2144 4S   84   ILE  HB      3   0.900000E-01   1.00800           0   0.00000     -0.301140E-02
    2145 4S   84   ILE  CG2    24  -0.270000       12.0110           0   0.00000     -0.301140E-02
    2146 4S   84   ILE  HG21    3   0.900000E-01   1.00800           0   0.00000     -0.301140E-02
    2147 4S   84   ILE  HG22    3   0.900000E-01   1.00800           0   0.00000     -0.301140E-02
    2148 4S   84   ILE  HG23    3   0.900000E-01   1.00800           0   0.00000     -0.301140E-02
    2149 4S   84   ILE  CG1    23  -0.180000       12.0110           0   0.00000     -0.301140E-02
    2150 4S   84   ILE  HG11    3   0.900000E-01   1.00800           0   0.00000     -0.301140E-02
    2151 4S   84   ILE  HG12    3   0.900000E-01   1.00800           0   0.00000     -0.301140E-02
    2152 4S   84   ILE  CD     24  -0.270000       12.0110           0   0.00000     -0.301140E-02
    2153 4S   84   ILE  HD1     3   0.900000E-01   1.00800           0   0.00000     -0.301140E-02
    2154 4S   84   ILE  HD2     3   0.900000E-01   1.00800           0   0.00000     -0.301140E-02
    2155 4S   84   ILE  HD3     3   0.900000E-01   1.00800           0   0.00000     -0.301140E-02
    2156 4S   84   ILE  C      20   0.510000       12.0110           0   0.00000     -0.301140E-02
    2157 4S   84   ILE  O      70  -0.510000       15.9990           0   0.00000     -0.301140E-02
    2158 4S   85   GLY  N      54  -0.470000       14.0070           0   0.00000     -0.301140E-02
    2159 4S   85   GLY  HN      1   0.310000       1.00800           0   0.00000     -0.301140E-02
    2160 4S   85   GLY  CA     23  -0.200000E-01   12.0110           0   0.00000     -0.301140E-02
    2161 4S   85   GLY  HA1     6   0.900000E-01   1.00800           0   0.00000     -0.301140E-02
    2162 4S   85   GLY  HA2     6   0.900000E-01   1.00800           0   0.00000     -0.301140E-02
    2163 4S   85   GLY  C      20   0.510000       12.0110           0   0.00000     -0.301140E-02
    2164 4S   85   GLY  O      70  -0.510000       15.9990           0   0.00000     -0.301140E-02
    2165 4S   86   TYR  N      54  -0.470000       14.0070           0   0.00000     -0.301140E-02
    2166 4S   86   TYR  HN      1   0.310000       1.00800           0   0.00000     -0.301140E-02
    2167 4S   86   TYR  CA     22   0.700000E-01   12.0110           0   0.00000     -0.301140E-02
    2168 4S   86   TYR  HA      6   0.900000E-01   1.00800           0   0.00000     -0.301140E-02
    2169 4S   86   TYR  CB     23  -0.180000       12.0110           0   0.00000     -0.301140E-02
    2170 4S   86   TYR  HB1     3   0.900000E-01   1.00800           0   0.00000     -0.301140E-02
    2171 4S   86   TYR  HB2     3   0.900000E-01   1.00800           0   0.00000     -0.301140E-02
    2172 4S   86   TYR  CG     21    0.00000       12.0110           0   0.00000     -0.301140E-02
    2173 4S   86   TYR  CD1    21  -0.115000       12.0110           0   0.00000     -0.301140E-02
    2174 4S   86   TYR  HD1     5   0.115000       1.00800           0   0.00000     -0.301140E-02
    2175 4S   86   TYR  CE1    21  -0.115000       12.0110           0   0.00000     -0.301140E-02
    2176 4S   86   TYR  HE1     5   0.115000       1.00800           0   0.00000     -0.301140E-02
    2177 4S   86   TYR  CZ     21   0.110000       12.0110           0   0.00000     -0.301140E-02
    2178 4S   86   TYR  OH     73  -0.540000       15.9990           0   0.00000     -0.301140E-02
    2179 4S   86   TYR  HH      1   0.430000       1.00800           0   0.00000     -0.301140E-02
    2180 4S   86   TYR  CD2    21  -0.115000       12.0110           0   0.00000     -0.301140E-02
    2181 4S   86   TYR  HD2     5   0.115000       1.00800           0   0.00000     -0.301140E-02
    2182 4S   86   TYR  CE2    21  -0.115000       12.0110           0   0.00000     -0.301140E-02
    2183 4S   86   TYR  HE2     5   0.115000       1.00800           0   0.00000     -0.301140E-02
    2184 4S   86   TYR  C      20   0.510000       12.0110           0   0.00000     -0.301140E-02
    2185 4S   86   TYR  O      70  -0.510000       15.9990           0   0.00000     -0.301140E-02
    2186 4S   87   TYR  N      54  -0.470000       14.0070           0   0.00000     -0.301140E-02
    2187 4S   87   TYR  HN      1   0.310000       1.00800           0   0.00000     -0.301140E-02
    2188 4S   87   TYR  CA     22   0.700000E-01   12.0110           0   0.00000     -0.301140E-02
    2189 4S   87   TYR  HA      6   0.900000E-01   1.00800           0   0.00000     -0.301140E-02
    2190 4S   87   TYR  CB     23  -0.180000       12.0110           0   0.00000     -0.301140E-02
    2191 4S   87   TYR  HB1     3   0.900000E-01   1.00800           0   0.00000     -0.301140E-02
    2192 4S   87   TYR  HB2     3   0.900000E-01   1.00800           0   0.00000     -0.301140E-02
    2193 4S   87   TYR  CG     21    0.00000       12.0110           0   0.00000     -0.301140E-02
    2194 4S   87   TYR  CD1    21  -0.115000       12.0110           0   0.00000     -0.301140E-02
    2195 4S   87   TYR  HD1     5   0.115000       1.00800           0   0.00000     -0.301140E-02
    2196 4S   87   TYR  CE1    21  -0.115000       12.0110           0   0.00000     -0.301140E-02
    2197 4S   87   TYR  HE1     5   0.115000       1.00800           0   0.00000     -0.301140E-02
    2198 4S   87   TYR  CZ     21   0.110000       12.0110           0   0.00000     -0.301140E-02
    2199 4S   87   TYR  OH     73  -0.540000       15.9990           0   0.00000     -0.301140E-02
    2200 4S   87   TYR  HH      1   0.430000       1.00800           0   0.00000     -0.301140E-02
    2201 4S   87   TYR  CD2    21  -0.115000       12.0110           0   0.00000     -0.301140E-02
    2202 4S   87   TYR  HD2     5   0.115000       1.00800           0   0.00000     -0.301140E-02
    2203 4S   87   TYR  CE2    21  -0.115000       12.0110           0   0.00000     -0.301140E-02
    2204 4S   87   TYR  HE2     5   0.115000       1.00800           0   0.00000     -0.301140E-02
    2205 4S   87   TYR  C      20   0.510000       12.0110           0   0.00000     -0.301140E-02
    2206 4S   87   TYR  O      70  -0.510000       15.9990           0   0.00000     -0.301140E-02
    2207 4S   88   ARG  N      54  -0.470000       14.0070           0   0.00000     -0.301140E-02
    2208 4S   88   ARG  HN      1   0.310000       1.00800           0   0.00000     -0.301140E-02
    2209 4S   88   ARG  CA     22   0.700000E-01   12.0110           0   0.00000     -0.301140E-02
    2210 4S   88   ARG  HA      6   0.900000E-01   1.00800           0   0.00000     -0.301140E-02
    2211 4S   88   ARG  CB     23  -0.180000       12.0110           0   0.00000     -0.301140E-02
    2212 4S   88   ARG  HB1     3   0.900000E-01   1.00800           0   0.00000     -0.301140E-02
    2213 4S   88   ARG  HB2     3   0.900000E-01   1.00800           0   0.00000     -0.301140E-02
    2214 4S   88   ARG  CG     23  -0.180000       12.0110           0   0.00000     -0.301140E-02
    2215 4S   88   ARG  HG1     3   0.900000E-01   1.00800           0   0.00000     -0.301140E-02
    2216 4S   88   ARG  HG2     3   0.900000E-01   1.00800           0   0.00000     -0.301140E-02
    2217 4S   88   ARG  CD     23   0.200000       12.0110           0   0.00000     -0.301140E-02
    2218 4S   88   ARG  HD1     3   0.900000E-01   1.00800           0   0.00000     -0.301140E-02
    2219 4S   88   ARG  HD2     3   0.900000E-01   1.00800           0   0.00000     -0.301140E-02
    2220 4S   88   ARG  NE     57  -0.700000       14.0070           0   0.00000     -0.301140E-02
    2221 4S   88   ARG  HE      2   0.440000       1.00800           0   0.00000     -0.301140E-02
    2222 4S   88   ARG  CZ     20   0.640000       12.0110           0   0.00000     -0.301140E-02
    2223 4S   88   ARG  NH1    57  -0.800000       14.0070           0   0.00000     -0.301140E-02
    2224 4S   88   ARG  HH11    2   0.460000       1.00800           0   0.00000     -0.301140E-02
    2225 4S   88   ARG  HH12    2   0.460000       1.00800           0   0.00000     -0.301140E-02
    2226 4S   88   ARG  NH2    57  -0.800000       14.0070           0   0.00000     -0.301140E-02
    2227 4S   88   ARG  HH21    2   0.460000       1.00800           0   0.00000     -0.301140E-02
    2228 4S   88   ARG  HH22    2   0.460000       1.00800           0   0.00000     -0.301140E-02
    2229 4S   88   ARG  C      20   0.510000       12.0110           0   0.00000     -0.301140E-02
    2230 4S   88   ARG  O      70  -0.510000       15.9990           0   0.00000     -0.301140E-02
    2231 4S   89   ARG  N      54  -0.470000       14.0070           0   0.00000     -0.301140E-02
    2232 4S   89   ARG  HN      1   0.310000       1.00800           0   0.00000     -0.301140E-02
    2233 4S   89   ARG  CA     22   0.700000E-01   12.0110           0   0.00000     -0.301140E-02
    2234 4S   89   ARG  HA      6   0.900000E-01   1.00800           0   0.00000     -0.301140E-02
    2235 4S   89   ARG  CB     23  -0.180000       12.0110           0   0.00000     -0.301140E-02
    2236 4S   89   ARG  HB1     3   0.900000E-01   1.00800           0   0.00000     -0.301140E-02
    2237 4S   89   ARG  HB2     3   0.900000E-01   1.00800           0   0.00000     -0.301140E-02
    2238 4S   89   ARG  CG     23  -0.180000       12.0110           0   0.00000     -0.301140E-02
    2239 4S   89   ARG  HG1     3   0.900000E-01   1.00800           0   0.00000     -0.301140E-02
    2240 4S   89   ARG  HG2     3   0.900000E-01   1.00800           0   0.00000     -0.301140E-02
    2241 4S   89   ARG  CD     23   0.200000       12.0110           0   0.00000     -0.301140E-02
    2242 4S   89   ARG  HD1     3   0.900000E-01   1.00800           0   0.00000     -0.301140E-02
    2243 4S   89   ARG  HD2     3   0.900000E-01   1.00800           0   0.00000     -0.301140E-02
    2244 4S   89   ARG  NE     57  -0.700000       14.0070           0   0.00000     -0.301140E-02
    2245 4S   89   ARG  HE      2   0.440000       1.00800           0   0.00000     -0.301140E-02
    2246 4S   89   ARG  CZ     20   0.640000       12.0110           0   0.00000     -0.301140E-02
    2247 4S   89   ARG  NH1    57  -0.800000       14.0070           0   0.00000     -0.301140E-02
    2248 4S   89   ARG  HH11    2   0.460000       1.00800           0   0.00000     -0.301140E-02
    2249 4S   89   ARG  HH12    2   0.460000       1.00800           0   0.00000     -0.301140E-02
    2250 4S   89   ARG  NH2    57  -0.800000       14.0070           0   0.00000     -0.301140E-02
    2251 4S   89   ARG  HH21    2   0.460000       1.00800           0   0.00000     -0.301140E-02
    2252 4S   89   ARG  HH22    2   0.460000       1.00800           0   0.00000     -0.301140E-02
    2253 4S   89   ARG  C      20   0.510000       12.0110           0   0.00000     -0.301140E-02
    2254 4S   89   ARG  O      70  -0.510000       15.9990           0   0.00000     -0.301140E-02
    2255 4S   90   ALA  N      54  -0.470000       14.0070           0   0.00000     -0.301140E-02
    2256 4S   90   ALA  HN      1   0.310000       1.00800           0   0.00000     -0.301140E-02
    2257 4S   90   ALA  CA     22   0.700000E-01   12.0110           0   0.00000     -0.301140E-02
    2258 4S   90   ALA  HA      6   0.900000E-01   1.00800           0   0.00000     -0.301140E-02
    2259 4S   90   ALA  CB     24  -0.270000       12.0110           0   0.00000     -0.301140E-02
    2260 4S   90   ALA  HB1     3   0.900000E-01   1.00800           0   0.00000     -0.301140E-02
    2261 4S   90   ALA  HB2     3   0.900000E-01   1.00800           0   0.00000     -0.301140E-02
    2262 4S   90   ALA  HB3     3   0.900000E-01   1.00800           0   0.00000     -0.301140E-02
    2263 4S   90   ALA  C      20   0.510000       12.0110           0   0.00000     -0.301140E-02
    2264 4S   90   ALA  O      70  -0.510000       15.9990           0   0.00000     -0.301140E-02
    2265 4S   91   THR  N      54  -0.470000       14.0070           0   0.00000     -0.301140E-02
    2266 4S   91   THR  HN      1   0.310000       1.00800           0   0.00000     -0.301140E-02
    2267 4S   91   THR  CA     22   0.700000E-01   12.0110           0   0.00000     -0.301140E-02
    2268 4S   91   THR  HA      6   0.900000E-01   1.00800           0   0.00000     -0.301140E-02
    2269 4S   91   THR  CB     22   0.140000       12.0110           0   0.00000     -0.301140E-02
    2270 4S   91   THR  HB      3   0.900000E-01   1.00800           0   0.00000     -0.301140E-02
    2271 4S   91   THR  OG1    73  -0.660000       15.9990           0   0.00000     -0.301140E-02
    2272 4S   91   THR  HG1     1   0.430000       1.00800           0   0.00000     -0.301140E-02
    2273 4S   91   THR  CG2    24  -0.270000       12.0110           0   0.00000     -0.301140E-02
    2274 4S   91   THR  HG21    3   0.900000E-01   1.00800           0   0.00000     -0.301140E-02
    2275 4S   91   THR  HG22    3   0.900000E-01   1.00800           0   0.00000     -0.301140E-02
    2276 4S   91   THR  HG23    3   0.900000E-01   1.00800           0   0.00000     -0.301140E-02
    2277 4S   91   THR  C      20   0.510000       12.0110           0   0.00000     -0.301140E-02
    2278 4S   91   THR  O      70  -0.510000       15.9990           0   0.00000     -0.301140E-02
    2279 4S   92   ARG  N      54  -0.470000       14.0070           0   0.00000     -0.301140E-02
    2280 4S   92   ARG  HN      1   0.310000       1.00800           0   0.00000     -0.301140E-02
    2281 4S   92   ARG  CA     22   0.700000E-01   12.0110           0   0.00000     -0.301140E-02
    2282 4S   92   ARG  HA      6   0.900000E-01   1.00800           0   0.00000     -0.301140E-02
    2283 4S   92   ARG  CB     23  -0.180000       12.0110           0   0.00000     -0.301140E-02
    2284 4S   92   ARG  HB1     3   0.900000E-01   1.00800           0   0.00000     -0.301140E-02
    2285 4S   92   ARG  HB2     3   0.900000E-01   1.00800           0   0.00000     -0.301140E-02
    2286 4S   92   ARG  CG     23  -0.180000       12.0110           0   0.00000     -0.301140E-02
    2287 4S   92   ARG  HG1     3   0.900000E-01   1.00800           0   0.00000     -0.301140E-02
    2288 4S   92   ARG  HG2     3   0.900000E-01   1.00800           0   0.00000     -0.301140E-02
    2289 4S   92   ARG  CD     23   0.200000       12.0110           0   0.00000     -0.301140E-02
    2290 4S   92   ARG  HD1     3   0.900000E-01   1.00800           0   0.00000     -0.301140E-02
    2291 4S   92   ARG  HD2     3   0.900000E-01   1.00800           0   0.00000     -0.301140E-02
    2292 4S   92   ARG  NE     57  -0.700000       14.0070           0   0.00000     -0.301140E-02
    2293 4S   92   ARG  HE      2   0.440000       1.00800           0   0.00000     -0.301140E-02
    2294 4S   92   ARG  CZ     20   0.640000       12.0110           0   0.00000     -0.301140E-02
    2295 4S   92   ARG  NH1    57  -0.800000       14.0070           0   0.00000     -0.301140E-02
    2296 4S   92   ARG  HH11    2   0.460000       1.00800           0   0.00000     -0.301140E-02
    2297 4S   92   ARG  HH12    2   0.460000       1.00800           0   0.00000     -0.301140E-02
    2298 4S   92   ARG  NH2    57  -0.800000       14.0070           0   0.00000     -0.301140E-02
    2299 4S   92   ARG  HH21    2   0.460000       1.00800           0   0.00000     -0.301140E-02
    2300 4S   92   ARG  HH22    2   0.460000       1.00800           0   0.00000     -0.301140E-02
    2301 4S   92   ARG  C      32   0.340000       12.0110           0   0.00000     -0.301140E-02
    2302 4S   92   ARG  OT1    72  -0.670000       15.9990           0   0.00000       0.00000    
    2303 4S   92   ARG  OT2    72  -0.670000       15.9990           0   0.00000     -0.301140E-02
    2304 5S   102  LYS  N      56  -0.300000       14.0070           0   0.00000     -0.301140E-02
    2305 5S   102  LYS  HT1     2   0.330000       1.00800           0   0.00000     -0.301140E-02
    2306 5S   102  LYS  HT2     2   0.330000       1.00800           0   0.00000     -0.301140E-02
    2307 5S   102  LYS  HT3     2   0.330000       1.00800           0   0.00000     -0.301140E-02
    2308 5S   102  LYS  CA     22   0.210000       12.0110           0   0.00000     -0.301140E-02
    2309 5S   102  LYS  HA      6   0.100000       1.00800           0   0.00000     -0.301140E-02
    2310 5S   102  LYS  CB     23  -0.180000       12.0110           0   0.00000     -0.301140E-02
    2311 5S   102  LYS  HB1     3   0.900000E-01   1.00800           0   0.00000     -0.301140E-02
    2312 5S   102  LYS  HB2     3   0.900000E-01   1.00800           0   0.00000     -0.301140E-02
    2313 5S   102  LYS  CG     23  -0.180000       12.0110           0   0.00000     -0.301140E-02
    2314 5S   102  LYS  HG1     3   0.900000E-01   1.00800           0   0.00000     -0.301140E-02
    2315 5S   102  LYS  HG2     3   0.900000E-01   1.00800           0   0.00000     -0.301140E-02
    2316 5S   102  LYS  CD     23  -0.180000       12.0110           0   0.00000     -0.301140E-02
    2317 5S   102  LYS  HD1     3   0.900000E-01   1.00800           0   0.00000     -0.301140E-02
    2318 5S   102  LYS  HD2     3   0.900000E-01   1.00800           0   0.00000     -0.301140E-02
    2319 5S   102  LYS  CE     23   0.210000       12.0110           0   0.00000     -0.301140E-02
    2320 5S   102  LYS  HE1     3   0.500000E-01   1.00800           0   0.00000     -0.301140E-02
    2321 5S   102  LYS  HE2     3   0.500000E-01   1.00800           0   0.00000     -0.301140E-02
    2322 5S   102  LYS  NZ     56  -0.300000       14.0070           0   0.00000     -0.301140E-02
    2323 5S   102  LYS  HZ1     2   0.330000       1.00800           0   0.00000     -0.301140E-02
    2324 5S   102  LYS  HZ2     2   0.330000       1.00800           0   0.00000     -0.301140E-02
    2325 5S   102  LYS  HZ3     2   0.330000       1.00800           0   0.00000     -0.301140E-02
    2326 5S   102  LYS  C      20   0.510000       12.0110           0   0.00000     -0.301140E-02
    2327 5S   102  LYS  O      70  -0.510000       15.9990           0   0.00000     -0.301140E-02
    2328 5S   103  ASP  N      54  -0.470000       14.0070           0   0.00000     -0.301140E-02
    2329 5S   103  ASP  HN      1   0.310000       1.00800           0   0.00000     -0.301140E-02
    2330 5S   103  ASP  CA     22   0.700000E-01   12.0110           0   0.00000     -0.301140E-02
    2331 5S   103  ASP  HA      6   0.900000E-01   1.00800           0   0.00000     -0.301140E-02
    2332 5S   103  ASP  CB     23  -0.280000       12.0110           0   0.00000     -0.301140E-02
    2333 5S   103  ASP  HB1     3   0.900000E-01   1.00800           0   0.00000     -0.301140E-02
    2334 5S   103  ASP  HB2     3   0.900000E-01   1.00800           0   0.00000     -0.301140E-02
    2335 5S   103  ASP  CG     32   0.620000       12.0110           0   0.00000     -0.301140E-02
    2336 5S   103  ASP  OD1    72  -0.760000       15.9990           0   0.00000     -0.301140E-02
    2337 5S   103  ASP  OD2    72  -0.760000       15.9990           0   0.00000     -0.301140E-02
    2338 5S   103  ASP  C      20   0.510000       12.0110           0   0.00000     -0.301140E-02
    2339 5S   103  ASP  O      70  -0.510000       15.9990           0   0.00000     -0.301140E-02
    2340 5S   104  LEU  N      54  -0.470000       14.0070           0   0.00000     -0.301140E-02
    2341 5S   104  LEU  HN      1   0.310000       1.00800           0   0.00000     -0.301140E-02
    2342 5S   104  LEU  CA     22   0.700000E-01   12.0110           0   0.00000     -0.301140E-02
    2343 5S   104  LEU  HA      6   0.900000E-01   1.00800           0   0.00000     -0.301140E-02
    2344 5S   104  LEU  CB     23  -0.180000       12.0110           0   0.00000     -0.301140E-02
    2345 5S   104  LEU  HB1     3   0.900000E-01   1.00800           0   0.00000     -0.301140E-02
    2346 5S   104  LEU  HB2     3   0.900000E-01   1.00800           0   0.00000     -0.301140E-02
    2347 5S   104  LEU  CG     22  -0.900000E-01   12.0110           0   0.00000     -0.301140E-02
    2348 5S   104  LEU  HG      3   0.900000E-01   1.00800           0   0.00000     -0.301140E-02
    2349 5S   104  LEU  CD1    24  -0.270000       12.0110           0   0.00000     -0.301140E-02
    2350 5S   104  LEU  HD11    3   0.900000E-01   1.00800           0   0.00000     -0.301140E-02
    2351 5S   104  LEU  HD12    3   0.900000E-01   1.00800           0   0.00000     -0.301140E-02
    2352 5S   104  LEU  HD13    3   0.900000E-01   1.00800           0   0.00000     -0.301140E-02
    2353 5S   104  LEU  CD2    24  -0.270000       12.0110           0   0.00000     -0.301140E-02
    2354 5S   104  LEU  HD21    3   0.900000E-01   1.00800           0   0.00000     -0.301140E-02
    2355 5S   104  LEU  HD22    3   0.900000E-01   1.00800           0   0.00000     -0.301140E-02
    2356 5S   104  LEU  HD23    3   0.900000E-01   1.00800           0   0.00000     -0.301140E-02
    2357 5S   104  LEU  C      20   0.510000       12.0110           0   0.00000     -0.301140E-02
    2358 5S   104  LEU  O      70  -0.510000       15.9990           0   0.00000     -0.301140E-02
    2359 5S   105  SER  N      54  -0.470000       14.0070           0   0.00000     -0.301140E-02
    2360 5S   105  SER  HN      1   0.310000       1.00800           0   0.00000     -0.301140E-02
    2361 5S   105  SER  CA     22   0.700000E-01   12.0110           0   0.00000     -0.301140E-02
    2362 5S   105  SER  HA      6   0.900000E-01   1.00800           0   0.00000     -0.301140E-02
    2363 5S   105  SER  CB     23   0.500000E-01   12.0110           0   0.00000     -0.301140E-02
    2364 5S   105  SER  HB1     3   0.900000E-01   1.00800           0   0.00000     -0.301140E-02
    2365 5S   105  SER  HB2     3   0.900000E-01   1.00800           0   0.00000     -0.301140E-02
    2366 5S   105  SER  OG     73  -0.660000       15.9990           0   0.00000     -0.301140E-02
    2367 5S   105  SER  HG1     1   0.430000       1.00800           0   0.00000     -0.301140E-02
    2368 5S   105  SER  C      20   0.510000       12.0110           0   0.00000     -0.301140E-02
    2369 5S   105  SER  O      70  -0.510000       15.9990           0   0.00000     -0.301140E-02
    2370 5S   106  PRO  N      50  -0.290000       14.0070           0   0.00000     -0.301140E-02
    2371 5S   106  PRO  CD     31    0.00000       12.0110           0   0.00000     -0.301140E-02
    2372 5S   106  PRO  HD1     3   0.900000E-01   1.00800           0   0.00000     -0.301140E-02
    2373 5S   106  PRO  HD2     3   0.900000E-01   1.00800           0   0.00000     -0.301140E-02
    2374 5S   106  PRO  CA     29   0.200000E-01   12.0110           0   0.00000     -0.301140E-02
    2375 5S   106  PRO  HA      6   0.900000E-01   1.00800           0   0.00000     -0.301140E-02
    2376 5S   106  PRO  CB     30  -0.180000       12.0110           0   0.00000     -0.301140E-02
    2377 5S   106  PRO  HB1     3   0.900000E-01   1.00800           0   0.00000     -0.301140E-02
    2378 5S   106  PRO  HB2     3   0.900000E-01   1.00800           0   0.00000     -0.301140E-02
    2379 5S   106  PRO  CG     30  -0.180000       12.0110           0   0.00000     -0.301140E-02
    2380 5S   106  PRO  HG1     3   0.900000E-01   1.00800           0   0.00000     -0.301140E-02
    2381 5S   106  PRO  HG2     3   0.900000E-01   1.00800           0   0.00000     -0.301140E-02
    2382 5S   106  PRO  C      20   0.510000       12.0110           0   0.00000     -0.301140E-02
    2383 5S   106  PRO  O      70  -0.510000       15.9990           0   0.00000     -0.301140E-02
    2384 5S   107  ARG  N      54  -0.470000       14.0070           0   0.00000     -0.301140E-02
    2385 5S   107  ARG  HN      1   0.310000       1.00800           0   0.00000     -0.301140E-02
    2386 5S   107  ARG  CA     22   0.700000E-01   12.0110           0   0.00000     -0.301140E-02
    2387 5S   107  ARG  HA      6   0.900000E-01   1.00800           0   0.00000     -0.301140E-02
    2388 5S   107  ARG  CB     23  -0.180000       12.0110           0   0.00000     -0.301140E-02
    2389 5S   107  ARG  HB1     3   0.900000E-01   1.00800           0   0.00000     -0.301140E-02
    2390 5S   107  ARG  HB2     3   0.900000E-01   1.00800           0   0.00000     -0.301140E-02
    2391 5S   107  ARG  CG     23  -0.180000       12.0110           0   0.00000     -0.301140E-02
    2392 5S   107  ARG  HG1     3   0.900000E-01   1.00800           0   0.00000     -0.301140E-02
    2393 5S   107  ARG  HG2     3   0.900000E-01   1.00800           0   0.00000     -0.301140E-02
    2394 5S   107  ARG  CD     23   0.200000       12.0110           0   0.00000     -0.301140E-02
    2395 5S   107  ARG  HD1     3   0.900000E-01   1.00800           0   0.00000     -0.301140E-02
    2396 5S   107  ARG  HD2     3   0.900000E-01   1.00800           0   0.00000     -0.301140E-02
    2397 5S   107  ARG  NE     57  -0.700000       14.0070           0   0.00000     -0.301140E-02
    2398 5S   107  ARG  HE      2   0.440000       1.00800           0   0.00000     -0.301140E-02
    2399 5S   107  ARG  CZ     20   0.640000       12.0110           0   0.00000     -0.301140E-02
    2400 5S   107  ARG  NH1    57  -0.800000       14.0070           0   0.00000     -0.301140E-02
    2401 5S   107  ARG  HH11    2   0.460000       1.00800           0   0.00000     -0.301140E-02
    2402 5S   107  ARG  HH12    2   0.460000       1.00800           0   0.00000     -0.301140E-02
    2403 5S   107  ARG  NH2    57  -0.800000       14.0070           0   0.00000     -0.301140E-02
    2404 5S   107  ARG  HH21    2   0.460000       1.00800           0   0.00000     -0.301140E-02
    2405 5S   107  ARG  HH22    2   0.460000       1.00800           0   0.00000     -0.301140E-02
    2406 5S   107  ARG  C      20   0.510000       12.0110           0   0.00000     -0.301140E-02
    2407 5S   107  ARG  O      70  -0.510000       15.9990           0   0.00000     -0.301140E-02
    2408 5S   108  TRP  N      54  -0.470000       14.0070           0   0.00000     -0.301140E-02
    2409 5S   108  TRP  HN      1   0.310000       1.00800           0   0.00000     -0.301140E-02
    2410 5S   108  TRP  CA     22   0.700000E-01   12.0110           0   0.00000     -0.301140E-02
    2411 5S   108  TRP  HA      6   0.900000E-01   1.00800           0   0.00000     -0.301140E-02
    2412 5S   108  TRP  CB     23  -0.180000       12.0110           0   0.00000     -0.301140E-02
    2413 5S   108  TRP  HB1     3   0.900000E-01   1.00800           0   0.00000     -0.301140E-02
    2414 5S   108  TRP  HB2     3   0.900000E-01   1.00800           0   0.00000     -0.301140E-02
    2415 5S   108  TRP  CG     28  -0.300000E-01   12.0110           0   0.00000     -0.301140E-02
    2416 5S   108  TRP  CD1    21   0.350000E-01   12.0110           0   0.00000     -0.301140E-02
    2417 5S   108  TRP  HD1     5   0.115000       1.00800           0   0.00000     -0.301140E-02
    2418 5S   108  TRP  NE1    58  -0.610000       14.0070           0   0.00000     -0.301140E-02
    2419 5S   108  TRP  HE1     1   0.380000       1.00800           0   0.00000     -0.301140E-02
    2420 5S   108  TRP  CE2    27   0.130000       12.0110           0   0.00000     -0.301140E-02
    2421 5S   108  TRP  CD2    27  -0.200000E-01   12.0110           0   0.00000     -0.301140E-02
    2422 5S   108  TRP  CE3    21  -0.115000       12.0110           0   0.00000     -0.301140E-02
    2423 5S   108  TRP  HE3     5   0.115000       1.00800           0   0.00000     -0.301140E-02
    2424 5S   108  TRP  CZ3    21  -0.115000       12.0110           0   0.00000     -0.301140E-02
    2425 5S   108  TRP  HZ3     5   0.115000       1.00800           0   0.00000     -0.301140E-02
    2426 5S   108  TRP  CZ2    21  -0.115000       12.0110           0   0.00000     -0.301140E-02
    2427 5S   108  TRP  HZ2     5   0.115000       1.00800           0   0.00000     -0.301140E-02
    2428 5S   108  TRP  CH2    21  -0.115000       12.0110           0   0.00000     -0.301140E-02
    2429 5S   108  TRP  HH2     5   0.115000       1.00800           0   0.00000     -0.301140E-02
    2430 5S   108  TRP  C      20   0.510000       12.0110           0   0.00000     -0.301140E-02
    2431 5S   108  TRP  O      70  -0.510000       15.9990           0   0.00000     -0.301140E-02
    2432 5S   109  TYR  N      54  -0.470000       14.0070           0   0.00000     -0.301140E-02
    2433 5S   109  TYR  HN      1   0.310000       1.00800           0   0.00000     -0.301140E-02
    2434 5S   109  TYR  CA     22   0.700000E-01   12.0110           0   0.00000     -0.301140E-02
    2435 5S   109  TYR  HA      6   0.900000E-01   1.00800           0   0.00000     -0.301140E-02
    2436 5S   109  TYR  CB     23  -0.180000       12.0110           0   0.00000     -0.301140E-02
    2437 5S   109  TYR  HB1     3   0.900000E-01   1.00800           0   0.00000     -0.301140E-02
    2438 5S   109  TYR  HB2     3   0.900000E-01   1.00800           0   0.00000     -0.301140E-02
    2439 5S   109  TYR  CG     21    0.00000       12.0110           0   0.00000     -0.301140E-02
    2440 5S   109  TYR  CD1    21  -0.115000       12.0110           0   0.00000     -0.301140E-02
    2441 5S   109  TYR  HD1     5   0.115000       1.00800           0   0.00000     -0.301140E-02
    2442 5S   109  TYR  CE1    21  -0.115000       12.0110           0   0.00000     -0.301140E-02
    2443 5S   109  TYR  HE1     5   0.115000       1.00800           0   0.00000     -0.301140E-02
    2444 5S   109  TYR  CZ     21   0.110000       12.0110           0   0.00000     -0.301140E-02
    2445 5S   109  TYR  OH     73  -0.540000       15.9990           0   0.00000     -0.301140E-02
    2446 5S   109  TYR  HH      1   0.430000       1.00800           0   0.00000     -0.301140E-02
    2447 5S   109  TYR  CD2    21  -0.115000       12.0110           0   0.00000     -0.301140E-02
    2448 5S   109  TYR  HD2     5   0.115000       1.00800           0   0.00000     -0.301140E-02
    2449 5S   109  TYR  CE2    21  -0.115000       12.0110           0   0.00000     -0.301140E-02
    2450 5S   109  TYR  HE2     5   0.115000       1.00800           0   0.00000     -0.301140E-02
    2451 5S   109  TYR  C      20   0.510000       12.0110           0   0.00000     -0.301140E-02
    2452 5S   109  TYR  O      70  -0.510000       15.9990           0   0.00000     -0.301140E-02
    2453 5S   110  PHE  N      54  -0.470000       14.0070           0   0.00000     -0.301140E-02
    2454 5S   110  PHE  HN      1   0.310000       1.00800           0   0.00000     -0.301140E-02
    2455 5S   110  PHE  CA     22   0.700000E-01   12.0110           0   0.00000     -0.301140E-02
    2456 5S   110  PHE  HA      6   0.900000E-01   1.00800           0   0.00000     -0.301140E-02
    2457 5S   110  PHE  CB     23  -0.180000       12.0110           0   0.00000     -0.301140E-02
    2458 5S   110  PHE  HB1     3   0.900000E-01   1.00800           0   0.00000     -0.301140E-02
    2459 5S   110  PHE  HB2     3   0.900000E-01   1.00800           0   0.00000     -0.301140E-02
    2460 5S   110  PHE  CG     21    0.00000       12.0110           0   0.00000     -0.301140E-02
    2461 5S   110  PHE  CD1    21  -0.115000       12.0110           0   0.00000     -0.301140E-02
    2462 5S   110  PHE  HD1     5   0.115000       1.00800           0   0.00000     -0.301140E-02
    2463 5S   110  PHE  CE1    21  -0.115000       12.0110           0   0.00000     -0.301140E-02
    2464 5S   110  PHE  HE1     5   0.115000       1.00800           0   0.00000     -0.301140E-02
    2465 5S   110  PHE  CZ     21  -0.115000       12.0110           0   0.00000     -0.301140E-02
    2466 5S   110  PHE  HZ      5   0.115000       1.00800           0   0.00000     -0.301140E-02
    2467 5S   110  PHE  CD2    21  -0.115000       12.0110           0   0.00000     -0.301140E-02
    2468 5S   110  PHE  HD2     5   0.115000       1.00800           0   0.00000     -0.301140E-02
    2469 5S   110  PHE  CE2    21  -0.115000       12.0110           0   0.00000     -0.301140E-02
    2470 5S   110  PHE  HE2     5   0.115000       1.00800           0   0.00000     -0.301140E-02
    2471 5S   110  PHE  C      20   0.510000       12.0110           0   0.00000     -0.301140E-02
    2472 5S   110  PHE  O      70  -0.510000       15.9990           0   0.00000     -0.301140E-02
    2473 5S   111  TYR  N      54  -0.470000       14.0070           0   0.00000     -0.301140E-02
    2474 5S   111  TYR  HN      1   0.310000       1.00800           0   0.00000     -0.301140E-02
    2475 5S   111  TYR  CA     22   0.700000E-01   12.0110           0   0.00000     -0.301140E-02
    2476 5S   111  TYR  HA      6   0.900000E-01   1.00800           0   0.00000     -0.301140E-02
    2477 5S   111  TYR  CB     23  -0.180000       12.0110           0   0.00000     -0.301140E-02
    2478 5S   111  TYR  HB1     3   0.900000E-01   1.00800           0   0.00000     -0.301140E-02
    2479 5S   111  TYR  HB2     3   0.900000E-01   1.00800           0   0.00000     -0.301140E-02
    2480 5S   111  TYR  CG     21    0.00000       12.0110           0   0.00000     -0.301140E-02
    2481 5S   111  TYR  CD1    21  -0.115000       12.0110           0   0.00000     -0.301140E-02
    2482 5S   111  TYR  HD1     5   0.115000       1.00800           0   0.00000     -0.301140E-02
    2483 5S   111  TYR  CE1    21  -0.115000       12.0110           0   0.00000     -0.301140E-02
    2484 5S   111  TYR  HE1     5   0.115000       1.00800           0   0.00000     -0.301140E-02
    2485 5S   111  TYR  CZ     21   0.110000       12.0110           0   0.00000     -0.301140E-02
    2486 5S   111  TYR  OH     73  -0.540000       15.9990           0   0.00000     -0.301140E-02
    2487 5S   111  TYR  HH      1   0.430000       1.00800           0   0.00000     -0.301140E-02
    2488 5S   111  TYR  CD2    21  -0.115000       12.0110           0   0.00000     -0.301140E-02
    2489 5S   111  TYR  HD2     5   0.115000       1.00800           0   0.00000     -0.301140E-02
    2490 5S   111  TYR  CE2    21  -0.115000       12.0110           0   0.00000     -0.301140E-02
    2491 5S   111  TYR  HE2     5   0.115000       1.00800           0   0.00000     -0.301140E-02
    2492 5S   111  TYR  C      20   0.510000       12.0110           0   0.00000     -0.301140E-02
    2493 5S   111  TYR  O      70  -0.510000       15.9990           0   0.00000     -0.301140E-02
    2494 5S   112  TYR  N      54  -0.470000       14.0070           0   0.00000     -0.301140E-02
    2495 5S   112  TYR  HN      1   0.310000       1.00800           0   0.00000     -0.301140E-02
    2496 5S   112  TYR  CA     22   0.700000E-01   12.0110           0   0.00000     -0.301140E-02
    2497 5S   112  TYR  HA      6   0.900000E-01   1.00800           0   0.00000     -0.301140E-02
    2498 5S   112  TYR  CB     23  -0.180000       12.0110           0   0.00000     -0.301140E-02
    2499 5S   112  TYR  HB1     3   0.900000E-01   1.00800           0   0.00000     -0.301140E-02
    2500 5S   112  TYR  HB2     3   0.900000E-01   1.00800           0   0.00000     -0.301140E-02
    2501 5S   112  TYR  CG     21    0.00000       12.0110           0   0.00000     -0.301140E-02
    2502 5S   112  TYR  CD1    21  -0.115000       12.0110           0   0.00000     -0.301140E-02
    2503 5S   112  TYR  HD1     5   0.115000       1.00800           0   0.00000     -0.301140E-02
    2504 5S   112  TYR  CE1    21  -0.115000       12.0110           0   0.00000     -0.301140E-02
    2505 5S   112  TYR  HE1     5   0.115000       1.00800           0   0.00000     -0.301140E-02
    2506 5S   112  TYR  CZ     21   0.110000       12.0110           0   0.00000     -0.301140E-02
    2507 5S   112  TYR  OH     73  -0.540000       15.9990           0   0.00000     -0.301140E-02
    2508 5S   112  TYR  HH      1   0.430000       1.00800           0   0.00000     -0.301140E-02
    2509 5S   112  TYR  CD2    21  -0.115000       12.0110           0   0.00000     -0.301140E-02
    2510 5S   112  TYR  HD2     5   0.115000       1.00800           0   0.00000     -0.301140E-02
    2511 5S   112  TYR  CE2    21  -0.115000       12.0110           0   0.00000     -0.301140E-02
    2512 5S   112  TYR  HE2     5   0.115000       1.00800           0   0.00000     -0.301140E-02
    2513 5S   112  TYR  C      20   0.510000       12.0110           0   0.00000     -0.301140E-02
    2514 5S   112  TYR  O      70  -0.510000       15.9990           0   0.00000     -0.301140E-02
    2515 5S   113  LEU  N      54  -0.470000       14.0070           0   0.00000     -0.301140E-02
    2516 5S   113  LEU  HN      1   0.310000       1.00800           0   0.00000     -0.301140E-02
    2517 5S   113  LEU  CA     22   0.700000E-01   12.0110           0   0.00000     -0.301140E-02
    2518 5S   113  LEU  HA      6   0.900000E-01   1.00800           0   0.00000     -0.301140E-02
    2519 5S   113  LEU  CB     23  -0.180000       12.0110           0   0.00000     -0.301140E-02
    2520 5S   113  LEU  HB1     3   0.900000E-01   1.00800           0   0.00000     -0.301140E-02
    2521 5S   113  LEU  HB2     3   0.900000E-01   1.00800           0   0.00000     -0.301140E-02
    2522 5S   113  LEU  CG     22  -0.900000E-01   12.0110           0   0.00000     -0.301140E-02
    2523 5S   113  LEU  HG      3   0.900000E-01   1.00800           0   0.00000     -0.301140E-02
    2524 5S   113  LEU  CD1    24  -0.270000       12.0110           0   0.00000     -0.301140E-02
    2525 5S   113  LEU  HD11    3   0.900000E-01   1.00800           0   0.00000     -0.301140E-02
    2526 5S   113  LEU  HD12    3   0.900000E-01   1.00800           0   0.00000     -0.301140E-02
    2527 5S   113  LEU  HD13    3   0.900000E-01   1.00800           0   0.00000     -0.301140E-02
    2528 5S   113  LEU  CD2    24  -0.270000       12.0110           0   0.00000     -0.301140E-02
    2529 5S   113  LEU  HD21    3   0.900000E-01   1.00800           0   0.00000     -0.301140E-02
    2530 5S   113  LEU  HD22    3   0.900000E-01   1.00800           0   0.00000     -0.301140E-02
    2531 5S   113  LEU  HD23    3   0.900000E-01   1.00800           0   0.00000     -0.301140E-02
    2532 5S   113  LEU  C      20   0.510000       12.0110           0   0.00000     -0.301140E-02
    2533 5S   113  LEU  O      70  -0.510000       15.9990           0   0.00000     -0.301140E-02
    2534 5S   114  GLY  N      54  -0.470000       14.0070           0   0.00000     -0.301140E-02
    2535 5S   114  GLY  HN      1   0.310000       1.00800           0   0.00000     -0.301140E-02
    2536 5S   114  GLY  CA     23  -0.200000E-01   12.0110           0   0.00000     -0.301140E-02
    2537 5S   114  GLY  HA1     6   0.900000E-01   1.00800           0   0.00000     -0.301140E-02
    2538 5S   114  GLY  HA2     6   0.900000E-01   1.00800           0   0.00000     -0.301140E-02
    2539 5S   114  GLY  C      20   0.510000       12.0110           0   0.00000     -0.301140E-02
    2540 5S   114  GLY  O      70  -0.510000       15.9990           0   0.00000     -0.301140E-02
    2541 5S   115  THR  N      54  -0.470000       14.0070           0   0.00000     -0.301140E-02
    2542 5S   115  THR  HN      1   0.310000       1.00800           0   0.00000     -0.301140E-02
    2543 5S   115  THR  CA     22   0.700000E-01   12.0110           0   0.00000     -0.301140E-02
    2544 5S   115  THR  HA      6   0.900000E-01   1.00800           0   0.00000     -0.301140E-02
    2545 5S   115  THR  CB     22   0.140000       12.0110           0   0.00000     -0.301140E-02
    2546 5S   115  THR  HB      3   0.900000E-01   1.00800           0   0.00000     -0.301140E-02
    2547 5S   115  THR  OG1    73  -0.660000       15.9990           0   0.00000     -0.301140E-02
    2548 5S   115  THR  HG1     1   0.430000       1.00800           0   0.00000     -0.301140E-02
    2549 5S   115  THR  CG2    24  -0.270000       12.0110           0   0.00000     -0.301140E-02
    2550 5S   115  THR  HG21    3   0.900000E-01   1.00800           0   0.00000     -0.301140E-02
    2551 5S   115  THR  HG22    3   0.900000E-01   1.00800           0   0.00000     -0.301140E-02
    2552 5S   115  THR  HG23    3   0.900000E-01   1.00800           0   0.00000     -0.301140E-02
    2553 5S   115  THR  C      20   0.510000       12.0110           0   0.00000     -0.301140E-02
    2554 5S   115  THR  O      70  -0.510000       15.9990           0   0.00000     -0.301140E-02
    2555 5S   116  GLY  N      54  -0.470000       14.0070           0   0.00000     -0.301140E-02
    2556 5S   116  GLY  HN      1   0.310000       1.00800           0   0.00000     -0.301140E-02
    2557 5S   116  GLY  CA     23  -0.200000E-01   12.0110           0   0.00000     -0.301140E-02
    2558 5S   116  GLY  HA1     6   0.900000E-01   1.00800           0   0.00000     -0.301140E-02
    2559 5S   116  GLY  HA2     6   0.900000E-01   1.00800           0   0.00000     -0.301140E-02
    2560 5S   116  GLY  C      20   0.510000       12.0110           0   0.00000     -0.301140E-02
    2561 5S   116  GLY  O      70  -0.510000       15.9990           0   0.00000     -0.301140E-02
    2562 5S   117  PRO  N      50  -0.290000       14.0070           0   0.00000     -0.301140E-02
    2563 5S   117  PRO  CD     31    0.00000       12.0110           0   0.00000     -0.301140E-02
    2564 5S   117  PRO  HD1     3   0.900000E-01   1.00800           0   0.00000     -0.301140E-02
    2565 5S   117  PRO  HD2     3   0.900000E-01   1.00800           0   0.00000     -0.301140E-02
    2566 5S   117  PRO  CA     29   0.200000E-01   12.0110           0   0.00000     -0.301140E-02
    2567 5S   117  PRO  HA      6   0.900000E-01   1.00800           0   0.00000     -0.301140E-02
    2568 5S   117  PRO  CB     30  -0.180000       12.0110           0   0.00000     -0.301140E-02
    2569 5S   117  PRO  HB1     3   0.900000E-01   1.00800           0   0.00000     -0.301140E-02
    2570 5S   117  PRO  HB2     3   0.900000E-01   1.00800           0   0.00000     -0.301140E-02
    2571 5S   117  PRO  CG     30  -0.180000       12.0110           0   0.00000     -0.301140E-02
    2572 5S   117  PRO  HG1     3   0.900000E-01   1.00800           0   0.00000     -0.301140E-02
    2573 5S   117  PRO  HG2     3   0.900000E-01   1.00800           0   0.00000     -0.301140E-02
    2574 5S   117  PRO  C      20   0.510000       12.0110           0   0.00000     -0.301140E-02
    2575 5S   117  PRO  O      70  -0.510000       15.9990           0   0.00000     -0.301140E-02
    2576 5S   118  GLU  N      54  -0.470000       14.0070           0   0.00000     -0.301140E-02
    2577 5S   118  GLU  HN      1   0.310000       1.00800           0   0.00000     -0.301140E-02
    2578 5S   118  GLU  CA     22   0.700000E-01   12.0110           0   0.00000     -0.301140E-02
    2579 5S   118  GLU  HA      6   0.900000E-01   1.00800           0   0.00000     -0.301140E-02
    2580 5S   118  GLU  CB     23  -0.180000       12.0110           0   0.00000     -0.301140E-02
    2581 5S   118  GLU  HB1     3   0.900000E-01   1.00800           0   0.00000     -0.301140E-02
    2582 5S   118  GLU  HB2     3   0.900000E-01   1.00800           0   0.00000     -0.301140E-02
    2583 5S   118  GLU  CG     23  -0.280000       12.0110           0   0.00000     -0.301140E-02
    2584 5S   118  GLU  HG1     3   0.900000E-01   1.00800           0   0.00000     -0.301140E-02
    2585 5S   118  GLU  HG2     3   0.900000E-01   1.00800           0   0.00000     -0.301140E-02
    2586 5S   118  GLU  CD     32   0.620000       12.0110           0   0.00000     -0.301140E-02
    2587 5S   118  GLU  OE1    72  -0.760000       15.9990           0   0.00000     -0.301140E-02
    2588 5S   118  GLU  OE2    72  -0.760000       15.9990           0   0.00000     -0.301140E-02
    2589 5S   118  GLU  C      20   0.510000       12.0110           0   0.00000     -0.301140E-02
    2590 5S   118  GLU  O      70  -0.510000       15.9990           0   0.00000     -0.301140E-02
    2591 5S   119  ALA  N      54  -0.470000       14.0070           0   0.00000     -0.301140E-02
    2592 5S   119  ALA  HN      1   0.310000       1.00800           0   0.00000     -0.301140E-02
    2593 5S   119  ALA  CA     22   0.700000E-01   12.0110           0   0.00000     -0.301140E-02
    2594 5S   119  ALA  HA      6   0.900000E-01   1.00800           0   0.00000     -0.301140E-02
    2595 5S   119  ALA  CB     24  -0.270000       12.0110           0   0.00000     -0.301140E-02
    2596 5S   119  ALA  HB1     3   0.900000E-01   1.00800           0   0.00000     -0.301140E-02
    2597 5S   119  ALA  HB2     3   0.900000E-01   1.00800           0   0.00000     -0.301140E-02
    2598 5S   119  ALA  HB3     3   0.900000E-01   1.00800           0   0.00000     -0.301140E-02
    2599 5S   119  ALA  C      20   0.510000       12.0110           0   0.00000     -0.301140E-02
    2600 5S   119  ALA  O      70  -0.510000       15.9990           0   0.00000     -0.301140E-02
    2601 5S   120  GLY  N      54  -0.470000       14.0070           0   0.00000     -0.301140E-02
    2602 5S   120  GLY  HN      1   0.310000       1.00800           0   0.00000     -0.301140E-02
    2603 5S   120  GLY  CA     23  -0.200000E-01   12.0110           0   0.00000     -0.301140E-02
    2604 5S   120  GLY  HA1     6   0.900000E-01   1.00800           0   0.00000     -0.301140E-02
    2605 5S   120  GLY  HA2     6   0.900000E-01   1.00800           0   0.00000     -0.301140E-02
    2606 5S   120  GLY  C      20   0.510000       12.0110           0   0.00000     -0.301140E-02
    2607 5S   120  GLY  O      70  -0.510000       15.9990           0   0.00000     -0.301140E-02
    2608 5S   121  LEU  N      54  -0.470000       14.0070           0   0.00000     -0.301140E-02
    2609 5S   121  LEU  HN      1   0.310000       1.00800           0   0.00000     -0.301140E-02
    2610 5S   121  LEU  CA     22   0.700000E-01   12.0110           0   0.00000     -0.301140E-02
    2611 5S   121  LEU  HA      6   0.900000E-01   1.00800           0   0.00000     -0.301140E-02
    2612 5S   121  LEU  CB     23  -0.180000       12.0110           0   0.00000     -0.301140E-02
    2613 5S   121  LEU  HB1     3   0.900000E-01   1.00800           0   0.00000     -0.301140E-02
    2614 5S   121  LEU  HB2     3   0.900000E-01   1.00800           0   0.00000     -0.301140E-02
    2615 5S   121  LEU  CG     22  -0.900000E-01   12.0110           0   0.00000     -0.301140E-02
    2616 5S   121  LEU  HG      3   0.900000E-01   1.00800           0   0.00000     -0.301140E-02
    2617 5S   121  LEU  CD1    24  -0.270000       12.0110           0   0.00000     -0.301140E-02
    2618 5S   121  LEU  HD11    3   0.900000E-01   1.00800           0   0.00000     -0.301140E-02
    2619 5S   121  LEU  HD12    3   0.900000E-01   1.00800           0   0.00000     -0.301140E-02
    2620 5S   121  LEU  HD13    3   0.900000E-01   1.00800           0   0.00000     -0.301140E-02
    2621 5S   121  LEU  CD2    24  -0.270000       12.0110           0   0.00000     -0.301140E-02
    2622 5S   121  LEU  HD21    3   0.900000E-01   1.00800           0   0.00000     -0.301140E-02
    2623 5S   121  LEU  HD22    3   0.900000E-01   1.00800           0   0.00000     -0.301140E-02
    2624 5S   121  LEU  HD23    3   0.900000E-01   1.00800           0   0.00000     -0.301140E-02
    2625 5S   121  LEU  C      20   0.510000       12.0110           0   0.00000     -0.301140E-02
    2626 5S   121  LEU  O      70  -0.510000       15.9990           0   0.00000     -0.301140E-02
    2627 5S   122  PRO  N      50  -0.290000       14.0070           0   0.00000     -0.301140E-02
    2628 5S   122  PRO  CD     31    0.00000       12.0110           0   0.00000     -0.301140E-02
    2629 5S   122  PRO  HD1     3   0.900000E-01   1.00800           0   0.00000     -0.301140E-02
    2630 5S   122  PRO  HD2     3   0.900000E-01   1.00800           0   0.00000     -0.301140E-02
    2631 5S   122  PRO  CA     29   0.200000E-01   12.0110           0   0.00000     -0.301140E-02
    2632 5S   122  PRO  HA      6   0.900000E-01   1.00800           0   0.00000     -0.301140E-02
    2633 5S   122  PRO  CB     30  -0.180000       12.0110           0   0.00000     -0.301140E-02
    2634 5S   122  PRO  HB1     3   0.900000E-01   1.00800           0   0.00000     -0.301140E-02
    2635 5S   122  PRO  HB2     3   0.900000E-01   1.00800           0   0.00000     -0.301140E-02
    2636 5S   122  PRO  CG     30  -0.180000       12.0110           0   0.00000     -0.301140E-02
    2637 5S   122  PRO  HG1     3   0.900000E-01   1.00800           0   0.00000     -0.301140E-02
    2638 5S   122  PRO  HG2     3   0.900000E-01   1.00800           0   0.00000     -0.301140E-02
    2639 5S   122  PRO  C      20   0.510000       12.0110           0   0.00000     -0.301140E-02
    2640 5S   122  PRO  O      70  -0.510000       15.9990           0   0.00000     -0.301140E-02
    2641 5S   123  TYR  N      54  -0.470000       14.0070           0   0.00000     -0.301140E-02
    2642 5S   123  TYR  HN      1   0.310000       1.00800           0   0.00000     -0.301140E-02
    2643 5S   123  TYR  CA     22   0.700000E-01   12.0110           0   0.00000     -0.301140E-02
    2644 5S   123  TYR  HA      6   0.900000E-01   1.00800           0   0.00000     -0.301140E-02
    2645 5S   123  TYR  CB     23  -0.180000       12.0110           0   0.00000     -0.301140E-02
    2646 5S   123  TYR  HB1     3   0.900000E-01   1.00800           0   0.00000     -0.301140E-02
    2647 5S   123  TYR  HB2     3   0.900000E-01   1.00800           0   0.00000     -0.301140E-02
    2648 5S   123  TYR  CG     21    0.00000       12.0110           0   0.00000     -0.301140E-02
    2649 5S   123  TYR  CD1    21  -0.115000       12.0110           0   0.00000     -0.301140E-02
    2650 5S   123  TYR  HD1     5   0.115000       1.00800           0   0.00000     -0.301140E-02
    2651 5S   123  TYR  CE1    21  -0.115000       12.0110           0   0.00000     -0.301140E-02
    2652 5S   123  TYR  HE1     5   0.115000       1.00800           0   0.00000     -0.301140E-02
    2653 5S   123  TYR  CZ     21   0.110000       12.0110           0   0.00000     -0.301140E-02
    2654 5S   123  TYR  OH     73  -0.540000       15.9990           0   0.00000     -0.301140E-02
    2655 5S   123  TYR  HH      1   0.430000       1.00800           0   0.00000     -0.301140E-02
    2656 5S   123  TYR  CD2    21  -0.115000       12.0110           0   0.00000     -0.301140E-02
    2657 5S   123  TYR  HD2     5   0.115000       1.00800           0   0.00000     -0.301140E-02
    2658 5S   123  TYR  CE2    21  -0.115000       12.0110           0   0.00000     -0.301140E-02
    2659 5S   123  TYR  HE2     5   0.115000       1.00800           0   0.00000     -0.301140E-02
    2660 5S   123  TYR  C      20   0.510000       12.0110           0   0.00000     -0.301140E-02
    2661 5S   123  TYR  O      70  -0.510000       15.9990           0   0.00000     -0.301140E-02
    2662 5S   124  GLY  N      54  -0.470000       14.0070           0   0.00000     -0.301140E-02
    2663 5S   124  GLY  HN      1   0.310000       1.00800           0   0.00000     -0.301140E-02
    2664 5S   124  GLY  CA     23  -0.200000E-01   12.0110           0   0.00000     -0.301140E-02
    2665 5S   124  GLY  HA1     6   0.900000E-01   1.00800           0   0.00000     -0.301140E-02
    2666 5S   124  GLY  HA2     6   0.900000E-01   1.00800           0   0.00000     -0.301140E-02
    2667 5S   124  GLY  C      20   0.510000       12.0110           0   0.00000     -0.301140E-02
    2668 5S   124  GLY  O      70  -0.510000       15.9990           0   0.00000     -0.301140E-02
    2669 5S   125  ALA  N      54  -0.470000       14.0070           0   0.00000     -0.301140E-02
    2670 5S   125  ALA  HN      1   0.310000       1.00800           0   0.00000     -0.301140E-02
    2671 5S   125  ALA  CA     22   0.700000E-01   12.0110           0   0.00000     -0.301140E-02
    2672 5S   125  ALA  HA      6   0.900000E-01   1.00800           0   0.00000     -0.301140E-02
    2673 5S   125  ALA  CB     24  -0.270000       12.0110           0   0.00000     -0.301140E-02
    2674 5S   125  ALA  HB1     3   0.900000E-01   1.00800           0   0.00000     -0.301140E-02
    2675 5S   125  ALA  HB2     3   0.900000E-01   1.00800           0   0.00000     -0.301140E-02
    2676 5S   125  ALA  HB3     3   0.900000E-01   1.00800           0   0.00000     -0.301140E-02
    2677 5S   125  ALA  C      20   0.510000       12.0110           0   0.00000     -0.301140E-02
    2678 5S   125  ALA  O      70  -0.510000       15.9990           0   0.00000     -0.301140E-02
    2679 5S   126  ASN  N      54  -0.470000       14.0070           0   0.00000     -0.301140E-02
    2680 5S   126  ASN  HN      1   0.310000       1.00800           0   0.00000     -0.301140E-02
    2681 5S   126  ASN  CA     22   0.700000E-01   12.0110           0   0.00000     -0.301140E-02
    2682 5S   126  ASN  HA      6   0.900000E-01   1.00800           0   0.00000     -0.301140E-02
    2683 5S   126  ASN  CB     23  -0.180000       12.0110           0   0.00000     -0.301140E-02
    2684 5S   126  ASN  HB1     3   0.900000E-01   1.00800           0   0.00000     -0.301140E-02
    2685 5S   126  ASN  HB2     3   0.900000E-01   1.00800           0   0.00000     -0.301140E-02
    2686 5S   126  ASN  CG     32   0.550000       12.0110           0   0.00000     -0.301140E-02
    2687 5S   126  ASN  OD1    70  -0.550000       15.9990           0   0.00000     -0.301140E-02
    2688 5S   126  ASN  ND2    55  -0.620000       14.0070           0   0.00000     -0.301140E-02
    2689 5S   126  ASN  HD21    1   0.320000       1.00800           0   0.00000     -0.301140E-02
    2690 5S   126  ASN  HD22    1   0.300000       1.00800           0   0.00000     -0.301140E-02
    2691 5S   126  ASN  C      20   0.510000       12.0110           0   0.00000     -0.301140E-02
    2692 5S   126  ASN  O      70  -0.510000       15.9990           0   0.00000     -0.301140E-02
    2693 5S   127  LYS  N      54  -0.470000       14.0070           0   0.00000     -0.301140E-02
    2694 5S   127  LYS  HN      1   0.310000       1.00800           0   0.00000     -0.301140E-02
    2695 5S   127  LYS  CA     22   0.700000E-01   12.0110           0   0.00000     -0.301140E-02
    2696 5S   127  LYS  HA      6   0.900000E-01   1.00800           0   0.00000     -0.301140E-02
    2697 5S   127  LYS  CB     23  -0.180000       12.0110           0   0.00000     -0.301140E-02
    2698 5S   127  LYS  HB1     3   0.900000E-01   1.00800           0   0.00000     -0.301140E-02
    2699 5S   127  LYS  HB2     3   0.900000E-01   1.00800           0   0.00000     -0.301140E-02
    2700 5S   127  LYS  CG     23  -0.180000       12.0110           0   0.00000     -0.301140E-02
    2701 5S   127  LYS  HG1     3   0.900000E-01   1.00800           0   0.00000     -0.301140E-02
    2702 5S   127  LYS  HG2     3   0.900000E-01   1.00800           0   0.00000     -0.301140E-02
    2703 5S   127  LYS  CD     23  -0.180000       12.0110           0   0.00000     -0.301140E-02
    2704 5S   127  LYS  HD1     3   0.900000E-01   1.00800           0   0.00000     -0.301140E-02
    2705 5S   127  LYS  HD2     3   0.900000E-01   1.00800           0   0.00000     -0.301140E-02
    2706 5S   127  LYS  CE     23   0.210000       12.0110           0   0.00000     -0.301140E-02
    2707 5S   127  LYS  HE1     3   0.500000E-01   1.00800           0   0.00000     -0.301140E-02
    2708 5S   127  LYS  HE2     3   0.500000E-01   1.00800           0   0.00000     -0.301140E-02
    2709 5S   127  LYS  NZ     56  -0.300000       14.0070           0   0.00000     -0.301140E-02
    2710 5S   127  LYS  HZ1     2   0.330000       1.00800           0   0.00000     -0.301140E-02
    2711 5S   127  LYS  HZ2     2   0.330000       1.00800           0   0.00000     -0.301140E-02
    2712 5S   127  LYS  HZ3     2   0.330000       1.00800           0   0.00000     -0.301140E-02
    2713 5S   127  LYS  C      20   0.510000       12.0110           0   0.00000     -0.301140E-02
    2714 5S   127  LYS  O      70  -0.510000       15.9990           0   0.00000     -0.301140E-02
    2715 5S   128  ASP  N      54  -0.470000       14.0070           0   0.00000     -0.301140E-02
    2716 5S   128  ASP  HN      1   0.310000       1.00800           0   0.00000     -0.301140E-02
    2717 5S   128  ASP  CA     22   0.700000E-01   12.0110           0   0.00000     -0.301140E-02
    2718 5S   128  ASP  HA      6   0.900000E-01   1.00800           0   0.00000     -0.301140E-02
    2719 5S   128  ASP  CB     23  -0.280000       12.0110           0   0.00000     -0.301140E-02
    2720 5S   128  ASP  HB1     3   0.900000E-01   1.00800           0   0.00000     -0.301140E-02
    2721 5S   128  ASP  HB2     3   0.900000E-01   1.00800           0   0.00000     -0.301140E-02
    2722 5S   128  ASP  CG     32   0.620000       12.0110           0   0.00000     -0.301140E-02
    2723 5S   128  ASP  OD1    72  -0.760000       15.9990           0   0.00000     -0.301140E-02
    2724 5S   128  ASP  OD2    72  -0.760000       15.9990           0   0.00000     -0.301140E-02
    2725 5S   128  ASP  C      20   0.510000       12.0110           0   0.00000     -0.301140E-02
    2726 5S   128  ASP  O      70  -0.510000       15.9990           0   0.00000     -0.301140E-02
    2727 5S   129  GLY  N      54  -0.470000       14.0070           0   0.00000     -0.301140E-02
    2728 5S   129  GLY  HN      1   0.310000       1.00800           0   0.00000     -0.301140E-02
    2729 5S   129  GLY  CA     23  -0.200000E-01   12.0110           0   0.00000     -0.301140E-02
    2730 5S   129  GLY  HA1     6   0.900000E-01   1.00800           0   0.00000     -0.301140E-02
    2731 5S   129  GLY  HA2     6   0.900000E-01   1.00800           0   0.00000     -0.301140E-02
    2732 5S   129  GLY  C      20   0.510000       12.0110           0   0.00000     -0.301140E-02
    2733 5S   129  GLY  O      70  -0.510000       15.9990           0   0.00000     -0.301140E-02
    2734 5S   130  ILE  N      54  -0.470000       14.0070           0   0.00000     -0.301140E-02
    2735 5S   130  ILE  HN      1   0.310000       1.00800           0   0.00000     -0.301140E-02
    2736 5S   130  ILE  CA     22   0.700000E-01   12.0110           0   0.00000     -0.301140E-02
    2737 5S   130  ILE  HA      6   0.900000E-01   1.00800           0   0.00000     -0.301140E-02
    2738 5S   130  ILE  CB     22  -0.900000E-01   12.0110           0   0.00000     -0.301140E-02
    2739 5S   130  ILE  HB      3   0.900000E-01   1.00800           0   0.00000     -0.301140E-02
    2740 5S   130  ILE  CG2    24  -0.270000       12.0110           0   0.00000     -0.301140E-02
    2741 5S   130  ILE  HG21    3   0.900000E-01   1.00800           0   0.00000     -0.301140E-02
    2742 5S   130  ILE  HG22    3   0.900000E-01   1.00800           0   0.00000     -0.301140E-02
    2743 5S   130  ILE  HG23    3   0.900000E-01   1.00800           0   0.00000     -0.301140E-02
    2744 5S   130  ILE  CG1    23  -0.180000       12.0110           0   0.00000     -0.301140E-02
    2745 5S   130  ILE  HG11    3   0.900000E-01   1.00800           0   0.00000     -0.301140E-02
    2746 5S   130  ILE  HG12    3   0.900000E-01   1.00800           0   0.00000     -0.301140E-02
    2747 5S   130  ILE  CD     24  -0.270000       12.0110           0   0.00000     -0.301140E-02
    2748 5S   130  ILE  HD1     3   0.900000E-01   1.00800           0   0.00000     -0.301140E-02
    2749 5S   130  ILE  HD2     3   0.900000E-01   1.00800           0   0.00000     -0.301140E-02
    2750 5S   130  ILE  HD3     3   0.900000E-01   1.00800           0   0.00000     -0.301140E-02
    2751 5S   130  ILE  C      20   0.510000       12.0110           0   0.00000     -0.301140E-02
    2752 5S   130  ILE  O      70  -0.510000       15.9990           0   0.00000     -0.301140E-02
    2753 5S   131  ILE  N      54  -0.470000       14.0070           0   0.00000     -0.301140E-02
    2754 5S   131  ILE  HN      1   0.310000       1.00800           0   0.00000     -0.301140E-02
    2755 5S   131  ILE  CA     22   0.700000E-01   12.0110           0   0.00000     -0.301140E-02
    2756 5S   131  ILE  HA      6   0.900000E-01   1.00800           0   0.00000     -0.301140E-02
    2757 5S   131  ILE  CB     22  -0.900000E-01   12.0110           0   0.00000     -0.301140E-02
    2758 5S   131  ILE  HB      3   0.900000E-01   1.00800           0   0.00000     -0.301140E-02
    2759 5S   131  ILE  CG2    24  -0.270000       12.0110           0   0.00000     -0.301140E-02
    2760 5S   131  ILE  HG21    3   0.900000E-01   1.00800           0   0.00000     -0.301140E-02
    2761 5S   131  ILE  HG22    3   0.900000E-01   1.00800           0   0.00000     -0.301140E-02
    2762 5S   131  ILE  HG23    3   0.900000E-01   1.00800           0   0.00000     -0.301140E-02
    2763 5S   131  ILE  CG1    23  -0.180000       12.0110           0   0.00000     -0.301140E-02
    2764 5S   131  ILE  HG11    3   0.900000E-01   1.00800           0   0.00000     -0.301140E-02
    2765 5S   131  ILE  HG12    3   0.900000E-01   1.00800           0   0.00000     -0.301140E-02
    2766 5S   131  ILE  CD     24  -0.270000       12.0110           0   0.00000     -0.301140E-02
    2767 5S   131  ILE  HD1     3   0.900000E-01   1.00800           0   0.00000     -0.301140E-02
    2768 5S   131  ILE  HD2     3   0.900000E-01   1.00800           0   0.00000     -0.301140E-02
    2769 5S   131  ILE  HD3     3   0.900000E-01   1.00800           0   0.00000     -0.301140E-02
    2770 5S   131  ILE  C      20   0.510000       12.0110           0   0.00000     -0.301140E-02
    2771 5S   131  ILE  O      70  -0.510000       15.9990           0   0.00000     -0.301140E-02
    2772 5S   132  TRP  N      54  -0.470000       14.0070           0   0.00000     -0.301140E-02
    2773 5S   132  TRP  HN      1   0.310000       1.00800           0   0.00000     -0.301140E-02
    2774 5S   132  TRP  CA     22   0.700000E-01   12.0110           0   0.00000     -0.301140E-02
    2775 5S   132  TRP  HA      6   0.900000E-01   1.00800           0   0.00000     -0.301140E-02
    2776 5S   132  TRP  CB     23  -0.180000       12.0110           0   0.00000     -0.301140E-02
    2777 5S   132  TRP  HB1     3   0.900000E-01   1.00800           0   0.00000     -0.301140E-02
    2778 5S   132  TRP  HB2     3   0.900000E-01   1.00800           0   0.00000     -0.301140E-02
    2779 5S   132  TRP  CG     28  -0.300000E-01   12.0110           0   0.00000     -0.301140E-02
    2780 5S   132  TRP  CD1    21   0.350000E-01   12.0110           0   0.00000     -0.301140E-02
    2781 5S   132  TRP  HD1     5   0.115000       1.00800           0   0.00000     -0.301140E-02
    2782 5S   132  TRP  NE1    58  -0.610000       14.0070           0   0.00000     -0.301140E-02
    2783 5S   132  TRP  HE1     1   0.380000       1.00800           0   0.00000     -0.301140E-02
    2784 5S   132  TRP  CE2    27   0.130000       12.0110           0   0.00000     -0.301140E-02
    2785 5S   132  TRP  CD2    27  -0.200000E-01   12.0110           0   0.00000     -0.301140E-02
    2786 5S   132  TRP  CE3    21  -0.115000       12.0110           0   0.00000     -0.301140E-02
    2787 5S   132  TRP  HE3     5   0.115000       1.00800           0   0.00000     -0.301140E-02
    2788 5S   132  TRP  CZ3    21  -0.115000       12.0110           0   0.00000     -0.301140E-02
    2789 5S   132  TRP  HZ3     5   0.115000       1.00800           0   0.00000     -0.301140E-02
    2790 5S   132  TRP  CZ2    21  -0.115000       12.0110           0   0.00000     -0.301140E-02
    2791 5S   132  TRP  HZ2     5   0.115000       1.00800           0   0.00000     -0.301140E-02
    2792 5S   132  TRP  CH2    21  -0.115000       12.0110           0   0.00000     -0.301140E-02
    2793 5S   132  TRP  HH2     5   0.115000       1.00800           0   0.00000     -0.301140E-02
    2794 5S   132  TRP  C      20   0.510000       12.0110           0   0.00000     -0.301140E-02
    2795 5S   132  TRP  O      70  -0.510000       15.9990           0   0.00000     -0.301140E-02
    2796 5S   133  VAL  N      54  -0.470000       14.0070           0   0.00000     -0.301140E-02
    2797 5S   133  VAL  HN      1   0.310000       1.00800           0   0.00000     -0.301140E-02
    2798 5S   133  VAL  CA     22   0.700000E-01   12.0110           0   0.00000     -0.301140E-02
    2799 5S   133  VAL  HA      6   0.900000E-01   1.00800           0   0.00000     -0.301140E-02
    2800 5S   133  VAL  CB     22  -0.900000E-01   12.0110           0   0.00000     -0.301140E-02
    2801 5S   133  VAL  HB      3   0.900000E-01   1.00800           0   0.00000     -0.301140E-02
    2802 5S   133  VAL  CG1    24  -0.270000       12.0110           0   0.00000     -0.301140E-02
    2803 5S   133  VAL  HG11    3   0.900000E-01   1.00800           0   0.00000     -0.301140E-02
    2804 5S   133  VAL  HG12    3   0.900000E-01   1.00800           0   0.00000     -0.301140E-02
    2805 5S   133  VAL  HG13    3   0.900000E-01   1.00800           0   0.00000     -0.301140E-02
    2806 5S   133  VAL  CG2    24  -0.270000       12.0110           0   0.00000     -0.301140E-02
    2807 5S   133  VAL  HG21    3   0.900000E-01   1.00800           0   0.00000     -0.301140E-02
    2808 5S   133  VAL  HG22    3   0.900000E-01   1.00800           0   0.00000     -0.301140E-02
    2809 5S   133  VAL  HG23    3   0.900000E-01   1.00800           0   0.00000     -0.301140E-02
    2810 5S   133  VAL  C      20   0.510000       12.0110           0   0.00000     -0.301140E-02
    2811 5S   133  VAL  O      70  -0.510000       15.9990           0   0.00000     -0.301140E-02
    2812 5S   134  ALA  N      54  -0.470000       14.0070           0   0.00000     -0.301140E-02
    2813 5S   134  ALA  HN      1   0.310000       1.00800           0   0.00000     -0.301140E-02
    2814 5S   134  ALA  CA     22   0.700000E-01   12.0110           0   0.00000     -0.301140E-02
    2815 5S   134  ALA  HA      6   0.900000E-01   1.00800           0   0.00000     -0.301140E-02
    2816 5S   134  ALA  CB     24  -0.270000       12.0110           0   0.00000     -0.301140E-02
    2817 5S   134  ALA  HB1     3   0.900000E-01   1.00800           0   0.00000     -0.301140E-02
    2818 5S   134  ALA  HB2     3   0.900000E-01   1.00800           0   0.00000     -0.301140E-02
    2819 5S   134  ALA  HB3     3   0.900000E-01   1.00800           0   0.00000     -0.301140E-02
    2820 5S   134  ALA  C      20   0.510000       12.0110           0   0.00000     -0.301140E-02
    2821 5S   134  ALA  O      70  -0.510000       15.9990           0   0.00000     -0.301140E-02
    2822 5S   135  THR  N      54  -0.470000       14.0070           0   0.00000     -0.301140E-02
    2823 5S   135  THR  HN      1   0.310000       1.00800           0   0.00000     -0.301140E-02
    2824 5S   135  THR  CA     22   0.700000E-01   12.0110           0   0.00000     -0.301140E-02
    2825 5S   135  THR  HA      6   0.900000E-01   1.00800           0   0.00000     -0.301140E-02
    2826 5S   135  THR  CB     22   0.140000       12.0110           0   0.00000     -0.301140E-02
    2827 5S   135  THR  HB      3   0.900000E-01   1.00800           0   0.00000     -0.301140E-02
    2828 5S   135  THR  OG1    73  -0.660000       15.9990           0   0.00000     -0.301140E-02
    2829 5S   135  THR  HG1     1   0.430000       1.00800           0   0.00000     -0.301140E-02
    2830 5S   135  THR  CG2    24  -0.270000       12.0110           0   0.00000     -0.301140E-02
    2831 5S   135  THR  HG21    3   0.900000E-01   1.00800           0   0.00000     -0.301140E-02
    2832 5S   135  THR  HG22    3   0.900000E-01   1.00800           0   0.00000     -0.301140E-02
    2833 5S   135  THR  HG23    3   0.900000E-01   1.00800           0   0.00000     -0.301140E-02
    2834 5S   135  THR  C      20   0.510000       12.0110           0   0.00000     -0.301140E-02
    2835 5S   135  THR  O      70  -0.510000       15.9990           0   0.00000     -0.301140E-02
    2836 5S   136  GLU  N      54  -0.470000       14.0070           0   0.00000     -0.301140E-02
    2837 5S   136  GLU  HN      1   0.310000       1.00800           0   0.00000     -0.301140E-02
    2838 5S   136  GLU  CA     22   0.700000E-01   12.0110           0   0.00000     -0.301140E-02
    2839 5S   136  GLU  HA      6   0.900000E-01   1.00800           0   0.00000     -0.301140E-02
    2840 5S   136  GLU  CB     23  -0.180000       12.0110           0   0.00000     -0.301140E-02
    2841 5S   136  GLU  HB1     3   0.900000E-01   1.00800           0   0.00000     -0.301140E-02
    2842 5S   136  GLU  HB2     3   0.900000E-01   1.00800           0   0.00000     -0.301140E-02
    2843 5S   136  GLU  CG     23  -0.280000       12.0110           0   0.00000     -0.301140E-02
    2844 5S   136  GLU  HG1     3   0.900000E-01   1.00800           0   0.00000     -0.301140E-02
    2845 5S   136  GLU  HG2     3   0.900000E-01   1.00800           0   0.00000     -0.301140E-02
    2846 5S   136  GLU  CD     32   0.620000       12.0110           0   0.00000     -0.301140E-02
    2847 5S   136  GLU  OE1    72  -0.760000       15.9990           0   0.00000     -0.301140E-02
    2848 5S   136  GLU  OE2    72  -0.760000       15.9990           0   0.00000     -0.301140E-02
    2849 5S   136  GLU  C      20   0.510000       12.0110           0   0.00000     -0.301140E-02
    2850 5S   136  GLU  O      70  -0.510000       15.9990           0   0.00000     -0.301140E-02
    2851 5S   137  GLY  N      54  -0.470000       14.0070           0   0.00000     -0.301140E-02
    2852 5S   137  GLY  HN      1   0.310000       1.00800           0   0.00000     -0.301140E-02
    2853 5S   137  GLY  CA     23  -0.200000E-01   12.0110           0   0.00000     -0.301140E-02
    2854 5S   137  GLY  HA1     6   0.900000E-01   1.00800           0   0.00000     -0.301140E-02
    2855 5S   137  GLY  HA2     6   0.900000E-01   1.00800           0   0.00000     -0.301140E-02
    2856 5S   137  GLY  C      20   0.510000       12.0110           0   0.00000     -0.301140E-02
    2857 5S   137  GLY  O      70  -0.510000       15.9990           0   0.00000     -0.301140E-02
    2858 5S   138  ALA  N      54  -0.470000       14.0070           0   0.00000     -0.301140E-02
    2859 5S   138  ALA  HN      1   0.310000       1.00800           0   0.00000     -0.301140E-02
    2860 5S   138  ALA  CA     22   0.700000E-01   12.0110           0   0.00000     -0.301140E-02
    2861 5S   138  ALA  HA      6   0.900000E-01   1.00800           0   0.00000     -0.301140E-02
    2862 5S   138  ALA  CB     24  -0.270000       12.0110           0   0.00000     -0.301140E-02
    2863 5S   138  ALA  HB1     3   0.900000E-01   1.00800           0   0.00000     -0.301140E-02
    2864 5S   138  ALA  HB2     3   0.900000E-01   1.00800           0   0.00000     -0.301140E-02
    2865 5S   138  ALA  HB3     3   0.900000E-01   1.00800           0   0.00000     -0.301140E-02
    2866 5S   138  ALA  C      20   0.510000       12.0110           0   0.00000     -0.301140E-02
    2867 5S   138  ALA  O      70  -0.510000       15.9990           0   0.00000     -0.301140E-02
    2868 5S   139  LEU  N      54  -0.470000       14.0070           0   0.00000     -0.301140E-02
    2869 5S   139  LEU  HN      1   0.310000       1.00800           0   0.00000     -0.301140E-02
    2870 5S   139  LEU  CA     22   0.700000E-01   12.0110           0   0.00000     -0.301140E-02
    2871 5S   139  LEU  HA      6   0.900000E-01   1.00800           0   0.00000     -0.301140E-02
    2872 5S   139  LEU  CB     23  -0.180000       12.0110           0   0.00000     -0.301140E-02
    2873 5S   139  LEU  HB1     3   0.900000E-01   1.00800           0   0.00000     -0.301140E-02
    2874 5S   139  LEU  HB2     3   0.900000E-01   1.00800           0   0.00000     -0.301140E-02
    2875 5S   139  LEU  CG     22  -0.900000E-01   12.0110           0   0.00000     -0.301140E-02
    2876 5S   139  LEU  HG      3   0.900000E-01   1.00800           0   0.00000     -0.301140E-02
    2877 5S   139  LEU  CD1    24  -0.270000       12.0110           0   0.00000     -0.301140E-02
    2878 5S   139  LEU  HD11    3   0.900000E-01   1.00800           0   0.00000     -0.301140E-02
    2879 5S   139  LEU  HD12    3   0.900000E-01   1.00800           0   0.00000     -0.301140E-02
    2880 5S   139  LEU  HD13    3   0.900000E-01   1.00800           0   0.00000     -0.301140E-02
    2881 5S   139  LEU  CD2    24  -0.270000       12.0110           0   0.00000     -0.301140E-02
    2882 5S   139  LEU  HD21    3   0.900000E-01   1.00800           0   0.00000     -0.301140E-02
    2883 5S   139  LEU  HD22    3   0.900000E-01   1.00800           0   0.00000     -0.301140E-02
    2884 5S   139  LEU  HD23    3   0.900000E-01   1.00800           0   0.00000     -0.301140E-02
    2885 5S   139  LEU  C      20   0.510000       12.0110           0   0.00000     -0.301140E-02
    2886 5S   139  LEU  O      70  -0.510000       15.9990           0   0.00000     -0.301140E-02
    2887 5S   140  ASN  N      54  -0.470000       14.0070           0   0.00000     -0.301140E-02
    2888 5S   140  ASN  HN      1   0.310000       1.00800           0   0.00000     -0.301140E-02
    2889 5S   140  ASN  CA     22   0.700000E-01   12.0110           0   0.00000     -0.301140E-02
    2890 5S   140  ASN  HA      6   0.900000E-01   1.00800           0   0.00000     -0.301140E-02
    2891 5S   140  ASN  CB     23  -0.180000       12.0110           0   0.00000     -0.301140E-02
    2892 5S   140  ASN  HB1     3   0.900000E-01   1.00800           0   0.00000     -0.301140E-02
    2893 5S   140  ASN  HB2     3   0.900000E-01   1.00800           0   0.00000     -0.301140E-02
    2894 5S   140  ASN  CG     32   0.550000       12.0110           0   0.00000     -0.301140E-02
    2895 5S   140  ASN  OD1    70  -0.550000       15.9990           0   0.00000     -0.301140E-02
    2896 5S   140  ASN  ND2    55  -0.620000       14.0070           0   0.00000     -0.301140E-02
    2897 5S   140  ASN  HD21    1   0.320000       1.00800           0   0.00000     -0.301140E-02
    2898 5S   140  ASN  HD22    1   0.300000       1.00800           0   0.00000     -0.301140E-02
    2899 5S   140  ASN  C      20   0.510000       12.0110           0   0.00000     -0.301140E-02
    2900 5S   140  ASN  O      70  -0.510000       15.9990           0   0.00000     -0.301140E-02
    2901 5S   141  THR  N      54  -0.470000       14.0070           0   0.00000     -0.301140E-02
    2902 5S   141  THR  HN      1   0.310000       1.00800           0   0.00000     -0.301140E-02
    2903 5S   141  THR  CA     22   0.700000E-01   12.0110           0   0.00000     -0.301140E-02
    2904 5S   141  THR  HA      6   0.900000E-01   1.00800           0   0.00000     -0.301140E-02
    2905 5S   141  THR  CB     22   0.140000       12.0110           0   0.00000     -0.301140E-02
    2906 5S   141  THR  HB      3   0.900000E-01   1.00800           0   0.00000     -0.301140E-02
    2907 5S   141  THR  OG1    73  -0.660000       15.9990           0   0.00000     -0.301140E-02
    2908 5S   141  THR  HG1     1   0.430000       1.00800           0   0.00000     -0.301140E-02
    2909 5S   141  THR  CG2    24  -0.270000       12.0110           0   0.00000     -0.301140E-02
    2910 5S   141  THR  HG21    3   0.900000E-01   1.00800           0   0.00000     -0.301140E-02
    2911 5S   141  THR  HG22    3   0.900000E-01   1.00800           0   0.00000     -0.301140E-02
    2912 5S   141  THR  HG23    3   0.900000E-01   1.00800           0   0.00000     -0.301140E-02
    2913 5S   141  THR  C      20   0.510000       12.0110           0   0.00000     -0.301140E-02
    2914 5S   141  THR  O      70  -0.510000       15.9990           0   0.00000     -0.301140E-02
    2915 5S   142  PRO  N      50  -0.290000       14.0070           0   0.00000     -0.301140E-02
    2916 5S   142  PRO  CD     31    0.00000       12.0110           0   0.00000     -0.301140E-02
    2917 5S   142  PRO  HD1     3   0.900000E-01   1.00800           0   0.00000     -0.301140E-02
    2918 5S   142  PRO  HD2     3   0.900000E-01   1.00800           0   0.00000     -0.301140E-02
    2919 5S   142  PRO  CA     29   0.200000E-01   12.0110           0   0.00000     -0.301140E-02
    2920 5S   142  PRO  HA      6   0.900000E-01   1.00800           0   0.00000     -0.301140E-02
    2921 5S   142  PRO  CB     30  -0.180000       12.0110           0   0.00000     -0.301140E-02
    2922 5S   142  PRO  HB1     3   0.900000E-01   1.00800           0   0.00000     -0.301140E-02
    2923 5S   142  PRO  HB2     3   0.900000E-01   1.00800           0   0.00000     -0.301140E-02
    2924 5S   142  PRO  CG     30  -0.180000       12.0110           0   0.00000     -0.301140E-02
    2925 5S   142  PRO  HG1     3   0.900000E-01   1.00800           0   0.00000     -0.301140E-02
    2926 5S   142  PRO  HG2     3   0.900000E-01   1.00800           0   0.00000     -0.301140E-02
    2927 5S   142  PRO  C      20   0.510000       12.0110           0   0.00000     -0.301140E-02
    2928 5S   142  PRO  O      70  -0.510000       15.9990           0   0.00000     -0.301140E-02
    2929 5S   143  LYS  N      54  -0.470000       14.0070           0   0.00000     -0.301140E-02
    2930 5S   143  LYS  HN      1   0.310000       1.00800           0   0.00000     -0.301140E-02
    2931 5S   143  LYS  CA     22   0.700000E-01   12.0110           0   0.00000     -0.301140E-02
    2932 5S   143  LYS  HA      6   0.900000E-01   1.00800           0   0.00000     -0.301140E-02
    2933 5S   143  LYS  CB     23  -0.180000       12.0110           0   0.00000     -0.301140E-02
    2934 5S   143  LYS  HB1     3   0.900000E-01   1.00800           0   0.00000     -0.301140E-02
    2935 5S   143  LYS  HB2     3   0.900000E-01   1.00800           0   0.00000     -0.301140E-02
    2936 5S   143  LYS  CG     23  -0.180000       12.0110           0   0.00000     -0.301140E-02
    2937 5S   143  LYS  HG1     3   0.900000E-01   1.00800           0   0.00000     -0.301140E-02
    2938 5S   143  LYS  HG2     3   0.900000E-01   1.00800           0   0.00000     -0.301140E-02
    2939 5S   143  LYS  CD     23  -0.180000       12.0110           0   0.00000     -0.301140E-02
    2940 5S   143  LYS  HD1     3   0.900000E-01   1.00800           0   0.00000     -0.301140E-02
    2941 5S   143  LYS  HD2     3   0.900000E-01   1.00800           0   0.00000     -0.301140E-02
    2942 5S   143  LYS  CE     23   0.210000       12.0110           0   0.00000     -0.301140E-02
    2943 5S   143  LYS  HE1     3   0.500000E-01   1.00800           0   0.00000     -0.301140E-02
    2944 5S   143  LYS  HE2     3   0.500000E-01   1.00800           0   0.00000     -0.301140E-02
    2945 5S   143  LYS  NZ     56  -0.300000       14.0070           0   0.00000     -0.301140E-02
    2946 5S   143  LYS  HZ1     2   0.330000       1.00800           0   0.00000     -0.301140E-02
    2947 5S   143  LYS  HZ2     2   0.330000       1.00800           0   0.00000     -0.301140E-02
    2948 5S   143  LYS  HZ3     2   0.330000       1.00800           0   0.00000     -0.301140E-02
    2949 5S   143  LYS  C      20   0.510000       12.0110           0   0.00000     -0.301140E-02
    2950 5S   143  LYS  O      70  -0.510000       15.9990           0   0.00000     -0.301140E-02
    2951 5S   144  ASP  N      54  -0.470000       14.0070           0   0.00000     -0.301140E-02
    2952 5S   144  ASP  HN      1   0.310000       1.00800           0   0.00000     -0.301140E-02
    2953 5S   144  ASP  CA     22   0.700000E-01   12.0110           0   0.00000     -0.301140E-02
    2954 5S   144  ASP  HA      6   0.900000E-01   1.00800           0   0.00000     -0.301140E-02
    2955 5S   144  ASP  CB     23  -0.280000       12.0110           0   0.00000     -0.301140E-02
    2956 5S   144  ASP  HB1     3   0.900000E-01   1.00800           0   0.00000     -0.301140E-02
    2957 5S   144  ASP  HB2     3   0.900000E-01   1.00800           0   0.00000     -0.301140E-02
    2958 5S   144  ASP  CG     32   0.620000       12.0110           0   0.00000     -0.301140E-02
    2959 5S   144  ASP  OD1    72  -0.760000       15.9990           0   0.00000     -0.301140E-02
    2960 5S   144  ASP  OD2    72  -0.760000       15.9990           0   0.00000     -0.301140E-02
    2961 5S   144  ASP  C      20   0.510000       12.0110           0   0.00000     -0.301140E-02
    2962 5S   144  ASP  O      70  -0.510000       15.9990           0   0.00000     -0.301140E-02
    2963 5S   145  HSD  N      54  -0.470000       14.0070           0   0.00000     -0.301140E-02
    2964 5S   145  HSD  HN      1   0.310000       1.00800           0   0.00000     -0.301140E-02
    2965 5S   145  HSD  CA     22   0.700000E-01   12.0110           0   0.00000     -0.301140E-02
    2966 5S   145  HSD  HA      6   0.900000E-01   1.00800           0   0.00000     -0.301140E-02
    2967 5S   145  HSD  CB     23  -0.900000E-01   12.0110           0   0.00000     -0.301140E-02
    2968 5S   145  HSD  HB1     3   0.900000E-01   1.00800           0   0.00000     -0.301140E-02
    2969 5S   145  HSD  HB2     3   0.900000E-01   1.00800           0   0.00000     -0.301140E-02
    2970 5S   145  HSD  ND1    51  -0.360000       14.0070           0   0.00000     -0.301140E-02
    2971 5S   145  HSD  HD1     1   0.320000       1.00800           0   0.00000     -0.301140E-02
    2972 5S   145  HSD  CG     25  -0.500000E-01   12.0110           0   0.00000     -0.301140E-02
    2973 5S   145  HSD  CE1    26   0.250000       12.0110           0   0.00000     -0.301140E-02
    2974 5S   145  HSD  HE1     7   0.130000       1.00800           0   0.00000     -0.301140E-02
    2975 5S   145  HSD  NE2    52  -0.700000       14.0070           0   0.00000     -0.301140E-02
    2976 5S   145  HSD  CD2    25   0.220000       12.0110           0   0.00000     -0.301140E-02
    2977 5S   145  HSD  HD2     9   0.100000       1.00800           0   0.00000     -0.301140E-02
    2978 5S   145  HSD  C      20   0.510000       12.0110           0   0.00000     -0.301140E-02
    2979 5S   145  HSD  O      70  -0.510000       15.9990           0   0.00000     -0.301140E-02
    2980 5S   146  ILE  N      54  -0.470000       14.0070           0   0.00000     -0.301140E-02
    2981 5S   146  ILE  HN      1   0.310000       1.00800           0   0.00000     -0.301140E-02
    2982 5S   146  ILE  CA     22   0.700000E-01   12.0110           0   0.00000     -0.301140E-02
    2983 5S   146  ILE  HA      6   0.900000E-01   1.00800           0   0.00000     -0.301140E-02
    2984 5S   146  ILE  CB     22  -0.900000E-01   12.0110           0   0.00000     -0.301140E-02
    2985 5S   146  ILE  HB      3   0.900000E-01   1.00800           0   0.00000     -0.301140E-02
    2986 5S   146  ILE  CG2    24  -0.270000       12.0110           0   0.00000     -0.301140E-02
    2987 5S   146  ILE  HG21    3   0.900000E-01   1.00800           0   0.00000     -0.301140E-02
    2988 5S   146  ILE  HG22    3   0.900000E-01   1.00800           0   0.00000     -0.301140E-02
    2989 5S   146  ILE  HG23    3   0.900000E-01   1.00800           0   0.00000     -0.301140E-02
    2990 5S   146  ILE  CG1    23  -0.180000       12.0110           0   0.00000     -0.301140E-02
    2991 5S   146  ILE  HG11    3   0.900000E-01   1.00800           0   0.00000     -0.301140E-02
    2992 5S   146  ILE  HG12    3   0.900000E-01   1.00800           0   0.00000     -0.301140E-02
    2993 5S   146  ILE  CD     24  -0.270000       12.0110           0   0.00000     -0.301140E-02
    2994 5S   146  ILE  HD1     3   0.900000E-01   1.00800           0   0.00000     -0.301140E-02
    2995 5S   146  ILE  HD2     3   0.900000E-01   1.00800           0   0.00000     -0.301140E-02
    2996 5S   146  ILE  HD3     3   0.900000E-01   1.00800           0   0.00000     -0.301140E-02
    2997 5S   146  ILE  C      20   0.510000       12.0110           0   0.00000     -0.301140E-02
    2998 5S   146  ILE  O      70  -0.510000       15.9990           0   0.00000     -0.301140E-02
    2999 5S   147  GLY  N      54  -0.470000       14.0070           0   0.00000     -0.301140E-02
    3000 5S   147  GLY  HN      1   0.310000       1.00800           0   0.00000     -0.301140E-02
    3001 5S   147  GLY  CA     23  -0.200000E-01   12.0110           0   0.00000     -0.301140E-02
    3002 5S   147  GLY  HA1     6   0.900000E-01   1.00800           0   0.00000     -0.301140E-02
    3003 5S   147  GLY  HA2     6   0.900000E-01   1.00800           0   0.00000     -0.301140E-02
    3004 5S   147  GLY  C      20   0.510000       12.0110           0   0.00000     -0.301140E-02
    3005 5S   147  GLY  O      70  -0.510000       15.9990           0   0.00000     -0.301140E-02
    3006 5S   148  THR  N      54  -0.470000       14.0070           0   0.00000     -0.301140E-02
    3007 5S   148  THR  HN      1   0.310000       1.00800           0   0.00000     -0.301140E-02
    3008 5S   148  THR  CA     22   0.700000E-01   12.0110           0   0.00000     -0.301140E-02
    3009 5S   148  THR  HA      6   0.900000E-01   1.00800           0   0.00000     -0.301140E-02
    3010 5S   148  THR  CB     22   0.140000       12.0110           0   0.00000     -0.301140E-02
    3011 5S   148  THR  HB      3   0.900000E-01   1.00800           0   0.00000     -0.301140E-02
    3012 5S   148  THR  OG1    73  -0.660000       15.9990           0   0.00000     -0.301140E-02
    3013 5S   148  THR  HG1     1   0.430000       1.00800           0   0.00000     -0.301140E-02
    3014 5S   148  THR  CG2    24  -0.270000       12.0110           0   0.00000     -0.301140E-02
    3015 5S   148  THR  HG21    3   0.900000E-01   1.00800           0   0.00000     -0.301140E-02
    3016 5S   148  THR  HG22    3   0.900000E-01   1.00800           0   0.00000     -0.301140E-02
    3017 5S   148  THR  HG23    3   0.900000E-01   1.00800           0   0.00000     -0.301140E-02
    3018 5S   148  THR  C      20   0.510000       12.0110           0   0.00000     -0.301140E-02
    3019 5S   148  THR  O      70  -0.510000       15.9990           0   0.00000     -0.301140E-02
    3020 5S   149  ARG  N      54  -0.470000       14.0070           0   0.00000     -0.301140E-02
    3021 5S   149  ARG  HN      1   0.310000       1.00800           0   0.00000     -0.301140E-02
    3022 5S   149  ARG  CA     22   0.700000E-01   12.0110           0   0.00000     -0.301140E-02
    3023 5S   149  ARG  HA      6   0.900000E-01   1.00800           0   0.00000     -0.301140E-02
    3024 5S   149  ARG  CB     23  -0.180000       12.0110           0   0.00000     -0.301140E-02
    3025 5S   149  ARG  HB1     3   0.900000E-01   1.00800           0   0.00000     -0.301140E-02
    3026 5S   149  ARG  HB2     3   0.900000E-01   1.00800           0   0.00000     -0.301140E-02
    3027 5S   149  ARG  CG     23  -0.180000       12.0110           0   0.00000     -0.301140E-02
    3028 5S   149  ARG  HG1     3   0.900000E-01   1.00800           0   0.00000     -0.301140E-02
    3029 5S   149  ARG  HG2     3   0.900000E-01   1.00800           0   0.00000     -0.301140E-02
    3030 5S   149  ARG  CD     23   0.200000       12.0110           0   0.00000     -0.301140E-02
    3031 5S   149  ARG  HD1     3   0.900000E-01   1.00800           0   0.00000     -0.301140E-02
    3032 5S   149  ARG  HD2     3   0.900000E-01   1.00800           0   0.00000     -0.301140E-02
    3033 5S   149  ARG  NE     57  -0.700000       14.0070           0   0.00000     -0.301140E-02
    3034 5S   149  ARG  HE      2   0.440000       1.00800           0   0.00000     -0.301140E-02
    3035 5S   149  ARG  CZ     20   0.640000       12.0110           0   0.00000     -0.301140E-02
    3036 5S   149  ARG  NH1    57  -0.800000       14.0070           0   0.00000     -0.301140E-02
    3037 5S   149  ARG  HH11    2   0.460000       1.00800           0   0.00000     -0.301140E-02
    3038 5S   149  ARG  HH12    2   0.460000       1.00800           0   0.00000     -0.301140E-02
    3039 5S   149  ARG  NH2    57  -0.800000       14.0070           0   0.00000     -0.301140E-02
    3040 5S   149  ARG  HH21    2   0.460000       1.00800           0   0.00000     -0.301140E-02
    3041 5S   149  ARG  HH22    2   0.460000       1.00800           0   0.00000     -0.301140E-02
    3042 5S   149  ARG  C      20   0.510000       12.0110           0   0.00000     -0.301140E-02
    3043 5S   149  ARG  O      70  -0.510000       15.9990           0   0.00000     -0.301140E-02
    3044 5S   150  ASN  N      54  -0.470000       14.0070           0   0.00000     -0.301140E-02
    3045 5S   150  ASN  HN      1   0.310000       1.00800           0   0.00000     -0.301140E-02
    3046 5S   150  ASN  CA     22   0.700000E-01   12.0110           0   0.00000     -0.301140E-02
    3047 5S   150  ASN  HA      6   0.900000E-01   1.00800           0   0.00000     -0.301140E-02
    3048 5S   150  ASN  CB     23  -0.180000       12.0110           0   0.00000     -0.301140E-02
    3049 5S   150  ASN  HB1     3   0.900000E-01   1.00800           0   0.00000     -0.301140E-02
    3050 5S   150  ASN  HB2     3   0.900000E-01   1.00800           0   0.00000     -0.301140E-02
    3051 5S   150  ASN  CG     32   0.550000       12.0110           0   0.00000     -0.301140E-02
    3052 5S   150  ASN  OD1    70  -0.550000       15.9990           0   0.00000     -0.301140E-02
    3053 5S   150  ASN  ND2    55  -0.620000       14.0070           0   0.00000     -0.301140E-02
    3054 5S   150  ASN  HD21    1   0.320000       1.00800           0   0.00000     -0.301140E-02
    3055 5S   150  ASN  HD22    1   0.300000       1.00800           0   0.00000     -0.301140E-02
    3056 5S   150  ASN  C      20   0.510000       12.0110           0   0.00000     -0.301140E-02
    3057 5S   150  ASN  O      70  -0.510000       15.9990           0   0.00000     -0.301140E-02
    3058 5S   151  PRO  N      50  -0.290000       14.0070           0   0.00000     -0.301140E-02
    3059 5S   151  PRO  CD     31    0.00000       12.0110           0   0.00000     -0.301140E-02
    3060 5S   151  PRO  HD1     3   0.900000E-01   1.00800           0   0.00000     -0.301140E-02
    3061 5S   151  PRO  HD2     3   0.900000E-01   1.00800           0   0.00000     -0.301140E-02
    3062 5S   151  PRO  CA     29   0.200000E-01   12.0110           0   0.00000     -0.301140E-02
    3063 5S   151  PRO  HA      6   0.900000E-01   1.00800           0   0.00000     -0.301140E-02
    3064 5S   151  PRO  CB     30  -0.180000       12.0110           0   0.00000     -0.301140E-02
    3065 5S   151  PRO  HB1     3   0.900000E-01   1.00800           0   0.00000     -0.301140E-02
    3066 5S   151  PRO  HB2     3   0.900000E-01   1.00800           0   0.00000     -0.301140E-02
    3067 5S   151  PRO  CG     30  -0.180000       12.0110           0   0.00000     -0.301140E-02
    3068 5S   151  PRO  HG1     3   0.900000E-01   1.00800           0   0.00000     -0.301140E-02
    3069 5S   151  PRO  HG2     3   0.900000E-01   1.00800           0   0.00000     -0.301140E-02
    3070 5S   151  PRO  C      20   0.510000       12.0110           0   0.00000     -0.301140E-02
    3071 5S   151  PRO  O      70  -0.510000       15.9990           0   0.00000     -0.301140E-02
    3072 5S   152  ALA  N      54  -0.470000       14.0070           0   0.00000     -0.301140E-02
    3073 5S   152  ALA  HN      1   0.310000       1.00800           0   0.00000     -0.301140E-02
    3074 5S   152  ALA  CA     22   0.700000E-01   12.0110           0   0.00000     -0.301140E-02
    3075 5S   152  ALA  HA      6   0.900000E-01   1.00800           0   0.00000     -0.301140E-02
    3076 5S   152  ALA  CB     24  -0.270000       12.0110           0   0.00000     -0.301140E-02
    3077 5S   152  ALA  HB1     3   0.900000E-01   1.00800           0   0.00000     -0.301140E-02
    3078 5S   152  ALA  HB2     3   0.900000E-01   1.00800           0   0.00000     -0.301140E-02
    3079 5S   152  ALA  HB3     3   0.900000E-01   1.00800           0   0.00000     -0.301140E-02
    3080 5S   152  ALA  C      20   0.510000       12.0110           0   0.00000     -0.301140E-02
    3081 5S   152  ALA  O      70  -0.510000       15.9990           0   0.00000     -0.301140E-02
    3082 5S   153  ASN  N      54  -0.470000       14.0070           0   0.00000     -0.301140E-02
    3083 5S   153  ASN  HN      1   0.310000       1.00800           0   0.00000     -0.301140E-02
    3084 5S   153  ASN  CA     22   0.700000E-01   12.0110           0   0.00000     -0.301140E-02
    3085 5S   153  ASN  HA      6   0.900000E-01   1.00800           0   0.00000     -0.301140E-02
    3086 5S   153  ASN  CB     23  -0.180000       12.0110           0   0.00000     -0.301140E-02
    3087 5S   153  ASN  HB1     3   0.900000E-01   1.00800           0   0.00000     -0.301140E-02
    3088 5S   153  ASN  HB2     3   0.900000E-01   1.00800           0   0.00000     -0.301140E-02
    3089 5S   153  ASN  CG     32   0.550000       12.0110           0   0.00000     -0.301140E-02
    3090 5S   153  ASN  OD1    70  -0.550000       15.9990           0   0.00000     -0.301140E-02
    3091 5S   153  ASN  ND2    55  -0.620000       14.0070           0   0.00000     -0.301140E-02
    3092 5S   153  ASN  HD21    1   0.320000       1.00800           0   0.00000     -0.301140E-02
    3093 5S   153  ASN  HD22    1   0.300000       1.00800           0   0.00000     -0.301140E-02
    3094 5S   153  ASN  C      20   0.510000       12.0110           0   0.00000     -0.301140E-02
    3095 5S   153  ASN  O      70  -0.510000       15.9990           0   0.00000     -0.301140E-02
    3096 5S   154  ASN  N      54  -0.470000       14.0070           0   0.00000     -0.301140E-02
    3097 5S   154  ASN  HN      1   0.310000       1.00800           0   0.00000     -0.301140E-02
    3098 5S   154  ASN  CA     22   0.700000E-01   12.0110           0   0.00000     -0.301140E-02
    3099 5S   154  ASN  HA      6   0.900000E-01   1.00800           0   0.00000     -0.301140E-02
    3100 5S   154  ASN  CB     23  -0.180000       12.0110           0   0.00000     -0.301140E-02
    3101 5S   154  ASN  HB1     3   0.900000E-01   1.00800           0   0.00000     -0.301140E-02
    3102 5S   154  ASN  HB2     3   0.900000E-01   1.00800           0   0.00000     -0.301140E-02
    3103 5S   154  ASN  CG     32   0.550000       12.0110           0   0.00000     -0.301140E-02
    3104 5S   154  ASN  OD1    70  -0.550000       15.9990           0   0.00000     -0.301140E-02
    3105 5S   154  ASN  ND2    55  -0.620000       14.0070           0   0.00000     -0.301140E-02
    3106 5S   154  ASN  HD21    1   0.320000       1.00800           0   0.00000     -0.301140E-02
    3107 5S   154  ASN  HD22    1   0.300000       1.00800           0   0.00000     -0.301140E-02
    3108 5S   154  ASN  C      20   0.510000       12.0110           0   0.00000     -0.301140E-02
    3109 5S   154  ASN  O      70  -0.510000       15.9990           0   0.00000     -0.301140E-02
    3110 5S   155  ALA  N      54  -0.470000       14.0070           0   0.00000     -0.301140E-02
    3111 5S   155  ALA  HN      1   0.310000       1.00800           0   0.00000     -0.301140E-02
    3112 5S   155  ALA  CA     22   0.700000E-01   12.0110           0   0.00000     -0.301140E-02
    3113 5S   155  ALA  HA      6   0.900000E-01   1.00800           0   0.00000     -0.301140E-02
    3114 5S   155  ALA  CB     24  -0.270000       12.0110           0   0.00000     -0.301140E-02
    3115 5S   155  ALA  HB1     3   0.900000E-01   1.00800           0   0.00000     -0.301140E-02
    3116 5S   155  ALA  HB2     3   0.900000E-01   1.00800           0   0.00000     -0.301140E-02
    3117 5S   155  ALA  HB3     3   0.900000E-01   1.00800           0   0.00000     -0.301140E-02
    3118 5S   155  ALA  C      20   0.510000       12.0110           0   0.00000     -0.301140E-02
    3119 5S   155  ALA  O      70  -0.510000       15.9990           0   0.00000     -0.301140E-02
    3120 5S   156  ALA  N      54  -0.470000       14.0070           0   0.00000     -0.301140E-02
    3121 5S   156  ALA  HN      1   0.310000       1.00800           0   0.00000     -0.301140E-02
    3122 5S   156  ALA  CA     22   0.700000E-01   12.0110           0   0.00000     -0.301140E-02
    3123 5S   156  ALA  HA      6   0.900000E-01   1.00800           0   0.00000     -0.301140E-02
    3124 5S   156  ALA  CB     24  -0.270000       12.0110           0   0.00000     -0.301140E-02
    3125 5S   156  ALA  HB1     3   0.900000E-01   1.00800           0   0.00000     -0.301140E-02
    3126 5S   156  ALA  HB2     3   0.900000E-01   1.00800           0   0.00000     -0.301140E-02
    3127 5S   156  ALA  HB3     3   0.900000E-01   1.00800           0   0.00000     -0.301140E-02
    3128 5S   156  ALA  C      20   0.510000       12.0110           0   0.00000     -0.301140E-02
    3129 5S   156  ALA  O      70  -0.510000       15.9990           0   0.00000     -0.301140E-02
    3130 5S   157  ILE  N      54  -0.470000       14.0070           0   0.00000     -0.301140E-02
    3131 5S   157  ILE  HN      1   0.310000       1.00800           0   0.00000     -0.301140E-02
    3132 5S   157  ILE  CA     22   0.700000E-01   12.0110           0   0.00000     -0.301140E-02
    3133 5S   157  ILE  HA      6   0.900000E-01   1.00800           0   0.00000     -0.301140E-02
    3134 5S   157  ILE  CB     22  -0.900000E-01   12.0110           0   0.00000     -0.301140E-02
    3135 5S   157  ILE  HB      3   0.900000E-01   1.00800           0   0.00000     -0.301140E-02
    3136 5S   157  ILE  CG2    24  -0.270000       12.0110           0   0.00000     -0.301140E-02
    3137 5S   157  ILE  HG21    3   0.900000E-01   1.00800           0   0.00000     -0.301140E-02
    3138 5S   157  ILE  HG22    3   0.900000E-01   1.00800           0   0.00000     -0.301140E-02
    3139 5S   157  ILE  HG23    3   0.900000E-01   1.00800           0   0.00000     -0.301140E-02
    3140 5S   157  ILE  CG1    23  -0.180000       12.0110           0   0.00000     -0.301140E-02
    3141 5S   157  ILE  HG11    3   0.900000E-01   1.00800           0   0.00000     -0.301140E-02
    3142 5S   157  ILE  HG12    3   0.900000E-01   1.00800           0   0.00000     -0.301140E-02
    3143 5S   157  ILE  CD     24  -0.270000       12.0110           0   0.00000     -0.301140E-02
    3144 5S   157  ILE  HD1     3   0.900000E-01   1.00800           0   0.00000     -0.301140E-02
    3145 5S   157  ILE  HD2     3   0.900000E-01   1.00800           0   0.00000     -0.301140E-02
    3146 5S   157  ILE  HD3     3   0.900000E-01   1.00800           0   0.00000     -0.301140E-02
    3147 5S   157  ILE  C      20   0.510000       12.0110           0   0.00000     -0.301140E-02
    3148 5S   157  ILE  O      70  -0.510000       15.9990           0   0.00000     -0.301140E-02
    3149 5S   158  VAL  N      54  -0.470000       14.0070           0   0.00000     -0.301140E-02
    3150 5S   158  VAL  HN      1   0.310000       1.00800           0   0.00000     -0.301140E-02
    3151 5S   158  VAL  CA     22   0.700000E-01   12.0110           0   0.00000     -0.301140E-02
    3152 5S   158  VAL  HA      6   0.900000E-01   1.00800           0   0.00000     -0.301140E-02
    3153 5S   158  VAL  CB     22  -0.900000E-01   12.0110           0   0.00000     -0.301140E-02
    3154 5S   158  VAL  HB      3   0.900000E-01   1.00800           0   0.00000     -0.301140E-02
    3155 5S   158  VAL  CG1    24  -0.270000       12.0110           0   0.00000     -0.301140E-02
    3156 5S   158  VAL  HG11    3   0.900000E-01   1.00800           0   0.00000     -0.301140E-02
    3157 5S   158  VAL  HG12    3   0.900000E-01   1.00800           0   0.00000     -0.301140E-02
    3158 5S   158  VAL  HG13    3   0.900000E-01   1.00800           0   0.00000     -0.301140E-02
    3159 5S   158  VAL  CG2    24  -0.270000       12.0110           0   0.00000     -0.301140E-02
    3160 5S   158  VAL  HG21    3   0.900000E-01   1.00800           0   0.00000     -0.301140E-02
    3161 5S   158  VAL  HG22    3   0.900000E-01   1.00800           0   0.00000     -0.301140E-02
    3162 5S   158  VAL  HG23    3   0.900000E-01   1.00800           0   0.00000     -0.301140E-02
    3163 5S   158  VAL  C      20   0.510000       12.0110           0   0.00000     -0.301140E-02
    3164 5S   158  VAL  O      70  -0.510000       15.9990           0   0.00000     -0.301140E-02
    3165 5S   159  LEU  N      54  -0.470000       14.0070           0   0.00000     -0.301140E-02
    3166 5S   159  LEU  HN      1   0.310000       1.00800           0   0.00000     -0.301140E-02
    3167 5S   159  LEU  CA     22   0.700000E-01   12.0110           0   0.00000     -0.301140E-02
    3168 5S   159  LEU  HA      6   0.900000E-01   1.00800           0   0.00000     -0.301140E-02
    3169 5S   159  LEU  CB     23  -0.180000       12.0110           0   0.00000     -0.301140E-02
    3170 5S   159  LEU  HB1     3   0.900000E-01   1.00800           0   0.00000     -0.301140E-02
    3171 5S   159  LEU  HB2     3   0.900000E-01   1.00800           0   0.00000     -0.301140E-02
    3172 5S   159  LEU  CG     22  -0.900000E-01   12.0110           0   0.00000     -0.301140E-02
    3173 5S   159  LEU  HG      3   0.900000E-01   1.00800           0   0.00000     -0.301140E-02
    3174 5S   159  LEU  CD1    24  -0.270000       12.0110           0   0.00000     -0.301140E-02
    3175 5S   159  LEU  HD11    3   0.900000E-01   1.00800           0   0.00000     -0.301140E-02
    3176 5S   159  LEU  HD12    3   0.900000E-01   1.00800           0   0.00000     -0.301140E-02
    3177 5S   159  LEU  HD13    3   0.900000E-01   1.00800           0   0.00000     -0.301140E-02
    3178 5S   159  LEU  CD2    24  -0.270000       12.0110           0   0.00000     -0.301140E-02
    3179 5S   159  LEU  HD21    3   0.900000E-01   1.00800           0   0.00000     -0.301140E-02
    3180 5S   159  LEU  HD22    3   0.900000E-01   1.00800           0   0.00000     -0.301140E-02
    3181 5S   159  LEU  HD23    3   0.900000E-01   1.00800           0   0.00000     -0.301140E-02
    3182 5S   159  LEU  C      20   0.510000       12.0110           0   0.00000     -0.301140E-02
    3183 5S   159  LEU  O      70  -0.510000       15.9990           0   0.00000     -0.301140E-02
    3184 5S   160  GLN  N      54  -0.470000       14.0070           0   0.00000     -0.301140E-02
    3185 5S   160  GLN  HN      1   0.310000       1.00800           0   0.00000     -0.301140E-02
    3186 5S   160  GLN  CA     22   0.700000E-01   12.0110           0   0.00000     -0.301140E-02
    3187 5S   160  GLN  HA      6   0.900000E-01   1.00800           0   0.00000     -0.301140E-02
    3188 5S   160  GLN  CB     23  -0.180000       12.0110           0   0.00000     -0.301140E-02
    3189 5S   160  GLN  HB1     3   0.900000E-01   1.00800           0   0.00000     -0.301140E-02
    3190 5S   160  GLN  HB2     3   0.900000E-01   1.00800           0   0.00000     -0.301140E-02
    3191 5S   160  GLN  CG     23  -0.180000       12.0110           0   0.00000     -0.301140E-02
    3192 5S   160  GLN  HG1     3   0.900000E-01   1.00800           0   0.00000     -0.301140E-02
    3193 5S   160  GLN  HG2     3   0.900000E-01   1.00800           0   0.00000     -0.301140E-02
    3194 5S   160  GLN  CD     32   0.550000       12.0110           0   0.00000     -0.301140E-02
    3195 5S   160  GLN  OE1    70  -0.550000       15.9990           0   0.00000     -0.301140E-02
    3196 5S   160  GLN  NE2    55  -0.620000       14.0070           0   0.00000     -0.301140E-02
    3197 5S   160  GLN  HE21    1   0.320000       1.00800           0   0.00000     -0.301140E-02
    3198 5S   160  GLN  HE22    1   0.300000       1.00800           0   0.00000     -0.301140E-02
    3199 5S   160  GLN  C      20   0.510000       12.0110           0   0.00000     -0.301140E-02
    3200 5S   160  GLN  O      70  -0.510000       15.9990           0   0.00000     -0.301140E-02
    3201 5S   161  LEU  N      54  -0.470000       14.0070           0   0.00000     -0.301140E-02
    3202 5S   161  LEU  HN      1   0.310000       1.00800           0   0.00000     -0.301140E-02
    3203 5S   161  LEU  CA     22   0.700000E-01   12.0110           0   0.00000     -0.301140E-02
    3204 5S   161  LEU  HA      6   0.900000E-01   1.00800           0   0.00000     -0.301140E-02
    3205 5S   161  LEU  CB     23  -0.180000       12.0110           0   0.00000     -0.301140E-02
    3206 5S   161  LEU  HB1     3   0.900000E-01   1.00800           0   0.00000     -0.301140E-02
    3207 5S   161  LEU  HB2     3   0.900000E-01   1.00800           0   0.00000     -0.301140E-02
    3208 5S   161  LEU  CG     22  -0.900000E-01   12.0110           0   0.00000     -0.301140E-02
    3209 5S   161  LEU  HG      3   0.900000E-01   1.00800           0   0.00000     -0.301140E-02
    3210 5S   161  LEU  CD1    24  -0.270000       12.0110           0   0.00000     -0.301140E-02
    3211 5S   161  LEU  HD11    3   0.900000E-01   1.00800           0   0.00000     -0.301140E-02
    3212 5S   161  LEU  HD12    3   0.900000E-01   1.00800           0   0.00000     -0.301140E-02
    3213 5S   161  LEU  HD13    3   0.900000E-01   1.00800           0   0.00000     -0.301140E-02
    3214 5S   161  LEU  CD2    24  -0.270000       12.0110           0   0.00000     -0.301140E-02
    3215 5S   161  LEU  HD21    3   0.900000E-01   1.00800           0   0.00000     -0.301140E-02
    3216 5S   161  LEU  HD22    3   0.900000E-01   1.00800           0   0.00000     -0.301140E-02
    3217 5S   161  LEU  HD23    3   0.900000E-01   1.00800           0   0.00000     -0.301140E-02
    3218 5S   161  LEU  C      20   0.510000       12.0110           0   0.00000     -0.301140E-02
    3219 5S   161  LEU  O      70  -0.510000       15.9990           0   0.00000     -0.301140E-02
    3220 5S   162  PRO  N      50  -0.290000       14.0070           0   0.00000     -0.301140E-02
    3221 5S   162  PRO  CD     31    0.00000       12.0110           0   0.00000     -0.301140E-02
    3222 5S   162  PRO  HD1     3   0.900000E-01   1.00800           0   0.00000     -0.301140E-02
    3223 5S   162  PRO  HD2     3   0.900000E-01   1.00800           0   0.00000     -0.301140E-02
    3224 5S   162  PRO  CA     29   0.200000E-01   12.0110           0   0.00000     -0.301140E-02
    3225 5S   162  PRO  HA      6   0.900000E-01   1.00800           0   0.00000     -0.301140E-02
    3226 5S   162  PRO  CB     30  -0.180000       12.0110           0   0.00000     -0.301140E-02
    3227 5S   162  PRO  HB1     3   0.900000E-01   1.00800           0   0.00000     -0.301140E-02
    3228 5S   162  PRO  HB2     3   0.900000E-01   1.00800           0   0.00000     -0.301140E-02
    3229 5S   162  PRO  CG     30  -0.180000       12.0110           0   0.00000     -0.301140E-02
    3230 5S   162  PRO  HG1     3   0.900000E-01   1.00800           0   0.00000     -0.301140E-02
    3231 5S   162  PRO  HG2     3   0.900000E-01   1.00800           0   0.00000     -0.301140E-02
    3232 5S   162  PRO  C      20   0.510000       12.0110           0   0.00000     -0.301140E-02
    3233 5S   162  PRO  O      70  -0.510000       15.9990           0   0.00000     -0.301140E-02
    3234 5S   163  GLN  N      54  -0.470000       14.0070           0   0.00000     -0.301140E-02
    3235 5S   163  GLN  HN      1   0.310000       1.00800           0   0.00000     -0.301140E-02
    3236 5S   163  GLN  CA     22   0.700000E-01   12.0110           0   0.00000     -0.301140E-02
    3237 5S   163  GLN  HA      6   0.900000E-01   1.00800           0   0.00000     -0.301140E-02
    3238 5S   163  GLN  CB     23  -0.180000       12.0110           0   0.00000     -0.301140E-02
    3239 5S   163  GLN  HB1     3   0.900000E-01   1.00800           0   0.00000     -0.301140E-02
    3240 5S   163  GLN  HB2     3   0.900000E-01   1.00800           0   0.00000     -0.301140E-02
    3241 5S   163  GLN  CG     23  -0.180000       12.0110           0   0.00000     -0.301140E-02
    3242 5S   163  GLN  HG1     3   0.900000E-01   1.00800           0   0.00000     -0.301140E-02
    3243 5S   163  GLN  HG2     3   0.900000E-01   1.00800           0   0.00000     -0.301140E-02
    3244 5S   163  GLN  CD     32   0.550000       12.0110           0   0.00000     -0.301140E-02
    3245 5S   163  GLN  OE1    70  -0.550000       15.9990           0   0.00000     -0.301140E-02
    3246 5S   163  GLN  NE2    55  -0.620000       14.0070           0   0.00000     -0.301140E-02
    3247 5S   163  GLN  HE21    1   0.320000       1.00800           0   0.00000     -0.301140E-02
    3248 5S   163  GLN  HE22    1   0.300000       1.00800           0   0.00000     -0.301140E-02
    3249 5S   163  GLN  C      20   0.510000       12.0110           0   0.00000     -0.301140E-02
    3250 5S   163  GLN  O      70  -0.510000       15.9990           0   0.00000     -0.301140E-02
    3251 5S   164  GLY  N      54  -0.470000       14.0070           0   0.00000     -0.301140E-02
    3252 5S   164  GLY  HN      1   0.310000       1.00800           0   0.00000     -0.301140E-02
    3253 5S   164  GLY  CA     23  -0.200000E-01   12.0110           0   0.00000     -0.301140E-02
    3254 5S   164  GLY  HA1     6   0.900000E-01   1.00800           0   0.00000     -0.301140E-02
    3255 5S   164  GLY  HA2     6   0.900000E-01   1.00800           0   0.00000     -0.301140E-02
    3256 5S   164  GLY  C      20   0.510000       12.0110           0   0.00000     -0.301140E-02
    3257 5S   164  GLY  O      70  -0.510000       15.9990           0   0.00000     -0.301140E-02
    3258 5S   165  THR  N      54  -0.470000       14.0070           0   0.00000     -0.301140E-02
    3259 5S   165  THR  HN      1   0.310000       1.00800           0   0.00000     -0.301140E-02
    3260 5S   165  THR  CA     22   0.700000E-01   12.0110           0   0.00000     -0.301140E-02
    3261 5S   165  THR  HA      6   0.900000E-01   1.00800           0   0.00000     -0.301140E-02
    3262 5S   165  THR  CB     22   0.140000       12.0110           0   0.00000     -0.301140E-02
    3263 5S   165  THR  HB      3   0.900000E-01   1.00800           0   0.00000     -0.301140E-02
    3264 5S   165  THR  OG1    73  -0.660000       15.9990           0   0.00000     -0.301140E-02
    3265 5S   165  THR  HG1     1   0.430000       1.00800           0   0.00000     -0.301140E-02
    3266 5S   165  THR  CG2    24  -0.270000       12.0110           0   0.00000     -0.301140E-02
    3267 5S   165  THR  HG21    3   0.900000E-01   1.00800           0   0.00000     -0.301140E-02
    3268 5S   165  THR  HG22    3   0.900000E-01   1.00800           0   0.00000     -0.301140E-02
    3269 5S   165  THR  HG23    3   0.900000E-01   1.00800           0   0.00000     -0.301140E-02
    3270 5S   165  THR  C      20   0.510000       12.0110           0   0.00000     -0.301140E-02
    3271 5S   165  THR  O      70  -0.510000       15.9990           0   0.00000     -0.301140E-02
    3272 5S   166  THR  N      54  -0.470000       14.0070           0   0.00000     -0.301140E-02
    3273 5S   166  THR  HN      1   0.310000       1.00800           0   0.00000     -0.301140E-02
    3274 5S   166  THR  CA     22   0.700000E-01   12.0110           0   0.00000     -0.301140E-02
    3275 5S   166  THR  HA      6   0.900000E-01   1.00800           0   0.00000     -0.301140E-02
    3276 5S   166  THR  CB     22   0.140000       12.0110           0   0.00000     -0.301140E-02
    3277 5S   166  THR  HB      3   0.900000E-01   1.00800           0   0.00000     -0.301140E-02
    3278 5S   166  THR  OG1    73  -0.660000       15.9990           0   0.00000     -0.301140E-02
    3279 5S   166  THR  HG1     1   0.430000       1.00800           0   0.00000     -0.301140E-02
    3280 5S   166  THR  CG2    24  -0.270000       12.0110           0   0.00000     -0.301140E-02
    3281 5S   166  THR  HG21    3   0.900000E-01   1.00800           0   0.00000     -0.301140E-02
    3282 5S   166  THR  HG22    3   0.900000E-01   1.00800           0   0.00000     -0.301140E-02
    3283 5S   166  THR  HG23    3   0.900000E-01   1.00800           0   0.00000     -0.301140E-02
    3284 5S   166  THR  C      20   0.510000       12.0110           0   0.00000     -0.301140E-02
    3285 5S   166  THR  O      70  -0.510000       15.9990           0   0.00000     -0.301140E-02
    3286 5S   167  LEU  N      54  -0.470000       14.0070           0   0.00000     -0.301140E-02
    3287 5S   167  LEU  HN      1   0.310000       1.00800           0   0.00000     -0.301140E-02
    3288 5S   167  LEU  CA     22   0.700000E-01   12.0110           0   0.00000     -0.301140E-02
    3289 5S   167  LEU  HA      6   0.900000E-01   1.00800           0   0.00000     -0.301140E-02
    3290 5S   167  LEU  CB     23  -0.180000       12.0110           0   0.00000     -0.301140E-02
    3291 5S   167  LEU  HB1     3   0.900000E-01   1.00800           0   0.00000     -0.301140E-02
    3292 5S   167  LEU  HB2     3   0.900000E-01   1.00800           0   0.00000     -0.301140E-02
    3293 5S   167  LEU  CG     22  -0.900000E-01   12.0110           0   0.00000     -0.301140E-02
    3294 5S   167  LEU  HG      3   0.900000E-01   1.00800           0   0.00000     -0.301140E-02
    3295 5S   167  LEU  CD1    24  -0.270000       12.0110           0   0.00000     -0.301140E-02
    3296 5S   167  LEU  HD11    3   0.900000E-01   1.00800           0   0.00000     -0.301140E-02
    3297 5S   167  LEU  HD12    3   0.900000E-01   1.00800           0   0.00000     -0.301140E-02
    3298 5S   167  LEU  HD13    3   0.900000E-01   1.00800           0   0.00000     -0.301140E-02
    3299 5S   167  LEU  CD2    24  -0.270000       12.0110           0   0.00000     -0.301140E-02
    3300 5S   167  LEU  HD21    3   0.900000E-01   1.00800           0   0.00000     -0.301140E-02
    3301 5S   167  LEU  HD22    3   0.900000E-01   1.00800           0   0.00000     -0.301140E-02
    3302 5S   167  LEU  HD23    3   0.900000E-01   1.00800           0   0.00000     -0.301140E-02
    3303 5S   167  LEU  C      20   0.510000       12.0110           0   0.00000     -0.301140E-02
    3304 5S   167  LEU  O      70  -0.510000       15.9990           0   0.00000     -0.301140E-02
    3305 5S   168  PRO  N      50  -0.290000       14.0070           0   0.00000     -0.301140E-02
    3306 5S   168  PRO  CD     31    0.00000       12.0110           0   0.00000     -0.301140E-02
    3307 5S   168  PRO  HD1     3   0.900000E-01   1.00800           0   0.00000     -0.301140E-02
    3308 5S   168  PRO  HD2     3   0.900000E-01   1.00800           0   0.00000     -0.301140E-02
    3309 5S   168  PRO  CA     29   0.200000E-01   12.0110           0   0.00000     -0.301140E-02
    3310 5S   168  PRO  HA      6   0.900000E-01   1.00800           0   0.00000     -0.301140E-02
    3311 5S   168  PRO  CB     30  -0.180000       12.0110           0   0.00000     -0.301140E-02
    3312 5S   168  PRO  HB1     3   0.900000E-01   1.00800           0   0.00000     -0.301140E-02
    3313 5S   168  PRO  HB2     3   0.900000E-01   1.00800           0   0.00000     -0.301140E-02
    3314 5S   168  PRO  CG     30  -0.180000       12.0110           0   0.00000     -0.301140E-02
    3315 5S   168  PRO  HG1     3   0.900000E-01   1.00800           0   0.00000     -0.301140E-02
    3316 5S   168  PRO  HG2     3   0.900000E-01   1.00800           0   0.00000     -0.301140E-02
    3317 5S   168  PRO  C      20   0.510000       12.0110           0   0.00000     -0.301140E-02
    3318 5S   168  PRO  O      70  -0.510000       15.9990           0   0.00000     -0.301140E-02
    3319 5S   169  LYS  N      54  -0.470000       14.0070           0   0.00000     -0.301140E-02
    3320 5S   169  LYS  HN      1   0.310000       1.00800           0   0.00000     -0.301140E-02
    3321 5S   169  LYS  CA     22   0.700000E-01   12.0110           0   0.00000     -0.301140E-02
    3322 5S   169  LYS  HA      6   0.900000E-01   1.00800           0   0.00000     -0.301140E-02
    3323 5S   169  LYS  CB     23  -0.180000       12.0110           0   0.00000     -0.301140E-02
    3324 5S   169  LYS  HB1     3   0.900000E-01   1.00800           0   0.00000     -0.301140E-02
    3325 5S   169  LYS  HB2     3   0.900000E-01   1.00800           0   0.00000     -0.301140E-02
    3326 5S   169  LYS  CG     23  -0.180000       12.0110           0   0.00000     -0.301140E-02
    3327 5S   169  LYS  HG1     3   0.900000E-01   1.00800           0   0.00000     -0.301140E-02
    3328 5S   169  LYS  HG2     3   0.900000E-01   1.00800           0   0.00000     -0.301140E-02
    3329 5S   169  LYS  CD     23  -0.180000       12.0110           0   0.00000     -0.301140E-02
    3330 5S   169  LYS  HD1     3   0.900000E-01   1.00800           0   0.00000     -0.301140E-02
    3331 5S   169  LYS  HD2     3   0.900000E-01   1.00800           0   0.00000     -0.301140E-02
    3332 5S   169  LYS  CE     23   0.210000       12.0110           0   0.00000     -0.301140E-02
    3333 5S   169  LYS  HE1     3   0.500000E-01   1.00800           0   0.00000     -0.301140E-02
    3334 5S   169  LYS  HE2     3   0.500000E-01   1.00800           0   0.00000     -0.301140E-02
    3335 5S   169  LYS  NZ     56  -0.300000       14.0070           0   0.00000     -0.301140E-02
    3336 5S   169  LYS  HZ1     2   0.330000       1.00800           0   0.00000     -0.301140E-02
    3337 5S   169  LYS  HZ2     2   0.330000       1.00800           0   0.00000     -0.301140E-02
    3338 5S   169  LYS  HZ3     2   0.330000       1.00800           0   0.00000     -0.301140E-02
    3339 5S   169  LYS  C      20   0.510000       12.0110           0   0.00000     -0.301140E-02
    3340 5S   169  LYS  O      70  -0.510000       15.9990           0   0.00000     -0.301140E-02
    3341 5S   170  GLY  N      54  -0.470000       14.0070           0   0.00000     -0.301140E-02
    3342 5S   170  GLY  HN      1   0.310000       1.00800           0   0.00000     -0.301140E-02
    3343 5S   170  GLY  CA     23  -0.200000E-01   12.0110           0   0.00000     -0.301140E-02
    3344 5S   170  GLY  HA1     6   0.900000E-01   1.00800           0   0.00000     -0.301140E-02
    3345 5S   170  GLY  HA2     6   0.900000E-01   1.00800           0   0.00000     -0.301140E-02
    3346 5S   170  GLY  C      20   0.510000       12.0110           0   0.00000     -0.301140E-02
    3347 5S   170  GLY  O      70  -0.510000       15.9990           0   0.00000     -0.301140E-02
    3348 5S   171  PHE  N      54  -0.470000       14.0070           0   0.00000     -0.301140E-02
    3349 5S   171  PHE  HN      1   0.310000       1.00800           0   0.00000     -0.301140E-02
    3350 5S   171  PHE  CA     22   0.700000E-01   12.0110           0   0.00000     -0.301140E-02
    3351 5S   171  PHE  HA      6   0.900000E-01   1.00800           0   0.00000     -0.301140E-02
    3352 5S   171  PHE  CB     23  -0.180000       12.0110           0   0.00000     -0.301140E-02
    3353 5S   171  PHE  HB1     3   0.900000E-01   1.00800           0   0.00000     -0.301140E-02
    3354 5S   171  PHE  HB2     3   0.900000E-01   1.00800           0   0.00000     -0.301140E-02
    3355 5S   171  PHE  CG     21    0.00000       12.0110           0   0.00000     -0.301140E-02
    3356 5S   171  PHE  CD1    21  -0.115000       12.0110           0   0.00000     -0.301140E-02
    3357 5S   171  PHE  HD1     5   0.115000       1.00800           0   0.00000     -0.301140E-02
    3358 5S   171  PHE  CE1    21  -0.115000       12.0110           0   0.00000     -0.301140E-02
    3359 5S   171  PHE  HE1     5   0.115000       1.00800           0   0.00000     -0.301140E-02
    3360 5S   171  PHE  CZ     21  -0.115000       12.0110           0   0.00000     -0.301140E-02
    3361 5S   171  PHE  HZ      5   0.115000       1.00800           0   0.00000     -0.301140E-02
    3362 5S   171  PHE  CD2    21  -0.115000       12.0110           0   0.00000     -0.301140E-02
    3363 5S   171  PHE  HD2     5   0.115000       1.00800           0   0.00000     -0.301140E-02
    3364 5S   171  PHE  CE2    21  -0.115000       12.0110           0   0.00000     -0.301140E-02
    3365 5S   171  PHE  HE2     5   0.115000       1.00800           0   0.00000     -0.301140E-02
    3366 5S   171  PHE  C      20   0.510000       12.0110           0   0.00000     -0.301140E-02
    3367 5S   171  PHE  O      70  -0.510000       15.9990           0   0.00000     -0.301140E-02
    3368 5S   172  TYR  N      54  -0.470000       14.0070           0   0.00000     -0.301140E-02
    3369 5S   172  TYR  HN      1   0.310000       1.00800           0   0.00000     -0.301140E-02
    3370 5S   172  TYR  CA     22   0.700000E-01   12.0110           0   0.00000     -0.301140E-02
    3371 5S   172  TYR  HA      6   0.900000E-01   1.00800           0   0.00000     -0.301140E-02
    3372 5S   172  TYR  CB     23  -0.180000       12.0110           0   0.00000     -0.301140E-02
    3373 5S   172  TYR  HB1     3   0.900000E-01   1.00800           0   0.00000     -0.301140E-02
    3374 5S   172  TYR  HB2     3   0.900000E-01   1.00800           0   0.00000     -0.301140E-02
    3375 5S   172  TYR  CG     21    0.00000       12.0110           0   0.00000     -0.301140E-02
    3376 5S   172  TYR  CD1    21  -0.115000       12.0110           0   0.00000     -0.301140E-02
    3377 5S   172  TYR  HD1     5   0.115000       1.00800           0   0.00000     -0.301140E-02
    3378 5S   172  TYR  CE1    21  -0.115000       12.0110           0   0.00000     -0.301140E-02
    3379 5S   172  TYR  HE1     5   0.115000       1.00800           0   0.00000     -0.301140E-02
    3380 5S   172  TYR  CZ     21   0.110000       12.0110           0   0.00000     -0.301140E-02
    3381 5S   172  TYR  OH     73  -0.540000       15.9990           0   0.00000     -0.301140E-02
    3382 5S   172  TYR  HH      1   0.430000       1.00800           0   0.00000     -0.301140E-02
    3383 5S   172  TYR  CD2    21  -0.115000       12.0110           0   0.00000     -0.301140E-02
    3384 5S   172  TYR  HD2     5   0.115000       1.00800           0   0.00000     -0.301140E-02
    3385 5S   172  TYR  CE2    21  -0.115000       12.0110           0   0.00000     -0.301140E-02
    3386 5S   172  TYR  HE2     5   0.115000       1.00800           0   0.00000     -0.301140E-02
    3387 5S   172  TYR  C      20   0.510000       12.0110           0   0.00000     -0.301140E-02
    3388 5S   172  TYR  O      70  -0.510000       15.9990           0   0.00000     -0.301140E-02
    3389 5S   173  ALA  N      54  -0.470000       14.0070           0   0.00000     -0.301140E-02
    3390 5S   173  ALA  HN      1   0.310000       1.00800           0   0.00000     -0.301140E-02
    3391 5S   173  ALA  CA     22   0.700000E-01   12.0110           0   0.00000     -0.301140E-02
    3392 5S   173  ALA  HA      6   0.900000E-01   1.00800           0   0.00000     -0.301140E-02
    3393 5S   173  ALA  CB     24  -0.270000       12.0110           0   0.00000     -0.301140E-02
    3394 5S   173  ALA  HB1     3   0.900000E-01   1.00800           0   0.00000     -0.301140E-02
    3395 5S   173  ALA  HB2     3   0.900000E-01   1.00800           0   0.00000     -0.301140E-02
    3396 5S   173  ALA  HB3     3   0.900000E-01   1.00800           0   0.00000     -0.301140E-02
    3397 5S   173  ALA  C      32   0.340000       12.0110           0   0.00000     -0.301140E-02
    3398 5S   173  ALA  OT1    72  -0.670000       15.9990           0   0.00000       0.00000    
    3399 5S   173  ALA  OT2    72  -0.670000       15.9990           0   0.00000     -0.301140E-02
    3400 6S   50   ALA  N      56  -0.300000       14.0070           0   0.00000     -0.301140E-02
    3401 6S   50   ALA  HT1     2   0.330000       1.00800           0   0.00000     -0.301140E-02
    3402 6S   50   ALA  HT2     2   0.330000       1.00800           0   0.00000     -0.301140E-02
    3403 6S   50   ALA  HT3     2   0.330000       1.00800           0   0.00000     -0.301140E-02
    3404 6S   50   ALA  CA     22   0.210000       12.0110           0   0.00000     -0.301140E-02
    3405 6S   50   ALA  HA      6   0.100000       1.00800           0   0.00000     -0.301140E-02
    3406 6S   50   ALA  CB     24  -0.270000       12.0110           0   0.00000     -0.301140E-02
    3407 6S   50   ALA  HB1     3   0.900000E-01   1.00800           0   0.00000     -0.301140E-02
    3408 6S   50   ALA  HB2     3   0.900000E-01   1.00800           0   0.00000     -0.301140E-02
    3409 6S   50   ALA  HB3     3   0.900000E-01   1.00800           0   0.00000     -0.301140E-02
    3410 6S   50   ALA  C      20   0.510000       12.0110           0   0.00000     -0.301140E-02
    3411 6S   50   ALA  O      70  -0.510000       15.9990           0   0.00000     -0.301140E-02
    3412 6S   51   SER  N      54  -0.470000       14.0070           0   0.00000     -0.301140E-02
    3413 6S   51   SER  HN      1   0.310000       1.00800           0   0.00000     -0.301140E-02
    3414 6S   51   SER  CA     22   0.700000E-01   12.0110           0   0.00000     -0.301140E-02
    3415 6S   51   SER  HA      6   0.900000E-01   1.00800           0   0.00000     -0.301140E-02
    3416 6S   51   SER  CB     23   0.500000E-01   12.0110           0   0.00000     -0.301140E-02
    3417 6S   51   SER  HB1     3   0.900000E-01   1.00800           0   0.00000     -0.301140E-02
    3418 6S   51   SER  HB2     3   0.900000E-01   1.00800           0   0.00000     -0.301140E-02
    3419 6S   51   SER  OG     73  -0.660000       15.9990           0   0.00000     -0.301140E-02
    3420 6S   51   SER  HG1     1   0.430000       1.00800           0   0.00000     -0.301140E-02
    3421 6S   51   SER  C      20   0.510000       12.0110           0   0.00000     -0.301140E-02
    3422 6S   51   SER  O      70  -0.510000       15.9990           0   0.00000     -0.301140E-02
    3423 6S   52   TRP  N      54  -0.470000       14.0070           0   0.00000     -0.301140E-02
    3424 6S   52   TRP  HN      1   0.310000       1.00800           0   0.00000     -0.301140E-02
    3425 6S   52   TRP  CA     22   0.700000E-01   12.0110           0   0.00000     -0.301140E-02
    3426 6S   52   TRP  HA      6   0.900000E-01   1.00800           0   0.00000     -0.301140E-02
    3427 6S   52   TRP  CB     23  -0.180000       12.0110           0   0.00000     -0.301140E-02
    3428 6S   52   TRP  HB1     3   0.900000E-01   1.00800           0   0.00000     -0.301140E-02
    3429 6S   52   TRP  HB2     3   0.900000E-01   1.00800           0   0.00000     -0.301140E-02
    3430 6S   52   TRP  CG     28  -0.300000E-01   12.0110           0   0.00000     -0.301140E-02
    3431 6S   52   TRP  CD1    21   0.350000E-01   12.0110           0   0.00000     -0.301140E-02
    3432 6S   52   TRP  HD1     5   0.115000       1.00800           0   0.00000     -0.301140E-02
    3433 6S   52   TRP  NE1    58  -0.610000       14.0070           0   0.00000     -0.301140E-02
    3434 6S   52   TRP  HE1     1   0.380000       1.00800           0   0.00000     -0.301140E-02
    3435 6S   52   TRP  CE2    27   0.130000       12.0110           0   0.00000     -0.301140E-02
    3436 6S   52   TRP  CD2    27  -0.200000E-01   12.0110           0   0.00000     -0.301140E-02
    3437 6S   52   TRP  CE3    21  -0.115000       12.0110           0   0.00000     -0.301140E-02
    3438 6S   52   TRP  HE3     5   0.115000       1.00800           0   0.00000     -0.301140E-02
    3439 6S   52   TRP  CZ3    21  -0.115000       12.0110           0   0.00000     -0.301140E-02
    3440 6S   52   TRP  HZ3     5   0.115000       1.00800           0   0.00000     -0.301140E-02
    3441 6S   52   TRP  CZ2    21  -0.115000       12.0110           0   0.00000     -0.301140E-02
    3442 6S   52   TRP  HZ2     5   0.115000       1.00800           0   0.00000     -0.301140E-02
    3443 6S   52   TRP  CH2    21  -0.115000       12.0110           0   0.00000     -0.301140E-02
    3444 6S   52   TRP  HH2     5   0.115000       1.00800           0   0.00000     -0.301140E-02
    3445 6S   52   TRP  C      20   0.510000       12.0110           0   0.00000     -0.301140E-02
    3446 6S   52   TRP  O      70  -0.510000       15.9990           0   0.00000     -0.301140E-02
    3447 6S   53   PHE  N      54  -0.470000       14.0070           0   0.00000     -0.301140E-02
    3448 6S   53   PHE  HN      1   0.310000       1.00800           0   0.00000     -0.301140E-02
    3449 6S   53   PHE  CA     22   0.700000E-01   12.0110           0   0.00000     -0.301140E-02
    3450 6S   53   PHE  HA      6   0.900000E-01   1.00800           0   0.00000     -0.301140E-02
    3451 6S   53   PHE  CB     23  -0.180000       12.0110           0   0.00000     -0.301140E-02
    3452 6S   53   PHE  HB1     3   0.900000E-01   1.00800           0   0.00000     -0.301140E-02
    3453 6S   53   PHE  HB2     3   0.900000E-01   1.00800           0   0.00000     -0.301140E-02
    3454 6S   53   PHE  CG     21    0.00000       12.0110           0   0.00000     -0.301140E-02
    3455 6S   53   PHE  CD1    21  -0.115000       12.0110           0   0.00000     -0.301140E-02
    3456 6S   53   PHE  HD1     5   0.115000       1.00800           0   0.00000     -0.301140E-02
    3457 6S   53   PHE  CE1    21  -0.115000       12.0110           0   0.00000     -0.301140E-02
    3458 6S   53   PHE  HE1     5   0.115000       1.00800           0   0.00000     -0.301140E-02
    3459 6S   53   PHE  CZ     21  -0.115000       12.0110           0   0.00000     -0.301140E-02
    3460 6S   53   PHE  HZ      5   0.115000       1.00800           0   0.00000     -0.301140E-02
    3461 6S   53   PHE  CD2    21  -0.115000       12.0110           0   0.00000     -0.301140E-02
    3462 6S   53   PHE  HD2     5   0.115000       1.00800           0   0.00000     -0.301140E-02
    3463 6S   53   PHE  CE2    21  -0.115000       12.0110           0   0.00000     -0.301140E-02
    3464 6S   53   PHE  HE2     5   0.115000       1.00800           0   0.00000     -0.301140E-02
    3465 6S   53   PHE  C      20   0.510000       12.0110           0   0.00000     -0.301140E-02
    3466 6S   53   PHE  O      70  -0.510000       15.9990           0   0.00000     -0.301140E-02
    3467 6S   54   THR  N      54  -0.470000       14.0070           0   0.00000     -0.301140E-02
    3468 6S   54   THR  HN      1   0.310000       1.00800           0   0.00000     -0.301140E-02
    3469 6S   54   THR  CA     22   0.700000E-01   12.0110           0   0.00000     -0.301140E-02
    3470 6S   54   THR  HA      6   0.900000E-01   1.00800           0   0.00000     -0.301140E-02
    3471 6S   54   THR  CB     22   0.140000       12.0110           0   0.00000     -0.301140E-02
    3472 6S   54   THR  HB      3   0.900000E-01   1.00800           0   0.00000     -0.301140E-02
    3473 6S   54   THR  OG1    73  -0.660000       15.9990           0   0.00000     -0.301140E-02
    3474 6S   54   THR  HG1     1   0.430000       1.00800           0   0.00000     -0.301140E-02
    3475 6S   54   THR  CG2    24  -0.270000       12.0110           0   0.00000     -0.301140E-02
    3476 6S   54   THR  HG21    3   0.900000E-01   1.00800           0   0.00000     -0.301140E-02
    3477 6S   54   THR  HG22    3   0.900000E-01   1.00800           0   0.00000     -0.301140E-02
    3478 6S   54   THR  HG23    3   0.900000E-01   1.00800           0   0.00000     -0.301140E-02
    3479 6S   54   THR  C      20   0.510000       12.0110           0   0.00000     -0.301140E-02
    3480 6S   54   THR  O      70  -0.510000       15.9990           0   0.00000     -0.301140E-02
    3481 6S   55   ALA  N      54  -0.470000       14.0070           0   0.00000     -0.301140E-02
    3482 6S   55   ALA  HN      1   0.310000       1.00800           0   0.00000     -0.301140E-02
    3483 6S   55   ALA  CA     22   0.700000E-01   12.0110           0   0.00000     -0.301140E-02
    3484 6S   55   ALA  HA      6   0.900000E-01   1.00800           0   0.00000     -0.301140E-02
    3485 6S   55   ALA  CB     24  -0.270000       12.0110           0   0.00000     -0.301140E-02
    3486 6S   55   ALA  HB1     3   0.900000E-01   1.00800           0   0.00000     -0.301140E-02
    3487 6S   55   ALA  HB2     3   0.900000E-01   1.00800           0   0.00000     -0.301140E-02
    3488 6S   55   ALA  HB3     3   0.900000E-01   1.00800           0   0.00000     -0.301140E-02
    3489 6S   55   ALA  C      20   0.510000       12.0110           0   0.00000     -0.301140E-02
    3490 6S   55   ALA  O      70  -0.510000       15.9990           0   0.00000     -0.301140E-02
    3491 6S   56   LEU  N      54  -0.470000       14.0070           0   0.00000     -0.301140E-02
    3492 6S   56   LEU  HN      1   0.310000       1.00800           0   0.00000     -0.301140E-02
    3493 6S   56   LEU  CA     22   0.700000E-01   12.0110           0   0.00000     -0.301140E-02
    3494 6S   56   LEU  HA      6   0.900000E-01   1.00800           0   0.00000     -0.301140E-02
    3495 6S   56   LEU  CB     23  -0.180000       12.0110           0   0.00000     -0.301140E-02
    3496 6S   56   LEU  HB1     3   0.900000E-01   1.00800           0   0.00000     -0.301140E-02
    3497 6S   56   LEU  HB2     3   0.900000E-01   1.00800           0   0.00000     -0.301140E-02
    3498 6S   56   LEU  CG     22  -0.900000E-01   12.0110           0   0.00000     -0.301140E-02
    3499 6S   56   LEU  HG      3   0.900000E-01   1.00800           0   0.00000     -0.301140E-02
    3500 6S   56   LEU  CD1    24  -0.270000       12.0110           0   0.00000     -0.301140E-02
    3501 6S   56   LEU  HD11    3   0.900000E-01   1.00800           0   0.00000     -0.301140E-02
    3502 6S   56   LEU  HD12    3   0.900000E-01   1.00800           0   0.00000     -0.301140E-02
    3503 6S   56   LEU  HD13    3   0.900000E-01   1.00800           0   0.00000     -0.301140E-02
    3504 6S   56   LEU  CD2    24  -0.270000       12.0110           0   0.00000     -0.301140E-02
    3505 6S   56   LEU  HD21    3   0.900000E-01   1.00800           0   0.00000     -0.301140E-02
    3506 6S   56   LEU  HD22    3   0.900000E-01   1.00800           0   0.00000     -0.301140E-02
    3507 6S   56   LEU  HD23    3   0.900000E-01   1.00800           0   0.00000     -0.301140E-02
    3508 6S   56   LEU  C      20   0.510000       12.0110           0   0.00000     -0.301140E-02
    3509 6S   56   LEU  O      70  -0.510000       15.9990           0   0.00000     -0.301140E-02
    3510 6S   57   THR  N      54  -0.470000       14.0070           0   0.00000     -0.301140E-02
    3511 6S   57   THR  HN      1   0.310000       1.00800           0   0.00000     -0.301140E-02
    3512 6S   57   THR  CA     22   0.700000E-01   12.0110           0   0.00000     -0.301140E-02
    3513 6S   57   THR  HA      6   0.900000E-01   1.00800           0   0.00000     -0.301140E-02
    3514 6S   57   THR  CB     22   0.140000       12.0110           0   0.00000     -0.301140E-02
    3515 6S   57   THR  HB      3   0.900000E-01   1.00800           0   0.00000     -0.301140E-02
    3516 6S   57   THR  OG1    73  -0.660000       15.9990           0   0.00000     -0.301140E-02
    3517 6S   57   THR  HG1     1   0.430000       1.00800           0   0.00000     -0.301140E-02
    3518 6S   57   THR  CG2    24  -0.270000       12.0110           0   0.00000     -0.301140E-02
    3519 6S   57   THR  HG21    3   0.900000E-01   1.00800           0   0.00000     -0.301140E-02
    3520 6S   57   THR  HG22    3   0.900000E-01   1.00800           0   0.00000     -0.301140E-02
    3521 6S   57   THR  HG23    3   0.900000E-01   1.00800           0   0.00000     -0.301140E-02
    3522 6S   57   THR  C      20   0.510000       12.0110           0   0.00000     -0.301140E-02
    3523 6S   57   THR  O      70  -0.510000       15.9990           0   0.00000     -0.301140E-02
    3524 6S   58   GLN  N      54  -0.470000       14.0070           0   0.00000     -0.301140E-02
    3525 6S   58   GLN  HN      1   0.310000       1.00800           0   0.00000     -0.301140E-02
    3526 6S   58   GLN  CA     22   0.700000E-01   12.0110           0   0.00000     -0.301140E-02
    3527 6S   58   GLN  HA      6   0.900000E-01   1.00800           0   0.00000     -0.301140E-02
    3528 6S   58   GLN  CB     23  -0.180000       12.0110           0   0.00000     -0.301140E-02
    3529 6S   58   GLN  HB1     3   0.900000E-01   1.00800           0   0.00000     -0.301140E-02
    3530 6S   58   GLN  HB2     3   0.900000E-01   1.00800           0   0.00000     -0.301140E-02
    3531 6S   58   GLN  CG     23  -0.180000       12.0110           0   0.00000     -0.301140E-02
    3532 6S   58   GLN  HG1     3   0.900000E-01   1.00800           0   0.00000     -0.301140E-02
    3533 6S   58   GLN  HG2     3   0.900000E-01   1.00800           0   0.00000     -0.301140E-02
    3534 6S   58   GLN  CD     32   0.550000       12.0110           0   0.00000     -0.301140E-02
    3535 6S   58   GLN  OE1    70  -0.550000       15.9990           0   0.00000     -0.301140E-02
    3536 6S   58   GLN  NE2    55  -0.620000       14.0070           0   0.00000     -0.301140E-02
    3537 6S   58   GLN  HE21    1   0.320000       1.00800           0   0.00000     -0.301140E-02
    3538 6S   58   GLN  HE22    1   0.300000       1.00800           0   0.00000     -0.301140E-02
    3539 6S   58   GLN  C      20   0.510000       12.0110           0   0.00000     -0.301140E-02
    3540 6S   58   GLN  O      70  -0.510000       15.9990           0   0.00000     -0.301140E-02
    3541 6S   59   HSD  N      54  -0.470000       14.0070           0   0.00000     -0.301140E-02
    3542 6S   59   HSD  HN      1   0.310000       1.00800           0   0.00000     -0.301140E-02
    3543 6S   59   HSD  CA     22   0.700000E-01   12.0110           0   0.00000     -0.301140E-02
    3544 6S   59   HSD  HA      6   0.900000E-01   1.00800           0   0.00000     -0.301140E-02
    3545 6S   59   HSD  CB     23  -0.900000E-01   12.0110           0   0.00000     -0.301140E-02
    3546 6S   59   HSD  HB1     3   0.900000E-01   1.00800           0   0.00000     -0.301140E-02
    3547 6S   59   HSD  HB2     3   0.900000E-01   1.00800           0   0.00000     -0.301140E-02
    3548 6S   59   HSD  ND1    51  -0.360000       14.0070           0   0.00000     -0.301140E-02
    3549 6S   59   HSD  HD1     1   0.320000       1.00800           0   0.00000     -0.301140E-02
    3550 6S   59   HSD  CG     25  -0.500000E-01   12.0110           0   0.00000     -0.301140E-02
    3551 6S   59   HSD  CE1    26   0.250000       12.0110           0   0.00000     -0.301140E-02
    3552 6S   59   HSD  HE1     7   0.130000       1.00800           0   0.00000     -0.301140E-02
    3553 6S   59   HSD  NE2    52  -0.700000       14.0070           0   0.00000     -0.301140E-02
    3554 6S   59   HSD  CD2    25   0.220000       12.0110           0   0.00000     -0.301140E-02
    3555 6S   59   HSD  HD2     9   0.100000       1.00800           0   0.00000     -0.301140E-02
    3556 6S   59   HSD  C      20   0.510000       12.0110           0   0.00000     -0.301140E-02
    3557 6S   59   HSD  O      70  -0.510000       15.9990           0   0.00000     -0.301140E-02
    3558 6S   60   GLY  N      54  -0.470000       14.0070           0   0.00000     -0.301140E-02
    3559 6S   60   GLY  HN      1   0.310000       1.00800           0   0.00000     -0.301140E-02
    3560 6S   60   GLY  CA     23  -0.200000E-01   12.0110           0   0.00000     -0.301140E-02
    3561 6S   60   GLY  HA1     6   0.900000E-01   1.00800           0   0.00000     -0.301140E-02
    3562 6S   60   GLY  HA2     6   0.900000E-01   1.00800           0   0.00000     -0.301140E-02
    3563 6S   60   GLY  C      20   0.510000       12.0110           0   0.00000     -0.301140E-02
    3564 6S   60   GLY  O      70  -0.510000       15.9990           0   0.00000     -0.301140E-02
    3565 6S   61   LYS  N      54  -0.470000       14.0070           0   0.00000     -0.301140E-02
    3566 6S   61   LYS  HN      1   0.310000       1.00800           0   0.00000     -0.301140E-02
    3567 6S   61   LYS  CA     22   0.700000E-01   12.0110           0   0.00000     -0.301140E-02
    3568 6S   61   LYS  HA      6   0.900000E-01   1.00800           0   0.00000     -0.301140E-02
    3569 6S   61   LYS  CB     23  -0.180000       12.0110           0   0.00000     -0.301140E-02
    3570 6S   61   LYS  HB1     3   0.900000E-01   1.00800           0   0.00000     -0.301140E-02
    3571 6S   61   LYS  HB2     3   0.900000E-01   1.00800           0   0.00000     -0.301140E-02
    3572 6S   61   LYS  CG     23  -0.180000       12.0110           0   0.00000     -0.301140E-02
    3573 6S   61   LYS  HG1     3   0.900000E-01   1.00800           0   0.00000     -0.301140E-02
    3574 6S   61   LYS  HG2     3   0.900000E-01   1.00800           0   0.00000     -0.301140E-02
    3575 6S   61   LYS  CD     23  -0.180000       12.0110           0   0.00000     -0.301140E-02
    3576 6S   61   LYS  HD1     3   0.900000E-01   1.00800           0   0.00000     -0.301140E-02
    3577 6S   61   LYS  HD2     3   0.900000E-01   1.00800           0   0.00000     -0.301140E-02
    3578 6S   61   LYS  CE     23   0.210000       12.0110           0   0.00000     -0.301140E-02
    3579 6S   61   LYS  HE1     3   0.500000E-01   1.00800           0   0.00000     -0.301140E-02
    3580 6S   61   LYS  HE2     3   0.500000E-01   1.00800           0   0.00000     -0.301140E-02
    3581 6S   61   LYS  NZ     56  -0.300000       14.0070           0   0.00000     -0.301140E-02
    3582 6S   61   LYS  HZ1     2   0.330000       1.00800           0   0.00000     -0.301140E-02
    3583 6S   61   LYS  HZ2     2   0.330000       1.00800           0   0.00000     -0.301140E-02
    3584 6S   61   LYS  HZ3     2   0.330000       1.00800           0   0.00000     -0.301140E-02
    3585 6S   61   LYS  C      20   0.510000       12.0110           0   0.00000     -0.301140E-02
    3586 6S   61   LYS  O      70  -0.510000       15.9990           0   0.00000     -0.301140E-02
    3587 6S   62   GLU  N      54  -0.470000       14.0070           0   0.00000     -0.301140E-02
    3588 6S   62   GLU  HN      1   0.310000       1.00800           0   0.00000     -0.301140E-02
    3589 6S   62   GLU  CA     22   0.700000E-01   12.0110           0   0.00000     -0.301140E-02
    3590 6S   62   GLU  HA      6   0.900000E-01   1.00800           0   0.00000     -0.301140E-02
    3591 6S   62   GLU  CB     23  -0.180000       12.0110           0   0.00000     -0.301140E-02
    3592 6S   62   GLU  HB1     3   0.900000E-01   1.00800           0   0.00000     -0.301140E-02
    3593 6S   62   GLU  HB2     3   0.900000E-01   1.00800           0   0.00000     -0.301140E-02
    3594 6S   62   GLU  CG     23  -0.280000       12.0110           0   0.00000     -0.301140E-02
    3595 6S   62   GLU  HG1     3   0.900000E-01   1.00800           0   0.00000     -0.301140E-02
    3596 6S   62   GLU  HG2     3   0.900000E-01   1.00800           0   0.00000     -0.301140E-02
    3597 6S   62   GLU  CD     32   0.620000       12.0110           0   0.00000     -0.301140E-02
    3598 6S   62   GLU  OE1    72  -0.760000       15.9990           0   0.00000     -0.301140E-02
    3599 6S   62   GLU  OE2    72  -0.760000       15.9990           0   0.00000     -0.301140E-02
    3600 6S   62   GLU  C      20   0.510000       12.0110           0   0.00000     -0.301140E-02
    3601 6S   62   GLU  O      70  -0.510000       15.9990           0   0.00000     -0.301140E-02
    3602 6S   63   ASP  N      54  -0.470000       14.0070           0   0.00000     -0.301140E-02
    3603 6S   63   ASP  HN      1   0.310000       1.00800           0   0.00000     -0.301140E-02
    3604 6S   63   ASP  CA     22   0.700000E-01   12.0110           0   0.00000     -0.301140E-02
    3605 6S   63   ASP  HA      6   0.900000E-01   1.00800           0   0.00000     -0.301140E-02
    3606 6S   63   ASP  CB     23  -0.280000       12.0110           0   0.00000     -0.301140E-02
    3607 6S   63   ASP  HB1     3   0.900000E-01   1.00800           0   0.00000     -0.301140E-02
    3608 6S   63   ASP  HB2     3   0.900000E-01   1.00800           0   0.00000     -0.301140E-02
    3609 6S   63   ASP  CG     32   0.620000       12.0110           0   0.00000     -0.301140E-02
    3610 6S   63   ASP  OD1    72  -0.760000       15.9990           0   0.00000     -0.301140E-02
    3611 6S   63   ASP  OD2    72  -0.760000       15.9990           0   0.00000     -0.301140E-02
    3612 6S   63   ASP  C      20   0.510000       12.0110           0   0.00000     -0.301140E-02
    3613 6S   63   ASP  O      70  -0.510000       15.9990           0   0.00000     -0.301140E-02
    3614 6S   64   LEU  N      54  -0.470000       14.0070           0   0.00000     -0.301140E-02
    3615 6S   64   LEU  HN      1   0.310000       1.00800           0   0.00000     -0.301140E-02
    3616 6S   64   LEU  CA     22   0.700000E-01   12.0110           0   0.00000     -0.301140E-02
    3617 6S   64   LEU  HA      6   0.900000E-01   1.00800           0   0.00000     -0.301140E-02
    3618 6S   64   LEU  CB     23  -0.180000       12.0110           0   0.00000     -0.301140E-02
    3619 6S   64   LEU  HB1     3   0.900000E-01   1.00800           0   0.00000     -0.301140E-02
    3620 6S   64   LEU  HB2     3   0.900000E-01   1.00800           0   0.00000     -0.301140E-02
    3621 6S   64   LEU  CG     22  -0.900000E-01   12.0110           0   0.00000     -0.301140E-02
    3622 6S   64   LEU  HG      3   0.900000E-01   1.00800           0   0.00000     -0.301140E-02
    3623 6S   64   LEU  CD1    24  -0.270000       12.0110           0   0.00000     -0.301140E-02
    3624 6S   64   LEU  HD11    3   0.900000E-01   1.00800           0   0.00000     -0.301140E-02
    3625 6S   64   LEU  HD12    3   0.900000E-01   1.00800           0   0.00000     -0.301140E-02
    3626 6S   64   LEU  HD13    3   0.900000E-01   1.00800           0   0.00000     -0.301140E-02
    3627 6S   64   LEU  CD2    24  -0.270000       12.0110           0   0.00000     -0.301140E-02
    3628 6S   64   LEU  HD21    3   0.900000E-01   1.00800           0   0.00000     -0.301140E-02
    3629 6S   64   LEU  HD22    3   0.900000E-01   1.00800           0   0.00000     -0.301140E-02
    3630 6S   64   LEU  HD23    3   0.900000E-01   1.00800           0   0.00000     -0.301140E-02
    3631 6S   64   LEU  C      20   0.510000       12.0110           0   0.00000     -0.301140E-02
    3632 6S   64   LEU  O      70  -0.510000       15.9990           0   0.00000     -0.301140E-02
    3633 6S   65   LYS  N      54  -0.470000       14.0070           0   0.00000     -0.301140E-02
    3634 6S   65   LYS  HN      1   0.310000       1.00800           0   0.00000     -0.301140E-02
    3635 6S   65   LYS  CA     22   0.700000E-01   12.0110           0   0.00000     -0.301140E-02
    3636 6S   65   LYS  HA      6   0.900000E-01   1.00800           0   0.00000     -0.301140E-02
    3637 6S   65   LYS  CB     23  -0.180000       12.0110           0   0.00000     -0.301140E-02
    3638 6S   65   LYS  HB1     3   0.900000E-01   1.00800           0   0.00000     -0.301140E-02
    3639 6S   65   LYS  HB2     3   0.900000E-01   1.00800           0   0.00000     -0.301140E-02
    3640 6S   65   LYS  CG     23  -0.180000       12.0110           0   0.00000     -0.301140E-02
    3641 6S   65   LYS  HG1     3   0.900000E-01   1.00800           0   0.00000     -0.301140E-02
    3642 6S   65   LYS  HG2     3   0.900000E-01   1.00800           0   0.00000     -0.301140E-02
    3643 6S   65   LYS  CD     23  -0.180000       12.0110           0   0.00000     -0.301140E-02
    3644 6S   65   LYS  HD1     3   0.900000E-01   1.00800           0   0.00000     -0.301140E-02
    3645 6S   65   LYS  HD2     3   0.900000E-01   1.00800           0   0.00000     -0.301140E-02
    3646 6S   65   LYS  CE     23   0.210000       12.0110           0   0.00000     -0.301140E-02
    3647 6S   65   LYS  HE1     3   0.500000E-01   1.00800           0   0.00000     -0.301140E-02
    3648 6S   65   LYS  HE2     3   0.500000E-01   1.00800           0   0.00000     -0.301140E-02
    3649 6S   65   LYS  NZ     56  -0.300000       14.0070           0   0.00000     -0.301140E-02
    3650 6S   65   LYS  HZ1     2   0.330000       1.00800           0   0.00000     -0.301140E-02
    3651 6S   65   LYS  HZ2     2   0.330000       1.00800           0   0.00000     -0.301140E-02
    3652 6S   65   LYS  HZ3     2   0.330000       1.00800           0   0.00000     -0.301140E-02
    3653 6S   65   LYS  C      20   0.510000       12.0110           0   0.00000     -0.301140E-02
    3654 6S   65   LYS  O      70  -0.510000       15.9990           0   0.00000     -0.301140E-02
    3655 6S   66   PHE  N      54  -0.470000       14.0070           0   0.00000     -0.301140E-02
    3656 6S   66   PHE  HN      1   0.310000       1.00800           0   0.00000     -0.301140E-02
    3657 6S   66   PHE  CA     22   0.700000E-01   12.0110           0   0.00000     -0.301140E-02
    3658 6S   66   PHE  HA      6   0.900000E-01   1.00800           0   0.00000     -0.301140E-02
    3659 6S   66   PHE  CB     23  -0.180000       12.0110           0   0.00000     -0.301140E-02
    3660 6S   66   PHE  HB1     3   0.900000E-01   1.00800           0   0.00000     -0.301140E-02
    3661 6S   66   PHE  HB2     3   0.900000E-01   1.00800           0   0.00000     -0.301140E-02
    3662 6S   66   PHE  CG     21    0.00000       12.0110           0   0.00000     -0.301140E-02
    3663 6S   66   PHE  CD1    21  -0.115000       12.0110           0   0.00000     -0.301140E-02
    3664 6S   66   PHE  HD1     5   0.115000       1.00800           0   0.00000     -0.301140E-02
    3665 6S   66   PHE  CE1    21  -0.115000       12.0110           0   0.00000     -0.301140E-02
    3666 6S   66   PHE  HE1     5   0.115000       1.00800           0   0.00000     -0.301140E-02
    3667 6S   66   PHE  CZ     21  -0.115000       12.0110           0   0.00000     -0.301140E-02
    3668 6S   66   PHE  HZ      5   0.115000       1.00800           0   0.00000     -0.301140E-02
    3669 6S   66   PHE  CD2    21  -0.115000       12.0110           0   0.00000     -0.301140E-02
    3670 6S   66   PHE  HD2     5   0.115000       1.00800           0   0.00000     -0.301140E-02
    3671 6S   66   PHE  CE2    21  -0.115000       12.0110           0   0.00000     -0.301140E-02
    3672 6S   66   PHE  HE2     5   0.115000       1.00800           0   0.00000     -0.301140E-02
    3673 6S   66   PHE  C      20   0.510000       12.0110           0   0.00000     -0.301140E-02
    3674 6S   66   PHE  O      70  -0.510000       15.9990           0   0.00000     -0.301140E-02
    3675 6S   67   PRO  N      50  -0.290000       14.0070           0   0.00000     -0.301140E-02
    3676 6S   67   PRO  CD     31    0.00000       12.0110           0   0.00000     -0.301140E-02
    3677 6S   67   PRO  HD1     3   0.900000E-01   1.00800           0   0.00000     -0.301140E-02
    3678 6S   67   PRO  HD2     3   0.900000E-01   1.00800           0   0.00000     -0.301140E-02
    3679 6S   67   PRO  CA     29   0.200000E-01   12.0110           0   0.00000     -0.301140E-02
    3680 6S   67   PRO  HA      6   0.900000E-01   1.00800           0   0.00000     -0.301140E-02
    3681 6S   67   PRO  CB     30  -0.180000       12.0110           0   0.00000     -0.301140E-02
    3682 6S   67   PRO  HB1     3   0.900000E-01   1.00800           0   0.00000     -0.301140E-02
    3683 6S   67   PRO  HB2     3   0.900000E-01   1.00800           0   0.00000     -0.301140E-02
    3684 6S   67   PRO  CG     30  -0.180000       12.0110           0   0.00000     -0.301140E-02
    3685 6S   67   PRO  HG1     3   0.900000E-01   1.00800           0   0.00000     -0.301140E-02
    3686 6S   67   PRO  HG2     3   0.900000E-01   1.00800           0   0.00000     -0.301140E-02
    3687 6S   67   PRO  C      20   0.510000       12.0110           0   0.00000     -0.301140E-02
    3688 6S   67   PRO  O      70  -0.510000       15.9990           0   0.00000     -0.301140E-02
    3689 6S   68   ARG  N      54  -0.470000       14.0070           0   0.00000     -0.301140E-02
    3690 6S   68   ARG  HN      1   0.310000       1.00800           0   0.00000     -0.301140E-02
    3691 6S   68   ARG  CA     22   0.700000E-01   12.0110           0   0.00000     -0.301140E-02
    3692 6S   68   ARG  HA      6   0.900000E-01   1.00800           0   0.00000     -0.301140E-02
    3693 6S   68   ARG  CB     23  -0.180000       12.0110           0   0.00000     -0.301140E-02
    3694 6S   68   ARG  HB1     3   0.900000E-01   1.00800           0   0.00000     -0.301140E-02
    3695 6S   68   ARG  HB2     3   0.900000E-01   1.00800           0   0.00000     -0.301140E-02
    3696 6S   68   ARG  CG     23  -0.180000       12.0110           0   0.00000     -0.301140E-02
    3697 6S   68   ARG  HG1     3   0.900000E-01   1.00800           0   0.00000     -0.301140E-02
    3698 6S   68   ARG  HG2     3   0.900000E-01   1.00800           0   0.00000     -0.301140E-02
    3699 6S   68   ARG  CD     23   0.200000       12.0110           0   0.00000     -0.301140E-02
    3700 6S   68   ARG  HD1     3   0.900000E-01   1.00800           0   0.00000     -0.301140E-02
    3701 6S   68   ARG  HD2     3   0.900000E-01   1.00800           0   0.00000     -0.301140E-02
    3702 6S   68   ARG  NE     57  -0.700000       14.0070           0   0.00000     -0.301140E-02
    3703 6S   68   ARG  HE      2   0.440000       1.00800           0   0.00000     -0.301140E-02
    3704 6S   68   ARG  CZ     20   0.640000       12.0110           0   0.00000     -0.301140E-02
    3705 6S   68   ARG  NH1    57  -0.800000       14.0070           0   0.00000     -0.301140E-02
    3706 6S   68   ARG  HH11    2   0.460000       1.00800           0   0.00000     -0.301140E-02
    3707 6S   68   ARG  HH12    2   0.460000       1.00800           0   0.00000     -0.301140E-02
    3708 6S   68   ARG  NH2    57  -0.800000       14.0070           0   0.00000     -0.301140E-02
    3709 6S   68   ARG  HH21    2   0.460000       1.00800           0   0.00000     -0.301140E-02
    3710 6S   68   ARG  HH22    2   0.460000       1.00800           0   0.00000     -0.301140E-02
    3711 6S   68   ARG  C      20   0.510000       12.0110           0   0.00000     -0.301140E-02
    3712 6S   68   ARG  O      70  -0.510000       15.9990           0   0.00000     -0.301140E-02
    3713 6S   69   GLY  N      54  -0.470000       14.0070           0   0.00000     -0.301140E-02
    3714 6S   69   GLY  HN      1   0.310000       1.00800           0   0.00000     -0.301140E-02
    3715 6S   69   GLY  CA     23  -0.200000E-01   12.0110           0   0.00000     -0.301140E-02
    3716 6S   69   GLY  HA1     6   0.900000E-01   1.00800           0   0.00000     -0.301140E-02
    3717 6S   69   GLY  HA2     6   0.900000E-01   1.00800           0   0.00000     -0.301140E-02
    3718 6S   69   GLY  C      20   0.510000       12.0110           0   0.00000     -0.301140E-02
    3719 6S   69   GLY  O      70  -0.510000       15.9990           0   0.00000     -0.301140E-02
    3720 6S   70   GLN  N      54  -0.470000       14.0070           0   0.00000     -0.301140E-02
    3721 6S   70   GLN  HN      1   0.310000       1.00800           0   0.00000     -0.301140E-02
    3722 6S   70   GLN  CA     22   0.700000E-01   12.0110           0   0.00000     -0.301140E-02
    3723 6S   70   GLN  HA      6   0.900000E-01   1.00800           0   0.00000     -0.301140E-02
    3724 6S   70   GLN  CB     23  -0.180000       12.0110           0   0.00000     -0.301140E-02
    3725 6S   70   GLN  HB1     3   0.900000E-01   1.00800           0   0.00000     -0.301140E-02
    3726 6S   70   GLN  HB2     3   0.900000E-01   1.00800           0   0.00000     -0.301140E-02
    3727 6S   70   GLN  CG     23  -0.180000       12.0110           0   0.00000     -0.301140E-02
    3728 6S   70   GLN  HG1     3   0.900000E-01   1.00800           0   0.00000     -0.301140E-02
    3729 6S   70   GLN  HG2     3   0.900000E-01   1.00800           0   0.00000     -0.301140E-02
    3730 6S   70   GLN  CD     32   0.550000       12.0110           0   0.00000     -0.301140E-02
    3731 6S   70   GLN  OE1    70  -0.550000       15.9990           0   0.00000     -0.301140E-02
    3732 6S   70   GLN  NE2    55  -0.620000       14.0070           0   0.00000     -0.301140E-02
    3733 6S   70   GLN  HE21    1   0.320000       1.00800           0   0.00000     -0.301140E-02
    3734 6S   70   GLN  HE22    1   0.300000       1.00800           0   0.00000     -0.301140E-02
    3735 6S   70   GLN  C      20   0.510000       12.0110           0   0.00000     -0.301140E-02
    3736 6S   70   GLN  O      70  -0.510000       15.9990           0   0.00000     -0.301140E-02
    3737 6S   71   GLY  N      54  -0.470000       14.0070           0   0.00000     -0.301140E-02
    3738 6S   71   GLY  HN      1   0.310000       1.00800           0   0.00000     -0.301140E-02
    3739 6S   71   GLY  CA     23  -0.200000E-01   12.0110           0   0.00000     -0.301140E-02
    3740 6S   71   GLY  HA1     6   0.900000E-01   1.00800           0   0.00000     -0.301140E-02
    3741 6S   71   GLY  HA2     6   0.900000E-01   1.00800           0   0.00000     -0.301140E-02
    3742 6S   71   GLY  C      20   0.510000       12.0110           0   0.00000     -0.301140E-02
    3743 6S   71   GLY  O      70  -0.510000       15.9990           0   0.00000     -0.301140E-02
    3744 6S   72   VAL  N      54  -0.470000       14.0070           0   0.00000     -0.301140E-02
    3745 6S   72   VAL  HN      1   0.310000       1.00800           0   0.00000     -0.301140E-02
    3746 6S   72   VAL  CA     22   0.700000E-01   12.0110           0   0.00000     -0.301140E-02
    3747 6S   72   VAL  HA      6   0.900000E-01   1.00800           0   0.00000     -0.301140E-02
    3748 6S   72   VAL  CB     22  -0.900000E-01   12.0110           0   0.00000     -0.301140E-02
    3749 6S   72   VAL  HB      3   0.900000E-01   1.00800           0   0.00000     -0.301140E-02
    3750 6S   72   VAL  CG1    24  -0.270000       12.0110           0   0.00000     -0.301140E-02
    3751 6S   72   VAL  HG11    3   0.900000E-01   1.00800           0   0.00000     -0.301140E-02
    3752 6S   72   VAL  HG12    3   0.900000E-01   1.00800           0   0.00000     -0.301140E-02
    3753 6S   72   VAL  HG13    3   0.900000E-01   1.00800           0   0.00000     -0.301140E-02
    3754 6S   72   VAL  CG2    24  -0.270000       12.0110           0   0.00000     -0.301140E-02
    3755 6S   72   VAL  HG21    3   0.900000E-01   1.00800           0   0.00000     -0.301140E-02
    3756 6S   72   VAL  HG22    3   0.900000E-01   1.00800           0   0.00000     -0.301140E-02
    3757 6S   72   VAL  HG23    3   0.900000E-01   1.00800           0   0.00000     -0.301140E-02
    3758 6S   72   VAL  C      20   0.510000       12.0110           0   0.00000     -0.301140E-02
    3759 6S   72   VAL  O      70  -0.510000       15.9990           0   0.00000     -0.301140E-02
    3760 6S   73   PRO  N      50  -0.290000       14.0070           0   0.00000     -0.301140E-02
    3761 6S   73   PRO  CD     31    0.00000       12.0110           0   0.00000     -0.301140E-02
    3762 6S   73   PRO  HD1     3   0.900000E-01   1.00800           0   0.00000     -0.301140E-02
    3763 6S   73   PRO  HD2     3   0.900000E-01   1.00800           0   0.00000     -0.301140E-02
    3764 6S   73   PRO  CA     29   0.200000E-01   12.0110           0   0.00000     -0.301140E-02
    3765 6S   73   PRO  HA      6   0.900000E-01   1.00800           0   0.00000     -0.301140E-02
    3766 6S   73   PRO  CB     30  -0.180000       12.0110           0   0.00000     -0.301140E-02
    3767 6S   73   PRO  HB1     3   0.900000E-01   1.00800           0   0.00000     -0.301140E-02
    3768 6S   73   PRO  HB2     3   0.900000E-01   1.00800           0   0.00000     -0.301140E-02
    3769 6S   73   PRO  CG     30  -0.180000       12.0110           0   0.00000     -0.301140E-02
    3770 6S   73   PRO  HG1     3   0.900000E-01   1.00800           0   0.00000     -0.301140E-02
    3771 6S   73   PRO  HG2     3   0.900000E-01   1.00800           0   0.00000     -0.301140E-02
    3772 6S   73   PRO  C      20   0.510000       12.0110           0   0.00000     -0.301140E-02
    3773 6S   73   PRO  O      70  -0.510000       15.9990           0   0.00000     -0.301140E-02
    3774 6S   74   ILE  N      54  -0.470000       14.0070           0   0.00000     -0.301140E-02
    3775 6S   74   ILE  HN      1   0.310000       1.00800           0   0.00000     -0.301140E-02
    3776 6S   74   ILE  CA     22   0.700000E-01   12.0110           0   0.00000     -0.301140E-02
    3777 6S   74   ILE  HA      6   0.900000E-01   1.00800           0   0.00000     -0.301140E-02
    3778 6S   74   ILE  CB     22  -0.900000E-01   12.0110           0   0.00000     -0.301140E-02
    3779 6S   74   ILE  HB      3   0.900000E-01   1.00800           0   0.00000     -0.301140E-02
    3780 6S   74   ILE  CG2    24  -0.270000       12.0110           0   0.00000     -0.301140E-02
    3781 6S   74   ILE  HG21    3   0.900000E-01   1.00800           0   0.00000     -0.301140E-02
    3782 6S   74   ILE  HG22    3   0.900000E-01   1.00800           0   0.00000     -0.301140E-02
    3783 6S   74   ILE  HG23    3   0.900000E-01   1.00800           0   0.00000     -0.301140E-02
    3784 6S   74   ILE  CG1    23  -0.180000       12.0110           0   0.00000     -0.301140E-02
    3785 6S   74   ILE  HG11    3   0.900000E-01   1.00800           0   0.00000     -0.301140E-02
    3786 6S   74   ILE  HG12    3   0.900000E-01   1.00800           0   0.00000     -0.301140E-02
    3787 6S   74   ILE  CD     24  -0.270000       12.0110           0   0.00000     -0.301140E-02
    3788 6S   74   ILE  HD1     3   0.900000E-01   1.00800           0   0.00000     -0.301140E-02
    3789 6S   74   ILE  HD2     3   0.900000E-01   1.00800           0   0.00000     -0.301140E-02
    3790 6S   74   ILE  HD3     3   0.900000E-01   1.00800           0   0.00000     -0.301140E-02
    3791 6S   74   ILE  C      20   0.510000       12.0110           0   0.00000     -0.301140E-02
    3792 6S   74   ILE  O      70  -0.510000       15.9990           0   0.00000     -0.301140E-02
    3793 6S   75   ASN  N      54  -0.470000       14.0070           0   0.00000     -0.301140E-02
    3794 6S   75   ASN  HN      1   0.310000       1.00800           0   0.00000     -0.301140E-02
    3795 6S   75   ASN  CA     22   0.700000E-01   12.0110           0   0.00000     -0.301140E-02
    3796 6S   75   ASN  HA      6   0.900000E-01   1.00800           0   0.00000     -0.301140E-02
    3797 6S   75   ASN  CB     23  -0.180000       12.0110           0   0.00000     -0.301140E-02
    3798 6S   75   ASN  HB1     3   0.900000E-01   1.00800           0   0.00000     -0.301140E-02
    3799 6S   75   ASN  HB2     3   0.900000E-01   1.00800           0   0.00000     -0.301140E-02
    3800 6S   75   ASN  CG     32   0.550000       12.0110           0   0.00000     -0.301140E-02
    3801 6S   75   ASN  OD1    70  -0.550000       15.9990           0   0.00000     -0.301140E-02
    3802 6S   75   ASN  ND2    55  -0.620000       14.0070           0   0.00000     -0.301140E-02
    3803 6S   75   ASN  HD21    1   0.320000       1.00800           0   0.00000     -0.301140E-02
    3804 6S   75   ASN  HD22    1   0.300000       1.00800           0   0.00000     -0.301140E-02
    3805 6S   75   ASN  C      20   0.510000       12.0110           0   0.00000     -0.301140E-02
    3806 6S   75   ASN  O      70  -0.510000       15.9990           0   0.00000     -0.301140E-02
    3807 6S   76   THR  N      54  -0.470000       14.0070           0   0.00000     -0.301140E-02
    3808 6S   76   THR  HN      1   0.310000       1.00800           0   0.00000     -0.301140E-02
    3809 6S   76   THR  CA     22   0.700000E-01   12.0110           0   0.00000     -0.301140E-02
    3810 6S   76   THR  HA      6   0.900000E-01   1.00800           0   0.00000     -0.301140E-02
    3811 6S   76   THR  CB     22   0.140000       12.0110           0   0.00000     -0.301140E-02
    3812 6S   76   THR  HB      3   0.900000E-01   1.00800           0   0.00000     -0.301140E-02
    3813 6S   76   THR  OG1    73  -0.660000       15.9990           0   0.00000     -0.301140E-02
    3814 6S   76   THR  HG1     1   0.430000       1.00800           0   0.00000     -0.301140E-02
    3815 6S   76   THR  CG2    24  -0.270000       12.0110           0   0.00000     -0.301140E-02
    3816 6S   76   THR  HG21    3   0.900000E-01   1.00800           0   0.00000     -0.301140E-02
    3817 6S   76   THR  HG22    3   0.900000E-01   1.00800           0   0.00000     -0.301140E-02
    3818 6S   76   THR  HG23    3   0.900000E-01   1.00800           0   0.00000     -0.301140E-02
    3819 6S   76   THR  C      20   0.510000       12.0110           0   0.00000     -0.301140E-02
    3820 6S   76   THR  O      70  -0.510000       15.9990           0   0.00000     -0.301140E-02
    3821 6S   77   ASN  N      54  -0.470000       14.0070           0   0.00000     -0.301140E-02
    3822 6S   77   ASN  HN      1   0.310000       1.00800           0   0.00000     -0.301140E-02
    3823 6S   77   ASN  CA     22   0.700000E-01   12.0110           0   0.00000     -0.301140E-02
    3824 6S   77   ASN  HA      6   0.900000E-01   1.00800           0   0.00000     -0.301140E-02
    3825 6S   77   ASN  CB     23  -0.180000       12.0110           0   0.00000     -0.301140E-02
    3826 6S   77   ASN  HB1     3   0.900000E-01   1.00800           0   0.00000     -0.301140E-02
    3827 6S   77   ASN  HB2     3   0.900000E-01   1.00800           0   0.00000     -0.301140E-02
    3828 6S   77   ASN  CG     32   0.550000       12.0110           0   0.00000     -0.301140E-02
    3829 6S   77   ASN  OD1    70  -0.550000       15.9990           0   0.00000     -0.301140E-02
    3830 6S   77   ASN  ND2    55  -0.620000       14.0070           0   0.00000     -0.301140E-02
    3831 6S   77   ASN  HD21    1   0.320000       1.00800           0   0.00000     -0.301140E-02
    3832 6S   77   ASN  HD22    1   0.300000       1.00800           0   0.00000     -0.301140E-02
    3833 6S   77   ASN  C      20   0.510000       12.0110           0   0.00000     -0.301140E-02
    3834 6S   77   ASN  O      70  -0.510000       15.9990           0   0.00000     -0.301140E-02
    3835 6S   78   SER  N      54  -0.470000       14.0070           0   0.00000     -0.301140E-02
    3836 6S   78   SER  HN      1   0.310000       1.00800           0   0.00000     -0.301140E-02
    3837 6S   78   SER  CA     22   0.700000E-01   12.0110           0   0.00000     -0.301140E-02
    3838 6S   78   SER  HA      6   0.900000E-01   1.00800           0   0.00000     -0.301140E-02
    3839 6S   78   SER  CB     23   0.500000E-01   12.0110           0   0.00000     -0.301140E-02
    3840 6S   78   SER  HB1     3   0.900000E-01   1.00800           0   0.00000     -0.301140E-02
    3841 6S   78   SER  HB2     3   0.900000E-01   1.00800           0   0.00000     -0.301140E-02
    3842 6S   78   SER  OG     73  -0.660000       15.9990           0   0.00000     -0.301140E-02
    3843 6S   78   SER  HG1     1   0.430000       1.00800           0   0.00000     -0.301140E-02
    3844 6S   78   SER  C      20   0.510000       12.0110           0   0.00000     -0.301140E-02
    3845 6S   78   SER  O      70  -0.510000       15.9990           0   0.00000     -0.301140E-02
    3846 6S   79   SER  N      54  -0.470000       14.0070           0   0.00000     -0.301140E-02
    3847 6S   79   SER  HN      1   0.310000       1.00800           0   0.00000     -0.301140E-02
    3848 6S   79   SER  CA     22   0.700000E-01   12.0110           0   0.00000     -0.301140E-02
    3849 6S   79   SER  HA      6   0.900000E-01   1.00800           0   0.00000     -0.301140E-02
    3850 6S   79   SER  CB     23   0.500000E-01   12.0110           0   0.00000     -0.301140E-02
    3851 6S   79   SER  HB1     3   0.900000E-01   1.00800           0   0.00000     -0.301140E-02
    3852 6S   79   SER  HB2     3   0.900000E-01   1.00800           0   0.00000     -0.301140E-02
    3853 6S   79   SER  OG     73  -0.660000       15.9990           0   0.00000     -0.301140E-02
    3854 6S   79   SER  HG1     1   0.430000       1.00800           0   0.00000     -0.301140E-02
    3855 6S   79   SER  C      20   0.510000       12.0110           0   0.00000     -0.301140E-02
    3856 6S   79   SER  O      70  -0.510000       15.9990           0   0.00000     -0.301140E-02
    3857 6S   80   PRO  N      50  -0.290000       14.0070           0   0.00000     -0.301140E-02
    3858 6S   80   PRO  CD     31    0.00000       12.0110           0   0.00000     -0.301140E-02
    3859 6S   80   PRO  HD1     3   0.900000E-01   1.00800           0   0.00000     -0.301140E-02
    3860 6S   80   PRO  HD2     3   0.900000E-01   1.00800           0   0.00000     -0.301140E-02
    3861 6S   80   PRO  CA     29   0.200000E-01   12.0110           0   0.00000     -0.301140E-02
    3862 6S   80   PRO  HA      6   0.900000E-01   1.00800           0   0.00000     -0.301140E-02
    3863 6S   80   PRO  CB     30  -0.180000       12.0110           0   0.00000     -0.301140E-02
    3864 6S   80   PRO  HB1     3   0.900000E-01   1.00800           0   0.00000     -0.301140E-02
    3865 6S   80   PRO  HB2     3   0.900000E-01   1.00800           0   0.00000     -0.301140E-02
    3866 6S   80   PRO  CG     30  -0.180000       12.0110           0   0.00000     -0.301140E-02
    3867 6S   80   PRO  HG1     3   0.900000E-01   1.00800           0   0.00000     -0.301140E-02
    3868 6S   80   PRO  HG2     3   0.900000E-01   1.00800           0   0.00000     -0.301140E-02
    3869 6S   80   PRO  C      20   0.510000       12.0110           0   0.00000     -0.301140E-02
    3870 6S   80   PRO  O      70  -0.510000       15.9990           0   0.00000     -0.301140E-02
    3871 6S   81   ASP  N      54  -0.470000       14.0070           0   0.00000     -0.301140E-02
    3872 6S   81   ASP  HN      1   0.310000       1.00800           0   0.00000     -0.301140E-02
    3873 6S   81   ASP  CA     22   0.700000E-01   12.0110           0   0.00000     -0.301140E-02
    3874 6S   81   ASP  HA      6   0.900000E-01   1.00800           0   0.00000     -0.301140E-02
    3875 6S   81   ASP  CB     23  -0.280000       12.0110           0   0.00000     -0.301140E-02
    3876 6S   81   ASP  HB1     3   0.900000E-01   1.00800           0   0.00000     -0.301140E-02
    3877 6S   81   ASP  HB2     3   0.900000E-01   1.00800           0   0.00000     -0.301140E-02
    3878 6S   81   ASP  CG     32   0.620000       12.0110           0   0.00000     -0.301140E-02
    3879 6S   81   ASP  OD1    72  -0.760000       15.9990           0   0.00000     -0.301140E-02
    3880 6S   81   ASP  OD2    72  -0.760000       15.9990           0   0.00000     -0.301140E-02
    3881 6S   81   ASP  C      20   0.510000       12.0110           0   0.00000     -0.301140E-02
    3882 6S   81   ASP  O      70  -0.510000       15.9990           0   0.00000     -0.301140E-02
    3883 6S   82   ASP  N      54  -0.470000       14.0070           0   0.00000     -0.301140E-02
    3884 6S   82   ASP  HN      1   0.310000       1.00800           0   0.00000     -0.301140E-02
    3885 6S   82   ASP  CA     22   0.700000E-01   12.0110           0   0.00000     -0.301140E-02
    3886 6S   82   ASP  HA      6   0.900000E-01   1.00800           0   0.00000     -0.301140E-02
    3887 6S   82   ASP  CB     23  -0.280000       12.0110           0   0.00000     -0.301140E-02
    3888 6S   82   ASP  HB1     3   0.900000E-01   1.00800           0   0.00000     -0.301140E-02
    3889 6S   82   ASP  HB2     3   0.900000E-01   1.00800           0   0.00000     -0.301140E-02
    3890 6S   82   ASP  CG     32   0.620000       12.0110           0   0.00000     -0.301140E-02
    3891 6S   82   ASP  OD1    72  -0.760000       15.9990           0   0.00000     -0.301140E-02
    3892 6S   82   ASP  OD2    72  -0.760000       15.9990           0   0.00000     -0.301140E-02
    3893 6S   82   ASP  C      20   0.510000       12.0110           0   0.00000     -0.301140E-02
    3894 6S   82   ASP  O      70  -0.510000       15.9990           0   0.00000     -0.301140E-02
    3895 6S   83   GLN  N      54  -0.470000       14.0070           0   0.00000     -0.301140E-02
    3896 6S   83   GLN  HN      1   0.310000       1.00800           0   0.00000     -0.301140E-02
    3897 6S   83   GLN  CA     22   0.700000E-01   12.0110           0   0.00000     -0.301140E-02
    3898 6S   83   GLN  HA      6   0.900000E-01   1.00800           0   0.00000     -0.301140E-02
    3899 6S   83   GLN  CB     23  -0.180000       12.0110           0   0.00000     -0.301140E-02
    3900 6S   83   GLN  HB1     3   0.900000E-01   1.00800           0   0.00000     -0.301140E-02
    3901 6S   83   GLN  HB2     3   0.900000E-01   1.00800           0   0.00000     -0.301140E-02
    3902 6S   83   GLN  CG     23  -0.180000       12.0110           0   0.00000     -0.301140E-02
    3903 6S   83   GLN  HG1     3   0.900000E-01   1.00800           0   0.00000     -0.301140E-02
    3904 6S   83   GLN  HG2     3   0.900000E-01   1.00800           0   0.00000     -0.301140E-02
    3905 6S   83   GLN  CD     32   0.550000       12.0110           0   0.00000     -0.301140E-02
    3906 6S   83   GLN  OE1    70  -0.550000       15.9990           0   0.00000     -0.301140E-02
    3907 6S   83   GLN  NE2    55  -0.620000       14.0070           0   0.00000     -0.301140E-02
    3908 6S   83   GLN  HE21    1   0.320000       1.00800           0   0.00000     -0.301140E-02
    3909 6S   83   GLN  HE22    1   0.300000       1.00800           0   0.00000     -0.301140E-02
    3910 6S   83   GLN  C      20   0.510000       12.0110           0   0.00000     -0.301140E-02
    3911 6S   83   GLN  O      70  -0.510000       15.9990           0   0.00000     -0.301140E-02
    3912 6S   84   ILE  N      54  -0.470000       14.0070           0   0.00000     -0.301140E-02
    3913 6S   84   ILE  HN      1   0.310000       1.00800           0   0.00000     -0.301140E-02
    3914 6S   84   ILE  CA     22   0.700000E-01   12.0110           0   0.00000     -0.301140E-02
    3915 6S   84   ILE  HA      6   0.900000E-01   1.00800           0   0.00000     -0.301140E-02
    3916 6S   84   ILE  CB     22  -0.900000E-01   12.0110           0   0.00000     -0.301140E-02
    3917 6S   84   ILE  HB      3   0.900000E-01   1.00800           0   0.00000     -0.301140E-02
    3918 6S   84   ILE  CG2    24  -0.270000       12.0110           0   0.00000     -0.301140E-02
    3919 6S   84   ILE  HG21    3   0.900000E-01   1.00800           0   0.00000     -0.301140E-02
    3920 6S   84   ILE  HG22    3   0.900000E-01   1.00800           0   0.00000     -0.301140E-02
    3921 6S   84   ILE  HG23    3   0.900000E-01   1.00800           0   0.00000     -0.301140E-02
    3922 6S   84   ILE  CG1    23  -0.180000       12.0110           0   0.00000     -0.301140E-02
    3923 6S   84   ILE  HG11    3   0.900000E-01   1.00800           0   0.00000     -0.301140E-02
    3924 6S   84   ILE  HG12    3   0.900000E-01   1.00800           0   0.00000     -0.301140E-02
    3925 6S   84   ILE  CD     24  -0.270000       12.0110           0   0.00000     -0.301140E-02
    3926 6S   84   ILE  HD1     3   0.900000E-01   1.00800           0   0.00000     -0.301140E-02
    3927 6S   84   ILE  HD2     3   0.900000E-01   1.00800           0   0.00000     -0.301140E-02
    3928 6S   84   ILE  HD3     3   0.900000E-01   1.00800           0   0.00000     -0.301140E-02
    3929 6S   84   ILE  C      20   0.510000       12.0110           0   0.00000     -0.301140E-02
    3930 6S   84   ILE  O      70  -0.510000       15.9990           0   0.00000     -0.301140E-02
    3931 6S   85   GLY  N      54  -0.470000       14.0070           0   0.00000     -0.301140E-02
    3932 6S   85   GLY  HN      1   0.310000       1.00800           0   0.00000     -0.301140E-02
    3933 6S   85   GLY  CA     23  -0.200000E-01   12.0110           0   0.00000     -0.301140E-02
    3934 6S   85   GLY  HA1     6   0.900000E-01   1.00800           0   0.00000     -0.301140E-02
    3935 6S   85   GLY  HA2     6   0.900000E-01   1.00800           0   0.00000     -0.301140E-02
    3936 6S   85   GLY  C      20   0.510000       12.0110           0   0.00000     -0.301140E-02
    3937 6S   85   GLY  O      70  -0.510000       15.9990           0   0.00000     -0.301140E-02
    3938 6S   86   TYR  N      54  -0.470000       14.0070           0   0.00000     -0.301140E-02
    3939 6S   86   TYR  HN      1   0.310000       1.00800           0   0.00000     -0.301140E-02
    3940 6S   86   TYR  CA     22   0.700000E-01   12.0110           0   0.00000     -0.301140E-02
    3941 6S   86   TYR  HA      6   0.900000E-01   1.00800           0   0.00000     -0.301140E-02
    3942 6S   86   TYR  CB     23  -0.180000       12.0110           0   0.00000     -0.301140E-02
    3943 6S   86   TYR  HB1     3   0.900000E-01   1.00800           0   0.00000     -0.301140E-02
    3944 6S   86   TYR  HB2     3   0.900000E-01   1.00800           0   0.00000     -0.301140E-02
    3945 6S   86   TYR  CG     21    0.00000       12.0110           0   0.00000     -0.301140E-02
    3946 6S   86   TYR  CD1    21  -0.115000       12.0110           0   0.00000     -0.301140E-02
    3947 6S   86   TYR  HD1     5   0.115000       1.00800           0   0.00000     -0.301140E-02
    3948 6S   86   TYR  CE1    21  -0.115000       12.0110           0   0.00000     -0.301140E-02
    3949 6S   86   TYR  HE1     5   0.115000       1.00800           0   0.00000     -0.301140E-02
    3950 6S   86   TYR  CZ     21   0.110000       12.0110           0   0.00000     -0.301140E-02
    3951 6S   86   TYR  OH     73  -0.540000       15.9990           0   0.00000     -0.301140E-02
    3952 6S   86   TYR  HH      1   0.430000       1.00800           0   0.00000     -0.301140E-02
    3953 6S   86   TYR  CD2    21  -0.115000       12.0110           0   0.00000     -0.301140E-02
    3954 6S   86   TYR  HD2     5   0.115000       1.00800           0   0.00000     -0.301140E-02
    3955 6S   86   TYR  CE2    21  -0.115000       12.0110           0   0.00000     -0.301140E-02
    3956 6S   86   TYR  HE2     5   0.115000       1.00800           0   0.00000     -0.301140E-02
    3957 6S   86   TYR  C      20   0.510000       12.0110           0   0.00000     -0.301140E-02
    3958 6S   86   TYR  O      70  -0.510000       15.9990           0   0.00000     -0.301140E-02
    3959 6S   87   TYR  N      54  -0.470000       14.0070           0   0.00000     -0.301140E-02
    3960 6S   87   TYR  HN      1   0.310000       1.00800           0   0.00000     -0.301140E-02
    3961 6S   87   TYR  CA     22   0.700000E-01   12.0110           0   0.00000     -0.301140E-02
    3962 6S   87   TYR  HA      6   0.900000E-01   1.00800           0   0.00000     -0.301140E-02
    3963 6S   87   TYR  CB     23  -0.180000       12.0110           0   0.00000     -0.301140E-02
    3964 6S   87   TYR  HB1     3   0.900000E-01   1.00800           0   0.00000     -0.301140E-02
    3965 6S   87   TYR  HB2     3   0.900000E-01   1.00800           0   0.00000     -0.301140E-02
    3966 6S   87   TYR  CG     21    0.00000       12.0110           0   0.00000     -0.301140E-02
    3967 6S   87   TYR  CD1    21  -0.115000       12.0110           0   0.00000     -0.301140E-02
    3968 6S   87   TYR  HD1     5   0.115000       1.00800           0   0.00000     -0.301140E-02
    3969 6S   87   TYR  CE1    21  -0.115000       12.0110           0   0.00000     -0.301140E-02
    3970 6S   87   TYR  HE1     5   0.115000       1.00800           0   0.00000     -0.301140E-02
    3971 6S   87   TYR  CZ     21   0.110000       12.0110           0   0.00000     -0.301140E-02
    3972 6S   87   TYR  OH     73  -0.540000       15.9990           0   0.00000     -0.301140E-02
    3973 6S   87   TYR  HH      1   0.430000       1.00800           0   0.00000     -0.301140E-02
    3974 6S   87   TYR  CD2    21  -0.115000       12.0110           0   0.00000     -0.301140E-02
    3975 6S   87   TYR  HD2     5   0.115000       1.00800           0   0.00000     -0.301140E-02
    3976 6S   87   TYR  CE2    21  -0.115000       12.0110           0   0.00000     -0.301140E-02
    3977 6S   87   TYR  HE2     5   0.115000       1.00800           0   0.00000     -0.301140E-02
    3978 6S   87   TYR  C      20   0.510000       12.0110           0   0.00000     -0.301140E-02
    3979 6S   87   TYR  O      70  -0.510000       15.9990           0   0.00000     -0.301140E-02
    3980 6S   88   ARG  N      54  -0.470000       14.0070           0   0.00000     -0.301140E-02
    3981 6S   88   ARG  HN      1   0.310000       1.00800           0   0.00000     -0.301140E-02
    3982 6S   88   ARG  CA     22   0.700000E-01   12.0110           0   0.00000     -0.301140E-02
    3983 6S   88   ARG  HA      6   0.900000E-01   1.00800           0   0.00000     -0.301140E-02
    3984 6S   88   ARG  CB     23  -0.180000       12.0110           0   0.00000     -0.301140E-02
    3985 6S   88   ARG  HB1     3   0.900000E-01   1.00800           0   0.00000     -0.301140E-02
    3986 6S   88   ARG  HB2     3   0.900000E-01   1.00800           0   0.00000     -0.301140E-02
    3987 6S   88   ARG  CG     23  -0.180000       12.0110           0   0.00000     -0.301140E-02
    3988 6S   88   ARG  HG1     3   0.900000E-01   1.00800           0   0.00000     -0.301140E-02
    3989 6S   88   ARG  HG2     3   0.900000E-01   1.00800           0   0.00000     -0.301140E-02
    3990 6S   88   ARG  CD     23   0.200000       12.0110           0   0.00000     -0.301140E-02
    3991 6S   88   ARG  HD1     3   0.900000E-01   1.00800           0   0.00000     -0.301140E-02
    3992 6S   88   ARG  HD2     3   0.900000E-01   1.00800           0   0.00000     -0.301140E-02
    3993 6S   88   ARG  NE     57  -0.700000       14.0070           0   0.00000     -0.301140E-02
    3994 6S   88   ARG  HE      2   0.440000       1.00800           0   0.00000     -0.301140E-02
    3995 6S   88   ARG  CZ     20   0.640000       12.0110           0   0.00000     -0.301140E-02
    3996 6S   88   ARG  NH1    57  -0.800000       14.0070           0   0.00000     -0.301140E-02
    3997 6S   88   ARG  HH11    2   0.460000       1.00800           0   0.00000     -0.301140E-02
    3998 6S   88   ARG  HH12    2   0.460000       1.00800           0   0.00000     -0.301140E-02
    3999 6S   88   ARG  NH2    57  -0.800000       14.0070           0   0.00000     -0.301140E-02
    4000 6S   88   ARG  HH21    2   0.460000       1.00800           0   0.00000     -0.301140E-02
    4001 6S   88   ARG  HH22    2   0.460000       1.00800           0   0.00000     -0.301140E-02
    4002 6S   88   ARG  C      20   0.510000       12.0110           0   0.00000     -0.301140E-02
    4003 6S   88   ARG  O      70  -0.510000       15.9990           0   0.00000     -0.301140E-02
    4004 6S   89   ARG  N      54  -0.470000       14.0070           0   0.00000     -0.301140E-02
    4005 6S   89   ARG  HN      1   0.310000       1.00800           0   0.00000     -0.301140E-02
    4006 6S   89   ARG  CA     22   0.700000E-01   12.0110           0   0.00000     -0.301140E-02
    4007 6S   89   ARG  HA      6   0.900000E-01   1.00800           0   0.00000     -0.301140E-02
    4008 6S   89   ARG  CB     23  -0.180000       12.0110           0   0.00000     -0.301140E-02
    4009 6S   89   ARG  HB1     3   0.900000E-01   1.00800           0   0.00000     -0.301140E-02
    4010 6S   89   ARG  HB2     3   0.900000E-01   1.00800           0   0.00000     -0.301140E-02
    4011 6S   89   ARG  CG     23  -0.180000       12.0110           0   0.00000     -0.301140E-02
    4012 6S   89   ARG  HG1     3   0.900000E-01   1.00800           0   0.00000     -0.301140E-02
    4013 6S   89   ARG  HG2     3   0.900000E-01   1.00800           0   0.00000     -0.301140E-02
    4014 6S   89   ARG  CD     23   0.200000       12.0110           0   0.00000     -0.301140E-02
    4015 6S   89   ARG  HD1     3   0.900000E-01   1.00800           0   0.00000     -0.301140E-02
    4016 6S   89   ARG  HD2     3   0.900000E-01   1.00800           0   0.00000     -0.301140E-02
    4017 6S   89   ARG  NE     57  -0.700000       14.0070           0   0.00000     -0.301140E-02
    4018 6S   89   ARG  HE      2   0.440000       1.00800           0   0.00000     -0.301140E-02
    4019 6S   89   ARG  CZ     20   0.640000       12.0110           0   0.00000     -0.301140E-02
    4020 6S   89   ARG  NH1    57  -0.800000       14.0070           0   0.00000     -0.301140E-02
    4021 6S   89   ARG  HH11    2   0.460000       1.00800           0   0.00000     -0.301140E-02
    4022 6S   89   ARG  HH12    2   0.460000       1.00800           0   0.00000     -0.301140E-02
    4023 6S   89   ARG  NH2    57  -0.800000       14.0070           0   0.00000     -0.301140E-02
    4024 6S   89   ARG  HH21    2   0.460000       1.00800           0   0.00000     -0.301140E-02
    4025 6S   89   ARG  HH22    2   0.460000       1.00800           0   0.00000     -0.301140E-02
    4026 6S   89   ARG  C      20   0.510000       12.0110           0   0.00000     -0.301140E-02
    4027 6S   89   ARG  O      70  -0.510000       15.9990           0   0.00000     -0.301140E-02
    4028 6S   90   ALA  N      54  -0.470000       14.0070           0   0.00000     -0.301140E-02
    4029 6S   90   ALA  HN      1   0.310000       1.00800           0   0.00000     -0.301140E-02
    4030 6S   90   ALA  CA     22   0.700000E-01   12.0110           0   0.00000     -0.301140E-02
    4031 6S   90   ALA  HA      6   0.900000E-01   1.00800           0   0.00000     -0.301140E-02
    4032 6S   90   ALA  CB     24  -0.270000       12.0110           0   0.00000     -0.301140E-02
    4033 6S   90   ALA  HB1     3   0.900000E-01   1.00800           0   0.00000     -0.301140E-02
    4034 6S   90   ALA  HB2     3   0.900000E-01   1.00800           0   0.00000     -0.301140E-02
    4035 6S   90   ALA  HB3     3   0.900000E-01   1.00800           0   0.00000     -0.301140E-02
    4036 6S   90   ALA  C      20   0.510000       12.0110           0   0.00000     -0.301140E-02
    4037 6S   90   ALA  O      70  -0.510000       15.9990           0   0.00000     -0.301140E-02
    4038 6S   91   THR  N      54  -0.470000       14.0070           0   0.00000     -0.301140E-02
[truncated: 1,594,433 more chars]
