# Supplementary material for: Genetic Uniformity of a Specific Region in SARS-CoV-2 Genome and In-Silico Target-Oriented Repurposing of N-Acetyl-D-Glucosamine
Source: Preprints.org preprint supplement (doi:10.20944/preprints202005.0397.v1), 2020-05-24
Supplement: Supplementary file 7 [file supplementary › S7 File/eadock3.err]

sib.fastconf.EADock3: running @ selenium/127.0.1.1 development version. /home/swissdock/swissdock/tmp//cache/eadock3/eadock3.jar MD5: 6b55cadf59de6f950f604b9d6d6562d2
sib.fastconf.EADock3: 5000 binding modes will be generated
sib.fastconf.EADock3: the 5000 with the most favorable SimpleFitness will be evaluated with FACTS.
sib.fastconf.EADock3: 250 binding modes will be retained
sib.fastconf.EADock3: minimize with 100 steps of SD then 250 steps of ABNR
sib.fastconf.EADock3: side chains closer than 0.0 A to any atom of the ligand will be optimized.
sib.fastconf.EADock3: Clustering radius is 2.0
sib.fastconf.EADock3: Maximum cluster size is 8
sib.fastconf.EADock3: clusters will have the exact size.
sib.fastconf.EADock3: Output file is clusters.zip
sib.fastconf.EADock3: Ligand selection is SEGID LIG
sib.fastconf.EADock3: temporary files will be kept.
sib.fastconf.EADock3: Translations allowed.
sib.fastconf.EADock3: solvation model is FACTS
sib.fastconf.EADock3: Centering rotations on the whole ligand.
sib.fastconf.EADock3: System  : 7163 atoms
sib.fastconf.EADock3: Ligand  : 30 atoms
sib.fastconf.EADock3: Receptor: 7133 atoms
sib.fastconf.EADock3:   Fixed part   : 7133 atoms
sib.fastconf.EADock3:   Flexible part: 0 atoms
sib.fastconf.EADock3: Blind docking
sib.fastconf.biodatastructures.molecules.FlexibleMoleculeBuilder: No RotateBond directive found.
sib.fastconf.biodatastructures.molecules.FlexibleMoleculeBuilder: Multiple keyword found in RotateBond directive.
sib.fastconf.biodatastructures.molecules.FlexibleMoleculeBuilder: Identify bonds.
sib.fastconf.biodatastructures.molecules.FlexibleMolecule: Total of 29 bonds found.
sib.fastconf.biodatastructures.molecules.FlexibleMolecule: Restricting dihedral rotations based on the number of atom on each side.
sib.fastconf.biodatastructures.molecules.FlexibleMolecule: 12 rotatable dihedral angles found.
sib.fastconf.biodatastructures.molecules.FlexibleMolecule: no user specified bond list.
sib.fastconf.biodatastructures.molecules.FlexibleMolecule: Filtering out dihedrals defined with an hydrogen.
sib.fastconf.biodatastructures.molecules.FlexibleMolecule: accepting bond 7138_7137_7135_7134
sib.fastconf.biodatastructures.molecules.FlexibleMolecule: accepting bond 7139_7138_7137_7135
sib.fastconf.biodatastructures.molecules.FlexibleMolecule: accepting bond 7137_7138_7139_7140
sib.fastconf.biodatastructures.molecules.FlexibleMolecule: accepting bond 7142_7141_7138_7137
sib.fastconf.biodatastructures.molecules.FlexibleMolecule: accepting bond 7138_7141_7142_7143
sib.fastconf.biodatastructures.molecules.FlexibleMolecule: accepting bond 7141_7142_7143_7144
sib.fastconf.biodatastructures.molecules.FlexibleMolecule: accepting bond 7142_7143_7144_7145
sib.fastconf.biodatastructures.molecules.FlexibleMolecule: found # 6 core atoms : [ 7138 7141 7142 7148 7155 7163 ]
sib.fastconf.biodatastructures.molecules.FlexibleMolecule: found rotatable bond # 0 between 7137 7135
sib.fastconf.biodatastructures.molecules.FlexibleMolecule: Group FIX (23): [ 7138 7152 7139 7141 7153 7140 7154 7142 7148 7155 7143 7147 7156 7144 7146 7157 7145 7158 7159 7160 7161 7162 7163 ] 
sib.fastconf.biodatastructures.molecules.FlexibleMolecule: Group ROTATABLE (5): [ 7134 7149 7150 7151 7136 ] 
sib.fastconf.biodatastructures.molecules.FlexibleMolecule: Group ROTATABLE (Validation) (2): [ 7134 7136 ] 
sib.fastconf.biodatastructures.molecules.FlexibleMolecule: Group ROTATABLE (Non Validation) (0): [ ] 
sib.fastconf.biodatastructures.molecules.FlexibleMolecule: found rotatable bond # 1 between 7138 7137
sib.fastconf.biodatastructures.molecules.FlexibleMolecule: Group FIX (21): [ 7139 7141 7153 7140 7154 7142 7148 7155 7143 7147 7156 7144 7146 7157 7145 7158 7159 7160 7161 7162 7163 ] 
sib.fastconf.biodatastructures.molecules.FlexibleMolecule: Group ROTATABLE (7): [ 7134 7135 7149 7150 7151 7136 7152 ] 
sib.fastconf.biodatastructures.molecules.FlexibleMolecule: Group ROTATABLE (Validation) (1): [ 7135 ] 
sib.fastconf.biodatastructures.molecules.FlexibleMolecule: Group ROTATABLE (Non Validation) (5): [ 7134 7149 7150 7151 7136 ] 
sib.fastconf.biodatastructures.molecules.FlexibleMolecule: found rotatable bond # 2 between 7138 7139
sib.fastconf.biodatastructures.molecules.FlexibleMolecule: Group FIX (26): [ 7134 7135 7149 7150 7151 7136 7137 7152 7141 7153 7142 7148 7155 7143 7147 7156 7163 7144 7146 7157 7162 7145 7158 7159 7161 7160 ] 
sib.fastconf.biodatastructures.molecules.FlexibleMolecule: Group ROTATABLE (2): [ 7140 7154 ] 
sib.fastconf.biodatastructures.molecules.FlexibleMolecule: Group ROTATABLE (Validation) (1): [ 7140 ] 
sib.fastconf.biodatastructures.molecules.FlexibleMolecule: Group ROTATABLE (Non Validation) (0): [ ] 
sib.fastconf.biodatastructures.molecules.FlexibleMolecule: found rotatable bond # 3 between 7141 7138
sib.fastconf.biodatastructures.molecules.FlexibleMolecule: Group FIX (16): [ 7142 7148 7155 7143 7147 7156 7144 7146 7157 7145 7158 7159 7160 7161 7162 7163 ] 
sib.fastconf.biodatastructures.molecules.FlexibleMolecule: Group ROTATABLE (12): [ 7134 7135 7149 7150 7151 7136 7137 7152 7139 7153 7140 7154 ] 
sib.fastconf.biodatastructures.molecules.FlexibleMolecule: Group ROTATABLE (Validation) (2): [ 7137 7139 ] 
sib.fastconf.biodatastructures.molecules.FlexibleMolecule: Group ROTATABLE (Non Validation) (9): [ 7134 7135 7149 7150 7151 7136 7152 7140 7154 ] 
sib.fastconf.biodatastructures.molecules.FlexibleMolecule: found rotatable bond # 4 between 7141 7142
sib.fastconf.biodatastructures.molecules.FlexibleMolecule: Group FIX (16): [ 7134 7135 7149 7150 7151 7136 7137 7138 7152 7139 7153 7140 7154 7148 7155 7163 ] 
sib.fastconf.biodatastructures.molecules.FlexibleMolecule: Group ROTATABLE (12): [ 7143 7147 7156 7144 7146 7157 7145 7158 7159 7160 7161 7162 ] 
sib.fastconf.biodatastructures.molecules.FlexibleMolecule: Group ROTATABLE (Validation) (2): [ 7143 7147 ] 
sib.fastconf.biodatastructures.molecules.FlexibleMolecule: Group ROTATABLE (Non Validation) (8): [ 7144 7146 7157 7145 7158 7159 7160 7161 ] 
sib.fastconf.biodatastructures.molecules.FlexibleMolecule: found rotatable bond # 5 between 7142 7143
sib.fastconf.biodatastructures.molecules.FlexibleMolecule: Group FIX (20): [ 7134 7135 7149 7150 7151 7136 7137 7138 7152 7139 7141 7153 7140 7154 7148 7155 7147 7156 7163 7162 ] 
sib.fastconf.biodatastructures.molecules.FlexibleMolecule: Group ROTATABLE (8): [ 7144 7146 7157 7145 7158 7159 7160 7161 ] 
sib.fastconf.biodatastructures.molecules.FlexibleMolecule: Group ROTATABLE (Validation) (2): [ 7144 7146 ] 
sib.fastconf.biodatastructures.molecules.FlexibleMolecule: Group ROTATABLE (Non Validation) (4): [ 7145 7158 7159 7160 ] 
sib.fastconf.biodatastructures.molecules.FlexibleMolecule: found rotatable bond # 6 between 7143 7144
sib.fastconf.biodatastructures.molecules.FlexibleMolecule: Group FIX (24): [ 7134 7135 7149 7150 7151 7136 7137 7138 7152 7139 7141 7153 7140 7154 7142 7148 7155 7147 7156 7163 7146 7157 7162 7161 ] 
sib.fastconf.biodatastructures.molecules.FlexibleMolecule: Group ROTATABLE (4): [ 7145 7158 7159 7160 ] 
sib.fastconf.biodatastructures.molecules.FlexibleMolecule: Group ROTATABLE (Validation) (1): [ 7145 ] 
sib.fastconf.biodatastructures.molecules.FlexibleMolecule: Group ROTATABLE (Non Validation) (0): [ ] 
sib.fastconf.biodatastructures.molecules.FlexibleMolecule: Bond 7138 7139 has no parent, best bet is 7141 7138
sib.fastconf.biodatastructures.molecules.FlexibleMolecule: Bond 7141 7138 has no putative parent, best bet is root node
sib.fastconf.biodatastructures.molecules.FlexibleMolecule: Bond 7141 7142 has no putative parent, best bet is root node
sib.fastconf.biodatastructures.molecules.FlexibleMoleculeRotatable bond tree initialized 8 elements
sib.fastconf.biodatastructures.molecules.FlexibleMolecule: Detecting chiral carbons
sib.fastconf.biodatastructures.molecules.FlexibleMolecule: Atom 7138 C2   [ 1.158 -0.158 -0.681 ] is chiral
sib.fastconf.biodatastructures.molecules.FlexibleMolecule: Atom 7141 C4   [ -0.127 -0.268 0.161 ] is chiral
sib.fastconf.biodatastructures.molecules.FlexibleMolecule: Atom 7143 C6   [ -2.693 -0.458 0.084 ] is chiral
sib.fastconf.FastconfBuilder: Initialize non bonded list.
sib.fastconf.biodatastructures.scoring.moleculargrids.grids.InsideMolecularGrid: Calculating inside grid [388][528][505]
sib.fastconf.biodatastructures.scoring.moleculargrids.grids.InsideMolecularGrid: Inside grid calculated in 1300 ms
sib.fastconf.biodatastructures.scoring.moleculargrids.grids.InsideMolecularGrid: Smoothing inside grid.
sib.fastconf.biodatastructures.scoring.moleculargrids.grids.InsideMolecularGrid: Inside grid smoothed in 1420 ms
sib.fastconf.biodatastructures.scoring.EvaluatorBuilder: generation of the electrostatic grid took 10 ms.
sib.fastconf.FastconfBuilder: Initial energy: 1287.3092
sib.fastconf.EADock3: EADock3 starting
sib.fastconf.EADock3: Box volume 584995.8 ?
sib.fastconf.EADock3: Xmin: -29.059 Xmax: 38.386 Xsize: 67.445
sib.fastconf.EADock3: Ymin: -35.281 Ymax: 60.200 Ysize: 95.481
sib.fastconf.EADock3: Zmin: -18.610 Zmax: 72.233 Zsize: 90.842
sib.fastconf.EADock3: Calculating pocket bias.
sib.fastconf.EADock3: 14 cavities identified.
sib.fastconf.EADock3: 30 magic points identified.
sib.fastconf.EADock3: 30 pocket points were identified in 3810 ms
sib.fastconf.EADock3: Calculating surface bias.
sib.fastconf.EADock3: 14956 surface points were identified in 8340 ms
sib.fastconf.EADock3: 0.0 % done
sib.fastconf.EADock3: 0.1 % done
sib.fastconf.EADock3: 0.2 % done
sib.fastconf.EADock3: 0.3 % done
sib.fastconf.EADock3: 0.4 % done
sib.fastconf.EADock3: 0.5 % done
sib.fastconf.EADock3: 0.6 % done
sib.fastconf.EADock3: 0.7 % done
sib.fastconf.EADock3: 0.8 % done
sib.fastconf.EADock3: 0.9 % done
sib.fastconf.EADock3: 1.0 % done
sib.fastconf.EADock3: 1.1 % done
sib.fastconf.EADock3: 1.2 % done
sib.fastconf.EADock3: 1.3 % done
sib.fastconf.EADock3: 1.4 % done
sib.fastconf.EADock3: 1.5 % done
sib.fastconf.EADock3: 1.6 % done
sib.fastconf.EADock3: 1.7 % done
sib.fastconf.EADock3: 1.8 % done
sib.fastconf.EADock3: 1.9 % done
sib.fastconf.EADock3: 2.0 % done
sib.fastconf.EADock3: 2.1 % done
sib.fastconf.EADock3: 2.2 % done
sib.fastconf.EADock3: 2.3 % done
sib.fastconf.EADock3: 2.4 % done
sib.fastconf.EADock3: 2.5 % done
sib.fastconf.EADock3: 2.6 % done
sib.fastconf.EADock3: 2.7 % done
sib.fastconf.EADock3: 2.8 % done
sib.fastconf.EADock3: 2.9 % done
sib.fastconf.EADock3: 3.0 % done
sib.fastconf.EADock3: 3.1 % done
sib.fastconf.EADock3: 3.2 % done
sib.fastconf.EADock3: 3.3 % done
sib.fastconf.EADock3: 3.4 % done
sib.fastconf.EADock3: 3.5 % done
sib.fastconf.EADock3: 3.6 % done
sib.fastconf.EADock3: 3.7 % done
sib.fastconf.EADock3: 3.8 % done
sib.fastconf.EADock3: 3.9 % done
sib.fastconf.EADock3: 4.0 % done
sib.fastconf.EADock3: 4.1 % done
sib.fastconf.EADock3: 4.2 % done
sib.fastconf.EADock3: 4.3 % done
sib.fastconf.EADock3: 4.4 % done
sib.fastconf.EADock3: 4.5 % done
sib.fastconf.EADock3: 4.6 % done
sib.fastconf.EADock3: 4.7 % done
sib.fastconf.EADock3: 4.8 % done
sib.fastconf.EADock3: 4.9 % done
sib.fastconf.EADock3: 5.0 % done
sib.fastconf.EADock3: 5.1 % done
sib.fastconf.EADock3: 5.2 % done
sib.fastconf.EADock3: 5.3 % done
sib.fastconf.EADock3: 5.4 % done
sib.fastconf.EADock3: 5.5 % done
sib.fastconf.EADock3: 5.6 % done
sib.fastconf.EADock3: 5.7 % done
sib.fastconf.EADock3: 5.8 % done
sib.fastconf.EADock3: 5.9 % done
sib.fastconf.EADock3: 6.0 % done
sib.fastconf.EADock3: 6.1 % done
sib.fastconf.EADock3: 6.2 % done
sib.fastconf.EADock3: 6.3 % done
sib.fastconf.EADock3: 6.4 % done
sib.fastconf.EADock3: 6.5 % done
sib.fastconf.EADock3: 6.6 % done
sib.fastconf.EADock3: 6.7 % done
sib.fastconf.EADock3: 6.8 % done
sib.fastconf.EADock3: 6.9 % done
sib.fastconf.EADock3: 7.0 % done
sib.fastconf.EADock3: 7.1 % done
sib.fastconf.EADock3: 7.2 % done
sib.fastconf.EADock3: 7.3 % done
sib.fastconf.EADock3: 7.4 % done
sib.fastconf.EADock3: 7.5 % done
sib.fastconf.EADock3: 7.6 % done
sib.fastconf.EADock3: 7.7 % done
sib.fastconf.EADock3: 7.8 % done
sib.fastconf.EADock3: 7.9 % done
sib.fastconf.EADock3: 8.0 % done
sib.fastconf.EADock3: 8.1 % done
sib.fastconf.EADock3: 8.2 % done
sib.fastconf.EADock3: 8.3 % done
sib.fastconf.EADock3: 8.4 % done
sib.fastconf.EADock3: 8.5 % done
sib.fastconf.EADock3: 8.6 % done
sib.fastconf.EADock3: 8.7 % done
sib.fastconf.EADock3: 8.8 % done
sib.fastconf.EADock3: 8.9 % done
sib.fastconf.EADock3: 9.0 % done
sib.fastconf.EADock3: 9.1 % done
sib.fastconf.EADock3: 9.2 % done
sib.fastconf.EADock3: 9.3 % done
sib.fastconf.EADock3: 9.4 % done
sib.fastconf.EADock3: 9.5 % done
sib.fastconf.EADock3: 9.6 % done
sib.fastconf.EADock3: 9.7 % done
sib.fastconf.EADock3: 9.8 % done
sib.fastconf.EADock3: 9.9 % done
sib.fastconf.EADock3: 10.0 % done
sib.fastconf.EADock3: 10.1 % done
sib.fastconf.EADock3: 10.2 % done
sib.fastconf.EADock3: 10.3 % done
sib.fastconf.EADock3: 10.4 % done
sib.fastconf.EADock3: 10.5 % done
sib.fastconf.EADock3: 10.6 % done
sib.fastconf.EADock3: 10.7 % done
sib.fastconf.EADock3: 10.8 % done
sib.fastconf.EADock3: 10.9 % done
sib.fastconf.EADock3: 11.0 % done
sib.fastconf.EADock3: 11.1 % done
sib.fastconf.EADock3: 11.2 % done
sib.fastconf.EADock3: 11.3 % done
sib.fastconf.EADock3: 11.4 % done
sib.fastconf.EADock3: 11.5 % done
sib.fastconf.EADock3: 11.6 % done
sib.fastconf.EADock3: 11.7 % done
sib.fastconf.EADock3: 11.8 % done
sib.fastconf.EADock3: 11.9 % done
sib.fastconf.EADock3: 12.0 % done
sib.fastconf.EADock3: 12.1 % done
sib.fastconf.EADock3: 12.2 % done
sib.fastconf.EADock3: 12.3 % done
sib.fastconf.EADock3: 12.4 % done
sib.fastconf.EADock3: 12.5 % done
sib.fastconf.EADock3: 12.6 % done
sib.fastconf.EADock3: 12.7 % done
sib.fastconf.EADock3: 12.8 % done
sib.fastconf.EADock3: 12.9 % done
sib.fastconf.EADock3: 13.0 % done
sib.fastconf.EADock3: 13.1 % done
sib.fastconf.EADock3: 13.2 % done
sib.fastconf.EADock3: 13.3 % done
sib.fastconf.EADock3: 13.4 % done
sib.fastconf.EADock3: 13.5 % done
sib.fastconf.EADock3: 13.6 % done
sib.fastconf.EADock3: 13.7 % done
sib.fastconf.EADock3: 13.8 % done
sib.fastconf.EADock3: 13.9 % done
sib.fastconf.EADock3: 14.0 % done
sib.fastconf.EADock3: 14.1 % done
sib.fastconf.EADock3: 14.2 % done
sib.fastconf.EADock3: 14.3 % done
sib.fastconf.EADock3: 14.4 % done
sib.fastconf.EADock3: 14.5 % done
sib.fastconf.EADock3: 14.6 % done
sib.fastconf.EADock3: 14.7 % done
sib.fastconf.EADock3: 14.8 % done
sib.fastconf.EADock3: 14.9 % done
sib.fastconf.EADock3: 15.0 % done
sib.fastconf.EADock3: 15.1 % done
sib.fastconf.EADock3: 15.2 % done
sib.fastconf.EADock3: 15.3 % done
sib.fastconf.EADock3: 15.4 % done
sib.fastconf.EADock3: 15.5 % done
sib.fastconf.EADock3: 15.6 % done
sib.fastconf.EADock3: 15.7 % done
sib.fastconf.EADock3: 15.8 % done
sib.fastconf.EADock3: 15.9 % done
sib.fastconf.EADock3: 16.0 % done
sib.fastconf.EADock3: 16.1 % done
sib.fastconf.EADock3: 16.2 % done
sib.fastconf.EADock3: 16.3 % done
sib.fastconf.EADock3: 16.4 % done
sib.fastconf.EADock3: 16.5 % done
sib.fastconf.EADock3: 16.6 % done
sib.fastconf.EADock3: 16.7 % done
sib.fastconf.EADock3: 16.8 % done
sib.fastconf.EADock3: 16.9 % done
sib.fastconf.EADock3: 17.0 % done
sib.fastconf.EADock3: 17.1 % done
sib.fastconf.EADock3: 17.2 % done
sib.fastconf.EADock3: 17.3 % done
sib.fastconf.EADock3: 17.4 % done
sib.fastconf.EADock3: 17.5 % done
sib.fastconf.EADock3: 17.6 % done
sib.fastconf.EADock3: 17.7 % done
sib.fastconf.EADock3: 17.8 % done
sib.fastconf.EADock3: 17.9 % done
sib.fastconf.EADock3: 18.0 % done
sib.fastconf.EADock3: 18.1 % done
sib.fastconf.EADock3: 18.2 % done
sib.fastconf.EADock3: 18.3 % done
sib.fastconf.EADock3: 18.4 % done
sib.fastconf.EADock3: 18.5 % done
sib.fastconf.EADock3: 18.6 % done
sib.fastconf.EADock3: 18.7 % done
sib.fastconf.EADock3: 18.8 % done
sib.fastconf.EADock3: 18.9 % done
sib.fastconf.EADock3: 19.0 % done
sib.fastconf.EADock3: 19.1 % done
sib.fastconf.EADock3: 19.2 % done
sib.fastconf.EADock3: 19.3 % done
sib.fastconf.EADock3: 19.4 % done
sib.fastconf.EADock3: 19.5 % done
sib.fastconf.EADock3: 19.6 % done
sib.fastconf.EADock3: 19.7 % done
sib.fastconf.EADock3: 19.8 % done
sib.fastconf.EADock3: 19.9 % done
sib.fastconf.EADock3: 20.0 % done
sib.fastconf.EADock3: 20.1 % done
sib.fastconf.EADock3: 20.2 % done
sib.fastconf.EADock3: 20.3 % done
sib.fastconf.EADock3: 20.4 % done
sib.fastconf.EADock3: 20.5 % done
sib.fastconf.EADock3: 20.6 % done
sib.fastconf.EADock3: 20.7 % done
sib.fastconf.EADock3: 20.8 % done
sib.fastconf.EADock3: 20.9 % done
sib.fastconf.EADock3: 21.0 % done
sib.fastconf.EADock3: 21.1 % done
sib.fastconf.EADock3: 21.2 % done
sib.fastconf.EADock3: 21.3 % done
sib.fastconf.EADock3: 21.4 % done
sib.fastconf.EADock3: 21.5 % done
sib.fastconf.EADock3: 21.6 % done
sib.fastconf.EADock3: 21.7 % done
sib.fastconf.EADock3: 21.8 % done
sib.fastconf.EADock3: 21.9 % done
sib.fastconf.EADock3: 22.0 % done
sib.fastconf.EADock3: 22.1 % done
sib.fastconf.EADock3: 22.2 % done
sib.fastconf.EADock3: 22.3 % done
sib.fastconf.EADock3: 22.4 % done
sib.fastconf.EADock3: 22.5 % done
sib.fastconf.EADock3: 22.6 % done
sib.fastconf.EADock3: 22.7 % done
sib.fastconf.EADock3: 22.8 % done
sib.fastconf.EADock3: 22.9 % done
sib.fastconf.EADock3: 23.0 % done
sib.fastconf.EADock3: 23.1 % done
sib.fastconf.EADock3: 23.2 % done
sib.fastconf.EADock3: 23.3 % done
sib.fastconf.EADock3: 23.4 % done
sib.fastconf.EADock3: 23.5 % done
sib.fastconf.EADock3: 23.6 % done
sib.fastconf.EADock3: 23.7 % done
sib.fastconf.EADock3: 23.8 % done
sib.fastconf.EADock3: 23.9 % done
sib.fastconf.EADock3: 24.0 % done
sib.fastconf.EADock3: 24.1 % done
sib.fastconf.EADock3: 24.2 % done
sib.fastconf.EADock3: 24.3 % done
sib.fastconf.EADock3: 24.4 % done
sib.fastconf.EADock3: 24.5 % done
sib.fastconf.EADock3: 24.6 % done
sib.fastconf.EADock3: 24.7 % done
sib.fastconf.EADock3: 24.8 % done
sib.fastconf.EADock3: 24.9 % done
sib.fastconf.EADock3: 25.0 % done
sib.fastconf.EADock3: 25.1 % done
sib.fastconf.EADock3: 25.2 % done
sib.fastconf.EADock3: 25.3 % done
sib.fastconf.EADock3: 25.4 % done
sib.fastconf.EADock3: 25.5 % done
sib.fastconf.EADock3: 25.6 % done
sib.fastconf.EADock3: 25.7 % done
sib.fastconf.EADock3: 25.8 % done
sib.fastconf.EADock3: 25.9 % done
sib.fastconf.EADock3: 26.0 % done
sib.fastconf.EADock3: 26.1 % done
sib.fastconf.EADock3: 26.2 % done
sib.fastconf.EADock3: 26.3 % done
sib.fastconf.EADock3: 26.4 % done
sib.fastconf.EADock3: 26.5 % done
sib.fastconf.EADock3: 26.6 % done
sib.fastconf.EADock3: 26.7 % done
sib.fastconf.EADock3: 26.8 % done
sib.fastconf.EADock3: 26.9 % done
sib.fastconf.EADock3: 27.0 % done
sib.fastconf.EADock3: 27.1 % done
sib.fastconf.EADock3: 27.2 % done
sib.fastconf.EADock3: 27.3 % done
sib.fastconf.EADock3: 27.4 % done
sib.fastconf.EADock3: 27.5 % done
sib.fastconf.EADock3: 27.6 % done
sib.fastconf.EADock3: 27.7 % done
sib.fastconf.EADock3: 27.8 % done
sib.fastconf.EADock3: 27.9 % done
sib.fastconf.EADock3: 28.0 % done
sib.fastconf.EADock3: 28.1 % done
sib.fastconf.EADock3: 28.2 % done
sib.fastconf.EADock3: 28.3 % done
sib.fastconf.EADock3: 28.4 % done
sib.fastconf.EADock3: 28.5 % done
sib.fastconf.EADock3: 28.6 % done
sib.fastconf.EADock3: 28.7 % done
sib.fastconf.EADock3: 28.8 % done
sib.fastconf.EADock3: 28.9 % done
sib.fastconf.EADock3: 29.0 % done
sib.fastconf.EADock3: 29.1 % done
sib.fastconf.EADock3: 29.2 % done
sib.fastconf.EADock3: 29.3 % done
sib.fastconf.EADock3: 29.4 % done
sib.fastconf.EADock3: 29.5 % done
sib.fastconf.EADock3: 29.6 % done
sib.fastconf.EADock3: 29.7 % done
sib.fastconf.EADock3: 29.8 % done
sib.fastconf.EADock3: 29.9 % done
sib.fastconf.EADock3: 30.0 % done
sib.fastconf.EADock3: 30.1 % done
sib.fastconf.EADock3: 30.2 % done
sib.fastconf.EADock3: 30.3 % done
sib.fastconf.EADock3: 30.4 % done
sib.fastconf.EADock3: 30.5 % done
sib.fastconf.EADock3: 30.6 % done
sib.fastconf.EADock3: 30.7 % done
sib.fastconf.EADock3: 30.8 % done
sib.fastconf.EADock3: 30.9 % done
sib.fastconf.EADock3: 31.0 % done
sib.fastconf.EADock3: 31.1 % done
sib.fastconf.EADock3: 31.2 % done
sib.fastconf.EADock3: 31.3 % done
sib.fastconf.EADock3: 31.4 % done
sib.fastconf.EADock3: 31.5 % done
sib.fastconf.EADock3: 31.6 % done
sib.fastconf.EADock3: 31.7 % done
sib.fastconf.EADock3: 31.8 % done
sib.fastconf.EADock3: 31.9 % done
sib.fastconf.EADock3: 32.0 % done
sib.fastconf.EADock3: 32.1 % done
sib.fastconf.EADock3: 32.2 % done
sib.fastconf.EADock3: 32.3 % done
sib.fastconf.EADock3: 32.4 % done
sib.fastconf.EADock3: 32.5 % done
sib.fastconf.EADock3: 32.6 % done
sib.fastconf.EADock3: 32.7 % done
sib.fastconf.EADock3: 32.8 % done
sib.fastconf.EADock3: 32.9 % done
sib.fastconf.EADock3: 33.0 % done
sib.fastconf.EADock3: 33.1 % done
sib.fastconf.EADock3: 33.2 % done
sib.fastconf.EADock3: 33.3 % done
sib.fastconf.EADock3: 33.4 % done
sib.fastconf.EADock3: 33.5 % done
sib.fastconf.EADock3: 33.6 % done
sib.fastconf.EADock3: 33.7 % done
sib.fastconf.EADock3: 33.8 % done
sib.fastconf.EADock3: 33.9 % done
sib.fastconf.EADock3: 34.0 % done
sib.fastconf.EADock3: 34.1 % done
sib.fastconf.EADock3: 34.2 % done
sib.fastconf.EADock3: 34.3 % done
sib.fastconf.EADock3: 34.4 % done
sib.fastconf.EADock3: 34.5 % done
sib.fastconf.EADock3: 34.6 % done
sib.fastconf.EADock3: 34.7 % done
sib.fastconf.EADock3: 34.8 % done
sib.fastconf.EADock3: 34.9 % done
sib.fastconf.EADock3: 35.0 % done
sib.fastconf.EADock3: 35.1 % done
sib.fastconf.EADock3: 35.2 % done
sib.fastconf.EADock3: 35.3 % done
sib.fastconf.EADock3: 35.4 % done
sib.fastconf.EADock3: 35.5 % done
sib.fastconf.EADock3: 35.6 % done
sib.fastconf.EADock3: 35.7 % done
sib.fastconf.EADock3: 35.8 % done
sib.fastconf.EADock3: 35.9 % done
sib.fastconf.EADock3: 36.0 % done
sib.fastconf.EADock3: 36.1 % done
sib.fastconf.EADock3: 36.2 % done
sib.fastconf.EADock3: 36.3 % done
sib.fastconf.EADock3: 36.4 % done
sib.fastconf.EADock3: 36.5 % done
sib.fastconf.EADock3: 36.6 % done
sib.fastconf.EADock3: 36.7 % done
sib.fastconf.EADock3: 36.8 % done
sib.fastconf.EADock3: 36.9 % done
sib.fastconf.EADock3: 37.0 % done
sib.fastconf.EADock3: 37.1 % done
sib.fastconf.EADock3: 37.2 % done
sib.fastconf.EADock3: 37.3 % done
sib.fastconf.EADock3: 37.4 % done
sib.fastconf.EADock3: 37.5 % done
sib.fastconf.EADock3: 37.6 % done
sib.fastconf.EADock3: 37.7 % done
sib.fastconf.EADock3: 37.8 % done
sib.fastconf.EADock3: 37.9 % done
sib.fastconf.EADock3: 38.0 % done
sib.fastconf.EADock3: 38.1 % done
sib.fastconf.EADock3: 38.2 % done
sib.fastconf.EADock3: 38.3 % done
sib.fastconf.EADock3: 38.4 % done
sib.fastconf.EADock3: 38.5 % done
sib.fastconf.EADock3: 38.6 % done
sib.fastconf.EADock3: 38.7 % done
sib.fastconf.EADock3: 38.8 % done
sib.fastconf.EADock3: 38.9 % done
sib.fastconf.EADock3: 39.0 % done
sib.fastconf.EADock3: 39.1 % done
sib.fastconf.EADock3: 39.2 % done
sib.fastconf.EADock3: 39.3 % done
sib.fastconf.EADock3: 39.4 % done
sib.fastconf.EADock3: 39.5 % done
sib.fastconf.EADock3: 39.6 % done
sib.fastconf.EADock3: 39.7 % done
sib.fastconf.EADock3: 39.8 % done
sib.fastconf.EADock3: 39.9 % done
sib.fastconf.EADock3: 40.0 % done
sib.fastconf.EADock3: 40.1 % done
sib.fastconf.EADock3: 40.2 % done
sib.fastconf.EADock3: 40.3 % done
sib.fastconf.EADock3: 40.4 % done
sib.fastconf.EADock3: 40.5 % done
sib.fastconf.EADock3: 40.6 % done
sib.fastconf.EADock3: 40.7 % done
sib.fastconf.EADock3: 40.8 % done
sib.fastconf.EADock3: 40.9 % done
sib.fastconf.EADock3: 41.0 % done
sib.fastconf.EADock3: 41.1 % done
sib.fastconf.EADock3: 41.2 % done
sib.fastconf.EADock3: 41.3 % done
sib.fastconf.EADock3: 41.4 % done
sib.fastconf.EADock3: 41.5 % done
sib.fastconf.EADock3: 41.6 % done
sib.fastconf.EADock3: 41.7 % done
sib.fastconf.EADock3: 41.8 % done
sib.fastconf.EADock3: 41.9 % done
sib.fastconf.EADock3: 42.0 % done
sib.fastconf.EADock3: 42.1 % done
sib.fastconf.EADock3: 42.2 % done
sib.fastconf.EADock3: 42.3 % done
sib.fastconf.EADock3: 42.4 % done
sib.fastconf.EADock3: 42.5 % done
sib.fastconf.EADock3: 42.6 % done
sib.fastconf.EADock3: 42.7 % done
sib.fastconf.EADock3: 42.8 % done
sib.fastconf.EADock3: 42.9 % done
sib.fastconf.EADock3: 43.0 % done
sib.fastconf.EADock3: 43.1 % done
sib.fastconf.EADock3: 43.2 % done
sib.fastconf.EADock3: 43.3 % done
sib.fastconf.EADock3: 43.4 % done
sib.fastconf.EADock3: 43.5 % done
sib.fastconf.EADock3: 43.6 % done
sib.fastconf.EADock3: 43.7 % done
sib.fastconf.EADock3: 43.8 % done
sib.fastconf.EADock3: 43.9 % done
sib.fastconf.EADock3: 44.0 % done
sib.fastconf.EADock3: 44.1 % done
sib.fastconf.EADock3: 44.2 % done
sib.fastconf.EADock3: 44.3 % done
sib.fastconf.EADock3: 44.4 % done
sib.fastconf.EADock3: 44.5 % done
sib.fastconf.EADock3: 44.6 % done
sib.fastconf.EADock3: 44.7 % done
sib.fastconf.EADock3: 44.8 % done
sib.fastconf.EADock3: 44.9 % done
sib.fastconf.EADock3: 45.0 % done
sib.fastconf.EADock3: 45.1 % done
sib.fastconf.EADock3: 45.2 % done
sib.fastconf.EADock3: 45.3 % done
sib.fastconf.EADock3: 45.4 % done
sib.fastconf.EADock3: 45.5 % done
sib.fastconf.EADock3: 45.6 % done
sib.fastconf.EADock3: 45.7 % done
sib.fastconf.EADock3: 45.8 % done
sib.fastconf.EADock3: 45.9 % done
sib.fastconf.EADock3: 46.0 % done
sib.fastconf.EADock3: 46.1 % done
sib.fastconf.EADock3: 46.2 % done
sib.fastconf.EADock3: 46.3 % done
sib.fastconf.EADock3: 46.4 % done
sib.fastconf.EADock3: 46.5 % done
sib.fastconf.EADock3: 46.6 % done
sib.fastconf.EADock3: 46.7 % done
sib.fastconf.EADock3: 46.8 % done
sib.fastconf.EADock3: 46.9 % done
sib.fastconf.EADock3: 47.0 % done
sib.fastconf.EADock3: 47.1 % done
sib.fastconf.EADock3: 47.2 % done
sib.fastconf.EADock3: 47.3 % done
sib.fastconf.EADock3: 47.4 % done
sib.fastconf.EADock3: 47.5 % done
sib.fastconf.EADock3: 47.6 % done
sib.fastconf.EADock3: 47.7 % done
sib.fastconf.EADock3: 47.8 % done
sib.fastconf.EADock3: 47.9 % done
sib.fastconf.EADock3: 48.0 % done
sib.fastconf.EADock3: 48.1 % done
sib.fastconf.EADock3: 48.2 % done
sib.fastconf.EADock3: 48.3 % done
sib.fastconf.EADock3: 48.4 % done
sib.fastconf.EADock3: 48.5 % done
sib.fastconf.EADock3: 48.6 % done
sib.fastconf.EADock3: 48.7 % done
sib.fastconf.EADock3: 48.8 % done
sib.fastconf.EADock3: 48.9 % done
sib.fastconf.EADock3: 49.0 % done
sib.fastconf.EADock3: 49.1 % done
sib.fastconf.EADock3: 49.2 % done
sib.fastconf.EADock3: 49.3 % done
sib.fastconf.EADock3: 49.4 % done
sib.fastconf.EADock3: 49.5 % done
sib.fastconf.EADock3: 49.6 % done
sib.fastconf.EADock3: 49.7 % done
sib.fastconf.EADock3: 49.8 % done
sib.fastconf.EADock3: 49.9 % done
sib.fastconf.EADock3: 50.0 % done
sib.fastconf.EADock3: 50.1 % done
sib.fastconf.EADock3: 50.2 % done
sib.fastconf.EADock3: 50.3 % done
sib.fastconf.EADock3: 50.4 % done
sib.fastconf.EADock3: 50.5 % done
sib.fastconf.EADock3: 50.6 % done
sib.fastconf.EADock3: 50.7 % done
sib.fastconf.EADock3: 50.8 % done
sib.fastconf.EADock3: 50.9 % done
sib.fastconf.EADock3: 51.0 % done
sib.fastconf.EADock3: 51.1 % done
sib.fastconf.EADock3: 51.2 % done
sib.fastconf.EADock3: 51.3 % done
sib.fastconf.EADock3: 51.4 % done
sib.fastconf.EADock3: 51.5 % done
sib.fastconf.EADock3: 51.6 % done
sib.fastconf.EADock3: 51.7 % done
sib.fastconf.EADock3: 51.8 % done
sib.fastconf.EADock3: 51.9 % done
sib.fastconf.EADock3: 52.0 % done
sib.fastconf.EADock3: 52.1 % done
sib.fastconf.EADock3: 52.2 % done
sib.fastconf.EADock3: 52.3 % done
sib.fastconf.EADock3: 52.4 % done
sib.fastconf.EADock3: 52.5 % done
sib.fastconf.EADock3: 52.6 % done
sib.fastconf.EADock3: 52.7 % done
sib.fastconf.EADock3: 52.8 % done
sib.fastconf.EADock3: 52.9 % done
sib.fastconf.EADock3: 53.0 % done
sib.fastconf.EADock3: 53.1 % done
sib.fastconf.EADock3: 53.2 % done
sib.fastconf.EADock3: 53.3 % done
sib.fastconf.EADock3: 53.4 % done
sib.fastconf.EADock3: 53.5 % done
sib.fastconf.EADock3: 53.6 % done
sib.fastconf.EADock3: 53.7 % done
sib.fastconf.EADock3: 53.8 % done
sib.fastconf.EADock3: 53.9 % done
sib.fastconf.EADock3: 54.0 % done
sib.fastconf.EADock3: 54.1 % done
sib.fastconf.EADock3: 54.2 % done
sib.fastconf.EADock3: 54.3 % done
sib.fastconf.EADock3: 54.4 % done
sib.fastconf.EADock3: 54.5 % done
sib.fastconf.EADock3: 54.6 % done
sib.fastconf.EADock3: 54.7 % done
sib.fastconf.EADock3: 54.8 % done
sib.fastconf.EADock3: 54.9 % done
sib.fastconf.EADock3: 55.0 % done
sib.fastconf.EADock3: 55.1 % done
sib.fastconf.EADock3: 55.2 % done
sib.fastconf.EADock3: 55.3 % done
sib.fastconf.EADock3: 55.4 % done
sib.fastconf.EADock3: 55.5 % done
sib.fastconf.EADock3: 55.6 % done
sib.fastconf.EADock3: 55.7 % done
sib.fastconf.EADock3: 55.8 % done
sib.fastconf.EADock3: 55.9 % done
sib.fastconf.EADock3: 56.0 % done
sib.fastconf.EADock3: 56.1 % done
sib.fastconf.EADock3: 56.2 % done
sib.fastconf.EADock3: 56.3 % done
sib.fastconf.EADock3: 56.4 % done
sib.fastconf.EADock3: 56.5 % done
sib.fastconf.EADock3: 56.6 % done
sib.fastconf.EADock3: 56.7 % done
sib.fastconf.EADock3: 56.8 % done
sib.fastconf.EADock3: 56.9 % done
sib.fastconf.EADock3: 57.0 % done
sib.fastconf.EADock3: 57.1 % done
sib.fastconf.EADock3: 57.2 % done
sib.fastconf.EADock3: 57.3 % done
sib.fastconf.EADock3: 57.4 % done
sib.fastconf.EADock3: 57.5 % done
sib.fastconf.EADock3: 57.6 % done
sib.fastconf.EADock3: 57.7 % done
sib.fastconf.EADock3: 57.8 % done
sib.fastconf.EADock3: 57.9 % done
sib.fastconf.EADock3: 58.0 % done
sib.fastconf.EADock3: 58.1 % done
sib.fastconf.EADock3: 58.2 % done
sib.fastconf.EADock3: 58.3 % done
sib.fastconf.EADock3: 58.4 % done
sib.fastconf.EADock3: 58.5 % done
sib.fastconf.EADock3: 58.6 % done
sib.fastconf.EADock3: 58.7 % done
sib.fastconf.EADock3: 58.8 % done
sib.fastconf.EADock3: 58.9 % done
sib.fastconf.EADock3: 59.0 % done
sib.fastconf.EADock3: 59.1 % done
sib.fastconf.EADock3: 59.2 % done
sib.fastconf.EADock3: 59.3 % done
sib.fastconf.EADock3: 59.4 % done
sib.fastconf.EADock3: 59.5 % done
sib.fastconf.EADock3: 59.6 % done
sib.fastconf.EADock3: 59.7 % done
sib.fastconf.EADock3: 59.8 % done
sib.fastconf.EADock3: 59.9 % done
sib.fastconf.EADock3: 60.0 % done
sib.fastconf.EADock3: 60.1 % done
sib.fastconf.EADock3: 60.2 % done
sib.fastconf.EADock3: 60.3 % done
sib.fastconf.EADock3: 60.4 % done
sib.fastconf.EADock3: 60.5 % done
sib.fastconf.EADock3: 60.6 % done
sib.fastconf.EADock3: 60.7 % done
sib.fastconf.EADock3: 60.8 % done
sib.fastconf.EADock3: 60.9 % done
sib.fastconf.EADock3: 61.0 % done
sib.fastconf.EADock3: 61.1 % done
sib.fastconf.EADock3: 61.2 % done
sib.fastconf.EADock3: 61.3 % done
sib.fastconf.EADock3: 61.4 % done
sib.fastconf.EADock3: 61.5 % done
sib.fastconf.EADock3: 61.6 % done
sib.fastconf.EADock3: 61.7 % done
sib.fastconf.EADock3: 61.8 % done
sib.fastconf.EADock3: 61.9 % done
sib.fastconf.EADock3: 62.0 % done
sib.fastconf.EADock3: 62.1 % done
sib.fastconf.EADock3: 62.2 % done
sib.fastconf.EADock3: 62.3 % done
sib.fastconf.EADock3: 62.4 % done
sib.fastconf.EADock3: 62.5 % done
sib.fastconf.EADock3: 62.6 % done
sib.fastconf.EADock3: 62.7 % done
sib.fastconf.EADock3: 62.8 % done
sib.fastconf.EADock3: 62.9 % done
sib.fastconf.EADock3: 63.0 % done
sib.fastconf.EADock3: 63.1 % done
sib.fastconf.EADock3: 63.2 % done
sib.fastconf.EADock3: 63.3 % done
sib.fastconf.EADock3: 63.4 % done
sib.fastconf.EADock3: 63.5 % done
sib.fastconf.EADock3: 63.6 % done
sib.fastconf.EADock3: 63.7 % done
sib.fastconf.EADock3: 63.8 % done
sib.fastconf.EADock3: 63.9 % done
sib.fastconf.EADock3: 64.0 % done
sib.fastconf.EADock3: 64.1 % done
sib.fastconf.EADock3: 64.2 % done
sib.fastconf.EADock3: 64.3 % done
sib.fastconf.EADock3: 64.4 % done
sib.fastconf.EADock3: 64.5 % done
sib.fastconf.EADock3: 64.6 % done
sib.fastconf.EADock3: 64.7 % done
sib.fastconf.EADock3: 64.8 % done
sib.fastconf.EADock3: 64.9 % done
sib.fastconf.EADock3: 65.0 % done
sib.fastconf.EADock3: 65.1 % done
sib.fastconf.EADock3: 65.2 % done
sib.fastconf.EADock3: 65.3 % done
sib.fastconf.EADock3: 65.4 % done
sib.fastconf.EADock3: 65.5 % done
sib.fastconf.EADock3: 65.6 % done
sib.fastconf.EADock3: 65.7 % done
sib.fastconf.EADock3: 65.8 % done
sib.fastconf.EADock3: 65.9 % done
sib.fastconf.EADock3: 66.0 % done
sib.fastconf.EADock3: 66.1 % done
sib.fastconf.EADock3: 66.2 % done
sib.fastconf.EADock3: 66.3 % done
sib.fastconf.EADock3: 66.4 % done
sib.fastconf.EADock3: 66.5 % done
sib.fastconf.EADock3: 66.6 % done
sib.fastconf.EADock3: 66.7 % done
sib.fastconf.EADock3: 66.8 % done
sib.fastconf.EADock3: 66.9 % done
sib.fastconf.EADock3: 67.0 % done
sib.fastconf.EADock3: 67.1 % done
sib.fastconf.EADock3: 67.2 % done
sib.fastconf.EADock3: 67.3 % done
sib.fastconf.EADock3: 67.4 % done
sib.fastconf.EADock3: 67.5 % done
sib.fastconf.EADock3: 67.6 % done
sib.fastconf.EADock3: 67.7 % done
sib.fastconf.EADock3: 67.8 % done
sib.fastconf.EADock3: 67.9 % done
sib.fastconf.EADock3: 68.0 % done
sib.fastconf.EADock3: 68.1 % done
sib.fastconf.EADock3: 68.2 % done
sib.fastconf.EADock3: 68.3 % done
sib.fastconf.EADock3: 68.4 % done
sib.fastconf.EADock3: 68.5 % done
sib.fastconf.EADock3: 68.6 % done
sib.fastconf.EADock3: 68.7 % done
sib.fastconf.EADock3: 68.8 % done
sib.fastconf.EADock3: 68.9 % done
sib.fastconf.EADock3: 69.0 % done
sib.fastconf.EADock3: 69.1 % done
sib.fastconf.EADock3: 69.2 % done
sib.fastconf.EADock3: 69.3 % done
sib.fastconf.EADock3: 69.4 % done
sib.fastconf.EADock3: 69.5 % done
sib.fastconf.EADock3: 69.6 % done
sib.fastconf.EADock3: 69.7 % done
sib.fastconf.EADock3: 69.8 % done
sib.fastconf.EADock3: 69.9 % done
sib.fastconf.EADock3: 70.0 % done
sib.fastconf.EADock3: 70.1 % done
sib.fastconf.EADock3: 70.2 % done
sib.fastconf.EADock3: 70.3 % done
sib.fastconf.EADock3: 70.4 % done
sib.fastconf.EADock3: 70.5 % done
sib.fastconf.EADock3: 70.6 % done
sib.fastconf.EADock3: 70.7 % done
sib.fastconf.EADock3: 70.8 % done
sib.fastconf.EADock3: 70.9 % done
sib.fastconf.EADock3: 71.0 % done
sib.fastconf.EADock3: 71.1 % done
sib.fastconf.EADock3: 71.2 % done
sib.fastconf.EADock3: 71.3 % done
sib.fastconf.EADock3: 71.4 % done
sib.fastconf.EADock3: 71.5 % done
sib.fastconf.EADock3: 71.6 % done
sib.fastconf.EADock3: 71.7 % done
sib.fastconf.EADock3: 71.8 % done
sib.fastconf.EADock3: 71.9 % done
sib.fastconf.EADock3: 72.0 % done
sib.fastconf.EADock3: 72.1 % done
sib.fastconf.EADock3: 72.2 % done
sib.fastconf.EADock3: 72.3 % done
sib.fastconf.EADock3: 72.4 % done
sib.fastconf.EADock3: 72.5 % done
sib.fastconf.EADock3: 72.6 % done
sib.fastconf.EADock3: 72.7 % done
sib.fastconf.EADock3: 72.8 % done
sib.fastconf.EADock3: 72.9 % done
sib.fastconf.EADock3: 73.0 % done
sib.fastconf.EADock3: 73.1 % done
sib.fastconf.EADock3: 73.2 % done
sib.fastconf.EADock3: 73.3 % done
sib.fastconf.EADock3: 73.4 % done
sib.fastconf.EADock3: 73.5 % done
sib.fastconf.EADock3: 73.6 % done
sib.fastconf.EADock3: 73.7 % done
sib.fastconf.EADock3: 73.8 % done
sib.fastconf.EADock3: 73.9 % done
sib.fastconf.EADock3: 74.0 % done
sib.fastconf.EADock3: 74.1 % done
sib.fastconf.EADock3: 74.2 % done
sib.fastconf.EADock3: 74.3 % done
sib.fastconf.EADock3: 74.4 % done
sib.fastconf.EADock3: 74.5 % done
sib.fastconf.EADock3: 74.6 % done
sib.fastconf.EADock3: 74.7 % done
sib.fastconf.EADock3: 74.8 % done
sib.fastconf.EADock3: 74.9 % done
sib.fastconf.EADock3: 75.0 % done
sib.fastconf.EADock3: 75.1 % done
sib.fastconf.EADock3: 75.2 % done
sib.fastconf.EADock3: 75.3 % done
sib.fastconf.EADock3: 75.4 % done
sib.fastconf.EADock3: 75.5 % done
sib.fastconf.EADock3: 75.6 % done
sib.fastconf.EADock3: 75.7 % done
sib.fastconf.EADock3: 75.8 % done
sib.fastconf.EADock3: 75.9 % done
sib.fastconf.EADock3: 76.0 % done
sib.fastconf.EADock3: 76.1 % done
sib.fastconf.EADock3: 76.2 % done
sib.fastconf.EADock3: 76.3 % done
sib.fastconf.EADock3: 76.4 % done
sib.fastconf.EADock3: 76.5 % done
sib.fastconf.EADock3: 76.6 % done
sib.fastconf.EADock3: 76.7 % done
sib.fastconf.EADock3: 76.8 % done
sib.fastconf.EADock3: 76.9 % done
sib.fastconf.EADock3: 77.0 % done
sib.fastconf.EADock3: 77.1 % done
sib.fastconf.EADock3: 77.2 % done
sib.fastconf.EADock3: 77.3 % done
sib.fastconf.EADock3: 77.4 % done
sib.fastconf.EADock3: 77.5 % done
sib.fastconf.EADock3: 77.6 % done
sib.fastconf.EADock3: 77.7 % done
sib.fastconf.EADock3: 77.8 % done
sib.fastconf.EADock3: 77.9 % done
sib.fastconf.EADock3: 78.0 % done
sib.fastconf.EADock3: 78.1 % done
sib.fastconf.EADock3: 78.2 % done
sib.fastconf.EADock3: 78.3 % done
sib.fastconf.EADock3: 78.4 % done
sib.fastconf.EADock3: 78.5 % done
sib.fastconf.EADock3: 78.6 % done
sib.fastconf.EADock3: 78.7 % done
sib.fastconf.EADock3: 78.8 % done
sib.fastconf.EADock3: 78.9 % done
sib.fastconf.EADock3: 79.0 % done
sib.fastconf.EADock3: 79.1 % done
sib.fastconf.EADock3: 79.2 % done
sib.fastconf.EADock3: 79.3 % done
sib.fastconf.EADock3: 79.4 % done
sib.fastconf.EADock3: 79.5 % done
sib.fastconf.EADock3: 79.6 % done
sib.fastconf.EADock3: 79.7 % done
sib.fastconf.EADock3: 79.8 % done
sib.fastconf.EADock3: 79.9 % done
sib.fastconf.EADock3: 80.0 % done
sib.fastconf.EADock3: 80.1 % done
sib.fastconf.EADock3: 80.2 % done
sib.fastconf.EADock3: 80.3 % done
sib.fastconf.EADock3: 80.4 % done
sib.fastconf.EADock3: 80.5 % done
sib.fastconf.EADock3: 80.6 % done
sib.fastconf.EADock3: 80.7 % done
sib.fastconf.EADock3: 80.8 % done
sib.fastconf.EADock3: 80.9 % done
sib.fastconf.EADock3: 81.0 % done
sib.fastconf.EADock3: 81.1 % done
sib.fastconf.EADock3: 81.2 % done
sib.fastconf.EADock3: 81.3 % done
sib.fastconf.EADock3: 81.4 % done
sib.fastconf.EADock3: 81.5 % done
sib.fastconf.EADock3: 81.6 % done
sib.fastconf.EADock3: 81.7 % done
sib.fastconf.EADock3: 81.8 % done
sib.fastconf.EADock3: 81.9 % done
sib.fastconf.EADock3: 82.0 % done
sib.fastconf.EADock3: 82.1 % done
sib.fastconf.EADock3: 82.2 % done
sib.fastconf.EADock3: 82.3 % done
sib.fastconf.EADock3: 82.4 % done
sib.fastconf.EADock3: 82.5 % done
sib.fastconf.EADock3: 82.6 % done
sib.fastconf.EADock3: 82.7 % done
sib.fastconf.EADock3: 82.8 % done
sib.fastconf.EADock3: 82.9 % done
sib.fastconf.EADock3: 83.0 % done
sib.fastconf.EADock3: 83.1 % done
sib.fastconf.EADock3: 83.2 % done
sib.fastconf.EADock3: 83.3 % done
sib.fastconf.EADock3: 83.4 % done
sib.fastconf.EADock3: 83.5 % done
sib.fastconf.EADock3: 83.6 % done
sib.fastconf.EADock3: 83.7 % done
sib.fastconf.EADock3: 83.8 % done
sib.fastconf.EADock3: 83.9 % done
sib.fastconf.EADock3: 84.0 % done
sib.fastconf.EADock3: 84.1 % done
sib.fastconf.EADock3: 84.2 % done
sib.fastconf.EADock3: 84.3 % done
sib.fastconf.EADock3: 84.4 % done
sib.fastconf.EADock3: 84.5 % done
sib.fastconf.EADock3: 84.6 % done
sib.fastconf.EADock3: 84.7 % done
sib.fastconf.EADock3: 84.8 % done
sib.fastconf.EADock3: 84.9 % done
sib.fastconf.EADock3: 85.0 % done
sib.fastconf.EADock3: 85.1 % done
sib.fastconf.EADock3: 85.2 % done
sib.fastconf.EADock3: 85.3 % done
sib.fastconf.EADock3: 85.4 % done
sib.fastconf.EADock3: 85.5 % done
sib.fastconf.EADock3: 85.6 % done
sib.fastconf.EADock3: 85.7 % done
sib.fastconf.EADock3: 85.8 % done
sib.fastconf.EADock3: 85.9 % done
sib.fastconf.EADock3: 86.0 % done
sib.fastconf.EADock3: 86.1 % done
sib.fastconf.EADock3: 86.2 % done
sib.fastconf.EADock3: 86.3 % done
sib.fastconf.EADock3: 86.4 % done
sib.fastconf.EADock3: 86.5 % done
sib.fastconf.EADock3: 86.6 % done
sib.fastconf.EADock3: 86.7 % done
sib.fastconf.EADock3: 86.8 % done
sib.fastconf.EADock3: 86.9 % done
sib.fastconf.EADock3: 87.0 % done
sib.fastconf.EADock3: 87.1 % done
sib.fastconf.EADock3: 87.2 % done
sib.fastconf.EADock3: 87.3 % done
sib.fastconf.EADock3: 87.4 % done
sib.fastconf.EADock3: 87.5 % done
sib.fastconf.EADock3: 87.6 % done
sib.fastconf.EADock3: 87.7 % done
sib.fastconf.EADock3: 87.8 % done
sib.fastconf.EADock3: 87.9 % done
sib.fastconf.EADock3: 88.0 % done
sib.fastconf.EADock3: 88.1 % done
sib.fastconf.EADock3: 88.2 % done
sib.fastconf.EADock3: 88.3 % done
sib.fastconf.EADock3: 88.4 % done
sib.fastconf.EADock3: 88.5 % done
sib.fastconf.EADock3: 88.6 % done
sib.fastconf.EADock3: 88.7 % done
sib.fastconf.EADock3: 88.8 % done
sib.fastconf.EADock3: 88.9 % done
sib.fastconf.EADock3: 89.0 % done
sib.fastconf.EADock3: 89.1 % done
sib.fastconf.EADock3: 89.2 % done
sib.fastconf.EADock3: 89.3 % done
sib.fastconf.EADock3: 89.4 % done
sib.fastconf.EADock3: 89.5 % done
sib.fastconf.EADock3: 89.6 % done
sib.fastconf.EADock3: 89.7 % done
sib.fastconf.EADock3: 89.8 % done
sib.fastconf.EADock3: 89.9 % done
sib.fastconf.EADock3: 90.0 % done
sib.fastconf.EADock3: 90.1 % done
sib.fastconf.EADock3: 90.2 % done
sib.fastconf.EADock3: 90.3 % done
sib.fastconf.EADock3: 90.4 % done
sib.fastconf.EADock3: 90.5 % done
sib.fastconf.EADock3: 90.6 % done
sib.fastconf.EADock3: 90.7 % done
sib.fastconf.EADock3: 90.8 % done
sib.fastconf.EADock3: 90.9 % done
sib.fastconf.EADock3: 91.0 % done
sib.fastconf.EADock3: 91.1 % done
sib.fastconf.EADock3: 91.2 % done
sib.fastconf.EADock3: 91.3 % done
sib.fastconf.EADock3: 91.4 % done
sib.fastconf.EADock3: 91.5 % done
sib.fastconf.EADock3: 91.6 % done
sib.fastconf.EADock3: 91.7 % done
sib.fastconf.EADock3: 91.8 % done
sib.fastconf.EADock3: 91.9 % done
sib.fastconf.EADock3: 92.0 % done
sib.fastconf.EADock3: 92.1 % done
sib.fastconf.EADock3: 92.2 % done
sib.fastconf.EADock3: 92.3 % done
sib.fastconf.EADock3: 92.4 % done
sib.fastconf.EADock3: 92.5 % done
sib.fastconf.EADock3: 92.6 % done
sib.fastconf.EADock3: 92.7 % done
sib.fastconf.EADock3: 92.8 % done
sib.fastconf.EADock3: 92.9 % done
sib.fastconf.EADock3: 93.0 % done
sib.fastconf.EADock3: 93.1 % done
sib.fastconf.EADock3: 93.2 % done
sib.fastconf.EADock3: 93.3 % done
sib.fastconf.EADock3: 93.4 % done
sib.fastconf.EADock3: 93.5 % done
sib.fastconf.EADock3: 93.6 % done
sib.fastconf.EADock3: 93.7 % done
sib.fastconf.EADock3: 93.8 % done
sib.fastconf.EADock3: 93.9 % done
sib.fastconf.EADock3: 94.0 % done
sib.fastconf.EADock3: 94.1 % done
sib.fastconf.EADock3: 94.2 % done
sib.fastconf.EADock3: 94.3 % done
sib.fastconf.EADock3: 94.4 % done
sib.fastconf.EADock3: 94.5 % done
sib.fastconf.EADock3: 94.6 % done
sib.fastconf.EADock3: 94.7 % done
sib.fastconf.EADock3: 94.8 % done
sib.fastconf.EADock3: 94.9 % done
sib.fastconf.EADock3: 95.0 % done
sib.fastconf.EADock3: 95.1 % done
sib.fastconf.EADock3: 95.2 % done
sib.fastconf.EADock3: 95.3 % done
sib.fastconf.EADock3: 95.4 % done
sib.fastconf.EADock3: 95.5 % done
sib.fastconf.EADock3: 95.6 % done
sib.fastconf.EADock3: 95.7 % done
sib.fastconf.EADock3: 95.8 % done
sib.fastconf.EADock3: 95.9 % done
sib.fastconf.EADock3: 96.0 % done
sib.fastconf.EADock3: 96.1 % done
sib.fastconf.EADock3: 96.2 % done
sib.fastconf.EADock3: 96.3 % done
sib.fastconf.EADock3: 96.4 % done
sib.fastconf.EADock3: 96.5 % done
sib.fastconf.EADock3: 96.6 % done
sib.fastconf.EADock3: 96.7 % done
sib.fastconf.EADock3: 96.8 % done
sib.fastconf.EADock3: 96.9 % done
sib.fastconf.EADock3: 97.0 % done
sib.fastconf.EADock3: 97.1 % done
sib.fastconf.EADock3: 97.2 % done
sib.fastconf.EADock3: 97.3 % done
sib.fastconf.EADock3: 97.4 % done
sib.fastconf.EADock3: 97.5 % done
sib.fastconf.EADock3: 97.6 % done
sib.fastconf.EADock3: 97.7 % done
sib.fastconf.EADock3: 97.8 % done
sib.fastconf.EADock3: 97.9 % done
sib.fastconf.EADock3: 98.0 % done
sib.fastconf.EADock3: 98.1 % done
sib.fastconf.EADock3: 98.2 % done
sib.fastconf.EADock3: 98.3 % done
sib.fastconf.EADock3: 98.4 % done
sib.fastconf.EADock3: 98.5 % done
sib.fastconf.EADock3: 98.6 % done
sib.fastconf.EADock3: 98.7 % done
sib.fastconf.EADock3: 98.8 % done
sib.fastconf.EADock3: 98.9 % done
sib.fastconf.EADock3: 99.0 % done
sib.fastconf.EADock3: 99.1 % done
sib.fastconf.EADock3: 99.2 % done
sib.fastconf.EADock3: 99.3 % done
sib.fastconf.EADock3: 99.4 % done
sib.fastconf.EADock3: 99.5 % done
sib.fastconf.EADock3: 99.6 % done
sib.fastconf.EADock3: 99.7 % done
sib.fastconf.EADock3: 99.8 % done
sib.fastconf.EADock3: 99.9 % done
sib.fastconf.EADock3: 100.0 % done
sib.fastconf.EADock3: The generation of 3849 conformations took 415130 s
sib.fastconf.EADock3: The DSS engine failed 26523 times to find a suitable BMs within the allowed time limit of 500 ms
sib.fastconf.EADock3: Minimizing binding mode 0, energy is -5061.013, rmsd is 38.14644
sib.fastconf.EADock3: Minimizing binding mode 1, energy is -2417.527, rmsd is 22.098928
sib.fastconf.EADock3: Minimizing binding mode 2, energy is -2409.0735, rmsd is 35.853394
sib.fastconf.EADock3: Minimizing binding mode 3, energy is -1871.2585, rmsd is 48.977283
sib.fastconf.EADock3: Minimizing binding mode 4, energy is -1312.642, rmsd is 37.118496
sib.fastconf.EADock3: Minimizing binding mode 5, energy is -732.46515, rmsd is 27.46594
sib.fastconf.EADock3: Minimizing binding mode 6, energy is -517.7618, rmsd is 21.83526
sib.fastconf.EADock3: Minimizing binding mode 7, energy is -396.05084, rmsd is 29.383257
sib.fastconf.EADock3: Minimizing binding mode 8, energy is -303.9336, rmsd is 42.40924
sib.fastconf.EADock3: Minimizing binding mode 9, energy is -247.14525, rmsd is 24.125937
sib.fastconf.EADock3: Minimizing binding mode 10, energy is -160.6871, rmsd is 21.38942
sib.fastconf.EADock3: Minimizing binding mode 11, energy is -157.04454, rmsd is 47.31663
sib.fastconf.EADock3: Minimizing binding mode 12, energy is -138.4545, rmsd is 49.7955
sib.fastconf.EADock3: Minimizing binding mode 13, energy is -136.07948, rmsd is 55.29823
sib.fastconf.EADock3: Minimizing binding mode 14, energy is -120.981186, rmsd is 35.805786
sib.fastconf.EADock3: Minimizing binding mode 15, energy is -78.22205, rmsd is 22.471794
sib.fastconf.EADock3: Minimizing binding mode 16, energy is -64.623024, rmsd is 23.374529
sib.fastconf.EADock3: Minimizing binding mode 17, energy is -61.90571, rmsd is 42.366787
sib.fastconf.EADock3: Minimizing binding mode 18, energy is -53.011425, rmsd is 43.527397
sib.fastconf.EADock3: Minimizing binding mode 19, energy is -11.892284, rmsd is 22.154966
sib.fastconf.EADock3: Minimizing binding mode 20, energy is 8.548839, rmsd is 52.116207
sib.fastconf.EADock3: Minimizing binding mode 21, energy is 14.162563, rmsd is 3.4053073
sib.fastconf.EADock3: Minimizing binding mode 22, energy is 49.927956, rmsd is 3.2575598
sib.fastconf.EADock3: Minimizing binding mode 23, energy is 82.12174, rmsd is 35.470085
sib.fastconf.EADock3: Minimizing binding mode 24, energy is 88.8218, rmsd is 3.2899945
sib.fastconf.EADock3: Minimizing binding mode 25, energy is 115.60007, rmsd is 1.5185077
sib.fastconf.EADock3: Minimizing binding mode 26, energy is 117.72574, rmsd is 54.30157
sib.fastconf.EADock3: Minimizing binding mode 27, energy is 121.619644, rmsd is 2.2908075
sib.fastconf.EADock3: Minimizing binding mode 28, energy is 125.92695, rmsd is 3.1738696
sib.fastconf.EADock3: Minimizing binding mode 29, energy is 127.3832, rmsd is 23.014666
sib.fastconf.EADock3: Minimizing binding mode 30, energy is 132.17432, rmsd is 20.822945
sib.fastconf.EADock3: Minimizing binding mode 31, energy is 132.41373, rmsd is 20.560362
sib.fastconf.EADock3: Minimizing binding mode 32, energy is 132.99585, rmsd is 22.773472
sib.fastconf.EADock3: Minimizing binding mode 33, energy is 133.77657, rmsd is 35.14909
sib.fastconf.EADock3: Minimizing binding mode 34, energy is 133.83244, rmsd is 3.3752406
sib.fastconf.EADock3: Minimizing binding mode 35, energy is 134.35149, rmsd is 55.43993
sib.fastconf.EADock3: Minimizing binding mode 36, energy is 135.42267, rmsd is 20.4902
sib.fastconf.EADock3: Minimizing binding mode 37, energy is 135.99507, rmsd is 3.3279767
sib.fastconf.EADock3: Minimizing binding mode 38, energy is 136.40883, rmsd is 38.14493
sib.fastconf.EADock3: Minimizing binding mode 39, energy is 136.43764, rmsd is 52.849358
sib.fastconf.EADock3: Minimizing binding mode 40, energy is 136.5923, rmsd is 19.69478
sib.fastconf.EADock3: Minimizing binding mode 41, energy is 136.81897, rmsd is 49.275215
sib.fastconf.EADock3: Minimizing binding mode 42, energy is 136.94536, rmsd is 52.760033
sib.fastconf.EADock3: Minimizing binding mode 43, energy is 137.30074, rmsd is 51.984188
sib.fastconf.EADock3: Minimizing binding mode 44, energy is 137.59727, rmsd is 22.007479
sib.fastconf.EADock3: Minimizing binding mode 45, energy is 138.26735, rmsd is 19.534498
sib.fastconf.EADock3: Minimizing binding mode 46, energy is 139.95462, rmsd is 23.80076
sib.fastconf.EADock3: Minimizing binding mode 47, energy is 140.59149, rmsd is 19.18135
sib.fastconf.EADock3: Minimizing binding mode 48, energy is 140.7159, rmsd is 32.74856
sib.fastconf.EADock3: Minimizing binding mode 49, energy is 141.64938, rmsd is 20.47695
sib.fastconf.EADock3: Minimizing binding mode 50, energy is 141.93018, rmsd is 53.171665
sib.fastconf.EADock3: Minimizing binding mode 51, energy is 142.18233, rmsd is 21.40653
sib.fastconf.EADock3: Minimizing binding mode 52, energy is 142.67896, rmsd is 19.725613
sib.fastconf.EADock3: Minimizing binding mode 53, energy is 142.9474, rmsd is 25.144464
sib.fastconf.EADock3: Minimizing binding mode 54, energy is 143.12253, rmsd is 1.4335972
sib.fastconf.EADock3: Minimizing binding mode 55, energy is 143.49861, rmsd is 28.543993
sib.fastconf.EADock3: Minimizing binding mode 56, energy is 144.02977, rmsd is 31.128168
sib.fastconf.EADock3: Minimizing binding mode 57, energy is 144.06615, rmsd is 1.1052284
sib.fastconf.EADock3: Minimizing binding mode 58, energy is 144.16136, rmsd is 24.589724
sib.fastconf.EADock3: Minimizing binding mode 59, energy is 144.28004, rmsd is 47.331593
sib.fastconf.EADock3: Minimizing binding mode 60, energy is 144.31299, rmsd is 3.0013416
sib.fastconf.EADock3: Minimizing binding mode 61, energy is 144.40968, rmsd is 36.875244
sib.fastconf.EADock3: Minimizing binding mode 62, energy is 144.4526, rmsd is 22.571741
sib.fastconf.EADock3: Minimizing binding mode 63, energy is 145.42752, rmsd is 25.318348
sib.fastconf.EADock3: Minimizing binding mode 64, energy is 145.43027, rmsd is 21.41661
sib.fastconf.EADock3: Minimizing binding mode 65, energy is 145.8207, rmsd is 21.514719
sib.fastconf.EADock3: Minimizing binding mode 66, energy is 146.04965, rmsd is 2.4199176
sib.fastconf.EADock3: Minimizing binding mode 67, energy is 146.10898, rmsd is 22.45937
sib.fastconf.EADock3: Minimizing binding mode 68, energy is 146.18759, rmsd is 2.6989703
sib.fastconf.EADock3: Minimizing binding mode 69, energy is 147.2568, rmsd is 29.136765
sib.fastconf.EADock3: Minimizing binding mode 70, energy is 147.3443, rmsd is 20.876232
sib.fastconf.EADock3: Minimizing binding mode 71, energy is 147.6852, rmsd is 25.388199
sib.fastconf.EADock3: Minimizing binding mode 72, energy is 148.05536, rmsd is 35.465683
sib.fastconf.EADock3: Minimizing binding mode 73, energy is 148.24226, rmsd is 51.16999
sib.fastconf.EADock3: Minimizing binding mode 74, energy is 148.28516, rmsd is 24.108742
sib.fastconf.EADock3: Minimizing binding mode 75, energy is 148.79747, rmsd is 23.868546
sib.fastconf.EADock3: Minimizing binding mode 76, energy is 148.8943, rmsd is 21.344288
sib.fastconf.EADock3: Minimizing binding mode 77, energy is 148.9797, rmsd is 1.9166584
sib.fastconf.EADock3: Minimizing binding mode 78, energy is 149.0859, rmsd is 2.9805307
sib.fastconf.EADock3: Minimizing binding mode 79, energy is 149.10378, rmsd is 52.523323
sib.fastconf.EADock3: Minimizing binding mode 80, energy is 150.22208, rmsd is 21.374348
sib.fastconf.EADock3: Minimizing binding mode 81, energy is 150.55298, rmsd is 55.092743
sib.fastconf.EADock3: Minimizing binding mode 82, energy is 150.62411, rmsd is 28.668663
sib.fastconf.EADock3: Minimizing binding mode 83, energy is 151.18079, rmsd is 47.466938
sib.fastconf.EADock3: Minimizing binding mode 84, energy is 151.4065, rmsd is 28.052084
sib.fastconf.EADock3: Minimizing binding mode 85, energy is 152.06274, rmsd is 2.2177286
sib.fastconf.EADock3: Minimizing binding mode 86, energy is 152.22852, rmsd is 22.505112
sib.fastconf.EADock3: Minimizing binding mode 87, energy is 153.25882, rmsd is 24.648808
sib.fastconf.EADock3: Minimizing binding mode 88, energy is 153.32332, rmsd is 39.19188
sib.fastconf.EADock3: Minimizing binding mode 89, energy is 153.3447, rmsd is 28.690544
sib.fastconf.EADock3: Minimizing binding mode 90, energy is 153.81847, rmsd is 36.284588
sib.fastconf.EADock3: Minimizing binding mode 91, energy is 154.13826, rmsd is 54.196747
sib.fastconf.EADock3: Minimizing binding mode 92, energy is 154.171, rmsd is 29.801594
sib.fastconf.EADock3: Minimizing binding mode 93, energy is 154.22322, rmsd is 24.849117
sib.fastconf.EADock3: Minimizing binding mode 94, energy is 154.26373, rmsd is 2.984411
sib.fastconf.EADock3: Minimizing binding mode 95, energy is 154.68735, rmsd is 47.417557
sib.fastconf.EADock3: Minimizing binding mode 96, energy is 154.83054, rmsd is 29.720642
sib.fastconf.EADock3: Minimizing binding mode 97, energy is 154.96744, rmsd is 2.478262
sib.fastconf.EADock3: Minimizing binding mode 98, energy is 155.0714, rmsd is 48.328865
sib.fastconf.EADock3: Minimizing binding mode 99, energy is 156.54987, rmsd is 28.86429
sib.fastconf.EADock3: Minimizing binding mode 100, energy is 156.66411, rmsd is 21.376528
sib.fastconf.EADock3: Minimizing binding mode 101, energy is 157.19725, rmsd is 3.0114372
sib.fastconf.EADock3: Minimizing binding mode 102, energy is 157.48956, rmsd is 22.031094
sib.fastconf.EADock3: Minimizing binding mode 103, energy is 157.54881, rmsd is 53.869183
sib.fastconf.EADock3: Minimizing binding mode 104, energy is 157.9003, rmsd is 45.8236
sib.fastconf.EADock3: Minimizing binding mode 105, energy is 158.23616, rmsd is 20.801712
sib.fastconf.EADock3: Minimizing binding mode 106, energy is 158.49245, rmsd is 30.613903
sib.fastconf.EADock3: Minimizing binding mode 107, energy is 158.76132, rmsd is 0.9311708
sib.fastconf.EADock3: Minimizing binding mode 108, energy is 158.99403, rmsd is 46.499447
sib.fastconf.EADock3: Minimizing binding mode 109, energy is 159.14427, rmsd is 34.782177
sib.fastconf.EADock3: Minimizing binding mode 110, energy is 159.18756, rmsd is 48.739716
sib.fastconf.EADock3: Minimizing binding mode 111, energy is 159.21014, rmsd is 30.202833
sib.fastconf.EADock3: Minimizing binding mode 112, energy is 159.42178, rmsd is 3.3305347
sib.fastconf.EADock3: Minimizing binding mode 113, energy is 159.50275, rmsd is 3.365711
sib.fastconf.EADock3: Minimizing binding mode 114, energy is 159.87822, rmsd is 21.249466
sib.fastconf.EADock3: Minimizing binding mode 115, energy is 160.65123, rmsd is 2.4428473
sib.fastconf.EADock3: Minimizing binding mode 116, energy is 160.65605, rmsd is 37.37709
sib.fastconf.EADock3: Minimizing binding mode 117, energy is 160.90144, rmsd is 23.30516
sib.fastconf.EADock3: Minimizing binding mode 118, energy is 161.0002, rmsd is 19.770746
sib.fastconf.EADock3: Minimizing binding mode 119, energy is 161.59367, rmsd is 20.200594
sib.fastconf.EADock3: Minimizing binding mode 120, energy is 162.12099, rmsd is 21.692669
sib.fastconf.EADock3: Minimizing binding mode 121, energy is 162.20723, rmsd is 1.4505272
sib.fastconf.EADock3: Minimizing binding mode 122, energy is 162.44337, rmsd is 27.782808
sib.fastconf.EADock3: Minimizing binding mode 123, energy is 162.53804, rmsd is 3.129993
sib.fastconf.EADock3: Minimizing binding mode 124, energy is 162.8707, rmsd is 33.93329
sib.fastconf.EADock3: Minimizing binding mode 125, energy is 162.97234, rmsd is 54.791782
sib.fastconf.EADock3: Minimizing binding mode 126, energy is 163.02922, rmsd is 1.903071
sib.fastconf.EADock3: Minimizing binding mode 127, energy is 163.34596, rmsd is 21.297052
sib.fastconf.EADock3: Minimizing binding mode 128, energy is 163.58043, rmsd is 3.304099
sib.fastconf.EADock3: Minimizing binding mode 129, energy is 163.68213, rmsd is 1.4404712
sib.fastconf.EADock3: Minimizing binding mode 130, energy is 164.08084, rmsd is 29.45147
sib.fastconf.EADock3: Minimizing binding mode 131, energy is 164.4391, rmsd is 1.5786437
sib.fastconf.EADock3: Minimizing binding mode 132, energy is 164.54747, rmsd is 2.8805678
sib.fastconf.EADock3: Minimizing binding mode 133, energy is 164.9726, rmsd is 37.753757
sib.fastconf.EADock3: Minimizing binding mode 134, energy is 165.16673, rmsd is 54.04473
sib.fastconf.EADock3: Minimizing binding mode 135, energy is 165.23564, rmsd is 23.211067
sib.fastconf.EADock3: Minimizing binding mode 136, energy is 165.83418, rmsd is 24.503174
sib.fastconf.EADock3: Minimizing binding mode 137, energy is 165.91872, rmsd is 48.592693
sib.fastconf.EADock3: Minimizing binding mode 138, energy is 166.17897, rmsd is 20.131657
sib.fastconf.EADock3: Minimizing binding mode 139, energy is 166.7119, rmsd is 2.8921793
sib.fastconf.EADock3: Minimizing binding mode 140, energy is 166.78992, rmsd is 36.182552
sib.fastconf.EADock3: Minimizing binding mode 141, energy is 166.90184, rmsd is 24.319563
sib.fastconf.EADock3: Minimizing binding mode 142, energy is 166.93492, rmsd is 62.754295
sib.fastconf.EADock3: Minimizing binding mode 143, energy is 166.97661, rmsd is 22.015406
sib.fastconf.EADock3: Minimizing binding mode 144, energy is 167.0458, rmsd is 3.0791385
sib.fastconf.EADock3: Minimizing binding mode 145, energy is 167.31393, rmsd is 22.765482
sib.fastconf.EADock3: Minimizing binding mode 146, energy is 167.37643, rmsd is 20.852585
sib.fastconf.EADock3: Minimizing binding mode 147, energy is 167.45554, rmsd is 21.549742
sib.fastconf.EADock3: Minimizing binding mode 148, energy is 167.88832, rmsd is 37.493107
sib.fastconf.EADock3: Minimizing binding mode 149, energy is 167.93007, rmsd is 1.7223012
sib.fastconf.EADock3: Minimizing binding mode 150, energy is 167.99696, rmsd is 3.344412
sib.fastconf.EADock3: Minimizing binding mode 151, energy is 168.6052, rmsd is 28.54329
sib.fastconf.EADock3: Minimizing binding mode 152, energy is 168.66571, rmsd is 36.18821
sib.fastconf.EADock3: Minimizing binding mode 153, energy is 168.68668, rmsd is 3.1965854
sib.fastconf.EADock3: Minimizing binding mode 154, energy is 168.94301, rmsd is 45.541996
sib.fastconf.EADock3: Minimizing binding mode 155, energy is 169.13004, rmsd is 52.567734
sib.fastconf.EADock3: Minimizing binding mode 156, energy is 169.39828, rmsd is 23.109245
sib.fastconf.EADock3: Minimizing binding mode 157, energy is 169.47983, rmsd is 34.138577
sib.fastconf.EADock3: Minimizing binding mode 158, energy is 169.94885, rmsd is 28.562288
sib.fastconf.EADock3: Minimizing binding mode 159, energy is 170.21735, rmsd is 35.74345
sib.fastconf.EADock3: Minimizing binding mode 160, energy is 170.22592, rmsd is 2.8302083
sib.fastconf.EADock3: Minimizing binding mode 161, energy is 170.3312, rmsd is 43.824905
sib.fastconf.EADock3: Minimizing binding mode 162, energy is 170.33298, rmsd is 35.069138
sib.fastconf.EADock3: Minimizing binding mode 163, energy is 170.64142, rmsd is 19.931221
sib.fastconf.EADock3: Minimizing binding mode 164, energy is 170.89291, rmsd is 53.87055
sib.fastconf.EADock3: Minimizing binding mode 165, energy is 171.28372, rmsd is 20.01484
sib.fastconf.EADock3: Minimizing binding mode 166, energy is 171.4771, rmsd is 28.882452
sib.fastconf.EADock3: Minimizing binding mode 167, energy is 171.53789, rmsd is 24.108507
sib.fastconf.EADock3: Minimizing binding mode 168, energy is 171.64043, rmsd is 1.458123
sib.fastconf.EADock3: Minimizing binding mode 169, energy is 171.69092, rmsd is 52.350357
sib.fastconf.EADock3: Minimizing binding mode 170, energy is 171.69736, rmsd is 20.555357
sib.fastconf.EADock3: Minimizing binding mode 171, energy is 172.07622, rmsd is 21.31154
sib.fastconf.EADock3: Minimizing binding mode 172, energy is 172.7682, rmsd is 21.389322
sib.fastconf.EADock3: Minimizing binding mode 173, energy is 172.78856, rmsd is 51.219345
sib.fastconf.EADock3: Minimizing binding mode 174, energy is 172.96278, rmsd is 36.73494
sib.fastconf.EADock3: Minimizing binding mode 175, energy is 173.66162, rmsd is 21.852959
sib.fastconf.EADock3: Minimizing binding mode 176, energy is 173.6803, rmsd is 3.0038223
sib.fastconf.EADock3: Minimizing binding mode 177, energy is 173.72472, rmsd is 35.73479
sib.fastconf.EADock3: Minimizing binding mode 178, energy is 173.90982, rmsd is 3.0200026
sib.fastconf.EADock3: Minimizing binding mode 179, energy is 174.01122, rmsd is 30.091032
sib.fastconf.EADock3: Minimizing binding mode 180, energy is 174.32979, rmsd is 2.9454122
sib.fastconf.EADock3: Minimizing binding mode 181, energy is 174.67223, rmsd is 47.41583
sib.fastconf.EADock3: Minimizing binding mode 182, energy is 174.70212, rmsd is 30.22625
sib.fastconf.EADock3: Minimizing binding mode 183, energy is 174.79594, rmsd is 26.077204
sib.fastconf.EADock3: Minimizing binding mode 184, energy is 174.82126, rmsd is 28.998
sib.fastconf.EADock3: Minimizing binding mode 185, energy is 174.86928, rmsd is 2.956097
sib.fastconf.EADock3: Minimizing binding mode 186, energy is 174.9531, rmsd is 29.339499
sib.fastconf.EADock3: Minimizing binding mode 187, energy is 174.99002, rmsd is 22.513266
sib.fastconf.EADock3: Minimizing binding mode 188, energy is 174.99718, rmsd is 20.705168
sib.fastconf.EADock3: Minimizing binding mode 189, energy is 175.03072, rmsd is 29.5262
sib.fastconf.EADock3: Minimizing binding mode 190, energy is 175.46571, rmsd is 28.53789
sib.fastconf.EADock3: Minimizing binding mode 191, energy is 176.47406, rmsd is 22.361897
sib.fastconf.EADock3: Minimizing binding mode 192, energy is 176.79054, rmsd is 3.3953109
sib.fastconf.EADock3: Minimizing binding mode 193, energy is 176.9586, rmsd is 47.656784
sib.fastconf.EADock3: Minimizing binding mode 194, energy is 177.14108, rmsd is 1.8995513
sib.fastconf.EADock3: Minimizing binding mode 195, energy is 177.31975, rmsd is 2.7090974
sib.fastconf.EADock3: Minimizing binding mode 196, energy is 177.38818, rmsd is 3.114663
sib.fastconf.EADock3: Minimizing binding mode 197, energy is 177.77402, rmsd is 54.153767
sib.fastconf.EADock3: Minimizing binding mode 198, energy is 177.8747, rmsd is 25.46074
sib.fastconf.EADock3: Minimizing binding mode 199, energy is 178.04309, rmsd is 47.678257
sib.fastconf.EADock3: Minimizing binding mode 200, energy is 178.08026, rmsd is 21.346697
sib.fastconf.EADock3: Minimizing binding mode 201, energy is 178.09085, rmsd is 34.413033
sib.fastconf.EADock3: Minimizing binding mode 202, energy is 178.16595, rmsd is 22.670246
sib.fastconf.EADock3: Minimizing binding mode 203, energy is 178.39922, rmsd is 1.7312715
sib.fastconf.EADock3: Minimizing binding mode 204, energy is 178.54979, rmsd is 21.281662
sib.fastconf.EADock3: Minimizing binding mode 205, energy is 178.84402, rmsd is 3.5880206
sib.fastconf.EADock3: Minimizing binding mode 206, energy is 178.87787, rmsd is 1.4757775
sib.fastconf.EADock3: Minimizing binding mode 207, energy is 178.98338, rmsd is 1.3135568
sib.fastconf.EADock3: Minimizing binding mode 208, energy is 179.18813, rmsd is 38.620354
sib.fastconf.EADock3: Minimizing binding mode 209, energy is 179.3768, rmsd is 2.6298325
sib.fastconf.EADock3: Minimizing binding mode 210, energy is 179.38666, rmsd is 47.759563
sib.fastconf.EADock3: Minimizing binding mode 211, energy is 179.41695, rmsd is 35.42826
sib.fastconf.EADock3: Minimizing binding mode 212, energy is 179.60365, rmsd is 1.8934712
sib.fastconf.EADock3: Minimizing binding mode 213, energy is 179.8436, rmsd is 20.707792
sib.fastconf.EADock3: Minimizing binding mode 214, energy is 179.9703, rmsd is 44.90566
sib.fastconf.EADock3: Minimizing binding mode 215, energy is 180.12671, rmsd is 28.574951
sib.fastconf.EADock3: Minimizing binding mode 216, energy is 180.18002, rmsd is 35.617813
sib.fastconf.EADock3: Minimizing binding mode 217, energy is 181.12714, rmsd is 22.295675
sib.fastconf.EADock3: Minimizing binding mode 218, energy is 181.144, rmsd is 48.01253
sib.fastconf.EADock3: Minimizing binding mode 219, energy is 181.48308, rmsd is 51.65915
sib.fastconf.EADock3: Minimizing binding mode 220, energy is 181.48419, rmsd is 48.668182
sib.fastconf.EADock3: Minimizing binding mode 221, energy is 181.52441, rmsd is 29.099123
sib.fastconf.EADock3: Minimizing binding mode 222, energy is 181.52737, rmsd is 30.482937
sib.fastconf.EADock3: Minimizing binding mode 223, energy is 182.34961, rmsd is 2.8674514
sib.fastconf.EADock3: Minimizing binding mode 224, energy is 182.51453, rmsd is 35.303734
sib.fastconf.EADock3: Minimizing binding mode 225, energy is 182.70715, rmsd is 46.830444
sib.fastconf.EADock3: Minimizing binding mode 226, energy is 182.72345, rmsd is 48.19416
sib.fastconf.EADock3: Minimizing binding mode 227, energy is 182.85988, rmsd is 27.768972
sib.fastconf.EADock3: Minimizing binding mode 228, energy is 182.98314, rmsd is 29.895555
sib.fastconf.EADock3: Minimizing binding mode 229, energy is 183.15677, rmsd is 36.167484
sib.fastconf.EADock3: Minimizing binding mode 230, energy is 183.21825, rmsd is 28.658121
sib.fastconf.EADock3: Minimizing binding mode 231, energy is 183.33496, rmsd is 28.815042
sib.fastconf.EADock3: Minimizing binding mode 232, energy is 183.35909, rmsd is 47.633244
sib.fastconf.EADock3: Minimizing binding mode 233, energy is 183.38367, rmsd is 1.909319
sib.fastconf.EADock3: Minimizing binding mode 234, energy is 183.4365, rmsd is 51.710575
sib.fastconf.EADock3: Minimizing binding mode 235, energy is 183.44978, rmsd is 1.2486962
sib.fastconf.EADock3: Minimizing binding mode 236, energy is 183.58255, rmsd is 46.68689
sib.fastconf.EADock3: Minimizing binding mode 237, energy is 183.59933, rmsd is 37.98046
sib.fastconf.EADock3: Minimizing binding mode 238, energy is 183.95758, rmsd is 28.574455
sib.fastconf.EADock3: Minimizing binding mode 239, energy is 183.9679, rmsd is 52.11122
sib.fastconf.EADock3: Minimizing binding mode 240, energy is 184.11374, rmsd is 3.0271323
sib.fastconf.EADock3: Minimizing binding mode 241, energy is 184.15298, rmsd is 44.346092
sib.fastconf.EADock3: Minimizing binding mode 242, energy is 184.3176, rmsd is 46.799065
sib.fastconf.EADock3: Minimizing binding mode 243, energy is 184.36623, rmsd is 22.910334
sib.fastconf.EADock3: Minimizing binding mode 244, energy is 184.75624, rmsd is 54.2092
sib.fastconf.EADock3: Minimizing binding mode 245, energy is 185.20108, rmsd is 54.63901
sib.fastconf.EADock3: Minimizing binding mode 246, energy is 185.4062, rmsd is 20.896729
sib.fastconf.EADock3: Minimizing binding mode 247, energy is 185.5483, rmsd is 3.2455807
sib.fastconf.EADock3: Minimizing binding mode 248, energy is 185.70758, rmsd is 2.7161663
sib.fastconf.EADock3: Minimizing binding mode 249, energy is 185.79575, rmsd is 19.324883
sib.fastconf.EADock3: Minimizing binding mode 250, energy is 186.44379, rmsd is 2.1056602
sib.fastconf.EADock3: Minimizing binding mode 251, energy is 186.69664, rmsd is 29.465746
sib.fastconf.EADock3: Minimizing binding mode 252, energy is 186.8695, rmsd is 51.411488
sib.fastconf.EADock3: Minimizing binding mode 253, energy is 186.89601, rmsd is 48.375683
sib.fastconf.EADock3: Minimizing binding mode 254, energy is 187.02997, rmsd is 20.802616
sib.fastconf.EADock3: Minimizing binding mode 255, energy is 187.2636, rmsd is 48.382366
sib.fastconf.EADock3: Minimizing binding mode 256, energy is 187.39409, rmsd is 47.077118
sib.fastconf.EADock3: Minimizing binding mode 257, energy is 187.5418, rmsd is 2.6377006
sib.fastconf.EADock3: Minimizing binding mode 258, energy is 188.18527, rmsd is 34.176292
sib.fastconf.EADock3: Minimizing binding mode 259, energy is 188.20059, rmsd is 22.279005
sib.fastconf.EADock3: Minimizing binding mode 260, energy is 188.77232, rmsd is 43.50919
sib.fastconf.EADock3: Minimizing binding mode 261, energy is 188.83595, rmsd is 35.109245
sib.fastconf.EADock3: Minimizing binding mode 262, energy is 189.05396, rmsd is 33.382553
sib.fastconf.EADock3: Minimizing binding mode 263, energy is 189.672, rmsd is 2.7128212
sib.fastconf.EADock3: Minimizing binding mode 264, energy is 190.24054, rmsd is 44.25604
sib.fastconf.EADock3: Minimizing binding mode 265, energy is 190.34589, rmsd is 51.915573
sib.fastconf.EADock3: Minimizing binding mode 266, energy is 190.37355, rmsd is 3.0235353
sib.fastconf.EADock3: Minimizing binding mode 267, energy is 190.46904, rmsd is 28.063105
sib.fastconf.EADock3: Minimizing binding mode 268, energy is 190.63383, rmsd is 19.019629
sib.fastconf.EADock3: Minimizing binding mode 269, energy is 190.6686, rmsd is 20.281057
sib.fastconf.EADock3: Minimizing binding mode 270, energy is 190.89948, rmsd is 28.748795
sib.fastconf.EADock3: Minimizing binding mode 271, energy is 190.99165, rmsd is 23.613089
sib.fastconf.EADock3: Minimizing binding mode 272, energy is 191.0165, rmsd is 20.913322
sib.fastconf.EADock3: Minimizing binding mode 273, energy is 191.18584, rmsd is 46.671963
sib.fastconf.EADock3: Minimizing binding mode 274, energy is 191.35449, rmsd is 54.35674
sib.fastconf.EADock3: Minimizing binding mode 275, energy is 191.37851, rmsd is 21.92549
sib.fastconf.EADock3: Minimizing binding mode 276, energy is 191.44269, rmsd is 20.778463
sib.fastconf.EADock3: Minimizing binding mode 277, energy is 191.55759, rmsd is 52.24581
sib.fastconf.EADock3: Minimizing binding mode 278, energy is 191.76709, rmsd is 21.474426
sib.fastconf.EADock3: Minimizing binding mode 279, energy is 192.0649, rmsd is 22.13683
sib.fastconf.EADock3: Minimizing binding mode 280, energy is 192.40143, rmsd is 41.860817
sib.fastconf.EADock3: Minimizing binding mode 281, energy is 192.69476, rmsd is 2.9772227
sib.fastconf.EADock3: Minimizing binding mode 282, energy is 193.04156, rmsd is 47.983707
sib.fastconf.EADock3: Minimizing binding mode 283, energy is 193.18045, rmsd is 23.53243
sib.fastconf.EADock3: Minimizing binding mode 284, energy is 193.21689, rmsd is 52.733616
sib.fastconf.EADock3: Minimizing binding mode 285, energy is 193.49065, rmsd is 22.147474
sib.fastconf.EADock3: Minimizing binding mode 286, energy is 193.75441, rmsd is 3.1649349
sib.fastconf.EADock3: Minimizing binding mode 287, energy is 194.18701, rmsd is 34.1315
sib.fastconf.EADock3: Minimizing binding mode 288, energy is 194.2623, rmsd is 53.65655
sib.fastconf.EADock3: Minimizing binding mode 289, energy is 195.04741, rmsd is 2.8663454
sib.fastconf.EADock3: Minimizing binding mode 290, energy is 195.43611, rmsd is 42.855793
sib.fastconf.EADock3: Minimizing binding mode 291, energy is 195.51302, rmsd is 24.76979
sib.fastconf.EADock3: Minimizing binding mode 292, energy is 195.5461, rmsd is 39.880287
sib.fastconf.EADock3: Minimizing binding mode 293, energy is 195.56023, rmsd is 54.08276
sib.fastconf.EADock3: Minimizing binding mode 294, energy is 195.59535, rmsd is 36.048626
sib.fastconf.EADock3: Minimizing binding mode 295, energy is 195.63629, rmsd is 21.506866
sib.fastconf.EADock3: Minimizing binding mode 296, energy is 195.80211, rmsd is 29.072035
sib.fastconf.EADock3: Minimizing binding mode 297, energy is 195.99188, rmsd is 20.61057
sib.fastconf.EADock3: Minimizing binding mode 298, energy is 195.9982, rmsd is 21.451584
sib.fastconf.EADock3: Minimizing binding mode 299, energy is 196.18106, rmsd is 28.088276
sib.fastconf.EADock3: Minimizing binding mode 300, energy is 196.36063, rmsd is 20.076464
sib.fastconf.EADock3: Minimizing binding mode 301, energy is 196.49437, rmsd is 25.009705
sib.fastconf.EADock3: Minimizing binding mode 302, energy is 196.57637, rmsd is 21.482063
sib.fastconf.EADock3: Minimizing binding mode 303, energy is 197.51991, rmsd is 29.796652
sib.fastconf.EADock3: Minimizing binding mode 304, energy is 198.24954, rmsd is 44.402485
sib.fastconf.EADock3: Minimizing binding mode 305, energy is 198.37944, rmsd is 18.684824
sib.fastconf.EADock3: Minimizing binding mode 306, energy is 198.52878, rmsd is 23.213274
sib.fastconf.EADock3: Minimizing binding mode 307, energy is 198.61024, rmsd is 27.636484
sib.fastconf.EADock3: Minimizing binding mode 308, energy is 198.74496, rmsd is 37.81953
sib.fastconf.EADock3: Minimizing binding mode 309, energy is 199.18071, rmsd is 30.40021
sib.fastconf.EADock3: Minimizing binding mode 310, energy is 199.21242, rmsd is 52.093388
sib.fastconf.EADock3: Minimizing binding mode 311, energy is 200.1187, rmsd is 21.993269
sib.fastconf.EADock3: Minimizing binding mode 312, energy is 200.34532, rmsd is 46.418587
sib.fastconf.EADock3: Minimizing binding mode 313, energy is 200.69157, rmsd is 21.590769
sib.fastconf.EADock3: Minimizing binding mode 314, energy is 200.70644, rmsd is 40.099937
sib.fastconf.EADock3: Minimizing binding mode 315, energy is 200.88087, rmsd is 51.76518
sib.fastconf.EADock3: Minimizing binding mode 316, energy is 201.1462, rmsd is 3.6756935
sib.fastconf.EADock3: Minimizing binding mode 317, energy is 201.41782, rmsd is 23.487558
sib.fastconf.EADock3: Minimizing binding mode 318, energy is 201.49261, rmsd is 37.573803
sib.fastconf.EADock3: Minimizing binding mode 319, energy is 201.79123, rmsd is 24.589838
sib.fastconf.EADock3: Minimizing binding mode 320, energy is 201.8106, rmsd is 1.2239093
sib.fastconf.EADock3: Minimizing binding mode 321, energy is 201.85861, rmsd is 21.588537
sib.fastconf.EADock3: Minimizing binding mode 322, energy is 201.98045, rmsd is 47.30124
sib.fastconf.EADock3: Minimizing binding mode 323, energy is 201.98138, rmsd is 54.45363
sib.fastconf.EADock3: Minimizing binding mode 324, energy is 201.98502, rmsd is 19.500858
sib.fastconf.EADock3: Minimizing binding mode 325, energy is 202.1262, rmsd is 21.910446
sib.fastconf.EADock3: Minimizing binding mode 326, energy is 202.4205, rmsd is 3.543471
sib.fastconf.EADock3: Minimizing binding mode 327, energy is 202.70107, rmsd is 20.656763
sib.fastconf.EADock3: Minimizing binding mode 328, energy is 203.36179, rmsd is 25.532734
sib.fastconf.EADock3: Minimizing binding mode 329, energy is 203.45773, rmsd is 42.58051
sib.fastconf.EADock3: Minimizing binding mode 330, energy is 203.82436, rmsd is 24.31355
sib.fastconf.EADock3: Minimizing binding mode 331, energy is 203.86482, rmsd is 3.4193263
sib.fastconf.EADock3: Minimizing binding mode 332, energy is 203.90686, rmsd is 22.288702
sib.fastconf.EADock3: Minimizing binding mode 333, energy is 204.0262, rmsd is 3.000614
sib.fastconf.EADock3: Minimizing binding mode 334, energy is 204.95255, rmsd is 1.2409246
sib.fastconf.EADock3: Minimizing binding mode 335, energy is 205.15878, rmsd is 51.028175
sib.fastconf.EADock3: Minimizing binding mode 336, energy is 205.329, rmsd is 34.940712
sib.fastconf.EADock3: Minimizing binding mode 337, energy is 205.69951, rmsd is 26.04453
sib.fastconf.EADock3: Minimizing binding mode 338, energy is 205.78993, rmsd is 19.375908
sib.fastconf.EADock3: Minimizing binding mode 339, energy is 205.84157, rmsd is 3.1161125
sib.fastconf.EADock3: Minimizing binding mode 340, energy is 206.1828, rmsd is 29.205515
sib.fastconf.EADock3: Minimizing binding mode 341, energy is 206.41663, rmsd is 23.97168
sib.fastconf.EADock3: Minimizing binding mode 342, energy is 206.4976, rmsd is 1.9834177
sib.fastconf.EADock3: Minimizing binding mode 343, energy is 206.73288, rmsd is 24.103712
sib.fastconf.EADock3: Minimizing binding mode 344, energy is 206.8121, rmsd is 38.574375
sib.fastconf.EADock3: Minimizing binding mode 345, energy is 206.94879, rmsd is 24.67294
sib.fastconf.EADock3: Minimizing binding mode 346, energy is 206.99174, rmsd is 3.2445927
sib.fastconf.EADock3: Minimizing binding mode 347, energy is 207.00517, rmsd is 28.562654
sib.fastconf.EADock3: Minimizing binding mode 348, energy is 207.17871, rmsd is 2.7632759
sib.fastconf.EADock3: Minimizing binding mode 349, energy is 207.43936, rmsd is 52.58435
sib.fastconf.EADock3: Minimizing binding mode 350, energy is 208.11145, rmsd is 22.376925
sib.fastconf.EADock3: Minimizing binding mode 351, energy is 208.6442, rmsd is 49.41025
sib.fastconf.EADock3: Minimizing binding mode 352, energy is 208.76831, rmsd is 49.5324
sib.fastconf.EADock3: Minimizing binding mode 353, energy is 208.80766, rmsd is 23.022966
sib.fastconf.EADock3: Minimizing binding mode 354, energy is 208.8534, rmsd is 37.32663
sib.fastconf.EADock3: Minimizing binding mode 355, energy is 209.42345, rmsd is 23.250723
sib.fastconf.EADock3: Minimizing binding mode 356, energy is 209.58101, rmsd is 19.226728
sib.fastconf.EADock3: Minimizing binding mode 357, energy is 209.75906, rmsd is 1.0429074
sib.fastconf.EADock3: Minimizing binding mode 358, energy is 209.78404, rmsd is 20.880945
sib.fastconf.EADock3: Minimizing binding mode 359, energy is 209.83534, rmsd is 20.631046
sib.fastconf.EADock3: Minimizing binding mode 360, energy is 209.91954, rmsd is 33.734756
sib.fastconf.EADock3: Minimizing binding mode 361, energy is 210.08981, rmsd is 24.435165
sib.fastconf.EADock3: Minimizing binding mode 362, energy is 210.21283, rmsd is 20.43924
sib.fastconf.EADock3: Minimizing binding mode 363, energy is 210.23763, rmsd is 21.411654
sib.fastconf.EADock3: Minimizing binding mode 364, energy is 210.34064, rmsd is 49.78508
sib.fastconf.EADock3: Minimizing binding mode 365, energy is 210.82442, rmsd is 36.4798
sib.fastconf.EADock3: Minimizing binding mode 366, energy is 210.9332, rmsd is 24.090252
sib.fastconf.EADock3: Minimizing binding mode 367, energy is 211.13232, rmsd is 36.945652
sib.fastconf.EADock3: Minimizing binding mode 368, energy is 211.34637, rmsd is 22.120077
sib.fastconf.EADock3: Minimizing binding mode 369, energy is 211.67084, rmsd is 40.448376
sib.fastconf.EADock3: Minimizing binding mode 370, energy is 211.78052, rmsd is 19.618784
sib.fastconf.EADock3: Minimizing binding mode 371, energy is 211.8445, rmsd is 1.8666995
sib.fastconf.EADock3: Minimizing binding mode 372, energy is 211.89334, rmsd is 48.845825
sib.fastconf.EADock3: Minimizing binding mode 373, energy is 211.97345, rmsd is 42.857185
sib.fastconf.EADock3: Minimizing binding mode 374, energy is 212.0628, rmsd is 43.118176
sib.fastconf.EADock3: Minimizing binding mode 375, energy is 212.18391, rmsd is 28.203327
sib.fastconf.EADock3: Minimizing binding mode 376, energy is 212.27335, rmsd is 2.2081604
sib.fastconf.EADock3: Minimizing binding mode 377, energy is 212.47014, rmsd is 43.421425
sib.fastconf.EADock3: Minimizing binding mode 378, energy is 212.56564, rmsd is 54.84487
sib.fastconf.EADock3: Minimizing binding mode 379, energy is 212.66905, rmsd is 49.292595
sib.fastconf.EADock3: Minimizing binding mode 380, energy is 212.74576, rmsd is 19.834534
sib.fastconf.EADock3: Minimizing binding mode 381, energy is 213.07204, rmsd is 1.829867
sib.fastconf.EADock3: Minimizing binding mode 382, energy is 213.32056, rmsd is 43.663715
sib.fastconf.EADock3: Minimizing binding mode 383, energy is 213.35579, rmsd is 44.785152
sib.fastconf.EADock3: Minimizing binding mode 384, energy is 213.3644, rmsd is 47.776443
sib.fastconf.EADock3: Minimizing binding mode 385, energy is 213.66277, rmsd is 3.283355
sib.fastconf.EADock3: Minimizing binding mode 386, energy is 213.98409, rmsd is 19.624964
sib.fastconf.EADock3: Minimizing binding mode 387, energy is 214.17595, rmsd is 54.253613
sib.fastconf.EADock3: Minimizing binding mode 388, energy is 214.5633, rmsd is 52.383587
sib.fastconf.EADock3: Minimizing binding mode 389, energy is 214.60686, rmsd is 35.130913
sib.fastconf.EADock3: Minimizing binding mode 390, energy is 214.82661, rmsd is 36.32644
sib.fastconf.EADock3: Minimizing binding mode 391, energy is 215.32086, rmsd is 1.7740135
sib.fastconf.EADock3: Minimizing binding mode 392, energy is 215.3385, rmsd is 48.10384
sib.fastconf.EADock3: Minimizing binding mode 393, energy is 215.4425, rmsd is 34.348297
sib.fastconf.EADock3: Minimizing binding mode 394, energy is 215.48676, rmsd is 3.1426902
sib.fastconf.EADock3: Minimizing binding mode 395, energy is 215.82396, rmsd is 37.041763
sib.fastconf.EADock3: Minimizing binding mode 396, energy is 216.07191, rmsd is 35.80136
sib.fastconf.EADock3: Minimizing binding mode 397, energy is 216.14099, rmsd is 29.250486
sib.fastconf.EADock3: Minimizing binding mode 398, energy is 216.52026, rmsd is 34.956787
sib.fastconf.EADock3: Minimizing binding mode 399, energy is 216.68925, rmsd is 33.957993
sib.fastconf.EADock3: Minimizing binding mode 400, energy is 216.70703, rmsd is 3.1492646
sib.fastconf.EADock3: Minimizing binding mode 401, energy is 216.83035, rmsd is 35.195526
sib.fastconf.EADock3: Minimizing binding mode 402, energy is 217.1167, rmsd is 48.35767
sib.fastconf.EADock3: Minimizing binding mode 403, energy is 217.19624, rmsd is 2.9976764
sib.fastconf.EADock3: Minimizing binding mode 404, energy is 217.54886, rmsd is 51.656017
sib.fastconf.EADock3: Minimizing binding mode 405, energy is 217.64621, rmsd is 23.710882
sib.fastconf.EADock3: Minimizing binding mode 406, energy is 217.76494, rmsd is 29.369017
sib.fastconf.EADock3: Minimizing binding mode 407, energy is 217.87068, rmsd is 3.3824158
sib.fastconf.EADock3: Minimizing binding mode 408, energy is 217.99806, rmsd is 37.42307
sib.fastconf.EADock3: Minimizing binding mode 409, energy is 218.37994, rmsd is 53.45926
sib.fastconf.EADock3: Minimizing binding mode 410, energy is 218.48451, rmsd is 36.655045
sib.fastconf.EADock3: Minimizing binding mode 411, energy is 218.50378, rmsd is 37.808304
sib.fastconf.EADock3: Minimizing binding mode 412, energy is 218.66476, rmsd is 2.644072
sib.fastconf.EADock3: Minimizing binding mode 413, energy is 219.01617, rmsd is 39.98206
sib.fastconf.EADock3: Minimizing binding mode 414, energy is 219.05157, rmsd is 51.751163
sib.fastconf.EADock3: Minimizing binding mode 415, energy is 219.31258, rmsd is 18.825052
sib.fastconf.EADock3: Minimizing binding mode 416, energy is 219.35869, rmsd is 52.183582
sib.fastconf.EADock3: Minimizing binding mode 417, energy is 219.64328, rmsd is 21.588253
sib.fastconf.EADock3: Minimizing binding mode 418, energy is 219.67241, rmsd is 2.8596063
sib.fastconf.EADock3: Minimizing binding mode 419, energy is 219.8051, rmsd is 20.98249
sib.fastconf.EADock3: Minimizing binding mode 420, energy is 219.8563, rmsd is 40.61917
sib.fastconf.EADock3: Minimizing binding mode 421, energy is 219.86543, rmsd is 51.259804
sib.fastconf.EADock3: Minimizing binding mode 422, energy is 219.9523, rmsd is 45.434143
sib.fastconf.EADock3: Minimizing binding mode 423, energy is 220.16862, rmsd is 37.773987
sib.fastconf.EADock3: Minimizing binding mode 424, energy is 220.62288, rmsd is 51.364487
sib.fastconf.EADock3: Minimizing binding mode 425, energy is 220.6574, rmsd is 23.435421
sib.fastconf.EADock3: Minimizing binding mode 426, energy is 221.00009, rmsd is 28.025568
sib.fastconf.EADock3: Minimizing binding mode 427, energy is 221.0639, rmsd is 18.086327
sib.fastconf.EADock3: Minimizing binding mode 428, energy is 221.08308, rmsd is 21.542168
sib.fastconf.EADock3: Minimizing binding mode 429, energy is 221.33473, rmsd is 20.28833
sib.fastconf.EADock3: Minimizing binding mode 430, energy is 221.93388, rmsd is 3.4939015
sib.fastconf.EADock3: Minimizing binding mode 431, energy is 221.98407, rmsd is 3.048317
sib.fastconf.EADock3: Minimizing binding mode 432, energy is 222.10922, rmsd is 36.730385
sib.fastconf.EADock3: Minimizing binding mode 433, energy is 222.22531, rmsd is 42.593655
sib.fastconf.EADock3: Minimizing binding mode 434, energy is 222.26183, rmsd is 53.803474
sib.fastconf.EADock3: Minimizing binding mode 435, energy is 222.27641, rmsd is 46.585865
sib.fastconf.EADock3: Minimizing binding mode 436, energy is 222.65642, rmsd is 21.418066
sib.fastconf.EADock3: Minimizing binding mode 437, energy is 222.81143, rmsd is 29.318924
sib.fastconf.EADock3: Minimizing binding mode 438, energy is 222.97939, rmsd is 51.961678
sib.fastconf.EADock3: Minimizing binding mode 439, energy is 223.0375, rmsd is 54.60608
sib.fastconf.EADock3: Minimizing binding mode 440, energy is 223.27779, rmsd is 21.87016
sib.fastconf.EADock3: Minimizing binding mode 441, energy is 223.39241, rmsd is 3.2212238
sib.fastconf.EADock3: Minimizing binding mode 442, energy is 223.46544, rmsd is 19.070814
sib.fastconf.EADock3: Minimizing binding mode 443, energy is 224.58888, rmsd is 1.5509646
sib.fastconf.EADock3: Minimizing binding mode 444, energy is 224.68208, rmsd is 37.74963
sib.fastconf.EADock3: Minimizing binding mode 445, energy is 224.98827, rmsd is 3.3660114
sib.fastconf.EADock3: Minimizing binding mode 446, energy is 225.12619, rmsd is 2.604353
sib.fastconf.EADock3: Minimizing binding mode 447, energy is 225.13452, rmsd is 47.77908
sib.fastconf.EADock3: Minimizing binding mode 448, energy is 225.3593, rmsd is 25.666376
sib.fastconf.EADock3: Minimizing binding mode 449, energy is 225.41199, rmsd is 21.635992
sib.fastconf.EADock3: Minimizing binding mode 450, energy is 225.6636, rmsd is 21.159569
sib.fastconf.EADock3: Minimizing binding mode 451, energy is 225.68254, rmsd is 37.484646
sib.fastconf.EADock3: Minimizing binding mode 452, energy is 227.14886, rmsd is 53.791264
sib.fastconf.EADock3: Minimizing binding mode 453, energy is 227.30843, rmsd is 49.37628
sib.fastconf.EADock3: Minimizing binding mode 454, energy is 227.50926, rmsd is 26.342964
sib.fastconf.EADock3: Minimizing binding mode 455, energy is 227.74506, rmsd is 28.90024
sib.fastconf.EADock3: Minimizing binding mode 456, energy is 227.83653, rmsd is 53.648846
sib.fastconf.EADock3: Minimizing binding mode 457, energy is 228.36714, rmsd is 38.424713
sib.fastconf.EADock3: Minimizing binding mode 458, energy is 228.75714, rmsd is 29.612675
sib.fastconf.EADock3: Minimizing binding mode 459, energy is 228.97038, rmsd is 24.391737
sib.fastconf.EADock3: Minimizing binding mode 460, energy is 229.0415, rmsd is 44.318462
sib.fastconf.EADock3: Minimizing binding mode 461, energy is 229.20001, rmsd is 28.934847
sib.fastconf.EADock3: Minimizing binding mode 462, energy is 229.2569, rmsd is 19.460346
sib.fastconf.EADock3: Minimizing binding mode 463, energy is 229.80869, rmsd is 2.7697155
sib.fastconf.EADock3: Minimizing binding mode 464, energy is 230.3803, rmsd is 20.115982
sib.fastconf.EADock3: Minimizing binding mode 465, energy is 230.52115, rmsd is 50.92474
sib.fastconf.EADock3: Minimizing binding mode 466, energy is 230.78944, rmsd is 1.9018756
sib.fastconf.EADock3: Minimizing binding mode 467, energy is 230.80856, rmsd is 20.88578
sib.fastconf.EADock3: Minimizing binding mode 468, energy is 231.28311, rmsd is 39.496006
sib.fastconf.EADock3: Minimizing binding mode 469, energy is 231.3314, rmsd is 30.642616
sib.fastconf.EADock3: Minimizing binding mode 470, energy is 231.8693, rmsd is 2.3149977
sib.fastconf.EADock3: Minimizing binding mode 471, energy is 231.88539, rmsd is 39.423534
sib.fastconf.EADock3: Minimizing binding mode 472, energy is 232.01907, rmsd is 50.199516
sib.fastconf.EADock3: Minimizing binding mode 473, energy is 232.45863, rmsd is 25.263218
sib.fastconf.EADock3: Minimizing binding mode 474, energy is 232.5523, rmsd is 21.335918
sib.fastconf.EADock3: Minimizing binding mode 475, energy is 232.92595, rmsd is 29.213448
sib.fastconf.EADock3: Minimizing binding mode 476, energy is 232.93951, rmsd is 39.37287
sib.fastconf.EADock3: Minimizing binding mode 477, energy is 233.38992, rmsd is 48.28251
sib.fastconf.EADock3: Minimizing binding mode 478, energy is 233.53513, rmsd is 38.459522
sib.fastconf.EADock3: Minimizing binding mode 479, energy is 233.83664, rmsd is 55.776672
sib.fastconf.EADock3: Minimizing binding mode 480, energy is 234.25177, rmsd is 45.887764
sib.fastconf.EADock3: Minimizing binding mode 481, energy is 234.46227, rmsd is 39.544975
sib.fastconf.EADock3: Minimizing binding mode 482, energy is 234.57785, rmsd is 47.605167
sib.fastconf.EADock3: Minimizing binding mode 483, energy is 234.71205, rmsd is 35.25048
sib.fastconf.EADock3: Minimizing binding mode 484, energy is 234.74945, rmsd is 33.06559
sib.fastconf.EADock3: Minimizing binding mode 485, energy is 234.7641, rmsd is 32.010708
sib.fastconf.EADock3: Minimizing binding mode 486, energy is 234.81844, rmsd is 39.00183
sib.fastconf.EADock3: Minimizing binding mode 487, energy is 234.92752, rmsd is 48.322304
sib.fastconf.EADock3: Minimizing binding mode 488, energy is 235.1525, rmsd is 51.240456
sib.fastconf.EADock3: Minimizing binding mode 489, energy is 235.80295, rmsd is 51.890236
sib.fastconf.EADock3: Minimizing binding mode 490, energy is 236.24022, rmsd is 36.112106
sib.fastconf.EADock3: Minimizing binding mode 491, energy is 236.35957, rmsd is 52.018158
sib.fastconf.EADock3: Minimizing binding mode 492, energy is 236.49463, rmsd is 44.808846
sib.fastconf.EADock3: Minimizing binding mode 493, energy is 236.74149, rmsd is 2.1776242
sib.fastconf.EADock3: Minimizing binding mode 494, energy is 237.02457, rmsd is 19.830294
sib.fastconf.EADock3: Minimizing binding mode 495, energy is 237.19183, rmsd is 29.040758
sib.fastconf.EADock3: Minimizing binding mode 496, energy is 237.65102, rmsd is 1.5309483
sib.fastconf.EADock3: Minimizing binding mode 497, energy is 237.97745, rmsd is 23.148855
sib.fastconf.EADock3: Minimizing binding mode 498, energy is 238.45383, rmsd is 38.675842
sib.fastconf.EADock3: Minimizing binding mode 499, energy is 238.81168, rmsd is 38.775738
sib.fastconf.EADock3: Minimizing binding mode 500, energy is 238.96542, rmsd is 35.09286
sib.fastconf.EADock3: Minimizing binding mode 501, energy is 239.17558, rmsd is 22.736584
sib.fastconf.EADock3: Minimizing binding mode 502, energy is 239.37518, rmsd is 19.274727
sib.fastconf.EADock3: Minimizing binding mode 503, energy is 239.46422, rmsd is 54.9082
sib.fastconf.EADock3: Minimizing binding mode 504, energy is 239.62103, rmsd is 28.848045
sib.fastconf.EADock3: Minimizing binding mode 505, energy is 239.79214, rmsd is 2.4567823
sib.fastconf.EADock3: Minimizing binding mode 506, energy is 239.79343, rmsd is 3.2270763
sib.fastconf.EADock3: Minimizing binding mode 507, energy is 240.99852, rmsd is 54.609066
sib.fastconf.EADock3: Minimizing binding mode 508, energy is 241.01257, rmsd is 19.785696
sib.fastconf.EADock3: Minimizing binding mode 509, energy is 241.02919, rmsd is 27.649817
sib.fastconf.EADock3: Minimizing binding mode 510, energy is 241.08713, rmsd is 54.151165
sib.fastconf.EADock3: Minimizing binding mode 511, energy is 241.75093, rmsd is 21.469059
sib.fastconf.EADock3: Minimizing binding mode 512, energy is 241.9754, rmsd is 1.3997208
sib.fastconf.EADock3: Minimizing binding mode 513, energy is 242.36533, rmsd is 29.802143
sib.fastconf.EADock3: Minimizing binding mode 514, energy is 243.01878, rmsd is 34.537247
sib.fastconf.EADock3: Minimizing binding mode 515, energy is 243.05948, rmsd is 25.974997
sib.fastconf.EADock3: Minimizing binding mode 516, energy is 243.07018, rmsd is 28.84488
sib.fastconf.EADock3: Minimizing binding mode 517, energy is 243.13043, rmsd is 19.090107
sib.fastconf.EADock3: Minimizing binding mode 518, energy is 243.45088, rmsd is 35.87324
sib.fastconf.EADock3: Minimizing binding mode 519, energy is 243.74422, rmsd is 21.55739
sib.fastconf.EADock3: Minimizing binding mode 520, energy is 244.15337, rmsd is 3.10646
sib.fastconf.EADock3: Minimizing binding mode 521, energy is 244.26816, rmsd is 48.37088
sib.fastconf.EADock3: Minimizing binding mode 522, energy is 244.42126, rmsd is 40.428112
sib.fastconf.EADock3: Minimizing binding mode 523, energy is 245.03288, rmsd is 47.495483
sib.fastconf.EADock3: Minimizing binding mode 524, energy is 245.08244, rmsd is 22.442673
sib.fastconf.EADock3: Minimizing binding mode 525, energy is 245.59087, rmsd is 23.902939
sib.fastconf.EADock3: Minimizing binding mode 526, energy is 245.73865, rmsd is 48.62653
sib.fastconf.EADock3: Minimizing binding mode 527, energy is 245.80847, rmsd is 2.335099
sib.fastconf.EADock3: Minimizing binding mode 528, energy is 246.31087, rmsd is 33.941956
sib.fastconf.EADock3: Minimizing binding mode 529, energy is 246.35849, rmsd is 28.114676
sib.fastconf.EADock3: Minimizing binding mode 530, energy is 246.57713, rmsd is 21.062475
sib.fastconf.EADock3: Minimizing binding mode 531, energy is 246.58981, rmsd is 54.594135
sib.fastconf.EADock3: Minimizing binding mode 532, energy is 246.93573, rmsd is 43.804214
sib.fastconf.EADock3: Minimizing binding mode 533, energy is 247.32312, rmsd is 39.58925
sib.fastconf.EADock3: Minimizing binding mode 534, energy is 247.8263, rmsd is 2.867242
sib.fastconf.EADock3: Minimizing binding mode 535, energy is 247.92154, rmsd is 39.87621
sib.fastconf.EADock3: Minimizing binding mode 536, energy is 248.03296, rmsd is 34.34048
sib.fastconf.EADock3: Minimizing binding mode 537, energy is 248.16306, rmsd is 37.57865
sib.fastconf.EADock3: Minimizing binding mode 538, energy is 248.29529, rmsd is 44.265865
sib.fastconf.EADock3: Minimizing binding mode 539, energy is 248.323, rmsd is 24.03707
sib.fastconf.EADock3: Minimizing binding mode 540, energy is 248.39217, rmsd is 39.395306
sib.fastconf.EADock3: Minimizing binding mode 541, energy is 248.53018, rmsd is 2.11229
sib.fastconf.EADock3: Minimizing binding mode 542, energy is 248.62114, rmsd is 29.82581
sib.fastconf.EADock3: Minimizing binding mode 543, energy is 248.83511, rmsd is 19.570522
sib.fastconf.EADock3: Minimizing binding mode 544, energy is 248.90253, rmsd is 52.088444
sib.fastconf.EADock3: Minimizing binding mode 545, energy is 249.41896, rmsd is 27.771526
sib.fastconf.EADock3: Minimizing binding mode 546, energy is 249.6314, rmsd is 27.668789
sib.fastconf.EADock3: Minimizing binding mode 547, energy is 249.66315, rmsd is 49.849293
sib.fastconf.EADock3: Minimizing binding mode 548, energy is 249.75488, rmsd is 3.3779788
sib.fastconf.EADock3: Minimizing binding mode 549, energy is 249.91417, rmsd is 53.143627
sib.fastconf.EADock3: Minimizing binding mode 550, energy is 250.0328, rmsd is 46.5899
sib.fastconf.EADock3: Minimizing binding mode 551, energy is 250.14867, rmsd is 3.1896167
sib.fastconf.EADock3: Minimizing binding mode 552, energy is 250.32913, rmsd is 49.51724
sib.fastconf.EADock3: Minimizing binding mode 553, energy is 250.36703, rmsd is 51.803112
sib.fastconf.EADock3: Minimizing binding mode 554, energy is 250.36856, rmsd is 52.496094
sib.fastconf.EADock3: Minimizing binding mode 555, energy is 250.46391, rmsd is 54.84764
sib.fastconf.EADock3: Minimizing binding mode 556, energy is 250.62949, rmsd is 52.028214
sib.fastconf.EADock3: Minimizing binding mode 557, energy is 251.00656, rmsd is 1.3701158
sib.fastconf.EADock3: Minimizing binding mode 558, energy is 251.13783, rmsd is 2.118445
sib.fastconf.EADock3: Minimizing binding mode 559, energy is 251.39346, rmsd is 43.954727
sib.fastconf.EADock3: Minimizing binding mode 560, energy is 251.49466, rmsd is 20.65443
sib.fastconf.EADock3: Minimizing binding mode 561, energy is 251.54817, rmsd is 20.709263
sib.fastconf.EADock3: Minimizing binding mode 562, energy is 251.98752, rmsd is 3.357142
sib.fastconf.EADock3: Minimizing binding mode 563, energy is 252.47002, rmsd is 21.561022
sib.fastconf.EADock3: Minimizing binding mode 564, energy is 252.76587, rmsd is 21.133366
sib.fastconf.EADock3: Minimizing binding mode 565, energy is 253.39484, rmsd is 39.96646
sib.fastconf.EADock3: Minimizing binding mode 566, energy is 253.45866, rmsd is 27.844494
sib.fastconf.EADock3: Minimizing binding mode 567, energy is 253.48624, rmsd is 51.786873
sib.fastconf.EADock3: Minimizing binding mode 568, energy is 253.7709, rmsd is 2.4662838
sib.fastconf.EADock3: Minimizing binding mode 569, energy is 254.25317, rmsd is 28.923279
sib.fastconf.EADock3: Minimizing binding mode 570, energy is 254.33372, rmsd is 41.76559
sib.fastconf.EADock3: Minimizing binding mode 571, energy is 254.54501, rmsd is 44.664967
sib.fastconf.EADock3: Minimizing binding mode 572, energy is 254.7192, rmsd is 27.696472
sib.fastconf.EADock3: Minimizing binding mode 573, energy is 254.96559, rmsd is 3.2860765
sib.fastconf.EADock3: Minimizing binding mode 574, energy is 254.99915, rmsd is 22.372118
sib.fastconf.EADock3: Minimizing binding mode 575, energy is 255.62686, rmsd is 26.548647
sib.fastconf.EADock3: Minimizing binding mode 576, energy is 255.72481, rmsd is 33.821957
sib.fastconf.EADock3: Minimizing binding mode 577, energy is 255.76123, rmsd is 36.66437
sib.fastconf.EADock3: Minimizing binding mode 578, energy is 256.3141, rmsd is 23.989504
sib.fastconf.EADock3: Minimizing binding mode 579, energy is 257.17804, rmsd is 41.864754
sib.fastconf.EADock3: Minimizing binding mode 580, energy is 257.24536, rmsd is 54.20659
sib.fastconf.EADock3: Minimizing binding mode 581, energy is 257.33292, rmsd is 37.705463
sib.fastconf.EADock3: Minimizing binding mode 582, energy is 257.81702, rmsd is 3.3199198
sib.fastconf.EADock3: Minimizing binding mode 583, energy is 258.04492, rmsd is 27.647074
sib.fastconf.EADock3: Minimizing binding mode 584, energy is 258.0472, rmsd is 2.2424426
sib.fastconf.EADock3: Minimizing binding mode 585, energy is 258.40875, rmsd is 20.711653
sib.fastconf.EADock3: Minimizing binding mode 586, energy is 258.5255, rmsd is 36.441162
sib.fastconf.EADock3: Minimizing binding mode 587, energy is 258.53882, rmsd is 20.001009
sib.fastconf.EADock3: Minimizing binding mode 588, energy is 258.62085, rmsd is 1.1973734
sib.fastconf.EADock3: Minimizing binding mode 589, energy is 258.7445, rmsd is 28.726353
sib.fastconf.EADock3: Minimizing binding mode 590, energy is 258.92087, rmsd is 46.953293
sib.fastconf.EADock3: Minimizing binding mode 591, energy is 258.94437, rmsd is 38.42264
sib.fastconf.EADock3: Minimizing binding mode 592, energy is 259.14264, rmsd is 36.56197
sib.fastconf.EADock3: Minimizing binding mode 593, energy is 259.30853, rmsd is 29.03911
sib.fastconf.EADock3: Minimizing binding mode 594, energy is 259.49518, rmsd is 36.796146
sib.fastconf.EADock3: Minimizing binding mode 595, energy is 259.58362, rmsd is 21.040342
sib.fastconf.EADock3: Minimizing binding mode 596, energy is 260.0533, rmsd is 21.760708
sib.fastconf.EADock3: Minimizing binding mode 597, energy is 260.13336, rmsd is 1.9760144
sib.fastconf.EADock3: Minimizing binding mode 598, energy is 260.1995, rmsd is 50.050983
sib.fastconf.EADock3: Minimizing binding mode 599, energy is 260.2572, rmsd is 46.739414
sib.fastconf.EADock3: Minimizing binding mode 600, energy is 260.71622, rmsd is 44.49345
sib.fastconf.EADock3: Minimizing binding mode 601, energy is 260.78333, rmsd is 28.050404
sib.fastconf.EADock3: Minimizing binding mode 602, energy is 260.90546, rmsd is 34.74776
sib.fastconf.EADock3: Minimizing binding mode 603, energy is 261.07004, rmsd is 20.868923
sib.fastconf.EADock3: Minimizing binding mode 604, energy is 261.12564, rmsd is 52.461315
sib.fastconf.EADock3: Minimizing binding mode 605, energy is 261.22937, rmsd is 19.363003
sib.fastconf.EADock3: Minimizing binding mode 606, energy is 261.69513, rmsd is 37.10226
sib.fastconf.EADock3: Minimizing binding mode 607, energy is 261.70117, rmsd is 34.27471
sib.fastconf.EADock3: Minimizing binding mode 608, energy is 261.93875, rmsd is 34.768093
sib.fastconf.EADock3: Minimizing binding mode 609, energy is 262.04044, rmsd is 50.649406
sib.fastconf.EADock3: Minimizing binding mode 610, energy is 262.1589, rmsd is 33.420475
sib.fastconf.EADock3: Minimizing binding mode 611, energy is 262.60287, rmsd is 36.485924
sib.fastconf.EADock3: Minimizing binding mode 612, energy is 262.6058, rmsd is 47.087185
sib.fastconf.EADock3: Minimizing binding mode 613, energy is 262.6505, rmsd is 29.298632
sib.fastconf.EADock3: Minimizing binding mode 614, energy is 263.02383, rmsd is 40.9106
sib.fastconf.EADock3: Minimizing binding mode 615, energy is 263.3197, rmsd is 37.83097
sib.fastconf.EADock3: Minimizing binding mode 616, energy is 263.38464, rmsd is 28.716936
sib.fastconf.EADock3: Minimizing binding mode 617, energy is 263.59912, rmsd is 29.032711
sib.fastconf.EADock3: Minimizing binding mode 618, energy is 263.71368, rmsd is 28.126808
sib.fastconf.EADock3: Minimizing binding mode 619, energy is 263.93347, rmsd is 29.782173
sib.fastconf.EADock3: Minimizing binding mode 620, energy is 263.95798, rmsd is 47.583206
sib.fastconf.EADock3: Minimizing binding mode 621, energy is 264.1545, rmsd is 3.1100864
sib.fastconf.EADock3: Minimizing binding mode 622, energy is 264.15723, rmsd is 50.215282
sib.fastconf.EADock3: Minimizing binding mode 623, energy is 264.6164, rmsd is 42.535465
sib.fastconf.EADock3: Minimizing binding mode 624, energy is 264.80484, rmsd is 28.205324
sib.fastconf.EADock3: Minimizing binding mode 625, energy is 265.59903, rmsd is 29.057417
sib.fastconf.EADock3: Minimizing binding mode 626, energy is 265.6508, rmsd is 1.8844053
sib.fastconf.EADock3: Minimizing binding mode 627, energy is 265.93097, rmsd is 34.53449
sib.fastconf.EADock3: Minimizing binding mode 628, energy is 265.95074, rmsd is 22.417706
sib.fastconf.EADock3: Minimizing binding mode 629, energy is 266.1477, rmsd is 23.301785
sib.fastconf.EADock3: Minimizing binding mode 630, energy is 266.2525, rmsd is 50.930347
sib.fastconf.EADock3: Minimizing binding mode 631, energy is 266.42593, rmsd is 2.8240278
sib.fastconf.EADock3: Minimizing binding mode 632, energy is 266.81967, rmsd is 21.460583
sib.fastconf.EADock3: Minimizing binding mode 633, energy is 266.8405, rmsd is 2.990506
sib.fastconf.EADock3: Minimizing binding mode 634, energy is 266.9785, rmsd is 28.013903
sib.fastconf.EADock3: Minimizing binding mode 635, energy is 267.07922, rmsd is 21.547401
sib.fastconf.EADock3: Minimizing binding mode 636, energy is 267.12738, rmsd is 34.095146
sib.fastconf.EADock3: Minimizing binding mode 637, energy is 267.17773, rmsd is 33.98282
sib.fastconf.EADock3: Minimizing binding mode 638, energy is 267.2369, rmsd is 24.93157
sib.fastconf.EADock3: Minimizing binding mode 639, energy is 267.246, rmsd is 25.157793
sib.fastconf.EADock3: Minimizing binding mode 640, energy is 267.51953, rmsd is 44.265957
sib.fastconf.EADock3: Minimizing binding mode 641, energy is 268.01114, rmsd is 43.20987
sib.fastconf.EADock3: Minimizing binding mode 642, energy is 268.06018, rmsd is 23.24277
sib.fastconf.EADock3: Minimizing binding mode 643, energy is 268.32214, rmsd is 20.576864
sib.fastconf.EADock3: Minimizing binding mode 644, energy is 268.38992, rmsd is 2.5801623
sib.fastconf.EADock3: Minimizing binding mode 645, energy is 268.41333, rmsd is 3.3985584
sib.fastconf.EADock3: Minimizing binding mode 646, energy is 268.6133, rmsd is 54.306164
sib.fastconf.EADock3: Minimizing binding mode 647, energy is 269.0495, rmsd is 36.33165
sib.fastconf.EADock3: Minimizing binding mode 648, energy is 269.21906, rmsd is 3.3203285
sib.fastconf.EADock3: Minimizing binding mode 649, energy is 269.26645, rmsd is 1.7112442
sib.fastconf.EADock3: Minimizing binding mode 650, energy is 269.4586, rmsd is 36.020695
sib.fastconf.EADock3: Minimizing binding mode 651, energy is 269.5047, rmsd is 28.844677
sib.fastconf.EADock3: Minimizing binding mode 652, energy is 269.5169, rmsd is 39.17879
sib.fastconf.EADock3: Minimizing binding mode 653, energy is 269.61594, rmsd is 19.894447
sib.fastconf.EADock3: Minimizing binding mode 654, energy is 269.69528, rmsd is 24.949425
sib.fastconf.EADock3: Minimizing binding mode 655, energy is 269.94885, rmsd is 23.420471
sib.fastconf.EADock3: Minimizing binding mode 656, energy is 269.9923, rmsd is 39.16044
sib.fastconf.EADock3: Minimizing binding mode 657, energy is 270.0094, rmsd is 3.2095444
sib.fastconf.EADock3: Minimizing binding mode 658, energy is 270.10446, rmsd is 42.32916
sib.fastconf.EADock3: Minimizing binding mode 659, energy is 270.80753, rmsd is 25.091867
sib.fastconf.EADock3: Minimizing binding mode 660, energy is 270.99194, rmsd is 35.458317
sib.fastconf.EADock3: Minimizing binding mode 661, energy is 270.99536, rmsd is 43.565556
sib.fastconf.EADock3: Minimizing binding mode 662, energy is 271.07858, rmsd is 50.66362
sib.fastconf.EADock3: Minimizing binding mode 663, energy is 271.25046, rmsd is 24.743464
sib.fastconf.EADock3: Minimizing binding mode 664, energy is 271.6011, rmsd is 41.95982
sib.fastconf.EADock3: Minimizing binding mode 665, energy is 269.63995, rmsd is 1.5532583
sib.fastconf.EADock3: Minimizing binding mode 666, energy is 272.04852, rmsd is 47.038284
sib.fastconf.EADock3: Minimizing binding mode 667, energy is 272.28433, rmsd is 53.27578
sib.fastconf.EADock3: Minimizing binding mode 668, energy is 272.3012, rmsd is 33.657246
sib.fastconf.EADock3: Minimizing binding mode 669, energy is 272.3317, rmsd is 46.914055
sib.fastconf.EADock3: Minimizing binding mode 670, energy is 272.44366, rmsd is 34.18932
sib.fastconf.EADock3: Minimizing binding mode 671, energy is 272.4469, rmsd is 33.85087
sib.fastconf.EADock3: Minimizing binding mode 672, energy is 272.66235, rmsd is 2.8564277
sib.fastconf.EADock3: Minimizing binding mode 673, energy is 272.67035, rmsd is 3.136949
sib.fastconf.EADock3: Minimizing binding mode 674, energy is 272.7134, rmsd is 19.066517
sib.fastconf.EADock3: Minimizing binding mode 675, energy is 273.02765, rmsd is 50.712574
sib.fastconf.EADock3: Minimizing binding mode 676, energy is 273.06052, rmsd is 42.194206
sib.fastconf.EADock3: Minimizing binding mode 677, energy is 273.32913, rmsd is 2.3191009
sib.fastconf.EADock3: Minimizing binding mode 678, energy is 273.40106, rmsd is 28.174639
sib.fastconf.EADock3: Minimizing binding mode 679, energy is 273.8433, rmsd is 19.338186
sib.fastconf.EADock3: Minimizing binding mode 680, energy is 274.34808, rmsd is 37.296448
sib.fastconf.EADock3: Minimizing binding mode 681, energy is 275.06686, rmsd is 50.792812
sib.fastconf.EADock3: Minimizing binding mode 682, energy is 275.36777, rmsd is 38.187275
sib.fastconf.EADock3: Minimizing binding mode 683, energy is 275.49536, rmsd is 34.962547
sib.fastconf.EADock3: Minimizing binding mode 684, energy is 276.09802, rmsd is 29.630083
sib.fastconf.EADock3: Minimizing binding mode 685, energy is 276.09802, rmsd is 51.6544
sib.fastconf.EADock3: Minimizing binding mode 686, energy is 276.42447, rmsd is 19.550646
sib.fastconf.EADock3: Minimizing binding mode 687, energy is 277.01202, rmsd is 22.358063
sib.fastconf.EADock3: Minimizing binding mode 688, energy is 277.0885, rmsd is 19.375956
sib.fastconf.EADock3: Minimizing binding mode 689, energy is 277.1975, rmsd is 26.02214
sib.fastconf.EADock3: Minimizing binding mode 690, energy is 277.60458, rmsd is 26.799864
sib.fastconf.EADock3: Minimizing binding mode 691, energy is 277.76254, rmsd is 38.352997
sib.fastconf.EADock3: Minimizing binding mode 692, energy is 278.23306, rmsd is 48.016598
sib.fastconf.EADock3: Minimizing binding mode 693, energy is 278.39044, rmsd is 42.036438
sib.fastconf.EADock3: Minimizing binding mode 694, energy is 278.45703, rmsd is 3.5131652
sib.fastconf.EADock3: Minimizing binding mode 695, energy is 278.50354, rmsd is 50.77
sib.fastconf.EADock3: Minimizing binding mode 696, energy is 278.7125, rmsd is 25.02866
sib.fastconf.EADock3: Minimizing binding mode 697, energy is 278.74762, rmsd is 36.268238
sib.fastconf.EADock3: Minimizing binding mode 698, energy is 279.16492, rmsd is 28.938799
sib.fastconf.EADock3: Minimizing binding mode 699, energy is 279.55746, rmsd is 19.28967
sib.fastconf.EADock3: Minimizing binding mode 700, energy is 279.62726, rmsd is 23.92264
sib.fastconf.EADock3: Minimizing binding mode 701, energy is 280.00092, rmsd is 45.39477
sib.fastconf.EADock3: Minimizing binding mode 702, energy is 280.0596, rmsd is 35.550503
sib.fastconf.EADock3: Minimizing binding mode 703, energy is 280.06732, rmsd is 19.974855
sib.fastconf.EADock3: Minimizing binding mode 704, energy is 280.9614, rmsd is 21.65521
sib.fastconf.EADock3: Minimizing binding mode 705, energy is 281.3215, rmsd is 45.436123
sib.fastconf.EADock3: Minimizing binding mode 706, energy is 281.48828, rmsd is 28.913284
sib.fastconf.EADock3: Minimizing binding mode 707, energy is 281.641, rmsd is 36.359783
sib.fastconf.EADock3: Minimizing binding mode 708, energy is 281.81473, rmsd is 22.362743
sib.fastconf.EADock3: Minimizing binding mode 709, energy is 281.95187, rmsd is 51.91319
sib.fastconf.EADock3: Minimizing binding mode 710, energy is 281.9631, rmsd is 22.635368
sib.fastconf.EADock3: Minimizing binding mode 711, energy is 282.0186, rmsd is 30.033152
sib.fastconf.EADock3: Minimizing binding mode 712, energy is 282.0502, rmsd is 49.02906
sib.fastconf.EADock3: Minimizing binding mode 713, energy is 282.14615, rmsd is 22.95734
sib.fastconf.EADock3: Minimizing binding mode 714, energy is 282.3193, rmsd is 3.0269122
sib.fastconf.EADock3: Minimizing binding mode 715, energy is 282.4259, rmsd is 2.0025973
sib.fastconf.EADock3: Minimizing binding mode 716, energy is 283.20227, rmsd is 28.50106
sib.fastconf.EADock3: Minimizing binding mode 717, energy is 283.25452, rmsd is 45.887028
sib.fastconf.EADock3: Minimizing binding mode 718, energy is 283.50415, rmsd is 21.642971
sib.fastconf.EADock3: Minimizing binding mode 719, energy is 284.37875, rmsd is 46.280212
sib.fastconf.EADock3: Minimizing binding mode 720, energy is 284.4956, rmsd is 36.047325
sib.fastconf.EADock3: Minimizing binding mode 721, energy is 284.58356, rmsd is 42.129242
sib.fastconf.EADock3: Minimizing binding mode 722, energy is 284.98514, rmsd is 51.724327
sib.fastconf.EADock3: Minimizing binding mode 723, energy is 285.0125, rmsd is 23.14808
sib.fastconf.EADock3: Minimizing binding mode 724, energy is 285.32013, rmsd is 22.665485
sib.fastconf.EADock3: Minimizing binding mode 725, energy is 285.4476, rmsd is 23.734945
sib.fastconf.EADock3: Minimizing binding mode 726, energy is 285.52036, rmsd is 20.078527
sib.fastconf.EADock3: Minimizing binding mode 727, energy is 285.55408, rmsd is 39.630016
sib.fastconf.EADock3: Minimizing binding mode 728, energy is 285.70172, rmsd is 22.601774
sib.fastconf.EADock3: Minimizing binding mode 729, energy is 285.90967, rmsd is 2.9286625
sib.fastconf.EADock3: Minimizing binding mode 730, energy is 286.12952, rmsd is 1.1024576
sib.fastconf.EADock3: Minimizing binding mode 731, energy is 286.19095, rmsd is 49.668236
sib.fastconf.EADock3: Minimizing binding mode 732, energy is 286.37115, rmsd is 35.013607
sib.fastconf.EADock3: Minimizing binding mode 733, energy is 286.41785, rmsd is 33.38718
sib.fastconf.EADock3: Minimizing binding mode 734, energy is 286.95032, rmsd is 23.87382
sib.fastconf.EADock3: Minimizing binding mode 735, energy is 287.01086, rmsd is 52.34494
sib.fastconf.EADock3: Minimizing binding mode 736, energy is 287.0298, rmsd is 2.6025593
sib.fastconf.EADock3: Minimizing binding mode 737, energy is 287.03632, rmsd is 51.402145
sib.fastconf.EADock3: Minimizing binding mode 738, energy is 287.18173, rmsd is 49.910378
sib.fastconf.EADock3: Minimizing binding mode 739, energy is 287.28296, rmsd is 40.58314
sib.fastconf.EADock3: Minimizing binding mode 740, energy is 287.8369, rmsd is 51.02977
sib.fastconf.EADock3: Minimizing binding mode 741, energy is 287.95728, rmsd is 36.71195
sib.fastconf.EADock3: Minimizing binding mode 742, energy is 288.0399, rmsd is 34.67248
sib.fastconf.EADock3: Minimizing binding mode 743, energy is 288.126, rmsd is 3.0091183
sib.fastconf.EADock3: Minimizing binding mode 744, energy is 288.14246, rmsd is 19.679022
sib.fastconf.EADock3: Minimizing binding mode 745, energy is 288.66504, rmsd is 34.60762
sib.fastconf.EADock3: Minimizing binding mode 746, energy is 288.71564, rmsd is 43.98034
sib.fastconf.EADock3: Minimizing binding mode 747, energy is 289.21884, rmsd is 52.364697
sib.fastconf.EADock3: Minimizing binding mode 748, energy is 289.32974, rmsd is 22.369995
sib.fastconf.EADock3: Minimizing binding mode 749, energy is 289.81927, rmsd is 22.22108
sib.fastconf.EADock3: Minimizing binding mode 750, energy is 289.92075, rmsd is 50.51326
sib.fastconf.EADock3: Minimizing binding mode 751, energy is 290.06198, rmsd is 59.573944
sib.fastconf.EADock3: Minimizing binding mode 752, energy is 290.28204, rmsd is 50.10256
sib.fastconf.EADock3: Minimizing binding mode 753, energy is 290.3851, rmsd is 20.73133
sib.fastconf.EADock3: Minimizing binding mode 754, energy is 290.4937, rmsd is 20.724049
sib.fastconf.EADock3: Minimizing binding mode 755, energy is 290.56818, rmsd is 49.525562
sib.fastconf.EADock3: Minimizing binding mode 756, energy is 290.98346, rmsd is 24.8091
sib.fastconf.EADock3: Minimizing binding mode 757, energy is 291.22433, rmsd is 34.239388
sib.fastconf.EADock3: Minimizing binding mode 758, energy is 291.33728, rmsd is 20.719397
sib.fastconf.EADock3: Minimizing binding mode 759, energy is 291.35208, rmsd is 38.95225
sib.fastconf.EADock3: Minimizing binding mode 760, energy is 291.3724, rmsd is 51.42693
sib.fastconf.EADock3: Minimizing binding mode 761, energy is 291.40552, rmsd is 1.4400586
sib.fastconf.EADock3: Minimizing binding mode 762, energy is 291.72183, rmsd is 49.119198
sib.fastconf.EADock3: Minimizing binding mode 763, energy is 291.81958, rmsd is 53.21484
sib.fastconf.EADock3: Minimizing binding mode 764, energy is 291.8574, rmsd is 54.118515
sib.fastconf.EADock3: Minimizing binding mode 765, energy is 291.89566, rmsd is 21.036137
sib.fastconf.EADock3: Minimizing binding mode 766, energy is 292.10278, rmsd is 21.839481
sib.fastconf.EADock3: Minimizing binding mode 767, energy is 292.29312, rmsd is 37.298645
sib.fastconf.EADock3: Minimizing binding mode 768, energy is 293.343, rmsd is 1.3941864
sib.fastconf.EADock3: Minimizing binding mode 769, energy is 294.25372, rmsd is 27.288795
sib.fastconf.EADock3: Minimizing binding mode 770, energy is 294.34927, rmsd is 50.095165
sib.fastconf.EADock3: Minimizing binding mode 771, energy is 295.09042, rmsd is 44.014977
sib.fastconf.EADock3: Minimizing binding mode 772, energy is 295.2626, rmsd is 29.587273
sib.fastconf.EADock3: Minimizing binding mode 773, energy is 295.37854, rmsd is 22.943653
sib.fastconf.EADock3: Minimizing binding mode 774, energy is 295.7321, rmsd is 21.319054
sib.fastconf.EADock3: Minimizing binding mode 775, energy is 296.00397, rmsd is 20.615744
sib.fastconf.EADock3: Minimizing binding mode 776, energy is 296.4726, rmsd is 28.672054
sib.fastconf.EADock3: Minimizing binding mode 777, energy is 296.64294, rmsd is 48.151535
sib.fastconf.EADock3: Minimizing binding mode 778, energy is 297.3361, rmsd is 20.979153
sib.fastconf.EADock3: Minimizing binding mode 779, energy is 297.96765, rmsd is 53.673416
sib.fastconf.EADock3: Minimizing binding mode 780, energy is 298.7847, rmsd is 45.815105
sib.fastconf.EADock3: Minimizing binding mode 781, energy is 299.0092, rmsd is 24.479553
sib.fastconf.EADock3: Minimizing binding mode 782, energy is 299.08344, rmsd is 46.113434
sib.fastconf.EADock3: Minimizing binding mode 783, energy is 299.25436, rmsd is 1.7515343
sib.fastconf.EADock3: Minimizing binding mode 784, energy is 299.33078, rmsd is 51.523026
sib.fastconf.EADock3: Minimizing binding mode 785, energy is 299.58148, rmsd is 28.16001
sib.fastconf.EADock3: Minimizing binding mode 786, energy is 299.61325, rmsd is 37.27936
sib.fastconf.EADock3: Minimizing binding mode 787, energy is 299.66962, rmsd is 34.815807
sib.fastconf.EADock3: Minimizing binding mode 788, energy is 299.92438, rmsd is 20.200008
sib.fastconf.EADock3: Minimizing binding mode 789, energy is 300.05313, rmsd is 36.778976
sib.fastconf.EADock3: Minimizing binding mode 790, energy is 300.2106, rmsd is 21.119251
sib.fastconf.EADock3: Minimizing binding mode 791, energy is 300.30222, rmsd is 53.031704
sib.fastconf.EADock3: Minimizing binding mode 792, energy is 300.56418, rmsd is 33.20738
sib.fastconf.EADock3: Minimizing binding mode 793, energy is 300.66083, rmsd is 45.924706
sib.fastconf.EADock3: Minimizing binding mode 794, energy is 300.9522, rmsd is 49.394867
sib.fastconf.EADock3: Minimizing binding mode 795, energy is 301.09927, rmsd is 28.652193
sib.fastconf.EADock3: Minimizing binding mode 796, energy is 301.17883, rmsd is 3.4129133
sib.fastconf.EADock3: Minimizing binding mode 797, energy is 301.64682, rmsd is 3.1413832
sib.fastconf.EADock3: Minimizing binding mode 798, energy is 301.83426, rmsd is 43.34784
sib.fastconf.EADock3: Minimizing binding mode 799, energy is 301.8489, rmsd is 24.878906
sib.fastconf.EADock3: Minimizing binding mode 800, energy is 301.86246, rmsd is 34.944607
sib.fastconf.EADock3: Minimizing binding mode 801, energy is 302.25653, rmsd is 2.5570514
sib.fastconf.EADock3: Minimizing binding mode 802, energy is 302.28134, rmsd is 3.4127429
sib.fastconf.EADock3: Minimizing binding mode 803, energy is 303.33206, rmsd is 22.29833
sib.fastconf.EADock3: Minimizing binding mode 804, energy is 303.44095, rmsd is 29.184666
sib.fastconf.EADock3: Minimizing binding mode 805, energy is 303.91788, rmsd is 34.202652
sib.fastconf.EADock3: Minimizing binding mode 806, energy is 304.0414, rmsd is 51.600395
sib.fastconf.EADock3: Minimizing binding mode 807, energy is 304.08893, rmsd is 22.716486
sib.fastconf.EADock3: Minimizing binding mode 808, energy is 304.38828, rmsd is 44.55149
sib.fastconf.EADock3: Minimizing binding mode 809, energy is 304.40955, rmsd is 43.220196
sib.fastconf.EADock3: Minimizing binding mode 810, energy is 304.80154, rmsd is 49.883827
sib.fastconf.EADock3: Minimizing binding mode 811, energy is 305.0212, rmsd is 55.626842
sib.fastconf.EADock3: Minimizing binding mode 812, energy is 305.05115, rmsd is 1.8574784
sib.fastconf.EADock3: Minimizing binding mode 813, energy is 305.25336, rmsd is 54.143776
sib.fastconf.EADock3: Minimizing binding mode 814, energy is 305.6056, rmsd is 45.447266
sib.fastconf.EADock3: Minimizing binding mode 815, energy is 305.66995, rmsd is 38.66425
sib.fastconf.EADock3: Minimizing binding mode 816, energy is 306.17438, rmsd is 46.79243
sib.fastconf.EADock3: Minimizing binding mode 817, energy is 306.21033, rmsd is 29.099936
sib.fastconf.EADock3: Minimizing binding mode 818, energy is 306.212, rmsd is 29.43028
sib.fastconf.EADock3: Minimizing binding mode 819, energy is 306.552, rmsd is 21.548592
sib.fastconf.EADock3: Minimizing binding mode 820, energy is 306.5957, rmsd is 33.296177
sib.fastconf.EADock3: Minimizing binding mode 821, energy is 306.64667, rmsd is 35.829655
sib.fastconf.EADock3: Minimizing binding mode 822, energy is 307.2409, rmsd is 35.095493
sib.fastconf.EADock3: Minimizing binding mode 823, energy is 307.24115, rmsd is 2.5532892
sib.fastconf.EADock3: Minimizing binding mode 824, energy is 307.33554, rmsd is 50.615314
sib.fastconf.EADock3: Minimizing binding mode 825, energy is 307.67197, rmsd is 21.92787
sib.fastconf.EADock3: Minimizing binding mode 826, energy is 307.8159, rmsd is 2.0921519
sib.fastconf.EADock3: Minimizing binding mode 827, energy is 307.90488, rmsd is 28.56726
sib.fastconf.EADock3: Minimizing binding mode 828, energy is 308.00323, rmsd is 51.46869
sib.fastconf.EADock3: Minimizing binding mode 829, energy is 308.02194, rmsd is 32.921303
sib.fastconf.EADock3: Minimizing binding mode 830, energy is 308.34164, rmsd is 34.459812
sib.fastconf.EADock3: Minimizing binding mode 831, energy is 308.40775, rmsd is 21.658785
sib.fastconf.EADock3: Minimizing binding mode 832, energy is 308.6177, rmsd is 50.54594
sib.fastconf.EADock3: Minimizing binding mode 833, energy is 308.86328, rmsd is 3.416067
sib.fastconf.EADock3: Minimizing binding mode 834, energy is 309.07632, rmsd is 28.63564
sib.fastconf.EADock3: Minimizing binding mode 835, energy is 309.24316, rmsd is 46.099743
sib.fastconf.EADock3: Minimizing binding mode 836, energy is 310.13174, rmsd is 21.543173
sib.fastconf.EADock3: Minimizing binding mode 837, energy is 310.78778, rmsd is 27.255371
sib.fastconf.EADock3: Minimizing binding mode 838, energy is 311.47754, rmsd is 22.344091
sib.fastconf.EADock3: Minimizing binding mode 839, energy is 311.59454, rmsd is 44.075016
sib.fastconf.EADock3: Minimizing binding mode 840, energy is 311.7385, rmsd is 28.208447
sib.fastconf.EADock3: Minimizing binding mode 841, energy is 311.79312, rmsd is 53.430904
sib.fastconf.EADock3: Minimizing binding mode 842, energy is 311.79938, rmsd is 1.5993084
sib.fastconf.EADock3: Minimizing binding mode 843, energy is 312.9918, rmsd is 39.84967
sib.fastconf.EADock3: Minimizing binding mode 844, energy is 313.09866, rmsd is 21.403202
sib.fastconf.EADock3: Minimizing binding mode 845, energy is 314.28464, rmsd is 23.074913
sib.fastconf.EADock3: Minimizing binding mode 846, energy is 314.66614, rmsd is 20.640345
sib.fastconf.EADock3: Minimizing binding mode 847, energy is 314.76956, rmsd is 34.854706
sib.fastconf.EADock3: Minimizing binding mode 848, energy is 314.8903, rmsd is 20.998514
sib.fastconf.EADock3: Minimizing binding mode 849, energy is 315.09393, rmsd is 20.756947
sib.fastconf.EADock3: Minimizing binding mode 850, energy is 315.38867, rmsd is 42.825092
sib.fastconf.EADock3: Minimizing binding mode 851, energy is 315.38916, rmsd is 21.589716
sib.fastconf.EADock3: Minimizing binding mode 852, energy is 315.50717, rmsd is 47.987534
sib.fastconf.EADock3: Minimizing binding mode 853, energy is 315.5122, rmsd is 1.5533915
sib.fastconf.EADock3: Minimizing binding mode 854, energy is 316.3125, rmsd is 34.73749
sib.fastconf.EADock3: Minimizing binding mode 855, energy is 316.45544, rmsd is 1.9769529
sib.fastconf.EADock3: Minimizing binding mode 856, energy is 316.47443, rmsd is 23.478754
sib.fastconf.EADock3: Minimizing binding mode 857, energy is 316.81842, rmsd is 51.073326
sib.fastconf.EADock3: Minimizing binding mode 858, energy is 316.90567, rmsd is 51.61091
sib.fastconf.EADock3: Minimizing binding mode 859, energy is 316.9878, rmsd is 40.33983
sib.fastconf.EADock3: Minimizing binding mode 860, energy is 317.1405, rmsd is 50.598495
sib.fastconf.EADock3: Minimizing binding mode 861, energy is 317.256, rmsd is 28.050581
sib.fastconf.EADock3: Minimizing binding mode 862, energy is 318.0422, rmsd is 24.279366
sib.fastconf.EADock3: Minimizing binding mode 863, energy is 318.0646, rmsd is 44.13545
sib.fastconf.EADock3: Minimizing binding mode 864, energy is 318.17078, rmsd is 43.34352
sib.fastconf.EADock3: Minimizing binding mode 865, energy is 318.29544, rmsd is 23.583288
sib.fastconf.EADock3: Minimizing binding mode 866, energy is 318.3419, rmsd is 35.305473
sib.fastconf.EADock3: Minimizing binding mode 867, energy is 319.0542, rmsd is 45.36963
sib.fastconf.EADock3: Minimizing binding mode 868, energy is 319.38593, rmsd is 25.30423
sib.fastconf.EADock3: Minimizing binding mode 869, energy is 319.4124, rmsd is 20.796873
sib.fastconf.EADock3: Minimizing binding mode 870, energy is 319.74515, rmsd is 29.366123
sib.fastconf.EADock3: Minimizing binding mode 871, energy is 320.30435, rmsd is 52.57889
sib.fastconf.EADock3: Minimizing binding mode 872, energy is 320.513, rmsd is 27.981094
sib.fastconf.EADock3: Minimizing binding mode 873, energy is 320.74487, rmsd is 3.3942356
sib.fastconf.EADock3: Minimizing binding mode 874, energy is 321.16287, rmsd is 52.467827
sib.fastconf.EADock3: Minimizing binding mode 875, energy is 321.6156, rmsd is 37.943153
sib.fastconf.EADock3: Minimizing binding mode 876, energy is 321.8607, rmsd is 3.7214024
sib.fastconf.EADock3: Minimizing binding mode 877, energy is 321.9494, rmsd is 28.316578
sib.fastconf.EADock3: Minimizing binding mode 878, energy is 321.9652, rmsd is 38.941547
sib.fastconf.EADock3: Minimizing binding mode 879, energy is 322.33862, rmsd is 48.958153
sib.fastconf.EADock3: Minimizing binding mode 880, energy is 322.37265, rmsd is 49.181347
sib.fastconf.EADock3: Minimizing binding mode 881, energy is 322.49448, rmsd is 38.596725
sib.fastconf.EADock3: Minimizing binding mode 882, energy is 322.5463, rmsd is 28.481033
sib.fastconf.EADock3: Minimizing binding mode 883, energy is 322.683, rmsd is 24.280682
sib.fastconf.EADock3: Minimizing binding mode 884, energy is 322.81165, rmsd is 25.041647
sib.fastconf.EADock3: Minimizing binding mode 885, energy is 323.2974, rmsd is 53.571815
sib.fastconf.EADock3: Minimizing binding mode 886, energy is 323.606, rmsd is 37.948406
sib.fastconf.EADock3: Minimizing binding mode 887, energy is 323.74432, rmsd is 28.638435
sib.fastconf.EADock3: Minimizing binding mode 888, energy is 323.96866, rmsd is 49.65046
sib.fastconf.EADock3: Minimizing binding mode 889, energy is 324.27747, rmsd is 50.814583
sib.fastconf.EADock3: Minimizing binding mode 890, energy is 324.33673, rmsd is 53.078903
sib.fastconf.EADock3: Minimizing binding mode 891, energy is 324.37115, rmsd is 36.824284
sib.fastconf.EADock3: Minimizing binding mode 892, energy is 324.5172, rmsd is 21.331291
sib.fastconf.EADock3: Minimizing binding mode 893, energy is 324.53998, rmsd is 3.2912834
sib.fastconf.EADock3: Minimizing binding mode 894, energy is 324.62897, rmsd is 22.203735
sib.fastconf.EADock3: Minimizing binding mode 895, energy is 324.78305, rmsd is 46.500954
sib.fastconf.EADock3: Minimizing binding mode 896, energy is 324.98846, rmsd is 2.99415
sib.fastconf.EADock3: Minimizing binding mode 897, energy is 325.398, rmsd is 33.936863
sib.fastconf.EADock3: Minimizing binding mode 898, energy is 325.70996, rmsd is 36.275143
sib.fastconf.EADock3: Minimizing binding mode 899, energy is 326.02744, rmsd is 2.2859726
sib.fastconf.EADock3: Minimizing binding mode 900, energy is 326.10608, rmsd is 32.85059
sib.fastconf.EADock3: Minimizing binding mode 901, energy is 326.26385, rmsd is 24.5774
sib.fastconf.EADock3: Minimizing binding mode 902, energy is 326.39322, rmsd is 46.96739
sib.fastconf.EADock3: Minimizing binding mode 903, energy is 326.91263, rmsd is 39.342785
sib.fastconf.EADock3: Minimizing binding mode 904, energy is 327.04327, rmsd is 2.801464
sib.fastconf.EADock3: Minimizing binding mode 905, energy is 327.0488, rmsd is 20.592506
sib.fastconf.EADock3: Minimizing binding mode 906, energy is 327.20502, rmsd is 21.490702
sib.fastconf.EADock3: Minimizing binding mode 907, energy is 327.43375, rmsd is 37.63196
sib.fastconf.EADock3: Minimizing binding mode 908, energy is 327.70078, rmsd is 1.9376223
sib.fastconf.EADock3: Minimizing binding mode 909, energy is 327.77628, rmsd is 51.76307
sib.fastconf.EADock3: Minimizing binding mode 910, energy is 328.2162, rmsd is 39.122562
sib.fastconf.EADock3: Minimizing binding mode 911, energy is 328.30005, rmsd is 21.261507
sib.fastconf.EADock3: Minimizing binding mode 912, energy is 328.32092, rmsd is 53.052887
sib.fastconf.EADock3: Minimizing binding mode 913, energy is 328.4794, rmsd is 51.657917
sib.fastconf.EADock3: Minimizing binding mode 914, energy is 328.50906, rmsd is 54.002995
sib.fastconf.EADock3: Minimizing binding mode 915, energy is 328.74954, rmsd is 21.831663
sib.fastconf.EADock3: Minimizing binding mode 916, energy is 328.75333, rmsd is 48.341526
sib.fastconf.EADock3: Minimizing binding mode 917, energy is 328.80505, rmsd is 53.121136
sib.fastconf.EADock3: Minimizing binding mode 918, energy is 328.82355, rmsd is 54.050476
sib.fastconf.EADock3: Minimizing binding mode 919, energy is 328.8477, rmsd is 23.184874
sib.fastconf.EADock3: Minimizing binding mode 920, energy is 328.96008, rmsd is 48.62004
sib.fastconf.EADock3: Minimizing binding mode 921, energy is 328.96655, rmsd is 29.824274
sib.fastconf.EADock3: Minimizing binding mode 922, energy is 329.0577, rmsd is 2.3467917
sib.fastconf.EADock3: Minimizing binding mode 923, energy is 329.40616, rmsd is 2.5583344
sib.fastconf.EADock3: Minimizing binding mode 924, energy is 329.45905, rmsd is 33.352966
sib.fastconf.EADock3: Minimizing binding mode 925, energy is 329.52634, rmsd is 21.077017
sib.fastconf.EADock3: Minimizing binding mode 926, energy is 329.6236, rmsd is 21.741592
sib.fastconf.EADock3: Minimizing binding mode 927, energy is 330.007, rmsd is 38.038246
sib.fastconf.EADock3: Minimizing binding mode 928, energy is 330.257, rmsd is 29.412277
sib.fastconf.EADock3: Minimizing binding mode 929, energy is 330.47824, rmsd is 2.4080086
sib.fastconf.EADock3: Minimizing binding mode 930, energy is 330.51456, rmsd is 19.625849
sib.fastconf.EADock3: Minimizing binding mode 931, energy is 330.77075, rmsd is 19.511757
sib.fastconf.EADock3: Minimizing binding mode 932, energy is 330.84982, rmsd is 55.628643
sib.fastconf.EADock3: Minimizing binding mode 933, energy is 330.9127, rmsd is 2.763322
sib.fastconf.EADock3: Minimizing binding mode 934, energy is 331.21988, rmsd is 21.202251
sib.fastconf.EADock3: Minimizing binding mode 935, energy is 331.30655, rmsd is 24.832659
sib.fastconf.EADock3: Minimizing binding mode 936, energy is 331.8472, rmsd is 28.000374
sib.fastconf.EADock3: Minimizing binding mode 937, energy is 332.02258, rmsd is 36.356003
sib.fastconf.EADock3: Minimizing binding mode 938, energy is 332.04572, rmsd is 19.44417
sib.fastconf.EADock3: Minimizing binding mode 939, energy is 332.2552, rmsd is 55.71066
sib.fastconf.EADock3: Minimizing binding mode 940, energy is 332.40857, rmsd is 20.000446
sib.fastconf.EADock3: Minimizing binding mode 941, energy is 332.9301, rmsd is 51.876213
sib.fastconf.EADock3: Minimizing binding mode 942, energy is 333.02872, rmsd is 2.315244
sib.fastconf.EADock3: Minimizing binding mode 943, energy is 333.35275, rmsd is 2.9362695
sib.fastconf.EADock3: Minimizing binding mode 944, energy is 334.09274, rmsd is 29.29039
sib.fastconf.EADock3: Minimizing binding mode 945, energy is 334.5293, rmsd is 50.433987
sib.fastconf.EADock3: Minimizing binding mode 946, energy is 335.44778, rmsd is 1.7463402
sib.fastconf.EADock3: Minimizing binding mode 947, energy is 335.47037, rmsd is 51.39699
sib.fastconf.EADock3: Minimizing binding mode 948, energy is 336.03195, rmsd is 53.36225
sib.fastconf.EADock3: Minimizing binding mode 949, energy is 336.12115, rmsd is 37.432304
sib.fastconf.EADock3: Minimizing binding mode 950, energy is 336.1806, rmsd is 21.162125
sib.fastconf.EADock3: Minimizing binding mode 951, energy is 336.67715, rmsd is 1.0767744
sib.fastconf.EADock3: Minimizing binding mode 952, energy is 336.73627, rmsd is 44.028732
sib.fastconf.EADock3: Minimizing binding mode 953, energy is 337.2072, rmsd is 20.985188
sib.fastconf.EADock3: Minimizing binding mode 954, energy is 337.36026, rmsd is 3.6788876
sib.fastconf.EADock3: Minimizing binding mode 955, energy is 337.40247, rmsd is 37.748833
sib.fastconf.EADock3: Minimizing binding mode 956, energy is 337.47165, rmsd is 48.669353
sib.fastconf.EADock3: Minimizing binding mode 957, energy is 337.5074, rmsd is 23.276665
sib.fastconf.EADock3: Minimizing binding mode 958, energy is 337.54974, rmsd is 36.097515
sib.fastconf.EADock3: Minimizing binding mode 959, energy is 337.81097, rmsd is 18.973356
sib.fastconf.EADock3: Minimizing binding mode 960, energy is 337.98798, rmsd is 18.052755
sib.fastconf.EADock3: Minimizing binding mode 961, energy is 338.01865, rmsd is 50.557335
sib.fastconf.EADock3: Minimizing binding mode 962, energy is 338.11896, rmsd is 23.123974
sib.fastconf.EADock3: Minimizing binding mode 963, energy is 338.2621, rmsd is 35.75568
sib.fastconf.EADock3: Minimizing binding mode 964, energy is 338.5729, rmsd is 52.963684
sib.fastconf.EADock3: Minimizing binding mode 965, energy is 338.7888, rmsd is 2.7832234
sib.fastconf.EADock3: Minimizing binding mode 966, energy is 339.1607, rmsd is 21.284052
sib.fastconf.EADock3: Minimizing binding mode 967, energy is 339.1704, rmsd is 45.82496
sib.fastconf.EADock3: Minimizing binding mode 968, energy is 339.2676, rmsd is 3.3106477
sib.fastconf.EADock3: Minimizing binding mode 969, energy is 339.33102, rmsd is 23.246876
sib.fastconf.EADock3: Minimizing binding mode 970, energy is 340.35135, rmsd is 55.176258
sib.fastconf.EADock3: Minimizing binding mode 971, energy is 340.42297, rmsd is 28.325119
sib.fastconf.EADock3: Minimizing binding mode 972, energy is 340.4364, rmsd is 3.1638298
sib.fastconf.EADock3: Minimizing binding mode 973, energy is 340.62244, rmsd is 51.882378
sib.fastconf.EADock3: Minimizing binding mode 974, energy is 340.7021, rmsd is 3.6634653
sib.fastconf.EADock3: Minimizing binding mode 975, energy is 341.45764, rmsd is 22.220343
sib.fastconf.EADock3: Minimizing binding mode 976, energy is 341.75037, rmsd is 25.417257
sib.fastconf.EADock3: Minimizing binding mode 977, energy is 341.88608, rmsd is 47.429054
sib.fastconf.EADock3: Minimizing binding mode 978, energy is 342.12918, rmsd is 24.050623
sib.fastconf.EADock3: Minimizing binding mode 979, energy is 342.13425, rmsd is 28.867924
sib.fastconf.EADock3: Minimizing binding mode 980, energy is 342.1562, rmsd is 2.0786405
sib.fastconf.EADock3: Minimizing binding mode 981, energy is 342.28177, rmsd is 3.108041
sib.fastconf.EADock3: Minimizing binding mode 982, energy is 343.38968, rmsd is 28.938087
sib.fastconf.EADock3: Minimizing binding mode 983, energy is 343.57156, rmsd is 2.5665057
sib.fastconf.EADock3: Minimizing binding mode 984, energy is 343.7153, rmsd is 21.562119
sib.fastconf.EADock3: Minimizing binding mode 985, energy is 343.85324, rmsd is 1.5763524
sib.fastconf.EADock3: Minimizing binding mode 986, energy is 344.00723, rmsd is 2.4172387
sib.fastconf.EADock3: Minimizing binding mode 987, energy is 344.1298, rmsd is 20.439713
sib.fastconf.EADock3: Minimizing binding mode 988, energy is 344.19748, rmsd is 51.057545
sib.fastconf.EADock3: Minimizing binding mode 989, energy is 344.5329, rmsd is 21.924025
sib.fastconf.EADock3: Minimizing binding mode 990, energy is 344.72266, rmsd is 2.7240584
sib.fastconf.EADock3: Minimizing binding mode 991, energy is 344.77692, rmsd is 36.972633
sib.fastconf.EADock3: Minimizing binding mode 992, energy is 344.78168, rmsd is 23.33705
sib.fastconf.EADock3: Minimizing binding mode 993, energy is 344.79105, rmsd is 45.278194
sib.fastconf.EADock3: Minimizing binding mode 994, energy is 344.90234, rmsd is 35.39977
sib.fastconf.EADock3: Minimizing binding mode 995, energy is 345.11548, rmsd is 2.3491774
sib.fastconf.EADock3: Minimizing binding mode 996, energy is 345.4178, rmsd is 25.80068
sib.fastconf.EADock3: Minimizing binding mode 997, energy is 345.4294, rmsd is 22.67565
sib.fastconf.EADock3: Minimizing binding mode 998, energy is 345.68417, rmsd is 53.761555
sib.fastconf.EADock3: Minimizing binding mode 999, energy is 345.79956, rmsd is 21.598206
sib.fastconf.EADock3: Minimizing binding mode 1000, energy is 345.86853, rmsd is 22.642622
sib.fastconf.EADock3: Minimizing binding mode 1001, energy is 345.88763, rmsd is 18.623934
sib.fastconf.EADock3: Minimizing binding mode 1002, energy is 346.03308, rmsd is 39.559265
sib.fastconf.EADock3: Minimizing binding mode 1003, energy is 346.1281, rmsd is 23.29297
sib.fastconf.EADock3: Minimizing binding mode 1004, energy is 346.16882, rmsd is 35.811172
sib.fastconf.EADock3: Minimizing binding mode 1005, energy is 346.54297, rmsd is 1.3138309
sib.fastconf.EADock3: Minimizing binding mode 1006, energy is 346.74567, rmsd is 2.9523165
sib.fastconf.EADock3: Minimizing binding mode 1007, energy is 346.8564, rmsd is 29.582
sib.fastconf.EADock3: Minimizing binding mode 1008, energy is 347.08307, rmsd is 34.592102
sib.fastconf.EADock3: Minimizing binding mode 1009, energy is 347.7133, rmsd is 62.24541
sib.fastconf.EADock3: Minimizing binding mode 1010, energy is 348.08936, rmsd is 25.408117
sib.fastconf.EADock3: Minimizing binding mode 1011, energy is 348.26407, rmsd is 52.988743
sib.fastconf.EADock3: Minimizing binding mode 1012, energy is 348.48837, rmsd is 37.983536
sib.fastconf.EADock3: Minimizing binding mode 1013, energy is 348.55627, rmsd is 1.9433266
sib.fastconf.EADock3: Minimizing binding mode 1014, energy is 348.75336, rmsd is 29.647678
sib.fastconf.EADock3: Minimizing binding mode 1015, energy is 348.8634, rmsd is 2.8538947
sib.fastconf.EADock3: Minimizing binding mode 1016, energy is 349.0189, rmsd is 38.267776
sib.fastconf.EADock3: Minimizing binding mode 1017, energy is 349.14905, rmsd is 22.128899
sib.fastconf.EADock3: Minimizing binding mode 1018, energy is 349.15555, rmsd is 26.032372
sib.fastconf.EADock3: Minimizing binding mode 1019, energy is 350.30344, rmsd is 35.082848
sib.fastconf.EADock3: Minimizing binding mode 1020, energy is 350.6508, rmsd is 20.155598
sib.fastconf.EADock3: Minimizing binding mode 1021, energy is 350.68018, rmsd is 20.685543
sib.fastconf.EADock3: Minimizing binding mode 1022, energy is 350.77716, rmsd is 21.551102
sib.fastconf.EADock3: Minimizing binding mode 1023, energy is 351.1544, rmsd is 48.527504
sib.fastconf.EADock3: Minimizing binding mode 1024, energy is 351.4735, rmsd is 32.554577
sib.fastconf.EADock3: Minimizing binding mode 1025, energy is 351.69147, rmsd is 36.250893
sib.fastconf.EADock3: Minimizing binding mode 1026, energy is 352.1682, rmsd is 53.140198
sib.fastconf.EADock3: Minimizing binding mode 1027, energy is 352.44104, rmsd is 36.323467
sib.fastconf.EADock3: Minimizing binding mode 1028, energy is 352.6626, rmsd is 25.92515
sib.fastconf.EADock3: Minimizing binding mode 1029, energy is 352.95663, rmsd is 1.7120124
sib.fastconf.EADock3: Minimizing binding mode 1030, energy is 353.16547, rmsd is 42.066402
sib.fastconf.EADock3: Minimizing binding mode 1031, energy is 353.17456, rmsd is 35.2732
sib.fastconf.EADock3: Minimizing binding mode 1032, energy is 353.73996, rmsd is 50.19441
sib.fastconf.EADock3: Minimizing binding mode 1033, energy is 353.7931, rmsd is 53.074654
sib.fastconf.EADock3: Minimizing binding mode 1034, energy is 353.9086, rmsd is 2.7355678
sib.fastconf.EADock3: Minimizing binding mode 1035, energy is 353.928, rmsd is 1.73494
sib.fastconf.EADock3: Minimizing binding mode 1036, energy is 353.99966, rmsd is 36.216114
sib.fastconf.EADock3: Minimizing binding mode 1037, energy is 354.00153, rmsd is 28.855078
sib.fastconf.EADock3: Minimizing binding mode 1038, energy is 354.2359, rmsd is 38.520195
sib.fastconf.EADock3: Minimizing binding mode 1039, energy is 354.3064, rmsd is 53.751625
sib.fastconf.EADock3: Minimizing binding mode 1040, energy is 354.38373, rmsd is 25.450891
sib.fastconf.EADock3: Minimizing binding mode 1041, energy is 354.45218, rmsd is 50.333725
sib.fastconf.EADock3: Minimizing binding mode 1042, energy is 354.61633, rmsd is 21.86837
sib.fastconf.EADock3: Minimizing binding mode 1043, energy is 354.67523, rmsd is 54.059277
sib.fastconf.EADock3: Minimizing binding mode 1044, energy is 355.39767, rmsd is 2.6908338
sib.fastconf.EADock3: Minimizing binding mode 1045, energy is 355.63068, rmsd is 3.0707603
sib.fastconf.EADock3: Minimizing binding mode 1046, energy is 355.72186, rmsd is 50.089684
sib.fastconf.EADock3: Minimizing binding mode 1047, energy is 355.74768, rmsd is 40.631844
sib.fastconf.EADock3: Minimizing binding mode 1048, energy is 355.8379, rmsd is 23.373158
sib.fastconf.EADock3: Minimizing binding mode 1049, energy is 355.91217, rmsd is 29.49692
sib.fastconf.EADock3: Minimizing binding mode 1050, energy is 356.23767, rmsd is 34.472855
sib.fastconf.EADock3: Minimizing binding mode 1051, energy is 356.2436, rmsd is 49.434093
sib.fastconf.EADock3: Minimizing binding mode 1052, energy is 356.27463, rmsd is 3.1150897
sib.fastconf.EADock3: Minimizing binding mode 1053, energy is 356.28098, rmsd is 29.284193
sib.fastconf.EADock3: Minimizing binding mode 1054, energy is 356.894, rmsd is 49.970963
sib.fastconf.EADock3: Minimizing binding mode 1055, energy is 357.2753, rmsd is 23.715443
sib.fastconf.EADock3: Minimizing binding mode 1056, energy is 357.50677, rmsd is 24.44718
sib.fastconf.EADock3: Minimizing binding mode 1057, energy is 357.8132, rmsd is 47.002308
sib.fastconf.EADock3: Minimizing binding mode 1058, energy is 358.1167, rmsd is 51.410213
sib.fastconf.EADock3: Minimizing binding mode 1059, energy is 358.15, rmsd is 2.712534
sib.fastconf.EADock3: Minimizing binding mode 1060, energy is 358.4972, rmsd is 50.745106
sib.fastconf.EADock3: Minimizing binding mode 1061, energy is 358.76382, rmsd is 37.019344
sib.fastconf.EADock3: Minimizing binding mode 1062, energy is 358.88446, rmsd is 37.343212
sib.fastconf.EADock3: Minimizing binding mode 1063, energy is 359.0976, rmsd is 23.297373
sib.fastconf.EADock3: Minimizing binding mode 1064, energy is 359.26645, rmsd is 1.8306909
sib.fastconf.EADock3: Minimizing binding mode 1065, energy is 359.4784, rmsd is 53.585518
sib.fastconf.EADock3: Minimizing binding mode 1066, energy is 359.49, rmsd is 36.6483
sib.fastconf.EADock3: Minimizing binding mode 1067, energy is 359.65332, rmsd is 46.088432
sib.fastconf.EADock3: Minimizing binding mode 1068, energy is 360.64352, rmsd is 3.0724087
sib.fastconf.EADock3: Minimizing binding mode 1069, energy is 360.9079, rmsd is 38.888855
sib.fastconf.EADock3: Minimizing binding mode 1070, energy is 361.1667, rmsd is 51.72698
sib.fastconf.EADock3: Minimizing binding mode 1071, energy is 361.1947, rmsd is 37.833046
sib.fastconf.EADock3: Minimizing binding mode 1072, energy is 361.19907, rmsd is 32.875828
sib.fastconf.EADock3: Minimizing binding mode 1073, energy is 361.30182, rmsd is 50.808037
sib.fastconf.EADock3: Minimizing binding mode 1074, energy is 361.62323, rmsd is 45.936028
sib.fastconf.EADock3: Minimizing binding mode 1075, energy is 362.19244, rmsd is 3.6095526
sib.fastconf.EADock3: Minimizing binding mode 1076, energy is 362.37894, rmsd is 27.821707
sib.fastconf.EADock3: Minimizing binding mode 1077, energy is 362.4417, rmsd is 24.225626
sib.fastconf.EADock3: Minimizing binding mode 1078, energy is 362.73788, rmsd is 22.748623
sib.fastconf.EADock3: Minimizing binding mode 1079, energy is 362.9029, rmsd is 51.69528
sib.fastconf.EADock3: Minimizing binding mode 1080, energy is 363.02066, rmsd is 40.034935
sib.fastconf.EADock3: Minimizing binding mode 1081, energy is 363.12466, rmsd is 1.9525878
sib.fastconf.EADock3: Minimizing binding mode 1082, energy is 363.28705, rmsd is 53.90767
sib.fastconf.EADock3: Minimizing binding mode 1083, energy is 363.3875, rmsd is 36.65762
sib.fastconf.EADock3: Minimizing binding mode 1084, energy is 363.97726, rmsd is 26.403257
sib.fastconf.EADock3: Minimizing binding mode 1085, energy is 364.2735, rmsd is 21.004858
sib.fastconf.EADock3: Minimizing binding mode 1086, energy is 364.30063, rmsd is 21.853779
sib.fastconf.EADock3: Minimizing binding mode 1087, energy is 364.32217, rmsd is 22.717318
sib.fastconf.EADock3: Minimizing binding mode 1088, energy is 364.37756, rmsd is 23.250269
sib.fastconf.EADock3: Minimizing binding mode 1089, energy is 364.84985, rmsd is 18.314333
sib.fastconf.EADock3: Minimizing binding mode 1090, energy is 365.09082, rmsd is 51.72479
sib.fastconf.EADock3: Minimizing binding mode 1091, energy is 365.22574, rmsd is 23.595806
sib.fastconf.EADock3: Minimizing binding mode 1092, energy is 365.2611, rmsd is 36.413506
sib.fastconf.EADock3: Minimizing binding mode 1093, energy is 366.01202, rmsd is 51.97366
sib.fastconf.EADock3: Minimizing binding mode 1094, energy is 367.11475, rmsd is 20.786428
sib.fastconf.EADock3: Minimizing binding mode 1095, energy is 367.65146, rmsd is 1.9374335
sib.fastconf.EADock3: Minimizing binding mode 1096, energy is 367.76187, rmsd is 3.0498044
sib.fastconf.EADock3: Minimizing binding mode 1097, energy is 367.76532, rmsd is 26.712864
sib.fastconf.EADock3: Minimizing binding mode 1098, energy is 368.39252, rmsd is 1.985235
sib.fastconf.EADock3: Minimizing binding mode 1099, energy is 368.81195, rmsd is 48.55614
sib.fastconf.EADock3: Minimizing binding mode 1100, energy is 368.84344, rmsd is 33.915318
sib.fastconf.EADock3: Minimizing binding mode 1101, energy is 369.0132, rmsd is 36.656925
sib.fastconf.EADock3: Minimizing binding mode 1102, energy is 369.42648, rmsd is 29.403542
sib.fastconf.EADock3: Minimizing binding mode 1103, energy is 369.44824, rmsd is 22.206347
sib.fastconf.EADock3: Minimizing binding mode 1104, energy is 369.96716, rmsd is 25.35267
sib.fastconf.EADock3: Minimizing binding mode 1105, energy is 370.27847, rmsd is 21.70433
sib.fastconf.EADock3: Minimizing binding mode 1106, energy is 370.5352, rmsd is 23.041975
sib.fastconf.EADock3: Minimizing binding mode 1107, energy is 370.73196, rmsd is 37.21207
sib.fastconf.EADock3: Minimizing binding mode 1108, energy is 370.94345, rmsd is 22.833239
sib.fastconf.EADock3: Minimizing binding mode 1109, energy is 371.19543, rmsd is 48.24256
sib.fastconf.EADock3: Minimizing binding mode 1110, energy is 371.42386, rmsd is 2.6949277
sib.fastconf.EADock3: Minimizing binding mode 1111, energy is 371.83054, rmsd is 35.956017
sib.fastconf.EADock3: Minimizing binding mode 1112, energy is 371.8423, rmsd is 1.2045314
sib.fastconf.EADock3: Minimizing binding mode 1113, energy is 372.14905, rmsd is 51.039856
sib.fastconf.EADock3: Minimizing binding mode 1114, energy is 372.4161, rmsd is 36.175735
sib.fastconf.EADock3: Minimizing binding mode 1115, energy is 372.70602, rmsd is 22.035267
sib.fastconf.EADock3: Minimizing binding mode 1116, energy is 372.82162, rmsd is 1.5224928
sib.fastconf.EADock3: Minimizing binding mode 1117, energy is 372.9091, rmsd is 46.158573
sib.fastconf.EADock3: Minimizing binding mode 1118, energy is 373.00787, rmsd is 43.40379
sib.fastconf.EADock3: Minimizing binding mode 1119, energy is 373.36813, rmsd is 37.446465
sib.fastconf.EADock3: Minimizing binding mode 1120, energy is 373.69153, rmsd is 1.8301761
sib.fastconf.EADock3: Minimizing binding mode 1121, energy is 373.72614, rmsd is 41.94989
sib.fastconf.EADock3: Minimizing binding mode 1122, energy is 374.5805, rmsd is 21.92123
sib.fastconf.EADock3: Minimizing binding mode 1123, energy is 375.40112, rmsd is 22.983183
sib.fastconf.EADock3: Minimizing binding mode 1124, energy is 375.47623, rmsd is 43.610996
sib.fastconf.EADock3: Minimizing binding mode 1125, energy is 375.82486, rmsd is 21.77247
sib.fastconf.EADock3: Minimizing binding mode 1126, energy is 375.86487, rmsd is 53.600468
sib.fastconf.EADock3: Minimizing binding mode 1127, energy is 375.96603, rmsd is 21.463087
sib.fastconf.EADock3: Minimizing binding mode 1128, energy is 376.34515, rmsd is 35.985813
sib.fastconf.EADock3: Minimizing binding mode 1129, energy is 376.59128, rmsd is 2.922689
sib.fastconf.EADock3: Minimizing binding mode 1130, energy is 376.7803, rmsd is 46.312622
sib.fastconf.EADock3: Minimizing binding mode 1131, energy is 376.80325, rmsd is 47.50559
sib.fastconf.EADock3: Minimizing binding mode 1132, energy is 376.9885, rmsd is 25.96004
sib.fastconf.EADock3: Minimizing binding mode 1133, energy is 377.0368, rmsd is 45.650436
sib.fastconf.EADock3: Minimizing binding mode 1134, energy is 377.89636, rmsd is 34.23088
sib.fastconf.EADock3: Minimizing binding mode 1135, energy is 378.2777, rmsd is 39.475613
sib.fastconf.EADock3: Minimizing binding mode 1136, energy is 378.42844, rmsd is 45.88769
sib.fastconf.EADock3: Minimizing binding mode 1137, energy is 378.49847, rmsd is 28.262842
sib.fastconf.EADock3: Minimizing binding mode 1138, energy is 378.90222, rmsd is 28.520891
sib.fastconf.EADock3: Minimizing binding mode 1139, energy is 378.9847, rmsd is 22.32209
sib.fastconf.EADock3: Minimizing binding mode 1140, energy is 379.03665, rmsd is 49.132736
sib.fastconf.EADock3: Minimizing binding mode 1141, energy is 379.26395, rmsd is 3.4591389
sib.fastconf.EADock3: Minimizing binding mode 1142, energy is 379.36176, rmsd is 25.205196
sib.fastconf.EADock3: Minimizing binding mode 1143, energy is 379.54144, rmsd is 33.841576
sib.fastconf.EADock3: Minimizing binding mode 1144, energy is 379.77097, rmsd is 18.851706
sib.fastconf.EADock3: Minimizing binding mode 1145, energy is 379.92065, rmsd is 2.8348393
sib.fastconf.EADock3: Minimizing binding mode 1146, energy is 380.29834, rmsd is 22.004723
sib.fastconf.EADock3: Minimizing binding mode 1147, energy is 380.49097, rmsd is 45.329494
sib.fastconf.EADock3: Minimizing binding mode 1148, energy is 380.54108, rmsd is 51.195232
sib.fastconf.EADock3: Minimizing binding mode 1149, energy is 380.75604, rmsd is 35.844994
sib.fastconf.EADock3: Minimizing binding mode 1150, energy is 381.2744, rmsd is 22.552305
sib.fastconf.EADock3: Minimizing binding mode 1151, energy is 381.52682, rmsd is 45.364864
sib.fastconf.EADock3: Minimizing binding mode 1152, energy is 381.56546, rmsd is 24.532265
sib.fastconf.EADock3: Minimizing binding mode 1153, energy is 381.605, rmsd is 34.722744
sib.fastconf.EADock3: Minimizing binding mode 1154, energy is 381.6493, rmsd is 3.3682945
sib.fastconf.EADock3: Minimizing binding mode 1155, energy is 381.8366, rmsd is 36.26107
sib.fastconf.EADock3: Minimizing binding mode 1156, energy is 381.93738, rmsd is 49.882393
sib.fastconf.EADock3: Minimizing binding mode 1157, energy is 382.03143, rmsd is 33.777203
sib.fastconf.EADock3: Minimizing binding mode 1158, energy is 382.18924, rmsd is 40.49998
sib.fastconf.EADock3: Minimizing binding mode 1159, energy is 382.25522, rmsd is 34.623276
sib.fastconf.EADock3: Minimizing binding mode 1160, energy is 382.62622, rmsd is 21.721102
sib.fastconf.EADock3: Minimizing binding mode 1161, energy is 383.2931, rmsd is 48.18366
sib.fastconf.EADock3: Minimizing binding mode 1162, energy is 383.66406, rmsd is 44.987923
sib.fastconf.EADock3: Minimizing binding mode 1163, energy is 383.74902, rmsd is 28.841078
sib.fastconf.EADock3: Minimizing binding mode 1164, energy is 384.1445, rmsd is 21.141277
sib.fastconf.EADock3: Minimizing binding mode 1165, energy is 384.55392, rmsd is 29.068153
sib.fastconf.EADock3: Minimizing binding mode 1166, energy is 385.2456, rmsd is 34.200512
sib.fastconf.EADock3: Minimizing binding mode 1167, energy is 385.44254, rmsd is 25.66598
sib.fastconf.EADock3: Minimizing binding mode 1168, energy is 385.53113, rmsd is 25.92313
sib.fastconf.EADock3: Minimizing binding mode 1169, energy is 385.75058, rmsd is 22.16747
sib.fastconf.EADock3: Minimizing binding mode 1170, energy is 385.9231, rmsd is 26.9149
sib.fastconf.EADock3: Minimizing binding mode 1171, energy is 386.472, rmsd is 17.109993
sib.fastconf.EADock3: Minimizing binding mode 1172, energy is 386.53842, rmsd is 37.29075
sib.fastconf.EADock3: Minimizing binding mode 1173, energy is 386.83737, rmsd is 33.414974
sib.fastconf.EADock3: Minimizing binding mode 1174, energy is 387.14886, rmsd is 28.315435
sib.fastconf.EADock3: Minimizing binding mode 1175, energy is 387.25827, rmsd is 32.328194
sib.fastconf.EADock3: Minimizing binding mode 1176, energy is 387.54196, rmsd is 50.66194
sib.fastconf.EADock3: Minimizing binding mode 1177, energy is 387.88974, rmsd is 36.560112
sib.fastconf.EADock3: Minimizing binding mode 1178, energy is 388.21375, rmsd is 33.844475
sib.fastconf.EADock3: Minimizing binding mode 1179, energy is 388.68164, rmsd is 37.756386
sib.fastconf.EADock3: Minimizing binding mode 1180, energy is 388.83313, rmsd is 53.342503
sib.fastconf.EADock3: Minimizing binding mode 1181, energy is 388.8971, rmsd is 36.386856
sib.fastconf.EADock3: Minimizing binding mode 1182, energy is 388.95032, rmsd is 30.685534
sib.fastconf.EADock3: Minimizing binding mode 1183, energy is 389.58725, rmsd is 52.645718
sib.fastconf.EADock3: Minimizing binding mode 1184, energy is 389.93658, rmsd is 36.233593
sib.fastconf.EADock3: Minimizing binding mode 1185, energy is 390.1188, rmsd is 43.59816
sib.fastconf.EADock3: Minimizing binding mode 1186, energy is 390.28186, rmsd is 37.573185
sib.fastconf.EADock3: Minimizing binding mode 1187, energy is 390.7467, rmsd is 20.465221
sib.fastconf.EADock3: Minimizing binding mode 1188, energy is 390.9954, rmsd is 2.3970551
sib.fastconf.EADock3: Minimizing binding mode 1189, energy is 391.15317, rmsd is 42.856968
sib.fastconf.EADock3: Minimizing binding mode 1190, energy is 391.46313, rmsd is 28.986776
sib.fastconf.EADock3: Minimizing binding mode 1191, energy is 392.51273, rmsd is 60.209866
sib.fastconf.EADock3: Minimizing binding mode 1192, energy is 392.8351, rmsd is 41.204
sib.fastconf.EADock3: Minimizing binding mode 1193, energy is 392.84225, rmsd is 37.39543
sib.fastconf.EADock3: Minimizing binding mode 1194, energy is 393.2067, rmsd is 34.09856
sib.fastconf.EADock3: Minimizing binding mode 1195, energy is 393.28406, rmsd is 22.496271
sib.fastconf.EADock3: Minimizing binding mode 1196, energy is 393.28464, rmsd is 52.093178
sib.fastconf.EADock3: Minimizing binding mode 1197, energy is 393.28516, rmsd is 41.105732
sib.fastconf.EADock3: Minimizing binding mode 1198, energy is 393.41437, rmsd is 37.25671
sib.fastconf.EADock3: Minimizing binding mode 1199, energy is 393.5236, rmsd is 2.0515072
sib.fastconf.EADock3: Minimizing binding mode 1200, energy is 394.19342, rmsd is 47.066784
sib.fastconf.EADock3: Minimizing binding mode 1201, energy is 394.20422, rmsd is 55.688164
sib.fastconf.EADock3: Minimizing binding mode 1202, energy is 394.31778, rmsd is 2.5701754
sib.fastconf.EADock3: Minimizing binding mode 1203, energy is 394.36252, rmsd is 46.267067
sib.fastconf.EADock3: Minimizing binding mode 1204, energy is 394.49127, rmsd is 2.091074
sib.fastconf.EADock3: Minimizing binding mode 1205, energy is 395.11618, rmsd is 33.274513
sib.fastconf.EADock3: Minimizing binding mode 1206, energy is 395.12186, rmsd is 22.27555
sib.fastconf.EADock3: Minimizing binding mode 1207, energy is 395.35022, rmsd is 27.52296
sib.fastconf.EADock3: Minimizing binding mode 1208, energy is 395.39676, rmsd is 39.805878
sib.fastconf.EADock3: Minimizing binding mode 1209, energy is 395.41562, rmsd is 49.200893
sib.fastconf.EADock3: Minimizing binding mode 1210, energy is 395.61884, rmsd is 48.87483
sib.fastconf.EADock3: Minimizing binding mode 1211, energy is 395.7886, rmsd is 2.2517967
sib.fastconf.EADock3: Minimizing binding mode 1212, energy is 395.84396, rmsd is 54.019146
sib.fastconf.EADock3: Minimizing binding mode 1213, energy is 396.5885, rmsd is 21.972454
sib.fastconf.EADock3: Minimizing binding mode 1214, energy is 396.5927, rmsd is 34.728477
sib.fastconf.EADock3: Minimizing binding mode 1215, energy is 397.5948, rmsd is 3.3324435
sib.fastconf.EADock3: Minimizing binding mode 1216, energy is 397.68097, rmsd is 23.135668
sib.fastconf.EADock3: Minimizing binding mode 1217, energy is 397.76593, rmsd is 19.792034
sib.fastconf.EADock3: Minimizing binding mode 1218, energy is 397.82602, rmsd is 28.671768
sib.fastconf.EADock3: Minimizing binding mode 1219, energy is 398.20242, rmsd is 45.821655
sib.fastconf.EADock3: Minimizing binding mode 1220, energy is 398.31628, rmsd is 21.856794
sib.fastconf.EADock3: Minimizing binding mode 1221, energy is 398.5959, rmsd is 23.555702
sib.fastconf.EADock3: Minimizing binding mode 1222, energy is 398.68805, rmsd is 41.487274
sib.fastconf.EADock3: Minimizing binding mode 1223, energy is 398.7364, rmsd is 28.079235
sib.fastconf.EADock3: Minimizing binding mode 1224, energy is 398.9007, rmsd is 34.60292
sib.fastconf.EADock3: Minimizing binding mode 1225, energy is 399.6896, rmsd is 1.6034334
sib.fastconf.EADock3: Minimizing binding mode 1226, energy is 399.86188, rmsd is 35.90274
sib.fastconf.EADock3: Minimizing binding mode 1227, energy is 400.1727, rmsd is 21.89559
sib.fastconf.EADock3: Minimizing binding mode 1228, energy is 400.2863, rmsd is 52.903095
sib.fastconf.EADock3: Minimizing binding mode 1229, energy is 400.41296, rmsd is 42.98681
sib.fastconf.EADock3: Minimizing binding mode 1230, energy is 400.45816, rmsd is 22.7794
sib.fastconf.EADock3: Minimizing binding mode 1231, energy is 402.01324, rmsd is 21.449116
sib.fastconf.EADock3: Minimizing binding mode 1232, energy is 402.52686, rmsd is 52.740154
sib.fastconf.EADock3: Minimizing binding mode 1233, energy is 402.96704, rmsd is 2.398529
sib.fastconf.EADock3: Minimizing binding mode 1234, energy is 403.35556, rmsd is 22.78685
sib.fastconf.EADock3: Minimizing binding mode 1235, energy is 403.96414, rmsd is 19.455837
sib.fastconf.EADock3: Minimizing binding mode 1236, energy is 404.79626, rmsd is 21.799793
sib.fastconf.EADock3: Minimizing binding mode 1237, energy is 405.05554, rmsd is 54.81428
sib.fastconf.EADock3: Minimizing binding mode 1238, energy is 405.53558, rmsd is 19.926079
sib.fastconf.EADock3: Minimizing binding mode 1239, energy is 406.03198, rmsd is 21.99276
sib.fastconf.EADock3: Minimizing binding mode 1240, energy is 406.5451, rmsd is 27.336943
sib.fastconf.EADock3: Minimizing binding mode 1241, energy is 406.6935, rmsd is 36.570602
sib.fastconf.EADock3: Minimizing binding mode 1242, energy is 406.76306, rmsd is 19.880972
sib.fastconf.EADock3: Minimizing binding mode 1243, energy is 407.01794, rmsd is 39.36977
sib.fastconf.EADock3: Minimizing binding mode 1244, energy is 407.24567, rmsd is 3.1788752
sib.fastconf.EADock3: Minimizing binding mode 1245, energy is 407.25406, rmsd is 21.114191
sib.fastconf.EADock3: Minimizing binding mode 1246, energy is 407.28442, rmsd is 39.01572
sib.fastconf.EADock3: Minimizing binding mode 1247, energy is 408.00336, rmsd is 19.743063
sib.fastconf.EADock3: Minimizing binding mode 1248, energy is 408.11353, rmsd is 52.10116
sib.fastconf.EADock3: Minimizing binding mode 1249, energy is 408.1662, rmsd is 51.760265
sib.fastconf.EADock3: Minimizing binding mode 1250, energy is 408.49918, rmsd is 47.1928
sib.fastconf.EADock3: Minimizing binding mode 1251, energy is 408.71582, rmsd is 38.2153
sib.fastconf.EADock3: Minimizing binding mode 1252, energy is 409.17856, rmsd is 21.194054
sib.fastconf.EADock3: Minimizing binding mode 1253, energy is 409.30896, rmsd is 52.59993
sib.fastconf.EADock3: Minimizing binding mode 1254, energy is 409.36737, rmsd is 60.796257
sib.fastconf.EADock3: Minimizing binding mode 1255, energy is 409.6642, rmsd is 33.33654
sib.fastconf.EADock3: Minimizing binding mode 1256, energy is 409.75076, rmsd is 36.208233
sib.fastconf.EADock3: Minimizing binding mode 1257, energy is 409.89096, rmsd is 43.372486
sib.fastconf.EADock3: Minimizing binding mode 1258, energy is 410.06522, rmsd is 54.129913
sib.fastconf.EADock3: Minimizing binding mode 1259, energy is 410.38, rmsd is 50.952793
sib.fastconf.EADock3: Minimizing binding mode 1260, energy is 410.96722, rmsd is 37.006283
sib.fastconf.EADock3: Minimizing binding mode 1261, energy is 411.00192, rmsd is 21.547943
sib.fastconf.EADock3: Minimizing binding mode 1262, energy is 411.18948, rmsd is 24.742615
sib.fastconf.EADock3: Minimizing binding mode 1263, energy is 411.90585, rmsd is 2.0073667
sib.fastconf.EADock3: Minimizing binding mode 1264, energy is 412.2322, rmsd is 47.90089
sib.fastconf.EADock3: Minimizing binding mode 1265, energy is 412.39966, rmsd is 19.670198
sib.fastconf.EADock3: Minimizing binding mode 1266, energy is 412.6693, rmsd is 23.938904
sib.fastconf.EADock3: Minimizing binding mode 1267, energy is 412.97513, rmsd is 22.63835
sib.fastconf.EADock3: Minimizing binding mode 1268, energy is 413.09348, rmsd is 1.1999545
sib.fastconf.EADock3: Minimizing binding mode 1269, energy is 413.92584, rmsd is 28.552488
sib.fastconf.EADock3: Minimizing binding mode 1270, energy is 414.0567, rmsd is 2.10455
sib.fastconf.EADock3: Minimizing binding mode 1271, energy is 414.52917, rmsd is 35.50813
sib.fastconf.EADock3: Minimizing binding mode 1272, energy is 414.60748, rmsd is 22.567879
sib.fastconf.EADock3: Minimizing binding mode 1273, energy is 415.23984, rmsd is 36.008667
sib.fastconf.EADock3: Minimizing binding mode 1274, energy is 415.68433, rmsd is 20.439945
sib.fastconf.EADock3: Minimizing binding mode 1275, energy is 415.76553, rmsd is 3.0839815
sib.fastconf.EADock3: Minimizing binding mode 1276, energy is 415.96695, rmsd is 52.180695
sib.fastconf.EADock3: Minimizing binding mode 1277, energy is 416.02634, rmsd is 23.42764
sib.fastconf.EADock3: Minimizing binding mode 1278, energy is 417.92166, rmsd is 33.660213
sib.fastconf.EADock3: Minimizing binding mode 1279, energy is 418.15488, rmsd is 34.813675
sib.fastconf.EADock3: Minimizing binding mode 1280, energy is 418.17236, rmsd is 36.140965
sib.fastconf.EADock3: Minimizing binding mode 1281, energy is 418.49274, rmsd is 25.336823
sib.fastconf.EADock3: Minimizing binding mode 1282, energy is 418.59506, rmsd is 19.655092
sib.fastconf.EADock3: Minimizing binding mode 1283, energy is 418.9324, rmsd is 20.568405
sib.fastconf.EADock3: Minimizing binding mode 1284, energy is 418.94604, rmsd is 46.45772
sib.fastconf.EADock3: Minimizing binding mode 1285, energy is 419.00327, rmsd is 54.01051
sib.fastconf.EADock3: Minimizing binding mode 1286, energy is 419.47183, rmsd is 46.096687
sib.fastconf.EADock3: Minimizing binding mode 1287, energy is 420.0878, rmsd is 54.137173
sib.fastconf.EADock3: Minimizing binding mode 1288, energy is 420.29413, rmsd is 23.373379
sib.fastconf.EADock3: Minimizing binding mode 1289, energy is 420.3719, rmsd is 53.17456
sib.fastconf.EADock3: Minimizing binding mode 1290, energy is 420.5063, rmsd is 48.59541
sib.fastconf.EADock3: Minimizing binding mode 1291, energy is 420.97787, rmsd is 35.588833
sib.fastconf.EADock3: Minimizing binding mode 1292, energy is 421.5025, rmsd is 29.66191
sib.fastconf.EADock3: Minimizing binding mode 1293, energy is 421.51233, rmsd is 21.667679
sib.fastconf.EADock3: Minimizing binding mode 1294, energy is 421.8493, rmsd is 47.260296
sib.fastconf.EADock3: Minimizing binding mode 1295, energy is 421.87057, rmsd is 47.077126
sib.fastconf.EADock3: Minimizing binding mode 1296, energy is 422.36734, rmsd is 20.58651
sib.fastconf.EADock3: Minimizing binding mode 1297, energy is 422.45197, rmsd is 32.980293
sib.fastconf.EADock3: Minimizing binding mode 1298, energy is 423.36377, rmsd is 43.122093
sib.fastconf.EADock3: Minimizing binding mode 1299, energy is 423.5632, rmsd is 23.363224
sib.fastconf.EADock3: Minimizing binding mode 1300, energy is 423.97546, rmsd is 22.489008
sib.fastconf.EADock3: Minimizing binding mode 1301, energy is 424.11694, rmsd is 2.2964668
sib.fastconf.EADock3: Minimizing binding mode 1302, energy is 424.2035, rmsd is 23.43591
sib.fastconf.EADock3: Minimizing binding mode 1303, energy is 424.2967, rmsd is 35.281235
sib.fastconf.EADock3: Minimizing binding mode 1304, energy is 424.37943, rmsd is 47.883186
sib.fastconf.EADock3: Minimizing binding mode 1305, energy is 424.60556, rmsd is 20.994108
sib.fastconf.EADock3: Minimizing binding mode 1306, energy is 424.97598, rmsd is 62.55733
sib.fastconf.EADock3: Minimizing binding mode 1307, energy is 425.3539, rmsd is 42.347546
sib.fastconf.EADock3: Minimizing binding mode 1308, energy is 425.4537, rmsd is 3.4539604
sib.fastconf.EADock3: Minimizing binding mode 1309, energy is 425.51764, rmsd is 34.25996
sib.fastconf.EADock3: Minimizing binding mode 1310, energy is 425.56757, rmsd is 2.3962207
sib.fastconf.EADock3: Minimizing binding mode 1311, energy is 426.1124, rmsd is 36.08481
sib.fastconf.EADock3: Minimizing binding mode 1312, energy is 426.27585, rmsd is 3.2604272
sib.fastconf.EADock3: Minimizing binding mode 1313, energy is 426.31885, rmsd is 48.26328
sib.fastconf.EADock3: Minimizing binding mode 1314, energy is 426.6275, rmsd is 52.766163
sib.fastconf.EADock3: Minimizing binding mode 1315, energy is 427.16772, rmsd is 36.743446
sib.fastconf.EADock3: Minimizing binding mode 1316, energy is 427.20657, rmsd is 22.021645
sib.fastconf.EADock3: Minimizing binding mode 1317, energy is 428.0002, rmsd is 52.304165
sib.fastconf.EADock3: Minimizing binding mode 1318, energy is 428.08746, rmsd is 53.20366
sib.fastconf.EADock3: Minimizing binding mode 1319, energy is 428.186, rmsd is 21.639252
sib.fastconf.EADock3: Minimizing binding mode 1320, energy is 428.83734, rmsd is 42.38495
sib.fastconf.EADock3: Minimizing binding mode 1321, energy is 429.10007, rmsd is 34.712284
sib.fastconf.EADock3: Minimizing binding mode 1322, energy is 429.16187, rmsd is 20.562193
sib.fastconf.EADock3: Minimizing binding mode 1323, energy is 429.77917, rmsd is 43.883694
sib.fastconf.EADock3: Minimizing binding mode 1324, energy is 430.13788, rmsd is 52.296047
sib.fastconf.EADock3: Minimizing binding mode 1325, energy is 430.6646, rmsd is 23.256363
sib.fastconf.EADock3: Minimizing binding mode 1326, energy is 431.0618, rmsd is 50.75421
sib.fastconf.EADock3: Minimizing binding mode 1327, energy is 431.18854, rmsd is 2.5720541
sib.fastconf.EADock3: Minimizing binding mode 1328, energy is 431.2794, rmsd is 53.504635
sib.fastconf.EADock3: Minimizing binding mode 1329, energy is 431.61093, rmsd is 3.6466844
sib.fastconf.EADock3: Minimizing binding mode 1330, energy is 431.7121, rmsd is 2.992289
sib.fastconf.EADock3: Minimizing binding mode 1331, energy is 431.97202, rmsd is 2.491927
sib.fastconf.EADock3: Minimizing binding mode 1332, energy is 431.99835, rmsd is 49.828194
sib.fastconf.EADock3: Minimizing binding mode 1333, energy is 433.17365, rmsd is 23.834064
sib.fastconf.EADock3: Minimizing binding mode 1334, energy is 433.56717, rmsd is 23.00381
sib.fastconf.EADock3: Minimizing binding mode 1335, energy is 434.01743, rmsd is 44.403812
sib.fastconf.EADock3: Minimizing binding mode 1336, energy is 434.37842, rmsd is 48.08014
sib.fastconf.EADock3: Minimizing binding mode 1337, energy is 434.69705, rmsd is 50.420956
sib.fastconf.EADock3: Minimizing binding mode 1338, energy is 435.80115, rmsd is 53.026535
sib.fastconf.EADock3: Minimizing binding mode 1339, energy is 436.0314, rmsd is 25.037838
sib.fastconf.EADock3: Minimizing binding mode 1340, energy is 436.05408, rmsd is 1.9269918
sib.fastconf.EADock3: Minimizing binding mode 1341, energy is 436.06097, rmsd is 39.101345
sib.fastconf.EADock3: Minimizing binding mode 1342, energy is 436.1742, rmsd is 28.91892
sib.fastconf.EADock3: Minimizing binding mode 1343, energy is 436.35175, rmsd is 22.86425
sib.fastconf.EADock3: Minimizing binding mode 1344, energy is 436.92487, rmsd is 52.311966
sib.fastconf.EADock3: Minimizing binding mode 1345, energy is 438.01447, rmsd is 3.430693
sib.fastconf.EADock3: Minimizing binding mode 1346, energy is 438.44604, rmsd is 30.494452
sib.fastconf.EADock3: Minimizing binding mode 1347, energy is 439.20456, rmsd is 28.056717
sib.fastconf.EADock3: Minimizing binding mode 1348, energy is 439.2083, rmsd is 51.898167
sib.fastconf.EADock3: Minimizing binding mode 1349, energy is 439.32242, rmsd is 29.756376
sib.fastconf.EADock3: Minimizing binding mode 1350, energy is 439.38263, rmsd is 45.641396
sib.fastconf.EADock3: Minimizing binding mode 1351, energy is 439.4532, rmsd is 39.85874
sib.fastconf.EADock3: Minimizing binding mode 1352, energy is 439.62128, rmsd is 50.553707
sib.fastconf.EADock3: Minimizing binding mode 1353, energy is 439.77435, rmsd is 30.151598
sib.fastconf.EADock3: Minimizing binding mode 1354, energy is 439.80026, rmsd is 34.94904
sib.fastconf.EADock3: Minimizing binding mode 1355, energy is 439.86407, rmsd is 40.778088
sib.fastconf.EADock3: Minimizing binding mode 1356, energy is 440.1237, rmsd is 22.36415
sib.fastconf.EADock3: Minimizing binding mode 1357, energy is 440.32935, rmsd is 43.115383
sib.fastconf.EADock3: Minimizing binding mode 1358, energy is 440.39062, rmsd is 3.1562557
sib.fastconf.EADock3: Minimizing binding mode 1359, energy is 440.72885, rmsd is 50.008595
sib.fastconf.EADock3: Minimizing binding mode 1360, energy is 440.75525, rmsd is 20.2463
sib.fastconf.EADock3: Minimizing binding mode 1361, energy is 440.91614, rmsd is 36.64303
sib.fastconf.EADock3: Minimizing binding mode 1362, energy is 440.91956, rmsd is 1.7160873
sib.fastconf.EADock3: Minimizing binding mode 1363, energy is 441.02274, rmsd is 23.838491
sib.fastconf.EADock3: Minimizing binding mode 1364, energy is 441.2425, rmsd is 20.070673
sib.fastconf.EADock3: Minimizing binding mode 1365, energy is 441.39478, rmsd is 28.829472
sib.fastconf.EADock3: Minimizing binding mode 1366, energy is 441.4782, rmsd is 34.48004
sib.fastconf.EADock3: Minimizing binding mode 1367, energy is 441.50427, rmsd is 2.1590219
sib.fastconf.EADock3: Minimizing binding mode 1368, energy is 441.86145, rmsd is 40.89341
sib.fastconf.EADock3: Minimizing binding mode 1369, energy is 442.12604, rmsd is 50.50418
sib.fastconf.EADock3: Minimizing binding mode 1370, energy is 442.35703, rmsd is 29.251202
sib.fastconf.EADock3: Minimizing binding mode 1371, energy is 442.81323, rmsd is 1.1786638
sib.fastconf.EADock3: Minimizing binding mode 1372, energy is 443.1635, rmsd is 25.524525
sib.fastconf.EADock3: Minimizing binding mode 1373, energy is 443.1756, rmsd is 39.15078
sib.fastconf.EADock3: Minimizing binding mode 1374, energy is 443.45068, rmsd is 47.258373
sib.fastconf.EADock3: Minimizing binding mode 1375, energy is 443.86813, rmsd is 53.0809
sib.fastconf.EADock3: Minimizing binding mode 1376, energy is 444.57562, rmsd is 53.814762
sib.fastconf.EADock3: Minimizing binding mode 1377, energy is 444.8496, rmsd is 34.26802
sib.fastconf.EADock3: Minimizing binding mode 1378, energy is 444.8725, rmsd is 23.124485
sib.fastconf.EADock3: Minimizing binding mode 1379, energy is 445.10425, rmsd is 40.539707
sib.fastconf.EADock3: Minimizing binding mode 1380, energy is 445.3028, rmsd is 20.983513
sib.fastconf.EADock3: Minimizing binding mode 1381, energy is 445.39127, rmsd is 36.459827
sib.fastconf.EADock3: Minimizing binding mode 1382, energy is 446.06433, rmsd is 22.17414
sib.fastconf.EADock3: Minimizing binding mode 1383, energy is 446.1773, rmsd is 49.013176
sib.fastconf.EADock3: Minimizing binding mode 1384, energy is 446.46878, rmsd is 52.48154
sib.fastconf.EADock3: Minimizing binding mode 1385, energy is 446.89972, rmsd is 49.75033
sib.fastconf.EADock3: Minimizing binding mode 1386, energy is 448.15298, rmsd is 51.72938
sib.fastconf.EADock3: Minimizing binding mode 1387, energy is 448.25696, rmsd is 23.107056
sib.fastconf.EADock3: Minimizing binding mode 1388, energy is 448.34845, rmsd is 18.8738
sib.fastconf.EADock3: Minimizing binding mode 1389, energy is 448.5496, rmsd is 50.21135
sib.fastconf.EADock3: Minimizing binding mode 1390, energy is 448.6295, rmsd is 24.36588
sib.fastconf.EADock3: Minimizing binding mode 1391, energy is 448.8035, rmsd is 2.6938505
sib.fastconf.EADock3: Minimizing binding mode 1392, energy is 448.8114, rmsd is 53.162132
sib.fastconf.EADock3: Minimizing binding mode 1393, energy is 449.23788, rmsd is 36.70888
sib.fastconf.EADock3: Minimizing binding mode 1394, energy is 449.4009, rmsd is 22.587492
sib.fastconf.EADock3: Minimizing binding mode 1395, energy is 449.5207, rmsd is 21.99997
sib.fastconf.EADock3: Minimizing binding mode 1396, energy is 449.58945, rmsd is 21.25495
sib.fastconf.EADock3: Minimizing binding mode 1397, energy is 449.64124, rmsd is 33.381138
sib.fastconf.EADock3: Minimizing binding mode 1398, energy is 449.87888, rmsd is 29.202114
sib.fastconf.EADock3: Minimizing binding mode 1399, energy is 449.92752, rmsd is 54.362434
sib.fastconf.EADock3: Minimizing binding mode 1400, energy is 450.23184, rmsd is 48.50678
sib.fastconf.EADock3: Minimizing binding mode 1401, energy is 450.268, rmsd is 3.193958
sib.fastconf.EADock3: Minimizing binding mode 1402, energy is 450.30573, rmsd is 38.523964
sib.fastconf.EADock3: Minimizing binding mode 1403, energy is 450.55576, rmsd is 62.616947
sib.fastconf.EADock3: Minimizing binding mode 1404, energy is 451.72363, rmsd is 20.149237
sib.fastconf.EADock3: Minimizing binding mode 1405, energy is 452.16293, rmsd is 53.54967
sib.fastconf.EADock3: Minimizing binding mode 1406, energy is 452.2925, rmsd is 29.585747
sib.fastconf.EADock3: Minimizing binding mode 1407, energy is 452.37256, rmsd is 2.4263268
sib.fastconf.EADock3: Minimizing binding mode 1408, energy is 452.51773, rmsd is 36.882446
sib.fastconf.EADock3: Minimizing binding mode 1409, energy is 452.53177, rmsd is 21.731688
sib.fastconf.EADock3: Minimizing binding mode 1410, energy is 452.7954, rmsd is 30.478416
sib.fastconf.EADock3: Minimizing binding mode 1411, energy is 453.21683, rmsd is 22.087912
sib.fastconf.EADock3: Minimizing binding mode 1412, energy is 453.58972, rmsd is 24.281002
sib.fastconf.EADock3: Minimizing binding mode 1413, energy is 453.71646, rmsd is 40.37773
sib.fastconf.EADock3: Minimizing binding mode 1414, energy is 453.9444, rmsd is 33.623936
sib.fastconf.EADock3: Minimizing binding mode 1415, energy is 454.14948, rmsd is 55.459713
sib.fastconf.EADock3: Minimizing binding mode 1416, energy is 454.2516, rmsd is 22.777634
sib.fastconf.EADock3: Minimizing binding mode 1417, energy is 454.38687, rmsd is 48.83446
sib.fastconf.EADock3: Minimizing binding mode 1418, energy is 454.72565, rmsd is 35.239204
sib.fastconf.EADock3: Minimizing binding mode 1419, energy is 455.18906, rmsd is 21.767595
sib.fastconf.EADock3: Minimizing binding mode 1420, energy is 455.4354, rmsd is 52.40757
sib.fastconf.EADock3: Minimizing binding mode 1421, energy is 455.7769, rmsd is 45.13218
sib.fastconf.EADock3: Minimizing binding mode 1422, energy is 455.8511, rmsd is 1.8074379
sib.fastconf.EADock3: Minimizing binding mode 1423, energy is 455.87042, rmsd is 51.996353
sib.fastconf.EADock3: Minimizing binding mode 1424, energy is 456.0593, rmsd is 38.86028
sib.fastconf.EADock3: Minimizing binding mode 1425, energy is 456.47064, rmsd is 51.150322
sib.fastconf.EADock3: Minimizing binding mode 1426, energy is 456.54858, rmsd is 54.85338
sib.fastconf.EADock3: Minimizing binding mode 1427, energy is 456.616, rmsd is 22.357546
sib.fastconf.EADock3: Minimizing binding mode 1428, energy is 456.86002, rmsd is 36.678177
sib.fastconf.EADock3: Minimizing binding mode 1429, energy is 457.1641, rmsd is 28.63819
sib.fastconf.EADock3: Minimizing binding mode 1430, energy is 457.54413, rmsd is 43.927162
sib.fastconf.EADock3: Minimizing binding mode 1431, energy is 457.917, rmsd is 21.488995
sib.fastconf.EADock3: Minimizing binding mode 1432, energy is 458.58365, rmsd is 35.422768
sib.fastconf.EADock3: Minimizing binding mode 1433, energy is 458.6724, rmsd is 36.766155
sib.fastconf.EADock3: Minimizing binding mode 1434, energy is 458.81512, rmsd is 2.6109073
sib.fastconf.EADock3: Minimizing binding mode 1435, energy is 458.83438, rmsd is 43.066113
sib.fastconf.EADock3: Minimizing binding mode 1436, energy is 458.9351, rmsd is 20.908047
sib.fastconf.EADock3: Minimizing binding mode 1437, energy is 459.19275, rmsd is 45.66397
sib.fastconf.EADock3: Minimizing binding mode 1438, energy is 459.4054, rmsd is 29.939821
sib.fastconf.EADock3: Minimizing binding mode 1439, energy is 459.4382, rmsd is 21.413454
sib.fastconf.EADock3: Minimizing binding mode 1440, energy is 460.1121, rmsd is 23.34675
sib.fastconf.EADock3: Minimizing binding mode 1441, energy is 460.9327, rmsd is 53.050816
sib.fastconf.EADock3: Minimizing binding mode 1442, energy is 461.00845, rmsd is 20.46103
sib.fastconf.EADock3: Minimizing binding mode 1443, energy is 461.11157, rmsd is 36.68774
sib.fastconf.EADock3: Minimizing binding mode 1444, energy is 461.36795, rmsd is 32.616947
sib.fastconf.EADock3: Minimizing binding mode 1445, energy is 461.6617, rmsd is 24.261879
sib.fastconf.EADock3: Minimizing binding mode 1446, energy is 462.0346, rmsd is 23.189611
sib.fastconf.EADock3: Minimizing binding mode 1447, energy is 462.13843, rmsd is 35.864334
sib.fastconf.EADock3: Minimizing binding mode 1448, energy is 462.21667, rmsd is 36.64914
sib.fastconf.EADock3: Minimizing binding mode 1449, energy is 462.23813, rmsd is 19.097439
sib.fastconf.EADock3: Minimizing binding mode 1450, energy is 462.44434, rmsd is 37.19923
sib.fastconf.EADock3: Minimizing binding mode 1451, energy is 462.64963, rmsd is 38.342106
sib.fastconf.EADock3: Minimizing binding mode 1452, energy is 463.0196, rmsd is 51.53727
sib.fastconf.EADock3: Minimizing binding mode 1453, energy is 463.0467, rmsd is 28.654167
sib.fastconf.EADock3: Minimizing binding mode 1454, energy is 463.34662, rmsd is 53.06902
sib.fastconf.EADock3: Minimizing binding mode 1455, energy is 463.40964, rmsd is 21.959106
sib.fastconf.EADock3: Minimizing binding mode 1456, energy is 463.5154, rmsd is 22.116241
sib.fastconf.EADock3: Minimizing binding mode 1457, energy is 464.74445, rmsd is 21.88356
sib.fastconf.EADock3: Minimizing binding mode 1458, energy is 465.30856, rmsd is 36.388878
sib.fastconf.EADock3: Minimizing binding mode 1459, energy is 465.4541, rmsd is 20.294434
sib.fastconf.EADock3: Minimizing binding mode 1460, energy is 465.66702, rmsd is 50.346085
sib.fastconf.EADock3: Minimizing binding mode 1461, energy is 466.158, rmsd is 30.035095
sib.fastconf.EADock3: Minimizing binding mode 1462, energy is 466.4562, rmsd is 49.82854
sib.fastconf.EADock3: Minimizing binding mode 1463, energy is 466.7854, rmsd is 45.340664
sib.fastconf.EADock3: Minimizing binding mode 1464, energy is 467.13388, rmsd is 41.50489
sib.fastconf.EADock3: Minimizing binding mode 1465, energy is 467.5403, rmsd is 20.839678
sib.fastconf.EADock3: Minimizing binding mode 1466, energy is 467.6187, rmsd is 3.2112157
sib.fastconf.EADock3: Minimizing binding mode 1467, energy is 467.68634, rmsd is 2.670171
sib.fastconf.EADock3: Minimizing binding mode 1468, energy is 467.89102, rmsd is 22.240664
sib.fastconf.EADock3: Minimizing binding mode 1469, energy is 468.07495, rmsd is 20.282942
sib.fastconf.EADock3: Minimizing binding mode 1470, energy is 468.2489, rmsd is 21.361353
sib.fastconf.EADock3: Minimizing binding mode 1471, energy is 468.95856, rmsd is 33.687687
sib.fastconf.EADock3: Minimizing binding mode 1472, energy is 469.09082, rmsd is 53.88511
sib.fastconf.EADock3: Minimizing binding mode 1473, energy is 469.6492, rmsd is 36.085255
sib.fastconf.EADock3: Minimizing binding mode 1474, energy is 470.36377, rmsd is 52.248917
sib.fastconf.EADock3: Minimizing binding mode 1475, energy is 470.8136, rmsd is 47.906384
sib.fastconf.EADock3: Minimizing binding mode 1476, energy is 471.1953, rmsd is 46.290737
sib.fastconf.EADock3: Minimizing binding mode 1477, energy is 471.412, rmsd is 20.677223
sib.fastconf.EADock3: Minimizing binding mode 1478, energy is 471.4808, rmsd is 36.615814
sib.fastconf.EADock3: Minimizing binding mode 1479, energy is 471.52496, rmsd is 47.57449
sib.fastconf.EADock3: Minimizing binding mode 1480, energy is 471.53326, rmsd is 45.99169
sib.fastconf.EADock3: Minimizing binding mode 1481, energy is 471.6235, rmsd is 40.294933
sib.fastconf.EADock3: Minimizing binding mode 1482, energy is 471.69675, rmsd is 47.509468
sib.fastconf.EADock3: Minimizing binding mode 1483, energy is 471.86584, rmsd is 28.69991
sib.fastconf.EADock3: Minimizing binding mode 1484, energy is 472.11783, rmsd is 20.578808
sib.fastconf.EADock3: Minimizing binding mode 1485, energy is 472.64127, rmsd is 39.16883
sib.fastconf.EADock3: Minimizing binding mode 1486, energy is 472.91193, rmsd is 22.309341
sib.fastconf.EADock3: Minimizing binding mode 1487, energy is 472.99045, rmsd is 31.939655
sib.fastconf.EADock3: Minimizing binding mode 1488, energy is 473.06357, rmsd is 23.93113
sib.fastconf.EADock3: Minimizing binding mode 1489, energy is 473.08994, rmsd is 22.888857
sib.fastconf.EADock3: Minimizing binding mode 1490, energy is 473.10696, rmsd is 49.847305
sib.fastconf.EADock3: Minimizing binding mode 1491, energy is 473.36044, rmsd is 52.23552
sib.fastconf.EADock3: Minimizing binding mode 1492, energy is 473.59784, rmsd is 36.848095
sib.fastconf.EADock3: Minimizing binding mode 1493, energy is 473.80103, rmsd is 47.69825
sib.fastconf.EADock3: Minimizing binding mode 1494, energy is 474.37848, rmsd is 26.998695
sib.fastconf.EADock3: Minimizing binding mode 1495, energy is 474.49402, rmsd is 42.70676
sib.fastconf.EADock3: Minimizing binding mode 1496, energy is 475.4774, rmsd is 40.92452
sib.fastconf.EADock3: Minimizing binding mode 1497, energy is 475.58185, rmsd is 45.7949
sib.fastconf.EADock3: Minimizing binding mode 1498, energy is 478.03677, rmsd is 26.175491
sib.fastconf.EADock3: Minimizing binding mode 1499, energy is 478.05667, rmsd is 27.217905
sib.fastconf.EADock3: Minimizing binding mode 1500, energy is 478.07834, rmsd is 52.425762
sib.fastconf.EADock3: Minimizing binding mode 1501, energy is 478.4811, rmsd is 27.38252
sib.fastconf.EADock3: Minimizing binding mode 1502, energy is 479.98465, rmsd is 50.031483
sib.fastconf.EADock3: Minimizing binding mode 1503, energy is 480.2705, rmsd is 54.24684
sib.fastconf.EADock3: Minimizing binding mode 1504, energy is 480.32434, rmsd is 49.57345
sib.fastconf.EADock3: Minimizing binding mode 1505, energy is 480.58377, rmsd is 50.12526
sib.fastconf.EADock3: Minimizing binding mode 1506, energy is 481.56558, rmsd is 36.584915
sib.fastconf.EADock3: Minimizing binding mode 1507, energy is 481.98227, rmsd is 39.46102
sib.fastconf.EADock3: Minimizing binding mode 1508, energy is 481.98785, rmsd is 21.029093
sib.fastconf.EADock3: Minimizing binding mode 1509, energy is 482.21164, rmsd is 39.670273
sib.fastconf.EADock3: Minimizing binding mode 1510, energy is 482.71545, rmsd is 51.972015
sib.fastconf.EADock3: Minimizing binding mode 1511, energy is 483.20642, rmsd is 52.83843
sib.fastconf.EADock3: Minimizing binding mode 1512, energy is 483.48676, rmsd is 53.12465
sib.fastconf.EADock3: Minimizing binding mode 1513, energy is 483.85187, rmsd is 35.136845
sib.fastconf.EADock3: Minimizing binding mode 1514, energy is 484.20718, rmsd is 52.15571
sib.fastconf.EADock3: Minimizing binding mode 1515, energy is 484.2209, rmsd is 51.188873
sib.fastconf.EADock3: Minimizing binding mode 1516, energy is 484.2611, rmsd is 42.3524
sib.fastconf.EADock3: Minimizing binding mode 1517, energy is 484.91684, rmsd is 49.94547
sib.fastconf.EADock3: Minimizing binding mode 1518, energy is 485.23563, rmsd is 38.338783
sib.fastconf.EADock3: Minimizing binding mode 1519, energy is 485.55142, rmsd is 28.561478
sib.fastconf.EADock3: Minimizing binding mode 1520, energy is 486.0089, rmsd is 33.161926
sib.fastconf.EADock3: Minimizing binding mode 1521, energy is 486.05212, rmsd is 47.194645
sib.fastconf.EADock3: Minimizing binding mode 1522, energy is 486.3118, rmsd is 22.994072
sib.fastconf.EADock3: Minimizing binding mode 1523, energy is 486.88312, rmsd is 53.690845
sib.fastconf.EADock3: Minimizing binding mode 1524, energy is 486.88516, rmsd is 3.024506
sib.fastconf.EADock3: Minimizing binding mode 1525, energy is 487.5501, rmsd is 25.026814
sib.fastconf.EADock3: Minimizing binding mode 1526, energy is 487.71442, rmsd is 2.5567124
sib.fastconf.EADock3: Minimizing binding mode 1527, energy is 488.2521, rmsd is 29.166767
sib.fastconf.EADock3: Minimizing binding mode 1528, energy is 488.4624, rmsd is 52.63924
sib.fastconf.EADock3: Minimizing binding mode 1529, energy is 489.2575, rmsd is 54.48496
sib.fastconf.EADock3: Minimizing binding mode 1530, energy is 489.58148, rmsd is 1.5064528
sib.fastconf.EADock3: Minimizing binding mode 1531, energy is 489.70316, rmsd is 24.429659
sib.fastconf.EADock3: Minimizing binding mode 1532, energy is 490.23535, rmsd is 2.610599
sib.fastconf.EADock3: Minimizing binding mode 1533, energy is 490.5628, rmsd is 28.711683
sib.fastconf.EADock3: Minimizing binding mode 1534, energy is 490.77405, rmsd is 1.2082717
sib.fastconf.EADock3: Minimizing binding mode 1535, energy is 491.11053, rmsd is 44.33988
sib.fastconf.EADock3: Minimizing binding mode 1536, energy is 491.1198, rmsd is 40.554203
sib.fastconf.EADock3: Minimizing binding mode 1537, energy is 491.28973, rmsd is 35.484653
sib.fastconf.EADock3: Minimizing binding mode 1538, energy is 491.34674, rmsd is 46.095
sib.fastconf.EADock3: Minimizing binding mode 1539, energy is 491.38724, rmsd is 41.86367
sib.fastconf.EADock3: Minimizing binding mode 1540, energy is 491.39746, rmsd is 19.829226
sib.fastconf.EADock3: Minimizing binding mode 1541, energy is 491.93762, rmsd is 53.139523
sib.fastconf.EADock3: Minimizing binding mode 1542, energy is 492.37305, rmsd is 40.4312
sib.fastconf.EADock3: Minimizing binding mode 1543, energy is 492.40555, rmsd is 53.284786
sib.fastconf.EADock3: Minimizing binding mode 1544, energy is 492.56482, rmsd is 27.961906
sib.fastconf.EADock3: Minimizing binding mode 1545, energy is 493.12634, rmsd is 39.6096
sib.fastconf.EADock3: Minimizing binding mode 1546, energy is 493.2208, rmsd is 2.9792383
sib.fastconf.EADock3: Minimizing binding mode 1547, energy is 493.26013, rmsd is 46.197456
sib.fastconf.EADock3: Minimizing binding mode 1548, energy is 493.2887, rmsd is 3.416291
sib.fastconf.EADock3: Minimizing binding mode 1549, energy is 493.46588, rmsd is 22.43739
sib.fastconf.EADock3: Minimizing binding mode 1550, energy is 494.43903, rmsd is 45.76538
sib.fastconf.EADock3: Minimizing binding mode 1551, energy is 495.84305, rmsd is 20.894194
sib.fastconf.EADock3: Minimizing binding mode 1552, energy is 496.01465, rmsd is 49.266895
sib.fastconf.EADock3: Minimizing binding mode 1553, energy is 496.74783, rmsd is 36.76291
sib.fastconf.EADock3: Minimizing binding mode 1554, energy is 497.24084, rmsd is 49.27665
sib.fastconf.EADock3: Minimizing binding mode 1555, energy is 497.45593, rmsd is 55.020607
sib.fastconf.EADock3: Minimizing binding mode 1556, energy is 497.66602, rmsd is 54.451626
sib.fastconf.EADock3: Minimizing binding mode 1557, energy is 498.02142, rmsd is 29.907784
sib.fastconf.EADock3: Minimizing binding mode 1558, energy is 498.60678, rmsd is 3.177367
sib.fastconf.EADock3: Minimizing binding mode 1559, energy is 498.71698, rmsd is 28.039623
sib.fastconf.EADock3: Minimizing binding mode 1560, energy is 499.2887, rmsd is 44.523666
sib.fastconf.EADock3: Minimizing binding mode 1561, energy is 499.66135, rmsd is 22.213814
sib.fastconf.EADock3: Minimizing binding mode 1562, energy is 499.7892, rmsd is 30.049833
sib.fastconf.EADock3: Minimizing binding mode 1563, energy is 500.0612, rmsd is 22.476177
sib.fastconf.EADock3: Minimizing binding mode 1564, energy is 500.09778, rmsd is 2.587044
sib.fastconf.EADock3: Minimizing binding mode 1565, energy is 500.5481, rmsd is 20.736977
sib.fastconf.EADock3: Minimizing binding mode 1566, energy is 500.66345, rmsd is 51.10585
sib.fastconf.EADock3: Minimizing binding mode 1567, energy is 501.02576, rmsd is 51.108833
sib.fastconf.EADock3: Minimizing binding mode 1568, energy is 501.9801, rmsd is 39.686234
sib.fastconf.EADock3: Minimizing binding mode 1569, energy is 502.55984, rmsd is 2.4825902
sib.fastconf.EADock3: Minimizing binding mode 1570, energy is 503.00977, rmsd is 36.309532
sib.fastconf.EADock3: Minimizing binding mode 1571, energy is 503.85095, rmsd is 50.653847
sib.fastconf.EADock3: Minimizing binding mode 1572, energy is 504.6064, rmsd is 43.409775
sib.fastconf.EADock3: Minimizing binding mode 1573, energy is 504.9349, rmsd is 42.289562
sib.fastconf.EADock3: Minimizing binding mode 1574, energy is 505.98743, rmsd is 28.49523
sib.fastconf.EADock3: Minimizing binding mode 1575, energy is 506.2126, rmsd is 26.767073
sib.fastconf.EADock3: Minimizing binding mode 1576, energy is 506.29407, rmsd is 34.544483
sib.fastconf.EADock3: Minimizing binding mode 1577, energy is 506.46146, rmsd is 39.430733
sib.fastconf.EADock3: Minimizing binding mode 1578, energy is 507.22543, rmsd is 2.6231854
sib.fastconf.EADock3: Minimizing binding mode 1579, energy is 507.46124, rmsd is 34.96096
sib.fastconf.EADock3: Minimizing binding mode 1580, energy is 507.4688, rmsd is 50.085808
sib.fastconf.EADock3: Minimizing binding mode 1581, energy is 507.7208, rmsd is 23.074753
sib.fastconf.EADock3: Minimizing binding mode 1582, energy is 507.78326, rmsd is 21.452833
sib.fastconf.EADock3: Minimizing binding mode 1583, energy is 507.94565, rmsd is 37.453705
sib.fastconf.EADock3: Minimizing binding mode 1584, energy is 507.98392, rmsd is 23.179766
sib.fastconf.EADock3: Minimizing binding mode 1585, energy is 508.36594, rmsd is 3.5872805
sib.fastconf.EADock3: Minimizing binding mode 1586, energy is 508.4581, rmsd is 3.032147
sib.fastconf.EADock3: Minimizing binding mode 1587, energy is 508.59595, rmsd is 17.760405
sib.fastconf.EADock3: Minimizing binding mode 1588, energy is 508.71878, rmsd is 19.945993
sib.fastconf.EADock3: Minimizing binding mode 1589, energy is 508.99356, rmsd is 35.15278
sib.fastconf.EADock3: Minimizing binding mode 1590, energy is 509.15088, rmsd is 50.147686
sib.fastconf.EADock3: Minimizing binding mode 1591, energy is 509.43146, rmsd is 19.733778
sib.fastconf.EADock3: Minimizing binding mode 1592, energy is 510.04138, rmsd is 28.99354
sib.fastconf.EADock3: Minimizing binding mode 1593, energy is 510.3859, rmsd is 34.839638
sib.fastconf.EADock3: Minimizing binding mode 1594, energy is 510.73975, rmsd is 38.37936
sib.fastconf.EADock3: Minimizing binding mode 1595, energy is 511.09946, rmsd is 39.223473
sib.fastconf.EADock3: Minimizing binding mode 1596, energy is 511.33774, rmsd is 27.925388
sib.fastconf.EADock3: Minimizing binding mode 1597, energy is 511.9, rmsd is 27.697245
sib.fastconf.EADock3: Minimizing binding mode 1598, energy is 512.558, rmsd is 47.234436
sib.fastconf.EADock3: Minimizing binding mode 1599, energy is 512.68866, rmsd is 48.482933
sib.fastconf.EADock3: Minimizing binding mode 1600, energy is 512.83813, rmsd is 1.5315694
sib.fastconf.EADock3: Minimizing binding mode 1601, energy is 513.5348, rmsd is 36.76285
sib.fastconf.EADock3: Minimizing binding mode 1602, energy is 513.59686, rmsd is 48.71765
sib.fastconf.EADock3: Minimizing binding mode 1603, energy is 513.6304, rmsd is 21.736637
sib.fastconf.EADock3: Minimizing binding mode 1604, energy is 513.93475, rmsd is 37.052082
sib.fastconf.EADock3: Minimizing binding mode 1605, energy is 513.9911, rmsd is 26.34673
sib.fastconf.EADock3: Minimizing binding mode 1606, energy is 514.0335, rmsd is 38.421482
sib.fastconf.EADock3: Minimizing binding mode 1607, energy is 514.12067, rmsd is 37.99385
sib.fastconf.EADock3: Minimizing binding mode 1608, energy is 514.2451, rmsd is 35.542213
sib.fastconf.EADock3: Minimizing binding mode 1609, energy is 514.4478, rmsd is 32.928215
sib.fastconf.EADock3: Minimizing binding mode 1610, energy is 514.594, rmsd is 23.782082
sib.fastconf.EADock3: Minimizing binding mode 1611, energy is 514.79126, rmsd is 41.027573
sib.fastconf.EADock3: Minimizing binding mode 1612, energy is 515.295, rmsd is 33.89101
sib.fastconf.EADock3: Minimizing binding mode 1613, energy is 515.3567, rmsd is 3.2056777
sib.fastconf.EADock3: Minimizing binding mode 1614, energy is 515.7411, rmsd is 34.0352
sib.fastconf.EADock3: Minimizing binding mode 1615, energy is 516.50964, rmsd is 53.015617
sib.fastconf.EADock3: Minimizing binding mode 1616, energy is 516.84186, rmsd is 52.07139
sib.fastconf.EADock3: Minimizing binding mode 1617, energy is 517.3073, rmsd is 23.122873
sib.fastconf.EADock3: Minimizing binding mode 1618, energy is 517.3256, rmsd is 23.250732
sib.fastconf.EADock3: Minimizing binding mode 1619, energy is 517.4348, rmsd is 28.109732
sib.fastconf.EADock3: Minimizing binding mode 1620, energy is 518.9864, rmsd is 21.182997
sib.fastconf.EADock3: Minimizing binding mode 1621, energy is 519.0472, rmsd is 21.65575
sib.fastconf.EADock3: Minimizing binding mode 1622, energy is 519.4557, rmsd is 21.906658
sib.fastconf.EADock3: Minimizing binding mode 1623, energy is 519.74493, rmsd is 37.49899
sib.fastconf.EADock3: Minimizing binding mode 1624, energy is 519.79724, rmsd is 21.59675
sib.fastconf.EADock3: Minimizing binding mode 1625, energy is 520.21576, rmsd is 53.837963
sib.fastconf.EADock3: Minimizing binding mode 1626, energy is 520.6713, rmsd is 52.729095
sib.fastconf.EADock3: Minimizing binding mode 1627, energy is 521.60205, rmsd is 33.080772
sib.fastconf.EADock3: Minimizing binding mode 1628, energy is 521.87024, rmsd is 37.721786
sib.fastconf.EADock3: Minimizing binding mode 1629, energy is 522.39734, rmsd is 21.491152
sib.fastconf.EADock3: Minimizing binding mode 1630, energy is 522.6795, rmsd is 24.914696
sib.fastconf.EADock3: Minimizing binding mode 1631, energy is 522.747, rmsd is 20.861546
sib.fastconf.EADock3: Minimizing binding mode 1632, energy is 522.94714, rmsd is 28.223814
sib.fastconf.EADock3: Minimizing binding mode 1633, energy is 523.47516, rmsd is 27.07146
sib.fastconf.EADock3: Minimizing binding mode 1634, energy is 523.50275, rmsd is 17.387966
sib.fastconf.EADock3: Minimizing binding mode 1635, energy is 524.08545, rmsd is 37.186646
sib.fastconf.EADock3: Minimizing binding mode 1636, energy is 524.25964, rmsd is 40.005733
sib.fastconf.EADock3: Minimizing binding mode 1637, energy is 524.32153, rmsd is 22.335838
sib.fastconf.EADock3: Minimizing binding mode 1638, energy is 524.42035, rmsd is 37.50643
sib.fastconf.EADock3: Minimizing binding mode 1639, energy is 524.50836, rmsd is 38.604313
sib.fastconf.EADock3: Minimizing binding mode 1640, energy is 524.71234, rmsd is 28.496052
sib.fastconf.EADock3: Minimizing binding mode 1641, energy is 524.8189, rmsd is 48.864624
sib.fastconf.EADock3: Minimizing binding mode 1642, energy is 525.03455, rmsd is 47.70542
sib.fastconf.EADock3: Minimizing binding mode 1643, energy is 525.1603, rmsd is 19.119576
sib.fastconf.EADock3: Minimizing binding mode 1644, energy is 525.90564, rmsd is 20.542255
sib.fastconf.EADock3: Minimizing binding mode 1645, energy is 526.54254, rmsd is 38.713097
sib.fastconf.EADock3: Minimizing binding mode 1646, energy is 526.7733, rmsd is 36.799824
sib.fastconf.EADock3: Minimizing binding mode 1647, energy is 526.882, rmsd is 29.107145
sib.fastconf.EADock3: Minimizing binding mode 1648, energy is 526.9522, rmsd is 34.111485
sib.fastconf.EADock3: Minimizing binding mode 1649, energy is 527.29193, rmsd is 51.353024
sib.fastconf.EADock3: Minimizing binding mode 1650, energy is 528.1336, rmsd is 33.63635
sib.fastconf.EADock3: Minimizing binding mode 1651, energy is 528.2149, rmsd is 22.725471
sib.fastconf.EADock3: Minimizing binding mode 1652, energy is 528.9941, rmsd is 21.240606
sib.fastconf.EADock3: Minimizing binding mode 1653, energy is 529.08923, rmsd is 52.524967
sib.fastconf.EADock3: Minimizing binding mode 1654, energy is 529.5613, rmsd is 37.66149
sib.fastconf.EADock3: Minimizing binding mode 1655, energy is 530.51117, rmsd is 3.388172
sib.fastconf.EADock3: Minimizing binding mode 1656, energy is 530.7815, rmsd is 46.649788
sib.fastconf.EADock3: Minimizing binding mode 1657, energy is 531.48126, rmsd is 53.26907
sib.fastconf.EADock3: Minimizing binding mode 1658, energy is 531.73816, rmsd is 43.228237
sib.fastconf.EADock3: Minimizing binding mode 1659, energy is 531.7882, rmsd is 34.99949
sib.fastconf.EADock3: Minimizing binding mode 1660, energy is 532.3034, rmsd is 27.002514
sib.fastconf.EADock3: Minimizing binding mode 1661, energy is 532.8724, rmsd is 27.553282
sib.fastconf.EADock3: Minimizing binding mode 1662, energy is 532.9438, rmsd is 36.104603
sib.fastconf.EADock3: Minimizing binding mode 1663, energy is 534.0626, rmsd is 2.6930504
sib.fastconf.EADock3: Minimizing binding mode 1664, energy is 534.8247, rmsd is 22.51599
sib.fastconf.EADock3: Minimizing binding mode 1665, energy is 535.76013, rmsd is 20.02805
sib.fastconf.EADock3: Minimizing binding mode 1666, energy is 535.93024, rmsd is 34.70847
sib.fastconf.EADock3: Minimizing binding mode 1667, energy is 536.21094, rmsd is 26.028706
sib.fastconf.EADock3: Minimizing binding mode 1668, energy is 536.848, rmsd is 36.322727
sib.fastconf.EADock3: Minimizing binding mode 1669, energy is 537.20386, rmsd is 47.090008
sib.fastconf.EADock3: Minimizing binding mode 1670, energy is 538.64484, rmsd is 1.2686749
sib.fastconf.EADock3: Minimizing binding mode 1671, energy is 538.8462, rmsd is 18.334831
sib.fastconf.EADock3: Minimizing binding mode 1672, energy is 538.9969, rmsd is 22.63744
sib.fastconf.EADock3: Minimizing binding mode 1673, energy is 539.1029, rmsd is 54.365356
sib.fastconf.EADock3: Minimizing binding mode 1674, energy is 539.283, rmsd is 21.98698
sib.fastconf.EADock3: Minimizing binding mode 1675, energy is 539.8344, rmsd is 54.55104
sib.fastconf.EADock3: Minimizing binding mode 1676, energy is 540.7554, rmsd is 51.264526
sib.fastconf.EADock3: Minimizing binding mode 1677, energy is 541.0381, rmsd is 26.2336
sib.fastconf.EADock3: Minimizing binding mode 1678, energy is 541.3683, rmsd is 20.51713
sib.fastconf.EADock3: Minimizing binding mode 1679, energy is 541.70764, rmsd is 35.312828
sib.fastconf.EADock3: Minimizing binding mode 1680, energy is 542.14685, rmsd is 21.899494
sib.fastconf.EADock3: Minimizing binding mode 1681, energy is 542.19934, rmsd is 2.2216232
sib.fastconf.EADock3: Minimizing binding mode 1682, energy is 542.31323, rmsd is 44.91618
sib.fastconf.EADock3: Minimizing binding mode 1683, energy is 542.5647, rmsd is 38.17424
sib.fastconf.EADock3: Minimizing binding mode 1684, energy is 542.609, rmsd is 23.315569
sib.fastconf.EADock3: Minimizing binding mode 1685, energy is 542.76794, rmsd is 21.170118
sib.fastconf.EADock3: Minimizing binding mode 1686, energy is 543.10535, rmsd is 21.644077
sib.fastconf.EADock3: Minimizing binding mode 1687, energy is 543.4691, rmsd is 44.219883
sib.fastconf.EADock3: Minimizing binding mode 1688, energy is 543.5789, rmsd is 23.301233
sib.fastconf.EADock3: Minimizing binding mode 1689, energy is 544.2134, rmsd is 51.327274
sib.fastconf.EADock3: Minimizing binding mode 1690, energy is 544.7219, rmsd is 53.437946
sib.fastconf.EADock3: Minimizing binding mode 1691, energy is 545.0107, rmsd is 22.339684
sib.fastconf.EADock3: Minimizing binding mode 1692, energy is 545.81976, rmsd is 3.2742376
sib.fastconf.EADock3: Minimizing binding mode 1693, energy is 546.4337, rmsd is 43.226902
sib.fastconf.EADock3: Minimizing binding mode 1694, energy is 547.6564, rmsd is 49.39865
sib.fastconf.EADock3: Minimizing binding mode 1695, energy is 547.7295, rmsd is 24.423204
sib.fastconf.EADock3: Minimizing binding mode 1696, energy is 547.78394, rmsd is 22.865215
sib.fastconf.EADock3: Minimizing binding mode 1697, energy is 548.01575, rmsd is 50.663696
sib.fastconf.EADock3: Minimizing binding mode 1698, energy is 548.1867, rmsd is 28.96986
sib.fastconf.EADock3: Minimizing binding mode 1699, energy is 548.81055, rmsd is 49.3479
sib.fastconf.EADock3: Minimizing binding mode 1700, energy is 549.0585, rmsd is 3.0192869
sib.fastconf.EADock3: Minimizing binding mode 1701, energy is 549.22766, rmsd is 44.11955
sib.fastconf.EADock3: Minimizing binding mode 1702, energy is 549.74805, rmsd is 50.889282
sib.fastconf.EADock3: Minimizing binding mode 1703, energy is 549.96405, rmsd is 53.209957
sib.fastconf.EADock3: Minimizing binding mode 1704, energy is 550.18164, rmsd is 22.710285
sib.fastconf.EADock3: Minimizing binding mode 1705, energy is 550.2198, rmsd is 35.40598
sib.fastconf.EADock3: Minimizing binding mode 1706, energy is 550.837, rmsd is 21.32351
sib.fastconf.EADock3: Minimizing binding mode 1707, energy is 551.5475, rmsd is 19.457684
sib.fastconf.EADock3: Minimizing binding mode 1708, energy is 551.68, rmsd is 37.876007
sib.fastconf.EADock3: Minimizing binding mode 1709, energy is 551.72284, rmsd is 21.705364
sib.fastconf.EADock3: Minimizing binding mode 1710, energy is 551.9824, rmsd is 20.90114
sib.fastconf.EADock3: Minimizing binding mode 1711, energy is 551.98444, rmsd is 36.59428
sib.fastconf.EADock3: Minimizing binding mode 1712, energy is 552.6731, rmsd is 52.389355
sib.fastconf.EADock3: Minimizing binding mode 1713, energy is 552.83276, rmsd is 20.931189
sib.fastconf.EADock3: Minimizing binding mode 1714, energy is 552.8496, rmsd is 40.659443
sib.fastconf.EADock3: Minimizing binding mode 1715, energy is 552.9157, rmsd is 34.713493
sib.fastconf.EADock3: Minimizing binding mode 1716, energy is 553.38043, rmsd is 29.437098
sib.fastconf.EADock3: Minimizing binding mode 1717, energy is 553.4205, rmsd is 29.229853
sib.fastconf.EADock3: Minimizing binding mode 1718, energy is 553.7528, rmsd is 47.108017
sib.fastconf.EADock3: Minimizing binding mode 1719, energy is 553.95416, rmsd is 28.9685
sib.fastconf.EADock3: Minimizing binding mode 1720, energy is 554.092, rmsd is 19.771126
sib.fastconf.EADock3: Minimizing binding mode 1721, energy is 554.6237, rmsd is 36.138226
sib.fastconf.EADock3: Minimizing binding mode 1722, energy is 555.2362, rmsd is 24.897444
sib.fastconf.EADock3: Minimizing binding mode 1723, energy is 555.64825, rmsd is 52.571648
sib.fastconf.EADock3: Minimizing binding mode 1724, energy is 555.8106, rmsd is 47.658974
sib.fastconf.EADock3: Minimizing binding mode 1725, energy is 556.0984, rmsd is 52.836735
sib.fastconf.EADock3: Minimizing binding mode 1726, energy is 556.36884, rmsd is 21.347702
sib.fastconf.EADock3: Minimizing binding mode 1727, energy is 556.6771, rmsd is 53.882614
sib.fastconf.EADock3: Minimizing binding mode 1728, energy is 556.93427, rmsd is 28.366533
sib.fastconf.EADock3: Minimizing binding mode 1729, energy is 556.9849, rmsd is 19.7832
sib.fastconf.EADock3: Minimizing binding mode 1730, energy is 557.37775, rmsd is 35.123943
sib.fastconf.EADock3: Minimizing binding mode 1731, energy is 557.677, rmsd is 50.533146
sib.fastconf.EADock3: Minimizing binding mode 1732, energy is 558.8063, rmsd is 53.45302
sib.fastconf.EADock3: Minimizing binding mode 1733, energy is 560.0378, rmsd is 37.28592
sib.fastconf.EADock3: Minimizing binding mode 1734, energy is 560.1177, rmsd is 36.668335
sib.fastconf.EADock3: Minimizing binding mode 1735, energy is 560.1648, rmsd is 42.19984
sib.fastconf.EADock3: Minimizing binding mode 1736, energy is 560.39276, rmsd is 20.572443
sib.fastconf.EADock3: Minimizing binding mode 1737, energy is 560.7179, rmsd is 21.960629
sib.fastconf.EADock3: Minimizing binding mode 1738, energy is 561.4697, rmsd is 49.791706
sib.fastconf.EADock3: Minimizing binding mode 1739, energy is 562.5675, rmsd is 20.568623
sib.fastconf.EADock3: Minimizing binding mode 1740, energy is 563.0783, rmsd is 35.04305
sib.fastconf.EADock3: Minimizing binding mode 1741, energy is 563.13763, rmsd is 53.128185
sib.fastconf.EADock3: Minimizing binding mode 1742, energy is 563.2301, rmsd is 22.976803
sib.fastconf.EADock3: Minimizing binding mode 1743, energy is 563.6848, rmsd is 34.21149
sib.fastconf.EADock3: Minimizing binding mode 1744, energy is 563.80066, rmsd is 54.593987
sib.fastconf.EADock3: Minimizing binding mode 1745, energy is 564.3891, rmsd is 22.440914
sib.fastconf.EADock3: Minimizing binding mode 1746, energy is 564.7374, rmsd is 30.39698
sib.fastconf.EADock3: Minimizing binding mode 1747, energy is 565.0921, rmsd is 39.22258
sib.fastconf.EADock3: Minimizing binding mode 1748, energy is 566.5901, rmsd is 39.83674
sib.fastconf.EADock3: Minimizing binding mode 1749, energy is 568.00977, rmsd is 21.677944
sib.fastconf.EADock3: Minimizing binding mode 1750, energy is 568.433, rmsd is 28.605556
sib.fastconf.EADock3: Minimizing binding mode 1751, energy is 568.7427, rmsd is 33.06084
sib.fastconf.EADock3: Minimizing binding mode 1752, energy is 569.2828, rmsd is 36.128048
sib.fastconf.EADock3: Minimizing binding mode 1753, energy is 569.6938, rmsd is 48.68574
sib.fastconf.EADock3: Minimizing binding mode 1754, energy is 570.166, rmsd is 38.18731
sib.fastconf.EADock3: Minimizing binding mode 1755, energy is 570.3169, rmsd is 2.1446009
sib.fastconf.EADock3: Minimizing binding mode 1756, energy is 570.63257, rmsd is 53.31072
sib.fastconf.EADock3: Minimizing binding mode 1757, energy is 571.25525, rmsd is 27.575367
sib.fastconf.EADock3: Minimizing binding mode 1758, energy is 572.10675, rmsd is 36.264572
sib.fastconf.EADock3: Minimizing binding mode 1759, energy is 572.3267, rmsd is 38.5471
sib.fastconf.EADock3: Minimizing binding mode 1760, energy is 572.41455, rmsd is 53.41789
sib.fastconf.EADock3: Minimizing binding mode 1761, energy is 572.47107, rmsd is 38.57093
sib.fastconf.EADock3: Minimizing binding mode 1762, energy is 572.47406, rmsd is 47.91263
sib.fastconf.EADock3: Minimizing binding mode 1763, energy is 572.85345, rmsd is 38.04836
sib.fastconf.EADock3: Minimizing binding mode 1764, energy is 573.4474, rmsd is 43.31887
sib.fastconf.EADock3: Minimizing binding mode 1765, energy is 573.7146, rmsd is 27.42816
sib.fastconf.EADock3: Minimizing binding mode 1766, energy is 573.7733, rmsd is 33.489437
sib.fastconf.EADock3: Minimizing binding mode 1767, energy is 574.72034, rmsd is 54.273373
sib.fastconf.EADock3: Minimizing binding mode 1768, energy is 574.874, rmsd is 35.283653
sib.fastconf.EADock3: Minimizing binding mode 1769, energy is 576.49255, rmsd is 38.088997
sib.fastconf.EADock3: Minimizing binding mode 1770, energy is 576.5818, rmsd is 50.055656
sib.fastconf.EADock3: Minimizing binding mode 1771, energy is 576.7453, rmsd is 45.983356
sib.fastconf.EADock3: Minimizing binding mode 1772, energy is 577.04175, rmsd is 44.98388
sib.fastconf.EADock3: Minimizing binding mode 1773, energy is 577.0469, rmsd is 53.408783
sib.fastconf.EADock3: Minimizing binding mode 1774, energy is 577.3968, rmsd is 45.049995
sib.fastconf.EADock3: Minimizing binding mode 1775, energy is 577.6889, rmsd is 17.407213
sib.fastconf.EADock3: Minimizing binding mode 1776, energy is 578.15393, rmsd is 31.1906
sib.fastconf.EADock3: Minimizing binding mode 1777, energy is 578.37964, rmsd is 36.16836
sib.fastconf.EADock3: Minimizing binding mode 1778, energy is 578.5613, rmsd is 34.70343
sib.fastconf.EADock3: Minimizing binding mode 1779, energy is 579.17706, rmsd is 50.56585
sib.fastconf.EADock3: Minimizing binding mode 1780, energy is 579.5833, rmsd is 37.80097
sib.fastconf.EADock3: Minimizing binding mode 1781, energy is 579.6452, rmsd is 27.634552
sib.fastconf.EADock3: Minimizing binding mode 1782, energy is 579.6813, rmsd is 29.402025
sib.fastconf.EADock3: Minimizing binding mode 1783, energy is 580.09436, rmsd is 52.087513
sib.fastconf.EADock3: Minimizing binding mode 1784, energy is 580.1173, rmsd is 43.80966
sib.fastconf.EADock3: Minimizing binding mode 1785, energy is 580.20526, rmsd is 30.686445
sib.fastconf.EADock3: Minimizing binding mode 1786, energy is 580.358, rmsd is 50.234226
sib.fastconf.EADock3: Minimizing binding mode 1787, energy is 580.9815, rmsd is 2.9245777
sib.fastconf.EADock3: Minimizing binding mode 1788, energy is 581.0347, rmsd is 37.055515
sib.fastconf.EADock3: Minimizing binding mode 1789, energy is 582.1257, rmsd is 36.03623
sib.fastconf.EADock3: Minimizing binding mode 1790, energy is 582.24066, rmsd is 19.737925
sib.fastconf.EADock3: Minimizing binding mode 1791, energy is 582.43066, rmsd is 21.737753
sib.fastconf.EADock3: Minimizing binding mode 1792, energy is 583.18207, rmsd is 35.854233
sib.fastconf.EADock3: Minimizing binding mode 1793, energy is 583.24963, rmsd is 3.5977504
sib.fastconf.EADock3: Minimizing binding mode 1794, energy is 583.40546, rmsd is 38.916492
sib.fastconf.EADock3: Minimizing binding mode 1795, energy is 583.4433, rmsd is 35.94304
sib.fastconf.EADock3: Minimizing binding mode 1796, energy is 584.16656, rmsd is 43.50842
sib.fastconf.EADock3: Minimizing binding mode 1797, energy is 584.23566, rmsd is 3.2146897
sib.fastconf.EADock3: Minimizing binding mode 1798, energy is 584.78784, rmsd is 52.56381
sib.fastconf.EADock3: Minimizing binding mode 1799, energy is 584.8433, rmsd is 36.261528
sib.fastconf.EADock3: Minimizing binding mode 1800, energy is 584.9595, rmsd is 2.9760187
sib.fastconf.EADock3: Minimizing binding mode 1801, energy is 584.9737, rmsd is 3.3550353
sib.fastconf.EADock3: Minimizing binding mode 1802, energy is 585.20233, rmsd is 50.718315
sib.fastconf.EADock3: Minimizing binding mode 1803, energy is 585.7606, rmsd is 52.019585
sib.fastconf.EADock3: Minimizing binding mode 1804, energy is 586.01514, rmsd is 53.42167
sib.fastconf.EADock3: Minimizing binding mode 1805, energy is 586.4151, rmsd is 22.791021
sib.fastconf.EADock3: Minimizing binding mode 1806, energy is 586.9363, rmsd is 3.5064814
sib.fastconf.EADock3: Minimizing binding mode 1807, energy is 587.40283, rmsd is 49.81149
sib.fastconf.EADock3: Minimizing binding mode 1808, energy is 587.51025, rmsd is 2.660818
sib.fastconf.EADock3: Minimizing binding mode 1809, energy is 587.6633, rmsd is 21.380615
sib.fastconf.EADock3: Minimizing binding mode 1810, energy is 587.7244, rmsd is 24.433765
sib.fastconf.EADock3: Minimizing binding mode 1811, energy is 588.3699, rmsd is 19.391975
sib.fastconf.EADock3: Minimizing binding mode 1812, energy is 588.5565, rmsd is 24.442709
sib.fastconf.EADock3: Minimizing binding mode 1813, energy is 588.8068, rmsd is 19.702908
sib.fastconf.EADock3: Minimizing binding mode 1814, energy is 589.1364, rmsd is 35.819473
sib.fastconf.EADock3: Minimizing binding mode 1815, energy is 589.45483, rmsd is 40.40086
sib.fastconf.EADock3: Minimizing binding mode 1816, energy is 589.63135, rmsd is 66.00482
sib.fastconf.EADock3: Minimizing binding mode 1817, energy is 589.84186, rmsd is 55.136387
sib.fastconf.EADock3: Minimizing binding mode 1818, energy is 590.40356, rmsd is 46.776844
sib.fastconf.EADock3: Minimizing binding mode 1819, energy is 590.4437, rmsd is 23.217148
sib.fastconf.EADock3: Minimizing binding mode 1820, energy is 590.48987, rmsd is 20.608633
sib.fastconf.EADock3: Minimizing binding mode 1821, energy is 590.64056, rmsd is 51.92376
sib.fastconf.EADock3: Minimizing binding mode 1822, energy is 591.0033, rmsd is 50.64875
sib.fastconf.EADock3: Minimizing binding mode 1823, energy is 591.0865, rmsd is 48.22164
sib.fastconf.EADock3: Minimizing binding mode 1824, energy is 591.6246, rmsd is 29.770542
sib.fastconf.EADock3: Minimizing binding mode 1825, energy is 592.0045, rmsd is 50.10899
sib.fastconf.EADock3: Minimizing binding mode 1826, energy is 592.43713, rmsd is 35.287235
sib.fastconf.EADock3: Minimizing binding mode 1827, energy is 592.9274, rmsd is 38.504227
sib.fastconf.EADock3: Minimizing binding mode 1828, energy is 593.0593, rmsd is 45.681633
sib.fastconf.EADock3: Minimizing binding mode 1829, energy is 593.916, rmsd is 3.0629582
sib.fastconf.EADock3: Minimizing binding mode 1830, energy is 594.1161, rmsd is 48.0866
sib.fastconf.EADock3: Minimizing binding mode 1831, energy is 594.817, rmsd is 50.999863
sib.fastconf.EADock3: Minimizing binding mode 1832, energy is 594.95264, rmsd is 51.910778
sib.fastconf.EADock3: Minimizing binding mode 1833, energy is 595.21436, rmsd is 22.97814
sib.fastconf.EADock3: Minimizing binding mode 1834, energy is 595.3945, rmsd is 22.320642
sib.fastconf.EADock3: Minimizing binding mode 1835, energy is 595.63275, rmsd is 44.25184
sib.fastconf.EADock3: Minimizing binding mode 1836, energy is 596.2496, rmsd is 51.83158
sib.fastconf.EADock3: Minimizing binding mode 1837, energy is 596.4723, rmsd is 21.626503
sib.fastconf.EADock3: Minimizing binding mode 1838, energy is 596.5826, rmsd is 45.671085
sib.fastconf.EADock3: Minimizing binding mode 1839, energy is 596.67834, rmsd is 33.92022
sib.fastconf.EADock3: Minimizing binding mode 1840, energy is 597.38776, rmsd is 42.27987
sib.fastconf.EADock3: Minimizing binding mode 1841, energy is 598.1946, rmsd is 53.403027
sib.fastconf.EADock3: Minimizing binding mode 1842, energy is 599.5907, rmsd is 55.647484
sib.fastconf.EADock3: Minimizing binding mode 1843, energy is 599.66113, rmsd is 32.110874
sib.fastconf.EADock3: Minimizing binding mode 1844, energy is 599.66614, rmsd is 27.204298
sib.fastconf.EADock3: Minimizing binding mode 1845, energy is 599.7718, rmsd is 31.304567
sib.fastconf.EADock3: Minimizing binding mode 1846, energy is 600.1735, rmsd is 22.816072
sib.fastconf.EADock3: Minimizing binding mode 1847, energy is 600.3856, rmsd is 23.816992
sib.fastconf.EADock3: Minimizing binding mode 1848, energy is 600.6508, rmsd is 49.720657
sib.fastconf.EADock3: Minimizing binding mode 1849, energy is 601.1556, rmsd is 20.015226
sib.fastconf.EADock3: Minimizing binding mode 1850, energy is 601.36804, rmsd is 50.487865
sib.fastconf.EADock3: Minimizing binding mode 1851, energy is 601.4297, rmsd is 20.317938
sib.fastconf.EADock3: Minimizing binding mode 1852, energy is 601.6184, rmsd is 21.994978
sib.fastconf.EADock3: Minimizing binding mode 1853, energy is 602.0603, rmsd is 38.053795
sib.fastconf.EADock3: Minimizing binding mode 1854, energy is 604.72003, rmsd is 39.910213
sib.fastconf.EADock3: Minimizing binding mode 1855, energy is 606.19366, rmsd is 53.01889
sib.fastconf.EADock3: Minimizing binding mode 1856, energy is 606.28766, rmsd is 2.6527221
sib.fastconf.EADock3: Minimizing binding mode 1857, energy is 606.55096, rmsd is 52.815006
sib.fastconf.EADock3: Minimizing binding mode 1858, energy is 606.83746, rmsd is 21.573236
sib.fastconf.EADock3: Minimizing binding mode 1859, energy is 606.94025, rmsd is 27.000282
sib.fastconf.EADock3: Minimizing binding mode 1860, energy is 607.4766, rmsd is 29.093542
sib.fastconf.EADock3: Minimizing binding mode 1861, energy is 608.4698, rmsd is 24.307787
sib.fastconf.EADock3: Minimizing binding mode 1862, energy is 608.653, rmsd is 26.749477
sib.fastconf.EADock3: Minimizing binding mode 1863, energy is 609.0169, rmsd is 52.378597
sib.fastconf.EADock3: Minimizing binding mode 1864, energy is 609.20166, rmsd is 22.924019
sib.fastconf.EADock3: Minimizing binding mode 1865, energy is 609.3304, rmsd is 22.795773
sib.fastconf.EADock3: Minimizing binding mode 1866, energy is 609.59503, rmsd is 43.360703
sib.fastconf.EADock3: Minimizing binding mode 1867, energy is 609.81146, rmsd is 52.793514
sib.fastconf.EADock3: Minimizing binding mode 1868, energy is 610.03094, rmsd is 23.379911
sib.fastconf.EADock3: Minimizing binding mode 1869, energy is 610.44275, rmsd is 46.727245
sib.fastconf.EADock3: Minimizing binding mode 1870, energy is 610.9898, rmsd is 38.083317
sib.fastconf.EADock3: Minimizing binding mode 1871, energy is 611.6147, rmsd is 26.36895
sib.fastconf.EADock3: Minimizing binding mode 1872, energy is 611.7959, rmsd is 26.931627
sib.fastconf.EADock3: Minimizing binding mode 1873, energy is 611.8206, rmsd is 22.129183
sib.fastconf.EADock3: Minimizing binding mode 1874, energy is 611.8543, rmsd is 23.388872
sib.fastconf.EADock3: Minimizing binding mode 1875, energy is 611.85736, rmsd is 37.961292
sib.fastconf.EADock3: Minimizing binding mode 1876, energy is 612.1866, rmsd is 20.900839
sib.fastconf.EADock3: Minimizing binding mode 1877, energy is 612.435, rmsd is 27.921383
sib.fastconf.EADock3: Minimizing binding mode 1878, energy is 612.59467, rmsd is 19.89788
sib.fastconf.EADock3: Minimizing binding mode 1879, energy is 612.6564, rmsd is 35.929604
sib.fastconf.EADock3: Minimizing binding mode 1880, energy is 613.4159, rmsd is 26.808598
sib.fastconf.EADock3: Minimizing binding mode 1881, energy is 613.4494, rmsd is 2.1583462
sib.fastconf.EADock3: Minimizing binding mode 1882, energy is 614.4716, rmsd is 24.457712
sib.fastconf.EADock3: Minimizing binding mode 1883, energy is 614.71594, rmsd is 48.8774
sib.fastconf.EADock3: Minimizing binding mode 1884, energy is 614.7198, rmsd is 48.766064
sib.fastconf.EADock3: Minimizing binding mode 1885, energy is 614.8606, rmsd is 24.766735
sib.fastconf.EADock3: Minimizing binding mode 1886, energy is 616.0505, rmsd is 50.260815
sib.fastconf.EADock3: Minimizing binding mode 1887, energy is 616.18726, rmsd is 26.781767
sib.fastconf.EADock3: Minimizing binding mode 1888, energy is 616.9228, rmsd is 38.022243
sib.fastconf.EADock3: Minimizing binding mode 1889, energy is 616.9767, rmsd is 36.61711
sib.fastconf.EADock3: Minimizing binding mode 1890, energy is 617.2502, rmsd is 37.30504
sib.fastconf.EADock3: Minimizing binding mode 1891, energy is 617.70514, rmsd is 46.678093
sib.fastconf.EADock3: Minimizing binding mode 1892, energy is 617.73413, rmsd is 39.840805
sib.fastconf.EADock3: Minimizing binding mode 1893, energy is 618.8677, rmsd is 23.706303
sib.fastconf.EADock3: Minimizing binding mode 1894, energy is 619.8693, rmsd is 2.461611
sib.fastconf.EADock3: Minimizing binding mode 1895, energy is 620.1928, rmsd is 22.172743
sib.fastconf.EADock3: Minimizing binding mode 1896, energy is 620.61194, rmsd is 47.02344
sib.fastconf.EADock3: Minimizing binding mode 1897, energy is 620.83685, rmsd is 40.101055
sib.fastconf.EADock3: Minimizing binding mode 1898, energy is 620.8805, rmsd is 27.010029
sib.fastconf.EADock3: Minimizing binding mode 1899, energy is 621.0118, rmsd is 21.676146
sib.fastconf.EADock3: Minimizing binding mode 1900, energy is 621.1665, rmsd is 52.035927
sib.fastconf.EADock3: Minimizing binding mode 1901, energy is 621.82074, rmsd is 14.981751
sib.fastconf.EADock3: Minimizing binding mode 1902, energy is 622.7464, rmsd is 1.9362428
sib.fastconf.EADock3: Minimizing binding mode 1903, energy is 622.84796, rmsd is 50.18139
sib.fastconf.EADock3: Minimizing binding mode 1904, energy is 623.3396, rmsd is 50.8405
sib.fastconf.EADock3: Minimizing binding mode 1905, energy is 623.357, rmsd is 51.368668
sib.fastconf.EADock3: Minimizing binding mode 1906, energy is 623.42444, rmsd is 40.459206
sib.fastconf.EADock3: Minimizing binding mode 1907, energy is 624.44916, rmsd is 49.523586
sib.fastconf.EADock3: Minimizing binding mode 1908, energy is 624.46735, rmsd is 24.201302
sib.fastconf.EADock3: Minimizing binding mode 1909, energy is 624.48285, rmsd is 47.475456
sib.fastconf.EADock3: Minimizing binding mode 1910, energy is 624.5137, rmsd is 29.244202
sib.fastconf.EADock3: Minimizing binding mode 1911, energy is 624.6407, rmsd is 26.848408
sib.fastconf.EADock3: Minimizing binding mode 1912, energy is 624.6531, rmsd is 22.932503
sib.fastconf.EADock3: Minimizing binding mode 1913, energy is 624.73004, rmsd is 21.055573
sib.fastconf.EADock3: Minimizing binding mode 1914, energy is 625.5262, rmsd is 52.312355
sib.fastconf.EADock3: Minimizing binding mode 1915, energy is 626.1872, rmsd is 37.297695
sib.fastconf.EADock3: Minimizing binding mode 1916, energy is 626.23834, rmsd is 39.92929
sib.fastconf.EADock3: Minimizing binding mode 1917, energy is 626.6052, rmsd is 37.702232
sib.fastconf.EADock3: Minimizing binding mode 1918, energy is 626.75415, rmsd is 2.6716216
sib.fastconf.EADock3: Minimizing binding mode 1919, energy is 626.7755, rmsd is 20.792515
sib.fastconf.EADock3: Minimizing binding mode 1920, energy is 626.9765, rmsd is 40.115944
sib.fastconf.EADock3: Minimizing binding mode 1921, energy is 627.7642, rmsd is 23.156868
sib.fastconf.EADock3: Minimizing binding mode 1922, energy is 628.22925, rmsd is 20.509733
sib.fastconf.EADock3: Minimizing binding mode 1923, energy is 628.27484, rmsd is 43.218945
sib.fastconf.EADock3: Minimizing binding mode 1924, energy is 628.2777, rmsd is 44.192047
sib.fastconf.EADock3: Minimizing binding mode 1925, energy is 628.37933, rmsd is 34.772766
sib.fastconf.EADock3: Minimizing binding mode 1926, energy is 628.4936, rmsd is 21.196226
sib.fastconf.EADock3: Minimizing binding mode 1927, energy is 628.5489, rmsd is 43.86927
sib.fastconf.EADock3: Minimizing binding mode 1928, energy is 628.62024, rmsd is 53.766243
sib.fastconf.EADock3: Minimizing binding mode 1929, energy is 628.7125, rmsd is 42.821198
sib.fastconf.EADock3: Minimizing binding mode 1930, energy is 628.8909, rmsd is 22.818516
sib.fastconf.EADock3: Minimizing binding mode 1931, energy is 629.4669, rmsd is 21.966763
sib.fastconf.EADock3: Minimizing binding mode 1932, energy is 629.5564, rmsd is 39.568184
sib.fastconf.EADock3: Minimizing binding mode 1933, energy is 630.1778, rmsd is 2.9820457
sib.fastconf.EADock3: Minimizing binding mode 1934, energy is 630.6534, rmsd is 23.981619
sib.fastconf.EADock3: Minimizing binding mode 1935, energy is 630.6722, rmsd is 21.532986
sib.fastconf.EADock3: Minimizing binding mode 1936, energy is 630.8648, rmsd is 26.513672
sib.fastconf.EADock3: Minimizing binding mode 1937, energy is 630.92883, rmsd is 23.041138
sib.fastconf.EADock3: Minimizing binding mode 1938, energy is 631.0227, rmsd is 2.7611673
sib.fastconf.EADock3: Minimizing binding mode 1939, energy is 631.4037, rmsd is 36.39947
sib.fastconf.EADock3: Minimizing binding mode 1940, energy is 632.0419, rmsd is 50.61259
sib.fastconf.EADock3: Minimizing binding mode 1941, energy is 632.2402, rmsd is 53.574593
sib.fastconf.EADock3: Minimizing binding mode 1942, energy is 632.4612, rmsd is 30.371544
sib.fastconf.EADock3: Minimizing binding mode 1943, energy is 632.49207, rmsd is 36.431175
sib.fastconf.EADock3: Minimizing binding mode 1944, energy is 632.54816, rmsd is 29.269024
sib.fastconf.EADock3: Minimizing binding mode 1945, energy is 632.6209, rmsd is 25.184761
sib.fastconf.EADock3: Minimizing binding mode 1946, energy is 632.8293, rmsd is 38.658035
sib.fastconf.EADock3: Minimizing binding mode 1947, energy is 633.2056, rmsd is 34.401497
sib.fastconf.EADock3: Minimizing binding mode 1948, energy is 633.4357, rmsd is 34.51808
sib.fastconf.EADock3: Minimizing binding mode 1949, energy is 633.5832, rmsd is 35.290962
sib.fastconf.EADock3: Minimizing binding mode 1950, energy is 634.06915, rmsd is 22.274605
sib.fastconf.EADock3: Minimizing binding mode 1951, energy is 634.3048, rmsd is 20.763494
sib.fastconf.EADock3: Minimizing binding mode 1952, energy is 634.8629, rmsd is 53.534027
sib.fastconf.EADock3: Minimizing binding mode 1953, energy is 635.05597, rmsd is 21.967402
sib.fastconf.EADock3: Minimizing binding mode 1954, energy is 635.0792, rmsd is 45.259758
sib.fastconf.EADock3: Minimizing binding mode 1955, energy is 635.3284, rmsd is 24.88751
sib.fastconf.EADock3: Minimizing binding mode 1956, energy is 635.60767, rmsd is 47.330208
sib.fastconf.EADock3: Minimizing binding mode 1957, energy is 635.682, rmsd is 27.622343
sib.fastconf.EADock3: Minimizing binding mode 1958, energy is 637.1067, rmsd is 34.71774
sib.fastconf.EADock3: Minimizing binding mode 1959, energy is 637.5914, rmsd is 20.60478
sib.fastconf.EADock3: Minimizing binding mode 1960, energy is 637.6251, rmsd is 39.457035
sib.fastconf.EADock3: Minimizing binding mode 1961, energy is 637.7064, rmsd is 37.42272
sib.fastconf.EADock3: Minimizing binding mode 1962, energy is 638.0309, rmsd is 51.365154
sib.fastconf.EADock3: Minimizing binding mode 1963, energy is 638.04285, rmsd is 24.076876
sib.fastconf.EADock3: Minimizing binding mode 1964, energy is 638.0552, rmsd is 3.2416654
sib.fastconf.EADock3: Minimizing binding mode 1965, energy is 638.683, rmsd is 19.726664
sib.fastconf.EADock3: Minimizing binding mode 1966, energy is 639.3479, rmsd is 60.594616
sib.fastconf.EADock3: Minimizing binding mode 1967, energy is 641.08765, rmsd is 26.054977
sib.fastconf.EADock3: Minimizing binding mode 1968, energy is 641.5068, rmsd is 2.062803
sib.fastconf.EADock3: Minimizing binding mode 1969, energy is 642.1572, rmsd is 21.270746
sib.fastconf.EADock3: Minimizing binding mode 1970, energy is 642.2611, rmsd is 45.456905
sib.fastconf.EADock3: Minimizing binding mode 1971, energy is 642.50916, rmsd is 24.758455
sib.fastconf.EADock3: Minimizing binding mode 1972, energy is 644.73724, rmsd is 22.536922
sib.fastconf.EADock3: Minimizing binding mode 1973, energy is 644.738, rmsd is 50.885155
sib.fastconf.EADock3: Minimizing binding mode 1974, energy is 645.0521, rmsd is 46.012287
sib.fastconf.EADock3: Minimizing binding mode 1975, energy is 645.49677, rmsd is 27.784918
sib.fastconf.EADock3: Minimizing binding mode 1976, energy is 645.8744, rmsd is 40.38578
sib.fastconf.EADock3: Minimizing binding mode 1977, energy is 646.39044, rmsd is 34.107292
sib.fastconf.EADock3: Minimizing binding mode 1978, energy is 646.671, rmsd is 21.904638
sib.fastconf.EADock3: Minimizing binding mode 1979, energy is 646.98035, rmsd is 22.397238
sib.fastconf.EADock3: Minimizing binding mode 1980, energy is 647.84143, rmsd is 54.46037
sib.fastconf.EADock3: Minimizing binding mode 1981, energy is 648.92847, rmsd is 43.26164
sib.fastconf.EADock3: Minimizing binding mode 1982, energy is 649.50586, rmsd is 49.061802
sib.fastconf.EADock3: Minimizing binding mode 1983, energy is 649.7343, rmsd is 45.530937
sib.fastconf.EADock3: Minimizing binding mode 1984, energy is 650.0738, rmsd is 30.395638
sib.fastconf.EADock3: Minimizing binding mode 1985, energy is 650.4105, rmsd is 28.580147
sib.fastconf.EADock3: Minimizing binding mode 1986, energy is 650.6058, rmsd is 35.73863
sib.fastconf.EADock3: Minimizing binding mode 1987, energy is 650.9383, rmsd is 40.212887
sib.fastconf.EADock3: Minimizing binding mode 1988, energy is 651.32367, rmsd is 63.95342
sib.fastconf.EADock3: Minimizing binding mode 1989, energy is 651.6325, rmsd is 44.514393
sib.fastconf.EADock3: Minimizing binding mode 1990, energy is 651.8564, rmsd is 53.343346
sib.fastconf.EADock3: Minimizing binding mode 1991, energy is 652.0561, rmsd is 29.332792
sib.fastconf.EADock3: Minimizing binding mode 1992, energy is 652.61774, rmsd is 39.81128
sib.fastconf.EADock3: Minimizing binding mode 1993, energy is 652.7044, rmsd is 23.80967
sib.fastconf.EADock3: Minimizing binding mode 1994, energy is 653.00555, rmsd is 38.590603
sib.fastconf.EADock3: Minimizing binding mode 1995, energy is 653.08105, rmsd is 1.8558633
sib.fastconf.EADock3: Minimizing binding mode 1996, energy is 654.03503, rmsd is 36.75354
sib.fastconf.EADock3: Minimizing binding mode 1997, energy is 654.1045, rmsd is 22.488361
sib.fastconf.EADock3: Minimizing binding mode 1998, energy is 654.68536, rmsd is 22.811453
sib.fastconf.EADock3: Minimizing binding mode 1999, energy is 655.2671, rmsd is 32.573124
sib.fastconf.EADock3: Minimizing binding mode 2000, energy is 655.4808, rmsd is 22.327429
sib.fastconf.EADock3: Minimizing binding mode 2001, energy is 656.125, rmsd is 48.424255
sib.fastconf.EADock3: Minimizing binding mode 2002, energy is 656.2898, rmsd is 50.301735
sib.fastconf.EADock3: Minimizing binding mode 2003, energy is 656.93256, rmsd is 25.895514
sib.fastconf.EADock3: Minimizing binding mode 2004, energy is 657.6423, rmsd is 26.470387
sib.fastconf.EADock3: Minimizing binding mode 2005, energy is 658.0599, rmsd is 28.142572
sib.fastconf.EADock3: Minimizing binding mode 2006, energy is 658.9733, rmsd is 41.70281
sib.fastconf.EADock3: Minimizing binding mode 2007, energy is 659.3516, rmsd is 24.105017
sib.fastconf.EADock3: Minimizing binding mode 2008, energy is 659.5364, rmsd is 54.476437
sib.fastconf.EADock3: Minimizing binding mode 2009, energy is 659.8311, rmsd is 25.05771
sib.fastconf.EADock3: Minimizing binding mode 2010, energy is 659.8526, rmsd is 2.859744
sib.fastconf.EADock3: Minimizing binding mode 2011, energy is 660.7024, rmsd is 31.682331
sib.fastconf.EADock3: Minimizing binding mode 2012, energy is 660.834, rmsd is 54.106133
sib.fastconf.EADock3: Minimizing binding mode 2013, energy is 661.81116, rmsd is 35.21276
sib.fastconf.EADock3: Minimizing binding mode 2014, energy is 661.8531, rmsd is 40.31975
sib.fastconf.EADock3: Minimizing binding mode 2015, energy is 662.1506, rmsd is 35.543537
sib.fastconf.EADock3: Minimizing binding mode 2016, energy is 662.4385, rmsd is 41.428513
sib.fastconf.EADock3: Minimizing binding mode 2017, energy is 662.9086, rmsd is 52.972427
sib.fastconf.EADock3: Minimizing binding mode 2018, energy is 663.6608, rmsd is 35.1984
sib.fastconf.EADock3: Minimizing binding mode 2019, energy is 663.91833, rmsd is 49.8837
sib.fastconf.EADock3: Minimizing binding mode 2020, energy is 664.2497, rmsd is 24.632757
sib.fastconf.EADock3: Minimizing binding mode 2021, energy is 664.2921, rmsd is 28.023993
sib.fastconf.EADock3: Minimizing binding mode 2022, energy is 664.5792, rmsd is 49.520775
sib.fastconf.EADock3: Minimizing binding mode 2023, energy is 664.96844, rmsd is 23.022459
sib.fastconf.EADock3: Minimizing binding mode 2024, energy is 665.1633, rmsd is 43.2629
sib.fastconf.EADock3: Minimizing binding mode 2025, energy is 665.78894, rmsd is 3.2493072
sib.fastconf.EADock3: Minimizing binding mode 2026, energy is 666.38477, rmsd is 37.135803
sib.fastconf.EADock3: Minimizing binding mode 2027, energy is 667.4659, rmsd is 21.643507
sib.fastconf.EADock3: Minimizing binding mode 2028, energy is 667.6812, rmsd is 44.07195
sib.fastconf.EADock3: Minimizing binding mode 2029, energy is 667.96576, rmsd is 50.26504
sib.fastconf.EADock3: Minimizing binding mode 2030, energy is 668.1503, rmsd is 49.43414
sib.fastconf.EADock3: Minimizing binding mode 2031, energy is 668.273, rmsd is 22.135983
sib.fastconf.EADock3: Minimizing binding mode 2032, energy is 668.5223, rmsd is 3.3946817
sib.fastconf.EADock3: Minimizing binding mode 2033, energy is 668.6165, rmsd is 2.3431463
sib.fastconf.EADock3: Minimizing binding mode 2034, energy is 668.69196, rmsd is 39.99113
sib.fastconf.EADock3: Minimizing binding mode 2035, energy is 668.7142, rmsd is 28.38224
sib.fastconf.EADock3: Minimizing binding mode 2036, energy is 668.7773, rmsd is 3.0973365
sib.fastconf.EADock3: Minimizing binding mode 2037, energy is 669.0911, rmsd is 40.565384
sib.fastconf.EADock3: Minimizing binding mode 2038, energy is 669.1052, rmsd is 3.170767
sib.fastconf.EADock3: Minimizing binding mode 2039, energy is 669.28754, rmsd is 52.93475
sib.fastconf.EADock3: Minimizing binding mode 2040, energy is 669.30786, rmsd is 22.717957
sib.fastconf.EADock3: Minimizing binding mode 2041, energy is 669.4902, rmsd is 37.14917
sib.fastconf.EADock3: Minimizing binding mode 2042, energy is 669.5414, rmsd is 53.228542
sib.fastconf.EADock3: Minimizing binding mode 2043, energy is 669.72687, rmsd is 37.55458
sib.fastconf.EADock3: Minimizing binding mode 2044, energy is 669.86505, rmsd is 52.247223
sib.fastconf.EADock3: Minimizing binding mode 2045, energy is 670.1535, rmsd is 28.07848
sib.fastconf.EADock3: Minimizing binding mode 2046, energy is 670.45355, rmsd is 48.638306
sib.fastconf.EADock3: Minimizing binding mode 2047, energy is 670.6647, rmsd is 1.4939704
sib.fastconf.EADock3: Minimizing binding mode 2048, energy is 670.914, rmsd is 21.446953
sib.fastconf.EADock3: Minimizing binding mode 2049, energy is 671.01355, rmsd is 23.581877
sib.fastconf.EADock3: Minimizing binding mode 2050, energy is 671.5408, rmsd is 29.756445
sib.fastconf.EADock3: Minimizing binding mode 2051, energy is 671.8381, rmsd is 53.527756
sib.fastconf.EADock3: Minimizing binding mode 2052, energy is 671.85376, rmsd is 29.269787
sib.fastconf.EADock3: Minimizing binding mode 2053, energy is 671.9609, rmsd is 27.070835
sib.fastconf.EADock3: Minimizing binding mode 2054, energy is 672.21875, rmsd is 34.436764
sib.fastconf.EADock3: Minimizing binding mode 2055, energy is 672.5153, rmsd is 22.68933
sib.fastconf.EADock3: Minimizing binding mode 2056, energy is 672.6801, rmsd is 48.095226
sib.fastconf.EADock3: Minimizing binding mode 2057, energy is 672.7322, rmsd is 21.653175
sib.fastconf.EADock3: Minimizing binding mode 2058, energy is 672.75714, rmsd is 44.258694
sib.fastconf.EADock3: Minimizing binding mode 2059, energy is 672.78754, rmsd is 20.770697
sib.fastconf.EADock3: Minimizing binding mode 2060, energy is 672.90094, rmsd is 52.078754
sib.fastconf.EADock3: Minimizing binding mode 2061, energy is 673.0274, rmsd is 21.993763
sib.fastconf.EADock3: Minimizing binding mode 2062, energy is 673.4517, rmsd is 42.910748
sib.fastconf.EADock3: Minimizing binding mode 2063, energy is 673.9156, rmsd is 33.955185
sib.fastconf.EADock3: Minimizing binding mode 2064, energy is 673.99115, rmsd is 35.63084
sib.fastconf.EADock3: Minimizing binding mode 2065, energy is 675.8752, rmsd is 48.41305
sib.fastconf.EADock3: Minimizing binding mode 2066, energy is 676.23303, rmsd is 34.983173
sib.fastconf.EADock3: Minimizing binding mode 2067, energy is 677.4194, rmsd is 2.908057
sib.fastconf.EADock3: Minimizing binding mode 2068, energy is 678.28534, rmsd is 2.214791
sib.fastconf.EADock3: Minimizing binding mode 2069, energy is 678.52405, rmsd is 3.4627054
sib.fastconf.EADock3: Minimizing binding mode 2070, energy is 679.13165, rmsd is 29.264553
sib.fastconf.EADock3: Minimizing binding mode 2071, energy is 679.88354, rmsd is 23.101751
sib.fastconf.EADock3: Minimizing binding mode 2072, energy is 680.3216, rmsd is 26.988802
sib.fastconf.EADock3: Minimizing binding mode 2073, energy is 680.60114, rmsd is 50.427975
sib.fastconf.EADock3: Minimizing binding mode 2074, energy is 680.72424, rmsd is 22.891268
sib.fastconf.EADock3: Minimizing binding mode 2075, energy is 681.0482, rmsd is 32.26197
sib.fastconf.EADock3: Minimizing binding mode 2076, energy is 681.1542, rmsd is 41.2995
sib.fastconf.EADock3: Minimizing binding mode 2077, energy is 681.2467, rmsd is 28.55773
sib.fastconf.EADock3: Minimizing binding mode 2078, energy is 681.5944, rmsd is 51.988564
sib.fastconf.EADock3: Minimizing binding mode 2079, energy is 682.8464, rmsd is 35.747837
sib.fastconf.EADock3: Minimizing binding mode 2080, energy is 682.8655, rmsd is 23.876604
sib.fastconf.EADock3: Minimizing binding mode 2081, energy is 683.6097, rmsd is 23.110188
sib.fastconf.EADock3: Minimizing binding mode 2082, energy is 684.0065, rmsd is 29.698753
sib.fastconf.EADock3: Minimizing binding mode 2083, energy is 684.79913, rmsd is 28.276896
sib.fastconf.EADock3: Minimizing binding mode 2084, energy is 684.9194, rmsd is 29.169315
sib.fastconf.EADock3: Minimizing binding mode 2085, energy is 684.9714, rmsd is 47.211254
sib.fastconf.EADock3: Minimizing binding mode 2086, energy is 685.7778, rmsd is 44.056732
sib.fastconf.EADock3: Minimizing binding mode 2087, energy is 685.91785, rmsd is 27.3414
sib.fastconf.EADock3: Minimizing binding mode 2088, energy is 686.5574, rmsd is 43.392788
sib.fastconf.EADock3: Minimizing binding mode 2089, energy is 686.6183, rmsd is 52.32082
sib.fastconf.EADock3: Minimizing binding mode 2090, energy is 688.2903, rmsd is 28.161306
sib.fastconf.EADock3: Minimizing binding mode 2091, energy is 688.55444, rmsd is 37.93395
sib.fastconf.EADock3: Minimizing binding mode 2092, energy is 688.8652, rmsd is 21.081902
sib.fastconf.EADock3: Minimizing binding mode 2093, energy is 689.08167, rmsd is 22.982538
sib.fastconf.EADock3: Minimizing binding mode 2094, energy is 689.14014, rmsd is 53.79934
sib.fastconf.EADock3: Minimizing binding mode 2095, energy is 689.28595, rmsd is 52.050232
sib.fastconf.EADock3: Minimizing binding mode 2096, energy is 690.3894, rmsd is 44.43963
sib.fastconf.EADock3: Minimizing binding mode 2097, energy is 690.6965, rmsd is 27.570034
sib.fastconf.EADock3: Minimizing binding mode 2098, energy is 691.1713, rmsd is 21.22872
sib.fastconf.EADock3: Minimizing binding mode 2099, energy is 691.49335, rmsd is 23.566416
sib.fastconf.EADock3: Minimizing binding mode 2100, energy is 692.68256, rmsd is 51.006214
sib.fastconf.EADock3: Minimizing binding mode 2101, energy is 692.8202, rmsd is 24.498066
sib.fastconf.EADock3: Minimizing binding mode 2102, energy is 693.301, rmsd is 31.299658
sib.fastconf.EADock3: Minimizing binding mode 2103, energy is 694.0121, rmsd is 27.484365
sib.fastconf.EADock3: Minimizing binding mode 2104, energy is 694.5866, rmsd is 49.226967
sib.fastconf.EADock3: Minimizing binding mode 2105, energy is 694.8188, rmsd is 29.976265
sib.fastconf.EADock3: Minimizing binding mode 2106, energy is 695.51733, rmsd is 21.240797
sib.fastconf.EADock3: Minimizing binding mode 2107, energy is 695.52783, rmsd is 54.50541
sib.fastconf.EADock3: Minimizing binding mode 2108, energy is 695.94385, rmsd is 34.949024
sib.fastconf.EADock3: Minimizing binding mode 2109, energy is 696.5197, rmsd is 37.568676
sib.fastconf.EADock3: Minimizing binding mode 2110, energy is 696.9496, rmsd is 28.178555
sib.fastconf.EADock3: Minimizing binding mode 2111, energy is 697.1674, rmsd is 45.591923
sib.fastconf.EADock3: Minimizing binding mode 2112, energy is 697.3558, rmsd is 46.040936
sib.fastconf.EADock3: Minimizing binding mode 2113, energy is 697.62616, rmsd is 45.94388
sib.fastconf.EADock3: Minimizing binding mode 2114, energy is 697.6683, rmsd is 21.632845
sib.fastconf.EADock3: Minimizing binding mode 2115, energy is 697.8923, rmsd is 42.721405
sib.fastconf.EADock3: Minimizing binding mode 2116, energy is 698.7513, rmsd is 21.172625
sib.fastconf.EADock3: Minimizing binding mode 2117, energy is 698.8657, rmsd is 42.06783
sib.fastconf.EADock3: Minimizing binding mode 2118, energy is 698.9288, rmsd is 22.795156
sib.fastconf.EADock3: Minimizing binding mode 2119, energy is 699.0875, rmsd is 51.209194
sib.fastconf.EADock3: Minimizing binding mode 2120, energy is 699.3569, rmsd is 49.685703
sib.fastconf.EADock3: Minimizing binding mode 2121, energy is 699.8382, rmsd is 53.550346
sib.fastconf.EADock3: Minimizing binding mode 2122, energy is 699.90686, rmsd is 49.865856
sib.fastconf.EADock3: Minimizing binding mode 2123, energy is 700.0605, rmsd is 52.3313
sib.fastconf.EADock3: Minimizing binding mode 2124, energy is 701.3039, rmsd is 29.141806
sib.fastconf.EADock3: Minimizing binding mode 2125, energy is 701.3899, rmsd is 34.76846
sib.fastconf.EADock3: Minimizing binding mode 2126, energy is 701.9431, rmsd is 2.6622605
sib.fastconf.EADock3: Minimizing binding mode 2127, energy is 702.3213, rmsd is 22.239485
sib.fastconf.EADock3: Minimizing binding mode 2128, energy is 702.33453, rmsd is 43.20339
sib.fastconf.EADock3: Minimizing binding mode 2129, energy is 702.91864, rmsd is 35.810246
sib.fastconf.EADock3: Minimizing binding mode 2130, energy is 703.237, rmsd is 51.889572
sib.fastconf.EADock3: Minimizing binding mode 2131, energy is 703.46796, rmsd is 53.830963
sib.fastconf.EADock3: Minimizing binding mode 2132, energy is 703.7111, rmsd is 40.526382
sib.fastconf.EADock3: Minimizing binding mode 2133, energy is 704.3796, rmsd is 19.185102
sib.fastconf.EADock3: Minimizing binding mode 2134, energy is 704.427, rmsd is 50.966694
sib.fastconf.EADock3: Minimizing binding mode 2135, energy is 704.7882, rmsd is 32.574104
sib.fastconf.EADock3: Minimizing binding mode 2136, energy is 704.99023, rmsd is 38.76327
sib.fastconf.EADock3: Minimizing binding mode 2137, energy is 705.335, rmsd is 20.962708
sib.fastconf.EADock3: Minimizing binding mode 2138, energy is 705.83936, rmsd is 23.623804
sib.fastconf.EADock3: Minimizing binding mode 2139, energy is 706.108, rmsd is 43.957756
sib.fastconf.EADock3: Minimizing binding mode 2140, energy is 706.2634, rmsd is 27.608793
sib.fastconf.EADock3: Minimizing binding mode 2141, energy is 706.50366, rmsd is 46.196342
sib.fastconf.EADock3: Minimizing binding mode 2142, energy is 707.2401, rmsd is 22.663425
sib.fastconf.EADock3: Minimizing binding mode 2143, energy is 707.5932, rmsd is 36.74834
sib.fastconf.EADock3: Minimizing binding mode 2144, energy is 708.04395, rmsd is 1.7567332
sib.fastconf.EADock3: Minimizing binding mode 2145, energy is 708.1699, rmsd is 39.53164
sib.fastconf.EADock3: Minimizing binding mode 2146, energy is 708.1932, rmsd is 37.212296
sib.fastconf.EADock3: Minimizing binding mode 2147, energy is 709.12036, rmsd is 27.919632
sib.fastconf.EADock3: Minimizing binding mode 2148, energy is 709.16876, rmsd is 43.681404
sib.fastconf.EADock3: Minimizing binding mode 2149, energy is 709.4055, rmsd is 24.167223
sib.fastconf.EADock3: Minimizing binding mode 2150, energy is 709.9047, rmsd is 39.368732
sib.fastconf.EADock3: Minimizing binding mode 2151, energy is 710.4434, rmsd is 52.021076
sib.fastconf.EADock3: Minimizing binding mode 2152, energy is 710.6111, rmsd is 36.01925
sib.fastconf.EADock3: Minimizing binding mode 2153, energy is 710.6254, rmsd is 50.356293
sib.fastconf.EADock3: Minimizing binding mode 2154, energy is 712.21106, rmsd is 51.586586
sib.fastconf.EADock3: Minimizing binding mode 2155, energy is 712.2518, rmsd is 27.5663
sib.fastconf.EADock3: Minimizing binding mode 2156, energy is 712.36255, rmsd is 3.199494
sib.fastconf.EADock3: Minimizing binding mode 2157, energy is 712.3832, rmsd is 21.894348
sib.fastconf.EADock3: Minimizing binding mode 2158, energy is 712.8876, rmsd is 20.970304
sib.fastconf.EADock3: Minimizing binding mode 2159, energy is 714.37366, rmsd is 52.17627
sib.fastconf.EADock3: Minimizing binding mode 2160, energy is 714.5972, rmsd is 43.055668
sib.fastconf.EADock3: Minimizing binding mode 2161, energy is 717.0457, rmsd is 2.415167
sib.fastconf.EADock3: Minimizing binding mode 2162, energy is 717.70044, rmsd is 27.018124
sib.fastconf.EADock3: Minimizing binding mode 2163, energy is 718.1643, rmsd is 3.7675233
sib.fastconf.EADock3: Minimizing binding mode 2164, energy is 718.1954, rmsd is 35.841885
sib.fastconf.EADock3: Minimizing binding mode 2165, energy is 719.18884, rmsd is 28.7953
sib.fastconf.EADock3: Minimizing binding mode 2166, energy is 719.21967, rmsd is 37.927856
sib.fastconf.EADock3: Minimizing binding mode 2167, energy is 719.7386, rmsd is 22.898638
sib.fastconf.EADock3: Minimizing binding mode 2168, energy is 719.751, rmsd is 24.652033
sib.fastconf.EADock3: Minimizing binding mode 2169, energy is 720.6439, rmsd is 35.35767
sib.fastconf.EADock3: Minimizing binding mode 2170, energy is 720.7552, rmsd is 29.51941
sib.fastconf.EADock3: Minimizing binding mode 2171, energy is 720.9614, rmsd is 49.650745
sib.fastconf.EADock3: Minimizing binding mode 2172, energy is 721.6577, rmsd is 2.2197008
sib.fastconf.EADock3: Minimizing binding mode 2173, energy is 721.667, rmsd is 1.8642665
sib.fastconf.EADock3: Minimizing binding mode 2174, energy is 722.3929, rmsd is 43.393753
sib.fastconf.EADock3: Minimizing binding mode 2175, energy is 722.63806, rmsd is 38.053547
sib.fastconf.EADock3: Minimizing binding mode 2176, energy is 722.68445, rmsd is 45.18331
sib.fastconf.EADock3: Minimizing binding mode 2177, energy is 722.90063, rmsd is 22.792091
sib.fastconf.EADock3: Minimizing binding mode 2178, energy is 722.9563, rmsd is 50.937714
sib.fastconf.EADock3: Minimizing binding mode 2179, energy is 723.5829, rmsd is 26.157722
sib.fastconf.EADock3: Minimizing binding mode 2180, energy is 724.75385, rmsd is 22.080587
sib.fastconf.EADock3: Minimizing binding mode 2181, energy is 724.9333, rmsd is 31.570942
sib.fastconf.EADock3: Minimizing binding mode 2182, energy is 725.38904, rmsd is 53.913773
sib.fastconf.EADock3: Minimizing binding mode 2183, energy is 726.0111, rmsd is 21.702866
sib.fastconf.EADock3: Minimizing binding mode 2184, energy is 726.48486, rmsd is 49.64493
sib.fastconf.EADock3: Minimizing binding mode 2185, energy is 726.7414, rmsd is 26.998474
sib.fastconf.EADock3: Minimizing binding mode 2186, energy is 726.79663, rmsd is 20.16064
sib.fastconf.EADock3: Minimizing binding mode 2187, energy is 727.10254, rmsd is 38.682487
sib.fastconf.EADock3: Minimizing binding mode 2188, energy is 728.65326, rmsd is 38.817284
sib.fastconf.EADock3: Minimizing binding mode 2189, energy is 728.7223, rmsd is 42.179134
sib.fastconf.EADock3: Minimizing binding mode 2190, energy is 729.1618, rmsd is 35.113617
sib.fastconf.EADock3: Minimizing binding mode 2191, energy is 730.0081, rmsd is 3.744024
sib.fastconf.EADock3: Minimizing binding mode 2192, energy is 730.5636, rmsd is 34.091587
sib.fastconf.EADock3: Minimizing binding mode 2193, energy is 730.768, rmsd is 26.614212
sib.fastconf.EADock3: Minimizing binding mode 2194, energy is 730.8466, rmsd is 24.39275
sib.fastconf.EADock3: Minimizing binding mode 2195, energy is 731.1726, rmsd is 49.535057
sib.fastconf.EADock3: Minimizing binding mode 2196, energy is 731.84094, rmsd is 24.55532
sib.fastconf.EADock3: Minimizing binding mode 2197, energy is 731.8631, rmsd is 29.287949
sib.fastconf.EADock3: Minimizing binding mode 2198, energy is 732.2452, rmsd is 20.635017
sib.fastconf.EADock3: Minimizing binding mode 2199, energy is 732.4387, rmsd is 20.78579
sib.fastconf.EADock3: Minimizing binding mode 2200, energy is 732.50867, rmsd is 21.883533
sib.fastconf.EADock3: Minimizing binding mode 2201, energy is 732.94495, rmsd is 37.952145
sib.fastconf.EADock3: Minimizing binding mode 2202, energy is 733.0532, rmsd is 37.242016
sib.fastconf.EADock3: Minimizing binding mode 2203, energy is 733.0721, rmsd is 37.914265
sib.fastconf.EADock3: Minimizing binding mode 2204, energy is 733.90784, rmsd is 23.448004
sib.fastconf.EADock3: Minimizing binding mode 2205, energy is 733.9364, rmsd is 37.652725
sib.fastconf.EADock3: Minimizing binding mode 2206, energy is 734.0408, rmsd is 21.811283
sib.fastconf.EADock3: Minimizing binding mode 2207, energy is 736.17834, rmsd is 47.828606
sib.fastconf.EADock3: Minimizing binding mode 2208, energy is 736.2847, rmsd is 24.423098
sib.fastconf.EADock3: Minimizing binding mode 2209, energy is 736.4949, rmsd is 27.226963
sib.fastconf.EADock3: Minimizing binding mode 2210, energy is 736.6459, rmsd is 31.092695
sib.fastconf.EADock3: Minimizing binding mode 2211, energy is 737.2023, rmsd is 42.026226
sib.fastconf.EADock3: Minimizing binding mode 2212, energy is 737.2202, rmsd is 37.4736
sib.fastconf.EADock3: Minimizing binding mode 2213, energy is 738.0634, rmsd is 23.911303
sib.fastconf.EADock3: Minimizing binding mode 2214, energy is 738.2131, rmsd is 45.368813
sib.fastconf.EADock3: Minimizing binding mode 2215, energy is 739.1029, rmsd is 23.264452
sib.fastconf.EADock3: Minimizing binding mode 2216, energy is 739.66364, rmsd is 21.53096
sib.fastconf.EADock3: Minimizing binding mode 2217, energy is 740.4459, rmsd is 3.200671
sib.fastconf.EADock3: Minimizing binding mode 2218, energy is 740.727, rmsd is 23.218414
sib.fastconf.EADock3: Minimizing binding mode 2219, energy is 740.9243, rmsd is 20.023737
sib.fastconf.EADock3: Minimizing binding mode 2220, energy is 741.46716, rmsd is 23.856752
sib.fastconf.EADock3: Minimizing binding mode 2221, energy is 742.0794, rmsd is 23.771402
sib.fastconf.EADock3: Minimizing binding mode 2222, energy is 742.228, rmsd is 37.403774
sib.fastconf.EADock3: Minimizing binding mode 2223, energy is 742.50714, rmsd is 39.777416
sib.fastconf.EADock3: Minimizing binding mode 2224, energy is 742.74115, rmsd is 36.258144
sib.fastconf.EADock3: Minimizing binding mode 2225, energy is 742.9225, rmsd is 27.330399
sib.fastconf.EADock3: Minimizing binding mode 2226, energy is 743.50964, rmsd is 36.686317
sib.fastconf.EADock3: Minimizing binding mode 2227, energy is 744.3096, rmsd is 2.0394962
sib.fastconf.EADock3: Minimizing binding mode 2228, energy is 744.86816, rmsd is 37.931602
sib.fastconf.EADock3: Minimizing binding mode 2229, energy is 745.2004, rmsd is 37.782078
sib.fastconf.EADock3: Minimizing binding mode 2230, energy is 745.268, rmsd is 35.655266
sib.fastconf.EADock3: Minimizing binding mode 2231, energy is 745.4119, rmsd is 49.228306
sib.fastconf.EADock3: Minimizing binding mode 2232, energy is 745.8208, rmsd is 39.754795
sib.fastconf.EADock3: Minimizing binding mode 2233, energy is 746.3851, rmsd is 27.93646
sib.fastconf.EADock3: Minimizing binding mode 2234, energy is 746.9151, rmsd is 27.364515
sib.fastconf.EADock3: Minimizing binding mode 2235, energy is 747.3093, rmsd is 54.35615
sib.fastconf.EADock3: Minimizing binding mode 2236, energy is 748.16284, rmsd is 26.924911
sib.fastconf.EADock3: Minimizing binding mode 2237, energy is 748.2245, rmsd is 40.792
sib.fastconf.EADock3: Minimizing binding mode 2238, energy is 748.96484, rmsd is 47.11795
sib.fastconf.EADock3: Minimizing binding mode 2239, energy is 749.0411, rmsd is 27.41573
sib.fastconf.EADock3: Minimizing binding mode 2240, energy is 749.0507, rmsd is 48.01359
sib.fastconf.EADock3: Minimizing binding mode 2241, energy is 750.1021, rmsd is 2.7013903
sib.fastconf.EADock3: Minimizing binding mode 2242, energy is 751.7459, rmsd is 19.698952
sib.fastconf.EADock3: Minimizing binding mode 2243, energy is 752.2655, rmsd is 21.091541
sib.fastconf.EADock3: Minimizing binding mode 2244, energy is 752.4961, rmsd is 35.680885
sib.fastconf.EADock3: Minimizing binding mode 2245, energy is 752.72626, rmsd is 37.049183
sib.fastconf.EADock3: Minimizing binding mode 2246, energy is 753.0613, rmsd is 39.16131
sib.fastconf.EADock3: Minimizing binding mode 2247, energy is 753.3256, rmsd is 25.136063
sib.fastconf.EADock3: Minimizing binding mode 2248, energy is 753.5702, rmsd is 59.757206
sib.fastconf.EADock3: Minimizing binding mode 2249, energy is 753.803, rmsd is 38.884655
sib.fastconf.EADock3: Minimizing binding mode 2250, energy is 753.86633, rmsd is 38.35766
sib.fastconf.EADock3: Minimizing binding mode 2251, energy is 754.19196, rmsd is 42.82779
sib.fastconf.EADock3: Minimizing binding mode 2252, energy is 754.68964, rmsd is 28.574171
sib.fastconf.EADock3: Minimizing binding mode 2253, energy is 754.79254, rmsd is 20.186583
sib.fastconf.EADock3: Minimizing binding mode 2254, energy is 755.0752, rmsd is 44.601337
sib.fastconf.EADock3: Minimizing binding mode 2255, energy is 755.389, rmsd is 50.04336
sib.fastconf.EADock3: Minimizing binding mode 2256, energy is 755.4431, rmsd is 45.927837
sib.fastconf.EADock3: Minimizing binding mode 2257, energy is 755.4755, rmsd is 51.3946
sib.fastconf.EADock3: Minimizing binding mode 2258, energy is 755.5262, rmsd is 21.838432
sib.fastconf.EADock3: Minimizing binding mode 2259, energy is 756.2684, rmsd is 27.089869
sib.fastconf.EADock3: Minimizing binding mode 2260, energy is 757.04126, rmsd is 23.106634
sib.fastconf.EADock3: Minimizing binding mode 2261, energy is 757.8276, rmsd is 26.226126
sib.fastconf.EADock3: Minimizing binding mode 2262, energy is 757.8507, rmsd is 22.290804
sib.fastconf.EADock3: Minimizing binding mode 2263, energy is 758.0084, rmsd is 44.728947
sib.fastconf.EADock3: Minimizing binding mode 2264, energy is 759.24756, rmsd is 21.03832
sib.fastconf.EADock3: Minimizing binding mode 2265, energy is 759.55963, rmsd is 43.136356
sib.fastconf.EADock3: Minimizing binding mode 2266, energy is 759.6522, rmsd is 37.664948
sib.fastconf.EADock3: Minimizing binding mode 2267, energy is 760.2183, rmsd is 22.842823
sib.fastconf.EADock3: Minimizing binding mode 2268, energy is 761.3883, rmsd is 21.662928
sib.fastconf.EADock3: Minimizing binding mode 2269, energy is 761.8694, rmsd is 1.9421489
sib.fastconf.EADock3: Minimizing binding mode 2270, energy is 762.3412, rmsd is 20.223717
sib.fastconf.EADock3: Minimizing binding mode 2271, energy is 762.4625, rmsd is 35.859604
sib.fastconf.EADock3: Minimizing binding mode 2272, energy is 762.6764, rmsd is 24.481625
sib.fastconf.EADock3: Minimizing binding mode 2273, energy is 763.2021, rmsd is 39.804707
sib.fastconf.EADock3: Minimizing binding mode 2274, energy is 763.7595, rmsd is 21.994865
sib.fastconf.EADock3: Minimizing binding mode 2275, energy is 763.7652, rmsd is 54.171406
sib.fastconf.EADock3: Minimizing binding mode 2276, energy is 763.78766, rmsd is 50.483795
sib.fastconf.EADock3: Minimizing binding mode 2277, energy is 763.8187, rmsd is 22.860235
sib.fastconf.EADock3: Minimizing binding mode 2278, energy is 765.8093, rmsd is 22.921412
sib.fastconf.EADock3: Minimizing binding mode 2279, energy is 765.8669, rmsd is 34.39108
sib.fastconf.EADock3: Minimizing binding mode 2280, energy is 765.8886, rmsd is 43.247543
sib.fastconf.EADock3: Minimizing binding mode 2281, energy is 766.0149, rmsd is 2.2480624
sib.fastconf.EADock3: Minimizing binding mode 2282, energy is 767.3219, rmsd is 20.263538
sib.fastconf.EADock3: Minimizing binding mode 2283, energy is 767.4191, rmsd is 52.891712
sib.fastconf.EADock3: Minimizing binding mode 2284, energy is 767.5597, rmsd is 36.02079
sib.fastconf.EADock3: Minimizing binding mode 2285, energy is 767.5658, rmsd is 51.40851
sib.fastconf.EADock3: Minimizing binding mode 2286, energy is 767.6, rmsd is 37.416096
sib.fastconf.EADock3: Minimizing binding mode 2287, energy is 768.0136, rmsd is 30.454752
sib.fastconf.EADock3: Minimizing binding mode 2288, energy is 769.0293, rmsd is 42.36741
sib.fastconf.EADock3: Minimizing binding mode 2289, energy is 769.6537, rmsd is 27.084724
sib.fastconf.EADock3: Minimizing binding mode 2290, energy is 770.26056, rmsd is 26.138142
sib.fastconf.EADock3: Minimizing binding mode 2291, energy is 771.7297, rmsd is 53.006447
sib.fastconf.EADock3: Minimizing binding mode 2292, energy is 772.2338, rmsd is 21.35393
sib.fastconf.EADock3: Minimizing binding mode 2293, energy is 772.5027, rmsd is 52.911606
sib.fastconf.EADock3: Minimizing binding mode 2294, energy is 772.5245, rmsd is 21.777655
sib.fastconf.EADock3: Minimizing binding mode 2295, energy is 772.575, rmsd is 41.937195
sib.fastconf.EADock3: Minimizing binding mode 2296, energy is 772.58307, rmsd is 50.34648
sib.fastconf.EADock3: Minimizing binding mode 2297, energy is 773.23834, rmsd is 43.537437
sib.fastconf.EADock3: Minimizing binding mode 2298, energy is 773.95764, rmsd is 26.117432
sib.fastconf.EADock3: Minimizing binding mode 2299, energy is 774.43976, rmsd is 32.29167
sib.fastconf.EADock3: Minimizing binding mode 2300, energy is 774.5598, rmsd is 53.26154
sib.fastconf.EADock3: Minimizing binding mode 2301, energy is 774.87787, rmsd is 2.6496584
sib.fastconf.EADock3: Minimizing binding mode 2302, energy is 775.21313, rmsd is 22.743069
sib.fastconf.EADock3: Minimizing binding mode 2303, energy is 775.4652, rmsd is 22.24354
sib.fastconf.EADock3: Minimizing binding mode 2304, energy is 775.72504, rmsd is 42.64032
sib.fastconf.EADock3: Minimizing binding mode 2305, energy is 776.072, rmsd is 24.031776
sib.fastconf.EADock3: Minimizing binding mode 2306, energy is 776.6417, rmsd is 50.28848
sib.fastconf.EADock3: Minimizing binding mode 2307, energy is 777.43365, rmsd is 36.3127
sib.fastconf.EADock3: Minimizing binding mode 2308, energy is 777.6916, rmsd is 54.019024
sib.fastconf.EADock3: Minimizing binding mode 2309, energy is 778.6415, rmsd is 2.9350736
sib.fastconf.EADock3: Minimizing binding mode 2310, energy is 779.1054, rmsd is 23.329535
sib.fastconf.EADock3: Minimizing binding mode 2311, energy is 779.27466, rmsd is 40.446365
sib.fastconf.EADock3: Minimizing binding mode 2312, energy is 780.0046, rmsd is 43.928642
sib.fastconf.EADock3: Minimizing binding mode 2313, energy is 780.32526, rmsd is 37.209442
sib.fastconf.EADock3: Minimizing binding mode 2314, energy is 781.08435, rmsd is 24.683388
sib.fastconf.EADock3: Minimizing binding mode 2315, energy is 781.302, rmsd is 47.633804
sib.fastconf.EADock3: Minimizing binding mode 2316, energy is 781.7414, rmsd is 21.74658
sib.fastconf.EADock3: Minimizing binding mode 2317, energy is 781.8337, rmsd is 24.107048
sib.fastconf.EADock3: Minimizing binding mode 2318, energy is 782.02264, rmsd is 21.884182
sib.fastconf.EADock3: Minimizing binding mode 2319, energy is 782.5177, rmsd is 24.604856
sib.fastconf.EADock3: Minimizing binding mode 2320, energy is 782.7689, rmsd is 49.02356
sib.fastconf.EADock3: Minimizing binding mode 2321, energy is 782.8314, rmsd is 51.82798
sib.fastconf.EADock3: Minimizing binding mode 2322, energy is 782.8571, rmsd is 25.46487
sib.fastconf.EADock3: Minimizing binding mode 2323, energy is 784.4679, rmsd is 37.70429
sib.fastconf.EADock3: Minimizing binding mode 2324, energy is 784.97784, rmsd is 3.0326402
sib.fastconf.EADock3: Minimizing binding mode 2325, energy is 785.0466, rmsd is 34.936546
sib.fastconf.EADock3: Minimizing binding mode 2326, energy is 785.27795, rmsd is 51.264114
sib.fastconf.EADock3: Minimizing binding mode 2327, energy is 785.32733, rmsd is 51.7241
sib.fastconf.EADock3: Minimizing binding mode 2328, energy is 785.45526, rmsd is 2.9607735
sib.fastconf.EADock3: Minimizing binding mode 2329, energy is 786.16644, rmsd is 3.703865
sib.fastconf.EADock3: Minimizing binding mode 2330, energy is 786.28186, rmsd is 39.818653
sib.fastconf.EADock3: Minimizing binding mode 2331, energy is 786.3438, rmsd is 26.973505
sib.fastconf.EADock3: Minimizing binding mode 2332, energy is 787.4497, rmsd is 35.418404
sib.fastconf.EADock3: Minimizing binding mode 2333, energy is 787.9223, rmsd is 53.955173
sib.fastconf.EADock3: Minimizing binding mode 2334, energy is 788.6143, rmsd is 56.54556
sib.fastconf.EADock3: Minimizing binding mode 2335, energy is 789.1383, rmsd is 21.755562
sib.fastconf.EADock3: Minimizing binding mode 2336, energy is 789.39325, rmsd is 53.279984
sib.fastconf.EADock3: Minimizing binding mode 2337, energy is 789.52466, rmsd is 20.966476
sib.fastconf.EADock3: Minimizing binding mode 2338, energy is 790.129, rmsd is 24.90337
sib.fastconf.EADock3: Minimizing binding mode 2339, energy is 791.32367, rmsd is 27.039997
sib.fastconf.EADock3: Minimizing binding mode 2340, energy is 792.3191, rmsd is 2.2366054
sib.fastconf.EADock3: Minimizing binding mode 2341, energy is 792.9522, rmsd is 47.816193
sib.fastconf.EADock3: Minimizing binding mode 2342, energy is 794.9008, rmsd is 36.924385
sib.fastconf.EADock3: Minimizing binding mode 2343, energy is 795.15405, rmsd is 19.64787
sib.fastconf.EADock3: Minimizing binding mode 2344, energy is 796.0845, rmsd is 54.332916
sib.fastconf.EADock3: Minimizing binding mode 2345, energy is 796.12225, rmsd is 38.54152
sib.fastconf.EADock3: Minimizing binding mode 2346, energy is 796.46497, rmsd is 42.30319
sib.fastconf.EADock3: Minimizing binding mode 2347, energy is 797.38214, rmsd is 35.03851
sib.fastconf.EADock3: Minimizing binding mode 2348, energy is 797.3964, rmsd is 35.836544
sib.fastconf.EADock3: Minimizing binding mode 2349, energy is 797.43896, rmsd is 49.127213
sib.fastconf.EADock3: Minimizing binding mode 2350, energy is 797.84973, rmsd is 22.787146
sib.fastconf.EADock3: Minimizing binding mode 2351, energy is 798.5884, rmsd is 22.88996
sib.fastconf.EADock3: Minimizing binding mode 2352, energy is 799.76697, rmsd is 38.585007
sib.fastconf.EADock3: Minimizing binding mode 2353, energy is 800.4028, rmsd is 21.128906
sib.fastconf.EADock3: Minimizing binding mode 2354, energy is 800.5227, rmsd is 42.268673
sib.fastconf.EADock3: Minimizing binding mode 2355, energy is 801.5702, rmsd is 20.659061
sib.fastconf.EADock3: Minimizing binding mode 2356, energy is 801.6288, rmsd is 48.41781
sib.fastconf.EADock3: Minimizing binding mode 2357, energy is 801.9751, rmsd is 48.673157
sib.fastconf.EADock3: Minimizing binding mode 2358, energy is 802.34247, rmsd is 49.475895
sib.fastconf.EADock3: Minimizing binding mode 2359, energy is 802.74915, rmsd is 55.02331
sib.fastconf.EADock3: Minimizing binding mode 2360, energy is 804.80914, rmsd is 2.9195213
sib.fastconf.EADock3: Minimizing binding mode 2361, energy is 805.46014, rmsd is 36.056847
sib.fastconf.EADock3: Minimizing binding mode 2362, energy is 806.2312, rmsd is 26.838337
sib.fastconf.EADock3: Minimizing binding mode 2363, energy is 806.3186, rmsd is 38.33609
sib.fastconf.EADock3: Minimizing binding mode 2364, energy is 806.5236, rmsd is 42.127827
sib.fastconf.EADock3: Minimizing binding mode 2365, energy is 806.61816, rmsd is 52.962433
sib.fastconf.EADock3: Minimizing binding mode 2366, energy is 807.3269, rmsd is 46.438023
sib.fastconf.EADock3: Minimizing binding mode 2367, energy is 807.6808, rmsd is 22.86055
sib.fastconf.EADock3: Minimizing binding mode 2368, energy is 807.73096, rmsd is 26.120474
sib.fastconf.EADock3: Minimizing binding mode 2369, energy is 807.7766, rmsd is 21.805433
sib.fastconf.EADock3: Minimizing binding mode 2370, energy is 808.124, rmsd is 55.186707
sib.fastconf.EADock3: Minimizing binding mode 2371, energy is 809.04456, rmsd is 2.8059537
sib.fastconf.EADock3: Minimizing binding mode 2372, energy is 809.08417, rmsd is 49.02742
sib.fastconf.EADock3: Minimizing binding mode 2373, energy is 809.46954, rmsd is 3.4234529
sib.fastconf.EADock3: Minimizing binding mode 2374, energy is 809.8721, rmsd is 23.359125
sib.fastconf.EADock3: Minimizing binding mode 2375, energy is 809.9578, rmsd is 25.770676
sib.fastconf.EADock3: Minimizing binding mode 2376, energy is 810.1079, rmsd is 52.523006
sib.fastconf.EADock3: Minimizing binding mode 2377, energy is 810.88306, rmsd is 53.49594
sib.fastconf.EADock3: Minimizing binding mode 2378, energy is 811.75507, rmsd is 43.606792
sib.fastconf.EADock3: Minimizing binding mode 2379, energy is 812.3137, rmsd is 29.165264
sib.fastconf.EADock3: Minimizing binding mode 2380, energy is 812.34015, rmsd is 38.126064
sib.fastconf.EADock3: Minimizing binding mode 2381, energy is 812.7464, rmsd is 2.1885808
sib.fastconf.EADock3: Minimizing binding mode 2382, energy is 812.99493, rmsd is 22.5401
sib.fastconf.EADock3: Minimizing binding mode 2383, energy is 813.359, rmsd is 40.11973
sib.fastconf.EADock3: Minimizing binding mode 2384, energy is 813.702, rmsd is 34.66874
sib.fastconf.EADock3: Minimizing binding mode 2385, energy is 813.79346, rmsd is 32.34694
sib.fastconf.EADock3: Minimizing binding mode 2386, energy is 813.8312, rmsd is 21.83849
sib.fastconf.EADock3: Minimizing binding mode 2387, energy is 814.06305, rmsd is 21.510443
sib.fastconf.EADock3: Minimizing binding mode 2388, energy is 816.0885, rmsd is 27.760736
sib.fastconf.EADock3: Minimizing binding mode 2389, energy is 816.42834, rmsd is 33.579666
sib.fastconf.EADock3: Minimizing binding mode 2390, energy is 816.90247, rmsd is 23.895887
sib.fastconf.EADock3: Minimizing binding mode 2391, energy is 817.52515, rmsd is 19.952772
sib.fastconf.EADock3: Minimizing binding mode 2392, energy is 818.08923, rmsd is 21.20375
sib.fastconf.EADock3: Minimizing binding mode 2393, energy is 818.2023, rmsd is 25.433157
sib.fastconf.EADock3: Minimizing binding mode 2394, energy is 818.5286, rmsd is 51.23853
sib.fastconf.EADock3: Minimizing binding mode 2395, energy is 819.51434, rmsd is 23.23503
sib.fastconf.EADock3: Minimizing binding mode 2396, energy is 819.7814, rmsd is 52.462505
sib.fastconf.EADock3: Minimizing binding mode 2397, energy is 819.99036, rmsd is 34.902782
sib.fastconf.EADock3: Minimizing binding mode 2398, energy is 820.2043, rmsd is 2.0027347
sib.fastconf.EADock3: Minimizing binding mode 2399, energy is 820.9349, rmsd is 23.023577
sib.fastconf.EADock3: Minimizing binding mode 2400, energy is 822.338, rmsd is 35.678513
sib.fastconf.EADock3: Minimizing binding mode 2401, energy is 822.3422, rmsd is 39.70579
sib.fastconf.EADock3: Minimizing binding mode 2402, energy is 822.9151, rmsd is 28.35421
sib.fastconf.EADock3: Minimizing binding mode 2403, energy is 823.19525, rmsd is 37.359627
sib.fastconf.EADock3: Minimizing binding mode 2404, energy is 823.3267, rmsd is 50.716965
sib.fastconf.EADock3: Minimizing binding mode 2405, energy is 824.8585, rmsd is 44.257122
sib.fastconf.EADock3: Minimizing binding mode 2406, energy is 825.7583, rmsd is 42.916065
sib.fastconf.EADock3: Minimizing binding mode 2407, energy is 825.8879, rmsd is 34.061646
sib.fastconf.EADock3: Minimizing binding mode 2408, energy is 825.9838, rmsd is 41.649498
sib.fastconf.EADock3: Minimizing binding mode 2409, energy is 826.405, rmsd is 50.37163
sib.fastconf.EADock3: Minimizing binding mode 2410, energy is 826.6827, rmsd is 39.04144
sib.fastconf.EADock3: Minimizing binding mode 2411, energy is 826.9528, rmsd is 2.7187822
sib.fastconf.EADock3: Minimizing binding mode 2412, energy is 828.1476, rmsd is 46.8426
sib.fastconf.EADock3: Minimizing binding mode 2413, energy is 828.4136, rmsd is 39.265903
sib.fastconf.EADock3: Minimizing binding mode 2414, energy is 829.3101, rmsd is 33.962852
sib.fastconf.EADock3: Minimizing binding mode 2415, energy is 830.8374, rmsd is 18.43748
sib.fastconf.EADock3: Minimizing binding mode 2416, energy is 830.9076, rmsd is 53.03874
sib.fastconf.EADock3: Minimizing binding mode 2417, energy is 830.95355, rmsd is 39.853912
sib.fastconf.EADock3: Minimizing binding mode 2418, energy is 831.6134, rmsd is 48.514282
sib.fastconf.EADock3: Minimizing binding mode 2419, energy is 831.9132, rmsd is 2.9582226
sib.fastconf.EADock3: Minimizing binding mode 2420, energy is 831.9236, rmsd is 3.3946116
sib.fastconf.EADock3: Minimizing binding mode 2421, energy is 831.94293, rmsd is 49.876133
sib.fastconf.EADock3: Minimizing binding mode 2422, energy is 832.7107, rmsd is 54.88707
sib.fastconf.EADock3: Minimizing binding mode 2423, energy is 832.8957, rmsd is 59.27943
sib.fastconf.EADock3: Minimizing binding mode 2424, energy is 832.9883, rmsd is 37.93046
sib.fastconf.EADock3: Minimizing binding mode 2425, energy is 833.20746, rmsd is 18.123697
sib.fastconf.EADock3: Minimizing binding mode 2426, energy is 833.3654, rmsd is 2.8874922
sib.fastconf.EADock3: Minimizing binding mode 2427, energy is 833.45734, rmsd is 23.954596
sib.fastconf.EADock3: Minimizing binding mode 2428, energy is 833.5429, rmsd is 49.569763
sib.fastconf.EADock3: Minimizing binding mode 2429, energy is 834.10455, rmsd is 22.962996
sib.fastconf.EADock3: Minimizing binding mode 2430, energy is 836.4122, rmsd is 52.01392
sib.fastconf.EADock3: Minimizing binding mode 2431, energy is 837.1629, rmsd is 36.599186
sib.fastconf.EADock3: Minimizing binding mode 2432, energy is 838.17224, rmsd is 28.31346
sib.fastconf.EADock3: Minimizing binding mode 2433, energy is 838.50775, rmsd is 22.430952
sib.fastconf.EADock3: Minimizing binding mode 2434, energy is 838.6721, rmsd is 57.81915
sib.fastconf.EADock3: Minimizing binding mode 2435, energy is 838.7349, rmsd is 26.18124
sib.fastconf.EADock3: Minimizing binding mode 2436, energy is 839.338, rmsd is 50.43036
sib.fastconf.EADock3: Minimizing binding mode 2437, energy is 840.875, rmsd is 22.059542
sib.fastconf.EADock3: Minimizing binding mode 2438, energy is 840.8795, rmsd is 34.153152
sib.fastconf.EADock3: Minimizing binding mode 2439, energy is 840.9874, rmsd is 33.567104
sib.fastconf.EADock3: Minimizing binding mode 2440, energy is 841.0485, rmsd is 23.103931
sib.fastconf.EADock3: Minimizing binding mode 2441, energy is 841.4203, rmsd is 35.581116
sib.fastconf.EADock3: Minimizing binding mode 2442, energy is 841.4753, rmsd is 44.847443
sib.fastconf.EADock3: Minimizing binding mode 2443, energy is 841.6289, rmsd is 39.01389
sib.fastconf.EADock3: Minimizing binding mode 2444, energy is 842.63824, rmsd is 36.59375
sib.fastconf.EADock3: Minimizing binding mode 2445, energy is 842.8502, rmsd is 28.86659
sib.fastconf.EADock3: Minimizing binding mode 2446, energy is 843.0616, rmsd is 36.680485
sib.fastconf.EADock3: Minimizing binding mode 2447, energy is 843.666, rmsd is 34.221203
sib.fastconf.EADock3: Minimizing binding mode 2448, energy is 844.0383, rmsd is 51.43452
sib.fastconf.EADock3: Minimizing binding mode 2449, energy is 844.44037, rmsd is 36.23518
sib.fastconf.EADock3: Minimizing binding mode 2450, energy is 844.4912, rmsd is 20.974596
sib.fastconf.EADock3: Minimizing binding mode 2451, energy is 844.6947, rmsd is 41.61936
sib.fastconf.EADock3: Minimizing binding mode 2452, energy is 844.78436, rmsd is 37.366028
sib.fastconf.EADock3: Minimizing binding mode 2453, energy is 845.1596, rmsd is 38.701138
sib.fastconf.EADock3: Minimizing binding mode 2454, energy is 845.5741, rmsd is 27.94333
sib.fastconf.EADock3: Minimizing binding mode 2455, energy is 845.6406, rmsd is 21.269503
sib.fastconf.EADock3: Minimizing binding mode 2456, energy is 846.53906, rmsd is 43.458076
sib.fastconf.EADock3: Minimizing binding mode 2457, energy is 848.9057, rmsd is 40.17654
sib.fastconf.EADock3: Minimizing binding mode 2458, energy is 850.222, rmsd is 21.87751
sib.fastconf.EADock3: Minimizing binding mode 2459, energy is 850.53217, rmsd is 28.839468
sib.fastconf.EADock3: Minimizing binding mode 2460, energy is 850.7928, rmsd is 48.207172
sib.fastconf.EADock3: Minimizing binding mode 2461, energy is 851.0389, rmsd is 37.993507
sib.fastconf.EADock3: Minimizing binding mode 2462, energy is 851.57654, rmsd is 39.360283
sib.fastconf.EADock3: Minimizing binding mode 2463, energy is 851.963, rmsd is 45.345524
sib.fastconf.EADock3: Minimizing binding mode 2464, energy is 852.45245, rmsd is 46.799534
sib.fastconf.EADock3: Minimizing binding mode 2465, energy is 853.3396, rmsd is 54.638966
sib.fastconf.EADock3: Minimizing binding mode 2466, energy is 853.41876, rmsd is 2.6442916
sib.fastconf.EADock3: Minimizing binding mode 2467, energy is 853.4647, rmsd is 21.327427
sib.fastconf.EADock3: Minimizing binding mode 2468, energy is 854.147, rmsd is 26.250315
sib.fastconf.EADock3: Minimizing binding mode 2469, energy is 854.9797, rmsd is 36.77244
sib.fastconf.EADock3: Minimizing binding mode 2470, energy is 855.55383, rmsd is 42.00686
sib.fastconf.EADock3: Minimizing binding mode 2471, energy is 855.78937, rmsd is 37.85586
sib.fastconf.EADock3: Minimizing binding mode 2472, energy is 857.076, rmsd is 47.35613
sib.fastconf.EADock3: Minimizing binding mode 2473, energy is 857.1252, rmsd is 28.830215
sib.fastconf.EADock3: Minimizing binding mode 2474, energy is 857.47107, rmsd is 44.50307
sib.fastconf.EADock3: Minimizing binding mode 2475, energy is 857.55316, rmsd is 34.4753
sib.fastconf.EADock3: Minimizing binding mode 2476, energy is 857.89966, rmsd is 47.48428
sib.fastconf.EADock3: Minimizing binding mode 2477, energy is 857.9446, rmsd is 41.483734
sib.fastconf.EADock3: Minimizing binding mode 2478, energy is 858.21893, rmsd is 21.306767
sib.fastconf.EADock3: Minimizing binding mode 2479, energy is 858.4965, rmsd is 43.406757
sib.fastconf.EADock3: Minimizing binding mode 2480, energy is 858.7846, rmsd is 39.194412
sib.fastconf.EADock3: Minimizing binding mode 2481, energy is 859.1628, rmsd is 38.286545
sib.fastconf.EADock3: Minimizing binding mode 2482, energy is 860.1067, rmsd is 26.14148
sib.fastconf.EADock3: Minimizing binding mode 2483, energy is 860.63794, rmsd is 21.144457
sib.fastconf.EADock3: Minimizing binding mode 2484, energy is 861.44324, rmsd is 35.18868
sib.fastconf.EADock3: Minimizing binding mode 2485, energy is 861.5137, rmsd is 27.628366
sib.fastconf.EADock3: Minimizing binding mode 2486, energy is 862.2835, rmsd is 53.025578
sib.fastconf.EADock3: Minimizing binding mode 2487, energy is 862.36127, rmsd is 34.760838
sib.fastconf.EADock3: Minimizing binding mode 2488, energy is 862.89514, rmsd is 28.67152
sib.fastconf.EADock3: Minimizing binding mode 2489, energy is 863.351, rmsd is 34.337048
sib.fastconf.EADock3: Minimizing binding mode 2490, energy is 863.66406, rmsd is 36.814373
sib.fastconf.EADock3: Minimizing binding mode 2491, energy is 863.9337, rmsd is 39.847713
sib.fastconf.EADock3: Minimizing binding mode 2492, energy is 864.4212, rmsd is 23.436703
sib.fastconf.EADock3: Minimizing binding mode 2493, energy is 864.5226, rmsd is 24.045603
sib.fastconf.EADock3: Minimizing binding mode 2494, energy is 864.67786, rmsd is 3.3279123
sib.fastconf.EADock3: Minimizing binding mode 2495, energy is 866.54645, rmsd is 48.606808
sib.fastconf.EADock3: Minimizing binding mode 2496, energy is 866.6258, rmsd is 52.19055
sib.fastconf.EADock3: Minimizing binding mode 2497, energy is 866.66864, rmsd is 50.561184
sib.fastconf.EADock3: Minimizing binding mode 2498, energy is 867.38635, rmsd is 41.934017
sib.fastconf.EADock3: Minimizing binding mode 2499, energy is 868.1335, rmsd is 41.2333
sib.fastconf.EADock3: Minimizing binding mode 2500, energy is 870.6106, rmsd is 41.620438
sib.fastconf.EADock3: Minimizing binding mode 2501, energy is 870.79193, rmsd is 43.940533
sib.fastconf.EADock3: Minimizing binding mode 2502, energy is 870.86536, rmsd is 38.56756
sib.fastconf.EADock3: Minimizing binding mode 2503, energy is 874.0374, rmsd is 28.725405
sib.fastconf.EADock3: Minimizing binding mode 2504, energy is 876.96735, rmsd is 36.10567
sib.fastconf.EADock3: Minimizing binding mode 2505, energy is 878.2457, rmsd is 34.53821
sib.fastconf.EADock3: Minimizing binding mode 2506, energy is 879.43353, rmsd is 27.598999
sib.fastconf.EADock3: Minimizing binding mode 2507, energy is 879.7878, rmsd is 28.691933
sib.fastconf.EADock3: Minimizing binding mode 2508, energy is 880.06915, rmsd is 37.012897
sib.fastconf.EADock3: Minimizing binding mode 2509, energy is 880.46826, rmsd is 39.19887
sib.fastconf.EADock3: Minimizing binding mode 2510, energy is 880.5918, rmsd is 35.79717
sib.fastconf.EADock3: Minimizing binding mode 2511, energy is 880.6428, rmsd is 2.7715337
sib.fastconf.EADock3: Minimizing binding mode 2512, energy is 881.4704, rmsd is 52.183334
sib.fastconf.EADock3: Minimizing binding mode 2513, energy is 881.63245, rmsd is 20.167744
sib.fastconf.EADock3: Minimizing binding mode 2514, energy is 882.01196, rmsd is 26.588821
sib.fastconf.EADock3: Minimizing binding mode 2515, energy is 883.1114, rmsd is 42.30589
sib.fastconf.EADock3: Minimizing binding mode 2516, energy is 884.3288, rmsd is 17.826134
sib.fastconf.EADock3: Minimizing binding mode 2517, energy is 884.47925, rmsd is 40.91299
sib.fastconf.EADock3: Minimizing binding mode 2518, energy is 884.67224, rmsd is 27.024225
sib.fastconf.EADock3: Minimizing binding mode 2519, energy is 885.17993, rmsd is 1.857914
sib.fastconf.EADock3: Minimizing binding mode 2520, energy is 886.05475, rmsd is 36.392998
sib.fastconf.EADock3: Minimizing binding mode 2521, energy is 886.0833, rmsd is 47.152523
sib.fastconf.EADock3: Minimizing binding mode 2522, energy is 887.33844, rmsd is 44.00795
sib.fastconf.EADock3: Minimizing binding mode 2523, energy is 888.01306, rmsd is 34.54467
sib.fastconf.EADock3: Minimizing binding mode 2524, energy is 888.3055, rmsd is 29.621944
sib.fastconf.EADock3: Minimizing binding mode 2525, energy is 889.3671, rmsd is 39.413452
sib.fastconf.EADock3: Minimizing binding mode 2526, energy is 889.5598, rmsd is 34.34837
sib.fastconf.EADock3: Minimizing binding mode 2527, energy is 891.2889, rmsd is 45.42626
sib.fastconf.EADock3: Minimizing binding mode 2528, energy is 891.41284, rmsd is 23.820784
sib.fastconf.EADock3: Minimizing binding mode 2529, energy is 891.59424, rmsd is 50.561886
sib.fastconf.EADock3: Minimizing binding mode 2530, energy is 892.047, rmsd is 34.341362
sib.fastconf.EADock3: Minimizing binding mode 2531, energy is 892.0748, rmsd is 27.23832
sib.fastconf.EADock3: Minimizing binding mode 2532, energy is 892.3822, rmsd is 52.45332
sib.fastconf.EADock3: Minimizing binding mode 2533, energy is 892.45245, rmsd is 1.5088503
sib.fastconf.EADock3: Minimizing binding mode 2534, energy is 892.50574, rmsd is 49.22854
sib.fastconf.EADock3: Minimizing binding mode 2535, energy is 892.8242, rmsd is 42.72313
sib.fastconf.EADock3: Minimizing binding mode 2536, energy is 892.8891, rmsd is 51.870773
sib.fastconf.EADock3: Minimizing binding mode 2537, energy is 893.634, rmsd is 23.273779
sib.fastconf.EADock3: Minimizing binding mode 2538, energy is 893.8016, rmsd is 23.66233
sib.fastconf.EADock3: Minimizing binding mode 2539, energy is 894.39685, rmsd is 22.01933
sib.fastconf.EADock3: Minimizing binding mode 2540, energy is 894.5102, rmsd is 37.663433
sib.fastconf.EADock3: Minimizing binding mode 2541, energy is 895.7478, rmsd is 3.113587
sib.fastconf.EADock3: Minimizing binding mode 2542, energy is 896.82367, rmsd is 54.617847
sib.fastconf.EADock3: Minimizing binding mode 2543, energy is 896.86426, rmsd is 28.627937
sib.fastconf.EADock3: Minimizing binding mode 2544, energy is 897.1245, rmsd is 22.941515
sib.fastconf.EADock3: Minimizing binding mode 2545, energy is 897.1826, rmsd is 20.531252
sib.fastconf.EADock3: Minimizing binding mode 2546, energy is 897.5519, rmsd is 49.552067
sib.fastconf.EADock3: Minimizing binding mode 2547, energy is 898.3682, rmsd is 35.1693
sib.fastconf.EADock3: Minimizing binding mode 2548, energy is 898.9298, rmsd is 21.233986
sib.fastconf.EADock3: Minimizing binding mode 2549, energy is 899.261, rmsd is 36.614037
sib.fastconf.EADock3: Minimizing binding mode 2550, energy is 899.3246, rmsd is 47.75687
sib.fastconf.EADock3: Minimizing binding mode 2551, energy is 899.4483, rmsd is 46.16621
sib.fastconf.EADock3: Minimizing binding mode 2552, energy is 899.6718, rmsd is 49.284157
sib.fastconf.EADock3: Minimizing binding mode 2553, energy is 900.52655, rmsd is 37.54973
sib.fastconf.EADock3: Minimizing binding mode 2554, energy is 902.4206, rmsd is 53.026207
sib.fastconf.EADock3: Minimizing binding mode 2555, energy is 902.72424, rmsd is 44.047398
sib.fastconf.EADock3: Minimizing binding mode 2556, energy is 903.142, rmsd is 51.017998
sib.fastconf.EADock3: Minimizing binding mode 2557, energy is 903.40674, rmsd is 50.028553
sib.fastconf.EADock3: Minimizing binding mode 2558, energy is 904.9876, rmsd is 33.260166
sib.fastconf.EADock3: Minimizing binding mode 2559, energy is 905.0012, rmsd is 46.590416
sib.fastconf.EADock3: Minimizing binding mode 2560, energy is 905.36743, rmsd is 36.73498
sib.fastconf.EADock3: Minimizing binding mode 2561, energy is 906.24194, rmsd is 41.196
sib.fastconf.EADock3: Minimizing binding mode 2562, energy is 906.3604, rmsd is 48.90029
sib.fastconf.EADock3: Minimizing binding mode 2563, energy is 907.2828, rmsd is 35.094666
sib.fastconf.EADock3: Minimizing binding mode 2564, energy is 907.3126, rmsd is 28.353237
sib.fastconf.EADock3: Minimizing binding mode 2565, energy is 907.3237, rmsd is 21.352814
sib.fastconf.EADock3: Minimizing binding mode 2566, energy is 907.86945, rmsd is 22.25144
sib.fastconf.EADock3: Minimizing binding mode 2567, energy is 908.9319, rmsd is 37.16443
sib.fastconf.EADock3: Minimizing binding mode 2568, energy is 909.4973, rmsd is 27.786467
sib.fastconf.EADock3: Minimizing binding mode 2569, energy is 909.50464, rmsd is 1.761755
sib.fastconf.EADock3: Minimizing binding mode 2570, energy is 909.7954, rmsd is 50.277435
sib.fastconf.EADock3: Minimizing binding mode 2571, energy is 909.8364, rmsd is 42.353146
sib.fastconf.EADock3: Minimizing binding mode 2572, energy is 909.8438, rmsd is 23.664215
sib.fastconf.EADock3: Minimizing binding mode 2573, energy is 910.33453, rmsd is 52.687862
sib.fastconf.EADock3: Minimizing binding mode 2574, energy is 910.6761, rmsd is 53.22003
sib.fastconf.EADock3: Minimizing binding mode 2575, energy is 911.8462, rmsd is 1.8665452
sib.fastconf.EADock3: Minimizing binding mode 2576, energy is 912.6011, rmsd is 26.2277
sib.fastconf.EADock3: Minimizing binding mode 2577, energy is 914.94055, rmsd is 35.85174
sib.fastconf.EADock3: Minimizing binding mode 2578, energy is 915.4423, rmsd is 21.417633
sib.fastconf.EADock3: Minimizing binding mode 2579, energy is 915.6664, rmsd is 44.34684
sib.fastconf.EADock3: Minimizing binding mode 2580, energy is 915.7511, rmsd is 44.12602
sib.fastconf.EADock3: Minimizing binding mode 2581, energy is 915.82654, rmsd is 48.72524
sib.fastconf.EADock3: Minimizing binding mode 2582, energy is 916.6849, rmsd is 47.775772
sib.fastconf.EADock3: Minimizing binding mode 2583, energy is 918.3767, rmsd is 21.740791
sib.fastconf.EADock3: Minimizing binding mode 2584, energy is 918.50854, rmsd is 33.66536
sib.fastconf.EADock3: Minimizing binding mode 2585, energy is 918.7157, rmsd is 52.589264
sib.fastconf.EADock3: Minimizing binding mode 2586, energy is 918.83124, rmsd is 37.32852
sib.fastconf.EADock3: Minimizing binding mode 2587, energy is 918.92084, rmsd is 42.686314
sib.fastconf.EADock3: Minimizing binding mode 2588, energy is 919.4799, rmsd is 26.662115
sib.fastconf.EADock3: Minimizing binding mode 2589, energy is 919.6296, rmsd is 48.202095
sib.fastconf.EADock3: Minimizing binding mode 2590, energy is 919.74774, rmsd is 24.583641
sib.fastconf.EADock3: Minimizing binding mode 2591, energy is 919.9404, rmsd is 51.05959
sib.fastconf.EADock3: Minimizing binding mode 2592, energy is 921.02, rmsd is 37.112865
sib.fastconf.EADock3: Minimizing binding mode 2593, energy is 921.1784, rmsd is 20.531956
sib.fastconf.EADock3: Minimizing binding mode 2594, energy is 921.42, rmsd is 1.9110706
sib.fastconf.EADock3: Minimizing binding mode 2595, energy is 921.5091, rmsd is 24.607304
sib.fastconf.EADock3: Minimizing binding mode 2596, energy is 922.7122, rmsd is 35.624783
sib.fastconf.EADock3: Minimizing binding mode 2597, energy is 923.04706, rmsd is 23.006855
sib.fastconf.EADock3: Minimizing binding mode 2598, energy is 924.43005, rmsd is 21.364292
sib.fastconf.EADock3: Minimizing binding mode 2599, energy is 924.4685, rmsd is 48.744747
sib.fastconf.EADock3: Minimizing binding mode 2600, energy is 925.74506, rmsd is 28.090271
sib.fastconf.EADock3: Minimizing binding mode 2601, energy is 925.7562, rmsd is 26.79786
sib.fastconf.EADock3: Minimizing binding mode 2602, energy is 926.08057, rmsd is 50.868862
sib.fastconf.EADock3: Minimizing binding mode 2603, energy is 927.0839, rmsd is 25.862425
sib.fastconf.EADock3: Minimizing binding mode 2604, energy is 927.10175, rmsd is 43.268425
sib.fastconf.EADock3: Minimizing binding mode 2605, energy is 928.25635, rmsd is 52.924114
sib.fastconf.EADock3: Minimizing binding mode 2606, energy is 929.0, rmsd is 46.473248
sib.fastconf.EADock3: Minimizing binding mode 2607, energy is 929.1019, rmsd is 38.21819
sib.fastconf.EADock3: Minimizing binding mode 2608, energy is 929.33856, rmsd is 37.22543
sib.fastconf.EADock3: Minimizing binding mode 2609, energy is 930.0707, rmsd is 51.76715
sib.fastconf.EADock3: Minimizing binding mode 2610, energy is 930.52795, rmsd is 47.551266
sib.fastconf.EADock3: Minimizing binding mode 2611, energy is 930.8348, rmsd is 42.78989
sib.fastconf.EADock3: Minimizing binding mode 2612, energy is 931.57117, rmsd is 49.826176
sib.fastconf.EADock3: Minimizing binding mode 2613, energy is 935.14606, rmsd is 38.414455
sib.fastconf.EADock3: Minimizing binding mode 2614, energy is 936.59265, rmsd is 48.36219
sib.fastconf.EADock3: Minimizing binding mode 2615, energy is 937.434, rmsd is 49.795723
sib.fastconf.EADock3: Minimizing binding mode 2616, energy is 937.5654, rmsd is 26.671297
sib.fastconf.EADock3: Minimizing binding mode 2617, energy is 937.84973, rmsd is 28.745693
sib.fastconf.EADock3: Minimizing binding mode 2618, energy is 938.99036, rmsd is 45.802418
sib.fastconf.EADock3: Minimizing binding mode 2619, energy is 939.1464, rmsd is 1.9858468
sib.fastconf.EADock3: Minimizing binding mode 2620, energy is 939.47644, rmsd is 3.1247866
sib.fastconf.EADock3: Minimizing binding mode 2621, energy is 940.1349, rmsd is 54.48318
sib.fastconf.EADock3: Minimizing binding mode 2622, energy is 940.24084, rmsd is 28.22258
sib.fastconf.EADock3: Minimizing binding mode 2623, energy is 940.3014, rmsd is 50.573307
sib.fastconf.EADock3: Minimizing binding mode 2624, energy is 941.0969, rmsd is 28.74509
sib.fastconf.EADock3: Minimizing binding mode 2625, energy is 942.3478, rmsd is 52.220764
sib.fastconf.EADock3: Minimizing binding mode 2626, energy is 942.37714, rmsd is 45.22807
sib.fastconf.EADock3: Minimizing binding mode 2627, energy is 942.46356, rmsd is 30.011793
sib.fastconf.EADock3: Minimizing binding mode 2628, energy is 942.55743, rmsd is 2.7743309
sib.fastconf.EADock3: Minimizing binding mode 2629, energy is 942.65424, rmsd is 22.920027
sib.fastconf.EADock3: Minimizing binding mode 2630, energy is 942.95905, rmsd is 21.688766
sib.fastconf.EADock3: Minimizing binding mode 2631, energy is 943.33606, rmsd is 27.582394
sib.fastconf.EADock3: Minimizing binding mode 2632, energy is 943.4605, rmsd is 20.143421
sib.fastconf.EADock3: Minimizing binding mode 2633, energy is 944.12195, rmsd is 2.3819752
sib.fastconf.EADock3: Minimizing binding mode 2634, energy is 945.4325, rmsd is 22.165781
sib.fastconf.EADock3: Minimizing binding mode 2635, energy is 945.7326, rmsd is 37.064034
sib.fastconf.EADock3: Minimizing binding mode 2636, energy is 945.91815, rmsd is 42.493774
sib.fastconf.EADock3: Minimizing binding mode 2637, energy is 945.9818, rmsd is 37.49291
sib.fastconf.EADock3: Minimizing binding mode 2638, energy is 946.15857, rmsd is 33.237938
sib.fastconf.EADock3: Minimizing binding mode 2639, energy is 947.3992, rmsd is 47.557285
sib.fastconf.EADock3: Minimizing binding mode 2640, energy is 948.007, rmsd is 44.27982
sib.fastconf.EADock3: Minimizing binding mode 2641, energy is 948.2329, rmsd is 1.9018564
sib.fastconf.EADock3: Minimizing binding mode 2642, energy is 948.2862, rmsd is 52.40986
sib.fastconf.EADock3: Minimizing binding mode 2643, energy is 948.2999, rmsd is 21.764486
sib.fastconf.EADock3: Minimizing binding mode 2644, energy is 948.93274, rmsd is 2.9627712
sib.fastconf.EADock3: Minimizing binding mode 2645, energy is 950.58734, rmsd is 48.77199
sib.fastconf.EADock3: Minimizing binding mode 2646, energy is 950.68933, rmsd is 1.7137291
sib.fastconf.EADock3: Minimizing binding mode 2647, energy is 950.9031, rmsd is 34.46522
sib.fastconf.EADock3: Minimizing binding mode 2648, energy is 951.64825, rmsd is 50.15536
sib.fastconf.EADock3: Minimizing binding mode 2649, energy is 952.80225, rmsd is 43.023975
sib.fastconf.EADock3: Minimizing binding mode 2650, energy is 953.3973, rmsd is 26.214117
sib.fastconf.EADock3: Minimizing binding mode 2651, energy is 953.8507, rmsd is 49.35583
sib.fastconf.EADock3: Minimizing binding mode 2652, energy is 955.394, rmsd is 24.369902
sib.fastconf.EADock3: Minimizing binding mode 2653, energy is 955.93524, rmsd is 21.853529
sib.fastconf.EADock3: Minimizing binding mode 2654, energy is 956.1906, rmsd is 28.277868
sib.fastconf.EADock3: Minimizing binding mode 2655, energy is 956.624, rmsd is 51.61342
sib.fastconf.EADock3: Minimizing binding mode 2656, energy is 956.8523, rmsd is 49.133812
sib.fastconf.EADock3: Minimizing binding mode 2657, energy is 956.8627, rmsd is 24.034325
sib.fastconf.EADock3: Minimizing binding mode 2658, energy is 957.22644, rmsd is 39.44486
sib.fastconf.EADock3: Minimizing binding mode 2659, energy is 958.46124, rmsd is 38.41663
sib.fastconf.EADock3: Minimizing binding mode 2660, energy is 958.7799, rmsd is 54.41428
sib.fastconf.EADock3: Minimizing binding mode 2661, energy is 959.2523, rmsd is 20.923414
sib.fastconf.EADock3: Minimizing binding mode 2662, energy is 959.408, rmsd is 1.347846
sib.fastconf.EADock3: Minimizing binding mode 2663, energy is 959.47424, rmsd is 38.660908
sib.fastconf.EADock3: Minimizing binding mode 2664, energy is 959.5757, rmsd is 49.539104
sib.fastconf.EADock3: Minimizing binding mode 2665, energy is 961.91376, rmsd is 20.317865
sib.fastconf.EADock3: Minimizing binding mode 2666, energy is 962.1756, rmsd is 46.650574
sib.fastconf.EADock3: Minimizing binding mode 2667, energy is 962.9234, rmsd is 22.592192
sib.fastconf.EADock3: Minimizing binding mode 2668, energy is 964.5125, rmsd is 21.740578
sib.fastconf.EADock3: Minimizing binding mode 2669, energy is 964.6974, rmsd is 20.610136
sib.fastconf.EADock3: Minimizing binding mode 2670, energy is 964.7393, rmsd is 39.888546
sib.fastconf.EADock3: Minimizing binding mode 2671, energy is 965.1325, rmsd is 24.348572
sib.fastconf.EADock3: Minimizing binding mode 2672, energy is 966.5403, rmsd is 48.806606
sib.fastconf.EADock3: Minimizing binding mode 2673, energy is 968.46344, rmsd is 21.401697
sib.fastconf.EADock3: Minimizing binding mode 2674, energy is 968.79926, rmsd is 28.702055
sib.fastconf.EADock3: Minimizing binding mode 2675, energy is 968.9837, rmsd is 24.202997
sib.fastconf.EADock3: Minimizing binding mode 2676, energy is 969.2448, rmsd is 38.9897
sib.fastconf.EADock3: Minimizing binding mode 2677, energy is 969.53357, rmsd is 21.831097
sib.fastconf.EADock3: Minimizing binding mode 2678, energy is 969.8921, rmsd is 39.47867
sib.fastconf.EADock3: Minimizing binding mode 2679, energy is 971.1115, rmsd is 45.107388
sib.fastconf.EADock3: Minimizing binding mode 2680, energy is 971.6342, rmsd is 23.655628
sib.fastconf.EADock3: Minimizing binding mode 2681, energy is 973.7231, rmsd is 20.59655
sib.fastconf.EADock3: Minimizing binding mode 2682, energy is 973.9366, rmsd is 28.960949
sib.fastconf.EADock3: Minimizing binding mode 2683, energy is 975.1654, rmsd is 24.13197
sib.fastconf.EADock3: Minimizing binding mode 2684, energy is 975.6631, rmsd is 22.721914
sib.fastconf.EADock3: Minimizing binding mode 2685, energy is 976.3787, rmsd is 26.462626
sib.fastconf.EADock3: Minimizing binding mode 2686, energy is 976.8158, rmsd is 21.99594
sib.fastconf.EADock3: Minimizing binding mode 2687, energy is 976.96796, rmsd is 49.347385
sib.fastconf.EADock3: Minimizing binding mode 2688, energy is 977.05444, rmsd is 37.355644
sib.fastconf.EADock3: Minimizing binding mode 2689, energy is 978.00287, rmsd is 23.089678
sib.fastconf.EADock3: Minimizing binding mode 2690, energy is 978.38165, rmsd is 34.09211
sib.fastconf.EADock3: Minimizing binding mode 2691, energy is 978.7555, rmsd is 45.9259
sib.fastconf.EADock3: Minimizing binding mode 2692, energy is 979.37976, rmsd is 22.931444
sib.fastconf.EADock3: Minimizing binding mode 2693, energy is 980.17645, rmsd is 44.620155
sib.fastconf.EADock3: Minimizing binding mode 2694, energy is 980.4798, rmsd is 50.188416
sib.fastconf.EADock3: Minimizing binding mode 2695, energy is 980.81995, rmsd is 28.01566
sib.fastconf.EADock3: Minimizing binding mode 2696, energy is 981.93335, rmsd is 53.181915
sib.fastconf.EADock3: Minimizing binding mode 2697, energy is 982.09814, rmsd is 46.672604
sib.fastconf.EADock3: Minimizing binding mode 2698, energy is 982.2997, rmsd is 22.743202
sib.fastconf.EADock3: Minimizing binding mode 2699, energy is 983.0967, rmsd is 43.366745
sib.fastconf.EADock3: Minimizing binding mode 2700, energy is 983.2986, rmsd is 33.401474
sib.fastconf.EADock3: Minimizing binding mode 2701, energy is 983.9095, rmsd is 44.4494
sib.fastconf.EADock3: Minimizing binding mode 2702, energy is 985.0223, rmsd is 47.847786
sib.fastconf.EADock3: Minimizing binding mode 2703, energy is 987.3855, rmsd is 50.433445
sib.fastconf.EADock3: Minimizing binding mode 2704, energy is 987.39923, rmsd is 50.305923
sib.fastconf.EADock3: Minimizing binding mode 2705, energy is 987.51227, rmsd is 51.04591
sib.fastconf.EADock3: Minimizing binding mode 2706, energy is 987.76227, rmsd is 34.81056
sib.fastconf.EADock3: Minimizing binding mode 2707, energy is 988.2023, rmsd is 35.861607
sib.fastconf.EADock3: Minimizing binding mode 2708, energy is 988.27045, rmsd is 1.8481255
sib.fastconf.EADock3: Minimizing binding mode 2709, energy is 989.3188, rmsd is 19.077953
sib.fastconf.EADock3: Minimizing binding mode 2710, energy is 990.0339, rmsd is 48.652836
sib.fastconf.EADock3: Minimizing binding mode 2711, energy is 990.3664, rmsd is 34.729458
sib.fastconf.EADock3: Minimizing binding mode 2712, energy is 990.927, rmsd is 35.10163
sib.fastconf.EADock3: Minimizing binding mode 2713, energy is 991.7554, rmsd is 22.732388
sib.fastconf.EADock3: Minimizing binding mode 2714, energy is 994.24915, rmsd is 47.280704
sib.fastconf.EADock3: Minimizing binding mode 2715, energy is 994.4527, rmsd is 47.949417
sib.fastconf.EADock3: Minimizing binding mode 2716, energy is 995.1283, rmsd is 22.311441
sib.fastconf.EADock3: Minimizing binding mode 2717, energy is 996.2371, rmsd is 33.9288
sib.fastconf.EADock3: Minimizing binding mode 2718, energy is 997.54913, rmsd is 48.510853
sib.fastconf.EADock3: Minimizing binding mode 2719, energy is 998.0512, rmsd is 24.67691
sib.fastconf.EADock3: Minimizing binding mode 2720, energy is 999.2866, rmsd is 41.402615
sib.fastconf.EADock3: Minimizing binding mode 2721, energy is 999.6141, rmsd is 26.183083
sib.fastconf.EADock3: Minimizing binding mode 2722, energy is 999.65063, rmsd is 24.91261
sib.fastconf.EADock3: Minimizing binding mode 2723, energy is 1001.9527, rmsd is 34.23232
sib.fastconf.EADock3: Minimizing binding mode 2724, energy is 1002.98926, rmsd is 35.31999
sib.fastconf.EADock3: Minimizing binding mode 2725, energy is 1003.1857, rmsd is 26.83126
sib.fastconf.EADock3: Minimizing binding mode 2726, energy is 1004.0072, rmsd is 35.13026
sib.fastconf.EADock3: Minimizing binding mode 2727, energy is 1004.34875, rmsd is 22.44005
sib.fastconf.EADock3: Minimizing binding mode 2728, energy is 1004.60034, rmsd is 23.02528
sib.fastconf.EADock3: Minimizing binding mode 2729, energy is 1004.6869, rmsd is 40.562122
sib.fastconf.EADock3: Minimizing binding mode 2730, energy is 1005.23, rmsd is 33.292103
sib.fastconf.EADock3: Minimizing binding mode 2731, energy is 1005.66113, rmsd is 45.801544
sib.fastconf.EADock3: Minimizing binding mode 2732, energy is 1007.11346, rmsd is 51.395138
sib.fastconf.EADock3: Minimizing binding mode 2733, energy is 1008.8889, rmsd is 23.203657
sib.fastconf.EADock3: Minimizing binding mode 2734, energy is 1009.17535, rmsd is 28.826408
sib.fastconf.EADock3: Minimizing binding mode 2735, energy is 1009.4921, rmsd is 26.321177
sib.fastconf.EADock3: Minimizing binding mode 2736, energy is 1009.49866, rmsd is 21.023445
sib.fastconf.EADock3: Minimizing binding mode 2737, energy is 1009.7526, rmsd is 42.51192
sib.fastconf.EADock3: Minimizing binding mode 2738, energy is 1011.7521, rmsd is 35.4887
sib.fastconf.EADock3: Minimizing binding mode 2739, energy is 1012.1653, rmsd is 43.78594
sib.fastconf.EADock3: Minimizing binding mode 2740, energy is 1012.19324, rmsd is 36.02865
sib.fastconf.EADock3: Minimizing binding mode 2741, energy is 1012.31805, rmsd is 53.656887
sib.fastconf.EADock3: Minimizing binding mode 2742, energy is 1012.83887, rmsd is 22.075863
sib.fastconf.EADock3: Minimizing binding mode 2743, energy is 1013.8257, rmsd is 22.824203
sib.fastconf.EADock3: Minimizing binding mode 2744, energy is 1013.9787, rmsd is 52.254047
sib.fastconf.EADock3: Minimizing binding mode 2745, energy is 1014.4155, rmsd is 37.073708
sib.fastconf.EADock3: Minimizing binding mode 2746, energy is 1015.23956, rmsd is 24.933828
sib.fastconf.EADock3: Minimizing binding mode 2747, energy is 1015.9101, rmsd is 41.31193
sib.fastconf.EADock3: Minimizing binding mode 2748, energy is 1016.10394, rmsd is 51.313313
sib.fastconf.EADock3: Minimizing binding mode 2749, energy is 1016.32404, rmsd is 40.73345
sib.fastconf.EADock3: Minimizing binding mode 2750, energy is 1017.44257, rmsd is 47.109573
sib.fastconf.EADock3: Minimizing binding mode 2751, energy is 1018.9661, rmsd is 40.032536
sib.fastconf.EADock3: Minimizing binding mode 2752, energy is 1019.0043, rmsd is 28.813828
sib.fastconf.EADock3: Minimizing binding mode 2753, energy is 1019.3545, rmsd is 14.449889
sib.fastconf.EADock3: Minimizing binding mode 2754, energy is 1019.7103, rmsd is 51.708946
sib.fastconf.EADock3: Minimizing binding mode 2755, energy is 1020.1656, rmsd is 54.434444
sib.fastconf.EADock3: Minimizing binding mode 2756, energy is 1020.87494, rmsd is 31.576696
sib.fastconf.EADock3: Minimizing binding mode 2757, energy is 1022.88617, rmsd is 20.945341
sib.fastconf.EADock3: Minimizing binding mode 2758, energy is 1023.642, rmsd is 34.42892
sib.fastconf.EADock3: Minimizing binding mode 2759, energy is 1024.2585, rmsd is 27.48895
sib.fastconf.EADock3: Minimizing binding mode 2760, energy is 1025.9863, rmsd is 42.79175
sib.fastconf.EADock3: Minimizing binding mode 2761, energy is 1026.0735, rmsd is 22.451141
sib.fastconf.EADock3: Minimizing binding mode 2762, energy is 1026.5323, rmsd is 22.747072
sib.fastconf.EADock3: Minimizing binding mode 2763, energy is 1027.4563, rmsd is 22.28865
sib.fastconf.EADock3: Minimizing binding mode 2764, energy is 1028.1951, rmsd is 53.916286
sib.fastconf.EADock3: Minimizing binding mode 2765, energy is 1028.5593, rmsd is 43.666874
sib.fastconf.EADock3: Minimizing binding mode 2766, energy is 1029.1083, rmsd is 20.320114
sib.fastconf.EADock3: Minimizing binding mode 2767, energy is 1030.2445, rmsd is 22.129866
sib.fastconf.EADock3: Minimizing binding mode 2768, energy is 1031.1085, rmsd is 23.38885
sib.fastconf.EADock3: Minimizing binding mode 2769, energy is 1031.3923, rmsd is 50.430584
sib.fastconf.EADock3: Minimizing binding mode 2770, energy is 1032.8796, rmsd is 20.95565
sib.fastconf.EADock3: Minimizing binding mode 2771, energy is 1033.1, rmsd is 52.53167
sib.fastconf.EADock3: Minimizing binding mode 2772, energy is 1035.4102, rmsd is 1.4743757
sib.fastconf.EADock3: Minimizing binding mode 2773, energy is 1036.0074, rmsd is 35.85877
sib.fastconf.EADock3: Minimizing binding mode 2774, energy is 1036.0093, rmsd is 45.33649
sib.fastconf.EADock3: Minimizing binding mode 2775, energy is 1036.6599, rmsd is 38.28404
sib.fastconf.EADock3: Minimizing binding mode 2776, energy is 1037.1017, rmsd is 22.05721
sib.fastconf.EADock3: Minimizing binding mode 2777, energy is 1037.7819, rmsd is 22.966995
sib.fastconf.EADock3: Minimizing binding mode 2778, energy is 1038.0155, rmsd is 54.259228
sib.fastconf.EADock3: Minimizing binding mode 2779, energy is 1038.1674, rmsd is 2.7464507
sib.fastconf.EADock3: Minimizing binding mode 2780, energy is 1038.3588, rmsd is 53.242744
sib.fastconf.EADock3: Minimizing binding mode 2781, energy is 1038.6854, rmsd is 45.613415
sib.fastconf.EADock3: Minimizing binding mode 2782, energy is 1039.0638, rmsd is 22.749228
sib.fastconf.EADock3: Minimizing binding mode 2783, energy is 1040.3818, rmsd is 21.537395
sib.fastconf.EADock3: Minimizing binding mode 2784, energy is 1040.57, rmsd is 35.538727
sib.fastconf.EADock3: Minimizing binding mode 2785, energy is 1041.7303, rmsd is 49.87535
sib.fastconf.EADock3: Minimizing binding mode 2786, energy is 1041.8125, rmsd is 37.628727
sib.fastconf.EADock3: Minimizing binding mode 2787, energy is 1042.4696, rmsd is 24.014238
sib.fastconf.EADock3: Minimizing binding mode 2788, energy is 1042.5034, rmsd is 26.468626
sib.fastconf.EADock3: Minimizing binding mode 2789, energy is 1042.8696, rmsd is 44.220413
sib.fastconf.EADock3: Minimizing binding mode 2790, energy is 1043.4364, rmsd is 33.97247
sib.fastconf.EADock3: Minimizing binding mode 2791, energy is 1043.4927, rmsd is 46.95767
sib.fastconf.EADock3: Minimizing binding mode 2792, energy is 1043.7863, rmsd is 34.981014
sib.fastconf.EADock3: Minimizing binding mode 2793, energy is 1044.7239, rmsd is 43.336864
sib.fastconf.EADock3: Minimizing binding mode 2794, energy is 1045.9191, rmsd is 45.51058
sib.fastconf.EADock3: Minimizing binding mode 2795, energy is 1046.3369, rmsd is 25.362263
sib.fastconf.EADock3: Minimizing binding mode 2796, energy is 1046.3652, rmsd is 1.4671081
sib.fastconf.EADock3: Minimizing binding mode 2797, energy is 1046.5643, rmsd is 54.298817
sib.fastconf.EADock3: Minimizing binding mode 2798, energy is 1047.618, rmsd is 22.064915
sib.fastconf.EADock3: Minimizing binding mode 2799, energy is 1047.9435, rmsd is 27.452023
sib.fastconf.EADock3: Minimizing binding mode 2800, energy is 1048.6436, rmsd is 34.360676
sib.fastconf.EADock3: Minimizing binding mode 2801, energy is 1050.0801, rmsd is 23.258646
sib.fastconf.EADock3: Minimizing binding mode 2802, energy is 1050.6598, rmsd is 23.188877
sib.fastconf.EADock3: Minimizing binding mode 2803, energy is 1051.008, rmsd is 48.27232
sib.fastconf.EADock3: Minimizing binding mode 2804, energy is 1051.5009, rmsd is 41.044662
sib.fastconf.EADock3: Minimizing binding mode 2805, energy is 1051.9545, rmsd is 35.812317
sib.fastconf.EADock3: Minimizing binding mode 2806, energy is 1054.4738, rmsd is 53.248665
sib.fastconf.EADock3: Minimizing binding mode 2807, energy is 1054.4889, rmsd is 26.794174
sib.fastconf.EADock3: Minimizing binding mode 2808, energy is 1054.8137, rmsd is 34.47736
sib.fastconf.EADock3: Minimizing binding mode 2809, energy is 1057.1085, rmsd is 25.519182
sib.fastconf.EADock3: Minimizing binding mode 2810, energy is 1057.625, rmsd is 25.384342
sib.fastconf.EADock3: Minimizing binding mode 2811, energy is 1057.9176, rmsd is 53.53289
sib.fastconf.EADock3: Minimizing binding mode 2812, energy is 1060.8193, rmsd is 45.70687
sib.fastconf.EADock3: Minimizing binding mode 2813, energy is 1060.9385, rmsd is 23.069538
sib.fastconf.EADock3: Minimizing binding mode 2814, energy is 1062.0917, rmsd is 34.264988
sib.fastconf.EADock3: Minimizing binding mode 2815, energy is 1062.6316, rmsd is 43.611034
sib.fastconf.EADock3: Minimizing binding mode 2816, energy is 1063.1678, rmsd is 21.929665
sib.fastconf.EADock3: Minimizing binding mode 2817, energy is 1063.2803, rmsd is 33.256245
sib.fastconf.EADock3: Minimizing binding mode 2818, energy is 1063.5006, rmsd is 3.7639713
sib.fastconf.EADock3: Minimizing binding mode 2819, energy is 1064.4867, rmsd is 43.899662
sib.fastconf.EADock3: Minimizing binding mode 2820, energy is 1066.0101, rmsd is 22.77938
sib.fastconf.EADock3: Minimizing binding mode 2821, energy is 1066.1051, rmsd is 1.4953123
sib.fastconf.EADock3: Minimizing binding mode 2822, energy is 1066.684, rmsd is 25.872179
sib.fastconf.EADock3: Minimizing binding mode 2823, energy is 1069.3926, rmsd is 61.196754
sib.fastconf.EADock3: Minimizing binding mode 2824, energy is 1069.4194, rmsd is 3.0323677
sib.fastconf.EADock3: Minimizing binding mode 2825, energy is 1069.7692, rmsd is 26.736292
sib.fastconf.EADock3: Minimizing binding mode 2826, energy is 1069.8976, rmsd is 22.917568
sib.fastconf.EADock3: Minimizing binding mode 2827, energy is 1071.0247, rmsd is 44.68378
sib.fastconf.EADock3: Minimizing binding mode 2828, energy is 1071.8328, rmsd is 48.98564
sib.fastconf.EADock3: Minimizing binding mode 2829, energy is 1071.9412, rmsd is 26.256495
sib.fastconf.EADock3: Minimizing binding mode 2830, energy is 1073.1493, rmsd is 40.591198
sib.fastconf.EADock3: Minimizing binding mode 2831, energy is 1073.8162, rmsd is 22.745895
sib.fastconf.EADock3: Minimizing binding mode 2832, energy is 1074.0002, rmsd is 23.507915
sib.fastconf.EADock3: Minimizing binding mode 2833, energy is 1074.0725, rmsd is 42.82399
sib.fastconf.EADock3: Minimizing binding mode 2834, energy is 1074.1816, rmsd is 46.99463
sib.fastconf.EADock3: Minimizing binding mode 2835, energy is 1074.2098, rmsd is 54.664158
sib.fastconf.EADock3: Minimizing binding mode 2836, energy is 1074.5797, rmsd is 35.008144
sib.fastconf.EADock3: Minimizing binding mode 2837, energy is 1075.6743, rmsd is 27.56664
sib.fastconf.EADock3: Minimizing binding mode 2838, energy is 1076.2223, rmsd is 36.163113
sib.fastconf.EADock3: Minimizing binding mode 2839, energy is 1077.6122, rmsd is 48.14971
sib.fastconf.EADock3: Minimizing binding mode 2840, energy is 1078.443, rmsd is 52.794693
sib.fastconf.EADock3: Minimizing binding mode 2841, energy is 1080.3868, rmsd is 50.70561
sib.fastconf.EADock3: Minimizing binding mode 2842, energy is 1080.7815, rmsd is 26.179722
sib.fastconf.EADock3: Minimizing binding mode 2843, energy is 1081.8904, rmsd is 54.5223
sib.fastconf.EADock3: Minimizing binding mode 2844, energy is 1082.0026, rmsd is 51.524456
sib.fastconf.EADock3: Minimizing binding mode 2845, energy is 1083.5795, rmsd is 47.903976
sib.fastconf.EADock3: Minimizing binding mode 2846, energy is 1083.9473, rmsd is 53.398262
sib.fastconf.EADock3: Minimizing binding mode 2847, energy is 1084.5509, rmsd is 23.786879
sib.fastconf.EADock3: Minimizing binding mode 2848, energy is 1085.3728, rmsd is 34.200344
sib.fastconf.EADock3: Minimizing binding mode 2849, energy is 1086.3552, rmsd is 50.293125
sib.fastconf.EADock3: Minimizing binding mode 2850, energy is 1087.4397, rmsd is 52.41366
sib.fastconf.EADock3: Minimizing binding mode 2851, energy is 1087.5586, rmsd is 39.90837
sib.fastconf.EADock3: Minimizing binding mode 2852, energy is 1087.8746, rmsd is 50.993137
sib.fastconf.EADock3: Minimizing binding mode 2853, energy is 1088.3657, rmsd is 52.361633
sib.fastconf.EADock3: Minimizing binding mode 2854, energy is 1088.4417, rmsd is 21.370459
sib.fastconf.EADock3: Minimizing binding mode 2855, energy is 1088.5557, rmsd is 49.185764
sib.fastconf.EADock3: Minimizing binding mode 2856, energy is 1089.6893, rmsd is 3.3708029
sib.fastconf.EADock3: Minimizing binding mode 2857, energy is 1090.0178, rmsd is 39.23985
sib.fastconf.EADock3: Minimizing binding mode 2858, energy is 1090.3215, rmsd is 52.32372
sib.fastconf.EADock3: Minimizing binding mode 2859, energy is 1090.4622, rmsd is 23.20091
sib.fastconf.EADock3: Minimizing binding mode 2860, energy is 1090.6458, rmsd is 47.887306
sib.fastconf.EADock3: Minimizing binding mode 2861, energy is 1091.2633, rmsd is 34.723167
sib.fastconf.EADock3: Minimizing binding mode 2862, energy is 1091.9178, rmsd is 24.647556
sib.fastconf.EADock3: Minimizing binding mode 2863, energy is 1094.5314, rmsd is 26.27966
sib.fastconf.EADock3: Minimizing binding mode 2864, energy is 1094.6483, rmsd is 36.214596
sib.fastconf.EADock3: Minimizing binding mode 2865, energy is 1095.1414, rmsd is 51.742954
sib.fastconf.EADock3: Minimizing binding mode 2866, energy is 1095.7804, rmsd is 23.877409
sib.fastconf.EADock3: Minimizing binding mode 2867, energy is 1096.1515, rmsd is 49.469906
sib.fastconf.EADock3: Minimizing binding mode 2868, energy is 1097.6449, rmsd is 42.43613
sib.fastconf.EADock3: Minimizing binding mode 2869, energy is 1097.9246, rmsd is 21.277372
sib.fastconf.EADock3: Minimizing binding mode 2870, energy is 1099.3217, rmsd is 48.521393
sib.fastconf.EADock3: Minimizing binding mode 2871, energy is 1100.0199, rmsd is 24.87294
sib.fastconf.EADock3: Minimizing binding mode 2872, energy is 1100.4392, rmsd is 24.826593
sib.fastconf.EADock3: Minimizing binding mode 2873, energy is 1100.7554, rmsd is 2.976625
sib.fastconf.EADock3: Minimizing binding mode 2874, energy is 1101.1776, rmsd is 2.6455429
sib.fastconf.EADock3: Minimizing binding mode 2875, energy is 1101.3218, rmsd is 29.485996
sib.fastconf.EADock3: Minimizing binding mode 2876, energy is 1101.4197, rmsd is 21.690922
sib.fastconf.EADock3: Minimizing binding mode 2877, energy is 1101.7977, rmsd is 3.692208
sib.fastconf.EADock3: Minimizing binding mode 2878, energy is 1101.8746, rmsd is 32.29838
sib.fastconf.EADock3: Minimizing binding mode 2879, energy is 1102.3104, rmsd is 26.33441
sib.fastconf.EADock3: Minimizing binding mode 2880, energy is 1102.5729, rmsd is 19.597906
sib.fastconf.EADock3: Minimizing binding mode 2881, energy is 1103.003, rmsd is 38.083214
sib.fastconf.EADock3: Minimizing binding mode 2882, energy is 1103.192, rmsd is 36.438835
sib.fastconf.EADock3: Minimizing binding mode 2883, energy is 1103.3062, rmsd is 50.662598
sib.fastconf.EADock3: Minimizing binding mode 2884, energy is 1103.542, rmsd is 41.256622
sib.fastconf.EADock3: Minimizing binding mode 2885, energy is 1104.5916, rmsd is 23.574692
sib.fastconf.EADock3: Minimizing binding mode 2886, energy is 1105.1904, rmsd is 23.327007
sib.fastconf.EADock3: Minimizing binding mode 2887, energy is 1106.2484, rmsd is 52.57392
sib.fastconf.EADock3: Minimizing binding mode 2888, energy is 1106.6061, rmsd is 52.082912
sib.fastconf.EADock3: Minimizing binding mode 2889, energy is 1106.6525, rmsd is 36.287365
sib.fastconf.EADock3: Minimizing binding mode 2890, energy is 1106.8088, rmsd is 27.419737
sib.fastconf.EADock3: Minimizing binding mode 2891, energy is 1107.0419, rmsd is 45.66965
sib.fastconf.EADock3: Minimizing binding mode 2892, energy is 1108.6208, rmsd is 48.895035
sib.fastconf.EADock3: Minimizing binding mode 2893, energy is 1109.3092, rmsd is 41.230118
sib.fastconf.EADock3: Minimizing binding mode 2894, energy is 1111.3539, rmsd is 41.73835
sib.fastconf.EADock3: Minimizing binding mode 2895, energy is 1111.3574, rmsd is 37.21857
sib.fastconf.EADock3: Minimizing binding mode 2896, energy is 1111.7327, rmsd is 47.073296
sib.fastconf.EADock3: Minimizing binding mode 2897, energy is 1111.794, rmsd is 52.010674
sib.fastconf.EADock3: Minimizing binding mode 2898, energy is 1114.6384, rmsd is 48.96086
sib.fastconf.EADock3: Minimizing binding mode 2899, energy is 1115.0773, rmsd is 35.195225
sib.fastconf.EADock3: Minimizing binding mode 2900, energy is 1115.5243, rmsd is 21.036922
sib.fastconf.EADock3: Minimizing binding mode 2901, energy is 1116.1664, rmsd is 36.24087
sib.fastconf.EADock3: Minimizing binding mode 2902, energy is 1116.9241, rmsd is 35.258137
sib.fastconf.EADock3: Minimizing binding mode 2903, energy is 1116.9872, rmsd is 51.669266
sib.fastconf.EADock3: Minimizing binding mode 2904, energy is 1119.4431, rmsd is 21.372766
sib.fastconf.EADock3: Minimizing binding mode 2905, energy is 1119.5619, rmsd is 41.880493
sib.fastconf.EADock3: Minimizing binding mode 2906, energy is 1119.6515, rmsd is 36.099
sib.fastconf.EADock3: Minimizing binding mode 2907, energy is 1120.773, rmsd is 23.595741
sib.fastconf.EADock3: Minimizing binding mode 2908, energy is 1122.274, rmsd is 43.39942
sib.fastconf.EADock3: Minimizing binding mode 2909, energy is 1122.9006, rmsd is 34.37357
sib.fastconf.EADock3: Minimizing binding mode 2910, energy is 1123.3198, rmsd is 28.9743
sib.fastconf.EADock3: Minimizing binding mode 2911, energy is 1123.3445, rmsd is 41.636166
sib.fastconf.EADock3: Minimizing binding mode 2912, energy is 1124.0853, rmsd is 36.087246
sib.fastconf.EADock3: Minimizing binding mode 2913, energy is 1124.8214, rmsd is 50.070705
sib.fastconf.EADock3: Minimizing binding mode 2914, energy is 1126.1798, rmsd is 40.952755
sib.fastconf.EADock3: Minimizing binding mode 2915, energy is 1127.0729, rmsd is 42.721165
sib.fastconf.EADock3: Minimizing binding mode 2916, energy is 1127.5073, rmsd is 34.246887
sib.fastconf.EADock3: Minimizing binding mode 2917, energy is 1127.6326, rmsd is 44.865852
sib.fastconf.EADock3: Minimizing binding mode 2918, energy is 1128.1912, rmsd is 35.21774
sib.fastconf.EADock3: Minimizing binding mode 2919, energy is 1128.4333, rmsd is 61.987278
sib.fastconf.EADock3: Minimizing binding mode 2920, energy is 1128.4521, rmsd is 38.943333
sib.fastconf.EADock3: Minimizing binding mode 2921, energy is 1130.283, rmsd is 52.7146
sib.fastconf.EADock3: Minimizing binding mode 2922, energy is 1130.6227, rmsd is 33.827156
sib.fastconf.EADock3: Minimizing binding mode 2923, energy is 1130.8209, rmsd is 42.730045
sib.fastconf.EADock3: Minimizing binding mode 2924, energy is 1131.2589, rmsd is 38.20898
sib.fastconf.EADock3: Minimizing binding mode 2925, energy is 1131.7825, rmsd is 40.221672
sib.fastconf.EADock3: Minimizing binding mode 2926, energy is 1132.7673, rmsd is 29.088446
sib.fastconf.EADock3: Minimizing binding mode 2927, energy is 1133.2145, rmsd is 25.785563
sib.fastconf.EADock3: Minimizing binding mode 2928, energy is 1133.2644, rmsd is 23.515993
sib.fastconf.EADock3: Minimizing binding mode 2929, energy is 1133.7653, rmsd is 33.46433
sib.fastconf.EADock3: Minimizing binding mode 2930, energy is 1133.8115, rmsd is 46.10148
sib.fastconf.EADock3: Minimizing binding mode 2931, energy is 1134.8809, rmsd is 43.846893
sib.fastconf.EADock3: Minimizing binding mode 2932, energy is 1135.1664, rmsd is 23.052221
sib.fastconf.EADock3: Minimizing binding mode 2933, energy is 1135.3477, rmsd is 3.5908096
sib.fastconf.EADock3: Minimizing binding mode 2934, energy is 1135.5786, rmsd is 26.519451
sib.fastconf.EADock3: Minimizing binding mode 2935, energy is 1135.808, rmsd is 35.970356
sib.fastconf.EADock3: Minimizing binding mode 2936, energy is 1135.9144, rmsd is 27.167044
sib.fastconf.EADock3: Minimizing binding mode 2937, energy is 1136.3125, rmsd is 22.49545
sib.fastconf.EADock3: Minimizing binding mode 2938, energy is 1136.5692, rmsd is 52.23534
sib.fastconf.EADock3: Minimizing binding mode 2939, energy is 1138.8347, rmsd is 48.93069
sib.fastconf.EADock3: Minimizing binding mode 2940, energy is 1140.2993, rmsd is 42.009304
sib.fastconf.EADock3: Minimizing binding mode 2941, energy is 1140.6659, rmsd is 1.9305155
sib.fastconf.EADock3: Minimizing binding mode 2942, energy is 1142.6353, rmsd is 43.357464
sib.fastconf.EADock3: Minimizing binding mode 2943, energy is 1143.0217, rmsd is 3.1260686
sib.fastconf.EADock3: Minimizing binding mode 2944, energy is 1143.2002, rmsd is 42.54459
sib.fastconf.EADock3: Minimizing binding mode 2945, energy is 1143.8364, rmsd is 27.184603
sib.fastconf.EADock3: Minimizing binding mode 2946, energy is 1144.4487, rmsd is 46.2882
sib.fastconf.EADock3: Minimizing binding mode 2947, energy is 1145.3783, rmsd is 1.9578729
sib.fastconf.EADock3: Minimizing binding mode 2948, energy is 1147.6343, rmsd is 47.200676
sib.fastconf.EADock3: Minimizing binding mode 2949, energy is 1147.9169, rmsd is 36.43466
sib.fastconf.EADock3: Minimizing binding mode 2950, energy is 1148.6349, rmsd is 46.824375
sib.fastconf.EADock3: Minimizing binding mode 2951, energy is 1148.9653, rmsd is 34.523556
sib.fastconf.EADock3: Minimizing binding mode 2952, energy is 1149.0369, rmsd is 52.508045
sib.fastconf.EADock3: Minimizing binding mode 2953, energy is 1149.181, rmsd is 54.93759
sib.fastconf.EADock3: Minimizing binding mode 2954, energy is 1150.138, rmsd is 37.647015
sib.fastconf.EADock3: Minimizing binding mode 2955, energy is 1150.7568, rmsd is 47.763126
sib.fastconf.EADock3: Minimizing binding mode 2956, energy is 1151.0192, rmsd is 39.5829
sib.fastconf.EADock3: Minimizing binding mode 2957, energy is 1152.9528, rmsd is 47.174793
sib.fastconf.EADock3: Minimizing binding mode 2958, energy is 1153.478, rmsd is 20.709274
sib.fastconf.EADock3: Minimizing binding mode 2959, energy is 1154.0503, rmsd is 27.496597
sib.fastconf.EADock3: Minimizing binding mode 2960, energy is 1155.0759, rmsd is 21.477596
sib.fastconf.EADock3: Minimizing binding mode 2961, energy is 1156.5736, rmsd is 39.509068
sib.fastconf.EADock3: Minimizing binding mode 2962, energy is 1158.9398, rmsd is 2.6944792
sib.fastconf.EADock3: Minimizing binding mode 2963, energy is 1161.5159, rmsd is 26.693106
sib.fastconf.EADock3: Minimizing binding mode 2964, energy is 1162.2308, rmsd is 53.907864
sib.fastconf.EADock3: Minimizing binding mode 2965, energy is 1164.7716, rmsd is 40.65609
sib.fastconf.EADock3: Minimizing binding mode 2966, energy is 1165.3813, rmsd is 28.098751
sib.fastconf.EADock3: Minimizing binding mode 2967, energy is 1165.9995, rmsd is 35.94336
sib.fastconf.EADock3: Minimizing binding mode 2968, energy is 1167.4886, rmsd is 36.830418
sib.fastconf.EADock3: Minimizing binding mode 2969, energy is 1169.0558, rmsd is 22.515434
sib.fastconf.EADock3: Minimizing binding mode 2970, energy is 1169.5117, rmsd is 45.07679
sib.fastconf.EADock3: Minimizing binding mode 2971, energy is 1169.8281, rmsd is 20.761293
sib.fastconf.EADock3: Minimizing binding mode 2972, energy is 1170.1825, rmsd is 48.00691
sib.fastconf.EADock3: Minimizing binding mode 2973, energy is 1170.9911, rmsd is 34.054405
sib.fastconf.EADock3: Minimizing binding mode 2974, energy is 1171.0195, rmsd is 48.53843
sib.fastconf.EADock3: Minimizing binding mode 2975, energy is 1171.0706, rmsd is 39.072163
sib.fastconf.EADock3: Minimizing binding mode 2976, energy is 1172.4978, rmsd is 52.16313
sib.fastconf.EADock3: Minimizing binding mode 2977, energy is 1172.9524, rmsd is 22.41348
sib.fastconf.EADock3: Minimizing binding mode 2978, energy is 1172.9678, rmsd is 34.603573
sib.fastconf.EADock3: Minimizing binding mode 2979, energy is 1174.5593, rmsd is 53.218174
sib.fastconf.EADock3: Minimizing binding mode 2980, energy is 1174.9829, rmsd is 32.2754
sib.fastconf.EADock3: Minimizing binding mode 2981, energy is 1175.4188, rmsd is 3.3986564
sib.fastconf.EADock3: Minimizing binding mode 2982, energy is 1176.3627, rmsd is 2.76726
sib.fastconf.EADock3: Minimizing binding mode 2983, energy is 1177.5948, rmsd is 20.393568
sib.fastconf.EADock3: Minimizing binding mode 2984, energy is 1177.6576, rmsd is 52.739105
sib.fastconf.EADock3: Minimizing binding mode 2985, energy is 1179.6575, rmsd is 21.626547
sib.fastconf.EADock3: Minimizing binding mode 2986, energy is 1182.5693, rmsd is 49.927727
sib.fastconf.EADock3: Minimizing binding mode 2987, energy is 1183.2919, rmsd is 49.677376
sib.fastconf.EADock3: Minimizing binding mode 2988, energy is 1184.1774, rmsd is 38.482296
sib.fastconf.EADock3: Minimizing binding mode 2989, energy is 1185.8203, rmsd is 49.80527
sib.fastconf.EADock3: Minimizing binding mode 2990, energy is 1186.0881, rmsd is 49.280098
sib.fastconf.EADock3: Minimizing binding mode 2991, energy is 1188.5424, rmsd is 35.676407
sib.fastconf.EADock3: Minimizing binding mode 2992, energy is 1189.499, rmsd is 3.5886328
sib.fastconf.EADock3: Minimizing binding mode 2993, energy is 1189.7714, rmsd is 25.16924
sib.fastconf.EADock3: Minimizing binding mode 2994, energy is 1190.5321, rmsd is 52.987926
sib.fastconf.EADock3: Minimizing binding mode 2995, energy is 1190.6807, rmsd is 52.508427
sib.fastconf.EADock3: Minimizing binding mode 2996, energy is 1191.0586, rmsd is 54.339245
sib.fastconf.EADock3: Minimizing binding mode 2997, energy is 1191.3999, rmsd is 49.017483
sib.fastconf.EADock3: Minimizing binding mode 2998, energy is 1191.4851, rmsd is 42.967968
sib.fastconf.EADock3: Minimizing binding mode 2999, energy is 1191.9824, rmsd is 20.874554
sib.fastconf.EADock3: Minimizing binding mode 3000, energy is 1192.3158, rmsd is 23.036663
sib.fastconf.EADock3: Minimizing binding mode 3001, energy is 1192.8278, rmsd is 3.2196708
sib.fastconf.EADock3: Minimizing binding mode 3002, energy is 1193.9813, rmsd is 36.489426
sib.fastconf.EADock3: Minimizing binding mode 3003, energy is 1194.1702, rmsd is 2.1924505
sib.fastconf.EADock3: Minimizing binding mode 3004, energy is 1194.2671, rmsd is 24.563803
sib.fastconf.EADock3: Minimizing binding mode 3005, energy is 1195.3876, rmsd is 31.977415
sib.fastconf.EADock3: Minimizing binding mode 3006, energy is 1195.6317, rmsd is 35.95487
sib.fastconf.EADock3: Minimizing binding mode 3007, energy is 1195.9146, rmsd is 62.09734
sib.fastconf.EADock3: Minimizing binding mode 3008, energy is 1196.2028, rmsd is 63.889294
sib.fastconf.EADock3: Minimizing binding mode 3009, energy is 1198.471, rmsd is 37.433434
sib.fastconf.EADock3: Minimizing binding mode 3010, energy is 1198.6276, rmsd is 28.74682
sib.fastconf.EADock3: Minimizing binding mode 3011, energy is 1199.0297, rmsd is 37.666664
sib.fastconf.EADock3: Minimizing binding mode 3012, energy is 1200.12, rmsd is 35.807407
sib.fastconf.EADock3: Minimizing binding mode 3013, energy is 1202.2413, rmsd is 43.36841
sib.fastconf.EADock3: Minimizing binding mode 3014, energy is 1203.2245, rmsd is 40.96386
sib.fastconf.EADock3: Minimizing binding mode 3015, energy is 1204.249, rmsd is 23.530525
sib.fastconf.EADock3: Minimizing binding mode 3016, energy is 1204.5728, rmsd is 23.34187
sib.fastconf.EADock3: Minimizing binding mode 3017, energy is 1206.9568, rmsd is 3.3881521
sib.fastconf.EADock3: Minimizing binding mode 3018, energy is 1207.5135, rmsd is 50.70214
sib.fastconf.EADock3: Minimizing binding mode 3019, energy is 1208.3552, rmsd is 47.298126
sib.fastconf.EADock3: Minimizing binding mode 3020, energy is 1208.9956, rmsd is 55.578693
sib.fastconf.EADock3: Minimizing binding mode 3021, energy is 1209.1528, rmsd is 34.273174
sib.fastconf.EADock3: Minimizing binding mode 3022, energy is 1210.1725, rmsd is 37.95885
sib.fastconf.EADock3: Minimizing binding mode 3023, energy is 1210.248, rmsd is 49.172733
sib.fastconf.EADock3: Minimizing binding mode 3024, energy is 1210.7075, rmsd is 50.7009
sib.fastconf.EADock3: Minimizing binding mode 3025, energy is 1211.0339, rmsd is 52.39566
sib.fastconf.EADock3: Minimizing binding mode 3026, energy is 1211.052, rmsd is 29.759354
sib.fastconf.EADock3: Minimizing binding mode 3027, energy is 1211.0574, rmsd is 28.56203
sib.fastconf.EADock3: Minimizing binding mode 3028, energy is 1211.3716, rmsd is 40.137993
sib.fastconf.EADock3: Minimizing binding mode 3029, energy is 1211.4167, rmsd is 41.88024
sib.fastconf.EADock3: Minimizing binding mode 3030, energy is 1211.491, rmsd is 21.871447
sib.fastconf.EADock3: Minimizing binding mode 3031, energy is 1212.9224, rmsd is 21.192297
sib.fastconf.EADock3: Minimizing binding mode 3032, energy is 1214.9624, rmsd is 46.07056
sib.fastconf.EADock3: Minimizing binding mode 3033, energy is 1215.2069, rmsd is 48.548527
sib.fastconf.EADock3: Minimizing binding mode 3034, energy is 1216.1522, rmsd is 36.245148
sib.fastconf.EADock3: Minimizing binding mode 3035, energy is 1217.0281, rmsd is 21.413994
sib.fastconf.EADock3: Minimizing binding mode 3036, energy is 1217.3275, rmsd is 20.340227
sib.fastconf.EADock3: Minimizing binding mode 3037, energy is 1217.6749, rmsd is 37.188457
sib.fastconf.EADock3: Minimizing binding mode 3038, energy is 1224.0406, rmsd is 21.259405
sib.fastconf.EADock3: Minimizing binding mode 3039, energy is 1224.6213, rmsd is 21.547796
sib.fastconf.EADock3: Minimizing binding mode 3040, energy is 1224.7922, rmsd is 49.02285
sib.fastconf.EADock3: Minimizing binding mode 3041, energy is 1225.3052, rmsd is 45.08525
sib.fastconf.EADock3: Minimizing binding mode 3042, energy is 1225.8442, rmsd is 60.891705
sib.fastconf.EADock3: Minimizing binding mode 3043, energy is 1226.3783, rmsd is 52.527657
sib.fastconf.EADock3: Minimizing binding mode 3044, energy is 1226.6014, rmsd is 24.91556
sib.fastconf.EADock3: Minimizing binding mode 3045, energy is 1227.5348, rmsd is 38.45953
sib.fastconf.EADock3: Minimizing binding mode 3046, energy is 1227.992, rmsd is 3.184277
sib.fastconf.EADock3: Minimizing binding mode 3047, energy is 1228.1516, rmsd is 35.586906
sib.fastconf.EADock3: Minimizing binding mode 3048, energy is 1231.0543, rmsd is 28.299778
sib.fastconf.EADock3: Minimizing binding mode 3049, energy is 1232.0266, rmsd is 48.357372
sib.fastconf.EADock3: Minimizing binding mode 3050, energy is 1233.4327, rmsd is 24.263172
sib.fastconf.EADock3: Minimizing binding mode 3051, energy is 1233.527, rmsd is 53.342945
sib.fastconf.EADock3: Minimizing binding mode 3052, energy is 1235.7234, rmsd is 44.9238
sib.fastconf.EADock3: Minimizing binding mode 3053, energy is 1236.8007, rmsd is 47.805687
sib.fastconf.EADock3: Minimizing binding mode 3054, energy is 1236.9419, rmsd is 47.928375
sib.fastconf.EADock3: Minimizing binding mode 3055, energy is 1236.9745, rmsd is 38.76177
sib.fastconf.EADock3: Minimizing binding mode 3056, energy is 1240.886, rmsd is 21.790844
sib.fastconf.EADock3: Minimizing binding mode 3057, energy is 1242.0128, rmsd is 41.270073
sib.fastconf.EADock3: Minimizing binding mode 3058, energy is 1242.3369, rmsd is 39.0715
sib.fastconf.EADock3: Minimizing binding mode 3059, energy is 1243.2668, rmsd is 42.312855
sib.fastconf.EADock3: Minimizing binding mode 3060, energy is 1243.8423, rmsd is 41.944065
sib.fastconf.EADock3: Minimizing binding mode 3061, energy is 1244.463, rmsd is 47.609535
sib.fastconf.EADock3: Minimizing binding mode 3062, energy is 1244.6458, rmsd is 21.587427
sib.fastconf.EADock3: Minimizing binding mode 3063, energy is 1244.8905, rmsd is 33.825756
sib.fastconf.EADock3: Minimizing binding mode 3064, energy is 1245.667, rmsd is 54.580894
sib.fastconf.EADock3: Minimizing binding mode 3065, energy is 1246.6354, rmsd is 38.177124
sib.fastconf.EADock3: Minimizing binding mode 3066, energy is 1248.0238, rmsd is 28.784506
sib.fastconf.EADock3: Minimizing binding mode 3067, energy is 1248.0779, rmsd is 37.727203
sib.fastconf.EADock3: Minimizing binding mode 3068, energy is 1248.8474, rmsd is 39.839935
sib.fastconf.EADock3: Minimizing binding mode 3069, energy is 1249.0837, rmsd is 54.589703
sib.fastconf.EADock3: Minimizing binding mode 3070, energy is 1249.5525, rmsd is 2.9908252
sib.fastconf.EADock3: Minimizing binding mode 3071, energy is 1249.5876, rmsd is 49.313828
sib.fastconf.EADock3: Minimizing binding mode 3072, energy is 1250.697, rmsd is 21.504223
sib.fastconf.EADock3: Minimizing binding mode 3073, energy is 1251.1118, rmsd is 36.365788
sib.fastconf.EADock3: Minimizing binding mode 3074, energy is 1251.8529, rmsd is 28.22176
sib.fastconf.EADock3: Minimizing binding mode 3075, energy is 1252.385, rmsd is 27.14603
sib.fastconf.EADock3: Minimizing binding mode 3076, energy is 1253.7902, rmsd is 45.960217
sib.fastconf.EADock3: Minimizing binding mode 3077, energy is 1253.8807, rmsd is 48.70596
sib.fastconf.EADock3: Minimizing binding mode 3078, energy is 1253.9755, rmsd is 39.665684
sib.fastconf.EADock3: Minimizing binding mode 3079, energy is 1255.1492, rmsd is 21.318932
sib.fastconf.EADock3: Minimizing binding mode 3080, energy is 1255.3894, rmsd is 52.48154
sib.fastconf.EADock3: Minimizing binding mode 3081, energy is 1255.7097, rmsd is 49.379635
sib.fastconf.EADock3: Minimizing binding mode 3082, energy is 1256.0992, rmsd is 2.3585844
sib.fastconf.EADock3: Minimizing binding mode 3083, energy is 1257.6211, rmsd is 29.479599
sib.fastconf.EADock3: Minimizing binding mode 3084, energy is 1259.018, rmsd is 37.123703
sib.fastconf.EADock3: Minimizing binding mode 3085, energy is 1259.3542, rmsd is 18.785418
sib.fastconf.EADock3: Minimizing binding mode 3086, energy is 1260.8684, rmsd is 50.82207
sib.fastconf.EADock3: Minimizing binding mode 3087, energy is 1261.0591, rmsd is 54.182156
sib.fastconf.EADock3: Minimizing binding mode 3088, energy is 1261.9827, rmsd is 43.523357
sib.fastconf.EADock3: Minimizing binding mode 3089, energy is 1262.4895, rmsd is 48.19251
sib.fastconf.EADock3: Minimizing binding mode 3090, energy is 1262.5194, rmsd is 17.877272
sib.fastconf.EADock3: Minimizing binding mode 3091, energy is 1262.9911, rmsd is 38.2125
sib.fastconf.EADock3: Minimizing binding mode 3092, energy is 1263.8604, rmsd is 44.990273
sib.fastconf.EADock3: Minimizing binding mode 3093, energy is 1264.5762, rmsd is 54.254696
sib.fastconf.EADock3: Minimizing binding mode 3094, energy is 1265.0071, rmsd is 25.406456
sib.fastconf.EADock3: Minimizing binding mode 3095, energy is 1265.2997, rmsd is 23.791317
sib.fastconf.EADock3: Minimizing binding mode 3096, energy is 1266.4485, rmsd is 49.449646
sib.fastconf.EADock3: Minimizing binding mode 3097, energy is 1267.2468, rmsd is 36.144444
sib.fastconf.EADock3: Minimizing binding mode 3098, energy is 1268.5635, rmsd is 23.52327
sib.fastconf.EADock3: Minimizing binding mode 3099, energy is 1268.9703, rmsd is 25.411411
sib.fastconf.EADock3: Minimizing binding mode 3100, energy is 1269.8059, rmsd is 48.999744
sib.fastconf.EADock3: Minimizing binding mode 3101, energy is 1270.1255, rmsd is 50.013695
sib.fastconf.EADock3: Minimizing binding mode 3102, energy is 1271.4673, rmsd is 34.353634
sib.fastconf.EADock3: Minimizing binding mode 3103, energy is 1272.4783, rmsd is 48.682983
sib.fastconf.EADock3: Minimizing binding mode 3104, energy is 1274.4514, rmsd is 26.043522
sib.fastconf.EADock3: Minimizing binding mode 3105, energy is 1275.1335, rmsd is 53.73706
sib.fastconf.EADock3: Minimizing binding mode 3106, energy is 1275.3632, rmsd is 50.49951
sib.fastconf.EADock3: Minimizing binding mode 3107, energy is 1275.8889, rmsd is 26.304722
sib.fastconf.EADock3: Minimizing binding mode 3108, energy is 1279.3275, rmsd is 24.613712
sib.fastconf.EADock3: Minimizing binding mode 3109, energy is 1279.4904, rmsd is 48.904987
sib.fastconf.EADock3: Minimizing binding mode 3110, energy is 1279.5874, rmsd is 39.80613
sib.fastconf.EADock3: Minimizing binding mode 3111, energy is 1280.5813, rmsd is 47.821102
sib.fastconf.EADock3: Minimizing binding mode 3112, energy is 1283.4071, rmsd is 26.341246
sib.fastconf.EADock3: Minimizing binding mode 3113, energy is 1284.7548, rmsd is 22.042145
sib.fastconf.EADock3: Minimizing binding mode 3114, energy is 1284.8219, rmsd is 25.013453
sib.fastconf.EADock3: Minimizing binding mode 3115, energy is 1285.6028, rmsd is 38.68138
sib.fastconf.EADock3: Minimizing binding mode 3116, energy is 1286.3574, rmsd is 51.088863
sib.fastconf.EADock3: Minimizing binding mode 3117, energy is 1287.645, rmsd is 26.639273
sib.fastconf.EADock3: Minimizing binding mode 3118, energy is 1287.776, rmsd is 23.129086
sib.fastconf.EADock3: Minimizing binding mode 3119, energy is 1288.0007, rmsd is 41.901722
sib.fastconf.EADock3: Minimizing binding mode 3120, energy is 1288.5417, rmsd is 22.723421
sib.fastconf.EADock3: Minimizing binding mode 3121, energy is 1288.7571, rmsd is 29.631096
sib.fastconf.EADock3: Minimizing binding mode 3122, energy is 1288.9866, rmsd is 25.400364
sib.fastconf.EADock3: Minimizing binding mode 3123, energy is 1290.0481, rmsd is 2.123005
sib.fastconf.EADock3: Minimizing binding mode 3124, energy is 1291.8716, rmsd is 33.206367
sib.fastconf.EADock3: Minimizing binding mode 3125, energy is 1291.9081, rmsd is 21.773647
sib.fastconf.EADock3: Minimizing binding mode 3126, energy is 1292.1454, rmsd is 28.287275
sib.fastconf.EADock3: Minimizing binding mode 3127, energy is 1293.0725, rmsd is 48.148376
sib.fastconf.EADock3: Minimizing binding mode 3128, energy is 1294.515, rmsd is 41.188618
sib.fastconf.EADock3: Minimizing binding mode 3129, energy is 1294.8202, rmsd is 27.692554
sib.fastconf.EADock3: Minimizing binding mode 3130, energy is 1298.0071, rmsd is 23.774754
sib.fastconf.EADock3: Minimizing binding mode 3131, energy is 1298.7463, rmsd is 47.108967
sib.fastconf.EADock3: Minimizing binding mode 3132, energy is 1299.1226, rmsd is 35.698353
sib.fastconf.EADock3: Minimizing binding mode 3133, energy is 1299.4408, rmsd is 34.926517
sib.fastconf.EADock3: Minimizing binding mode 3134, energy is 1299.5936, rmsd is 42.8171
sib.fastconf.EADock3: Minimizing binding mode 3135, energy is 1299.6761, rmsd is 52.17196
sib.fastconf.EADock3: Minimizing binding mode 3136, energy is 1305.4087, rmsd is 37.33654
sib.fastconf.EADock3: Minimizing binding mode 3137, energy is 1308.3492, rmsd is 20.633923
sib.fastconf.EADock3: Minimizing binding mode 3138, energy is 1308.4028, rmsd is 25.38461
sib.fastconf.EADock3: Minimizing binding mode 3139, energy is 1308.8573, rmsd is 56.667305
sib.fastconf.EADock3: Minimizing binding mode 3140, energy is 1309.9885, rmsd is 35.476013
sib.fastconf.EADock3: Minimizing binding mode 3141, energy is 1310.2161, rmsd is 20.453611
sib.fastconf.EADock3: Minimizing binding mode 3142, energy is 1311.6246, rmsd is 23.736006
sib.fastconf.EADock3: Minimizing binding mode 3143, energy is 1311.6613, rmsd is 21.340454
sib.fastconf.EADock3: Minimizing binding mode 3144, energy is 1313.987, rmsd is 50.49184
sib.fastconf.EADock3: Minimizing binding mode 3145, energy is 1314.9945, rmsd is 51.621574
sib.fastconf.EADock3: Minimizing binding mode 3146, energy is 1316.4679, rmsd is 40.51473
sib.fastconf.EADock3: Minimizing binding mode 3147, energy is 1320.9575, rmsd is 2.0118139
sib.fastconf.EADock3: Minimizing binding mode 3148, energy is 1322.2107, rmsd is 2.4140425
sib.fastconf.EADock3: Minimizing binding mode 3149, energy is 1322.619, rmsd is 51.519104
sib.fastconf.EADock3: Minimizing binding mode 3150, energy is 1323.6423, rmsd is 38.924473
sib.fastconf.EADock3: Minimizing binding mode 3151, energy is 1325.2822, rmsd is 25.321796
sib.fastconf.EADock3: Minimizing binding mode 3152, energy is 1325.4877, rmsd is 42.38799
sib.fastconf.EADock3: Minimizing binding mode 3153, energy is 1327.134, rmsd is 50.083435
sib.fastconf.EADock3: Minimizing binding mode 3154, energy is 1327.1539, rmsd is 36.1566
sib.fastconf.EADock3: Minimizing binding mode 3155, energy is 1331.3312, rmsd is 41.719215
sib.fastconf.EADock3: Minimizing binding mode 3156, energy is 1332.6409, rmsd is 52.35809
sib.fastconf.EADock3: Minimizing binding mode 3157, energy is 1332.7468, rmsd is 47.363583
sib.fastconf.EADock3: Minimizing binding mode 3158, energy is 1333.8684, rmsd is 3.4127338
sib.fastconf.EADock3: Minimizing binding mode 3159, energy is 1334.9258, rmsd is 27.879354
sib.fastconf.EADock3: Minimizing binding mode 3160, energy is 1335.2561, rmsd is 23.641361
sib.fastconf.EADock3: Minimizing binding mode 3161, energy is 1337.3057, rmsd is 51.205708
sib.fastconf.EADock3: Minimizing binding mode 3162, energy is 1338.8069, rmsd is 28.315668
sib.fastconf.EADock3: Minimizing binding mode 3163, energy is 1340.6624, rmsd is 52.898705
sib.fastconf.EADock3: Minimizing binding mode 3164, energy is 1341.4292, rmsd is 36.63155
sib.fastconf.EADock3: Minimizing binding mode 3165, energy is 1342.8837, rmsd is 22.850164
sib.fastconf.EADock3: Minimizing binding mode 3166, energy is 1343.6915, rmsd is 21.479319
sib.fastconf.EADock3: Minimizing binding mode 3167, energy is 1345.2218, rmsd is 46.578617
sib.fastconf.EADock3: Minimizing binding mode 3168, energy is 1345.7954, rmsd is 53.91693
sib.fastconf.EADock3: Minimizing binding mode 3169, energy is 1346.2295, rmsd is 42.857254
sib.fastconf.EADock3: Minimizing binding mode 3170, energy is 1346.8748, rmsd is 50.085552
sib.fastconf.EADock3: Minimizing binding mode 3171, energy is 1347.8107, rmsd is 29.933245
sib.fastconf.EADock3: Minimizing binding mode 3172, energy is 1348.064, rmsd is 45.110905
sib.fastconf.EADock3: Minimizing binding mode 3173, energy is 1349.8407, rmsd is 39.620583
sib.fastconf.EADock3: Minimizing binding mode 3174, energy is 1354.9651, rmsd is 49.470226
sib.fastconf.EADock3: Minimizing binding mode 3175, energy is 1355.2999, rmsd is 23.958832
sib.fastconf.EADock3: Minimizing binding mode 3176, energy is 1355.5115, rmsd is 51.478798
sib.fastconf.EADock3: Minimizing binding mode 3177, energy is 1356.8567, rmsd is 49.907543
sib.fastconf.EADock3: Minimizing binding mode 3178, energy is 1358.7405, rmsd is 38.393032
sib.fastconf.EADock3: Minimizing binding mode 3179, energy is 1359.291, rmsd is 49.853313
sib.fastconf.EADock3: Minimizing binding mode 3180, energy is 1360.1128, rmsd is 47.99987
sib.fastconf.EADock3: Minimizing binding mode 3181, energy is 1360.1508, rmsd is 22.305244
sib.fastconf.EADock3: Minimizing binding mode 3182, energy is 1362.2422, rmsd is 23.510885
sib.fastconf.EADock3: Minimizing binding mode 3183, energy is 1366.2417, rmsd is 47.762733
sib.fastconf.EADock3: Minimizing binding mode 3184, energy is 1367.3215, rmsd is 3.7602649
sib.fastconf.EADock3: Minimizing binding mode 3185, energy is 1367.571, rmsd is 35.70676
sib.fastconf.EADock3: Minimizing binding mode 3186, energy is 1368.0981, rmsd is 52.970284
sib.fastconf.EADock3: Minimizing binding mode 3187, energy is 1369.2949, rmsd is 51.578033
sib.fastconf.EADock3: Minimizing binding mode 3188, energy is 1371.1002, rmsd is 49.24429
sib.fastconf.EADock3: Minimizing binding mode 3189, energy is 1371.3021, rmsd is 49.375946
sib.fastconf.EADock3: Minimizing binding mode 3190, energy is 1371.8035, rmsd is 19.875769
sib.fastconf.EADock3: Minimizing binding mode 3191, energy is 1373.017, rmsd is 50.141663
sib.fastconf.EADock3: Minimizing binding mode 3192, energy is 1373.0286, rmsd is 22.10347
sib.fastconf.EADock3: Minimizing binding mode 3193, energy is 1376.3519, rmsd is 20.370768
sib.fastconf.EADock3: Minimizing binding mode 3194, energy is 1376.4425, rmsd is 25.723715
sib.fastconf.EADock3: Minimizing binding mode 3195, energy is 1378.0405, rmsd is 28.411146
sib.fastconf.EADock3: Minimizing binding mode 3196, energy is 1378.2656, rmsd is 23.764122
sib.fastconf.EADock3: Minimizing binding mode 3197, energy is 1378.7678, rmsd is 39.855423
sib.fastconf.EADock3: Minimizing binding mode 3198, energy is 1378.8322, rmsd is 33.730198
sib.fastconf.EADock3: Minimizing binding mode 3199, energy is 1379.2288, rmsd is 18.692175
sib.fastconf.EADock3: Minimizing binding mode 3200, energy is 1379.886, rmsd is 36.15034
sib.fastconf.EADock3: Minimizing binding mode 3201, energy is 1380.2546, rmsd is 1.4317936
sib.fastconf.EADock3: Minimizing binding mode 3202, energy is 1381.226, rmsd is 37.53273
sib.fastconf.EADock3: Minimizing binding mode 3203, energy is 1382.3932, rmsd is 52.04107
sib.fastconf.EADock3: Minimizing binding mode 3204, energy is 1383.6985, rmsd is 34.45179
sib.fastconf.EADock3: Minimizing binding mode 3205, energy is 1384.594, rmsd is 36.33846
sib.fastconf.EADock3: Minimizing binding mode 3206, energy is 1384.9258, rmsd is 52.026966
sib.fastconf.EADock3: Minimizing binding mode 3207, energy is 1385.6178, rmsd is 54.082973
sib.fastconf.EADock3: Minimizing binding mode 3208, energy is 1386.864, rmsd is 18.805063
sib.fastconf.EADock3: Minimizing binding mode 3209, energy is 1387.806, rmsd is 37.631508
sib.fastconf.EADock3: Minimizing binding mode 3210, energy is 1388.0531, rmsd is 27.486147
sib.fastconf.EADock3: Minimizing binding mode 3211, energy is 1388.9414, rmsd is 26.057652
sib.fastconf.EADock3: Minimizing binding mode 3212, energy is 1390.4062, rmsd is 35.63386
sib.fastconf.EADock3: Minimizing binding mode 3213, energy is 1392.0586, rmsd is 54.454643
sib.fastconf.EADock3: Minimizing binding mode 3214, energy is 1396.1465, rmsd is 55.52084
sib.fastconf.EADock3: Minimizing binding mode 3215, energy is 1397.4014, rmsd is 20.54201
sib.fastconf.EADock3: Minimizing binding mode 3216, energy is 1398.0977, rmsd is 54.804127
sib.fastconf.EADock3: Minimizing binding mode 3217, energy is 1398.1442, rmsd is 49.7548
sib.fastconf.EADock3: Minimizing binding mode 3218, energy is 1398.5387, rmsd is 38.932407
sib.fastconf.EADock3: Minimizing binding mode 3219, energy is 1400.7146, rmsd is 37.5558
sib.fastconf.EADock3: Minimizing binding mode 3220, energy is 1401.5726, rmsd is 46.452976
sib.fastconf.EADock3: Minimizing binding mode 3221, energy is 1401.978, rmsd is 35.06903
sib.fastconf.EADock3: Minimizing binding mode 3222, energy is 1403.5055, rmsd is 34.516846
sib.fastconf.EADock3: Minimizing binding mode 3223, energy is 1404.2822, rmsd is 27.951124
sib.fastconf.EADock3: Minimizing binding mode 3224, energy is 1404.346, rmsd is 37.636395
sib.fastconf.EADock3: Minimizing binding mode 3225, energy is 1404.7463, rmsd is 39.61174
sib.fastconf.EADock3: Minimizing binding mode 3226, energy is 1404.852, rmsd is 22.294708
sib.fastconf.EADock3: Minimizing binding mode 3227, energy is 1404.948, rmsd is 20.19236
sib.fastconf.EADock3: Minimizing binding mode 3228, energy is 1405.2017, rmsd is 42.270576
sib.fastconf.EADock3: Minimizing binding mode 3229, energy is 1409.021, rmsd is 49.50135
sib.fastconf.EADock3: Minimizing binding mode 3230, energy is 1411.7208, rmsd is 45.81538
sib.fastconf.EADock3: Minimizing binding mode 3231, energy is 1414.5753, rmsd is 22.990776
sib.fastconf.EADock3: Minimizing binding mode 3232, energy is 1414.6462, rmsd is 51.59572
sib.fastconf.EADock3: Minimizing binding mode 3233, energy is 1415.3336, rmsd is 28.583616
sib.fastconf.EADock3: Minimizing binding mode 3234, energy is 1416.2822, rmsd is 54.806507
sib.fastconf.EADock3: Minimizing binding mode 3235, energy is 1418.9838, rmsd is 49.64121
sib.fastconf.EADock3: Minimizing binding mode 3236, energy is 1418.994, rmsd is 46.19003
sib.fastconf.EADock3: Minimizing binding mode 3237, energy is 1419.6356, rmsd is 28.313171
sib.fastconf.EADock3: Minimizing binding mode 3238, energy is 1419.8086, rmsd is 42.965675
sib.fastconf.EADock3: Minimizing binding mode 3239, energy is 1420.2612, rmsd is 55.56165
sib.fastconf.EADock3: Minimizing binding mode 3240, energy is 1420.5493, rmsd is 21.30949
sib.fastconf.EADock3: Minimizing binding mode 3241, energy is 1422.1406, rmsd is 51.84329
sib.fastconf.EADock3: Minimizing binding mode 3242, energy is 1422.5016, rmsd is 34.93223
sib.fastconf.EADock3: Minimizing binding mode 3243, energy is 1424.3706, rmsd is 27.955719
sib.fastconf.EADock3: Minimizing binding mode 3244, energy is 1425.1262, rmsd is 37.20245
sib.fastconf.EADock3: Minimizing binding mode 3245, energy is 1425.2678, rmsd is 34.83277
sib.fastconf.EADock3: Minimizing binding mode 3246, energy is 1425.496, rmsd is 29.364178
sib.fastconf.EADock3: Minimizing binding mode 3247, energy is 1426.0547, rmsd is 28.446613
sib.fastconf.EADock3: Minimizing binding mode 3248, energy is 1428.8331, rmsd is 37.19688
sib.fastconf.EADock3: Minimizing binding mode 3249, energy is 1431.1384, rmsd is 21.462019
sib.fastconf.EADock3: Minimizing binding mode 3250, energy is 1431.7852, rmsd is 49.146515
sib.fastconf.EADock3: Minimizing binding mode 3251, energy is 1432.2035, rmsd is 43.103977
sib.fastconf.EADock3: Minimizing binding mode 3252, energy is 1432.5316, rmsd is 51.258526
sib.fastconf.EADock3: Minimizing binding mode 3253, energy is 1432.671, rmsd is 21.95156
sib.fastconf.EADock3: Minimizing binding mode 3254, energy is 1435.2814, rmsd is 52.88352
sib.fastconf.EADock3: Minimizing binding mode 3255, energy is 1435.5781, rmsd is 45.675323
sib.fastconf.EADock3: Minimizing binding mode 3256, energy is 1438.01, rmsd is 25.533997
sib.fastconf.EADock3: Minimizing binding mode 3257, energy is 1439.0083, rmsd is 52.42245
sib.fastconf.EADock3: Minimizing binding mode 3258, energy is 1439.1781, rmsd is 55.15402
sib.fastconf.EADock3: Minimizing binding mode 3259, energy is 1440.8201, rmsd is 40.48058
sib.fastconf.EADock3: Minimizing binding mode 3260, energy is 1441.0112, rmsd is 36.218388
sib.fastconf.EADock3: Minimizing binding mode 3261, energy is 1441.4839, rmsd is 41.730385
sib.fastconf.EADock3: Minimizing binding mode 3262, energy is 1441.8185, rmsd is 21.84754
sib.fastconf.EADock3: Minimizing binding mode 3263, energy is 1442.1875, rmsd is 21.510355
sib.fastconf.EADock3: Minimizing binding mode 3264, energy is 1443.8018, rmsd is 34.687016
sib.fastconf.EADock3: Minimizing binding mode 3265, energy is 1445.5719, rmsd is 25.874973
sib.fastconf.EADock3: Minimizing binding mode 3266, energy is 1445.6658, rmsd is 52.344467
sib.fastconf.EADock3: Minimizing binding mode 3267, energy is 1445.863, rmsd is 22.42572
sib.fastconf.EADock3: Minimizing binding mode 3268, energy is 1445.9878, rmsd is 52.097763
sib.fastconf.EADock3: Minimizing binding mode 3269, energy is 1446.0795, rmsd is 21.594389
sib.fastconf.EADock3: Minimizing binding mode 3270, energy is 1447.4225, rmsd is 27.388638
sib.fastconf.EADock3: Minimizing binding mode 3271, energy is 1447.4952, rmsd is 48.3419
sib.fastconf.EADock3: Minimizing binding mode 3272, energy is 1448.649, rmsd is 25.652363
sib.fastconf.EADock3: Minimizing binding mode 3273, energy is 1448.6833, rmsd is 52.086025
sib.fastconf.EADock3: Minimizing binding mode 3274, energy is 1449.6075, rmsd is 29.0459
sib.fastconf.EADock3: Minimizing binding mode 3275, energy is 1450.2968, rmsd is 50.560616
sib.fastconf.EADock3: Minimizing binding mode 3276, energy is 1451.0415, rmsd is 52.33602
sib.fastconf.EADock3: Minimizing binding mode 3277, energy is 1451.4696, rmsd is 51.548378
sib.fastconf.EADock3: Minimizing binding mode 3278, energy is 1452.0321, rmsd is 29.394508
sib.fastconf.EADock3: Minimizing binding mode 3279, energy is 1452.8745, rmsd is 36.47228
sib.fastconf.EADock3: Minimizing binding mode 3280, energy is 1452.8973, rmsd is 22.801186
sib.fastconf.EADock3: Minimizing binding mode 3281, energy is 1453.3907, rmsd is 50.418575
sib.fastconf.EADock3: Minimizing binding mode 3282, energy is 1453.796, rmsd is 41.79161
sib.fastconf.EADock3: Minimizing binding mode 3283, energy is 1456.2113, rmsd is 28.115858
sib.fastconf.EADock3: Minimizing binding mode 3284, energy is 1456.9365, rmsd is 36.038887
sib.fastconf.EADock3: Minimizing binding mode 3285, energy is 1457.7028, rmsd is 53.318176
sib.fastconf.EADock3: Minimizing binding mode 3286, energy is 1459.8859, rmsd is 42.30814
sib.fastconf.EADock3: Minimizing binding mode 3287, energy is 1460.9612, rmsd is 50.27776
sib.fastconf.EADock3: Minimizing binding mode 3288, energy is 1461.5387, rmsd is 50.18604
sib.fastconf.EADock3: Minimizing binding mode 3289, energy is 1462.7377, rmsd is 22.899881
sib.fastconf.EADock3: Minimizing binding mode 3290, energy is 1462.8645, rmsd is 39.481693
sib.fastconf.EADock3: Minimizing binding mode 3291, energy is 1463.7788, rmsd is 40.851242
sib.fastconf.EADock3: Minimizing binding mode 3292, energy is 1464.4359, rmsd is 20.274002
sib.fastconf.EADock3: Minimizing binding mode 3293, energy is 1465.179, rmsd is 60.0505
sib.fastconf.EADock3: Minimizing binding mode 3294, energy is 1465.5518, rmsd is 42.781128
sib.fastconf.EADock3: Minimizing binding mode 3295, energy is 1467.5665, rmsd is 34.98231
sib.fastconf.EADock3: Minimizing binding mode 3296, energy is 1467.8059, rmsd is 27.147669
sib.fastconf.EADock3: Minimizing binding mode 3297, energy is 1467.8225, rmsd is 48.307777
sib.fastconf.EADock3: Minimizing binding mode 3298, energy is 1469.1499, rmsd is 40.025524
sib.fastconf.EADock3: Minimizing binding mode 3299, energy is 1469.6776, rmsd is 49.640026
sib.fastconf.EADock3: Minimizing binding mode 3300, energy is 1469.9048, rmsd is 26.293798
sib.fastconf.EADock3: Minimizing binding mode 3301, energy is 1472.2567, rmsd is 39.842518
sib.fastconf.EADock3: Minimizing binding mode 3302, energy is 1472.3107, rmsd is 47.805397
sib.fastconf.EADock3: Minimizing binding mode 3303, energy is 1473.3192, rmsd is 20.481459
sib.fastconf.EADock3: Minimizing binding mode 3304, energy is 1473.6304, rmsd is 1.4640554
sib.fastconf.EADock3: Minimizing binding mode 3305, energy is 1475.4725, rmsd is 45.010876
sib.fastconf.EADock3: Minimizing binding mode 3306, energy is 1477.8779, rmsd is 47.17592
sib.fastconf.EADock3: Minimizing binding mode 3307, energy is 1478.437, rmsd is 38.94557
sib.fastconf.EADock3: Minimizing binding mode 3308, energy is 1481.621, rmsd is 40.61871
sib.fastconf.EADock3: Minimizing binding mode 3309, energy is 1481.7306, rmsd is 21.879635
sib.fastconf.EADock3: Minimizing binding mode 3310, energy is 1481.7985, rmsd is 48.893383
sib.fastconf.EADock3: Minimizing binding mode 3311, energy is 1483.7141, rmsd is 35.92763
sib.fastconf.EADock3: Minimizing binding mode 3312, energy is 1485.4508, rmsd is 43.948723
sib.fastconf.EADock3: Minimizing binding mode 3313, energy is 1485.8508, rmsd is 51.591335
sib.fastconf.EADock3: Minimizing binding mode 3314, energy is 1488.4993, rmsd is 21.711763
sib.fastconf.EADock3: Minimizing binding mode 3315, energy is 1490.4286, rmsd is 46.21763
sib.fastconf.EADock3: Minimizing binding mode 3316, energy is 1495.2812, rmsd is 49.496716
sib.fastconf.EADock3: Minimizing binding mode 3317, energy is 1495.9775, rmsd is 41.51225
sib.fastconf.EADock3: Minimizing binding mode 3318, energy is 1496.8575, rmsd is 50.220093
sib.fastconf.EADock3: Minimizing binding mode 3319, energy is 1497.0922, rmsd is 28.34191
sib.fastconf.EADock3: Minimizing binding mode 3320, energy is 1498.9912, rmsd is 52.326885
sib.fastconf.EADock3: Minimizing binding mode 3321, energy is 1499.9542, rmsd is 52.54432
sib.fastconf.EADock3: Minimizing binding mode 3322, energy is 1500.7212, rmsd is 21.323887
sib.fastconf.EADock3: Minimizing binding mode 3323, energy is 1503.1207, rmsd is 24.432722
sib.fastconf.EADock3: Minimizing binding mode 3324, energy is 1503.4008, rmsd is 39.100372
sib.fastconf.EADock3: Minimizing binding mode 3325, energy is 1505.39, rmsd is 52.800488
sib.fastconf.EADock3: Minimizing binding mode 3326, energy is 1506.6906, rmsd is 39.846424
sib.fastconf.EADock3: Minimizing binding mode 3327, energy is 1506.9276, rmsd is 23.812069
sib.fastconf.EADock3: Minimizing binding mode 3328, energy is 1507.3308, rmsd is 49.075294
sib.fastconf.EADock3: Minimizing binding mode 3329, energy is 1508.1741, rmsd is 22.896236
sib.fastconf.EADock3: Minimizing binding mode 3330, energy is 1512.5917, rmsd is 20.705103
sib.fastconf.EADock3: Minimizing binding mode 3331, energy is 1514.2474, rmsd is 51.261517
sib.fastconf.EADock3: Minimizing binding mode 3332, energy is 1514.807, rmsd is 47.17747
sib.fastconf.EADock3: Minimizing binding mode 3333, energy is 1516.641, rmsd is 51.588303
sib.fastconf.EADock3: Minimizing binding mode 3334, energy is 1517.3403, rmsd is 52.11324
sib.fastconf.EADock3: Minimizing binding mode 3335, energy is 1517.553, rmsd is 27.050386
sib.fastconf.EADock3: Minimizing binding mode 3336, energy is 1518.6566, rmsd is 40.986904
sib.fastconf.EADock3: Minimizing binding mode 3337, energy is 1519.3557, rmsd is 47.776814
sib.fastconf.EADock3: Minimizing binding mode 3338, energy is 1520.025, rmsd is 43.231655
sib.fastconf.EADock3: Minimizing binding mode 3339, energy is 1521.8615, rmsd is 38.488407
sib.fastconf.EADock3: Minimizing binding mode 3340, energy is 1526.2429, rmsd is 37.36135
sib.fastconf.EADock3: Minimizing binding mode 3341, energy is 1528.3646, rmsd is 23.318361
sib.fastconf.EADock3: Minimizing binding mode 3342, energy is 1528.946, rmsd is 23.562012
sib.fastconf.EADock3: Minimizing binding mode 3343, energy is 1532.7415, rmsd is 42.03494
sib.fastconf.EADock3: Minimizing binding mode 3344, energy is 1534.1234, rmsd is 41.741016
sib.fastconf.EADock3: Minimizing binding mode 3345, energy is 1534.8379, rmsd is 3.1208024
sib.fastconf.EADock3: Minimizing binding mode 3346, energy is 1535.2784, rmsd is 23.48604
sib.fastconf.EADock3: Minimizing binding mode 3347, energy is 1535.3292, rmsd is 46.625328
sib.fastconf.EADock3: Minimizing binding mode 3348, energy is 1537.5664, rmsd is 20.059324
sib.fastconf.EADock3: Minimizing binding mode 3349, energy is 1540.2333, rmsd is 25.999098
sib.fastconf.EADock3: Minimizing binding mode 3350, energy is 1541.3867, rmsd is 25.798895
sib.fastconf.EADock3: Minimizing binding mode 3351, energy is 1542.4996, rmsd is 41.249367
sib.fastconf.EADock3: Minimizing binding mode 3352, energy is 1545.8248, rmsd is 49.109028
sib.fastconf.EADock3: Minimizing binding mode 3353, energy is 1546.3877, rmsd is 21.096235
sib.fastconf.EADock3: Minimizing binding mode 3354, energy is 1547.0525, rmsd is 48.201885
sib.fastconf.EADock3: Minimizing binding mode 3355, energy is 1548.5912, rmsd is 23.944326
sib.fastconf.EADock3: Minimizing binding mode 3356, energy is 1550.1898, rmsd is 37.15944
sib.fastconf.EADock3: Minimizing binding mode 3357, energy is 1551.0327, rmsd is 20.243158
sib.fastconf.EADock3: Minimizing binding mode 3358, energy is 1551.6527, rmsd is 3.2056508
sib.fastconf.EADock3: Minimizing binding mode 3359, energy is 1552.339, rmsd is 24.038467
sib.fastconf.EADock3: Minimizing binding mode 3360, energy is 1554.2935, rmsd is 40.957733
sib.fastconf.EADock3: Minimizing binding mode 3361, energy is 1555.0446, rmsd is 38.35494
sib.fastconf.EADock3: Minimizing binding mode 3362, energy is 1555.2395, rmsd is 49.626755
sib.fastconf.EADock3: Minimizing binding mode 3363, energy is 1555.4689, rmsd is 24.169584
sib.fastconf.EADock3: Minimizing binding mode 3364, energy is 1557.5042, rmsd is 39.775696
sib.fastconf.EADock3: Minimizing binding mode 3365, energy is 1559.063, rmsd is 52.970943
sib.fastconf.EADock3: Minimizing binding mode 3366, energy is 1560.9347, rmsd is 1.8367977
sib.fastconf.EADock3: Minimizing binding mode 3367, energy is 1561.6608, rmsd is 35.93113
sib.fastconf.EADock3: Minimizing binding mode 3368, energy is 1561.895, rmsd is 22.022802
sib.fastconf.EADock3: Minimizing binding mode 3369, energy is 1562.4006, rmsd is 41.05819
sib.fastconf.EADock3: Minimizing binding mode 3370, energy is 1563.4492, rmsd is 42.33506
sib.fastconf.EADock3: Minimizing binding mode 3371, energy is 1563.925, rmsd is 27.4245
sib.fastconf.EADock3: Minimizing binding mode 3372, energy is 1564.0896, rmsd is 52.55741
sib.fastconf.EADock3: Minimizing binding mode 3373, energy is 1567.2736, rmsd is 48.99471
sib.fastconf.EADock3: Minimizing binding mode 3374, energy is 1567.9415, rmsd is 27.085495
sib.fastconf.EADock3: Minimizing binding mode 3375, energy is 1568.7854, rmsd is 50.7778
sib.fastconf.EADock3: Minimizing binding mode 3376, energy is 1572.5208, rmsd is 34.540344
sib.fastconf.EADock3: Minimizing binding mode 3377, energy is 1577.5553, rmsd is 45.321835
sib.fastconf.EADock3: Minimizing binding mode 3378, energy is 1578.317, rmsd is 31.615122
sib.fastconf.EADock3: Minimizing binding mode 3379, energy is 1578.4044, rmsd is 42.028564
sib.fastconf.EADock3: Minimizing binding mode 3380, energy is 1579.4302, rmsd is 34.91182
sib.fastconf.EADock3: Minimizing binding mode 3381, energy is 1580.9419, rmsd is 28.521017
sib.fastconf.EADock3: Minimizing binding mode 3382, energy is 1581.6128, rmsd is 48.516926
sib.fastconf.EADock3: Minimizing binding mode 3383, energy is 1585.9183, rmsd is 47.668945
sib.fastconf.EADock3: Minimizing binding mode 3384, energy is 1587.2863, rmsd is 26.649557
sib.fastconf.EADock3: Minimizing binding mode 3385, energy is 1587.8628, rmsd is 37.47165
sib.fastconf.EADock3: Minimizing binding mode 3386, energy is 1589.2992, rmsd is 20.906511
sib.fastconf.EADock3: Minimizing binding mode 3387, energy is 1589.727, rmsd is 26.091335
sib.fastconf.EADock3: Minimizing binding mode 3388, energy is 1591.5784, rmsd is 38.216972
sib.fastconf.EADock3: Minimizing binding mode 3389, energy is 1591.7053, rmsd is 34.890213
sib.fastconf.EADock3: Minimizing binding mode 3390, energy is 1592.1265, rmsd is 21.313812
sib.fastconf.EADock3: Minimizing binding mode 3391, energy is 1592.5093, rmsd is 35.66262
sib.fastconf.EADock3: Minimizing binding mode 3392, energy is 1594.2559, rmsd is 33.75773
sib.fastconf.EADock3: Minimizing binding mode 3393, energy is 1597.3596, rmsd is 49.34023
sib.fastconf.EADock3: Minimizing binding mode 3394, energy is 1597.6022, rmsd is 53.637753
sib.fastconf.EADock3: Minimizing binding mode 3395, energy is 1599.4783, rmsd is 42.448242
sib.fastconf.EADock3: Minimizing binding mode 3396, energy is 1601.1532, rmsd is 24.431446
sib.fastconf.EADock3: Minimizing binding mode 3397, energy is 1601.82, rmsd is 45.8737
sib.fastconf.EADock3: Minimizing binding mode 3398, energy is 1602.0447, rmsd is 22.256842
sib.fastconf.EADock3: Minimizing binding mode 3399, energy is 1602.049, rmsd is 52.62057
sib.fastconf.EADock3: Minimizing binding mode 3400, energy is 1602.0609, rmsd is 51.50976
sib.fastconf.EADock3: Minimizing binding mode 3401, energy is 1605.088, rmsd is 49.89344
sib.fastconf.EADock3: Minimizing binding mode 3402, energy is 1608.2863, rmsd is 36.05216
sib.fastconf.EADock3: Minimizing binding mode 3403, energy is 1608.3383, rmsd is 64.15584
sib.fastconf.EADock3: Minimizing binding mode 3404, energy is 1608.9171, rmsd is 34.575775
sib.fastconf.EADock3: Minimizing binding mode 3405, energy is 1609.7075, rmsd is 50.232765
sib.fastconf.EADock3: Minimizing binding mode 3406, energy is 1614.5593, rmsd is 53.93413
sib.fastconf.EADock3: Minimizing binding mode 3407, energy is 1616.0226, rmsd is 36.009026
sib.fastconf.EADock3: Minimizing binding mode 3408, energy is 1617.596, rmsd is 33.597763
sib.fastconf.EADock3: Minimizing binding mode 3409, energy is 1618.2098, rmsd is 21.760836
sib.fastconf.EADock3: Minimizing binding mode 3410, energy is 1618.5386, rmsd is 41.043747
sib.fastconf.EADock3: Minimizing binding mode 3411, energy is 1620.5984, rmsd is 28.006006
sib.fastconf.EADock3: Minimizing binding mode 3412, energy is 1620.6873, rmsd is 26.960878
sib.fastconf.EADock3: Minimizing binding mode 3413, energy is 1621.5176, rmsd is 52.12603
sib.fastconf.EADock3: Minimizing binding mode 3414, energy is 1621.82, rmsd is 39.56001
sib.fastconf.EADock3: Minimizing binding mode 3415, energy is 1621.844, rmsd is 2.3705833
sib.fastconf.EADock3: Minimizing binding mode 3416, energy is 1622.232, rmsd is 40.800423
sib.fastconf.EADock3: Minimizing binding mode 3417, energy is 1623.6483, rmsd is 54.981075
sib.fastconf.EADock3: Minimizing binding mode 3418, energy is 1624.9828, rmsd is 22.142826
sib.fastconf.EADock3: Minimizing binding mode 3419, energy is 1625.5135, rmsd is 42.443935
sib.fastconf.EADock3: Minimizing binding mode 3420, energy is 1627.0714, rmsd is 43.38779
sib.fastconf.EADock3: Minimizing binding mode 3421, energy is 1629.8035, rmsd is 44.390625
sib.fastconf.EADock3: Minimizing binding mode 3422, energy is 1632.497, rmsd is 44.993645
sib.fastconf.EADock3: Minimizing binding mode 3423, energy is 1633.6721, rmsd is 23.000147
sib.fastconf.EADock3: Minimizing binding mode 3424, energy is 1633.7423, rmsd is 49.511642
sib.fastconf.EADock3: Minimizing binding mode 3425, energy is 1634.3438, rmsd is 34.899708
sib.fastconf.EADock3: Minimizing binding mode 3426, energy is 1634.6519, rmsd is 51.55095
sib.fastconf.EADock3: Minimizing binding mode 3427, energy is 1636.4142, rmsd is 40.306667
sib.fastconf.EADock3: Minimizing binding mode 3428, energy is 1636.98, rmsd is 30.726156
sib.fastconf.EADock3: Minimizing binding mode 3429, energy is 1639.3861, rmsd is 21.701916
sib.fastconf.EADock3: Minimizing binding mode 3430, energy is 1639.6338, rmsd is 23.341845
sib.fastconf.EADock3: Minimizing binding mode 3431, energy is 1640.4601, rmsd is 50.68605
sib.fastconf.EADock3: Minimizing binding mode 3432, energy is 1643.3671, rmsd is 46.420475
sib.fastconf.EADock3: Minimizing binding mode 3433, energy is 1645.3763, rmsd is 26.811802
sib.fastconf.EADock3: Minimizing binding mode 3434, energy is 1646.4336, rmsd is 52.326054
sib.fastconf.EADock3: Minimizing binding mode 3435, energy is 1647.3066, rmsd is 49.132538
sib.fastconf.EADock3: Minimizing binding mode 3436, energy is 1648.7832, rmsd is 35.832973
sib.fastconf.EADock3: Minimizing binding mode 3437, energy is 1651.1046, rmsd is 29.423326
sib.fastconf.EADock3: Minimizing binding mode 3438, energy is 1651.3441, rmsd is 34.1711
sib.fastconf.EADock3: Minimizing binding mode 3439, energy is 1651.353, rmsd is 36.945126
sib.fastconf.EADock3: Minimizing binding mode 3440, energy is 1660.6631, rmsd is 53.49684
sib.fastconf.EADock3: Minimizing binding mode 3441, energy is 1661.1549, rmsd is 33.686195
sib.fastconf.EADock3: Minimizing binding mode 3442, energy is 1663.5289, rmsd is 25.26051
sib.fastconf.EADock3: Minimizing binding mode 3443, energy is 1663.7314, rmsd is 33.08522
sib.fastconf.EADock3: Minimizing binding mode 3444, energy is 1665.1608, rmsd is 52.168148
sib.fastconf.EADock3: Minimizing binding mode 3445, energy is 1668.5371, rmsd is 49.35744
sib.fastconf.EADock3: Minimizing binding mode 3446, energy is 1670.8844, rmsd is 23.533812
sib.fastconf.EADock3: Minimizing binding mode 3447, energy is 1671.9202, rmsd is 39.270035
sib.fastconf.EADock3: Minimizing binding mode 3448, energy is 1673.3582, rmsd is 26.516872
sib.fastconf.EADock3: Minimizing binding mode 3449, energy is 1673.4271, rmsd is 43.32088
sib.fastconf.EADock3: Minimizing binding mode 3450, energy is 1675.8757, rmsd is 42.274124
sib.fastconf.EADock3: Minimizing binding mode 3451, energy is 1677.9795, rmsd is 47.851147
sib.fastconf.EADock3: Minimizing binding mode 3452, energy is 1680.9648, rmsd is 48.567303
sib.fastconf.EADock3: Minimizing binding mode 3453, energy is 1682.7378, rmsd is 38.224407
sib.fastconf.EADock3: Minimizing binding mode 3454, energy is 1682.8407, rmsd is 52.074566
sib.fastconf.EADock3: Minimizing binding mode 3455, energy is 1684.7971, rmsd is 45.846313
sib.fastconf.EADock3: Minimizing binding mode 3456, energy is 1684.9745, rmsd is 26.802782
sib.fastconf.EADock3: Minimizing binding mode 3457, energy is 1690.2651, rmsd is 46.9941
sib.fastconf.EADock3: Minimizing binding mode 3458, energy is 1691.2247, rmsd is 52.024822
sib.fastconf.EADock3: Minimizing binding mode 3459, energy is 1693.7418, rmsd is 26.848274
sib.fastconf.EADock3: Minimizing binding mode 3460, energy is 1695.3689, rmsd is 51.483814
sib.fastconf.EADock3: Minimizing binding mode 3461, energy is 1699.0874, rmsd is 43.699986
sib.fastconf.EADock3: Minimizing binding mode 3462, energy is 1702.178, rmsd is 45.99932
sib.fastconf.EADock3: Minimizing binding mode 3463, energy is 1702.9542, rmsd is 35.985504
sib.fastconf.EADock3: Minimizing binding mode 3464, energy is 1703.762, rmsd is 21.185266
sib.fastconf.EADock3: Minimizing binding mode 3465, energy is 1705.2982, rmsd is 2.6400156
sib.fastconf.EADock3: Minimizing binding mode 3466, energy is 1705.4644, rmsd is 23.008348
sib.fastconf.EADock3: Minimizing binding mode 3467, energy is 1706.72, rmsd is 22.45758
sib.fastconf.EADock3: Minimizing binding mode 3468, energy is 1707.8242, rmsd is 26.853226
sib.fastconf.EADock3: Minimizing binding mode 3469, energy is 1708.225, rmsd is 26.587603
sib.fastconf.EADock3: Minimizing binding mode 3470, energy is 1712.5499, rmsd is 43.310497
sib.fastconf.EADock3: Minimizing binding mode 3471, energy is 1713.3916, rmsd is 41.852577
sib.fastconf.EADock3: Minimizing binding mode 3472, energy is 1713.4956, rmsd is 44.037525
sib.fastconf.EADock3: Minimizing binding mode 3473, energy is 1715.2478, rmsd is 2.586002
sib.fastconf.EADock3: Minimizing binding mode 3474, energy is 1717.6676, rmsd is 21.683231
sib.fastconf.EADock3: Minimizing binding mode 3475, energy is 1718.6227, rmsd is 49.831856
sib.fastconf.EADock3: Minimizing binding mode 3476, energy is 1719.617, rmsd is 41.42637
sib.fastconf.EADock3: Minimizing binding mode 3477, energy is 1720.1683, rmsd is 44.492733
sib.fastconf.EADock3: Minimizing binding mode 3478, energy is 1722.3405, rmsd is 45.281784
sib.fastconf.EADock3: Minimizing binding mode 3479, energy is 1722.4357, rmsd is 20.338575
sib.fastconf.EADock3: Minimizing binding mode 3480, energy is 1722.54, rmsd is 50.819096
sib.fastconf.EADock3: Minimizing binding mode 3481, energy is 1729.9602, rmsd is 51.55699
sib.fastconf.EADock3: Minimizing binding mode 3482, energy is 1730.1934, rmsd is 37.829224
sib.fastconf.EADock3: Minimizing binding mode 3483, energy is 1732.3712, rmsd is 35.97339
sib.fastconf.EADock3: Minimizing binding mode 3484, energy is 1732.9886, rmsd is 28.266703
sib.fastconf.EADock3: Minimizing binding mode 3485, energy is 1737.7181, rmsd is 32.041645
sib.fastconf.EADock3: Minimizing binding mode 3486, energy is 1741.556, rmsd is 25.422178
sib.fastconf.EADock3: Minimizing binding mode 3487, energy is 1742.8875, rmsd is 24.831266
sib.fastconf.EADock3: Minimizing binding mode 3488, energy is 1748.7401, rmsd is 24.209478
sib.fastconf.EADock3: Minimizing binding mode 3489, energy is 1751.9462, rmsd is 35.695118
sib.fastconf.EADock3: Minimizing binding mode 3490, energy is 1755.201, rmsd is 52.9419
sib.fastconf.EADock3: Minimizing binding mode 3491, energy is 1759.2554, rmsd is 23.691483
sib.fastconf.EADock3: Minimizing binding mode 3492, energy is 1760.3977, rmsd is 54.015778
sib.fastconf.EADock3: Minimizing binding mode 3493, energy is 1762.5752, rmsd is 22.99339
sib.fastconf.EADock3: Minimizing binding mode 3494, energy is 1763.1904, rmsd is 36.388756
sib.fastconf.EADock3: Minimizing binding mode 3495, energy is 1765.2858, rmsd is 37.837315
sib.fastconf.EADock3: Minimizing binding mode 3496, energy is 1768.5658, rmsd is 34.802948
sib.fastconf.EADock3: Minimizing binding mode 3497, energy is 1769.0873, rmsd is 22.129791
sib.fastconf.EADock3: Minimizing binding mode 3498, energy is 1769.2087, rmsd is 25.572351
sib.fastconf.EADock3: Minimizing binding mode 3499, energy is 1772.9178, rmsd is 21.820602
sib.fastconf.EADock3: Minimizing binding mode 3500, energy is 1775.9705, rmsd is 54.528366
sib.fastconf.EADock3: Minimizing binding mode 3501, energy is 1777.2179, rmsd is 41.380863
sib.fastconf.EADock3: Minimizing binding mode 3502, energy is 1782.5487, rmsd is 26.812033
sib.fastconf.EADock3: Minimizing binding mode 3503, energy is 1785.3561, rmsd is 23.647062
sib.fastconf.EADock3: Minimizing binding mode 3504, energy is 1790.7714, rmsd is 20.951254
sib.fastconf.EADock3: Minimizing binding mode 3505, energy is 1791.209, rmsd is 34.380592
sib.fastconf.EADock3: Minimizing binding mode 3506, energy is 1793.7222, rmsd is 49.225094
sib.fastconf.EADock3: Minimizing binding mode 3507, energy is 1795.6115, rmsd is 35.585426
sib.fastconf.EADock3: Minimizing binding mode 3508, energy is 1796.3706, rmsd is 36.209465
sib.fastconf.EADock3: Minimizing binding mode 3509, energy is 1796.3721, rmsd is 35.36884
sib.fastconf.EADock3: Minimizing binding mode 3510, energy is 1796.3739, rmsd is 26.044739
sib.fastconf.EADock3: Minimizing binding mode 3511, energy is 1796.8994, rmsd is 43.622093
sib.fastconf.EADock3: Minimizing binding mode 3512, energy is 1798.6049, rmsd is 51.2601
sib.fastconf.EADock3: Minimizing binding mode 3513, energy is 1800.1458, rmsd is 42.60056
sib.fastconf.EADock3: Minimizing binding mode 3514, energy is 1806.8319, rmsd is 34.96208
sib.fastconf.EADock3: Minimizing binding mode 3515, energy is 1808.5914, rmsd is 36.111214
sib.fastconf.EADock3: Minimizing binding mode 3516, energy is 1812.7125, rmsd is 25.976484
sib.fastconf.EADock3: Minimizing binding mode 3517, energy is 1813.678, rmsd is 36.735626
sib.fastconf.EADock3: Minimizing binding mode 3518, energy is 1818.5579, rmsd is 45.09115
sib.fastconf.EADock3: Minimizing binding mode 3519, energy is 1819.3501, rmsd is 19.486038
sib.fastconf.EADock3: Minimizing binding mode 3520, energy is 1819.4652, rmsd is 45.283447
sib.fastconf.EADock3: Minimizing binding mode 3521, energy is 1821.2402, rmsd is 47.738125
sib.fastconf.EADock3: Minimizing binding mode 3522, energy is 1828.6661, rmsd is 27.01673
sib.fastconf.EADock3: Minimizing binding mode 3523, energy is 1829.6882, rmsd is 44.293987
sib.fastconf.EADock3: Minimizing binding mode 3524, energy is 1831.2407, rmsd is 42.0743
sib.fastconf.EADock3: Minimizing binding mode 3525, energy is 1831.9927, rmsd is 22.626284
sib.fastconf.EADock3: Minimizing binding mode 3526, energy is 1832.4557, rmsd is 35.210403
sib.fastconf.EADock3: Minimizing binding mode 3527, energy is 1832.9255, rmsd is 48.909954
sib.fastconf.EADock3: Minimizing binding mode 3528, energy is 1833.7395, rmsd is 23.184864
sib.fastconf.EADock3: Minimizing binding mode 3529, energy is 1833.9404, rmsd is 21.841667
sib.fastconf.EADock3: Minimizing binding mode 3530, energy is 1834.4172, rmsd is 40.677185
sib.fastconf.EADock3: Minimizing binding mode 3531, energy is 1836.3202, rmsd is 37.094727
sib.fastconf.EADock3: Minimizing binding mode 3532, energy is 1840.2258, rmsd is 25.755201
sib.fastconf.EADock3: Minimizing binding mode 3533, energy is 1843.5673, rmsd is 41.791695
sib.fastconf.EADock3: Minimizing binding mode 3534, energy is 1843.7407, rmsd is 29.384737
sib.fastconf.EADock3: Minimizing binding mode 3535, energy is 1846.5461, rmsd is 37.279922
sib.fastconf.EADock3: Minimizing binding mode 3536, energy is 1848.1399, rmsd is 34.197674
sib.fastconf.EADock3: Minimizing binding mode 3537, energy is 1848.7113, rmsd is 48.174965
sib.fastconf.EADock3: Minimizing binding mode 3538, energy is 1854.1925, rmsd is 51.386242
sib.fastconf.EADock3: Minimizing binding mode 3539, energy is 1862.6802, rmsd is 35.971127
sib.fastconf.EADock3: Minimizing binding mode 3540, energy is 1866.6222, rmsd is 37.86641
sib.fastconf.EADock3: Minimizing binding mode 3541, energy is 1868.6516, rmsd is 49.807198
sib.fastconf.EADock3: Minimizing binding mode 3542, energy is 1873.3972, rmsd is 29.291668
sib.fastconf.EADock3: Minimizing binding mode 3543, energy is 1874.0164, rmsd is 48.7671
sib.fastconf.EADock3: Minimizing binding mode 3544, energy is 1875.1962, rmsd is 48.379025
sib.fastconf.EADock3: Minimizing binding mode 3545, energy is 1877.4034, rmsd is 27.4591
sib.fastconf.EADock3: Minimizing binding mode 3546, energy is 1879.9677, rmsd is 59.248615
sib.fastconf.EADock3: Minimizing binding mode 3547, energy is 1880.9252, rmsd is 50.625954
sib.fastconf.EADock3: Minimizing binding mode 3548, energy is 1889.0408, rmsd is 31.49255
sib.fastconf.EADock3: Minimizing binding mode 3549, energy is 1889.5332, rmsd is 48.01388
sib.fastconf.EADock3: Minimizing binding mode 3550, energy is 1891.4928, rmsd is 42.411602
sib.fastconf.EADock3: Minimizing binding mode 3551, energy is 1892.4415, rmsd is 38.329433
sib.fastconf.EADock3: Minimizing binding mode 3552, energy is 1896.3179, rmsd is 37.91522
sib.fastconf.EADock3: Minimizing binding mode 3553, energy is 1899.2396, rmsd is 50.393124
sib.fastconf.EADock3: Minimizing binding mode 3554, energy is 1901.1577, rmsd is 38.55702
sib.fastconf.EADock3: Minimizing binding mode 3555, energy is 1904.3958, rmsd is 24.088686
sib.fastconf.EADock3: Minimizing binding mode 3556, energy is 1906.1056, rmsd is 40.908302
sib.fastconf.EADock3: Minimizing binding mode 3557, energy is 1907.163, rmsd is 32.611023
sib.fastconf.EADock3: Minimizing binding mode 3558, energy is 1913.5339, rmsd is 47.693893
sib.fastconf.EADock3: Minimizing binding mode 3559, energy is 1915.129, rmsd is 41.191837
sib.fastconf.EADock3: Minimizing binding mode 3560, energy is 1918.4387, rmsd is 26.958538
sib.fastconf.EADock3: Minimizing binding mode 3561, energy is 1921.642, rmsd is 39.69101
sib.fastconf.EADock3: Minimizing binding mode 3562, energy is 1926.4131, rmsd is 20.950893
sib.fastconf.EADock3: Minimizing binding mode 3563, energy is 1927.2527, rmsd is 47.662766
sib.fastconf.EADock3: Minimizing binding mode 3564, energy is 1930.5645, rmsd is 47.221615
sib.fastconf.EADock3: Minimizing binding mode 3565, energy is 1931.6985, rmsd is 52.264828
sib.fastconf.EADock3: Minimizing binding mode 3566, energy is 1932.1525, rmsd is 50.565075
sib.fastconf.EADock3: Minimizing binding mode 3567, energy is 1932.6008, rmsd is 52.22711
sib.fastconf.EADock3: Minimizing binding mode 3568, energy is 1933.1752, rmsd is 42.61448
sib.fastconf.EADock3: Minimizing binding mode 3569, energy is 1934.0648, rmsd is 23.997446
sib.fastconf.EADock3: Minimizing binding mode 3570, energy is 1934.8926, rmsd is 51.56496
sib.fastconf.EADock3: Minimizing binding mode 3571, energy is 1936.6042, rmsd is 48.389458
sib.fastconf.EADock3: Minimizing binding mode 3572, energy is 1941.5863, rmsd is 42.812366
sib.fastconf.EADock3: Minimizing binding mode 3573, energy is 1942.407, rmsd is 47.922855
sib.fastconf.EADock3: Minimizing binding mode 3574, energy is 1945.8517, rmsd is 39.650013
sib.fastconf.EADock3: Minimizing binding mode 3575, energy is 1947.1913, rmsd is 23.10201
sib.fastconf.EADock3: Minimizing binding mode 3576, energy is 1947.864, rmsd is 33.7667
sib.fastconf.EADock3: Minimizing binding mode 3577, energy is 1948.1011, rmsd is 25.955683
sib.fastconf.EADock3: Minimizing binding mode 3578, energy is 1950.9764, rmsd is 40.161983
sib.fastconf.EADock3: Minimizing binding mode 3579, energy is 1957.2705, rmsd is 48.971302
sib.fastconf.EADock3: Minimizing binding mode 3580, energy is 1961.0254, rmsd is 28.073921
sib.fastconf.EADock3: Minimizing binding mode 3581, energy is 1964.3646, rmsd is 52.907562
sib.fastconf.EADock3: Minimizing binding mode 3582, energy is 1966.8806, rmsd is 1.1639547
sib.fastconf.EADock3: Minimizing binding mode 3583, energy is 1966.9165, rmsd is 33.37462
sib.fastconf.EADock3: Minimizing binding mode 3584, energy is 1969.3245, rmsd is 40.209034
sib.fastconf.EADock3: Minimizing binding mode 3585, energy is 1972.1292, rmsd is 54.485756
sib.fastconf.EADock3: Minimizing binding mode 3586, energy is 1972.8835, rmsd is 21.171188
sib.fastconf.EADock3: Minimizing binding mode 3587, energy is 1979.1996, rmsd is 45.04124
sib.fastconf.EADock3: Minimizing binding mode 3588, energy is 1980.243, rmsd is 52.031254
sib.fastconf.EADock3: Minimizing binding mode 3589, energy is 1982.3624, rmsd is 52.46784
sib.fastconf.EADock3: Minimizing binding mode 3590, energy is 1983.384, rmsd is 49.113487
sib.fastconf.EADock3: Minimizing binding mode 3591, energy is 1988.5258, rmsd is 41.44278
sib.fastconf.EADock3: Minimizing binding mode 3592, energy is 1991.2347, rmsd is 47.85336
sib.fastconf.EADock3: Minimizing binding mode 3593, energy is 1993.1794, rmsd is 21.918173
sib.fastconf.EADock3: Minimizing binding mode 3594, energy is 1993.3274, rmsd is 35.21156
sib.fastconf.EADock3: Minimizing binding mode 3595, energy is 1993.5903, rmsd is 51.32019
sib.fastconf.EADock3: Minimizing binding mode 3596, energy is 1995.0032, rmsd is 34.43325
sib.fastconf.EADock3: Minimizing binding mode 3597, energy is 2001.892, rmsd is 53.097527
sib.fastconf.EADock3: Minimizing binding mode 3598, energy is 2011.57, rmsd is 28.119104
sib.fastconf.EADock3: Minimizing binding mode 3599, energy is 2012.8632, rmsd is 37.699276
sib.fastconf.EADock3: Minimizing binding mode 3600, energy is 2014.4471, rmsd is 22.181543
sib.fastconf.EADock3: Minimizing binding mode 3601, energy is 2016.9186, rmsd is 47.516243
sib.fastconf.EADock3: Minimizing binding mode 3602, energy is 2020.5413, rmsd is 27.786633
sib.fastconf.EADock3: Minimizing binding mode 3603, energy is 2025.0568, rmsd is 29.106419
sib.fastconf.EADock3: Minimizing binding mode 3604, energy is 2031.8788, rmsd is 25.153845
sib.fastconf.EADock3: Minimizing binding mode 3605, energy is 2032.7124, rmsd is 42.000534
sib.fastconf.EADock3: Minimizing binding mode 3606, energy is 2033.3518, rmsd is 48.00689
sib.fastconf.EADock3: Minimizing binding mode 3607, energy is 2033.5498, rmsd is 19.02599
sib.fastconf.EADock3: Minimizing binding mode 3608, energy is 2035.1892, rmsd is 50.02901
sib.fastconf.EADock3: Minimizing binding mode 3609, energy is 2040.3882, rmsd is 47.987564
sib.fastconf.EADock3: Minimizing binding mode 3610, energy is 2043.3683, rmsd is 35.013233
sib.fastconf.EADock3: Minimizing binding mode 3611, energy is 2043.5267, rmsd is 41.432514
sib.fastconf.EADock3: Minimizing binding mode 3612, energy is 2045.5128, rmsd is 48.941944
sib.fastconf.EADock3: Minimizing binding mode 3613, energy is 2049.246, rmsd is 45.02215
sib.fastconf.EADock3: Minimizing binding mode 3614, energy is 2049.2559, rmsd is 52.002186
sib.fastconf.EADock3: Minimizing binding mode 3615, energy is 2050.5212, rmsd is 37.57898
sib.fastconf.EADock3: Minimizing binding mode 3616, energy is 2054.4922, rmsd is 33.970707
sib.fastconf.EADock3: Minimizing binding mode 3617, energy is 2055.2688, rmsd is 35.190987
sib.fastconf.EADock3: Minimizing binding mode 3618, energy is 2059.6045, rmsd is 28.422955
sib.fastconf.EADock3: Minimizing binding mode 3619, energy is 2060.7395, rmsd is 35.655903
sib.fastconf.EADock3: Minimizing binding mode 3620, energy is 2061.5598, rmsd is 51.28766
sib.fastconf.EADock3: Minimizing binding mode 3621, energy is 2069.5889, rmsd is 40.301365
sib.fastconf.EADock3: Minimizing binding mode 3622, energy is 2072.2625, rmsd is 38.530365
sib.fastconf.EADock3: Minimizing binding mode 3623, energy is 2072.9841, rmsd is 20.984257
sib.fastconf.EADock3: Minimizing binding mode 3624, energy is 2073.9988, rmsd is 34.643528
sib.fastconf.EADock3: Minimizing binding mode 3625, energy is 2077.7847, rmsd is 36.10238
sib.fastconf.EADock3: Minimizing binding mode 3626, energy is 2078.1, rmsd is 42.55218
sib.fastconf.EADock3: Minimizing binding mode 3627, energy is 2079.5117, rmsd is 23.0262
sib.fastconf.EADock3: Minimizing binding mode 3628, energy is 2080.0938, rmsd is 36.291008
sib.fastconf.EADock3: Minimizing binding mode 3629, energy is 2087.6577, rmsd is 36.35544
sib.fastconf.EADock3: Minimizing binding mode 3630, energy is 2087.8494, rmsd is 28.211954
sib.fastconf.EADock3: Minimizing binding mode 3631, energy is 2089.791, rmsd is 25.829163
sib.fastconf.EADock3: Minimizing binding mode 3632, energy is 2089.8735, rmsd is 43.80295
sib.fastconf.EADock3: Minimizing binding mode 3633, energy is 2090.6814, rmsd is 40.83028
sib.fastconf.EADock3: Minimizing binding mode 3634, energy is 2091.189, rmsd is 53.471443
sib.fastconf.EADock3: Minimizing binding mode 3635, energy is 2093.5342, rmsd is 41.549606
sib.fastconf.EADock3: Minimizing binding mode 3636, energy is 2099.0042, rmsd is 33.7176
sib.fastconf.EADock3: Minimizing binding mode 3637, energy is 2106.5774, rmsd is 47.02782
sib.fastconf.EADock3: Minimizing binding mode 3638, energy is 2106.6504, rmsd is 20.963932
sib.fastconf.EADock3: Minimizing binding mode 3639, energy is 2109.736, rmsd is 20.59032
sib.fastconf.EADock3: Minimizing binding mode 3640, energy is 2110.3452, rmsd is 48.16403
sib.fastconf.EADock3: Minimizing binding mode 3641, energy is 2117.4849, rmsd is 40.695667
sib.fastconf.EADock3: Minimizing binding mode 3642, energy is 2118.0325, rmsd is 21.854282
sib.fastconf.EADock3: Minimizing binding mode 3643, energy is 2122.3127, rmsd is 50.221115
sib.fastconf.EADock3: Minimizing binding mode 3644, energy is 2125.1375, rmsd is 23.982044
sib.fastconf.EADock3: Minimizing binding mode 3645, energy is 2125.2812, rmsd is 37.055244
sib.fastconf.EADock3: Minimizing binding mode 3646, energy is 2127.2932, rmsd is 22.031733
sib.fastconf.EADock3: Minimizing binding mode 3647, energy is 2127.7246, rmsd is 23.357975
sib.fastconf.EADock3: Minimizing binding mode 3648, energy is 2130.0676, rmsd is 22.40591
sib.fastconf.EADock3: Minimizing binding mode 3649, energy is 2132.0742, rmsd is 41.679096
sib.fastconf.EADock3: Minimizing binding mode 3650, energy is 2135.8015, rmsd is 42.1479
sib.fastconf.EADock3: Minimizing binding mode 3651, energy is 2141.214, rmsd is 29.207787
sib.fastconf.EADock3: Minimizing binding mode 3652, energy is 2142.807, rmsd is 23.59616
sib.fastconf.EADock3: Minimizing binding mode 3653, energy is 2143.7927, rmsd is 40.520054
sib.fastconf.EADock3: Minimizing binding mode 3654, energy is 2145.2812, rmsd is 49.59468
sib.fastconf.EADock3: Minimizing binding mode 3655, energy is 2150.897, rmsd is 46.899925
sib.fastconf.EADock3: Minimizing binding mode 3656, energy is 2151.0334, rmsd is 34.750977
sib.fastconf.EADock3: Minimizing binding mode 3657, energy is 2153.8354, rmsd is 43.08606
sib.fastconf.EADock3: Minimizing binding mode 3658, energy is 2160.22, rmsd is 34.569283
sib.fastconf.EADock3: Minimizing binding mode 3659, energy is 2164.1895, rmsd is 47.42933
sib.fastconf.EADock3: Minimizing binding mode 3660, energy is 2170.874, rmsd is 47.345158
sib.fastconf.EADock3: Minimizing binding mode 3661, energy is 2171.6907, rmsd is 41.010323
sib.fastconf.EADock3: Minimizing binding mode 3662, energy is 2172.8782, rmsd is 33.969875
sib.fastconf.EADock3: Minimizing binding mode 3663, energy is 2182.9124, rmsd is 25.40862
sib.fastconf.EADock3: Minimizing binding mode 3664, energy is 2186.0293, rmsd is 54.538494
sib.fastconf.EADock3: Minimizing binding mode 3665, energy is 2187.0237, rmsd is 27.767778
sib.fastconf.EADock3: Minimizing binding mode 3666, energy is 2187.8274, rmsd is 36.43291
sib.fastconf.EADock3: Minimizing binding mode 3667, energy is 2190.3635, rmsd is 35.128937
sib.fastconf.EADock3: Minimizing binding mode 3668, energy is 2192.7622, rmsd is 49.036423
sib.fastconf.EADock3: Minimizing binding mode 3669, energy is 2194.798, rmsd is 37.894978
sib.fastconf.EADock3: Minimizing binding mode 3670, energy is 2199.7556, rmsd is 37.36046
sib.fastconf.EADock3: Minimizing binding mode 3671, energy is 2200.0862, rmsd is 38.977654
sib.fastconf.EADock3: Minimizing binding mode 3672, energy is 2200.1277, rmsd is 41.171803
sib.fastconf.EADock3: Minimizing binding mode 3673, energy is 2202.5557, rmsd is 32.22761
sib.fastconf.EADock3: Minimizing binding mode 3674, energy is 2208.8877, rmsd is 41.70086
sib.fastconf.EADock3: Minimizing binding mode 3675, energy is 2211.2334, rmsd is 36.038918
sib.fastconf.EADock3: Minimizing binding mode 3676, energy is 2213.6016, rmsd is 23.446524
sib.fastconf.EADock3: Minimizing binding mode 3677, energy is 2216.7502, rmsd is 49.08638
sib.fastconf.EADock3: Minimizing binding mode 3678, energy is 2218.4602, rmsd is 33.968445
sib.fastconf.EADock3: Minimizing binding mode 3679, energy is 2220.3638, rmsd is 48.251232
sib.fastconf.EADock3: Minimizing binding mode 3680, energy is 2221.5151, rmsd is 23.070868
sib.fastconf.EADock3: Minimizing binding mode 3681, energy is 2223.3408, rmsd is 48.029404
sib.fastconf.EADock3: Minimizing binding mode 3682, energy is 2224.6921, rmsd is 52.692574
sib.fastconf.EADock3: Minimizing binding mode 3683, energy is 2237.7673, rmsd is 36.91928
sib.fastconf.EADock3: Minimizing binding mode 3684, energy is 2240.766, rmsd is 41.99365
sib.fastconf.EADock3: Minimizing binding mode 3685, energy is 2250.2136, rmsd is 50.418552
sib.fastconf.EADock3: Minimizing binding mode 3686, energy is 2261.0784, rmsd is 41.02055
sib.fastconf.EADock3: Minimizing binding mode 3687, energy is 2262.3547, rmsd is 48.32953
sib.fastconf.EADock3: Minimizing binding mode 3688, energy is 2264.6396, rmsd is 49.97484
sib.fastconf.EADock3: Minimizing binding mode 3689, energy is 2275.5251, rmsd is 33.429813
sib.fastconf.EADock3: Minimizing binding mode 3690, energy is 2280.1323, rmsd is 47.840824
sib.fastconf.EADock3: Minimizing binding mode 3691, energy is 2281.828, rmsd is 36.985035
sib.fastconf.EADock3: Minimizing binding mode 3692, energy is 2285.058, rmsd is 41.33171
sib.fastconf.EADock3: Minimizing binding mode 3693, energy is 2286.066, rmsd is 48.76821
sib.fastconf.EADock3: Minimizing binding mode 3694, energy is 2292.129, rmsd is 22.839476
sib.fastconf.EADock3: Minimizing binding mode 3695, energy is 2295.6616, rmsd is 45.8587
sib.fastconf.EADock3: Minimizing binding mode 3696, energy is 2303.8716, rmsd is 40.173264
sib.fastconf.EADock3: Minimizing binding mode 3697, energy is 2305.325, rmsd is 49.35627
sib.fastconf.EADock3: Minimizing binding mode 3698, energy is 2306.948, rmsd is 50.729828
sib.fastconf.EADock3: Minimizing binding mode 3699, energy is 2312.146, rmsd is 20.422344
sib.fastconf.EADock3: Minimizing binding mode 3700, energy is 2315.4297, rmsd is 23.382624
sib.fastconf.EADock3: Minimizing binding mode 3701, energy is 2316.5046, rmsd is 40.254234
sib.fastconf.EADock3: Minimizing binding mode 3702, energy is 2320.3354, rmsd is 34.54072
sib.fastconf.EADock3: Minimizing binding mode 3703, energy is 2322.4297, rmsd is 25.144464
sib.fastconf.EADock3: Minimizing binding mode 3704, energy is 2324.372, rmsd is 51.18383
sib.fastconf.EADock3: Minimizing binding mode 3705, energy is 2327.4983, rmsd is 26.115913
sib.fastconf.EADock3: Minimizing binding mode 3706, energy is 2327.6738, rmsd is 47.328655
sib.fastconf.EADock3: Minimizing binding mode 3707, energy is 2332.1943, rmsd is 25.319944
sib.fastconf.EADock3: Minimizing binding mode 3708, energy is 2333.3374, rmsd is 29.688549
sib.fastconf.EADock3: Minimizing binding mode 3709, energy is 2333.8203, rmsd is 48.135975
sib.fastconf.EADock3: Minimizing binding mode 3710, energy is 2335.2773, rmsd is 47.33903
sib.fastconf.EADock3: Minimizing binding mode 3711, energy is 2335.323, rmsd is 40.9723
sib.fastconf.EADock3: Minimizing binding mode 3712, energy is 2336.4768, rmsd is 51.54325
sib.fastconf.EADock3: Minimizing binding mode 3713, energy is 2338.822, rmsd is 22.672358
sib.fastconf.EADock3: Minimizing binding mode 3714, energy is 2346.0718, rmsd is 37.140305
sib.fastconf.EADock3: Minimizing binding mode 3715, energy is 2349.4915, rmsd is 37.792458
sib.fastconf.EADock3: Minimizing binding mode 3716, energy is 2354.1934, rmsd is 50.916676
sib.fastconf.EADock3: Minimizing binding mode 3717, energy is 2368.6575, rmsd is 21.23877
sib.fastconf.EADock3: Minimizing binding mode 3718, energy is 2370.094, rmsd is 18.815105
sib.fastconf.EADock3: Minimizing binding mode 3719, energy is 2370.5603, rmsd is 40.517876
sib.fastconf.EADock3: Minimizing binding mode 3720, energy is 2372.4497, rmsd is 22.4554
sib.fastconf.EADock3: Minimizing binding mode 3721, energy is 2383.5554, rmsd is 53.535225
sib.fastconf.EADock3: Minimizing binding mode 3722, energy is 2386.5, rmsd is 25.148155
sib.fastconf.EADock3: Minimizing binding mode 3723, energy is 2386.7834, rmsd is 36.812233
sib.fastconf.EADock3: Minimizing binding mode 3724, energy is 2398.1033, rmsd is 22.101
sib.fastconf.EADock3: Minimizing binding mode 3725, energy is 2398.7788, rmsd is 47.11492
sib.fastconf.EADock3: Minimizing binding mode 3726, energy is 2423.1309, rmsd is 27.146479
sib.fastconf.EADock3: Minimizing binding mode 3727, energy is 2425.895, rmsd is 41.81852
sib.fastconf.EADock3: Minimizing binding mode 3728, energy is 2434.7615, rmsd is 35.401417
sib.fastconf.EADock3: Minimizing binding mode 3729, energy is 2451.8167, rmsd is 45.13982
sib.fastconf.EADock3: Minimizing binding mode 3730, energy is 2472.36, rmsd is 47.21919
sib.fastconf.EADock3: Minimizing binding mode 3731, energy is 2473.1309, rmsd is 34.946583
sib.fastconf.EADock3: Minimizing binding mode 3732, energy is 2477.2534, rmsd is 40.720406
sib.fastconf.EADock3: Minimizing binding mode 3733, energy is 2478.9849, rmsd is 27.004215
sib.fastconf.EADock3: Minimizing binding mode 3734, energy is 2491.6191, rmsd is 42.43607
sib.fastconf.EADock3: Minimizing binding mode 3735, energy is 2499.8572, rmsd is 51.689865
sib.fastconf.EADock3: Minimizing binding mode 3736, energy is 2518.629, rmsd is 60.75176
sib.fastconf.EADock3: Minimizing binding mode 3737, energy is 2519.8113, rmsd is 48.315674
sib.fastconf.EADock3: Minimizing binding mode 3738, energy is 2521.2542, rmsd is 48.44824
sib.fastconf.EADock3: Minimizing binding mode 3739, energy is 2523.1572, rmsd is 50.744522
sib.fastconf.EADock3: Minimizing binding mode 3740, energy is 2528.7056, rmsd is 41.636944
sib.fastconf.EADock3: Minimizing binding mode 3741, energy is 2530.3945, rmsd is 39.120472
sib.fastconf.EADock3: Minimizing binding mode 3742, energy is 2535.0476, rmsd is 53.568928
sib.fastconf.EADock3: Minimizing binding mode 3743, energy is 2538.4524, rmsd is 49.1465
sib.fastconf.EADock3: Minimizing binding mode 3744, energy is 2544.757, rmsd is 34.80151
sib.fastconf.EADock3: Minimizing binding mode 3745, energy is 2550.0461, rmsd is 37.061245
sib.fastconf.EADock3: Minimizing binding mode 3746, energy is 2563.2036, rmsd is 48.25023
sib.fastconf.EADock3: Minimizing binding mode 3747, energy is 2574.4258, rmsd is 38.21299
sib.fastconf.EADock3: Minimizing binding mode 3748, energy is 2580.5217, rmsd is 21.034237
sib.fastconf.EADock3: Minimizing binding mode 3749, energy is 2586.445, rmsd is 27.783678
sib.fastconf.EADock3: Minimizing binding mode 3750, energy is 2597.7593, rmsd is 51.370113
sib.fastconf.EADock3: Minimizing binding mode 3751, energy is 2597.8003, rmsd is 38.727367
sib.fastconf.EADock3: Minimizing binding mode 3752, energy is 2597.852, rmsd is 49.966206
sib.fastconf.EADock3: Minimizing binding mode 3753, energy is 2613.7766, rmsd is 52.397713
sib.fastconf.EADock3: Minimizing binding mode 3754, energy is 2613.8398, rmsd is 53.55382
sib.fastconf.EADock3: Minimizing binding mode 3755, energy is 2617.1328, rmsd is 36.49127
sib.fastconf.EADock3: Minimizing binding mode 3756, energy is 2618.0967, rmsd is 47.69932
sib.fastconf.EADock3: Minimizing binding mode 3757, energy is 2618.191, rmsd is 23.102226
sib.fastconf.EADock3: Minimizing binding mode 3758, energy is 2619.3748, rmsd is 44.915802
sib.fastconf.EADock3: Minimizing binding mode 3759, energy is 2619.7585, rmsd is 54.000713
sib.fastconf.EADock3: Minimizing binding mode 3760, energy is 2625.4238, rmsd is 25.857662
sib.fastconf.EADock3: Minimizing binding mode 3761, energy is 2627.5623, rmsd is 34.80832
sib.fastconf.EADock3: Minimizing binding mode 3762, energy is 2628.561, rmsd is 47.44675
sib.fastconf.EADock3: Minimizing binding mode 3763, energy is 2644.7283, rmsd is 19.61174
sib.fastconf.EADock3: Minimizing binding mode 3764, energy is 2652.5437, rmsd is 51.59439
sib.fastconf.EADock3: Minimizing binding mode 3765, energy is 2656.6038, rmsd is 47.696148
sib.fastconf.EADock3: Minimizing binding mode 3766, energy is 2662.6125, rmsd is 45.995663
sib.fastconf.EADock3: Minimizing binding mode 3767, energy is 2663.2744, rmsd is 26.896994
sib.fastconf.EADock3: Minimizing binding mode 3768, energy is 2665.5493, rmsd is 28.485147
sib.fastconf.EADock3: Minimizing binding mode 3769, energy is 2665.6423, rmsd is 27.163618
sib.fastconf.EADock3: Minimizing binding mode 3770, energy is 2667.2256, rmsd is 20.946905
sib.fastconf.EADock3: Minimizing binding mode 3771, energy is 2670.753, rmsd is 25.97679
sib.fastconf.EADock3: Minimizing binding mode 3772, energy is 2676.4556, rmsd is 27.800955
sib.fastconf.EADock3: Minimizing binding mode 3773, energy is 2690.0115, rmsd is 52.784824
sib.fastconf.EADock3: Minimizing binding mode 3774, energy is 2690.493, rmsd is 24.63414
sib.fastconf.EADock3: Minimizing binding mode 3775, energy is 2701.4995, rmsd is 32.836903
sib.fastconf.EADock3: Minimizing binding mode 3776, energy is 2704.8127, rmsd is 48.152946
sib.fastconf.EADock3: Minimizing binding mode 3777, energy is 2706.6553, rmsd is 41.213234
sib.fastconf.EADock3: Minimizing binding mode 3778, energy is 2717.7427, rmsd is 35.222023
sib.fastconf.EADock3: Minimizing binding mode 3779, energy is 2720.2383, rmsd is 29.536577
sib.fastconf.EADock3: Minimizing binding mode 3780, energy is 2728.73, rmsd is 49.04415
sib.fastconf.EADock3: Minimizing binding mode 3781, energy is 2734.2854, rmsd is 21.781376
sib.fastconf.EADock3: Minimizing binding mode 3782, energy is 2740.9426, rmsd is 20.965128
sib.fastconf.EADock3: Minimizing binding mode 3783, energy is 2745.947, rmsd is 24.274332
sib.fastconf.EADock3: Minimizing binding mode 3784, energy is 2758.0278, rmsd is 48.5248
sib.fastconf.EADock3: Minimizing binding mode 3785, energy is 2800.379, rmsd is 51.943295
sib.fastconf.EADock3: Minimizing binding mode 3786, energy is 2807.3123, rmsd is 52.45532
sib.fastconf.EADock3: Minimizing binding mode 3787, energy is 2816.7666, rmsd is 37.192566
sib.fastconf.EADock3: Minimizing binding mode 3788, energy is 2819.5718, rmsd is 23.32131
sib.fastconf.EADock3: Minimizing binding mode 3789, energy is 2837.649, rmsd is 47.297493
sib.fastconf.EADock3: Minimizing binding mode 3790, energy is 2841.7048, rmsd is 20.587181
sib.fastconf.EADock3: Minimizing binding mode 3791, energy is 2857.1296, rmsd is 42.775917
sib.fastconf.EADock3: Minimizing binding mode 3792, energy is 2863.0195, rmsd is 28.233238
sib.fastconf.EADock3: Minimizing binding mode 3793, energy is 2871.9224, rmsd is 34.028122
sib.fastconf.EADock3: Minimizing binding mode 3794, energy is 2877.1775, rmsd is 47.490967
sib.fastconf.EADock3: Minimizing binding mode 3795, energy is 2881.6353, rmsd is 41.704964
sib.fastconf.EADock3: Minimizing binding mode 3796, energy is 2885.6045, rmsd is 41.52447
sib.fastconf.EADock3: Minimizing binding mode 3797, energy is 2922.484, rmsd is 20.570473
sib.fastconf.EADock3: Minimizing binding mode 3798, energy is 2952.768, rmsd is 22.93544
sib.fastconf.EADock3: Minimizing binding mode 3799, energy is 2953.9277, rmsd is 47.502617
sib.fastconf.EADock3: Minimizing binding mode 3800, energy is 2966.2056, rmsd is 27.724041
sib.fastconf.EADock3: Minimizing binding mode 3801, energy is 2966.9888, rmsd is 46.094177
sib.fastconf.EADock3: Minimizing binding mode 3802, energy is 2970.9443, rmsd is 47.76139
sib.fastconf.EADock3: Minimizing binding mode 3803, energy is 2972.044, rmsd is 44.8514
sib.fastconf.EADock3: Minimizing binding mode 3804, energy is 2973.2825, rmsd is 19.434824
sib.fastconf.EADock3: Minimizing binding mode 3805, energy is 2996.03, rmsd is 34.206627
sib.fastconf.EADock3: Minimizing binding mode 3806, energy is 2998.9502, rmsd is 48.21285
sib.fastconf.EADock3: Minimizing binding mode 3807, energy is 3005.8826, rmsd is 47.47602
sib.fastconf.EADock3: Minimizing binding mode 3808, energy is 3025.0215, rmsd is 34.94305
sib.fastconf.EADock3: Minimizing binding mode 3809, energy is 3030.1255, rmsd is 51.555325
sib.fastconf.EADock3: Minimizing binding mode 3810, energy is 3033.207, rmsd is 22.724344
sib.fastconf.EADock3: Minimizing binding mode 3811, energy is 3036.1733, rmsd is 37.04998
sib.fastconf.EADock3: Minimizing binding mode 3812, energy is 3039.376, rmsd is 20.676632
sib.fastconf.EADock3: Minimizing binding mode 3813, energy is 3049.1418, rmsd is 22.146343
sib.fastconf.EADock3: Minimizing binding mode 3814, energy is 3051.5747, rmsd is 24.389132
sib.fastconf.EADock3: Minimizing binding mode 3815, energy is 3059.019, rmsd is 22.366676
sib.fastconf.EADock3: Minimizing binding mode 3816, energy is 3062.7556, rmsd is 45.74474
sib.fastconf.EADock3: Minimizing binding mode 3817, energy is 3071.6685, rmsd is 22.829327
sib.fastconf.EADock3: Minimizing binding mode 3818, energy is 3073.1807, rmsd is 20.047491
sib.fastconf.EADock3: Minimizing binding mode 3819, energy is 3084.6138, rmsd is 23.037546
sib.fastconf.EADock3: Minimizing binding mode 3820, energy is 3085.2954, rmsd is 23.196362
sib.fastconf.EADock3: Minimizing binding mode 3821, energy is 3111.889, rmsd is 51.371822
sib.fastconf.EADock3: Minimizing binding mode 3822, energy is 3145.3628, rmsd is 38.54993
sib.fastconf.EADock3: Minimizing binding mode 3823, energy is 3165.0713, rmsd is 40.170147
sib.fastconf.EADock3: Minimizing binding mode 3824, energy is 3268.175, rmsd is 46.175217
sib.fastconf.EADock3: Minimizing binding mode 3825, energy is 3308.969, rmsd is 37.20984
sib.fastconf.EADock3: Minimizing binding mode 3826, energy is 3317.7139, rmsd is 26.974573
sib.fastconf.EADock3: Minimizing binding mode 3827, energy is 3331.9802, rmsd is 29.677986
sib.fastconf.EADock3: Minimizing binding mode 3828, energy is 3343.0293, rmsd is 24.78572
sib.fastconf.EADock3: Minimizing binding mode 3829, energy is 3346.8125, rmsd is 38.28635
sib.fastconf.EADock3: Minimizing binding mode 3830, energy is 3430.4883, rmsd is 20.038807
sib.fastconf.EADock3: Minimizing binding mode 3831, energy is 3433.2322, rmsd is 46.879726
sib.fastconf.EADock3: Minimizing binding mode 3832, energy is 3436.046, rmsd is 48.64525
sib.fastconf.EADock3: Minimizing binding mode 3833, energy is 3443.687, rmsd is 44.32599
sib.fastconf.EADock3: Minimizing binding mode 3834, energy is 3487.5344, rmsd is 35.650536
sib.fastconf.EADock3: Minimizing binding mode 3835, energy is 3491.2488, rmsd is 28.453074
sib.fastconf.EADock3: Minimizing binding mode 3836, energy is 3520.9644, rmsd is 28.460684
sib.fastconf.EADock3: Minimizing binding mode 3837, energy is 3526.1233, rmsd is 41.641865
sib.fastconf.EADock3: Minimizing binding mode 3838, energy is 3632.6707, rmsd is 33.31911
sib.fastconf.EADock3: Minimizing binding mode 3839, energy is 3778.889, rmsd is 29.100805
sib.fastconf.EADock3: Minimizing binding mode 3840, energy is 3788.391, rmsd is 28.618095
sib.fastconf.EADock3: Minimizing binding mode 3841, energy is 3918.81, rmsd is 23.31213
sib.fastconf.EADock3: Minimizing binding mode 3842, energy is 3979.897, rmsd is 22.952917
sib.fastconf.EADock3: Minimizing binding mode 3843, energy is 4037.6265, rmsd is 47.16112
sib.fastconf.EADock3: Minimizing binding mode 3844, energy is 4169.1655, rmsd is 38.90138
sib.fastconf.EADock3: Minimizing binding mode 3845, energy is 4241.762, rmsd is 28.991528
sib.fastconf.EADock3: Minimizing binding mode 3846, energy is 4294.4077, rmsd is 27.196957
sib.fastconf.EADock3: Minimizing binding mode 3847, energy is 4604.619, rmsd is 37.009583
sib.fastconf.EADock3: Minimizing binding mode 3848, energy is 4887.403, rmsd is 45.265648
sib.fastconf.EADock3: Filter out binding modes with an energy above 3.4028235E38 (3.4028235E38 above the most favorable binding mode, which has an energy of 0.344137)
sib.wrappers.md.charmm.ExtendedCharmmWrapper: CHARMM timers: CPU time: 1300.06 seconds
sib.wrappers.md.charmm.ExtendedCharmmWrapper: CHARMM timers: Elapsed time: 1758.51 seconds.
sib.fastconf.EADock3: Starting clustering
sib.fastconf.EADock3: Clustering iteration 0 took 770 ms and merged 1621 clusters.
sib.fastconf.EADock3: Clustering iteration 1 took 420 ms and merged 80 clusters.
sib.fastconf.EADock3: Clustering iteration 2 took 400 ms and merged 0 clusters.
sib.fastconf.EADock3: Clustering took 1610 ms.
sib.fastconf.EADock3: 3849 elements were gathered in 2148 clusters.
sib.fastconf.EADock3: Evaluating cluster 0/2148
sib.fastconf.EADock3: Evaluating binding mode 0/1 with FACTS
sib.fastconf.EADock3: Evaluating cluster 1/2148
sib.fastconf.EADock3: Evaluating binding mode 0/1 with FACTS
sib.fastconf.EADock3: Evaluating cluster 2/2148
sib.fastconf.EADock3: Evaluating binding mode 0/1 with FACTS
sib.fastconf.EADock3: Evaluating cluster 3/2148
sib.fastconf.EADock3: Evaluating binding mode 0/1 with FACTS
sib.fastconf.EADock3: Evaluating cluster 4/2148
sib.fastconf.EADock3: Evaluating binding mode 0/1 with FACTS
sib.fastconf.EADock3: Evaluating cluster 5/2148
sib.fastconf.EADock3: Evaluating binding mode 0/1 with FACTS
sib.fastconf.EADock3: Evaluating cluster 6/2148
sib.fastconf.EADock3: Evaluating binding mode 0/1 with FACTS
sib.fastconf.EADock3: Evaluating cluster 7/2148
sib.fastconf.EADock3: Evaluating binding mode 0/1 with FACTS
sib.fastconf.EADock3: Evaluating cluster 8/2148
sib.fastconf.EADock3: Evaluating binding mode 0/2 with FACTS
sib.fastconf.EADock3: Evaluating binding mode 1/2 with FACTS
sib.fastconf.EADock3: Evaluating cluster 9/2148
sib.fastconf.EADock3: Evaluating binding mode 0/1 with FACTS
sib.fastconf.EADock3: Evaluating cluster 10/2148
sib.fastconf.EADock3: Evaluating binding mode 0/1 with FACTS
sib.fastconf.EADock3: Evaluating cluster 11/2148
sib.fastconf.EADock3: Evaluating binding mode 0/1 with FACTS
sib.fastconf.EADock3: Evaluating cluster 12/2148
sib.fastconf.EADock3: Evaluating binding mode 0/1 with FACTS
sib.fastconf.EADock3: Evaluating cluster 13/2148
sib.fastconf.EADock3: Evaluating binding mode 0/1 with FACTS
sib.fastconf.EADock3: Evaluating cluster 14/2148
sib.fastconf.EADock3: Evaluating binding mode 0/2 with FACTS
sib.fastconf.EADock3: Evaluating binding mode 1/2 with FACTS
sib.fastconf.EADock3: Evaluating cluster 15/2148
sib.fastconf.EADock3: Evaluating binding mode 0/1 with FACTS
sib.fastconf.EADock3: Evaluating cluster 16/2148
sib.fastconf.EADock3: Evaluating binding mode 0/1 with FACTS
sib.fastconf.EADock3: Evaluating cluster 17/2148
sib.fastconf.EADock3: Evaluating binding mode 0/1 with FACTS
sib.fastconf.EADock3: Evaluating cluster 18/2148
sib.fastconf.EADock3: Evaluating binding mode 0/1 with FACTS
sib.fastconf.EADock3: Evaluating cluster 19/2148
sib.fastconf.EADock3: Evaluating binding mode 0/1 with FACTS
sib.fastconf.EADock3: Evaluating cluster 20/2148
sib.fastconf.EADock3: Evaluating binding mode 0/1 with FACTS
sib.fastconf.EADock3: Evaluating cluster 21/2148
sib.fastconf.EADock3: Evaluating binding mode 0/1 with FACTS
sib.fastconf.EADock3: Evaluating cluster 22/2148
sib.fastconf.EADock3: Evaluating binding mode 0/1 with FACTS
sib.fastconf.EADock3: Evaluating cluster 23/2148
sib.fastconf.EADock3: Evaluating binding mode 0/1 with FACTS
sib.fastconf.EADock3: Evaluating cluster 24/2148
sib.fastconf.EADock3: Evaluating binding mode 0/1 with FACTS
sib.fastconf.EADock3: Evaluating cluster 25/2148
sib.fastconf.EADock3: Evaluating binding mode 0/1 with FACTS
sib.fastconf.EADock3: Evaluating cluster 26/2148
sib.fastconf.EADock3: Evaluating binding mode 0/1 with FACTS
sib.fastconf.EADock3: Evaluating cluster 27/2148
sib.fastconf.EADock3: Evaluating binding mode 0/1 with FACTS
sib.fastconf.EADock3: Evaluating cluster 28/2148
sib.fastconf.EADock3: Evaluating binding mode 0/1 with FACTS
sib.fastconf.EADock3: Evaluating cluster 29/2148
sib.fastconf.EADock3: Evaluating binding mode 0/1 with FACTS
sib.fastconf.EADock3: Evaluating cluster 30/2148
sib.fastconf.EADock3: Evaluating binding mode 0/1 with FACTS
sib.fastconf.EADock3: Evaluating cluster 31/2148
sib.fastconf.EADock3: Evaluating binding mode 0/1 with FACTS
sib.fastconf.EADock3: Evaluating cluster 32/2148
sib.fastconf.EADock3: Evaluating binding mode 0/1 with FACTS
sib.fastconf.EADock3: Evaluating cluster 33/2148
sib.fastconf.EADock3: Evaluating binding mode 0/1 with FACTS
sib.fastconf.EADock3: Evaluating cluster 34/2148
sib.fastconf.EADock3: Evaluating binding mode 0/1 with FACTS
sib.fastconf.EADock3: Evaluating cluster 35/2148
sib.fastconf.EADock3: Evaluating binding mode 0/1 with FACTS
sib.fastconf.EADock3: Evaluating cluster 36/2148
sib.fastconf.EADock3: Evaluating binding mode 0/1 with FACTS
sib.fastconf.EADock3: Evaluating cluster 37/2148
sib.fastconf.EADock3: Evaluating binding mode 0/1 with FACTS
sib.fastconf.EADock3: Evaluating cluster 38/2148
sib.fastconf.EADock3: Evaluating binding mode 0/1 with FACTS
sib.fastconf.EADock3: Evaluating cluster 39/2148
sib.fastconf.EADock3: Evaluating binding mode 0/1 with FACTS
sib.fastconf.EADock3: Evaluating cluster 40/2148
sib.fastconf.EADock3: Evaluating binding mode 0/1 with FACTS
sib.fastconf.EADock3: Evaluating cluster 41/2148
sib.fastconf.EADock3: Evaluating binding mode 0/1 with FACTS
sib.fastconf.EADock3: Evaluating cluster 42/2148
sib.fastconf.EADock3: Evaluating binding mode 0/1 with FACTS
sib.fastconf.EADock3: Evaluating cluster 43/2148
sib.fastconf.EADock3: Evaluating binding mode 0/1 with FACTS
sib.fastconf.EADock3: Evaluating cluster 44/2148
sib.fastconf.EADock3: Evaluating binding mode 0/1 with FACTS
sib.fastconf.EADock3: Evaluating cluster 45/2148
sib.fastconf.EADock3: Evaluating binding mode 0/1 with FACTS
sib.fastconf.EADock3: Evaluating cluster 46/2148
sib.fastconf.EADock3: Evaluating binding mode 0/1 with FACTS
sib.fastconf.EADock3: Evaluating cluster 47/2148
sib.fastconf.EADock3: Evaluating binding mode 0/1 with FACTS
sib.fastconf.EADock3: Evaluating cluster 48/2148
sib.fastconf.EADock3: Evaluating binding mode 0/1 with FACTS
sib.fastconf.EADock3: Evaluating cluster 49/2148
sib.fastconf.EADock3: Evaluating binding mode 0/1 with FACTS
sib.fastconf.EADock3: Evaluating cluster 50/2148
sib.fastconf.EADock3: Evaluating binding mode 0/1 with FACTS
sib.fastconf.EADock3: Evaluating cluster 51/2148
sib.fastconf.EADock3: Evaluating binding mode 0/1 with FACTS
sib.fastconf.EADock3: Evaluating cluster 52/2148
sib.fastconf.EADock3: Evaluating binding mode 0/1 with FACTS
sib.fastconf.EADock3: Evaluating cluster 53/2148
sib.fastconf.EADock3: Evaluating binding mode 0/1 with FACTS
sib.fastconf.EADock3: Evaluating cluster 54/2148
sib.fastconf.EADock3: Evaluating binding mode 0/1 with FACTS
sib.fastconf.EADock3: Evaluating cluster 55/2148
sib.fastconf.EADock3: Evaluating binding mode 0/2 with FACTS
sib.fastconf.EADock3: Evaluating binding mode 1/2 with FACTS
sib.fastconf.EADock3: Evaluating cluster 56/2148
sib.fastconf.EADock3: Evaluating binding mode 0/1 with FACTS
sib.fastconf.EADock3: Evaluating cluster 57/2148
sib.fastconf.EADock3: Evaluating binding mode 0/1 with FACTS
sib.fastconf.EADock3: Evaluating cluster 58/2148
sib.fastconf.EADock3: Evaluating binding mode 0/1 with FACTS
sib.fastconf.EADock3: Evaluating cluster 59/2148
sib.fastconf.EADock3: Evaluating binding mode 0/1 with FACTS
sib.fastconf.EADock3: Evaluating cluster 60/2148
sib.fastconf.EADock3: Evaluating binding mode 0/1 with FACTS
sib.fastconf.EADock3: Evaluating cluster 61/2148
sib.fastconf.EADock3: Evaluating binding mode 0/1 with FACTS
sib.fastconf.EADock3: Evaluating cluster 62/2148
sib.fastconf.EADock3: Evaluating binding mode 0/1 with FACTS
sib.fastconf.EADock3: Evaluating cluster 63/2148
sib.fastconf.EADock3: Evaluating binding mode 0/1 with FACTS
sib.fastconf.EADock3: Evaluating cluster 64/2148
sib.fastconf.EADock3: Evaluating binding mode 0/1 with FACTS
sib.fastconf.EADock3: Evaluating cluster 65/2148
sib.fastconf.EADock3: Evaluating binding mode 0/2 with FACTS
sib.fastconf.EADock3: Evaluating binding mode 1/2 with FACTS
sib.fastconf.EADock3: Evaluating cluster 66/2148
sib.fastconf.EADock3: Evaluating binding mode 0/1 with FACTS
sib.fastconf.EADock3: Evaluating cluster 67/2148
sib.fastconf.EADock3: Evaluating binding mode 0/1 with FACTS
sib.fastconf.EADock3: Evaluating cluster 68/2148
sib.fastconf.EADock3: Evaluating binding mode 0/1 with FACTS
sib.fastconf.EADock3: Evaluating cluster 69/2148
sib.fastconf.EADock3: Evaluating binding mode 0/1 with FACTS
sib.fastconf.EADock3: Evaluating cluster 70/2148
sib.fastconf.EADock3: Evaluating binding mode 0/1 with FACTS
sib.fastconf.EADock3: Evaluating cluster 71/2148
sib.fastconf.EADock3: Evaluating binding mode 0/1 with FACTS
sib.fastconf.EADock3: Evaluating cluster 72/2148
sib.fastconf.EADock3: Evaluating binding mode 0/1 with FACTS
sib.fastconf.EADock3: Evaluating cluster 73/2148
sib.fastconf.EADock3: Evaluating binding mode 0/1 with FACTS
sib.fastconf.EADock3: Evaluating cluster 74/2148
sib.fastconf.EADock3: Evaluating binding mode 0/1 with FACTS
sib.fastconf.EADock3: Evaluating cluster 75/2148
sib.fastconf.EADock3: Evaluating binding mode 0/1 with FACTS
sib.fastconf.EADock3: Evaluating cluster 76/2148
sib.fastconf.EADock3: Evaluating binding mode 0/1 with FACTS
sib.fastconf.EADock3: Evaluating cluster 77/2148
sib.fastconf.EADock3: Evaluating binding mode 0/1 with FACTS
sib.fastconf.EADock3: Evaluating cluster 78/2148
sib.fastconf.EADock3: Evaluating binding mode 0/1 with FACTS
sib.fastconf.EADock3: Evaluating cluster 79/2148
sib.fastconf.EADock3: Evaluating binding mode 0/1 with FACTS
sib.fastconf.EADock3: Evaluating cluster 80/2148
sib.fastconf.EADock3: Evaluating binding mode 0/1 with FACTS
[truncated: 372,363 more chars]
