# Supplementary material for: Genetic Uniformity of a Specific Region in SARS-CoV-2 Genome and In-Silico Target-Oriented Repurposing of N-Acetyl-D-Glucosamine
Source: Preprints.org preprint supplement (doi:10.20944/preprints202005.0397.v1), 2020-05-24
Supplement: Supplementary file 7 [file supplementary › S7 File/open.chimerax]

<?xml version="1.0"?>
<ChimeraPuppet type="std_webdata">
<web_files>
    <file name="target.pdb" format="text" loc="http://www.swissdock.ch/files/tmp/swissdockd_u9PfwK_NVXQK8D8ZUT8X531PN6M/target.pdb" />
</web_files>
<commands>
   <py_cmd>
import urllib
import tempfile
from chimera import runCommand
tmpDirectory = tempfile.mkdtemp()
urllib.urlretrieve ("http://www.swissdock.ch/files/tmp/swissdockd_u9PfwK_NVXQK8D8ZUT8X531PN6M/clusters.dock4.pdb", "%s/clusters.dock4.pdb"%tmpDirectory)
runCommand("viewdock %s/clusters.dock4.pdb \"Dock 4, 5 or 6\""%tmpDirectory)
</py_cmd>
  <mid_cmd>color byatom #0</mid_cmd>
   <mid_cmd>ribbon #0</mid_cmd>
   <mid_cmd>repr stick :LIG</mid_cmd>
   <mid_cmd>~disp element.H</mid_cmd>
   <mid_cmd>hbonds intramodel false lineWidth 5 color green</mid_cmd>
</commands>
</ChimeraPuppet>
