# Supplementary material for: Genetic Uniformity of a Specific Region in SARS-CoV-2 Genome and In-Silico Target-Oriented Repurposing of N-Acetyl-D-Glucosamine
Source: Preprints.org preprint supplement (doi:10.20944/preprints202005.0397.v1), 2020-05-24
Supplement: Supplementary file 7 [file supplementary › S7 File/target.pdb]

REMARK  PYCHARMM CRD
REMARK   DATE:     5/ 8/20     12:11:43      CREATED BY USER: root
REMARK 
ATOM      1 N    ALA    50      -5.482  -2.529  27.588  1.00  1.00      1S   
ATOM      2 HT1  ALA    50      -4.583  -2.569  27.063  1.00  0.00      1S   
ATOM      3 HT2  ALA    50      -6.279  -2.576  26.921  1.00  0.00      1S   
ATOM      4 HT3  ALA    50      -5.536  -3.330  28.250  1.00  0.00      1S   
ATOM      5 CA   ALA    50      -5.553  -1.248  28.337  1.00  1.00      1S   
ATOM      6 HA   ALA    50      -5.359  -0.446  27.641  1.00  0.00      1S   
ATOM      7 CB   ALA    50      -6.962  -1.098  28.949  1.00  1.00      1S   
ATOM      8 HB1  ALA    50      -7.199  -1.942  29.634  1.00  0.00      1S   
ATOM      9 HB2  ALA    50      -7.728  -1.076  28.144  1.00  0.00      1S   
ATOM     10 HB3  ALA    50      -7.041  -0.148  29.520  1.00  0.00      1S   
ATOM     11 C    ALA    50      -4.521  -1.178  29.419  1.00  1.00      1S   
ATOM     12 O    ALA    50      -4.846  -0.938  30.572  1.00  1.00      1S   
ATOM     13 N    SER    51      -3.235  -1.405  29.091  1.00  1.00      1S   
ATOM     14 HN   SER    51      -2.979  -1.620  28.148  1.00  0.00      1S   
ATOM     15 CA   SER    51      -2.149  -1.382  30.048  1.00  1.00      1S   
ATOM     16 HA   SER    51      -2.537  -1.456  31.054  1.00  0.00      1S   
ATOM     17 CB   SER    51      -1.203  -2.577  29.786  1.00  1.00      1S   
ATOM     18 HB1  SER    51      -0.883  -2.523  28.731  1.00  0.00      1S   
ATOM     19 HB2  SER    51      -1.757  -3.522  29.969  1.00  0.00      1S   
ATOM     20 OG   SER    51      -0.017  -2.623  30.561  1.00  1.00      1S   
ATOM     21 HG1  SER    51      -0.263  -2.984  31.424  1.00  0.00      1S   
ATOM     22 C    SER    51      -1.419  -0.070  29.903  1.00  1.00      1S   
ATOM     23 O    SER    51      -1.812   0.792  29.123  1.00  1.00      1S   
ATOM     24 N    TRP    52      -0.327   0.097  30.679  1.00  1.00      1S   
ATOM     25 HN   TRP    52      -0.060  -0.637  31.302  1.00  0.00      1S   
ATOM     26 CA   TRP    52       0.551   1.232  30.646  1.00  1.00      1S   
ATOM     27 HA   TRP    52       0.076   2.022  30.097  1.00  0.00      1S   
ATOM     28 CB   TRP    52       0.897   1.707  32.070  1.00  1.00      1S   
ATOM     29 HB1  TRP    52       1.854   2.267  32.080  1.00  0.00      1S   
ATOM     30 HB2  TRP    52       1.004   0.812  32.726  1.00  0.00      1S   
ATOM     31 CG   TRP    52      -0.160   2.611  32.663  1.00  1.00      1S   
ATOM     32 CD1  TRP    52      -1.222   2.244  33.421  1.00  1.00      1S   
ATOM     33 HD1  TRP    52      -1.463   1.226  33.644  1.00  0.00      1S   
ATOM     34 NE1  TRP    52      -1.946   3.343  33.799  1.00  1.00      1S   
ATOM     35 HE1  TRP    52      -2.751   3.329  34.356  1.00  0.00      1S   
ATOM     36 CE2  TRP    52      -1.378   4.457  33.258  1.00  1.00      1S   
ATOM     37 CD2  TRP    52      -0.245   4.042  32.529  1.00  1.00      1S   
ATOM     38 CE3  TRP    52       0.546   4.963  31.860  1.00  1.00      1S   
ATOM     39 HE3  TRP    52       1.405   4.661  31.294  1.00  0.00      1S   
ATOM     40 CZ3  TRP    52       0.184   6.316  31.932  1.00  1.00      1S   
ATOM     41 HZ3  TRP    52       0.779   7.053  31.414  1.00  0.00      1S   
ATOM     42 CZ2  TRP    52      -1.744   5.792  33.331  1.00  1.00      1S   
ATOM     43 HZ2  TRP    52      -2.620   6.112  33.875  1.00  0.00      1S   
ATOM     44 CH2  TRP    52      -0.944   6.725  32.660  1.00  1.00      1S   
ATOM     45 HH2  TRP    52      -1.213   7.770  32.694  1.00  0.00      1S   
ATOM     46 C    TRP    52       1.822   0.931  29.906  1.00  1.00      1S   
ATOM     47 O    TRP    52       2.311   1.783  29.163  1.00  1.00      1S   
ATOM     48 N    PHE    53       2.402  -0.272  30.097  1.00  1.00      1S   
ATOM     49 HN   PHE    53       1.986  -0.979  30.663  1.00  0.00      1S   
ATOM     50 CA   PHE    53       3.697  -0.595  29.555  1.00  1.00      1S   
ATOM     51 HA   PHE    53       4.188   0.315  29.256  1.00  0.00      1S   
ATOM     52 CB   PHE    53       4.605  -1.352  30.556  1.00  1.00      1S   
ATOM     53 HB1  PHE    53       5.629  -1.470  30.142  1.00  0.00      1S   
ATOM     54 HB2  PHE    53       4.185  -2.355  30.780  1.00  0.00      1S   
ATOM     55 CG   PHE    53       4.717  -0.607  31.855  1.00  1.00      1S   
ATOM     56 CD1  PHE    53       5.729   0.346  32.050  1.00  1.00      1S   
ATOM     57 HD1  PHE    53       6.434   0.549  31.259  1.00  0.00      1S   
ATOM     58 CE1  PHE    53       5.835   1.027  33.269  1.00  1.00      1S   
ATOM     59 HE1  PHE    53       6.613   1.760  33.408  1.00  0.00      1S   
ATOM     60 CZ   PHE    53       4.934   0.748  34.304  1.00  1.00      1S   
ATOM     61 HZ   PHE    53       5.008   1.249  35.251  1.00  0.00      1S   
ATOM     62 CD2  PHE    53       3.818  -0.873  32.903  1.00  1.00      1S   
ATOM     63 HD2  PHE    53       3.037  -1.605  32.765  1.00  0.00      1S   
ATOM     64 CE2  PHE    53       3.925  -0.200  34.122  1.00  1.00      1S   
ATOM     65 HE2  PHE    53       3.235  -0.411  34.926  1.00  0.00      1S   
ATOM     66 C    PHE    53       3.515  -1.448  28.334  1.00  1.00      1S   
ATOM     67 O    PHE    53       2.445  -2.002  28.091  1.00  1.00      1S   
ATOM     68 N    THR    54       4.582  -1.591  27.519  1.00  1.00      1S   
ATOM     69 HN   THR    54       5.411  -1.047  27.647  1.00  0.00      1S   
ATOM     70 CA   THR    54       4.602  -2.501  26.399  1.00  1.00      1S   
ATOM     71 HA   THR    54       3.694  -2.349  25.833  1.00  0.00      1S   
ATOM     72 CB   THR    54       5.801  -2.299  25.479  1.00  1.00      1S   
ATOM     73 HB   THR    54       5.699  -2.934  24.570  1.00  0.00      1S   
ATOM     74 OG1  THR    54       7.027  -2.626  26.128  1.00  1.00      1S   
ATOM     75 HG1  THR    54       6.951  -3.557  26.362  1.00  0.00      1S   
ATOM     76 CG2  THR    54       5.859  -0.823  25.042  1.00  1.00      1S   
ATOM     77 HG21 THR    54       5.979  -0.157  25.916  1.00  0.00      1S   
ATOM     78 HG22 THR    54       4.931  -0.532  24.509  1.00  0.00      1S   
ATOM     79 HG23 THR    54       6.730  -0.654  24.375  1.00  0.00      1S   
ATOM     80 C    THR    54       4.590  -3.913  26.926  1.00  1.00      1S   
ATOM     81 O    THR    54       4.994  -4.176  28.054  1.00  1.00      1S   
ATOM     82 N    ALA    55       4.105  -4.866  26.122  1.00  1.00      1S   
ATOM     83 HN   ALA    55       3.771  -4.677  25.204  1.00  0.00      1S   
ATOM     84 CA   ALA    55       3.992  -6.214  26.587  1.00  1.00      1S   
ATOM     85 HA   ALA    55       3.774  -6.221  27.647  1.00  0.00      1S   
ATOM     86 CB   ALA    55       2.861  -6.940  25.866  1.00  1.00      1S   
ATOM     87 HB1  ALA    55       3.033  -6.954  24.768  1.00  0.00      1S   
ATOM     88 HB2  ALA    55       1.896  -6.428  26.061  1.00  0.00      1S   
ATOM     89 HB3  ALA    55       2.779  -7.983  26.233  1.00  0.00      1S   
ATOM     90 C    ALA    55       5.279  -6.953  26.359  1.00  1.00      1S   
ATOM     91 O    ALA    55       6.003  -6.701  25.397  1.00  1.00      1S   
ATOM     92 N    LEU    56       5.583  -7.903  27.266  1.00  1.00      1S   
ATOM     93 HN   LEU    56       5.038  -8.033  28.093  1.00  0.00      1S   
ATOM     94 CA   LEU    56       6.679  -8.815  27.091  1.00  1.00      1S   
ATOM     95 HA   LEU    56       7.494  -8.308  26.596  1.00  0.00      1S   
ATOM     96 CB   LEU    56       7.152  -9.408  28.431  1.00  1.00      1S   
ATOM     97 HB1  LEU    56       7.784 -10.302  28.245  1.00  0.00      1S   
ATOM     98 HB2  LEU    56       6.264  -9.727  29.020  1.00  0.00      1S   
ATOM     99 CG   LEU    56       7.988  -8.434  29.277  1.00  1.00      1S   
ATOM    100 HG   LEU    56       7.396  -7.506  29.448  1.00  0.00      1S   
ATOM    101 CD1  LEU    56       8.298  -9.057  30.646  1.00  1.00      1S   
ATOM    102 HD11 LEU    56       8.876  -9.995  30.509  1.00  0.00      1S   
ATOM    103 HD12 LEU    56       7.353  -9.292  31.179  1.00  0.00      1S   
ATOM    104 HD13 LEU    56       8.894  -8.355  31.265  1.00  0.00      1S   
ATOM    105 CD2  LEU    56       9.285  -8.045  28.550  1.00  1.00      1S   
ATOM    106 HD21 LEU    56       9.058  -7.396  27.678  1.00  0.00      1S   
ATOM    107 HD22 LEU    56       9.809  -8.956  28.193  1.00  0.00      1S   
ATOM    108 HD23 LEU    56       9.963  -7.488  29.229  1.00  0.00      1S   
ATOM    109 C    LEU    56       6.219  -9.937  26.206  1.00  1.00      1S   
ATOM    110 O    LEU    56       5.404 -10.768  26.600  1.00  1.00      1S   
ATOM    111 N    THR    57       6.741  -9.967  24.961  1.00  1.00      1S   
ATOM    112 HN   THR    57       7.382  -9.268  24.653  1.00  0.00      1S   
ATOM    113 CA   THR    57       6.365 -10.944  23.968  1.00  1.00      1S   
ATOM    114 HA   THR    57       5.284 -11.018  23.968  1.00  0.00      1S   
ATOM    115 CB   THR    57       6.841 -10.551  22.580  1.00  1.00      1S   
ATOM    116 HB   THR    57       7.953 -10.554  22.537  1.00  0.00      1S   
ATOM    117 OG1  THR    57       6.392  -9.238  22.266  1.00  1.00      1S   
ATOM    118 HG1  THR    57       6.977  -8.634  22.731  1.00  0.00      1S   
ATOM    119 CG2  THR    57       6.282 -11.520  21.521  1.00  1.00      1S   
ATOM    120 HG21 THR    57       5.184 -11.630  21.638  1.00  0.00      1S   
ATOM    121 HG22 THR    57       6.756 -12.519  21.624  1.00  0.00      1S   
ATOM    122 HG23 THR    57       6.497 -11.136  20.502  1.00  0.00      1S   
ATOM    123 C    THR    57       6.941 -12.284  24.347  1.00  1.00      1S   
ATOM    124 O    THR    57       8.099 -12.389  24.748  1.00  1.00      1S   
ATOM    125 N    GLN    58       6.109 -13.341  24.254  1.00  1.00      1S   
ATOM    126 HN   GLN    58       5.163 -13.243  23.948  1.00  0.00      1S   
ATOM    127 CA   GLN    58       6.497 -14.664  24.647  1.00  1.00      1S   
ATOM    128 HA   GLN    58       7.282 -14.613  25.387  1.00  0.00      1S   
ATOM    129 CB   GLN    58       5.301 -15.415  25.238  1.00  1.00      1S   
ATOM    130 HB1  GLN    58       4.696 -15.812  24.404  1.00  0.00      1S   
ATOM    131 HB2  GLN    58       4.655 -14.698  25.795  1.00  0.00      1S   
ATOM    132 CG   GLN    58       5.713 -16.512  26.215  1.00  1.00      1S   
ATOM    133 HG1  GLN    58       5.559 -16.119  27.241  1.00  0.00      1S   
ATOM    134 HG2  GLN    58       6.781 -16.790  26.087  1.00  0.00      1S   
ATOM    135 CD   GLN    58       4.831 -17.741  26.057  1.00  1.00      1S   
ATOM    136 OE1  GLN    58       4.187 -18.003  25.040  1.00  1.00      1S   
ATOM    137 NE2  GLN    58       4.854 -18.576  27.121  1.00  1.00      1S   
ATOM    138 HE21 GLN    58       4.241 -19.360  27.141  1.00  0.00      1S   
ATOM    139 HE22 GLN    58       5.671 -18.583  27.696  1.00  0.00      1S   
ATOM    140 C    GLN    58       6.995 -15.411  23.440  1.00  1.00      1S   
ATOM    141 O    GLN    58       6.259 -15.624  22.475  1.00  1.00      1S   
ATOM    142 N    HSD    59       8.285 -15.809  23.475  1.00  1.00      1S   
ATOM    143 HN   HSD    59       8.864 -15.626  24.266  1.00  0.00      1S   
ATOM    144 CA   HSD    59       8.921 -16.492  22.380  1.00  1.00      1S   
ATOM    145 HA   HSD    59       8.272 -16.509  21.514  1.00  0.00      1S   
ATOM    146 CB   HSD    59      10.296 -15.972  21.997  1.00  1.00      1S   
ATOM    147 HB1  HSD    59      10.726 -16.556  21.156  1.00  0.00      1S   
ATOM    148 HB2  HSD    59      10.977 -16.022  22.871  1.00  0.00      1S   
ATOM    149 ND1  HSD    59      11.159 -13.638  21.897  1.00  1.00      1S   
ATOM    150 HD1  HSD    59      11.988 -13.804  22.433  1.00  0.00      1S   
ATOM    151 CG   HSD    59      10.202 -14.573  21.592  1.00  1.00      1S   
ATOM    152 CE1  HSD    59      10.708 -12.462  21.438  1.00  1.00      1S   
ATOM    153 HE1  HSD    59      11.288 -11.541  21.494  1.00  0.00      1S   
ATOM    154 NE2  HSD    59       9.532 -12.595  20.868  1.00  1.00      1S   
ATOM    155 CD2  HSD    59       9.215 -13.921  20.943  1.00  1.00      1S   
ATOM    156 HD2  HSD    59       8.296 -14.265  20.479  1.00  0.00      1S   
ATOM    157 C    HSD    59       9.148 -17.873  22.773  1.00  1.00      1S   
ATOM    158 O    HSD    59      10.036 -18.215  23.554  1.00  1.00      1S   
ATOM    159 N    GLY    60       8.281 -18.698  22.196  1.00  1.00      1S   
ATOM    160 HN   GLY    60       7.501 -18.410  21.660  1.00  0.00      1S   
ATOM    161 CA   GLY    60       8.120 -20.022  22.555  1.00  1.00      1S   
ATOM    162 HA1  GLY    60       8.930 -20.245  23.306  1.00  0.00      1S   
ATOM    163 HA2  GLY    60       8.294 -20.654  21.700  1.00  0.00      1S   
ATOM    164 C    GLY    60       6.465 -20.135  22.805  1.00  1.00      1S   
ATOM    165 O    GLY    60       5.606 -19.493  22.321  1.00  1.00      1S   
ATOM    166 N    LYS    61       5.994 -20.832  23.867  1.00  1.00      1S   
ATOM    167 HN   LYS    61       7.034 -20.772  24.140  1.00  0.00      1S   
ATOM    168 CA   LYS    61       5.240 -22.089  24.999  1.00  1.00      1S   
ATOM    169 HA   LYS    61       4.271 -21.892  24.885  1.00  0.00      1S   
ATOM    170 CB   LYS    61       5.428 -23.675  24.860  1.00  1.00      1S   
ATOM    171 HB1  LYS    61       4.397 -23.916  24.540  1.00  0.00      1S   
ATOM    172 HB2  LYS    61       5.547 -24.270  25.811  1.00  0.00      1S   
ATOM    173 CG   LYS    61       6.362 -24.403  23.871  1.00  0.00      1S   
ATOM    174 HG1  LYS    61       5.720 -24.696  22.999  1.00  0.00      1S   
ATOM    175 HG2  LYS    61       6.842 -25.281  24.389  1.00  0.00      1S   
ATOM    176 CD   LYS    61       7.533 -23.604  23.408  1.00  0.00      1S   
ATOM    177 HD1  LYS    61       7.426 -23.524  22.256  1.00  0.00      1S   
ATOM    178 HD2  LYS    61       8.518 -24.126  23.467  1.00  0.00      1S   
ATOM    179 CE   LYS    61       7.916 -22.331  24.440  1.00  0.00      1S   
ATOM    180 HE1  LYS    61       7.463 -22.236  23.487  1.00  0.00      1S   
ATOM    181 HE2  LYS    61       8.803 -21.908  24.247  1.00  0.00      1S   
ATOM    182 NZ   LYS    61       7.310 -20.784  25.640  1.00  0.00      1S   
ATOM    183 HZ1  LYS    61       6.878 -21.338  26.433  1.00  0.00      1S   
ATOM    184 HZ2  LYS    61       6.191 -20.520  25.414  1.00  0.00      1S   
ATOM    185 HZ3  LYS    61       7.606 -19.840  25.446  1.00  0.00      1S   
ATOM    186 C    LYS    61       5.461 -22.182  26.995  1.00  1.00      1S   
ATOM    187 O    LYS    61       4.560 -22.559  27.743  1.00  1.00      1S   
ATOM    188 N    GLU    62       6.693 -22.274  27.656  1.00  1.00      1S   
ATOM    189 HN   GLU    62       7.493 -22.612  27.159  1.00  0.00      1S   
ATOM    190 CA   GLU    62       7.100 -21.726  28.948  1.00  1.00      1S   
ATOM    191 HA   GLU    62       6.553 -22.282  29.695  1.00  0.00      1S   
ATOM    192 CB   GLU    62       8.622 -21.877  29.300  1.00  1.00      1S   
ATOM    193 HB1  GLU    62       8.797 -22.894  29.707  1.00  0.00      1S   
ATOM    194 HB2  GLU    62       8.868 -21.173  30.130  1.00  0.00      1S   
ATOM    195 CG   GLU    62       9.670 -21.608  28.186  1.00  0.00      1S   
ATOM    196 HG1  GLU    62      10.663 -21.466  28.670  1.00  0.00      1S   
ATOM    197 HG2  GLU    62       9.433 -20.675  27.635  1.00  0.00      1S   
ATOM    198 CD   GLU    62       9.827 -22.765  27.194  1.00  0.00      1S   
ATOM    199 OE1  GLU    62      10.620 -22.589  26.227  1.00  0.00      1S   
ATOM    200 OE2  GLU    62       9.167 -23.820  27.367  1.00  0.00      1S   
ATOM    201 C    GLU    62       6.755 -20.255  29.129  1.00  1.00      1S   
ATOM    202 O    GLU    62       7.255 -19.356  28.454  1.00  1.00      1S   
ATOM    203 N    ASP    63       5.847 -20.056  30.098  1.00  1.00      1S   
ATOM    204 HN   ASP    63       5.532 -20.930  30.447  1.00  0.00      1S   
ATOM    205 CA   ASP    63       5.109 -18.901  30.467  1.00  1.00      1S   
ATOM    206 HA   ASP    63       4.863 -18.335  29.584  1.00  0.00      1S   
ATOM    207 CB   ASP    63       3.834 -19.323  31.216  1.00  1.00      1S   
ATOM    208 HB1  ASP    63       3.432 -18.477  31.808  1.00  0.00      1S   
ATOM    209 HB2  ASP    63       4.093 -20.159  31.904  1.00  0.00      1S   
ATOM    210 CG   ASP    63       2.736 -19.803  30.261  1.00  1.00      1S   
ATOM    211 OD1  ASP    63       2.853 -19.610  29.022  1.00  1.00      1S   
ATOM    212 OD2  ASP    63       1.733 -20.356  30.784  1.00  1.00      1S   
ATOM    213 C    ASP    63       5.962 -18.018  31.326  1.00  1.00      1S   
ATOM    214 O    ASP    63       7.016 -18.407  31.832  1.00  1.00      1S   
ATOM    215 N    LEU    64       5.519 -16.760  31.461  1.00  1.00      1S   
ATOM    216 HN   LEU    64       4.650 -16.474  31.064  1.00  0.00      1S   
ATOM    217 CA   LEU    64       6.285 -15.745  32.119  1.00  1.00      1S   
ATOM    218 HA   LEU    64       7.321 -15.861  31.833  1.00  0.00      1S   
ATOM    219 CB   LEU    64       5.776 -14.350  31.712  1.00  1.00      1S   
ATOM    220 HB1  LEU    64       4.691 -14.272  31.942  1.00  0.00      1S   
ATOM    221 HB2  LEU    64       5.879 -14.258  30.609  1.00  0.00      1S   
ATOM    222 CG   LEU    64       6.520 -13.164  32.353  1.00  1.00      1S   
ATOM    223 HG   LEU    64       6.389 -13.218  33.458  1.00  0.00      1S   
ATOM    224 CD1  LEU    64       8.027 -13.205  32.056  1.00  1.00      1S   
ATOM    225 HD11 LEU    64       8.197 -13.331  30.969  1.00  0.00      1S   
ATOM    226 HD12 LEU    64       8.507 -14.052  32.585  1.00  0.00      1S   
ATOM    227 HD13 LEU    64       8.514 -12.266  32.385  1.00  0.00      1S   
ATOM    228 CD2  LEU    64       5.894 -11.842  31.891  1.00  1.00      1S   
ATOM    229 HD21 LEU    64       4.821 -11.807  32.176  1.00  0.00      1S   
ATOM    230 HD22 LEU    64       5.983 -11.744  30.789  1.00  0.00      1S   
ATOM    231 HD23 LEU    64       6.415 -10.988  32.367  1.00  0.00      1S   
ATOM    232 C    LEU    64       6.178 -15.917  33.603  1.00  1.00      1S   
ATOM    233 O    LEU    64       5.110 -16.230  34.120  1.00  1.00      1S   
ATOM    234 N    LYS    65       7.309 -15.731  34.315  1.00  1.00      1S   
ATOM    235 HN   LYS    65       8.182 -15.534  33.876  1.00  0.00      1S   
ATOM    236 CA   LYS    65       7.315 -15.762  35.747  1.00  1.00      1S   
ATOM    237 HA   LYS    65       6.437 -15.246  36.109  1.00  0.00      1S   
ATOM    238 CB   LYS    65       7.331 -17.203  36.304  1.00  1.00      1S   
ATOM    239 HB1  LYS    65       6.724 -17.850  35.628  1.00  0.00      1S   
ATOM    240 HB2  LYS    65       6.834 -17.206  37.297  1.00  0.00      1S   
ATOM    241 CG   LYS    65       8.719 -17.836  36.439  1.00  1.00      1S   
ATOM    242 HG1  LYS    65       9.437 -17.131  36.912  1.00  0.00      1S   
ATOM    243 HG2  LYS    65       9.106 -18.094  35.430  1.00  0.00      1S   
ATOM    244 CD   LYS    65       8.707 -19.058  37.352  1.00  1.00      1S   
ATOM    245 HD1  LYS    65       8.133 -19.875  36.866  1.00  0.00      1S   
ATOM    246 HD2  LYS    65       8.186 -18.785  38.299  1.00  0.00      1S   
ATOM    247 CE   LYS    65      10.127 -19.509  37.694  1.00  1.00      1S   
ATOM    248 HE1  LYS    65      10.099 -20.419  38.325  1.00  0.00      1S   
ATOM    249 HE2  LYS    65      10.666 -18.697  38.228  1.00  0.00      1S   
ATOM    250 NZ   LYS    65      10.885 -19.817  36.459  1.00  1.00      1S   
ATOM    251 HZ1  LYS    65      10.934 -18.965  35.863  1.00  0.00      1S   
ATOM    252 HZ2  LYS    65      10.398 -20.572  35.935  1.00  0.00      1S   
ATOM    253 HZ3  LYS    65      11.846 -20.123  36.707  1.00  0.00      1S   
ATOM    254 C    LYS    65       8.520 -15.000  36.216  1.00  1.00      1S   
ATOM    255 O    LYS    65       9.501 -14.858  35.485  1.00  1.00      1S   
ATOM    256 N    PHE    66       8.476 -14.515  37.475  1.00  1.00      1S   
ATOM    257 HN   PHE    66       7.678 -14.640  38.060  1.00  0.00      1S   
ATOM    258 CA   PHE    66       9.580 -13.790  38.051  1.00  1.00      1S   
ATOM    259 HA   PHE    66      10.463 -13.971  37.462  1.00  0.00      1S   
ATOM    260 CB   PHE    66       9.301 -12.277  38.146  1.00  1.00      1S   
ATOM    261 HB1  PHE    66      10.050 -11.772  38.792  1.00  0.00      1S   
ATOM    262 HB2  PHE    66       8.290 -12.111  38.568  1.00  0.00      1S   
ATOM    263 CG   PHE    66       9.364 -11.631  36.796  1.00  1.00      1S   
ATOM    264 CD1  PHE    66      10.580 -11.121  36.314  1.00  1.00      1S   
ATOM    265 HD1  PHE    66      11.477 -11.210  36.910  1.00  0.00      1S   
ATOM    266 CE1  PHE    66      10.630 -10.470  35.077  1.00  1.00      1S   
ATOM    267 HE1  PHE    66      11.560 -10.071  34.715  1.00  0.00      1S   
ATOM    268 CZ   PHE    66       9.472 -10.325  34.307  1.00  1.00      1S   
ATOM    269 HZ   PHE    66       9.518  -9.829  33.349  1.00  0.00      1S   
ATOM    270 CD2  PHE    66       8.204 -11.480  36.018  1.00  1.00      1S   
ATOM    271 HD2  PHE    66       7.261 -11.861  36.380  1.00  0.00      1S   
ATOM    272 CE2  PHE    66       8.257 -10.827  34.783  1.00  1.00      1S   
ATOM    273 HE2  PHE    66       7.359 -10.712  34.201  1.00  0.00      1S   
ATOM    274 C    PHE    66       9.809 -14.289  39.455  1.00  1.00      1S   
ATOM    275 O    PHE    66       8.856 -14.711  40.113  1.00  1.00      1S   
ATOM    276 N    PRO    67      11.038 -14.230  39.979  1.00  1.00      1S   
ATOM    277 CD   PRO    67      12.273 -14.056  39.207  1.00  1.00      1S   
ATOM    278 HD1  PRO    67      12.468 -12.970  39.073  1.00  0.00      1S   
ATOM    279 HD2  PRO    67      12.225 -14.565  38.220  1.00  0.00      1S   
ATOM    280 CA   PRO    67      11.312 -14.518  41.377  1.00  1.00      1S   
ATOM    281 HA   PRO    67      10.882 -15.476  41.634  1.00  0.00      1S   
ATOM    282 CB   PRO    67      12.848 -14.491  41.491  1.00  1.00      1S   
ATOM    283 HB1  PRO    67      13.219 -15.292  42.163  1.00  0.00      1S   
ATOM    284 HB2  PRO    67      13.216 -13.507  41.858  1.00  0.00      1S   
ATOM    285 CG   PRO    67      13.358 -14.699  40.064  1.00  1.00      1S   
ATOM    286 HG1  PRO    67      14.351 -14.234  39.901  1.00  0.00      1S   
ATOM    287 HG2  PRO    67      13.408 -15.787  39.838  1.00  0.00      1S   
ATOM    288 C    PRO    67      10.709 -13.464  42.266  1.00  1.00      1S   
ATOM    289 O    PRO    67      10.191 -12.458  41.782  1.00  1.00      1S   
ATOM    290 N    ARG    68      10.783 -13.678  43.589  1.00  1.00      1S   
ATOM    291 HN   ARG    68      11.203 -14.502  43.961  1.00  0.00      1S   
ATOM    292 CA   ARG    68      10.245 -12.749  44.543  1.00  1.00      1S   
ATOM    293 HA   ARG    68       9.239 -12.490  44.238  1.00  0.00      1S   
ATOM    294 CB   ARG    68      10.198 -13.391  45.936  1.00  1.00      1S   
ATOM    295 HB1  ARG    68      11.225 -13.684  46.248  1.00  0.00      1S   
ATOM    296 HB2  ARG    68       9.595 -14.323  45.850  1.00  0.00      1S   
ATOM    297 CG   ARG    68       9.582 -12.494  47.018  1.00  1.00      1S   
ATOM    298 HG1  ARG    68       8.546 -12.217  46.722  1.00  0.00      1S   
ATOM    299 HG2  ARG    68      10.178 -11.557  47.100  1.00  0.00      1S   
ATOM    300 CD   ARG    68       9.572 -13.158  48.394  1.00  1.00      1S   
ATOM    301 HD1  ARG    68       9.023 -12.523  49.122  1.00  0.00      1S   
ATOM    302 HD2  ARG    68      10.613 -13.339  48.741  1.00  0.00      1S   
ATOM    303 NE   ARG    68       8.877 -14.476  48.280  1.00  1.00      1S   
ATOM    304 HE   ARG    68       8.622 -14.816  47.376  1.00  0.00      1S   
ATOM    305 CZ   ARG    68       8.623 -15.251  49.368  1.00  1.00      1S   
ATOM    306 NH1  ARG    68       8.009 -16.450  49.202  1.00  1.00      1S   
ATOM    307 HH11 ARG    68       7.755 -16.750  48.285  1.00  0.00      1S   
ATOM    308 HH12 ARG    68       7.811 -17.017  49.999  1.00  0.00      1S   
ATOM    309 NH2  ARG    68       8.973 -14.835  50.612  1.00  1.00      1S   
ATOM    310 HH21 ARG    68       9.424 -13.951  50.722  1.00  0.00      1S   
ATOM    311 HH22 ARG    68       8.771 -15.407  51.403  1.00  0.00      1S   
ATOM    312 C    ARG    68      11.088 -11.500  44.587  1.00  1.00      1S   
ATOM    313 O    ARG    68      12.305 -11.565  44.749  1.00  1.00      1S   
ATOM    314 N    GLY    69      10.434 -10.328  44.413  1.00  1.00      1S   
ATOM    315 HN   GLY    69       9.446 -10.304  44.277  1.00  0.00      1S   
ATOM    316 CA   GLY    69      11.096  -9.044  44.468  1.00  1.00      1S   
ATOM    317 HA1  GLY    69      12.071  -9.153  44.919  1.00  0.00      1S   
ATOM    318 HA2  GLY    69      10.450  -8.390  45.034  1.00  0.00      1S   
ATOM    319 C    GLY    69      11.267  -8.439  43.105  1.00  1.00      1S   
ATOM    320 O    GLY    69      11.355  -7.218  42.984  1.00  1.00      1S   
ATOM    321 N    GLN    70      11.343  -9.271  42.042  1.00  1.00      1S   
ATOM    322 HN   GLN    70      11.281 -10.262  42.150  1.00  0.00      1S   
ATOM    323 CA   GLN    70      11.574  -8.799  40.696  1.00  1.00      1S   
ATOM    324 HA   GLN    70      11.854  -7.755  40.709  1.00  0.00      1S   
ATOM    325 CB   GLN    70      12.694  -9.600  39.993  1.00  1.00      1S   
ATOM    326 HB1  GLN    70      12.892  -9.151  38.996  1.00  0.00      1S   
ATOM    327 HB2  GLN    70      12.356 -10.651  39.849  1.00  0.00      1S   
ATOM    328 CG   GLN    70      14.008  -9.603  40.796  1.00  1.00      1S   
ATOM    329 HG1  GLN    70      13.820  -9.966  41.830  1.00  0.00      1S   
ATOM    330 HG2  GLN    70      14.415  -8.571  40.847  1.00  0.00      1S   
ATOM    331 CD   GLN    70      15.039 -10.528  40.145  1.00  1.00      1S   
ATOM    332 OE1  GLN    70      14.767 -11.227  39.163  1.00  1.00      1S   
ATOM    333 NE2  GLN    70      16.271 -10.527  40.733  1.00  1.00      1S   
ATOM    334 HE21 GLN    70      16.993 -11.111  40.365  1.00  0.00      1S   
ATOM    335 HE22 GLN    70      16.440  -9.945  41.527  1.00  0.00      1S   
ATOM    336 C    GLN    70      10.306  -8.930  39.899  1.00  1.00      1S   
ATOM    337 O    GLN    70       9.431  -9.729  40.230  1.00  1.00      1S   
ATOM    338 N    GLY    71      10.193  -8.131  38.810  1.00  1.00      1S   
ATOM    339 HN   GLY    71      10.885  -7.444  38.604  1.00  0.00      1S   
ATOM    340 CA   GLY    71       9.145  -8.296  37.829  1.00  1.00      1S   
ATOM    341 HA1  GLY    71       8.448  -9.046  38.165  1.00  0.00      1S   
ATOM    342 HA2  GLY    71       9.624  -8.568  36.902  1.00  0.00      1S   
ATOM    343 C    GLY    71       8.365  -7.052  37.567  1.00  1.00      1S   
ATOM    344 O    GLY    71       7.681  -6.966  36.549  1.00  1.00      1S   
ATOM    345 N    VAL    72       8.417  -6.052  38.474  1.00  1.00      1S   
ATOM    346 HN   VAL    72       8.983  -6.102  39.292  1.00  0.00      1S   
ATOM    347 CA   VAL    72       7.596  -4.872  38.342  1.00  1.00      1S   
ATOM    348 HA   VAL    72       6.640  -5.183  37.958  1.00  0.00      1S   
ATOM    349 CB   VAL    72       7.330  -4.182  39.667  1.00  1.00      1S   
ATOM    350 HB   VAL    72       8.280  -3.788  40.095  1.00  0.00      1S   
ATOM    351 CG1  VAL    72       6.339  -3.020  39.461  1.00  1.00      1S   
ATOM    352 HG11 VAL    72       5.452  -3.357  38.888  1.00  0.00      1S   
ATOM    353 HG12 VAL    72       6.826  -2.182  38.921  1.00  0.00      1S   
ATOM    354 HG13 VAL    72       5.987  -2.649  40.445  1.00  0.00      1S   
ATOM    355 CG2  VAL    72       6.752  -5.207  40.659  1.00  1.00      1S   
ATOM    356 HG21 VAL    72       7.463  -6.039  40.841  1.00  0.00      1S   
ATOM    357 HG22 VAL    72       5.796  -5.618  40.275  1.00  0.00      1S   
ATOM    358 HG23 VAL    72       6.554  -4.710  41.631  1.00  0.00      1S   
ATOM    359 C    VAL    72       8.285  -3.917  37.393  1.00  1.00      1S   
ATOM    360 O    VAL    72       9.465  -3.630  37.606  1.00  1.00      1S   
ATOM    361 N    PRO    73       7.636  -3.398  36.345  1.00  1.00      1S   
ATOM    362 CD   PRO    73       6.296  -3.784  35.895  1.00  1.00      1S   
ATOM    363 HD1  PRO    73       5.551  -3.157  36.430  1.00  0.00      1S   
ATOM    364 HD2  PRO    73       6.083  -4.862  36.058  1.00  0.00      1S   
ATOM    365 CA   PRO    73       8.273  -2.495  35.407  1.00  1.00      1S   
ATOM    366 HA   PRO    73       9.181  -2.947  35.040  1.00  0.00      1S   
ATOM    367 CB   PRO    73       7.233  -2.278  34.298  1.00  1.00      1S   
ATOM    368 HB1  PRO    73       7.705  -2.223  33.298  1.00  0.00      1S   
ATOM    369 HB2  PRO    73       6.646  -1.353  34.477  1.00  0.00      1S   
ATOM    370 CG   PRO    73       6.287  -3.473  34.405  1.00  1.00      1S   
ATOM    371 HG1  PRO    73       5.271  -3.246  34.027  1.00  0.00      1S   
ATOM    372 HG2  PRO    73       6.712  -4.336  33.848  1.00  0.00      1S   
ATOM    373 C    PRO    73       8.616  -1.192  36.073  1.00  1.00      1S   
ATOM    374 O    PRO    73       7.958  -0.797  37.035  1.00  1.00      1S   
ATOM    375 N    ILE    74       9.661  -0.521  35.565  1.00  1.00      1S   
ATOM    376 HN   ILE    74      10.181  -0.897  34.796  1.00  0.00      1S   
ATOM    377 CA   ILE    74      10.162   0.712  36.100  1.00  1.00      1S   
ATOM    378 HA   ILE    74      10.229   0.610  37.173  1.00  0.00      1S   
ATOM    379 CB   ILE    74      11.538   1.052  35.537  1.00  1.00      1S   
ATOM    380 HB   ILE    74      11.497   0.997  34.424  1.00  0.00      1S   
ATOM    381 CG2  ILE    74      11.955   2.481  35.938  1.00  1.00      1S   
ATOM    382 HG21 ILE    74      11.996   2.558  37.045  1.00  0.00      1S   
ATOM    383 HG22 ILE    74      11.244   3.234  35.544  1.00  0.00      1S   
ATOM    384 HG23 ILE    74      12.953   2.726  35.521  1.00  0.00      1S   
ATOM    385 CG1  ILE    74      12.581   0.021  36.029  1.00  1.00      1S   
ATOM    386 HG11 ILE    74      12.264  -1.001  35.736  1.00  0.00      1S   
ATOM    387 HG12 ILE    74      12.622   0.048  37.139  1.00  0.00      1S   
ATOM    388 CD   ILE    74      13.983   0.268  35.469  1.00  1.00      1S   
ATOM    389 HD1  ILE    74      14.428   1.182  35.914  1.00  0.00      1S   
ATOM    390 HD2  ILE    74      13.937   0.400  34.369  1.00  0.00      1S   
ATOM    391 HD3  ILE    74      14.647  -0.590  35.700  1.00  0.00      1S   
ATOM    392 C    ILE    74       9.168   1.792  35.774  1.00  1.00      1S   
ATOM    393 O    ILE    74       8.713   1.912  34.639  1.00  1.00      1S   
ATOM    394 N    ASN    75       8.806   2.598  36.792  1.00  1.00      1S   
ATOM    395 HN   ASN    75       9.143   2.457  37.720  1.00  0.00      1S   
ATOM    396 CA   ASN    75       7.942   3.722  36.588  1.00  1.00      1S   
ATOM    397 HA   ASN    75       8.066   4.094  35.579  1.00  0.00      1S   
ATOM    398 CB   ASN    75       6.466   3.343  36.827  1.00  1.00      1S   
ATOM    399 HB1  ASN    75       6.326   2.971  37.859  1.00  0.00      1S   
ATOM    400 HB2  ASN    75       6.225   2.507  36.144  1.00  0.00      1S   
ATOM    401 CG   ASN    75       5.503   4.496  36.524  1.00  1.00      1S   
ATOM    402 OD1  ASN    75       5.881   5.522  35.949  1.00  1.00      1S   
ATOM    403 ND2  ASN    75       4.218   4.309  36.935  1.00  1.00      1S   
ATOM    404 HD21 ASN    75       3.562   5.055  36.838  1.00  0.00      1S   
ATOM    405 HD22 ASN    75       3.979   3.479  37.439  1.00  0.00      1S   
ATOM    406 C    ASN    75       8.396   4.785  37.545  1.00  1.00      1S   
ATOM    407 O    ASN    75       8.134   4.736  38.741  1.00  1.00      1S   
ATOM    408 N    THR    76       9.081   5.818  37.026  1.00  1.00      1S   
ATOM    409 HN   THR    76       9.354   5.830  36.067  1.00  0.00      1S   
ATOM    410 CA   THR    76       9.527   6.949  37.812  1.00  1.00      1S   
ATOM    411 HA   THR    76      10.059   6.557  38.669  1.00  0.00      1S   
ATOM    412 CB   THR    76      10.463   7.849  37.017  1.00  1.00      1S   
ATOM    413 HB   THR    76      10.817   8.692  37.651  1.00  0.00      1S   
ATOM    414 OG1  THR    76       9.826   8.382  35.859  1.00  1.00      1S   
ATOM    415 HG1  THR    76       9.374   9.177  36.151  1.00  0.00      1S   
ATOM    416 CG2  THR    76      11.688   7.031  36.560  1.00  1.00      1S   
ATOM    417 HG21 THR    76      11.390   6.184  35.908  1.00  0.00      1S   
ATOM    418 HG22 THR    76      12.238   6.630  37.437  1.00  0.00      1S   
ATOM    419 HG23 THR    76      12.377   7.682  35.980  1.00  0.00      1S   
ATOM    420 C    THR    76       8.370   7.768  38.357  1.00  1.00      1S   
ATOM    421 O    THR    76       8.519   8.458  39.362  1.00  1.00      1S   
ATOM    422 N    ASN    77       7.179   7.687  37.715  1.00  1.00      1S   
ATOM    423 HN   ASN    77       7.079   7.134  36.888  1.00  0.00      1S   
ATOM    424 CA   ASN    77       5.993   8.387  38.148  1.00  1.00      1S   
ATOM    425 HA   ASN    77       6.302   9.252  38.719  1.00  0.00      1S   
ATOM    426 CB   ASN    77       5.176   8.829  36.907  1.00  1.00      1S   
ATOM    427 HB1  ASN    77       4.612   7.968  36.487  1.00  0.00      1S   
ATOM    428 HB2  ASN    77       5.883   9.185  36.126  1.00  0.00      1S   
ATOM    429 CG   ASN    77       4.224   9.984  37.239  1.00  1.00      1S   
ATOM    430 OD1  ASN    77       4.405  10.719  38.215  1.00  1.00      1S   
ATOM    431 ND2  ASN    77       3.176  10.138  36.380  1.00  1.00      1S   
ATOM    432 HD21 ASN    77       2.514  10.867  36.546  1.00  0.00      1S   
ATOM    433 HD22 ASN    77       3.076   9.514  35.607  1.00  0.00      1S   
ATOM    434 C    ASN    77       5.139   7.505  39.044  1.00  1.00      1S   
ATOM    435 O    ASN    77       3.916   7.454  38.904  1.00  1.00      1S   
ATOM    436 N    SER    78       5.765   6.790  40.005  1.00  1.00      1S   
ATOM    437 HN   SER    78       6.754   6.843  40.134  1.00  0.00      1S   
ATOM    438 CA   SER    78       5.043   5.912  40.896  1.00  1.00      1S   
ATOM    439 HA   SER    78       4.076   6.346  41.107  1.00  0.00      1S   
ATOM    440 CB   SER    78       4.838   4.495  40.317  1.00  1.00      1S   
ATOM    441 HB1  SER    78       4.315   4.592  39.347  1.00  0.00      1S   
ATOM    442 HB2  SER    78       4.215   3.869  40.984  1.00  0.00      1S   
ATOM    443 OG   SER    78       6.070   3.821  40.119  1.00  1.00      1S   
ATOM    444 HG1  SER    78       6.668   4.473  39.725  1.00  0.00      1S   
ATOM    445 C    SER    78       5.792   5.805  42.188  1.00  1.00      1S   
ATOM    446 O    SER    78       7.010   5.972  42.235  1.00  1.00      1S   
ATOM    447 N    SER    79       5.055   5.504  43.277  1.00  1.00      1S   
ATOM    448 HN   SER    79       4.071   5.350  43.216  1.00  0.00      1S   
ATOM    449 CA   SER    79       5.626   5.413  44.596  1.00  1.00      1S   
ATOM    450 HA   SER    79       6.493   6.051  44.623  1.00  0.00      1S   
ATOM    451 CB   SER    79       4.635   5.896  45.674  1.00  1.00      1S   
ATOM    452 HB1  SER    79       4.299   6.923  45.409  1.00  0.00      1S   
ATOM    453 HB2  SER    79       5.108   5.918  46.673  1.00  0.00      1S   
ATOM    454 OG   SER    79       3.490   5.070  45.768  1.00  1.00      1S   
ATOM    455 HG1  SER    79       3.777   4.208  46.075  1.00  0.00      1S   
ATOM    456 C    SER    79       6.032   3.989  44.897  1.00  1.00      1S   
ATOM    457 O    SER    79       5.517   3.078  44.254  1.00  1.00      1S   
ATOM    458 N    PRO    80       6.893   3.731  45.884  1.00  1.00      1S   
ATOM    459 CD   PRO    80       7.733   4.746  46.531  1.00  1.00      1S   
ATOM    460 HD1  PRO    80       7.168   5.188  47.380  1.00  0.00      1S   
ATOM    461 HD2  PRO    80       8.055   5.548  45.830  1.00  0.00      1S   
ATOM    462 CA   PRO    80       7.326   2.378  46.214  1.00  1.00      1S   
ATOM    463 HA   PRO    80       7.698   1.911  45.314  1.00  0.00      1S   
ATOM    464 CB   PRO    80       8.398   2.577  47.296  1.00  1.00      1S   
ATOM    465 HB1  PRO    80       9.197   1.812  47.224  1.00  0.00      1S   
ATOM    466 HB2  PRO    80       7.951   2.554  48.316  1.00  0.00      1S   
ATOM    467 CG   PRO    80       8.948   3.982  47.043  1.00  1.00      1S   
ATOM    468 HG1  PRO    80       9.374   4.437  47.959  1.00  0.00      1S   
ATOM    469 HG2  PRO    80       9.720   3.943  46.244  1.00  0.00      1S   
ATOM    470 C    PRO    80       6.212   1.517  46.744  1.00  1.00      1S   
ATOM    471 O    PRO    80       6.293   0.296  46.624  1.00  1.00      1S   
ATOM    472 N    ASP    81       5.147   2.126  47.307  1.00  1.00      1S   
ATOM    473 HN   ASP    81       5.122   3.112  47.454  1.00  0.00      1S   
ATOM    474 CA   ASP    81       4.015   1.392  47.809  1.00  1.00      1S   
ATOM    475 HA   ASP    81       4.377   0.555  48.390  1.00  0.00      1S   
ATOM    476 CB   ASP    81       3.105   2.282  48.685  1.00  1.00      1S   
ATOM    477 HB1  ASP    81       2.224   1.700  49.026  1.00  0.00      1S   
ATOM    478 HB2  ASP    81       2.751   3.157  48.100  1.00  0.00      1S   
ATOM    479 CG   ASP    81       3.861   2.782  49.918  1.00  1.00      1S   
ATOM    480 OD1  ASP    81       4.792   2.076  50.386  1.00  1.00      1S   
ATOM    481 OD2  ASP    81       3.503   3.885  50.409  1.00  1.00      1S   
ATOM    482 C    ASP    81       3.196   0.813  46.689  1.00  1.00      1S   
ATOM    483 O    ASP    81       2.428  -0.114  46.920  1.00  1.00      1S   
ATOM    484 N    ASP    82       3.366   1.321  45.448  1.00  1.00      1S   
ATOM    485 HN   ASP    82       4.049   2.023  45.256  1.00  0.00      1S   
ATOM    486 CA   ASP    82       2.562   0.931  44.323  1.00  1.00      1S   
ATOM    487 HA   ASP    82       1.622   0.585  44.679  1.00  0.00      1S   
ATOM    488 CB   ASP    82       2.284   2.089  43.364  1.00  1.00      1S   
ATOM    489 HB1  ASP    82       1.596   1.777  42.549  1.00  0.00      1S   
ATOM    490 HB2  ASP    82       3.240   2.446  42.919  1.00  0.00      1S   
ATOM    491 CG   ASP    82       1.638   3.253  44.088  1.00  1.00      1S   
ATOM    492 OD1  ASP    82       0.797   3.079  45.009  1.00  1.00      1S   
ATOM    493 OD2  ASP    82       1.993   4.383  43.668  1.00  1.00      1S   
ATOM    494 C    ASP    82       3.170  -0.170  43.514  1.00  1.00      1S   
ATOM    495 O    ASP    82       2.533  -0.642  42.577  1.00  1.00      1S   
ATOM    496 N    GLN    83       4.402  -0.608  43.843  1.00  1.00      1S   
ATOM    497 HN   GLN    83       4.877  -0.250  44.645  1.00  0.00      1S   
ATOM    498 CA   GLN    83       5.166  -1.522  43.028  1.00  1.00      1S   
ATOM    499 HA   GLN    83       5.000  -1.276  41.989  1.00  0.00      1S   
ATOM    500 CB   GLN    83       6.669  -1.357  43.341  1.00  1.00      1S   
ATOM    501 HB1  GLN    83       7.093  -2.321  43.657  1.00  0.00      1S   
ATOM    502 HB2  GLN    83       6.791  -0.665  44.202  1.00  0.00      1S   
ATOM    503 CG   GLN    83       7.540  -0.862  42.173  1.00  1.00      1S   
ATOM    504 HG1  GLN    83       7.556  -1.636  41.382  1.00  0.00      1S   
ATOM    505 HG2  GLN    83       8.581  -0.716  42.529  1.00  0.00      1S   
ATOM    506 CD   GLN    83       7.015   0.459  41.614  1.00  1.00      1S   
ATOM    507 OE1  GLN    83       6.664   1.373  42.363  1.00  1.00      1S   
ATOM    508 NE2  GLN    83       6.970   0.556  40.254  1.00  1.00      1S   
ATOM    509 HE21 GLN    83       6.657   1.410  39.842  1.00  0.00      1S   
ATOM    510 HE22 GLN    83       7.287  -0.209  39.692  1.00  0.00      1S   
ATOM    511 C    GLN    83       4.700  -2.951  43.229  1.00  1.00      1S   
ATOM    512 O    GLN    83       5.359  -3.779  43.854  1.00  1.00      1S   
ATOM    513 N    ILE    84       3.511  -3.262  42.683  1.00  1.00      1S   
ATOM    514 HN   ILE    84       2.982  -2.567  42.197  1.00  0.00      1S   
ATOM    515 CA   ILE    84       2.874  -4.531  42.876  1.00  1.00      1S   
ATOM    516 HA   ILE    84       3.596  -5.294  42.630  1.00  0.00      1S   
ATOM    517 CB   ILE    84       2.365  -4.733  44.303  1.00  1.00      1S   
ATOM    518 HB   ILE    84       3.244  -4.678  44.988  1.00  0.00      1S   
ATOM    519 CG2  ILE    84       1.389  -3.613  44.712  1.00  1.00      1S   
ATOM    520 HG21 ILE    84       0.428  -3.732  44.171  1.00  0.00      1S   
ATOM    521 HG22 ILE    84       1.808  -2.611  44.493  1.00  0.00      1S   
ATOM    522 HG23 ILE    84       1.184  -3.666  45.800  1.00  0.00      1S   
ATOM    523 CG1  ILE    84       1.738  -6.125  44.491  1.00  1.00      1S   
ATOM    524 HG11 ILE    84       2.492  -6.889  44.214  1.00  0.00      1S   
ATOM    525 HG12 ILE    84       0.872  -6.235  43.803  1.00  0.00      1S   
ATOM    526 CD   ILE    84       1.259  -6.372  45.919  1.00  1.00      1S   
ATOM    527 HD1  ILE    84       0.374  -5.739  46.141  1.00  0.00      1S   
ATOM    528 HD2  ILE    84       2.061  -6.127  46.647  1.00  0.00      1S   
ATOM    529 HD3  ILE    84       0.968  -7.434  46.043  1.00  0.00      1S   
ATOM    530 C    ILE    84       1.762  -4.618  41.865  1.00  1.00      1S   
ATOM    531 O    ILE    84       1.052  -3.646  41.607  1.00  1.00      1S   
ATOM    532 N    GLY    85       1.602  -5.805  41.242  1.00  1.00      1S   
ATOM    533 HN   GLY    85       2.155  -6.604  41.475  1.00  0.00      1S   
ATOM    534 CA   GLY    85       0.612  -5.976  40.215  1.00  1.00      1S   
ATOM    535 HA1  GLY    85       0.774  -5.222  39.460  1.00  0.00      1S   
ATOM    536 HA2  GLY    85      -0.361  -5.932  40.679  1.00  0.00      1S   
ATOM    537 C    GLY    85       0.758  -7.319  39.586  1.00  1.00      1S   
ATOM    538 O    GLY    85       1.284  -8.251  40.190  1.00  1.00      1S   
ATOM    539 N    TYR    86       0.258  -7.446  38.341  1.00  1.00      1S   
ATOM    540 HN   TYR    86      -0.118  -6.659  37.847  1.00  0.00      1S   
ATOM    541 CA   TYR    86       0.147  -8.718  37.679  1.00  1.00      1S   
ATOM    542 HA   TYR    86       0.940  -9.357  38.036  1.00  0.00      1S   
ATOM    543 CB   TYR    86      -1.221  -9.405  37.940  1.00  1.00      1S   
ATOM    544 HB1  TYR    86      -1.351  -9.513  39.028  1.00  0.00      1S   
ATOM    545 HB2  TYR    86      -1.242 -10.419  37.493  1.00  0.00      1S   
ATOM    546 CG   TYR    86      -2.410  -8.642  37.427  1.00  1.00      1S   
ATOM    547 CD1  TYR    86      -2.896  -8.915  36.139  1.00  1.00      1S   
ATOM    548 HD1  TYR    86      -2.414  -9.660  35.525  1.00  0.00      1S   
ATOM    549 CE1  TYR    86      -3.997  -8.227  35.636  1.00  1.00      1S   
ATOM    550 HE1  TYR    86      -4.365  -8.431  34.641  1.00  0.00      1S   
ATOM    551 CZ   TYR    86      -4.617  -7.261  36.424  1.00  1.00      1S   
ATOM    552 OH   TYR    86      -5.690  -6.566  35.868  1.00  1.00      1S   
ATOM    553 HH   TYR    86      -5.928  -5.869  36.493  1.00  0.00      1S   
ATOM    554 CD2  TYR    86      -3.053  -7.670  38.215  1.00  1.00      1S   
ATOM    555 HD2  TYR    86      -2.690  -7.450  39.207  1.00  0.00      1S   
ATOM    556 CE2  TYR    86      -4.160  -6.976  37.716  1.00  1.00      1S   
ATOM    557 HE2  TYR    86      -4.648  -6.227  38.322  1.00  0.00      1S   
ATOM    558 C    TYR    86       0.354  -8.560  36.206  1.00  1.00      1S   
ATOM    559 O    TYR    86       0.250  -7.464  35.674  1.00  1.00      1S   
ATOM    560 N    TYR    87       0.629  -9.683  35.513  1.00  1.00      1S   
ATOM    561 HN   TYR    87       0.762 -10.548  35.991  1.00  0.00      1S   
ATOM    562 CA   TYR    87       0.715  -9.737  34.074  1.00  1.00      1S   
ATOM    563 HA   TYR    87       0.606  -8.750  33.654  1.00  0.00      1S   
ATOM    564 CB   TYR    87       2.030 -10.380  33.595  1.00  1.00      1S   
ATOM    565 HB1  TYR    87       1.954 -10.698  32.536  1.00  0.00      1S   
ATOM    566 HB2  TYR    87       2.253 -11.264  34.217  1.00  0.00      1S   
ATOM    567 CG   TYR    87       3.196  -9.447  33.691  1.00  1.00      1S   
ATOM    568 CD1  TYR    87       3.522  -8.635  32.595  1.00  1.00      1S   
ATOM    569 HD1  TYR    87       2.906  -8.649  31.709  1.00  0.00      1S   
ATOM    570 CE1  TYR    87       4.650  -7.814  32.631  1.00  1.00      1S   
ATOM    571 HE1  TYR    87       4.860  -7.183  31.784  1.00  0.00      1S   
ATOM    572 CZ   TYR    87       5.449  -7.769  33.779  1.00  1.00      1S   
ATOM    573 OH   TYR    87       6.561  -6.908  33.839  1.00  1.00      1S   
ATOM    574 HH   TYR    87       6.961  -7.003  34.709  1.00  0.00      1S   
ATOM    575 CD2  TYR    87       4.018  -9.417  34.831  1.00  1.00      1S   
ATOM    576 HD2  TYR    87       3.790 -10.048  35.676  1.00  0.00      1S   
ATOM    577 CE2  TYR    87       5.139  -8.579  34.878  1.00  1.00      1S   
ATOM    578 HE2  TYR    87       5.752  -8.552  35.766  1.00  0.00      1S   
ATOM    579 C    TYR    87      -0.413 -10.598  33.561  1.00  1.00      1S   
ATOM    580 O    TYR    87      -0.675 -11.670  34.100  1.00  1.00      1S   
ATOM    581 N    ARG    88      -1.100 -10.138  32.490  1.00  1.00      1S   
ATOM    582 HN   ARG    88      -0.878  -9.251  32.083  1.00  0.00      1S   
ATOM    583 CA   ARG    88      -2.201 -10.842  31.876  1.00  1.00      1S   
ATOM    584 HA   ARG    88      -2.442 -11.721  32.451  1.00  0.00      1S   
ATOM    585 CB   ARG    88      -3.454  -9.958  31.777  1.00  1.00      1S   
ATOM    586 HB1  ARG    88      -3.231  -9.088  31.127  1.00  0.00      1S   
ATOM    587 HB2  ARG    88      -3.690  -9.572  32.794  1.00  0.00      1S   
ATOM    588 CG   ARG    88      -4.703 -10.662  31.230  1.00  1.00      1S   
ATOM    589 HG1  ARG    88      -4.905 -11.563  31.849  1.00  0.00      1S   
ATOM    590 HG2  ARG    88      -4.508 -10.993  30.185  1.00  0.00      1S   
ATOM    591 CD   ARG    88      -5.906  -9.712  31.250  1.00  1.00      1S   
ATOM    592 HD1  ARG    88      -5.726  -8.849  30.575  1.00  0.00      1S   
ATOM    593 HD2  ARG    88      -6.074  -9.340  32.283  1.00  0.00      1S   
ATOM    594 NE   ARG    88      -7.153 -10.426  30.835  1.00  1.00      1S   
ATOM    595 HE   ARG    88      -7.668 -10.924  31.534  1.00  0.00      1S   
ATOM    596 CZ   ARG    88      -7.581 -10.505  29.545  1.00  1.00      1S   
ATOM    597 NH1  ARG    88      -6.995  -9.840  28.520  1.00  1.00      1S   
ATOM    598 HH11 ARG    88      -6.397 -10.413  27.932  1.00  0.00      1S   
ATOM    599 HH12 ARG    88      -6.699  -8.897  28.620  1.00  0.00      1S   
ATOM    600 NH2  ARG    88      -8.665 -11.261  29.245  1.00  1.00      1S   
ATOM    601 HH21 ARG    88      -9.258 -11.580  29.979  1.00  0.00      1S   
ATOM    602 HH22 ARG    88      -8.911 -11.362  28.282  1.00  0.00      1S   
ATOM    603 C    ARG    88      -1.806 -11.271  30.494  1.00  1.00      1S   
ATOM    604 O    ARG    88      -1.259 -10.490  29.720  1.00  1.00      1S   
ATOM    605 N    ARG    89      -2.094 -12.544  30.151  1.00  1.00      1S   
ATOM    606 HN   ARG    89      -2.576 -13.150  30.781  1.00  0.00      1S   
ATOM    607 CA   ARG    89      -1.719 -13.125  28.888  1.00  1.00      1S   
ATOM    608 HA   ARG    89      -0.832 -12.641  28.509  1.00  0.00      1S   
ATOM    609 CB   ARG    89      -1.461 -14.632  29.037  1.00  1.00      1S   
ATOM    610 HB1  ARG    89      -2.364 -15.113  29.477  1.00  0.00      1S   
ATOM    611 HB2  ARG    89      -0.634 -14.761  29.762  1.00  0.00      1S   
ATOM    612 CG   ARG    89      -1.078 -15.351  27.733  1.00  1.00      1S   
ATOM    613 HG1  ARG    89      -0.193 -14.841  27.290  1.00  0.00      1S   
ATOM    614 HG2  ARG    89      -1.917 -15.280  27.005  1.00  0.00      1S   
ATOM    615 CD   ARG    89      -0.731 -16.825  27.940  1.00  1.00      1S   
ATOM    616 HD1  ARG    89       0.185 -16.914  28.556  1.00  0.00      1S   
ATOM    617 HD2  ARG    89      -0.587 -17.343  26.969  1.00  0.00      1S   
ATOM    618 NE   ARG    89      -1.848 -17.499  28.663  1.00  1.00      1S   
ATOM    619 HE   ARG    89      -2.714 -17.018  28.792  1.00  0.00      1S   
ATOM    620 CZ   ARG    89      -1.694 -18.731  29.219  1.00  1.00      1S   
ATOM    621 NH1  ARG    89      -0.531 -19.418  29.099  1.00  1.00      1S   
ATOM    622 HH11 ARG    89      -0.382 -20.253  29.630  1.00  0.00      1S   
ATOM    623 HH12 ARG    89       0.216 -19.048  28.551  1.00  0.00      1S   
ATOM    624 NH2  ARG    89      -2.728 -19.278  29.899  1.00  1.00      1S   
ATOM    625 HH21 ARG    89      -3.595 -18.793  29.985  1.00  0.00      1S   
ATOM    626 HH22 ARG    89      -2.649 -20.191  30.303  1.00  0.00      1S   
ATOM    627 C    ARG    89      -2.827 -12.956  27.904  1.00  1.00      1S   
ATOM    628 O    ARG    89      -3.865 -13.606  28.045  1.00  1.00      1S   
ATOM    629 N    ALA    90      -2.613 -12.081  26.880  1.00  1.00      1S   
ATOM    630 HN   ALA    90      -1.751 -11.576  26.827  1.00  0.00      1S   
ATOM    631 CA   ALA    90      -3.549 -11.814  25.802  1.00  1.00      1S   
ATOM    632 HA   ALA    90      -3.214 -10.917  25.294  1.00  0.00      1S   
ATOM    633 CB   ALA    90      -3.611 -12.983  24.812  1.00  1.00      1S   
ATOM    634 HB1  ALA    90      -3.970 -13.888  25.349  1.00  0.00      1S   
ATOM    635 HB2  ALA    90      -2.605 -13.186  24.394  1.00  0.00      1S   
ATOM    636 HB3  ALA    90      -4.316 -12.758  23.983  1.00  0.00      1S   
ATOM    637 C    ALA    90      -4.969 -11.567  26.333  1.00  1.00      1S   
ATOM    638 OT1  ALA    90      -5.974 -11.798  25.613  1.00  1.00      1S   
ATOM    639 OT2  ALA    90      -5.043 -11.193  27.527  1.00  0.00      1S   
TER 
ATOM    640 N    PRO   106       1.832 -14.790  21.869  1.00  1.00      2S   
ATOM    641 HN1  PRO   106       1.243 -14.819  21.053  1.00  0.00      2S   
ATOM    642 HN2  PRO   106       2.625 -14.208  21.660  1.00  0.00      2S   
ATOM    643 CD   PRO   106       2.289 -16.190  22.175  1.00  1.00      2S   
ATOM    644 HD1  PRO   106       3.379 -16.292  21.982  1.00  0.00      2S   
ATOM    645 HD2  PRO   106       1.729 -16.915  21.547  1.00  0.00      2S   
ATOM    646 CA   PRO   106       1.057 -14.240  23.026  1.00  1.00      2S   
ATOM    647 HA   PRO   106       0.180 -13.781  22.594  1.00  0.00      2S   
ATOM    648 CB   PRO   106       0.801 -15.436  23.940  1.00  1.00      2S   
ATOM    649 HB1  PRO   106      -0.159 -15.924  23.670  1.00  0.00      2S   
ATOM    650 HB2  PRO   106       0.783 -15.154  25.015  1.00  0.00      2S   
ATOM    651 CG   PRO   106       1.952 -16.395  23.650  1.00  1.00      2S   
ATOM    652 HG1  PRO   106       2.809 -16.078  24.271  1.00  0.00      2S   
ATOM    653 HG2  PRO   106       1.699 -17.447  23.885  1.00  0.00      2S   
ATOM    654 C    PRO   106       1.867 -13.180  23.717  1.00  1.00      2S   
ATOM    655 O    PRO   106       3.096 -13.249  23.741  1.00  1.00      2S   
ATOM    656 N    ARG   107       1.168 -12.180  24.288  1.00  1.00      2S   
ATOM    657 HN   ARG   107       0.170 -12.159  24.260  1.00  0.00      2S   
ATOM    658 CA   ARG   107       1.793 -11.045  24.911  1.00  1.00      2S   
ATOM    659 HA   ARG   107       2.865 -11.173  24.952  1.00  0.00      2S   
ATOM    660 CB   ARG   107       1.457  -9.760  24.149  1.00  1.00      2S   
ATOM    661 HB1  ARG   107       1.724  -8.875  24.751  1.00  0.00      2S   
ATOM    662 HB2  ARG   107       0.362  -9.714  23.959  1.00  0.00      2S   
ATOM    663 CG   ARG   107       2.199  -9.640  22.818  1.00  1.00      2S   
ATOM    664 HG1  ARG   107       2.069 -10.580  22.238  1.00  0.00      2S   
ATOM    665 HG2  ARG   107       3.286  -9.510  23.021  1.00  0.00      2S   
ATOM    666 CD   ARG   107       1.656  -8.461  22.006  1.00  1.00      2S   
ATOM    667 HD1  ARG   107       1.576  -7.555  22.644  1.00  0.00      2S   
ATOM    668 HD2  ARG   107       0.656  -8.700  21.584  1.00  0.00      2S   
ATOM    669 NE   ARG   107       2.607  -8.147  20.900  1.00  1.00      2S   
ATOM    670 HE   ARG   107       3.212  -7.358  21.000  1.00  0.00      2S   
ATOM    671 CZ   ARG   107       2.675  -8.882  19.756  1.00  1.00      2S   
ATOM    672 NH1  ARG   107       3.556  -8.520  18.790  1.00  1.00      2S   
ATOM    673 HH11 ARG   107       4.136  -7.719  18.930  1.00  0.00      2S   
ATOM    674 HH12 ARG   107       3.604  -9.047  17.944  1.00  0.00      2S   
ATOM    675 NH2  ARG   107       1.876  -9.963  19.565  1.00  1.00      2S   
ATOM    676 HH21 ARG   107       1.234 -10.223  20.284  1.00  0.00      2S   
ATOM    677 HH22 ARG   107       1.944 -10.491  18.721  1.00  0.00      2S   
ATOM    678 C    ARG   107       1.293 -10.907  26.316  1.00  1.00      2S   
ATOM    679 O    ARG   107       0.147 -11.230  26.617  1.00  1.00      2S   
ATOM    680 N    TRP   108       2.177 -10.419  27.211  1.00  1.00      2S   
ATOM    681 HN   TRP   108       3.100 -10.160  26.934  1.00  0.00      2S   
ATOM    682 CA   TRP   108       1.907 -10.313  28.622  1.00  1.00      2S   
ATOM    683 HA   TRP   108       0.939 -10.731  28.845  1.00  0.00      2S   
ATOM    684 CB   TRP   108       2.963 -11.058  29.465  1.00  1.00      2S   
ATOM    685 HB1  TRP   108       2.791 -10.873  30.545  1.00  0.00      2S   
ATOM    686 HB2  TRP   108       3.972 -10.672  29.197  1.00  0.00      2S   
ATOM    687 CG   TRP   108       2.954 -12.554  29.211  1.00  1.00      2S   
ATOM    688 CD1  TRP   108       3.513 -13.224  28.158  1.00  1.00      2S   
ATOM    689 HD1  TRP   108       4.053 -12.758  27.348  1.00  0.00      2S   
ATOM    690 NE1  TRP   108       3.275 -14.571  28.264  1.00  1.00      2S   
ATOM    691 HE1  TRP   108       3.568 -15.256  27.636  1.00  0.00      2S   
ATOM    692 CE2  TRP   108       2.552 -14.800  29.409  1.00  1.00      2S   
ATOM    693 CD2  TRP   108       2.316 -13.555  30.031  1.00  1.00      2S   
ATOM    694 CE3  TRP   108       1.588 -13.474  31.217  1.00  1.00      2S   
ATOM    695 HE3  TRP   108       1.378 -12.540  31.707  1.00  0.00      2S   
ATOM    696 CZ3  TRP   108       1.106 -14.669  31.777  1.00  1.00      2S   
ATOM    697 HZ3  TRP   108       0.531 -14.636  32.691  1.00  0.00      2S   
ATOM    698 CZ2  TRP   108       2.080 -15.979  29.966  1.00  1.00      2S   
ATOM    699 HZ2  TRP   108       2.242 -16.933  29.489  1.00  0.00      2S   
ATOM    700 CH2  TRP   108       1.346 -15.904  31.157  1.00  1.00      2S   
ATOM    701 HH2  TRP   108       0.947 -16.810  31.588  1.00  0.00      2S   
ATOM    702 C    TRP   108       1.892  -8.859  28.995  1.00  1.00      2S   
ATOM    703 O    TRP   108       2.924  -8.191  28.985  1.00  1.00      2S   
ATOM    704 N    TYR   109       0.694  -8.336  29.328  1.00  1.00      2S   
ATOM    705 HN   TYR   109      -0.132  -8.899  29.321  1.00  0.00      2S   
ATOM    706 CA   TYR   109       0.489  -6.947  29.649  1.00  1.00      2S   
ATOM    707 HA   TYR   109       1.310  -6.361  29.264  1.00  0.00      2S   
ATOM    708 CB   TYR   109      -0.850  -6.401  29.096  1.00  1.00      2S   
ATOM    709 HB1  TYR   109      -1.069  -5.413  29.550  1.00  0.00      2S   
ATOM    710 HB2  TYR   109      -1.677  -7.098  29.344  1.00  0.00      2S   
ATOM    711 CG   TYR   109      -0.829  -6.232  27.598  1.00  1.00      2S   
ATOM    712 CD1  TYR   109      -0.811  -7.337  26.732  1.00  1.00      2S   
ATOM    713 HD1  TYR   109      -0.791  -8.337  27.136  1.00  0.00      2S   
ATOM    714 CE1  TYR   109      -0.829  -7.156  25.344  1.00  1.00      2S   
ATOM    715 HE1  TYR   109      -0.812  -8.014  24.694  1.00  0.00      2S   
ATOM    716 CZ   TYR   109      -0.865  -5.865  24.804  1.00  1.00      2S   
ATOM    717 OH   TYR   109      -0.924  -5.662  23.413  1.00  1.00      2S   
ATOM    718 HH   TYR   109      -1.422  -6.392  23.041  1.00  0.00      2S   
ATOM    719 CD2  TYR   109      -0.880  -4.950  27.030  1.00  1.00      2S   
ATOM    720 HD2  TYR   109      -0.926  -4.095  27.661  1.00  0.00      2S   
ATOM    721 CE2  TYR   109      -0.885  -4.759  25.648  1.00  1.00      2S   
ATOM    722 HE2  TYR   109      -0.925  -3.762  25.235  1.00  0.00      2S   
ATOM    723 C    TYR   109       0.447  -6.808  31.148  1.00  1.00      2S   
ATOM    724 O    TYR   109      -0.297  -7.512  31.819  1.00  1.00      2S   
ATOM    725 N    PHE   110       1.243  -5.878  31.713  1.00  1.00      2S   
ATOM    726 HN   PHE   110       1.833  -5.301  31.146  1.00  0.00      2S   
ATOM    727 CA   PHE   110       1.312  -5.635  33.131  1.00  1.00      2S   
ATOM    728 HA   PHE   110       1.169  -6.577  33.635  1.00  0.00      2S   
ATOM    729 CB   PHE   110       2.687  -5.046  33.534  1.00  1.00      2S   
ATOM    730 HB1  PHE   110       2.895  -4.117  32.964  1.00  0.00      2S   
ATOM    731 HB2  PHE   110       3.478  -5.775  33.292  1.00  0.00      2S   
ATOM    732 CG   PHE   110       2.800  -4.749  35.002  1.00  1.00      2S   
ATOM    733 CD1  PHE   110       3.123  -5.755  35.923  1.00  1.00      2S   
ATOM    734 HD1  PHE   110       3.304  -6.760  35.580  1.00  0.00      2S   
ATOM    735 CE1  PHE   110       3.199  -5.457  37.286  1.00  1.00      2S   
ATOM    736 HE1  PHE   110       3.438  -6.226  37.991  1.00  0.00      2S   
ATOM    737 CZ   PHE   110       2.946  -4.162  37.745  1.00  1.00      2S   
ATOM    738 HZ   PHE   110       3.010  -3.941  38.800  1.00  0.00      2S   
ATOM    739 CD2  PHE   110       2.536  -3.452  35.469  1.00  1.00      2S   
ATOM    740 HD2  PHE   110       2.255  -2.682  34.767  1.00  0.00      2S   
ATOM    741 CE2  PHE   110       2.607  -3.159  36.833  1.00  1.00      2S   
ATOM    742 HE2  PHE   110       2.401  -2.159  37.177  1.00  0.00      2S   
ATOM    743 C    PHE   110       0.222  -4.686  33.554  1.00  1.00      2S   
ATOM    744 O    PHE   110      -0.036  -3.670  32.925  1.00  1.00      2S   
ATOM    745 N    TYR   111      -0.428  -4.985  34.684  1.00  1.00      2S   
ATOM    746 HN   TYR   111      -0.223  -5.826  35.187  1.00  0.00      2S   
ATOM    747 CA   TYR   111      -1.429  -4.129  35.249  1.00  1.00      2S   
ATOM    748 HA   TYR   111      -1.355  -3.131  34.843  1.00  0.00      2S   
ATOM    749 CB   TYR   111      -2.848  -4.697  35.061  1.00  1.00      2S   
ATOM    750 HB1  TYR   111      -3.605  -4.039  35.537  1.00  0.00      2S   
ATOM    751 HB2  TYR   111      -2.897  -5.706  35.512  1.00  0.00      2S   
ATOM    752 CG   TYR   111      -3.196  -4.842  33.608  1.00  1.00      2S   
ATOM    753 CD1  TYR   111      -3.020  -6.065  32.930  1.00  1.00      2S   
ATOM    754 HD1  TYR   111      -2.604  -6.915  33.448  1.00  0.00      2S   
ATOM    755 CE1  TYR   111      -3.367  -6.187  31.579  1.00  1.00      2S   
ATOM    756 HE1  TYR   111      -3.218  -7.112  31.055  1.00  0.00      2S   
ATOM    757 CZ   TYR   111      -3.910  -5.102  30.895  1.00  1.00      2S   
ATOM    758 OH   TYR   111      -4.270  -5.209  29.535  1.00  1.00      2S   
ATOM    759 HH   TYR   111      -4.063  -6.103  29.255  1.00  0.00      2S   
ATOM    760 CD2  TYR   111      -3.734  -3.754  32.910  1.00  1.00      2S   
ATOM    761 HD2  TYR   111      -3.890  -2.807  33.408  1.00  0.00      2S   
ATOM    762 CE2  TYR   111      -4.104  -3.904  31.574  1.00  1.00      2S   
ATOM    763 HE2  TYR   111      -4.564  -3.102  31.056  1.00  0.00      2S   
ATOM    764 C    TYR   111      -1.137  -4.055  36.714  1.00  1.00      2S   
ATOM    765 O    TYR   111      -0.902  -5.069  37.363  1.00  1.00      2S   
ATOM    766 N    TYR   112      -1.158  -2.831  37.287  1.00  1.00      2S   
ATOM    767 HN   TYR   112      -1.327  -2.009  36.749  1.00  0.00      2S   
ATOM    768 CA   TYR   112      -0.955  -2.619  38.702  1.00  1.00      2S   
ATOM    769 HA   TYR   112      -0.041  -3.117  38.997  1.00  0.00      2S   
ATOM    770 CB   TYR   112      -0.892  -1.113  39.058  1.00  1.00      2S   
ATOM    771 HB1  TYR   112      -1.070  -0.952  40.141  1.00  0.00      2S   
ATOM    772 HB2  TYR   112      -1.661  -0.558  38.478  1.00  0.00      2S   
ATOM    773 CG   TYR   112       0.460  -0.534  38.743  1.00  1.00      2S   
ATOM    774 CD1  TYR   112       1.539  -0.755  39.614  1.00  1.00      2S   
ATOM    775 HD1  TYR   112       1.395  -1.360  40.494  1.00  0.00      2S   
ATOM    776 CE1  TYR   112       2.796  -0.193  39.358  1.00  1.00      2S   
ATOM    777 HE1  TYR   112       3.616  -0.372  40.039  1.00  0.00      2S   
ATOM    778 CZ   TYR   112       2.982   0.600  38.221  1.00  1.00      2S   
ATOM    779 OH   TYR   112       4.254   1.136  37.951  1.00  1.00      2S   
ATOM    780 HH   TYR   112       4.886   0.661  38.495  1.00  0.00      2S   
ATOM    781 CD2  TYR   112       0.663   0.266  37.606  1.00  1.00      2S   
ATOM    782 HD2  TYR   112      -0.158   0.458  36.933  1.00  0.00      2S   
ATOM    783 CE2  TYR   112       1.915   0.836  37.346  1.00  1.00      2S   
ATOM    784 HE2  TYR   112       2.057   1.448  36.467  1.00  0.00      2S   
ATOM    785 C    TYR   112      -2.083  -3.255  39.472  1.00  1.00      2S   
ATOM    786 O    TYR   112      -3.194  -3.402  38.969  1.00  1.00      2S   
ATOM    787 N    LEU   113      -1.806  -3.694  40.716  1.00  1.00      2S   
ATOM    788 HN   LEU   113      -0.894  -3.582  41.111  1.00  0.00      2S   
ATOM    789 CA   LEU   113      -2.734  -4.453  41.517  1.00  1.00      2S   
ATOM    790 HA   LEU   113      -2.972  -5.364  40.984  1.00  0.00      2S   
ATOM    791 CB   LEU   113      -2.103  -4.803  42.880  1.00  1.00      2S   
ATOM    792 HB1  LEU   113      -1.665  -3.878  43.316  1.00  0.00      2S   
ATOM    793 HB2  LEU   113      -1.267  -5.517  42.706  1.00  0.00      2S   
ATOM    794 CG   LEU   113      -3.058  -5.425  43.916  1.00  1.00      2S   
ATOM    795 HG   LEU   113      -3.887  -4.707  44.117  1.00  0.00      2S   
ATOM    796 CD1  LEU   113      -3.668  -6.742  43.414  1.00  1.00      2S   
ATOM    797 HD11 LEU   113      -2.856  -7.473  43.222  1.00  0.00      2S   
ATOM    798 HD12 LEU   113      -4.238  -6.584  42.476  1.00  0.00      2S   
ATOM    799 HD13 LEU   113      -4.354  -7.166  44.175  1.00  0.00      2S   
ATOM    800 CD2  LEU   113      -2.324  -5.632  45.243  1.00  1.00      2S   
ATOM    801 HD21 LEU   113      -1.941  -4.664  45.628  1.00  0.00      2S   
ATOM    802 HD22 LEU   113      -1.473  -6.329  45.099  1.00  0.00      2S   
ATOM    803 HD23 LEU   113      -3.023  -6.063  45.986  1.00  0.00      2S   
ATOM    804 C    LEU   113      -4.001  -3.672  41.730  1.00  1.00      2S   
ATOM    805 O    LEU   113      -3.965  -2.555  42.231  1.00  1.00      2S   
ATOM    806 N    GLY   114      -5.146  -4.241  41.294  1.00  1.00      2S   
ATOM    807 HN   GLY   114      -5.149  -5.151  40.884  1.00  0.00      2S   
ATOM    808 CA   GLY   114      -6.430  -3.602  41.448  1.00  1.00      2S   
ATOM    809 HA1  GLY   114      -6.386  -2.901  42.268  1.00  0.00      2S   
ATOM    810 HA2  GLY   114      -7.138  -4.390  41.630  1.00  0.00      2S   
ATOM    811 C    GLY   114      -6.886  -2.851  40.230  1.00  1.00      2S   
ATOM    812 O    GLY   114      -7.956  -2.251  40.263  1.00  1.00      2S   
ATOM    813 N    THR   115      -6.105  -2.843  39.125  1.00  1.00      2S   
ATOM    814 HN   THR   115      -5.214  -3.296  39.114  1.00  0.00      2S   
ATOM    815 CA   THR   115      -6.484  -2.148  37.905  1.00  1.00      2S   
ATOM    816 HA   THR   115      -7.499  -1.785  37.987  1.00  0.00      2S   
ATOM    817 CB   THR   115      -5.560  -0.989  37.562  1.00  1.00      2S   
ATOM    818 HB   THR   115      -5.858  -0.523  36.598  1.00  0.00      2S   
ATOM    819 OG1  THR   115      -4.203  -1.394  37.440  1.00  1.00      2S   
ATOM    820 HG1  THR   115      -4.028  -1.939  38.218  1.00  0.00      2S   
ATOM    821 CG2  THR   115      -5.660   0.078  38.661  1.00  1.00      2S   
ATOM    822 HG21 THR   115      -5.359  -0.334  39.647  1.00  0.00      2S   
ATOM    823 HG22 THR   115      -6.702   0.453  38.736  1.00  0.00      2S   
ATOM    824 HG23 THR   115      -4.989   0.928  38.421  1.00  0.00      2S   
ATOM    825 C    THR   115      -6.479  -3.131  36.779  1.00  1.00      2S   
ATOM    826 O    THR   115      -5.972  -4.230  36.945  1.00  1.00      2S   
ATOM    827 N    GLY   116      -7.038  -2.745  35.607  1.00  1.00      2S   
ATOM    828 HN   GLY   116      -7.460  -1.847  35.514  1.00  0.00      2S   
ATOM    829 CA   GLY   116      -7.008  -3.553  34.406  1.00  1.00      2S   
ATOM    830 HA1  GLY   116      -6.078  -4.099  34.385  1.00  0.00      2S   
ATOM    831 HA2  GLY   116      -7.125  -2.878  33.570  1.00  0.00      2S   
ATOM    832 C    GLY   116      -8.148  -4.529  34.373  1.00  1.00      2S   
ATOM    833 O    GLY   116      -9.099  -4.389  35.142  1.00  1.00      2S   
ATOM    834 N    PRO   117      -8.102  -5.543  33.505  1.00  1.00      2S   
ATOM    835 CD   PRO   117      -7.123  -5.658  32.418  1.00  1.00      2S   
ATOM    836 HD1  PRO   117      -6.253  -6.246  32.784  1.00  0.00      2S   
ATOM    837 HD2  PRO   117      -6.782  -4.673  32.031  1.00  0.00      2S   
ATOM    838 CA   PRO   117      -9.201  -6.486  33.351  1.00  1.00      2S   
ATOM    839 HA   PRO   117     -10.120  -5.929  33.240  1.00  0.00      2S   
ATOM    840 CB   PRO   117      -8.839  -7.305  32.099  1.00  1.00      2S   
ATOM    841 HB1  PRO   117      -9.737  -7.535  31.491  1.00  0.00      2S   
ATOM    842 HB2  PRO   117      -8.326  -8.253  32.372  1.00  0.00      2S   
ATOM    843 CG   PRO   117      -7.856  -6.424  31.319  1.00  1.00      2S   
ATOM    844 HG1  PRO   117      -7.170  -7.021  30.688  1.00  0.00      2S   
ATOM    845 HG2  PRO   117      -8.421  -5.709  30.683  1.00  0.00      2S   
ATOM    846 C    PRO   117      -9.363  -7.388  34.550  1.00  1.00      2S   
ATOM    847 O    PRO   117     -10.455  -7.918  34.737  1.00  1.00      2S   
ATOM    848 N    GLU   118      -8.307  -7.579  35.365  1.00  1.00      2S   
ATOM    849 HN   GLU   118      -7.411  -7.181  35.166  1.00  0.00      2S   
ATOM    850 CA   GLU   118      -8.374  -8.413  36.540  1.00  1.00      2S   
ATOM    851 HA   GLU   118      -9.346  -8.877  36.609  1.00  0.00      2S   
ATOM    852 CB   GLU   118      -7.307  -9.519  36.519  1.00  1.00      2S   
ATOM    853 HB1  GLU   118      -7.473 -10.190  37.382  1.00  0.00      2S   
ATOM    854 HB2  GLU   118      -6.299  -9.084  36.654  1.00  0.00      2S   
ATOM    855 CG   GLU   118      -7.276 -10.319  35.206  1.00  1.00      2S   
ATOM    856 HG1  GLU   118      -6.388 -10.972  35.223  1.00  0.00      2S   
ATOM    857 HG2  GLU   118      -7.180  -9.635  34.337  1.00  0.00      2S   
ATOM    858 CD   GLU   118      -8.513 -11.194  35.021  1.00  1.00      2S   
ATOM    859 OE1  GLU   118      -9.173 -11.541  36.035  1.00  1.00      2S   
ATOM    860 OE2  GLU   118      -8.800 -11.545  33.845  1.00  1.00      2S   
ATOM    861 C    GLU   118      -8.175  -7.567  37.766  1.00  1.00      2S   
ATOM    862 O    GLU   118      -7.245  -7.770  38.547  1.00  1.00      2S   
ATOM    863 N    ALA   119      -9.072  -6.585  37.977  1.00  1.00      2S   
ATOM    864 HN   ALA   119      -9.826  -6.426  37.343  1.00  0.00      2S   
ATOM    865 CA   ALA   119      -8.967  -5.661  39.077  1.00  1.00      2S   
ATOM    866 HA   ALA   119      -7.936  -5.344  39.156  1.00  0.00      2S   
ATOM    867 CB   ALA   119      -9.858  -4.431  38.842  1.00  1.00      2S   
ATOM    868 HB1  ALA   119     -10.920  -4.726  38.716  1.00  0.00      2S   
ATOM    869 HB2  ALA   119      -9.526  -3.904  37.921  1.00  0.00      2S   
ATOM    870 HB3  ALA   119      -9.788  -3.724  39.694  1.00  0.00      2S   
ATOM    871 C    ALA   119      -9.347  -6.312  40.382  1.00  1.00      2S   
ATOM    872 O    ALA   119      -8.617  -6.217  41.365  1.00  1.00      2S   
ATOM    873 N    GLY   120     -10.496  -7.024  40.417  1.00  1.00      2S   
ATOM    874 HN   GLY   120     -11.068  -7.117  39.606  1.00  0.00      2S   
ATOM    875 CA   GLY   120     -11.012  -7.617  41.634  1.00  1.00      2S   
ATOM    876 HA1  GLY   120     -12.010  -7.964  41.416  1.00  0.00      2S   
ATOM    877 HA2  GLY   120     -10.992  -6.861  42.407  1.00  0.00      2S   
ATOM    878 C    GLY   120     -10.228  -8.799  42.132  1.00  1.00      2S   
ATOM    879 O    GLY   120     -10.481  -9.280  43.234  1.00  1.00      2S   
ATOM    880 N    LEU   121      -9.245  -9.298  41.348  1.00  1.00      2S   
ATOM    881 HN   LEU   121      -9.034  -8.901  40.457  1.00  0.00      2S   
ATOM    882 CA   LEU   121      -8.437 -10.426  41.738  1.00  1.00      2S   
ATOM    883 HA   LEU   121      -9.108 -11.201  42.067  1.00  0.00      2S   
ATOM    884 CB   LEU   121      -7.600 -10.964  40.557  1.00  1.00      2S   
ATOM    885 HB1  LEU   121      -6.601 -11.301  40.908  1.00  0.00      2S   
ATOM    886 HB2  LEU   121      -7.442 -10.138  39.830  1.00  0.00      2S   
ATOM    887 CG   LEU   121      -8.237 -12.156  39.815  1.00  1.00      2S   
ATOM    888 HG   LEU   121      -8.335 -12.998  40.541  1.00  0.00      2S   
ATOM    889 CD1  LEU   121      -9.635 -11.819  39.270  1.00  1.00      2S   
ATOM    890 HD11 LEU   121      -9.564 -10.956  38.572  1.00  0.00      2S   
ATOM    891 HD12 LEU   121     -10.325 -11.545  40.095  1.00  0.00      2S   
ATOM    892 HD13 LEU   121     -10.061 -12.685  38.724  1.00  0.00      2S   
ATOM    893 CD2  LEU   121      -7.299 -12.632  38.695  1.00  1.00      2S   
ATOM    894 HD21 LEU   121      -6.240 -12.427  38.953  1.00  0.00      2S   
ATOM    895 HD22 LEU   121      -7.535 -12.103  37.754  1.00  0.00      2S   
ATOM    896 HD23 LEU   121      -7.422 -13.716  38.514  1.00  0.00      2S   
ATOM    897 C    LEU   121      -7.489 -10.027  42.849  1.00  1.00      2S   
ATOM    898 O    LEU   121      -6.736  -9.068  42.674  1.00  1.00      2S   
ATOM    899 N    PRO   122      -7.471 -10.701  44.000  1.00  1.00      2S   
ATOM    900 CD   PRO   122      -8.381 -11.791  44.375  1.00  1.00      2S   
ATOM    901 HD1  PRO   122      -8.405 -12.580  43.591  1.00  0.00      2S   
ATOM    902 HD2  PRO   122      -9.402 -11.380  44.531  1.00  0.00      2S   
ATOM    903 CA   PRO   122      -6.528 -10.388  45.054  1.00  1.00      2S   
ATOM    904 HA   PRO   122      -6.477  -9.320  45.206  1.00  0.00      2S   
ATOM    905 CB   PRO   122      -7.055 -11.159  46.273  1.00  1.00      2S   
ATOM    906 HB1  PRO   122      -7.766 -10.511  46.833  1.00  0.00      2S   
ATOM    907 HB2  PRO   122      -6.253 -11.494  46.962  1.00  0.00      2S   
ATOM    908 CG   PRO   122      -7.822 -12.346  45.684  1.00  1.00      2S   
ATOM    909 HG1  PRO   122      -7.107 -13.167  45.465  1.00  0.00      2S   
ATOM    910 HG2  PRO   122      -8.617 -12.711  46.364  1.00  0.00      2S   
ATOM    911 C    PRO   122      -5.162 -10.882  44.675  1.00  1.00      2S   
ATOM    912 O    PRO   122      -5.035 -11.759  43.821  1.00  1.00      2S   
ATOM    913 N    TYR   123      -4.118 -10.326  45.319  1.00  1.00      2S   
ATOM    914 HN   TYR   123      -4.255  -9.600  45.989  1.00  0.00      2S   
ATOM    915 CA   TYR   123      -2.755 -10.710  45.068  1.00  1.00      2S   
ATOM    916 HA   TYR   123      -2.583 -10.639  44.003  1.00  0.00      2S   
ATOM    917 CB   TYR   123      -1.782  -9.777  45.821  1.00  1.00      2S   
ATOM    918 HB1  TYR   123      -1.949  -9.879  46.911  1.00  0.00      2S   
ATOM    919 HB2  TYR   123      -1.976  -8.723  45.528  1.00  0.00      2S   
ATOM    920 CG   TYR   123      -0.340 -10.082  45.537  1.00  1.00      2S   
ATOM    921 CD1  TYR   123       0.304  -9.500  44.438  1.00  1.00      2S   
ATOM    922 HD1  TYR   123      -0.238  -8.820  43.796  1.00  0.00      2S   
ATOM    923 CE1  TYR   123       1.650  -9.776  44.183  1.00  1.00      2S   
ATOM    924 HE1  TYR   123       2.129  -9.327  43.327  1.00  0.00      2S   
ATOM    925 CZ   TYR   123       2.354 -10.660  45.008  1.00  1.00      2S   
ATOM    926 OH   TYR   123       3.703 -10.955  44.729  1.00  1.00      2S   
ATOM    927 HH   TYR   123       3.950 -10.453  43.950  1.00  0.00      2S   
ATOM    928 CD2  TYR   123       0.376 -10.962  46.368  1.00  1.00      2S   
ATOM    929 HD2  TYR   123      -0.116 -11.425  47.211  1.00  0.00      2S   
ATOM    930 CE2  TYR   123       1.717 -11.255  46.103  1.00  1.00      2S   
ATOM    931 HE2  TYR   123       2.257 -11.937  46.743  1.00  0.00      2S   
ATOM    932 C    TYR   123      -2.551 -12.140  45.508  1.00  1.00      2S   
ATOM    933 O    TYR   123      -2.933 -12.528  46.611  1.00  1.00      2S   
ATOM    934 N    GLY   124      -1.953 -12.953  44.614  1.00  1.00      2S   
ATOM    935 HN   GLY   124      -1.628 -12.613  43.734  1.00  0.00      2S   
ATOM    936 CA   GLY   124      -1.704 -14.341  44.895  1.00  1.00      2S   
ATOM    937 HA1  GLY   124      -1.617 -14.486  45.963  1.00  0.00      2S   
ATOM    938 HA2  GLY   124      -0.800 -14.604  44.366  1.00  0.00      2S   
ATOM    939 C    GLY   124      -2.788 -15.239  44.386  1.00  1.00      2S   
ATOM    940 O    GLY   124      -2.647 -16.450  44.512  1.00  1.00      2S   
ATOM    941 N    ALA   125      -3.876 -14.689  43.786  1.00  1.00      2S   
ATOM    942 HN   ALA   125      -4.006 -13.700  43.766  1.00  0.00      2S   
ATOM    943 CA   ALA   125      -4.934 -15.455  43.163  1.00  1.00      2S   
ATOM    944 HA   ALA   125      -5.324 -16.116  43.927  1.00  0.00      2S   
ATOM    945 CB   ALA   125      -6.101 -14.581  42.714  1.00  1.00      2S   
ATOM    946 HB1  ALA   125      -5.741 -13.866  41.946  1.00  0.00      2S   
ATOM    947 HB2  ALA   125      -6.502 -14.004  43.572  1.00  0.00      2S   
ATOM    948 HB3  ALA   125      -6.921 -15.201  42.291  1.00  0.00      2S   
ATOM    949 C    ALA   125      -4.451 -16.221  41.920  1.00  1.00      2S   
ATOM    950 O    ALA   125      -3.662 -15.751  41.118  1.00  1.00      2S   
ATOM    951 N    ASN   126      -4.904 -17.473  41.775  1.00  1.00      2S   
ATOM    952 HN   ASN   126      -5.495 -17.818  42.491  1.00  0.00      2S   
ATOM    953 CA   ASN   126      -4.208 -18.583  41.185  1.00  1.00      2S   
ATOM    954 HA   ASN   126      -3.282 -18.247  40.732  1.00  0.00      2S   
ATOM    955 CB   ASN   126      -3.933 -19.816  42.161  1.00  1.00      2S   
ATOM    956 HB1  ASN   126      -2.865 -20.096  42.041  1.00  0.00      2S   
ATOM    957 HB2  ASN   126      -4.455 -20.722  41.782  1.00  0.00      2S   
ATOM    958 CG   ASN   126      -4.304 -19.616  43.678  1.00  0.00      2S   
ATOM    959 OD1  ASN   126      -4.468 -20.485  44.521  1.00  0.00      2S   
ATOM    960 ND2  ASN   126      -4.584 -18.400  44.162  1.00  0.00      2S   
ATOM    961 HD21 ASN   126      -4.051 -17.619  43.812  1.00  0.00      2S   
ATOM    962 HD22 ASN   126      -5.568 -18.276  44.290  1.00  0.00      2S   
ATOM    963 C    ASN   126      -5.188 -18.912  40.118  1.00  1.00      2S   
ATOM    964 O    ASN   126      -5.941 -19.884  40.173  1.00  1.00      2S   
ATOM    965 N    LYS   127      -5.227 -18.007  39.132  1.00  1.00      2S   
ATOM    966 HN   LYS   127      -4.687 -17.170  39.198  1.00  0.00      2S   
ATOM    967 CA   LYS   127      -6.011 -18.177  37.953  1.00  1.00      2S   
ATOM    968 HA   LYS   127      -6.593 -19.086  38.018  1.00  0.00      2S   
ATOM    969 CB   LYS   127      -6.948 -16.978  37.725  1.00  1.00      2S   
ATOM    970 HB1  LYS   127      -6.332 -16.056  37.624  1.00  0.00      2S   
ATOM    971 HB2  LYS   127      -7.585 -16.848  38.629  1.00  0.00      2S   
ATOM    972 CG   LYS   127      -7.871 -17.129  36.508  1.00  1.00      2S   
ATOM    973 HG1  LYS   127      -8.884 -17.431  36.843  1.00  0.00      2S   
ATOM    974 HG2  LYS   127      -7.511 -17.938  35.845  1.00  0.00      2S   
ATOM    975 CD   LYS   127      -7.928 -15.853  35.669  1.00  1.00      2S   
ATOM    976 HD1  LYS   127      -8.190 -16.110  34.619  1.00  0.00      2S   
ATOM    977 HD2  LYS   127      -6.913 -15.394  35.647  1.00  0.00      2S   
ATOM    978 CE   LYS   127      -8.929 -14.843  36.222  1.00  1.00      2S   
ATOM    979 HE1  LYS   127      -8.824 -13.886  35.679  1.00  0.00      2S   
ATOM    980 HE2  LYS   127      -8.762 -14.684  37.307  1.00  0.00      2S   
ATOM    981 NZ   LYS   127     -10.322 -15.314  36.051  1.00  1.00      2S   
ATOM    982 HZ1  LYS   127     -10.496 -16.123  36.681  1.00  0.00      2S   
ATOM    983 HZ2  LYS   127     -10.468 -15.605  35.064  1.00  0.00      2S   
ATOM    984 HZ3  LYS   127     -10.975 -14.540  36.287  1.00  0.00      2S   
ATOM    985 C    LYS   127      -5.026 -18.308  36.829  1.00  1.00      2S   
ATOM    986 O    LYS   127      -3.942 -17.727  36.856  1.00  1.00      2S   
ATOM    987 N    ASP   128      -5.393 -19.098  35.798  1.00  1.00      2S   
ATOM    988 HN   ASP   128      -6.277 -19.559  35.795  1.00  0.00      2S   
ATOM    989 CA   ASP   128      -4.583 -19.312  34.631  1.00  1.00      2S   
ATOM    990 HA   ASP   128      -3.603 -19.607  34.981  1.00  0.00      2S   
ATOM    991 CB   ASP   128      -5.198 -20.423  33.749  1.00  1.00      2S   
ATOM    992 HB1  ASP   128      -6.087 -20.032  33.207  1.00  0.00      2S   
ATOM    993 HB2  ASP   128      -5.528 -21.264  34.395  1.00  0.00      2S   
ATOM    994 CG   ASP   128      -4.187 -20.971  32.749  1.00  1.00      2S   
ATOM    995 OD1  ASP   128      -3.208 -21.631  33.184  1.00  1.00      2S   
ATOM    996 OD2  ASP   128      -4.391 -20.732  31.532  1.00  1.00      2S   
ATOM    997 C    ASP   128      -4.463 -18.030  33.834  1.00  1.00      2S   
ATOM    998 O    ASP   128      -5.417 -17.262  33.706  1.00  1.00      2S   
ATOM    999 N    GLY   129      -3.247 -17.767  33.308  1.00  1.00      2S   
ATOM   1000 HN   GLY   129      -2.496 -18.415  33.411  1.00  0.00      2S   
ATOM   1001 CA   GLY   129      -2.978 -16.591  32.514  1.00  1.00      2S   
ATOM   1002 HA1  GLY   129      -3.856 -16.369  31.923  1.00  0.00      2S   
ATOM   1003 HA2  GLY   129      -2.113 -16.812  31.908  1.00  0.00      2S   
ATOM   1004 C    GLY   129      -2.657 -15.380  33.344  1.00  1.00      2S   
ATOM   1005 O    GLY   129      -2.577 -14.282  32.796  1.00  1.00      2S   
ATOM   1006 N    ILE   130      -2.478 -15.543  34.678  1.00  1.00      2S   
ATOM   1007 HN   ILE   130      -2.555 -16.441  35.107  1.00  0.00      2S   
ATOM   1008 CA   ILE   130      -2.200 -14.453  35.585  1.00  1.00      2S   
ATOM   1009 HA   ILE   130      -1.878 -13.595  35.022  1.00  0.00      2S   
ATOM   1010 CB   ILE   130      -3.403 -14.087  36.463  1.00  1.00      2S   
ATOM   1011 HB   ILE   130      -3.785 -15.009  36.958  1.00  0.00      2S   
ATOM   1012 CG2  ILE   130      -3.011 -13.075  37.561  1.00  1.00      2S   
ATOM   1013 HG21 ILE   130      -2.473 -12.213  37.117  1.00  0.00      2S   
ATOM   1014 HG22 ILE   130      -2.360 -13.551  38.322  1.00  0.00      2S   
ATOM   1015 HG23 ILE   130      -3.923 -12.698  38.071  1.00  0.00      2S   
ATOM   1016 CG1  ILE   130      -4.550 -13.514  35.601  1.00  1.00      2S   
ATOM   1017 HG11 ILE   130      -5.431 -13.326  36.255  1.00  0.00      2S   
ATOM   1018 HG12 ILE   130      -4.851 -14.268  34.842  1.00  0.00      2S   
ATOM   1019 CD   ILE   130      -4.176 -12.209  34.895  1.00  1.00      2S   
ATOM   1020 HD1  ILE   130      -3.221 -12.298  34.346  1.00  0.00      2S   
ATOM   1021 HD2  ILE   130      -4.078 -11.385  35.632  1.00  0.00      2S   
ATOM   1022 HD3  ILE   130      -4.954 -11.940  34.153  1.00  0.00      2S   
ATOM   1023 C    ILE   130      -1.034 -14.861  36.433  1.00  1.00      2S   
ATOM   1024 O    ILE   130      -1.062 -15.905  37.081  1.00  1.00      2S   
ATOM   1025 N    ILE   131       0.029 -14.021  36.446  1.00  1.00      2S   
ATOM   1026 HN   ILE   131       0.069 -13.221  35.849  1.00  0.00      2S   
ATOM   1027 CA   ILE   131       1.142 -14.181  37.353  1.00  1.00      2S   
ATOM   1028 HA   ILE   131       0.934 -14.979  38.050  1.00  0.00      2S   
ATOM   1029 CB   ILE   131       2.459 -14.460  36.649  1.00  1.00      2S   
ATOM   1030 HB   ILE   131       3.263 -14.570  37.414  1.00  0.00      2S   
ATOM   1031 CG2  ILE   131       2.339 -15.792  35.883  1.00  1.00      2S   
ATOM   1032 HG21 ILE   131       1.806 -15.636  34.920  1.00  0.00      2S   
ATOM   1033 HG22 ILE   131       1.788 -16.548  36.478  1.00  0.00      2S   
ATOM   1034 HG23 ILE   131       3.348 -16.192  35.663  1.00  0.00      2S   
ATOM   1035 CG1  ILE   131       2.834 -13.311  35.695  1.00  1.00      2S   
ATOM   1036 HG11 ILE   131       2.587 -12.331  36.151  1.00  0.00      2S   
ATOM   1037 HG12 ILE   131       2.235 -13.404  34.761  1.00  0.00      2S   
ATOM   1038 CD   ILE   131       4.314 -13.262  35.352  1.00  1.00      2S   
ATOM   1039 HD1  ILE   131       4.533 -13.994  34.555  1.00  0.00      2S   
ATOM   1040 HD2  ILE   131       4.930 -13.492  36.247  1.00  0.00      2S   
ATOM   1041 HD3  ILE   131       4.585 -12.253  34.977  1.00  0.00      2S   
ATOM   1042 C    ILE   131       1.260 -12.915  38.160  1.00  1.00      2S   
ATOM   1043 O    ILE   131       0.781 -11.862  37.747  1.00  1.00      2S   
ATOM   1044 N    TRP   132       1.909 -12.996  39.341  1.00  1.00      2S   
ATOM   1045 HN   TRP   132       2.320 -13.850  39.650  1.00  0.00      2S   
ATOM   1046 CA   TRP   132       1.973 -11.894  40.271  1.00  1.00      2S   
ATOM   1047 HA   TRP   132       1.494 -11.018  39.854  1.00  0.00      2S   
ATOM   1048 CB   TRP   132       1.285 -12.240  41.605  1.00  1.00      2S   
ATOM   1049 HB1  TRP   132       1.405 -11.407  42.319  1.00  0.00      2S   
ATOM   1050 HB2  TRP   132       1.753 -13.151  42.039  1.00  0.00      2S   
ATOM   1051 CG   TRP   132      -0.190 -12.500  41.435  1.00  1.00      2S   
ATOM   1052 CD1  TRP   132      -0.795 -13.708  41.267  1.00  1.00      2S   
ATOM   1053 HD1  TRP   132      -0.286 -14.661  41.266  1.00  0.00      2S   
ATOM   1054 NE1  TRP   132      -2.139 -13.536  41.092  1.00  1.00      2S   
ATOM   1055 HE1  TRP   132      -2.790 -14.260  40.974  1.00  0.00      2S   
ATOM   1056 CE2  TRP   132      -2.439 -12.206  41.144  1.00  1.00      2S   
ATOM   1057 CD2  TRP   132      -1.235 -11.509  41.358  1.00  1.00      2S   
ATOM   1058 CE3  TRP   132      -1.223 -10.123  41.452  1.00  1.00      2S   
ATOM   1059 HE3  TRP   132      -0.313  -9.563  41.587  1.00  0.00      2S   
ATOM   1060 CZ3  TRP   132      -2.446  -9.446  41.326  1.00  1.00      2S   
ATOM   1061 HZ3  TRP   132      -2.461  -8.368  41.356  1.00  0.00      2S   
ATOM   1062 CZ2  TRP   132      -3.650 -11.539  41.022  1.00  1.00      2S   
ATOM   1063 HZ2  TRP   132      -4.574 -12.072  40.867  1.00  0.00      2S   
ATOM   1064 CH2  TRP   132      -3.644 -10.143  41.114  1.00  1.00      2S   
ATOM   1065 HH2  TRP   132      -4.573  -9.601  41.019  1.00  0.00      2S   
ATOM   1066 C    TRP   132       3.404 -11.539  40.543  1.00  1.00      2S   
ATOM   1067 O    TRP   132       4.253 -12.410  40.729  1.00  1.00      2S   
ATOM   1068 N    VAL   133       3.690 -10.218  40.563  1.00  1.00      2S   
ATOM   1069 HN   VAL   133       2.986  -9.537  40.365  1.00  0.00      2S   
ATOM   1070 CA   VAL   133       5.001  -9.686  40.853  1.00  1.00      2S   
ATOM   1071 HA   VAL   133       5.609 -10.454  41.309  1.00  0.00      2S   
ATOM   1072 CB   VAL   133       5.717  -9.132  39.628  1.00  1.00      2S   
ATOM   1073 HB   VAL   133       6.677  -8.652  39.928  1.00  0.00      2S   
ATOM   1074 CG1  VAL   133       6.035 -10.283  38.660  1.00  1.00      2S   
ATOM   1075 HG11 VAL   133       5.109 -10.793  38.326  1.00  0.00      2S   
ATOM   1076 HG12 VAL   133       6.694 -11.021  39.160  1.00  0.00      2S   
ATOM   1077 HG13 VAL   133       6.548  -9.887  37.758  1.00  0.00      2S   
ATOM   1078 CG2  VAL   133       4.845  -8.087  38.926  1.00  1.00      2S   
ATOM   1079 HG21 VAL   133       4.633  -7.232  39.600  1.00  0.00      2S   
ATOM   1080 HG22 VAL   133       3.879  -8.527  38.601  1.00  0.00      2S   
ATOM   1081 HG23 VAL   133       5.367  -7.697  38.027  1.00  0.00      2S   
ATOM   1082 C    VAL   133       4.830  -8.589  41.870  1.00  1.00      2S   
ATOM   1083 O    VAL   133       3.762  -7.989  41.988  1.00  1.00      2S   
ATOM   1084 N    ALA   134       5.900  -8.312  42.646  1.00  1.00      2S   
ATOM   1085 HN   ALA   134       6.768  -8.793  42.543  1.00  0.00      2S   
ATOM   1086 CA   ALA   134       5.850  -7.302  43.668  1.00  1.00      2S   
ATOM   1087 HA   ALA   134       5.408  -6.409  43.250  1.00  0.00      2S   
ATOM   1088 CB   ALA   134       5.066  -7.759  44.913  1.00  1.00      2S   
ATOM   1089 HB1  ALA   134       5.595  -8.579  45.444  1.00  0.00      2S   
ATOM   1090 HB2  ALA   134       4.076  -8.150  44.600  1.00  0.00      2S   
ATOM   1091 HB3  ALA   134       4.901  -6.912  45.611  1.00  0.00      2S   
ATOM   1092 C    ALA   134       7.255  -6.986  44.081  1.00  1.00      2S   
ATOM   1093 O    ALA   134       8.098  -7.875  44.170  1.00  1.00      2S   
ATOM   1094 N    THR   135       7.533  -5.690  44.340  1.00  1.00      2S   
ATOM   1095 HN   THR   135       6.838  -4.981  44.219  1.00  0.00      2S   
ATOM   1096 CA   THR   135       8.832  -5.216  44.762  1.00  1.00      2S   
ATOM   1097 HA   THR   135       9.590  -5.912  44.439  1.00  0.00      2S   
ATOM   1098 CB   THR   135       9.152  -3.840  44.201  1.00  1.00      2S   
ATOM   1099 HB   THR   135       8.506  -3.077  44.687  1.00  0.00      2S   
ATOM   1100 OG1  THR   135       8.920  -3.841  42.797  1.00  1.00      2S   
ATOM   1101 HG1  THR   135       9.066  -2.939  42.501  1.00  0.00      2S   
ATOM   1102 CG2  THR   135      10.616  -3.439  44.426  1.00  1.00      2S   
ATOM   1103 HG21 THR   135      11.288  -4.255  44.087  1.00  0.00      2S   
ATOM   1104 HG22 THR   135      10.797  -3.231  45.500  1.00  0.00      2S   
ATOM   1105 HG23 THR   135      10.852  -2.515  43.855  1.00  0.00      2S   
ATOM   1106 C    THR   135       8.824  -5.171  46.262  1.00  1.00      2S   
ATOM   1107 O    THR   135       7.776  -5.002  46.884  1.00  1.00      2S   
ATOM   1108 N    GLU   136      10.015  -5.325  46.883  1.00  1.00      2S   
ATOM   1109 HN   GLU   136      10.852  -5.476  46.362  1.00  0.00      2S   
ATOM   1110 CA   GLU   136      10.187  -5.269  48.313  1.00  1.00      2S   
ATOM   1111 HA   GLU   136       9.584  -6.057  48.741  1.00  0.00      2S   
ATOM   1112 CB   GLU   136      11.669  -5.495  48.695  1.00  1.00      2S   
ATOM   1113 HB1  GLU   136      12.287  -4.753  48.141  1.00  0.00      2S   
ATOM   1114 HB2  GLU   136      11.979  -6.505  48.344  1.00  0.00      2S   
ATOM   1115 CG   GLU   136      11.997  -5.359  50.196  1.00  1.00      2S   
ATOM   1116 HG1  GLU   136      11.564  -4.424  50.606  1.00  0.00      2S   
ATOM   1117 HG2  GLU   136      13.101  -5.300  50.310  1.00  0.00      2S   
ATOM   1118 CD   GLU   136      11.479  -6.548  51.005  1.00  1.00      2S   
ATOM   1119 OE1  GLU   136      10.236  -6.741  51.071  1.00  1.00      2S   
ATOM   1120 OE2  GLU   136      12.332  -7.275  51.583  1.00  1.00      2S   
ATOM   1121 C    GLU   136       9.714  -3.939  48.862  1.00  1.00      2S   
ATOM   1122 O    GLU   136      10.190  -2.880  48.456  1.00  1.00      2S   
ATOM   1123 N    GLY   137       8.728  -3.992  49.790  1.00  1.00      2S   
ATOM   1124 HN   GLY   137       8.365  -4.871  50.095  1.00  0.00      2S   
ATOM   1125 CA   GLY   137       8.212  -2.818  50.458  1.00  1.00      2S   
ATOM   1126 HA1  GLY   137       8.903  -1.999  50.319  1.00  0.00      2S   
ATOM   1127 HA2  GLY   137       8.089  -3.082  51.497  1.00  0.00      2S   
ATOM   1128 C    GLY   137       6.876  -2.363  49.941  1.00  1.00      2S   
ATOM   1129 O    GLY   137       6.389  -1.315  50.359  1.00  1.00      2S   
ATOM   1130 N    ALA   138       6.234  -3.121  49.023  1.00  1.00      2S   
ATOM   1131 HN   ALA   138       6.609  -3.984  48.692  1.00  0.00      2S   
ATOM   1132 CA   ALA   138       4.991  -2.702  48.416  1.00  1.00      2S   
ATOM   1133 HA   ALA   138       5.011  -1.629  48.282  1.00  0.00      2S   
ATOM   1134 CB   ALA   138       4.787  -3.360  47.045  1.00  1.00      2S   
ATOM   1135 HB1  ALA   138       4.779  -4.468  47.141  1.00  0.00      2S   
ATOM   1136 HB2  ALA   138       5.626  -3.079  46.372  1.00  0.00      2S   
ATOM   1137 HB3  ALA   138       3.837  -3.030  46.575  1.00  0.00      2S   
ATOM   1138 C    ALA   138       3.820  -3.048  49.297  1.00  1.00      2S   
ATOM   1139 O    ALA   138       3.888  -3.956  50.124  1.00  1.00      2S   
ATOM   1140 N    LEU   139       2.707  -2.298  49.136  1.00  1.00      2S   
ATOM   1141 HN   LEU   139       2.671  -1.560  48.465  1.00  0.00      2S   
ATOM   1142 CA   LEU   139       1.519  -2.479  49.934  1.00  1.00      2S   
ATOM   1143 HA   LEU   139       1.740  -3.102  50.789  1.00  0.00      2S   
ATOM   1144 CB   LEU   139       0.923  -1.137  50.413  1.00  1.00      2S   
ATOM   1145 HB1  LEU   139      -0.015  -1.336  50.977  1.00  0.00      2S   
ATOM   1146 HB2  LEU   139       0.674  -0.513  49.528  1.00  0.00      2S   
ATOM   1147 CG   LEU   139       1.848  -0.308  51.333  1.00  1.00      2S   
ATOM   1148 HG   LEU   139       2.800  -0.096  50.792  1.00  0.00      2S   
ATOM   1149 CD1  LEU   139       1.187   1.040  51.672  1.00  1.00      2S   
ATOM   1150 HD11 LEU   139       0.225   0.870  52.201  1.00  0.00      2S   
ATOM   1151 HD12 LEU   139       0.979   1.614  50.746  1.00  0.00      2S   
ATOM   1152 HD13 LEU   139       1.853   1.645  52.323  1.00  0.00      2S   
ATOM   1153 CD2  LEU   139       2.202  -1.071  52.619  1.00  1.00      2S   
ATOM   1154 HD21 LEU   139       2.744  -2.009  52.379  1.00  0.00      2S   
ATOM   1155 HD22 LEU   139       1.273  -1.320  53.173  1.00  0.00      2S   
ATOM   1156 HD23 LEU   139       2.853  -0.446  53.266  1.00  0.00      2S   
ATOM   1157 C    LEU   139       0.481  -3.182  49.109  1.00  1.00      2S   
ATOM   1158 O    LEU   139       0.278  -2.859  47.941  1.00  1.00      2S   
ATOM   1159 N    ASN   140      -0.217  -4.168  49.721  1.00  1.00      2S   
ATOM   1160 HN   ASN   140      -0.022  -4.421  50.666  1.00  0.00      2S   
ATOM   1161 CA   ASN   140      -1.237  -4.958  49.069  1.00  1.00      2S   
ATOM   1162 HA   ASN   140      -0.943  -5.109  48.039  1.00  0.00      2S   
ATOM   1163 CB   ASN   140      -1.382  -6.333  49.767  1.00  1.00      2S   
ATOM   1164 HB1  ASN   140      -1.848  -6.215  50.768  1.00  0.00      2S   
ATOM   1165 HB2  ASN   140      -0.360  -6.751  49.914  1.00  0.00      2S   
ATOM   1166 CG   ASN   140      -2.207  -7.324  48.936  1.00  1.00      2S   
ATOM   1167 OD1  ASN   140      -3.123  -6.969  48.190  1.00  1.00      2S   
ATOM   1168 ND2  ASN   140      -1.864  -8.633  49.089  1.00  1.00      2S   
ATOM   1169 HD21 ASN   140      -2.365  -9.323  48.568  1.00  0.00      2S   
ATOM   1170 HD22 ASN   140      -1.107  -8.885  49.688  1.00  0.00      2S   
ATOM   1171 C    ASN   140      -2.546  -4.202  49.094  1.00  1.00      2S   
ATOM   1172 O    ASN   140      -3.456  -4.506  49.866  1.00  1.00      2S   
ATOM   1173 N    THR   141      -2.648  -3.176  48.229  1.00  1.00      2S   
ATOM   1174 HN   THR   141      -1.887  -2.951  47.624  1.00  0.00      2S   
ATOM   1175 CA   THR   141      -3.798  -2.307  48.164  1.00  1.00      2S   
ATOM   1176 HA   THR   141      -4.633  -2.811  48.623  1.00  0.00      2S   
ATOM   1177 CB   THR   141      -3.575  -0.960  48.851  1.00  1.00      2S   
ATOM   1178 HB   THR   141      -4.425  -0.270  48.668  1.00  0.00      2S   
ATOM   1179 OG1  THR   141      -2.410  -0.332  48.376  1.00  1.00      2S   
ATOM   1180 HG1  THR   141      -2.244   0.432  48.930  1.00  0.00      2S   
ATOM   1181 CG2  THR   141      -3.378  -1.149  50.359  1.00  1.00      2S   
ATOM   1182 HG21 THR   141      -2.505  -1.804  50.567  1.00  0.00      2S   
ATOM   1183 HG22 THR   141      -4.287  -1.604  50.801  1.00  0.00      2S   
ATOM   1184 HG23 THR   141      -3.192  -0.165  50.841  1.00  0.00      2S   
ATOM   1185 C    THR   141      -4.115  -2.101  46.702  1.00  1.00      2S   
ATOM   1186 O    THR   141      -3.243  -2.291  45.857  1.00  1.00      2S   
ATOM   1187 N    PRO   142      -5.327  -1.718  46.333  1.00  1.00      2S   
ATOM   1188 CD   PRO   142      -6.509  -1.727  47.200  1.00  1.00      2S   
ATOM   1189 HD1  PRO   142      -6.327  -1.175  48.146  1.00  0.00      2S   
ATOM   1190 HD2  PRO   142      -6.793  -2.780  47.419  1.00  0.00      2S   
ATOM   1191 CA   PRO   142      -5.654  -1.385  44.960  1.00  1.00      2S   
ATOM   1192 HA   PRO   142      -5.268  -2.148  44.300  1.00  0.00      2S   
ATOM   1193 CB   PRO   142      -7.183  -1.324  44.935  1.00  1.00      2S   
ATOM   1194 HB1  PRO   142      -7.590  -2.309  44.620  1.00  0.00      2S   
ATOM   1195 HB2  PRO   142      -7.571  -0.544  44.256  1.00  0.00      2S   
ATOM   1196 CG   PRO   142      -7.595  -1.039  46.381  1.00  1.00      2S   
ATOM   1197 HG1  PRO   142      -7.556   0.058  46.561  1.00  0.00      2S   
ATOM   1198 HG2  PRO   142      -8.608  -1.425  46.607  1.00  0.00      2S   
ATOM   1199 C    PRO   142      -5.050  -0.056  44.560  1.00  1.00      2S   
ATOM   1200 O    PRO   142      -5.232   0.941  45.258  1.00  1.00      2S   
ATOM   1201 N    LYS   143      -4.322  -0.034  43.424  1.00  1.00      2S   
ATOM   1202 HN   LYS   143      -4.167  -0.877  42.907  1.00  0.00      2S   
ATOM   1203 CA   LYS   143      -3.634   1.133  42.930  1.00  1.00      2S   
ATOM   1204 HA   LYS   143      -3.473   1.820  43.748  1.00  0.00      2S   
ATOM   1205 CB   LYS   143      -2.272   0.778  42.294  1.00  1.00      2S   
ATOM   1206 HB1  LYS   143      -1.704   1.716  42.108  1.00  0.00      2S   
ATOM   1207 HB2  LYS   143      -2.434   0.260  41.323  1.00  0.00      2S   
ATOM   1208 CG   LYS   143      -1.417  -0.151  43.167  1.00  1.00      2S   
ATOM   1209 HG1  LYS   143      -0.422  -0.286  42.687  1.00  0.00      2S   
ATOM   1210 HG2  LYS   143      -1.899  -1.152  43.229  1.00  0.00      2S   
ATOM   1211 CD   LYS   143      -1.214   0.379  44.588  1.00  1.00      2S   
ATOM   1212 HD1  LYS   143      -2.192   0.623  45.058  1.00  0.00      2S   
ATOM   1213 HD2  LYS   143      -0.631   1.318  44.523  1.00  0.00      2S   
ATOM   1214 CE   LYS   143      -0.497  -0.639  45.464  1.00  1.00      2S   
ATOM   1215 HE1  LYS   143       0.494  -0.899  45.054  1.00  0.00      2S   
ATOM   1216 HE2  LYS   143      -1.073  -1.578  45.545  1.00  0.00      2S   
ATOM   1217 NZ   LYS   143      -0.296  -0.097  46.811  1.00  1.00      2S   
ATOM   1218 HZ1  LYS   143      -1.041  -0.503  47.423  1.00  0.00      2S   
ATOM   1219 HZ2  LYS   143      -0.393   0.938  46.827  1.00  0.00      2S   
ATOM   1220 HZ3  LYS   143       0.633  -0.377  47.190  1.00  0.00      2S   
ATOM   1221 C    LYS   143      -4.489   1.828  41.917  1.00  1.00      2S   
ATOM   1222 O    LYS   143      -4.119   2.001  40.757  1.00  1.00      2S   
ATOM   1223 N    ASP   144      -5.675   2.276  42.363  1.00  1.00      2S   
ATOM   1224 HN   ASP   144      -5.966   2.100  43.302  1.00  0.00      2S   
ATOM   1225 CA   ASP   144      -6.680   2.857  41.508  1.00  1.00      2S   
ATOM   1226 HA   ASP   144      -6.795   2.222  40.642  1.00  0.00      2S   
ATOM   1227 CB   ASP   144      -8.032   2.972  42.240  1.00  1.00      2S   
ATOM   1228 HB1  ASP   144      -8.819   3.342  41.549  1.00  0.00      2S   
ATOM   1229 HB2  ASP   144      -7.908   3.684  43.078  1.00  0.00      2S   
ATOM   1230 CG   ASP   144      -8.483   1.626  42.809  1.00  1.00      2S   
ATOM   1231 OD1  ASP   144      -8.097   0.574  42.237  1.00  1.00      2S   
ATOM   1232 OD2  ASP   144      -9.225   1.639  43.827  1.00  1.00      2S   
ATOM   1233 C    ASP   144      -6.277   4.226  41.020  1.00  1.00      2S   
ATOM   1234 O    ASP   144      -6.703   4.657  39.951  1.00  1.00      2S   
ATOM   1235 N    HSD   145      -5.406   4.938  41.771  1.00  1.00      2S   
ATOM   1236 HN   HSD   145      -5.066   4.587  42.642  1.00  0.00      2S   
ATOM   1237 CA   HSD   145      -4.934   6.252  41.408  1.00  1.00      2S   
ATOM   1238 HA   HSD   145      -5.801   6.842  41.152  1.00  0.00      2S   
ATOM   1239 CB   HSD   145      -4.204   6.949  42.578  1.00  1.00      2S   
ATOM   1240 HB1  HSD   145      -4.928   7.092  43.411  1.00  0.00      2S   
ATOM   1241 HB2  HSD   145      -3.851   7.951  42.259  1.00  0.00      2S   
ATOM   1242 ND1  HSD   145      -3.160   5.118  43.970  1.00  1.00      2S   
ATOM   1243 HD1  HSD   145      -4.031   4.757  44.310  1.00  0.00      2S   
ATOM   1244 CG   HSD   145      -3.035   6.189  43.122  1.00  1.00      2S   
ATOM   1245 CE1  HSD   145      -1.925   4.659  44.234  1.00  1.00      2S   
ATOM   1246 HE1  HSD   145      -1.741   3.818  44.904  1.00  0.00      2S   
ATOM   1247 NE2  HSD   145      -1.012   5.362  43.606  1.00  1.00      2S   
ATOM   1248 CD2  HSD   145      -1.707   6.333  42.911  1.00  1.00      2S   
ATOM   1249 HD2  HSD   145      -1.172   7.070  42.326  1.00  0.00      2S   
ATOM   1250 C    HSD   145      -4.036   6.229  40.192  1.00  1.00      2S   
ATOM   1251 O    HSD   145      -3.901   7.235  39.500  1.00  1.00      2S   
ATOM   1252 N    ILE   146      -3.422   5.070  39.871  1.00  1.00      2S   
ATOM   1253 HN   ILE   146      -3.505   4.258  40.446  1.00  0.00      2S   
ATOM   1254 CA   ILE   146      -2.639   4.916  38.667  1.00  1.00      2S   
ATOM   1255 HA   ILE   146      -2.168   5.861  38.435  1.00  0.00      2S   
ATOM   1256 CB   ILE   146      -1.559   3.862  38.840  1.00  1.00      2S   
ATOM   1257 HB   ILE   146      -2.024   2.895  39.137  1.00  0.00      2S   
ATOM   1258 CG2  ILE   146      -0.791   3.660  37.517  1.00  1.00      2S   
ATOM   1259 HG21 ILE   146      -0.321   4.614  37.199  1.00  0.00      2S   
ATOM   1260 HG22 ILE   146      -1.462   3.296  36.713  1.00  0.00      2S   
ATOM   1261 HG23 ILE   146       0.005   2.902  37.648  1.00  0.00      2S   
ATOM   1262 CG1  ILE   146      -0.598   4.295  39.971  1.00  1.00      2S   
ATOM   1263 HG11 ILE   146      -1.171   4.422  40.915  1.00  0.00      2S   
ATOM   1264 HG12 ILE   146      -0.146   5.277  39.706  1.00  0.00      2S   
ATOM   1265 CD   ILE   146       0.520   3.283  40.221  1.00  1.00      2S   
ATOM   1266 HD1  ILE   146       1.238   3.273  39.374  1.00  0.00      2S   
ATOM   1267 HD2  ILE   146       0.092   2.263  40.336  1.00  0.00      2S   
ATOM   1268 HD3  ILE   146       1.075   3.550  41.142  1.00  0.00      2S   
ATOM   1269 C    ILE   146      -3.552   4.592  37.509  1.00  1.00      2S   
ATOM   1270 O    ILE   146      -3.455   5.214  36.452  1.00  1.00      2S   
ATOM   1271 N    GLY   147      -4.468   3.609  37.675  1.00  1.00      2S   
ATOM   1272 HN   GLY   147      -4.538   3.097  38.529  1.00  0.00      2S   
ATOM   1273 CA   GLY   147      -5.452   3.298  36.661  1.00  1.00      2S   
ATOM   1274 HA1  GLY   147      -5.952   4.214  36.378  1.00  0.00      2S   
ATOM   1275 HA2  GLY   147      -6.122   2.559  37.073  1.00  0.00      2S   
ATOM   1276 C    GLY   147      -4.820   2.696  35.449  1.00  1.00      2S   
ATOM   1277 O    GLY   147      -3.771   2.062  35.528  1.00  1.00      2S   
ATOM   1278 N    THR   148      -5.474   2.888  34.291  1.00  1.00      2S   
ATOM   1279 HN   THR   148      -6.323   3.407  34.245  1.00  0.00      2S   
ATOM   1280 CA   THR   148      -5.051   2.321  33.045  1.00  1.00      2S   
ATOM   1281 HA   THR   148      -4.019   2.009  33.085  1.00  0.00      2S   
ATOM   1282 CB   THR   148      -5.905   1.131  32.632  1.00  1.00      2S   
ATOM   1283 HB   THR   148      -5.613   0.819  31.616  1.00  0.00      2S   
ATOM   1284 OG1  THR   148      -7.294   1.436  32.600  1.00  1.00      2S   
ATOM   1285 HG1  THR   148      -7.375   2.139  31.947  1.00  0.00      2S   
ATOM   1286 CG2  THR   148      -5.671  -0.026  33.624  1.00  1.00      2S   
ATOM   1287 HG21 THR   148      -6.120   0.222  34.609  1.00  0.00      2S   
ATOM   1288 HG22 THR   148      -4.587  -0.214  33.767  1.00  0.00      2S   
ATOM   1289 HG23 THR   148      -6.144  -0.956  33.249  1.00  0.00      2S   
ATOM   1290 C    THR   148      -5.152   3.423  32.037  1.00  1.00      2S   
ATOM   1291 O    THR   148      -6.218   4.021  31.888  1.00  1.00      2S   
ATOM   1292 N    ARG   149      -4.052   3.694  31.290  1.00  1.00      2S   
ATOM   1293 HN   ARG   149      -3.176   3.244  31.442  1.00  0.00      2S   
ATOM   1294 CA   ARG   149      -4.100   4.543  30.126  1.00  1.00      2S   
ATOM   1295 HA   ARG   149      -4.683   5.422  30.387  1.00  0.00      2S   
ATOM   1296 CB   ARG   149      -2.681   5.065  29.757  1.00  1.00      2S   
ATOM   1297 HB1  ARG   149      -2.192   5.476  30.670  1.00  0.00      2S   
ATOM   1298 HB2  ARG   149      -2.749   5.910  29.039  1.00  0.00      2S   
ATOM   1299 CG   ARG   149      -1.745   3.986  29.220  1.00  1.00      2S   
ATOM   1300 HG1  ARG   149      -2.314   3.208  28.688  1.00  0.00      2S   
ATOM   1301 HG2  ARG   149      -1.279   3.450  30.065  1.00  0.00      2S   
ATOM   1302 CD   ARG   149      -0.735   4.525  28.219  1.00  1.00      2S   
ATOM   1303 HD1  ARG   149      -0.032   5.219  28.722  1.00  0.00      2S   
ATOM   1304 HD2  ARG   149      -1.247   5.048  27.379  1.00  0.00      2S   
ATOM   1305 NE   ARG   149       0.035   3.361  27.686  1.00  1.00      2S   
ATOM   1306 HE   ARG   149       0.913   3.140  28.109  1.00  0.00      2S   
ATOM   1307 CZ   ARG   149      -0.397   2.601  26.640  1.00  1.00      2S   
ATOM   1308 NH1  ARG   149      -1.579   2.851  26.019  1.00  1.00      2S   
ATOM   1309 HH11 ARG   149      -1.841   2.336  25.207  1.00  0.00      2S   
ATOM   1310 HH12 ARG   149      -2.227   3.486  26.443  1.00  0.00      2S   
ATOM   1311 NH2  ARG   149       0.387   1.584  26.199  1.00  1.00      2S   
ATOM   1312 HH21 ARG   149       1.204   1.336  26.718  1.00  0.00      2S   
ATOM   1313 HH22 ARG   149       0.139   1.092  25.368  1.00  0.00      2S   
ATOM   1314 C    ARG   149      -4.816   3.670  29.023  1.00  1.00      2S   
ATOM   1315 OT1  ARG   149      -4.300   3.417  27.910  1.00  1.00      2S   
ATOM   1316 OT2  ARG   149      -5.922   3.156  29.327  1.00  0.00      2S   
TER 
ATOM   1317 N    ALA   156       2.595   4.995  24.900  1.00  1.00      3S   
ATOM   1318 HT1  ALA   156       2.529   5.800  25.556  1.00  0.00      3S   
ATOM   1319 HT2  ALA   156       1.671   4.824  24.455  1.00  0.00      3S   
ATOM   1320 HT3  ALA   156       3.304   5.206  24.169  1.00  0.00      3S   
ATOM   1321 CA   ALA   156       3.027   3.789  25.647  1.00  1.00      3S   
ATOM   1322 HA   ALA   156       2.275   3.594  26.393  1.00  0.00      3S   
ATOM   1323 CB   ALA   156       3.152   2.593  24.684  1.00  1.00      3S   
ATOM   1324 HB1  ALA   156       3.911   2.797  23.898  1.00  0.00      3S   
ATOM   1325 HB2  ALA   156       2.178   2.397  24.187  1.00  0.00      3S   
ATOM   1326 HB3  ALA   156       3.447   1.674  25.234  1.00  0.00      3S   
ATOM   1327 C    ALA   156       4.330   4.013  26.346  1.00  1.00      3S   
ATOM   1328 O    ALA   156       4.999   5.022  26.129  1.00  1.00      3S   
ATOM   1329 N    ILE   157       4.702   3.072  27.242  1.00  1.00      3S   
ATOM   1330 HN   ILE   157       4.128   2.281  27.448  1.00  0.00      3S   
ATOM   1331 CA   ILE   157       5.930   3.160  27.991  1.00  1.00      3S   
ATOM   1332 HA   ILE   157       6.566   3.930  27.580  1.00  0.00      3S   
ATOM   1333 CB   ILE   157       5.718   3.417  29.482  1.00  1.00      3S   
ATOM   1334 HB   ILE   157       5.018   2.661  29.907  1.00  0.00      3S   
ATOM   1335 CG2  ILE   157       7.055   3.304  30.246  1.00  1.00      3S   
ATOM   1336 HG21 ILE   157       7.839   3.910  29.747  1.00  0.00      3S   
ATOM   1337 HG22 ILE   157       7.391   2.249  30.292  1.00  0.00      3S   
ATOM   1338 HG23 ILE   157       6.931   3.664  31.289  1.00  0.00      3S   
ATOM   1339 CG1  ILE   157       5.099   4.814  29.705  1.00  1.00      3S   
ATOM   1340 HG11 ILE   157       5.443   5.503  28.904  1.00  0.00      3S   
ATOM   1341 HG12 ILE   157       5.466   5.212  30.677  1.00  0.00      3S   
ATOM   1342 CD   ILE   157       3.573   4.792  29.753  1.00  1.00      3S   
ATOM   1343 HD1  ILE   157       3.234   4.007  30.463  1.00  0.00      3S   
ATOM   1344 HD2  ILE   157       3.144   4.568  28.757  1.00  0.00      3S   
ATOM   1345 HD3  ILE   157       3.185   5.776  30.091  1.00  0.00      3S   
ATOM   1346 C    ILE   157       6.624   1.856  27.794  1.00  1.00      3S   
ATOM   1347 O    ILE   157       6.064   0.806  28.081  1.00  1.00      3S   
ATOM   1348 N    VAL   158       7.891   1.878  27.321  1.00  1.00      3S   
ATOM   1349 HN   VAL   158       8.334   2.732  27.061  1.00  0.00      3S   
ATOM   1350 CA   VAL   158       8.711   0.693  27.183  1.00  1.00      3S   
ATOM   1351 HA   VAL   158       8.219   0.026  26.490  1.00  0.00      3S   
ATOM   1352 CB   VAL   158      10.105   1.023  26.660  1.00  1.00      3S   
ATOM   1353 HB   VAL   158      10.555   1.828  27.285  1.00  0.00      3S   
ATOM   1354 CG1  VAL   158      11.029  -0.210  26.709  1.00  1.00      3S   
ATOM   1355 HG11 VAL   158      10.531  -1.081  26.234  1.00  0.00      3S   
ATOM   1356 HG12 VAL   158      11.289  -0.465  27.758  1.00  0.00      3S   
ATOM   1357 HG13 VAL   158      11.971   0.002  26.161  1.00  0.00      3S   
ATOM   1358 CG2  VAL   158       9.989   1.546  25.216  1.00  1.00      3S   
ATOM   1359 HG21 VAL   158       9.365   2.462  25.171  1.00  0.00      3S   
ATOM   1360 HG22 VAL   158       9.543   0.768  24.561  1.00  0.00      3S   
ATOM   1361 HG23 VAL   158      11.001   1.793  24.829  1.00  0.00      3S   
ATOM   1362 C    VAL   158       8.814  -0.002  28.518  1.00  1.00      3S   
ATOM   1363 O    VAL   158       9.164   0.612  29.524  1.00  1.00      3S   
ATOM   1364 N    LEU   159       8.464  -1.308  28.551  1.00  1.00      3S   
ATOM   1365 HN   LEU   159       8.104  -1.775  27.742  1.00  0.00      3S   
ATOM   1366 CA   LEU   159       8.549  -2.104  29.746  1.00  1.00      3S   
ATOM   1367 HA   LEU   159       8.047  -1.569  30.543  1.00  0.00      3S   
ATOM   1368 CB   LEU   159       7.871  -3.469  29.548  1.00  1.00      3S   
ATOM   1369 HB1  LEU   159       8.440  -4.086  28.819  1.00  0.00      3S   
ATOM   1370 HB2  LEU   159       6.878  -3.264  29.096  1.00  0.00      3S   
ATOM   1371 CG   LEU   159       7.641  -4.284  30.833  1.00  1.00      3S   
ATOM   1372 HG   LEU   159       7.588  -3.586  31.697  1.00  0.00      3S   
ATOM   1373 CD1  LEU   159       6.299  -5.023  30.765  1.00  1.00      3S   
ATOM   1374 HD11 LEU   159       6.283  -5.718  29.900  1.00  0.00      3S   
ATOM   1375 HD12 LEU   159       5.459  -4.306  30.659  1.00  0.00      3S   
ATOM   1376 HD13 LEU   159       6.153  -5.599  31.698  1.00  0.00      3S   
ATOM   1377 CD2  LEU   159       8.789  -5.268  31.085  1.00  1.00      3S   
ATOM   1378 HD21 LEU   159       9.716  -4.725  31.355  1.00  0.00      3S   
ATOM   1379 HD22 LEU   159       8.979  -5.846  30.159  1.00  0.00      3S   
ATOM   1380 HD23 LEU   159       8.528  -5.972  31.903  1.00  0.00      3S   
ATOM   1381 C    LEU   159      10.000  -2.294  30.089  1.00  1.00      3S   
ATOM   1382 O    LEU   159      10.720  -3.028  29.415  1.00  1.00      3S   
ATOM   1383 N    GLN   160      10.462  -1.567  31.127  1.00  1.00      3S   
ATOM   1384 HN   GLN   160       9.860  -0.959  31.640  1.00  0.00      3S   
ATOM   1385 CA   GLN   160      11.857  -1.514  31.469  1.00  1.00      3S   
ATOM   1386 HA   GLN   160      12.437  -2.091  30.764  1.00  0.00      3S   
ATOM   1387 CB   GLN   160      12.380  -0.061  31.491  1.00  1.00      3S   
ATOM   1388 HB1  GLN   160      11.995   0.479  32.384  1.00  0.00      3S   
ATOM   1389 HB2  GLN   160      11.960   0.444  30.592  1.00  0.00      3S   
ATOM   1390 CG   GLN   160      13.914   0.040  31.451  1.00  1.00      3S   
ATOM   1391 HG1  GLN   160      14.313  -0.647  30.675  1.00  0.00      3S   
ATOM   1392 HG2  GLN   160      14.336  -0.254  32.434  1.00  0.00      3S   
ATOM   1393 CD   GLN   160      14.345   1.471  31.110  1.00  1.00      3S   
ATOM   1394 OE1  GLN   160      13.540   2.323  30.720  1.00  1.00      3S   
ATOM   1395 NE2  GLN   160      15.677   1.729  31.256  1.00  1.00      3S   
ATOM   1396 HE21 GLN   160      16.023   2.641  31.040  1.00  0.00      3S   
ATOM   1397 HE22 GLN   160      16.291   1.009  31.574  1.00  0.00      3S   
ATOM   1398 C    GLN   160      11.997  -2.136  32.814  1.00  1.00      3S   
ATOM   1399 O    GLN   160      11.264  -1.787  33.728  1.00  1.00      3S   
ATOM   1400 N    LEU   161      12.923  -3.101  32.959  1.00  1.00      3S   
ATOM   1401 HN   LEU   161      13.459  -3.423  32.184  1.00  0.00      3S   
ATOM   1402 CA   LEU   161      13.168  -3.762  34.216  1.00  1.00      3S   
ATOM   1403 HA   LEU   161      12.448  -3.424  34.940  1.00  0.00      3S   
ATOM   1404 CB   LEU   161      13.091  -5.295  34.077  1.00  1.00      3S   
ATOM   1405 HB1  LEU   161      13.373  -5.769  35.040  1.00  0.00      3S   
ATOM   1406 HB2  LEU   161      13.812  -5.629  33.298  1.00  0.00      3S   
ATOM   1407 CG   LEU   161      11.686  -5.806  33.707  1.00  1.00      3S   
ATOM   1408 HG   LEU   161      11.363  -5.302  32.768  1.00  0.00      3S   
ATOM   1409 CD1  LEU   161      11.722  -7.311  33.435  1.00  1.00      3S   
ATOM   1410 HD11 LEU   161      11.887  -7.859  34.381  1.00  0.00      3S   
ATOM   1411 HD12 LEU   161      12.553  -7.549  32.739  1.00  0.00      3S   
ATOM   1412 HD13 LEU   161      10.763  -7.658  32.999  1.00  0.00      3S   
ATOM   1413 CD2  LEU   161      10.666  -5.486  34.808  1.00  1.00      3S   
ATOM   1414 HD21 LEU   161      10.598  -4.391  34.958  1.00  0.00      3S   
ATOM   1415 HD22 LEU   161      10.983  -5.951  35.766  1.00  0.00      3S   
ATOM   1416 HD23 LEU   161       9.662  -5.868  34.532  1.00  0.00      3S   
ATOM   1417 C    LEU   161      14.543  -3.396  34.697  1.00  1.00      3S   
ATOM   1418 O    LEU   161      15.396  -3.068  33.871  1.00  1.00      3S   
ATOM   1419 N    PRO   162      14.830  -3.446  36.006  1.00  1.00      3S   
ATOM   1420 CD   PRO   162      13.844  -3.627  37.079  1.00  1.00      3S   
ATOM   1421 HD1  PRO   162      13.641  -4.713  37.200  1.00  0.00      3S   
ATOM   1422 HD2  PRO   162      12.896  -3.081  36.880  1.00  0.00      3S   
ATOM   1423 CA   PRO   162      16.145  -3.113  36.531  1.00  1.00      3S   
ATOM   1424 HA   PRO   162      16.406  -2.113  36.216  1.00  0.00      3S   
ATOM   1425 CB   PRO   162      16.005  -3.250  38.057  1.00  1.00      3S   
ATOM   1426 HB1  PRO   162      16.607  -2.488  38.593  1.00  0.00      3S   
ATOM   1427 HB2  PRO   162      16.303  -4.265  38.401  1.00  0.00      3S   
ATOM   1428 CG   PRO   162      14.510  -3.064  38.332  1.00  1.00      3S   
ATOM   1429 HG1  PRO   162      14.186  -3.592  39.251  1.00  0.00      3S   
ATOM   1430 HG2  PRO   162      14.277  -1.980  38.418  1.00  0.00      3S   
ATOM   1431 C    PRO   162      17.185  -4.061  36.004  1.00  1.00      3S   
ATOM   1432 O    PRO   162      16.878  -5.220  35.742  1.00  1.00      3S   
ATOM   1433 N    GLN   163      18.425  -3.578  35.816  1.00  1.00      3S   
ATOM   1434 HN   GLN   163      18.639  -2.625  36.010  1.00  0.00      3S   
ATOM   1435 CA   GLN   163      19.493  -4.371  35.261  1.00  1.00      3S   
ATOM   1436 HA   GLN   163      19.165  -4.763  34.307  1.00  0.00      3S   
ATOM   1437 CB   GLN   163      20.766  -3.521  35.068  1.00  1.00      3S   
ATOM   1438 HB1  GLN   163      21.653  -4.175  34.924  1.00  0.00      3S   
ATOM   1439 HB2  GLN   163      20.927  -2.931  35.999  1.00  0.00      3S   
ATOM   1440 CG   GLN   163      20.673  -2.530  33.892  1.00  1.00      3S   
ATOM   1441 HG1  GLN   163      21.536  -1.832  33.940  1.00  0.00      3S   
ATOM   1442 HG2  GLN   163      19.734  -1.941  33.963  1.00  0.00      3S   
ATOM   1443 CD   GLN   163      20.724  -3.266  32.547  1.00  1.00      3S   
ATOM   1444 OE1  GLN   163      21.197  -4.402  32.440  1.00  1.00      3S   
ATOM   1445 NE2  GLN   163      20.224  -2.572  31.483  1.00  1.00      3S   
ATOM   1446 HE21 GLN   163      20.231  -2.993  30.577  1.00  0.00      3S   
ATOM   1447 HE22 GLN   163      19.854  -1.654  31.620  1.00  0.00      3S   
ATOM   1448 C    GLN   163      19.810  -5.532  36.173  1.00  1.00      3S   
ATOM   1449 O    GLN   163      20.154  -5.341  37.338  1.00  1.00      3S   
ATOM   1450 N    GLY   164      19.647  -6.769  35.646  1.00  1.00      3S   
ATOM   1451 HN   GLY   164      19.397  -6.888  34.687  1.00  0.00      3S   
ATOM   1452 CA   GLY   164      19.863  -7.978  36.410  1.00  1.00      3S   
ATOM   1453 HA1  GLY   164      20.305  -7.727  37.363  1.00  0.00      3S   
ATOM   1454 HA2  GLY   164      20.495  -8.615  35.812  1.00  0.00      3S   
ATOM   1455 C    GLY   164      18.597  -8.732  36.705  1.00  1.00      3S   
ATOM   1456 O    GLY   164      18.611  -9.647  37.527  1.00  1.00      3S   
ATOM   1457 N    THR   165      17.465  -8.394  36.047  1.00  1.00      3S   
ATOM   1458 HN   THR   165      17.440  -7.645  35.390  1.00  0.00      3S   
ATOM   1459 CA   THR   165      16.202  -9.061  36.288  1.00  1.00      3S   
ATOM   1460 HA   THR   165      16.093  -9.218  37.354  1.00  0.00      3S   
ATOM   1461 CB   THR   165      15.026  -8.244  35.797  1.00  1.00      3S   
ATOM   1462 HB   THR   165      15.098  -8.060  34.701  1.00  0.00      3S   
ATOM   1463 OG1  THR   165      15.014  -6.996  36.470  1.00  1.00      3S   
ATOM   1464 HG1  THR   165      15.749  -6.488  36.105  1.00  0.00      3S   
ATOM   1465 CG2  THR   165      13.702  -8.952  36.114  1.00  1.00      3S   
ATOM   1466 HG21 THR   165      13.733  -9.406  37.123  1.00  0.00      3S   
ATOM   1467 HG22 THR   165      13.516  -9.750  35.367  1.00  0.00      3S   
ATOM   1468 HG23 THR   165      12.860  -8.228  36.087  1.00  0.00      3S   
ATOM   1469 C    THR   165      16.207 -10.400  35.603  1.00  1.00      3S   
ATOM   1470 O    THR   165      16.445 -10.492  34.400  1.00  1.00      3S   
ATOM   1471 N    THR   166      15.953 -11.482  36.377  1.00  1.00      3S   
ATOM   1472 HN   THR   166      15.772 -11.387  37.355  1.00  0.00      3S   
ATOM   1473 CA   THR   166      15.957 -12.838  35.879  1.00  1.00      3S   
ATOM   1474 HA   THR   166      16.837 -12.970  35.264  1.00  0.00      3S   
ATOM   1475 CB   THR   166      15.992 -13.848  37.012  1.00  1.00      3S   
ATOM   1476 HB   THR   166      15.139 -13.677  37.706  1.00  0.00      3S   
ATOM   1477 OG1  THR   166      17.203 -13.695  37.744  1.00  1.00      3S   
ATOM   1478 HG1  THR   166      17.258 -12.767  37.985  1.00  0.00      3S   
ATOM   1479 CG2  THR   166      15.923 -15.288  36.468  1.00  1.00      3S   
ATOM   1480 HG21 THR   166      16.681 -15.434  35.670  1.00  0.00      3S   
ATOM   1481 HG22 THR   166      14.916 -15.496  36.049  1.00  0.00      3S   
ATOM   1482 HG23 THR   166      16.113 -16.017  37.283  1.00  0.00      3S   
ATOM   1483 C    THR   166      14.736 -13.064  35.021  1.00  1.00      3S   
ATOM   1484 O    THR   166      13.611 -13.137  35.515  1.00  1.00      3S   
ATOM   1485 N    LEU   167      14.964 -13.158  33.691  1.00  1.00      3S   
ATOM   1486 HN   LEU   167      15.880 -13.046  33.317  1.00  0.00      3S   
ATOM   1487 CA   LEU   167      13.928 -13.350  32.712  1.00  1.00      3S   
ATOM   1488 HA   LEU   167      12.988 -13.099  33.166  1.00  0.00      3S   
ATOM   1489 CB   LEU   167      14.139 -12.466  31.468  1.00  1.00      3S   
ATOM   1490 HB1  LEU   167      13.398 -12.736  30.684  1.00  0.00      3S   
ATOM   1491 HB2  LEU   167      15.158 -12.649  31.062  1.00  0.00      3S   
ATOM   1492 CG   LEU   167      13.985 -10.961  31.744  1.00  1.00      3S   
ATOM   1493 HG   LEU   167      14.588 -10.688  32.641  1.00  0.00      3S   
ATOM   1494 CD1  LEU   167      14.517 -10.150  30.555  1.00  1.00      3S   
ATOM   1495 HD11 LEU   167      13.939 -10.405  29.640  1.00  0.00      3S   
ATOM   1496 HD12 LEU   167      15.587 -10.388  30.379  1.00  0.00      3S   
ATOM   1497 HD13 LEU   167      14.417  -9.063  30.753  1.00  0.00      3S   
ATOM   1498 CD2  LEU   167      12.520 -10.609  32.026  1.00  1.00      3S   
ATOM   1499 HD21 LEU   167      12.153 -11.158  32.915  1.00  0.00      3S   
ATOM   1500 HD22 LEU   167      11.888 -10.876  31.153  1.00  0.00      3S   
ATOM   1501 HD23 LEU   167      12.424  -9.525  32.212  1.00  0.00      3S   
ATOM   1502 C    LEU   167      13.938 -14.787  32.257  1.00  1.00      3S   
ATOM   1503 O    LEU   167      15.020 -15.352  32.085  1.00  1.00      3S   
ATOM   1504 N    PRO   168      12.789 -15.429  32.025  1.00  1.00      3S   
ATOM   1505 CD   PRO   168      11.458 -14.936  32.389  1.00  1.00      3S   
ATOM   1506 HD1  PRO   168      11.051 -14.339  31.544  1.00  0.00      3S   
ATOM   1507 HD2  PRO   168      11.466 -14.329  33.320  1.00  0.00      3S   
ATOM   1508 CA   PRO   168      12.747 -16.804  31.556  1.00  1.00      3S   
ATOM   1509 HA   PRO   168      13.402 -17.409  32.165  1.00  0.00      3S   
ATOM   1510 CB   PRO   168      11.266 -17.219  31.674  1.00  1.00      3S   
ATOM   1511 HB1  PRO   168      11.163 -18.245  32.081  1.00  0.00      3S   
ATOM   1512 HB2  PRO   168      10.743 -17.171  30.697  1.00  0.00      3S   
ATOM   1513 CG   PRO   168      10.632 -16.195  32.617  1.00  1.00      3S   
ATOM   1514 HG1  PRO   168       9.558 -16.034  32.397  1.00  0.00      3S   
ATOM   1515 HG2  PRO   168      10.757 -16.526  33.671  1.00  0.00      3S   
ATOM   1516 C    PRO   168      13.206 -16.894  30.125  1.00  1.00      3S   
ATOM   1517 O    PRO   168      13.435 -15.873  29.476  1.00  1.00      3S   
ATOM   1518 N    LYS   169      13.330 -18.130  29.611  1.00  1.00      3S   
ATOM   1519 HN   LYS   169      13.158 -18.940  30.167  1.00  0.00      3S   
ATOM   1520 CA   LYS   169      13.751 -18.376  28.258  1.00  1.00      3S   
ATOM   1521 HA   LYS   169      14.676 -17.839  28.093  1.00  0.00      3S   
ATOM   1522 CB   LYS   169      13.967 -19.881  28.006  1.00  1.00      3S   
ATOM   1523 HB1  LYS   169      14.324 -20.040  26.965  1.00  0.00      3S   
ATOM   1524 HB2  LYS   169      12.996 -20.411  28.130  1.00  0.00      3S   
ATOM   1525 CG   LYS   169      14.977 -20.522  28.969  1.00  1.00      3S   
ATOM   1526 HG1  LYS   169      14.909 -21.628  28.864  1.00  0.00      3S   
ATOM   1527 HG2  LYS   169      14.722 -20.275  30.023  1.00  0.00      3S   
ATOM   1528 CD   LYS   169      16.421 -20.093  28.686  1.00  1.00      3S   
ATOM   1529 HD1  LYS   169      16.519 -18.999  28.863  1.00  0.00      3S   
ATOM   1530 HD2  LYS   169      16.642 -20.293  27.613  1.00  0.00      3S   
ATOM   1531 CE   LYS   169      17.417 -20.850  29.567  1.00  1.00      3S   
ATOM   1532 HE1  LYS   169      17.310 -21.944  29.407  1.00  0.00      3S   
ATOM   1533 HE2  LYS   169      17.235 -20.612  30.637  1.00  0.00      3S   
ATOM   1534 NZ   LYS   169      18.811 -20.476  29.244  1.00  1.00      3S   
ATOM   1535 HZ1  LYS   169      18.944 -19.456  29.397  1.00  0.00      3S   
ATOM   1536 HZ2  LYS   169      19.011 -20.706  28.249  1.00  0.00      3S   
ATOM   1537 HZ3  LYS   169      19.460 -21.007  29.859  1.00  0.00      3S   
ATOM   1538 C    LYS   169      12.712 -17.863  27.293  1.00  1.00      3S   
ATOM   1539 O    LYS   169      11.520 -18.125  27.447  1.00  1.00      3S   
ATOM   1540 N    GLY   170      13.159 -17.072  26.292  1.00  1.00      3S   
ATOM   1541 HN   GLY   170      14.131 -16.881  26.177  1.00  0.00      3S   
ATOM   1542 CA   GLY   170      12.277 -16.507  25.302  1.00  1.00      3S   
ATOM   1543 HA1  GLY   170      11.440 -17.175  25.175  1.00  0.00      3S   
ATOM   1544 HA2  GLY   170      12.852 -16.389  24.396  1.00  0.00      3S   
ATOM   1545 C    GLY   170      11.723 -15.161  25.681  1.00  1.00      3S   
ATOM   1546 O    GLY   170      10.742 -14.719  25.087  1.00  1.00      3S   
ATOM   1547 N    PHE   171      12.327 -14.469  26.674  1.00  1.00      3S   
ATOM   1548 HN   PHE   171      13.107 -14.844  27.171  1.00  0.00      3S   
ATOM   1549 CA   PHE   171      11.867 -13.166  27.107  1.00  1.00      3S   
ATOM   1550 HA   PHE   171      11.136 -12.775  26.411  1.00  0.00      3S   
ATOM   1551 CB   PHE   171      11.293 -13.172  28.538  1.00  1.00      3S   
ATOM   1552 HB1  PHE   171      11.127 -12.137  28.906  1.00  0.00      3S   
ATOM   1553 HB2  PHE   171      11.990 -13.698  29.225  1.00  0.00      3S   
ATOM   1554 CG   PHE   171       9.973 -13.880  28.573  1.00  1.00      3S   
ATOM   1555 CD1  PHE   171       9.907 -15.243  28.895  1.00  1.00      3S   
ATOM   1556 HD1  PHE   171      10.816 -15.787  29.086  1.00  0.00      3S   
ATOM   1557 CE1  PHE   171       8.677 -15.897  28.986  1.00  1.00      3S   
ATOM   1558 HE1  PHE   171       8.637 -16.942  29.253  1.00  0.00      3S   
ATOM   1559 CZ   PHE   171       7.500 -15.187  28.742  1.00  1.00      3S   
ATOM   1560 HZ   PHE   171       6.553 -15.684  28.861  1.00  0.00      3S   
ATOM   1561 CD2  PHE   171       8.783 -13.183  28.309  1.00  1.00      3S   
ATOM   1562 HD2  PHE   171       8.826 -12.134  28.066  1.00  0.00      3S   
ATOM   1563 CE2  PHE   171       7.547 -13.833  28.387  1.00  1.00      3S   
ATOM   1564 HE2  PHE   171       6.633 -13.288  28.199  1.00  0.00      3S   
ATOM   1565 C    PHE   171      13.037 -12.227  27.101  1.00  1.00      3S   
ATOM   1566 O    PHE   171      14.145 -12.588  27.498  1.00  1.00      3S   
ATOM   1567 N    TYR   172      12.806 -10.987  26.613  1.00  1.00      3S   
ATOM   1568 HN   TYR   172      11.897 -10.693  26.327  1.00  0.00      3S   
ATOM   1569 CA   TYR   172      13.867 -10.040  26.372  1.00  1.00      3S   
ATOM   1570 HA   TYR   172      14.716 -10.275  27.000  1.00  0.00      3S   
ATOM   1571 CB   TYR   172      14.304  -9.982  24.879  1.00  1.00      3S   
ATOM   1572 HB1  TYR   172      15.174  -9.302  24.761  1.00  0.00      3S   
ATOM   1573 HB2  TYR   172      13.469  -9.615  24.247  1.00  0.00      3S   
ATOM   1574 CG   TYR   172      14.700 -11.347  24.360  1.00  1.00      3S   
ATOM   1575 CD1  TYR   172      13.725 -12.244  23.881  1.00  1.00      3S   
ATOM   1576 HD1  TYR   172      12.683 -11.957  23.883  1.00  0.00      3S   
ATOM   1577 CE1  TYR   172      14.089 -13.521  23.440  1.00  1.00      3S   
ATOM   1578 HE1  TYR   172      13.345 -14.211  23.079  1.00  0.00      3S   
ATOM   1579 CZ   TYR   172      15.434 -13.892  23.398  1.00  1.00      3S   
ATOM   1580 OH   TYR   172      15.792 -15.146  22.863  1.00  1.00      3S   
ATOM   1581 HH   TYR   172      16.749 -15.173  22.798  1.00  0.00      3S   
ATOM   1582 CD2  TYR   172      16.048 -11.746  24.341  1.00  1.00      3S   
ATOM   1583 HD2  TYR   172      16.812 -11.072  24.696  1.00  0.00      3S   
ATOM   1584 CE2  TYR   172      16.416 -13.008  23.854  1.00  1.00      3S   
ATOM   1585 HE2  TYR   172      17.457 -13.293  23.826  1.00  0.00      3S   
ATOM   1586 C    TYR   172      13.347  -8.694  26.800  1.00  1.00      3S   
ATOM   1587 O    TYR   172      12.179  -8.374  26.592  1.00  1.00      3S   
ATOM   1588 N    ALA   173      14.219  -7.894  27.442  1.00  1.00      3S   
ATOM   1589 HN   ALA   173      15.164  -8.162  27.602  1.00  0.00      3S   
ATOM   1590 CA   ALA   173      13.934  -6.565  27.899  1.00  1.00      3S   
ATOM   1591 HA   ALA   173      13.176  -6.107  27.274  1.00  0.00      3S   
ATOM   1592 CB   ALA   173      13.489  -6.565  29.376  1.00  1.00      3S   
ATOM   1593 HB1  ALA   173      14.318  -6.943  30.011  1.00  0.00      3S   
ATOM   1594 HB2  ALA   173      12.615  -7.238  29.507  1.00  0.00      3S   
ATOM   1595 HB3  ALA   173      13.207  -5.546  29.715  1.00  0.00      3S   
ATOM   1596 C    ALA   173      15.305  -5.873  27.729  1.00  1.00      3S   
ATOM   1597 OT1  ALA   173      15.869  -5.347  28.721  1.00  1.00      3S   
ATOM   1598 OT2  ALA   173      15.861  -5.945  26.601  1.00  0.00      3S   
TER 
ATOM   1599 N    ASN    48       3.137   2.333   5.642  1.00  1.00      4S   
ATOM   1600 HT1  ASN    48       3.541   1.669   6.326  1.00  0.00      4S   
ATOM   1601 HT2  ASN    48       3.812   2.496   4.869  1.00  0.00      4S   
ATOM   1602 HT3  ASN    48       2.336   1.859   5.164  1.00  0.00      4S   
ATOM   1603 CA   ASN    48       2.617   3.631   5.947  1.00  1.00      4S   
ATOM   1604 HA   ASN    48       3.449   4.166   6.376  1.00  0.00      4S   
ATOM   1605 CB   ASN    48       1.992   4.358   4.673  1.00  1.00      4S   
ATOM   1606 HB1  ASN    48       2.514   5.339   4.629  1.00  0.00      4S   
ATOM   1607 HB2  ASN    48       0.945   4.650   4.913  1.00  0.00      4S   
ATOM   1608 CG   ASN    48       2.043   3.631   3.263  1.00  0.00      4S   
ATOM   1609 OD1  ASN    48       1.656   4.047   2.184  1.00  0.00      4S   
ATOM   1610 ND2  ASN    48       2.566   2.395   3.155  1.00  0.00      4S   
ATOM   1611 HD21 ASN    48       1.996   1.640   3.477  1.00  0.00      4S   
ATOM   1612 HD22 ASN    48       3.567   2.347   3.185  1.00  0.00      4S   
ATOM   1613 C    ASN    48       1.603   3.350   6.974  1.00  1.00      4S   
ATOM   1614 O    ASN    48       0.562   2.759   6.679  1.00  1.00      4S   
ATOM   1615 N    THR    49       1.952   3.728   8.221  1.00  1.00      4S   
ATOM   1616 HN   THR    49       2.830   4.178   8.365  1.00  0.00      4S   
ATOM   1617 CA   THR    49       1.092   3.666   9.377  1.00  1.00      4S   
ATOM   1618 HA   THR    49       1.644   4.178  10.154  1.00  0.00      4S   
ATOM   1619 CB   THR    49      -0.225   4.399   9.162  1.00  1.00      4S   
ATOM   1620 HB   THR    49      -0.852   3.844   8.430  1.00  0.00      4S   
ATOM   1621 OG1  THR    49       0.023   5.702   8.645  1.00  1.00      4S   
ATOM   1622 HG1  THR    49      -0.838   6.097   8.493  1.00  0.00      4S   
ATOM   1623 CG2  THR    49      -0.992   4.548  10.483  1.00  1.00      4S   
ATOM   1624 HG21 THR    49      -0.394   5.132  11.214  1.00  0.00      4S   
ATOM   1625 HG22 THR    49      -1.216   3.552  10.914  1.00  0.00      4S   
ATOM   1626 HG23 THR    49      -1.955   5.070  10.303  1.00  0.00      4S   
ATOM   1627 C    THR    49       0.892   2.247   9.872  1.00  1.00      4S   
ATOM   1628 O    THR    49       0.755   2.006  11.063  1.00  1.00      4S   
ATOM   1629 N    ALA    50       0.914   1.231   8.989  1.00  1.00      4S   
ATOM   1630 HN   ALA    50       0.985   1.417   8.011  1.00  0.00      4S   
ATOM   1631 CA   ALA    50       0.768  -0.150   9.366  1.00  1.00      4S   
ATOM   1632 HA   ALA    50      -0.048  -0.220  10.071  1.00  0.00      4S   
ATOM   1633 CB   ALA    50       0.441  -1.009   8.130  1.00  1.00      4S   
ATOM   1634 HB1  ALA    50       1.240  -0.926   7.364  1.00  0.00      4S   
ATOM   1635 HB2  ALA    50      -0.512  -0.663   7.674  1.00  0.00      4S   
ATOM   1636 HB3  ALA    50       0.321  -2.077   8.413  1.00  0.00      4S   
ATOM   1637 C    ALA    50       2.017  -0.697  10.032  1.00  1.00      4S   
ATOM   1638 O    ALA    50       2.051  -1.856  10.430  1.00  1.00      4S   
ATOM   1639 N    SER    51       3.075   0.131  10.184  1.00  1.00      4S   
ATOM   1640 HN   SER    51       3.006   1.085   9.904  1.00  0.00      4S   
ATOM   1641 CA   SER    51       4.334  -0.249  10.780  1.00  1.00      4S   
ATOM   1642 HA   SER    51       4.493  -1.308  10.629  1.00  0.00      4S   
ATOM   1643 CB   SER    51       5.498   0.561  10.141  1.00  1.00      4S   
ATOM   1644 HB1  SER    51       5.176   1.615  10.012  1.00  0.00      4S   
ATOM   1645 HB2  SER    51       5.719   0.136   9.143  1.00  0.00      4S   
ATOM   1646 OG   SER    51       6.713   0.569  10.884  1.00  1.00      4S   
ATOM   1647 HG1  SER    51       7.231  -0.181  10.567  1.00  0.00      4S   
ATOM   1648 C    SER    51       4.293   0.015  12.256  1.00  1.00      4S   
ATOM   1649 O    SER    51       3.616   0.924  12.725  1.00  1.00      4S   
ATOM   1650 N    TRP    52       5.090  -0.767  13.016  1.00  1.00      4S   
ATOM   1651 HN   TRP    52       5.651  -1.490  12.608  1.00  0.00      4S   
ATOM   1652 CA   TRP    52       5.241  -0.596  14.435  1.00  1.00      4S   
ATOM   1653 HA   TRP    52       4.257  -0.493  14.858  1.00  0.00      4S   
ATOM   1654 CB   TRP    52       5.951  -1.801  15.087  1.00  1.00      4S   
ATOM   1655 HB1  TRP    52       6.339  -1.531  16.092  1.00  0.00      4S   
ATOM   1656 HB2  TRP    52       6.812  -2.098  14.447  1.00  0.00      4S   
ATOM   1657 CG   TRP    52       5.042  -2.999  15.259  1.00  1.00      4S   
ATOM   1658 CD1  TRP    52       4.982  -4.118  14.484  1.00  1.00      4S   
ATOM   1659 HD1  TRP    52       5.590  -4.301  13.611  1.00  0.00      4S   
ATOM   1660 NE1  TRP    52       4.039  -4.985  14.974  1.00  1.00      4S   
ATOM   1661 HE1  TRP    52       3.800  -5.847  14.577  1.00  0.00      4S   
ATOM   1662 CE2  TRP    52       3.445  -4.428  16.073  1.00  1.00      4S   
ATOM   1663 CD2  TRP    52       4.052  -3.173  16.296  1.00  1.00      4S   
ATOM   1664 CE3  TRP    52       3.654  -2.367  17.361  1.00  1.00      4S   
ATOM   1665 HE3  TRP    52       4.093  -1.401  17.553  1.00  0.00      4S   
ATOM   1666 CZ3  TRP    52       2.639  -2.851  18.202  1.00  1.00      4S   
ATOM   1667 HZ3  TRP    52       2.315  -2.256  19.041  1.00  0.00      4S   
ATOM   1668 CZ2  TRP    52       2.437  -4.902  16.901  1.00  1.00      4S   
ATOM   1669 HZ2  TRP    52       1.966  -5.859  16.733  1.00  0.00      4S   
ATOM   1670 CH2  TRP    52       2.039  -4.099  17.975  1.00  1.00      4S   
ATOM   1671 HH2  TRP    52       1.263  -4.453  18.637  1.00  0.00      4S   
ATOM   1672 C    TRP    52       5.991   0.657  14.787  1.00  1.00      4S   
ATOM   1673 O    TRP    52       5.756   1.213  15.854  1.00  1.00      4S   
ATOM   1674 N    PHE    53       6.899   1.136  13.913  1.00  1.00      4S   
ATOM   1675 HN   PHE    53       7.038   0.725  13.014  1.00  0.00      4S   
ATOM   1676 CA   PHE    53       7.748   2.254  14.233  1.00  1.00      4S   
ATOM   1677 HA   PHE    53       7.657   2.487  15.280  1.00  0.00      4S   
ATOM   1678 CB   PHE    53       9.234   1.986  13.906  1.00  1.00      4S   
ATOM   1679 HB1  PHE    53       9.860   2.873  14.136  1.00  0.00      4S   
ATOM   1680 HB2  PHE    53       9.353   1.721  12.834  1.00  0.00      4S   
ATOM   1681 CG   PHE    53       9.748   0.846  14.731  1.00  1.00      4S   
ATOM   1682 CD1  PHE    53       9.697  -0.466  14.233  1.00  1.00      4S   
ATOM   1683 HD1  PHE    53       9.267  -0.652  13.261  1.00  0.00      4S   
ATOM   1684 CE1  PHE    53      10.192  -1.532  14.987  1.00  1.00      4S   
ATOM   1685 HE1  PHE    53      10.161  -2.536  14.595  1.00  0.00      4S   
ATOM   1686 CZ   PHE    53      10.733  -1.292  16.252  1.00  1.00      4S   
ATOM   1687 HZ   PHE    53      11.107  -2.119  16.821  1.00  0.00      4S   
ATOM   1688 CD2  PHE    53      10.296   1.075  16.005  1.00  1.00      4S   
ATOM   1689 HD2  PHE    53      10.340   2.080  16.398  1.00  0.00      4S   
ATOM   1690 CE2  PHE    53      10.788   0.009  16.766  1.00  1.00      4S   
ATOM   1691 HE2  PHE    53      11.216   0.191  17.740  1.00  0.00      4S   
ATOM   1692 C    PHE    53       7.308   3.461  13.462  1.00  1.00      4S   
ATOM   1693 O    PHE    53       6.605   3.372  12.457  1.00  1.00      4S   
ATOM   1694 N    THR    54       7.753   4.653  13.918  1.00  1.00      4S   
ATOM   1695 HN   THR    54       8.241   4.729  14.788  1.00  0.00      4S   
ATOM   1696 CA   THR    54       7.581   5.888  13.194  1.00  1.00      4S   
ATOM   1697 HA   THR    54       6.555   5.938  12.858  1.00  0.00      4S   
ATOM   1698 CB   THR    54       7.891   7.125  14.023  1.00  1.00      4S   
ATOM   1699 HB   THR    54       7.801   8.050  13.413  1.00  0.00      4S   
ATOM   1700 OG1  THR    54       9.209   7.076  14.549  1.00  1.00      4S   
ATOM   1701 HG1  THR    54       9.795   6.994  13.790  1.00  0.00      4S   
ATOM   1702 CG2  THR    54       6.889   7.219  15.189  1.00  1.00      4S   
ATOM   1703 HG21 THR    54       6.944   6.322  15.840  1.00  0.00      4S   
ATOM   1704 HG22 THR    54       5.855   7.310  14.800  1.00  0.00      4S   
ATOM   1705 HG23 THR    54       7.116   8.112  15.811  1.00  0.00      4S   
ATOM   1706 C    THR    54       8.474   5.878  11.978  1.00  1.00      4S   
ATOM   1707 O    THR    54       9.345   5.024  11.820  1.00  1.00      4S   
ATOM   1708 N    ALA    55       8.264   6.846  11.074  1.00  1.00      4S   
ATOM   1709 HN   ALA    55       7.573   7.552  11.205  1.00  0.00      4S   
ATOM   1710 CA   ALA    55       8.983   6.874   9.837  1.00  1.00      4S   
ATOM   1711 HA   ALA    55       9.145   5.858   9.500  1.00  0.00      4S   
ATOM   1712 CB   ALA    55       8.189   7.615   8.762  1.00  1.00      4S   
ATOM   1713 HB1  ALA    55       8.251   8.713   8.901  1.00  0.00      4S   
ATOM   1714 HB2  ALA    55       7.121   7.342   8.838  1.00  0.00      4S   
ATOM   1715 HB3  ALA    55       8.552   7.340   7.750  1.00  0.00      4S   
ATOM   1716 C    ALA    55      10.304   7.573   9.992  1.00  1.00      4S   
ATOM   1717 O    ALA    55      10.464   8.476  10.812  1.00  1.00      4S   
ATOM   1718 N    LEU    56      11.277   7.167   9.157  1.00  1.00      4S   
ATOM   1719 HN   LEU    56      11.157   6.340   8.605  1.00  0.00      4S   
ATOM   1720 CA   LEU    56      12.488   7.897   8.910  1.00  1.00      4S   
ATOM   1721 HA   LEU    56      12.717   8.514   9.764  1.00  0.00      4S   
ATOM   1722 CB   LEU    56      13.652   6.952   8.549  1.00  1.00      4S   
ATOM   1723 HB1  LEU    56      14.345   7.453   7.836  1.00  0.00      4S   
ATOM   1724 HB2  LEU    56      13.235   6.052   8.043  1.00  0.00      4S   
ATOM   1725 CG   LEU    56      14.521   6.482   9.729  1.00  1.00      4S   
ATOM   1726 HG   LEU    56      13.908   5.858  10.416  1.00  0.00      4S   
ATOM   1727 CD1  LEU    56      15.663   5.618   9.174  1.00  1.00      4S   
ATOM   1728 HD11 LEU    56      16.277   6.219   8.469  1.00  0.00      4S   
ATOM   1729 HD12 LEU    56      15.251   4.749   8.620  1.00  0.00      4S   
ATOM   1730 HD13 LEU    56      16.311   5.252   9.995  1.00  0.00      4S   
ATOM   1731 CD2  LEU    56      15.080   7.668  10.530  1.00  1.00      4S   
ATOM   1732 HD21 LEU    56      14.270   8.170  11.099  1.00  0.00      4S   
ATOM   1733 HD22 LEU    56      15.541   8.403   9.837  1.00  0.00      4S   
ATOM   1734 HD23 LEU    56      15.846   7.320  11.253  1.00  0.00      4S   
ATOM   1735 C    LEU    56      12.253   8.802   7.729  1.00  1.00      4S   
ATOM   1736 O    LEU    56      12.046   8.346   6.611  1.00  1.00      4S   
ATOM   1737 N    THR    57      12.291  10.130   7.950  1.00  1.00      4S   
ATOM   1738 HN   THR    57      12.508  10.499   8.849  1.00  0.00      4S   
ATOM   1739 CA   THR    57      11.973  11.098   6.923  1.00  1.00      4S   
ATOM   1740 HA   THR    57      11.290  10.650   6.212  1.00  0.00      4S   
ATOM   1741 CB   THR    57      11.305  12.327   7.503  1.00  1.00      4S   
ATOM   1742 HB   THR    57      11.972  12.815   8.250  1.00  0.00      4S   
ATOM   1743 OG1  THR    57      10.103  11.935   8.141  1.00  1.00      4S   
ATOM   1744 HG1  THR    57      10.367  11.619   9.015  1.00  0.00      4S   
ATOM   1745 CG2  THR    57      10.913  13.336   6.419  1.00  1.00      4S   
ATOM   1746 HG21 THR    57      10.328  12.829   5.621  1.00  0.00      4S   
ATOM   1747 HG22 THR    57      11.814  13.808   5.977  1.00  0.00      4S   
ATOM   1748 HG23 THR    57      10.283  14.136   6.860  1.00  0.00      4S   
ATOM   1749 C    THR    57      13.236  11.476   6.199  1.00  1.00      4S   
ATOM   1750 O    THR    57      14.258  11.772   6.813  1.00  1.00      4S   
ATOM   1751 N    GLN    58      13.177  11.458   4.851  1.00  1.00      4S   
ATOM   1752 HN   GLN    58      12.332  11.200   4.378  1.00  0.00      4S   
ATOM   1753 CA   GLN    58      14.275  11.775   3.983  1.00  1.00      4S   
ATOM   1754 HA   GLN    58      15.206  11.592   4.500  1.00  0.00      4S   
ATOM   1755 CB   GLN    58      14.236  10.915   2.701  1.00  1.00      4S   
ATOM   1756 HB1  GLN    58      13.258  11.049   2.198  1.00  0.00      4S   
ATOM   1757 HB2  GLN    58      14.295   9.847   2.999  1.00  0.00      4S   
ATOM   1758 CG   GLN    58      15.370  11.226   1.716  1.00  1.00      4S   
ATOM   1759 HG1  GLN    58      16.353  11.018   2.190  1.00  0.00      4S   
ATOM   1760 HG2  GLN    58      15.327  12.298   1.444  1.00  0.00      4S   
ATOM   1761 CD   GLN    58      15.225  10.383   0.447  1.00  1.00      4S   
ATOM   1762 OE1  GLN    58      14.517   9.372   0.409  1.00  1.00      4S   
ATOM   1763 NE2  GLN    58      15.940  10.829  -0.624  1.00  1.00      4S   
ATOM   1764 HE21 GLN    58      16.062  10.238  -1.421  1.00  0.00      4S   
ATOM   1765 HE22 GLN    58      16.460  11.680  -0.545  1.00  0.00      4S   
ATOM   1766 C    GLN    58      14.194  13.233   3.621  1.00  1.00      4S   
ATOM   1767 O    GLN    58      13.426  13.647   2.757  1.00  1.00      4S   
ATOM   1768 N    HSD    59      15.014  14.065   4.285  1.00  1.00      4S   
ATOM   1769 HN   HSD    59      15.595  13.731   5.027  1.00  0.00      4S   
ATOM   1770 CA   HSD    59      15.050  15.487   4.045  1.00  1.00      4S   
ATOM   1771 HA   HSD    59      14.058  15.822   3.772  1.00  0.00      4S   
ATOM   1772 CB   HSD    59      15.499  16.256   5.304  1.00  1.00      4S   
ATOM   1773 HB1  HSD    59      15.484  17.349   5.106  1.00  0.00      4S   
ATOM   1774 HB2  HSD    59      16.532  15.958   5.582  1.00  0.00      4S   
ATOM   1775 ND1  HSD    59      14.793  14.899   7.320  1.00  1.00      4S   
ATOM   1776 HD1  HSD    59      15.502  14.196   7.230  1.00  0.00      4S   
ATOM   1777 CG   HSD    59      14.620  15.980   6.481  1.00  1.00      4S   
ATOM   1778 CE1  HSD    59      13.788  14.935   8.218  1.00  1.00      4S   
ATOM   1779 HE1  HSD    59      13.694  14.207   9.023  1.00  0.00      4S   
ATOM   1780 NE2  HSD    59      12.975  15.949   8.006  1.00  1.00      4S   
ATOM   1781 CD2  HSD    59      13.506  16.620   6.922  1.00  1.00      4S   
ATOM   1782 HD2  HSD    59      13.031  17.527   6.567  1.00  0.00      4S   
ATOM   1783 C    HSD    59      15.977  15.846   2.910  1.00  1.00      4S   
ATOM   1784 O    HSD    59      15.939  16.977   2.429  1.00  1.00      4S   
ATOM   1785 N    GLY    60      16.824  14.896   2.444  1.00  1.00      4S   
ATOM   1786 HN   GLY    60      16.829  13.975   2.828  1.00  0.00      4S   
ATOM   1787 CA   GLY    60      17.786  15.156   1.394  1.00  1.00      4S   
ATOM   1788 HA1  GLY    60      18.744  14.815   1.750  1.00  0.00      4S   
ATOM   1789 HA2  GLY    60      17.786  16.206   1.138  1.00  0.00      4S   
ATOM   1790 C    GLY    60      17.451  14.387   0.155  1.00  1.00      4S   
ATOM   1791 O    GLY    60      16.370  13.825   0.007  1.00  1.00      4S   
ATOM   1792 N    LYS    61      18.402  14.365  -0.798  1.00  1.00      4S   
ATOM   1793 HN   LYS    61      19.256  14.867  -0.686  1.00  0.00      4S   
ATOM   1794 CA   LYS    61      18.227  13.711  -2.070  1.00  1.00      4S   
ATOM   1795 HA   LYS    61      17.185  13.751  -2.359  1.00  0.00      4S   
ATOM   1796 CB   LYS    61      19.077  14.382  -3.156  1.00  1.00      4S   
ATOM   1797 HB1  LYS    61      18.961  13.800  -4.093  1.00  0.00      4S   
ATOM   1798 HB2  LYS    61      20.152  14.358  -2.870  1.00  0.00      4S   
ATOM   1799 CG   LYS    61      18.682  15.841  -3.424  1.00  1.00      4S   
ATOM   1800 HG1  LYS    61      18.904  16.446  -2.516  1.00  0.00      4S   
ATOM   1801 HG2  LYS    61      17.587  15.911  -3.614  1.00  0.00      4S   
ATOM   1802 CD   LYS    61      19.436  16.441  -4.619  1.00  1.00      4S   
ATOM   1803 HD1  LYS    61      20.489  16.085  -4.613  1.00  0.00      4S   
ATOM   1804 HD2  LYS    61      19.457  17.548  -4.490  1.00  0.00      4S   
ATOM   1805 CE   LYS    61      18.768  16.142  -5.972  1.00  1.00      4S   
ATOM   1806 HE1  LYS    61      19.223  16.771  -6.764  1.00  0.00      4S   
ATOM   1807 HE2  LYS    61      17.680  16.360  -5.905  1.00  0.00      4S   
ATOM   1808 NZ   LYS    61      18.920  14.725  -6.387  1.00  1.00      4S   
ATOM   1809 HZ1  LYS    61      18.490  14.109  -5.667  1.00  0.00      4S   
ATOM   1810 HZ2  LYS    61      19.929  14.492  -6.473  1.00  0.00      4S   
ATOM   1811 HZ3  LYS    61      18.444  14.571  -7.298  1.00  0.00      4S   
ATOM   1812 C    LYS    61      18.623  12.264  -2.023  1.00  1.00      4S   
ATOM   1813 O    LYS    61      18.085  11.456  -2.777  1.00  1.00      4S   
ATOM   1814 N    GLU    62      19.576  11.893  -1.140  1.00  1.00      4S   
ATOM   1815 HN   GLU    62      20.002  12.540  -0.514  1.00  0.00      4S   
ATOM   1816 CA   GLU    62      20.069  10.543  -1.070  1.00  1.00      4S   
ATOM   1817 HA   GLU    62      20.305  10.212  -2.072  1.00  0.00      4S   
ATOM   1818 CB   GLU    62      21.337  10.429  -0.208  1.00  1.00      4S   
ATOM   1819 HB1  GLU    62      21.661   9.365  -0.178  1.00  0.00      4S   
ATOM   1820 HB2  GLU    62      21.102  10.744   0.835  1.00  0.00      4S   
ATOM   1821 CG   GLU    62      22.459  11.293  -0.818  1.00  1.00      4S   
ATOM   1822 HG1  GLU    62      22.221  12.369  -0.658  1.00  0.00      4S   
ATOM   1823 HG2  GLU    62      22.533  11.093  -1.906  1.00  0.00      4S   
ATOM   1824 CD   GLU    62      23.852  10.943  -0.311  1.00  1.00      4S   
ATOM   1825 OE1  GLU    62      24.032   9.810   0.213  1.00  1.00      4S   
ATOM   1826 OE2  GLU    62      24.751  11.822  -0.414  1.00  1.00      4S   
ATOM   1827 C    GLU    62      19.035   9.641  -0.484  1.00  1.00      4S   
ATOM   1828 O    GLU    62      18.435   9.954   0.540  1.00  1.00      4S   
ATOM   1829 N    ASP    63      18.813   8.478  -1.128  1.00  1.00      4S   
ATOM   1830 HN   ASP    63      19.266   8.266  -1.990  1.00  0.00      4S   
ATOM   1831 CA   ASP    63      17.894   7.480  -0.652  1.00  1.00      4S   
ATOM   1832 HA   ASP    63      16.947   7.957  -0.438  1.00  0.00      4S   
ATOM   1833 CB   ASP    63      17.680   6.332  -1.673  1.00  1.00      4S   
ATOM   1834 HB1  ASP    63      17.045   5.535  -1.230  1.00  0.00      4S   
ATOM   1835 HB2  ASP    63      18.664   5.891  -1.944  1.00  0.00      4S   
ATOM   1836 CG   ASP    63      16.993   6.823  -2.952  1.00  1.00      4S   
ATOM   1837 OD1  ASP    63      16.681   8.037  -3.062  1.00  1.00      4S   
ATOM   1838 OD2  ASP    63      16.761   5.963  -3.842  1.00  1.00      4S   
ATOM   1839 C    ASP    63      18.435   6.896   0.625  1.00  1.00      4S   
ATOM   1840 O    ASP    63      19.598   7.084   0.989  1.00  1.00      4S   
ATOM   1841 N    LEU    64      17.575   6.176   1.362  1.00  1.00      4S   
ATOM   1842 HN   LEU    64      16.626   6.044   1.088  1.00  0.00      4S   
ATOM   1843 CA   LEU    64      17.974   5.569   2.597  1.00  1.00      4S   
ATOM   1844 HA   LEU    64      18.584   6.269   3.143  1.00  0.00      4S   
ATOM   1845 CB   LEU    64      16.739   5.202   3.435  1.00  1.00      4S   
ATOM   1846 HB1  LEU    64      16.080   4.535   2.837  1.00  0.00      4S   
ATOM   1847 HB2  LEU    64      16.167   6.134   3.635  1.00  0.00      4S   
ATOM   1848 CG   LEU    64      17.032   4.540   4.791  1.00  1.00      4S   
ATOM   1849 HG   LEU    64      17.662   3.641   4.622  1.00  0.00      4S   
ATOM   1850 CD1  LEU    64      17.805   5.474   5.730  1.00  1.00      4S   
ATOM   1851 HD11 LEU    64      17.206   6.386   5.922  1.00  0.00      4S   
ATOM   1852 HD12 LEU    64      18.774   5.768   5.279  1.00  0.00      4S   
ATOM   1853 HD13 LEU    64      18.003   4.966   6.695  1.00  0.00      4S   
ATOM   1854 CD2  LEU    64      15.724   4.064   5.427  1.00  1.00      4S   
ATOM   1855 HD21 LEU    64      15.210   3.351   4.747  1.00  0.00      4S   
ATOM   1856 HD22 LEU    64      15.059   4.934   5.606  1.00  0.00      4S   
ATOM   1857 HD23 LEU    64      15.928   3.558   6.392  1.00  0.00      4S   
ATOM   1858 C    LEU    64      18.778   4.334   2.310  1.00  1.00      4S   
ATOM   1859 O    LEU    64      18.445   3.579   1.403  1.00  1.00      4S   
ATOM   1860 N    LYS    65      19.868   4.117   3.078  1.00  1.00      4S   
ATOM   1861 HN   LYS    65      20.192   4.791   3.737  1.00  0.00      4S   
ATOM   1862 CA   LYS    65      20.581   2.870   3.047  1.00  1.00      4S   
ATOM   1863 HA   LYS    65      19.865   2.063   3.040  1.00  0.00      4S   
ATOM   1864 CB   LYS    65      21.512   2.725   1.828  1.00  1.00      4S   
ATOM   1865 HB1  LYS    65      20.926   2.969   0.914  1.00  0.00      4S   
ATOM   1866 HB2  LYS    65      21.840   1.666   1.744  1.00  0.00      4S   
ATOM   1867 CG   LYS    65      22.747   3.630   1.856  1.00  1.00      4S   
ATOM   1868 HG1  LYS    65      23.329   3.449   2.788  1.00  0.00      4S   
ATOM   1869 HG2  LYS    65      22.421   4.693   1.851  1.00  0.00      4S   
ATOM   1870 CD   LYS    65      23.669   3.357   0.666  1.00  1.00      4S   
ATOM   1871 HD1  LYS    65      23.118   3.559  -0.278  1.00  0.00      4S   
ATOM   1872 HD2  LYS    65      23.938   2.275   0.676  1.00  0.00      4S   
ATOM   1873 CE   LYS    65      24.958   4.180   0.716  1.00  1.00      4S   
ATOM   1874 HE1  LYS    65      25.597   3.939  -0.159  1.00  0.00      4S   
ATOM   1875 HE2  LYS    65      25.512   3.959   1.654  1.00  0.00      4S   
ATOM   1876 NZ   LYS    65      24.671   5.635   0.689  1.00  1.00      4S   
ATOM   1877 HZ1  LYS    65      24.085   5.890   1.510  1.00  0.00      4S   
ATOM   1878 HZ2  LYS    65      24.160   5.876  -0.184  1.00  0.00      4S   
ATOM   1879 HZ3  LYS    65      25.565   6.165   0.725  1.00  0.00      4S   
ATOM   1880 C    LYS    65      21.375   2.755   4.311  1.00  1.00      4S   
ATOM   1881 O    LYS    65      21.653   3.752   4.978  1.00  1.00      4S   
ATOM   1882 N    PHE    66      21.767   1.513   4.665  1.00  1.00      4S   
ATOM   1883 HN   PHE    66      21.501   0.706   4.142  1.00  0.00      4S   
ATOM   1884 CA   PHE    66      22.580   1.275   5.830  1.00  1.00      4S   
ATOM   1885 HA   PHE    66      22.986   2.211   6.174  1.00  0.00      4S   
ATOM   1886 CB   PHE    66      21.785   0.598   6.968  1.00  1.00      4S   
ATOM   1887 HB1  PHE    66      22.460   0.273   7.787  1.00  0.00      4S   
ATOM   1888 HB2  PHE    66      21.233  -0.285   6.581  1.00  0.00      4S   
ATOM   1889 CG   PHE    66      20.794   1.561   7.555  1.00  1.00      4S   
ATOM   1890 CD1  PHE    66      21.204   2.500   8.515  1.00  1.00      4S   
ATOM   1891 HD1  PHE    66      22.239   2.543   8.822  1.00  0.00      4S   
ATOM   1892 CE1  PHE    66      20.274   3.367   9.096  1.00  1.00      4S   
ATOM   1893 HE1  PHE    66      20.600   4.070   9.845  1.00  0.00      4S   
ATOM   1894 CZ   PHE    66      18.925   3.308   8.725  1.00  1.00      4S   
ATOM   1895 HZ   PHE    66      18.208   3.978   9.173  1.00  0.00      4S   
ATOM   1896 CD2  PHE    66      19.441   1.517   7.181  1.00  1.00      4S   
ATOM   1897 HD2  PHE    66      19.115   0.797   6.447  1.00  0.00      4S   
ATOM   1898 CE2  PHE    66      18.507   2.376   7.768  1.00  1.00      4S   
ATOM   1899 HE2  PHE    66      17.467   2.319   7.485  1.00  0.00      4S   
ATOM   1900 C    PHE    66      23.717   0.361   5.450  1.00  1.00      4S   
ATOM   1901 O    PHE    66      23.551  -0.489   4.574  1.00  1.00      4S   
ATOM   1902 N    PRO    67      24.883   0.462   6.097  1.00  1.00      4S   
ATOM   1903 CD   PRO    67      25.366   1.671   6.769  1.00  1.00      4S   
ATOM   1904 HD1  PRO    67      25.006   1.674   7.821  1.00  0.00      4S   
ATOM   1905 HD2  PRO    67      25.033   2.593   6.243  1.00  0.00      4S   
ATOM   1906 CA   PRO    67      25.915  -0.556   6.008  1.00  1.00      4S   
ATOM   1907 HA   PRO    67      26.117  -0.777   4.971  1.00  0.00      4S   
ATOM   1908 CB   PRO    67      27.122   0.041   6.752  1.00  1.00      4S   
ATOM   1909 HB1  PRO    67      28.079  -0.229   6.263  1.00  0.00      4S   
ATOM   1910 HB2  PRO    67      27.148  -0.291   7.813  1.00  0.00      4S   
ATOM   1911 CG   PRO    67      26.886   1.553   6.715  1.00  1.00      4S   
ATOM   1912 HG1  PRO    67      27.380   2.077   7.557  1.00  0.00      4S   
ATOM   1913 HG2  PRO    67      27.254   1.961   5.748  1.00  0.00      4S   
ATOM   1914 C    PRO    67      25.436  -1.801   6.692  1.00  1.00      4S   
ATOM   1915 O    PRO    67      24.580  -1.712   7.573  1.00  1.00      4S   
ATOM   1916 N    ARG    68      25.972  -2.971   6.295  1.00  1.00      4S   
ATOM   1917 HN   ARG    68      26.664  -3.007   5.578  1.00  0.00      4S   
ATOM   1918 CA   ARG    68      25.537  -4.242   6.814  1.00  1.00      4S   
ATOM   1919 HA   ARG    68      24.484  -4.347   6.589  1.00  0.00      4S   
ATOM   1920 CB   ARG    68      26.308  -5.398   6.151  1.00  1.00      4S   
ATOM   1921 HB1  ARG    68      27.399  -5.246   6.311  1.00  0.00      4S   
ATOM   1922 HB2  ARG    68      26.123  -5.361   5.054  1.00  0.00      4S   
ATOM   1923 CG   ARG    68      25.914  -6.785   6.675  1.00  1.00      4S   
ATOM   1924 HG1  ARG    68      24.835  -6.966   6.478  1.00  0.00      4S   
ATOM   1925 HG2  ARG    68      26.068  -6.814   7.778  1.00  0.00      4S   
ATOM   1926 CD   ARG    68      26.763  -7.904   6.080  1.00  1.00      4S   
ATOM   1927 HD1  ARG    68      26.523  -8.869   6.576  1.00  0.00      4S   
ATOM   1928 HD2  ARG    68      27.845  -7.670   6.191  1.00  0.00      4S   
ATOM   1929 NE   ARG    68      26.449  -8.018   4.625  1.00  1.00      4S   
ATOM   1930 HE   ARG    68      25.851  -7.342   4.199  1.00  0.00      4S   
ATOM   1931 CZ   ARG    68      26.962  -9.021   3.863  1.00  1.00      4S   
ATOM   1932 NH1  ARG    68      26.645  -9.084   2.545  1.00  1.00      4S   
ATOM   1933 HH11 ARG    68      26.041  -8.394   2.151  1.00  0.00      4S   
ATOM   1934 HH12 ARG    68      27.017  -9.820   1.983  1.00  0.00      4S   
ATOM   1935 NH2  ARG    68      27.783  -9.958   4.405  1.00  1.00      4S   
ATOM   1936 HH21 ARG    68      28.011  -9.907   5.375  1.00  0.00      4S   
ATOM   1937 HH22 ARG    68      28.148 -10.690   3.834  1.00  0.00      4S   
ATOM   1938 C    ARG    68      25.726  -4.301   8.312  1.00  1.00      4S   
ATOM   1939 O    ARG    68      26.803  -4.000   8.824  1.00  1.00      4S   
ATOM   1940 N    GLY    69      24.641  -4.653   9.039  1.00  1.00      4S   
ATOM   1941 HN   GLY    69      23.780  -4.896   8.595  1.00  0.00      4S   
ATOM   1942 CA   GLY    69      24.669  -4.754  10.479  1.00  1.00      4S   
ATOM   1943 HA1  GLY    69      25.691  -4.754  10.826  1.00  0.00      4S   
ATOM   1944 HA2  GLY    69      24.159  -5.667  10.736  1.00  0.00      4S   
ATOM   1945 C    GLY    69      23.946  -3.625  11.157  1.00  1.00      4S   
ATOM   1946 O    GLY    69      23.740  -3.679  12.368  1.00  1.00      4S   
ATOM   1947 N    GLN    70      23.559  -2.565  10.410  1.00  1.00      4S   
ATOM   1948 HN   GLN    70      23.728  -2.527   9.426  1.00  0.00      4S   
ATOM   1949 CA   GLN    70      22.947  -1.387  10.978  1.00  1.00      4S   
ATOM   1950 HA   GLN    70      22.842  -1.496  12.048  1.00  0.00      4S   
ATOM   1951 CB   GLN    70      23.777  -0.114  10.680  1.00  1.00      4S   
ATOM   1952 HB1  GLN    70      23.258   0.765  11.109  1.00  0.00      4S   
ATOM   1953 HB2  GLN    70      23.844   0.034   9.580  1.00  0.00      4S   
ATOM   1954 CG   GLN    70      25.201  -0.192  11.267  1.00  1.00      4S   
ATOM   1955 HG1  GLN    70      25.703  -1.114  10.910  1.00  0.00      4S   
ATOM   1956 HG2  GLN    70      25.148  -0.212  12.376  1.00  0.00      4S   
ATOM   1957 CD   GLN    70      26.028   1.022  10.847  1.00  1.00      4S   
ATOM   1958 OE1  GLN    70      25.614   2.157  11.072  1.00  1.00      4S   
ATOM   1959 NE2  GLN    70      27.222   0.780  10.241  1.00  1.00      4S   
ATOM   1960 HE21 GLN    70      27.795   1.549   9.956  1.00  0.00      4S   
ATOM   1961 HE22 GLN    70      27.501  -0.163  10.071  1.00  0.00      4S   
ATOM   1962 C    GLN    70      21.569  -1.219  10.401  1.00  1.00      4S   
ATOM   1963 O    GLN    70      21.212  -1.853   9.409  1.00  1.00      4S   
ATOM   1964 N    GLY    71      20.757  -0.338  11.031  1.00  1.00      4S   
ATOM   1965 HN   GLY    71      21.032   0.102  11.886  1.00  0.00      4S   
ATOM   1966 CA   GLY    71      19.510   0.114  10.469  1.00  1.00      4S   
ATOM   1967 HA1  GLY    71      19.466  -0.141   9.422  1.00  0.00      4S   
ATOM   1968 HA2  GLY    71      19.460   1.180  10.633  1.00  0.00      4S   
ATOM   1969 C    GLY    71      18.321  -0.482  11.128  1.00  1.00      4S   
ATOM   1970 O    GLY    71      17.218  -0.003  10.923  1.00  1.00      4S   
ATOM   1971 N    VAL    72      18.467  -1.540  11.943  1.00  1.00      4S   
ATOM   1972 HN   VAL    72      19.356  -1.951  12.120  1.00  0.00      4S   
ATOM   1973 CA   VAL    72      17.328  -2.153  12.587  1.00  1.00      4S   
ATOM   1974 HA   VAL    72      16.544  -2.246  11.854  1.00  0.00      4S   
ATOM   1975 CB   VAL    72      17.643  -3.551  13.074  1.00  1.00      4S   
ATOM   1976 HB   VAL    72      18.558  -3.525  13.709  1.00  0.00      4S   
ATOM   1977 CG1  VAL    72      16.476  -4.120  13.898  1.00  1.00      4S   
ATOM   1978 HG11 VAL    72      15.518  -4.005  13.349  1.00  0.00      4S   
ATOM   1979 HG12 VAL    72      16.403  -3.609  14.880  1.00  0.00      4S   
ATOM   1980 HG13 VAL    72      16.646  -5.197  14.084  1.00  0.00      4S   
ATOM   1981 CG2  VAL    72      17.923  -4.447  11.854  1.00  1.00      4S   
ATOM   1982 HG21 VAL    72      18.784  -4.068  11.267  1.00  0.00      4S   
ATOM   1983 HG22 VAL    72      17.028  -4.500  11.199  1.00  0.00      4S   
ATOM   1984 HG23 VAL    72      18.164  -5.473  12.200  1.00  0.00      4S   
ATOM   1985 C    VAL    72      16.886  -1.271  13.744  1.00  1.00      4S   
ATOM   1986 O    VAL    72      17.733  -0.916  14.566  1.00  1.00      4S   
ATOM   1987 N    PRO    73      15.611  -0.875  13.865  1.00  1.00      4S   
ATOM   1988 CD   PRO    73      14.566  -1.053  12.855  1.00  1.00      4S   
ATOM   1989 HD1  PRO    73      14.060  -2.026  13.035  1.00  0.00      4S   
ATOM   1990 HD2  PRO    73      14.960  -1.013  11.817  1.00  0.00      4S   
ATOM   1991 CA   PRO    73      15.177   0.015  14.925  1.00  1.00      4S   
ATOM   1992 HA   PRO    73      15.823   0.878  14.946  1.00  0.00      4S   
ATOM   1993 CB   PRO    73      13.726   0.369  14.581  1.00  1.00      4S   
ATOM   1994 HB1  PRO    73      13.498   1.423  14.825  1.00  0.00      4S   
ATOM   1995 HB2  PRO    73      13.008  -0.294  15.107  1.00  0.00      4S   
ATOM   1996 CG   PRO    73      13.602   0.105  13.085  1.00  1.00      4S   
ATOM   1997 HG1  PRO    73      12.563  -0.141  12.794  1.00  0.00      4S   
ATOM   1998 HG2  PRO    73      13.947   0.997  12.522  1.00  0.00      4S   
ATOM   1999 C    PRO    73      15.235  -0.661  16.261  1.00  1.00      4S   
ATOM   2000 O    PRO    73      15.034  -1.872  16.343  1.00  1.00      4S   
ATOM   2001 N    ILE    74      15.506   0.125  17.320  1.00  1.00      4S   
ATOM   2002 HN   ILE    74      15.660   1.107  17.202  1.00  0.00      4S   
ATOM   2003 CA   ILE    74      15.662  -0.373  18.660  1.00  1.00      4S   
ATOM   2004 HA   ILE    74      16.360  -1.199  18.625  1.00  0.00      4S   
ATOM   2005 CB   ILE    74      16.209   0.692  19.602  1.00  1.00      4S   
ATOM   2006 HB   ILE    74      15.637   1.637  19.451  1.00  0.00      4S   
ATOM   2007 CG2  ILE    74      16.037   0.248  21.072  1.00  1.00      4S   
ATOM   2008 HG21 ILE    74      16.447  -0.775  21.206  1.00  0.00      4S   
ATOM   2009 HG22 ILE    74      14.965   0.255  21.357  1.00  0.00      4S   
ATOM   2010 HG23 ILE    74      16.557   0.936  21.764  1.00  0.00      4S   
ATOM   2011 CG1  ILE    74      17.689   0.986  19.267  1.00  1.00      4S   
ATOM   2012 HG11 ILE    74      17.768   1.318  18.209  1.00  0.00      4S   
ATOM   2013 HG12 ILE    74      18.279   0.050  19.378  1.00  0.00      4S   
ATOM   2014 CD   ILE    74      18.292   2.069  20.164  1.00  1.00      4S   
ATOM   2015 HD1  ILE    74      18.416   1.691  21.202  1.00  0.00      4S   
ATOM   2016 HD2  ILE    74      17.628   2.959  20.189  1.00  0.00      4S   
ATOM   2017 HD3  ILE    74      19.290   2.372  19.788  1.00  0.00      4S   
ATOM   2018 C    ILE    74      14.335  -0.889  19.155  1.00  1.00      4S   
ATOM   2019 O    ILE    74      13.345  -0.160  19.201  1.00  1.00      4S   
ATOM   2020 N    ASN    75      14.310  -2.186  19.528  1.00  1.00      4S   
ATOM   2021 HN   ASN    75      15.111  -2.771  19.426  1.00  0.00      4S   
ATOM   2022 CA   ASN    75      13.146  -2.804  20.095  1.00  1.00      4S   
ATOM   2023 HA   ASN    75      12.516  -2.046  20.541  1.00  0.00      4S   
ATOM   2024 CB   ASN    75      12.362  -3.602  19.034  1.00  1.00      4S   
ATOM   2025 HB1  ASN    75      12.939  -4.482  18.688  1.00  0.00      4S   
ATOM   2026 HB2  ASN    75      12.238  -2.941  18.158  1.00  0.00      4S   
ATOM   2027 CG   ASN    75      10.983  -4.028  19.558  1.00  1.00      4S   
ATOM   2028 OD1  ASN    75      10.670  -3.911  20.746  1.00  1.00      4S   
ATOM   2029 ND2  ASN    75      10.136  -4.543  18.626  1.00  1.00      4S   
ATOM   2030 HD21 ASN    75      10.447  -4.620  17.675  1.00  0.00      4S   
ATOM   2031 HD22 ASN    75       9.229  -4.862  18.890  1.00  0.00      4S   
ATOM   2032 C    ASN    75      13.657  -3.717  21.167  1.00  1.00      4S   
ATOM   2033 O    ASN    75      14.066  -4.844  20.908  1.00  1.00      4S   
ATOM   2034 N    THR    76      13.647  -3.245  22.425  1.00  1.00      4S   
ATOM   2035 HN   THR    76      13.278  -2.344  22.641  1.00  0.00      4S   
ATOM   2036 CA   THR    76      14.259  -3.943  23.534  1.00  1.00      4S   
ATOM   2037 HA   THR    76      15.278  -4.173  23.249  1.00  0.00      4S   
ATOM   2038 CB   THR    76      14.278  -3.080  24.786  1.00  1.00      4S   
ATOM   2039 HB   THR    76      14.720  -3.643  25.639  1.00  0.00      4S   
ATOM   2040 OG1  THR    76      12.971  -2.641  25.141  1.00  1.00      4S   
ATOM   2041 HG1  THR    76      12.718  -3.159  25.908  1.00  0.00      4S   
ATOM   2042 CG2  THR    76      15.142  -1.833  24.516  1.00  1.00      4S   
ATOM   2043 HG21 THR    76      14.728  -1.231  23.681  1.00  0.00      4S   
ATOM   2044 HG22 THR    76      16.182  -2.128  24.262  1.00  0.00      4S   
ATOM   2045 HG23 THR    76      15.167  -1.192  25.423  1.00  0.00      4S   
ATOM   2046 C    THR    76      13.580  -5.263  23.828  1.00  1.00      4S   
ATOM   2047 O    THR    76      14.229  -6.233  24.209  1.00  1.00      4S   
ATOM   2048 N    ASN    77      12.247  -5.331  23.620  1.00  1.00      4S   
ATOM   2049 HN   ASN    77      11.743  -4.548  23.264  1.00  0.00      4S   
ATOM   2050 CA   ASN    77      11.465  -6.495  23.950  1.00  1.00      4S   
ATOM   2051 HA   ASN    77      12.007  -7.085  24.668  1.00  0.00      4S   
ATOM   2052 CB   ASN    77      10.087  -6.110  24.539  1.00  1.00      4S   
ATOM   2053 HB1  ASN    77       9.552  -7.024  24.873  1.00  0.00      4S   
ATOM   2054 HB2  ASN    77       9.481  -5.593  23.765  1.00  0.00      4S   
ATOM   2055 CG   ASN    77      10.266  -5.186  25.753  1.00  1.00      4S   
ATOM   2056 OD1  ASN    77      10.692  -5.609  26.831  1.00  1.00      4S   
ATOM   2057 ND2  ASN    77       9.922  -3.880  25.562  1.00  1.00      4S   
ATOM   2058 HD21 ASN    77      10.005  -3.235  26.321  1.00  0.00      4S   
ATOM   2059 HD22 ASN    77       9.586  -3.580  24.670  1.00  0.00      4S   
ATOM   2060 C    ASN    77      11.278  -7.354  22.726  1.00  1.00      4S   
ATOM   2061 O    ASN    77      10.158  -7.606  22.281  1.00  1.00      4S   
ATOM   2062 N    SER    78      12.403  -7.837  22.158  1.00  1.00      4S   
ATOM   2063 HN   SER    78      13.305  -7.636  22.537  1.00  0.00      4S   
ATOM   2064 CA   SER    78      12.374  -8.649  20.972  1.00  1.00      4S   
ATOM   2065 HA   SER    78      11.591  -9.387  21.080  1.00  0.00      4S   
ATOM   2066 CB   SER    78      12.126  -7.823  19.684  1.00  1.00      4S   
ATOM   2067 HB1  SER    78      11.185  -7.244  19.803  1.00  0.00      4S   
ATOM   2068 HB2  SER    78      12.026  -8.492  18.806  1.00  0.00      4S   
ATOM   2069 OG   SER    78      13.172  -6.902  19.422  1.00  1.00      4S   
ATOM   2070 HG1  SER    78      13.239  -6.328  20.197  1.00  0.00      4S   
ATOM   2071 C    SER    78      13.686  -9.374  20.904  1.00  1.00      4S   
ATOM   2072 O    SER    78      14.728  -8.830  21.267  1.00  1.00      4S   
ATOM   2073 N    SER    79      13.662 -10.641  20.436  1.00  1.00      4S   
ATOM   2074 HN   SER    79      12.826 -11.060  20.095  1.00  0.00      4S   
ATOM   2075 CA   SER    79      14.830 -11.491  20.442  1.00  1.00      4S   
ATOM   2076 HA   SER    79      15.254 -11.425  21.431  1.00  0.00      4S   
ATOM   2077 CB   SER    79      14.483 -12.971  20.143  1.00  1.00      4S   
ATOM   2078 HB1  SER    79      13.855 -13.359  20.964  1.00  0.00      4S   
ATOM   2079 HB2  SER    79      15.400 -13.593  20.076  1.00  0.00      4S   
ATOM   2080 OG   SER    79      13.713 -13.130  18.963  1.00  1.00      4S   
ATOM   2081 HG1  SER    79      14.329 -13.069  18.227  1.00  0.00      4S   
ATOM   2082 C    SER    79      15.851 -11.023  19.437  1.00  1.00      4S   
ATOM   2083 O    SER    79      15.463 -10.377  18.470  1.00  1.00      4S   
ATOM   2084 N    PRO    80      17.140 -11.334  19.566  1.00  1.00      4S   
ATOM   2085 CD   PRO    80      17.755 -11.792  20.814  1.00  1.00      4S   
ATOM   2086 HD1  PRO    80      17.604 -12.889  20.899  1.00  0.00      4S   
ATOM   2087 HD2  PRO    80      17.333 -11.274  21.705  1.00  0.00      4S   
ATOM   2088 CA   PRO    80      18.142 -10.982  18.569  1.00  1.00      4S   
ATOM   2089 HA   PRO    80      18.119  -9.914  18.429  1.00  0.00      4S   
ATOM   2090 CB   PRO    80      19.462 -11.486  19.155  1.00  1.00      4S   
ATOM   2091 HB1  PRO    80      20.313 -10.842  18.857  1.00  0.00      4S   
ATOM   2092 HB2  PRO    80      19.661 -12.537  18.845  1.00  0.00      4S   
ATOM   2093 CG   PRO    80      19.238 -11.459  20.668  1.00  1.00      4S   
ATOM   2094 HG1  PRO    80      19.886 -12.187  21.194  1.00  0.00      4S   
ATOM   2095 HG2  PRO    80      19.429 -10.433  21.052  1.00  0.00      4S   
ATOM   2096 C    PRO    80      17.883 -11.641  17.241  1.00  1.00      4S   
ATOM   2097 O    PRO    80      18.347 -11.138  16.220  1.00  1.00      4S   
ATOM   2098 N    ASP    81      17.105 -12.743  17.227  1.00  1.00      4S   
ATOM   2099 HN   ASP    81      16.794 -13.178  18.070  1.00  0.00      4S   
ATOM   2100 CA   ASP    81      16.707 -13.392  16.010  1.00  1.00      4S   
ATOM   2101 HA   ASP    81      17.582 -13.502  15.389  1.00  0.00      4S   
ATOM   2102 CB   ASP    81      16.089 -14.779  16.278  1.00  1.00      4S   
ATOM   2103 HB1  ASP    81      15.805 -15.257  15.318  1.00  0.00      4S   
ATOM   2104 HB2  ASP    81      15.183 -14.682  16.914  1.00  0.00      4S   
ATOM   2105 CG   ASP    81      17.104 -15.675  16.990  1.00  1.00      4S   
ATOM   2106 OD1  ASP    81      18.305 -15.646  16.612  1.00  1.00      4S   
ATOM   2107 OD2  ASP    81      16.680 -16.406  17.923  1.00  1.00      4S   
ATOM   2108 C    ASP    81      15.727 -12.558  15.227  1.00  1.00      4S   
ATOM   2109 O    ASP    81      15.567 -12.779  14.035  1.00  1.00      4S   
ATOM   2110 N    ASP    82      15.083 -11.555  15.859  1.00  1.00      4S   
ATOM   2111 HN   ASP    82      15.252 -11.351  16.823  1.00  0.00      4S   
ATOM   2112 CA   ASP    82      14.082 -10.732  15.229  1.00  1.00      4S   
ATOM   2113 HA   ASP    82      13.556 -11.314  14.494  1.00  0.00      4S   
ATOM   2114 CB   ASP    82      13.060 -10.190  16.244  1.00  1.00      4S   
ATOM   2115 HB1  ASP    82      12.329  -9.512  15.752  1.00  0.00      4S   
ATOM   2116 HB2  ASP    82      13.582  -9.616  17.040  1.00  0.00      4S   
ATOM   2117 CG   ASP    82      12.287 -11.325  16.898  1.00  1.00      4S   
ATOM   2118 OD1  ASP    82      12.392 -12.513  16.495  1.00  1.00      4S   
ATOM   2119 OD2  ASP    82      11.559 -11.000  17.867  1.00  1.00      4S   
ATOM   2120 C    ASP    82      14.671  -9.550  14.521  1.00  1.00      4S   
ATOM   2121 O    ASP    82      13.954  -8.885  13.784  1.00  1.00      4S   
ATOM   2122 N    GLN    83      15.973  -9.244  14.711  1.00  1.00      4S   
ATOM   2123 HN   GLN    83      16.570  -9.819  15.266  1.00  0.00      4S   
ATOM   2124 CA   GLN    83      16.557  -8.006  14.247  1.00  1.00      4S   
ATOM   2125 HA   GLN    83      15.831  -7.214  14.367  1.00  0.00      4S   
ATOM   2126 CB   GLN    83      17.803  -7.639  15.077  1.00  1.00      4S   
ATOM   2127 HB1  GLN    83      18.098  -6.592  14.853  1.00  0.00      4S   
ATOM   2128 HB2  GLN    83      18.643  -8.315  14.801  1.00  0.00      4S   
ATOM   2129 CG   GLN    83      17.613  -7.772  16.595  1.00  1.00      4S   
ATOM   2130 HG1  GLN    83      18.518  -7.415  17.127  1.00  0.00      4S   
ATOM   2131 HG2  GLN    83      17.469  -8.845  16.828  1.00  0.00      4S   
ATOM   2132 CD   GLN    83      16.401  -6.970  17.071  1.00  1.00      4S   
ATOM   2133 OE1  GLN    83      16.238  -5.787  16.758  1.00  1.00      4S   
ATOM   2134 NE2  GLN    83      15.523  -7.656  17.853  1.00  1.00      4S   
ATOM   2135 HE21 GLN    83      14.706  -7.204  18.212  1.00  0.00      4S   
ATOM   2136 HE22 GLN    83      15.695  -8.620  18.071  1.00  0.00      4S   
ATOM   2137 C    GLN    83      16.919  -8.076  12.785  1.00  1.00      4S   
ATOM   2138 O    GLN    83      18.087  -8.069  12.409  1.00  1.00      4S   
ATOM   2139 N    ILE    84      15.891  -8.148  11.922  1.00  1.00      4S   
ATOM   2140 HN   ILE    84      14.953  -8.180  12.266  1.00  0.00      4S   
ATOM   2141 CA   ILE    84      16.050  -8.293  10.505  1.00  1.00      4S   
ATOM   2142 HA   ILE    84      16.810  -7.595  10.190  1.00  0.00      4S   
ATOM   2143 CB   ILE    84      16.443  -9.708  10.095  1.00  1.00      4S   
ATOM   2144 HB   ILE    84      17.429  -9.930  10.565  1.00  0.00      4S   
ATOM   2145 CG2  ILE    84      15.426 -10.736  10.618  1.00  1.00      4S   
ATOM   2146 HG21 ILE    84      14.478 -10.656  10.048  1.00  0.00      4S   
ATOM   2147 HG22 ILE    84      15.221 -10.601  11.698  1.00  0.00      4S   
ATOM   2148 HG23 ILE    84      15.827 -11.756  10.476  1.00  0.00      4S   
ATOM   2149 CG1  ILE    84      16.632  -9.842   8.576  1.00  1.00      4S   
ATOM   2150 HG11 ILE    84      17.315  -9.039   8.235  1.00  0.00      4S   
ATOM   2151 HG12 ILE    84      15.653  -9.690   8.072  1.00  0.00      4S   
ATOM   2152 CD   ILE    84      17.200 -11.200   8.164  1.00  1.00      4S   
ATOM   2153 HD1  ILE    84      16.515 -12.018   8.467  1.00  0.00      4S   
ATOM   2154 HD2  ILE    84      18.189 -11.369   8.641  1.00  0.00      4S   
ATOM   2155 HD3  ILE    84      17.317 -11.243   7.062  1.00  0.00      4S   
ATOM   2156 C    ILE    84      14.751  -7.861   9.882  1.00  1.00      4S   
ATOM   2157 O    ILE    84      13.666  -8.174  10.374  1.00  1.00      4S   
ATOM   2158 N    GLY    85      14.836  -7.089   8.779  1.00  1.00      4S   
ATOM   2159 HN   GLY    85      15.715  -6.855   8.362  1.00  0.00      4S   
ATOM   2160 CA   GLY    85      13.655  -6.546   8.167  1.00  1.00      4S   
ATOM   2161 HA1  GLY    85      13.120  -5.981   8.915  1.00  0.00      4S   
ATOM   2162 HA2  GLY    85      13.092  -7.362   7.740  1.00  0.00      4S   
ATOM   2163 C    GLY    85      14.043  -5.614   7.072  1.00  1.00      4S   
ATOM   2164 O    GLY    85      15.152  -5.671   6.550  1.00  1.00      4S   
ATOM   2165 N    TYR    86      13.108  -4.726   6.685  1.00  1.00      4S   
ATOM   2166 HN   TYR    86      12.217  -4.674   7.138  1.00  0.00      4S   
ATOM   2167 CA   TYR    86      13.295  -3.853   5.558  1.00  1.00      4S   
ATOM   2168 HA   TYR    86      14.351  -3.656   5.447  1.00  0.00      4S   
ATOM   2169 CB   TYR    86      12.748  -4.447   4.232  1.00  1.00      4S   
ATOM   2170 HB1  TYR    86      13.237  -5.415   4.049  1.00  0.00      4S   
ATOM   2171 HB2  TYR    86      12.983  -3.783   3.377  1.00  0.00      4S   
ATOM   2172 CG   TYR    86      11.270  -4.700   4.248  1.00  1.00      4S   
ATOM   2173 CD1  TYR    86      10.744  -5.865   4.830  1.00  1.00      4S   
ATOM   2174 HD1  TYR    86      11.404  -6.594   5.276  1.00  0.00      4S   
ATOM   2175 CE1  TYR    86       9.365  -6.082   4.853  1.00  1.00      4S   
ATOM   2176 HE1  TYR    86       8.969  -6.972   5.318  1.00  0.00      4S   
ATOM   2177 CZ   TYR    86       8.515  -5.126   4.288  1.00  1.00      4S   
ATOM   2178 OH   TYR    86       7.134  -5.298   4.345  1.00  1.00      4S   
ATOM   2179 HH   TYR    86       6.976  -6.150   4.773  1.00  0.00      4S   
ATOM   2180 CD2  TYR    86      10.398  -3.753   3.690  1.00  1.00      4S   
ATOM   2181 HD2  TYR    86      10.794  -2.850   3.249  1.00  0.00      4S   
ATOM   2182 CE2  TYR    86       9.020  -3.965   3.706  1.00  1.00      4S   
ATOM   2183 HE2  TYR    86       8.345  -3.240   3.277  1.00  0.00      4S   
ATOM   2184 C    TYR    86      12.630  -2.538   5.811  1.00  1.00      4S   
ATOM   2185 O    TYR    86      11.725  -2.433   6.630  1.00  1.00      4S   
ATOM   2186 N    TYR    87      13.063  -1.507   5.063  1.00  1.00      4S   
ATOM   2187 HN   TYR    87      13.843  -1.620   4.448  1.00  0.00      4S   
ATOM   2188 CA   TYR    87      12.441  -0.211   5.054  1.00  1.00      4S   
ATOM   2189 HA   TYR    87      11.706  -0.153   5.836  1.00  0.00      4S   
ATOM   2190 CB   TYR    87      13.455   0.935   5.202  1.00  1.00      4S   
ATOM   2191 HB1  TYR    87      13.020   1.903   4.885  1.00  0.00      4S   
ATOM   2192 HB2  TYR    87      14.340   0.723   4.583  1.00  0.00      4S   
ATOM   2193 CG   TYR    87      13.921   1.091   6.611  1.00  1.00      4S   
ATOM   2194 CD1  TYR    87      14.836   0.191   7.181  1.00  1.00      4S   
ATOM   2195 HD1  TYR    87      15.200  -0.653   6.613  1.00  0.00      4S   
ATOM   2196 CE1  TYR    87      15.281   0.381   8.491  1.00  1.00      4S   
ATOM   2197 HE1  TYR    87      15.967  -0.330   8.915  1.00  0.00      4S   
ATOM   2198 CZ   TYR    87      14.822   1.476   9.234  1.00  1.00      4S   
ATOM   2199 OH   TYR    87      15.266   1.707  10.543  1.00  1.00      4S   
ATOM   2200 HH   TYR    87      15.953   1.053  10.724  1.00  0.00      4S   
ATOM   2201 CD2  TYR    87      13.473   2.184   7.369  1.00  1.00      4S   
ATOM   2202 HD2  TYR    87      12.788   2.896   6.940  1.00  0.00      4S   
ATOM   2203 CE2  TYR    87      13.919   2.376   8.675  1.00  1.00      4S   
ATOM   2204 HE2  TYR    87      13.572   3.223   9.247  1.00  0.00      4S   
ATOM   2205 C    TYR    87      11.754  -0.030   3.732  1.00  1.00      4S   
ATOM   2206 O    TYR    87      12.345  -0.268   2.684  1.00  1.00      4S   
ATOM   2207 N    ARG    88      10.479   0.411   3.767  1.00  1.00      4S   
ATOM   2208 HN   ARG    88      10.021   0.578   4.640  1.00  0.00      4S   
ATOM   2209 CA   ARG    88       9.679   0.671   2.605  1.00  1.00      4S   
ATOM   2210 HA   ARG    88      10.213   0.373   1.725  1.00  0.00      4S   
ATOM   2211 CB   ARG    88       8.347  -0.092   2.658  1.00  1.00      4S   
ATOM   2212 HB1  ARG    88       7.767   0.226   3.551  1.00  0.00      4S   
ATOM   2213 HB2  ARG    88       8.577  -1.174   2.776  1.00  0.00      4S   
ATOM   2214 CG   ARG    88       7.478   0.068   1.407  1.00  1.00      4S   
ATOM   2215 HG1  ARG    88       8.043  -0.261   0.509  1.00  0.00      4S   
ATOM   2216 HG2  ARG    88       7.216   1.140   1.269  1.00  0.00      4S   
ATOM   2217 CD   ARG    88       6.208  -0.762   1.543  1.00  1.00      4S   
ATOM   2218 HD1  ARG    88       5.624  -0.419   2.425  1.00  0.00      4S   
ATOM   2219 HD2  ARG    88       6.446  -1.839   1.666  1.00  0.00      4S   
ATOM   2220 NE   ARG    88       5.396  -0.614   0.298  1.00  1.00      4S   
ATOM   2221 HE   ARG    88       5.512  -1.283  -0.435  1.00  0.00      4S   
ATOM   2222 CZ   ARG    88       4.465   0.366   0.147  1.00  1.00      4S   
ATOM   2223 NH1  ARG    88       4.267   1.294   1.113  1.00  1.00      4S   
ATOM   2224 HH11 ARG    88       4.864   1.296   1.913  1.00  0.00      4S   
ATOM   2225 HH12 ARG    88       3.490   1.922   1.054  1.00  0.00      4S   
ATOM   2226 NH2  ARG    88       3.725   0.417  -0.988  1.00  1.00      4S   
ATOM   2227 HH21 ARG    88       3.896  -0.251  -1.710  1.00  0.00      4S   
ATOM   2228 HH22 ARG    88       3.058   1.149  -1.109  1.00  0.00      4S   
ATOM   2229 C    ARG    88       9.410   2.141   2.518  1.00  1.00      4S   
ATOM   2230 O    ARG    88       8.832   2.736   3.425  1.00  1.00      4S   
ATOM   2231 N    ARG    89       9.822   2.765   1.396  1.00  1.00      4S   
ATOM   2232 HN   ARG    89      10.312   2.269   0.677  1.00  0.00      4S   
ATOM   2233 CA   ARG    89       9.615   4.168   1.156  1.00  1.00      4S   
ATOM   2234 HA   ARG    89       9.818   4.712   2.067  1.00  0.00      4S   
ATOM   2235 CB   ARG    89      10.558   4.666   0.052  1.00  1.00      4S   
ATOM   2236 HB1  ARG    89      10.473   3.978  -0.817  1.00  0.00      4S   
ATOM   2237 HB2  ARG    89      11.593   4.585   0.430  1.00  0.00      4S   
ATOM   2238 CG   ARG    89      10.361   6.119  -0.406  1.00  1.00      4S   
ATOM   2239 HG1  ARG    89      10.593   6.800   0.444  1.00  0.00      4S   
ATOM   2240 HG2  ARG    89       9.305   6.286  -0.705  1.00  0.00      4S   
ATOM   2241 CD   ARG    89      11.262   6.473  -1.589  1.00  1.00      4S   
ATOM   2242 HD1  ARG    89      12.326   6.344  -1.299  1.00  0.00      4S   
ATOM   2243 HD2  ARG    89      11.076   7.512  -1.931  1.00  0.00      4S   
ATOM   2244 NE   ARG    89      10.939   5.543  -2.717  1.00  1.00      4S   
ATOM   2245 HE   ARG    89      10.065   5.060  -2.708  1.00  0.00      4S   
ATOM   2246 CZ   ARG    89      11.811   5.299  -3.733  1.00  1.00      4S   
ATOM   2247 NH1  ARG    89      13.028   5.902  -3.772  1.00  1.00      4S   
ATOM   2248 HH11 ARG    89      13.292   6.528  -3.040  1.00  0.00      4S   
ATOM   2249 HH12 ARG    89      13.656   5.721  -4.526  1.00  0.00      4S   
ATOM   2250 NH2  ARG    89      11.454   4.438  -4.720  1.00  1.00      4S   
ATOM   2251 HH21 ARG    89      10.562   3.991  -4.684  1.00  0.00      4S   
ATOM   2252 HH22 ARG    89      12.082   4.266  -5.475  1.00  0.00      4S   
ATOM   2253 C    ARG    89       8.194   4.420   0.725  1.00  1.00      4S   
ATOM   2254 O    ARG    89       7.643   3.698  -0.104  1.00  1.00      4S   
ATOM   2255 N    ALA    90       7.579   5.476   1.300  1.00  1.00      4S   
ATOM   2256 HN   ALA    90       8.042   6.010   2.009  1.00  0.00      4S   
ATOM   2257 CA   ALA    90       6.248   5.906   0.966  1.00  1.00      4S   
ATOM   2258 HA   ALA    90       5.871   5.315   0.144  1.00  0.00      4S   
ATOM   2259 CB   ALA    90       5.303   5.761   2.173  1.00  1.00      4S   
ATOM   2260 HB1  ALA    90       5.670   6.355   3.037  1.00  0.00      4S   
ATOM   2261 HB2  ALA    90       5.263   4.694   2.484  1.00  0.00      4S   
ATOM   2262 HB3  ALA    90       4.275   6.089   1.913  1.00  0.00      4S   
ATOM   2263 C    ALA    90       6.304   7.348   0.509  1.00  1.00      4S   
ATOM   2264 O    ALA    90       6.869   8.196   1.203  1.00  1.00      4S   
ATOM   2265 N    THR    91       5.718   7.628  -0.696  1.00  1.00      4S   
ATOM   2266 HN   THR    91       5.248   6.906  -1.194  1.00  0.00      4S   
ATOM   2267 CA   THR    91       5.701   8.929  -1.367  1.00  1.00      4S   
ATOM   2268 HA   THR    91       6.039   9.669  -0.645  1.00  0.00      4S   
ATOM   2269 CB   THR    91       6.510   9.069  -2.637  1.00  1.00      4S   
ATOM   2270 HB   THR    91       6.049   8.429  -3.426  1.00  0.00      4S   
ATOM   2271 OG1  THR    91       7.820   8.609  -2.405  1.00  1.00      4S   
ATOM   2272 HG1  THR    91       8.318   9.076  -3.078  1.00  0.00      4S   
ATOM   2273 CG2  THR    91       6.657  10.535  -3.161  1.00  1.00      4S   
ATOM   2274 HG21 THR    91       7.040  11.205  -2.360  1.00  0.00      4S   
ATOM   2275 HG22 THR    91       5.728  10.997  -3.534  1.00  0.00      4S   
ATOM   2276 HG23 THR    91       7.261  10.576  -4.082  1.00  0.00      4S   
ATOM   2277 C    THR    91       4.305   9.216  -1.918  1.00  1.00      4S   
ATOM   2278 O    THR    91       3.456   8.346  -2.061  1.00  1.00      4S   
ATOM   2279 N    ARG    92       4.019  10.535  -2.118  1.00  1.00      4S   
ATOM   2280 HN   ARG    92       4.642  11.147  -1.630  1.00  0.00      4S   
ATOM   2281 CA   ARG    92       2.654  11.208  -1.884  1.00  1.00      4S   
ATOM   2282 HA   ARG    92       2.015  10.575  -2.638  1.00  0.00      4S   
ATOM   2283 CB   ARG    92       1.578  11.109   1.996  1.00  1.00      4S   
ATOM   2284 HB1  ARG    92       0.904  10.362   1.609  1.00  0.00      4S   
ATOM   2285 HB2  ARG    92       1.484  12.156   1.909  1.00  0.00      4S   
ATOM   2286 CG   ARG    92       3.048  10.627   2.568  1.00  0.00      4S   
ATOM   2287 HG1  ARG    92       2.466   9.701   2.751  1.00  0.00      4S   
ATOM   2288 HG2  ARG    92       3.166  11.707   2.851  1.00  0.00      4S   
ATOM   2289 CD   ARG    92       4.251  10.244   1.729  1.00  0.00      4S   
ATOM   2290 HD1  ARG    92       4.458   9.171   1.591  1.00  0.00      4S   
ATOM   2291 HD2  ARG    92       5.193  10.830   1.878  1.00  0.00      4S   
ATOM   2292 NE   ARG    92       3.782  10.580   0.501  1.00  0.00      4S   
ATOM   2293 HE   ARG    92       4.525  10.482  -0.168  1.00  0.00      4S   
ATOM   2294 CZ   ARG    92       2.488  10.364   0.054  1.00  0.00      4S   
ATOM   2295 NH1  ARG    92       2.654  11.900   0.200  1.00  0.00      4S   
ATOM   2296 HH11 ARG    92       2.651  12.867  -0.040  1.00  0.00      4S   
ATOM   2297 HH12 ARG    92       2.097  11.161   0.650  1.00  0.00      4S   
ATOM   2298 NH2  ARG    92       1.105  11.197  -0.288  1.00  0.00      4S   
ATOM   2299 HH21 ARG    92       1.017  12.181   0.225  1.00  0.00      4S   
ATOM   2300 HH22 ARG    92       0.232  10.915  -0.577  1.00  0.00      4S   
ATOM   2301 C    ARG    92       3.244  12.632  -2.334  1.00  1.00      4S   
ATOM   2302 OT1  ARG    92       2.868  13.320  -3.283  1.00  1.00      4S   
ATOM   2303 OT2  ARG    92       4.071  13.077  -1.475  1.00  0.00      4S   
TER 
ATOM   2304 N    LYS   102       2.758  17.855  -4.721  1.00  1.00      5S   
ATOM   2305 HT1  LYS   102       2.775  17.178  -5.534  1.00  0.00      5S   
ATOM   2306 HT2  LYS   102       2.338  18.284  -5.580  1.00  0.00      5S   
ATOM   2307 HT3  LYS   102       1.944  18.413  -4.409  1.00  0.00      5S   
ATOM   2308 CA   LYS   102       4.174  18.767  -4.342  1.00  1.00      5S   
ATOM   2309 HA   LYS   102       4.891  18.884  -5.152  1.00  0.00      5S   
ATOM   2310 CB   LYS   102       4.618  20.331  -4.172  1.00  1.00      5S   
ATOM   2311 HB1  LYS   102       5.406  20.729  -4.890  1.00  0.00      5S   
ATOM   2312 HB2  LYS   102       5.174  20.388  -3.216  1.00  0.00      5S   
ATOM   2313 CG   LYS   102       3.597  21.452  -4.228  1.00  0.00      5S   
ATOM   2314 HG1  LYS   102       3.959  22.361  -4.777  1.00  0.00      5S   
ATOM   2315 HG2  LYS   102       3.402  21.721  -3.157  1.00  0.00      5S   
ATOM   2316 CD   LYS   102       2.332  21.100  -4.958  1.00  0.00      5S   
ATOM   2317 HD1  LYS   102       1.901  21.954  -5.507  1.00  0.00      5S   
ATOM   2318 HD2  LYS   102       1.575  20.971  -4.121  1.00  0.00      5S   
ATOM   2319 CE   LYS   102       2.337  20.077  -6.196  1.00  0.00      5S   
ATOM   2320 HE1  LYS   102       1.555  20.157  -6.903  1.00  0.00      5S   
ATOM   2321 HE2  LYS   102       1.751  19.562  -5.415  1.00  0.00      5S   
ATOM   2322 NZ   LYS   102       3.454  19.048  -6.831  1.00  0.00      5S   
ATOM   2323 HZ1  LYS   102       3.719  18.536  -5.962  1.00  0.00      5S   
ATOM   2324 HZ2  LYS   102       4.419  19.387  -6.659  1.00  0.00      5S   
ATOM   2325 HZ3  LYS   102       3.296  17.996  -6.822  1.00  0.00      5S   
ATOM   2326 C    LYS   102       4.720  17.726  -3.709  1.00  1.00      5S   
ATOM   2327 O    LYS   102       4.082  17.303  -2.757  1.00  1.00      5S   
ATOM   2328 N    ASP   103       5.806  17.135  -4.260  1.00  1.00      5S   
ATOM   2329 HN   ASP   103       6.320  17.400  -5.082  1.00  0.00      5S   
ATOM   2330 CA   ASP   103       6.193  15.934  -3.616  1.00  1.00      5S   
ATOM   2331 HA   ASP   103       5.298  15.336  -3.464  1.00  0.00      5S   
ATOM   2332 CB   ASP   103       7.271  15.142  -4.369  1.00  1.00      5S   
ATOM   2333 HB1  ASP   103       7.848  14.527  -3.647  1.00  0.00      5S   
ATOM   2334 HB2  ASP   103       7.958  15.858  -4.868  1.00  0.00      5S   
ATOM   2335 CG   ASP   103       6.677  14.199  -5.416  1.00  1.00      5S   
ATOM   2336 OD1  ASP   103       5.550  13.681  -5.206  1.00  1.00      5S   
ATOM   2337 OD2  ASP   103       7.374  13.967  -6.439  1.00  1.00      5S   
ATOM   2338 C    ASP   103       6.736  16.363  -2.286  1.00  1.00      5S   
ATOM   2339 O    ASP   103       7.390  17.399  -2.166  1.00  1.00      5S   
ATOM   2340 N    LEU   104       6.353  15.610  -1.253  1.00  1.00      5S   
ATOM   2341 HN   LEU   104       5.734  14.833  -1.366  1.00  0.00      5S   
ATOM   2342 CA   LEU   104       6.798  15.890   0.071  1.00  1.00      5S   
ATOM   2343 HA   LEU   104       7.073  16.931   0.170  1.00  0.00      5S   
ATOM   2344 CB   LEU   104       5.718  15.522   1.097  1.00  1.00      5S   
ATOM   2345 HB1  LEU   104       6.133  15.590   2.119  1.00  0.00      5S   
ATOM   2346 HB2  LEU   104       5.407  14.467   0.941  1.00  0.00      5S   
ATOM   2347 CG   LEU   104       4.470  16.426   1.046  1.00  1.00      5S   
ATOM   2348 HG   LEU   104       4.072  16.440   0.005  1.00  0.00      5S   
ATOM   2349 CD1  LEU   104       3.386  15.835   1.958  1.00  1.00      5S   
ATOM   2350 HD11 LEU   104       3.817  15.634   2.961  1.00  0.00      5S   
ATOM   2351 HD12 LEU   104       3.008  14.879   1.542  1.00  0.00      5S   
ATOM   2352 HD13 LEU   104       2.540  16.544   2.064  1.00  0.00      5S   
ATOM   2353 CD2  LEU   104       4.796  17.879   1.437  1.00  1.00      5S   
ATOM   2354 HD21 LEU   104       5.547  18.316   0.747  1.00  0.00      5S   
ATOM   2355 HD22 LEU   104       5.194  17.916   2.471  1.00  0.00      5S   
ATOM   2356 HD23 LEU   104       3.879  18.503   1.399  1.00  0.00      5S   
ATOM   2357 C    LEU   104       8.024  15.070   0.306  1.00  1.00      5S   
ATOM   2358 O    LEU   104       8.433  14.268  -0.534  1.00  1.00      5S   
ATOM   2359 N    SER   105       8.651  15.265   1.483  1.00  1.00      5S   
ATOM   2360 HN   SER   105       8.335  15.947   2.140  1.00  0.00      5S   
ATOM   2361 CA   SER   105       9.824  14.530   1.869  1.00  1.00      5S   
ATOM   2362 HA   SER   105      10.557  14.694   1.100  1.00  0.00      5S   
ATOM   2363 CB   SER   105      10.400  15.035   3.203  1.00  1.00      5S   
ATOM   2364 HB1  SER   105      11.313  14.468   3.475  1.00  0.00      5S   
ATOM   2365 HB2  SER   105       9.650  14.913   4.014  1.00  0.00      5S   
ATOM   2366 OG   SER   105      10.724  16.416   3.094  1.00  1.00      5S   
ATOM   2367 HG1  SER   105      11.289  16.497   2.321  1.00  0.00      5S   
ATOM   2368 C    SER   105       9.483  13.060   2.005  1.00  1.00      5S   
ATOM   2369 O    SER   105       8.488  12.752   2.664  1.00  1.00      5S   
ATOM   2370 N    PRO   106      10.212  12.120   1.396  1.00  1.00      5S   
ATOM   2371 CD   PRO   106      11.348  12.362   0.503  1.00  1.00      5S   
ATOM   2372 HD1  PRO   106      12.265  12.411   1.118  1.00  0.00      5S   
ATOM   2373 HD2  PRO   106      11.253  13.290  -0.099  1.00  0.00      5S   
ATOM   2374 CA   PRO   106       9.843  10.715   1.430  1.00  1.00      5S   
ATOM   2375 HA   PRO   106       8.806  10.611   1.144  1.00  0.00      5S   
ATOM   2376 CB   PRO   106      10.812  10.021   0.456  1.00  1.00      5S   
ATOM   2377 HB1  PRO   106      10.280   9.279  -0.174  1.00  0.00      5S   
ATOM   2378 HB2  PRO   106      11.646   9.520   0.995  1.00  0.00      5S   
ATOM   2379 CG   PRO   106      11.391  11.144  -0.411  1.00  1.00      5S   
ATOM   2380 HG1  PRO   106      12.421  10.917  -0.754  1.00  0.00      5S   
ATOM   2381 HG2  PRO   106      10.731  11.329  -1.286  1.00  0.00      5S   
ATOM   2382 C    PRO   106      10.012  10.178   2.821  1.00  1.00      5S   
ATOM   2383 O    PRO   106      10.874  10.659   3.548  1.00  1.00      5S   
ATOM   2384 N    ARG   107       9.167   9.214   3.213  1.00  1.00      5S   
ATOM   2385 HN   ARG   107       8.472   8.860   2.593  1.00  0.00      5S   
ATOM   2386 CA   ARG   107       9.153   8.695   4.552  1.00  1.00      5S   
ATOM   2387 HA   ARG   107       9.966   9.111   5.132  1.00  0.00      5S   
ATOM   2388 CB   ARG   107       7.817   8.990   5.259  1.00  1.00      5S   
ATOM   2389 HB1  ARG   107       7.808   8.459   6.232  1.00  0.00      5S   
ATOM   2390 HB2  ARG   107       6.969   8.605   4.654  1.00  0.00      5S   
ATOM   2391 CG   ARG   107       7.595  10.487   5.530  1.00  1.00      5S   
ATOM   2392 HG1  ARG   107       6.953  10.928   4.738  1.00  0.00      5S   
ATOM   2393 HG2  ARG   107       8.581  11.006   5.483  1.00  0.00      5S   
ATOM   2394 CD   ARG   107       7.016  10.748   6.923  1.00  1.00      5S   
ATOM   2395 HD1  ARG   107       7.337  11.742   7.286  1.00  0.00      5S   
ATOM   2396 HD2  ARG   107       7.356   9.977   7.638  1.00  0.00      5S   
ATOM   2397 NE   ARG   107       5.525  10.710   6.878  1.00  1.00      5S   
ATOM   2398 HE   ARG   107       5.066  10.479   6.022  1.00  0.00      5S   
ATOM   2399 CZ   ARG   107       4.771  10.999   7.975  1.00  1.00      5S   
ATOM   2400 NH1  ARG   107       5.349  11.328   9.159  1.00  1.00      5S   
ATOM   2401 HH11 ARG   107       4.788  11.699   9.898  1.00  0.00      5S   
ATOM   2402 HH12 ARG   107       6.341  11.282   9.252  1.00  0.00      5S   
ATOM   2403 NH2  ARG   107       3.417  10.961   7.883  1.00  1.00      5S   
ATOM   2404 HH21 ARG   107       2.856  11.109   8.694  1.00  0.00      5S   
ATOM   2405 HH22 ARG   107       2.999  10.880   6.979  1.00  0.00      5S   
ATOM   2406 C    ARG   107       9.351   7.212   4.465  1.00  1.00      5S   
ATOM   2407 O    ARG   107       8.672   6.529   3.707  1.00  1.00      5S   
ATOM   2408 N    TRP   108      10.314   6.682   5.242  1.00  1.00      5S   
ATOM   2409 HN   TRP   108      10.847   7.261   5.862  1.00  0.00      5S   
ATOM   2410 CA   TRP   108      10.736   5.307   5.178  1.00  1.00      5S   
ATOM   2411 HA   TRP   108      10.296   4.823   4.319  1.00  0.00      5S   
ATOM   2412 CB   TRP   108      12.271   5.184   5.087  1.00  1.00      5S   
ATOM   2413 HB1  TRP   108      12.575   4.122   5.178  1.00  0.00      5S   
ATOM   2414 HB2  TRP   108      12.730   5.753   5.926  1.00  0.00      5S   
ATOM   2415 CG   TRP   108      12.839   5.737   3.795  1.00  1.00      5S   
ATOM   2416 CD1  TRP   108      13.089   7.043   3.482  1.00  1.00      5S   
ATOM   2417 HD1  TRP   108      12.914   7.879   4.142  1.00  0.00      5S   
ATOM   2418 NE1  TRP   108      13.598   7.141   2.211  1.00  1.00      5S   
ATOM   2419 HE1  TRP   108      13.860   7.966   1.754  1.00  0.00      5S   
ATOM   2420 CE2  TRP   108      13.692   5.880   1.674  1.00  1.00      5S   
ATOM   2421 CD2  TRP   108      13.216   4.964   2.638  1.00  1.00      5S   
ATOM   2422 CE3  TRP   108      13.181   3.596   2.369  1.00  1.00      5S   
ATOM   2423 HE3  TRP   108      12.796   2.878   3.070  1.00  0.00      5S   
ATOM   2424 CZ3  TRP   108      13.639   3.159   1.115  1.00  1.00      5S   
ATOM   2425 HZ3  TRP   108      13.602   2.107   0.873  1.00  0.00      5S   
ATOM   2426 CZ2  TRP   108      14.144   5.448   0.435  1.00  1.00      5S   
ATOM   2427 HZ2  TRP   108      14.489   6.143  -0.315  1.00  0.00      5S   
ATOM   2428 CH2  TRP   108      14.111   4.073   0.160  1.00  1.00      5S   
ATOM   2429 HH2  TRP   108      14.428   3.721  -0.810  1.00  0.00      5S   
ATOM   2430 C    TRP   108      10.256   4.613   6.417  1.00  1.00      5S   
ATOM   2431 O    TRP   108      10.563   5.023   7.530  1.00  1.00      5S   
ATOM   2432 N    TYR   109       9.470   3.534   6.249  1.00  1.00      5S   
ATOM   2433 HN   TYR   109       9.245   3.198   5.335  1.00  0.00      5S   
ATOM   2434 CA   TYR   109       8.860   2.833   7.357  1.00  1.00      5S   
ATOM   2435 HA   TYR   109       9.065   3.338   8.290  1.00  0.00      5S   
ATOM   2436 CB   TYR   109       7.334   2.665   7.164  1.00  1.00      5S   
ATOM   2437 HB1  TYR   109       6.928   1.941   7.901  1.00  0.00      5S   
ATOM   2438 HB2  TYR   109       7.121   2.294   6.138  1.00  0.00      5S   
ATOM   2439 CG   TYR   109       6.599   3.969   7.353  1.00  1.00      5S   
ATOM   2440 CD1  TYR   109       6.386   4.847   6.273  1.00  1.00      5S   
ATOM   2441 HD1  TYR   109       6.779   4.605   5.296  1.00  0.00      5S   
ATOM   2442 CE1  TYR   109       5.661   6.034   6.449  1.00  1.00      5S   
ATOM   2443 HE1  TYR   109       5.518   6.708   5.617  1.00  0.00      5S   
ATOM   2444 CZ   TYR   109       5.127   6.345   7.705  1.00  1.00      5S   
ATOM   2445 OH   TYR   109       4.428   7.553   7.900  1.00  1.00      5S   
ATOM   2446 HH   TYR   109       4.175   7.596   8.825  1.00  0.00      5S   
ATOM   2447 CD2  TYR   109       6.072   4.306   8.613  1.00  1.00      5S   
ATOM   2448 HD2  TYR   109       6.227   3.648   9.455  1.00  0.00      5S   
ATOM   2449 CE2  TYR   109       5.334   5.482   8.788  1.00  1.00      5S   
ATOM   2450 HE2  TYR   109       4.953   5.735   9.768  1.00  0.00      5S   
ATOM   2451 C    TYR   109       9.472   1.464   7.440  1.00  1.00      5S   
ATOM   2452 O    TYR   109       9.697   0.822   6.423  1.00  1.00      5S   
ATOM   2453 N    PHE   110       9.754   0.979   8.669  1.00  1.00      5S   
ATOM   2454 HN   PHE   110       9.539   1.497   9.493  1.00  0.00      5S   
ATOM   2455 CA   PHE   110      10.407  -0.292   8.881  1.00  1.00      5S   
ATOM   2456 HA   PHE   110      10.980  -0.548   8.003  1.00  0.00      5S   
ATOM   2457 CB   PHE   110      11.376  -0.228  10.091  1.00  1.00      5S   
ATOM   2458 HB1  PHE   110      10.849   0.184  10.977  1.00  0.00      5S   
ATOM   2459 HB2  PHE   110      12.224   0.444   9.842  1.00  0.00      5S   
ATOM   2460 CG   PHE   110      11.951  -1.570  10.461  1.00  1.00      5S   
ATOM   2461 CD1  PHE   110      13.041  -2.107   9.765  1.00  1.00      5S   
ATOM   2462 HD1  PHE   110      13.487  -1.547   8.959  1.00  0.00      5S   
ATOM   2463 CE1  PHE   110      13.543  -3.367  10.103  1.00  1.00      5S   
ATOM   2464 HE1  PHE   110      14.379  -3.777   9.566  1.00  0.00      5S   
ATOM   2465 CZ   PHE   110      12.955  -4.107  11.134  1.00  1.00      5S   
ATOM   2466 HZ   PHE   110      13.344  -5.080  11.394  1.00  0.00      5S   
ATOM   2467 CD2  PHE   110      11.355  -2.328  11.483  1.00  1.00      5S   
ATOM   2468 HD2  PHE   110      10.492  -1.941  11.999  1.00  0.00      5S   
ATOM   2469 CE2  PHE   110      11.856  -3.585  11.822  1.00  1.00      5S   
ATOM   2470 HE2  PHE   110      11.396  -4.149  12.614  1.00  0.00      5S   
ATOM   2471 C    PHE   110       9.375  -1.369   9.100  1.00  1.00      5S   
ATOM   2472 O    PHE   110       8.427  -1.205   9.859  1.00  1.00      5S   
ATOM   2473 N    TYR   111       9.580  -2.533   8.459  1.00  1.00      5S   
ATOM   2474 HN   TYR   111      10.344  -2.643   7.821  1.00  0.00      5S   
ATOM   2475 CA   TYR   111       8.763  -3.694   8.669  1.00  1.00      5S   
ATOM   2476 HA   TYR   111       8.180  -3.592   9.570  1.00  0.00      5S   
ATOM   2477 CB   TYR   111       7.850  -3.993   7.465  1.00  1.00      5S   
ATOM   2478 HB1  TYR   111       7.294  -4.943   7.608  1.00  0.00      5S   
ATOM   2479 HB2  TYR   111       8.468  -4.061   6.550  1.00  0.00      5S   
ATOM   2480 CG   TYR   111       6.851  -2.898   7.248  1.00  1.00      5S   
ATOM   2481 CD1  TYR   111       5.611  -2.941   7.908  1.00  1.00      5S   
ATOM   2482 HD1  TYR   111       5.375  -3.753   8.578  1.00  0.00      5S   
ATOM   2483 CE1  TYR   111       4.657  -1.953   7.681  1.00  1.00      5S   
ATOM   2484 HE1  TYR   111       3.698  -1.990   8.178  1.00  0.00      5S   
ATOM   2485 CZ   TYR   111       4.954  -0.911   6.812  1.00  1.00      5S   
ATOM   2486 OH   TYR   111       3.988   0.058   6.628  1.00  1.00      5S   
ATOM   2487 HH   TYR   111       3.225  -0.159   7.165  1.00  0.00      5S   
ATOM   2488 CD2  TYR   111       7.125  -1.837   6.362  1.00  1.00      5S   
ATOM   2489 HD2  TYR   111       8.070  -1.793   5.843  1.00  0.00      5S   
ATOM   2490 CE2  TYR   111       6.178  -0.831   6.149  1.00  1.00      5S   
ATOM   2491 HE2  TYR   111       6.391  -0.012   5.477  1.00  0.00      5S   
ATOM   2492 C    TYR   111       9.696  -4.851   8.858  1.00  1.00      5S   
ATOM   2493 O    TYR   111      10.658  -5.016   8.114  1.00  1.00      5S   
ATOM   2494 N    TYR   112       9.423  -5.707   9.868  1.00  1.00      5S   
ATOM   2495 HN   TYR   112       8.646  -5.563  10.476  1.00  0.00      5S   
ATOM   2496 CA   TYR   112      10.200  -6.896  10.136  1.00  1.00      5S   
ATOM   2497 HA   TYR   112      11.238  -6.607  10.229  1.00  0.00      5S   
ATOM   2498 CB   TYR   112       9.731  -7.623  11.422  1.00  1.00      5S   
ATOM   2499 HB1  TYR   112      10.175  -8.637  11.488  1.00  0.00      5S   
ATOM   2500 HB2  TYR   112       8.624  -7.713  11.429  1.00  0.00      5S   
ATOM   2501 CG   TYR   112      10.143  -6.885  12.660  1.00  1.00      5S   
ATOM   2502 CD1  TYR   112      11.370  -7.186  13.272  1.00  1.00      5S   
ATOM   2503 HD1  TYR   112      12.013  -7.923  12.823  1.00  0.00      5S   
ATOM   2504 CE1  TYR   112      11.758  -6.547  14.454  1.00  1.00      5S   
ATOM   2505 HE1  TYR   112      12.707  -6.781  14.917  1.00  0.00      5S   
ATOM   2506 CZ   TYR   112      10.916  -5.592  15.022  1.00  1.00      5S   
ATOM   2507 OH   TYR   112      11.363  -4.891  16.145  1.00  1.00      5S   
ATOM   2508 HH   TYR   112      12.293  -5.090  16.270  1.00  0.00      5S   
ATOM   2509 CD2  TYR   112       9.299  -5.934  13.257  1.00  1.00      5S   
ATOM   2510 HD2  TYR   112       8.347  -5.702  12.805  1.00  0.00      5S   
ATOM   2511 CE2  TYR   112       9.676  -5.295  14.444  1.00  1.00      5S   
ATOM   2512 HE2  TYR   112       9.025  -4.559  14.893  1.00  0.00      5S   
ATOM   2513 C    TYR   112      10.109  -7.870   8.982  1.00  1.00      5S   
ATOM   2514 O    TYR   112       9.237  -7.798   8.121  1.00  1.00      5S   
ATOM   2515 N    LEU   113      11.057  -8.814   8.904  1.00  1.00      5S   
ATOM   2516 HN   LEU   113      11.809  -8.851   9.560  1.00  0.00      5S   
ATOM   2517 CA   LEU   113      11.118  -9.750   7.812  1.00  1.00      5S   
ATOM   2518 HA   LEU   113      11.171  -9.187   6.889  1.00  0.00      5S   
ATOM   2519 CB   LEU   113      12.363 -10.632   7.972  1.00  1.00      5S   
ATOM   2520 HB1  LEU   113      12.330 -11.112   8.976  1.00  0.00      5S   
ATOM   2521 HB2  LEU   113      13.258  -9.971   7.945  1.00  0.00      5S   
ATOM   2522 CG   LEU   113      12.537 -11.725   6.907  1.00  1.00      5S   
ATOM   2523 HG   LEU   113      11.633 -12.378   6.908  1.00  0.00      5S   
ATOM   2524 CD1  LEU   113      12.707 -11.118   5.507  1.00  1.00      5S   
ATOM   2525 HD11 LEU   113      13.604 -10.462   5.496  1.00  0.00      5S   
ATOM   2526 HD12 LEU   113      11.821 -10.511   5.229  1.00  0.00      5S   
ATOM   2527 HD13 LEU   113      12.838 -11.920   4.752  1.00  0.00      5S   
ATOM   2528 CD2  LEU   113      13.730 -12.609   7.272  1.00  1.00      5S   
ATOM   2529 HD21 LEU   113      13.654 -12.935   8.331  1.00  0.00      5S   
ATOM   2530 HD22 LEU   113      14.675 -12.043   7.145  1.00  0.00      5S   
ATOM   2531 HD23 LEU   113      13.747 -13.506   6.621  1.00  0.00      5S   
ATOM   2532 C    LEU   113       9.888 -10.617   7.775  1.00  1.00      5S   
ATOM   2533 O    LEU   113       9.439 -11.106   8.804  1.00  1.00      5S   
ATOM   2534 N    GLY   114       9.276 -10.772   6.582  1.00  1.00      5S   
ATOM   2535 HN   GLY   114       9.652 -10.377   5.747  1.00  0.00      5S   
ATOM   2536 CA   GLY   114       8.077 -11.560   6.432  1.00  1.00      5S   
ATOM   2537 HA1  GLY   114       8.200 -12.478   6.985  1.00  0.00      5S   
ATOM   2538 HA2  GLY   114       7.957 -11.729   5.378  1.00  0.00      5S   
ATOM   2539 C    GLY   114       6.839 -10.873   6.943  1.00  1.00      5S   
ATOM   2540 O    GLY   114       5.833 -11.535   7.187  1.00  1.00      5S   
ATOM   2541 N    THR   115       6.878  -9.531   7.124  1.00  1.00      5S   
ATOM   2542 HN   THR   115       7.713  -9.011   6.952  1.00  0.00      5S   
ATOM   2543 CA   THR   115       5.740  -8.766   7.595  1.00  1.00      5S   
ATOM   2544 HA   THR   115       4.848  -9.374   7.540  1.00  0.00      5S   
ATOM   2545 CB   THR   115       5.894  -8.239   9.020  1.00  1.00      5S   
ATOM   2546 HB   THR   115       4.949  -7.765   9.360  1.00  0.00      5S   
ATOM   2547 OG1  THR   115       6.900  -7.252   9.143  1.00  1.00      5S   
ATOM   2548 HG1  THR   115       7.698  -7.667   8.787  1.00  0.00      5S   
ATOM   2549 CG2  THR   115       6.249  -9.396   9.962  1.00  1.00      5S   
ATOM   2550 HG21 THR   115       7.269  -9.785   9.752  1.00  0.00      5S   
ATOM   2551 HG22 THR   115       5.523 -10.225   9.836  1.00  0.00      5S   
ATOM   2552 HG23 THR   115       6.223  -9.047  11.015  1.00  0.00      5S   
ATOM   2553 C    THR   115       5.546  -7.614   6.658  1.00  1.00      5S   
ATOM   2554 O    THR   115       6.409  -7.347   5.831  1.00  1.00      5S   
ATOM   2555 N    GLY   116       4.407  -6.896   6.791  1.00  1.00      5S   
ATOM   2556 HN   GLY   116       3.693  -7.183   7.424  1.00  0.00      5S   
ATOM   2557 CA   GLY   116       4.186  -5.631   6.127  1.00  1.00      5S   
ATOM   2558 HA1  GLY   116       5.101  -5.062   6.196  1.00  0.00      5S   
ATOM   2559 HA2  GLY   116       3.352  -5.157   6.621  1.00  0.00      5S   
ATOM   2560 C    GLY   116       3.824  -5.806   4.682  1.00  1.00      5S   
ATOM   2561 O    GLY   116       3.487  -6.912   4.260  1.00  1.00      5S   
ATOM   2562 N    PRO   117       3.901  -4.745   3.881  1.00  1.00      5S   
ATOM   2563 CD   PRO   117       4.119  -3.374   4.358  1.00  1.00      5S   
ATOM   2564 HD1  PRO   117       5.214  -3.197   4.438  1.00  0.00      5S   
ATOM   2565 HD2  PRO   117       3.627  -3.173   5.336  1.00  0.00      5S   
ATOM   2566 CA   PRO   117       3.490  -4.779   2.484  1.00  1.00      5S   
ATOM   2567 HA   PRO   117       2.479  -5.157   2.434  1.00  0.00      5S   
ATOM   2568 CB   PRO   117       3.622  -3.324   2.010  1.00  1.00      5S   
ATOM   2569 HB1  PRO   117       2.831  -3.056   1.282  1.00  0.00      5S   
ATOM   2570 HB2  PRO   117       4.619  -3.146   1.551  1.00  0.00      5S   
ATOM   2571 CG   PRO   117       3.510  -2.480   3.283  1.00  1.00      5S   
ATOM   2572 HG1  PRO   117       4.041  -1.514   3.196  1.00  0.00      5S   
ATOM   2573 HG2  PRO   117       2.440  -2.292   3.513  1.00  0.00      5S   
ATOM   2574 C    PRO   117       4.348  -5.678   1.630  1.00  1.00      5S   
ATOM   2575 O    PRO   117       3.904  -6.043   0.545  1.00  1.00      5S   
ATOM   2576 N    GLU   118       5.565  -6.039   2.081  1.00  1.00      5S   
ATOM   2577 HN   GLU   118       5.933  -5.688   2.944  1.00  0.00      5S   
ATOM   2578 CA   GLU   118       6.437  -6.899   1.326  1.00  1.00      5S   
ATOM   2579 HA   GLU   118       5.936  -7.246   0.436  1.00  0.00      5S   
ATOM   2580 CB   GLU   118       7.739  -6.189   0.921  1.00  1.00      5S   
ATOM   2581 HB1  GLU   118       8.348  -6.867   0.288  1.00  0.00      5S   
ATOM   2582 HB2  GLU   118       8.336  -5.958   1.829  1.00  0.00      5S   
ATOM   2583 CG   GLU   118       7.490  -4.867   0.170  1.00  1.00      5S   
ATOM   2584 HG1  GLU   118       8.451  -4.326   0.089  1.00  0.00      5S   
ATOM   2585 HG2  GLU   118       6.784  -4.229   0.743  1.00  0.00      5S   
ATOM   2586 CD   GLU   118       6.940  -5.086  -1.239  1.00  1.00      5S   
ATOM   2587 OE1  GLU   118       7.006  -6.231  -1.762  1.00  1.00      5S   
ATOM   2588 OE2  GLU   118       6.460  -4.084  -1.834  1.00  1.00      5S   
ATOM   2589 C    GLU   118       6.771  -8.103   2.148  1.00  1.00      5S   
ATOM   2590 O    GLU   118       7.926  -8.519   2.234  1.00  1.00      5S   
ATOM   2591 N    ALA   119       5.740  -8.735   2.749  1.00  1.00      5S   
ATOM   2592 HN   ALA   119       4.806  -8.386   2.690  1.00  0.00      5S   
ATOM   2593 CA   ALA   119       5.918  -9.907   3.568  1.00  1.00      5S   
ATOM   2594 HA   ALA   119       6.698  -9.687   4.284  1.00  0.00      5S   
ATOM   2595 CB   ALA   119       4.624 -10.255   4.323  1.00  1.00      5S   
ATOM   2596 HB1  ALA   119       3.790 -10.445   3.618  1.00  0.00      5S   
ATOM   2597 HB2  ALA   119       4.334  -9.409   4.981  1.00  0.00      5S   
ATOM   2598 HB3  ALA   119       4.766 -11.153   4.960  1.00  0.00      5S   
ATOM   2599 C    ALA   119       6.355 -11.118   2.777  1.00  1.00      5S   
ATOM   2600 O    ALA   119       6.850 -12.086   3.347  1.00  1.00      5S   
ATOM   2601 N    GLY   120       6.208 -11.093   1.433  1.00  1.00      5S   
ATOM   2602 HN   GLY   120       5.816 -10.300   0.971  1.00  0.00      5S   
ATOM   2603 CA   GLY   120       6.573 -12.220   0.608  1.00  1.00      5S   
ATOM   2604 HA1  GLY   120       5.883 -12.238  -0.219  1.00  0.00      5S   
ATOM   2605 HA2  GLY   120       6.532 -13.121   1.203  1.00  0.00      5S   
ATOM   2606 C    GLY   120       7.957 -12.130   0.042  1.00  1.00      5S   
ATOM   2607 O    GLY   120       8.430 -13.094  -0.557  1.00  1.00      5S   
ATOM   2608 N    LEU   121       8.657 -10.984   0.200  1.00  1.00      5S   
ATOM   2609 HN   LEU   121       8.299 -10.196   0.696  1.00  0.00      5S   
ATOM   2610 CA   LEU   121       9.975 -10.833  -0.361  1.00  1.00      5S   
ATOM   2611 HA   LEU   121       9.976 -11.296  -1.330  1.00  0.00      5S   
ATOM   2612 CB   LEU   121      10.378  -9.357  -0.522  1.00  1.00      5S   
ATOM   2613 HB1  LEU   121      11.476  -9.290  -0.696  1.00  0.00      5S   
ATOM   2614 HB2  LEU   121      10.141  -8.815   0.420  1.00  0.00      5S   
ATOM   2615 CG   LEU   121       9.702  -8.621  -1.695  1.00  1.00      5S   
ATOM   2616 HG   LEU   121       8.610  -8.537  -1.486  1.00  0.00      5S   
ATOM   2617 CD1  LEU   121      10.285  -7.203  -1.795  1.00  1.00      5S   
ATOM   2618 HD11 LEU   121      11.336  -7.248  -2.150  1.00  0.00      5S   
ATOM   2619 HD12 LEU   121      10.267  -6.707  -0.803  1.00  0.00      5S   
ATOM   2620 HD13 LEU   121       9.688  -6.600  -2.506  1.00  0.00      5S   
ATOM   2621 CD2  LEU   121       9.875  -9.366  -3.029  1.00  1.00      5S   
ATOM   2622 HD21 LEU   121       9.272 -10.299  -3.032  1.00  0.00      5S   
ATOM   2623 HD22 LEU   121      10.945  -9.630  -3.172  1.00  0.00      5S   
ATOM   2624 HD23 LEU   121       9.542  -8.731  -3.875  1.00  0.00      5S   
ATOM   2625 C    LEU   121      11.000 -11.496   0.526  1.00  1.00      5S   
ATOM   2626 O    LEU   121      10.999 -11.242   1.732  1.00  1.00      5S   
ATOM   2627 N    PRO   122      11.909 -12.329   0.004  1.00  1.00      5S   
ATOM   2628 CD   PRO   122      11.866 -12.910  -1.341  1.00  1.00      5S   
ATOM   2629 HD1  PRO   122      12.342 -12.204  -2.055  1.00  0.00      5S   
ATOM   2630 HD2  PRO   122      10.826 -13.137  -1.661  1.00  0.00      5S   
ATOM   2631 CA   PRO   122      13.003 -12.864   0.790  1.00  1.00      5S   
ATOM   2632 HA   PRO   122      12.618 -13.277   1.712  1.00  0.00      5S   
ATOM   2633 CB   PRO   122      13.679 -13.913  -0.116  1.00  1.00      5S   
ATOM   2634 HB1  PRO   122      13.908 -14.839   0.450  1.00  0.00      5S   
ATOM   2635 HB2  PRO   122      14.616 -13.524  -0.572  1.00  0.00      5S   
ATOM   2636 CG   PRO   122      12.671 -14.200  -1.235  1.00  1.00      5S   
ATOM   2637 HG1  PRO   122      13.172 -14.458  -2.189  1.00  0.00      5S   
ATOM   2638 HG2  PRO   122      11.996 -15.028  -0.927  1.00  0.00      5S   
ATOM   2639 C    PRO   122      13.962 -11.758   1.114  1.00  1.00      5S   
ATOM   2640 O    PRO   122      14.000 -10.758   0.397  1.00  1.00      5S   
ATOM   2641 N    TYR   123      14.755 -11.925   2.190  1.00  1.00      5S   
ATOM   2642 HN   TYR   123      14.680 -12.736   2.766  1.00  0.00      5S   
ATOM   2643 CA   TYR   123      15.729 -10.946   2.595  1.00  1.00      5S   
ATOM   2644 HA   TYR   123      15.205 -10.012   2.751  1.00  0.00      5S   
ATOM   2645 CB   TYR   123      16.425 -11.383   3.906  1.00  1.00      5S   
ATOM   2646 HB1  TYR   123      16.920 -12.366   3.759  1.00  0.00      5S   
ATOM   2647 HB2  TYR   123      15.666 -11.488   4.711  1.00  0.00      5S   
ATOM   2648 CG   TYR   123      17.460 -10.400   4.371  1.00  1.00      5S   
ATOM   2649 CD1  TYR   123      17.083  -9.300   5.146  1.00  1.00      5S   
ATOM   2650 HD1  TYR   123      16.050  -9.165   5.430  1.00  0.00      5S   
ATOM   2651 CE1  TYR   123      18.042  -8.382   5.573  1.00  1.00      5S   
ATOM   2652 HE1  TYR   123      17.728  -7.536   6.152  1.00  0.00      5S   
ATOM   2653 CZ   TYR   123      19.386  -8.544   5.223  1.00  1.00      5S   
ATOM   2654 OH   TYR   123      20.335  -7.597   5.655  1.00  1.00      5S   
ATOM   2655 HH   TYR   123      19.868  -6.950   6.190  1.00  0.00      5S   
ATOM   2656 CD2  TYR   123      18.811 -10.561   4.017  1.00  1.00      5S   
ATOM   2657 HD2  TYR   123      19.106 -11.397   3.401  1.00  0.00      5S   
ATOM   2658 CE2  TYR   123      19.773  -9.637   4.441  1.00  1.00      5S   
ATOM   2659 HE2  TYR   123      20.808  -9.769   4.163  1.00  0.00      5S   
ATOM   2660 C    TYR   123      16.747 -10.761   1.493  1.00  1.00      5S   
ATOM   2661 O    TYR   123      17.242 -11.731   0.920  1.00  1.00      5S   
ATOM   2662 N    GLY   124      17.047  -9.486   1.168  1.00  1.00      5S   
ATOM   2663 HN   GLY   124      16.633  -8.716   1.652  1.00  0.00      5S   
ATOM   2664 CA   GLY   124      18.030  -9.158   0.165  1.00  1.00      5S   
ATOM   2665 HA1  GLY   124      18.742  -9.967   0.091  1.00  0.00      5S   
ATOM   2666 HA2  GLY   124      18.486  -8.230   0.474  1.00  0.00      5S   
ATOM   2667 C    GLY   124      17.440  -8.942  -1.197  1.00  1.00      5S   
ATOM   2668 O    GLY   124      18.162  -8.539  -2.107  1.00  1.00      5S   
ATOM   2669 N    ALA   125      16.122  -9.195  -1.393  1.00  1.00      5S   
ATOM   2670 HN   ALA   125      15.538  -9.530  -0.655  1.00  0.00      5S   
ATOM   2671 CA   ALA   125      15.474  -9.051  -2.679  1.00  1.00      5S   
ATOM   2672 HA   ALA   125      16.010  -9.666  -3.390  1.00  0.00      5S   
ATOM   2673 CB   ALA   125      14.007  -9.510  -2.623  1.00  1.00      5S   
ATOM   2674 HB1  ALA   125      13.447  -8.913  -1.872  1.00  0.00      5S   
ATOM   2675 HB2  ALA   125      13.961 -10.577  -2.319  1.00  0.00      5S   
ATOM   2676 HB3  ALA   125      13.513  -9.403  -3.611  1.00  0.00      5S   
ATOM   2677 C    ALA   125      15.500  -7.621  -3.163  1.00  1.00      5S   
ATOM   2678 O    ALA   125      15.232  -6.684  -2.417  1.00  1.00      5S   
ATOM   2679 N    ASN   126      15.857  -7.418  -4.447  1.00  1.00      5S   
ATOM   2680 HN   ASN   126      16.062  -8.176  -5.059  1.00  0.00      5S   
ATOM   2681 CA   ASN   126      16.010  -6.096  -5.001  1.00  1.00      5S   
ATOM   2682 HA   ASN   126      16.404  -5.438  -4.236  1.00  0.00      5S   
ATOM   2683 CB   ASN   126      16.983  -6.104  -6.207  1.00  1.00      5S   
ATOM   2684 HB1  ASN   126      16.648  -6.865  -6.943  1.00  0.00      5S   
ATOM   2685 HB2  ASN   126      17.993  -6.392  -5.846  1.00  0.00      5S   
ATOM   2686 CG   ASN   126      17.088  -4.727  -6.881  1.00  1.00      5S   
ATOM   2687 OD1  ASN   126      17.758  -3.818  -6.382  1.00  1.00      5S   
ATOM   2688 ND2  ASN   126      16.363  -4.584  -8.029  1.00  1.00      5S   
ATOM   2689 HD21 ASN   126      16.356  -3.705  -8.502  1.00  0.00      5S   
ATOM   2690 HD22 ASN   126      15.804  -5.345  -8.356  1.00  0.00      5S   
ATOM   2691 C    ASN   126      14.659  -5.589  -5.427  1.00  1.00      5S   
ATOM   2692 O    ASN   126      13.941  -6.244  -6.181  1.00  1.00      5S   
ATOM   2693 N    LYS   127      14.319  -4.378  -4.948  1.00  1.00      5S   
ATOM   2694 HN   LYS   127      14.909  -3.857  -4.335  1.00  0.00      5S   
ATOM   2695 CA   LYS   127      13.100  -3.733  -5.303  1.00  1.00      5S   
ATOM   2696 HA   LYS   127      12.983  -3.765  -6.383  1.00  0.00      5S   
ATOM   2697 CB   LYS   127      11.882  -4.361  -4.602  1.00  1.00      5S   
ATOM   2698 HB1  LYS   127      11.946  -4.177  -3.509  1.00  0.00      5S   
ATOM   2699 HB2  LYS   127      11.932  -5.462  -4.760  1.00  0.00      5S   
ATOM   2700 CG   LYS   127      10.523  -3.888  -5.121  1.00  1.00      5S   
ATOM   2701 HG1  LYS   127      10.523  -3.913  -6.235  1.00  0.00      5S   
ATOM   2702 HG2  LYS   127      10.344  -2.839  -4.799  1.00  0.00      5S   
ATOM   2703 CD   LYS   127       9.395  -4.788  -4.603  1.00  1.00      5S   
ATOM   2704 HD1  LYS   127       9.344  -4.689  -3.496  1.00  0.00      5S   
ATOM   2705 HD2  LYS   127       9.648  -5.846  -4.845  1.00  0.00      5S   
ATOM   2706 CE   LYS   127       8.044  -4.431  -5.221  1.00  1.00      5S   
ATOM   2707 HE1  LYS   127       8.102  -4.523  -6.327  1.00  0.00      5S   
ATOM   2708 HE2  LYS   127       7.769  -3.391  -4.948  1.00  0.00      5S   
ATOM   2709 NZ   LYS   127       6.971  -5.331  -4.743  1.00  1.00      5S   
ATOM   2710 HZ1  LYS   127       6.883  -5.259  -3.704  1.00  0.00      5S   
ATOM   2711 HZ2  LYS   127       7.194  -6.314  -4.999  1.00  0.00      5S   
ATOM   2712 HZ3  LYS   127       6.072  -5.054  -5.185  1.00  0.00      5S   
ATOM   2713 C    LYS   127      13.275  -2.321  -4.842  1.00  1.00      5S   
ATOM   2714 O    LYS   127      13.764  -2.036  -3.754  1.00  1.00      5S   
ATOM   2715 N    ASP   128      12.821  -1.413  -5.735  1.00  1.00      5S   
ATOM   2716 HN   ASP   128      12.431  -1.729  -6.598  1.00  0.00      5S   
ATOM   2717 CA   ASP   128      12.876   0.023  -5.639  1.00  1.00      5S   
ATOM   2718 HA   ASP   128      13.898   0.284  -5.401  1.00  0.00      5S   
ATOM   2719 CB   ASP   128      12.457   0.767  -6.954  1.00  1.00      5S   
ATOM   2720 HB1  ASP   128      13.266   1.469  -7.243  1.00  0.00      5S   
ATOM   2721 HB2  ASP   128      11.533   1.367  -6.799  1.00  0.00      5S   
ATOM   2722 CG   ASP   128      12.199  -0.177  -8.138  1.00  0.00      5S   
ATOM   2723 OD1  ASP   128      11.039  -0.225  -8.610  1.00  0.00      5S   
ATOM   2724 OD2  ASP   128      13.167  -0.862  -8.580  1.00  0.00      5S   
ATOM   2725 C    ASP   128      11.985   0.453  -4.505  1.00  1.00      5S   
ATOM   2726 O    ASP   128      10.830   0.035  -4.414  1.00  1.00      5S   
ATOM   2727 N    GLY   129      12.530   1.277  -3.583  1.00  1.00      5S   
ATOM   2728 HN   GLY   129      13.435   1.674  -3.721  1.00  0.00      5S   
ATOM   2729 CA   GLY   129      11.813   1.683  -2.405  1.00  1.00      5S   
ATOM   2730 HA1  GLY   129      10.765   1.779  -2.656  1.00  0.00      5S   
ATOM   2731 HA2  GLY   129      12.253   2.611  -2.078  1.00  0.00      5S   
ATOM   2732 C    GLY   129      11.934   0.700  -1.279  1.00  1.00      5S   
ATOM   2733 O    GLY   129      11.301   0.909  -0.252  1.00  1.00      5S   
ATOM   2734 N    ILE   130      12.725  -0.390  -1.429  1.00  1.00      5S   
ATOM   2735 HN   ILE   130      13.210  -0.572  -2.283  1.00  0.00      5S   
ATOM   2736 CA   ILE   130      12.897  -1.392  -0.402  1.00  1.00      5S   
ATOM   2737 HA   ILE   130      12.473  -1.038   0.519  1.00  0.00      5S   
ATOM   2738 CB   ILE   130      12.271  -2.742  -0.746  1.00  1.00      5S   
ATOM   2739 HB   ILE   130      12.696  -3.109  -1.707  1.00  0.00      5S   
ATOM   2740 CG2  ILE   130      12.583  -3.783   0.353  1.00  1.00      5S   
ATOM   2741 HG21 ILE   130      12.333  -3.370   1.352  1.00  0.00      5S   
ATOM   2742 HG22 ILE   130      13.656  -4.063   0.345  1.00  0.00      5S   
ATOM   2743 HG23 ILE   130      11.979  -4.700   0.188  1.00  0.00      5S   
ATOM   2744 CG1  ILE   130      10.747  -2.602  -0.945  1.00  1.00      5S   
ATOM   2745 HG11 ILE   130      10.342  -3.566  -1.323  1.00  0.00      5S   
ATOM   2746 HG12 ILE   130      10.539  -1.822  -1.710  1.00  0.00      5S   
ATOM   2747 CD   ILE   130      10.016  -2.244   0.344  1.00  1.00      5S   
ATOM   2748 HD1  ILE   130      10.399  -1.290   0.745  1.00  0.00      5S   
ATOM   2749 HD2  ILE   130      10.159  -3.027   1.114  1.00  0.00      5S   
ATOM   2750 HD3  ILE   130       8.929  -2.141   0.154  1.00  0.00      5S   
ATOM   2751 C    ILE   130      14.368  -1.561  -0.179  1.00  1.00      5S   
ATOM   2752 O    ILE   130      15.095  -2.000  -1.068  1.00  1.00      5S   
ATOM   2753 N    ILE   131      14.842  -1.224   1.042  1.00  1.00      5S   
ATOM   2754 HN   ILE   131      14.260  -0.789   1.727  1.00  0.00      5S   
ATOM   2755 CA   ILE   131      16.194  -1.515   1.452  1.00  1.00      5S   
ATOM   2756 HA   ILE   131      16.730  -1.997   0.646  1.00  0.00      5S   
ATOM   2757 CB   ILE   131      16.964  -0.277   1.874  1.00  1.00      5S   
ATOM   2758 HB   ILE   131      18.031  -0.552   2.039  1.00  0.00      5S   
ATOM   2759 CG2  ILE   131      16.892   0.759   0.735  1.00  1.00      5S   
ATOM   2760 HG21 ILE   131      15.925   1.306   0.773  1.00  0.00      5S   
ATOM   2761 HG22 ILE   131      16.995   0.282  -0.259  1.00  0.00      5S   
ATOM   2762 HG23 ILE   131      17.707   1.495   0.854  1.00  0.00      5S   
ATOM   2763 CG1  ILE   131      16.398   0.343   3.160  1.00  1.00      5S   
ATOM   2764 HG11 ILE   131      16.009  -0.425   3.855  1.00  0.00      5S   
ATOM   2765 HG12 ILE   131      15.545   1.006   2.892  1.00  0.00      5S   
ATOM   2766 CD   ILE   131      17.430   1.117   3.953  1.00  1.00      5S   
ATOM   2767 HD1  ILE   131      17.805   1.960   3.343  1.00  0.00      5S   
ATOM   2768 HD2  ILE   131      18.278   0.455   4.232  1.00  0.00      5S   
ATOM   2769 HD3  ILE   131      16.962   1.512   4.880  1.00  0.00      5S   
ATOM   2770 C    ILE   131      16.119  -2.504   2.584  1.00  1.00      5S   
ATOM   2771 O    ILE   131      15.133  -2.542   3.314  1.00  1.00      5S   
ATOM   2772 N    TRP   132      17.164  -3.334   2.761  1.00  1.00      5S   
ATOM   2773 HN   TRP   132      17.966  -3.291   2.172  1.00  0.00      5S   
ATOM   2774 CA   TRP   132      17.159  -4.383   3.754  1.00  1.00      5S   
ATOM   2775 HA   TRP   132      16.190  -4.452   4.229  1.00  0.00      5S   
ATOM   2776 CB   TRP   132      17.495  -5.749   3.135  1.00  1.00      5S   
ATOM   2777 HB1  TRP   132      17.622  -6.509   3.927  1.00  0.00      5S   
ATOM   2778 HB2  TRP   132      18.445  -5.668   2.562  1.00  0.00      5S   
ATOM   2779 CG   TRP   132      16.412  -6.221   2.203  1.00  1.00      5S   
ATOM   2780 CD1  TRP   132      16.348  -6.037   0.855  1.00  1.00      5S   
ATOM   2781 HD1  TRP   132      17.109  -5.552   0.262  1.00  0.00      5S   
ATOM   2782 NE1  TRP   132      15.187  -6.571   0.363  1.00  1.00      5S   
ATOM   2783 HE1  TRP   132      14.938  -6.598  -0.584  1.00  0.00      5S   
ATOM   2784 CE2  TRP   132      14.471  -7.117   1.394  1.00  1.00      5S   
ATOM   2785 CD2  TRP   132      15.206  -6.915   2.577  1.00  1.00      5S   
ATOM   2786 CE3  TRP   132      14.722  -7.363   3.800  1.00  1.00      5S   
ATOM   2787 HE3  TRP   132      15.254  -7.200   4.720  1.00  0.00      5S   
ATOM   2788 CZ3  TRP   132      13.477  -8.011   3.821  1.00  1.00      5S   
ATOM   2789 HZ3  TRP   132      13.062  -8.337   4.763  1.00  0.00      5S   
ATOM   2790 CZ2  TRP   132      13.248  -7.769   1.409  1.00  1.00      5S   
ATOM   2791 HZ2  TRP   132      12.691  -7.933   0.503  1.00  0.00      5S   
ATOM   2792 CH2  TRP   132      12.752  -8.216   2.639  1.00  1.00      5S   
ATOM   2793 HH2  TRP   132      11.798  -8.723   2.673  1.00  0.00      5S   
ATOM   2794 C    TRP   132      18.164  -4.090   4.822  1.00  1.00      5S   
ATOM   2795 O    TRP   132      19.245  -3.565   4.559  1.00  1.00      5S   
ATOM   2796 N    VAL   133      17.797  -4.433   6.076  1.00  1.00      5S   
ATOM   2797 HN   VAL   133      16.900  -4.837   6.258  1.00  0.00      5S   
ATOM   2798 CA   VAL   133      18.627  -4.225   7.236  1.00  1.00      5S   
ATOM   2799 HA   VAL   133      19.653  -4.097   6.922  1.00  0.00      5S   
ATOM   2800 CB   VAL   133      18.193  -3.032   8.076  1.00  1.00      5S   
ATOM   2801 HB   VAL   133      18.821  -2.966   8.995  1.00  0.00      5S   
ATOM   2802 CG1  VAL   133      18.394  -1.746   7.258  1.00  1.00      5S   
ATOM   2803 HG11 VAL   133      17.782  -1.766   6.332  1.00  0.00      5S   
ATOM   2804 HG12 VAL   133      19.461  -1.628   6.979  1.00  0.00      5S   
ATOM   2805 HG13 VAL   133      18.074  -0.866   7.853  1.00  0.00      5S   
ATOM   2806 CG2  VAL   133      16.721  -3.162   8.495  1.00  1.00      5S   
ATOM   2807 HG21 VAL   133      16.523  -4.141   8.975  1.00  0.00      5S   
ATOM   2808 HG22 VAL   133      16.054  -3.053   7.613  1.00  0.00      5S   
ATOM   2809 HG23 VAL   133      16.470  -2.371   9.230  1.00  0.00      5S   
ATOM   2810 C    VAL   133      18.574  -5.473   8.074  1.00  1.00      5S   
ATOM   2811 O    VAL   133      17.596  -6.217   8.052  1.00  1.00      5S   
ATOM   2812 N    ALA   134      19.651  -5.733   8.841  1.00  1.00      5S   
ATOM   2813 HN   ALA   134      20.429  -5.113   8.877  1.00  0.00      5S   
ATOM   2814 CA   ALA   134      19.725  -6.904   9.672  1.00  1.00      5S   
ATOM   2815 HA   ALA   134      18.825  -6.961  10.265  1.00  0.00      5S   
ATOM   2816 CB   ALA   134      19.924  -8.204   8.871  1.00  1.00      5S   
ATOM   2817 HB1  ALA   134      20.914  -8.223   8.369  1.00  0.00      5S   
ATOM   2818 HB2  ALA   134      19.153  -8.262   8.078  1.00  0.00      5S   
ATOM   2819 HB3  ALA   134      19.818  -9.098   9.520  1.00  0.00      5S   
ATOM   2820 C    ALA   134      20.890  -6.740  10.595  1.00  1.00      5S   
ATOM   2821 O    ALA   134      21.977  -6.371  10.164  1.00  1.00      5S   
ATOM   2822 N    THR   135      20.676  -7.015  11.897  1.00  1.00      5S   
ATOM   2823 HN   THR   135      19.765  -7.272  12.220  1.00  0.00      5S   
ATOM   2824 CA   THR   135      21.683  -6.940  12.930  1.00  1.00      5S   
ATOM   2825 HA   THR   135      22.406  -6.183  12.663  1.00  0.00      5S   
ATOM   2826 CB   THR   135      21.080  -6.606  14.286  1.00  1.00      5S   
ATOM   2827 HB   THR   135      20.500  -7.473  14.672  1.00  0.00      5S   
ATOM   2828 OG1  THR   135      20.208  -5.493  14.150  1.00  1.00      5S   
ATOM   2829 HG1  THR   135      19.800  -5.364  15.009  1.00  0.00      5S   
ATOM   2830 CG2  THR   135      22.149  -6.225  15.321  1.00  1.00      5S   
ATOM   2831 HG21 THR   135      22.826  -5.453  14.899  1.00  0.00      5S   
ATOM   2832 HG22 THR   135      22.744  -7.115  15.612  1.00  0.00      5S   
ATOM   2833 HG23 THR   135      21.670  -5.822  16.238  1.00  0.00      5S   
ATOM   2834 C    THR   135      22.373  -8.273  12.990  1.00  1.00      5S   
ATOM   2835 O    THR   135      21.806  -9.298  12.611  1.00  1.00      5S   
ATOM   2836 N    GLU   136      23.634  -8.275  13.475  1.00  1.00      5S   
ATOM   2837 HN   GLU   136      24.069  -7.421  13.752  1.00  0.00      5S   
ATOM   2838 CA   GLU   136      24.451  -9.446  13.658  1.00  1.00      5S   
ATOM   2839 HA   GLU   136      24.655  -9.853  12.678  1.00  0.00      5S   
ATOM   2840 CB   GLU   136      25.780  -9.052  14.343  1.00  1.00      5S   
ATOM   2841 HB1  GLU   136      25.547  -8.612  15.340  1.00  0.00      5S   
ATOM   2842 HB2  GLU   136      26.266  -8.252  13.739  1.00  0.00      5S   
ATOM   2843 CG   GLU   136      26.784 -10.200  14.548  1.00  1.00      5S   
ATOM   2844 HG1  GLU   136      26.306 -11.034  15.101  1.00  0.00      5S   
ATOM   2845 HG2  GLU   136      27.637  -9.823  15.153  1.00  0.00      5S   
ATOM   2846 CD   GLU   136      27.311 -10.711  13.210  1.00  1.00      5S   
ATOM   2847 OE1  GLU   136      26.651 -11.601  12.610  1.00  1.00      5S   
ATOM   2848 OE2  GLU   136      28.386 -10.220  12.774  1.00  1.00      5S   
ATOM   2849 C    GLU   136      23.748 -10.497  14.490  1.00  1.00      5S   
ATOM   2850 O    GLU   136      23.408 -10.268  15.650  1.00  1.00      5S   
ATOM   2851 N    GLY   137      23.494 -11.674  13.873  1.00  1.00      5S   
ATOM   2852 HN   GLY   137      23.770 -11.820  12.925  1.00  0.00      5S   
ATOM   2853 CA   GLY   137      22.918 -12.809  14.557  1.00  1.00      5S   
ATOM   2854 HA1  GLY   137      23.104 -12.706  15.617  1.00  0.00      5S   
ATOM   2855 HA2  GLY   137      23.380 -13.690  14.140  1.00  0.00      5S   
ATOM   2856 C    GLY   137      21.434 -12.942  14.380  1.00  1.00      5S   
ATOM   2857 O    GLY   137      20.780 -13.561  15.217  1.00  1.00      5S   
ATOM   2858 N    ALA   138      20.848 -12.390  13.293  1.00  1.00      5S   
ATOM   2859 HN   ALA   138      21.363 -11.885  12.604  1.00  0.00      5S   
ATOM   2860 CA   ALA   138      19.424 -12.477  13.081  1.00  1.00      5S   
ATOM   2861 HA   ALA   138      18.924 -12.638  14.025  1.00  0.00      5S   
ATOM   2862 CB   ALA   138      18.854 -11.195  12.469  1.00  1.00      5S   
ATOM   2863 HB1  ALA   138      19.333 -10.978  11.490  1.00  0.00      5S   
ATOM   2864 HB2  ALA   138      19.056 -10.340  13.150  1.00  0.00      5S   
ATOM   2865 HB3  ALA   138      17.755 -11.274  12.328  1.00  0.00      5S   
ATOM   2866 C    ALA   138      19.105 -13.635  12.179  1.00  1.00      5S   
ATOM   2867 O    ALA   138      19.865 -13.968  11.271  1.00  1.00      5S   
ATOM   2868 N    LEU   139      17.949 -14.288  12.428  1.00  1.00      5S   
ATOM   2869 HN   LEU   139      17.346 -14.018  13.177  1.00  0.00      5S   
ATOM   2870 CA   LEU   139      17.523 -15.430  11.663  1.00  1.00      5S   
ATOM   2871 HA   LEU   139      18.390 -15.955  11.289  1.00  0.00      5S   
ATOM   2872 CB   LEU   139      16.647 -16.389  12.491  1.00  1.00      5S   
ATOM   2873 HB1  LEU   139      16.208 -17.164  11.825  1.00  0.00      5S   
ATOM   2874 HB2  LEU   139      15.813 -15.815  12.952  1.00  0.00      5S   
ATOM   2875 CG   LEU   139      17.404 -17.128  13.610  1.00  1.00      5S   
ATOM   2876 HG   LEU   139      17.788 -16.375  14.335  1.00  0.00      5S   
ATOM   2877 CD1  LEU   139      16.442 -18.066  14.355  1.00  1.00      5S   
ATOM   2878 HD11 LEU   139      16.030 -18.818  13.650  1.00  0.00      5S   
ATOM   2879 HD12 LEU   139      15.600 -17.489  14.791  1.00  0.00      5S   
ATOM   2880 HD13 LEU   139      16.974 -18.595  15.174  1.00  0.00      5S   
ATOM   2881 CD2  LEU   139      18.617 -17.903  13.075  1.00  1.00      5S   
ATOM   2882 HD21 LEU   139      19.408 -17.196  12.747  1.00  0.00      5S   
ATOM   2883 HD22 LEU   139      18.315 -18.531  12.212  1.00  0.00      5S   
ATOM   2884 HD23 LEU   139      19.037 -18.553  13.870  1.00  0.00      5S   
ATOM   2885 C    LEU   139      16.721 -14.978  10.483  1.00  1.00      5S   
ATOM   2886 O    LEU   139      15.905 -14.066  10.582  1.00  1.00      5S   
ATOM   2887 N    ASN   140      16.934 -15.639   9.325  1.00  1.00      5S   
ATOM   2888 HN   ASN   140      17.602 -16.378   9.274  1.00  0.00      5S   
ATOM   2889 CA   ASN   140      16.282 -15.309   8.081  1.00  1.00      5S   
ATOM   2890 HA   ASN   140      16.087 -14.245   8.065  1.00  0.00      5S   
ATOM   2891 CB   ASN   140      17.207 -15.677   6.901  1.00  1.00      5S   
ATOM   2892 HB1  ASN   140      17.269 -16.780   6.782  1.00  0.00      5S   
ATOM   2893 HB2  ASN   140      18.229 -15.301   7.130  1.00  0.00      5S   
ATOM   2894 CG   ASN   140      16.741 -15.045   5.586  1.00  1.00      5S   
ATOM   2895 OD1  ASN   140      15.571 -14.718   5.368  1.00  1.00      5S   
ATOM   2896 ND2  ASN   140      17.725 -14.880   4.663  1.00  1.00      5S   
ATOM   2897 HD21 ASN   140      17.461 -14.635   3.727  1.00  0.00      5S   
ATOM   2898 HD22 ASN   140      18.679 -15.056   4.899  1.00  0.00      5S   
ATOM   2899 C    ASN   140      14.963 -16.045   7.994  1.00  1.00      5S   
ATOM   2900 O    ASN   140      14.744 -16.879   7.115  1.00  1.00      5S   
ATOM   2901 N    THR   141      14.047 -15.737   8.934  1.00  1.00      5S   
ATOM   2902 HN   THR   141      14.262 -15.076   9.650  1.00  0.00      5S   
ATOM   2903 CA   THR   141      12.763 -16.384   9.023  1.00  1.00      5S   
ATOM   2904 HA   THR   141      12.618 -16.978   8.134  1.00  0.00      5S   
ATOM   2905 CB   THR   141      12.633 -17.265  10.265  1.00  1.00      5S   
ATOM   2906 HB   THR   141      11.641 -17.770  10.263  1.00  0.00      5S   
ATOM   2907 OG1  THR   141      12.764 -16.519  11.472  1.00  1.00      5S   
ATOM   2908 HG1  THR   141      12.484 -17.107  12.177  1.00  0.00      5S   
ATOM   2909 CG2  THR   141      13.731 -18.343  10.248  1.00  1.00      5S   
ATOM   2910 HG21 THR   141      14.741 -17.881  10.273  1.00  0.00      5S   
ATOM   2911 HG22 THR   141      13.650 -18.965   9.333  1.00  0.00      5S   
ATOM   2912 HG23 THR   141      13.630 -19.000  11.137  1.00  0.00      5S   
ATOM   2913 C    THR   141      11.695 -15.320   9.057  1.00  1.00      5S   
ATOM   2914 O    THR   141      11.959 -14.227   9.551  1.00  1.00      5S   
ATOM   2915 N    PRO   142      10.477 -15.566   8.593  1.00  1.00      5S   
ATOM   2916 CD   PRO   142      10.064 -16.789   7.901  1.00  1.00      5S   
ATOM   2917 HD1  PRO   142      10.449 -17.701   8.406  1.00  0.00      5S   
ATOM   2918 HD2  PRO   142      10.427 -16.751   6.851  1.00  0.00      5S   
ATOM   2919 CA   PRO   142       9.387 -14.616   8.719  1.00  1.00      5S   
ATOM   2920 HA   PRO   142       9.695 -13.662   8.313  1.00  0.00      5S   
ATOM   2921 CB   PRO   142       8.227 -15.252   7.942  1.00  1.00      5S   
ATOM   2922 HB1  PRO   142       8.237 -14.882   6.894  1.00  0.00      5S   
ATOM   2923 HB2  PRO   142       7.235 -15.042   8.390  1.00  0.00      5S   
ATOM   2924 CG   PRO   142       8.540 -16.751   7.945  1.00  1.00      5S   
ATOM   2925 HG1  PRO   142       8.190 -17.194   8.903  1.00  0.00      5S   
ATOM   2926 HG2  PRO   142       8.074 -17.280   7.091  1.00  0.00      5S   
ATOM   2927 C    PRO   142       9.000 -14.416  10.164  1.00  1.00      5S   
ATOM   2928 O    PRO   142       8.815 -15.388  10.896  1.00  1.00      5S   
ATOM   2929 N    LYS   143       8.884 -13.143  10.587  1.00  1.00      5S   
ATOM   2930 HN   LYS   143       9.102 -12.382   9.974  1.00  0.00      5S   
ATOM   2931 CA   LYS   143       8.555 -12.769  11.937  1.00  1.00      5S   
ATOM   2932 HA   LYS   143       8.860 -13.563  12.604  1.00  0.00      5S   
ATOM   2933 CB   LYS   143       9.249 -11.457  12.365  1.00  1.00      5S   
ATOM   2934 HB1  LYS   143       9.134 -11.329  13.465  1.00  0.00      5S   
ATOM   2935 HB2  LYS   143       8.780 -10.587  11.853  1.00  0.00      5S   
ATOM   2936 CG   LYS   143      10.745 -11.443  12.028  1.00  1.00      5S   
ATOM   2937 HG1  LYS   143      11.210 -10.528  12.457  1.00  0.00      5S   
ATOM   2938 HG2  LYS   143      10.873 -11.392  10.924  1.00  0.00      5S   
ATOM   2939 CD   LYS   143      11.479 -12.679  12.558  1.00  1.00      5S   
ATOM   2940 HD1  LYS   143      11.000 -13.602  12.161  1.00  0.00      5S   
ATOM   2941 HD2  LYS   143      11.399 -12.698  13.667  1.00  0.00      5S   
ATOM   2942 CE   LYS   143      12.933 -12.699  12.115  1.00  1.00      5S   
ATOM   2943 HE1  LYS   143      13.473 -11.830  12.538  1.00  0.00      5S   
ATOM   2944 HE2  LYS   143      13.013 -12.657  11.010  1.00  0.00      5S   
ATOM   2945 NZ   LYS   143      13.589 -13.936  12.573  1.00  1.00      5S   
ATOM   2946 HZ1  LYS   143      13.128 -14.778  12.167  1.00  0.00      5S   
ATOM   2947 HZ2  LYS   143      13.558 -13.976  13.613  1.00  0.00      5S   
ATOM   2948 HZ3  LYS   143      14.587 -13.907  12.273  1.00  0.00      5S   
ATOM   2949 C    LYS   143       7.072 -12.626  12.038  1.00  1.00      5S   
ATOM   2950 O    LYS   143       6.533 -11.539  12.239  1.00  1.00      5S   
ATOM   2951 N    ASP   144       6.367 -13.767  11.918  1.00  1.00      5S   
ATOM   2952 HN   ASP   144       6.823 -14.640  11.744  1.00  0.00      5S   
ATOM   2953 CA   ASP   144       4.928 -13.798  11.919  1.00  1.00      5S   
ATOM   2954 HA   ASP   144       4.574 -12.999  11.280  1.00  0.00      5S   
ATOM   2955 CB   ASP   144       4.388 -15.156  11.414  1.00  1.00      5S   
ATOM   2956 HB1  ASP   144       3.290 -15.214  11.576  1.00  0.00      5S   
ATOM   2957 HB2  ASP   144       4.880 -15.983  11.970  1.00  0.00      5S   
ATOM   2958 CG   ASP   144       4.655 -15.337   9.917  1.00  1.00      5S   
ATOM   2959 OD1  ASP   144       4.621 -14.324   9.170  1.00  1.00      5S   
ATOM   2960 OD2  ASP   144       4.882 -16.505   9.503  1.00  1.00      5S   
ATOM   2961 C    ASP   144       4.378 -13.527  13.299  1.00  1.00      5S   
ATOM   2962 O    ASP   144       3.257 -13.040  13.433  1.00  1.00      5S   
ATOM   2963 N    HSD   145       5.167 -13.793  14.367  1.00  1.00      5S   
ATOM   2964 HN   HSD   145       6.080 -14.179  14.256  1.00  0.00      5S   
ATOM   2965 CA   HSD   145       4.727 -13.565  15.726  1.00  1.00      5S   
ATOM   2966 HA   HSD   145       3.697 -13.883  15.792  1.00  0.00      5S   
ATOM   2967 CB   HSD   145       5.542 -14.399  16.738  1.00  1.00      5S   
ATOM   2968 HB1  HSD   145       5.504 -15.466  16.426  1.00  0.00      5S   
ATOM   2969 HB2  HSD   145       5.079 -14.324  17.745  1.00  0.00      5S   
ATOM   2970 ND1  HSD   145       7.998 -14.630  16.143  1.00  1.00      5S   
ATOM   2971 HD1  HSD   145       7.890 -15.405  15.519  1.00  0.00      5S   
ATOM   2972 CG   HSD   145       6.986 -14.011  16.845  1.00  1.00      5S   
ATOM   2973 CE1  HSD   145       9.150 -14.015  16.493  1.00  1.00      5S   
ATOM   2974 HE1  HSD   145      10.123 -14.315  16.105  1.00  0.00      5S   
ATOM   2975 NE2  HSD   145       8.946 -13.047  17.363  1.00  1.00      5S   
ATOM   2976 CD2  HSD   145       7.583 -13.044  17.588  1.00  1.00      5S   
ATOM   2977 HD2  HSD   145       7.151 -12.325  18.274  1.00  0.00      5S   
ATOM   2978 C    HSD   145       4.763 -12.104  16.127  1.00  1.00      5S   
ATOM   2979 O    HSD   145       4.232 -11.739  17.176  1.00  1.00      5S   
ATOM   2980 N    ILE   146       5.378 -11.230  15.297  1.00  1.00      5S   
ATOM   2981 HN   ILE   146       5.831 -11.546  14.464  1.00  0.00      5S   
ATOM   2982 CA   ILE   146       5.425  -9.805  15.532  1.00  1.00      5S   
ATOM   2983 HA   ILE   146       5.192  -9.605  16.568  1.00  0.00      5S   
ATOM   2984 CB   ILE   146       6.805  -9.239  15.227  1.00  1.00      5S   
ATOM   2985 HB   ILE   146       7.135  -9.586  14.221  1.00  0.00      5S   
ATOM   2986 CG2  ILE   146       6.782  -7.697  15.233  1.00  1.00      5S   
ATOM   2987 HG21 ILE   146       6.446  -7.321  16.222  1.00  0.00      5S   
ATOM   2988 HG22 ILE   146       6.113  -7.303  14.444  1.00  0.00      5S   
ATOM   2989 HG23 ILE   146       7.793  -7.297  15.024  1.00  0.00      5S   
ATOM   2990 CG1  ILE   146       7.813  -9.781  16.263  1.00  1.00      5S   
ATOM   2991 HG11 ILE   146       7.868 -10.886  16.166  1.00  0.00      5S   
ATOM   2992 HG12 ILE   146       7.448  -9.544  17.288  1.00  0.00      5S   
ATOM   2993 CD   ILE   146       9.219  -9.208  16.093  1.00  1.00      5S   
ATOM   2994 HD1  ILE   146       9.249  -8.136  16.384  1.00  0.00      5S   
ATOM   2995 HD2  ILE   146       9.555  -9.306  15.039  1.00  0.00      5S   
ATOM   2996 HD3  ILE   146       9.927  -9.752  16.743  1.00  0.00      5S   
ATOM   2997 C    ILE   146       4.350  -9.128  14.719  1.00  1.00      5S   
ATOM   2998 O    ILE   146       3.555  -8.363  15.266  1.00  1.00      5S   
ATOM   2999 N    GLY   147       4.313  -9.381  13.388  1.00  1.00      5S   
ATOM   3000 HN   GLY   147       4.966 -10.008  12.970  1.00  0.00      5S   
ATOM   3001 CA   GLY   147       3.308  -8.844  12.495  1.00  1.00      5S   
ATOM   3002 HA1  GLY   147       2.336  -9.117  12.882  1.00  0.00      5S   
ATOM   3003 HA2  GLY   147       3.505  -9.256  11.518  1.00  0.00      5S   
ATOM   3004 C    GLY   147       3.365  -7.352  12.361  1.00  1.00      5S   
ATOM   3005 O    GLY   147       4.337  -6.702  12.734  1.00  1.00      5S   
ATOM   3006 N    THR   148       2.283  -6.780  11.803  1.00  1.00      5S   
ATOM   3007 HN   THR   148       1.534  -7.334  11.451  1.00  0.00      5S   
ATOM   3008 CA   THR   148       2.110  -5.358  11.638  1.00  1.00      5S   
ATOM   3009 HA   THR   148       3.080  -4.890  11.543  1.00  0.00      5S   
ATOM   3010 CB   THR   148       1.278  -5.049  10.400  1.00  1.00      5S   
ATOM   3011 HB   THR   148       1.066  -3.966  10.313  1.00  0.00      5S   
ATOM   3012 OG1  THR   148       0.035  -5.742  10.422  1.00  1.00      5S   
ATOM   3013 HG1  THR   148      -0.482  -5.331  11.120  1.00  0.00      5S   
ATOM   3014 CG2  THR   148       2.068  -5.483   9.150  1.00  1.00      5S   
ATOM   3015 HG21 THR   148       2.278  -6.573   9.169  1.00  0.00      5S   
ATOM   3016 HG22 THR   148       3.032  -4.935   9.090  1.00  0.00      5S   
ATOM   3017 HG23 THR   148       1.479  -5.259   8.235  1.00  0.00      5S   
ATOM   3018 C    THR   148       1.451  -4.796  12.877  1.00  1.00      5S   
ATOM   3019 O    THR   148       1.164  -5.517  13.832  1.00  1.00      5S   
ATOM   3020 N    ARG   149       1.210  -3.471  12.888  1.00  1.00      5S   
ATOM   3021 HN   ARG   149       1.441  -2.889  12.108  1.00  0.00      5S   
ATOM   3022 CA   ARG   149       0.615  -2.799  14.012  1.00  1.00      5S   
ATOM   3023 HA   ARG   149       0.548  -3.458  14.865  1.00  0.00      5S   
ATOM   3024 CB   ARG   149       1.437  -1.559  14.396  1.00  1.00      5S   
ATOM   3025 HB1  ARG   149       1.577  -0.924  13.495  1.00  0.00      5S   
ATOM   3026 HB2  ARG   149       2.445  -1.903  14.716  1.00  0.00      5S   
ATOM   3027 CG   ARG   149       0.844  -0.718  15.532  1.00  1.00      5S   
ATOM   3028 HG1  ARG   149       0.805  -1.336  16.455  1.00  0.00      5S   
ATOM   3029 HG2  ARG   149      -0.195  -0.411  15.283  1.00  0.00      5S   
ATOM   3030 CD   ARG   149       1.665   0.535  15.815  1.00  1.00      5S   
ATOM   3031 HD1  ARG   149       2.723   0.276  16.020  1.00  0.00      5S   
ATOM   3032 HD2  ARG   149       1.255   1.071  16.692  1.00  0.00      5S   
ATOM   3033 NE   ARG   149       1.628   1.417  14.606  1.00  1.00      5S   
ATOM   3034 HE   ARG   149       2.307   1.261  13.882  1.00  0.00      5S   
ATOM   3035 CZ   ARG   149       0.803   2.492  14.492  1.00  1.00      5S   
ATOM   3036 NH1  ARG   149      -0.118   2.769  15.442  1.00  1.00      5S   
ATOM   3037 HH11 ARG   149      -0.681   3.587  15.377  1.00  0.00      5S   
ATOM   3038 HH12 ARG   149      -0.268   2.105  16.180  1.00  0.00      5S   
ATOM   3039 NH2  ARG   149       0.910   3.319  13.425  1.00  1.00      5S   
ATOM   3040 HH21 ARG   149       1.439   3.010  12.632  1.00  0.00      5S   
ATOM   3041 HH22 ARG   149       0.308   4.109  13.347  1.00  0.00      5S   
ATOM   3042 C    ARG   149      -0.767  -2.375  13.626  1.00  1.00      5S   
ATOM   3043 O    ARG   149      -0.994  -1.921  12.507  1.00  1.00      5S   
ATOM   3044 N    ASN   150      -1.726  -2.513  14.571  1.00  1.00      5S   
ATOM   3045 HN   ASN   150      -1.531  -2.940  15.452  1.00  0.00      5S   
ATOM   3046 CA   ASN   150      -3.070  -2.027  14.401  1.00  1.00      5S   
ATOM   3047 HA   ASN   150      -3.289  -1.964  13.348  1.00  0.00      5S   
ATOM   3048 CB   ASN   150      -4.090  -2.988  15.054  1.00  1.00      5S   
ATOM   3049 HB1  ASN   150      -4.054  -2.922  16.160  1.00  0.00      5S   
ATOM   3050 HB2  ASN   150      -3.809  -4.025  14.764  1.00  0.00      5S   
ATOM   3051 CG   ASN   150      -5.518  -2.713  14.561  1.00  1.00      5S   
ATOM   3052 OD1  ASN   150      -5.860  -1.611  14.121  1.00  1.00      5S   
ATOM   3053 ND2  ASN   150      -6.371  -3.774  14.634  1.00  1.00      5S   
ATOM   3054 HD21 ASN   150      -7.286  -3.695  14.244  1.00  0.00      5S   
ATOM   3055 HD22 ASN   150      -6.090  -4.599  15.125  1.00  0.00      5S   
ATOM   3056 C    ASN   150      -3.142  -0.669  15.066  1.00  1.00      5S   
ATOM   3057 O    ASN   150      -3.034  -0.625  16.291  1.00  1.00      5S   
ATOM   3058 N    PRO   151      -3.344   0.451  14.360  1.00  1.00      5S   
ATOM   3059 CD   PRO   151      -3.296   0.530  12.896  1.00  1.00      5S   
ATOM   3060 HD1  PRO   151      -4.291   0.250  12.491  1.00  0.00      5S   
ATOM   3061 HD2  PRO   151      -2.516  -0.127  12.461  1.00  0.00      5S   
ATOM   3062 CA   PRO   151      -3.368   1.775  14.970  1.00  1.00      5S   
ATOM   3063 HA   PRO   151      -2.452   1.904  15.518  1.00  0.00      5S   
ATOM   3064 CB   PRO   151      -3.524   2.744  13.786  1.00  1.00      5S   
ATOM   3065 HB1  PRO   151      -2.973   3.691  13.952  1.00  0.00      5S   
ATOM   3066 HB2  PRO   151      -4.597   2.967  13.592  1.00  0.00      5S   
ATOM   3067 CG   PRO   151      -2.967   1.985  12.581  1.00  1.00      5S   
ATOM   3068 HG1  PRO   151      -3.425   2.320  11.628  1.00  0.00      5S   
ATOM   3069 HG2  PRO   151      -1.863   2.113  12.535  1.00  0.00      5S   
ATOM   3070 C    PRO   151      -4.493   1.967  15.951  1.00  1.00      5S   
ATOM   3071 O    PRO   151      -4.425   2.898  16.749  1.00  1.00      5S   
ATOM   3072 N    ALA   152      -5.522   1.095  15.921  1.00  1.00      5S   
ATOM   3073 HN   ALA   152      -5.564   0.363  15.242  1.00  0.00      5S   
ATOM   3074 CA   ALA   152      -6.627   1.171  16.838  1.00  1.00      5S   
ATOM   3075 HA   ALA   152      -6.872   2.213  16.988  1.00  0.00      5S   
ATOM   3076 CB   ALA   152      -7.854   0.447  16.260  1.00  1.00      5S   
ATOM   3077 HB1  ALA   152      -7.625  -0.621  16.059  1.00  0.00      5S   
ATOM   3078 HB2  ALA   152      -8.148   0.926  15.301  1.00  0.00      5S   
ATOM   3079 HB3  ALA   152      -8.715   0.509  16.959  1.00  0.00      5S   
ATOM   3080 C    ALA   152      -6.297   0.583  18.191  1.00  1.00      5S   
ATOM   3081 O    ALA   152      -6.985   0.878  19.166  1.00  1.00      5S   
ATOM   3082 N    ASN   153      -5.241  -0.261  18.289  1.00  1.00      5S   
ATOM   3083 HN   ASN   153      -4.674  -0.473  17.495  1.00  0.00      5S   
ATOM   3084 CA   ASN   153      -4.921  -0.969  19.512  1.00  1.00      5S   
ATOM   3085 HA   ASN   153      -5.655  -0.740  20.272  1.00  0.00      5S   
ATOM   3086 CB   ASN   153      -4.861  -2.500  19.301  1.00  1.00      5S   
ATOM   3087 HB1  ASN   153      -4.694  -3.012  20.272  1.00  0.00      5S   
ATOM   3088 HB2  ASN   153      -4.031  -2.758  18.608  1.00  0.00      5S   
ATOM   3089 CG   ASN   153      -6.168  -3.019  18.692  1.00  1.00      5S   
ATOM   3090 OD1  ASN   153      -6.164  -3.616  17.613  1.00  1.00      5S   
ATOM   3091 ND2  ASN   153      -7.306  -2.795  19.409  1.00  1.00      5S   
ATOM   3092 HD21 ASN   153      -8.180  -3.118  19.048  1.00  0.00      5S   
ATOM   3093 HD22 ASN   153      -7.258  -2.308  20.279  1.00  0.00      5S   
ATOM   3094 C    ASN   153      -3.596  -0.543  20.077  1.00  1.00      5S   
ATOM   3095 O    ASN   153      -3.423  -0.551  21.295  1.00  1.00      5S   
ATOM   3096 N    ASN   154      -2.617  -0.186  19.220  1.00  1.00      5S   
ATOM   3097 HN   ASN   154      -2.755  -0.167  18.230  1.00  0.00      5S   
ATOM   3098 CA   ASN   154      -1.297   0.164  19.684  1.00  1.00      5S   
ATOM   3099 HA   ASN   154      -1.326   0.470  20.720  1.00  0.00      5S   
ATOM   3100 CB   ASN   154      -0.267  -0.973  19.479  1.00  1.00      5S   
ATOM   3101 HB1  ASN   154       0.746  -0.641  19.790  1.00  0.00      5S   
ATOM   3102 HB2  ASN   154      -0.234  -1.269  18.408  1.00  0.00      5S   
ATOM   3103 CG   ASN   154      -0.650  -2.209  20.301  1.00  1.00      5S   
ATOM   3104 OD1  ASN   154      -0.845  -3.299  19.754  1.00  1.00      5S   
ATOM   3105 ND2  ASN   154      -0.746  -2.024  21.649  1.00  1.00      5S   
ATOM   3106 HD21 ASN   154      -0.899  -2.812  22.242  1.00  0.00      5S   
ATOM   3107 HD22 ASN   154      -0.741  -1.096  22.018  1.00  0.00      5S   
ATOM   3108 C    ASN   154      -0.845   1.342  18.889  1.00  1.00      5S   
ATOM   3109 O    ASN   154      -1.079   1.409  17.687  1.00  1.00      5S   
ATOM   3110 N    ALA   155      -0.169   2.306  19.552  1.00  1.00      5S   
ATOM   3111 HN   ALA   155      -0.035   2.275  20.539  1.00  0.00      5S   
ATOM   3112 CA   ALA   155       0.412   3.438  18.878  1.00  1.00      5S   
ATOM   3113 HA   ALA   155      -0.190   3.686  18.016  1.00  0.00      5S   
ATOM   3114 CB   ALA   155       0.495   4.678  19.782  1.00  1.00      5S   
ATOM   3115 HB1  ALA   155       1.109   4.468  20.683  1.00  0.00      5S   
ATOM   3116 HB2  ALA   155      -0.527   4.964  20.111  1.00  0.00      5S   
ATOM   3117 HB3  ALA   155       0.938   5.540  19.237  1.00  0.00      5S   
ATOM   3118 C    ALA   155       1.794   3.083  18.405  1.00  1.00      5S   
ATOM   3119 O    ALA   155       2.392   2.098  18.840  1.00  1.00      5S   
ATOM   3120 N    ALA   156       2.324   3.892  17.464  1.00  1.00      5S   
ATOM   3121 HN   ALA   156       1.817   4.668  17.098  1.00  0.00      5S   
ATOM   3122 CA   ALA   156       3.628   3.682  16.895  1.00  1.00      5S   
ATOM   3123 HA   ALA   156       3.709   2.641  16.613  1.00  0.00      5S   
ATOM   3124 CB   ALA   156       3.851   4.555  15.649  1.00  1.00      5S   
ATOM   3125 HB1  ALA   156       3.746   5.630  15.909  1.00  0.00      5S   
ATOM   3126 HB2  ALA   156       3.092   4.310  14.877  1.00  0.00      5S   
ATOM   3127 HB3  ALA   156       4.859   4.384  15.215  1.00  0.00      5S   
ATOM   3128 C    ALA   156       4.701   3.997  17.905  1.00  1.00      5S   
ATOM   3129 O    ALA   156       4.537   4.848  18.778  1.00  1.00      5S   
ATOM   3130 N    ILE   157       5.829   3.271  17.803  1.00  1.00      5S   
ATOM   3131 HN   ILE   157       5.907   2.546  17.118  1.00  0.00      5S   
ATOM   3132 CA   ILE   157       6.972   3.424  18.663  1.00  1.00      5S   
ATOM   3133 HA   ILE   157       6.671   3.879  19.596  1.00  0.00      5S   
ATOM   3134 CB   ILE   157       7.653   2.087  18.930  1.00  1.00      5S   
ATOM   3135 HB   ILE   157       7.959   1.630  17.960  1.00  0.00      5S   
ATOM   3136 CG2  ILE   157       8.913   2.275  19.803  1.00  1.00      5S   
ATOM   3137 HG21 ILE   157       8.639   2.744  20.772  1.00  0.00      5S   
ATOM   3138 HG22 ILE   157       9.661   2.913  19.292  1.00  0.00      5S   
ATOM   3139 HG23 ILE   157       9.391   1.295  20.007  1.00  0.00      5S   
ATOM   3140 CG1  ILE   157       6.651   1.121  19.600  1.00  1.00      5S   
ATOM   3141 HG11 ILE   157       5.690   1.126  19.041  1.00  0.00      5S   
ATOM   3142 HG12 ILE   157       6.445   1.472  20.636  1.00  0.00      5S   
ATOM   3143 CD   ILE   157       7.157  -0.320  19.637  1.00  1.00      5S   
ATOM   3144 HD1  ILE   157       8.002  -0.419  20.351  1.00  0.00      5S   
ATOM   3145 HD2  ILE   157       7.504  -0.626  18.627  1.00  0.00      5S   
ATOM   3146 HD3  ILE   157       6.339  -0.999  19.956  1.00  0.00      5S   
ATOM   3147 C    ILE   157       7.898   4.352  17.943  1.00  1.00      5S   
ATOM   3148 O    ILE   157       8.149   4.188  16.754  1.00  1.00      5S   
ATOM   3149 N    VAL   158       8.447   5.367  18.646  1.00  1.00      5S   
ATOM   3150 HN   VAL   158       8.239   5.512  19.609  1.00  0.00      5S   
ATOM   3151 CA   VAL   158       9.372   6.306  18.054  1.00  1.00      5S   
ATOM   3152 HA   VAL   158       8.894   6.732  17.183  1.00  0.00      5S   
ATOM   3153 CB   VAL   158       9.754   7.430  19.007  1.00  1.00      5S   
ATOM   3154 HB   VAL   158      10.187   6.999  19.937  1.00  0.00      5S   
ATOM   3155 CG1  VAL   158      10.794   8.365  18.357  1.00  1.00      5S   
ATOM   3156 HG11 VAL   158      10.450   8.680  17.348  1.00  0.00      5S   
ATOM   3157 HG12 VAL   158      11.775   7.854  18.261  1.00  0.00      5S   
ATOM   3158 HG13 VAL   158      10.932   9.271  18.983  1.00  0.00      5S   
ATOM   3159 CG2  VAL   158       8.486   8.219  19.388  1.00  1.00      5S   
ATOM   3160 HG21 VAL   158       7.743   7.567  19.891  1.00  0.00      5S   
ATOM   3161 HG22 VAL   158       8.024   8.665  18.482  1.00  0.00      5S   
ATOM   3162 HG23 VAL   158       8.757   9.040  20.087  1.00  0.00      5S   
ATOM   3163 C    VAL   158      10.604   5.552  17.616  1.00  1.00      5S   
ATOM   3164 O    VAL   158      11.208   4.817  18.393  1.00  1.00      5S   
ATOM   3165 N    LEU   159      10.967   5.685  16.323  1.00  1.00      5S   
ATOM   3166 HN   LEU   159      10.436   6.256  15.694  1.00  0.00      5S   
ATOM   3167 CA   LEU   159      12.070   4.979  15.735  1.00  1.00      5S   
ATOM   3168 HA   LEU   159      11.977   3.936  16.008  1.00  0.00      5S   
ATOM   3169 CB   LEU   159      12.059   5.113  14.197  1.00  1.00      5S   
ATOM   3170 HB1  LEU   159      12.334   6.149  13.904  1.00  0.00      5S   
ATOM   3171 HB2  LEU   159      11.011   4.944  13.864  1.00  0.00      5S   
ATOM   3172 CG   LEU   159      12.952   4.124  13.421  1.00  1.00      5S   
ATOM   3173 HG   LEU   159      12.928   3.142  13.940  1.00  0.00      5S   
ATOM   3174 CD1  LEU   159      12.382   3.907  12.011  1.00  1.00      5S   
ATOM   3175 HD11 LEU   159      12.341   4.877  11.472  1.00  0.00      5S   
ATOM   3176 HD12 LEU   159      11.354   3.493  12.071  1.00  0.00      5S   
ATOM   3177 HD13 LEU   159      13.019   3.199  11.444  1.00  0.00      5S   
ATOM   3178 CD2  LEU   159      14.410   4.594  13.332  1.00  1.00      5S   
ATOM   3179 HD21 LEU   159      14.903   4.537  14.323  1.00  0.00      5S   
ATOM   3180 HD22 LEU   159      14.441   5.647  12.979  1.00  0.00      5S   
ATOM   3181 HD23 LEU   159      14.978   3.959  12.622  1.00  0.00      5S   
ATOM   3182 C    LEU   159      13.344   5.540  16.297  1.00  1.00      5S   
ATOM   3183 O    LEU   159      13.588   6.744  16.236  1.00  1.00      5S   
ATOM   3184 N    GLN   160      14.160   4.652  16.898  1.00  1.00      5S   
ATOM   3185 HN   GLN   160      13.911   3.690  16.970  1.00  0.00      5S   
ATOM   3186 CA   GLN   160      15.421   5.024  17.480  1.00  1.00      5S   
ATOM   3187 HA   GLN   160      15.686   6.031  17.188  1.00  0.00      5S   
ATOM   3188 CB   GLN   160      15.421   4.904  19.020  1.00  1.00      5S   
ATOM   3189 HB1  GLN   160      16.440   5.141  19.399  1.00  0.00      5S   
ATOM   3190 HB2  GLN   160      15.171   3.858  19.308  1.00  0.00      5S   
ATOM   3191 CG   GLN   160      14.405   5.852  19.680  1.00  1.00      5S   
ATOM   3192 HG1  GLN   160      13.378   5.555  19.381  1.00  0.00      5S   
ATOM   3193 HG2  GLN   160      14.584   6.892  19.335  1.00  0.00      5S   
ATOM   3194 CD   GLN   160      14.541   5.807  21.204  1.00  1.00      5S   
ATOM   3195 OE1  GLN   160      15.623   6.033  21.757  1.00  1.00      5S   
ATOM   3196 NE2  GLN   160      13.401   5.518  21.896  1.00  1.00      5S   
ATOM   3197 HE21 GLN   160      13.427   5.492  22.894  1.00  0.00      5S   
ATOM   3198 HE22 GLN   160      12.552   5.345  21.398  1.00  0.00      5S   
ATOM   3199 C    GLN   160      16.451   4.093  16.930  1.00  1.00      5S   
ATOM   3200 O    GLN   160      16.209   2.895  16.809  1.00  1.00      5S   
ATOM   3201 N    LEU   161      17.634   4.638  16.573  1.00  1.00      5S   
ATOM   3202 HN   LEU   161      17.791   5.622  16.611  1.00  0.00      5S   
ATOM   3203 CA   LEU   161      18.740   3.850  16.096  1.00  1.00      5S   
ATOM   3204 HA   LEU   161      18.434   2.823  16.047  1.00  0.00      5S   
ATOM   3205 CB   LEU   161      19.241   4.334  14.726  1.00  1.00      5S   
ATOM   3206 HB1  LEU   161      20.184   3.811  14.457  1.00  0.00      5S   
ATOM   3207 HB2  LEU   161      19.452   5.426  14.764  1.00  0.00      5S   
ATOM   3208 CG   LEU   161      18.222   4.050  13.612  1.00  1.00      5S   
ATOM   3209 HG   LEU   161      17.306   4.655  13.806  1.00  0.00      5S   
ATOM   3210 CD1  LEU   161      18.797   4.481  12.267  1.00  1.00      5S   
ATOM   3211 HD11 LEU   161      19.614   3.794  11.971  1.00  0.00      5S   
ATOM   3212 HD12 LEU   161      19.209   5.508  12.358  1.00  0.00      5S   
ATOM   3213 HD13 LEU   161      18.016   4.459  11.481  1.00  0.00      5S   
ATOM   3214 CD2  LEU   161      17.835   2.565  13.585  1.00  1.00      5S   
ATOM   3215 HD21 LEU   161      17.228   2.315  14.478  1.00  0.00      5S   
ATOM   3216 HD22 LEU   161      18.754   1.939  13.600  1.00  0.00      5S   
ATOM   3217 HD23 LEU   161      17.237   2.325  12.685  1.00  0.00      5S   
ATOM   3218 C    LEU   161      19.868   3.932  17.070  1.00  1.00      5S   
ATOM   3219 O    LEU   161      19.998   4.960  17.734  1.00  1.00      5S   
ATOM   3220 N    PRO   162      20.722   2.905  17.194  1.00  1.00      5S   
ATOM   3221 CD   PRO   162      20.637   1.625  16.479  1.00  1.00      5S   
ATOM   3222 HD1  PRO   162      21.093   1.764  15.482  1.00  0.00      5S   
ATOM   3223 HD2  PRO   162      19.600   1.249  16.359  1.00  0.00      5S   
ATOM   3224 CA   PRO   162      21.808   2.908  18.158  1.00  1.00      5S   
ATOM   3225 HA   PRO   162      21.392   3.041  19.145  1.00  0.00      5S   
ATOM   3226 CB   PRO   162      22.510   1.549  17.972  1.00  1.00      5S   
ATOM   3227 HB1  PRO   162      22.838   1.122  18.941  1.00  0.00      5S   
ATOM   3228 HB2  PRO   162      23.386   1.634  17.291  1.00  0.00      5S   
ATOM   3229 CG   PRO   162      21.464   0.648  17.308  1.00  1.00      5S   
ATOM   3230 HG1  PRO   162      21.929  -0.146  16.689  1.00  0.00      5S   
ATOM   3231 HG2  PRO   162      20.812   0.190  18.083  1.00  0.00      5S   
ATOM   3232 C    PRO   162      22.754   4.047  17.891  1.00  1.00      5S   
ATOM   3233 O    PRO   162      22.866   4.516  16.764  1.00  1.00      5S   
ATOM   3234 N    GLN   163      23.430   4.546  18.929  1.00  1.00      5S   
ATOM   3235 HN   GLN   163      23.272   4.217  19.855  1.00  0.00      5S   
ATOM   3236 CA   GLN   163      24.358   5.634  18.771  1.00  1.00      5S   
ATOM   3237 HA   GLN   163      23.854   6.445  18.260  1.00  0.00      5S   
ATOM   3238 CB   GLN   163      24.869   6.109  20.141  1.00  1.00      5S   
ATOM   3239 HB1  GLN   163      25.756   6.767  20.017  1.00  0.00      5S   
ATOM   3240 HB2  GLN   163      25.187   5.209  20.717  1.00  0.00      5S   
ATOM   3241 CG   GLN   163      23.800   6.845  20.968  1.00  1.00      5S   
ATOM   3242 HG1  GLN   163      24.187   7.002  21.997  1.00  0.00      5S   
ATOM   3243 HG2  GLN   163      22.872   6.236  21.024  1.00  0.00      5S   
ATOM   3244 CD   GLN   163      23.484   8.214  20.353  1.00  1.00      5S   
ATOM   3245 OE1  GLN   163      24.248   8.765  19.553  1.00  1.00      5S   
ATOM   3246 NE2  GLN   163      22.310   8.778  20.760  1.00  1.00      5S   
ATOM   3247 HE21 GLN   163      22.045   9.670  20.397  1.00  0.00      5S   
ATOM   3248 HE22 GLN   163      21.725   8.294  21.408  1.00  0.00      5S   
ATOM   3249 C    GLN   163      25.532   5.194  17.932  1.00  1.00      5S   
ATOM   3250 O    GLN   163      26.132   4.151  18.185  1.00  1.00      5S   
ATOM   3251 N    GLY   164      25.842   5.977  16.874  1.00  1.00      5S   
ATOM   3252 HN   GLY   164      25.358   6.834  16.705  1.00  0.00      5S   
ATOM   3253 CA   GLY   164      26.902   5.643  15.952  1.00  1.00      5S   
ATOM   3254 HA1  GLY   164      27.581   4.945  16.419  1.00  0.00      5S   
ATOM   3255 HA2  GLY   164      27.379   6.570  15.676  1.00  0.00      5S   
ATOM   3256 C    GLY   164      26.402   5.003  14.693  1.00  1.00      5S   
ATOM   3257 O    GLY   164      27.204   4.615  13.845  1.00  1.00      5S   
ATOM   3258 N    THR   165      25.066   4.884  14.511  1.00  1.00      5S   
ATOM   3259 HN   THR   165      24.412   5.141  15.219  1.00  0.00      5S   
ATOM   3260 CA   THR   165      24.496   4.349  13.294  1.00  1.00      5S   
ATOM   3261 HA   THR   165      24.992   3.410  13.085  1.00  0.00      5S   
ATOM   3262 CB   THR   165      23.007   4.105  13.401  1.00  1.00      5S   
ATOM   3263 HB   THR   165      22.454   5.058  13.558  1.00  0.00      5S   
ATOM   3264 OG1  THR   165      22.757   3.245  14.493  1.00  1.00      5S   
ATOM   3265 HG1  THR   165      22.785   3.809  15.278  1.00  0.00      5S   
ATOM   3266 CG2  THR   165      22.477   3.388  12.158  1.00  1.00      5S   
ATOM   3267 HG21 THR   165      23.109   2.505  11.953  1.00  0.00      5S   
ATOM   3268 HG22 THR   165      22.489   4.058  11.276  1.00  0.00      5S   
ATOM   3269 HG23 THR   165      21.439   3.035  12.333  1.00  0.00      5S   
ATOM   3270 C    THR   165      24.743   5.320  12.169  1.00  1.00      5S   
ATOM   3271 O    THR   165      24.446   6.507  12.278  1.00  1.00      5S   
ATOM   3272 N    THR   166      25.324   4.828  11.058  1.00  1.00      5S   
ATOM   3273 HN   THR   166      25.563   3.856  10.992  1.00  0.00      5S   
ATOM   3274 CA   THR   166      25.656   5.621   9.909  1.00  1.00      5S   
ATOM   3275 HA   THR   166      26.057   6.560  10.261  1.00  0.00      5S   
ATOM   3276 CB   THR   166      26.671   4.951   9.005  1.00  1.00      5S   
ATOM   3277 HB   THR   166      26.243   4.033   8.543  1.00  0.00      5S   
ATOM   3278 OG1  THR   166      27.816   4.582   9.764  1.00  1.00      5S   
ATOM   3279 HG1  THR   166      27.490   4.329  10.632  1.00  0.00      5S   
ATOM   3280 CG2  THR   166      27.115   5.931   7.904  1.00  1.00      5S   
ATOM   3281 HG21 THR   166      27.571   6.834   8.365  1.00  0.00      5S   
ATOM   3282 HG22 THR   166      26.251   6.248   7.284  1.00  0.00      5S   
ATOM   3283 HG23 THR   166      27.866   5.451   7.242  1.00  0.00      5S   
ATOM   3284 C    THR   166      24.388   5.879   9.150  1.00  1.00      5S   
ATOM   3285 O    THR   166      23.705   4.954   8.711  1.00  1.00      5S   
ATOM   3286 N    LEU   167      24.045   7.176   9.018  1.00  1.00      5S   
ATOM   3287 HN   LEU   167      24.605   7.904   9.406  1.00  0.00      5S   
ATOM   3288 CA   LEU   167      22.847   7.598   8.353  1.00  1.00      5S   
ATOM   3289 HA   LEU   167      22.286   6.729   8.075  1.00  0.00      5S   
ATOM   3290 CB   LEU   167      21.988   8.521   9.239  1.00  1.00      5S   
ATOM   3291 HB1  LEU   167      21.206   9.015   8.624  1.00  0.00      5S   
ATOM   3292 HB2  LEU   167      22.630   9.314   9.680  1.00  0.00      5S   
ATOM   3293 CG   LEU   167      21.269   7.766  10.370  1.00  1.00      5S   
ATOM   3294 HG   LEU   167      22.017   7.153  10.925  1.00  0.00      5S   
ATOM   3295 CD1  LEU   167      20.629   8.745  11.365  1.00  1.00      5S   
ATOM   3296 HD11 LEU   167      19.876   9.369  10.841  1.00  0.00      5S   
ATOM   3297 HD12 LEU   167      21.403   9.410  11.802  1.00  0.00      5S   
ATOM   3298 HD13 LEU   167      20.121   8.192  12.182  1.00  0.00      5S   
ATOM   3299 CD2  LEU   167      20.210   6.826   9.783  1.00  1.00      5S   
ATOM   3300 HD21 LEU   167      20.678   6.077   9.114  1.00  0.00      5S   
ATOM   3301 HD22 LEU   167      19.460   7.400   9.202  1.00  0.00      5S   
ATOM   3302 HD23 LEU   167      19.690   6.288  10.592  1.00  0.00      5S   
ATOM   3303 C    LEU   167      23.201   8.348   7.108  1.00  1.00      5S   
ATOM   3304 O    LEU   167      24.188   9.091   7.120  1.00  1.00      5S   
ATOM   3305 N    PRO   168      22.398   8.203   6.021  1.00  1.00      5S   
ATOM   3306 CD   PRO   168      21.389   7.200   5.785  1.00  1.00      5S   
ATOM   3307 HD1  PRO   168      20.444   7.646   6.158  1.00  0.00      5S   
ATOM   3308 HD2  PRO   168      21.630   6.232   6.265  1.00  0.00      5S   
ATOM   3309 CA   PRO   168      22.421   9.066   4.882  1.00  1.00      5S   
ATOM   3310 HA   PRO   168      23.497   9.025   4.700  1.00  0.00      5S   
ATOM   3311 CB   PRO   168      21.747   8.406   3.715  1.00  1.00      5S   
ATOM   3312 HB1  PRO   168      22.401   8.346   2.816  1.00  0.00      5S   
ATOM   3313 HB2  PRO   168      20.835   8.964   3.430  1.00  0.00      5S   
ATOM   3314 CG   PRO   168      21.361   7.052   4.257  1.00  1.00      5S   
ATOM   3315 HG1  PRO   168      20.355   6.823   3.867  1.00  0.00      5S   
ATOM   3316 HG2  PRO   168      22.122   6.318   3.915  1.00  0.00      5S   
ATOM   3317 C    PRO   168      21.679  10.489   5.109  1.00  1.00      5S   
ATOM   3318 O    PRO   168      21.403  10.668   6.289  1.00  1.00      5S   
ATOM   3319 N    LYS   169      21.564  11.517   4.020  1.00  1.00      5S   
ATOM   3320 HN   LYS   169      21.928  11.167   3.178  1.00  0.00      5S   
ATOM   3321 CA   LYS   169      21.861  13.088   3.834  1.00  1.00      5S   
ATOM   3322 HA   LYS   169      22.421  13.652   4.577  1.00  0.00      5S   
ATOM   3323 CB   LYS   169      22.889  13.843   2.837  1.00  1.00      5S   
ATOM   3324 HB1  LYS   169      23.621  14.577   3.295  1.00  0.00      5S   
ATOM   3325 HB2  LYS   169      22.309  14.461   2.126  1.00  0.00      5S   
ATOM   3326 CG   LYS   169      23.908  13.007   2.099  1.00  0.00      5S   
ATOM   3327 HG1  LYS   169      24.931  13.413   1.954  1.00  0.00      5S   
ATOM   3328 HG2  LYS   169      23.405  12.974   1.103  1.00  0.00      5S   
ATOM   3329 CD   LYS   169      24.154  11.615   2.599  1.00  0.00      5S   
ATOM   3330 HD1  LYS   169      25.065  11.122   2.203  1.00  0.00      5S   
ATOM   3331 HD2  LYS   169      23.301  11.120   2.039  1.00  0.00      5S   
ATOM   3332 CE   LYS   169      24.309  11.277   4.116  1.00  0.00      5S   
ATOM   3333 HE1  LYS   169      24.849  10.416   4.459  1.00  0.00      5S   
ATOM   3334 HE2  LYS   169      23.520  10.617   3.719  1.00  0.00      5S   
ATOM   3335 NZ   LYS   169      23.754  12.088   5.369  1.00  0.00      5S   
ATOM   3336 HZ1  LYS   169      22.803  12.211   4.946  1.00  0.00      5S   
ATOM   3337 HZ2  LYS   169      23.876  13.087   5.181  1.00  0.00      5S   
ATOM   3338 HZ3  LYS   169      22.903  11.824   5.968  1.00  0.00      5S   
ATOM   3339 C    LYS   169      20.566  13.474   4.007  1.00  1.00      5S   
ATOM   3340 O    LYS   169      19.761  13.077   3.180  1.00  1.00      5S   
ATOM   3341 N    GLY   170      20.291  14.038   5.193  1.00  1.00      5S   
ATOM   3342 HN   GLY   170      20.960  14.295   5.896  1.00  0.00      5S   
ATOM   3343 CA   GLY   170      18.921  14.240   5.487  1.00  1.00      5S   
ATOM   3344 HA1  GLY   170      18.389  14.306   4.548  1.00  0.00      5S   
ATOM   3345 HA2  GLY   170      18.888  15.158   6.037  1.00  0.00      5S   
ATOM   3346 C    GLY   170      18.241  13.154   6.282  1.00  1.00      5S   
ATOM   3347 O    GLY   170      17.018  13.095   6.220  1.00  1.00      5S   
ATOM   3348 N    PHE   171      18.945  12.286   7.054  1.00  1.00      5S   
ATOM   3349 HN   PHE   171      19.942  12.276   7.098  1.00  0.00      5S   
ATOM   3350 CA   PHE   171      18.276  11.301   7.896  1.00  1.00      5S   
ATOM   3351 HA   PHE   171      17.206  11.466   7.901  1.00  0.00      5S   
ATOM   3352 CB   PHE   171      18.565   9.839   7.498  1.00  1.00      5S   
ATOM   3353 HB1  PHE   171      18.225   9.127   8.277  1.00  0.00      5S   
ATOM   3354 HB2  PHE   171      19.651   9.693   7.359  1.00  0.00      5S   
ATOM   3355 CG   PHE   171      17.861   9.481   6.224  1.00  1.00      5S   
ATOM   3356 CD1  PHE   171      16.531   9.059   6.232  1.00  1.00      5S   
ATOM   3357 HD1  PHE   171      16.002   9.013   7.169  1.00  0.00      5S   
ATOM   3358 CE1  PHE   171      15.904   8.685   5.037  1.00  1.00      5S   
ATOM   3359 HE1  PHE   171      14.881   8.364   5.060  1.00  0.00      5S   
ATOM   3360 CZ   PHE   171      16.605   8.726   3.822  1.00  1.00      5S   
ATOM   3361 HZ   PHE   171      16.133   8.437   2.897  1.00  0.00      5S   
ATOM   3362 CD2  PHE   171      18.515   9.529   4.995  1.00  1.00      5S   
ATOM   3363 HD2  PHE   171      19.497   9.862   4.958  1.00  0.00      5S   
ATOM   3364 CE2  PHE   171      17.926   9.154   3.798  1.00  1.00      5S   
ATOM   3365 HE2  PHE   171      18.496   9.198   2.881  1.00  0.00      5S   
ATOM   3366 C    PHE   171      18.760  11.475   9.307  1.00  1.00      5S   
ATOM   3367 O    PHE   171      19.959  11.604   9.549  1.00  1.00      5S   
ATOM   3368 N    TYR   172      17.815  11.507  10.277  1.00  1.00      5S   
ATOM   3369 HN   TYR   172      16.846  11.370  10.084  1.00  0.00      5S   
ATOM   3370 CA   TYR   172      18.127  11.858  11.642  1.00  1.00      5S   
ATOM   3371 HA   TYR   172      19.173  11.665  11.839  1.00  0.00      5S   
ATOM   3372 CB   TYR   172      17.791  13.340  11.987  1.00  1.00      5S   
ATOM   3373 HB1  TYR   172      18.148  13.580  13.013  1.00  0.00      5S   
ATOM   3374 HB2  TYR   172      16.695  13.508  11.941  1.00  0.00      5S   
ATOM   3375 CG   TYR   172      18.439  14.314  11.024  1.00  1.00      5S   
ATOM   3376 CD1  TYR   172      17.867  14.570   9.761  1.00  1.00      5S   
ATOM   3377 HD1  TYR   172      16.965  14.055   9.466  1.00  0.00      5S   
ATOM   3378 CE1  TYR   172      18.459  15.474   8.872  1.00  1.00      5S   
ATOM   3379 HE1  TYR   172      17.998  15.659   7.914  1.00  0.00      5S   
ATOM   3380 CZ   TYR   172      19.632  16.143   9.235  1.00  1.00      5S   
ATOM   3381 OH   TYR   172      20.216  17.092   8.371  1.00  1.00      5S   
ATOM   3382 HH   TYR   172      19.512  17.624   7.992  1.00  0.00      5S   
ATOM   3383 CD2  TYR   172      19.613  15.003  11.377  1.00  1.00      5S   
ATOM   3384 HD2  TYR   172      20.060  14.840  12.346  1.00  0.00      5S   
ATOM   3385 CE2  TYR   172      20.210  15.907  10.488  1.00  1.00      5S   
ATOM   3386 HE2  TYR   172      21.103  16.441  10.778  1.00  0.00      5S   
ATOM   3387 C    TYR   172      17.325  10.943  12.531  1.00  1.00      5S   
ATOM   3388 O    TYR   172      16.241  10.484  12.171  1.00  1.00      5S   
ATOM   3389 N    ALA   173      17.871  10.650  13.723  1.00  1.00      5S   
ATOM   3390 HN   ALA   173      18.748  11.020  14.017  1.00  0.00      5S   
ATOM   3391 CA   ALA   173      17.232   9.878  14.745  1.00  1.00      5S   
ATOM   3392 HA   ALA   173      16.170  10.097  14.766  1.00  0.00      5S   
ATOM   3393 CB   ALA   173      17.466   8.367  14.538  1.00  1.00      5S   
ATOM   3394 HB1  ALA   173      18.550   8.142  14.606  1.00  0.00      5S   
ATOM   3395 HB2  ALA   173      17.116   8.076  13.522  1.00  0.00      5S   
ATOM   3396 HB3  ALA   173      16.912   7.760  15.284  1.00  0.00      5S   
ATOM   3397 C    ALA   173      17.949  10.450  15.989  1.00  1.00      5S   
ATOM   3398 OT1  ALA   173      18.663   9.712  16.710  1.00  1.00      5S   
ATOM   3399 OT2  ALA   173      17.874  11.695  16.168  1.00  0.00      5S   
TER 
ATOM   3400 N    ALA    50      -4.133  21.141  16.174  1.00  1.00      6S   
ATOM   3401 HT1  ALA    50      -3.725  21.436  15.264  1.00  0.00      6S   
ATOM   3402 HT2  ALA    50      -5.162  21.288  16.163  1.00  0.00      6S   
ATOM   3403 HT3  ALA    50      -3.928  20.133  16.338  1.00  0.00      6S   
ATOM   3404 CA   ALA    50      -3.529  21.947  17.263  1.00  1.00      6S   
ATOM   3405 HA   ALA    50      -3.915  22.953  17.175  1.00  0.00      6S   
ATOM   3406 CB   ALA    50      -3.912  21.352  18.622  1.00  1.00      6S   
ATOM   3407 HB1  ALA    50      -3.549  20.303  18.707  1.00  0.00      6S   
ATOM   3408 HB2  ALA    50      -5.019  21.354  18.734  1.00  0.00      6S   
ATOM   3409 HB3  ALA    50      -3.487  21.937  19.464  1.00  0.00      6S   
ATOM   3410 C    ALA    50      -2.038  21.995  17.169  1.00  1.00      6S   
ATOM   3411 O    ALA    50      -1.416  21.303  16.367  1.00  1.00      6S   
ATOM   3412 N    SER    51      -1.422  22.866  17.992  1.00  1.00      6S   
ATOM   3413 HN   SER    51      -1.942  23.450  18.611  1.00  0.00      6S   
ATOM   3414 CA   SER    51       0.006  23.057  18.012  1.00  1.00      6S   
ATOM   3415 HA   SER    51       0.374  23.080  16.995  1.00  0.00      6S   
ATOM   3416 CB   SER    51       0.351  24.390  18.721  1.00  1.00      6S   
ATOM   3417 HB1  SER    51      -0.180  24.436  19.694  1.00  0.00      6S   
ATOM   3418 HB2  SER    51       0.006  25.232  18.085  1.00  0.00      6S   
ATOM   3419 OG   SER    51       1.736  24.569  18.976  1.00  1.00      6S   
ATOM   3420 HG1  SER    51       2.112  24.945  18.169  1.00  0.00      6S   
ATOM   3421 C    SER    51       0.644  21.902  18.731  1.00  1.00      6S   
ATOM   3422 O    SER    51       0.038  21.286  19.601  1.00  1.00      6S   
ATOM   3423 N    TRP    52       1.910  21.598  18.382  1.00  1.00      6S   
ATOM   3424 HN   TRP    52       2.369  22.069  17.630  1.00  0.00      6S   
ATOM   3425 CA   TRP    52       2.692  20.610  19.084  1.00  1.00      6S   
ATOM   3426 HA   TRP    52       2.058  19.769  19.320  1.00  0.00      6S   
ATOM   3427 CB   TRP    52       3.894  20.131  18.246  1.00  1.00      6S   
ATOM   3428 HB1  TRP    52       4.656  19.643  18.889  1.00  0.00      6S   
ATOM   3429 HB2  TRP    52       4.362  21.010  17.747  1.00  0.00      6S   
ATOM   3430 CG   TRP    52       3.496  19.135  17.188  1.00  1.00      6S   
ATOM   3431 CD1  TRP    52       3.220  19.384  15.880  1.00  1.00      6S   
ATOM   3432 HD1  TRP    52       3.266  20.356  15.415  1.00  0.00      6S   
ATOM   3433 NE1  TRP    52       2.884  18.220  15.242  1.00  1.00      6S   
ATOM   3434 HE1  TRP    52       2.652  18.140  14.295  1.00  0.00      6S   
ATOM   3435 CE2  TRP    52       2.919  17.188  16.132  1.00  1.00      6S   
ATOM   3436 CD2  TRP    52       3.307  17.717  17.378  1.00  1.00      6S   
ATOM   3437 CE3  TRP    52       3.440  16.892  18.492  1.00  1.00      6S   
ATOM   3438 HE3  TRP    52       3.712  17.274  19.463  1.00  0.00      6S   
ATOM   3439 CZ3  TRP    52       3.155  15.525  18.332  1.00  1.00      6S   
ATOM   3440 HZ3  TRP    52       3.227  14.861  19.180  1.00  0.00      6S   
ATOM   3441 CZ2  TRP    52       2.650  15.837  15.969  1.00  1.00      6S   
ATOM   3442 HZ2  TRP    52       2.351  15.429  15.015  1.00  0.00      6S   
ATOM   3443 CH2  TRP    52       2.768  15.006  17.087  1.00  1.00      6S   
ATOM   3444 HH2  TRP    52       2.561  13.951  16.982  1.00  0.00      6S   
ATOM   3445 C    TRP    52       3.208  21.137  20.391  1.00  1.00      6S   
ATOM   3446 O    TRP    52       3.519  20.350  21.281  1.00  1.00      6S   
ATOM   3447 N    PHE    53       3.310  22.472  20.540  1.00  1.00      6S   
ATOM   3448 HN   PHE    53       2.983  23.110  19.844  1.00  0.00      6S   
ATOM   3449 CA   PHE    53       3.937  23.070  21.685  1.00  1.00      6S   
ATOM   3450 HA   PHE    53       4.322  22.298  22.327  1.00  0.00      6S   
ATOM   3451 CB   PHE    53       5.093  24.026  21.306  1.00  1.00      6S   
ATOM   3452 HB1  PHE    53       5.627  24.379  22.213  1.00  0.00      6S   
ATOM   3453 HB2  PHE    53       4.707  24.902  20.743  1.00  0.00      6S   
ATOM   3454 CG   PHE    53       6.091  23.323  20.432  1.00  1.00      6S   
ATOM   3455 CD1  PHE    53       5.957  23.379  19.037  1.00  1.00      6S   
ATOM   3456 HD1  PHE    53       5.119  23.911  18.614  1.00  0.00      6S   
ATOM   3457 CE1  PHE    53       6.888  22.753  18.204  1.00  1.00      6S   
ATOM   3458 HE1  PHE    53       6.789  22.821  17.133  1.00  0.00      6S   
ATOM   3459 CZ   PHE    53       7.952  22.047  18.769  1.00  1.00      6S   
ATOM   3460 HZ   PHE    53       8.674  21.568  18.139  1.00  0.00      6S   
ATOM   3461 CD2  PHE    53       7.163  22.607  20.985  1.00  1.00      6S   
ATOM   3462 HD2  PHE    53       7.275  22.550  22.057  1.00  0.00      6S   
ATOM   3463 CE2  PHE    53       8.091  21.967  20.157  1.00  1.00      6S   
ATOM   3464 HE2  PHE    53       8.922  21.425  20.583  1.00  0.00      6S   
ATOM   3465 C    PHE    53       2.901  23.830  22.457  1.00  1.00      6S   
ATOM   3466 O    PHE    53       1.871  24.242  21.928  1.00  1.00      6S   
ATOM   3467 N    THR    54       3.168  24.052  23.760  1.00  1.00      6S   
ATOM   3468 HN   THR    54       3.964  23.641  24.204  1.00  0.00      6S   
ATOM   3469 CA   THR    54       2.354  24.878  24.618  1.00  1.00      6S   
ATOM   3470 HA   THR    54       1.320  24.594  24.479  1.00  0.00      6S   
ATOM   3471 CB   THR    54       2.729  24.739  26.084  1.00  1.00      6S   
ATOM   3472 HB   THR    54       2.132  25.438  26.712  1.00  0.00      6S   
ATOM   3473 OG1  THR    54       4.114  25.004  26.272  1.00  1.00      6S   
ATOM   3474 HG1  THR    54       4.215  25.358  27.162  1.00  0.00      6S   
ATOM   3475 CG2  THR    54       2.449  23.294  26.538  1.00  1.00      6S   
ATOM   3476 HG21 THR    54       3.046  22.569  25.945  1.00  0.00      6S   
ATOM   3477 HG22 THR    54       1.374  23.049  26.414  1.00  0.00      6S   
ATOM   3478 HG23 THR    54       2.722  23.170  27.607  1.00  0.00      6S   
ATOM   3479 C    THR    54       2.507  26.317  24.195  1.00  1.00      6S   
ATOM   3480 O    THR    54       3.506  26.702  23.590  1.00  1.00      6S   
ATOM   3481 N    ALA    55       1.494  27.153  24.477  1.00  1.00      6S   
ATOM   3482 HN   ALA    55       0.694  26.872  25.000  1.00  0.00      6S   
ATOM   3483 CA   ALA    55       1.490  28.493  23.965  1.00  1.00      6S   
ATOM   3484 HA   ALA    55       1.845  28.475  22.943  1.00  0.00      6S   
ATOM   3485 CB   ALA    55       0.082  29.095  23.969  1.00  1.00      6S   
ATOM   3486 HB1  ALA    55      -0.283  29.268  25.004  1.00  0.00      6S   
ATOM   3487 HB2  ALA    55      -0.619  28.397  23.476  1.00  0.00      6S   
ATOM   3488 HB3  ALA    55       0.062  30.052  23.406  1.00  0.00      6S   
ATOM   3489 C    ALA    55       2.392  29.374  24.781  1.00  1.00      6S   
ATOM   3490 O    ALA    55       2.592  29.161  25.976  1.00  1.00      6S   
ATOM   3491 N    LEU    56       2.952  30.405  24.125  1.00  1.00      6S   
ATOM   3492 HN   LEU    56       2.877  30.491  23.131  1.00  0.00      6S   
ATOM   3493 CA   LEU    56       3.612  31.488  24.795  1.00  1.00      6S   
ATOM   3494 HA   LEU    56       4.018  31.152  25.738  1.00  0.00      6S   
ATOM   3495 CB   LEU    56       4.716  32.105  23.914  1.00  1.00      6S   
ATOM   3496 HB1  LEU    56       4.905  33.147  24.224  1.00  0.00      6S   
ATOM   3497 HB2  LEU    56       4.363  32.127  22.860  1.00  0.00      6S   
ATOM   3498 CG   LEU    56       6.078  31.391  23.969  1.00  1.00      6S   
ATOM   3499 HG   LEU    56       5.923  30.307  23.773  1.00  0.00      6S   
ATOM   3500 CD1  LEU    56       6.995  31.958  22.875  1.00  1.00      6S   
ATOM   3501 HD11 LEU    56       7.150  33.046  23.040  1.00  0.00      6S   
ATOM   3502 HD12 LEU    56       6.531  31.816  21.877  1.00  0.00      6S   
ATOM   3503 HD13 LEU    56       7.982  31.451  22.890  1.00  0.00      6S   
ATOM   3504 CD2  LEU    56       6.742  31.541  25.347  1.00  1.00      6S   
ATOM   3505 HD21 LEU    56       6.109  31.094  26.141  1.00  0.00      6S   
ATOM   3506 HD22 LEU    56       6.897  32.617  25.576  1.00  0.00      6S   
ATOM   3507 HD23 LEU    56       7.728  31.030  25.355  1.00  0.00      6S   
ATOM   3508 C    LEU    56       2.571  32.538  25.074  1.00  1.00      6S   
ATOM   3509 O    LEU    56       2.119  33.240  24.176  1.00  1.00      6S   
ATOM   3510 N    THR    57       2.164  32.669  26.354  1.00  1.00      6S   
ATOM   3511 HN   THR    57       2.517  32.073  27.070  1.00  0.00      6S   
ATOM   3512 CA   THR    57       1.189  33.649  26.777  1.00  1.00      6S   
ATOM   3513 HA   THR    57       0.416  33.704  26.026  1.00  0.00      6S   
ATOM   3514 CB   THR    57       0.553  33.274  28.104  1.00  1.00      6S   
ATOM   3515 HB   THR    57       1.318  33.285  28.911  1.00  0.00      6S   
ATOM   3516 OG1  THR    57       0.013  31.959  28.034  1.00  1.00      6S   
ATOM   3517 HG1  THR    57       0.709  31.397  27.682  1.00  0.00      6S   
ATOM   3518 CG2  THR    57      -0.586  34.248  28.461  1.00  1.00      6S   
ATOM   3519 HG21 THR    57      -1.288  34.355  27.606  1.00  0.00      6S   
ATOM   3520 HG22 THR    57      -0.175  35.250  28.708  1.00  0.00      6S   
ATOM   3521 HG23 THR    57      -1.154  33.877  29.339  1.00  0.00      6S   
ATOM   3522 C    THR    57       1.867  34.999  26.884  1.00  1.00      6S   
ATOM   3523 O    THR    57       2.987  35.107  27.374  1.00  1.00      6S   
ATOM   3524 N    GLN    58       1.193  36.058  26.394  1.00  1.00      6S   
ATOM   3525 HN   GLN    58       0.283  35.934  25.992  1.00  0.00      6S   
ATOM   3526 CA   GLN    58       1.677  37.407  26.345  1.00  1.00      6S   
ATOM   3527 HA   GLN    58       2.756  37.400  26.371  1.00  0.00      6S   
ATOM   3528 CB   GLN    58       1.191  38.120  25.063  1.00  1.00      6S   
ATOM   3529 HB1  GLN    58       0.084  38.056  25.003  1.00  0.00      6S   
ATOM   3530 HB2  GLN    58       1.590  37.566  24.187  1.00  0.00      6S   
ATOM   3531 CG   GLN    58       1.625  39.590  24.972  1.00  1.00      6S   
ATOM   3532 HG1  GLN    58       2.732  39.652  24.923  1.00  0.00      6S   
ATOM   3533 HG2  GLN    58       1.281  40.137  25.872  1.00  0.00      6S   
ATOM   3534 CD   GLN    58       1.009  40.245  23.733  1.00  1.00      6S   
ATOM   3535 OE1  GLN    58       0.506  39.574  22.827  1.00  1.00      6S   
ATOM   3536 NE2  GLN    58       1.063  41.606  23.712  1.00  1.00      6S   
ATOM   3537 HE21 GLN    58       0.780  42.103  22.892  1.00  0.00      6S   
ATOM   3538 HE22 GLN    58       1.574  42.079  24.432  1.00  0.00      6S   
ATOM   3539 C    GLN    58       1.153  38.155  27.536  1.00  1.00      6S   
ATOM   3540 O    GLN    58      -0.026  38.484  27.607  1.00  1.00      6S   
ATOM   3541 N    HSD    59       2.033  38.468  28.505  1.00  1.00      6S   
ATOM   3542 HN   HSD    59       2.993  38.197  28.435  1.00  0.00      6S   
ATOM   3543 CA   HSD    59       1.637  39.118  29.734  1.00  1.00      6S   
ATOM   3544 HA   HSD    59       0.598  38.899  29.935  1.00  0.00      6S   
ATOM   3545 CB   HSD    59       2.466  38.640  30.942  1.00  1.00      6S   
ATOM   3546 HB1  HSD    59       2.220  39.231  31.850  1.00  0.00      6S   
ATOM   3547 HB2  HSD    59       3.543  38.768  30.735  1.00  0.00      6S   
ATOM   3548 ND1  HSD    59       2.944  36.168  30.665  1.00  1.00      6S   
ATOM   3549 HD1  HSD    59       3.660  36.273  29.969  1.00  0.00      6S   
ATOM   3550 CG   HSD    59       2.248  37.198  31.259  1.00  1.00      6S   
ATOM   3551 CE1  HSD    59       2.480  35.019  31.195  1.00  1.00      6S   
ATOM   3552 HE1  HSD    59       2.868  34.039  30.920  1.00  0.00      6S   
ATOM   3553 NE2  HSD    59       1.532  35.241  32.078  1.00  1.00      6S   
ATOM   3554 CD2  HSD    59       1.385  36.613  32.125  1.00  1.00      6S   
ATOM   3555 HD2  HSD    59       0.655  37.058  32.793  1.00  0.00      6S   
ATOM   3556 C    HSD    59       1.766  40.616  29.665  1.00  1.00      6S   
ATOM   3557 O    HSD    59       1.345  41.294  30.600  1.00  1.00      6S   
ATOM   3558 N    GLY    60       2.335  41.183  28.575  1.00  1.00      6S   
ATOM   3559 HN   GLY    60       2.672  40.634  27.812  1.00  0.00      6S   
ATOM   3560 CA   GLY    60       2.494  42.619  28.470  1.00  1.00      6S   
ATOM   3561 HA1  GLY    60       3.550  42.817  28.373  1.00  0.00      6S   
ATOM   3562 HA2  GLY    60       2.050  43.112  29.323  1.00  0.00      6S   
ATOM   3563 C    GLY    60       1.795  43.138  27.254  1.00  1.00      6S   
ATOM   3564 O    GLY    60       1.033  42.435  26.599  1.00  1.00      6S   
ATOM   3565 N    LYS    61       2.042  44.423  26.923  1.00  1.00      6S   
ATOM   3566 HN   LYS    61       2.606  45.009  27.501  1.00  0.00      6S   
ATOM   3567 CA   LYS    61       1.468  45.060  25.759  1.00  1.00      6S   
ATOM   3568 HA   LYS    61       0.457  44.704  25.623  1.00  0.00      6S   
ATOM   3569 CB   LYS    61       1.450  46.593  25.912  1.00  1.00      6S   
ATOM   3570 HB1  LYS    61       1.102  47.064  24.964  1.00  0.00      6S   
ATOM   3571 HB2  LYS    61       2.481  46.955  26.124  1.00  0.00      6S   
ATOM   3572 CG   LYS    61       0.525  47.072  27.037  1.00  1.00      6S   
ATOM   3573 HG1  LYS    61       0.819  46.592  27.997  1.00  0.00      6S   
ATOM   3574 HG2  LYS    61      -0.519  46.767  26.804  1.00  0.00      6S   
ATOM   3575 CD   LYS    61       0.589  48.594  27.206  1.00  1.00      6S   
ATOM   3576 HD1  LYS    61       0.269  49.082  26.259  1.00  0.00      6S   
ATOM   3577 HD2  LYS    61       1.651  48.879  27.389  1.00  0.00      6S   
ATOM   3578 CE   LYS    61      -0.258  49.107  28.375  1.00  1.00      6S   
ATOM   3579 HE1  LYS    61      -0.114  50.200  28.499  1.00  0.00      6S   
ATOM   3580 HE2  LYS    61       0.033  48.584  29.311  1.00  0.00      6S   
ATOM   3581 NZ   LYS    61      -1.702  48.860  28.145  1.00  1.00      6S   
ATOM   3582 HZ1  LYS    61      -1.869  47.839  28.039  1.00  0.00      6S   
ATOM   3583 HZ2  LYS    61      -2.006  49.351  27.281  1.00  0.00      6S   
ATOM   3584 HZ3  LYS    61      -2.245  49.217  28.957  1.00  0.00      6S   
ATOM   3585 C    LYS    61       2.233  44.727  24.504  1.00  1.00      6S   
ATOM   3586 O    LYS    61       1.703  44.849  23.402  1.00  1.00      6S   
ATOM   3587 N    GLU    62       3.499  44.281  24.638  1.00  1.00      6S   
ATOM   3588 HN   GLU    62       3.925  44.178  25.533  1.00  0.00      6S   
ATOM   3589 CA   GLU    62       4.351  43.982  23.515  1.00  1.00      6S   
ATOM   3590 HA   GLU    62       4.251  44.771  22.783  1.00  0.00      6S   
ATOM   3591 CB   GLU    62       5.826  43.844  23.942  1.00  1.00      6S   
ATOM   3592 HB1  GLU    62       6.472  43.849  23.035  1.00  0.00      6S   
ATOM   3593 HB2  GLU    62       5.976  42.873  24.469  1.00  0.00      6S   
ATOM   3594 CG   GLU    62       6.265  44.974  24.890  1.00  1.00      6S   
ATOM   3595 HG1  GLU    62       5.583  45.024  25.767  1.00  0.00      6S   
ATOM   3596 HG2  GLU    62       6.226  45.946  24.354  1.00  0.00      6S   
ATOM   3597 CD   GLU    62       7.677  44.748  25.422  1.00  1.00      6S   
ATOM   3598 OE1  GLU    62       8.367  43.801  24.961  1.00  1.00      6S   
ATOM   3599 OE2  GLU    62       8.075  45.528  26.328  1.00  1.00      6S   
ATOM   3600 C    GLU    62       3.955  42.676  22.903  1.00  1.00      6S   
ATOM   3601 O    GLU    62       3.875  41.666  23.598  1.00  1.00      6S   
ATOM   3602 N    ASP    63       3.717  42.659  21.574  1.00  1.00      6S   
ATOM   3603 HN   ASP    63       3.747  43.488  21.020  1.00  0.00      6S   
ATOM   3604 CA   ASP    63       3.436  41.438  20.862  1.00  1.00      6S   
ATOM   3605 HA   ASP    63       2.730  40.853  21.437  1.00  0.00      6S   
ATOM   3606 CB   ASP    63       2.873  41.701  19.443  1.00  1.00      6S   
ATOM   3607 HB1  ASP    63       2.927  40.783  18.820  1.00  0.00      6S   
ATOM   3608 HB2  ASP    63       3.477  42.496  18.954  1.00  0.00      6S   
ATOM   3609 CG   ASP    63       1.409  42.144  19.491  1.00  1.00      6S   
ATOM   3610 OD1  ASP    63       0.636  41.593  20.319  1.00  1.00      6S   
ATOM   3611 OD2  ASP    63       1.037  43.021  18.668  1.00  1.00      6S   
ATOM   3612 C    ASP    63       4.704  40.626  20.745  1.00  1.00      6S   
ATOM   3613 O    ASP    63       5.810  41.107  20.992  1.00  1.00      6S   
ATOM   3614 N    LEU    64       4.554  39.337  20.382  1.00  1.00      6S   
ATOM   3615 HN   LEU    64       3.655  38.953  20.183  1.00  0.00      6S   
ATOM   3616 CA   LEU    64       5.658  38.418  20.310  1.00  1.00      6S   
ATOM   3617 HA   LEU    64       6.264  38.559  21.194  1.00  0.00      6S   
ATOM   3618 CB   LEU    64       5.140  36.966  20.247  1.00  1.00      6S   
ATOM   3619 HB1  LEU    64       4.522  36.835  19.333  1.00  0.00      6S   
ATOM   3620 HB2  LEU    64       4.469  36.808  21.119  1.00  0.00      6S   
ATOM   3621 CG   LEU    64       6.215  35.864  20.292  1.00  1.00      6S   
ATOM   3622 HG   LEU    64       6.859  35.956  19.388  1.00  0.00      6S   
ATOM   3623 CD1  LEU    64       7.114  35.999  21.528  1.00  1.00      6S   
ATOM   3624 HD11 LEU    64       6.488  36.093  22.436  1.00  0.00      6S   
ATOM   3625 HD12 LEU    64       7.760  36.898  21.446  1.00  0.00      6S   
ATOM   3626 HD13 LEU    64       7.760  35.106  21.637  1.00  0.00      6S   
ATOM   3627 CD2  LEU    64       5.554  34.480  20.245  1.00  1.00      6S   
ATOM   3628 HD21 LEU    64       4.950  34.377  19.318  1.00  0.00      6S   
ATOM   3629 HD22 LEU    64       4.891  34.346  21.125  1.00  0.00      6S   
ATOM   3630 HD23 LEU    64       6.326  33.683  20.258  1.00  0.00      6S   
ATOM   3631 C    LEU    64       6.495  38.715  19.096  1.00  1.00      6S   
ATOM   3632 O    LEU    64       5.963  39.013  18.029  1.00  1.00      6S   
ATOM   3633 N    LYS    65       7.836  38.668  19.252  1.00  1.00      6S   
ATOM   3634 HN   LYS    65       8.260  38.505  20.140  1.00  0.00      6S   
ATOM   3635 CA   LYS    65       8.732  38.864  18.145  1.00  1.00      6S   
ATOM   3636 HA   LYS    65       8.381  38.273  17.313  1.00  0.00      6S   
ATOM   3637 CB   LYS    65       8.843  40.342  17.721  1.00  1.00      6S   
ATOM   3638 HB1  LYS    65       7.843  40.679  17.364  1.00  0.00      6S   
ATOM   3639 HB2  LYS    65       9.553  40.441  16.871  1.00  0.00      6S   
ATOM   3640 CG   LYS    65       9.274  41.275  18.855  1.00  1.00      6S   
ATOM   3641 HG1  LYS    65      10.273  40.962  19.234  1.00  0.00      6S   
ATOM   3642 HG2  LYS    65       8.549  41.203  19.698  1.00  0.00      6S   
ATOM   3643 CD   LYS    65       9.358  42.727  18.391  1.00  1.00      6S   
ATOM   3644 HD1  LYS    65       8.360  43.040  18.012  1.00  0.00      6S   
ATOM   3645 HD2  LYS    65      10.086  42.784  17.551  1.00  0.00      6S   
ATOM   3646 CE   LYS    65       9.796  43.647  19.529  1.00  1.00      6S   
ATOM   3647 HE1  LYS    65      10.766  43.301  19.947  1.00  0.00      6S   
ATOM   3648 HE2  LYS    65       9.028  43.655  20.331  1.00  0.00      6S   
ATOM   3649 NZ   LYS    65       9.974  45.030  19.041  1.00  1.00      6S   
ATOM   3650 HZ1  LYS    65       9.074  45.378  18.651  1.00  0.00      6S   
ATOM   3651 HZ2  LYS    65      10.701  45.042  18.296  1.00  0.00      6S   
ATOM   3652 HZ3  LYS    65      10.272  45.638  19.829  1.00  0.00      6S   
ATOM   3653 C    LYS    65      10.091  38.354  18.527  1.00  1.00      6S   
ATOM   3654 O    LYS    65      10.472  38.365  19.698  1.00  1.00      6S   
ATOM   3655 N    PHE    66      10.850  37.874  17.517  1.00  1.00      6S   
ATOM   3656 HN   PHE    66      10.520  37.866  16.576  1.00  0.00      6S   
ATOM   3657 CA   PHE    66      12.158  37.302  17.726  1.00  1.00      6S   
ATOM   3658 HA   PHE    66      12.508  37.573  18.708  1.00  0.00      6S   
ATOM   3659 CB   PHE    66      12.175  35.767  17.551  1.00  1.00      6S   
ATOM   3660 HB1  PHE    66      13.211  35.376  17.630  1.00  0.00      6S   
ATOM   3661 HB2  PHE    66      11.761  35.483  16.559  1.00  0.00      6S   
ATOM   3662 CG   PHE    66      11.356  35.092  18.609  1.00  1.00      6S   
ATOM   3663 CD1  PHE    66      11.949  34.690  19.817  1.00  1.00      6S   
ATOM   3664 HD1  PHE    66      12.997  34.881  19.991  1.00  0.00      6S   
ATOM   3665 CE1  PHE    66      11.198  34.008  20.780  1.00  1.00      6S   
ATOM   3666 HE1  PHE    66      11.667  33.687  21.696  1.00  0.00      6S   
ATOM   3667 CZ   PHE    66       9.846  33.726  20.548  1.00  1.00      6S   
ATOM   3668 HZ   PHE    66       9.265  33.207  21.294  1.00  0.00      6S   
ATOM   3669 CD2  PHE    66       9.999  34.805  18.384  1.00  1.00      6S   
ATOM   3670 HD2  PHE    66       9.535  35.101  17.455  1.00  0.00      6S   
ATOM   3671 CE2  PHE    66       9.249  34.124  19.346  1.00  1.00      6S   
ATOM   3672 HE2  PHE    66       8.210  33.907  19.157  1.00  0.00      6S   
ATOM   3673 C    PHE    66      13.093  37.861  16.685  1.00  1.00      6S   
ATOM   3674 O    PHE    66      12.646  38.174  15.580  1.00  1.00      6S   
ATOM   3675 N    PRO    67      14.399  37.976  16.951  1.00  1.00      6S   
ATOM   3676 CD   PRO    67      15.004  37.926  18.283  1.00  1.00      6S   
ATOM   3677 HD1  PRO    67      15.235  36.869  18.534  1.00  0.00      6S   
ATOM   3678 HD2  PRO    67      14.347  38.372  19.060  1.00  0.00      6S   
ATOM   3679 CA   PRO    67      15.377  38.295  15.925  1.00  1.00      6S   
ATOM   3680 HA   PRO    67      15.049  39.162  15.371  1.00  0.00      6S   
ATOM   3681 CB   PRO    67      16.698  38.516  16.685  1.00  1.00      6S   
ATOM   3682 HB1  PRO    67      17.247  39.395  16.290  1.00  0.00      6S   
ATOM   3683 HB2  PRO    67      17.358  37.622  16.633  1.00  0.00      6S   
ATOM   3684 CG   PRO    67      16.285  38.742  18.143  1.00  1.00      6S   
ATOM   3685 HG1  PRO    67      17.069  38.419  18.855  1.00  0.00      6S   
ATOM   3686 HG2  PRO    67      16.055  39.817  18.305  1.00  0.00      6S   
ATOM   3687 C    PRO    67      15.504  37.135  14.984  1.00  1.00      6S   
ATOM   3688 O    PRO    67      15.096  36.024  15.326  1.00  1.00      6S   
ATOM   3689 N    ARG    68      16.072  37.373  13.788  1.00  1.00      6S   
ATOM   3690 HN   ARG    68      16.392  38.279  13.525  1.00  0.00      6S   
ATOM   3691 CA   ARG    68      16.197  36.340  12.798  1.00  1.00      6S   
ATOM   3692 HA   ARG    68      15.214  35.912  12.643  1.00  0.00      6S   
ATOM   3693 CB   ARG    68      16.685  36.888  11.450  1.00  1.00      6S   
ATOM   3694 HB1  ARG    68      15.909  37.572  11.037  1.00  0.00      6S   
ATOM   3695 HB2  ARG    68      16.783  36.031  10.751  1.00  0.00      6S   
ATOM   3696 CG   ARG    68      18.014  37.666  11.486  1.00  1.00      6S   
ATOM   3697 HG1  ARG    68      18.702  37.207  12.227  1.00  0.00      6S   
ATOM   3698 HG2  ARG    68      17.824  38.710  11.816  1.00  0.00      6S   
ATOM   3699 CD   ARG    68      18.759  37.657  10.144  1.00  1.00      6S   
ATOM   3700 HD1  ARG    68      19.125  36.631   9.925  1.00  0.00      6S   
ATOM   3701 HD2  ARG    68      19.630  38.344  10.178  1.00  0.00      6S   
ATOM   3702 NE   ARG    68      17.844  38.125   9.050  1.00  1.00      6S   
ATOM   3703 HE   ARG    68      17.693  39.107   8.944  1.00  0.00      6S   
ATOM   3704 CZ   ARG    68      17.230  37.275   8.177  1.00  1.00      6S   
ATOM   3705 NH1  ARG    68      16.427  37.784   7.208  1.00  1.00      6S   
ATOM   3706 HH11 ARG    68      16.306  38.772   7.138  1.00  0.00      6S   
ATOM   3707 HH12 ARG    68      15.969  37.165   6.574  1.00  0.00      6S   
ATOM   3708 NH2  ARG    68      17.393  35.929   8.267  1.00  1.00      6S   
ATOM   3709 HH21 ARG    68      17.961  35.559   9.001  1.00  0.00      6S   
ATOM   3710 HH22 ARG    68      16.915  35.318   7.641  1.00  0.00      6S   
ATOM   3711 C    ARG    68      17.118  35.245  13.286  1.00  1.00      6S   
ATOM   3712 O    ARG    68      18.216  35.500  13.778  1.00  1.00      6S   
ATOM   3713 N    GLY    69      16.638  33.986  13.214  1.00  1.00      6S   
ATOM   3714 HN   GLY    69      15.742  33.793  12.820  1.00  0.00      6S   
ATOM   3715 CA   GLY    69      17.392  32.852  13.695  1.00  1.00      6S   
ATOM   3716 HA1  GLY    69      18.429  33.125  13.820  1.00  0.00      6S   
ATOM   3717 HA2  GLY    69      17.263  32.067  12.971  1.00  0.00      6S   
ATOM   3718 C    GLY    69      16.884  32.335  15.008  1.00  1.00      6S   
ATOM   3719 O    GLY    69      17.262  31.237  15.412  1.00  1.00      6S   
ATOM   3720 N    GLN    70      16.035  33.108  15.724  1.00  1.00      6S   
ATOM   3721 HN   GLN    70      15.748  34.011  15.407  1.00  0.00      6S   
ATOM   3722 CA   GLN    70      15.542  32.717  17.023  1.00  1.00      6S   
ATOM   3723 HA   GLN    70      15.974  31.772  17.322  1.00  0.00      6S   
ATOM   3724 CB   GLN    70      15.864  33.767  18.108  1.00  1.00      6S   
ATOM   3725 HB1  GLN    70      15.610  33.345  19.104  1.00  0.00      6S   
ATOM   3726 HB2  GLN    70      15.245  34.677  17.943  1.00  0.00      6S   
ATOM   3727 CG   GLN    70      17.347  34.176  18.102  1.00  1.00      6S   
ATOM   3728 HG1  GLN    70      17.629  34.543  17.091  1.00  0.00      6S   
ATOM   3729 HG2  GLN    70      17.980  33.303  18.362  1.00  0.00      6S   
ATOM   3730 CD   GLN    70      17.591  35.292  19.116  1.00  1.00      6S   
ATOM   3731 OE1  GLN    70      16.922  35.382  20.148  1.00  1.00      6S   
ATOM   3732 NE2  GLN    70      18.579  36.176  18.796  1.00  1.00      6S   
ATOM   3733 HE21 GLN    70      18.775  36.937  19.413  1.00  0.00      6S   
ATOM   3734 HE22 GLN    70      19.063  36.081  17.927  1.00  0.00      6S   
ATOM   3735 C    GLN    70      14.056  32.535  16.944  1.00  1.00      6S   
ATOM   3736 O    GLN    70      13.410  32.985  15.999  1.00  1.00      6S   
ATOM   3737 N    GLY    71      13.484  31.856  17.965  1.00  1.00      6S   
ATOM   3738 HN   GLY    71      14.035  31.469  18.700  1.00  0.00      6S   
ATOM   3739 CA   GLY    71      12.057  31.732  18.117  1.00  1.00      6S   
ATOM   3740 HA1  GLY    71      11.558  32.403  17.440  1.00  0.00      6S   
ATOM   3741 HA2  GLY    71      11.831  31.951  19.148  1.00  0.00      6S   
ATOM   3742 C    GLY    71      11.562  30.356  17.853  1.00  1.00      6S   
ATOM   3743 O    GLY    71      10.482  30.002  18.305  1.00  1.00      6S   
ATOM   3744 N    VAL    72      12.315  29.514  17.120  1.00  1.00      6S   
ATOM   3745 HN   VAL    72      13.200  29.778  16.749  1.00  0.00      6S   
ATOM   3746 CA   VAL    72      11.859  28.179  16.811  1.00  1.00      6S   
ATOM   3747 HA   VAL    72      10.843  28.258  16.462  1.00  0.00      6S   
ATOM   3748 CB   VAL    72      12.669  27.542  15.701  1.00  1.00      6S   
ATOM   3749 HB   VAL    72      13.751  27.561  15.961  1.00  0.00      6S   
ATOM   3750 CG1  VAL    72      12.229  26.085  15.479  1.00  1.00      6S   
ATOM   3751 HG11 VAL    72      11.126  26.015  15.378  1.00  0.00      6S   
ATOM   3752 HG12 VAL    72      12.566  25.445  16.318  1.00  0.00      6S   
ATOM   3753 HG13 VAL    72      12.690  25.696  14.555  1.00  0.00      6S   
ATOM   3754 CG2  VAL    72      12.466  28.359  14.414  1.00  1.00      6S   
ATOM   3755 HG21 VAL    72      12.802  29.408  14.544  1.00  0.00      6S   
ATOM   3756 HG22 VAL    72      11.398  28.346  14.113  1.00  0.00      6S   
ATOM   3757 HG23 VAL    72      13.064  27.906  13.600  1.00  0.00      6S   
ATOM   3758 C    VAL    72      11.936  27.331  18.066  1.00  1.00      6S   
ATOM   3759 O    VAL    72      12.990  27.327  18.706  1.00  1.00      6S   
ATOM   3760 N    PRO    73      10.885  26.612  18.479  1.00  1.00      6S   
ATOM   3761 CD   PRO    73       9.533  26.667  17.918  1.00  1.00      6S   
ATOM   3762 HD1  PRO    73       9.467  25.925  17.093  1.00  0.00      6S   
ATOM   3763 HD2  PRO    73       9.258  27.678  17.551  1.00  0.00      6S   
ATOM   3764 CA   PRO    73      10.928  25.807  19.683  1.00  1.00      6S   
ATOM   3765 HA   PRO    73      11.271  26.423  20.500  1.00  0.00      6S   
ATOM   3766 CB   PRO    73       9.490  25.302  19.874  1.00  1.00      6S   
ATOM   3767 HB1  PRO    73       9.195  25.291  20.942  1.00  0.00      6S   
ATOM   3768 HB2  PRO    73       9.363  24.285  19.445  1.00  0.00      6S   
ATOM   3769 CG   PRO    73       8.622  26.268  19.072  1.00  1.00      6S   
ATOM   3770 HG1  PRO    73       7.683  25.792  18.729  1.00  0.00      6S   
ATOM   3771 HG2  PRO    73       8.386  27.163  19.685  1.00  0.00      6S   
ATOM   3772 C    PRO    73      11.865  24.643  19.521  1.00  1.00      6S   
ATOM   3773 O    PRO    73      12.185  24.251  18.400  1.00  1.00      6S   
ATOM   3774 N    ILE    74      12.313  24.082  20.653  1.00  1.00      6S   
ATOM   3775 HN   ILE    74      12.041  24.441  21.543  1.00  0.00      6S   
ATOM   3776 CA   ILE    74      13.236  22.981  20.663  1.00  1.00      6S   
ATOM   3777 HA   ILE    74      13.898  23.066  19.811  1.00  0.00      6S   
ATOM   3778 CB   ILE    74      14.070  22.972  21.937  1.00  1.00      6S   
ATOM   3779 HB   ILE    74      13.390  22.956  22.819  1.00  0.00      6S   
ATOM   3780 CG2  ILE    74      14.968  21.718  21.981  1.00  1.00      6S   
ATOM   3781 HG21 ILE    74      15.658  21.716  21.111  1.00  0.00      6S   
ATOM   3782 HG22 ILE    74      14.362  20.791  21.972  1.00  0.00      6S   
ATOM   3783 HG23 ILE    74      15.570  21.706  22.913  1.00  0.00      6S   
ATOM   3784 CG1  ILE    74      14.915  24.266  22.017  1.00  1.00      6S   
ATOM   3785 HG11 ILE    74      14.244  25.151  21.977  1.00  0.00      6S   
ATOM   3786 HG12 ILE    74      15.589  24.310  21.133  1.00  0.00      6S   
ATOM   3787 CD   ILE    74      15.759  24.361  23.290  1.00  1.00      6S   
ATOM   3788 HD1  ILE    74      16.483  23.525  23.360  1.00  0.00      6S   
ATOM   3789 HD2  ILE    74      15.108  24.351  24.189  1.00  0.00      6S   
ATOM   3790 HD3  ILE    74      16.346  25.299  23.286  1.00  0.00      6S   
ATOM   3791 C    ILE    74      12.430  21.715  20.527  1.00  1.00      6S   
ATOM   3792 O    ILE    74      11.505  21.469  21.300  1.00  1.00      6S   
ATOM   3793 N    ASN    75      12.771  20.888  19.515  1.00  1.00      6S   
ATOM   3794 HN   ASN    75      13.477  21.132  18.853  1.00  0.00      6S   
ATOM   3795 CA   ASN    75      12.155  19.601  19.331  1.00  1.00      6S   
ATOM   3796 HA   ASN    75      11.778  19.242  20.280  1.00  0.00      6S   
ATOM   3797 CB   ASN    75      11.001  19.669  18.302  1.00  1.00      6S   
ATOM   3798 HB1  ASN    75      11.379  20.063  17.338  1.00  0.00      6S   
ATOM   3799 HB2  ASN    75      10.248  20.386  18.685  1.00  0.00      6S   
ATOM   3800 CG   ASN    75      10.309  18.315  18.096  1.00  1.00      6S   
ATOM   3801 OD1  ASN    75      10.469  17.377  18.884  1.00  1.00      6S   
ATOM   3802 ND2  ASN    75       9.521  18.223  16.988  1.00  1.00      6S   
ATOM   3803 HD21 ASN    75       9.061  17.358  16.788  1.00  0.00      6S   
ATOM   3804 HD22 ASN    75       9.421  19.014  16.384  1.00  0.00      6S   
ATOM   3805 C    ASN    75      13.241  18.671  18.862  1.00  1.00      6S   
ATOM   3806 O    ASN    75      13.796  18.830  17.778  1.00  1.00      6S   
ATOM   3807 N    THR    76      13.558  17.645  19.680  1.00  1.00      6S   
ATOM   3808 HN   THR    76      13.109  17.524  20.563  1.00  0.00      6S   
ATOM   3809 CA   THR    76      14.591  16.677  19.378  1.00  1.00      6S   
ATOM   3810 HA   THR    76      15.455  17.223  19.023  1.00  0.00      6S   
ATOM   3811 CB   THR    76      14.990  15.851  20.593  1.00  1.00      6S   
ATOM   3812 HB   THR    76      15.741  15.080  20.307  1.00  0.00      6S   
ATOM   3813 OG1  THR    76      13.866  15.200  21.182  1.00  1.00      6S   
ATOM   3814 HG1  THR    76      13.765  14.370  20.710  1.00  0.00      6S   
ATOM   3815 CG2  THR    76      15.629  16.776  21.646  1.00  1.00      6S   
ATOM   3816 HG21 THR    76      14.917  17.560  21.976  1.00  0.00      6S   
ATOM   3817 HG22 THR    76      16.534  17.266  21.231  1.00  0.00      6S   
ATOM   3818 HG23 THR    76      15.928  16.180  22.535  1.00  0.00      6S   
ATOM   3819 C    THR    76      14.181  15.743  18.264  1.00  1.00      6S   
ATOM   3820 O    THR    76      15.030  15.222  17.546  1.00  1.00      6S   
ATOM   3821 N    ASN    77      12.859  15.528  18.082  1.00  1.00      6S   
ATOM   3822 HN   ASN    77      12.181  15.943  18.688  1.00  0.00      6S   
ATOM   3823 CA   ASN    77      12.336  14.688  17.030  1.00  1.00      6S   
ATOM   3824 HA   ASN    77      13.076  13.951  16.753  1.00  0.00      6S   
ATOM   3825 CB   ASN    77      11.038  13.981  17.488  1.00  1.00      6S   
ATOM   3826 HB1  ASN    77      10.542  13.474  16.633  1.00  0.00      6S   
ATOM   3827 HB2  ASN    77      10.343  14.734  17.920  1.00  0.00      6S   
ATOM   3828 CG   ASN    77      11.358  12.913  18.542  1.00  1.00      6S   
ATOM   3829 OD1  ASN    77      12.475  12.394  18.632  1.00  1.00      6S   
ATOM   3830 ND2  ASN    77      10.319  12.567  19.357  1.00  1.00      6S   
ATOM   3831 HD21 ASN    77      10.458  11.869  20.057  1.00  0.00      6S   
ATOM   3832 HD22 ASN    77       9.432  13.013  19.245  1.00  0.00      6S   
ATOM   3833 C    ASN    77      12.051  15.513  15.792  1.00  1.00      6S   
ATOM   3834 O    ASN    77      10.987  15.404  15.183  1.00  1.00      6S   
ATOM   3835 N    SER    78      13.025  16.347  15.365  1.00  1.00      6S   
ATOM   3836 HN   SER    78      13.882  16.453  15.870  1.00  0.00      6S   
ATOM   3837 CA   SER    78      12.897  17.105  14.146  1.00  1.00      6S   
ATOM   3838 HA   SER    78      12.465  16.465  13.390  1.00  0.00      6S   
ATOM   3839 CB   SER    78      12.020  18.366  14.306  1.00  1.00      6S   
ATOM   3840 HB1  SER    78      10.982  18.058  14.557  1.00  0.00      6S   
ATOM   3841 HB2  SER    78      11.996  18.953  13.366  1.00  0.00      6S   
ATOM   3842 OG   SER    78      12.506  19.205  15.342  1.00  1.00      6S   
ATOM   3843 HG1  SER    78      12.869  18.621  16.020  1.00  0.00      6S   
ATOM   3844 C    SER    78      14.274  17.484  13.681  1.00  1.00      6S   
ATOM   3845 O    SER    78      15.186  17.685  14.481  1.00  1.00      6S   
ATOM   3846 N    SER    79      14.450  17.580  12.347  1.00  1.00      6S   
ATOM   3847 HN   SER    79      13.695  17.457  11.706  1.00  0.00      6S   
ATOM   3848 CA   SER    79      15.738  17.821  11.742  1.00  1.00      6S   
ATOM   3849 HA   SER    79      16.487  17.353  12.363  1.00  0.00      6S   
ATOM   3850 CB   SER    79      15.809  17.206  10.324  1.00  1.00      6S   
ATOM   3851 HB1  SER    79      15.594  16.119  10.400  1.00  0.00      6S   
ATOM   3852 HB2  SER    79      16.815  17.341   9.886  1.00  0.00      6S   
ATOM   3853 OG   SER    79      14.865  17.774   9.431  1.00  1.00      6S   
ATOM   3854 HG1  SER    79      15.318  18.462   8.939  1.00  0.00      6S   
ATOM   3855 C    SER    79      16.020  19.301  11.659  1.00  1.00      6S   
ATOM   3856 O    SER    79      15.094  20.090  11.819  1.00  1.00      6S   
ATOM   3857 N    PRO    80      17.243  19.745  11.364  1.00  1.00      6S   
ATOM   3858 CD   PRO    80      18.463  18.946  11.509  1.00  1.00      6S   
ATOM   3859 HD1  PRO    80      18.626  18.379  10.568  1.00  0.00      6S   
ATOM   3860 HD2  PRO    80      18.414  18.249  12.374  1.00  0.00      6S   
ATOM   3861 CA   PRO    80      17.546  21.160  11.187  1.00  1.00      6S   
ATOM   3862 HA   PRO    80      17.232  21.688  12.071  1.00  0.00      6S   
ATOM   3863 CB   PRO    80      19.059  21.201  10.964  1.00  1.00      6S   
ATOM   3864 HB1  PRO    80      19.504  22.134  11.365  1.00  0.00      6S   
ATOM   3865 HB2  PRO    80      19.310  21.099   9.884  1.00  0.00      6S   
ATOM   3866 CG   PRO    80      19.578  19.969  11.706  1.00  1.00      6S   
ATOM   3867 HG1  PRO    80      20.547  19.618  11.301  1.00  0.00      6S   
ATOM   3868 HG2  PRO    80      19.676  20.202  12.788  1.00  0.00      6S   
ATOM   3869 C    PRO    80      16.830  21.763  10.014  1.00  1.00      6S   
ATOM   3870 O    PRO    80      16.594  22.969  10.010  1.00  1.00      6S   
ATOM   3871 N    ASP    81      16.437  20.933   9.030  1.00  1.00      6S   
ATOM   3872 HN   ASP    81      16.741  19.984   9.000  1.00  0.00      6S   
ATOM   3873 CA   ASP    81      15.719  21.364   7.864  1.00  1.00      6S   
ATOM   3874 HA   ASP    81      16.182  22.259   7.481  1.00  0.00      6S   
ATOM   3875 CB   ASP    81      15.712  20.289   6.750  1.00  1.00      6S   
ATOM   3876 HB1  ASP    81      15.172  20.686   5.863  1.00  0.00      6S   
ATOM   3877 HB2  ASP    81      15.171  19.382   7.085  1.00  0.00      6S   
ATOM   3878 CG   ASP    81      17.130  19.894   6.309  1.00  1.00      6S   
ATOM   3879 OD1  ASP    81      18.130  20.248   6.987  1.00  1.00      6S   
ATOM   3880 OD2  ASP    81      17.223  19.200   5.263  1.00  1.00      6S   
ATOM   3881 C    ASP    81      14.298  21.707   8.205  1.00  1.00      6S   
ATOM   3882 O    ASP    81      13.591  22.216   7.346  1.00  1.00      6S   
ATOM   3883 N    ASP    82      13.864  21.461   9.464  1.00  1.00      6S   
ATOM   3884 HN   ASP    82      14.483  21.090  10.154  1.00  0.00      6S   
ATOM   3885 CA   ASP    82      12.503  21.626   9.893  1.00  1.00      6S   
ATOM   3886 HA   ASP    82      11.894  21.793   9.037  1.00  0.00      6S   
ATOM   3887 CB   ASP    82      11.964  20.382  10.614  1.00  1.00      6S   
ATOM   3888 HB1  ASP    82      10.888  20.513  10.863  1.00  0.00      6S   
ATOM   3889 HB2  ASP    82      12.534  20.214  11.553  1.00  0.00      6S   
ATOM   3890 CG   ASP    82      12.083  19.139   9.748  1.00  1.00      6S   
ATOM   3891 OD1  ASP    82      11.995  19.212   8.494  1.00  1.00      6S   
ATOM   3892 OD2  ASP    82      12.219  18.057  10.376  1.00  1.00      6S   
ATOM   3893 C    ASP    82      12.316  22.797  10.815  1.00  1.00      6S   
ATOM   3894 O    ASP    82      11.198  23.049  11.260  1.00  1.00      6S   
ATOM   3895 N    GLN    83      13.391  23.548  11.133  1.00  1.00      6S   
ATOM   3896 HN   GLN    83      14.285  23.388  10.721  1.00  0.00      6S   
ATOM   3897 CA   GLN    83      13.348  24.541  12.179  1.00  1.00      6S   
ATOM   3898 HA   GLN    83      12.634  24.236  12.931  1.00  0.00      6S   
ATOM   3899 CB   GLN    83      14.725  24.689  12.856  1.00  1.00      6S   
ATOM   3900 HB1  GLN    83      14.644  25.383  13.719  1.00  0.00      6S   
ATOM   3901 HB2  GLN    83      15.450  25.111  12.125  1.00  0.00      6S   
ATOM   3902 CG   GLN    83      15.307  23.360  13.359  1.00  1.00      6S   
ATOM   3903 HG1  GLN    83      16.271  23.541  13.878  1.00  0.00      6S   
ATOM   3904 HG2  GLN    83      15.495  22.708  12.481  1.00  0.00      6S   
ATOM   3905 CD   GLN    83      14.337  22.676  14.325  1.00  1.00      6S   
ATOM   3906 OE1  GLN    83      13.876  23.266  15.306  1.00  1.00      6S   
ATOM   3907 NE2  GLN    83      14.022  21.386  14.024  1.00  1.00      6S   
ATOM   3908 HE21 GLN    83      13.408  20.864  14.615  1.00  0.00      6S   
ATOM   3909 HE22 GLN    83      14.430  20.953  13.216  1.00  0.00      6S   
ATOM   3910 C    GLN    83      12.892  25.867  11.638  1.00  1.00      6S   
ATOM   3911 O    GLN    83      13.671  26.806  11.507  1.00  1.00      6S   
ATOM   3912 N    ILE    84      11.592  25.958  11.302  1.00  1.00      6S   
ATOM   3913 HN   ILE    84      10.983  25.174  11.414  1.00  0.00      6S   
ATOM   3914 CA   ILE    84      11.035  27.109  10.648  1.00  1.00      6S   
ATOM   3915 HA   ILE    84      11.321  27.978  11.219  1.00  0.00      6S   
ATOM   3916 CB   ILE    84      11.504  27.263   9.198  1.00  1.00      6S   
ATOM   3917 HB   ILE    84      12.590  27.522   9.218  1.00  0.00      6S   
ATOM   3918 CG2  ILE    84      11.361  25.936   8.437  1.00  1.00      6S   
ATOM   3919 HG21 ILE    84      10.287  25.722   8.257  1.00  0.00      6S   
ATOM   3920 HG22 ILE    84      11.815  25.093   8.992  1.00  0.00      6S   
ATOM   3921 HG23 ILE    84      11.879  25.998   7.459  1.00  0.00      6S   
ATOM   3922 CG1  ILE    84      10.772  28.393   8.448  1.00  1.00      6S   
ATOM   3923 HG11 ILE    84      10.903  29.337   9.013  1.00  0.00      6S   
ATOM   3924 HG12 ILE    84       9.684  28.169   8.412  1.00  0.00      6S   
ATOM   3925 CD   ILE    84      11.276  28.570   7.017  1.00  1.00      6S   
ATOM   3926 HD1  ILE    84      10.969  27.705   6.391  1.00  0.00      6S   
ATOM   3927 HD2  ILE    84      12.384  28.642   7.003  1.00  0.00      6S   
ATOM   3928 HD3  ILE    84      10.845  29.490   6.573  1.00  0.00      6S   
ATOM   3929 C    ILE    84       9.537  26.987  10.745  1.00  1.00      6S   
ATOM   3930 O    ILE    84       8.963  25.915  10.555  1.00  1.00      6S   
ATOM   3931 N    GLY    85       8.861  28.112  11.064  1.00  1.00      6S   
ATOM   3932 HN   GLY    85       9.326  28.987  11.210  1.00  0.00      6S   
ATOM   3933 CA   GLY    85       7.430  28.107  11.179  1.00  1.00      6S   
ATOM   3934 HA1  GLY    85       7.159  27.382  11.932  1.00  0.00      6S   
ATOM   3935 HA2  GLY    85       7.014  27.913  10.201  1.00  0.00      6S   
ATOM   3936 C    GLY    85       6.961  29.448  11.628  1.00  1.00      6S   
ATOM   3937 O    GLY    85       7.682  30.439  11.550  1.00  1.00      6S   
ATOM   3938 N    TYR    86       5.701  29.503  12.099  1.00  1.00      6S   
ATOM   3939 HN   TYR    86       5.139  28.680  12.174  1.00  0.00      6S   
ATOM   3940 CA   TYR    86       5.059  30.733  12.474  1.00  1.00      6S   
ATOM   3941 HA   TYR    86       5.804  31.510  12.562  1.00  0.00      6S   
ATOM   3942 CB   TYR    86       3.989  31.197  11.446  1.00  1.00      6S   
ATOM   3943 HB1  TYR    86       4.463  31.301  10.455  1.00  0.00      6S   
ATOM   3944 HB2  TYR    86       3.574  32.185  11.732  1.00  0.00      6S   
ATOM   3945 CG   TYR    86       2.851  30.231  11.291  1.00  1.00      6S   
ATOM   3946 CD1  TYR    86       2.976  29.094  10.476  1.00  1.00      6S   
ATOM   3947 HD1  TYR    86       3.897  28.908   9.945  1.00  0.00      6S   
ATOM   3948 CE1  TYR    86       1.914  28.195  10.355  1.00  1.00      6S   
ATOM   3949 HE1  TYR    86       2.024  27.319   9.733  1.00  0.00      6S   
ATOM   3950 CZ   TYR    86       0.723  28.438  11.051  1.00  1.00      6S   
ATOM   3951 OH   TYR    86      -0.345  27.543  10.959  1.00  1.00      6S   
ATOM   3952 HH   TYR    86      -0.060  26.829  10.373  1.00  0.00      6S   
ATOM   3953 CD2  TYR    86       1.655  30.450  11.994  1.00  1.00      6S   
ATOM   3954 HD2  TYR    86       1.557  31.313  12.636  1.00  0.00      6S   
ATOM   3955 CE2  TYR    86       0.594  29.552  11.881  1.00  1.00      6S   
ATOM   3956 HE2  TYR    86      -0.323  29.717  12.426  1.00  0.00      6S   
ATOM   3957 C    TYR    86       4.417  30.581  13.820  1.00  1.00      6S   
ATOM   3958 O    TYR    86       3.937  29.510  14.181  1.00  1.00      6S   
ATOM   3959 N    TYR    87       4.358  31.693  14.575  1.00  1.00      6S   
ATOM   3960 HN   TYR    87       4.840  32.523  14.300  1.00  0.00      6S   
ATOM   3961 CA   TYR    87       3.541  31.802  15.754  1.00  1.00      6S   
ATOM   3962 HA   TYR    87       3.312  30.819  16.135  1.00  0.00      6S   
ATOM   3963 CB   TYR    87       4.211  32.648  16.847  1.00  1.00      6S   
ATOM   3964 HB1  TYR    87       3.480  32.997  17.604  1.00  0.00      6S   
ATOM   3965 HB2  TYR    87       4.694  33.524  16.390  1.00  0.00      6S   
ATOM   3966 CG   TYR    87       5.268  31.876  17.559  1.00  1.00      6S   
ATOM   3967 CD1  TYR    87       6.590  31.838  17.087  1.00  1.00      6S   
ATOM   3968 HD1  TYR    87       6.859  32.349  16.174  1.00  0.00      6S   
ATOM   3969 CE1  TYR    87       7.569  31.141  17.800  1.00  1.00      6S   
ATOM   3970 HE1  TYR    87       8.575  31.121  17.421  1.00  0.00      6S   
ATOM   3971 CZ   TYR    87       7.234  30.484  18.992  1.00  1.00      6S   
ATOM   3972 OH   TYR    87       8.205  29.776  19.721  1.00  1.00      6S   
ATOM   3973 HH   TYR    87       9.034  29.842  19.233  1.00  0.00      6S   
ATOM   3974 CD2  TYR    87       4.943  31.215  18.751  1.00  1.00      6S   
ATOM   3975 HD2  TYR    87       3.933  31.243  19.129  1.00  0.00      6S   
ATOM   3976 CE2  TYR    87       5.923  30.532  19.469  1.00  1.00      6S   
ATOM   3977 HE2  TYR    87       5.649  30.028  20.381  1.00  0.00      6S   
ATOM   3978 C    TYR    87       2.252  32.486  15.380  1.00  1.00      6S   
ATOM   3979 O    TYR    87       2.237  33.407  14.568  1.00  1.00      6S   
ATOM   3980 N    ARG    88       1.132  32.032  15.981  1.00  1.00      6S   
ATOM   3981 HN   ARG    88       1.166  31.255  16.611  1.00  0.00      6S   
ATOM   3982 CA   ARG    88      -0.179  32.554  15.722  1.00  1.00      6S   
ATOM   3983 HA   ARG    88      -0.105  33.426  15.097  1.00  0.00      6S   
ATOM   3984 CB   ARG    88      -1.080  31.519  15.033  1.00  1.00      6S   
ATOM   3985 HB1  ARG    88      -1.079  30.572  15.618  1.00  0.00      6S   
ATOM   3986 HB2  ARG    88      -0.653  31.296  14.030  1.00  0.00      6S   
ATOM   3987 CG   ARG    88      -2.527  31.982  14.841  1.00  1.00      6S   
ATOM   3988 HG1  ARG    88      -2.542  32.936  14.269  1.00  0.00      6S   
ATOM   3989 HG2  ARG    88      -2.985  32.175  15.838  1.00  0.00      6S   
ATOM   3990 CD   ARG    88      -3.329  30.912  14.110  1.00  1.00      6S   
ATOM   3991 HD1  ARG    88      -3.224  29.931  14.624  1.00  0.00      6S   
ATOM   3992 HD2  ARG    88      -2.981  30.813  13.061  1.00  0.00      6S   
ATOM   3993 NE   ARG    88      -4.763  31.317  14.089  1.00  1.00      6S   
ATOM   3994 HE   ARG    88      -5.111  31.812  13.294  1.00  0.00      6S   
ATOM   3995 CZ   ARG    88      -5.618  31.028  15.109  1.00  1.00      6S   
ATOM   3996 NH1  ARG    88      -5.196  30.365  16.218  1.00  1.00      6S   
ATOM   3997 HH11 ARG    88      -4.236  30.101  16.290  1.00  0.00      6S   
ATOM   3998 HH12 ARG    88      -5.838  30.163  16.954  1.00  0.00      6S   
ATOM   3999 NH2  ARG    88      -6.917  31.405  15.007  1.00  1.00      6S   
ATOM   4000 HH21 ARG    88      -7.221  31.893  14.192  1.00  0.00      6S   
ATOM   4001 HH22 ARG    88      -7.552  31.200  15.749  1.00  0.00      6S   
ATOM   4002 C    ARG    88      -0.818  32.961  17.012  1.00  1.00      6S   
ATOM   4003 O    ARG    88      -0.900  32.182  17.956  1.00  1.00      6S   
ATOM   4004 N    ARG    89      -1.328  34.206  17.063  1.00  1.00      6S   
ATOM   4005 HN   ARG    89      -1.277  34.815  16.270  1.00  0.00      6S   
ATOM   4006 CA   ARG    89      -1.952  34.757  18.233  1.00  1.00      6S   
ATOM   4007 HA   ARG    89      -1.420  34.412  19.109  1.00  0.00      6S   
ATOM   4008 CB   ARG    89      -1.893  36.287  18.182  1.00  1.00      6S   
ATOM   4009 HB1  ARG    89      -2.352  36.635  17.231  1.00  0.00      6S   
ATOM   4010 HB2  ARG    89      -0.828  36.582  18.152  1.00  0.00      6S   
ATOM   4011 CG   ARG    89      -2.525  37.013  19.373  1.00  1.00      6S   
ATOM   4012 HG1  ARG    89      -1.997  36.710  20.305  1.00  0.00      6S   
ATOM   4013 HG2  ARG    89      -3.594  36.728  19.466  1.00  0.00      6S   
ATOM   4014 CD   ARG    89      -2.418  38.526  19.226  1.00  1.00      6S   
ATOM   4015 HD1  ARG    89      -1.354  38.811  19.087  1.00  0.00      6S   
ATOM   4016 HD2  ARG    89      -2.855  39.055  20.095  1.00  0.00      6S   
ATOM   4017 NE   ARG    89      -3.192  38.921  18.019  1.00  1.00      6S   
ATOM   4018 HE   ARG    89      -3.923  38.327  17.682  1.00  0.00      6S   
ATOM   4019 CZ   ARG    89      -2.902  40.050  17.324  1.00  1.00      6S   
ATOM   4020 NH1  ARG    89      -1.878  40.868  17.673  1.00  1.00      6S   
ATOM   4021 HH11 ARG    89      -1.329  40.658  18.481  1.00  0.00      6S   
ATOM   4022 HH12 ARG    89      -1.712  41.704  17.152  1.00  0.00      6S   
ATOM   4023 NH2  ARG    89      -3.663  40.352  16.252  1.00  1.00      6S   
ATOM   4024 HH21 ARG    89      -4.456  39.798  16.010  1.00  0.00      6S   
ATOM   4025 HH22 ARG    89      -3.408  41.103  15.637  1.00  0.00      6S   
ATOM   4026 C    ARG    89      -3.395  34.340  18.323  1.00  1.00      6S   
ATOM   4027 O    ARG    89      -4.129  34.364  17.336  1.00  1.00      6S   
ATOM   4028 N    ALA    90      -3.823  33.952  19.543  1.00  1.00      6S   
ATOM   4029 HN   ALA    90      -3.181  33.889  20.309  1.00  0.00      6S   
ATOM   4030 CA   ALA    90      -5.182  33.596  19.843  1.00  1.00      6S   
ATOM   4031 HA   ALA    90      -5.824  33.894  19.027  1.00  0.00      6S   
ATOM   4032 CB   ALA    90      -5.328  32.087  20.094  1.00  1.00      6S   
ATOM   4033 HB1  ALA    90      -4.682  31.766  20.938  1.00  0.00      6S   
ATOM   4034 HB2  ALA    90      -5.012  31.530  19.186  1.00  0.00      6S   
ATOM   4035 HB3  ALA    90      -6.382  31.825  20.321  1.00  0.00      6S   
ATOM   4036 C    ALA    90      -5.601  34.349  21.079  1.00  1.00      6S   
ATOM   4037 O    ALA    90      -5.117  34.087  22.181  1.00  1.00      6S   
ATOM   4038 N    THR    91      -6.516  35.330  20.903  1.00  1.00      6S   
ATOM   4039 HN   THR    91      -6.880  35.540  20.000  1.00  0.00      6S   
ATOM   4040 CA   THR    91      -6.937  36.234  21.953  1.00  1.00      6S   
ATOM   4041 HA   THR    91      -6.282  36.115  22.805  1.00  0.00      6S   
ATOM   4042 CB   THR    91      -6.919  37.696  21.515  1.00  1.00      6S   
ATOM   4043 HB   THR    91      -7.884  37.990  21.045  1.00  0.00      6S   
ATOM   4044 OG1  THR    91      -5.877  37.923  20.572  1.00  1.00      6S   
ATOM   4045 HG1  THR    91      -5.855  38.871  20.428  1.00  0.00      6S   
ATOM   4046 CG2  THR    91      -6.647  38.589  22.732  1.00  1.00      6S   
ATOM   4047 HG21 THR    91      -5.671  38.331  23.188  1.00  0.00      6S   
ATOM   4048 HG22 THR    91      -7.432  38.449  23.500  1.00  0.00      6S   
ATOM   4049 HG23 THR    91      -6.630  39.660  22.434  1.00  0.00      6S   
ATOM   4050 C    THR    91      -8.333  35.859  22.374  1.00  1.00      6S   
ATOM   4051 O    THR    91      -9.172  35.523  21.539  1.00  1.00      6S   
ATOM   4052 N    ARG    92      -8.605  35.900  23.696  1.00  1.00      6S   
ATOM   4053 HN   ARG    92      -7.919  36.186  24.362  1.00  0.00      6S   
ATOM   4054 CA   ARG    92      -9.886  35.531  24.245  1.00  1.00      6S   
ATOM   4055 HA   ARG    92     -10.636  35.529  23.467  1.00  0.00      6S   
ATOM   4056 CB   ARG    92      -9.862  34.143  24.915  1.00  1.00      6S   
ATOM   4057 HB1  ARG    92      -9.594  33.401  24.130  1.00  0.00      6S   
ATOM   4058 HB2  ARG    92     -10.867  33.872  25.305  1.00  0.00      6S   
ATOM   4059 CG   ARG    92      -8.846  34.010  26.054  1.00  1.00      6S   
ATOM   4060 HG1  ARG    92      -9.294  34.410  26.985  1.00  0.00      6S   
ATOM   4061 HG2  ARG    92      -7.953  34.632  25.826  1.00  0.00      6S   
ATOM   4062 CD   ARG    92      -8.422  32.550  26.244  1.00  1.00      6S   
ATOM   4063 HD1  ARG    92      -7.914  32.168  25.332  1.00  0.00      6S   
ATOM   4064 HD2  ARG    92      -9.302  31.915  26.474  1.00  0.00      6S   
ATOM   4065 NE   ARG    92      -7.478  32.441  27.389  1.00  1.00      6S   
ATOM   4066 HE   ARG    92      -7.787  32.007  28.235  1.00  0.00      6S   
ATOM   4067 CZ   ARG    92      -6.198  32.891  27.312  1.00  1.00      6S   
ATOM   4068 NH1  ARG    92      -5.376  32.721  28.366  1.00  1.00      6S   
ATOM   4069 HH11 ARG    92      -5.719  32.292  29.207  1.00  0.00      6S   
ATOM   4070 HH12 ARG    92      -4.434  33.044  28.345  1.00  0.00      6S   
ATOM   4071 NH2  ARG    92      -5.701  33.485  26.201  1.00  1.00      6S   
ATOM   4072 HH21 ARG    92      -4.800  33.918  26.252  1.00  0.00      6S   
ATOM   4073 HH22 ARG    92      -6.253  33.524  25.374  1.00  0.00      6S   
ATOM   4074 C    ARG    92     -10.296  36.559  25.246  1.00  1.00      6S   
ATOM   4075 O    ARG    92      -9.511  37.405  25.666  1.00  1.00      6S   
ATOM   4076 N    ARG    93     -11.581  36.501  25.637  1.00  1.00      6S   
ATOM   4077 HN   ARG    93     -12.205  35.793  25.321  1.00  0.00      6S   
ATOM   4078 CA   ARG    93     -12.162  37.401  26.573  1.00  1.00      6S   
ATOM   4079 HA   ARG    93     -11.426  38.120  26.893  1.00  0.00      6S   
ATOM   4080 CB   ARG    93     -13.253  38.277  25.867  1.00  1.00      6S   
ATOM   4081 HB1  ARG    93     -13.602  39.075  26.563  1.00  0.00      6S   
ATOM   4082 HB2  ARG    93     -14.134  37.654  25.603  1.00  0.00      6S   
ATOM   4083 CG   ARG    93     -12.794  38.988  24.574  1.00  1.00      6S   
ATOM   4084 HG1  ARG    93     -13.295  38.503  23.705  1.00  0.00      6S   
ATOM   4085 HG2  ARG    93     -11.696  38.881  24.439  1.00  0.00      6S   
ATOM   4086 CD   ARG    93     -13.129  40.480  24.606  1.00  1.00      6S   
ATOM   4087 HD1  ARG    93     -12.431  41.008  25.293  1.00  0.00      6S   
ATOM   4088 HD2  ARG    93     -14.181  40.634  24.931  1.00  0.00      6S   
ATOM   4089 NE   ARG    93     -12.979  41.058  23.239  1.00  1.00      6S   
ATOM   4090 HE   ARG    93     -12.771  40.456  22.470  1.00  0.00      6S   
ATOM   4091 CZ   ARG    93     -13.152  42.389  23.009  1.00  1.00      6S   
ATOM   4092 NH1  ARG    93     -13.445  43.241  24.026  1.00  1.00      6S   
ATOM   4093 HH11 ARG    93     -13.541  42.878  24.949  1.00  0.00      6S   
ATOM   4094 HH12 ARG    93     -13.566  44.214  23.840  1.00  0.00      6S   
ATOM   4095 NH2  ARG    93     -13.031  42.868  21.745  1.00  1.00      6S   
ATOM   4096 HH21 ARG    93     -12.816  42.238  21.002  1.00  0.00      6S   
ATOM   4097 HH22 ARG    93     -13.151  43.843  21.571  1.00  0.00      6S   
ATOM   4098 C    ARG    93     -12.617  36.455  27.744  1.00  1.00      6S   
ATOM   4099 O    ARG    93     -13.015  35.326  27.465  1.00  1.00      6S   
ATOM   4100 N    ILE    94     -12.702  37.010  29.033  1.00  1.00      6S   
ATOM   4101 HN   ILE    94     -12.334  37.922  29.033  1.00  0.00      6S   
ATOM   4102 CA   ILE    94     -13.170  36.815  30.470  1.00  1.00      6S   
ATOM   4103 HA   ILE    94     -13.290  35.721  30.446  1.00  0.00      6S   
ATOM   4104 CB   ILE    94     -12.253  37.138  31.647  1.00  1.00      6S   
ATOM   4105 HB   ILE    94     -12.677  37.494  32.630  1.00  0.00      6S   
ATOM   4106 CG2  ILE    94     -11.369  38.019  30.905  1.00  0.00      6S   
ATOM   4107 HG21 ILE    94     -12.306  38.884  30.518  1.00  0.00      6S   
ATOM   4108 HG22 ILE    94     -10.985  36.853  30.304  1.00  0.00      6S   
ATOM   4109 HG23 ILE    94      -9.976  38.962  31.213  1.00  0.00      6S   
ATOM   4110 CG1  ILE    94     -11.217  37.994  31.622  1.00  0.00      6S   
ATOM   4111 HG11 ILE    94     -10.374  37.329  32.219  1.00  0.00      6S   
ATOM   4112 HG12 ILE    94     -11.426  38.987  32.383  1.00  0.00      6S   
ATOM   4113 CD   ILE    94     -10.564  38.640  29.361  1.00  0.00      6S   
ATOM   4114 HD1  ILE    94     -11.524  38.910  28.929  1.00  0.00      6S   
ATOM   4115 HD2  ILE    94     -10.489  37.844  28.649  1.00  0.00      6S   
ATOM   4116 HD3  ILE    94      -9.820  39.373  29.431  1.00  0.00      6S   
ATOM   4117 C    ILE    94     -14.355  37.603  31.273  1.00  1.00      6S   
ATOM   4118 O    ILE    94     -14.851  36.739  32.011  1.00  1.00      6S   
ATOM   4119 N    ARG    95     -15.105  38.961  30.952  1.00  1.00      6S   
ATOM   4120 HN   ARG    95     -14.510  39.371  30.260  1.00  0.00      6S   
ATOM   4121 CA   ARG    95     -16.957  39.299  30.735  1.00  1.00      6S   
ATOM   4122 HA   ARG    95     -16.943  40.387  30.506  1.00  0.00      6S   
ATOM   4123 CB   ARG    95     -18.406  38.188  29.449  1.00  1.00      6S   
ATOM   4124 HB1  ARG    95     -18.629  38.588  28.462  1.00  0.00      6S   
ATOM   4125 HB2  ARG    95     -18.748  37.316  29.998  1.00  0.00      6S   
ATOM   4126 CG   ARG    95     -17.803  36.761  28.092  1.00  0.00      6S   
ATOM   4127 HG1  ARG    95     -17.464  37.069  27.119  1.00  0.00      6S   
ATOM   4128 HG2  ARG    95     -17.664  35.800  28.679  1.00  0.00      6S   
ATOM   4129 CD   ARG    95     -15.922  36.322  27.871  1.00  0.00      6S   
ATOM   4130 HD1  ARG    95     -15.354  36.249  26.973  1.00  0.00      6S   
ATOM   4131 HD2  ARG    95     -15.398  35.627  28.638  1.00  0.00      6S   
ATOM   4132 NE   ARG    95     -15.039  37.492  28.103  1.00  0.00      6S   
ATOM   4133 HE   ARG    95     -14.292  37.637  28.804  1.00  0.00      6S   
ATOM   4134 CZ   ARG    95     -15.851  37.944  28.773  1.00  0.00      6S   
ATOM   4135 NH1  ARG    95     -16.267  37.072  29.925  1.00  0.00      6S   
ATOM   4136 HH11 ARG    95     -17.097  37.184  30.528  1.00  0.00      6S   
ATOM   4137 HH12 ARG    95     -16.877  37.850  29.920  1.00  0.00      6S   
ATOM   4138 NH2  ARG    95     -16.331  39.130  28.253  1.00  0.00      6S   
ATOM   4139 HH21 ARG    95     -16.896  39.474  29.004  1.00  0.00      6S   
ATOM   4140 HH22 ARG    95     -17.246  38.937  27.869  1.00  0.00      6S   
ATOM   4141 C    ARG    95     -17.143  39.113  32.112  1.00  1.00      6S   
ATOM   4142 O    ARG    95     -18.162  38.587  32.509  1.00  1.00      6S   
ATOM   4143 N    GLY    96     -16.072  39.479  32.862  1.00  1.00      6S   
ATOM   4144 HN   GLY    96     -15.173  39.677  32.446  1.00  0.00      6S   
ATOM   4145 CA   GLY    96     -16.022  39.507  34.223  1.00  1.00      6S   
ATOM   4146 HA1  GLY    96     -15.012  39.259  34.513  1.00  0.00      6S   
ATOM   4147 HA2  GLY    96     -16.824  38.867  34.545  1.00  0.00      6S   
ATOM   4148 C    GLY    96     -16.331  40.945  34.321  1.00  1.00      6S   
ATOM   4149 O    GLY    96     -15.530  41.824  34.013  1.00  1.00      6S   
ATOM   4150 N    GLY    97     -17.577  41.206  34.714  1.00  1.00      6S   
ATOM   4151 HN   GLY    97     -18.218  40.462  34.865  1.00  0.00      6S   
ATOM   4152 CA   GLY    97     -17.998  42.528  35.059  1.00  1.00      6S   
ATOM   4153 HA1  GLY    97     -19.059  42.455  35.239  1.00  0.00      6S   
ATOM   4154 HA2  GLY    97     -17.752  43.203  34.245  1.00  0.00      6S   
ATOM   4155 C    GLY    97     -17.315  42.918  36.391  1.00  1.00      6S   
ATOM   4156 OT1  GLY    97     -17.988  43.600  37.201  1.00  1.00      6S   
ATOM   4157 OT2  GLY    97     -16.153  42.505  36.654  1.00  0.00      6S   
TER 
ATOM   4158 N    LYS   102     -13.053  42.023  28.180  1.00  1.00      7S   
ATOM   4159 HT1  LYS   102     -12.781  42.812  27.533  1.00  0.00      7S   
ATOM   4160 HT2  LYS   102     -13.645  42.844  28.393  1.00  0.00      7S   
ATOM   4161 HT3  LYS   102     -13.977  41.621  28.387  1.00  0.00      7S   
ATOM   4162 CA   LYS   102     -12.007  41.689  29.517  1.00  1.00      7S   
ATOM   4163 HA   LYS   102     -11.416  42.520  29.910  1.00  0.00      7S   
ATOM   4164 CB   LYS   102     -12.123  41.553  31.161  1.00  1.00      7S   
ATOM   4165 HB1  LYS   102     -11.569  42.275  31.840  1.00  0.00      7S   
ATOM   4166 HB2  LYS   102     -11.566  40.651  31.421  1.00  0.00      7S   
ATOM   4167 CG   LYS   102     -13.472  41.577  31.859  1.00  0.00      7S   
ATOM   4168 HG1  LYS   102     -13.493  42.117  32.836  1.00  0.00      7S   
ATOM   4169 HG2  LYS   102     -13.691  40.514  32.123  1.00  0.00      7S   
ATOM   4170 CD   LYS   102     -14.580  42.237  31.075  1.00  0.00      7S   
ATOM   4171 HD1  LYS   102     -15.362  42.720  31.686  1.00  0.00      7S   
ATOM   4172 HD2  LYS   102     -15.107  41.342  30.660  1.00  0.00      7S   
ATOM   4173 CE   LYS   102     -14.345  43.404  30.046  1.00  0.00      7S   
ATOM   4174 HE1  LYS   102     -15.124  44.095  29.886  1.00  0.00      7S   
ATOM   4175 HE2  LYS   102     -14.698  42.620  29.331  1.00  0.00      7S   
ATOM   4176 NZ   LYS   102     -12.965  44.111  29.564  1.00  0.00      7S   
ATOM   4177 HZ1  LYS   102     -12.600  43.221  29.181  1.00  0.00      7S   
ATOM   4178 HZ2  LYS   102     -12.204  43.932  30.246  1.00  0.00      7S   
ATOM   4179 HZ3  LYS   102     -12.631  44.124  28.553  1.00  0.00      7S   
ATOM   4180 C    LYS   102     -11.128  41.286  28.536  1.00  1.00      7S   
ATOM   4181 O    LYS   102     -11.551  40.455  27.747  1.00  1.00      7S   
ATOM   4182 N    ASP   103      -9.980  41.869  28.283  1.00  1.00      7S   
ATOM   4183 HN   ASP   103      -9.774  42.832  28.444  1.00  0.00      7S   
ATOM   4184 CA   ASP   103      -9.270  41.155  27.257  1.00  1.00      7S   
ATOM   4185 HA   ASP   103      -9.852  40.422  26.706  1.00  0.00      7S   
ATOM   4186 CB   ASP   103      -8.718  42.086  26.193  1.00  1.00      7S   
ATOM   4187 HB1  ASP   103      -7.914  42.693  26.648  1.00  0.00      7S   
ATOM   4188 HB2  ASP   103      -9.526  42.759  25.828  1.00  0.00      7S   
ATOM   4189 CG   ASP   103      -8.184  41.294  25.002  1.00  1.00      7S   
ATOM   4190 OD1  ASP   103      -8.374  40.051  24.960  1.00  1.00      7S   
ATOM   4191 OD2  ASP   103      -7.586  41.939  24.105  1.00  1.00      7S   
ATOM   4192 C    ASP   103      -8.211  40.418  27.994  1.00  1.00      7S   
ATOM   4193 O    ASP   103      -7.494  41.011  28.793  1.00  1.00      7S   
ATOM   4194 N    LEU   104      -8.169  39.072  27.808  1.00  1.00      7S   
ATOM   4195 HN   LEU   104      -8.872  38.606  27.270  1.00  0.00      7S   
ATOM   4196 CA   LEU   104      -7.281  38.224  28.556  1.00  1.00      7S   
ATOM   4197 HA   LEU   104      -7.159  38.642  29.547  1.00  0.00      7S   
ATOM   4198 CB   LEU   104      -7.621  36.699  28.584  1.00  1.00      7S   
ATOM   4199 HB1  LEU   104      -6.740  36.063  28.788  1.00  0.00      7S   
ATOM   4200 HB2  LEU   104      -8.092  36.437  27.610  1.00  0.00      7S   
ATOM   4201 CG   LEU   104      -8.570  36.288  29.693  1.00  1.00      7S   
ATOM   4202 HG   LEU   104      -9.432  36.708  29.264  1.00  0.00      7S   
ATOM   4203 CD1  LEU   104      -9.130  34.870  29.755  1.00  1.00      7S   
ATOM   4204 HD11 LEU   104      -8.279  34.179  29.694  1.00  0.00      7S   
ATOM   4205 HD12 LEU   104      -9.848  34.705  28.918  1.00  0.00      7S   
ATOM   4206 HD13 LEU   104      -9.708  34.736  30.698  1.00  0.00      7S   
ATOM   4207 CD2  LEU   104      -8.212  36.878  31.058  1.00  1.00      7S   
ATOM   4208 HD21 LEU   104      -8.433  37.960  31.089  1.00  0.00      7S   
ATOM   4209 HD22 LEU   104      -7.140  36.788  31.268  1.00  0.00      7S   
ATOM   4210 HD23 LEU   104      -8.770  36.355  31.859  1.00  0.00      7S   
ATOM   4211 C    LEU   104      -5.997  38.298  27.854  1.00  1.00      7S   
ATOM   4212 O    LEU   104      -5.898  38.779  26.727  1.00  1.00      7S   
ATOM   4213 N    SER   105      -4.965  37.782  28.532  1.00  1.00      7S   
ATOM   4214 HN   SER   105      -5.079  37.404  29.448  1.00  0.00      7S   
ATOM   4215 CA   SER   105      -3.636  37.785  28.014  1.00  1.00      7S   
ATOM   4216 HA   SER   105      -3.405  38.812  27.794  1.00  0.00      7S   
ATOM   4217 CB   SER   105      -2.646  37.277  29.067  1.00  1.00      7S   
ATOM   4218 HB1  SER   105      -1.615  37.331  28.684  1.00  0.00      7S   
ATOM   4219 HB2  SER   105      -2.863  36.219  29.325  1.00  0.00      7S   
ATOM   4220 OG   SER   105      -2.743  38.064  30.248  1.00  1.00      7S   
ATOM   4221 HG1  SER   105      -2.525  38.965  29.991  1.00  0.00      7S   
ATOM   4222 C    SER   105      -3.552  36.911  26.776  1.00  1.00      7S   
ATOM   4223 O    SER   105      -3.984  35.759  26.845  1.00  1.00      7S   
ATOM   4224 N    PRO   106      -3.057  37.385  25.629  1.00  1.00      7S   
ATOM   4225 CD   PRO   106      -2.702  38.788  25.382  1.00  1.00      7S   
ATOM   4226 HD1  PRO   106      -1.640  38.938  25.659  1.00  0.00      7S   
ATOM   4227 HD2  PRO   106      -3.340  39.507  25.941  1.00  0.00      7S   
ATOM   4228 CA   PRO   106      -3.077  36.609  24.398  1.00  1.00      7S   
ATOM   4229 HA   PRO   106      -4.066  36.202  24.245  1.00  0.00      7S   
ATOM   4230 CB   PRO   106      -2.640  37.595  23.303  1.00  1.00      7S   
ATOM   4231 HB1  PRO   106      -3.220  37.437  22.371  1.00  0.00      7S   
ATOM   4232 HB2  PRO   106      -1.552  37.513  23.083  1.00  0.00      7S   
ATOM   4233 CG   PRO   106      -2.904  38.985  23.885  1.00  1.00      7S   
ATOM   4234 HG1  PRO   106      -2.226  39.753  23.464  1.00  0.00      7S   
ATOM   4235 HG2  PRO   106      -3.957  39.281  23.703  1.00  0.00      7S   
ATOM   4236 C    PRO   106      -2.108  35.473  24.467  1.00  1.00      7S   
ATOM   4237 O    PRO   106      -1.141  35.568  25.204  1.00  1.00      7S   
ATOM   4238 N    ARG   107      -2.362  34.386  23.726  1.00  1.00      7S   
ATOM   4239 HN   ARG   107      -3.192  34.328  23.178  1.00  0.00      7S   
ATOM   4240 CA   ARG   107      -1.505  33.230  23.719  1.00  1.00      7S   
ATOM   4241 HA   ARG   107      -0.618  33.403  24.308  1.00  0.00      7S   
ATOM   4242 CB   ARG   107      -2.242  31.990  24.246  1.00  1.00      7S   
ATOM   4243 HB1  ARG   107      -1.604  31.094  24.122  1.00  0.00      7S   
ATOM   4244 HB2  ARG   107      -3.174  31.839  23.661  1.00  0.00      7S   
ATOM   4245 CG   ARG   107      -2.595  32.106  25.734  1.00  1.00      7S   
ATOM   4246 HG1  ARG   107      -3.267  32.972  25.890  1.00  0.00      7S   
ATOM   4247 HG2  ARG   107      -1.666  32.322  26.298  1.00  0.00      7S   
ATOM   4248 CD   ARG   107      -3.214  30.830  26.308  1.00  1.00      7S   
ATOM   4249 HD1  ARG   107      -3.378  30.940  27.402  1.00  0.00      7S   
ATOM   4250 HD2  ARG   107      -2.560  29.956  26.102  1.00  0.00      7S   
ATOM   4251 NE   ARG   107      -4.533  30.590  25.647  1.00  1.00      7S   
ATOM   4252 HE   ARG   107      -4.868  31.248  24.974  1.00  0.00      7S   
ATOM   4253 CZ   ARG   107      -5.335  29.550  26.002  1.00  1.00      7S   
ATOM   4254 NH1  ARG   107      -4.944  28.663  26.954  1.00  1.00      7S   
ATOM   4255 HH11 ARG   107      -4.053  28.774  27.389  1.00  0.00      7S   
ATOM   4256 HH12 ARG   107      -5.525  27.883  27.175  1.00  0.00      7S   
ATOM   4257 NH2  ARG   107      -6.538  29.398  25.393  1.00  1.00      7S   
ATOM   4258 HH21 ARG   107      -6.774  29.980  24.618  1.00  0.00      7S   
ATOM   4259 HH22 ARG   107      -7.163  28.685  25.705  1.00  0.00      7S   
ATOM   4260 C    ARG   107      -1.073  32.986  22.308  1.00  1.00      7S   
ATOM   4261 O    ARG   107      -1.876  33.071  21.385  1.00  1.00      7S   
ATOM   4262 N    TRP   108       0.228  32.689  22.110  1.00  1.00      7S   
ATOM   4263 HN   TRP   108       0.869  32.646  22.876  1.00  0.00      7S   
ATOM   4264 CA   TRP   108       0.818  32.523  20.806  1.00  1.00      7S   
ATOM   4265 HA   TRP   108       0.106  32.796  20.044  1.00  0.00      7S   
ATOM   4266 CB   TRP   108       2.085  33.380  20.620  1.00  1.00      7S   
ATOM   4267 HB1  TRP   108       2.566  33.149  19.647  1.00  0.00      7S   
ATOM   4268 HB2  TRP   108       2.804  33.144  21.436  1.00  0.00      7S   
ATOM   4269 CG   TRP   108       1.795  34.862  20.676  1.00  1.00      7S   
ATOM   4270 CD1  TRP   108       1.584  35.627  21.785  1.00  1.00      7S   
ATOM   4271 HD1  TRP   108       1.593  35.253  22.796  1.00  0.00      7S   
ATOM   4272 NE1  TRP   108       1.359  36.932  21.435  1.00  1.00      7S   
ATOM   4273 HE1  TRP   108       1.197  37.677  22.048  1.00  0.00      7S   
ATOM   4274 CE2  TRP   108       1.399  37.029  20.066  1.00  1.00      7S   
ATOM   4275 CD2  TRP   108       1.663  35.744  19.547  1.00  1.00      7S   
ATOM   4276 CE3  TRP   108       1.751  35.527  18.173  1.00  1.00      7S   
ATOM   4277 HE3  TRP   108       1.924  34.551  17.751  1.00  0.00      7S   
ATOM   4278 CZ3  TRP   108       1.576  36.631  17.324  1.00  1.00      7S   
ATOM   4279 HZ3  TRP   108       1.608  36.490  16.254  1.00  0.00      7S   
ATOM   4280 CZ2  TRP   108       1.226  38.118  19.227  1.00  1.00      7S   
ATOM   4281 HZ2  TRP   108       1.003  39.098  19.619  1.00  0.00      7S   
ATOM   4282 CH2  TRP   108       1.317  37.910  17.845  1.00  1.00      7S   
ATOM   4283 HH2  TRP   108       1.148  38.740  17.176  1.00  0.00      7S   
ATOM   4284 C    TRP   108       1.191  31.083  20.629  1.00  1.00      7S   
ATOM   4285 O    TRP   108       2.003  30.543  21.374  1.00  1.00      7S   
ATOM   4286 N    TYR   109       0.592  30.426  19.618  1.00  1.00      7S   
ATOM   4287 HN   TYR   109      -0.062  30.890  19.021  1.00  0.00      7S   
ATOM   4288 CA   TYR   109       0.804  29.028  19.349  1.00  1.00      7S   
ATOM   4289 HA   TYR   109       1.275  28.560  20.198  1.00  0.00      7S   
ATOM   4290 CB   TYR   109      -0.506  28.291  19.007  1.00  1.00      7S   
ATOM   4291 HB1  TYR   109      -0.292  27.261  18.653  1.00  0.00      7S   
ATOM   4292 HB2  TYR   109      -1.059  28.841  18.217  1.00  0.00      7S   
ATOM   4293 CG   TYR   109      -1.400  28.184  20.207  1.00  1.00      7S   
ATOM   4294 CD1  TYR   109      -1.337  27.054  21.040  1.00  1.00      7S   
ATOM   4295 HD1  TYR   109      -0.621  26.273  20.835  1.00  0.00      7S   
ATOM   4296 CE1  TYR   109      -2.200  26.928  22.134  1.00  1.00      7S   
ATOM   4297 HE1  TYR   109      -2.132  26.060  22.773  1.00  0.00      7S   
ATOM   4298 CZ   TYR   109      -3.118  27.947  22.415  1.00  1.00      7S   
ATOM   4299 OH   TYR   109      -3.973  27.826  23.526  1.00  1.00      7S   
ATOM   4300 HH   TYR   109      -3.858  26.941  23.878  1.00  0.00      7S   
ATOM   4301 CD2  TYR   109      -2.333  29.195  20.495  1.00  1.00      7S   
ATOM   4302 HD2  TYR   109      -2.395  30.068  19.860  1.00  0.00      7S   
ATOM   4303 CE2  TYR   109      -3.185  29.081  21.599  1.00  1.00      7S   
ATOM   4304 HE2  TYR   109      -3.896  29.863  21.815  1.00  0.00      7S   
ATOM   4305 C    TYR   109       1.716  28.890  18.163  1.00  1.00      7S   
ATOM   4306 O    TYR   109       1.518  29.532  17.139  1.00  1.00      7S   
ATOM   4307 N    PHE   110       2.739  28.021  18.272  1.00  1.00      7S   
ATOM   4308 HN   PHE   110       2.885  27.507  19.119  1.00  0.00      7S   
ATOM   4309 CA   PHE   110       3.686  27.774  17.215  1.00  1.00      7S   
ATOM   4310 HA   PHE   110       3.768  28.657  16.597  1.00  0.00      7S   
ATOM   4311 CB   PHE   110       5.085  27.434  17.786  1.00  1.00      7S   
ATOM   4312 HB1  PHE   110       5.009  26.609  18.527  1.00  0.00      7S   
ATOM   4313 HB2  PHE   110       5.493  28.323  18.301  1.00  0.00      7S   
ATOM   4314 CG   PHE   110       6.071  27.045  16.720  1.00  1.00      7S   
ATOM   4315 CD1  PHE   110       6.739  28.012  15.961  1.00  1.00      7S   
ATOM   4316 HD1  PHE   110       6.555  29.058  16.153  1.00  0.00      7S   
ATOM   4317 CE1  PHE   110       7.634  27.624  14.957  1.00  1.00      7S   
ATOM   4318 HE1  PHE   110       8.152  28.372  14.382  1.00  0.00      7S   
ATOM   4319 CZ   PHE   110       7.859  26.266  14.699  1.00  1.00      7S   
ATOM   4320 HZ   PHE   110       8.554  25.964  13.931  1.00  0.00      7S   
ATOM   4321 CD2  PHE   110       6.279  25.690  16.429  1.00  1.00      7S   
ATOM   4322 HD2  PHE   110       5.725  24.946  16.966  1.00  0.00      7S   
ATOM   4323 CE2  PHE   110       7.176  25.296  15.437  1.00  1.00      7S   
ATOM   4324 HE2  PHE   110       7.337  24.249  15.250  1.00  0.00      7S   
ATOM   4325 C    PHE   110       3.209  26.634  16.357  1.00  1.00      7S   
ATOM   4326 O    PHE   110       2.879  25.557  16.839  1.00  1.00      7S   
ATOM   4327 N    TYR   111       3.229  26.836  15.032  1.00  1.00      7S   
ATOM   4328 HN   TYR   111       3.465  27.729  14.647  1.00  0.00      7S   
ATOM   4329 CA   TYR   111       2.950  25.788  14.090  1.00  1.00      7S   
ATOM   4330 HA   TYR   111       2.932  24.823  14.576  1.00  0.00      7S   
ATOM   4331 CB   TYR   111       1.631  26.033  13.338  1.00  1.00      7S   
ATOM   4332 HB1  TYR   111       1.454  25.250  12.570  1.00  0.00      7S   
ATOM   4333 HB2  TYR   111       1.677  27.025  12.852  1.00  0.00      7S   
ATOM   4334 CG   TYR   111       0.461  26.051  14.278  1.00  1.00      7S   
ATOM   4335 CD1  TYR   111      -0.242  24.866  14.533  1.00  1.00      7S   
ATOM   4336 HD1  TYR   111       0.069  23.942  14.067  1.00  0.00      7S   
ATOM   4337 CE1  TYR   111      -1.362  24.878  15.368  1.00  1.00      7S   
ATOM   4338 HE1  TYR   111      -1.908  23.967  15.530  1.00  0.00      7S   
ATOM   4339 CZ   TYR   111      -1.768  26.060  15.992  1.00  1.00      7S   
ATOM   4340 OH   TYR   111      -2.867  26.050  16.873  1.00  1.00      7S   
ATOM   4341 HH   TYR   111      -2.911  26.914  17.288  1.00  0.00      7S   
ATOM   4342 CD2  TYR   111       0.031  27.245  14.888  1.00  1.00      7S   
ATOM   4343 HD2  TYR   111       0.563  28.168  14.704  1.00  0.00      7S   
ATOM   4344 CE2  TYR   111      -1.076  27.249  15.743  1.00  1.00      7S   
ATOM   4345 HE2  TYR   111      -1.394  28.171  16.203  1.00  0.00      7S   
ATOM   4346 C    TYR   111       4.077  25.784  13.098  1.00  1.00      7S   
ATOM   4347 O    TYR   111       4.661  26.821  12.789  1.00  1.00      7S   
ATOM   4348 N    TYR   112       4.416  24.592  12.562  1.00  1.00      7S   
ATOM   4349 HN   TYR   112       3.949  23.750  12.828  1.00  0.00      7S   
ATOM   4350 CA   TYR   112       5.469  24.446  11.585  1.00  1.00      7S   
ATOM   4351 HA   TYR   112       6.302  25.072  11.875  1.00  0.00      7S   
ATOM   4352 CB   TYR   112       5.936  22.977  11.437  1.00  1.00      7S   
ATOM   4353 HB1  TYR   112       6.551  22.838  10.523  1.00  0.00      7S   
ATOM   4354 HB2  TYR   112       5.055  22.301  11.384  1.00  0.00      7S   
ATOM   4355 CG   TYR   112       6.782  22.567  12.609  1.00  1.00      7S   
ATOM   4356 CD1  TYR   112       8.170  22.783  12.590  1.00  1.00      7S   
ATOM   4357 HD1  TYR   112       8.627  23.261  11.737  1.00  0.00      7S   
ATOM   4358 CE1  TYR   112       8.968  22.371  13.664  1.00  1.00      7S   
ATOM   4359 HE1  TYR   112      10.035  22.536  13.641  1.00  0.00      7S   
ATOM   4360 CZ   TYR   112       8.383  21.732  14.760  1.00  1.00      7S   
ATOM   4361 OH   TYR   112       9.192  21.331  15.831  1.00  1.00      7S   
ATOM   4362 HH   TYR   112       9.946  21.925  15.858  1.00  0.00      7S   
ATOM   4363 CD2  TYR   112       6.216  21.934  13.726  1.00  1.00      7S   
ATOM   4364 HD2  TYR   112       5.165  21.744  13.766  1.00  0.00      7S   
ATOM   4365 CE2  TYR   112       7.004  21.514  14.798  1.00  1.00      7S   
ATOM   4366 HE2  TYR   112       6.538  21.035  15.649  1.00  0.00      7S   
ATOM   4367 C    TYR   112       4.988  24.929  10.243  1.00  1.00      7S   
ATOM   4368 O    TYR   112       3.791  25.063   9.995  1.00  1.00      7S   
ATOM   4369 N    LEU   113       5.941  25.223   9.335  1.00  1.00      7S   
ATOM   4370 HN   LEU   113       6.910  25.129   9.552  1.00  0.00      7S   
ATOM   4371 CA   LEU   113       5.653  25.762   8.030  1.00  1.00      7S   
ATOM   4372 HA   LEU   113       5.099  26.680   8.181  1.00  0.00      7S   
ATOM   4373 CB   LEU   113       6.962  26.047   7.267  1.00  1.00      7S   
ATOM   4374 HB1  LEU   113       7.520  25.092   7.141  1.00  0.00      7S   
ATOM   4375 HB2  LEU   113       7.583  26.720   7.900  1.00  0.00      7S   
ATOM   4376 CG   LEU   113       6.807  26.712   5.886  1.00  1.00      7S   
ATOM   4377 HG   LEU   113       6.276  26.009   5.203  1.00  0.00      7S   
ATOM   4378 CD1  LEU   113       5.998  28.014   5.968  1.00  1.00      7S   
ATOM   4379 HD11 LEU   113       6.514  28.723   6.650  1.00  0.00      7S   
ATOM   4380 HD12 LEU   113       4.976  27.823   6.355  1.00  0.00      7S   
ATOM   4381 HD13 LEU   113       5.909  28.480   4.965  1.00  0.00      7S   
ATOM   4382 CD2  LEU   113       8.192  26.987   5.288  1.00  1.00      7S   
ATOM   4383 HD21 LEU   113       8.766  26.043   5.185  1.00  0.00      7S   
ATOM   4384 HD22 LEU   113       8.754  27.679   5.950  1.00  0.00      7S   
ATOM   4385 HD23 LEU   113       8.086  27.458   4.290  1.00  0.00      7S   
ATOM   4386 C    LEU   113       4.810  24.808   7.225  1.00  1.00      7S   
ATOM   4387 O    LEU   113       5.098  23.615   7.145  1.00  1.00      7S   
ATOM   4388 N    GLY   114       3.703  25.324   6.650  1.00  1.00      7S   
ATOM   4389 HN   GLY   114       3.487  26.298   6.704  1.00  0.00      7S   
ATOM   4390 CA   GLY   114       2.804  24.517   5.867  1.00  1.00      7S   
ATOM   4391 HA1  GLY   114       3.387  23.852   5.248  1.00  0.00      7S   
ATOM   4392 HA2  GLY   114       2.217  25.203   5.285  1.00  0.00      7S   
ATOM   4393 C    GLY   114       1.861  23.683   6.689  1.00  1.00      7S   
ATOM   4394 O    GLY   114       1.192  22.815   6.136  1.00  1.00      7S   
ATOM   4395 N    THR   115       1.779  23.905   8.025  1.00  1.00      7S   
ATOM   4396 HN   THR   115       2.374  24.565   8.481  1.00  0.00      7S   
ATOM   4397 CA   THR   115       0.861  23.172   8.878  1.00  1.00      7S   
ATOM   4398 HA   THR   115       0.157  22.627   8.266  1.00  0.00      7S   
ATOM   4399 CB   THR   115       1.548  22.199   9.829  1.00  1.00      7S   
ATOM   4400 HB   THR   115       0.787  21.598  10.376  1.00  0.00      7S   
ATOM   4401 OG1  THR   115       2.350  22.862  10.795  1.00  1.00      7S   
ATOM   4402 HG1  THR   115       2.868  23.513  10.306  1.00  0.00      7S   
ATOM   4403 CG2  THR   115       2.444  21.239   9.035  1.00  1.00      7S   
ATOM   4404 HG21 THR   115       3.236  21.789   8.485  1.00  0.00      7S   
ATOM   4405 HG22 THR   115       1.836  20.660   8.309  1.00  0.00      7S   
ATOM   4406 HG23 THR   115       2.947  20.535   9.729  1.00  0.00      7S   
ATOM   4407 C    THR   115       0.058  24.159   9.670  1.00  1.00      7S   
ATOM   4408 O    THR   115       0.343  25.350   9.643  1.00  1.00      7S   
ATOM   4409 N    GLY   116      -0.963  23.661  10.406  1.00  1.00      7S   
ATOM   4410 HN   GLY   116      -1.178  22.688  10.380  1.00  0.00      7S   
ATOM   4411 CA   GLY   116      -1.758  24.453  11.316  1.00  1.00      7S   
ATOM   4412 HA1  GLY   116      -1.109  25.172  11.792  1.00  0.00      7S   
ATOM   4413 HA2  GLY   116      -2.218  23.769  12.012  1.00  0.00      7S   
ATOM   4414 C    GLY   116      -2.851  25.179  10.590  1.00  1.00      7S   
ATOM   4415 O    GLY   116      -3.176  24.831   9.454  1.00  1.00      7S   
ATOM   4416 N    PRO   117      -3.444  26.203  11.199  1.00  1.00      7S   
ATOM   4417 CD   PRO   117      -3.282  26.531  12.620  1.00  1.00      7S   
ATOM   4418 HD1  PRO   117      -2.427  27.234  12.729  1.00  0.00      7S   
ATOM   4419 HD2  PRO   117      -3.121  25.634  13.256  1.00  0.00      7S   
ATOM   4420 CA   PRO   117      -4.521  26.961  10.581  1.00  1.00      7S   
ATOM   4421 HA   PRO   117      -5.277  26.271  10.234  1.00  0.00      7S   
ATOM   4422 CB   PRO   117      -5.029  27.894  11.695  1.00  1.00      7S   
ATOM   4423 HB1  PRO   117      -6.131  28.009  11.658  1.00  0.00      7S   
ATOM   4424 HB2  PRO   117      -4.550  28.896  11.634  1.00  0.00      7S   
ATOM   4425 CG   PRO   117      -4.588  27.224  13.002  1.00  1.00      7S   
ATOM   4426 HG1  PRO   117      -4.455  27.954  13.825  1.00  0.00      7S   
ATOM   4427 HG2  PRO   117      -5.335  26.456  13.300  1.00  0.00      7S   
ATOM   4428 C    PRO   117      -4.038  27.745   9.386  1.00  1.00      7S   
ATOM   4429 O    PRO   117      -4.773  27.842   8.407  1.00  1.00      7S   
ATOM   4430 N    GLU   118      -2.808  28.296   9.441  1.00  1.00      7S   
ATOM   4431 HN   GLU   118      -2.239  28.225  10.260  1.00  0.00      7S   
ATOM   4432 CA   GLU   118      -2.256  29.069   8.356  1.00  1.00      7S   
ATOM   4433 HA   GLU   118      -3.040  29.346   7.667  1.00  0.00      7S   
ATOM   4434 CB   GLU   118      -1.580  30.353   8.869  1.00  1.00      7S   
ATOM   4435 HB1  GLU   118      -1.176  30.931   8.011  1.00  0.00      7S   
ATOM   4436 HB2  GLU   118      -0.725  30.079   9.524  1.00  0.00      7S   
ATOM   4437 CG   GLU   118      -2.530  31.245   9.689  1.00  1.00      7S   
ATOM   4438 HG1  GLU   118      -1.953  32.097  10.100  1.00  0.00      7S   
ATOM   4439 HG2  GLU   118      -2.954  30.669  10.539  1.00  0.00      7S   
ATOM   4440 CD   GLU   118      -3.674  31.804   8.847  1.00  1.00      7S   
ATOM   4441 OE1  GLU   118      -3.504  31.977   7.611  1.00  1.00      7S   
ATOM   4442 OE2  GLU   118      -4.738  32.112   9.449  1.00  1.00      7S   
ATOM   4443 C    GLU   118      -1.256  28.245   7.595  1.00  1.00      7S   
ATOM   4444 O    GLU   118      -0.116  28.652   7.374  1.00  1.00      7S   
ATOM   4445 N    ALA   119      -1.688  27.054   7.133  1.00  1.00      7S   
ATOM   4446 HN   ALA   119      -2.610  26.725   7.330  1.00  0.00      7S   
ATOM   4447 CA   ALA   119      -0.845  26.153   6.390  1.00  1.00      7S   
ATOM   4448 HA   ALA   119       0.112  26.100   6.890  1.00  0.00      7S   
ATOM   4449 CB   ALA   119      -1.470  24.749   6.341  1.00  1.00      7S   
ATOM   4450 HB1  ALA   119      -2.474  24.772   5.872  1.00  0.00      7S   
ATOM   4451 HB2  ALA   119      -1.574  24.349   7.372  1.00  0.00      7S   
ATOM   4452 HB3  ALA   119      -0.829  24.052   5.763  1.00  0.00      7S   
ATOM   4453 C    ALA   119      -0.602  26.625   4.975  1.00  1.00      7S   
ATOM   4454 O    ALA   119       0.370  26.222   4.342  1.00  1.00      7S   
ATOM   4455 N    GLY   120      -1.470  27.508   4.435  1.00  1.00      7S   
ATOM   4456 HN   GLY   120      -2.239  27.864   4.960  1.00  0.00      7S   
ATOM   4457 CA   GLY   120      -1.361  27.939   3.059  1.00  1.00      7S   
ATOM   4458 HA1  GLY   120      -2.352  28.212   2.733  1.00  0.00      7S   
ATOM   4459 HA2  GLY   120      -0.933  27.138   2.472  1.00  0.00      7S   
ATOM   4460 C    GLY   120      -0.480  29.137   2.894  1.00  1.00      7S   
ATOM   4461 O    GLY   120      -0.026  29.416   1.786  1.00  1.00      7S   
ATOM   4462 N    LEU   121      -0.211  29.885   3.986  1.00  1.00      7S   
ATOM   4463 HN   LEU   121      -0.569  29.655   4.887  1.00  0.00      7S   
ATOM   4464 CA   LEU   121       0.595  31.075   3.916  1.00  1.00      7S   
ATOM   4465 HA   LEU   121       0.225  31.661   3.097  1.00  0.00      7S   
ATOM   4466 CB   LEU   121       0.505  31.901   5.213  1.00  1.00      7S   
ATOM   4467 HB1  LEU   121       1.382  32.583   5.288  1.00  0.00      7S   
ATOM   4468 HB2  LEU   121       0.534  31.207   6.082  1.00  0.00      7S   
ATOM   4469 CG   LEU   121      -0.750  32.787   5.327  1.00  1.00      7S   
ATOM   4470 HG   LEU   121      -1.656  32.138   5.372  1.00  0.00      7S   
ATOM   4471 CD1  LEU   121      -0.667  33.597   6.628  1.00  1.00      7S   
ATOM   4472 HD11 LEU   121       0.235  34.244   6.615  1.00  0.00      7S   
ATOM   4473 HD12 LEU   121      -0.602  32.918   7.503  1.00  0.00      7S   
ATOM   4474 HD13 LEU   121      -1.566  34.234   6.735  1.00  0.00      7S   
ATOM   4475 CD2  LEU   121      -0.898  33.727   4.118  1.00  1.00      7S   
ATOM   4476 HD21 LEU   121      -1.168  33.152   3.208  1.00  0.00      7S   
ATOM   4477 HD22 LEU   121       0.063  34.249   3.935  1.00  0.00      7S   
ATOM   4478 HD23 LEU   121      -1.691  34.480   4.302  1.00  0.00      7S   
ATOM   4479 C    LEU   121       2.049  30.730   3.685  1.00  1.00      7S   
ATOM   4480 O    LEU   121       2.592  29.913   4.429  1.00  1.00      7S   
ATOM   4481 N    PRO   122       2.733  31.316   2.696  1.00  1.00      7S   
ATOM   4482 CD   PRO   122       2.148  32.039   1.561  1.00  1.00      7S   
ATOM   4483 HD1  PRO   122       2.066  33.116   1.822  1.00  0.00      7S   
ATOM   4484 HD2  PRO   122       1.152  31.639   1.273  1.00  0.00      7S   
ATOM   4485 CA   PRO   122       4.158  31.106   2.521  1.00  1.00      7S   
ATOM   4486 HA   PRO   122       4.376  30.050   2.583  1.00  0.00      7S   
ATOM   4487 CB   PRO   122       4.486  31.717   1.145  1.00  1.00      7S   
ATOM   4488 HB1  PRO   122       5.184  31.070   0.577  1.00  0.00      7S   
ATOM   4489 HB2  PRO   122       4.924  32.735   1.239  1.00  0.00      7S   
ATOM   4490 CG   PRO   122       3.140  31.830   0.423  1.00  1.00      7S   
ATOM   4491 HG1  PRO   122       3.126  32.663  -0.307  1.00  0.00      7S   
ATOM   4492 HG2  PRO   122       2.910  30.871  -0.092  1.00  0.00      7S   
ATOM   4493 C    PRO   122       4.915  31.823   3.602  1.00  1.00      7S   
ATOM   4494 O    PRO   122       4.342  32.657   4.302  1.00  1.00      7S   
ATOM   4495 N    TYR   123       6.219  31.521   3.736  1.00  1.00      7S   
ATOM   4496 HN   TYR   123       6.650  30.832   3.159  1.00  0.00      7S   
ATOM   4497 CA   TYR   123       7.063  32.144   4.722  1.00  1.00      7S   
ATOM   4498 HA   TYR   123       6.585  32.016   5.684  1.00  0.00      7S   
ATOM   4499 CB   TYR   123       8.460  31.479   4.736  1.00  1.00      7S   
ATOM   4500 HB1  TYR   123       8.962  31.639   3.758  1.00  0.00      7S   
ATOM   4501 HB2  TYR   123       8.347  30.386   4.902  1.00  0.00      7S   
ATOM   4502 CG   TYR   123       9.345  32.016   5.825  1.00  1.00      7S   
ATOM   4503 CD1  TYR   123       9.183  31.585   7.149  1.00  1.00      7S   
ATOM   4504 HD1  TYR   123       8.427  30.853   7.386  1.00  0.00      7S   
ATOM   4505 CE1  TYR   123      10.009  32.085   8.160  1.00  1.00      7S   
ATOM   4506 HE1  TYR   123       9.870  31.749   9.177  1.00  0.00      7S   
ATOM   4507 CZ   TYR   123      10.985  33.042   7.858  1.00  1.00      7S   
ATOM   4508 OH   TYR   123      11.787  33.571   8.887  1.00  1.00      7S   
ATOM   4509 HH   TYR   123      11.443  33.236   9.718  1.00  0.00      7S   
ATOM   4510 CD2  TYR   123      10.330  32.973   5.528  1.00  1.00      7S   
ATOM   4511 HD2  TYR   123      10.449  33.324   4.514  1.00  0.00      7S   
ATOM   4512 CE2  TYR   123      11.150  33.484   6.540  1.00  1.00      7S   
ATOM   4513 HE2  TYR   123      11.902  34.221   6.302  1.00  0.00      7S   
ATOM   4514 C    TYR   123       7.190  33.624   4.434  1.00  1.00      7S   
ATOM   4515 O    TYR   123       7.274  34.047   3.282  1.00  1.00      7S   
ATOM   4516 N    GLY   124       7.176  34.439   5.511  1.00  1.00      7S   
ATOM   4517 HN   GLY   124       7.124  34.066   6.435  1.00  0.00      7S   
ATOM   4518 CA   GLY   124       7.325  35.870   5.412  1.00  1.00      7S   
ATOM   4519 HA1  GLY   124       8.010  36.090   4.605  1.00  0.00      7S   
ATOM   4520 HA2  GLY   124       7.686  36.210   6.371  1.00  0.00      7S   
ATOM   4521 C    GLY   124       6.038  36.590   5.130  1.00  1.00      7S   
ATOM   4522 O    GLY   124       6.040  37.816   5.039  1.00  1.00      7S   
ATOM   4523 N    ALA   125       4.902  35.867   4.979  1.00  1.00      7S   
ATOM   4524 HN   ALA   125       4.895  34.874   5.082  1.00  0.00      7S   
ATOM   4525 CA   ALA   125       3.639  36.460   4.606  1.00  1.00      7S   
ATOM   4526 HA   ALA   125       3.798  37.059   3.720  1.00  0.00      7S   
ATOM   4527 CB   ALA   125       2.585  35.386   4.299  1.00  1.00      7S   
ATOM   4528 HB1  ALA   125       2.422  34.736   5.185  1.00  0.00      7S   
ATOM   4529 HB2  ALA   125       2.935  34.743   3.463  1.00  0.00      7S   
ATOM   4530 HB3  ALA   125       1.617  35.845   4.007  1.00  0.00      7S   
ATOM   4531 C    ALA   125       3.112  37.345   5.706  1.00  1.00      7S   
ATOM   4532 O    ALA   125       2.912  36.909   6.838  1.00  1.00      7S   
ATOM   4533 N    ASN   126       2.890  38.640   5.393  1.00  1.00      7S   
ATOM   4534 HN   ASN   126       3.061  38.995   4.477  1.00  0.00      7S   
ATOM   4535 CA   ASN   126       2.451  39.604   6.371  1.00  1.00      7S   
ATOM   4536 HA   ASN   126       3.021  39.448   7.278  1.00  0.00      7S   
ATOM   4537 CB   ASN   126       2.676  41.053   5.872  1.00  1.00      7S   
ATOM   4538 HB1  ASN   126       2.126  41.198   4.917  1.00  0.00      7S   
ATOM   4539 HB2  ASN   126       3.760  41.201   5.677  1.00  0.00      7S   
ATOM   4540 CG   ASN   126       2.226  42.101   6.902  1.00  1.00      7S   
ATOM   4541 OD1  ASN   126       2.178  41.849   8.110  1.00  1.00      7S   
ATOM   4542 ND2  ASN   126       1.872  43.311   6.386  1.00  1.00      7S   
ATOM   4543 HD21 ASN   126       1.547  44.025   7.004  1.00  0.00      7S   
ATOM   4544 HD22 ASN   126       1.934  43.466   5.401  1.00  0.00      7S   
ATOM   4545 C    ASN   126       0.987  39.384   6.662  1.00  1.00      7S   
ATOM   4546 O    ASN   126       0.160  39.341   5.753  1.00  1.00      7S   
ATOM   4547 N    LYS   127       0.657  39.251   7.963  1.00  1.00      7S   
ATOM   4548 HN   LYS   127       1.343  39.271   8.689  1.00  0.00      7S   
ATOM   4549 CA   LYS   127      -0.705  39.108   8.378  1.00  1.00      7S   
ATOM   4550 HA   LYS   127      -1.307  39.856   7.881  1.00  0.00      7S   
ATOM   4551 CB   LYS   127      -1.225  37.688   8.093  1.00  1.00      7S   
ATOM   4552 HB1  LYS   127      -0.594  36.941   8.622  1.00  0.00      7S   
ATOM   4553 HB2  LYS   127      -1.121  37.498   7.000  1.00  0.00      7S   
ATOM   4554 CG   LYS   127      -2.688  37.471   8.464  1.00  1.00      7S   
ATOM   4555 HG1  LYS   127      -3.314  38.227   7.939  1.00  0.00      7S   
ATOM   4556 HG2  LYS   127      -2.824  37.606   9.559  1.00  0.00      7S   
ATOM   4557 CD   LYS   127      -3.150  36.068   8.081  1.00  1.00      7S   
ATOM   4558 HD1  LYS   127      -2.536  35.324   8.637  1.00  0.00      7S   
ATOM   4559 HD2  LYS   127      -2.966  35.927   6.992  1.00  0.00      7S   
ATOM   4560 CE   LYS   127      -4.628  35.867   8.394  1.00  1.00      7S   
ATOM   4561 HE1  LYS   127      -5.225  36.667   7.904  1.00  0.00      7S   
ATOM   4562 HE2  LYS   127      -4.794  35.897   9.491  1.00  0.00      7S   
ATOM   4563 NZ   LYS   127      -5.105  34.568   7.883  1.00  1.00      7S   
ATOM   4564 HZ1  LYS   127      -4.689  33.788   8.441  1.00  0.00      7S   
ATOM   4565 HZ2  LYS   127      -4.823  34.451   6.889  1.00  0.00      7S   
ATOM   4566 HZ3  LYS   127      -6.140  34.522   7.961  1.00  0.00      7S   
ATOM   4567 C    LYS   127      -0.745  39.363   9.849  1.00  1.00      7S   
ATOM   4568 O    LYS   127       0.170  38.976  10.568  1.00  1.00      7S   
ATOM   4569 N    ASP   128      -1.824  40.020  10.337  1.00  1.00      7S   
ATOM   4570 HN   ASP   128      -2.564  40.319   9.740  1.00  0.00      7S   
ATOM   4571 CA   ASP   128      -1.999  40.344  11.731  1.00  1.00      7S   
ATOM   4572 HA   ASP   128      -1.110  40.862  12.059  1.00  0.00      7S   
ATOM   4573 CB   ASP   128      -3.214  41.281  11.907  1.00  1.00      7S   
ATOM   4574 HB1  ASP   128      -4.132  40.752  11.570  1.00  0.00      7S   
ATOM   4575 HB2  ASP   128      -3.079  42.190  11.284  1.00  0.00      7S   
ATOM   4576 CG   ASP   128      -3.415  41.729  13.347  1.00  1.00      7S   
ATOM   4577 OD1  ASP   128      -2.562  42.471  13.899  1.00  1.00      7S   
ATOM   4578 OD2  ASP   128      -4.458  41.306  13.908  1.00  1.00      7S   
ATOM   4579 C    ASP   128      -2.164  39.076  12.548  1.00  1.00      7S   
ATOM   4580 O    ASP   128      -2.841  38.132  12.143  1.00  1.00      7S   
ATOM   4581 N    GLY   129      -1.488  39.033  13.718  1.00  1.00      7S   
ATOM   4582 HN   GLY   129      -0.965  39.823  14.033  1.00  0.00      7S   
ATOM   4583 CA   GLY   129      -1.483  37.886  14.590  1.00  1.00      7S   
ATOM   4584 HA1  GLY   129      -2.495  37.510  14.650  1.00  0.00      7S   
ATOM   4585 HA2  GLY   129      -1.102  38.215  15.544  1.00  0.00      7S   
ATOM   4586 C    GLY   129      -0.601  36.770  14.108  1.00  1.00      7S   
ATOM   4587 O    GLY   129      -0.733  35.657  14.604  1.00  1.00      7S   
ATOM   4588 N    ILE   130       0.305  37.020  13.132  1.00  1.00      7S   
ATOM   4589 HN   ILE   130       0.395  37.928  12.731  1.00  0.00      7S   
ATOM   4590 CA   ILE   130       1.166  36.002  12.568  1.00  1.00      7S   
ATOM   4591 HA   ILE   130       1.205  35.156  13.233  1.00  0.00      7S   
ATOM   4592 CB   ILE   130       0.720  35.543  11.176  1.00  1.00      7S   
ATOM   4593 HB   ILE   130       0.606  36.435  10.519  1.00  0.00      7S   
ATOM   4594 CG2  ILE   130       1.766  34.606  10.532  1.00  1.00      7S   
ATOM   4595 HG21 ILE   130       2.037  33.793  11.237  1.00  0.00      7S   
ATOM   4596 HG22 ILE   130       2.684  35.163  10.256  1.00  0.00      7S   
ATOM   4597 HG23 ILE   130       1.343  34.150   9.611  1.00  0.00      7S   
ATOM   4598 CG1  ILE   130      -0.655  34.838  11.231  1.00  1.00      7S   
ATOM   4599 HG11 ILE   130      -0.982  34.617  10.191  1.00  0.00      7S   
ATOM   4600 HG12 ILE   130      -1.405  35.524  11.681  1.00  0.00      7S   
ATOM   4601 CD   ILE   130      -0.634  33.526  12.018  1.00  1.00      7S   
ATOM   4602 HD1  ILE   130      -0.317  33.705  13.062  1.00  0.00      7S   
ATOM   4603 HD2  ILE   130       0.069  32.798  11.563  1.00  0.00      7S   
ATOM   4604 HD3  ILE   130      -1.645  33.072  12.038  1.00  0.00      7S   
ATOM   4605 C    ILE   130       2.552  36.581  12.505  1.00  1.00      7S   
ATOM   4606 O    ILE   130       2.770  37.621  11.887  1.00  1.00      7S   
ATOM   4607 N    ILE   131       3.530  35.905  13.154  1.00  1.00      7S   
ATOM   4608 HN   ILE   131       3.324  35.110  13.724  1.00  0.00      7S   
ATOM   4609 CA   ILE   131       4.931  36.242  13.024  1.00  1.00      7S   
ATOM   4610 HA   ILE   131       5.059  36.973  12.239  1.00  0.00      7S   
ATOM   4611 CB   ILE   131       5.553  36.770  14.307  1.00  1.00      7S   
ATOM   4612 HB   ILE   131       6.636  36.973  14.135  1.00  0.00      7S   
ATOM   4613 CG2  ILE   131       4.872  38.095  14.701  1.00  1.00      7S   
ATOM   4614 HG21 ILE   131       3.833  37.903  15.043  1.00  0.00      7S   
ATOM   4615 HG22 ILE   131       4.847  38.795  13.841  1.00  0.00      7S   
ATOM   4616 HG23 ILE   131       5.427  38.572  15.535  1.00  0.00      7S   
ATOM   4617 CG1  ILE   131       5.420  35.752  15.446  1.00  1.00      7S   
ATOM   4618 HG11 ILE   131       5.733  34.748  15.093  1.00  0.00      7S   
ATOM   4619 HG12 ILE   131       4.353  35.692  15.764  1.00  0.00      7S   
ATOM   4620 CD   ILE   131       6.280  36.094  16.651  1.00  1.00      7S   
ATOM   4621 HD1  ILE   131       5.761  36.863  17.251  1.00  0.00      7S   
ATOM   4622 HD2  ILE   131       7.269  36.483  16.328  1.00  0.00      7S   
ATOM   4623 HD3  ILE   131       6.428  35.199  17.288  1.00  0.00      7S   
ATOM   4624 C    ILE   131       5.661  35.001  12.578  1.00  1.00      7S   
ATOM   4625 O    ILE   131       5.161  33.892  12.735  1.00  1.00      7S   
ATOM   4626 N    TRP   132       6.869  35.170  11.997  1.00  1.00      7S   
ATOM   4627 HN   TRP   132       7.277  36.074  11.909  1.00  0.00      7S   
ATOM   4628 CA   TRP   132       7.610  34.088  11.389  1.00  1.00      7S   
ATOM   4629 HA   TRP   132       7.082  33.152  11.508  1.00  0.00      7S   
ATOM   4630 CB   TRP   132       7.848  34.336   9.888  1.00  1.00      7S   
ATOM   4631 HB1  TRP   132       8.485  33.537   9.471  1.00  0.00      7S   
ATOM   4632 HB2  TRP   132       8.366  35.311   9.749  1.00  0.00      7S   
ATOM   4633 CG   TRP   132       6.567  34.368   9.096  1.00  1.00      7S   
ATOM   4634 CD1  TRP   132       5.829  35.467   8.773  1.00  1.00      7S   
ATOM   4635 HD1  TRP   132       6.096  36.483   9.026  1.00  0.00      7S   
ATOM   4636 NE1  TRP   132       4.704  35.096   8.087  1.00  1.00      7S   
ATOM   4637 HE1  TRP   132       4.032  35.705   7.719  1.00  0.00      7S   
ATOM   4638 CE2  TRP   132       4.697  33.732   7.945  1.00  1.00      7S   
ATOM   4639 CD2  TRP   132       5.856  33.229   8.572  1.00  1.00      7S   
ATOM   4640 CE3  TRP   132       6.119  31.862   8.600  1.00  1.00      7S   
ATOM   4641 HE3  TRP   132       6.982  31.448   9.095  1.00  0.00      7S   
ATOM   4642 CZ3  TRP   132       5.194  31.005   7.980  1.00  1.00      7S   
ATOM   4643 HZ3  TRP   132       5.355  29.939   8.008  1.00  0.00      7S   
ATOM   4644 CZ2  TRP   132       3.786  32.884   7.333  1.00  1.00      7S   
ATOM   4645 HZ2  TRP   132       2.903  33.262   6.844  1.00  0.00      7S   
ATOM   4646 CH2  TRP   132       4.045  31.509   7.355  1.00  1.00      7S   
ATOM   4647 HH2  TRP   132       3.348  30.833   6.881  1.00  0.00      7S   
ATOM   4648 C    TRP   132       8.948  33.954  12.054  1.00  1.00      7S   
ATOM   4649 O    TRP   132       9.630  34.944  12.315  1.00  1.00      7S   
ATOM   4650 N    VAL   133       9.349  32.696  12.341  1.00  1.00      7S   
ATOM   4651 HN   VAL   133       8.760  31.909  12.150  1.00  0.00      7S   
ATOM   4652 CA   VAL   133      10.625  32.380  12.939  1.00  1.00      7S   
ATOM   4653 HA   VAL   133      11.277  33.239  12.865  1.00  0.00      7S   
ATOM   4654 CB   VAL   133      10.520  31.946  14.393  1.00  1.00      7S   
ATOM   4655 HB   VAL   133      11.519  31.624  14.768  1.00  0.00      7S   
ATOM   4656 CG1  VAL   133      10.055  33.146  15.237  1.00  1.00      7S   
ATOM   4657 HG11 VAL   133       9.061  33.508  14.902  1.00  0.00      7S   
ATOM   4658 HG12 VAL   133      10.788  33.977  15.165  1.00  0.00      7S   
ATOM   4659 HG13 VAL   133       9.957  32.844  16.299  1.00  0.00      7S   
ATOM   4660 CG2  VAL   133       9.541  30.769  14.541  1.00  1.00      7S   
ATOM   4661 HG21 VAL   133       9.890  29.891  13.961  1.00  0.00      7S   
ATOM   4662 HG22 VAL   133       8.527  31.053  14.191  1.00  0.00      7S   
ATOM   4663 HG23 VAL   133       9.474  30.469  15.606  1.00  0.00      7S   
ATOM   4664 C    VAL   133      11.253  31.285  12.126  1.00  1.00      7S   
ATOM   4665 O    VAL   133      10.566  30.477  11.504  1.00  1.00      7S   
ATOM   4666 N    ALA   134      12.601  31.249  12.093  1.00  1.00      7S   
ATOM   4667 HN   ALA   134      13.165  31.888  12.610  1.00  0.00      7S   
ATOM   4668 CA   ALA   134      13.294  30.294  11.274  1.00  1.00      7S   
ATOM   4669 HA   ALA   134      12.878  29.315  11.453  1.00  0.00      7S   
ATOM   4670 CB   ALA   134      13.221  30.642   9.775  1.00  1.00      7S   
ATOM   4671 HB1  ALA   134      13.785  31.569   9.544  1.00  0.00      7S   
ATOM   4672 HB2  ALA   134      12.165  30.824   9.495  1.00  0.00      7S   
ATOM   4673 HB3  ALA   134      13.607  29.808   9.151  1.00  0.00      7S   
ATOM   4674 C    ALA   134      14.733  30.276  11.674  1.00  1.00      7S   
ATOM   4675 O    ALA   134      15.403  31.304  11.653  1.00  1.00      7S   
ATOM   4676 N    THR   135      15.249  29.082  12.031  1.00  1.00      7S   
ATOM   4677 HN   THR   135      14.672  28.268  12.107  1.00  0.00      7S   
ATOM   4678 CA   THR   135      16.643  28.859  12.322  1.00  1.00      7S   
ATOM   4679 HA   THR   135      17.014  29.700  12.888  1.00  0.00      7S   
ATOM   4680 CB   THR   135      16.869  27.577  13.107  1.00  1.00      7S   
ATOM   4681 HB   THR   135      16.757  26.690  12.444  1.00  0.00      7S   
ATOM   4682 OG1  THR   135      15.917  27.486  14.159  1.00  1.00      7S   
ATOM   4683 HG1  THR   135      16.065  26.636  14.582  1.00  0.00      7S   
ATOM   4684 CG2  THR   135      18.268  27.563  13.742  1.00  1.00      7S   
ATOM   4685 HG21 THR   135      18.381  28.429  14.428  1.00  0.00      7S   
ATOM   4686 HG22 THR   135      19.055  27.612  12.963  1.00  0.00      7S   
ATOM   4687 HG23 THR   135      18.414  26.625  14.320  1.00  0.00      7S   
ATOM   4688 C    THR   135      17.379  28.775  11.012  1.00  1.00      7S   
ATOM   4689 O    THR   135      16.844  28.282  10.018  1.00  1.00      7S   
ATOM   4690 N    GLU   136      18.640  29.263  10.975  1.00  1.00      7S   
ATOM   4691 HN   GLU   136      19.060  29.686  11.775  1.00  0.00      7S   
ATOM   4692 CA   GLU   136      19.462  29.207   9.791  1.00  1.00      7S   
ATOM   4693 HA   GLU   136      18.907  29.686   8.996  1.00  0.00      7S   
ATOM   4694 CB   GLU   136      20.809  29.945   9.984  1.00  1.00      7S   
ATOM   4695 HB1  GLU   136      21.482  29.333  10.625  1.00  0.00      7S   
ATOM   4696 HB2  GLU   136      20.604  30.896  10.525  1.00  0.00      7S   
ATOM   4697 CG   GLU   136      21.509  30.279   8.652  1.00  1.00      7S   
ATOM   4698 HG1  GLU   136      20.805  30.848   8.007  1.00  0.00      7S   
ATOM   4699 HG2  GLU   136      21.792  29.341   8.131  1.00  0.00      7S   
ATOM   4700 CD   GLU   136      22.767  31.118   8.872  1.00  1.00      7S   
ATOM   4701 OE1  GLU   136      23.780  30.552   9.360  1.00  1.00      7S   
ATOM   4702 OE2  GLU   136      22.732  32.332   8.537  1.00  1.00      7S   
ATOM   4703 C    GLU   136      19.723  27.766   9.407  1.00  1.00      7S   
ATOM   4704 O    GLU   136      19.921  26.909  10.268  1.00  1.00      7S   
ATOM   4705 N    GLY   137      19.665  27.470   8.090  1.00  1.00      7S   
ATOM   4706 HN   GLY   137      19.512  28.184   7.411  1.00  0.00      7S   
ATOM   4707 CA   GLY   137      19.876  26.133   7.581  1.00  1.00      7S   
ATOM   4708 HA1  GLY   137      20.449  25.562   8.297  1.00  0.00      7S   
ATOM   4709 HA2  GLY   137      20.383  26.243   6.635  1.00  0.00      7S   
ATOM   4710 C    GLY   137      18.591  25.397   7.324  1.00  1.00      7S   
ATOM   4711 O    GLY   137      18.606  24.340   6.696  1.00  1.00      7S   
ATOM   4712 N    ALA   138      17.439  25.928   7.796  1.00  1.00      7S   
ATOM   4713 HN   ALA   138      17.429  26.773   8.327  1.00  0.00      7S   
ATOM   4714 CA   ALA   138      16.154  25.303   7.606  1.00  1.00      7S   
ATOM   4715 HA   ALA   138      16.267  24.246   7.778  1.00  0.00      7S   
ATOM   4716 CB   ALA   138      15.107  25.849   8.586  1.00  1.00      7S   
ATOM   4717 HB1  ALA   138      14.985  26.945   8.448  1.00  0.00      7S   
ATOM   4718 HB2  ALA   138      15.444  25.667   9.630  1.00  0.00      7S   
ATOM   4719 HB3  ALA   138      14.126  25.352   8.444  1.00  0.00      7S   
ATOM   4720 C    ALA   138      15.658  25.506   6.199  1.00  1.00      7S   
ATOM   4721 O    ALA   138      16.064  26.441   5.509  1.00  1.00      7S   
ATOM   4722 N    LEU   139      14.776  24.595   5.732  1.00  1.00      7S   
ATOM   4723 HN   LEU   139      14.442  23.848   6.304  1.00  0.00      7S   
ATOM   4724 CA   LEU   139      14.315  24.593   4.365  1.00  1.00      7S   
ATOM   4725 HA   LEU   139      14.965  25.210   3.760  1.00  0.00      7S   
ATOM   4726 CB   LEU   139      14.273  23.172   3.761  1.00  1.00      7S   
ATOM   4727 HB1  LEU   139      13.895  23.236   2.717  1.00  0.00      7S   
ATOM   4728 HB2  LEU   139      13.566  22.546   4.350  1.00  0.00      7S   
ATOM   4729 CG   LEU   139      15.636  22.441   3.719  1.00  1.00      7S   
ATOM   4730 HG   LEU   139      15.933  22.193   4.761  1.00  0.00      7S   
ATOM   4731 CD1  LEU   139      15.502  21.128   2.926  1.00  1.00      7S   
ATOM   4732 HD11 LEU   139      15.198  21.351   1.881  1.00  0.00      7S   
ATOM   4733 HD12 LEU   139      14.737  20.469   3.387  1.00  0.00      7S   
ATOM   4734 HD13 LEU   139      16.472  20.587   2.905  1.00  0.00      7S   
ATOM   4735 CD2  LEU   139      16.775  23.302   3.152  1.00  1.00      7S   
ATOM   4736 HD21 LEU   139      16.936  24.199   3.785  1.00  0.00      7S   
ATOM   4737 HD22 LEU   139      16.530  23.620   2.118  1.00  0.00      7S   
ATOM   4738 HD23 LEU   139      17.720  22.718   3.143  1.00  0.00      7S   
ATOM   4739 C    LEU   139      12.936  25.185   4.294  1.00  1.00      7S   
ATOM   4740 O    LEU   139      12.109  24.985   5.182  1.00  1.00      7S   
ATOM   4741 N    ASN   140      12.665  25.940   3.203  1.00  1.00      7S   
ATOM   4742 HN   ASN   140      13.356  26.082   2.497  1.00  0.00      7S   
ATOM   4743 CA   ASN   140      11.415  26.634   2.990  1.00  1.00      7S   
ATOM   4744 HA   ASN   140      10.970  26.850   3.951  1.00  0.00      7S   
ATOM   4745 CB   ASN   140      11.661  27.961   2.228  1.00  1.00      7S   
ATOM   4746 HB1  ASN   140      11.981  27.753   1.185  1.00  0.00      7S   
ATOM   4747 HB2  ASN   140      12.492  28.498   2.739  1.00  0.00      7S   
ATOM   4748 CG   ASN   140      10.425  28.873   2.215  1.00  1.00      7S   
ATOM   4749 OD1  ASN   140       9.278  28.445   2.372  1.00  1.00      7S   
ATOM   4750 ND2  ASN   140      10.683  30.195   2.014  1.00  1.00      7S   
ATOM   4751 HD21 ASN   140       9.918  30.836   1.982  1.00  0.00      7S   
ATOM   4752 HD22 ASN   140      11.625  30.506   1.901  1.00  0.00      7S   
ATOM   4753 C    ASN   140      10.483  25.729   2.218  1.00  1.00      7S   
ATOM   4754 O    ASN   140      10.183  25.958   1.047  1.00  1.00      7S   
ATOM   4755 N    THR   141      10.008  24.662   2.886  1.00  1.00      7S   
ATOM   4756 HN   THR   141      10.273  24.491   3.833  1.00  0.00      7S   
ATOM   4757 CA   THR   141       9.169  23.665   2.268  1.00  1.00      7S   
ATOM   4758 HA   THR   141       8.718  24.096   1.389  1.00  0.00      7S   
ATOM   4759 CB   THR   141       9.934  22.392   1.911  1.00  1.00      7S   
ATOM   4760 HB   THR   141       9.227  21.576   1.639  1.00  0.00      7S   
ATOM   4761 OG1  THR   141      10.757  21.959   2.993  1.00  1.00      7S   
ATOM   4762 HG1  THR   141      11.296  21.247   2.641  1.00  0.00      7S   
ATOM   4763 CG2  THR   141      10.828  22.668   0.687  1.00  1.00      7S   
ATOM   4764 HG21 THR   141      11.569  23.465   0.909  1.00  0.00      7S   
ATOM   4765 HG22 THR   141      10.208  22.991  -0.176  1.00  0.00      7S   
ATOM   4766 HG23 THR   141      11.378  21.748   0.400  1.00  0.00      7S   
ATOM   4767 C    THR   141       8.071  23.317   3.238  1.00  1.00      7S   
ATOM   4768 O    THR   141       8.287  23.434   4.443  1.00  1.00      7S   
ATOM   4769 N    PRO   142       6.897  22.863   2.787  1.00  1.00      7S   
ATOM   4770 CD   PRO   142       6.460  22.901   1.387  1.00  1.00      7S   
ATOM   4771 HD1  PRO   142       7.261  22.571   0.690  1.00  0.00      7S   
ATOM   4772 HD2  PRO   142       6.137  23.936   1.131  1.00  0.00      7S   
ATOM   4773 CA   PRO   142       5.854  22.356   3.668  1.00  1.00      7S   
ATOM   4774 HA   PRO   142       5.630  23.105   4.416  1.00  0.00      7S   
ATOM   4775 CB   PRO   142       4.669  22.047   2.739  1.00  1.00      7S   
ATOM   4776 HB1  PRO   142       3.951  22.895   2.765  1.00  0.00      7S   
ATOM   4777 HB2  PRO   142       4.135  21.113   3.011  1.00  0.00      7S   
ATOM   4778 CG   PRO   142       5.274  21.945   1.334  1.00  1.00      7S   
ATOM   4779 HG1  PRO   142       5.649  20.911   1.168  1.00  0.00      7S   
ATOM   4780 HG2  PRO   142       4.545  22.215   0.545  1.00  0.00      7S   
ATOM   4781 C    PRO   142       6.302  21.100   4.380  1.00  1.00      7S   
ATOM   4782 O    PRO   142       7.071  20.318   3.821  1.00  1.00      7S   
ATOM   4783 N    LYS   143       5.851  20.934   5.644  1.00  1.00      7S   
ATOM   4784 HN   LYS   143       5.201  21.577   6.043  1.00  0.00      7S   
ATOM   4785 CA   LYS   143       6.388  19.940   6.541  1.00  1.00      7S   
ATOM   4786 HA   LYS   143       7.018  19.252   5.994  1.00  0.00      7S   
ATOM   4787 CB   LYS   143       7.216  20.573   7.671  1.00  1.00      7S   
ATOM   4788 HB1  LYS   143       7.652  19.783   8.322  1.00  0.00      7S   
ATOM   4789 HB2  LYS   143       6.587  21.250   8.290  1.00  0.00      7S   
ATOM   4790 CG   LYS   143       8.350  21.388   7.070  1.00  1.00      7S   
ATOM   4791 HG1  LYS   143       7.924  22.214   6.461  1.00  0.00      7S   
ATOM   4792 HG2  LYS   143       8.938  20.726   6.395  1.00  0.00      7S   
ATOM   4793 CD   LYS   143       9.268  22.028   8.093  1.00  1.00      7S   
ATOM   4794 HD1  LYS   143       9.751  21.232   8.703  1.00  0.00      7S   
ATOM   4795 HD2  LYS   143       8.676  22.674   8.779  1.00  0.00      7S   
ATOM   4796 CE   LYS   143      10.307  22.877   7.365  1.00  1.00      7S   
ATOM   4797 HE1  LYS   143      11.017  23.305   8.099  1.00  0.00      7S   
ATOM   4798 HE2  LYS   143       9.828  23.700   6.800  1.00  0.00      7S   
ATOM   4799 NZ   LYS   143      11.079  22.052   6.405  1.00  1.00      7S   
ATOM   4800 HZ1  LYS   143      10.732  22.194   5.436  1.00  0.00      7S   
ATOM   4801 HZ2  LYS   143      11.010  21.047   6.668  1.00  0.00      7S   
ATOM   4802 HZ3  LYS   143      12.084  22.330   6.466  1.00  0.00      7S   
ATOM   4803 C    LYS   143       5.263  19.158   7.125  1.00  1.00      7S   
ATOM   4804 O    LYS   143       4.983  19.210   8.322  1.00  1.00      7S   
ATOM   4805 N    ASP   144       4.601  18.368   6.260  1.00  1.00      7S   
ATOM   4806 HN   ASP   144       4.824  18.368   5.287  1.00  0.00      7S   
ATOM   4807 CA   ASP   144       3.480  17.548   6.639  1.00  1.00      7S   
ATOM   4808 HA   ASP   144       2.845  18.119   7.302  1.00  0.00      7S   
ATOM   4809 CB   ASP   144       2.680  17.103   5.400  1.00  1.00      7S   
ATOM   4810 HB1  ASP   144       1.877  16.393   5.687  1.00  0.00      7S   
ATOM   4811 HB2  ASP   144       3.367  16.606   4.686  1.00  0.00      7S   
ATOM   4812 CG   ASP   144       2.040  18.318   4.731  1.00  1.00      7S   
ATOM   4813 OD1  ASP   144       1.226  19.001   5.407  1.00  1.00      7S   
ATOM   4814 OD2  ASP   144       2.353  18.578   3.540  1.00  1.00      7S   
ATOM   4815 C    ASP   144       3.900  16.313   7.397  1.00  1.00      7S   
ATOM   4816 O    ASP   144       3.072  15.682   8.051  1.00  1.00      7S   
ATOM   4817 N    HSE   145       5.202  15.944   7.377  1.00  1.00      7S   
ATOM   4818 HN   HSE   145       5.888  16.425   6.832  1.00  0.00      7S   
ATOM   4819 CA   HSE   145       5.694  14.828   8.152  1.00  1.00      7S   
ATOM   4820 HA   HSE   145       5.013  14.003   7.998  1.00  0.00      7S   
ATOM   4821 CB   HSE   145       7.104  14.378   7.710  1.00  1.00      7S   
ATOM   4822 HB1  HSE   145       7.030  13.965   6.680  1.00  0.00      7S   
ATOM   4823 HB2  HSE   145       7.446  13.553   8.373  1.00  0.00      7S   
ATOM   4824 ND1  HSE   145       8.206  16.379   6.677  1.00  1.00      7S   
ATOM   4825 CG   HSE   145       8.155  15.457   7.709  1.00  1.00      7S   
ATOM   4826 CE1  HSE   145       9.228  17.154   6.967  1.00  1.00      7S   
ATOM   4827 HE1  HSE   145       9.582  17.997   6.374  1.00  0.00      7S   
ATOM   4828 NE2  HSE   145       9.832  16.794   8.122  1.00  1.00      7S   
ATOM   4829 HE2  HSE   145      10.606  17.285   8.520  1.00  0.00      7S   
ATOM   4830 CD2  HSE   145       9.151  15.697   8.606  1.00  1.00      7S   
ATOM   4831 HD2  HSE   145       9.395  15.162   9.513  1.00  0.00      7S   
ATOM   4832 C    HSE   145       5.705  15.105   9.639  1.00  1.00      7S   
ATOM   4833 O    HSE   145       5.750  14.171  10.437  1.00  1.00      7S   
ATOM   4834 N    ILE   146       5.638  16.393  10.043  1.00  1.00      7S   
ATOM   4835 HN   ILE   146       5.663  17.141   9.384  1.00  0.00      7S   
ATOM   4836 CA   ILE   146       5.500  16.775  11.429  1.00  1.00      7S   
ATOM   4837 HA   ILE   146       5.762  15.939  12.061  1.00  0.00      7S   
ATOM   4838 CB   ILE   146       6.396  17.949  11.778  1.00  1.00      7S   
ATOM   4839 HB   ILE   146       6.130  18.830  11.150  1.00  0.00      7S   
ATOM   4840 CG2  ILE   146       6.222  18.316  13.265  1.00  1.00      7S   
ATOM   4841 HG21 ILE   146       6.489  17.446  13.902  1.00  0.00      7S   
ATOM   4842 HG22 ILE   146       5.182  18.628  13.485  1.00  0.00      7S   
ATOM   4843 HG23 ILE   146       6.887  19.161  13.529  1.00  0.00      7S   
ATOM   4844 CG1  ILE   146       7.866  17.575  11.487  1.00  1.00      7S   
ATOM   4845 HG11 ILE   146       7.979  17.324  10.411  1.00  0.00      7S   
ATOM   4846 HG12 ILE   146       8.132  16.673  12.084  1.00  0.00      7S   
ATOM   4847 CD   ILE   146       8.841  18.702  11.825  1.00  1.00      7S   
ATOM   4848 HD1  ILE   146       8.907  18.849  12.924  1.00  0.00      7S   
ATOM   4849 HD2  ILE   146       8.500  19.653  11.361  1.00  0.00      7S   
ATOM   4850 HD3  ILE   146       9.853  18.455  11.450  1.00  0.00      7S   
ATOM   4851 C    ILE   146       4.051  17.074  11.707  1.00  1.00      7S   
ATOM   4852 O    ILE   146       3.501  16.579  12.690  1.00  1.00      7S   
ATOM   4853 N    GLY   147       3.390  17.886  10.844  1.00  1.00      7S   
ATOM   4854 HN   GLY   147       3.861  18.302  10.069  1.00  0.00      7S   
ATOM   4855 CA   GLY   147       1.963  18.133  10.915  1.00  1.00      7S   
ATOM   4856 HA1  GLY   147       1.450  17.188  10.822  1.00  0.00      7S   
ATOM   4857 HA2  GLY   147       1.719  18.824  10.125  1.00  0.00      7S   
ATOM   4858 C    GLY   147       1.562  18.776  12.201  1.00  1.00      7S   
ATOM   4859 O    GLY   147       2.358  19.462  12.827  1.00  1.00      7S   
ATOM   4860 N    THR   148       0.306  18.547  12.617  1.00  1.00      7S   
ATOM   4861 HN   THR   148      -0.311  17.992  12.068  1.00  0.00      7S   
ATOM   4862 CA   THR   148      -0.274  19.077  13.828  1.00  1.00      7S   
ATOM   4863 HA   THR   148       0.393  19.811  14.264  1.00  0.00      7S   
ATOM   4864 CB   THR   148      -1.616  19.726  13.545  1.00  1.00      7S   
ATOM   4865 HB   THR   148      -2.169  19.941  14.482  1.00  0.00      7S   
ATOM   4866 OG1  THR   148      -2.436  18.897  12.730  1.00  1.00      7S   
ATOM   4867 HG1  THR   148      -2.068  18.968  11.845  1.00  0.00      7S   
ATOM   4868 CG2  THR   148      -1.383  21.056  12.808  1.00  1.00      7S   
ATOM   4869 HG21 THR   148      -0.853  20.886  11.847  1.00  0.00      7S   
ATOM   4870 HG22 THR   148      -0.771  21.743  13.430  1.00  0.00      7S   
ATOM   4871 HG23 THR   148      -2.356  21.544  12.591  1.00  0.00      7S   
ATOM   4872 C    THR   148      -0.415  17.962  14.837  1.00  1.00      7S   
ATOM   4873 O    THR   148      -0.018  16.825  14.589  1.00  1.00      7S   
ATOM   4874 N    ARG   149      -0.958  18.289  16.031  1.00  1.00      7S   
ATOM   4875 HN   ARG   149      -1.333  19.199  16.198  1.00  0.00      7S   
ATOM   4876 CA   ARG   149      -0.939  17.406  17.168  1.00  1.00      7S   
ATOM   4877 HA   ARG   149      -0.426  16.487  16.924  1.00  0.00      7S   
ATOM   4878 CB   ARG   149      -0.224  18.081  18.350  1.00  1.00      7S   
ATOM   4879 HB1  ARG   149      -0.864  18.913  18.715  1.00  0.00      7S   
ATOM   4880 HB2  ARG   149       0.715  18.544  17.975  1.00  0.00      7S   
ATOM   4881 CG   ARG   149       0.160  17.137  19.500  1.00  1.00      7S   
ATOM   4882 HG1  ARG   149       1.249  17.203  19.693  1.00  0.00      7S   
ATOM   4883 HG2  ARG   149      -0.058  16.084  19.213  1.00  0.00      7S   
ATOM   4884 CD   ARG   149      -0.565  17.449  20.802  1.00  1.00      7S   
ATOM   4885 HD1  ARG   149      -0.150  16.859  21.637  1.00  0.00      7S   
ATOM   4886 HD2  ARG   149      -1.639  17.241  20.692  1.00  0.00      7S   
ATOM   4887 NE   ARG   149      -0.431  18.895  21.107  1.00  1.00      7S   
ATOM   4888 HE   ARG   149      -0.033  19.505  20.418  1.00  0.00      7S   
ATOM   4889 CZ   ARG   149      -1.002  19.450  22.206  1.00  1.00      7S   
ATOM   4890 NH1  ARG   149      -1.611  18.672  23.137  1.00  1.00      7S   
ATOM   4891 HH11 ARG   149      -1.679  17.686  22.983  1.00  0.00      7S   
ATOM   4892 HH12 ARG   149      -2.002  19.088  23.954  1.00  0.00      7S   
ATOM   4893 NH2  ARG   149      -0.937  20.794  22.380  1.00  1.00      7S   
ATOM   4894 HH21 ARG   149      -0.456  21.347  21.699  1.00  0.00      7S   
ATOM   4895 HH22 ARG   149      -1.291  21.198  23.222  1.00  0.00      7S   
ATOM   4896 C    ARG   149      -2.343  17.082  17.586  1.00  1.00      7S   
ATOM   4897 O    ARG   149      -3.272  17.860  17.370  1.00  1.00      7S   
ATOM   4898 N    ASN   150      -2.511  15.903  18.223  1.00  1.00      7S   
ATOM   4899 HN   ASN   150      -1.754  15.264  18.331  1.00  0.00      7S   
ATOM   4900 CA   ASN   150      -3.755  15.486  18.803  1.00  1.00      7S   
ATOM   4901 HA   ASN   150      -4.540  15.893  18.200  1.00  0.00      7S   
ATOM   4902 CB   ASN   150      -3.842  13.954  18.807  1.00  1.00      7S   
ATOM   4903 HB1  ASN   150      -3.932  13.590  19.838  1.00  0.00      7S   
ATOM   4904 HB2  ASN   150      -2.900  13.527  18.420  1.00  0.00      7S   
ATOM   4905 CG   ASN   150      -5.005  13.451  17.948  1.00  1.00      7S   
ATOM   4906 OD1  ASN   150      -5.984  14.159  17.690  1.00  1.00      7S   
ATOM   4907 ND2  ASN   150      -4.877  12.174  17.487  1.00  1.00      7S   
ATOM   4908 HD21 ASN   150      -5.595  11.795  16.906  1.00  0.00      7S   
ATOM   4909 HD22 ASN   150      -4.068  11.638  17.724  1.00  0.00      7S   
ATOM   4910 C    ASN   150      -3.849  15.992  20.232  1.00  1.00      7S   
ATOM   4911 O    ASN   150      -3.080  15.523  21.068  1.00  1.00      7S   
ATOM   4912 N    PRO   151      -4.718  16.925  20.592  1.00  1.00      7S   
ATOM   4913 CD   PRO   151      -5.773  17.461  19.738  1.00  1.00      7S   
ATOM   4914 HD1  PRO   151      -6.688  16.852  19.888  1.00  0.00      7S   
ATOM   4915 HD2  PRO   151      -5.499  17.491  18.662  1.00  0.00      7S   
ATOM   4916 CA   PRO   151      -4.638  17.635  21.857  1.00  1.00      7S   
ATOM   4917 HA   PRO   151      -3.633  17.987  21.991  1.00  0.00      7S   
ATOM   4918 CB   PRO   151      -5.614  18.813  21.719  1.00  1.00      7S   
ATOM   4919 HB1  PRO   151      -5.157  19.762  22.069  1.00  0.00      7S   
ATOM   4920 HB2  PRO   151      -6.562  18.645  22.265  1.00  0.00      7S   
ATOM   4921 CG   PRO   151      -5.972  18.881  20.237  1.00  1.00      7S   
ATOM   4922 HG1  PRO   151      -7.000  19.251  20.061  1.00  0.00      7S   
ATOM   4923 HG2  PRO   151      -5.243  19.531  19.724  1.00  0.00      7S   
ATOM   4924 C    PRO   151      -4.973  16.771  23.042  1.00  1.00      7S   
ATOM   4925 O    PRO   151      -4.075  16.427  23.807  1.00  1.00      7S   
ATOM   4926 N    ALA   152      -6.259  16.405  23.206  1.00  1.00      7S   
ATOM   4927 HN   ALA   152      -6.967  16.744  22.590  1.00  0.00      7S   
ATOM   4928 CA   ALA   152      -6.718  15.610  24.313  1.00  1.00      7S   
ATOM   4929 HA   ALA   152      -6.239  15.969  25.214  1.00  0.00      7S   
ATOM   4930 CB   ALA   152      -8.237  15.739  24.470  1.00  1.00      7S   
ATOM   4931 HB1  ALA   152      -8.766  15.435  23.542  1.00  0.00      7S   
ATOM   4932 HB2  ALA   152      -8.487  16.800  24.682  1.00  0.00      7S   
ATOM   4933 HB3  ALA   152      -8.607  15.122  25.315  1.00  0.00      7S   
ATOM   4934 C    ALA   152      -6.372  14.150  24.159  1.00  1.00      7S   
ATOM   4935 O    ALA   152      -6.554  13.375  25.095  1.00  1.00      7S   
ATOM   4936 N    ASN   153      -5.848  13.738  22.981  1.00  1.00      7S   
ATOM   4937 HN   ASN   153      -5.730  14.372  22.220  1.00  0.00      7S   
ATOM   4938 CA   ASN   153      -5.458  12.366  22.746  1.00  1.00      7S   
ATOM   4939 HA   ASN   153      -6.014  11.719  23.408  1.00  0.00      7S   
ATOM   4940 CB   ASN   153      -5.730  11.920  21.295  1.00  1.00      7S   
ATOM   4941 HB1  ASN   153      -5.503  10.845  21.157  1.00  0.00      7S   
ATOM   4942 HB2  ASN   153      -5.090  12.476  20.614  1.00  0.00      7S   
ATOM   4943 CG   ASN   153      -7.170  12.219  20.873  1.00  1.00      7S   
ATOM   4944 OD1  ASN   153      -7.424  13.037  19.984  1.00  1.00      7S   
ATOM   4945 ND2  ASN   153      -8.129  11.526  21.541  1.00  1.00      7S   
ATOM   4946 HD21 ASN   153      -9.087  11.668  21.299  1.00  0.00      7S   
ATOM   4947 HD22 ASN   153      -7.857  10.892  22.262  1.00  0.00      7S   
ATOM   4948 C    ASN   153      -3.993  12.177  23.067  1.00  1.00      7S   
ATOM   4949 O    ASN   153      -3.643  11.317  23.872  1.00  1.00      7S   
ATOM   4950 N    ASN   154      -3.096  12.980  22.448  1.00  1.00      7S   
ATOM   4951 HN   ASN   154      -3.375  13.654  21.767  1.00  0.00      7S   
ATOM   4952 CA   ASN   154      -1.672  12.931  22.714  1.00  1.00      7S   
ATOM   4953 HA   ASN   154      -1.416  11.966  23.130  1.00  0.00      7S   
ATOM   4954 CB   ASN   154      -0.821  13.169  21.440  1.00  1.00      7S   
ATOM   4955 HB1  ASN   154       0.262  13.096  21.671  1.00  0.00      7S   
ATOM   4956 HB2  ASN   154      -1.036  14.179  21.032  1.00  0.00      7S   
ATOM   4957 CG   ASN   154      -1.136  12.114  20.372  1.00  1.00      7S   
ATOM   4958 OD1  ASN   154      -1.670  11.034  20.644  1.00  1.00      7S   
ATOM   4959 ND2  ASN   154      -0.772  12.453  19.101  1.00  1.00      7S   
ATOM   4960 HD21 ASN   154      -0.977  11.825  18.352  1.00  0.00      7S   
ATOM   4961 HD22 ASN   154      -0.372  13.350  18.921  1.00  0.00      7S   
ATOM   4962 C    ASN   154      -1.345  13.978  23.761  1.00  1.00      7S   
ATOM   4963 O    ASN   154      -2.189  14.325  24.585  1.00  1.00      7S   
ATOM   4964 N    ALA   155      -0.088  14.484  23.777  1.00  1.00      7S   
ATOM   4965 HN   ALA   155       0.589  14.222  23.094  1.00  0.00      7S   
ATOM   4966 CA   ALA   155       0.378  15.376  24.812  1.00  1.00      7S   
ATOM   4967 HA   ALA   155      -0.460  15.742  25.389  1.00  0.00      7S   
ATOM   4968 CB   ALA   155       1.384  14.691  25.754  1.00  1.00      7S   
ATOM   4969 HB1  ALA   155       2.265  14.320  25.187  1.00  0.00      7S   
ATOM   4970 HB2  ALA   155       0.900  13.824  26.250  1.00  0.00      7S   
ATOM   4971 HB3  ALA   155       1.734  15.393  26.540  1.00  0.00      7S   
ATOM   4972 C    ALA   155       1.060  16.562  24.194  1.00  1.00      7S   
ATOM   4973 O    ALA   155       1.590  16.490  23.087  1.00  1.00      7S   
ATOM   4974 N    ALA   156       1.061  17.699  24.926  1.00  1.00      7S   
ATOM   4975 HN   ALA   156       0.631  17.735  25.825  1.00  0.00      7S   
ATOM   4976 CA   ALA   156       1.661  18.929  24.475  1.00  1.00      7S   
ATOM   4977 HA   ALA   156       1.663  18.948  23.392  1.00  0.00      7S   
ATOM   4978 CB   ALA   156       0.902  20.158  24.998  1.00  1.00      7S   
ATOM   4979 HB1  ALA   156       1.004  20.267  26.097  1.00  0.00      7S   
ATOM   4980 HB2  ALA   156      -0.179  20.042  24.786  1.00  0.00      7S   
ATOM   4981 HB3  ALA   156       1.255  21.085  24.497  1.00  0.00      7S   
ATOM   4982 C    ALA   156       3.076  19.016  24.966  1.00  1.00      7S   
ATOM   4983 O    ALA   156       3.389  18.598  26.080  1.00  1.00      7S   
ATOM   4984 N    ILE   157       3.971  19.567  24.121  1.00  1.00      7S   
ATOM   4985 HN   ILE   157       3.701  19.893  23.215  1.00  0.00      7S   
ATOM   4986 CA   ILE   157       5.378  19.675  24.419  1.00  1.00      7S   
ATOM   4987 HA   ILE   157       5.645  18.941  25.166  1.00  0.00      7S   
ATOM   4988 CB   ILE   157       6.247  19.469  23.182  1.00  1.00      7S   
ATOM   4989 HB   ILE   157       6.045  20.280  22.444  1.00  0.00      7S   
ATOM   4990 CG2  ILE   157       7.743  19.513  23.565  1.00  1.00      7S   
ATOM   4991 HG21 ILE   157       7.969  18.712  24.300  1.00  0.00      7S   
ATOM   4992 HG22 ILE   157       8.016  20.495  23.999  1.00  0.00      7S   
ATOM   4993 HG23 ILE   157       8.380  19.361  22.669  1.00  0.00      7S   
ATOM   4994 CG1  ILE   157       5.886  18.130  22.500  1.00  1.00      7S   
ATOM   4995 HG11 ILE   157       4.816  18.148  22.194  1.00  0.00      7S   
ATOM   4996 HG12 ILE   157       6.023  17.302  23.229  1.00  0.00      7S   
ATOM   4997 CD   ILE   157       6.729  17.853  21.254  1.00  1.00      7S   
ATOM   4998 HD1  ILE   157       7.779  17.625  21.538  1.00  0.00      7S   
ATOM   4999 HD2  ILE   157       6.727  18.743  20.587  1.00  0.00      7S   
ATOM   5000 HD3  ILE   157       6.320  16.983  20.700  1.00  0.00      7S   
ATOM   5001 C    ILE   157       5.604  21.044  24.989  1.00  1.00      7S   
ATOM   5002 O    ILE   157       5.140  22.040  24.447  1.00  1.00      7S   
ATOM   5003 N    VAL   158       6.341  21.142  26.116  1.00  1.00      7S   
ATOM   5004 HN   VAL   158       6.710  20.337  26.573  1.00  0.00      7S   
ATOM   5005 CA   VAL   158       6.643  22.412  26.734  1.00  1.00      7S   
ATOM   5006 HA   VAL   158       5.714  22.951  26.856  1.00  0.00      7S   
ATOM   5007 CB   VAL   158       7.302  22.242  28.095  1.00  1.00      7S   
ATOM   5008 HB   VAL   158       8.188  21.574  28.004  1.00  0.00      7S   
ATOM   5009 CG1  VAL   158       7.757  23.601  28.656  1.00  1.00      7S   
ATOM   5010 HG11 VAL   158       6.923  24.331  28.604  1.00  0.00      7S   
ATOM   5011 HG12 VAL   158       8.621  23.995  28.081  1.00  0.00      7S   
ATOM   5012 HG13 VAL   158       8.063  23.490  29.717  1.00  0.00      7S   
ATOM   5013 CG2  VAL   158       6.294  21.583  29.056  1.00  1.00      7S   
ATOM   5014 HG21 VAL   158       5.978  20.586  28.685  1.00  0.00      7S   
ATOM   5015 HG22 VAL   158       5.398  22.229  29.170  1.00  0.00      7S   
ATOM   5016 HG23 VAL   158       6.764  21.454  30.054  1.00  0.00      7S   
ATOM   5017 C    VAL   158       7.532  23.205  25.807  1.00  1.00      7S   
ATOM   5018 O    VAL   158       8.559  22.714  25.342  1.00  1.00      7S   
ATOM   5019 N    LEU   159       7.112  24.451  25.488  1.00  1.00      7S   
ATOM   5020 HN   LEU   159       6.265  24.827  25.863  1.00  0.00      7S   
ATOM   5021 CA   LEU   159       7.797  25.293  24.545  1.00  1.00      7S   
ATOM   5022 HA   LEU   159       8.041  24.698  23.674  1.00  0.00      7S   
ATOM   5023 CB   LEU   159       6.899  26.473  24.115  1.00  1.00      7S   
ATOM   5024 HB1  LEU   159       6.749  27.166  24.970  1.00  0.00      7S   
ATOM   5025 HB2  LEU   159       5.903  26.047  23.866  1.00  0.00      7S   
ATOM   5026 CG   LEU   159       7.380  27.286  22.895  1.00  1.00      7S   
ATOM   5027 HG   LEU   159       7.964  26.619  22.221  1.00  0.00      7S   
ATOM   5028 CD1  LEU   159       6.183  27.811  22.085  1.00  1.00      7S   
ATOM   5029 HD11 LEU   159       5.548  28.473  22.711  1.00  0.00      7S   
ATOM   5030 HD12 LEU   159       5.559  26.974  21.711  1.00  0.00      7S   
ATOM   5031 HD13 LEU   159       6.554  28.385  21.214  1.00  0.00      7S   
ATOM   5032 CD2  LEU   159       8.286  28.450  23.321  1.00  1.00      7S   
ATOM   5033 HD21 LEU   159       9.260  28.071  23.689  1.00  0.00      7S   
ATOM   5034 HD22 LEU   159       7.796  29.018  24.139  1.00  0.00      7S   
ATOM   5035 HD23 LEU   159       8.466  29.134  22.466  1.00  0.00      7S   
ATOM   5036 C    LEU   159       9.063  25.798  25.178  1.00  1.00      7S   
ATOM   5037 O    LEU   159       9.035  26.661  26.055  1.00  1.00      7S   
ATOM   5038 N    GLN   160      10.209  25.228  24.750  1.00  1.00      7S   
ATOM   5039 HN   GLN   160      10.196  24.456  24.118  1.00  0.00      7S   
ATOM   5040 CA   GLN   160      11.507  25.646  25.210  1.00  1.00      7S   
ATOM   5041 HA   GLN   160      11.401  26.328  26.041  1.00  0.00      7S   
ATOM   5042 CB   GLN   160      12.397  24.461  25.637  1.00  1.00      7S   
ATOM   5043 HB1  GLN   160      13.367  24.854  26.018  1.00  0.00      7S   
ATOM   5044 HB2  GLN   160      12.599  23.821  24.750  1.00  0.00      7S   
ATOM   5045 CG   GLN   160      11.755  23.598  26.736  1.00  1.00      7S   
ATOM   5046 HG1  GLN   160      10.746  23.271  26.410  1.00  0.00      7S   
ATOM   5047 HG2  GLN   160      11.652  24.187  27.672  1.00  0.00      7S   
ATOM   5048 CD   GLN   160      12.623  22.367  27.007  1.00  1.00      7S   
ATOM   5049 OE1  GLN   160      13.857  22.428  26.978  1.00  1.00      7S   
ATOM   5050 NE2  GLN   160      11.942  21.215  27.279  1.00  1.00      7S   
ATOM   5051 HE21 GLN   160      12.452  20.378  27.471  1.00  0.00      7S   
ATOM   5052 HE22 GLN   160      10.943  21.220  27.280  1.00  0.00      7S   
ATOM   5053 C    GLN   160      12.187  26.377  24.094  1.00  1.00      7S   
ATOM   5054 O    GLN   160      11.757  26.330  22.942  1.00  1.00      7S   
ATOM   5055 N    LEU   161      13.277  27.093  24.439  1.00  1.00      7S   
ATOM   5056 HN   LEU   161      13.609  27.110  25.380  1.00  0.00      7S   
ATOM   5057 CA   LEU   161      14.040  27.866  23.497  1.00  1.00      7S   
ATOM   5058 HA   LEU   161      13.928  27.426  22.520  1.00  0.00      7S   
ATOM   5059 CB   LEU   161      13.641  29.360  23.496  1.00  1.00      7S   
ATOM   5060 HB1  LEU   161      14.360  29.930  22.870  1.00  0.00      7S   
ATOM   5061 HB2  LEU   161      13.702  29.748  24.536  1.00  0.00      7S   
ATOM   5062 CG   LEU   161      12.230  29.652  22.943  1.00  1.00      7S   
ATOM   5063 HG   LEU   161      11.499  28.975  23.440  1.00  0.00      7S   
ATOM   5064 CD1  LEU   161      11.806  31.089  23.267  1.00  1.00      7S   
ATOM   5065 HD11 LEU   161      12.510  31.807  22.805  1.00  0.00      7S   
ATOM   5066 HD12 LEU   161      11.805  31.256  24.364  1.00  0.00      7S   
ATOM   5067 HD13 LEU   161      10.789  31.291  22.869  1.00  0.00      7S   
ATOM   5068 CD2  LEU   161      12.160  29.400  21.429  1.00  1.00      7S   
ATOM   5069 HD21 LEU   161      12.393  28.339  21.202  1.00  0.00      7S   
ATOM   5070 HD22 LEU   161      12.895  30.047  20.905  1.00  0.00      7S   
ATOM   5071 HD23 LEU   161      11.142  29.629  21.050  1.00  0.00      7S   
ATOM   5072 C    LEU   161      15.482  27.769  23.920  1.00  1.00      7S   
ATOM   5073 O    LEU   161      15.739  27.547  25.105  1.00  1.00      7S   
ATOM   5074 N    PRO   162      16.463  27.932  23.020  1.00  1.00      7S   
ATOM   5075 CD   PRO   162      16.263  27.963  21.566  1.00  1.00      7S   
ATOM   5076 HD1  PRO   162      15.945  28.985  21.273  1.00  0.00      7S   
ATOM   5077 HD2  PRO   162      15.509  27.217  21.229  1.00  0.00      7S   
ATOM   5078 CA   PRO   162      17.873  27.856  23.370  1.00  1.00      7S   
ATOM   5079 HA   PRO   162      18.077  26.898  23.827  1.00  0.00      7S   
ATOM   5080 CB   PRO   162      18.620  28.064  22.042  1.00  1.00      7S   
ATOM   5081 HB1  PRO   162      19.550  27.462  21.993  1.00  0.00      7S   
ATOM   5082 HB2  PRO   162      18.868  29.137  21.881  1.00  0.00      7S   
ATOM   5083 CG   PRO   162      17.626  27.629  20.961  1.00  1.00      7S   
ATOM   5084 HG1  PRO   162      17.797  28.160  20.003  1.00  0.00      7S   
ATOM   5085 HG2  PRO   162      17.704  26.531  20.802  1.00  0.00      7S   
ATOM   5086 C    PRO   162      18.228  28.937  24.351  1.00  1.00      7S   
ATOM   5087 O    PRO   162      17.632  30.010  24.313  1.00  1.00      7S   
ATOM   5088 N    GLN   163      19.184  28.666  25.255  1.00  1.00      7S   
ATOM   5089 HN   GLN   163      19.620  27.771  25.292  1.00  0.00      7S   
ATOM   5090 CA   GLN   163      19.590  29.614  26.261  1.00  1.00      7S   
ATOM   5091 HA   GLN   163      18.709  29.931  26.802  1.00  0.00      7S   
ATOM   5092 CB   GLN   163      20.605  28.983  27.237  1.00  1.00      7S   
ATOM   5093 HB1  GLN   163      21.101  29.773  27.841  1.00  0.00      7S   
ATOM   5094 HB2  GLN   163      21.389  28.469  26.636  1.00  0.00      7S   
ATOM   5095 CG   GLN   163      19.980  27.943  28.186  1.00  1.00      7S   
ATOM   5096 HG1  GLN   163      20.789  27.449  28.765  1.00  0.00      7S   
ATOM   5097 HG2  GLN   163      19.441  27.170  27.597  1.00  0.00      7S   
ATOM   5098 CD   GLN   163      19.018  28.615  29.172  1.00  1.00      7S   
ATOM   5099 OE1  GLN   163      19.153  29.794  29.514  1.00  1.00      7S   
ATOM   5100 NE2  GLN   163      18.016  27.818  29.647  1.00  1.00      7S   
ATOM   5101 HE21 GLN   163      17.357  28.195  30.295  1.00  0.00      7S   
ATOM   5102 HE22 GLN   163      17.949  26.870  29.340  1.00  0.00      7S   
ATOM   5103 C    GLN   163      20.212  30.825  25.611  1.00  1.00      7S   
ATOM   5104 O    GLN   163      21.202  30.712  24.889  1.00  1.00      7S   
ATOM   5105 N    GLY   164      19.593  32.009  25.831  1.00  1.00      7S   
ATOM   5106 HN   GLY   164      18.809  32.071  26.446  1.00  0.00      7S   
ATOM   5107 CA   GLY   164      20.034  33.246  25.223  1.00  1.00      7S   
ATOM   5108 HA1  GLY   164      20.968  33.085  24.706  1.00  0.00      7S   
ATOM   5109 HA2  GLY   164      20.117  33.971  26.017  1.00  0.00      7S   
ATOM   5110 C    GLY   164      19.060  33.785  24.214  1.00  1.00      7S   
ATOM   5111 O    GLY   164      19.356  34.778  23.551  1.00  1.00      7S   
ATOM   5112 N    THR   165      17.867  33.165  24.064  1.00  1.00      7S   
ATOM   5113 HN   THR   165      17.636  32.340  24.575  1.00  0.00      7S   
ATOM   5114 CA   THR   165      16.858  33.620  23.129  1.00  1.00      7S   
ATOM   5115 HA   THR   165      17.346  33.841  22.188  1.00  0.00      7S   
ATOM   5116 CB   THR   165      15.790  32.570  22.896  1.00  1.00      7S   
ATOM   5117 HB   THR   165      15.302  32.292  23.858  1.00  0.00      7S   
ATOM   5118 OG1  THR   165      16.387  31.407  22.344  1.00  1.00      7S   
ATOM   5119 HG1  THR   165      16.791  30.938  23.086  1.00  0.00      7S   
ATOM   5120 CG2  THR   165      14.723  33.071  21.911  1.00  1.00      7S   
ATOM   5121 HG21 THR   165      15.197  33.629  21.080  1.00  0.00      7S   
ATOM   5122 HG22 THR   165      14.008  33.744  22.429  1.00  0.00      7S   
ATOM   5123 HG23 THR   165      14.156  32.215  21.486  1.00  0.00      7S   
ATOM   5124 C    THR   165      16.221  34.884  23.655  1.00  1.00      7S   
ATOM   5125 O    THR   165      15.770  34.936  24.797  1.00  1.00      7S   
ATOM   5126 N    THR   166      16.196  35.948  22.820  1.00  1.00      7S
[truncated: 156,571 more chars]
