# Supplementary material for: Genetic Uniformity of a Specific Region in SARS-CoV-2 Genome and In-Silico Target-Oriented Repurposing of N-Acetyl-D-Glucosamine
Source: Preprints.org preprint supplement (doi:10.20944/preprints202005.0397.v1), 2020-05-24
Supplement: Supplementary file 7 [file supplementary › S7 File/test.inp]

* Title
*

BOMLEV -1
SET lib /path/to/toppar

OPEN UNIT 1 CARD READ NAME @lib/top_all22_prot.inp
READ RTF CARD UNIT 1
CLOSE UNIT 1

!
! Uncomment to load the extra topology file, if needed
!
!OPEN UNIT 1 CARD READ NAME "merged.rtf"
!READ RTF CARD UNIT 1 APPEND
!CLOSE UNIT 1


OPEN UNIT 1 CARD READ NAME @lib/par_all22_prot.inp
READ PARA CARD UNIT 1
CLOSE UNIT 1

!
! Uncomment to load the extra parameter file, if needed
!
!OPEN UNIT 1 CARD READ NAME "merged.par"
!READ PARA CARD UNIT 1 APPEND
!CLOSE UNIT 1

!
! Loads the complex topology
!
OPEN UNIT 1 CARD READ NAME "complex.psf"
READ PSF CARD UNIT 1
CLOSE UNIT 1

!
! Loads the complex coordinates
!
OPEN UNIT 1 CARD READ NAME "complex.crd"
READ COOR CARD UNIT 1
CLOSE UNIT 1

ENERGY

STOP
