# Supplementary figures and images for: Genetic Uniformity of a Specific Region in SARS-CoV-2 Genome and In-Silico Target-Oriented Repurposing of N-Acetyl-D-Glucosamine
Source: Preprints.org preprint supplement (doi:10.20944/preprints202005.0397.v1), 2020-05-24

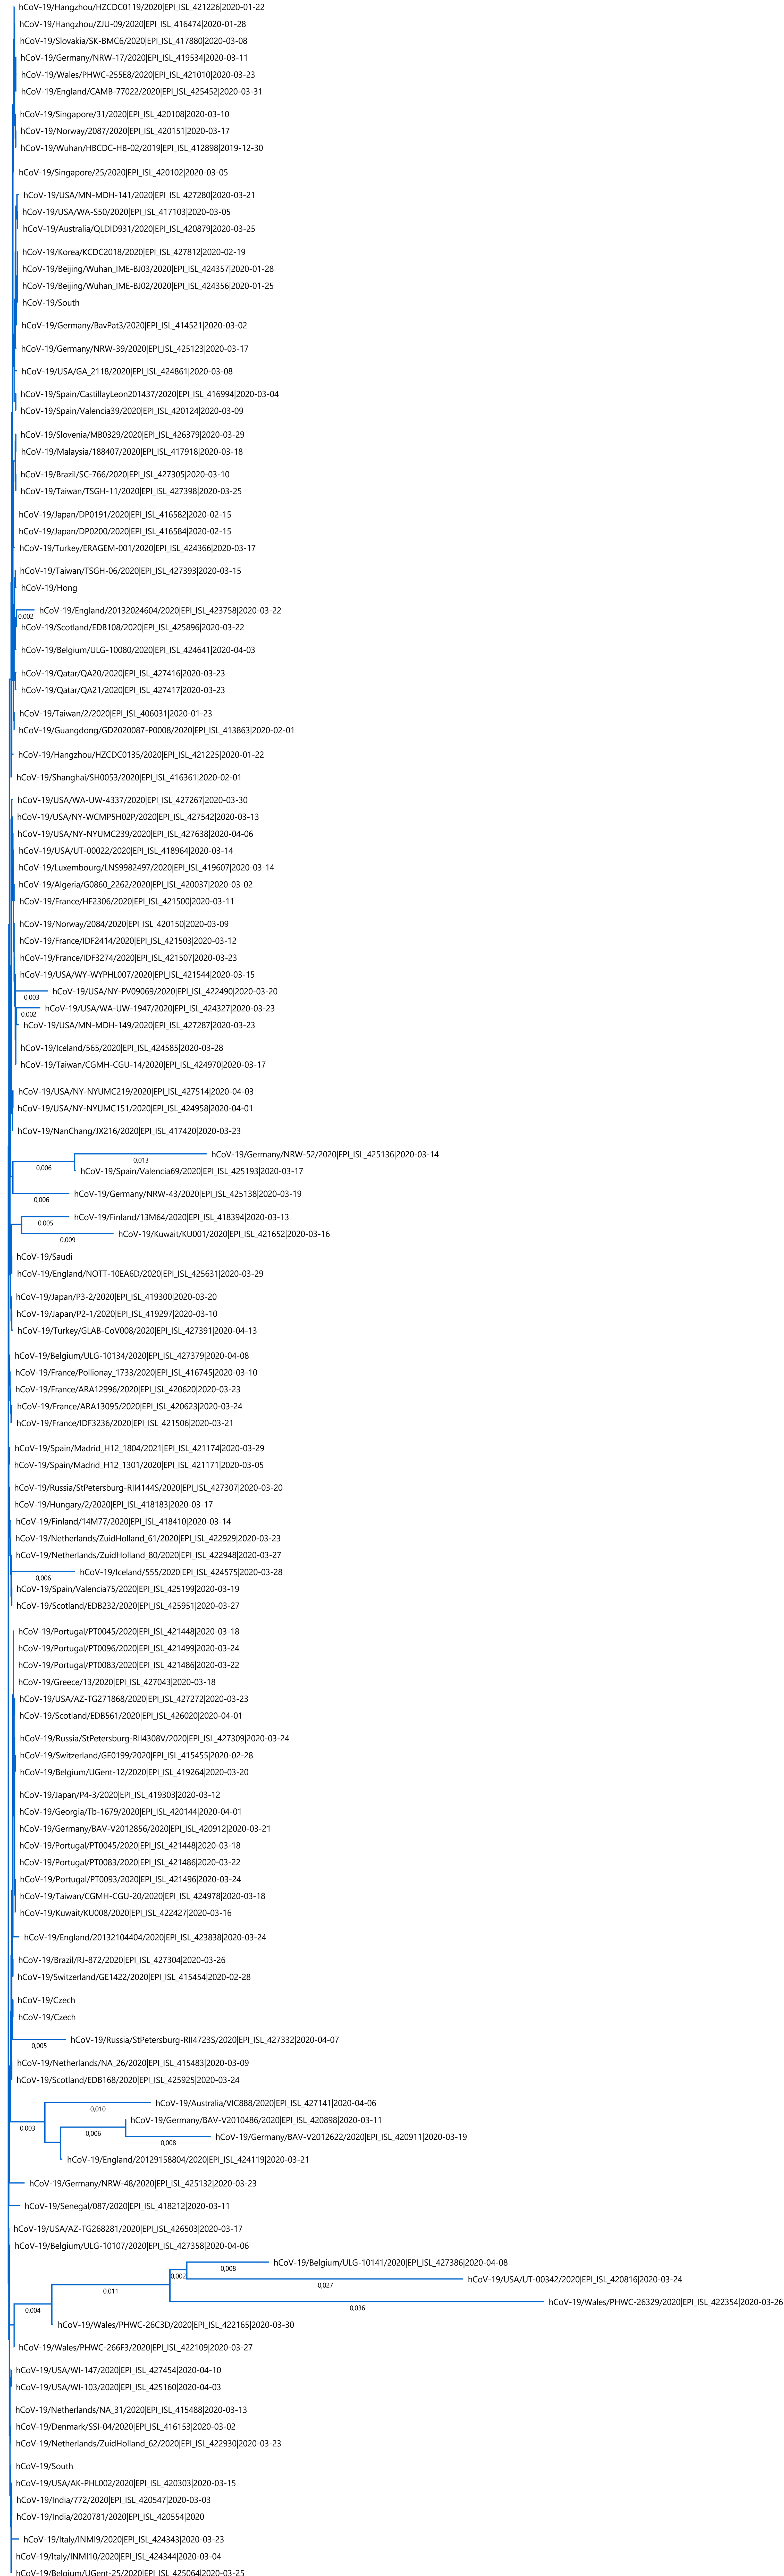

Supplement: Supplementary file 4 [file supplementary]
